# Supplementary material for: Genome-Wide Analyses Suggest Mechanisms Involving Early B-Cell Development in Canine IgA Deficiency
Source: PubMed Central journal article supplement (PMC4520476; doi:10.1371/journal.pone.0133844), 2015-07-30

A

## Chromosome 8

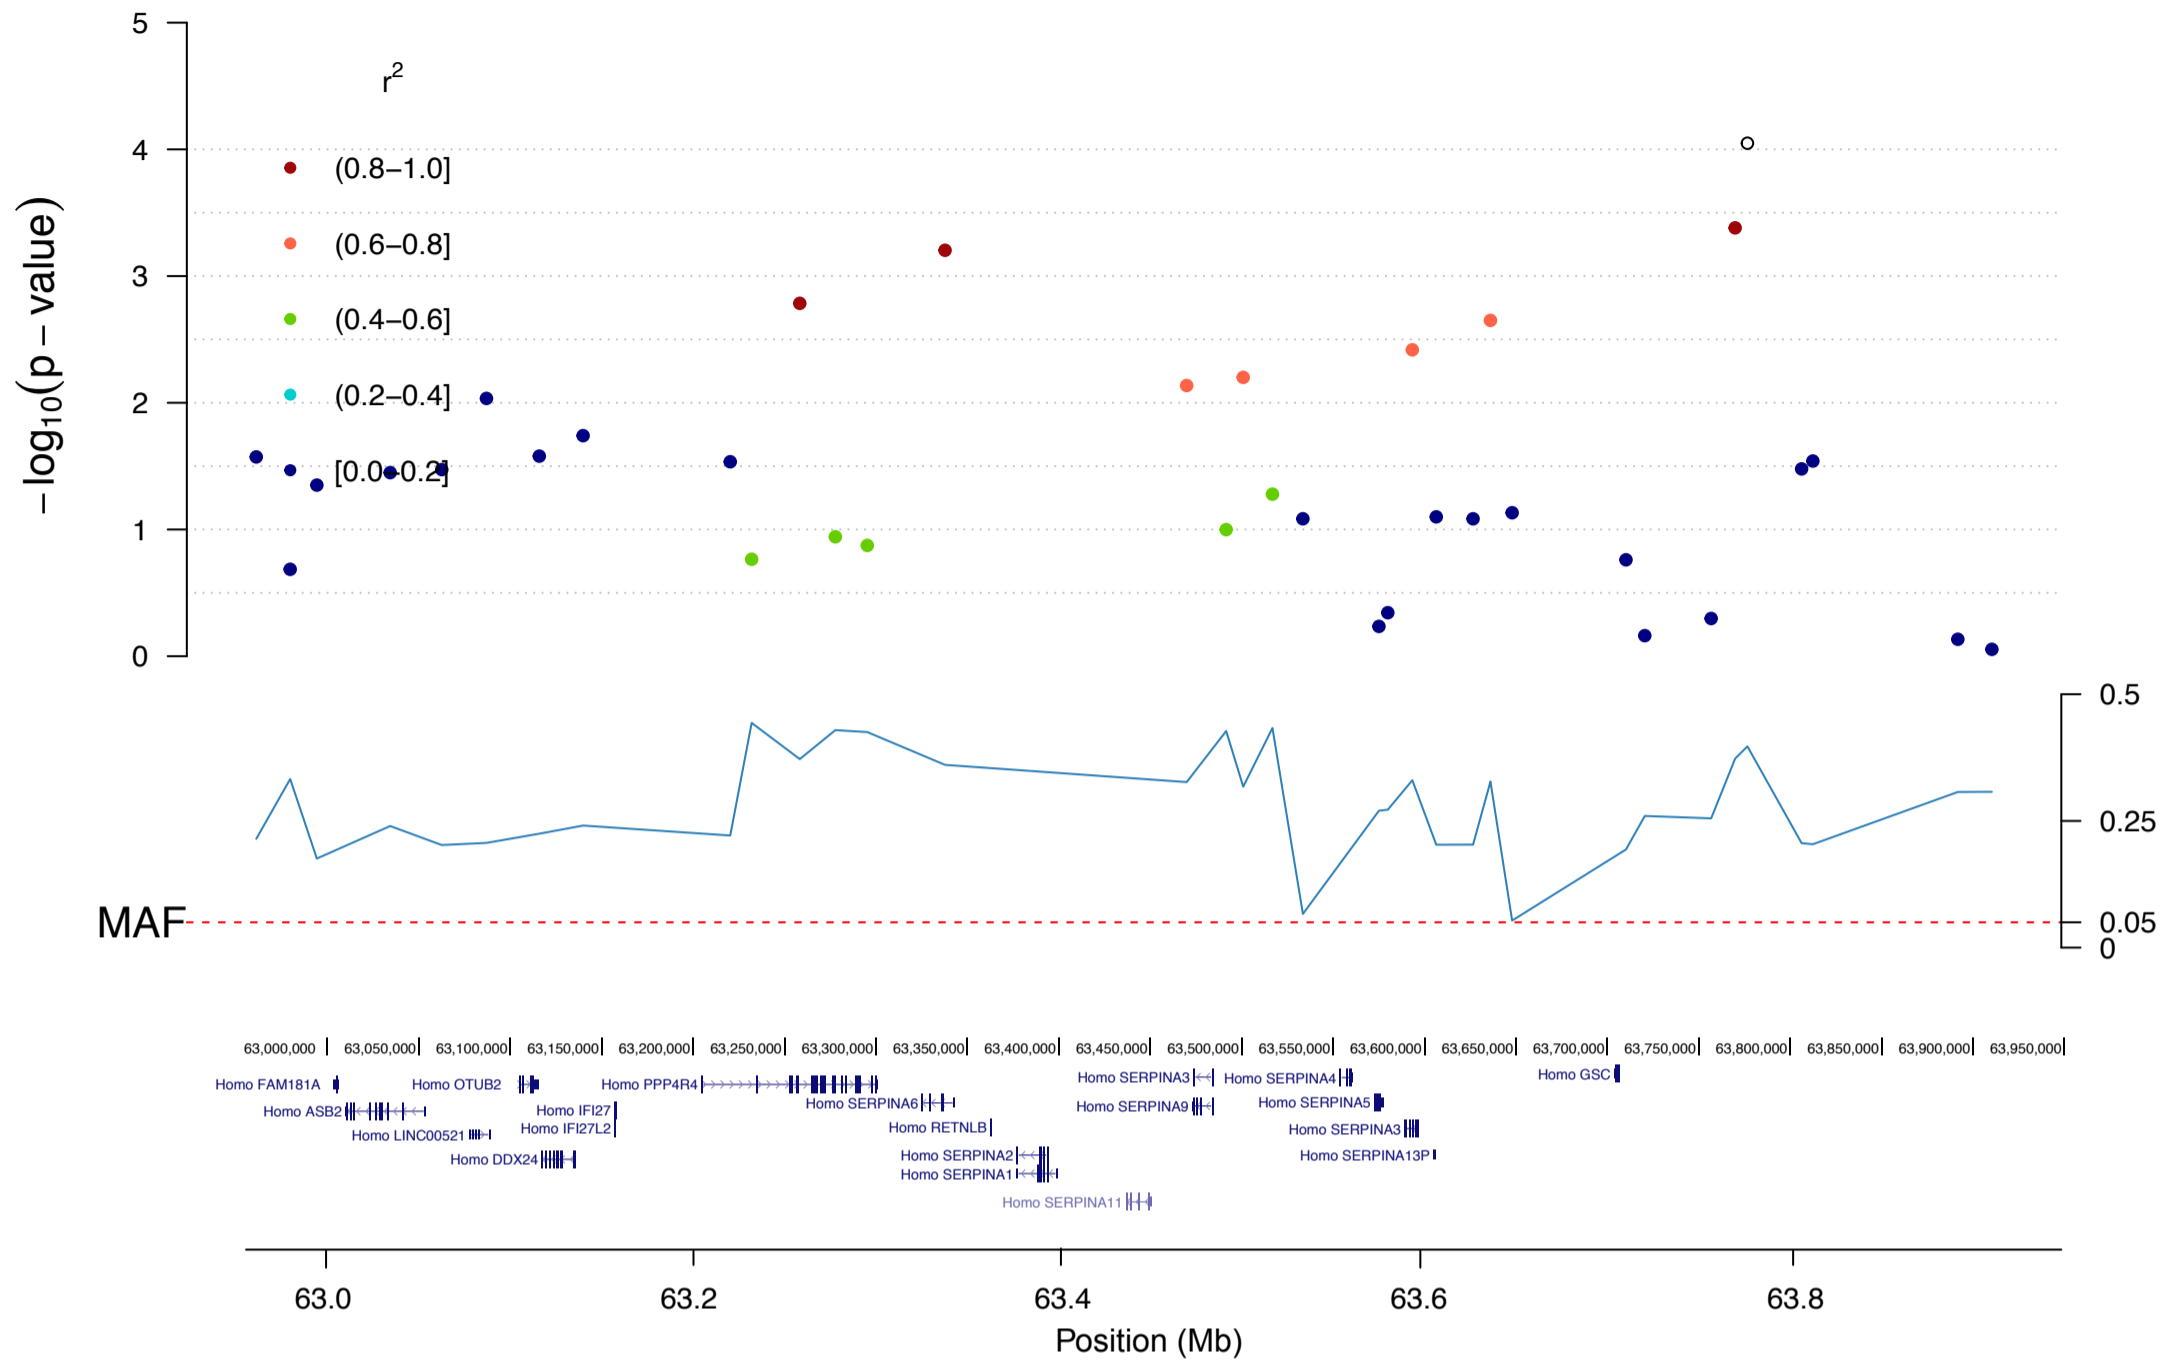

B

## Chromosome 23

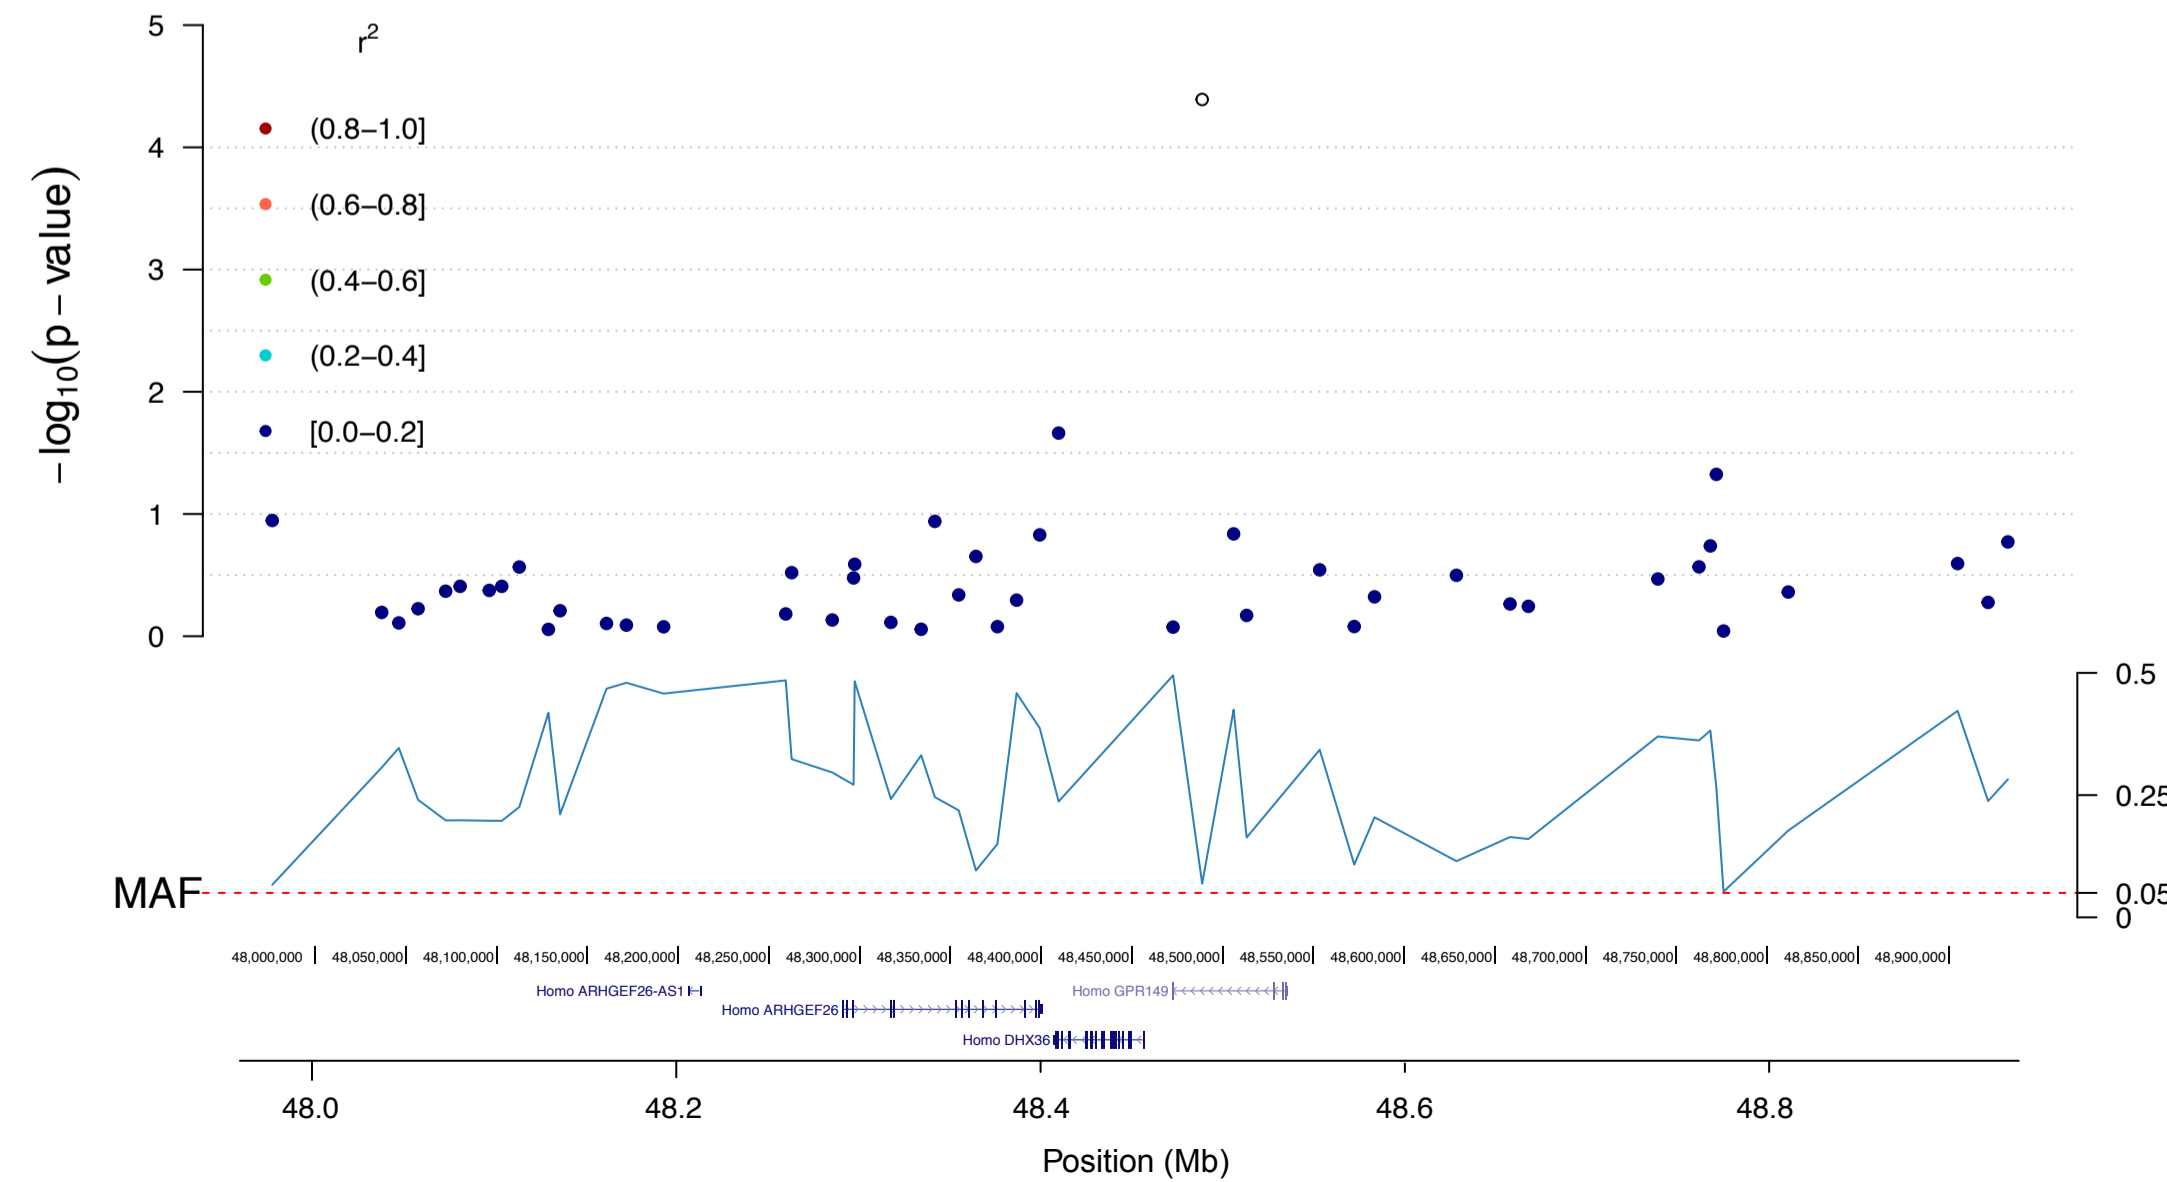

Supplement: pone.0133844.s006.pdf [file pone.0133844.s006.pdf]
