# Supplementary material for: Genome-Wide Analyses Suggest Mechanisms Involving Early B-Cell Development in Canine IgA Deficiency
Source: PubMed Central journal article supplement (PMC4520476; doi:10.1371/journal.pone.0133844), 2015-07-30
Supplement: pone.0133844.s011.pdf [file pone.0133844.s011.pdf]

**Table S1. Age and sex correlation in four breeds and subpopulations in German shepherd**

|                         | Pearson's product-moment correlation |             |                 |             | Welch Two sample t-test |              |                      |
|-------------------------|--------------------------------------|-------------|-----------------|-------------|-------------------------|--------------|----------------------|
|                         | Age correlation                      | Age p-value | Sex correlation | Sex p-value | subpop1 mean            | subpop2 mean | p-value (difference) |
| <b>GSD</b>              |                                      |             |                 |             |                         |              |                      |
| Five percentile groups  | 0.2024165                            | 5.526e-06   | 0.02855347      | 0.5258      | 3.071942                | 2.802752     | 0.03555              |
| Four percentile groups  | 0.1915557                            | 1.745e-05   | 0.008781387     | 0.8453      | 2.553957                | 2.362385     | 0.06232              |
| Three percentile groups | 0.1800242                            | 5.526e-05   | 0.005338612     | 0.9056      | 2.043165                | 1.908257     | 0.06754              |
| Two percentile groups   | 0.2525495                            | 3.541e-05   | 0.007779909     | 0.9003      | 0.5395683               | 0.4390244    | 0.105                |
| <b>GR</b>               |                                      |             |                 |             |                         |              |                      |
| Five percentile groups  | 0.3568886                            | 3.302e-05   | 0.01597527      | 0.8367      | no subpop               |              |                      |
| Four percentile groups  | 0.3637513                            | 2.262e-05   | -0.01893164     | 0.807       | no subpop               |              |                      |
| Three percentile groups | 0.3552561                            | 3.608e-05   | -0.03545191     | 0.6472      | no subpop               |              |                      |
| Two percentile groups   | 0.4542228                            | 5.426e-05   | -0.01550264     | 0.8802      | no subpop               |              |                      |
| <b>LR</b>               |                                      |             |                 |             |                         |              |                      |
| Five percentile groups  | 0.5008708                            | 1.732e-09   | 0.1129993       | 0.1822      | no subpop               |              |                      |
| Four percentile groups  | 0.5081548                            | 9.182e-10   | 0.109205        | 0.1974      | no subpop               |              |                      |
| Three percentile groups | 0.4356144                            | 2.761e-07   | 0.07357515      | 0.3859      | no subpop               |              |                      |
| Two percentile groups   | 0.6270826                            | 8.165e-09   | 0.1323422       | 0.2512      | no subpop               |              |                      |
| <b>SP</b>               |                                      |             |                 |             |                         |              |                      |
| Five percentile groups  | 0.3016215                            | 0.003133    | 0.03741546      | 0.7203      | no subpop               |              |                      |
| Four percentile groups  | 0.3035804                            | 0.002935    | 0.006011288     | 0.9541      | no subpop               |              |                      |
| Three percentile groups | 0.2745766                            | 0.007402    | 0.006632365     | 0.9494      | no subpop               |              |                      |
| Two percentile groups   | 0.3720542                            | 0.006083    | -0.06609195     | 0.6382      | no subpop               |              |                      |
