# Supplementary material for: Genome-Wide Analyses Suggest Mechanisms Involving Early B-Cell Development in Canine IgA Deficiency
Source: PubMed Central journal article supplement (PMC4520476; doi:10.1371/journal.pone.0133844), 2015-07-30
Supplement: pone.0133844.s012.pdf [file pone.0133844.s012.pdf]

**Table S2. Breakdown of sample and markers in GWAS**

|     |         | SNPs and individuals genotyped | SNPs and individuals removed due to low call rate (<95%) | SNPs removed due to low MAF (<0.05) | SNP removed due to deviation from HWE (p<1e-06%) | Individuals removed due to FDR**<1% | Individuals removed due to IBS*** >=0.95 | Individuals removed due to trait or covariate missing | <b>Final nr. of SNPs and individuals in GWAS analyses - 3, 4, 5 groups analyses</b> | Final nr. of SNPs and individuals in GWAS analyses - cases vs controls |
|-----|---------|--------------------------------|----------------------------------------------------------|-------------------------------------|--------------------------------------------------|-------------------------------------|------------------------------------------|-------------------------------------------------------|-------------------------------------------------------------------------------------|------------------------------------------------------------------------|
| GSD | markers | 173662                         | 10298                                                    | 70127                               | 7355                                             | -                                   | -                                        | -                                                     | <b>88704 (51%)</b>                                                                  | 88704                                                                  |
|     | dogs    | 516                            | 14                                                       | -                                   | -                                                | 1                                   | 6                                        | 0                                                     | <b>496</b>                                                                          | 262                                                                    |
| GR  | markers | 174376                         | 4021                                                     | 66538                               | 4719                                             | -                                   | -                                        | -                                                     | <b>100680 (58%)</b>                                                                 | 100680                                                                 |
|     | dogs    | 187                            | 0                                                        | -                                   | -                                                | -                                   | 2                                        | 58                                                    | <b>129</b>                                                                          | 73                                                                     |
| LR  | markers | 174376                         | 3197                                                     | 54937                               | 4794                                             | -                                   | -                                        | -                                                     | <b>112428 (64%)</b>                                                                 | 112428                                                                 |
|     | dogs    | 141*                           | 0                                                        | -                                   | -                                                | 0                                   | 0                                        | 13                                                    | <b>128</b>                                                                          | 69                                                                     |
| SP  | markers | 173662                         | 9631                                                     | 55678                               | 3116                                             | -                                   | -                                        | -                                                     | <b>106622 (61%)</b>                                                                 | 106622                                                                 |
|     | dogs    | 96                             | 2                                                        | -                                   | -                                                | 1                                   | 0                                        | 0                                                     | <b>94</b>                                                                           | 53                                                                     |

\*Out of 302 genotyped individuals 141 were analyzed for IgA, thus only these were included in the QC

\*\*Too high autosomal heterozygosity

\*\*\*Mean IBS based on 2000 autosomal markers

Note: SNPs and individuals left may be higher than the subtraction due to group overlap between exclusion criteria
