# Supplementary material for: Genome-Wide Analyses Suggest Mechanisms Involving Early B-Cell Development in Canine IgA Deficiency
Source: PubMed Central journal article supplement (PMC4520476; doi:10.1371/journal.pone.0133844), 2015-07-30
Supplement: pone.0133844.s014.pdf [file pone.0133844.s014.pdf]

Table S4. Allele frequencies based on 20 German shepherds across chr28: 9000091-11999424 (canfam3)

| CHROM                           | POS     | N_ALLELES              | N_CHR | {ALLELE:FREQ}             |
|---------------------------------|---------|------------------------|-------|---------------------------|
| chr28                           | 9000091 | 2                      | 38    | T:1 C:0                   |
| chr28                           | 9000246 | 2                      | 36    | T:1 TCAA:0                |
| chr28                           | 9000473 | 2                      | 38    | A:1 G:0                   |
| chr28                           | 9000522 | 2                      | 40    | T:1 C:0                   |
| chr28                           | 9000657 | 2                      | 36    | C:1 CTTTAT:0              |
| chr28                           | 9000789 | 2                      | 38    | T:1 C:0                   |
| chr28                           | 9000939 | 2                      | 40    | CGG:1 C:0                 |
| chr28                           | 9001032 | 2                      | 40    | C:1 G:0                   |
| chr28                           | 9001109 | 2                      | 36    | C:1 G:0                   |
| chr28                           | 9001229 | 5                      | 40    | GAGAGAAGAGA:0.075 G:0.125 |
| GAGAGA:0.225                    |         | GAGAGAAGAGAAGAGA:0.425 |       |                           |
| GAGAGAAGAGAAGAGAAGAGAAGAGA:0.15 |         |                        |       |                           |
| chr28                           | 9001674 | 2                      | 40    | G:1 A:0                   |
| chr28                           | 9001787 | 2                      | 36    | CA:1 C:0                  |
| chr28                           | 9001833 | 2                      | 40    | A:1 G:0                   |
| chr28                           | 9001982 | 2                      | 36    | AT:1 A:0                  |
| chr28                           | 9002236 | 2                      | 36    | ATCCAGGAC:1 A:0           |
| chr28                           | 9002267 | 2                      | 36    | C:1 T:0                   |
| chr28                           | 9002509 | 2                      | 36    | C:0.833333 T:0.166667     |
| chr28                           | 9002784 | 2                      | 38    | A:1 G:0                   |
| chr28                           | 9002831 | 2                      | 38    | C:1 T:0                   |
| chr28                           | 9003437 | 2                      | 38    | T:1 C:0                   |
| chr28                           | 9003632 | 2                      | 36    | G:1 GCTCT:0               |
| chr28                           | 9003633 | 2                      | 36    | C:1 CTCTT:0               |
| chr28                           | 9003904 | 2                      | 38    | C:1 T:0                   |
| chr28                           | 9004320 | 2                      | 38    | A:1 C:0                   |
| chr28                           | 9004520 | 2                      | 40    | A:1 C:0                   |
| chr28                           | 9004564 | 2                      | 38    | A:1 G:0                   |
| chr28                           | 9004919 | 2                      | 32    | T:1 C:0                   |
| chr28                           | 9005309 | 2                      | 38    | A:1 G:0                   |
| chr28                           | 9005338 | 2                      | 36    | T:1 C:0                   |
| chr28                           | 9005502 | 2                      | 38    | G:1 C:0                   |
| chr28                           | 9005638 | 2                      | 40    | G:1 A:0                   |
| chr28                           | 9005688 | 2                      | 40    | A:1 C:0                   |
| chr28                           | 9006019 | 2                      | 36    | A:1 AC:0                  |
| chr28                           | 9006568 | 2                      | 36    | T:0.833333 TA:0.166667    |
| chr28                           | 9007042 | 2                      | 32    | A:1 C:0                   |
| chr28                           | 9007529 | 2                      | 40    | CA:1 C:0                  |
| chr28                           | 9008103 | 2                      | 36    | T:1 C:0                   |
| chr28                           | 9008419 | 2                      | 38    | C:1 T:0                   |
| chr28                           | 9008506 | 2                      | 36    | CAGAG:1 C:0               |
| chr28                           | 9008594 | 2                      | 32    | C:1 T:0                   |
| chr28                           | 9008801 | 2                      | 38    | C:1 CA:0                  |
| chr28                           | 9008900 | 2                      | 38    | T:0.973684 TA:0.0263158   |
| chr28                           | 9009257 | 2                      | 36    | A:0.944444 G:0.0555556    |
| chr28                           | 9009318 | 2                      | 36    | G:1 A:0                   |
| chr28                           | 9009369 | 2                      | 38    | AAC:1 A:0                 |
| chr28                           | 9009943 | 2                      | 34    | C:1 T:0                   |
| chr28                           | 9010058 | 2                      | 38    | GTT:1 G:0                 |
| chr28                           | 9010471 | 2                      | 32    | G:0.96875 A:0.03125       |
| chr28                           | 9011133 | 2                      | 38    | A:1 C:0                   |

|              |                |   |    |                   |               |          |
|--------------|----------------|---|----|-------------------|---------------|----------|
| chr28        | 9011297        | 2 | 38 | G:1               | A:0           |          |
| chr28        | 9011572        | 2 | 38 | A:1               | T:0           |          |
| chr28        | 9011586        | 2 | 36 | TGTA:1            | T:0           |          |
| chr28        | 9012020        | 2 | 40 | CCTTTCTTTCT:0.9   | C:0.1         |          |
| chr28        | 9012155        | 2 | 38 | C:1               | T:0           |          |
| chr28        | 9012207        | 2 | 38 | GCTC:1            | G:0           |          |
| chr28        | 9012229        | 2 | 38 | G:1               | T:0           |          |
| chr28        | 9012232        | 2 | 38 | A:1               | C:0           |          |
| chr28        | 9012244        | 2 | 38 | C:1               | T:0           |          |
| chr28        | 9012364        | 2 | 40 | G:1               | A:0           |          |
| chr28        | 9012499        | 2 | 34 | C:1               | T:0           |          |
| chr28        | 9012965        | 2 | 40 | G:1               | A:0           |          |
| chr28        | 9013095        | 2 | 38 | C:1               | G:0           |          |
| chr28        | 9013098        | 2 | 38 | A:1               | G:0           |          |
| chr28        | 9013127        | 2 | 38 | T:1               | C:0           |          |
| chr28        | 9013382        | 2 | 36 | T:1               | C:0           |          |
| chr28        | 9013443        | 2 | 38 | G:1               | A:0           |          |
| chr28        | 9013453        | 2 | 38 | G:1               | A:0           |          |
| chr28        | 9013626        | 2 | 40 | C:1               | T:0           |          |
| chr28        | 9013745        | 2 | 40 | T:1               | C:0           |          |
| chr28        | 9013848        | 2 | 40 | C:1               | T:0           |          |
| chr28        | 9013894        | 2 | 40 | C:1               | T:0           |          |
| chr28        | 9013951        | 2 | 34 | C:1               | G:0           |          |
| chr28        | 9014048        | 2 | 40 | G:1               | A:0           |          |
| chr28        | 9014089        | 2 | 38 | A:1               | C:0           |          |
| chr28        | 9014093        | 2 | 36 | C:0.972222        | CA:0.0277778  |          |
| chr28        | 9014112        | 2 | 34 | T:1               | C:0           |          |
| chr28        | 9014138        | 2 | 40 | T:1               | G:0           |          |
| chr28        | 9014282        | 2 | 38 | C:1               | T:0           |          |
| chr28        | 9014788        | 2 | 38 | G:1               | GTCA:0        |          |
| chr28        | 9014789        | 2 | 38 | G:1               | GGATCCTGATC:0 |          |
| chr28        | 9014793        | 2 | 38 | C:1               | T:0           |          |
| chr28        | 9014795        | 2 | 38 | CG:1              | C:0           |          |
| chr28        | 9014797        | 2 | 38 | G:1               | T:0           |          |
| chr28        | 9014841        | 2 | 38 | C:1               | T:0           |          |
| chr28        | 9014988        | 2 | 40 | G:1               | T:0           |          |
| chr28        | 9015209        | 2 | 36 | CAT:1             | C:0           |          |
| chr28        | 9015491        | 2 | 38 | A:1               | G:0           |          |
| chr28        | 9015823        | 2 | 40 | T:1               | A:0           |          |
| chr28        | 9016088        | 2 | 40 | C:1               | G:0           |          |
| chr28        | 9016103        | 2 | 40 | A:1               | G:0           |          |
| chr28        | 9016322        | 2 | 38 | A:1               | AAT:0         |          |
| chr28        | 9016326        | 2 | 36 | CACAT:1           | C:0           |          |
| chr28        | 9016330        | 5 | 38 | T:0.421053        | C:0.0263158   |          |
| TAC:0.105263 | TACAC:0.368421 |   |    | TACACAC:0.0789474 |               |          |
| chr28        | 9016360        | 3 | 38 | C:1               | G:0           | CACAG:0  |
| chr28        | 9016682        | 2 | 34 | G:1               | GA:0          |          |
| chr28        | 9016800        | 2 | 40 | T:1               | A:0           |          |
| chr28        | 9016982        | 2 | 38 | A:1               | G:0           |          |
| chr28        | 9017130        | 3 | 40 | GAA:0.9           | G:0.025       | GA:0.075 |
| chr28        | 9017172        | 2 | 36 | A:1               | AAAGC:0       |          |
| chr28        | 9017284        | 2 | 36 | C:1               | T:0           |          |
| chr28        | 9017304        | 2 | 36 | T:1               | G:0           |          |
| chr28        | 9017446        | 2 | 34 | C:1               | T:0           |          |

|                |            |              |    |                            |                |
|----------------|------------|--------------|----|----------------------------|----------------|
| chr28          | 9017524    | 2            | 30 | TCTCTCC:0.766667           | T:0.233333     |
| chr28          | 9017528    | 2            | 30 | TCC:0.433333               | T:0.566667     |
| chr28          | 9017953    | 2            | 34 | G:1                        | A:0            |
| chr28          | 9018548    | 2            | 40 | T:0.1                      | G:0.9          |
| chr28          | 9018662    | 2            | 36 | C:1                        | G:0            |
| chr28          | 9018674    | 2            | 32 | TA:1                       | T:0            |
| chr28          | 9018856    | 5            | 38 | CAAATAAATAAAT:0.552632     | C:             |
| 0.210526       | CTAAAT:0   | CTAAATAAAT:0 |    | CAAATAAATAAATAAAT:0.236842 |                |
| chr28          | 9018860    | 2            | 38 | T:1                        | TCTC:0         |
| chr28          | 9018864    | 2            | 38 | T:1                        | TCTC:0         |
| chr28          | 9019603    | 2            | 36 | C:1                        | T:0            |
| chr28          | 9019751    | 2            | 34 | A:1                        | AT:0           |
| chr28          | 9020694    | 2            | 40 | C:1                        | CAAAT:0        |
| chr28          | 9020794    | 2            | 34 | A:1                        | G:0            |
| chr28          | 9020798    | 2            | 34 | A:1                        | G:0            |
| chr28          | 9021002    | 2            | 36 | A:1                        | T:0            |
| chr28          | 9022289    | 2            | 40 | C:1                        | T:0            |
| chr28          | 9022290    | 2            | 40 | A:1                        | G:0            |
| chr28          | 9022351    | 2            | 36 | C:1                        | T:0            |
| chr28          | 9022352    | 2            | 36 | G:1                        | A:0            |
| chr28          | 9022420    | 2            | 40 | G:0.825                    | T:0.175        |
| chr28          | 9022668    | 2            | 32 | AG:1                       | A:0            |
| chr28          | 9022984    | 2            | 24 | C:0.875                    | CT:0.125       |
| chr28          | 9023016    | 2            | 26 | G:1                        | T:0            |
| chr28          | 9023157    | 2            | 36 | C:1                        | CTGTGTG:0      |
| chr28          | 9023159    | 3            | 36 | CTG:0.944444               | C:0.0555556    |
| GTG:0          |            |              |    |                            |                |
| chr28          | 9023202    | 2            | 30 | T:1                        | TA:0           |
| chr28          | 9023408    | 2            | 32 | G:1                        | GTAAA:0        |
| chr28          | 9023450    | 3            | 36 | TGA:0.611111               | T:0.0833333    |
| TGAGA:0.305556 |            |              |    |                            |                |
| chr28          | 9023552    | 2            | 30 | G:1                        | GATC:0         |
| chr28          | 9024684    | 2            | 38 | A:1                        | G:0            |
| chr28          | 9024720    | 4            | 32 | T:0.09375                  | TA:0.53125     |
| TAA:0.25       | TAAA:0.125 |              |    |                            |                |
| chr28          | 9024730    | 2            | 36 | A:1                        | AAAAAAAAAAAG:0 |
| chr28          | 9024778    | 2            | 36 | C:1                        | T:0            |
| chr28          | 9025290    | 2            | 40 | C:1                        | T:0            |
| chr28          | 9025339    | 2            | 38 | T:1                        | TG:0           |
| chr28          | 9025345    | 2            | 38 | A:1                        | T:0            |
| chr28          | 9025361    | 2            | 36 | T:1                        | A:0            |
| chr28          | 9025362    | 2            | 36 | A:1                        | T:0            |
| chr28          | 9025730    | 2            | 26 | AAT:1                      | A:0            |
| chr28          | 9025731    | 2            | 26 | AT:0                       | A:1            |
| chr28          | 9025899    | 2            | 32 | C:1                        | T:0            |
| chr28          | 9026013    | 2            | 36 | TG:1                       | T:0            |
| chr28          | 9026014    | 2            | 36 | G:1                        | T:0            |
| chr28          | 9026018    | 2            | 36 | T:1                        | A:0            |
| chr28          | 9026023    | 2            | 36 | T:1                        | A:0            |
| chr28          | 9026048    | 2            | 36 | C:1                        | T:0            |
| chr28          | 9026069    | 2            | 36 | G:1                        | C:0            |
| chr28          | 9026275    | 3            | 34 | TAA:0.735294               | T:0.0882353    |
| TA:0.176471    |            |              |    |                            |                |
| chr28          | 9026405    | 2            | 34 | G:1                        | A:0            |

|       |         |   |    |                           |                      |             |
|-------|---------|---|----|---------------------------|----------------------|-------------|
| chr28 | 9026635 | 2 | 38 | A:1                       | G:0                  |             |
| chr28 | 9026679 | 2 | 38 | T:1                       | C:0                  |             |
| chr28 | 9026960 | 2 | 38 | A:1                       | G:0                  |             |
| chr28 | 9027069 | 2 | 34 | C:1                       | A:0                  |             |
| chr28 | 9028226 | 2 | 40 | C:1                       | T:0                  |             |
| chr28 | 9028471 | 2 | 40 | C:1                       | T:0                  |             |
| chr28 | 9029031 | 2 | 36 | C:0.638889                | CA:0.361111          |             |
| chr28 | 9029032 | 2 | 40 | A:1                       | AAAAAAAAAATAAAAAAT:0 |             |
| chr28 | 9029064 | 2 | 38 | T:1                       | C:0                  |             |
| chr28 | 9029759 | 2 | 26 | C:0.961538                | CT:0.0384615         |             |
| chr28 | 9029808 | 2 | 40 | CACAGAGAGAGAGAGAGAG:0.925 | C:0.075              |             |
| chr28 | 9029810 | 3 | 40 | CAG:0.275                 | C:0.55               | CAGAG:0.175 |
| chr28 | 9029956 | 2 | 34 | G:1                       | GAGCC:0              |             |
| chr28 | 9030144 | 2 | 36 | A:0.861111                | G:0.138889           |             |
| chr28 | 9030185 | 2 | 36 | T:1                       | A:0                  |             |
| chr28 | 9030186 | 2 | 36 | T:1                       | A:0                  |             |
| chr28 | 9030657 | 2 | 36 | G:1                       | A:0                  |             |
| chr28 | 9030699 | 2 | 36 | C:0.833333                | T:0.166667           |             |
| chr28 | 9031234 | 2 | 34 | G:1                       | A:0                  |             |
| chr28 | 9031701 | 2 | 36 | C:0.666667                | T:0.333333           |             |
| chr28 | 9031738 | 2 | 36 | T:1                       | C:0                  |             |
| chr28 | 9031741 | 3 | 30 | GT:0.766667               | G:0.0333333          | GTT:0.2     |
| chr28 | 9032465 | 2 | 38 | A:1                       | G:0                  |             |
| chr28 | 9033585 | 2 | 34 | T:1                       | A:0                  |             |
| chr28 | 9033586 | 2 | 34 | T:1                       | C:0                  |             |
| chr28 | 9033837 | 2 | 28 | TA:0.821429               | T:0.178571           |             |
| chr28 | 9034448 | 2 | 40 | G:1                       | A:0                  |             |
| chr28 | 9035127 | 2 | 36 | C:1                       | CTTAT:0              |             |
| chr28 | 9035331 | 2 | 36 | T:1                       | TAATA:0              |             |
| chr28 | 9036932 | 2 | 40 | T:1                       | C:0                  |             |
| chr28 | 9037083 | 2 | 36 | T:0.222222                | C:0.777778           |             |
| chr28 | 9037089 | 2 | 36 | T:1                       | C:0                  |             |
| chr28 | 9037329 | 2 | 34 | G:1                       | A:0                  |             |
| chr28 | 9037585 | 2 | 34 | G:1                       | GA:0                 |             |
| chr28 | 9037594 | 2 | 34 | C:1                       | A:0                  |             |
| chr28 | 9037846 | 2 | 36 | CTG:1                     | C:0                  |             |
| chr28 | 9038349 | 2 | 38 | A:1                       | G:0                  |             |
| chr28 | 9038962 | 2 | 36 | G:1                       | A:0                  |             |
| chr28 | 9039044 | 2 | 36 | T:0.833333                | G:0.166667           |             |
| chr28 | 9039059 | 2 | 38 | C:1                       | CCTT:0               |             |
| chr28 | 9039125 | 2 | 34 | C:1                       | T:0                  |             |
| chr28 | 9039672 | 2 | 36 | G:1                       | A:0                  |             |
| chr28 | 9039766 | 2 | 36 | G:1                       | C:0                  |             |
| chr28 | 9040250 | 2 | 36 | T:0.861111                | C:0.138889           |             |
| chr28 | 9040258 | 2 | 36 | GC:0.416667               | G:0.583333           |             |
| chr28 | 9040648 | 2 | 38 | G:1                       | C:0                  |             |
| chr28 | 9040777 | 2 | 38 | C:1                       | CACTA:0              |             |
| chr28 | 9040794 | 2 | 40 | A:1                       | G:0                  |             |
| chr28 | 9040979 | 2 | 34 | T:1                       | C:0                  |             |
| chr28 | 9040991 | 2 | 36 | ACT:1                     | A:0                  |             |
| chr28 | 9041256 | 2 | 38 | G:1                       | A:0                  |             |
| chr28 | 9041508 | 2 | 34 | A:1                       | C:0                  |             |

|                                       |         |   |    |                         |               |     |  |
|---------------------------------------|---------|---|----|-------------------------|---------------|-----|--|
| chr28                                 | 9041559 | 2 | 34 | G:1                     | A:0           |     |  |
| chr28                                 | 9041584 | 2 | 36 | CTT:1                   | C:0           |     |  |
| chr28                                 | 9042088 | 2 | 34 | G:1                     | A:0           |     |  |
| chr28                                 | 9042090 | 2 | 34 | A:1                     | T:0           |     |  |
| chr28                                 | 9042656 | 2 | 36 | T:1                     | G:0           |     |  |
| chr28                                 | 9042713 | 2 | 38 | C:1                     | T:0           |     |  |
| chr28                                 | 9043052 | 2 | 38 | GC:1                    | G:0           |     |  |
| chr28                                 | 9046466 | 2 | 36 | G:1                     | A:0           |     |  |
| chr28                                 | 9046907 | 2 | 38 | A:1                     | AAC:0         |     |  |
| chr28                                 | 9047244 | 2 | 36 | A:0                     | G:1           |     |  |
| chr28                                 | 9047405 | 2 | 38 | G:1                     | A:0           |     |  |
| chr28                                 | 9047791 | 2 | 36 | T:0                     | TG:1          |     |  |
| chr28                                 | 9048050 | 2 | 36 | T:1                     | C:0           |     |  |
| chr28                                 | 9048208 | 2 | 22 | AT:0                    | A:1           |     |  |
| chr28                                 | 9048224 | 2 | 18 | T:1                     | C:0           |     |  |
| chr28                                 | 9048896 | 2 | 30 | GC:1                    | G:0           |     |  |
| chr28                                 | 9049363 | 2 | 40 | AAAG:1                  | A:0           |     |  |
| chr28                                 | 9049366 | 3 | 40 | GAAGAAAGAAAGAAAGA:0.275 | G:0.625       |     |  |
| GAAGA:0.1                             |         |   |    |                         |               |     |  |
| chr28                                 | 9049429 | 2 | 40 | G:1                     | GA:0          |     |  |
| chr28                                 | 9050173 | 2 | 34 | TG:1                    | T:0           |     |  |
| chr28                                 | 9050240 | 2 | 38 | A:1                     | C:0           |     |  |
| chr28                                 | 9051784 | 2 | 36 | G:1                     | C:0           |     |  |
| chr28                                 | 9051823 | 2 | 36 | C:1                     | T:0           |     |  |
| chr28                                 | 9051826 | 2 | 36 | C:1                     | T:0           |     |  |
| chr28                                 | 9052674 | 2 | 38 | A:1                     | T:0           |     |  |
| chr28                                 | 9052923 | 2 | 36 | G:1                     | A:0           |     |  |
| chr28                                 | 9052947 | 4 | 38 | AACACACAC:0.184211      | A:            |     |  |
| 0.157895 AAC:0.552632 AACAC:0.105263  |         |   |    |                         |               |     |  |
| chr28                                 | 9053125 | 2 | 38 | G:1                     | A:0           |     |  |
| chr28                                 | 9053140 | 2 | 40 | A:1                     | G:0           |     |  |
| chr28                                 | 9053532 | 2 | 40 | G:1                     | C:0           |     |  |
| chr28                                 | 9055264 | 2 | 38 | GT:0.263158             | G:0.736842    |     |  |
| chr28                                 | 9056134 | 2 | 38 | GGCAGCCCCCGTGGT:1       | G:0           |     |  |
| chr28                                 | 9056143 | 2 | 38 | C:1                     | G:0           |     |  |
| chr28                                 | 9056457 | 2 | 38 | A:1                     | G:0           |     |  |
| chr28                                 | 9057481 | 2 | 40 | T:1                     | A:0           |     |  |
| chr28                                 | 9058292 | 2 | 36 | T:1                     | TA:0          |     |  |
| chr28                                 | 9059203 | 2 | 36 | ATTTCTT:1               | A:0           |     |  |
| chr28                                 | 9059843 | 2 | 40 | G:1                     | C:0           |     |  |
| chr28                                 | 9060075 | 4 | 40 | TACAAA:0.925            | T:0.075       |     |  |
| TACAAAACAAA:0 TACAAAACAAAACAAAACAAA:0 |         |   |    |                         |               |     |  |
| chr28                                 | 9060852 | 2 | 38 | C:0.315789              | T:0.684211    |     |  |
| chr28                                 | 9061609 | 2 | 40 | A:1                     | C:0           |     |  |
| chr28                                 | 9061679 | 2 | 36 | A:1                     | G:0           |     |  |
| chr28                                 | 9061900 | 2 | 40 | C:1                     | T:0           |     |  |
| chr28                                 | 9062033 | 2 | 36 | TCGCTCACA:1             | T:0           |     |  |
| chr28                                 | 9062147 | 2 | 38 | G:1                     | A:0           |     |  |
| chr28                                 | 9062361 | 3 | 30 | TGG:0.833333            | T:0           | TG: |  |
| 0.166667                              |         |   |    |                         |               |     |  |
| chr28                                 | 9063282 | 2 | 16 | AC:0.9375               | A:0.0625      |     |  |
| chr28                                 | 9063400 | 2 | 26 | G:0.153846              | C:0.846154    |     |  |
| chr28                                 | 9064386 | 2 | 34 | C:0.941176              | CTT:0.0588235 |     |  |
| chr28                                 | 9064472 | 2 | 38 | G:0.868421              | GC:0.131579   |     |  |

|       |         |   |    |                                                 |                |
|-------|---------|---|----|-------------------------------------------------|----------------|
| chr28 | 9064477 | 2 | 38 | G:0.868421                                      | C:0.131579     |
| chr28 | 9064668 | 2 | 38 | G:1 T:0                                         |                |
| chr28 | 9065709 | 2 | 38 | GA:0.973684                                     | G:0.0263158    |
| chr28 | 9066664 | 2 | 36 | G:0.805556                                      | A:0.194444     |
| chr28 | 9066770 | 2 | 38 | A:1 G:0                                         |                |
| chr28 | 9067055 | 2 | 38 | G:1 A:0                                         |                |
| chr28 | 9068116 | 2 | 38 | A:0.368421                                      | AAAAG:0.631579 |
| chr28 | 9068122 | 2 | 38 | A:1 AAGAAAG:0                                   |                |
| chr28 | 9068140 | 2 | 38 | G:1 A:0                                         |                |
| chr28 | 9068147 | 2 | 38 | A:1 AAAG:0                                      |                |
| chr28 | 9068158 | 3 | 38 | G:0.526316                                      | GAAGA:0.236842 |
|       |         |   |    | GGAAGAAAGAAAGAAAGGAAGGAAGAAAGAAAGAAAGA:0.236842 |                |
| chr28 | 9068456 | 2 | 38 | C:1 T:0                                         |                |
| chr28 | 9068849 | 2 | 40 | T:0.975 TAAAAA:0.025                            |                |
| chr28 | 9068872 | 2 | 38 | GGAATA:1 G:0                                    |                |
| chr28 | 9069173 | 2 | 36 | G:1 A:0                                         |                |
| chr28 | 9069266 | 2 | 36 | A:1 G:0                                         |                |
| chr28 | 9069399 | 2 | 28 | C:0.785714                                      | CA:0.214286    |
| chr28 | 9069746 | 2 | 34 | T:1 C:0                                         |                |
| chr28 | 9070332 | 2 | 36 | A:1 AGT:0                                       |                |
| chr28 | 9071571 | 2 | 38 | G:1 T:0                                         |                |
| chr28 | 9071574 | 2 | 38 | G:1 T:0                                         |                |
| chr28 | 9071694 | 2 | 36 | A:1 G:0                                         |                |
| chr28 | 9071730 | 2 | 34 | G:0.441176                                      | T:0.558824     |
| chr28 | 9072256 | 2 | 34 | T:1 A:0                                         |                |
| chr28 | 9073177 | 3 | 40 | TAA:0.225                                       | T:0 TA:0.775   |
| chr28 | 9073184 | 2 | 40 | A:0.9 T:0.1                                     |                |
| chr28 | 9073654 | 2 | 38 | T:1 G:0                                         |                |
| chr28 | 9073869 | 2 | 34 | T:1 C:0                                         |                |
| chr28 | 9073993 | 2 | 36 | A:0.777778                                      | AT:0.222222    |
| chr28 | 9073995 | 2 | 36 | A:0.777778                                      | T:0.222222     |
| chr28 | 9074033 | 2 | 38 | CAGATAGAG:0.789474                              | C:             |
|       |         |   |    | 0.210526                                        |                |
| chr28 | 9074037 | 3 | 38 | TAGAGAG:0.815789                                | T:0 TAGAG:     |
|       |         |   |    | 0.184211                                        |                |
| chr28 | 9074750 | 2 | 38 | TA:0.789474                                     | T:0.210526     |
| chr28 | 9075130 | 2 | 36 | C:0.75 T:0.25                                   |                |
| chr28 | 9075511 | 2 | 40 | CT:0.775 C:0.225                                |                |
| chr28 | 9075676 | 2 | 38 | A:0.815789                                      | G:0.184211     |
| chr28 | 9075684 | 2 | 38 | T:0.815789                                      | A:0.184211     |
| chr28 | 9076002 | 2 | 32 | C:1 T:0                                         |                |
| chr28 | 9076092 | 2 | 38 | G:0.736842                                      | C:0.263158     |
| chr28 | 9076158 | 2 | 36 | T:0.805556                                      | C:0.194444     |
| chr28 | 9076182 | 2 | 36 | T:0.805556                                      | C:0.194444     |
| chr28 | 9076673 | 2 | 40 | CA:0.775 C:0.225                                |                |
| chr28 | 9076764 | 2 | 38 | T:0.5 C:0.5                                     |                |
| chr28 | 9076812 | 2 | 32 | G:0.75 T:0.25                                   |                |
| chr28 | 9076821 | 2 | 32 | T:0.75 G:0.25                                   |                |
| chr28 | 9076835 | 2 | 32 | G:0.75 T:0.25                                   |                |
| chr28 | 9076846 | 2 | 32 | C:0.75 T:0.25                                   |                |
| chr28 | 9076857 | 2 | 32 | A:0.75 T:0.25                                   |                |
| chr28 | 9076902 | 2 | 34 | T:0.764706                                      | C:0.235294     |
| chr28 | 9076908 | 2 | 34 | T:0.764706                                      | C:0.235294     |
| chr28 | 9076958 | 3 | 34 | TA:0.588235                                     | T:0.176471     |

TAA:0.235294

|                 |         |   |    |                  |                  |
|-----------------|---------|---|----|------------------|------------------|
| chr28           | 9077225 | 2 | 36 | C:0.805556       | T:0.194444       |
| chr28           | 9077262 | 2 | 34 | T:0.823529       | A:0.176471       |
| chr28           | 9077365 | 2 | 38 | A:0.710526       | G:0.289474       |
| chr28           | 9077504 | 2 | 40 | C:0.825 T:0.175  |                  |
| chr28           | 9077715 | 2 | 38 | T:0.868421       | C:0.131579       |
| chr28           | 9077725 | 3 | 38 | C:0.868421       | CTTT:0.105263    |
| CTTTT:0.0263158 |         |   |    |                  |                  |
| chr28           | 9078016 | 2 | 36 | GCAGT:0.888889   | G:0.111111       |
| chr28           | 9078201 | 2 | 38 | C:0.789474       | T:0.210526       |
| chr28           | 9078207 | 2 | 38 | A:0.789474       | G:0.210526       |
| chr28           | 9078254 | 2 | 38 | T:0.815789       | G:0.184211       |
| chr28           | 9078267 | 2 | 38 | C:0.789474       | A:0.210526       |
| chr28           | 9078294 | 2 | 38 | A:0.763158       | G:0.236842       |
| chr28           | 9078307 | 2 | 38 | T:0.763158       | TG:0.236842      |
| chr28           | 9078314 | 2 | 38 | G:0.763158       | A:0.236842       |
| chr28           | 9078760 | 2 | 34 | C:0.235294       | CT:0.764706      |
| chr28           | 9079172 | 2 | 38 | A:0.815789       | G:0.184211       |
| chr28           | 9079178 | 2 | 38 | G:0.815789       | A:0.184211       |
| chr28           | 9079196 | 2 | 38 | A:0.815789       | G:0.184211       |
| chr28           | 9079218 | 2 | 38 | A:0.815789       | G:0.184211       |
| chr28           | 9079312 | 2 | 36 | C:0.75 T:0.25    |                  |
| chr28           | 9079313 | 2 | 36 | CT:0.75 C:0.25   |                  |
| chr28           | 9079508 | 2 | 34 | C:0.941176       | T:0.0588235      |
| chr28           | 9079509 | 2 | 34 | A:0.941176       | G:0.0588235      |
| chr28           | 9079784 | 2 | 38 | C:1 CT:0         |                  |
| chr28           | 9080212 | 2 | 36 | G:1 GCC:0        |                  |
| chr28           | 9080216 | 2 | 36 | C:1 CGA:0        |                  |
| chr28           | 9080219 | 2 | 36 | T:0.833333       | G:0.166667       |
| chr28           | 9080220 | 2 | 36 | C:0.833333       | A:0.166667       |
| chr28           | 9080303 | 2 | 38 | G:0.815789       | A:0.184211       |
| chr28           | 9080344 | 2 | 34 | C:1 T:0          |                  |
| chr28           | 9080453 | 2 | 36 | T:0.805556       | C:0.194444       |
| chr28           | 9080484 | 2 | 32 | T:0.875 TA:0.125 |                  |
| chr28           | 9080539 | 2 | 36 | G:0.777778       | A:0.222222       |
| chr28           | 9081156 | 2 | 26 | C:0.692308       | CT:0.307692      |
| chr28           | 9081540 | 2 | 40 | A:0.75 C:0.25    |                  |
| chr28           | 9081732 | 2 | 34 | C:0.911765       | A:0.0882353      |
| chr28           | 9082462 | 2 | 34 | C:0.735294       | CT:0.264706      |
| chr28           | 9082581 | 2 | 38 | G:0.736842       | A:0.263158       |
| chr28           | 9082712 | 2 | 36 | CAA:0.805556     | C:0.194444       |
| chr28           | 9082716 | 2 | 36 | T:0.805556       | C:0.194444       |
| chr28           | 9082732 | 2 | 36 | C:0.805556       | CTT:0.194444     |
| chr28           | 9082740 | 2 | 36 | C:0.0277778      | T:0.972222       |
| chr28           | 9083013 | 2 | 34 | A:0.735294       | G:0.264706       |
| chr28           | 9083057 | 2 | 36 | T:0.777778       | C:0.222222       |
| chr28           | 9083137 | 2 | 36 | C:0.805556       | T:0.194444       |
| chr28           | 9083675 | 2 | 38 | CT:0.973684      | C:0.0263158      |
| chr28           | 9084375 | 2 | 38 | CCT:0.789474     | C:0.210526       |
| chr28           | 9084629 | 2 | 36 | G:0.805556       | C:0.194444       |
| chr28           | 9084938 | 2 | 36 | G:0.833333       | A:0.166667       |
| chr28           | 9085196 | 2 | 36 | G:0.805556       | T:0.194444       |
| chr28           | 9085578 | 2 | 34 | G:0.852941       | GCTCTCT:0.147059 |
| chr28           | 9085618 | 2 | 36 | T:0.861111       | A:0.138889       |

|               |         |   |    |                          |              |
|---------------|---------|---|----|--------------------------|--------------|
| chr28         | 9086088 | 2 | 34 | CTT:0.794118             | C:0.205882   |
| chr28         | 9086258 | 2 | 36 | G:0.777778               | C:0.222222   |
| chr28         | 9086297 | 2 | 36 | CTTTATA:0.75             | C:0.25       |
| chr28         | 9086512 | 2 | 40 | T:1 C:0                  |              |
| chr28         | 9086603 | 2 | 40 | T:1 C:0                  |              |
| chr28         | 9086707 | 2 | 38 | C:0.736842               | G:0.263158   |
| chr28         | 9086913 | 2 | 34 | T:0.852941               | C:0.147059   |
| chr28         | 9087018 | 2 | 36 | A:0.0277778              | C:0.972222   |
| chr28         | 9087957 | 2 | 38 | A:0.815789               | G:0.184211   |
| chr28         | 9088172 | 3 | 34 | TA:0.764706              | T:0.147059   |
| TAA:0.0882353 |         |   |    |                          |              |
| chr28         | 9088444 | 2 | 38 | TAGCTA:0.815789          | T:0.184211   |
| chr28         | 9088609 | 2 | 34 | T:0.735294               | TAA:0.264706 |
| chr28         | 9088684 | 2 | 36 | T:0.805556               | C:0.194444   |
| chr28         | 9088799 | 2 | 32 | T:0.71875                | TAA:0.28125  |
| chr28         | 9088927 | 2 | 34 | C:1 G:0                  |              |
| chr28         | 9089022 | 2 | 28 | C:0.75 A:0.25            |              |
| chr28         | 9089105 | 2 | 38 | C:1 T:0                  |              |
| chr28         | 9089203 | 2 | 38 | T:0.815789               | A:0.184211   |
| chr28         | 9089232 | 2 | 38 | C:1 CAGAGAG:0            |              |
| chr28         | 9089415 | 2 | 38 | C:1 T:0                  |              |
| chr28         | 9090136 | 2 | 40 | G:1 A:0                  |              |
| chr28         | 9090764 | 2 | 34 | A:1 C:0                  |              |
| chr28         | 9090988 | 2 | 34 | A:0.705882               | G:0.294118   |
| chr28         | 9091191 | 2 | 38 | C:1 T:0                  |              |
| chr28         | 9091307 | 2 | 36 | C:1 T:0                  |              |
| chr28         | 9091652 | 2 | 34 | C:0.852941               | T:0.147059   |
| chr28         | 9091771 | 2 | 40 | GT:1 G:0                 |              |
| chr28         | 9091923 | 2 | 38 | G:0.710526               | A:0.289474   |
| chr28         | 9092080 | 2 | 40 | C:1 G:0                  |              |
| chr28         | 9092223 | 2 | 38 | C:0.815789               | T:0.184211   |
| chr28         | 9092909 | 2 | 32 | CT:0.8125                | C:0.1875     |
| chr28         | 9093041 | 2 | 40 | C:0.8 T:0.2              |              |
| chr28         | 9093112 | 2 | 32 | G:0.75 A:0.25            |              |
| chr28         | 9093187 | 2 | 38 | CCT:0.736842             | C:0.263158   |
| chr28         | 9093590 | 2 | 32 | CCT:0.71875              | C:0.28125    |
| chr28         | 9093627 | 2 | 30 | TAAAA:0.966667           | T:0.0333333  |
| chr28         | 9093630 | 2 | 34 | A:1 AT:0                 |              |
| chr28         | 9093633 | 2 | 34 | A:1 AT:0                 |              |
| chr28         | 9093635 | 2 | 30 | A:0.966667               | T:0.0333333  |
| chr28         | 9093641 | 2 | 34 | A:1 T:0                  |              |
| chr28         | 9094162 | 2 | 40 | A:0.825 G:0.175          |              |
| chr28         | 9094920 | 2 | 36 | T:0.722222               | G:0.277778   |
| chr28         | 9095328 | 2 | 32 | G:1 A:0                  |              |
| chr28         | 9095562 | 2 | 40 | CTCTG:0.75               | C:0.25       |
| chr28         | 9095605 | 3 | 40 | AG:0.725 A:0.275         | AGG:0        |
| chr28         | 9095719 | 2 | 28 | G:1 A:0                  |              |
| chr28         | 9095822 | 2 | 38 | G:0.868421               | T:0.131579   |
| chr28         | 9096051 | 2 | 38 | A:0.842105               | G:0.157895   |
| chr28         | 9096278 | 2 | 34 | T:1 G:0                  |              |
| chr28         | 9096366 | 2 | 36 | TAC:0.833333             | T:0.166667   |
| chr28         | 9096449 | 2 | 36 | C:1 G:0                  |              |
| chr28         | 9096503 | 2 | 40 | C:0.6 CTTTTTTTTTTTTT:0.4 |              |
| chr28         | 9096636 | 2 | 36 | T:1 C:0                  |              |



|                 |         |   |    |                         |               |                 |
|-----------------|---------|---|----|-------------------------|---------------|-----------------|
| chr28           | 9097105 | 2 | 40 | C:0.825                 | T:0.175       |                 |
| chr28           | 9097982 | 2 | 40 | C:0.825                 | T:0.175       |                 |
| chr28           | 9098466 | 2 | 38 | T:1                     | A:0           |                 |
| chr28           | 9098761 | 2 | 38 | AC:0.815789             |               | A:0.184211      |
| chr28           | 9099002 | 2 | 38 | C:1                     | T:0           |                 |
| chr28           | 9099249 | 2 | 38 | T:0.763158              |               | C:0.236842      |
| chr28           | 9099266 | 2 | 32 | G:1                     | T:0           |                 |
| chr28           | 9099550 | 2 | 34 | T:1                     | TAA:0         |                 |
| chr28           | 9099640 | 2 | 30 | A:0.966667              |               | C:0.0333333     |
| chr28           | 9100002 | 2 | 36 | G:1                     | A:0           |                 |
| chr28           | 9100006 | 2 | 36 | C:1                     | T:0           |                 |
| chr28           | 9100067 | 2 | 36 | TTCTC:0.916667          |               | T:0.0833333     |
| chr28           | 9100103 | 2 | 36 | GA:1                    | G:0           |                 |
| chr28           | 9100185 | 2 | 40 | G:0.825                 | C:0.175       |                 |
| chr28           | 9100333 | 2 | 30 | T:1                     | C:0           |                 |
| chr28           | 9100450 | 3 | 40 | C:0.825                 | CTCTG:0.175   |                 |
| CTCTCTCTCTCTG:0 |         |   |    |                         |               |                 |
| chr28           | 9100716 | 2 | 36 | C:1                     | A:0           |                 |
| chr28           | 9100869 | 2 | 34 | C:1                     | T:0           |                 |
| chr28           | 9101114 | 2 | 36 | T:1                     | C:0           |                 |
| chr28           | 9101296 | 2 | 36 | C:0.694444              |               | G:0.305556      |
| chr28           | 9102150 | 2 | 34 | A:1                     | G:0           |                 |
| chr28           | 9102269 | 2 | 38 | G:1                     | C:0           |                 |
| chr28           | 9102282 | 2 | 36 | A:1                     | G:0           |                 |
| chr28           | 9102285 | 2 | 36 | G:1                     | C:0           |                 |
| chr28           | 9102675 | 2 | 32 | CCTGT:1                 | C:0           |                 |
| chr28           | 9103023 | 2 | 32 | C:1                     | T:0           |                 |
| chr28           | 9103084 | 2 | 38 | T:0.815789              |               | A:0.184211      |
| chr28           | 9103085 | 2 | 38 | T:0.815789              |               | A:0.184211      |
| chr28           | 9103207 | 2 | 34 | T:1                     | C:0           |                 |
| chr28           | 9103230 | 2 | 32 | T:0                     | C:1           |                 |
| chr28           | 9103393 | 2 | 40 | T:1                     | C:0           |                 |
| chr28           | 9103559 | 2 | 32 | G:1                     | A:0           |                 |
| chr28           | 9104029 | 2 | 38 | A:1                     | G:0           |                 |
| chr28           | 9104106 | 2 | 34 | C:1                     | G:0           |                 |
| chr28           | 9104152 | 2 | 38 | TAAC:0.789474           |               | T:0.210526      |
| chr28           | 9104461 | 2 | 36 | T:0.972222              |               | TA:0.0277778    |
| chr28           | 9104565 | 2 | 34 | CAATT:0.970588          |               | C:0.0294118     |
| chr28           | 9104842 | 2 | 36 | C:1                     | CTTTCTTTTCT:0 |                 |
| chr28           | 9104935 | 2 | 38 | A:1                     | G:0           |                 |
| chr28           | 9105010 | 2 | 38 | CTTTTTTTTGTTTT:0.736842 |               | C:<br>0.263158  |
| chr28           | 9105019 | 2 | 38 | GT:0.815789             |               | G:0.184211      |
| chr28           | 9105026 | 2 | 38 | T:1                     | G:0           |                 |
| chr28           | 9105332 | 2 | 38 | C:1                     | G:0           |                 |
| chr28           | 9105405 | 2 | 38 | G:0.763158              |               | A:0.236842      |
| chr28           | 9105780 | 2 | 36 | G:1                     | A:0           |                 |
| chr28           | 9106125 | 2 | 38 | TCTTTCCC:0.921053       |               | T:<br>0.0789474 |
| chr28           | 9106133 | 2 | 38 | A:0.921053              |               | AGGT:0.0789474  |
| chr28           | 9106477 | 2 | 36 | A:1                     | G:0           |                 |
| chr28           | 9106924 | 2 | 36 | G:0.777778              |               | A:0.222222      |
| chr28           | 9107300 | 2 | 36 | G:1                     | A:0           |                 |
| chr28           | 9107320 | 2 | 34 | C:1                     | T:0           |                 |

|       |         |   |    |                 |                      |
|-------|---------|---|----|-----------------|----------------------|
| chr28 | 9107462 | 2 | 38 | G:0.868421      | C:0.131579           |
| chr28 | 9107744 | 2 | 40 | C:0.85 T:0.15   |                      |
| chr28 | 9108048 | 2 | 36 | A:1 G:0         |                      |
| chr28 | 9108085 | 2 | 36 | G:0.805556      | A:0.194444           |
| chr28 | 9108126 | 2 | 40 | T:1 C:0         |                      |
| chr28 | 9108519 | 2 | 32 | CTTT:1 C:0      |                      |
| chr28 | 9108535 | 2 | 32 | T:0.96875       | A:0.03125            |
| chr28 | 9108685 | 2 | 40 | GAA:1 G:0       |                      |
| chr28 | 9108720 | 2 | 40 | T:1 C:0         |                      |
| chr28 | 9108873 | 2 | 36 | C:1 T:0         |                      |
| chr28 | 9108950 | 2 | 32 | C:1 A:0         |                      |
| chr28 | 9108980 | 2 | 38 | AAAAAG:0.947368 | A:0.0526316          |
| chr28 | 9109317 | 2 | 36 | T:1 A:0         |                      |
| chr28 | 9109371 | 2 | 36 | A:1 G:0         |                      |
| chr28 | 9109634 | 2 | 36 | A:1 G:0         |                      |
| chr28 | 9109805 | 2 | 36 | C:1 T:0         |                      |
| chr28 | 9110262 | 2 | 38 | A:1 G:0         |                      |
| chr28 | 9110338 | 2 | 38 | G:1 A:0         |                      |
| chr28 | 9110411 | 2 | 36 | G:1 A:0         |                      |
| chr28 | 9110488 | 2 | 38 | T:1 C:0         |                      |
| chr28 | 9110514 | 3 | 36 | TA:0.833333     | T:0 TAA:<br>0.166667 |
| chr28 | 9110601 | 2 | 34 | GA:1 G:0        |                      |
| chr28 | 9110604 | 2 | 34 | GT:1 G:0        |                      |
| chr28 | 9110928 | 2 | 38 | A:0.815789      | G:0.184211           |
| chr28 | 9111013 | 2 | 40 | G:1 A:0         |                      |
| chr28 | 9111170 | 2 | 38 | A:1 C:0         |                      |
| chr28 | 9111254 | 2 | 36 | G:1 GT:0        |                      |
| chr28 | 9111556 | 2 | 38 | C:0.815789      | G:0.184211           |
| chr28 | 9111695 | 2 | 34 | A:1 G:0         |                      |
| chr28 | 9112237 | 2 | 40 | G:1 A:0         |                      |
| chr28 | 9113042 | 2 | 36 | G:1 A:0         |                      |
| chr28 | 9113206 | 2 | 38 | C:0.815789      | G:0.184211           |
| chr28 | 9113447 | 2 | 40 | TTTA:1 T:0      |                      |
| chr28 | 9113448 | 2 | 40 | TTA:1 T:0       |                      |
| chr28 | 9113458 | 2 | 40 | TTTTA:1 T:0     |                      |
| chr28 | 9113486 | 2 | 34 | C:1 CAG:0       |                      |
| chr28 | 9113601 | 2 | 34 | C:1 A:0         |                      |
| chr28 | 9113608 | 2 | 34 | T:0.852941      | C:0.147059           |
| chr28 | 9113777 | 2 | 38 | TG:1 T:0        |                      |
| chr28 | 9113925 | 2 | 32 | TA:1 T:0        |                      |
| chr28 | 9114091 | 2 | 36 | G:0.805556      | C:0.194444           |
| chr28 | 9114192 | 2 | 40 | C:1 A:0         |                      |
| chr28 | 9114394 | 2 | 38 | T:0.789474      | A:0.210526           |
| chr28 | 9114401 | 2 | 38 | C:1 CAA:0       |                      |
| chr28 | 9114999 | 2 | 34 | C:1 T:0         |                      |
| chr28 | 9115428 | 2 | 34 | C:1 T:0         |                      |
| chr28 | 9115456 | 2 | 38 | A:1 G:0         |                      |
| chr28 | 9115654 | 2 | 40 | A:1 G:0         |                      |
| chr28 | 9115933 | 2 | 36 | G:0.805556      | GTTGT:0.194444       |
| chr28 | 9116460 | 2 | 38 | C:1 T:0         |                      |
| chr28 | 9117028 | 2 | 36 | T:0.777778      | A:0.222222           |
| chr28 | 9117210 | 2 | 38 | T:0.789474      | C:0.210526           |
| chr28 | 9117252 | 2 | 40 | A:0.775 G:0.225 |                      |

|              |         |   |    |                                |         |              |
|--------------|---------|---|----|--------------------------------|---------|--------------|
| chr28        | 9117980 | 2 | 38 | A:1                            | T:0     |              |
| chr28        | 9117981 | 3 | 38 | AAG:1                          | A:0     | GAG:0        |
| chr28        | 9118004 | 2 | 38 | C:1                            | T:0     |              |
| chr28        | 9118072 | 2 | 34 | GAAA:1                         | G:0     |              |
| chr28        | 9118145 | 2 | 40 | C:1                            | T:0     |              |
| chr28        | 9118226 | 2 | 40 | T:1                            | C:0     |              |
| chr28        | 9118408 | 2 | 36 | T:0.861111                     |         | C:0.138889   |
| chr28        | 9118672 | 2 | 40 | T:1                            | A:0     |              |
| chr28        | 9118674 | 2 | 40 | C:1                            | A:0     |              |
| chr28        | 9118781 | 3 | 36 | CT:0.472222                    |         | C:0.277778   |
| CTT:0.25     |         |   |    |                                |         |              |
| chr28        | 9118803 | 2 | 36 | TTTTA:0.805556                 |         | T:0.194444   |
| chr28        | 9119002 | 2 | 36 | G:1                            | T:0     |              |
| chr28        | 9119203 | 2 | 36 | G:1                            | A:0     |              |
| chr28        | 9119345 | 3 | 32 | TA:0.4375                      |         | T:0.34375    |
| TAAA:0.21875 |         |   |    |                                |         |              |
| chr28        | 9119362 | 2 | 36 | A:1                            | AT:0    |              |
| chr28        | 9119470 | 2 | 40 | T:1                            | A:0     |              |
| chr28        | 9119870 | 3 | 40 | AT:0.825                       | A:0.025 | ATGTTTT:0.15 |
| chr28        | 9120006 | 2 | 34 | G:1                            | A:0     |              |
| chr28        | 9120038 | 2 | 38 | A:0.789474                     |         | G:0.210526   |
| chr28        | 9120081 | 2 | 38 | C:1                            | T:0     |              |
| chr28        | 9120109 | 2 | 38 | C:0.815789                     |         | T:0.184211   |
| chr28        | 9120303 | 2 | 32 | C:1                            | T:0     |              |
| chr28        | 9120801 | 2 | 36 | C:0.722222                     |         | T:0.277778   |
| chr28        | 9121069 | 2 | 36 | G:1                            | A:0     |              |
| chr28        | 9121180 | 2 | 36 | C:0.972222                     |         | CT:0.0277778 |
| chr28        | 9121516 | 2 | 40 | A:0.75                         | G:0.25  |              |
| chr28        | 9122021 | 2 | 40 | AGGACATTTGGGCAGTGATGTTTTT:0.75 |         |              |
| A:0.25       |         |   |    |                                |         |              |
| chr28        | 9122067 | 2 | 36 | T:1                            | TA:0    |              |
| chr28        | 9122560 | 2 | 32 | C:0.75                         | T:0.25  |              |
| chr28        | 9122818 | 2 | 32 | G:1                            | A:0     |              |
| chr28        | 9122925 | 2 | 40 | A:1                            | C:0     |              |
| chr28        | 9123875 | 2 | 40 | C:1                            | T:0     |              |
| chr28        | 9123928 | 2 | 36 | C:1                            | T:0     |              |
| chr28        | 9123957 | 2 | 38 | T:0.763158                     |         | C:0.236842   |
| chr28        | 9124006 | 2 | 38 | CCTCTCTCT:0.947368             |         | C:           |
| 0.0526316    |         |   |    |                                |         |              |
| chr28        | 9124042 | 2 | 38 | A:1                            | T:0     |              |
| chr28        | 9124060 | 2 | 38 | A:1                            | C:0     |              |
| chr28        | 9124061 | 2 | 38 | C:1                            | A:0     |              |
| chr28        | 9124281 | 2 | 34 | T:1                            | C:0     |              |
| chr28        | 9124572 | 2 | 34 | T:1                            | TC:0    |              |
| chr28        | 9124752 | 2 | 34 | T:1                            | C:0     |              |
| chr28        | 9124828 | 3 | 26 | CT:0.384615                    |         | C:0.0384615  |
| CTT:0.576923 |         |   |    |                                |         |              |
| chr28        | 9124843 | 2 | 32 | T:1                            | A:0     |              |
| chr28        | 9124899 | 2 | 28 | C:1                            | G:0     |              |
| chr28        | 9124901 | 2 | 28 | C:1                            | G:0     |              |
| chr28        | 9124972 | 2 | 36 | G:1                            | A:0     |              |
| chr28        | 9124982 | 2 | 36 | G:1                            | A:0     |              |
| chr28        | 9125096 | 2 | 38 | A:1                            | G:0     |              |
| chr28        | 9126738 | 2 | 36 | T:1                            | C:0     |              |

|                     |         |   |    |                 |                |  |
|---------------------|---------|---|----|-----------------|----------------|--|
| chr28               | 9127083 | 2 | 38 | C:1             | T:0            |  |
| chr28               | 9127129 | 2 | 38 | CCTCT:1         | C:0            |  |
| chr28               | 9127181 | 2 | 34 | TTAAAA:0.911765 | T:0.0882353    |  |
| chr28               | 9127226 | 2 | 38 | A:1             | C:0            |  |
| chr28               | 9127250 | 2 | 38 | G:1             | GA:0           |  |
| chr28               | 9127363 | 2 | 38 | T:1             | A:0            |  |
| chr28               | 9127803 | 2 | 36 | T:1             | TA:0           |  |
| chr28               | 9127952 | 2 | 38 | A:1             | G:0            |  |
| chr28               | 9128086 | 2 | 38 | T:0.842105      | C:0.157895     |  |
| chr28               | 9128585 | 2 | 34 | G:1             | T:0            |  |
| chr28               | 9128938 | 2 | 34 | T:1             | C:0            |  |
| chr28               | 9129276 | 2 | 34 | C:1             | T:0            |  |
| chr28               | 9129297 | 2 | 36 | C:1             | A:0            |  |
| chr28               | 9129460 | 2 | 38 | A:1             | G:0            |  |
| chr28               | 9129912 | 2 | 34 | T:1             | C:0            |  |
| chr28               | 9129963 | 2 | 38 | C:0.763158      | T:0.236842     |  |
| chr28               | 9129964 | 2 | 38 | A:0.763158      | G:0.236842     |  |
| chr28               | 9130261 | 2 | 38 | T:1             | C:0            |  |
| chr28               | 9130795 | 2 | 36 | C:0.777778      | T:0.222222     |  |
| chr28               | 9130813 | 2 | 38 | T:0.815789      | C:0.184211     |  |
| chr28               | 9130936 | 2 | 38 | T:1             | C:0            |  |
| chr28               | 9130939 | 2 | 38 | A:1             | G:0            |  |
| chr28               | 9131645 | 2 | 18 | G:0.388889      | A:0.611111     |  |
| chr28               | 9132326 | 2 | 24 | T:0.75          | C:0.25         |  |
| chr28               | 9132540 | 2 | 34 | T:0.794118      | C:0.205882     |  |
| chr28               | 9134968 | 2 | 34 | C:1             | T:0            |  |
| chr28               | 9135012 | 2 | 22 | TA:0.772727     | T:0.227273     |  |
| chr28               | 9135153 | 2 | 34 | C:1             | T:0            |  |
| chr28               | 9135492 | 3 | 30 | TA:0.533333     | T:0.266667     |  |
| TAAA:0.2            |         |   |    |                 |                |  |
| chr28               | 9135625 | 2 | 40 | T:1             | A:0            |  |
| chr28               | 9136723 | 2 | 38 | CAT:1           | C:0            |  |
| chr28               | 9136768 | 2 | 36 | T:1             | G:0            |  |
| chr28               | 9136846 | 2 | 36 | A:1             | T:0            |  |
| chr28               | 9136848 | 2 | 36 | G:1             | T:0            |  |
| chr28               | 9136969 | 2 | 38 | G:1             | A:0            |  |
| chr28               | 9137075 | 2 | 34 | CT:0.941176     | C:0.0588235    |  |
| chr28               | 9137096 | 2 | 38 | TTTTA:0.736842  | T:0.263158     |  |
| chr28               | 9137144 | 2 | 34 | T:1             | C:0            |  |
| chr28               | 9137614 | 2 | 38 | A:1             | C:0            |  |
| chr28               | 9138170 | 3 | 38 | C:0.894737      | CCTCT:0.105263 |  |
| CCTCTCTCTCTCTCTCT:0 |         |   |    |                 |                |  |
| chr28               | 9138203 | 2 | 34 | GAATA:0.941176  | G:0.0588235    |  |
| chr28               | 9138235 | 2 | 32 | T:0.09375       | TA:0.90625     |  |
| chr28               | 9139044 | 2 | 36 | A:1             | G:0            |  |
| chr28               | 9139062 | 2 | 38 | C:0.789474      | CTTCT:0.210526 |  |
| chr28               | 9139324 | 2 | 34 | C:1             | CACAGAGAG:0    |  |
| chr28               | 9139613 | 2 | 32 | G:1             | C:0            |  |
| chr28               | 9139644 | 2 | 32 | G:1             | T:0            |  |
| chr28               | 9139804 | 2 | 32 | G:0.84375       | T:0.15625      |  |
| chr28               | 9139909 | 2 | 38 | C:1             | G:0            |  |
| chr28               | 9140077 | 2 | 36 | A:1             | T:0            |  |
| chr28               | 9140530 | 2 | 38 | G:0.710526      | C:0.289474     |  |
| chr28               | 9140720 | 2 | 36 | G:1             | A:0            |  |

|                     |         |   |    |                                |              |         |
|---------------------|---------|---|----|--------------------------------|--------------|---------|
| chr28               | 9140804 | 2 | 34 | C:1                            | CTG:0        |         |
| chr28               | 9141197 | 2 | 38 | T:1                            | TA:0         |         |
| chr28               | 9141271 | 2 | 36 | A:1                            | T:0          |         |
| chr28               | 9141396 | 2 | 36 | G:1                            | C:0          |         |
| chr28               | 9142392 | 2 | 36 | G:1                            | A:0          |         |
| chr28               | 9142600 | 2 | 34 | A:1                            | T:0          |         |
| chr28               | 9142635 | 2 | 36 | A:0.777778                     | AT:0.222222  |         |
| chr28               | 9142668 | 2 | 38 | TAGAC:0.973684                 | T:0.0263158  |         |
| chr28               | 9142680 | 3 | 40 | AAGAGAGAG:0.65                 | A:0.025      |         |
| AAGAGAGAGAG:0.325   |         |   |    |                                |              |         |
| chr28               | 9142841 | 3 | 30 | TCC:0.7                        | T:0.3        | TC:0    |
| chr28               | 9142881 | 2 | 34 | T:0.941176                     | TA:0.0588235 |         |
| chr28               | 9143006 | 2 | 36 | C:0.805556                     | T:0.194444   |         |
| chr28               | 9143377 | 3 | 34 | AT:0.705882                    | A:0.117647   |         |
| ATT:0.176471        |         |   |    |                                |              |         |
| chr28               | 9143426 | 2 | 32 | CAGAGAGAG:0.90625              | C:           |         |
| 0.09375             |         |   |    |                                |              |         |
| chr28               | 9143525 | 2 | 38 | A:0.789474                     | G:0.210526   |         |
| chr28               | 9143900 | 2 | 38 | TA:0.973684                    | T:0.0263158  |         |
| chr28               | 9144440 | 2 | 38 | G:0.815789                     | T:0.184211   |         |
| chr28               | 9144446 | 2 | 40 | G:1                            | A:0          |         |
| chr28               | 9144686 | 2 | 36 | A:1                            | T:0          |         |
| chr28               | 9145028 | 2 | 34 | TGAAATATCTGGAAAAAAAAAAAAAAAAA: |              |         |
| 0.823529 T:0.176471 |         |   |    |                                |              |         |
| chr28               | 9145032 | 2 | 34 | ATATC:1                        | A:0          |         |
| chr28               | 9145038 | 2 | 34 | GGAAAAAAAAAAAAAAAAAAGAAATA:1   | G:0          |         |
| chr28               | 9145148 | 2 | 30 | CT:0.5                         | C:0.5        |         |
| chr28               | 9145161 | 2 | 34 | T:0.735294                     | A:0.264706   |         |
| chr28               | 9145164 | 4 | 40 | GATTTATTT:0.65                 | G:0.2        | GATTT:0 |
| GATTTATTTATTT:0.15  |         |   |    |                                |              |         |
| chr28               | 9145226 | 2 | 40 | T:1                            | TGAGA:0      |         |
| chr28               | 9145643 | 2 | 38 | C:1                            | CAAGAT:0     |         |
| chr28               | 9145790 | 2 | 40 | CTCT:1                         | C:0          |         |
| chr28               | 9145810 | 2 | 40 | T:1                            | A:0          |         |
| chr28               | 9145957 | 2 | 38 | CACG:0.763158                  | C:0.236842   |         |
| chr28               | 9146538 | 2 | 36 | G:0.833333                     | A:0.166667   |         |
| chr28               | 9146594 | 2 | 38 | ATC:0.868421                   | A:0.131579   |         |
| chr28               | 9146977 | 2 | 28 | T:1                            | A:0          |         |
| chr28               | 9147023 | 2 | 34 | G:1                            | T:0          |         |
| chr28               | 9147135 | 2 | 38 | TC:0.789474                    | T:0.210526   |         |
| chr28               | 9147162 | 2 | 38 | T:1                            | C:0          |         |
| chr28               | 9147164 | 2 | 38 | T:1                            | C:0          |         |
| chr28               | 9147406 | 2 | 22 | A:1                            | G:0          |         |
| chr28               | 9149465 | 2 | 28 | TA:0.5                         | T:0.5        |         |
| chr28               | 9150836 | 2 | 32 | GT:0.875                       | G:0.125      |         |
| chr28               | 9153248 | 2 | 36 | C:1                            | T:0          |         |
| chr28               | 9157090 | 2 | 38 | GT:0.842105                    | G:0.157895   |         |
| chr28               | 9157133 | 2 | 34 | CAGAG:0.970588                 | C:0.0294118  |         |
| chr28               | 9158152 | 2 | 32 | AT:1                           | A:0          |         |
| chr28               | 9158201 | 2 | 30 | GGA:0.933333                   | G:0.0666667  |         |
| chr28               | 9158997 | 2 | 34 | TA:0.941176                    | T:0.0588235  |         |
| chr28               | 9159272 | 3 | 34 | AAG:0.941176                   | A:0.0588235  |         |
| AAGAGAG:0           |         |   |    |                                |              |         |
| chr28               | 9160165 | 2 | 36 | T:1                            | TA:0         |         |

|                             |         |   |    |                        |         |                |
|-----------------------------|---------|---|----|------------------------|---------|----------------|
| chr28                       | 9160327 | 2 | 30 | CTG:0.3                | C:0.7   |                |
| chr28                       | 9160429 | 2 | 38 | C:0.789474             |         | T:0.210526     |
| chr28                       | 9160757 | 2 | 36 | AC:1                   | A:0     |                |
| chr28                       | 9161374 | 2 | 34 | T:1                    | A:0     |                |
| chr28                       | 9161866 | 2 | 38 | C:1                    | T:0     |                |
| chr28                       | 9162302 | 2 | 38 | GGA:0.894737           |         | G:0.105263     |
| chr28                       | 9163197 | 2 | 36 | GA:0                   | G:1     |                |
| chr28                       | 9163247 | 2 | 32 | A:1                    | G:0     |                |
| chr28                       | 9164020 | 2 | 40 | C:1                    |         |                |
| CTTTGTTCTTCTTTTTTTTTTTTTT:0 |         |   |    |                        |         |                |
| chr28                       | 9164559 | 2 | 38 | G:1                    | GT:0    |                |
| chr28                       | 9164798 | 2 | 36 | TA:0.722222            |         | T:0.277778     |
| chr28                       | 9165080 | 3 | 38 | TA:0.868421            |         | T:0.131579     |
| AA:0                        |         |   |    |                        |         |                |
| chr28                       | 9165804 | 2 | 36 | T:0.777778             |         | C:0.222222     |
| chr28                       | 9166894 | 2 | 36 | C:0.833333             |         | CT:0.166667    |
| chr28                       | 9167364 | 2 | 32 | C:0.46875              |         | CT:0.53125     |
| chr28                       | 9167454 | 2 | 32 | C:1                    | T:0     |                |
| chr28                       | 9168441 | 2 | 26 | CAG:0.692308           |         | C:0.307692     |
| chr28                       | 9168549 | 2 | 30 | A:0.633333             |         | G:0.366667     |
| chr28                       | 9169426 | 2 | 40 | A:0.675                | G:0.325 |                |
| chr28                       | 9170031 | 2 | 38 | G:0.789474             |         | A:0.210526     |
| chr28                       | 9170724 | 2 | 36 | C:0.138889             |         | CAGAG:0.861111 |
| chr28                       | 9171159 | 2 | 40 | C:1                    | T:0     |                |
| chr28                       | 9175560 | 2 | 36 | T:1                    | C:0     |                |
| chr28                       | 9175795 | 2 | 32 | CT:0.96875             |         | C:0.03125      |
| chr28                       | 9178631 | 2 | 34 | T:0.911765             |         | C:0.0882353    |
| chr28                       | 9180681 | 2 | 32 | A:1                    | G:0     |                |
| chr28                       | 9180806 | 2 | 40 | C:1                    | T:0     |                |
| chr28                       | 9180948 | 2 | 32 | T:1                    | G:0     |                |
| chr28                       | 9181107 | 2 | 40 | C:0.85                 | T:0.15  |                |
| chr28                       | 9181265 | 2 | 36 | C:1                    | T:0     |                |
| chr28                       | 9184306 | 3 | 38 | CAG:0.684211           |         | C:0.0789474    |
| CAGAG:0.236842              |         |   |    |                        |         |                |
| chr28                       | 9187030 | 2 | 36 | CAAAT:0.527778         |         | C:0.472222     |
| chr28                       | 9187804 | 2 | 34 | G:0.794118             |         | A:0.205882     |
| chr28                       | 9188964 | 2 | 36 | T:1                    | C:0     |                |
| chr28                       | 9190252 | 2 | 34 | CT:0.941176            |         | C:0.0588235    |
| chr28                       | 9190810 | 2 | 36 | G:0.805556             |         | A:0.194444     |
| chr28                       | 9191746 | 2 | 36 | G:0                    | T:1     |                |
| chr28                       | 9194302 | 2 | 36 | C:0.972222             |         | T:0.0277778    |
| chr28                       | 9195381 | 2 | 38 | T:1                    | G:0     |                |
| chr28                       | 9195814 | 2 | 38 | G:1                    | A:0     |                |
| chr28                       | 9197247 | 2 | 38 | G:1                    | A:0     |                |
| chr28                       | 9200444 | 2 | 40 | G:1                    | A:0     |                |
| chr28                       | 9200919 | 2 | 32 | CT:0.6875              |         | C:0.3125       |
| chr28                       | 9202338 | 2 | 34 | C:0.676471             |         | T:0.323529     |
| chr28                       | 9202393 | 2 | 26 | AT:0.769231            |         | A:0.230769     |
| chr28                       | 9203008 | 4 | 40 | CTTCTTTCT:0.2          |         | C:0.175 CTTCT: |
| 0.2 CTTCTTTCTTTCT:0.425     |         |   |    |                        |         |                |
| chr28                       | 9203378 | 2 | 32 | GT:0.875               | G:0.125 |                |
| chr28                       | 9204202 | 2 | 34 | GAC:0.823529           |         | G:0.176471     |
| chr28                       | 9205805 | 2 | 40 | CTTCTTCTTCTTCTCT:0.975 |         | C:0.025        |
| chr28                       | 9205814 | 2 | 38 | CTTCTCT:0.973684       |         | C:0.0263158    |

|                |                      |   |    |                      |               |          |
|----------------|----------------------|---|----|----------------------|---------------|----------|
| chr28          | 9208416              | 2 | 36 | T:1                  | A:0           |          |
| chr28          | 9208559              | 2 | 28 | C:1                  | T:0           |          |
| chr28          | 9208833              | 2 | 36 | C:1                  | T:0           |          |
| chr28          | 9210336              | 2 | 34 | C:1                  | T:0           |          |
| chr28          | 9211793              | 2 | 24 | AC:0                 | A:1           |          |
| chr28          | 9214201              | 2 | 38 | G:0.684211           | A:0.315789    |          |
| chr28          | 9218725              | 2 | 36 | C:0.972222           | T:0.0277778   |          |
| chr28          | 9220104              | 2 | 32 | A:0.625              | AATTC:0.375   |          |
| chr28          | 9221330              | 2 | 26 | T:0.423077           | C:0.576923    |          |
| chr28          | 9222795              | 2 | 38 | C:1                  | T:0           |          |
| chr28          | 9224068              | 2 | 38 | G:0                  | A:1           |          |
| chr28          | 9224369              | 2 | 40 | A:0.675              | G:0.325       |          |
| chr28          | 9225820              | 2 | 36 | C:0.916667           | G:0.0833333   |          |
| chr28          | 9225982              | 2 | 36 | T:0.972222           | G:0.0277778   |          |
| chr28          | 9226256              | 2 | 34 | TCAA:0.705882        | T:0.294118    |          |
| chr28          | 9226379              | 2 | 38 | G:1                  | A:0           |          |
| chr28          | 9226462              | 2 | 36 | C:1                  | T:0           |          |
| chr28          | 9229209              | 2 | 32 | C:1                  | T:0           |          |
| chr28          | 9231342              | 3 | 34 | C:0.735294           | CT:0.264706   |          |
| CTT:0          |                      |   |    |                      |               |          |
| chr28          | 9234080              | 2 | 36 | C:1                  | T:0           |          |
| chr28          | 9235371              | 2 | 36 | G:0.694444           | A:0.305556    |          |
| chr28          | 9235627              | 2 | 38 | G:1                  | C:0           |          |
| chr28          | 9236536              | 3 | 34 | T:0.147059           | TTG:0.411765  |          |
| TTGTG:0.441176 |                      |   |    |                      |               |          |
| chr28          | 9241046              | 2 | 28 | T:0.964286           | TAC:0.0357143 |          |
| chr28          | 9241915              | 2 | 38 | G:1                  | T:0           |          |
| chr28          | 9242810              | 2 | 40 | C:1                  | T:0           |          |
| chr28          | 9245246              | 2 | 38 | G:1                  | A:0           |          |
| chr28          | 9245562              | 2 | 36 | C:0.972222           | CAG:0.0277778 |          |
| chr28          | 9245594              | 2 | 38 | GAAACATAGGC:0.921053 | G:            |          |
| 0.0789474      |                      |   |    |                      |               |          |
| chr28          | 9245609              | 2 | 38 | G:0.921053           | A:0.0789474   |          |
| chr28          | 9246068              | 3 | 28 | CT:0.678571          | C:0.142857    |          |
| CTT:0.178571   |                      |   |    |                      |               |          |
| chr28          | 9249971              | 2 | 36 | GA:0.833333          | G:0.166667    |          |
| chr28          | 9252355              | 2 | 32 | G:0.875              | GC:0.125      |          |
| chr28          | 9255857              | 2 | 36 | A:1                  | G:0           |          |
| chr28          | 9256832              | 2 | 28 | T:1                  | C:0           |          |
| chr28          | 9258279              | 2 | 32 | T:1                  | TTTTC:0       |          |
| chr28          | 9260451              | 2 | 36 | TA:0.805556          | T:0.194444    |          |
| chr28          | 9262984              | 2 | 36 | C:1                  | A:0           |          |
| chr28          | 9263081              | 2 | 38 | T:0.973684           | A:0.0263158   |          |
| chr28          | 9263695              | 2 | 38 | C:0                  | A:1           |          |
| chr28          | 9266238              | 4 | 40 | TAAATAAAATA:0.1      | T:0.5         | TAAATA:  |
| 0.2            | TAAATAAAATAAAATA:0.2 |   |    |                      |               |          |
| chr28          | 9266559              | 2 | 36 | C:1                  | T:0           |          |
| chr28          | 9268562              | 3 | 34 | T:0.882353           | TCA:0.117647  |          |
| TCACA:0        |                      |   |    |                      |               |          |
| chr28          | 9270413              | 2 | 34 | T:0.794118           | TA:0.205882   |          |
| chr28          | 9270532              | 2 | 34 | C:1                  | G:0           |          |
| chr28          | 9271166              | 3 | 40 | AAG:0.925            | A:0.075       | AAGAGAG: |
| 0              |                      |   |    |                      |               |          |
| chr28          | 9274164              | 2 | 38 | A:1                  | T:0           |          |

|                           |         |   |    |                      |             |  |
|---------------------------|---------|---|----|----------------------|-------------|--|
| chr28                     | 9274623 | 2 | 36 | G:1                  | A:0         |  |
| chr28                     | 9274782 | 3 | 34 | TTTTA:0.352941       | T:0.0588235 |  |
| TTTTATTTA:0.588235        |         |   |    |                      |             |  |
| chr28                     | 9276305 | 2 | 36 | G:1                  | A:0         |  |
| chr28                     | 9279792 | 3 | 36 | TTCTCTCTCTC:0.694444 | T:          |  |
| 0.138889 TTCTCTC:0.166667 |         |   |    |                      |             |  |
| chr28                     | 9279868 | 2 | 32 | A:1                  | T:0         |  |
| chr28                     | 9279890 | 2 | 34 | T:0.441176           | TA:0.558824 |  |
| chr28                     | 9282265 | 2 | 38 | C:1                  | T:0         |  |
| chr28                     | 9286422 | 2 | 36 | A:0.861111           | G:0.138889  |  |
| chr28                     | 9289479 | 2 | 36 | G:0                  | GT:1        |  |
| chr28                     | 9289501 | 2 | 36 | AG:0                 | A:1         |  |
| chr28                     | 9289508 | 2 | 36 | C:0                  | CA:1        |  |
| chr28                     | 9289522 | 2 | 34 | CT:0                 | C:1         |  |
| chr28                     | 9289527 | 2 | 34 | C:0                  | CA:1        |  |
| chr28                     | 9289532 | 2 | 34 | AT:0                 | A:1         |  |
| chr28                     | 9289540 | 2 | 32 | A:0                  | AC:1        |  |
| chr28                     | 9289550 | 2 | 32 | G:0                  | C:1         |  |
| chr28                     | 9289551 | 2 | 32 | C:0                  | T:1         |  |
| chr28                     | 9289563 | 2 | 32 | A:0                  | AT:1        |  |
| chr28                     | 9289582 | 2 | 34 | T:0                  | TTG:1       |  |
| chr28                     | 9289586 | 2 | 34 | A:0                  | AG:1        |  |
| chr28                     | 9289594 | 2 | 36 | A:0                  | AT:1        |  |
| chr28                     | 9289602 | 2 | 36 | C:0                  | CT:1        |  |
| chr28                     | 9289611 | 2 | 38 | C:0                  | CT:1        |  |
| chr28                     | 9289613 | 2 | 38 | A:0                  | T:1         |  |
| chr28                     | 9289628 | 2 | 38 | T:0                  | C:1         |  |
| chr28                     | 9289678 | 2 | 34 | G:0                  | GA:1        |  |
| chr28                     | 9289765 | 3 | 36 | GT:0.805556          | G:0.0833333 |  |
| GTT:0.111111              |         |   |    |                      |             |  |
| chr28                     | 9291028 | 2 | 32 | G:0.84375            | GA:0.15625  |  |
| chr28                     | 9292480 | 2 | 40 | A:0.875              | G:0.125     |  |
| chr28                     | 9292702 | 2 | 36 | A:1                  | AT:0        |  |
| chr28                     | 9293543 | 2 | 40 | A:1                  | T:0         |  |
| chr28                     | 9294590 | 2 | 36 | CT:0.805556          | C:0.194444  |  |
| chr28                     | 9295280 | 2 | 32 | C:1                  | CTGTG:0     |  |
| chr28                     | 9296459 | 2 | 38 | C:0.342105           | A:0.657895  |  |
| chr28                     | 9297124 | 2 | 38 | TG:0                 | T:1         |  |
| chr28                     | 9297705 | 2 | 32 | CT:0.71875           | C:0.28125   |  |
| chr28                     | 9297733 | 2 | 32 | T:0.78125            | A:0.21875   |  |
| chr28                     | 9297746 | 2 | 32 | T:1                  | G:0         |  |
| chr28                     | 9299280 | 2 | 28 | T:0.821429           | TA:0.178571 |  |
| chr28                     | 9302028 | 2 | 36 | G:1                  | A:0         |  |
| chr28                     | 9303306 | 2 | 38 | C:1                  | T:0         |  |
| chr28                     | 9307062 | 3 | 26 | TA:0.538462          | T:0.153846  |  |
| TAA:0.307692              |         |   |    |                      |             |  |
| chr28                     | 9307815 | 2 | 38 | C:1                  | T:0         |  |
| chr28                     | 9310023 | 3 | 38 | TA:0.921053          | T:0.0789474 |  |
| TAA:0                     |         |   |    |                      |             |  |
| chr28                     | 9310572 | 2 | 40 | G:1                  | A:0         |  |
| chr28                     | 9313118 | 2 | 36 | C:1                  | T:0         |  |
| chr28                     | 9313791 | 2 | 32 | TA:0.9375            | T:0.0625    |  |
| chr28                     | 9314189 | 2 | 34 | A:1                  | T:0         |  |
| chr28                     | 9314438 | 2 | 28 | CATATATATAT:0.285714 | C:          |  |



0.714286

|                   |                 |   |    |                        |                 |
|-------------------|-----------------|---|----|------------------------|-----------------|
| chr28             | 9315188         | 2 | 36 | AC:0.916667            | A:0.0833333     |
| chr28             | 9315208         | 2 | 38 | A:1 G:0                |                 |
| chr28             | 9318528         | 2 | 24 | TA:0.75 T:0.25         |                 |
| chr28             | 9320292         | 2 | 34 | G:1 A:0                |                 |
| chr28             | 9320305         | 2 | 38 | TG:0.973684            | T:0.0263158     |
| chr28             | 9320833         | 2 | 28 | G:0.964286             | GCA:0.0357143   |
| chr28             | 9322001         | 2 | 38 | A:1 G:0                |                 |
| chr28             | 9323951         | 2 | 36 | G:0 A:1                |                 |
| chr28             | 9325691         | 2 | 36 | A:1 G:0                |                 |
| chr28             | 9326224         | 2 | 40 | C:1 T:0                |                 |
| chr28             | 9330049         | 2 | 30 | CCT:0.933333           | C:0.0666667     |
| chr28             | 9330093         | 2 | 36 | TA:0.944444            | T:0.0555556     |
| chr28             | 9338162         | 2 | 36 | CT:0.75 C:0.25         |                 |
| chr28             | 9338671         | 2 | 36 | T:1 C:0                |                 |
| chr28             | 9339342         | 2 | 30 | T:0.366667             | C:0.633333      |
| chr28             | 9340687         | 2 | 40 | A:1 C:0                |                 |
| chr28             | 9342346         | 2 | 36 | CAGAG:1 C:0            |                 |
| chr28             | 9342381         | 2 | 36 | G:0.611111             | A:0.388889      |
| chr28             | 9344449         | 2 | 34 | T:1 G:0                |                 |
| chr28             | 9346223         | 2 | 36 | C:0.944444             | CAATA:0.0555556 |
| chr28             | 9346437         | 2 | 36 | GA:1 G:0               |                 |
| chr28             | 9347895         | 3 | 34 | T:0.176471             | TTTTA:0.705882  |
| TTTTATTA:0.117647 |                 |   |    |                        |                 |
| chr28             | 9349792         | 2 | 38 | T:1 C:0                |                 |
| chr28             | 9350405         | 2 | 38 | A:1 G:0                |                 |
| chr28             | 9351340         | 4 | 40 | TATAAATAA:0.1          | T:0.525 TATAA:  |
| 0.375             | TATAAATAAATAA:0 |   |    |                        |                 |
| chr28             | 9352037         | 2 | 36 | G:1 C:0                |                 |
| chr28             | 9355014         | 2 | 34 | CCT:0.970588           | C:0.0294118     |
| chr28             | 9356156         | 2 | 28 | TA:0.428571            | T:0.571429      |
| chr28             | 9356483         | 2 | 34 | CT:0.735294            | C:0.264706      |
| chr28             | 9357139         | 3 | 32 | AT:1 A:0               | ATT:0           |
| chr28             | 9357371         | 2 | 38 | C:0 A:1                |                 |
| chr28             | 9357778         | 2 | 36 | T:1 TA:0               |                 |
| chr28             | 9359170         | 2 | 38 | A:1 T:0                |                 |
| chr28             | 9359227         | 2 | 38 | GGCAGAGGGAGAA:0.947368 | G:              |
| 0.0526316         |                 |   |    |                        |                 |
| chr28             | 9359764         | 2 | 34 | TA:0.882353            | T:0.117647      |
| chr28             | 9360813         | 2 | 40 | C:0.8 T:0.2            |                 |
| chr28             | 9361289         | 2 | 34 | T:0.323529             | C:0.676471      |
| chr28             | 9361760         | 2 | 36 | CTG:0.944444           | C:0.0555556     |
| chr28             | 9361762         | 2 | 36 | G:0.583333             | C:0.416667      |
| chr28             | 9362169         | 2 | 38 | G:1 A:0                |                 |
| chr28             | 9363389         | 2 | 38 | T:0.973684             | G:0.0263158     |
| chr28             | 9363703         | 2 | 38 | AAAAGAAAG:1            | A:0             |
| chr28             | 9363721         | 3 | 40 | AAGAAAGAAAAG:0.8       | A:0             |
| AAAAGAAAAG:0.2    |                 |   |    |                        |                 |
| chr28             | 9363727         | 2 | 40 | GAA:0.975              | G:0.025         |
| chr28             | 9363729         | 2 | 40 | A:0.45 AAG:0.55        |                 |
| chr28             | 9364175         | 2 | 34 | T:1 C:0                |                 |
| chr28             | 9364724         | 2 | 38 | G:1 A:0                |                 |
| chr28             | 9365482         | 2 | 40 | CAA:1 C:0              |                 |
| chr28             | 9365955         | 2 | 36 | C:0 T:1                |                 |

|       |         |   |    |                     |         |              |
|-------|---------|---|----|---------------------|---------|--------------|
| chr28 | 9366573 | 2 | 38 | T:1                 | A:0     |              |
| chr28 | 9367828 | 2 | 36 | A:0                 | T:1     |              |
| chr28 | 9367875 | 2 | 36 | TA:1                | T:0     |              |
| chr28 | 9367881 | 2 | 36 | G:1                 | C:0     |              |
| chr28 | 9368763 | 2 | 16 | TA:0.8125           |         | T:0.1875     |
| chr28 | 9370512 | 2 | 30 | A:0.9               | G:0.1   |              |
| chr28 | 9371129 | 2 | 24 | G:0.291667          |         | C:0.708333   |
| chr28 | 9371139 | 2 | 24 | TCCGCGCCGCCCGCGCCGC |         | 0.333333     |
|       |         |   |    | T:0.666667          |         |              |
| chr28 | 9371311 | 2 | 24 | C:0.416667          |         | G:0.583333   |
| chr28 | 9371383 | 2 | 22 | G:0.136364          |         | T:0.863636   |
| chr28 | 9371461 | 2 | 26 | C:0.884615          |         | G:0.115385   |
| chr28 | 9372170 | 2 | 38 | A:1                 | G:0     |              |
| chr28 | 9372185 | 2 | 38 | A:1                 | G:0     |              |
| chr28 | 9372781 | 2 | 34 | CT:0.441176         |         | C:0.558824   |
| chr28 | 9374018 | 2 | 34 | G:0.647059          |         | C:0.352941   |
| chr28 | 9374197 | 2 | 36 | T:1                 | C:0     |              |
| chr28 | 9374225 | 2 | 34 | T:1                 | TTC:0   |              |
| chr28 | 9374408 | 2 | 38 | C:1                 | T:0     |              |
| chr28 | 9375292 | 2 | 38 | A:0                 | C:1     |              |
| chr28 | 9375559 | 2 | 38 | C:1                 | CCTCT:0 |              |
| chr28 | 9376063 | 2 | 36 | A:1                 | T:0     |              |
| chr28 | 9376620 | 2 | 36 | A:1                 | T:0     |              |
| chr28 | 9376724 | 2 | 38 | A:1                 | G:0     |              |
| chr28 | 9377246 | 2 | 40 | TCA:0.725           |         | T:0.275      |
| chr28 | 9377362 | 2 | 34 | T:1                 | A:0     |              |
| chr28 | 9377406 | 2 | 34 | G:1                 | A:0     |              |
| chr28 | 9378066 | 2 | 36 | TA:0.777778         |         | T:0.222222   |
| chr28 | 9378352 | 2 | 40 | T:1                 | C:0     |              |
| chr28 | 9379155 | 2 | 34 | CT:0.941176         |         | C:0.0588235  |
| chr28 | 9379714 | 2 | 38 | AT:0.578947         |         | A:0.421053   |
| chr28 | 9379904 | 2 | 36 | G:1                 | A:0     |              |
| chr28 | 9379915 | 2 | 40 | G:1                 | A:0     |              |
| chr28 | 9381902 | 2 | 38 | G:1                 | A:0     |              |
| chr28 | 9382377 | 2 | 30 | C:1                 | T:0     |              |
| chr28 | 9382570 | 2 | 34 | T:1                 | C:0     |              |
| chr28 | 9382869 | 2 | 34 | A:1                 | G:0     |              |
| chr28 | 9383106 | 2 | 30 | T:1                 | C:0     |              |
| chr28 | 9383420 | 2 | 38 | G:1                 | T:0     |              |
| chr28 | 9383516 | 2 | 36 | G:1                 | A:0     |              |
| chr28 | 9383681 | 2 | 36 | G:0.972222          |         | A:0.0277778  |
| chr28 | 9384144 | 2 | 38 | G:0.973684          |         | T:0.0263158  |
| chr28 | 9384153 | 2 | 38 | T:0.973684          |         | C:0.0263158  |
| chr28 | 9384469 | 2 | 36 | C:1                 | CT:0    |              |
| chr28 | 9384854 | 2 | 34 | C:1                 | G:0     |              |
| chr28 | 9384896 | 2 | 32 | CT:1                | C:0     |              |
| chr28 | 9385165 | 2 | 34 | A:1                 | G:0     |              |
| chr28 | 9385324 | 2 | 36 | TG:1                | T:0     |              |
| chr28 | 9385492 | 2 | 38 | G:0.947368          |         | GT:0.0526316 |
| chr28 | 9385817 | 2 | 38 | TAA:0.5             | T:0.5   |              |
| chr28 | 9385948 | 2 | 36 | A:1                 | G:0     |              |
| chr28 | 9386281 | 2 | 36 | AGCT:1              | A:0     |              |
| chr28 | 9386287 | 2 | 36 | T:1                 | A:0     |              |
| chr28 | 9387287 | 2 | 36 | C:0.972222          |         | T:0.0277778  |

|       |         |   |    |                         |          |             |                    |
|-------|---------|---|----|-------------------------|----------|-------------|--------------------|
| chr28 | 9387331 | 2 | 36 | C:1                     | T:0      |             |                    |
| chr28 | 9387708 | 2 | 36 | A:1                     | T:0      |             |                    |
| chr28 | 9387720 | 2 | 36 | A:1                     | T:0      |             |                    |
| chr28 | 9387722 | 2 | 36 | T:1                     | TC:0     |             |                    |
| chr28 | 9388020 | 2 | 34 | T:1                     | A:0      |             |                    |
| chr28 | 9388110 | 2 | 38 | C:1                     | T:0      |             |                    |
| chr28 | 9388356 | 2 | 30 | C:1                     | A:0      |             |                    |
| chr28 | 9388423 | 2 | 38 | T:1                     | A:0      |             |                    |
| chr28 | 9388498 | 2 | 34 | AT:0.970588             |          | A:0.0294118 |                    |
| chr28 | 9388688 | 2 | 36 | G:1                     | A:0      |             |                    |
| chr28 | 9388702 | 2 | 36 | A:1                     | G:0      |             |                    |
| chr28 | 9388808 | 2 | 40 | CTTCTG:1                | C:0      |             |                    |
| chr28 | 9388923 | 2 | 34 | G:1                     | A:0      |             |                    |
| chr28 | 9389027 | 2 | 36 | C:1                     | T:0      |             |                    |
| chr28 | 9389031 | 2 | 36 | A:1                     | G:0      |             |                    |
| chr28 | 9389127 | 2 | 38 | T:1                     | G:0      |             |                    |
| chr28 | 9389456 | 2 | 34 | TA:0.970588             |          | T:0.0294118 |                    |
| chr28 | 9389930 | 2 | 36 | G:1                     | A:0      |             |                    |
| chr28 | 9390113 | 2 | 32 | C:1                     | G:0      |             |                    |
| chr28 | 9390141 | 2 | 40 | GTCTCTGCCTCTCTCTC:0.825 | G:0.175  |             |                    |
| chr28 | 9390148 | 2 | 40 | C:1                     | CCT:0    |             |                    |
| chr28 | 9390206 | 2 | 34 | AT:1                    | A:0      |             |                    |
| chr28 | 9390620 | 3 | 30 | CTTT:0.166667           |          | C:0         | CTTTT:<br>0.833333 |
| chr28 | 9390863 | 2 | 36 | G:1                     | A:0      |             |                    |
| chr28 | 9390877 | 2 | 36 | A:1                     | G:0      |             |                    |
| chr28 | 9391347 | 2 | 34 | G:1                     | T:0      |             |                    |
| chr28 | 9391436 | 2 | 38 | A:1                     | G:0      |             |                    |
| chr28 | 9391460 | 2 | 40 | C:1                     | A:0      |             |                    |
| chr28 | 9391949 | 2 | 34 | TAA:0.823529            |          | T:0.176471  |                    |
| chr28 | 9392036 | 2 | 38 | T:1                     | C:0      |             |                    |
| chr28 | 9392240 | 2 | 38 | T:1                     | C:0      |             |                    |
| chr28 | 9392571 | 2 | 32 | G:1                     | A:0      |             |                    |
| chr28 | 9392725 | 2 | 38 | A:1                     | G:0      |             |                    |
| chr28 | 9392832 | 2 | 40 | G:1                     | T:0      |             |                    |
| chr28 | 9393098 | 2 | 38 | CGTTT:1                 | C:0      |             |                    |
| chr28 | 9393371 | 2 | 36 | G:1                     | A:0      |             |                    |
| chr28 | 9393865 | 2 | 34 | A:1                     | AAT:0    |             |                    |
| chr28 | 9393906 | 2 | 38 | A:1                     | AC:0     |             |                    |
| chr28 | 9394201 | 2 | 32 | C:1                     | T:0      |             |                    |
| chr28 | 9394334 | 2 | 40 | T:1                     | TA:0     |             |                    |
| chr28 | 9394397 | 2 | 40 | C:0.975                 | CT:0.025 |             |                    |
| chr28 | 9394399 | 2 | 40 | GCCCAGTTAA:0.975        | G:0.025  |             |                    |
| chr28 | 9394573 | 2 | 38 | G:1                     | A:0      |             |                    |
| chr28 | 9394893 | 2 | 34 | C:1                     | G:0      |             |                    |
| chr28 | 9394988 | 2 | 34 | C:0.735294              |          | CT:0.264706 |                    |
| chr28 | 9395160 | 2 | 36 | T:1                     | A:0      |             |                    |
| chr28 | 9395301 | 2 | 40 | G:1                     | T:0      |             |                    |
| chr28 | 9395358 | 2 | 38 | G:1                     | T:0      |             |                    |
| chr28 | 9397180 | 2 | 32 | TA:1                    | T:0      |             |                    |
| chr28 | 9397221 | 2 | 38 | T:1                     | TG:0     |             |                    |
| chr28 | 9397328 | 2 | 34 | C:1                     | A:0      |             |                    |
| chr28 | 9397335 | 2 | 34 | T:1                     | A:0      |             |                    |
| chr28 | 9397356 | 2 | 34 | CT:1                    | C:0      |             |                    |

|               |         |   |    |                |               |             |          |
|---------------|---------|---|----|----------------|---------------|-------------|----------|
| chr28         | 9397587 | 2 | 38 | C:1            | T:0           |             |          |
| chr28         | 9397666 | 2 | 38 | A:1            | T:0           |             |          |
| chr28         | 9398030 | 2 | 34 | A:1            | G:0           |             |          |
| chr28         | 9398401 | 2 | 40 | TA:1           | T:0           |             |          |
| chr28         | 9398419 | 2 | 40 | T:1            | TA:0          |             |          |
| chr28         | 9398455 | 2 | 40 | T:1            | G:0           |             |          |
| chr28         | 9398642 | 2 | 30 | A:1            | T:0           |             |          |
| chr28         | 9398643 | 2 | 30 | A:1            | C:0           |             |          |
| chr28         | 9398660 | 2 | 30 | A:1            | G:0           |             |          |
| chr28         | 9398733 | 2 | 34 | C:1            | T:0           |             |          |
| chr28         | 9399036 | 2 | 30 | G:1            | A:0           |             |          |
| chr28         | 9399350 | 2 | 34 | CCT:0.147059   |               | C:0.852941  |          |
| chr28         | 9399378 | 2 | 34 | AAATT:0.735294 |               | A:0.264706  |          |
| chr28         | 9399604 | 2 | 34 | T:1            | C:0           |             |          |
| chr28         | 9399605 | 2 | 34 | G:1            | A:0           |             |          |
| chr28         | 9399623 | 2 | 34 | G:1            | C:0           |             |          |
| chr28         | 9399641 | 2 | 34 | T:1            | C:0           |             |          |
| chr28         | 9399673 | 2 | 38 | G:1            | A:0           |             |          |
| chr28         | 9399755 | 3 | 34 | TA:0.588235    |               | T:0.352941  |          |
| TAA:0.0588235 |         |   |    |                |               |             |          |
| chr28         | 9399791 | 2 | 36 | A:1            | C:0           |             |          |
| chr28         | 9399927 | 2 | 38 | A:1            | C:0           |             |          |
| chr28         | 9400413 | 2 | 30 | C:1            | T:0           |             |          |
| chr28         | 9400472 | 2 | 38 | T:1            | TG:0          |             |          |
| chr28         | 9400654 | 2 | 36 | G:1            | A:0           |             |          |
| chr28         | 9400813 | 2 | 36 | GA:0.972222    |               | G:0.0277778 |          |
| chr28         | 9400892 | 2 | 38 | C:1            | T:0           |             |          |
| chr28         | 9401088 | 2 | 38 | C:1            | A:0           |             |          |
| chr28         | 9401781 | 2 | 38 | A:1            | ATGTGTGTGTG:0 |             |          |
| chr28         | 9401846 | 2 | 36 | G:1            | A:0           |             |          |
| chr28         | 9401855 | 2 | 36 | G:1            | A:0           |             |          |
| chr28         | 9402130 | 2 | 36 | A:1            | AT:0          |             |          |
| chr28         | 9402175 | 3 | 32 | CT:0.75        | C:0.09375     |             | CTT:     |
| 0.15625       |         |   |    |                |               |             |          |
| chr28         | 9402275 | 2 | 38 | T:1            | C:0           |             |          |
| chr28         | 9402316 | 2 | 38 | T:1            | C:0           |             |          |
| chr28         | 9402515 | 3 | 32 | ATC:0.875      |               | A:0.125     | ATTCTC:0 |
| chr28         | 9402517 | 2 | 32 | C:0.90625      |               | T:0.09375   |          |
| chr28         | 9403020 | 2 | 38 | A:1            | AT:0          |             |          |
| chr28         | 9403055 | 2 | 40 | AAC:1          | A:0           |             |          |
| chr28         | 9403414 | 2 | 38 | T:1            | C:0           |             |          |
| chr28         | 9403486 | 2 | 38 | T:1            | C:0           |             |          |
| chr28         | 9403716 | 2 | 38 | A:1            | G:0           |             |          |
| chr28         | 9403888 | 2 | 32 | C:1            | T:0           |             |          |
| chr28         | 9403982 | 2 | 38 | G:1            | C:0           |             |          |
| chr28         | 9404223 | 2 | 38 | AAT:0.736842   |               | A:0.263158  |          |
| chr28         | 9404561 | 2 | 38 | G:1            | A:0           |             |          |
| chr28         | 9404634 | 2 | 34 | C:1            | T:0           |             |          |
| chr28         | 9404838 | 2 | 38 | T:1            | C:0           |             |          |
| chr28         | 9404885 | 2 | 40 | T:1            | G:0           |             |          |
| chr28         | 9405333 | 2 | 38 | A:1            | G:0           |             |          |
| chr28         | 9405405 | 2 | 32 | C:1            | A:0           |             |          |
| chr28         | 9405444 | 2 | 34 | G:1            | T:0           |             |          |
| chr28         | 9405823 | 2 | 34 | A:1            | G:0           |             |          |

|                |                     |   |    |                  |                 |                     |
|----------------|---------------------|---|----|------------------|-----------------|---------------------|
| chr28          | 9405940             | 2 | 32 | G:1              | GA:0            |                     |
| chr28          | 9406050             | 2 | 38 | CT:1             | C:0             |                     |
| chr28          | 9406264             | 2 | 40 | G:1              | A:0             |                     |
| chr28          | 9406371             | 2 | 38 | C:1              | G:0             |                     |
| chr28          | 9406496             | 2 | 36 | T:1              | G:0             |                     |
| chr28          | 9406604             | 2 | 36 | A:1              | G:0             |                     |
| chr28          | 9406877             | 2 | 36 | C:1              | T:0             |                     |
| chr28          | 9406943             | 2 | 36 | G:1              | A:0             |                     |
| chr28          | 9407001             | 2 | 38 | GTC:0.947368     |                 | G:0.0526316         |
| chr28          | 9407048             | 2 | 34 | TA:0.647059      |                 | T:0.352941          |
| chr28          | 9407144             | 2 | 36 | G:1              | A:0             |                     |
| chr28          | 9407251             | 2 | 36 | G:1              | A:0             |                     |
| chr28          | 9407317             | 2 | 36 | CT:0.944444      |                 | C:0.0555556         |
| chr28          | 9407363             | 2 | 32 | C:1              | CAGAG:0         |                     |
| chr28          | 9407435             | 2 | 34 | T:1              | C:0             |                     |
| chr28          | 9407708             | 2 | 40 | A:1              | G:0             |                     |
| chr28          | 9408117             | 2 | 38 | A:1              | G:0             |                     |
| chr28          | 9408844             | 2 | 38 | T:1              | C:0             |                     |
| chr28          | 9409094             | 5 | 40 | TATAA:0.3        |                 | T:0.375             |
| TATAAATAA:0.3  | TATAAATAAATAA:0.025 |   |    |                  |                 | TATAAATAAATAAATAA:0 |
| chr28          | 9409136             | 2 | 40 | T:0.975          | TAAATAAAA:0.025 |                     |
| chr28          | 9409832             | 2 | 36 | A:1              | G:0             |                     |
| chr28          | 9412296             | 2 | 40 | G:1              | A:0             |                     |
| chr28          | 9412365             | 2 | 36 | C:1              | T:0             |                     |
| chr28          | 9412764             | 2 | 36 | T:1              | A:0             |                     |
| chr28          | 9413209             | 2 | 30 | C:0.933333       |                 | CCT:0.0666667       |
| chr28          | 9414925             | 2 | 30 | TA:0.933333      |                 | T:0.0666667         |
| chr28          | 9414938             | 2 | 32 | TTAA:1           | T:0             |                     |
| chr28          | 9414939             | 2 | 30 | TA:0             | T:1             |                     |
| chr28          | 9414983             | 2 | 34 | A:0              | G:1             |                     |
| chr28          | 9415014             | 2 | 34 | A:0              | G:1             |                     |
| chr28          | 9415036             | 2 | 34 | A:0              | G:1             |                     |
| chr28          | 9415125             | 2 | 32 | A:0              | C:1             |                     |
| chr28          | 9415544             | 2 | 34 | T:1              | G:0             |                     |
| chr28          | 9416238             | 2 | 40 | C:0.375          | CA:0.625        |                     |
| chr28          | 9416347             | 2 | 40 | C:0.375          | CA:0.625        |                     |
| chr28          | 9416349             | 2 | 40 | C:0.375          | CA:0.625        |                     |
| chr28          | 9416351             | 2 | 40 | G:0.375          | GA:0.625        |                     |
| chr28          | 9416355             | 2 | 40 | C:0.375          | CT:0.625        |                     |
| chr28          | 9417023             | 2 | 36 | GTTA:0.972222    |                 | G:0.0277778         |
| chr28          | 9417266             | 2 | 38 | G:1              | A:0             |                     |
| chr28          | 9417400             | 2 | 36 | C:1              | T:0             |                     |
| chr28          | 9417497             | 2 | 34 | C:1              | G:0             |                     |
| chr28          | 9418472             | 2 | 38 | A:1              | T:0             |                     |
| chr28          | 9418536             | 2 | 34 | A:1              | G:0             |                     |
| chr28          | 9419145             | 2 | 32 | T:1              | C:0             |                     |
| chr28          | 9419440             | 3 | 36 | CATATAT:0.194444 |                 | C:0.138889          |
| CATAT:0.666667 |                     |   |    |                  |                 |                     |
| chr28          | 9420740             | 2 | 36 | T:0.944444       |                 | A:0.0555556         |
| chr28          | 9422117             | 3 | 32 | TAA:0.09375      |                 | T:0.40625           |
| TA:0.5         |                     |   |    |                  |                 |                     |
| chr28          | 9422780             | 2 | 38 | GTTTGTT:0.973684 |                 | G:0.0263158         |
| chr28          | 9423180             | 2 | 36 | T:1              | A:0             |                     |
| chr28          | 9423467             | 2 | 40 | A:1              | G:0             |                     |

|                                      |         |   |    |                |                          |             |
|--------------------------------------|---------|---|----|----------------|--------------------------|-------------|
| chr28                                | 9423648 | 2 | 36 | C:1            | T:0                      |             |
| chr28                                | 9423833 | 2 | 38 | C:1            | CT:0                     |             |
| chr28                                | 9423839 | 2 | 38 | T:0.684211     |                          | TG:0.315789 |
| chr28                                | 9423840 | 2 | 36 | G:0.638889     |                          | T:0.361111  |
| chr28                                | 9425194 | 2 | 40 | T:1            | G:0                      |             |
| chr28                                | 9425684 | 2 | 36 | C:1            | T:0                      |             |
| chr28                                | 9425738 | 2 | 34 | C:1            | A:0                      |             |
| chr28                                | 9425879 | 2 | 36 | TA:1           | T:0                      |             |
| chr28                                | 9425882 | 2 | 36 | T:1            | C:0                      |             |
| chr28                                | 9425956 | 2 | 38 | G:1            | T:0                      |             |
| chr28                                | 9426387 | 2 | 36 | A:1            | G:0                      |             |
| chr28                                | 9426951 | 2 | 34 | T:0.852941     |                          | A:0.147059  |
| chr28                                | 9427212 | 2 | 40 | C:1            | T:0                      |             |
| chr28                                | 9427415 | 2 | 36 | A:1            | C:0                      |             |
| chr28                                | 9427767 | 2 | 38 | A:1            | T:0                      |             |
| chr28                                | 9428233 | 2 | 40 | T:1            | C:0                      |             |
| chr28                                | 9428369 | 2 | 34 | G:1            | A:0                      |             |
| chr28                                | 9428449 | 2 | 34 | G:1            | C:0                      |             |
| chr28                                | 9428465 | 2 | 32 | C:1            | T:0                      |             |
| chr28                                | 9428611 | 2 | 40 | ATCTCCCTGGTG:0 |                          | A:1         |
| chr28                                | 9428625 | 2 | 40 | TATCTTTC:0     |                          | T:1         |
| chr28                                | 9428633 | 2 | 40 | C:0            | CAAAAAAAAAAAAAAAAAAAAA:1 |             |
| chr28                                | 9428636 | 2 | 40 | C:0            | A:1                      |             |
| chr28                                | 9428727 | 2 | 40 | C:0            | A:1                      |             |
| chr28                                | 9428782 | 2 | 36 | G:0            | A:1                      |             |
| chr28                                | 9428833 | 2 | 38 | C:1            | T:0                      |             |
| chr28                                | 9428852 | 2 | 36 | C:0            | CA:1                     |             |
| chr28                                | 9428890 | 2 | 38 | G:1            | C:0                      |             |
| chr28                                | 9428914 | 2 | 38 | T:1            | C:0                      |             |
| chr28                                | 9428931 | 2 | 38 | T:0            | A:1                      |             |
| chr28                                | 9429394 | 2 | 40 | A:1            | T:0                      |             |
| chr28                                | 9429401 | 2 | 40 | A:1            |                          |             |
| ATAAATAAATAAATAAATAAATAAATAAATAAAT:0 |         |   |    |                |                          |             |
| chr28                                | 9429409 | 2 | 40 | G:1            | T:0                      |             |
| chr28                                | 9429422 | 2 | 40 | C:1            | G:0                      |             |
| chr28                                | 9429460 | 2 | 40 | G:1            | A:0                      |             |
| chr28                                | 9429511 | 2 | 36 | G:1            | C:0                      |             |
| chr28                                | 9429518 | 2 | 38 | A:1            | G:0                      |             |
| chr28                                | 9429977 | 2 | 36 | C:1            | T:0                      |             |
| chr28                                | 9430651 | 2 | 30 | TA:1           | T:0                      |             |
| chr28                                | 9431418 | 2 | 38 | T:1            | G:0                      |             |
| chr28                                | 9431600 | 2 | 36 | T:1            | C:0                      |             |
| chr28                                | 9431728 | 2 | 36 | TG:1           | T:0                      |             |
| chr28                                | 9431746 | 2 | 38 | G:1            | T:0                      |             |
| chr28                                | 9431863 | 2 | 38 | C:1            | T:0                      |             |
| chr28                                | 9431864 | 2 | 38 | C:1            | G:0                      |             |
| chr28                                | 9431869 | 2 | 38 | G:1            | T:0                      |             |
| chr28                                | 9432029 | 2 | 34 | G:1            | GAC:0                    |             |
| chr28                                | 9432086 | 2 | 36 | G:1            | C:0                      |             |
| chr28                                | 9432105 | 2 | 36 | C:1            | T:0                      |             |
| chr28                                | 9432107 | 2 | 36 | T:1            | A:0                      |             |
| chr28                                | 9432244 | 2 | 40 | C:1            | T:0                      |             |
| chr28                                | 9432247 | 2 | 40 | C:1            |                          |             |
| CGGGATCCCTGGGTGGCGCAGCGGTTT:0        |         |   |    |                |                          |             |

|                     |         |   |    |              |      |                |
|---------------------|---------|---|----|--------------|------|----------------|
| chr28               | 9432303 | 2 | 36 | T:1          | C:0  |                |
| chr28               | 9432351 | 2 | 38 | A:1          | G:0  |                |
| chr28               | 9432764 | 2 | 40 | A:1          | T:0  |                |
| chr28               | 9432963 | 2 | 38 | G:1          | C:0  |                |
| chr28               | 9433378 | 2 | 36 | CAAAT:1      | C:0  |                |
| chr28               | 9433708 | 2 | 38 | T:1          | C:0  |                |
| chr28               | 9433904 | 2 | 38 | C:1          | T:0  |                |
| chr28               | 9434848 | 2 | 34 | C:1          | T:0  |                |
| chr28               | 9435007 | 2 | 38 | G:1          | A:0  |                |
| chr28               | 9435282 | 2 | 36 | A:1          | T:0  |                |
| chr28               | 9435329 | 2 | 38 | G:1          | A:0  |                |
| chr28               | 9435369 | 2 | 38 | G:1          | T:0  |                |
| chr28               | 9435417 | 2 | 34 | A:1          | C:0  |                |
| chr28               | 9435633 | 2 | 38 | G:1          | A:0  |                |
| chr28               | 9435984 | 2 | 32 | G:0.84375    |      | GTT:0.15625    |
| chr28               | 9436029 | 2 | 38 | T:1          | C:0  |                |
| chr28               | 9436182 | 2 | 32 | C:1          | T:0  |                |
| chr28               | 9436385 | 2 | 38 | A:1          | G:0  |                |
| chr28               | 9436531 | 2 | 32 | C:1          | T:0  |                |
| chr28               | 9437044 | 2 | 40 | GAAAAAAGA:1  |      | G:0            |
| chr28               | 9437167 | 3 | 38 | G:0.868421   |      | GAAGA:0.131579 |
| GAAGAAAGAAAGAAAGA:0 |         |   |    |              |      |                |
| chr28               | 9437220 | 2 | 38 | AAG:0.973684 |      | A:0.0263158    |
| chr28               | 9438308 | 2 | 38 | T:1          | C:0  |                |
| chr28               | 9438570 | 2 | 38 | A:1          | G:0  |                |
| chr28               | 9438598 | 2 | 36 | A:1          | G:0  |                |
| chr28               | 9439112 | 2 | 38 | G:1          | A:0  |                |
| chr28               | 9439383 | 2 | 40 | A:1          | C:0  |                |
| chr28               | 9439813 | 2 | 38 | C:1          | T:0  |                |
| chr28               | 9439816 | 2 | 38 | C:1          | T:0  |                |
| chr28               | 9439872 | 2 | 40 | G:1          | A:0  |                |
| chr28               | 9440086 | 2 | 40 | G:1          | A:0  |                |
| chr28               | 9440269 | 2 | 36 | T:1          | C:0  |                |
| chr28               | 9440301 | 2 | 40 | C:1          | T:0  |                |
| chr28               | 9440404 | 2 | 34 | T:0.882353   |      | TA:0.117647    |
| chr28               | 9441330 | 2 | 36 | T:1          | C:0  |                |
| chr28               | 9441547 | 3 | 36 | ATT:0.888889 |      | A:0      AT:   |
| 0.111111            |         |   |    |              |      |                |
| chr28               | 9441578 | 2 | 38 | A:1          | T:0  |                |
| chr28               | 9441710 | 2 | 36 | CAG:0.916667 |      | C:0.0833333    |
| chr28               | 9441745 | 2 | 38 | G:1          | T:0  |                |
| chr28               | 9441756 | 2 | 38 | C:1          | T:0  |                |
| chr28               | 9442441 | 2 | 10 | G:0          | GC:1 |                |
| chr28               | 9442473 | 2 | 30 | A:0          | AG:1 |                |
| chr28               | 9442561 | 2 | 36 | A:0          | C:1  |                |
| chr28               | 9442666 | 2 | 34 | G:1          | A:0  |                |
| chr28               | 9442971 | 2 | 34 | C:1          | T:0  |                |
| chr28               | 9443556 | 2 | 36 | CTTTT:1      | C:0  |                |
| chr28               | 9443584 | 2 | 36 | C:1          | T:0  |                |
| chr28               | 9443764 | 2 | 36 | A:1          | G:0  |                |
| chr28               | 9443880 | 2 | 38 | A:1          | T:0  |                |
| chr28               | 9444011 | 2 | 36 | G:1          | A:0  |                |
| chr28               | 9444061 | 2 | 32 | ATGT:0.96875 |      | A:0.03125      |
| chr28               | 9444079 | 2 | 32 | T:0.96875    |      | C:0.03125      |

|               |         |   |    |                    |       |             |
|---------------|---------|---|----|--------------------|-------|-------------|
| chr28         | 9444233 | 2 | 38 | T:1                | A:0   |             |
| chr28         | 9444234 | 2 | 38 | T:0.947368         |       | A:0.0526316 |
| chr28         | 9444364 | 2 | 34 | A:1                | T:0   |             |
| chr28         | 9444470 | 2 | 40 | C:1                | G:0   |             |
| chr28         | 9445035 | 2 | 38 | G:1                | A:0   |             |
| chr28         | 9445149 | 2 | 36 | T:1                | G:0   |             |
| chr28         | 9445583 | 2 | 40 | GTTCATTTCTCC:0.525 |       | G:0.475     |
| chr28         | 9445639 | 2 | 40 | C:0                | CA:1  |             |
| chr28         | 9445772 | 2 | 38 | T:1                | G:0   |             |
| chr28         | 9445921 | 2 | 36 | C:1                | G:0   |             |
| chr28         | 9445978 | 2 | 36 | GACAA:1            | G:0   |             |
| chr28         | 9445984 | 2 | 36 | C:1                | T:0   |             |
| chr28         | 9446204 | 2 | 36 | A:1                | G:0   |             |
| chr28         | 9446344 | 2 | 38 | A:1                | T:0   |             |
| chr28         | 9446623 | 3 | 30 | GACAC:0.2          |       | G:0.766667  |
| GAC:0.0333333 |         |   |    |                    |       |             |
| chr28         | 9447360 | 2 | 38 | T:1                | C:0   |             |
| chr28         | 9448027 | 2 | 38 | C:0                | CT:1  |             |
| chr28         | 9448308 | 2 | 38 | T:1                | C:0   |             |
| chr28         | 9448777 | 2 | 36 | A:1                | G:0   |             |
| chr28         | 9448821 | 2 | 34 | A:1                | T:0   |             |
| chr28         | 9448828 | 2 | 34 | G:1                | A:0   |             |
| chr28         | 9449544 | 2 | 38 | A:1                | G:0   |             |
| chr28         | 9449897 | 2 | 40 | G:1                | A:0   |             |
| chr28         | 9449905 | 2 | 40 | A:1                | G:0   |             |
| chr28         | 9450169 | 2 | 36 | A:1                | G:0   |             |
| chr28         | 9450262 | 2 | 38 | A:1                | G:0   |             |
| chr28         | 9450367 | 2 | 38 | C:1                | T:0   |             |
| chr28         | 9450609 | 2 | 38 | G:1                | A:0   |             |
| chr28         | 9450610 | 2 | 38 | T:1                | A:0   |             |
| chr28         | 9450900 | 2 | 40 | G:1                | A:0   |             |
| chr28         | 9451000 | 2 | 32 | T:1                | G:0   |             |
| chr28         | 9451020 | 2 | 32 | A:1                | G:0   |             |
| chr28         | 9451201 | 2 | 36 | T:1                | C:0   |             |
| chr28         | 9451362 | 2 | 30 | T:1                | C:0   |             |
| chr28         | 9451900 | 2 | 36 | G:1                | T:0   |             |
| chr28         | 9452012 | 2 | 40 | G:1                | A:0   |             |
| chr28         | 9452028 | 2 | 40 | T:1                | A:0   |             |
| chr28         | 9452129 | 2 | 34 | T:1                | C:0   |             |
| chr28         | 9452233 | 2 | 38 | A:1                | G:0   |             |
| chr28         | 9452270 | 2 | 36 | G:1                | A:0   |             |
| chr28         | 9452314 | 2 | 30 | TG:0.8             | T:0.2 |             |
| chr28         | 9452427 | 2 | 36 | G:1                | A:0   |             |
| chr28         | 9452712 | 2 | 34 | A:1                | G:0   |             |
| chr28         | 9452734 | 2 | 34 | T:1                | G:0   |             |
| chr28         | 9453163 | 3 | 38 | C:0.236842         |       | CA:0.736842 |
| CAA:0.0263158 |         |   |    |                    |       |             |
| chr28         | 9453932 | 2 | 40 | TTATCTCTAAAA:0.9   | T:0.1 |             |
| chr28         | 9454106 | 2 | 34 | A:1                | T:0   |             |
| chr28         | 9454107 | 2 | 34 | A:1                | T:0   |             |
| chr28         | 9454196 | 2 | 40 | C:1                | T:0   |             |
| chr28         | 9454395 | 2 | 38 | T:1                | TA:0  |             |
| chr28         | 9454706 | 2 | 36 | TC:1               | T:0   |             |
| chr28         | 9454805 | 2 | 36 | C:1                | T:0   |             |



|                                                      |         |   |    |                |               |               |
|------------------------------------------------------|---------|---|----|----------------|---------------|---------------|
| chr28                                                | 9455025 | 2 | 40 | A:0.975        | C:0.025       |               |
| chr28                                                | 9455167 | 2 | 36 | T:1            | C:0           |               |
| chr28                                                | 9455343 | 2 | 38 | C:1            | T:0           |               |
| chr28                                                | 9455449 | 2 | 38 | A:1            | G:0           |               |
| chr28                                                | 9455723 | 2 | 38 | A:1            | G:0           |               |
| chr28                                                | 9455757 | 2 | 36 | T:1            | C:0           |               |
| chr28                                                | 9455869 | 2 | 40 | T:1            | C:0           |               |
| chr28                                                | 9455902 | 2 | 36 | G:1            | A:0           |               |
| chr28                                                | 9456042 | 2 | 28 | C:1            | A:0           |               |
| chr28                                                | 9456143 | 2 | 38 | C:0.947368     |               | A:0.0526316   |
| chr28                                                | 9456168 | 2 | 40 | C:1            | CTGTT:0       |               |
| chr28                                                | 9456189 | 2 | 40 | C:1            | T:0           |               |
| chr28                                                | 9456651 | 2 | 40 | C:1            | A:0           |               |
| chr28                                                | 9456873 | 2 | 38 | A:1            | T:0           |               |
| chr28                                                | 9456996 | 2 | 40 | A:1            | AGTCAGAATTG:0 |               |
| chr28                                                | 9457229 | 2 | 34 | C:1            | T:0           |               |
| chr28                                                | 9457587 | 2 | 36 | A:1            | ATACT:0       |               |
| chr28                                                | 9457713 | 2 | 38 | C:1            | T:0           |               |
| chr28                                                | 9457811 | 2 | 40 | T:1            |               |               |
| TAGAACTTACTGTTTTAAAAAATAAATAAATAAAATAAAATAAAAAAAAA:0 |         |   |    |                |               |               |
| chr28                                                | 9457928 | 2 | 38 | C:1            | G:0           |               |
| chr28                                                | 9457936 | 2 | 38 | A:1            | G:0           |               |
| chr28                                                | 9458001 | 2 | 34 | T:1            | A:0           |               |
| chr28                                                | 9458292 | 2 | 36 | A:1            | G:0           |               |
| chr28                                                | 9458778 | 2 | 32 | G:0.96875      |               | T:0.03125     |
| chr28                                                | 9458795 | 2 | 30 | T:1            | C:0           |               |
| chr28                                                | 9459245 | 2 | 40 | G:1            | T:0           |               |
| chr28                                                | 9459498 | 2 | 36 | CA:1           | C:0           |               |
| chr28                                                | 9459828 | 2 | 40 | A:1            | G:0           |               |
| chr28                                                | 9459891 | 2 | 40 | A:1            | C:0           |               |
| chr28                                                | 9460192 | 2 | 36 | T:1            | C:0           |               |
| chr28                                                | 9461215 | 2 | 38 | A:1            | G:0           |               |
| chr28                                                | 9461439 | 2 | 36 | A:1            | G:0           |               |
| chr28                                                | 9462044 | 2 | 36 | A:0.833333     |               | T:0.166667    |
| chr28                                                | 9462052 | 3 | 38 | A:0.973684     |               | T:0 AT:       |
| 0.0263158                                            |         |   |    |                |               |               |
| chr28                                                | 9462054 | 3 | 38 | T:0.0263158    |               | A:0.0526316   |
| TA:0.921053                                          |         |   |    |                |               |               |
| chr28                                                | 9462408 | 2 | 38 | G:1            | A:0           |               |
| chr28                                                | 9462535 | 2 | 38 | A:1            | G:0           |               |
| chr28                                                | 9462713 | 2 | 40 | G:1            | T:0           |               |
| chr28                                                | 9462752 | 2 | 40 | G:1            | T:0           |               |
| chr28                                                | 9462942 | 2 | 36 | A:1            | T:0           |               |
| chr28                                                | 9463848 | 2 | 36 | G:1            | C:0           |               |
| chr28                                                | 9463906 | 2 | 34 | CCT:0.882353   |               | C:0.117647    |
| chr28                                                | 9463999 | 2 | 38 | T:1            | A:0           |               |
| chr28                                                | 9464086 | 2 | 38 | CAA:1          | C:0           |               |
| chr28                                                | 9464290 | 2 | 34 | C:1            | CAAT:0        |               |
| chr28                                                | 9464350 | 2 | 36 | G:1            | A:0           |               |
| chr28                                                | 9464386 | 3 | 36 | GATAT:0.777778 |               | G:0 GAT:      |
| 0.222222                                             |         |   |    |                |               |               |
| chr28                                                | 9465510 | 2 | 34 | C:1            | A:0           |               |
| chr28                                                | 9465524 | 3 | 32 | G:0.71875      |               | GATTT:0.09375 |
| GATTTATTT:0.1875                                     |         |   |    |                |               |               |

|       |          |   |    |               |          |             |      |
|-------|----------|---|----|---------------|----------|-------------|------|
| chr28 | 9465616  | 2 | 38 | G:1           | A:0      |             |      |
| chr28 | 9465675  | 2 | 30 | G:1           | A:0      |             |      |
| chr28 | 9466782  | 2 | 38 | T:1           | C:0      |             |      |
| chr28 | 9466972  | 2 | 36 | G:1           | A:0      |             |      |
| chr28 | 9467047  | 2 | 38 | G:1           | A:0      |             |      |
| chr28 | 9467215  | 2 | 34 | AG:1          | A:0      |             |      |
| chr28 | 9467298  | 2 | 36 | C:1           | T:0      |             |      |
| chr28 | 9467639  | 2 | 38 | G:1           | T:0      |             |      |
| chr28 | 9467695  | 2 | 38 | G:1           | A:0      |             |      |
| chr28 | 9467980  | 2 | 34 | C:1           | T:0      |             |      |
| chr28 | 9468105  | 2 | 34 | T:1           | C:0      |             |      |
| chr28 | 9468372  | 2 | 30 | C:0           | A:1      |             |      |
| chr28 | 9468424  | 2 | 36 | G:0           | T:1      |             |      |
| chr28 | 9468495  | 2 | 30 | G:0.833333    |          | T:0.166667  |      |
| chr28 | 9468515  | 2 | 26 | GC:0.653846   |          | G:0.346154  |      |
| chr28 | 9468894  | 2 | 38 | A:1           | G:0      |             |      |
| chr28 | 9468919  | 2 | 38 | T:1           | G:0      |             |      |
| chr28 | 9469082  | 2 | 38 | A:1           | C:0      |             |      |
| chr28 | 9469240  | 2 | 32 | T:1           | C:0      |             |      |
| chr28 | 9469513  | 2 | 38 | C:1           | T:0      |             |      |
| chr28 | 9469663  | 2 | 36 | G:1           | A:0      |             |      |
| chr28 | 9469964  | 2 | 38 | A:1           | C:0      |             |      |
| chr28 | 9470952  | 2 | 34 | A:1           | G:0      |             |      |
| chr28 | 9471337  | 2 | 38 | T:0.710526    |          | C:0.289474  |      |
| chr28 | 9471374  | 2 | 36 | A:1           | T:0      |             |      |
| chr28 | 9471647  | 2 | 36 | T:1           | C:0      |             |      |
| chr28 | 9471683  | 2 | 34 | C:1           | T:0      |             |      |
| chr28 | 9471820  | 3 | 38 | TAAA:0.421053 |          | T:0         | TAA: |
|       | 0.578947 |   |    |               |          |             |      |
| chr28 | 9471824  | 2 | 38 | A:1           | T:0      |             |      |
| chr28 | 9471834  | 2 | 38 | A:1           | T:0      |             |      |
| chr28 | 9471878  | 2 | 26 | TA:0.884615   |          | T:0.115385  |      |
| chr28 | 9472139  | 2 | 36 | G:1           | GAATA:0  |             |      |
| chr28 | 9472160  | 2 | 36 | A:1           | C:0      |             |      |
| chr28 | 9472164  | 3 | 36 | TA:0.916667   |          | T:0.0833333 |      |
|       | TAA:0    |   |    |               |          |             |      |
| chr28 | 9472507  | 2 | 34 | A:1           | T:0      |             |      |
| chr28 | 9472509  | 2 | 34 | A:1           | ATT:0    |             |      |
| chr28 | 9472687  | 2 | 34 | TAA:1         | T:0      |             |      |
| chr28 | 9472771  | 2 | 34 | T:1           | C:0      |             |      |
| chr28 | 9472811  | 2 | 34 | T:1           | C:0      |             |      |
| chr28 | 9472976  | 2 | 36 | C:0.972222    |          | T:0.0277778 |      |
| chr28 | 9473107  | 2 | 36 | G:0.611111    |          | T:0.388889  |      |
| chr28 | 9473232  | 2 | 36 | T:0           | C:1      |             |      |
| chr28 | 9473467  | 2 | 36 | C:1           | G:0      |             |      |
| chr28 | 9473630  | 2 | 36 | G:1           | A:0      |             |      |
| chr28 | 9473921  | 2 | 38 | C:1           | T:0      |             |      |
| chr28 | 9474078  | 2 | 38 | A:1           | T:0      |             |      |
| chr28 | 9474098  | 2 | 38 | GT:0.947368   |          | G:0.0526316 |      |
| chr28 | 9474243  | 2 | 36 | G:1           | A:0      |             |      |
| chr28 | 9474274  | 2 | 34 | A:0.970588    |          | G:0.0294118 |      |
| chr28 | 9474534  | 2 | 38 | C:1           | G:0      |             |      |
| chr28 | 9475305  | 2 | 36 | C:1           | A:0      |             |      |
| chr28 | 9475872  | 2 | 40 | T:0.825       | TA:0.175 |             |      |

|           |                |   |    |                         |               |         |  |
|-----------|----------------|---|----|-------------------------|---------------|---------|--|
| chr28     | 9475873        | 2 | 40 | A:1                     | T:0           |         |  |
| chr28     | 9477403        | 2 | 40 | C:1                     | G:0           |         |  |
| chr28     | 9477706        | 2 | 38 | C:1                     | A:0           |         |  |
| chr28     | 9480667        | 2 | 36 | T:1                     | C:0           |         |  |
| chr28     | 9481732        | 2 | 40 | G:1                     | T:0           |         |  |
| chr28     | 9484016        | 2 | 34 | T:1                     | C:0           |         |  |
| chr28     | 9484192        | 2 | 32 | G:1                     | GTA:0         |         |  |
| chr28     | 9484730        | 2 | 38 | T:1                     | C:0           |         |  |
| chr28     | 9485452        | 2 | 38 | GTA:0.947368            | G:0.0526316   |         |  |
| chr28     | 9485454        | 2 | 40 | A:1                     | G:0           |         |  |
| chr28     | 9485472        | 2 | 38 | C:0.947368              | T:0.0526316   |         |  |
| chr28     | 9486159        | 4 | 36 | ATATTTATT:0.222222      | A:            |         |  |
| 0.333333  | ATATT:0.444444 |   |    | ATATTTATT:0             |               |         |  |
| chr28     | 9486719        | 3 | 38 | TGA:0.973684            | T:0.0263158   |         |  |
| TGAGA:0   |                |   |    |                         |               |         |  |
| chr28     | 9487304        | 2 | 36 | A:1                     | C:0           |         |  |
| chr28     | 9488801        | 2 | 38 | AAG:1                   | A:0           |         |  |
| chr28     | 9489052        | 2 | 20 | AT:0.75                 | A:0.25        |         |  |
| chr28     | 9489128        | 2 | 36 | C:1                     | T:0           |         |  |
| chr28     | 9489474        | 2 | 30 | T:0                     | A:1           |         |  |
| chr28     | 9490421        | 2 | 40 | C:1                     | T:0           |         |  |
| chr28     | 9492278        | 2 | 40 | G:0.925                 | T:0.075       |         |  |
| chr28     | 9492364        | 2 | 36 | GC:0.833333             | G:0.166667    |         |  |
| chr28     | 9492496        | 2 | 28 | TG:0.535714             | T:0.464286    |         |  |
| chr28     | 9492789        | 2 | 34 | AT:0.0588235            | A:0.941176    |         |  |
| chr28     | 9492936        | 2 | 36 | C:0.888889              | A:0.111111    |         |  |
| chr28     | 9493004        | 2 | 40 | G:1                     | T:0           |         |  |
| chr28     | 9493238        | 3 | 40 | TTTTATTTA:0.725         | T:0.275       | TTTTA:0 |  |
| chr28     | 9493368        | 2 | 38 | G:0.526316              | A:0.473684    |         |  |
| chr28     | 9493572        | 2 | 38 | C:0.552632              | T:0.447368    |         |  |
| chr28     | 9493903        | 2 | 38 | C:0.578947              | T:0.421053    |         |  |
| chr28     | 9494588        | 2 | 40 | C:0.85                  | T:0.15        |         |  |
| chr28     | 9494885        | 2 | 38 | CTATGTTTCCTAGT:0.447368 | C:            |         |  |
| 0.552632  |                |   |    |                         |               |         |  |
| chr28     | 9494918        | 2 | 38 | C:1                     | T:0           |         |  |
| chr28     | 9495016        | 2 | 36 | C:0.805556              | G:0.194444    |         |  |
| chr28     | 9495288        | 2 | 30 | G:0.466667              | T:0.533333    |         |  |
| chr28     | 9495331        | 2 | 32 | A:0.46875               | AT:0.53125    |         |  |
| chr28     | 9495351        | 2 | 34 | TTTTAAATTA:0.941176     | T:            |         |  |
| 0.0588235 |                |   |    |                         |               |         |  |
| chr28     | 9495479        | 2 | 36 | T:0.611111              | A:0.388889    |         |  |
| chr28     | 9495505        | 2 | 36 | C:0.444444              | A:0.555556    |         |  |
| chr28     | 9495512        | 2 | 36 | C:0.444444              | A:0.555556    |         |  |
| chr28     | 9495626        | 2 | 40 | C:0.475                 | CACAG:0.525   |         |  |
| chr28     | 9495731        | 2 | 36 | A:0                     | G:1           |         |  |
| chr28     | 9495755        | 2 | 36 | G:0.583333              | A:0.416667    |         |  |
| chr28     | 9495778        | 2 | 38 | G:0.578947              | A:0.421053    |         |  |
| chr28     | 9496008        | 2 | 38 | T:0.657895              | TATG:0.342105 |         |  |
| chr28     | 9496100        | 2 | 30 | C:0.6                   | T:0.4         |         |  |
| chr28     | 9496179        | 2 | 40 | GATT:0.9                | G:0.1         |         |  |
| chr28     | 9496208        | 2 | 38 | AG:0.526316             | A:0.473684    |         |  |
| chr28     | 9496209        | 2 | 38 | GGAGA:0.5               | G:0.5         |         |  |
| chr28     | 9496213        | 2 | 38 | A:0.526316              | AG:0.473684   |         |  |
| chr28     | 9496260        | 2 | 36 | G:0.472222              | T:0.527778    |         |  |

|              |         |   |    |                                |                  |
|--------------|---------|---|----|--------------------------------|------------------|
| chr28        | 9496284 | 3 | 36 | T:0.472222                     | C:0.444444       |
| G:0.0833333  |         |   |    |                                |                  |
| chr28        | 9496489 | 2 | 34 | CT:0.529412                    | C:0.470588       |
| chr28        | 9496593 | 2 | 38 | A:0.578947                     | G:0.421053       |
| chr28        | 9498183 | 2 | 38 | A:0.526316                     | G:0.473684       |
| chr28        | 9498273 | 2 | 32 | A:0.59375                      | T:0.40625        |
| chr28        | 9498387 | 2 | 36 | A:0.583333                     | G:0.416667       |
| chr28        | 9498587 | 3 | 36 | A:0.361111                     | AT:0.527778      |
| ATT:0.111111 |         |   |    |                                |                  |
| chr28        | 9498665 | 2 | 36 | A:0.555556                     | G:0.444444       |
| chr28        | 9498680 | 2 | 36 | G:0.722222                     | A:0.277778       |
| chr28        | 9498726 | 2 | 36 | T:0.444444                     | G:0.555556       |
| chr28        | 9498764 | 2 | 34 | G:0.617647                     | A:0.382353       |
| chr28        | 9498915 | 3 | 30 | GT:0.433333                    | G:0.166667       |
| GTT:0.4      |         |   |    |                                |                  |
| chr28        | 9499084 | 2 | 38 | A:0.552632                     | AGTTGTT:0.447368 |
| chr28        | 9499151 | 2 | 36 | C:1 T:0                        |                  |
| chr28        | 9499210 | 2 | 34 | G:0.441176                     | GAA:0.558824     |
| chr28        | 9499407 | 2 | 32 | GA:1 G:0                       |                  |
| chr28        | 9499490 | 2 | 36 | G:0.638889                     | T:0.361111       |
| chr28        | 9499610 | 2 | 36 | C:0.416667                     | T:0.583333       |
| chr28        | 9499889 | 2 | 36 | T:0.361111                     | G:0.638889       |
| chr28        | 9499975 | 2 | 38 | C:0.394737                     | A:0.605263       |
| chr28        | 9500610 | 2 | 36 | A:0.527778                     | G:0.472222       |
| chr28        | 9500809 | 2 | 40 | A:0.625 G:0.375                |                  |
| chr28        | 9501246 | 2 | 34 | C:0.588235                     | T:0.411765       |
| chr28        | 9501285 | 2 | 34 | T:0.617647                     | C:0.382353       |
| chr28        | 9501415 | 3 | 36 | T:0.416667                     | TTA:0.333333     |
| TTTA:0.25    |         |   |    |                                |                  |
| chr28        | 9501431 | 2 | 36 | AT:0.416667                    | A:0.583333       |
| chr28        | 9501440 | 2 | 36 | T:0.416667                     | A:0.583333       |
| chr28        | 9501715 | 2 | 38 | CT:0.394737                    | C:0.605263       |
| chr28        | 9501902 | 2 | 38 | T:0.421053                     | C:0.578947       |
| chr28        | 9502402 | 2 | 38 | G:0.447368                     | A:0.552632       |
| chr28        | 9502449 | 2 | 38 | C:0.842105                     | T:0.157895       |
| chr28        | 9503233 | 2 | 38 | T:0.342105                     | C:0.657895       |
| chr28        | 9503303 | 2 | 38 | A:0.815789                     | G:0.184211       |
| chr28        | 9503721 | 2 | 32 | C:0.9375 T:0.0625              |                  |
| chr28        | 9503885 | 2 | 40 | T:0.525 G:0.475                |                  |
| chr28        | 9504296 | 2 | 38 | T:0.578947                     | C:0.421053       |
| chr28        | 9504525 | 2 | 36 | A:0.583333                     | C:0.416667       |
| chr28        | 9505005 | 2 | 36 | T:0.5 C:0.5                    |                  |
| chr28        | 9505226 | 2 | 38 | A:0.605263                     | G:0.394737       |
| chr28        | 9505395 | 2 | 36 | A:0.638889                     | AAAT:0.361111    |
| chr28        | 9505549 | 2 | 40 | CTCCTTCCTTCCTGTATCTTTATGCT:0.5 |                  |
| C:0.5        |         |   |    |                                |                  |
| chr28        | 9505860 | 2 | 34 | T:0.470588                     | C:0.529412       |
| chr28        | 9506135 | 2 | 34 | T:0.588235                     | A:0.411765       |
| chr28        | 9506136 | 2 | 34 | C:0.588235                     | A:0.411765       |
| chr28        | 9506513 | 2 | 40 | T:0.4 A:0.6                    |                  |
| chr28        | 9506791 | 2 | 38 | G:0.342105                     | A:0.657895       |
| chr28        | 9507084 | 2 | 40 | A:0.625 G:0.375                |                  |
| chr28        | 9507340 | 2 | 40 | T:0.625 TTCTCTCTCTC:0.375      |                  |
| chr28        | 9508167 | 2 | 34 | T:0.705882                     | C:0.294118       |

|                                      |         |   |    |                            |               |          |
|--------------------------------------|---------|---|----|----------------------------|---------------|----------|
| chr28                                | 9508173 | 2 | 34 | T:1                        | G:0           |          |
| chr28                                | 9508449 | 2 | 36 | A:0.583333                 | G:0.416667    |          |
| chr28                                | 9508663 | 2 | 40 | G:1                        | A:0           |          |
| chr28                                | 9508770 | 2 | 38 | G:0.631579                 | A:0.368421    |          |
| chr28                                | 9509126 | 2 | 38 | G:0.5                      | A:0.5         |          |
| chr28                                | 9509282 | 2 | 36 | T:0.444444                 | C:0.555556    |          |
| chr28                                | 9509465 | 2 | 36 | C:0.555556                 | T:0.444444    |          |
| chr28                                | 9509494 | 2 | 38 | T:0.368421                 | A:0.631579    |          |
| chr28                                | 9510303 | 2 | 38 | C:0.368421                 | CT:0.631579   |          |
| chr28                                | 9510340 | 2 | 30 | GTTTT:0.333333             | G:0.666667    |          |
| chr28                                | 9510675 | 3 | 38 | TAA:0.631579               | T:0.289474    |          |
| TA:0.0789474                         |         |   |    |                            |               |          |
| chr28                                | 9511120 | 2 | 26 | AT:0.846154                | A:0.153846    |          |
| chr28                                | 9511125 | 3 | 26 | T:0.153846                 | G:0.423077    |          |
| TG:0.423077                          |         |   |    |                            |               |          |
| chr28                                | 9511342 | 2 | 26 | CTTT:0.538462              | C:0.461538    |          |
| chr28                                | 9511791 | 2 | 36 | T:0.777778                 | C:0.222222    |          |
| chr28                                | 9512450 | 3 | 38 | CCTCTCT:0.578947           | C:0.342105    |          |
| CCTCT:0.0789474                      |         |   |    |                            |               |          |
| chr28                                | 9512527 | 2 | 38 | A:0.473684                 | C:0.526316    |          |
| chr28                                | 9512624 | 2 | 36 | A:0.416667                 | C:0.583333    |          |
| chr28                                | 9512645 | 2 | 36 | TG:0.694444                | T:0.305556    |          |
| chr28                                | 9513488 | 5 | 40 | GGT:0.425                  | G:0.1         | GGTGT:   |
| 0.1 GGTGTGTGT:0.05 GGTGTGTGTGT:0.325 |         |   |    |                            |               |          |
| chr28                                | 9513529 | 2 | 40 | TTGATTTGCATTTCTCTGA:0.875  | T:0.125       |          |
| chr28                                | 9513642 | 2 | 24 | CTT:0.625                  | C:0.375       |          |
| chr28                                | 9513673 | 2 | 32 | T:0.5                      | C:0.5         |          |
| chr28                                | 9513850 | 2 | 36 | A:0.361111                 | G:0.638889    |          |
| chr28                                | 9513900 | 2 | 34 | C:0.676471                 | CTT:0.323529  |          |
| chr28                                | 9514092 | 2 | 34 | C:1                        | T:0           |          |
| chr28                                | 9514247 | 2 | 40 | A:0.875                    | G:0.125       |          |
| chr28                                | 9514276 | 2 | 40 | C:0.6                      | T:0.4         |          |
| chr28                                | 9514391 | 3 | 34 | CCT:0.676471               | C:0.294118    |          |
| CCTCT:0.0294118                      |         |   |    |                            |               |          |
| chr28                                | 9515554 | 2 | 40 | C:0.575                    | T:0.425       |          |
| chr28                                | 9516333 | 2 | 34 | A:0.441176                 | ATAG:0.558824 |          |
| chr28                                | 9517458 | 2 | 38 | G:0.526316                 | T:0.473684    |          |
| chr28                                | 9517894 | 2 | 30 | GA:0.933333                | G:0.0666667   |          |
| chr28                                | 9517899 | 2 | 34 | GAAAAGAAAAGAAAAGA:0.823529 |               |          |
| G:0.176471                           |         |   |    |                            |               |          |
| chr28                                | 9517904 | 2 | 34 | GAAAAGAAAAGA:0.911765      | G:            |          |
| 0.0882353                            |         |   |    |                            |               |          |
| chr28                                | 9517909 | 2 | 40 | GAAAAGA:0.9                | G:0.1         |          |
| chr28                                | 9517914 | 2 | 40 | GA:0.875                   | G:0.125       |          |
| chr28                                | 9517928 | 3 | 40 | AAAAAGAAAAG:0.4            | A:0.6         | AAAAAG:0 |
| chr28                                | 9518095 | 2 | 32 | GAGAA:0.78125              | G:0.21875     |          |
| chr28                                | 9518139 | 2 | 36 | AAAAGAAAAGAAAG:0.805556    | A:            |          |
| 0.194444                             |         |   |    |                            |               |          |
| chr28                                | 9518438 | 2 | 34 | G:0.735294                 | T:0.264706    |          |
| chr28                                | 9518562 | 2 | 36 | C:0.638889                 | CT:0.361111   |          |
| chr28                                | 9518567 | 2 | 36 | T:0.388889                 | TA:0.611111   |          |
| chr28                                | 9518776 | 2 | 28 | G:0.5                      | C:0.5         |          |
| chr28                                | 9518823 | 4 | 30 | TAAAA:0.433333             | T:0.0666667   |          |
| TAA:0.133333 TAAA:0.366667           |         |   |    |                            |               |          |

|                       |         |   |    |                       |               |
|-----------------------|---------|---|----|-----------------------|---------------|
| chr28                 | 9518931 | 2 | 36 | AC:0.527778           | A:0.472222    |
| chr28                 | 9518934 | 2 | 36 | TGGA:0.527778         | T:0.472222    |
| chr28                 | 9520117 | 2 | 38 | C:1 T:0               |               |
| chr28                 | 9520496 | 2 | 38 | C:0.526316            | G:0.473684    |
| chr28                 | 9520512 | 2 | 38 | G:0.526316            | A:0.473684    |
| chr28                 | 9520561 | 2 | 34 | A:0.411765            | T:0.588235    |
| chr28                 | 9520834 | 2 | 38 | CA:0.421053           | C:0.578947    |
| chr28                 | 9520922 | 2 | 34 | G:0.529412            | T:0.470588    |
| chr28                 | 9520997 | 2 | 32 | G:0.875 A:0.125       |               |
| chr28                 | 9521353 | 2 | 38 | T:0.894737            | A:0.105263    |
| chr28                 | 9521380 | 2 | 38 | G:0.578947            | A:0.421053    |
| chr28                 | 9521388 | 2 | 40 | C:0.55 T:0.45         |               |
| chr28                 | 9522025 | 2 | 38 | C:0.842105            | T:0.157895    |
| chr28                 | 9522046 | 3 | 34 | G:0.852941            | GAA:0.147059  |
| GAAA:0                |         |   |    |                       |               |
| chr28                 | 9522056 | 2 | 34 | AG:0.617647           | A:0.382353    |
| chr28                 | 9522057 | 2 | 34 | G:0.852941            | A:0.147059    |
| chr28                 | 9522239 | 2 | 38 | A:0.894737            | T:0.105263    |
| chr28                 | 9522566 | 2 | 40 | G:0.825 T:0.175       |               |
| chr28                 | 9522631 | 2 | 38 | C:0.868421            | T:0.131579    |
| chr28                 | 9522639 | 2 | 40 | A:1 G:0               |               |
| chr28                 | 9522821 | 2 | 32 | C:0.375 CCTCTGT:0.625 |               |
| chr28                 | 9523058 | 2 | 34 | T:0.558824            | G:0.441176    |
| chr28                 | 9523213 | 2 | 28 | C:0.892857            | T:0.107143    |
| chr28                 | 9524088 | 2 | 38 | G:0.842105            | A:0.157895    |
| chr28                 | 9524160 | 2 | 38 | T:0.552632            | TC:0.447368   |
| chr28                 | 9524162 | 2 | 38 | T:0.552632            | C:0.447368    |
| chr28                 | 9524196 | 2 | 36 | T:0.416667            | A:0.583333    |
| chr28                 | 9525081 | 2 | 36 | G:0.444444            | A:0.555556    |
| chr28                 | 9525142 | 2 | 40 | G:0.675 A:0.325       |               |
| chr28                 | 9525692 | 2 | 40 | G:0.875 C:0.125       |               |
| chr28                 | 9525696 | 2 | 40 | C:0.45 T:0.55         |               |
| chr28                 | 9526115 | 2 | 38 | T:0.578947            | TA:0.421053   |
| chr28                 | 9526276 | 2 | 40 | G:1 A:0               |               |
| chr28                 | 9526780 | 2 | 34 | G:0.617647            | C:0.382353    |
| chr28                 | 9527150 | 2 | 36 | G:0.5 T:0.5           |               |
| chr28                 | 9527488 | 2 | 26 | A:0.153846            | C:0.846154    |
| chr28                 | 9527492 | 2 | 26 | C:0.153846            | A:0.846154    |
| chr28                 | 9527499 | 2 | 32 | A:0.125 AC:0.875      |               |
| chr28                 | 9527529 | 4 | 40 | GAAGAAAGA:0.825       | G:0.15 GAAGA: |
| 0.025 GAAGAAAGAAAGA:0 |         |   |    |                       |               |
| chr28                 | 9527537 | 2 | 40 | A:1 AAAG:0            |               |
| chr28                 | 9527764 | 2 | 34 | A:0.588235            | G:0.411765    |
| chr28                 | 9528033 | 2 | 38 | G:0.684211            | T:0.315789    |
| chr28                 | 9528160 | 2 | 36 | G:0.861111            | C:0.138889    |
| chr28                 | 9528182 | 3 | 36 | T:0.666667            | TA:0.333333   |
| TAA:0                 |         |   |    |                       |               |
| chr28                 | 9528207 | 2 | 38 | A:0.868421            | AAC:0.131579  |
| chr28                 | 9528208 | 2 | 38 | A:0.710526            | AC:0.289474   |
| chr28                 | 9528209 | 2 | 38 | A:0.710526            | AAAC:0.289474 |
| chr28                 | 9528216 | 2 | 38 | A:1 AC:0              |               |
| chr28                 | 9528253 | 2 | 38 | T:0.684211            | C:0.315789    |
| chr28                 | 9528902 | 2 | 36 | A:0.5 G:0.5           |               |
| chr28                 | 9529067 | 2 | 36 | C:0.388889            | T:0.611111    |

chr28 9529360 2 38 C:0.736842  
CACAGAGAAAGAGAGAGAGAGAGAGAGAGAGGCAGAGAGACA:0.263158  
chr28 9529491 2 30 G:0.5 GT:0.5  
chr28 9529511 2 30 CTTATATTTATTTT:0.833333 C:  
0.166667  
chr28 9529577 2 16 A:0.8125 AAG:0.1875  
chr28 9529688 2 38 G:0.552632 T:0.447368  
chr28 9529766 2 32 A:0.8125 ACC:0.1875  
chr28 9529773 2 32 T:0.46875 C:0.53125  
chr28 9530088 2 38 A:0.842105 G:0.157895  
chr28 9531740 2 36 T:0.583333 C:0.416667  
chr28 9532276 2 40 A:0.825 G:0.175  
chr28 9533095 2 38 A:0.473684 G:0.526316  
chr28 9533300 2 32 T:0.59375 G:0.40625  
chr28 9533491 2 38 A:0.868421 T:0.131579  
chr28 9533685 2 34 G:0.764706 T:0.235294  
chr28 9533715 2 36 T:1 C:0  
chr28 9533792 2 40 G:0.475 GT:0.525  
chr28 9533874 2 38 CT:0.605263 C:0.394737  
chr28 9534245 2 40 T:0.95 TA:0.05  
chr28 9534425 2 36 T:0.583333 C:0.416667  
chr28 9534450 3 38 CTTTTATTTTA:0.526316 C:  
0.447368 CTTTTA:0.0263158  
chr28 9534493 2 30 TTTTA:0.8 T:0.2  
chr28 9534662 2 32 C:0.625 T:0.375  
chr28 9534670 2 30 TTC:0.833333 T:0.166667  
chr28 9534691 2 26 T:0.538462 TTTTA:0.461538  
chr28 9534741 2 26 G:0.461538 C:0.538462  
chr28 9534747 2 28 G:0.785714 A:0.214286  
chr28 9535206 2 38 C:0.868421 T:0.131579  
chr28 9535650 2 34 A:0.529412 G:0.470588  
chr28 9535696 2 38 C:0.421053 T:0.578947  
chr28 9535967 2 34 T:0.529412 C:0.470588  
chr28 9536027 2 38 TC:1 T:0  
chr28 9536028 3 38 C:0.447368 CTT:0.105263  
CTTT:0.447368  
chr28 9536056 2 36 T:0.611111 G:0.388889  
chr28 9536195 2 30 C:0.433333 T:0.566667  
chr28 9536362 2 34 T:0.441176 C:0.558824  
chr28 9536624 3 34 TA:0.705882 T:0.0588235  
TAA:0.235294  
chr28 9537154 2 36 A:0.833333 AT:0.166667  
chr28 9537172 2 36 AAC:1 A:0  
chr28 9537354 2 34 T:1 A:0  
chr28 9537511 2 34 TA:0.911765 T:0.0882353  
chr28 9537555 2 36 A:0.888889 T:0.111111  
chr28 9537556 2 36 T:0.888889 G:0.111111  
chr28 9537565 2 36 A:0.888889 C:0.111111  
chr28 9537697 2 40 G:1 C:0  
chr28 9537699 2 40 G:0.525 A:0.475  
chr28 9537780 2 38 C:1 T:0  
chr28 9538134 2 40 T:0.875 TAAAAAAC:0.125  
chr28 9538161 2 40 TCA:0.875 T:0.125  
chr28 9538230 2 38 C:0.868421 G:0.131579

|                                |         |   |    |                      |                 |
|--------------------------------|---------|---|----|----------------------|-----------------|
| chr28                          | 9538320 | 2 | 32 | A:0.90625            | AG:0.09375      |
| chr28                          | 9538380 | 2 | 26 | G:0.961538           | C:0.0384615     |
| chr28                          | 9538530 | 2 | 36 | A:0.805556           | G:0.194444      |
| chr28                          | 9538894 | 2 | 28 | CG:0.821429          | C:0.178571      |
| chr28                          | 9539003 | 2 | 34 | C:0.911765           | G:0.0882353     |
| chr28                          | 9539029 | 2 | 34 | G:0.882353           | T:0.117647      |
| chr28                          | 9539131 | 2 | 40 | G:0.825 C:0.175      |                 |
| chr28                          | 9539496 | 2 | 38 | A:0.973684           | G:0.0263158     |
| chr28                          | 9539650 | 2 | 40 | C:1 CTCTA:0          |                 |
| chr28                          | 9539693 | 2 | 34 | A:0.882353           | T:0.117647      |
| chr28                          | 9539856 | 2 | 32 | A:0.90625            | G:0.09375       |
| chr28                          | 9539946 | 2 | 36 | C:0.805556           | T:0.194444      |
| chr28                          | 9540151 | 2 | 36 | G:0.833333           | A:0.166667      |
| chr28                          | 9540383 | 2 | 36 | T:0.888889           | TA:0.111111     |
| chr28                          | 9540981 | 2 | 40 | C:1 T:0              |                 |
| chr28                          | 9542285 | 2 | 40 | G:0.875 C:0.125      |                 |
| chr28                          | 9542524 | 2 | 38 | C:1 G:0              |                 |
| chr28                          | 9542826 | 2 | 36 | G:0.805556           | C:0.194444      |
| chr28                          | 9543002 | 2 | 38 | G:0.710526           | T:0.289474      |
| chr28                          | 9543081 | 2 | 38 | G:0.710526           | C:0.289474      |
| chr28                          | 9543089 | 2 | 38 | T:1 TGTG:0           |                 |
| chr28                          | 9543110 | 2 | 36 | GGT:0.888889         | G:0.111111      |
| chr28                          | 9543112 | 2 | 40 | T:0.8 TGGTG:0.2      |                 |
| chr28                          | 9543441 | 2 | 38 | CCCTCTA:0.842105     | C:0.157895      |
| chr28                          | 9543447 | 2 | 38 | A:0.842105           | C:0.157895      |
| chr28                          | 9543483 | 2 | 36 | TCTCA:0.805556       | T:0.194444      |
| chr28                          | 9543487 | 2 | 36 | A:0.861111           | T:0.138889      |
| chr28                          | 9543735 | 2 | 38 | C:0.736842           | T:0.263158      |
| chr28                          | 9543860 | 3 | 38 | AACACACACAC:0.842105 | A:              |
| 0.131579 AACACACACAC:0.0263158 |         |   |    |                      |                 |
| chr28                          | 9544056 | 2 | 36 | A:0.666667           | AT:0.333333     |
| chr28                          | 9544375 | 2 | 38 | G:0.868421           | C:0.131579      |
| chr28                          | 9544725 | 2 | 34 | C:0.764706           | CT:0.235294     |
| chr28                          | 9544848 | 2 | 38 | G:1 GTCA:0           |                 |
| chr28                          | 9545657 | 2 | 32 | G:0.75 GC:0.25       |                 |
| chr28                          | 9545740 | 2 | 36 | G:0.861111           | A:0.138889      |
| chr28                          | 9546080 | 2 | 36 | C:0.75 CTAAA:0.25    |                 |
| chr28                          | 9546249 | 2 | 36 | T:0.861111           | A:0.138889      |
| chr28                          | 9546401 | 2 | 38 | G:0.684211           | T:0.315789      |
| chr28                          | 9547729 | 2 | 34 | G:1 A:0              |                 |
| chr28                          | 9547754 | 2 | 38 | G:0.631579           | GAACTT:0.368421 |
| chr28                          | 9547967 | 2 | 36 | T:0.888889           | C:0.111111      |
| chr28                          | 9548836 | 2 | 38 | G:1 T:0              |                 |
| chr28                          | 9548879 | 2 | 38 | C:0.973684           | CCT:0.0263158   |
| chr28                          | 9548927 | 2 | 34 | T:0.764706           | TA:0.235294     |
| chr28                          | 9549186 | 2 | 38 | TAA:0.763158         | T:0.236842      |
| chr28                          | 9549260 | 2 | 36 | C:1 T:0              |                 |
| chr28                          | 9549466 | 2 | 40 | T:0.725 G:0.275      |                 |
| chr28                          | 9549533 | 2 | 36 | A:0.833333           | G:0.166667      |
| chr28                          | 9549617 | 2 | 38 | T:0.868421           | G:0.131579      |
| chr28                          | 9550879 | 3 | 32 | GAA:0.78125          | G:0.125 GA:     |
| 0.09375                        |         |   |    |                      |                 |
| chr28                          | 9550955 | 2 | 34 | T:0.764706           | G:0.235294      |
| chr28                          | 9551321 | 2 | 36 | AT:0.916667          | A:0.0833333     |



|                                                          |         |   |    |                             |                |
|----------------------------------------------------------|---------|---|----|-----------------------------|----------------|
| chr28                                                    | 9551324 | 2 | 36 | T:0.0833333                 | A:0.916667     |
| chr28                                                    | 9551336 | 2 | 36 | C:0.916667                  | T:0.0833333    |
| chr28                                                    | 9551751 | 2 | 36 | A:0.861111                  | G:0.138889     |
| chr28                                                    | 9552058 | 2 | 38 | G:1                         | A:0            |
| chr28                                                    | 9552210 | 2 | 36 | A:1                         | G:0            |
| chr28                                                    | 9552368 | 2 | 40 | A:0.9                       | G:0.1          |
| chr28                                                    | 9552896 | 2 | 38 | GA:0.894737                 | G:0.105263     |
| chr28                                                    | 9552963 | 2 | 36 | T:0.722222                  | C:0.277778     |
| chr28                                                    | 9553043 | 2 | 38 | C:0.842105                  | CCTCT:0.157895 |
| chr28                                                    | 9553084 | 2 | 36 | T:0.916667                  | TA:0.0833333   |
| chr28                                                    | 9553085 | 2 | 36 | A:1                         | T:0            |
| chr28                                                    | 9553087 | 2 | 36 | A:1                         | AT:0           |
| chr28                                                    | 9553185 | 2 | 38 | ATTCTT:0.868421             | A:0.131579     |
| chr28                                                    | 9553297 | 2 | 38 | CAT:1                       | C:0            |
| chr28                                                    | 9553608 | 2 | 38 | G:0.710526                  | A:0.289474     |
| chr28                                                    | 9553743 | 2 | 38 | TA:0.815789                 | T:0.184211     |
| chr28                                                    | 9554716 | 2 | 38 | T:1                         | G:0            |
| chr28                                                    | 9555719 | 2 | 36 | A:0.861111                  | C:0.138889     |
| chr28                                                    | 9556220 | 3 | 36 | TA:0.888889                 | T:0.0555556    |
| TAA:0.0555556                                            |         |   |    |                             |                |
| chr28                                                    | 9556926 | 2 | 34 | C:0.911765                  | G:0.0882353    |
| chr28                                                    | 9557108 | 2 | 38 | A:1                         | T:0            |
| chr28                                                    | 9557190 | 2 | 40 | T:0.4                       | C:0.6          |
| chr28                                                    | 9557298 | 2 | 38 | A:0.894737                  | T:0.105263     |
| chr28                                                    | 9557305 | 2 | 38 | T:0.894737                  | A:0.105263     |
| chr28                                                    | 9557451 | 2 | 40 | C:1                         | T:0            |
| chr28                                                    | 9558305 | 2 | 36 | AAGAT:1                     | A:0            |
| chr28                                                    | 9558311 | 3 | 40 | G:0.275                     | T:0.25         |
| GATTTATTTATTTATTT:0.475                                  |         |   |    |                             |                |
| chr28                                                    | 9558838 | 2 | 36 | T:0.805556                  | C:0.194444     |
| chr28                                                    | 9559014 | 2 | 34 | G:0.823529                  | GA:0.176471    |
| chr28                                                    | 9559483 | 2 | 34 | G:0.441176                  | A:0.558824     |
| chr28                                                    | 9559536 | 6 | 38 |                             |                |
| ATTTCTTTTCTTTTCTTTTCTTTTCTTTTCT:0.342105                 |         |   |    |                             |                |
| ATTTCT:0                                                 |         |   |    |                             |                |
| ATTTCTTTTCTTTTCT:0.0789474                               |         |   |    |                             |                |
| ATTTCTTTTCTTTTCTTTTCT:0.263158                           |         |   |    |                             |                |
| chr28                                                    | 9559552 | 2 | 38 | TTTCTTTTCTTTTCTTTTCTTTTCT:1 |                |
| T:0                                                      |         |   |    |                             |                |
| chr28                                                    | 9560695 | 2 | 38 | A:0.815789                  | G:0.184211     |
| chr28                                                    | 9560734 | 2 | 30 | C:0.9                       | T:0.1          |
| chr28                                                    | 9561005 | 2 | 38 | G:0.473684                  | GAA:0.526316   |
| chr28                                                    | 9561271 | 2 | 34 | T:0.529412                  | C:0.470588     |
| chr28                                                    | 9561290 | 2 | 38 | G:0.842105                  | A:0.157895     |
| chr28                                                    | 9561550 | 2 | 40 | G:0.825                     | A:0.175        |
| chr28                                                    | 9561952 | 2 | 36 | C:0.416667                  | CCT:0.583333   |
| chr28                                                    | 9561991 | 2 | 34 | T:0.529412                  | A:0.470588     |
| chr28                                                    | 9561992 | 2 | 34 | T:0.529412                  | A:0.470588     |
| chr28                                                    | 9562048 | 2 | 40 | T:0.8                       |                |
| TAAGCGTCTGACTCTTAAAAATAAAAAAAAAAATAAATAAATAAAAAAAAAA:0.2 |         |   |    |                             |                |
| chr28                                                    | 9562139 | 3 | 32 | TAAAAA:0.40625              | T:0.40625      |
| TAAAA:0.1875                                             |         |   |    |                             |                |
| chr28                                                    | 9562141 | 2 | 30 | A:0.8                       | T:0.2          |
| chr28                                                    | 9562226 | 2 | 40 | C:0.925                     | T:0.075        |
| chr28                                                    | 9562307 | 2 | 36 | A:0.861111                  | G:0.138889     |

|             |         |   |              |                                 |         |                  |
|-------------|---------|---|--------------|---------------------------------|---------|------------------|
| chr28       | 9562854 | 2 | 24           | GTC:1                           | G:0     |                  |
| chr28       | 9562963 | 2 | 34           | C:0.470588                      |         | T:0.529412       |
| chr28       | 9563089 | 2 | 36           | ACTTC:1                         | A:0     |                  |
| chr28       | 9563094 | 2 | 36           | T:1                             | G:0     |                  |
| chr28       | 9563687 | 2 | 36           | T:0.333333                      |         | C:0.666667       |
| chr28       | 9563689 | 2 | 36           | T:1                             | C:0     |                  |
| chr28       | 9563728 | 2 | 38           | G:1                             | A:0     |                  |
| chr28       | 9563806 | 2 | 38           | C:0.342105                      |         | T:0.657895       |
| chr28       | 9563872 | 2 | 34           | A:0.294118                      |         | G:0.705882       |
| chr28       | 9563966 | 2 | 40           | T:0.4                           | C:0.6   |                  |
| chr28       | 9564087 | 2 | 32           | T:0.25                          | A:0.75  |                  |
| chr28       | 9564157 | 4 | 38           | CATATATATATATATATATAT:0.263158  |         |                  |
| C:0.447368  |         |   | CAT:0.210526 | CATATATATATATATATATAT:0.0789474 |         |                  |
| chr28       | 9564232 | 2 | 40           | A:0.35                          | G:0.65  |                  |
| chr28       | 9564455 | 2 | 40           | C:0.375                         | A:0.625 |                  |
| chr28       | 9564517 | 2 | 40           | C:0.375                         | T:0.625 |                  |
| chr28       | 9564662 | 2 | 38           | ATACC:0.447368                  |         | A:0.552632       |
| chr28       | 9564839 | 2 | 38           | A:0.710526                      |         | ATCTC:0.289474   |
| chr28       | 9564860 | 2 | 38           | T:0.684211                      |         | TC:0.315789      |
| chr28       | 9564863 | 2 | 38           | T:0.684211                      |         | TTC:0.315789     |
| chr28       | 9564880 | 2 | 36           | C:0.722222                      |         | T:0.277778       |
| chr28       | 9564988 | 2 | 34           | C:0.382353                      |         | T:0.617647       |
| chr28       | 9565137 | 2 | 40           | G:0.375                         | A:0.625 |                  |
| chr28       | 9565255 | 2 | 40           | T:1                             | G:0     |                  |
| chr28       | 9565492 | 2 | 40           | T:0.4                           | A:0.6   |                  |
| chr28       | 9565976 | 2 | 36           | CT:0.666667                     |         | C:0.333333       |
| chr28       | 9566010 | 2 | 40           | C:0.45                          | T:0.55  |                  |
| chr28       | 9566172 | 2 | 36           | CTTCCTAT:0.722222               |         | C:               |
| 0.277778    |         |   |              |                                 |         |                  |
| chr28       | 9566326 | 2 | 40           | T:0.675                         | C:0.325 |                  |
| chr28       | 9566408 | 2 | 36           | T:0.333333                      |         | C:0.666667       |
| chr28       | 9566466 | 2 | 36           | T:1                             | C:0     |                  |
| chr28       | 9566635 | 2 | 30           | CT:0.733333                     |         | C:0.266667       |
| chr28       | 9566638 | 2 | 34           | T:0.794118                      |         | C:0.205882       |
| chr28       | 9566641 | 3 | 34           | T:0.676471                      |         | TTTTTC:0.323529  |
| TTTTTC:0    |         |   |              |                                 |         |                  |
| chr28       | 9566845 | 2 | 34           | A:0.441176                      |         | T:0.558824       |
| chr28       | 9566980 | 3 | 36           | CAA:0.388889                    |         | C:0.222222       |
| CA:0.388889 |         |   |              |                                 |         |                  |
| chr28       | 9567018 | 2 | 36           | C:0.361111                      |         | T:0.638889       |
| chr28       | 9567089 | 2 | 36           | A:0.305556                      |         | G:0.694444       |
| chr28       | 9567242 | 2 | 38           | C:0.394737                      |         | T:0.605263       |
| chr28       | 9567334 | 2 | 36           | T:0.388889                      |         | G:0.611111       |
| chr28       | 9567374 | 2 | 34           | T:0.441176                      |         | TAAAAAA:0.558824 |
| chr28       | 9567491 | 2 | 34           | A:0.294118                      |         | T:0.705882       |
| chr28       | 9567567 | 2 | 40           | A:0.375                         | G:0.625 |                  |
| chr28       | 9567838 | 2 | 40           | T:0.625                         | C:0.375 |                  |
| chr28       | 9568410 | 2 | 40           | C:0.65                          | T:0.35  |                  |
| chr28       | 9568453 | 2 | 38           | A:0.5                           | C:0.5   |                  |
| chr28       | 9568758 | 2 | 34           | T:0.705882                      |         | G:0.294118       |
| chr28       | 9568823 | 2 | 36           | T:0.444444                      |         | C:0.555556       |
| chr28       | 9568867 | 2 | 32           | T:0.96875                       |         | A:0.03125        |
| chr28       | 9568868 | 2 | 34           | A:0.676471                      |         | T:0.323529       |
| chr28       | 9568876 | 2 | 34           | A:0.676471                      |         | T:0.323529       |

|                             |         |   |    |                 |                  |
|-----------------------------|---------|---|----|-----------------|------------------|
| chr28                       | 9568938 | 2 | 38 | TAC:0.605263    | T:0.394737       |
| chr28                       | 9569039 | 2 | 32 | C:0.6875        | CAT:0.3125       |
| chr28                       | 9569139 | 2 | 38 | A:1             | G:0              |
| chr28                       | 9569192 | 2 | 34 | A:0.705882      | AG:0.294118      |
| chr28                       | 9569449 | 2 | 38 | T:0.578947      | C:0.421053       |
| chr28                       | 9569456 | 2 | 38 | T:0.578947      | C:0.421053       |
| chr28                       | 9569549 | 2 | 38 | A:0.631579      | T:0.368421       |
| chr28                       | 9569567 | 2 | 38 | A:0.473684      | G:0.526316       |
| chr28                       | 9569730 | 2 | 38 | A:0.605263      | G:0.394737       |
| chr28                       | 9569792 | 2 | 32 | C:0.71875       | T:0.28125        |
| chr28                       | 9569865 | 2 | 34 | T:1             | TA:0             |
| chr28                       | 9569873 | 3 | 38 | A:0.473684      | AAAG:0.342105    |
| AAAAAAG:0.184211            |         |   |    |                 |                  |
| chr28                       | 9569932 | 2 | 38 | T:0.684211      | G:0.315789       |
| chr28                       | 9569936 | 2 | 38 | T:0.684211      | C:0.315789       |
| chr28                       | 9570043 | 2 | 36 | T:0.722222      | A:0.277778       |
| chr28                       | 9570739 | 2 | 32 | T:0.40625       | TA:0.59375       |
| chr28                       | 9570895 | 2 | 36 | C:0.583333      | T:0.416667       |
| chr28                       | 9571027 | 2 | 38 | T:0.710526      | A:0.289474       |
| chr28                       | 9571090 | 2 | 38 | A:0.684211      | T:0.315789       |
| chr28                       | 9571210 | 2 | 36 | C:0.638889      | T:0.361111       |
| chr28                       | 9571231 | 2 | 36 | TA:0.694444     | T:0.305556       |
| chr28                       | 9571414 | 2 | 36 | T:0.444444      | G:0.555556       |
| chr28                       | 9571507 | 2 | 38 | A:0.473684      | G:0.526316       |
| chr28                       | 9571879 | 2 | 30 | A:0.466667      | T:0.533333       |
| chr28                       | 9572284 | 2 | 36 | TCAG:0.75       | T:0.25           |
| chr28                       | 9572372 | 4 | 26 | AG:0.423077     | A:0.423077       |
| AGG:0.0384615 AGGG:0.115385 |         |   |    |                 |                  |
| chr28                       | 9574033 | 2 | 36 | G:0.666667      | T:0.333333       |
| chr28                       | 9574255 | 2 | 36 | G:0.611111      | T:0.388889       |
| chr28                       | 9574382 | 2 | 40 | G:0.675         | C:0.325          |
| chr28                       | 9574497 | 2 | 38 | G:0.605263      | GT:0.394737      |
| chr28                       | 9574508 | 2 | 38 | T:0.605263      | TTTA:0.394737    |
| chr28                       | 9574595 | 2 | 38 | C:0.710526      | T:0.289474       |
| chr28                       | 9574685 | 2 | 38 | C:0.578947      | T:0.421053       |
| chr28                       | 9574911 | 2 | 36 | G:0.638889      | T:0.361111       |
| chr28                       | 9575111 | 2 | 40 | T:0.125         | TG:0.875         |
| chr28                       | 9575539 | 2 | 40 | T:0.65          | TC:0.35          |
| chr28                       | 9575563 | 2 | 40 | G:0.65          | T:0.35           |
| chr28                       | 9575754 | 2 | 36 | A:1             | G:0              |
| chr28                       | 9575783 | 2 | 38 | A:0.973684      | T:0.0263158      |
| chr28                       | 9576019 | 2 | 38 | A:0.684211      | T:0.315789       |
| chr28                       | 9576029 | 2 | 38 | A:0.684211      | T:0.315789       |
| chr28                       | 9576357 | 2 | 36 | T:0.694444      | G:0.305556       |
| chr28                       | 9576358 | 2 | 36 | T:0.694444      | C:0.305556       |
| chr28                       | 9576589 | 2 | 38 | G:0.657895      | A:0.342105       |
| chr28                       | 9576677 | 2 | 40 | C:0.475         | G:0.525          |
| chr28                       | 9577179 | 2 | 34 | ATAAAG:0.588235 | A:0.411765       |
| chr28                       | 9577329 | 2 | 20 | TG:0.25         | T:0.75           |
| chr28                       | 9577593 | 2 | 38 | A:1             | G:0              |
| chr28                       | 9577819 | 2 | 38 | A:1             | G:0              |
| chr28                       | 9577997 | 2 | 34 | C:0.529412      | T:0.470588       |
| chr28                       | 9578021 | 2 | 38 | C:0.921053      | CGGG:0.0789474   |
| chr28                       | 9578022 | 2 | 38 | A:0.921053      | ATCCCTGGGTGGCGC: |

0.0789474

|                                       |         |   |    |                |                        |
|---------------------------------------|---------|---|----|----------------|------------------------|
| chr28                                 | 9578024 | 2 | 38 | G:0.921053     |                        |
| GCGGTTTGCGCCTGCCT:0.0789474           |         |   |    |                |                        |
| chr28                                 | 9578050 | 2 | 34 | G:0.705882     | A:0.294118             |
| chr28                                 | 9578247 | 2 | 34 | A:0.735294     | G:0.264706             |
| chr28                                 | 9578336 | 2 | 40 | A:0.675        |                        |
| ATTATCTTTATTATTTTCTTTTTTTTTTTTT:0.325 |         |   |    |                |                        |
| chr28                                 | 9578932 | 2 | 34 | T:0.705882     | G:0.294118             |
| chr28                                 | 9579011 | 2 | 40 | A:0.7          | ATATAGAATATATGTCAT:0.3 |
| chr28                                 | 9579015 | 2 | 40 | A:0.7          | ATAT:0.3               |
| chr28                                 | 9579016 | 2 | 40 | C:0.7          | G:0.3                  |
| chr28                                 | 9579207 | 2 | 36 | G:0.611111     | A:0.388889             |
| chr28                                 | 9579410 | 2 | 36 | C:1            | T:0                    |
| chr28                                 | 9579440 | 2 | 36 | T:0.722222     | C:0.277778             |
| chr28                                 | 9579871 | 2 | 32 | G:0.75         | T:0.25                 |
| chr28                                 | 9580107 | 2 | 40 | A:0.775        | G:0.225                |
| chr28                                 | 9580128 | 2 | 40 | C:0.5          | T:0.5                  |
| chr28                                 | 9580216 | 2 | 38 | G:0.421053     | A:0.578947             |
| chr28                                 | 9580396 | 2 | 38 | T:0.736842     | G:0.263158             |
| chr28                                 | 9580457 | 2 | 38 | G:0.657895     | A:0.342105             |
| chr28                                 | 9580922 | 2 | 36 | A:0.638889     | AT:0.361111            |
| chr28                                 | 9580931 | 2 | 38 | C:0.684211     | CCA:0.315789           |
| chr28                                 | 9581200 | 2 | 32 | TA:0.65625     | T:0.34375              |
| chr28                                 | 9581214 | 2 | 36 | AT:1           | A:0                    |
| chr28                                 | 9581215 | 2 | 36 | T:0.861111     | A:0.138889             |
| chr28                                 | 9581374 | 2 | 36 | G:0.638889     | A:0.361111             |
| chr28                                 | 9581495 | 2 | 32 | G:1            | A:0                    |
| chr28                                 | 9581533 | 2 | 34 | G:0.705882     | A:0.294118             |
| chr28                                 | 9581568 | 2 | 32 | G:0.78125      | A:0.21875              |
| chr28                                 | 9581640 | 2 | 34 | T:0.558824     | C:0.441176             |
| chr28                                 | 9581651 | 2 | 36 | C:0.0555556    | T:0.944444             |
| chr28                                 | 9581821 | 2 | 32 | G:0.71875      | A:0.28125              |
| chr28                                 | 9581918 | 2 | 38 | A:0.605263     | G:0.394737             |
| chr28                                 | 9582135 | 2 | 32 | T:0.65625      | C:0.34375              |
| chr28                                 | 9582608 | 2 | 36 | A:0.611111     | G:0.388889             |
| chr28                                 | 9582966 | 2 | 38 | A:0.684211     | AT:0.315789            |
| chr28                                 | 9582975 | 2 | 38 | G:0.684211     | A:0.315789             |
| chr28                                 | 9582976 | 2 | 38 | C:0.842105     | CT:0.157895            |
| chr28                                 | 9582986 | 2 | 38 | T:0.684211     | TA:0.315789            |
| chr28                                 | 9583014 | 2 | 38 | TGAGA:0.842105 | T:0.157895             |
| chr28                                 | 9583915 | 2 | 36 | A:0.888889     | AGT:0.111111           |
| chr28                                 | 9584159 | 2 | 36 | G:0.916667     | GC:0.0833333           |
| chr28                                 | 9584161 | 2 | 36 | G:0.916667     | A:0.0833333            |
| chr28                                 | 9584202 | 2 | 36 | A:0.25         | G:0.75                 |
| chr28                                 | 9584260 | 2 | 28 | G:1            | GTC:0                  |
| chr28                                 | 9584262 | 2 | 34 | C:0.764706     | CTA:0.235294           |
| chr28                                 | 9585083 | 2 | 36 | G:0.666667     | A:0.333333             |
| chr28                                 | 9585095 | 2 | 36 | A:0.666667     | G:0.333333             |
| chr28                                 | 9585230 | 2 | 38 | C:0.131579     | T:0.868421             |
| chr28                                 | 9585360 | 2 | 34 | G:0.588235     | GT:0.411765            |
| chr28                                 | 9586291 | 2 | 40 | A:0.7          | G:0.3                  |
| chr28                                 | 9586670 | 2 | 36 | G:1            | A:0                    |
| chr28                                 | 9587213 | 2 | 38 | C:0.710526     | CT:0.289474            |
| chr28                                 | 9587279 | 2 | 38 | T:0.736842     | C:0.263158             |

|          |         |   |    |               |                |          |
|----------|---------|---|----|---------------|----------------|----------|
| chr28    | 9587607 | 2 | 38 | C:0.631579    | G:0.368421     |          |
| chr28    | 9587634 | 2 | 38 | T:0.868421    | C:0.131579     |          |
| chr28    | 9587706 | 2 | 36 | G:0.583333    | GT:0.416667    |          |
| chr28    | 9588002 | 2 | 34 | C:0.647059    | T:0.352941     |          |
| chr28    | 9588003 | 2 | 34 | A:0.647059    | G:0.352941     |          |
| chr28    | 9589333 | 2 | 36 | G:0.638889    | A:0.361111     |          |
| chr28    | 9590225 | 2 | 36 | G:0.472222    | A:0.527778     |          |
| chr28    | 9590592 | 2 | 38 | G:0.710526    | T:0.289474     |          |
| chr28    | 9590966 | 2 | 38 | A:0.473684    | G:0.526316     |          |
| chr28    | 9591226 | 3 | 34 | GTA:0.5       | G:0.147059     | GTATATA: |
| 0.352941 |         |   |    |               |                |          |
| chr28    | 9591411 | 2 | 32 | A:0.4375      | T:0.5625       |          |
| chr28    | 9591551 | 2 | 38 | C:0.710526    | T:0.289474     |          |
| chr28    | 9591697 | 2 | 40 | A:0.675       | C:0.325        |          |
| chr28    | 9591720 | 2 | 38 | C:0.868421    | T:0.131579     |          |
| chr28    | 9591912 | 2 | 40 | A:0.7         | AG:0.3         |          |
| chr28    | 9591913 | 3 | 40 | AT:0.375      | A:0.325        | TT:0.3   |
| chr28    | 9592007 | 2 | 38 | G:0.815789    | A:0.184211     |          |
| chr28    | 9592121 | 2 | 36 | C:0.805556    | T:0.194444     |          |
| chr28    | 9592682 | 2 | 38 | G:0.684211    | GT:0.315789    |          |
| chr28    | 9593230 | 2 | 40 | T:0.425       | C:0.575        |          |
| chr28    | 9593310 | 2 | 36 | C:0.694444    | T:0.305556     |          |
| chr28    | 9593919 | 2 | 38 | C:0.605263    | G:0.394737     |          |
| chr28    | 9593973 | 2 | 40 | T:1           | C:0            |          |
| chr28    | 9594038 | 2 | 36 | G:0.666667    | A:0.333333     |          |
| chr28    | 9595125 | 2 | 36 | T:0.722222    | C:0.277778     |          |
| chr28    | 9595450 | 2 | 38 | G:1           | T:0            |          |
| chr28    | 9595656 | 2 | 36 | T:0.611111    | C:0.388889     |          |
| chr28    | 9596638 | 2 | 40 | T:0.475       | C:0.525        |          |
| chr28    | 9596694 | 2 | 36 | G:0.972222    | A:0.0277778    |          |
| chr28    | 9597063 | 2 | 40 | T:1           | C:0            |          |
| chr28    | 9599398 | 2 | 32 | A:0.59375     | AT:0.40625     |          |
| chr28    | 9599515 | 2 | 38 | C:0.526316    | T:0.473684     |          |
| chr28    | 9599719 | 2 | 36 | C:0.888889    | T:0.111111     |          |
| chr28    | 9599929 | 2 | 34 | G:1           | A:0            |          |
| chr28    | 9599962 | 3 | 30 | CT:0.3        | C:0.266667     | CTT:     |
| 0.433333 |         |   |    |               |                |          |
| chr28    | 9600142 | 2 | 36 | G:0.638889    | GAA:0.361111   |          |
| chr28    | 9600972 | 2 | 38 | G:0.789474    | A:0.210526     |          |
| chr28    | 9601336 | 2 | 36 | T:0.777778    | C:0.222222     |          |
| chr28    | 9601346 | 2 | 34 | G:0.382353    | GTTT:0.617647  |          |
| chr28    | 9601688 | 2 | 38 | A:1           | T:0            |          |
| chr28    | 9601819 | 2 | 40 | C:0.725       | CT:0.275       |          |
| chr28    | 9602071 | 2 | 36 | G:0.888889    | T:0.111111     |          |
| chr28    | 9602515 | 2 | 38 | C:0.210526    | CAGAG:0.789474 |          |
| chr28    | 9602556 | 2 | 36 | T:0.138889    | C:0.861111     |          |
| chr28    | 9602709 | 2 | 36 | G:0.694444    | T:0.305556     |          |
| chr28    | 9602781 | 2 | 40 | G:0.65        | A:0.35         |          |
| chr28    | 9603071 | 2 | 40 | G:0.725       | A:0.275        |          |
| chr28    | 9603595 | 2 | 32 | C:0.78125     | T:0.21875      |          |
| chr28    | 9603705 | 2 | 40 | CAAATGT:0.675 | C:0.325        |          |
| chr28    | 9603737 | 2 | 40 | G:0.125       | A:0.875        |          |
| chr28    | 9603866 | 2 | 30 | A:0.6         | G:0.4          |          |
| chr28    | 9604113 | 2 | 34 | C:0.676471    | CAAT:0.323529  |          |

|              |         |   |    |                  |                |
|--------------|---------|---|----|------------------|----------------|
| chr28        | 9604502 | 2 | 38 | C:0.657895       | T:0.342105     |
| chr28        | 9604526 | 2 | 36 | C:0.555556       | G:0.444444     |
| chr28        | 9604595 | 2 | 36 | A:0.861111       | AT:0.138889    |
| chr28        | 9604900 | 2 | 40 | C:0.075 T:0.925  |                |
| chr28        | 9604964 | 2 | 36 | A:0.166667       | AATT:0.833333  |
| chr28        | 9605189 | 2 | 36 | T:0.666667       | C:0.333333     |
| chr28        | 9605274 | 2 | 38 | C:0.631579       | T:0.368421     |
| chr28        | 9605900 | 2 | 38 | A:1 G:0          |                |
| chr28        | 9606015 | 2 | 38 | A:1 G:0          |                |
| chr28        | 9606378 | 2 | 38 | A:0.868421       | C:0.131579     |
| chr28        | 9607071 | 2 | 40 | A:0.15 G:0.85    |                |
| chr28        | 9607195 | 2 | 38 | G:0.684211       | A:0.315789     |
| chr28        | 9607695 | 2 | 40 | T:0.925 TG:0.075 |                |
| chr28        | 9608901 | 2 | 40 | C:0.6 T:0.4      |                |
| chr28        | 9609333 | 2 | 36 | C:0.888889       | T:0.111111     |
| chr28        | 9609384 | 2 | 40 | A:0.9 G:0.1      |                |
| chr28        | 9609453 | 2 | 38 | AG:0.894737      | A:0.105263     |
| chr28        | 9609874 | 2 | 38 | T:0.631579       | C:0.368421     |
| chr28        | 9609894 | 2 | 36 | G:0.694444       | A:0.305556     |
| chr28        | 9609925 | 2 | 38 | C:0.131579       | CAAAT:0.868421 |
| chr28        | 9610424 | 2 | 36 | C:0.638889       | G:0.361111     |
| chr28        | 9610717 | 2 | 36 | T:0.583333       | A:0.416667     |
| chr28        | 9610718 | 3 | 36 | T:0.416667       | A:0.416667     |
| TA:0.166667  |         |   |    |                  |                |
| chr28        | 9610948 | 2 | 34 | A:0.176471       | T:0.823529     |
| chr28        | 9611116 | 2 | 26 | C:0.115385       | CTT:0.884615   |
| chr28        | 9612034 | 2 | 38 | G:0.710526       | A:0.289474     |
| chr28        | 9612691 | 2 | 36 | G:0.638889       | A:0.361111     |
| chr28        | 9612988 | 2 | 34 | G:0.852941       | A:0.147059     |
| chr28        | 9613566 | 2 | 36 | C:0.583333       | CT:0.416667    |
| chr28        | 9614922 | 2 | 40 | ACTTT:0.55       | A:0.45         |
| chr28        | 9615103 | 2 | 36 | C:0.555556       | G:0.444444     |
| chr28        | 9615195 | 3 | 38 | G:0.684211       | GA:0.131579    |
| GAA:0.184211 |         |   |    |                  |                |
| chr28        | 9615206 | 2 | 38 | C:0.710526       | A:0.289474     |
| chr28        | 9615427 | 2 | 36 | T:0.888889       | C:0.111111     |
| chr28        | 9615564 | 2 | 38 | T:0.842105       | G:0.157895     |
| chr28        | 9616775 | 2 | 38 | A:0.789474       | C:0.210526     |
| chr28        | 9616846 | 2 | 40 | A:0.975 C:0.025  |                |
| chr28        | 9616922 | 2 | 28 | TA:0.392857      | T:0.607143     |
| chr28        | 9616934 | 2 | 28 | A:0.392857       | C:0.607143     |
| chr28        | 9617161 | 2 | 34 | T:0.558824       | C:0.441176     |
| chr28        | 9617887 | 2 | 34 | C:0.823529       | T:0.176471     |
| chr28        | 9618073 | 2 | 38 | A:0.526316       | T:0.473684     |
| chr28        | 9619536 | 2 | 38 | A:0.631579       | G:0.368421     |
| chr28        | 9620179 | 2 | 40 | AG:0.15 A:0.85   |                |
| chr28        | 9620202 | 2 | 40 | G:0.975 A:0.025  |                |
| chr28        | 9620729 | 2 | 38 | A:0.447368       | T:0.552632     |
| chr28        | 9620950 | 2 | 36 | T:0.138889       | C:0.861111     |
| chr28        | 9621608 | 2 | 38 | C:1 T:0          |                |
| chr28        | 9622738 | 2 | 40 | ATT:1 A:0        |                |
| chr28        | 9623784 | 2 | 40 | A:0.425 G:0.575  |                |
| chr28        | 9623870 | 2 | 38 | A:1 G:0          |                |
| chr28        | 9624327 | 2 | 36 | C:0.361111       | T:0.638889     |

|                      |         |   |    |                     |            |                |
|----------------------|---------|---|----|---------------------|------------|----------------|
| chr28                | 9624715 | 2 | 40 | A:0.825             | G:0.175    |                |
| chr28                | 9625347 | 2 | 38 | T:0.131579          |            | C:0.868421     |
| chr28                | 9625621 | 2 | 34 | A:0.558824          |            | G:0.441176     |
| chr28                | 9626145 | 2 | 34 | TG:1                | T:0        |                |
| chr28                | 9626211 | 2 | 34 | T:1                 | C:0        |                |
| chr28                | 9627016 | 2 | 38 | A:1                 | C:0        |                |
| chr28                | 9627355 | 2 | 38 | C:0.210526          |            | A:0.789474     |
| chr28                | 9628345 | 2 | 32 | C:0.9375            | T:0.0625   |                |
| chr28                | 9629034 | 2 | 38 | A:0.131579          |            | T:0.868421     |
| chr28                | 9630247 | 2 | 40 | A:0.65              | AAG:0.35   |                |
| chr28                | 9630576 | 2 | 32 | C:0.1875            | CAT:0.8125 |                |
| chr28                | 9630904 | 2 | 38 | A:0.421053          |            | G:0.578947     |
| chr28                | 9630930 | 2 | 38 | C:1                 | T:0        |                |
| chr28                | 9630936 | 2 | 38 | A:0.868421          |            | T:0.131579     |
| chr28                | 9631549 | 2 | 40 | A:0.15              | T:0.85     |                |
| chr28                | 9632064 | 2 | 40 | CT:1                | C:0        |                |
| chr28                | 9632137 | 4 | 40 | G:0.475             | GCATT:0.05 |                |
| GCATTCATT:0.25       |         |   |    | GCATTCATTCATT:0.225 |            |                |
| chr28                | 9632654 | 2 | 38 | G:0.605263          |            | A:0.394737     |
| chr28                | 9632733 | 2 | 36 | A:0.194444          |            | ATCTG:0.805556 |
| chr28                | 9632756 | 2 | 38 | TGGCTACAG:0.763158  |            | T:             |
| 0.236842             |         |   |    |                     |            |                |
| chr28                | 9632783 | 2 | 36 | G:1                 | A:0        |                |
| chr28                | 9632961 | 2 | 36 | T:1                 | TTTTG:0    |                |
| chr28                | 9633726 | 2 | 36 | C:0.138889          |            | T:0.861111     |
| chr28                | 9633821 | 2 | 30 | GATTT:0.8           |            | G:0.2          |
| chr28                | 9634589 | 2 | 32 | C:0.46875           |            | CT:0.53125     |
| chr28                | 9634607 | 2 | 38 | T:0.789474          |            | G:0.210526     |
| chr28                | 9634619 | 2 | 40 | TTTTG:0.8           |            | T:0.2          |
| chr28                | 9634690 | 2 | 36 | G:0.527778          |            | A:0.472222     |
| chr28                | 9634767 | 2 | 34 | G:0.882353          |            | A:0.117647     |
| chr28                | 9635248 | 2 | 40 | G:1                 | T:0        |                |
| chr28                | 9635437 | 2 | 36 | G:1                 | A:0        |                |
| chr28                | 9635479 | 2 | 34 | G:1                 | T:0        |                |
| chr28                | 9635722 | 2 | 34 | C:0.882353          |            | T:0.117647     |
| chr28                | 9637485 | 2 | 38 | G:0.184211          |            | A:0.815789     |
| chr28                | 9637689 | 2 | 36 | G:0.25              | A:0.75     |                |
| chr28                | 9638048 | 2 | 38 | A:0                 | AT:1       |                |
| chr28                | 9638178 | 3 | 40 | TAA:0.575           |            | T:0.1 TA:0.325 |
| chr28                | 9638628 | 2 | 34 | C:0.588235          |            | T:0.411765     |
| chr28                | 9638765 | 2 | 38 | G:0.815789          |            | A:0.184211     |
| chr28                | 9638891 | 2 | 36 | AT:0.75             | A:0.25     |                |
| chr28                | 9638897 | 2 | 36 | T:0.75              | A:0.25     |                |
| chr28                | 9638903 | 2 | 34 | TTTTTA:0.911765     |            | T:0.0882353    |
| chr28                | 9638904 | 2 | 34 | TTTTA:0.882353      |            | T:0.117647     |
| chr28                | 9639007 | 2 | 38 | T:0.684211          |            | C:0.315789     |
| chr28                | 9639582 | 2 | 36 | G:1                 | A:0        |                |
| chr28                | 9640520 | 2 | 36 | T:0.944444          |            | C:0.0555556    |
| chr28                | 9640812 | 2 | 34 | C:0.205882          |            | T:0.794118     |
| chr28                | 9640917 | 2 | 34 | A:1                 | T:0        |                |
| chr28                | 9641210 | 2 | 36 | C:0.638889          |            | T:0.361111     |
| chr28                | 9641320 | 3 | 30 | TAAAAAAA:0.733333   |            | T:             |
| 0.133333 TA:0.133333 |         |   |    |                     |            |                |
| chr28                | 9641432 | 2 | 32 | GAT:0.84375         |            | G:0.15625      |

chr28 9641446 4 40 T:0.85  
TATATATATATGATGTCATATATATATGATGTCATC:0.1  
TATATATATATATGATGTCATATATATATGATGTCATC:0.05  
TATATATATATATATGATGTCATATATATATGATGTCATC:0  
chr28 9641936 2 40 A:0.675 G:0.325  
chr28 9642104 2 38 C:0.684211 G:0.315789  
chr28 9642174 2 32 G:0.84375 T:0.15625  
chr28 9643130 2 38 GA:0.684211 G:0.315789  
chr28 9646093 2 40 A:0.275 G:0.725  
chr28 9646782 2 32 C:0.78125 CT:0.21875  
chr28 9647574 2 36 T:0.777778 TA:0.222222  
chr28 9647680 3 40 A:0.375 AGTGTGTGT:0.3  
AGTGTGTGTGT:0.325  
chr28 9647845 2 40 T:0.125 C:0.875  
chr28 9648320 2 36 G:1 A:0  
chr28 9648412 2 38 C:0.842105 T:0.157895  
chr28 9648490 2 40 C:1 T:0  
chr28 9648986 2 38 A:1 G:0  
chr28 9649214 2 40 A:0.45 G:0.55  
chr28 9649446 2 38 A:0.552632 C:0.447368  
chr28 9649505 2 40 A:0.55 G:0.45  
chr28 9650323 3 30 G:0.3 GTT:0.266667 GTTT:  
0.433333  
chr28 9650634 2 36 C:0.555556 A:0.444444  
chr28 9650639 2 36 T:1 C:0  
chr28 9651038 2 38 T:0.5 C:0.5  
chr28 9651083 2 38 CTT:0.578947 C:0.421053  
chr28 9651369 2 34 A:0.882353 G:0.117647  
chr28 9651668 2 40 T:0.625 C:0.375  
chr28 9651680 2 40 G:0.475 A:0.525  
chr28 9652019 2 38 TGTC A:0.421053 T:0.578947  
chr28 9652056 2 38 G:0.684211 C:0.315789  
chr28 9652957 2 36 T:0.527778 C:0.472222  
chr28 9653028 2 36 T:0.444444 C:0.555556  
chr28 9653703 2 38 T:0.657895 C:0.342105  
chr28 9653750 2 36 A:0.861111 G:0.138889  
chr28 9653818 2 38 T:0.526316 TTAA:0.473684  
chr28 9654143 2 32 A:0.65625 G:0.34375  
chr28 9654174 2 30 C:0.733333 T:0.266667  
chr28 9654445 2 20 G:0.65 GC:0.35  
chr28 9654971 2 36 A:0.666667 G:0.333333  
chr28 9655006 2 38 C:0.473684 T:0.526316  
chr28 9655026 2 40 T:0.35 C:0.65  
chr28 9655278 2 38 T:0.894737  
TGAGTTACCCCTCACTG:0.105263  
chr28 9655280 2 38 A:0.631579  
AGTTACCCCTCACTGGG:0.368421  
chr28 9655689 2 38 C:0.684211 T:0.315789  
chr28 9655751 2 30 C:0.9 T:0.1  
chr28 9655846 2 36 G:0.611111 A:0.388889  
chr28 9656111 2 40 A:0.95 G:0.05  
chr28 9656180 2 34 T:0.441176 G:0.558824  
chr28 9656183 2 34 C:0.794118 CA:0.205882  
chr28 9656400 2 38 G:0.842105 A:0.157895



|                            |         |   |    |                   |              |
|----------------------------|---------|---|----|-------------------|--------------|
| chr28                      | 9656541 | 2 | 38 | A:0.421053        | C:0.578947   |
| chr28                      | 9656548 | 2 | 38 | G:0.815789        | A:0.184211   |
| chr28                      | 9656876 | 2 | 34 | A:0.852941        | T:0.147059   |
| chr28                      | 9657139 | 2 | 22 | T:0.318182        | C:0.681818   |
| chr28                      | 9657309 | 2 | 40 | GT:0.55 G:0.45    |              |
| chr28                      | 9657397 | 2 | 36 | G:0.861111        | A:0.138889   |
| chr28                      | 9657624 | 2 | 34 | T:0.323529        | A:0.676471   |
| chr28                      | 9657795 | 2 | 24 | C:0.666667        | A:0.333333   |
| chr28                      | 9657904 | 2 | 26 | G:0.884615        | A:0.115385   |
| chr28                      | 9657940 | 2 | 34 | A:0.588235        | AGCATGCAGT:  |
| 0.411765                   |         |   |    |                   |              |
| chr28                      | 9658171 | 2 | 34 | TC:0.852941       | T:0.147059   |
| chr28                      | 9658397 | 2 | 40 | T:0.45 C:0.55     |              |
| chr28                      | 9658782 | 2 | 38 | C:0.710526        | T:0.289474   |
| chr28                      | 9658807 | 2 | 38 | A:0.552632        | T:0.447368   |
| chr28                      | 9659055 | 2 | 36 | A:0.444444        | AGC:0.555556 |
| chr28                      | 9659105 | 2 | 38 | T:0.552632        |              |
| TGCTTCCGCTGTGTCAG:0.447368 |         |   |    |                   |              |
| chr28                      | 9659176 | 2 | 38 | G:0.421053        | GA:0.578947  |
| chr28                      | 9659199 | 2 | 38 | A:0.605263        | G:0.394737   |
| chr28                      | 9659205 | 2 | 38 | G:0.605263        | A:0.394737   |
| chr28                      | 9659489 | 2 | 40 | CAA:0.85 C:0.15   |              |
| chr28                      | 9659589 | 2 | 36 | C:0.583333        | T:0.416667   |
| chr28                      | 9659647 | 2 | 36 | T:0.333333        | C:0.666667   |
| chr28                      | 9659741 | 2 | 38 | G:0.578947        | A:0.421053   |
| chr28                      | 9659752 | 2 | 38 | T:0.736842        | A:0.263158   |
| chr28                      | 9659891 | 2 | 32 | G:0.5 GC:0.5      |              |
| chr28                      | 9660193 | 2 | 40 | G:0.825 T:0.175   |              |
| chr28                      | 9660414 | 2 | 40 | C:0.7 T:0.3       |              |
| chr28                      | 9660529 | 2 | 36 | C:0.833333        | T:0.166667   |
| chr28                      | 9660628 | 2 | 40 | T:0.575 G:0.425   |              |
| chr28                      | 9660887 | 2 | 36 | T:0.166667        | C:0.833333   |
| chr28                      | 9661344 | 2 | 36 | G:0.916667        | T:0.0833333  |
| chr28                      | 9661812 | 2 | 34 | C:0.264706        | G:0.735294   |
| chr28                      | 9661982 | 2 | 32 | TAA:0.84375       | T:0.15625    |
| chr28                      | 9661983 | 2 | 32 | A:0.9375 T:0.0625 |              |
| chr28                      | 9662011 | 2 | 34 | C:0.617647        | CAG:0.382353 |
| chr28                      | 9662101 | 2 | 32 | A:0.1875 T:0.8125 |              |
| chr28                      | 9662113 | 2 | 32 | C:0.84375         | T:0.15625    |
| chr28                      | 9662146 | 2 | 36 | T:0.305556        | C:0.694444   |
| chr28                      | 9662157 | 2 | 36 | G:0.583333        | A:0.416667   |
| chr28                      | 9662260 | 2 | 38 | C:0.657895        | T:0.342105   |
| chr28                      | 9662584 | 2 | 36 | A:0.75 T:0.25     |              |
| chr28                      | 9662786 | 2 | 36 | T:0.861111        | C:0.138889   |
| chr28                      | 9662830 | 2 | 36 | C:0.916667        | T:0.0833333  |
| chr28                      | 9663399 | 2 | 40 | C:0.8 T:0.2       |              |
| chr28                      | 9663510 | 2 | 38 | A:0.473684        | G:0.526316   |
| chr28                      | 9663899 | 2 | 38 | G:0.552632        | A:0.447368   |
| chr28                      | 9664071 | 2 | 36 | T:0.444444        | C:0.555556   |
| chr28                      | 9664231 | 2 | 40 | T:0.675 A:0.325   |              |
| chr28                      | 9664387 | 2 | 38 | G:0.473684        | A:0.526316   |
| chr28                      | 9664447 | 2 | 40 | G:0.65 A:0.35     |              |
| chr28                      | 9664638 | 2 | 40 | A:0.375 G:0.625   |              |
| chr28                      | 9665033 | 2 | 36 | T:0.805556        | C:0.194444   |

|       |         |   |    |             |              |        |
|-------|---------|---|----|-------------|--------------|--------|
| chr28 | 9665243 | 2 | 36 | G:0.694444  | A:0.305556   |        |
| chr28 | 9665256 | 2 | 36 | C:0.555556  | G:0.444444   |        |
| chr28 | 9665461 | 2 | 36 | G:0.666667  | A:0.333333   |        |
| chr28 | 9665513 | 2 | 34 | C:1         | T:0          |        |
| chr28 | 9666121 | 2 | 32 | A:0.375     | T:0.625      |        |
| chr28 | 9666214 | 2 | 40 | G:0.675     | A:0.325      |        |
| chr28 | 9666242 | 2 | 38 | A:0.447368  | G:0.552632   |        |
| chr28 | 9666302 | 2 | 40 | T:0.525     | G:0.475      |        |
| chr28 | 9666472 | 2 | 40 | G:0.825     | C:0.175      |        |
| chr28 | 9666500 | 2 | 36 | G:1         | A:0          |        |
| chr28 | 9666626 | 2 | 26 | C:0.576923  | CT:0.423077  |        |
| chr28 | 9666723 | 2 | 40 | C:0.9       | T:0.1        |        |
| chr28 | 9666783 | 2 | 38 | C:0.815789  | G:0.184211   |        |
| chr28 | 9666948 | 2 | 36 | G:0.5       | T:0.5        |        |
| chr28 | 9667079 | 2 | 38 | T:0.631579  | C:0.368421   |        |
| chr28 | 9667086 | 2 | 38 | C:0.894737  | CCG:0.105263 |        |
| chr28 | 9667231 | 2 | 38 | C:0.473684  | A:0.526316   |        |
| chr28 | 9667505 | 2 | 38 | C:0.657895  | T:0.342105   |        |
| chr28 | 9667701 | 2 | 34 | C:0.823529  | T:0.176471   |        |
| chr28 | 9667996 | 2 | 36 | A:0.555556  | G:0.444444   |        |
| chr28 | 9668104 | 2 | 34 | C:0.558824  | T:0.441176   |        |
| chr28 | 9668263 | 2 | 38 | A:0.815789  | G:0.184211   |        |
| chr28 | 9668410 | 2 | 36 | C:0         | CA:1         |        |
| chr28 | 9668421 | 2 | 36 | TG:0        | T:1          |        |
| chr28 | 9668423 | 2 | 36 | T:0         | A:1          |        |
| chr28 | 9668439 | 2 | 38 | C:0.921053  | T:0.0789474  |        |
| chr28 | 9668995 | 2 | 40 | G:0.6       | A:0.4        |        |
| chr28 | 9669489 | 2 | 36 | G:0.805556  | A:0.194444   |        |
| chr28 | 9669533 | 2 | 38 | T:0.815789  | C:0.184211   |        |
| chr28 | 9669608 | 2 | 40 | T:0.875     | C:0.125      |        |
| chr28 | 9669803 | 2 | 36 | T:0.0555556 | C:0.944444   |        |
| chr28 | 9669900 | 2 | 40 | T:0.625     | TCC:0.375    |        |
| chr28 | 9669906 | 3 | 40 | A:0.6       | AAAAAC:0.1   | AAAAC: |
|       | 0.3     |   |    |             |              |        |
| chr28 | 9670366 | 2 | 32 | A:0         | G:1          |        |
| chr28 | 9671318 | 2 | 36 | G:0.694444  | A:0.305556   |        |
| chr28 | 9671397 | 2 | 38 | C:0.315789  | T:0.684211   |        |
| chr28 | 9671732 | 2 | 38 | A:0.842105  | G:0.157895   |        |
| chr28 | 9671764 | 2 | 38 | C:0.736842  | T:0.263158   |        |
| chr28 | 9671862 | 2 | 38 | T:0.421053  | C:0.578947   |        |
| chr28 | 9671913 | 2 | 38 | A:0.921053  | G:0.0789474  |        |
| chr28 | 9671943 | 2 | 40 | A:0.45      | ACTGT:0.55   |        |
| chr28 | 9672157 | 2 | 38 | C:0.631579  | CT:0.368421  |        |
| chr28 | 9672165 | 2 | 38 | T:0.921053  | A:0.0789474  |        |
| chr28 | 9672255 | 2 | 38 | T:0.210526  | G:0.789474   |        |
| chr28 | 9672418 | 2 | 38 | A:0.605263  | G:0.394737   |        |
| chr28 | 9672819 | 2 | 36 | C:1         | CT:0         |        |
| chr28 | 9672838 | 2 | 38 | C:0.526316  | T:0.473684   |        |
| chr28 | 9672902 | 2 | 36 | A:0.472222  | G:0.527778   |        |
| chr28 | 9672992 | 2 | 28 | T:1         | C:0          |        |
| chr28 | 9673011 | 2 | 28 | A:1         | C:0          |        |
| chr28 | 9673012 | 2 | 28 | T:1         | C:0          |        |
| chr28 | 9673119 | 2 | 16 | C:1         | T:0          |        |
| chr28 | 9673653 | 2 | 30 | CA:0.8      | C:0.2        |        |

|         |             |   |    |               |         |                 |
|---------|-------------|---|----|---------------|---------|-----------------|
| chr28   | 9673654     | 2 | 30 | A:0.9         | C:0.1   |                 |
| chr28   | 9673757     | 2 | 36 | C:0.777778    |         | T:0.222222      |
| chr28   | 9674395     | 2 | 22 | C:0.454545    |         | T:0.545455      |
| chr28   | 9674746     | 2 | 40 | G:1           | T:0     |                 |
| chr28   | 9674957     | 2 | 30 | T:0.833333    |         | TA:0.166667     |
| chr28   | 9675054     | 2 | 40 | G:0.55        | GA:0.45 |                 |
| chr28   | 9675246     | 2 | 38 | C:0.815789    |         | CT:0.184211     |
| chr28   | 9675392     | 2 | 38 | G:0.973684    |         | A:0.0263158     |
| chr28   | 9675737     | 2 | 34 | C:0.117647    |         | T:0.882353      |
| chr28   | 9676395     | 2 | 38 | C:0.842105    |         | T:0.157895      |
| chr28   | 9676547     | 2 | 34 | C:0.823529    |         | T:0.176471      |
| chr28   | 9676732     | 2 | 38 | G:0.894737    |         | A:0.105263      |
| chr28   | 9676832     | 2 | 36 | T:0.861111    |         | C:0.138889      |
| chr28   | 9677014     | 2 | 36 | A:0.833333    |         | G:0.166667      |
| chr28   | 9677144     | 2 | 36 | A:0.861111    |         | T:0.138889      |
| chr28   | 9677639     | 2 | 38 | A:0.894737    |         | ATTG:0.105263   |
| chr28   | 9677825     | 2 | 38 | G:0.0789474   |         | A:0.921053      |
| chr28   | 9677987     | 2 | 38 | G:1           | C:0     |                 |
| chr28   | 9678142     | 2 | 38 | A:0.157895    |         | C:0.842105      |
| chr28   | 9678350     | 2 | 40 | C:0.075       | A:0.925 |                 |
| chr28   | 9678399     | 2 | 36 | G:0.166667    |         | A:0.833333      |
| chr28   | 9678745     | 2 | 38 | G:0.815789    |         | T:0.184211      |
| chr28   | 9679435     | 2 | 38 | A:0.763158    |         | G:0.236842      |
| chr28   | 9679624     | 2 | 34 | A:1           | C:0     |                 |
| chr28   | 9679710     | 2 | 36 | A:0.805556    |         | G:0.194444      |
| chr28   | 9680298     | 2 | 36 | C:0.833333    |         | T:0.166667      |
| chr28   | 9680322     | 2 | 36 | T:0.833333    |         | C:0.166667      |
| chr28   | 9680453     | 2 | 40 | C:0.35        | T:0.65  |                 |
| chr28   | 9680576     | 2 | 40 | C:0.7         | T:0.3   |                 |
| chr28   | 9680940     | 2 | 34 | A:0.117647    |         | G:0.882353      |
| chr28   | 9681149     | 2 | 38 | G:0.842105    |         | A:0.157895      |
| chr28   | 9681230     | 2 | 38 | T:0.105263    |         | C:0.894737      |
| chr28   | 9681350     | 2 | 34 | C:0.852941    |         | T:0.147059      |
| chr28   | 9681525     | 2 | 38 | C:0.736842    |         | T:0.263158      |
| chr28   | 9681616     | 2 | 36 | G:0.166667    |         | A:0.833333      |
| chr28   | 9682796     | 2 | 40 | A:0.925       | T:0.075 |                 |
| chr28   | 9684073     | 2 | 26 | A:0.846154    |         | G:0.153846      |
| chr28   | 9684650     | 2 | 36 | G:0.222222    |         | GTA:0.777778    |
| chr28   | 9684944     | 2 | 34 | T:0.411765    |         | C:0.588235      |
| chr28   | 9685059     | 2 | 32 | C:0.71875     |         | CCTCTCT:0.28125 |
| chr28   | 9685108     | 4 | 32 | TAA:0.28125   |         | T:0.4375 TA:    |
| 0.21875 | TAAA:0.0625 |   |    |               |         |                 |
| chr28   | 9686194     | 2 | 34 | G:0.882353    |         | A:0.117647      |
| chr28   | 9687510     | 2 | 36 | G:1           | A:0     |                 |
| chr28   | 9687764     | 2 | 38 | A:0.368421    |         | C:0.631579      |
| chr28   | 9688323     | 2 | 36 | C:0.416667    |         | G:0.583333      |
| chr28   | 9688775     | 2 | 34 | A:0.852941    |         | G:0.147059      |
| chr28   | 9690095     | 2 | 38 | A:0.842105    |         | AAAT:0.157895   |
| chr28   | 9690750     | 2 | 36 | C:0.888889    |         | CAG:0.111111    |
| chr28   | 9691046     | 2 | 38 | T:0.868421    |         | TAA:0.131579    |
| chr28   | 9691065     | 2 | 36 | AAAT:0.833333 |         | A:0.166667      |
| chr28   | 9691066     | 2 | 34 | AAT:0.647059  |         | A:0.352941      |
| chr28   | 9691068     | 3 | 38 | TAA:1         | T:0     | TA:0            |
| chr28   | 9691517     | 2 | 34 | T:0.882353    |         | A:0.117647      |

|       |         |   |    |                            |                                                         |
|-------|---------|---|----|----------------------------|---------------------------------------------------------|
| chr28 | 9692141 | 2 | 36 | A:0.861111                 | T:0.138889                                              |
| chr28 | 9692875 | 2 | 34 | C:0.617647                 | T:0.382353                                              |
| chr28 | 9693030 | 2 | 36 | C:0.833333                 | CG:0.166667                                             |
| chr28 | 9693291 | 2 | 32 | G:0.1875                   | A:0.8125                                                |
| chr28 | 9693366 | 2 | 34 | A:0.147059                 | G:0.852941                                              |
| chr28 | 9694301 | 3 | 34 | ACT:0.852941               | A:0 ACTCT:<br>0.147059                                  |
| chr28 | 9694803 | 2 | 36 | A:0.888889                 | C:0.111111                                              |
| chr28 | 9695387 | 2 | 8  | TGGGGG:0.5                 | T:0.5                                                   |
| chr28 | 9696099 | 2 | 38 | G:0.184211                 | T:0.815789                                              |
| chr28 | 9696868 | 2 | 38 | T:0.684211                 | C:0.315789                                              |
| chr28 | 9696922 | 2 | 38 | C:0.684211                 | T:0.315789                                              |
| chr28 | 9697041 | 3 | 34 | A:0.176471                 | ATTTCTTTC:<br>0.558824 ATTTCTTTCTTTC:0.264706           |
| chr28 | 9697490 | 2 | 38 | G:1 A:0                    |                                                         |
| chr28 | 9697717 | 2 | 34 | A:0.852941                 | T:0.147059                                              |
| chr28 | 9697967 | 2 | 28 | A:0.357143                 | AT:0.642857                                             |
| chr28 | 9698894 | 2 | 38 | CTTTTTTTTTTTT:0.736842     | C:<br>0.263158                                          |
| chr28 | 9699500 | 3 | 32 | G:0.46875                  | GTT:0.40625<br>GTTT:0.125                               |
| chr28 | 9701740 | 2 | 38 | G:0.842105                 | T:0.157895                                              |
| chr28 | 9703418 | 2 | 38 | C:0.578947                 | T:0.421053                                              |
| chr28 | 9703677 | 2 | 34 | T:1 A:0                    |                                                         |
| chr28 | 9704056 | 2 | 38 | T:0.973684                 | C:0.0263158                                             |
| chr28 | 9704171 | 2 | 36 | G:0.833333                 | A:0.166667                                              |
| chr28 | 9704381 | 2 | 36 | C:0.694444                 | T:0.305556                                              |
| chr28 | 9704426 | 2 | 38 | T:0.105263                 | C:0.894737                                              |
| chr28 | 9704625 | 2 | 36 | C:0.638889                 | T:0.361111                                              |
| chr28 | 9704945 | 2 | 36 | G:0.166667                 | A:0.833333                                              |
| chr28 | 9706082 | 2 | 40 | T:0.475 C:0.525            |                                                         |
| chr28 | 9706194 | 2 | 34 | G:0.0882353                | T:0.911765                                              |
| chr28 | 9706698 | 2 | 40 | C:0.15 T:0.85              |                                                         |
| chr28 | 9707018 | 2 | 38 | C:0.868421                 | CAG:0.131579                                            |
| chr28 | 9707475 | 2 | 38 | T:0.842105                 | C:0.157895                                              |
| chr28 | 9708142 | 2 | 38 | G:0.868421                 | A:0.131579                                              |
| chr28 | 9708223 | 4 | 40 | TAATAAAATAAAATAA:0.35      | T:0.375<br>TAATAAAATAA:0.05 TAATAAAATAAAATAAAATAA:0.225 |
| chr28 | 9710033 | 2 | 36 | A:0 G:1                    |                                                         |
| chr28 | 9710282 | 3 | 40 | CATAGAT:0.6                | C:0.35<br>CATAGATATAGAT:0.05                            |
| chr28 | 9710299 | 2 | 40 | A:1 ATC:0                  |                                                         |
| chr28 | 9710301 | 2 | 40 | A:1 AGATCTAGATC:0          |                                                         |
| chr28 | 9710322 | 2 | 40 | G:1 GATATAGAT:0            |                                                         |
| chr28 | 9710326 | 2 | 40 | G:1 T:0                    |                                                         |
| chr28 | 9710328 | 3 | 40 | T:1 G:0 TATAG:0            |                                                         |
| chr28 | 9711031 | 2 | 36 | AGTGT:0.833333             | A:0.166667                                              |
| chr28 | 9711258 | 2 | 34 | G:0.676471                 | A:0.323529                                              |
| chr28 | 9712579 | 2 | 36 | T:1 TA:0                   |                                                         |
| chr28 | 9713224 | 2 | 38 | C:1 G:0                    |                                                         |
| chr28 | 9713970 | 2 | 36 | A:0.833333                 | G:0.166667                                              |
| chr28 | 9714649 | 2 | 38 | CAATTTAATTACTTCAATTAATAA:0 |                                                         |
| C:1   |         |   |    |                            |                                                         |
| chr28 | 9714674 | 2 | 38 | A:0 AGG:1                  |                                                         |

|                     |         |   |    |              |         |             |
|---------------------|---------|---|----|--------------|---------|-------------|
| chr28               | 9715061 | 2 | 34 | T:1          | TA:0    |             |
| chr28               | 9715135 | 2 | 38 | T:0.973684   |         | A:0.0263158 |
| chr28               | 9715311 | 2 | 36 | C:1          | T:0     |             |
| chr28               | 9715329 | 3 | 36 | TA:0.694444  |         | T:0.111111  |
| TAA:0.194444        |         |   |    |              |         |             |
| chr28               | 9715348 | 2 | 36 | T:0.138889   |         | C:0.861111  |
| chr28               | 9715604 | 2 | 40 | G:0.15       | T:0.85  |             |
| chr28               | 9716009 | 2 | 40 | G:0.85       | A:0.15  |             |
| chr28               | 9716417 | 2 | 38 | CT:0.736842  |         | C:0.263158  |
| chr28               | 9717522 | 2 | 40 | G:0.675      | A:0.325 |             |
| chr28               | 9717530 | 5 | 40 | ATGTG:0      | A:0.15  | ATG:0       |
| ATGTGTGTGTG:0.275   |         |   |    |              |         |             |
| ATGTGTGTGTGTG:0.575 |         |   |    |              |         |             |
| chr28               | 9717732 | 2 | 38 | C:1          | T:0     |             |
| chr28               | 9717766 | 2 | 38 | ACT:0.105263 |         | A:0.894737  |
| chr28               | 9718146 | 2 | 34 | T:0.852941   |         | C:0.147059  |
| chr28               | 9718514 | 2 | 38 | A:0.184211   |         | G:0.815789  |
| chr28               | 9718616 | 2 | 32 | TA:0.875     | T:0.125 |             |
| chr28               | 9718710 | 2 | 36 | A:0.111111   |         | C:0.888889  |
| chr28               | 9719127 | 2 | 34 | G:0.852941   |         | T:0.147059  |
| chr28               | 9719292 | 2 | 36 | C:0.111111   |         | T:0.888889  |
| chr28               | 9719408 | 2 | 34 | G:0.705882   |         | A:0.294118  |
| chr28               | 9719755 | 2 | 34 | A:0.911765   |         | C:0.0882353 |
| chr28               | 9720134 | 2 | 40 | C:0.725      | T:0.275 |             |
| chr28               | 9721639 | 2 | 36 | T:0.194444   |         | C:0.805556  |
| chr28               | 9721686 | 2 | 40 | C:1          | T:0     |             |
| chr28               | 9721729 | 2 | 38 | C:0.789474   |         | T:0.210526  |
| chr28               | 9722300 | 2 | 38 | C:0.131579   |         | T:0.868421  |
| chr28               | 9722335 | 2 | 36 | C:0.861111   |         | T:0.138889  |
| chr28               | 9722472 | 2 | 40 | G:0.975      | A:0.025 |             |
| chr28               | 9722667 | 2 | 34 | A:0.794118   |         | C:0.205882  |
| chr28               | 9722668 | 2 | 34 | GT:0.794118  |         | G:0.205882  |
| chr28               | 9722959 | 2 | 38 | C:1          | T:0     |             |
| chr28               | 9723206 | 2 | 34 | A:1          | G:0     |             |
| chr28               | 9723630 | 2 | 32 | G:0.125      | A:0.875 |             |
| chr28               | 9723919 | 2 | 36 | C:0.861111   |         | G:0.138889  |
| chr28               | 9723997 | 2 | 36 | G:0.861111   |         | A:0.138889  |
| chr28               | 9724006 | 2 | 40 | A:1          | G:0     |             |
| chr28               | 9724574 | 2 | 36 | G:1          | C:0     |             |
| chr28               | 9724633 | 2 | 36 | T:1          | C:0     |             |
| chr28               | 9724744 | 2 | 38 | C:1          | T:0     |             |
| chr28               | 9724827 | 2 | 36 | A:1          | G:0     |             |
| chr28               | 9724894 | 2 | 36 | T:1          | C:0     |             |
| chr28               | 9724895 | 2 | 36 | T:1          | C:0     |             |
| chr28               | 9725235 | 2 | 40 | A:1          | AC:0    |             |
| chr28               | 9725236 | 2 | 40 | A:1          | T:0     |             |
| chr28               | 9725255 | 2 | 40 | T:1          | C:0     |             |
| chr28               | 9725275 | 2 | 40 | T:1          | C:0     |             |
| chr28               | 9725447 | 2 | 38 | T:1          | G:0     |             |
| chr28               | 9725570 | 2 | 36 | G:0.722222   |         | A:0.277778  |
| chr28               | 9725663 | 2 | 34 | G:1          | A:0     |             |
| chr28               | 9725823 | 2 | 36 | T:1          | C:0     |             |
| chr28               | 9725868 | 2 | 36 | TG:0.861111  |         | T:0.138889  |
| chr28               | 9725883 | 2 | 34 | A:1          | C:0     |             |
| chr28               | 9725982 | 2 | 38 | T:1          | C:0     |             |

|                            |                 |   |    |                |                     |
|----------------------------|-----------------|---|----|----------------|---------------------|
| chr28                      | 9726140         | 2 | 38 | CT:1           | C:0                 |
| chr28                      | 9726488         | 2 | 38 | T:0.631579     | C:0.368421          |
| chr28                      | 9726505         | 2 | 40 | TA:0.15        | T:0.85              |
| chr28                      | 9727078         | 2 | 40 | T:0.125        | C:0.875             |
| chr28                      | 9727823         | 2 | 40 | C:1            | T:0                 |
| chr28                      | 9727831         | 2 | 40 | AAAACGT:0.475  | A:0.525             |
| chr28                      | 9728288         | 2 | 36 | T:0.805556     | C:0.194444          |
| chr28                      | 9728361         | 2 | 38 | A:1            | T:0                 |
| chr28                      | 9728491         | 2 | 36 | T:0.0833333    | G:0.916667          |
| chr28                      | 9729023         | 2 | 40 | G:0.875        | A:0.125             |
| chr28                      | 9729591         | 4 | 40 | TAATGAATG:0.4  | T:0.25              |
| 0.35                       | TAATGAATGAATG:0 |   |    |                |                     |
| chr28                      | 9730419         | 2 | 38 | T:0.868421     | A:0.131579          |
| chr28                      | 9730820         | 2 | 38 | T:0            | C:1                 |
| chr28                      | 9730882         | 2 | 38 | T:1            | C:0                 |
| chr28                      | 9731081         | 2 | 32 | C:0.875        | T:0.125             |
| chr28                      | 9731210         | 2 | 38 | A:1            | AT:0                |
| chr28                      | 9731212         | 2 | 38 | A:1            | T:0                 |
| chr28                      | 9731223         | 2 | 38 | GAT:0.157895   | G:0.842105          |
| chr28                      | 9731276         | 2 | 38 | C:0.894737     | T:0.105263          |
| chr28                      | 9731289         | 2 | 38 | T:0.894737     | G:0.105263          |
| chr28                      | 9731315         | 2 | 38 | CAAT:0.868421  | C:0.131579          |
| chr28                      | 9731461         | 2 | 36 | C:0.833333     | T:0.166667          |
| chr28                      | 9731643         | 2 | 38 | A:0.842105     | G:0.157895          |
| chr28                      | 9731646         | 2 | 38 | G:0.657895     | A:0.342105          |
| chr28                      | 9732250         | 2 | 36 | C:0.916667     | G:0.0833333         |
| chr28                      | 9732289         | 2 | 36 | TCC:0.861111   | T:0.138889          |
| chr28                      | 9732713         | 2 | 34 | A:0.823529     | C:0.176471          |
| chr28                      | 9732824         | 2 | 40 | C:1            | CTATATATATAACTATA:0 |
| chr28                      | 9733050         | 2 | 38 | C:1            | T:0                 |
| chr28                      | 9733070         | 2 | 36 | A:0.861111     | G:0.138889          |
| chr28                      | 9733084         | 2 | 36 | C:1            | T:0                 |
| chr28                      | 9733147         | 2 | 38 | T:1            | A:0                 |
| chr28                      | 9733150         | 2 | 38 | C:1            | T:0                 |
| chr28                      | 9733564         | 2 | 36 | G:0.833333     | A:0.166667          |
| chr28                      | 9733818         | 2 | 36 | CAGAA:0.861111 | C:0.138889          |
| chr28                      | 9733823         | 2 | 36 | A:0.861111     | C:0.138889          |
| chr28                      | 9733861         | 2 | 38 | A:1            | G:0                 |
| chr28                      | 9734028         | 2 | 32 | T:0.90625      | C:0.09375           |
| chr28                      | 9734239         | 2 | 38 | T:0.447368     | C:0.552632          |
| chr28                      | 9734628         | 3 | 36 | G:0.0555556    | GTC:0.25            |
| 0.694444                   |                 |   |    |                |                     |
| chr28                      | 9734706         | 2 | 40 | A:0.85         | T:0.15              |
| chr28                      | 9734721         | 3 | 36 | CAA:0.722222   | C:0.166667          |
| CAAA:0.111111              |                 |   |    |                |                     |
| chr28                      | 9734868         | 2 | 36 | G:0.861111     | C:0.138889          |
| chr28                      | 9736579         | 2 | 34 | A:0.588235     | G:0.411765          |
| chr28                      | 9736608         | 2 | 36 | A:1            | T:0                 |
| chr28                      | 9736672         | 2 | 34 | T:0.558824     | TAAG:0.441176       |
| chr28                      | 9736841         | 2 | 36 | A:0.472222     | G:0.527778          |
| chr28                      | 9737006         | 4 | 36 | A:0.194444     | ATG:0.444444        |
| ATGTGTGTGTGTGTGTG:0.361111 |                 |   |    |                |                     |
| chr28                      | 9737028         | 2 | 30 | A:0.566667     | ATT:0.433333        |
| chr28                      | 9737409         | 2 | 38 | T:0.368421     | C:0.631579          |

|       |               |   |    |                 |              |
|-------|---------------|---|----|-----------------|--------------|
| chr28 | 9737548       | 3 | 40 | GT:0.125 G:0.6  | GTT:0.275    |
| chr28 | 9737645       | 2 | 38 | A:0.421053      | C:0.578947   |
| chr28 | 9737667       | 2 | 36 | C:0.611111      | T:0.388889   |
| chr28 | 9737805       | 2 | 36 | A:0.416667      | G:0.583333   |
| chr28 | 9737930       | 2 | 38 | T:0.894737      | C:0.105263   |
| chr28 | 9738289       | 2 | 34 | CA:0.676471     | C:0.323529   |
| chr28 | 9738986       | 2 | 34 | T:0.705882      | C:0.294118   |
| chr28 | 9739027       | 2 | 32 | G:0.90625       | A:0.09375    |
| chr28 | 9739349       | 2 | 38 | G:0.894737      | A:0.105263   |
| chr28 | 9739370       | 2 | 38 | T:0.894737      | C:0.105263   |
| chr28 | 9739420       | 2 | 40 | C:0.85 T:0.15   |              |
| chr28 | 9739441       | 2 | 40 | T:0.85 C:0.15   |              |
| chr28 | 9739464       | 2 | 40 | T:0.85 C:0.15   |              |
| chr28 | 9739475       | 2 | 40 | G:0.85 A:0.15   |              |
| chr28 | 9739585       | 2 | 38 | C:0.842105      | T:0.157895   |
| chr28 | 9739593       | 2 | 38 | G:0.657895      | A:0.342105   |
| chr28 | 9739661       | 2 | 38 | C:0.578947      | T:0.421053   |
| chr28 | 9739683       | 2 | 38 | G:0.973684      | T:0.0263158  |
| chr28 | 9739715       | 3 | 32 | A:0.71875       | C:0 T:       |
|       | 0.28125       |   |    |                 |              |
| chr28 | 9739815       | 2 | 40 | G:0.925 A:0.075 |              |
| chr28 | 9739860       | 2 | 38 | C:0.894737      | T:0.105263   |
| chr28 | 9739865       | 2 | 38 | C:0.894737      | G:0.105263   |
| chr28 | 9739866       | 2 | 38 | A:1 G:0         |              |
| chr28 | 9739947       | 2 | 36 | G:0.972222      | C:0.0277778  |
| chr28 | 9740055       | 2 | 36 | G:0.361111      | A:0.638889   |
| chr28 | 9740120       | 2 | 38 | C:0.894737      | T:0.105263   |
| chr28 | 9740234       | 2 | 36 | G:0.444444      | A:0.555556   |
| chr28 | 9740295       | 2 | 36 | C:0.666667      | T:0.333333   |
| chr28 | 9740534       | 2 | 40 | G:0.6 A:0.4     |              |
| chr28 | 9740867       | 2 | 32 | G:0.40625       | A:0.59375    |
| chr28 | 9740886       | 2 | 36 | C:0.861111      | T:0.138889   |
| chr28 | 9740999       | 2 | 40 | CT:0.7 C:0.3    |              |
| chr28 | 9741008       | 4 | 38 | GT:0.315789     | G:0.578947   |
| GTT:0 | GTTT:0.105263 |   |    |                 |              |
| chr28 | 9741185       | 2 | 40 | TCTC:0.825      | T:0.175      |
| chr28 | 9741427       | 2 | 40 | TTC:0.875       | T:0.125      |
| chr28 | 9741441       | 2 | 40 | T:0.875 C:0.125 |              |
| chr28 | 9741450       | 2 | 40 | T:0.875 C:0.125 |              |
| chr28 | 9741626       | 2 | 34 | A:0.911765      | C:0.0882353  |
| chr28 | 9741663       | 2 | 34 | G:0.911765      | A:0.0882353  |
| chr28 | 9741924       | 2 | 38 | G:0.921053      | A:0.0789474  |
| chr28 | 9741942       | 2 | 38 | AATTG:0.921053  | A:0.0789474  |
| chr28 | 9742027       | 2 | 30 | T:0 C:1         |              |
| chr28 | 9742045       | 2 | 34 | C:0.911765      | T:0.0882353  |
| chr28 | 9742095       | 2 | 36 | A:0.972222      | AT:0.0277778 |
| chr28 | 9742175       | 2 | 40 | G:0 A:1         |              |
| chr28 | 9742286       | 2 | 36 | C:0.916667      | T:0.0833333  |
| chr28 | 9742324       | 2 | 36 | C:0.888889      | T:0.111111   |
| chr28 | 9742332       | 2 | 38 | A:0.710526      | G:0.289474   |
| chr28 | 9742394       | 2 | 36 | G:0.888889      | A:0.111111   |
| chr28 | 9742571       | 2 | 38 | G:1 A:0         |              |
| chr28 | 9742760       | 2 | 38 | T:0.578947      | G:0.421053   |
| chr28 | 9742857       | 2 | 38 | G:0.842105      | C:0.157895   |

|                      |                 |   |    |                |               |
|----------------------|-----------------|---|----|----------------|---------------|
| chr28                | 9743064         | 2 | 40 | T:0.875        | A:0.125       |
| chr28                | 9743116         | 2 | 40 | T:0.9          | TA:0.1        |
| chr28                | 9743160         | 2 | 36 | C:0.916667     | A:0.0833333   |
| chr28                | 9743176         | 2 | 36 | A:0.916667     | C:0.0833333   |
| chr28                | 9743185         | 2 | 36 | G:0.583333     | A:0.416667    |
| chr28                | 9743202         | 2 | 40 | A:0.875        | G:0.125       |
| chr28                | 9743328         | 2 | 38 | T:0.868421     | C:0.131579    |
| chr28                | 9743590         | 2 | 40 | G:0.925        | GGGAT:0.075   |
| chr28                | 9743591         | 4 | 40 | GGATAGATA:0.45 | G:0.15 GGATA: |
| 0.4                  | GGATAGATAGATA:0 |   |    |                |               |
| chr28                | 9743595         | 2 | 40 | A:1            | G:0           |
| chr28                | 9743634         | 3 | 40 | T:0.9          | TAGATAG:0.025 |
| TGATAGATAGATAG:0.075 |                 |   |    |                |               |
| chr28                | 9743837         | 2 | 34 | G:0.647059     | C:0.352941    |
| chr28                | 9743838         | 2 | 34 | T:0.588235     | C:0.411765    |
| chr28                | 9743960         | 2 | 36 | A:0.194444     | T:0.805556    |
| chr28                | 9744247         | 2 | 40 | C:0.9          | A:0.1         |
| chr28                | 9744622         | 2 | 38 | A:0.947368     | G:0.0526316   |
| chr28                | 9744849         | 2 | 40 | G:0.8          | A:0.2         |
| chr28                | 9745014         | 2 | 36 | G:0.888889     | T:0.111111    |
| chr28                | 9745028         | 2 | 38 | T:0.657895     | TA:0.342105   |
| chr28                | 9745205         | 2 | 34 | C:1            | T:0           |
| chr28                | 9745251         | 2 | 38 | T:0.842105     | C:0.157895    |
| chr28                | 9745261         | 2 | 38 | G:0.842105     | A:0.157895    |
| chr28                | 9745314         | 2 | 38 | G:0.736842     | A:0.263158    |
| chr28                | 9746163         | 2 | 38 | T:0.842105     | G:0.157895    |
| chr28                | 9746181         | 2 | 38 | C:0.868421     | T:0.131579    |
| chr28                | 9746220         | 2 | 38 | C:0.842105     | T:0.157895    |
| chr28                | 9746611         | 2 | 36 | TC:0.638889    | T:0.361111    |
| chr28                | 9746612         | 2 | 36 | C:0.888889     | T:0.111111    |
| chr28                | 9746758         | 2 | 36 | T:0.666667     | C:0.333333    |
| chr28                | 9747095         | 2 | 38 | T:0.578947     | TAC:0.421053  |
| chr28                | 9747240         | 2 | 40 | TC:0.95        | T:0.05        |
| chr28                | 9747525         | 2 | 38 | A:0.842105     | T:0.157895    |
| chr28                | 9747633         | 2 | 34 | C:0.735294     | T:0.264706    |
| chr28                | 9747866         | 2 | 36 | C:0.527778     | T:0.472222    |
| chr28                | 9747984         | 2 | 38 | A:0            | G:1           |
| chr28                | 9748265         | 2 | 38 | G:0.947368     | A:0.0526316   |
| chr28                | 9748530         | 2 | 38 | G:0.894737     | A:0.105263    |
| chr28                | 9749203         | 2 | 38 | A:0.842105     | G:0.157895    |
| chr28                | 9749315         | 2 | 30 | C:0.766667     | CT:0.233333   |
| chr28                | 9749494         | 2 | 38 | A:0.394737     | G:0.605263    |
| chr28                | 9749795         | 2 | 38 | A:0.368421     | G:0.631579    |
| chr28                | 9749831         | 2 | 40 | GC:0.575       | G:0.425       |
| chr28                | 9750270         | 2 | 36 | G:0.666667     | C:0.333333    |
| chr28                | 9750347         | 2 | 38 | A:0            | C:1           |
| chr28                | 9750948         | 2 | 34 | A:0.0294118    | G:0.970588    |
| chr28                | 9751061         | 2 | 32 | C:0.875        | G:0.125       |
| chr28                | 9751265         | 2 | 32 | C:0.59375      | T:0.40625     |
| chr28                | 9751372         | 2 | 36 | C:0.75         | T:0.25        |
| chr28                | 9751465         | 4 | 32 | AT:0.5625      | A:0.15625     |
| ATT:0.28125          | ATTTT:0         |   |    |                |               |
| chr28                | 9752140         | 3 | 38 | C:0.368421     | CTG:0.631579  |
| CTGTG:0              |                 |   |    |                |               |



|                                                |         |   |    |                              |                           |
|------------------------------------------------|---------|---|----|------------------------------|---------------------------|
| chr28                                          | 9752675 | 2 | 38 | G:0.842105                   | A:0.157895                |
| chr28                                          | 9752676 | 2 | 38 | A:0.842105                   | G:0.157895                |
| chr28                                          | 9753535 | 2 | 32 | C:0.875                      | A:0.125                   |
| chr28                                          | 9753816 | 2 | 36 | G:0.555556                   | A:0.444444                |
| chr28                                          | 9754192 | 2 | 34 | T:0.441176                   | C:0.558824                |
| chr28                                          | 9754329 | 2 | 40 | T:0.45                       | C:0.55                    |
| chr28                                          | 9754954 | 2 | 40 | T:0.9                        | TTTTTTA:0.1               |
| chr28                                          | 9754961 | 2 | 40 | A:0.9                        | ATTTATTTTTTTTTTAAATTT:0.1 |
| chr28                                          | 9755512 | 2 | 34 | G:1                          | A:0                       |
| chr28                                          | 9755568 | 2 | 40 | C:0.55                       | A:0.45                    |
| chr28                                          | 9755764 | 2 | 30 | G:0.4                        | T:0.6                     |
| chr28                                          | 9755816 | 2 | 38 | A:0.5                        | G:0.5                     |
| chr28                                          | 9755909 | 2 | 38 | CAAATAATAATAATAATAA:0.894737 |                           |
| C:0.105263                                     |         |   |    |                              |                           |
| chr28                                          | 9755910 | 6 | 38 | AAATAATAATAATAAT:0.473684    | A:                        |
| 0.0263158 AAAT:0 AAATAAT:0.0526316 AAATAATAAT: |         |   |    |                              |                           |
| 0.157895 AAATAATAATAAT:0.289474                |         |   |    |                              |                           |
| chr28                                          | 9756064 | 2 | 38 | A:0.5                        | G:0.5                     |
| chr28                                          | 9756106 | 2 | 36 | C:0.527778                   | G:0.472222                |
| chr28                                          | 9756139 | 2 | 38 | T:0.921053                   | TA:0.0789474              |
| chr28                                          | 9756756 | 2 | 32 | A:0.84375                    | G:0.15625                 |
| chr28                                          | 9756881 | 2 | 38 | A:0.605263                   | G:0.394737                |
| chr28                                          | 9757016 | 2 | 38 | C:0.394737                   | G:0.605263                |
| chr28                                          | 9757207 | 2 | 38 | T:0.842105                   | A:0.157895                |
| chr28                                          | 9757230 | 2 | 40 | C:1                          | T:0                       |
| chr28                                          | 9757270 | 2 | 40 | TCCTTCTCTCC:0.85             | T:0.15                    |
| chr28                                          | 9757282 | 2 | 40 | T:0.85                       | G:0.15                    |
| chr28                                          | 9757346 | 2 | 40 | TTCTCTCCATAAGTAATGATC:0.85   |                           |
| T:0.15                                         |         |   |    |                              |                           |
| chr28                                          | 9757454 | 2 | 36 | C:0.527778                   | T:0.472222                |
| chr28                                          | 9757710 | 2 | 38 | A:0.842105                   | G:0.157895                |
| chr28                                          | 9758156 | 2 | 36 | C:0.694444                   | CTTTTTTTT:                |
| 0.305556                                       |         |   |    |                              |                           |
| chr28                                          | 9758433 | 2 | 38 | TA:0.394737                  | T:0.605263                |
| chr28                                          | 9758746 | 2 | 36 | T:0.805556                   | A:0.194444                |
| chr28                                          | 9758811 | 2 | 34 | C:1                          | T:0                       |
| chr28                                          | 9759090 | 2 | 40 | GA:0.8                       | G:0.2                     |
| chr28                                          | 9759127 | 2 | 38 | G:0.631579                   | GAA:0.368421              |
| chr28                                          | 9759435 | 2 | 36 | G:0.75                       | C:0.25                    |
| chr28                                          | 9759494 | 2 | 30 | T:0.1                        | TAA:0.9                   |
| chr28                                          | 9759580 | 2 | 40 | C:0.6                        | A:0.4                     |
| chr28                                          | 9759649 | 2 | 36 | T:0.694444                   | C:0.305556                |
| chr28                                          | 9759874 | 2 | 32 | T:0.78125                    | C:0.21875                 |
| chr28                                          | 9759938 | 2 | 36 | A:0.305556                   | G:0.694444                |
| chr28                                          | 9759994 | 2 | 36 | G:0.777778                   | A:0.222222                |
| chr28                                          | 9760373 | 2 | 38 | T:0.710526                   | C:0.289474                |
| chr28                                          | 9760542 | 2 | 34 | G:0.647059                   | A:0.352941                |
| chr28                                          | 9760660 | 2 | 38 | C:0.789474                   | T:0.210526                |
| chr28                                          | 9761086 | 2 | 38 | GA:0.815789                  | G:0.184211                |
| chr28                                          | 9761098 | 2 | 38 | A:0.657895                   | C:0.342105                |
| chr28                                          | 9761245 | 2 | 36 | C:0.583333                   | CCT:0.416667              |
| chr28                                          | 9761552 | 2 | 40 | T:0.7                        | G:0.3                     |
| chr28                                          | 9761728 | 2 | 38 | G:0.842105                   | GT:0.157895               |
| chr28                                          | 9762479 | 2 | 38 | TG:0.763158                  | T:0.236842                |

|                                       |         |   |    |                           |                |
|---------------------------------------|---------|---|----|---------------------------|----------------|
| chr28                                 | 9762767 | 2 | 38 | AAG:0.947368              | A:0.0526316    |
| chr28                                 | 9763333 | 2 | 38 | A:0.921053                | T:0.0789474    |
| chr28                                 | 9763478 | 2 | 36 | C:0.25                    | T:0.75         |
| chr28                                 | 9763486 | 2 | 38 | T:0                       | C:1            |
| chr28                                 | 9764176 | 2 | 40 | C:0.325                   | G:0.675        |
| chr28                                 | 9764669 | 2 | 36 | G:0.361111                | C:0.638889     |
| chr28                                 | 9764759 | 2 | 38 | G:0.657895                |                |
| GAAATACAGATGTCAAAAAAAAAAAAAA:0.342105 |         |   |    |                           |                |
| chr28                                 | 9765181 | 2 | 40 | C:1                       | T:0            |
| chr28                                 | 9765523 | 2 | 36 | T:0                       | G:1            |
| chr28                                 | 9765634 | 2 | 40 | C:0.6                     | G:0.4          |
| chr28                                 | 9765903 | 2 | 36 | C:0.805556                | T:0.194444     |
| chr28                                 | 9766373 | 2 | 24 | T:0.541667                | C:0.458333     |
| chr28                                 | 9766593 | 2 | 34 | GAGAAAGAAAAGAAGAAAGAAAGA: |                |
| 0.382353 G:0.617647                   |         |   |    |                           |                |
| chr28                                 | 9766676 | 2 | 34 | AAG:0.411765              | A:0.588235     |
| chr28                                 | 9766683 | 2 | 34 | G:0.411765                | GA:0.588235    |
| chr28                                 | 9766993 | 2 | 36 | G:0.388889                | A:0.611111     |
| chr28                                 | 9767153 | 2 | 38 | C:0.842105                | T:0.157895     |
| chr28                                 | 9767192 | 2 | 36 | T:1                       | C:0            |
| chr28                                 | 9767386 | 2 | 38 | T:0.657895                | TTAGA:0.342105 |
| chr28                                 | 9767447 | 2 | 40 | T:0.35                    | C:0.65         |
| chr28                                 | 9767480 | 2 | 40 | G:0.625                   | C:0.375        |
| chr28                                 | 9767673 | 2 | 40 | G:0.675                   | A:0.325        |
| chr28                                 | 9768353 | 2 | 40 | A:0.35                    | G:0.65         |
| chr28                                 | 9768697 | 2 | 38 | C:0.789474                | T:0.210526     |
| chr28                                 | 9769049 | 2 | 40 | A:0.85                    | AT:0.15        |
| chr28                                 | 9769050 | 2 | 40 | T:0.875                   | TA:0.125       |
| chr28                                 | 9770759 | 2 | 36 | G:0.833333                | C:0.166667     |
| chr28                                 | 9771167 | 2 | 38 | C:0.710526                | T:0.289474     |
| chr28                                 | 9771342 | 2 | 34 | C:0.411765                | T:0.588235     |
| chr28                                 | 9771538 | 2 | 38 | T:0.815789                | TA:0.184211    |
| chr28                                 | 9771702 | 2 | 38 | C:0.921053                | T:0.0789474    |
| chr28                                 | 9771730 | 2 | 38 | A:0.421053                | G:0.578947     |
| chr28                                 | 9772152 | 2 | 36 | G:0.722222                | T:0.277778     |
| chr28                                 | 9772348 | 2 | 38 | A:0.763158                | G:0.236842     |
| chr28                                 | 9772580 | 2 | 36 | A:0.555556                | G:0.444444     |
| chr28                                 | 9772908 | 2 | 38 | T:0.710526                | C:0.289474     |
| chr28                                 | 9772982 | 2 | 40 | ATG:0.725                 | A:0.275        |
| chr28                                 | 9772985 | 2 | 40 | CCAGTGTAA:0.725           | C:0.275        |
| chr28                                 | 9773464 | 2 | 36 | C:0.916667                | T:0.0833333    |
| chr28                                 | 9773787 | 2 | 34 | A:0.764706                | G:0.235294     |
| chr28                                 | 9773853 | 2 | 36 | A:0.583333                | G:0.416667     |
| chr28                                 | 9773867 | 2 | 36 | C:0.75                    | T:0.25         |
| chr28                                 | 9774139 | 2 | 36 | G:0.777778                | A:0.222222     |
| chr28                                 | 9774505 | 2 | 36 | A:0.888889                | G:0.111111     |
| chr28                                 | 9774726 | 2 | 38 | C:0.394737                | T:0.605263     |
| chr28                                 | 9774815 | 2 | 36 | C:0.638889                | T:0.361111     |
| chr28                                 | 9775141 | 2 | 38 | G:0.631579                | A:0.368421     |
| chr28                                 | 9775184 | 2 | 38 | T:0.894737                | TC:0.105263    |
| chr28                                 | 9775707 | 2 | 36 | C:0.777778                | T:0.222222     |
| chr28                                 | 9775881 | 2 | 38 | G:0.710526                | GAA:0.289474   |
| chr28                                 | 9776378 | 2 | 32 | T:0.375                   | C:0.625        |
| chr28                                 | 9776533 | 2 | 36 | C:0.555556                | T:0.444444     |

|       |         |   |    |                 |             |
|-------|---------|---|----|-----------------|-------------|
| chr28 | 9776550 | 2 | 34 | T:0.705882      | TC:0.294118 |
| chr28 | 9777051 | 2 | 38 | G:0.631579      | A:0.368421  |
| chr28 | 9777185 | 2 | 40 | G:0.725 C:0.275 |             |
| chr28 | 9777308 | 2 | 38 | T:0.789474      | C:0.210526  |
| chr28 | 9777424 | 2 | 34 | T:0.764706      | C:0.235294  |
| chr28 | 9777623 | 2 | 34 | T:0.676471      | C:0.323529  |
| chr28 | 9777957 | 2 | 38 | C:0.763158      | A:0.236842  |
| chr28 | 9777990 | 2 | 38 | T:0.578947      | A:0.421053  |
| chr28 | 9778333 | 2 | 40 | C:1 T:0         |             |
| chr28 | 9778511 | 2 | 38 | C:0.789474      | T:0.210526  |
| chr28 | 9778650 | 2 | 38 | CT:0.736842     | C:0.263158  |
| chr28 | 9778713 | 2 | 36 | T:0.333333      | G:0.666667  |
| chr28 | 9779028 | 2 | 36 | A:0.333333      | G:0.666667  |
| chr28 | 9779184 | 2 | 34 | A:0 G:1         |             |
| chr28 | 9779188 | 2 | 34 | A:0.823529      | G:0.176471  |
| chr28 | 9779472 | 2 | 36 | C:1 T:0         |             |
| chr28 | 9779502 | 2 | 36 | G:0.25 A:0.75   |             |
| chr28 | 9779585 | 2 | 36 | G:0.861111      | A:0.138889  |
| chr28 | 9779744 | 2 | 36 | G:0.722222      | A:0.277778  |
| chr28 | 9779765 | 2 | 36 | C:0.611111      | T:0.388889  |
| chr28 | 9779849 | 2 | 38 | G:0 C:1         |             |
| chr28 | 9779986 | 2 | 38 | C:0.842105      | G:0.157895  |
| chr28 | 9780107 | 2 | 38 | T:0.842105      | C:0.157895  |
| chr28 | 9780582 | 2 | 22 | GAAAA:0 G:1     |             |
| chr28 | 9780586 | 2 | 22 | A:0 AGGCGC:1    |             |
| chr28 | 9781109 | 2 | 28 | CT:0.428571     | C:0.571429  |
| chr28 | 9781370 | 2 | 32 | G:0.59375       | A:0.40625   |
| chr28 | 9781580 | 2 | 36 | T:0.472222      | C:0.527778  |
| chr28 | 9781610 | 2 | 36 | A:0.5 G:0.5     |             |
| chr28 | 9781893 | 2 | 36 | C:0.583333      | T:0.416667  |
| chr28 | 9782443 | 2 | 34 | T:0.647059      | G:0.352941  |
| chr28 | 9782499 | 2 | 36 | G:0.916667      | A:0.0833333 |
| chr28 | 9782808 | 2 | 22 | A:0.954545      | T:0.0454545 |
| chr28 | 9782809 | 2 | 22 | C:0.954545      | A:0.0454545 |
| chr28 | 9782819 | 2 | 20 | G:0.65 T:0.35   |             |
| chr28 | 9782979 | 2 | 30 | C:1 T:0         |             |
| chr28 | 9783183 | 2 | 32 | C:0 G:1         |             |
| chr28 | 9783199 | 2 | 36 | T:0.944444      | C:0.0555556 |
| chr28 | 9783448 | 2 | 32 | T:0.59375       | C:0.40625   |
| chr28 | 9783582 | 2 | 36 | C:0.861111      | A:0.138889  |
| chr28 | 9783784 | 2 | 38 | A:0.842105      | G:0.157895  |
| chr28 | 9783843 | 2 | 40 | G:0.475 T:0.525 |             |
| chr28 | 9783881 | 2 | 40 | T:0.475 G:0.525 |             |
| chr28 | 9784009 | 2 | 40 | G:0.45 C:0.55   |             |
| chr28 | 9784056 | 2 | 40 | G:0.65 A:0.35   |             |
| chr28 | 9784260 | 2 | 36 | C:0.638889      | T:0.361111  |
| chr28 | 9784474 | 2 | 36 | T:0.916667      | C:0.0833333 |
| chr28 | 9784506 | 2 | 34 | C:0.588235      | T:0.411765  |
| chr28 | 9784586 | 2 | 36 | C:1 G:0         |             |
| chr28 | 9784588 | 2 | 36 | G:0.694444      | A:0.305556  |
| chr28 | 9784622 | 2 | 36 | T:0.888889      | C:0.111111  |
| chr28 | 9784780 | 2 | 40 | T:0.925 G:0.075 |             |
| chr28 | 9785095 | 2 | 34 | C:0.911765      | A:0.0882353 |
| chr28 | 9785624 | 2 | 38 | C:0.894737      | T:0.105263  |

|       |         |   |    |             |         |                 |
|-------|---------|---|----|-------------|---------|-----------------|
| chr28 | 9785777 | 2 | 40 | T:0.875     | C:0.125 |                 |
| chr28 | 9785850 | 2 | 40 | G:0.9       | A:0.1   |                 |
| chr28 | 9785965 | 2 | 36 | T:0.916667  |         | G:0.0833333     |
| chr28 | 9786023 | 2 | 38 | G:1         | A:0     |                 |
| chr28 | 9786138 | 2 | 32 | A:0.875     | G:0.125 |                 |
| chr28 | 9786603 | 2 | 36 | G:0.916667  |         | T:0.0833333     |
| chr28 | 9786794 | 2 | 36 | G:0.972222  |         | A:0.0277778     |
| chr28 | 9786881 | 2 | 34 | C:0.882353  |         | T:0.117647      |
| chr28 | 9786990 | 2 | 38 | C:0.710526  |         | T:0.289474      |
| chr28 | 9787175 | 2 | 32 | A:0.875     | G:0.125 |                 |
| chr28 | 9787339 | 2 | 40 | C:0.875     | T:0.125 |                 |
| chr28 | 9787422 | 2 | 36 | T:0.861111  |         | C:0.138889      |
| chr28 | 9787520 | 2 | 36 | T:0.888889  |         | G:0.111111      |
| chr28 | 9787968 | 2 | 40 | A:0.9       | G:0.1   |                 |
| chr28 | 9788045 | 2 | 36 | G:0.833333  |         | A:0.166667      |
| chr28 | 9788135 | 2 | 36 | T:0.888889  |         | A:0.111111      |
| chr28 | 9788454 | 2 | 40 | G:0.825     | A:0.175 |                 |
| chr28 | 9788807 | 2 | 34 | G:0.852941  |         | A:0.147059      |
| chr28 | 9788899 | 2 | 38 | T:0.894737  |         | A:0.105263      |
| chr28 | 9789035 | 2 | 34 | CT:0.941176 |         | C:0.0588235     |
| chr28 | 9789068 | 2 | 38 | C:0.894737  |         | CAAAT:0.105263  |
| chr28 | 9789180 | 2 | 32 | C:0.875     | T:0.125 |                 |
| chr28 | 9789612 | 2 | 34 | T:0.882353  |         | C:0.117647      |
| chr28 | 9789645 | 2 | 36 | G:0         | A:1     |                 |
| chr28 | 9789859 | 2 | 34 | C:0.882353  |         | A:0.117647      |
| chr28 | 9790016 | 2 | 34 | T:0.911765  |         | TAGCC:0.0882353 |
| chr28 | 9790026 | 2 | 34 | TA:0.941176 |         | T:0.0588235     |
| chr28 | 9790074 | 2 | 32 | C:0.90625   |         | T:0.09375       |
| chr28 | 9790405 | 2 | 36 | C:1         | T:0     |                 |
| chr28 | 9790419 | 2 | 36 | G:0.916667  |         | A:0.0833333     |
| chr28 | 9790455 | 2 | 34 | T:0.382353  |         | C:0.617647      |
| chr28 | 9790526 | 2 | 36 | A:0.833333  |         | G:0.166667      |
| chr28 | 9790662 | 2 | 38 | C:0.868421  |         | T:0.131579      |
| chr28 | 9791240 | 2 | 38 | A:0.921053  |         | AAG:0.0789474   |
| chr28 | 9791601 | 2 | 40 | G:0.9       | A:0.1   |                 |
| chr28 | 9791611 | 2 | 40 | C:0.9       | T:0.1   |                 |
| chr28 | 9792278 | 2 | 32 | T:0.59375   |         | TA:0.40625      |
| chr28 | 9792359 | 2 | 38 | G:0.842105  |         | T:0.157895      |
| chr28 | 9792736 | 2 | 38 | C:1         | T:0     |                 |
| chr28 | 9792838 | 2 | 38 | G:0.921053  |         | C:0.0789474     |
| chr28 | 9792888 | 2 | 38 | AC:0.894737 |         | A:0.105263      |
| chr28 | 9793291 | 2 | 40 | G:1         | A:0     |                 |
| chr28 | 9793351 | 2 | 38 | C:1         | T:0     |                 |
| chr28 | 9793488 | 2 | 36 | G:1         | A:0     |                 |
| chr28 | 9793596 | 2 | 38 | C:0.894737  |         | T:0.105263      |
| chr28 | 9793667 | 2 | 40 | G:0.95      | A:0.05  |                 |
| chr28 | 9793740 | 2 | 38 | G:0.894737  |         | T:0.105263      |
| chr28 | 9793897 | 2 | 38 | G:0.894737  |         | A:0.105263      |
| chr28 | 9793969 | 2 | 36 | A:0.916667  |         | G:0.0833333     |
| chr28 | 9793999 | 2 | 38 | G:0.631579  |         | GA:0.368421     |
| chr28 | 9794014 | 2 | 40 | AT:0.85     | A:0.15  |                 |
| chr28 | 9794053 | 2 | 32 | A:0.84375   |         | G:0.15625       |
| chr28 | 9794505 | 2 | 38 | A:1         | G:0     |                 |
| chr28 | 9794625 | 2 | 38 | A:1         | G:0     |                 |

|                 |                      |   |    |                   |          |              |
|-----------------|----------------------|---|----|-------------------|----------|--------------|
| chr28           | 9795001              | 2 | 34 | C:1               | T:0      |              |
| chr28           | 9795058              | 2 | 36 | C:0.861111        |          | G:0.138889   |
| chr28           | 9795444              | 2 | 38 | A:0               | G:1      |              |
| chr28           | 9795515              | 2 | 34 | T:0               | C:1      |              |
| chr28           | 9795678              | 2 | 36 | A:0.861111        |          | G:0.138889   |
| chr28           | 9795826              | 2 | 40 | CT:1              | C:0      |              |
| chr28           | 9795946              | 2 | 36 | A:0               | G:1      |              |
| chr28           | 9795986              | 2 | 36 | T:0.861111        |          | C:0.138889   |
| chr28           | 9796648              | 2 | 34 | C:0               | T:1      |              |
| chr28           | 9796896              | 2 | 36 | T:0.944444        |          | C:0.0555556  |
| chr28           | 9797057              | 2 | 40 | C:0.875           | A:0.125  |              |
| chr28           | 9797235              | 2 | 36 | T:1               | C:0      |              |
| chr28           | 9797265              | 2 | 40 | T:0.9             | C:0.1    |              |
| chr28           | 9797266              | 2 | 40 | G:0.9             | A:0.1    |              |
| chr28           | 9797282              | 2 | 40 | C:1               | T:0      |              |
| chr28           | 9797798              | 2 | 40 | G:1               | A:0      |              |
| chr28           | 9798027              | 2 | 36 | C:0.5             | T:0.5    |              |
| chr28           | 9798108              | 2 | 34 | G:1               | A:0      |              |
| chr28           | 9798234              | 2 | 38 | T:1               | C:0      |              |
| chr28           | 9800437              | 2 | 40 | A:0               | G:1      |              |
| chr28           | 9800547              | 5 | 38 | C:0.157895        |          | CA:0.0789474 |
| CAA:0.0263158   | CAAAAA:0.552632      |   |    | CAAAAAAA:0.184211 |          |              |
| chr28           | 9801138              | 2 | 38 | C:1               | T:0      |              |
| chr28           | 9801139              | 2 | 38 | A:1               | G:0      |              |
| chr28           | 9801402              | 2 | 32 | G:1               | T:0      |              |
| chr28           | 9801683              | 2 | 34 | C:1               | T:0      |              |
| chr28           | 9802136              | 2 | 34 | C:1               | G:0      |              |
| chr28           | 9802306              | 2 | 32 | C:1               | T:0      |              |
| chr28           | 9802363              | 4 | 34 | C:0.0588235       |          | CA:0 CAAAA:  |
| 0.529412        | CAAAAA:0.411765      |   |    |                   |          |              |
| chr28           | 9802788              | 2 | 36 | G:0.0277778       |          | A:0.972222   |
| chr28           | 9802920              | 3 | 32 | GAA:0.09375       |          | G:0.1875 GA: |
| 0.71875         |                      |   |    |                   |          |              |
| chr28           | 9803120              | 2 | 36 | C:0.833333        |          | T:0.166667   |
| chr28           | 9803834              | 2 | 36 | G:0.833333        |          | A:0.166667   |
| chr28           | 9803869              | 2 | 36 | G:0.888889        |          | A:0.111111   |
| chr28           | 9804295              | 2 | 40 | G:0.9             | A:0.1    |              |
| chr28           | 9804465              | 2 | 40 | T:0.9             | C:0.1    |              |
| chr28           | 9804556              | 2 | 40 | T:0.925           | TA:0.075 |              |
| chr28           | 9804561              | 2 | 40 | T:0.925           | C:0.075  |              |
| chr28           | 9804876              | 2 | 38 | C:0.894737        |          | T:0.105263   |
| chr28           | 9805551              | 2 | 38 | T:0.789474        |          | C:0.210526   |
| chr28           | 9805552              | 2 | 38 | G:0.789474        |          | C:0.210526   |
| chr28           | 9805581              | 2 | 40 | A:0               | ACT:1    |              |
| chr28           | 9806859              | 2 | 34 | A:1               | G:0      |              |
| chr28           | 9807002              | 4 | 38 | AAC:0.210526      |          | A:0.289474   |
| AACAC:0.0789474 | AACACACACAC:0.421053 |   |    |                   |          |              |
| chr28           | 9807618              | 2 | 36 | A:0.638889        |          | G:0.361111   |
| chr28           | 9808169              | 2 | 38 | A:0.815789        |          | C:0.184211   |
| chr28           | 9808283              | 2 | 38 | A:0.105263        |          | G:0.894737   |
| chr28           | 9808530              | 2 | 36 | G:0.666667        |          | A:0.333333   |
| chr28           | 9809053              | 2 | 36 | G:0.611111        |          | A:0.388889   |
| chr28           | 9809286              | 2 | 36 | G:0.388889        |          | T:0.611111   |
| chr28           | 9809566              | 2 | 38 | C:0.631579        |          | T:0.368421   |

|                               |         |   |    |                           |                  |
|-------------------------------|---------|---|----|---------------------------|------------------|
| chr28                         | 9810156 | 2 | 38 | C:0.631579                | G:0.368421       |
| chr28                         | 9810157 | 2 | 38 | A:0 G:1                   |                  |
| chr28                         | 9810435 | 2 | 34 | G:0.647059                | A:0.352941       |
| chr28                         | 9810671 | 2 | 34 | GAGA:0.352941             | G:0.647059       |
| chr28                         | 9810895 | 2 | 36 | A:0.666667                | G:0.333333       |
| chr28                         | 9811110 | 2 | 38 | G:0.578947                | A:0.421053       |
| chr28                         | 9811232 | 2 | 34 | G:0.558824                | C:0.441176       |
| chr28                         | 9811910 | 2 | 40 | C:0.625 T:0.375           |                  |
| chr28                         | 9812192 | 2 | 38 | C:0.5 T:0.5               |                  |
| chr28                         | 9812358 | 2 | 36 | G:0.555556                | A:0.444444       |
| chr28                         | 9812908 | 2 | 38 | T:0.631579                | A:0.368421       |
| chr28                         | 9812918 | 3 | 38 | AGTGTGTGTGTGTGT:0.0263158 | A:               |
| 0.421053 AGTGTGTGTGT:0.552632 |         |   |    |                           |                  |
| chr28                         | 9813361 | 2 | 30 | T:0 G:1                   |                  |
| chr28                         | 9813377 | 2 | 32 | G:0.53125                 | A:0.46875        |
| chr28                         | 9813701 | 2 | 36 | C:0.527778                | A:0.472222       |
| chr28                         | 9814165 | 2 | 38 | C:0.447368                | T:0.552632       |
| chr28                         | 9814419 | 3 | 40 | GAA:0.45 G:0.225          | GAAAA:0.325      |
| chr28                         | 9814618 | 2 | 38 | G:0.631579                | T:0.368421       |
| chr28                         | 9814674 | 2 | 38 | A:0.0526316               | G:0.947368       |
| chr28                         | 9814903 | 2 | 38 | C:0.552632                | T:0.447368       |
| chr28                         | 9814907 | 2 | 38 | T:1 A:0                   |                  |
| chr28                         | 9815148 | 2 | 38 | A:0.0263158               | G:0.973684       |
| chr28                         | 9815254 | 2 | 36 | T:0.694444                | TTAATAA:0.305556 |
| chr28                         | 9815653 | 2 | 32 | G:0.03125                 | A:0.96875        |
| chr28                         | 9815684 | 2 | 38 | G:1 A:0                   |                  |
| chr28                         | 9815850 | 2 | 38 | G:0.578947                | A:0.421053       |
| chr28                         | 9816208 | 2 | 40 | T:0.025 C:0.975           |                  |
| chr28                         | 9816217 | 2 | 40 | C:0.025 A:0.975           |                  |
| chr28                         | 9817044 | 2 | 36 | A:0.555556                | G:0.444444       |
| chr28                         | 9817417 | 2 | 40 | G:0.15 A:0.85             |                  |
| chr28                         | 9817556 | 2 | 34 | T:0.588235                | C:0.411765       |
| chr28                         | 9818005 | 3 | 38 | A:0.105263                | G:0.5 T:         |
| 0.394737                      |         |   |    |                           |                  |
| chr28                         | 9818139 | 2 | 38 | G:0.131579                | A:0.868421       |
| chr28                         | 9818302 | 2 | 38 | C:1 T:0                   |                  |
| chr28                         | 9818360 | 2 | 38 | GGTGA:0.894737            | G:0.105263       |
| chr28                         | 9818551 | 2 | 38 | T:0.210526                | C:0.789474       |
| chr28                         | 9818586 | 2 | 32 | G:0.1875 A:0.8125         |                  |
| chr28                         | 9818719 | 2 | 40 | C:0.15 T:0.85             |                  |
| chr28                         | 9818756 | 2 | 40 | C:0.175 T:0.825           |                  |
| chr28                         | 9819007 | 2 | 38 | T:0.184211                | C:0.815789       |
| chr28                         | 9820122 | 2 | 38 | T:1 A:0                   |                  |
| chr28                         | 9820376 | 2 | 38 | G:0.0263158               | C:0.973684       |
| chr28                         | 9821600 | 2 | 34 | T:1 C:0                   |                  |
| chr28                         | 9821617 | 2 | 32 | A:0.90625                 | AAAAC:0.09375    |
| chr28                         | 9821736 | 2 | 36 | G:0.888889                | A:0.111111       |
| chr28                         | 9822122 | 2 | 38 | GAA:1 G:0                 |                  |
| chr28                         | 9822210 | 2 | 38 | C:0.0263158               | T:0.973684       |
| chr28                         | 9822230 | 2 | 36 | A:0.027778                | C:0.972222       |
| chr28                         | 9822659 | 2 | 38 | G:0.0263158               | A:0.973684       |
| chr28                         | 9822684 | 2 | 38 | C:0.157895                | T:0.842105       |
| chr28                         | 9822815 | 2 | 38 | T:0.0263158               | C:0.973684       |
| chr28                         | 9822998 | 2 | 38 | C:0.973684                | CA:0.0263158     |

|            |         |                   |    |                       |             |
|------------|---------|-------------------|----|-----------------------|-------------|
| chr28      | 9823379 | 2                 | 36 | G:0.833333            | T:0.166667  |
| chr28      | 9823507 | 2                 | 34 | T:0.882353            | C:0.117647  |
| chr28      | 9823706 | 2                 | 38 | G:0.578947            | A:0.421053  |
| chr28      | 9824113 | 2                 | 34 | A:0.411765            | G:0.588235  |
| chr28      | 9824436 | 2                 | 38 | T:0.921053            | G:0.0789474 |
| chr28      | 9824554 | 2                 | 36 | C:0.555556            | T:0.444444  |
| chr28      | 9824573 | 2                 | 36 | C:0.611111            | A:0.388889  |
| chr28      | 9824820 | 2                 | 22 | A:0.363636            | T:0.636364  |
| chr28      | 9824902 | 2                 | 38 | G:0.0263158           | A:0.973684  |
| chr28      | 9825043 | 2                 | 36 | A:1                   | G:0         |
| chr28      | 9825151 | 2                 | 40 | CTTTTTTTTTT:0.65      | C:0.35      |
| chr28      | 9825239 | 2                 | 38 | T:0.921053            | C:0.0789474 |
| chr28      | 9825274 | 2                 | 40 | T:0.5                 | C:0.5       |
| chr28      | 9825381 | 2                 | 32 | T:0.5                 | C:0.5       |
| chr28      | 9825714 | 2                 | 38 | C:1                   | T:0         |
| chr28      | 9825812 | 2                 | 40 | T:0.425               | C:0.575     |
| chr28      | 9826285 | 2                 | 34 | G:1                   | A:0         |
| chr28      | 9826483 | 2                 | 36 | GAAGT:0.611111        | G:0.388889  |
| chr28      | 9826672 | 2                 | 38 | C:0.473684            | T:0.526316  |
| chr28      | 9827433 | 2                 | 36 | TTTTTC:0.861111       | T:0.138889  |
| chr28      | 9827734 | 2                 | 38 | A:0.473684            | C:0.526316  |
| chr28      | 9827865 | 2                 | 40 | C:0.5                 | T:0.5       |
| chr28      | 9828526 | 2                 | 38 | C:0.473684            | A:0.526316  |
| chr28      | 9828545 | 2                 | 36 | TACACACACAA:1         | T:0         |
| chr28      | 9828555 | 4                 | 40 | AACACACACACACAC:0.325 | A:0.125     |
| AACAC:0.55 |         | CACACACACACACAC:0 |    |                       |             |
| chr28      | 9828679 | 2                 | 36 | C:0.5                 | A:0.5       |
| chr28      | 9828690 | 2                 | 40 | TACAA:0.475           | T:0.525     |
| chr28      | 9828927 | 2                 | 38 | C:0.5                 | T:0.5       |
| chr28      | 9829025 | 2                 | 38 | C:0.789474            | T:0.210526  |
| chr28      | 9829252 | 2                 | 38 | T:0.421053            | C:0.578947  |
| chr28      | 9829295 | 2                 | 38 | T:0.473684            | A:0.526316  |
| chr28      | 9829352 | 2                 | 38 | T:0.526316            | G:0.473684  |
| chr28      | 9829354 | 2                 | 38 | G:0.526316            | A:0.473684  |
| chr28      | 9829438 | 2                 | 36 | G:0.583333            | A:0.416667  |
| chr28      | 9830182 | 2                 | 38 | G:0.447368            | T:0.552632  |
| chr28      | 9830309 | 2                 | 38 | T:0.5                 | TA:0.5      |
| chr28      | 9830679 | 2                 | 40 | T:0.025               | TA:0.975    |
| chr28      | 9830811 | 2                 | 38 | C:1                   | A:0         |
| chr28      | 9831040 | 2                 | 38 | G:0.421053            | A:0.578947  |
| chr28      | 9831068 | 2                 | 36 | C:0.388889            | T:0.611111  |
| chr28      | 9831687 | 2                 | 40 | T:0.475               | C:0.525     |
| chr28      | 9831751 | 2                 | 40 | T:0.425               | C:0.575     |
| chr28      | 9832026 | 2                 | 36 | A:1                   | G:0         |
| chr28      | 9832433 | 2                 | 38 | T:0.5                 | C:0.5       |
| chr28      | 9832538 | 2                 | 38 | A:0.368421            | G:0.631579  |
| chr28      | 9832873 | 2                 | 36 | CT:0.472222           | C:0.527778  |
| chr28      | 9833889 | 2                 | 34 | CTT:1                 | C:0         |
| chr28      | 9833997 | 2                 | 38 | T:0.552632            | C:0.447368  |
| chr28      | 9834032 | 2                 | 38 | G:0.5                 | C:0.5       |
| chr28      | 9834344 | 2                 | 38 | G:0.421053            | A:0.578947  |
| chr28      | 9834526 | 2                 | 40 | G:0.825               | A:0.175     |
| chr28      | 9834887 | 2                 | 36 | T:0.416667            | G:0.583333  |
| chr28      | 9835154 | 2                 | 38 | T:0.921053            | C:0.0789474 |

|                |         |   |    |                   |                  |
|----------------|---------|---|----|-------------------|------------------|
| chr28          | 9835283 | 2 | 38 | T:0.894737        | G:0.105263       |
| chr28          | 9835327 | 2 | 38 | T:0.947368        | C:0.0526316      |
| chr28          | 9836035 | 2 | 32 | C:0.90625         | G:0.09375        |
| chr28          | 9836232 | 2 | 36 | T:0.833333        | TGAGAGA:0.166667 |
| chr28          | 9836370 | 2 | 32 | C:0.90625         | T:0.09375        |
| chr28          | 9836413 | 2 | 34 | ATGTG:0.5         | A:0.5            |
| chr28          | 9836440 | 2 | 36 | TGTGTGC:0.916667  | T:0.0833333      |
| chr28          | 9836868 | 2 | 38 | C:0.894737        | T:0.105263       |
| chr28          | 9836958 | 2 | 38 | C:1 T:0           |                  |
| chr28          | 9837299 | 2 | 38 | C:0.631579        | T:0.368421       |
| chr28          | 9837424 | 2 | 38 | C:0.868421        | G:0.131579       |
| chr28          | 9837820 | 2 | 36 | C:0.888889        | T:0.111111       |
| chr28          | 9838398 | 2 | 40 | A:0.975 G:0.025   |                  |
| chr28          | 9838524 | 2 | 38 | G:0.947368        | A:0.0526316      |
| chr28          | 9838729 | 2 | 36 | G:0.888889        | A:0.111111       |
| chr28          | 9839753 | 3 | 36 | G:0.583333        | GAT:0.305556     |
| GATAT:0.111111 |         |   |    |                   |                  |
| chr28          | 9839853 | 2 | 28 | C:0.142857        | CCT:0.857143     |
| chr28          | 9840164 | 2 | 36 | A:0.527778        | G:0.472222       |
| chr28          | 9840384 | 2 | 36 | T:0.805556        | G:0.194444       |
| chr28          | 9840452 | 2 | 36 | A:0.833333        | T:0.166667       |
| chr28          | 9840554 | 2 | 40 | T:0.85 C:0.15     |                  |
| chr28          | 9841083 | 2 | 38 | C:0.631579        | G:0.368421       |
| chr28          | 9841148 | 2 | 38 | C:1 T:0           |                  |
| chr28          | 9841160 | 2 | 38 | G:0.894737        | A:0.105263       |
| chr28          | 9842075 | 2 | 36 | G:0.833333        | A:0.166667       |
| chr28          | 9842205 | 3 | 38 | T:0.868421        | TAA:0.0789474    |
| TAAA:0.0526316 |         |   |    |                   |                  |
| chr28          | 9842215 | 3 | 38 | TA:0.5 T:0.368421 | AA:              |
| 0.131579       |         |   |    |                   |                  |
| chr28          | 9842217 | 2 | 36 | A:0.916667        | T:0.0833333      |
| chr28          | 9842220 | 2 | 36 | A:0.583333        | T:0.416667       |
| chr28          | 9842238 | 3 | 38 | A:0.0526316       | AT:0.815789      |
| AAT:0.131579   |         |   |    |                   |                  |
| chr28          | 9842322 | 2 | 38 | C:0.868421        | T:0.131579       |
| chr28          | 9842442 | 2 | 36 | G:0.861111        | C:0.138889       |
| chr28          | 9842543 | 2 | 38 | A:0.842105        | T:0.157895       |
| chr28          | 9842745 | 2 | 38 | C:0.842105        | T:0.157895       |
| chr28          | 9843409 | 2 | 32 | T:0.84375         | C:0.15625        |
| chr28          | 9843430 | 2 | 32 | T:0.84375         | C:0.15625        |
| chr28          | 9843567 | 2 | 38 | T:0.815789        | TAA:0.184211     |
| chr28          | 9843654 | 2 | 34 | G:0.558824        | C:0.441176       |
| chr28          | 9843795 | 2 | 0  | C:-nan T:-nan     |                  |
| chr28          | 9843984 | 2 | 36 | T:0.916667        | C:0.0833333      |
| chr28          | 9843998 | 2 | 38 | G:0.447368        | A:0.552632       |
| chr28          | 9844064 | 2 | 38 | G:1 GAT:0         |                  |
| chr28          | 9844773 | 2 | 34 | C:1 T:0           |                  |
| chr28          | 9844863 | 3 | 36 | CA:0.638889       | C:0.0833333      |
| CAA:0.277778   |         |   |    |                   |                  |
| chr28          | 9844902 | 2 | 38 | C:0.921053        | T:0.0789474      |
| chr28          | 9845152 | 2 | 38 | G:0.894737        | A:0.105263       |
| chr28          | 9845180 | 2 | 38 | A:0.894737        | T:0.105263       |
| chr28          | 9845491 | 2 | 32 | A:0.90625         | G:0.09375        |
| chr28          | 9845837 | 2 | 38 | TA:0.815789       | T:0.184211       |



|                                                 |         |   |    |                |           |                |
|-------------------------------------------------|---------|---|----|----------------|-----------|----------------|
| chr28                                           | 9845981 | 2 | 30 | A:0.9          | G:0.1     |                |
| chr28                                           | 9846137 | 2 | 34 | A:0.882353     |           | G:0.117647     |
| chr28                                           | 9846192 | 3 | 38 | CAGAG:0.578947 |           | C:0.105263     |
| CAGAGAG:0.315789                                |         |   |    |                |           |                |
| chr28                                           | 9846229 | 2 | 38 | G:0.894737     |           | C:0.105263     |
| chr28                                           | 9846345 | 2 | 34 | TC:0.852941    |           | T:0.147059     |
| chr28                                           | 9846363 | 3 | 38 | T:0.210526     |           | TA:0.421053    |
| TAA:0.368421                                    |         |   |    |                |           |                |
| chr28                                           | 9846436 | 2 | 40 | G:1            | A:0       |                |
| chr28                                           | 9846461 | 2 | 38 | C:0.894737     |           | T:0.105263     |
| chr28                                           | 9846494 | 2 | 34 | T:0.911765     |           | C:0.0882353    |
| chr28                                           | 9846687 | 2 | 32 | C:0.875        | CCT:0.125 |                |
| chr28                                           | 9846729 | 2 | 32 | AT:0.59375     |           | A:0.40625      |
| chr28                                           | 9846731 | 2 | 32 | TTA:0.9375     |           | T:0.0625       |
| chr28                                           | 9846732 | 2 | 32 | TA:0.46875     |           | T:0.53125      |
| chr28                                           | 9847396 | 2 | 36 | C:0.861111     |           | T:0.138889     |
| chr28                                           | 9847506 | 2 | 36 | T:0.0277778    |           | C:0.972222     |
| chr28                                           | 9847533 | 2 | 34 | A:0.705882     |           | C:0.294118     |
| chr28                                           | 9848139 | 2 | 34 | T:0.882353     |           | C:0.117647     |
| chr28                                           | 9848246 | 2 | 34 | G:1            | A:0       |                |
| chr28                                           | 9848298 | 2 | 36 | A:0.0277778    |           | G:0.972222     |
| chr28                                           | 9849306 | 2 | 34 | C:0.0882353    |           | T:0.911765     |
| chr28                                           | 9849486 | 2 | 36 | A:0.888889     |           | AC:0.111111    |
| chr28                                           | 9849721 | 2 | 38 | A:0.157895     |           | C:0.842105     |
| chr28                                           | 9849820 | 2 | 38 | CACA:0.210526  |           | C:0.789474     |
| chr28                                           | 9849928 | 2 | 34 | A:0.147059     |           | T:0.852941     |
| chr28                                           | 9850403 | 2 | 40 |                |           |                |
| CTAGTAGCACCTAGTAGGTGGGAGAGTGAAGCGGGGCGAAG:0.025 |         |   |    |                |           |                |
| chr28                                           | 9850627 | 2 | 38 | A:0.947368     |           | G:0.0526316    |
| chr28                                           | 9850811 | 2 | 38 | AT:0.578947    |           | A:0.421053     |
| chr28                                           | 9850888 | 2 | 36 | C:0.138889     |           | CT:0.861111    |
| chr28                                           | 9850891 | 2 | 36 | A:0.138889     |           | T:0.861111     |
| chr28                                           | 9851276 | 2 | 40 | A:0.025        | C:0.975   |                |
| chr28                                           | 9851497 | 2 | 38 | A:0.868421     |           | G:0.131579     |
| chr28                                           | 9851627 | 2 | 38 | G:0.578947     |           | A:0.421053     |
| chr28                                           | 9851629 | 2 | 36 | TC:1           | T:0       |                |
| chr28                                           | 9851788 | 2 | 36 | C:0.583333     |           | T:0.416667     |
| chr28                                           | 9851888 | 2 | 34 | A:0.882353     |           | T:0.117647     |
| chr28                                           | 9852068 | 2 | 32 | TGGG:0.09375   |           | T:0.90625      |
| chr28                                           | 9852170 | 2 | 32 | ACCT:0.40625   |           | A:0.59375      |
| chr28                                           | 9852576 | 2 | 38 | A:0.868421     |           | G:0.131579     |
| chr28                                           | 9852994 | 2 | 38 | A:0.868421     |           | T:0.131579     |
| chr28                                           | 9853053 | 2 | 36 | G:0.527778     |           | A:0.472222     |
| chr28                                           | 9853304 | 2 | 34 | C:0.0294118    |           | T:0.970588     |
| chr28                                           | 9853494 | 2 | 34 | A:0.117647     |           | G:0.882353     |
| chr28                                           | 9853508 | 2 | 34 | A:0.0294118    |           | G:0.970588     |
| chr28                                           | 9853632 | 2 | 38 | C:0.184211     |           | CGAGG:0.815789 |
| chr28                                           | 9853923 | 2 | 34 | C:1            | A:0       |                |
| chr28                                           | 9854234 | 2 | 40 | C:0.175        | T:0.825   |                |
| chr28                                           | 9854412 | 2 | 36 | A:0.166667     |           | T:0.833333     |
| chr28                                           | 9854497 | 2 | 36 | AAC:1          | A:0       |                |
| chr28                                           | 9854514 | 2 | 38 | C:0.0526316    |           | G:0.947368     |
| chr28                                           | 9854797 | 2 | 38 | G:0.131579     |           | A:0.868421     |
| chr28                                           | 9855172 | 2 | 40 | A:0.15         | G:0.85    |                |

|                                       |         |   |    |                    |              |
|---------------------------------------|---------|---|----|--------------------|--------------|
| chr28                                 | 9855239 | 3 | 34 | C:0.0294118        | CT:0.0882353 |
| CTT:0.882353                          |         |   |    |                    |              |
| chr28                                 | 9855333 | 2 | 38 | A:0.131579         | C:0.868421   |
| chr28                                 | 9855871 | 2 | 36 | G:0.0833333        | A:0.916667   |
| chr28                                 | 9856031 | 2 | 38 | A:0.105263         | AG:0.894737  |
| chr28                                 | 9856260 | 2 | 38 | G:0.105263         | A:0.894737   |
| chr28                                 | 9856378 | 2 | 32 | G:0.09375          | C:0.90625    |
| chr28                                 | 9856454 | 2 | 38 | CA:1 C:0           |              |
| chr28                                 | 9856687 | 2 | 34 | A:0.0294118        | G:0.970588   |
| chr28                                 | 9856755 | 2 | 36 | C:0.111111         | T:0.888889   |
| chr28                                 | 9856858 | 2 | 36 | C:0.888889         | T:0.111111   |
| chr28                                 | 9857134 | 2 | 34 | T:0.205882         | C:0.794118   |
| chr28                                 | 9858708 | 2 | 36 | C:0.638889         | T:0.361111   |
| chr28                                 | 9859278 | 2 | 36 | C:0.583333         | T:0.416667   |
| chr28                                 | 9861136 | 4 | 34 | CCT:0.529412       | C:0.470588   |
| CCTCT:0 CCTCTCT:0                     |         |   |    |                    |              |
| chr28                                 | 9861190 | 3 | 28 | TA:0.5 T:0.0357143 | TAA:         |
| 0.464286                              |         |   |    |                    |              |
| chr28                                 | 9861661 | 2 | 40 | C:0.575 T:0.425    |              |
| chr28                                 | 9862142 | 2 | 40 | C:0.625 T:0.375    |              |
| chr28                                 | 9862228 | 2 | 26 | GGAGAGA:0.692308   | G:0.307692   |
| chr28                                 | 9862257 | 2 | 30 | GAGAGA:0.866667    | G:0.133333   |
| chr28                                 | 9862263 | 4 | 36 | GGC:0.722222       | GCGC:0.25    |
| G:0 GGCGC:0.0277778                   |         |   |    |                    |              |
| chr28                                 | 9862625 | 2 | 36 | T:1 C:0            |              |
| chr28                                 | 9862626 | 2 | 36 | C:1 T:0            |              |
| chr28                                 | 9862661 | 2 | 38 | C:1 T:0            |              |
| chr28                                 | 9862727 | 2 | 38 | C:1 G:0            |              |
| chr28                                 | 9862798 | 2 | 34 | G:0.558824         | A:0.441176   |
| chr28                                 | 9863474 | 2 | 40 | C:1 A:0            |              |
| chr28                                 | 9863582 | 2 | 32 | A:1 ATG:0          |              |
| chr28                                 | 9863699 | 2 | 38 | G:0.684211         | A:0.315789   |
| chr28                                 | 9863896 | 2 | 34 | C:1 T:0            |              |
| chr28                                 | 9864348 | 2 | 38 | G:1 A:0            |              |
| chr28                                 | 9864350 | 2 | 38 | T:1 TA:0           |              |
| chr28                                 | 9864458 | 2 | 40 | C:1 T:0            |              |
| chr28                                 | 9864476 | 2 | 40 | A:0.025 G:0.975    |              |
| chr28                                 | 9864707 | 2 | 38 | T:1 A:0            |              |
| chr28                                 | 9864884 | 2 | 36 | G:0.611111         | A:0.388889   |
| chr28                                 | 9865059 | 2 | 40 | A:1 G:0            |              |
| chr28                                 | 9865602 | 2 | 38 | C:1 A:0            |              |
| chr28                                 | 9865684 | 2 | 38 | A:0.157895         | G:0.842105   |
| chr28                                 | 9865692 | 2 | 38 | G:0.657895         | T:0.342105   |
| chr28                                 | 9865757 | 2 | 34 | C:1 A:0            |              |
| chr28                                 | 9865970 | 2 | 34 | C:1 T:0            |              |
| chr28                                 | 9866030 | 2 | 38 | C:1 T:0            |              |
| chr28                                 | 9866648 | 4 | 38 | TTTTA:0.315789     | T:0.0263158  |
| TTTTATTTA:0.552632 TTTTATTTA:0.105263 |         |   |    |                    |              |
| chr28                                 | 9866773 | 2 | 36 | C:1 T:0            |              |
| chr28                                 | 9867334 | 2 | 38 | G:1 A:0            |              |
| chr28                                 | 9867590 | 2 | 36 | G:1 A:0            |              |
| chr28                                 | 9867754 | 2 | 38 | T:0.105263         | C:0.894737   |
| chr28                                 | 9867842 | 2 | 34 | C:0.647059         | G:0.352941   |
| chr28                                 | 9867917 | 2 | 36 | C:1 G:0            |              |

|       |         |   |    |                    |                  |
|-------|---------|---|----|--------------------|------------------|
| chr28 | 9868206 | 2 | 38 | A:0.973684         | T:0.0263158      |
| chr28 | 9868291 | 2 | 38 | T:1 G:0            |                  |
| chr28 | 9868294 | 2 | 38 | T:0.184211         | C:0.815789       |
| chr28 | 9868531 | 2 | 36 | A:0.361111         | C:0.638889       |
| chr28 | 9868569 | 2 | 36 | T:0.555556         | C:0.444444       |
| chr28 | 9868623 | 2 | 36 | A:0.416667         | G:0.583333       |
| chr28 | 9868641 | 2 | 38 | G:0.947368         | A:0.0526316      |
| chr28 | 9868719 | 2 | 34 | G:0.5 T:0.5        |                  |
| chr28 | 9868812 | 2 | 40 | C:0.975 T:0.025    |                  |
| chr28 | 9868859 | 2 | 38 | A:1 C:0            |                  |
| chr28 | 9868965 | 2 | 38 | TG:0.552632        | T:0.447368       |
| chr28 | 9869492 | 2 | 32 | T:0.5625 TA:0.4375 |                  |
| chr28 | 9869832 | 2 | 38 | C:0.868421         | T:0.131579       |
| chr28 | 9869902 | 2 | 34 | C:0.882353         | T:0.117647       |
| chr28 | 9870157 | 2 | 40 | ATTAGT:0.975       | A:0.025          |
| chr28 | 9871663 | 2 | 38 | A:0.394737         | G:0.605263       |
| chr28 | 9872139 | 2 | 40 | T:0.575 C:0.425    |                  |
| chr28 | 9872724 | 2 | 40 | T:0.375 C:0.625    |                  |
| chr28 | 9872888 | 2 | 36 | T:0.583333         | A:0.416667       |
| chr28 | 9872930 | 2 | 38 | G:0.657895         | T:0.342105       |
| chr28 | 9873655 | 2 | 40 | G:0.925 T:0.075    |                  |
| chr28 | 9874827 | 2 | 40 | G:0.375 C:0.625    |                  |
| chr28 | 9875173 | 2 | 36 | A:1 G:0            |                  |
| chr28 | 9875181 | 2 | 38 | G:0.631579         | T:0.368421       |
| chr28 | 9875347 | 2 | 30 | G:0.366667         | A:0.633333       |
| chr28 | 9875558 | 2 | 36 | T:0.416667         | C:0.583333       |
| chr28 | 9875957 | 2 | 38 | GA:0.421053        | G:0.578947       |
| chr28 | 9876029 | 2 | 38 | C:0.789474         | T:0.210526       |
| chr28 | 9876312 | 2 | 34 | A:1 G:0            |                  |
| chr28 | 9876381 | 2 | 40 | T:1 TGGAGGGCCAC:0  |                  |
| chr28 | 9876550 | 2 | 36 | G:0.472222         | T:0.527778       |
| chr28 | 9877259 | 2 | 38 | T:0.421053         | C:0.578947       |
| chr28 | 9877592 | 2 | 40 | T:0.4 G:0.6        |                  |
| chr28 | 9877635 | 2 | 40 | G:0.625 GA:0.375   |                  |
| chr28 | 9877656 | 2 | 40 | T:0.475 A:0.525    |                  |
| chr28 | 9877730 | 2 | 40 | A:0.475 G:0.525    |                  |
| chr28 | 9878408 | 2 | 36 | C:0.416667         | G:0.583333       |
| chr28 | 9878831 | 2 | 36 | G:0.944444         | A:0.0555556      |
| chr28 | 9878967 | 2 | 34 | G:0.529412         | A:0.470588       |
| chr28 | 9879096 | 2 | 40 | T:0.875 A:0.125    |                  |
| chr28 | 9879617 | 2 | 36 | G:1 T:0            |                  |
| chr28 | 9880012 | 2 | 34 | C:0.294118         | T:0.705882       |
| chr28 | 9880112 | 2 | 32 | C:0.375 T:0.625    |                  |
| chr28 | 9880193 | 2 | 32 | G:0.875 A:0.125    |                  |
| chr28 | 9880387 | 2 | 32 | C:0.59375          | G:0.40625        |
| chr28 | 9880464 | 2 | 36 | CCA:0.944444       | C:0.0555556      |
| chr28 | 9880508 | 2 | 36 | G:0.416667         | A:0.583333       |
| chr28 | 9880510 | 2 | 36 | A:0.0833333        | G:0.916667       |
| chr28 | 9880537 | 2 | 30 | A:0.4 G:0.6        |                  |
| chr28 | 9880570 | 2 | 30 | G:0.833333         | A:0.166667       |
| chr28 | 9880870 | 2 | 36 | T:0.0833333        | TC:0.916667      |
| chr28 | 9880874 | 2 | 36 | T:0.0833333        | TCTACCA:0.916667 |
| chr28 | 9880964 | 2 | 36 | A:0.277778         | G:0.722222       |
| chr28 | 9881334 | 2 | 30 | C:0.733333         | G:0.266667       |

|              |         |   |    |               |         |                 |
|--------------|---------|---|----|---------------|---------|-----------------|
| chr28        | 9881668 | 2 | 30 | C:0.8         | T:0.2   |                 |
| chr28        | 9881779 | 2 | 40 | G:0.825       | T:0.175 |                 |
| chr28        | 9881780 | 3 | 38 | AT:0.657895   |         | A:0.236842      |
| ATT:0.105263 |         |   |    |               |         |                 |
| chr28        | 9881785 | 2 | 40 | T:0.825       | A:0.175 |                 |
| chr28        | 9882122 | 2 | 38 | A:0.815789    |         | G:0.184211      |
| chr28        | 9882387 | 2 | 38 | C:0.710526    |         | A:0.289474      |
| chr28        | 9882497 | 2 | 40 | T:0.85        | C:0.15  |                 |
| chr28        | 9882690 | 2 | 40 | T:1           | A:0     |                 |
| chr28        | 9882745 | 2 | 38 | G:0.710526    |         | A:0.289474      |
| chr28        | 9882816 | 2 | 40 | G:0.8         | A:0.2   |                 |
| chr28        | 9882890 | 2 | 36 | T:0           | C:1     |                 |
| chr28        | 9882931 | 2 | 36 | G:1           | A:0     |                 |
| chr28        | 9882979 | 2 | 40 | G:1           | A:0     |                 |
| chr28        | 9883080 | 2 | 34 | G:0.852941    |         | C:0.147059      |
| chr28        | 9883168 | 2 | 38 | CAG:0.289474  |         | C:0.710526      |
| chr28        | 9883170 | 2 | 36 | GA:0.916667   |         | G:0.0833333     |
| chr28        | 9883353 | 2 | 40 | T:0.1         | C:0.9   |                 |
| chr28        | 9883357 | 2 | 40 | C:1           | T:0     |                 |
| chr28        | 9883364 | 2 | 36 | A:0.0833333   |         | G:0.916667      |
| chr28        | 9883521 | 2 | 36 | C:0.138889    |         | T:0.861111      |
| chr28        | 9883583 | 2 | 34 | C:0.205882    |         | CCG:0.794118    |
| chr28        | 9883586 | 2 | 34 | A:0.205882    |         | C:0.794118      |
| chr28        | 9883756 | 2 | 32 | AT:0.125      | A:0.875 |                 |
| chr28        | 9883762 | 2 | 34 | G:0.941176    |         | C:0.0588235     |
| chr28        | 9884133 | 2 | 38 | G:0.894737    |         | A:0.105263      |
| chr28        | 9884153 | 2 | 36 | TA:1          | T:0     |                 |
| chr28        | 9884223 | 2 | 38 | G:0.921053    |         | A:0.0789474     |
| chr28        | 9884383 | 2 | 40 | T:0.1         | C:0.9   |                 |
| chr28        | 9884555 | 2 | 38 | T:0.789474    |         | G:0.210526      |
| chr28        | 9884681 | 2 | 36 | A:0.777778    |         | G:0.222222      |
| chr28        | 9884689 | 2 | 36 | G:1           | A:0     |                 |
| chr28        | 9884923 | 2 | 38 | A:0.789474    |         | G:0.210526      |
| chr28        | 9884992 | 2 | 36 | A:0.194444    |         | T:0.805556      |
| chr28        | 9885099 | 4 | 40 | T:0.05        | TA:0.1  | TAA:0.15 TAAAA: |
| 0.7          |         |   |    |               |         |                 |
| chr28        | 9885950 | 2 | 36 | ATCT:0.833333 |         | A:0.166667      |
| chr28        | 9886081 | 2 | 38 | T:1           | C:0     |                 |
| chr28        | 9886147 | 2 | 36 | T:0.138889    |         | C:0.861111      |
| chr28        | 9886881 | 2 | 36 | A:1           | T:0     |                 |
| chr28        | 9887013 | 2 | 40 | A:0.85        | G:0.15  |                 |
| chr28        | 9887087 | 2 | 30 | A:1           | C:0     |                 |
| chr28        | 9887412 | 2 | 36 | C:1           | T:0     |                 |
| chr28        | 9887429 | 2 | 34 | T:0.882353    |         | G:0.117647      |
| chr28        | 9887864 | 2 | 36 | A:1           | G:0     |                 |
| chr28        | 9888421 | 2 | 32 | G:1           | A:0     |                 |
| chr28        | 9888500 | 2 | 38 | C:0.921053    |         | A:0.0789474     |
| chr28        | 9889061 | 2 | 38 | C:1           | A:0     |                 |
| chr28        | 9889248 | 2 | 36 | A:0.833333    |         | G:0.166667      |
| chr28        | 9889768 | 2 | 38 | TA:0.210526   |         | T:0.789474      |
| chr28        | 9889985 | 2 | 36 | T:1           | A:0     |                 |
| chr28        | 9890004 | 2 | 40 | G:0.2         | T:0.8   |                 |
| chr28        | 9890114 | 2 | 36 | T:0.861111    |         | G:0.138889      |
| chr28        | 9890129 | 2 | 34 | T:0.852941    |         | A:0.147059      |

|       |         |   |    |              |          |               |
|-------|---------|---|----|--------------|----------|---------------|
| chr28 | 9890444 | 2 | 40 | C:0.9        | T:0.1    |               |
| chr28 | 9890455 | 2 | 40 | C:0.9        | T:0.1    |               |
| chr28 | 9890473 | 2 | 40 | A:0.9        | AC:0.1   |               |
| chr28 | 9890512 | 2 | 36 | G:0.861111   |          | A:0.138889    |
| chr28 | 9890523 | 2 | 36 | G:0.861111   |          | T:0.138889    |
| chr28 | 9890737 | 2 | 38 | A:0.842105   |          | T:0.157895    |
| chr28 | 9891212 | 2 | 32 | G:0.84375    |          | A:0.15625     |
| chr28 | 9891337 | 2 | 34 | G:1          | T:0      |               |
| chr28 | 9891404 | 2 | 36 | C:0.166667   |          | T:0.833333    |
| chr28 | 9891610 | 2 | 40 | C:0.875      | CT:0.125 |               |
| chr28 | 9891719 | 2 | 38 | C:0.868421   |          | T:0.131579    |
| chr28 | 9891795 | 2 | 40 | TG:0.85      | T:0.15   |               |
| chr28 | 9892170 | 2 | 40 | C:0.875      | T:0.125  |               |
| chr28 | 9892247 | 2 | 38 | A:0.947368   |          | G:0.0526316   |
| chr28 | 9892299 | 2 | 40 | T:0.85       | C:0.15   |               |
| chr28 | 9892543 | 2 | 40 | A:0.9        | C:0.1    |               |
| chr28 | 9892591 | 2 | 40 | T:0.85       | G:0.15   |               |
| chr28 | 9892766 | 2 | 38 | A:0.894737   |          | G:0.105263    |
| chr28 | 9892877 | 2 | 38 | C:0.263158   |          | A:0.736842    |
| chr28 | 9892943 | 2 | 36 | C:0.888889   |          | T:0.111111    |
| chr28 | 9893728 | 2 | 40 | T:0.25       | G:0.75   |               |
| chr28 | 9893742 | 2 | 40 | G:0.9        | C:0.1    |               |
| chr28 | 9893744 | 2 | 40 | A:0.9        | G:0.1    |               |
| chr28 | 9893812 | 2 | 36 | A:1          | G:0      |               |
| chr28 | 9893869 | 2 | 36 | C:0.666667   |          | G:0.333333    |
| chr28 | 9894369 | 2 | 34 | C:0.941176   |          | CTT:0.0588235 |
| chr28 | 9894394 | 2 | 36 | C:0.361111   |          | T:0.638889    |
| chr28 | 9894917 | 2 | 32 | A:0.84375    |          | G:0.15625     |
| chr28 | 9894930 | 2 | 32 | C:1          | T:0      |               |
| chr28 | 9895380 | 2 | 36 | T:1          | C:0      |               |
| chr28 | 9895399 | 2 | 38 | G:1          | A:0      |               |
| chr28 | 9895686 | 2 | 38 | C:1          | T:0      |               |
| chr28 | 9895992 | 2 | 26 | CT:0.423077  |          | C:0.576923    |
| chr28 | 9897009 | 2 | 30 | C:0.2        | T:0.8    |               |
| chr28 | 9897107 | 2 | 32 | C:1          | T:0      |               |
| chr28 | 9898734 | 2 | 32 | G:0.90625    |          | A:0.09375     |
| chr28 | 9898990 | 2 | 38 | A:1          | T:0      |               |
| chr28 | 9899121 | 2 | 36 | A:0.972222   |          | AT:0.0277778  |
| chr28 | 9900019 | 2 | 34 | C:1          | T:0      |               |
| chr28 | 9900260 | 2 | 38 | T:0.263158   |          | C:0.736842    |
| chr28 | 9902271 | 2 | 36 | C:1          | A:0      |               |
| chr28 | 9902493 | 2 | 34 | GTA:0.970588 |          | G:0.0294118   |
| chr28 | 9902507 | 2 | 34 | A:0.323529   |          | T:0.676471    |
| chr28 | 9902509 | 2 | 34 | A:0.205882   |          | T:0.794118    |
| chr28 | 9902511 | 2 | 34 | A:0.205882   |          | T:0.794118    |
| chr28 | 9902600 | 2 | 38 | T:0.710526   |          | C:0.289474    |
| chr28 | 9903002 | 2 | 38 | C:0.236842   |          | CA:0.763158   |
| chr28 | 9903712 | 2 | 40 | C:0.75       | T:0.25   |               |
| chr28 | 9904554 | 2 | 36 | G:0.888889   |          | A:0.111111    |
| chr28 | 9904665 | 2 | 36 | CT:0.666667  |          | C:0.333333    |
| chr28 | 9905089 | 2 | 34 | C:0.382353   |          | A:0.617647    |
| chr28 | 9905601 | 2 | 40 | A:0.85       | T:0.15   |               |
| chr28 | 9905625 | 2 | 38 | T:0.631579   |          | C:0.368421    |
| chr28 | 9906398 | 3 | 28 | C:0.535714   |          | CA:0.178571   |

CAA:0.285714

|                         |         |   |    |                        |          |                |          |
|-------------------------|---------|---|----|------------------------|----------|----------------|----------|
| chr28                   | 9906895 | 2 | 38 | T:1                    | A:0      |                |          |
| chr28                   | 9908236 | 2 | 36 | C:0.972222             |          | T:0.0277778    |          |
| chr28                   | 9908829 | 2 | 34 | TAC:1                  | T:0      |                |          |
| chr28                   | 9909116 | 2 | 40 | A:0.675                | T:0.325  |                |          |
| chr28                   | 9909253 | 3 | 32 | TA:0.84375             |          | T:0.15625      |          |
| TAA:0                   |         |   |    |                        |          |                |          |
| chr28                   | 9909408 | 2 | 38 | G:0.684211             |          | A:0.315789     |          |
| chr28                   | 9910182 | 2 | 38 | G:0.815789             |          | A:0.184211     |          |
| chr28                   | 9910194 | 2 | 40 | T:1                    | C:0      |                |          |
| chr28                   | 9910897 | 2 | 40 | C:0.4                  | CAA:0.6  |                |          |
| chr28                   | 9910907 | 2 | 40 | A:1                    | C:0      |                |          |
| chr28                   | 9910908 | 2 | 40 | C:0.3                  | A:0.7    |                |          |
| chr28                   | 9911166 | 2 | 36 | TACAGAC:0.555556       |          | T:0.444444     |          |
| chr28                   | 9911617 | 2 | 36 | C:0.277778             |          | A:0.722222     |          |
| chr28                   | 9912096 | 2 | 28 | TA:0.678571            |          | T:0.321429     |          |
| chr28                   | 9912205 | 2 | 38 | C:0.842105             |          | T:0.157895     |          |
| chr28                   | 9912296 | 2 | 38 | G:1                    | A:0      |                |          |
| chr28                   | 9912299 | 2 | 38 | C:1                    | A:0      |                |          |
| chr28                   | 9912740 | 2 | 36 | G:1                    | A:0      |                |          |
| chr28                   | 9913290 | 2 | 36 | G:0.666667             |          | A:0.333333     |          |
| chr28                   | 9914398 | 2 | 36 | G:0.972222             |          | GA:0.0277778   |          |
| chr28                   | 9914533 | 2 | 36 | C:0.777778             |          | CT:0.222222    |          |
| chr28                   | 9914702 | 2 | 36 | C:0.777778             |          | T:0.222222     |          |
| chr28                   | 9915736 | 3 | 38 | T:0.315789             |          | TA:0.605263    |          |
| TAA:0.0789474           |         |   |    |                        |          |                |          |
| chr28                   | 9916602 | 2 | 36 | C:0.805556             |          | T:0.194444     |          |
| chr28                   | 9916893 | 2 | 40 | AGG:0.35               | A:0.65   |                |          |
| chr28                   | 9916896 | 2 | 40 | T:0.35                 | TAG:0.65 |                |          |
| chr28                   | 9916898 | 3 | 40 | AAATGAT:0.125          |          | A:0.6          |          |
| ATAGTAATGAT:0.275       |         |   |    |                        |          |                |          |
| chr28                   | 9917159 | 2 | 38 | G:0.631579             |          | A:0.368421     |          |
| chr28                   | 9917550 | 2 | 38 | G:0.921053             |          | A:0.0789474    |          |
| chr28                   | 9917873 | 2 | 38 | T:0.894737             |          | A:0.105263     |          |
| chr28                   | 9917902 | 2 | 38 | C:0.184211             |          | CCA:0.815789   |          |
| chr28                   | 9917957 | 2 | 38 | C:0.157895             |          | G:0.842105     |          |
| chr28                   | 9918034 | 2 | 38 | C:0.421053             |          | T:0.578947     |          |
| chr28                   | 9918417 | 2 | 40 | A:0.275                | G:0.725  |                |          |
| chr28                   | 9918510 | 4 | 40 | ATGTGTGTG:0.275        |          | A:0.65         | ATGTGTG: |
| 0.075 ATGTGTGTGTGTGTG:0 |         |   |    |                        |          |                |          |
| chr28                   | 9918860 | 2 | 36 | T:0.388889             |          | C:0.611111     |          |
| chr28                   | 9918865 | 2 | 36 | T:0.416667             |          | TA:0.583333    |          |
| chr28                   | 9920614 | 2 | 36 | G:1                    | C:0      |                |          |
| chr28                   | 9920691 | 2 | 34 | A:0.794118             |          | C:0.205882     |          |
| chr28                   | 9921321 | 2 | 36 | A:0.388889             |          | G:0.611111     |          |
| chr28                   | 9921393 | 2 | 38 | A:1                    | T:0      |                |          |
| chr28                   | 9921431 | 2 | 40 | T:1                    | TA:0     |                |          |
| chr28                   | 9921727 | 2 | 40 | A:1                    | T:0      |                |          |
| chr28                   | 9921736 | 2 | 38 | T:0.184211             |          | TAAAG:0.815789 |          |
| chr28                   | 9921988 | 2 | 40 | G:0.35                 | A:0.65   |                |          |
| chr28                   | 9922247 | 3 | 40 | GAGAAAGAA:0.25         |          | G:0.75         | GAGAA:0  |
| chr28                   | 9922309 | 2 | 40 | GAGA:0.625             |          | G:0.375        |          |
| chr28                   | 9922312 | 2 | 38 | AAAAG:0.894737         |          | A:0.105263     |          |
| chr28                   | 9922350 | 2 | 40 | AAGAAAGAAAGAAAAG:0.625 |          | A:0.375        |          |

|                                                             |         |   |    |                     |                  |
|-------------------------------------------------------------|---------|---|----|---------------------|------------------|
| chr28                                                       | 9922389 | 3 | 40 | AAAAGAAAGAAAG:0.775 | A:0.15           |
| AAAAGAAAG:0.075                                             |         |   |    |                     |                  |
| chr28                                                       | 9922484 | 2 | 38 | A:0.394737          | AAACAAC:0.605263 |
| chr28                                                       | 9922491 | 2 | 38 | A:0.894737          | T:0.105263       |
| chr28                                                       | 9923102 | 2 | 36 | C:1                 | T:0              |
| chr28                                                       | 9923322 | 2 | 36 | A:0.333333          | G:0.666667       |
| chr28                                                       | 9923729 | 2 | 34 | G:1                 | GA:0             |
| chr28                                                       | 9924429 | 2 | 38 | T:0.578947          | C:0.421053       |
| chr28                                                       | 9924670 | 2 | 34 | G:0.352941          | GA:0.647059      |
| chr28                                                       | 9925035 | 2 | 40 | T:0.3               | C:0.7            |
| chr28                                                       | 9925087 | 2 | 40 | C:0.875             | T:0.125          |
| chr28                                                       | 9925180 | 2 | 40 | A:0.375             | T:0.625          |
| chr28                                                       | 9925490 | 2 | 38 | G:0.315789          | C:0.684211       |
| chr28                                                       | 9925725 | 2 | 36 | T:0.222222          | C:0.777778       |
| chr28                                                       | 9927365 | 2 | 40 | T:0.275             | C:0.725          |
| chr28                                                       | 9927462 | 2 | 40 | AAT:1               | A:0              |
| chr28                                                       | 9927599 | 2 | 36 | C:0.666667          | T:0.333333       |
| chr28                                                       | 9928055 | 2 | 40 | A:0.825             | T:0.175          |
| chr28                                                       | 9928142 | 2 | 38 | A:1                 | T:0              |
| chr28                                                       | 9928654 | 2 | 38 | C:0.0263158         | T:0.973684       |
| chr28                                                       | 9929062 | 2 | 34 | CCTCT:0.647059      | C:0.352941       |
| chr28                                                       | 9929534 | 2 | 36 | CAAAA:0.916667      | C:0.0833333      |
| chr28                                                       | 9929677 | 2 | 16 | T:0.875             | TA:0.125         |
| chr28                                                       | 9930040 | 2 | 36 | TA:0.666667         | T:0.333333       |
| chr28                                                       | 9930276 | 2 | 36 | TA:0.75             | T:0.25           |
| chr28                                                       | 9931128 | 2 | 22 | TA:0.636364         | T:0.363636       |
| chr28                                                       | 9932271 | 2 | 40 | C:0.575             | T:0.425          |
| chr28                                                       | 9932368 | 2 | 38 | T:0.894737          | C:0.105263       |
| chr28                                                       | 9932584 | 2 | 36 | T:0.5               | C:0.5            |
| chr28                                                       | 9932724 | 2 | 34 | C:0.294118          | G:0.705882       |
| chr28                                                       | 9932870 | 6 | 38 | AATAGATAG:0.342105  | A:               |
| 0.342105 AATAG:0.0263158 AATAGATAGATAG:0.236842             |         |   |    |                     |                  |
| AATAGATAGATAGATAG:0.0263158 AATAGATAGATAGATAGATAG:0.0263158 |         |   |    |                     |                  |
| chr28                                                       | 9934201 | 2 | 40 | G:1                 | A:0              |
| chr28                                                       | 9934316 | 2 | 38 | C:0.868421          | T:0.131579       |
| chr28                                                       | 9934493 | 2 | 40 | A:0.225             | G:0.775          |
| chr28                                                       | 9934961 | 2 | 34 | C:0.676471          | CA:0.323529      |
| chr28                                                       | 9935090 | 2 | 38 | AT:1                | A:0              |
| chr28                                                       | 9935179 | 2 | 36 | G:0.666667          | A:0.333333       |
| chr28                                                       | 9935476 | 2 | 36 | T:1                 | G:0              |
| chr28                                                       | 9935849 | 3 | 38 | T:0.684211          | TA:0.315789      |
| TAA:0                                                       |         |   |    |                     |                  |
| chr28                                                       | 9936028 | 2 | 40 | GA:0                | G:1              |
| chr28                                                       | 9936036 | 2 | 40 | G:0                 | GA:1             |
| chr28                                                       | 9936130 | 2 | 36 | G:0.305556          | A:0.694444       |
| chr28                                                       | 9938943 | 3 | 38 | C:0.684211          | CA:0.0789474     |
| CAA:0.236842                                                |         |   |    |                     |                  |
| chr28                                                       | 9939204 | 2 | 34 | AAC:0.794118        | A:0.205882       |
| chr28                                                       | 9939206 | 2 | 32 | C:0.90625           | A:0.09375        |
| chr28                                                       | 9940272 | 2 | 36 | A:0.805556          | G:0.194444       |
| chr28                                                       | 9940348 | 2 | 38 | TTTC:0.789474       | T:0.210526       |
| chr28                                                       | 9942369 | 2 | 40 | GGAGA:1             | G:0              |
| chr28                                                       | 9944305 | 2 | 32 | T:0.4375            | C:0.5625         |
| chr28                                                       | 9945252 | 2 | 36 | T:0.777778          | C:0.222222       |

|                               |         |   |    |                              |                 |
|-------------------------------|---------|---|----|------------------------------|-----------------|
| chr28                         | 9945832 | 2 | 36 | TA:0.666667                  | T:0.333333      |
| chr28                         | 9947583 | 2 | 40 | T:1 C:0                      |                 |
| chr28                         | 9947736 | 3 | 36 | A:0.805556                   | AG:0.194444     |
| AGG:0                         |         |   |    |                              |                 |
| chr28                         | 9947747 | 3 | 36 | A:0.666667                   | AG:0.333333     |
| G:0                           |         |   |    |                              |                 |
| chr28                         | 9947926 | 2 | 36 | C:1 A:0                      |                 |
| chr28                         | 9947989 | 2 | 36 | C:0.888889                   | CA:0.111111     |
| chr28                         | 9948544 | 2 | 38 | A:1 C:0                      |                 |
| chr28                         | 9949016 | 2 | 32 | ACAAT:0.6875                 | A:0.3125        |
| chr28                         | 9949084 | 2 | 34 | A:0.705882                   | AT:0.294118     |
| chr28                         | 9949465 | 2 | 32 | T:0.875 A:0.125              |                 |
| chr28                         | 9950701 | 2 | 32 | T:1 C:0                      |                 |
| chr28                         | 9951013 | 2 | 30 | A:0.4 G:0.6                  |                 |
| chr28                         | 9951541 | 2 | 30 | C:0.6 CCTCT:0.4              |                 |
| chr28                         | 9952690 | 2 | 40 | C:0.85 T:0.15                |                 |
| chr28                         | 9953010 | 2 | 38 | A:1 T:0                      |                 |
| chr28                         | 9953318 | 2 | 26 | CCT:0.653846                 | C:0.346154      |
| chr28                         | 9953671 | 2 | 40 | C:1 T:0                      |                 |
| chr28                         | 9953923 | 3 | 36 | G:0.75 GA:0.222222           | GAA:            |
| 0.0277778                     |         |   |    |                              |                 |
| chr28                         | 9954492 | 2 | 38 | G:0.342105                   | GA:0.657895     |
| chr28                         | 9954881 | 2 | 36 | T:0.388889                   | G:0.611111      |
| chr28                         | 9954891 | 2 | 34 | AT:1 A:0                     |                 |
| chr28                         | 9954901 | 2 | 34 | T:0.352941                   | A:0.647059      |
| chr28                         | 9955119 | 2 | 36 | T:0.361111                   | TA:0.638889     |
| chr28                         | 9955544 | 2 | 40 | G:0.875 T:0.125              |                 |
| chr28                         | 9955881 | 2 | 38 | C:0.342105                   | G:0.657895      |
| chr28                         | 9956105 | 2 | 38 | C:0.921053                   | T:0.0789474     |
| chr28                         | 9956137 | 3 | 36 | G:0.555556                   | GTCTC:0.111111  |
| GTCTCTC:0.333333              |         |   |    |                              |                 |
| chr28                         | 9956173 | 2 | 36 | TA:0.694444                  | T:0.305556      |
| chr28                         | 9956424 | 2 | 34 | A:0.676471                   | G:0.323529      |
| chr28                         | 9956653 | 2 | 32 | C:0.375 T:0.625              |                 |
| chr28                         | 9957148 | 2 | 38 | T:0.684211                   | C:0.315789      |
| chr28                         | 9957756 | 2 | 34 | T:0.323529                   | A:0.676471      |
| chr28                         | 9957779 | 2 | 38 | T:0.973684                   | TAAAA:0.0263158 |
| chr28                         | 9957785 | 2 | 38 | T:0.973684                   | TAA:0.0263158   |
| chr28                         | 9957787 | 2 | 38 | A:0.368421                   | AAT:0.631579    |
| chr28                         | 9957794 | 3 | 38 | TA:0.289474                  | AA:0.0789474    |
| T:0.631579                    |         |   |    |                              |                 |
| chr28                         | 9957796 | 2 | 32 | A:0.96875                    | AT:0.03125      |
| chr28                         | 9957802 | 2 | 38 | A:0.368421                   | T:0.631579      |
| chr28                         | 9957821 | 2 | 38 | T:0.368421                   | C:0.631579      |
| chr28                         | 9957952 | 5 | 36 | CCTCTCTCTCTCTCTCTCT:0.166667 |                 |
| C:0.666667                    |         |   |    |                              |                 |
| CCTCTCTCTCTCTCTCTCT:0.0277778 |         |   |    |                              |                 |
| CCTCTCTCTCTCTCTCTCT:0.111111  |         |   |    |                              |                 |
| chr28                         | 9958001 | 2 | 36 | CATAA:0.777778               | C:0.222222      |
| chr28                         | 9958025 | 3 | 38 | A:0.710526                   | C:0.0263158     |
| AATAC:0.263158                |         |   |    |                              |                 |
| chr28                         | 9958242 | 2 | 28 | CT:0.535714                  | C:0.464286      |
| chr28                         | 9958526 | 2 | 38 | A:0.263158                   | T:0.736842      |
| chr28                         | 9958909 | 2 | 40 | C:0.925 T:0.075              |                 |
| chr28                         | 9959119 | 2 | 32 | T:0.25 C:0.75                |                 |



|                                                                      |         |   |    |                           |                  |
|----------------------------------------------------------------------|---------|---|----|---------------------------|------------------|
| chr28                                                                | 9959432 | 2 | 34 | G:0.764706                | A:0.235294       |
| chr28                                                                | 9959710 | 2 | 38 | C:1 G:0                   |                  |
| chr28                                                                | 9959963 | 2 | 36 | T:0.805556                | C:0.194444       |
| chr28                                                                | 9960316 | 2 | 40 | TA:0.8 T:0.2              |                  |
| chr28                                                                | 9960317 | 2 | 40 | A:0.925 T:0.075           |                  |
| chr28                                                                | 9960471 | 2 | 32 | TG:1 T:0                  |                  |
| chr28                                                                | 9960605 | 3 | 34 | TA:0.5 T:0.382353         | TAA:             |
| 0.117647                                                             |         |   |    |                           |                  |
| chr28                                                                | 9960622 | 2 | 36 | T:0.777778                | TCTG:0.222222    |
| chr28                                                                | 9960700 | 2 | 34 | G:0.941176                | A:0.0588235      |
| chr28                                                                | 9960975 | 2 | 36 | A:1 T:0                   |                  |
| chr28                                                                | 9961089 | 2 | 36 | C:0.75 T:0.25             |                  |
| chr28                                                                | 9961105 | 2 | 38 | C:0.894737                | T:0.105263       |
| chr28                                                                | 9961338 | 2 | 40 | A:0.65 AG:0.35            |                  |
| chr28                                                                | 9961482 | 2 | 40 | C:0.4 CT:0.6              |                  |
| chr28                                                                | 9961588 | 2 | 40 | T:0.675 TC:0.325          |                  |
| chr28                                                                | 9961876 | 2 | 38 | A:0.736842                | G:0.263158       |
| chr28                                                                | 9962049 | 2 | 40 | CAT:0.85 C:0.15           |                  |
| chr28                                                                | 9962281 | 2 | 28 | CCT:0.928571              | C:0.0714286      |
| chr28                                                                | 9962470 | 2 | 34 | T:1 C:0                   |                  |
| chr28                                                                | 9962583 | 2 | 40 | A:1                       |                  |
| AAGACATCACCCAGTCTACGGCCATACCACCCTGAACGCGCCCGATCTCGTCTGATCTCGGAAGCTAA |         |   |    |                           |                  |
| GCAGGGTCGGGCCTGGTTAGTACTTGGATGGG:0                                   |         |   |    |                           |                  |
| chr28                                                                | 9962672 | 2 | 38 | T:0.789474                | C:0.210526       |
| chr28                                                                | 9963026 | 2 | 38 | C:0.868421                | T:0.131579       |
| chr28                                                                | 9963417 | 2 | 40 | C:0.725 T:0.275           |                  |
| chr28                                                                | 9963449 | 2 | 40 | G:1 A:0                   |                  |
| chr28                                                                | 9963862 | 2 | 36 | C:0.222222                | T:0.777778       |
| chr28                                                                | 9964118 | 2 | 38 | C:0.789474                | A:0.210526       |
| chr28                                                                | 9964363 | 2 | 36 | T:0.833333                | C:0.166667       |
| chr28                                                                | 9964449 | 2 | 40 | C:0.875 CCTCT:0.125       |                  |
| chr28                                                                | 9964485 | 4 | 34 | T:0.294118                | TA:0.558824      |
| TAA:0.147059 TAAA:0                                                  |         |   |    |                           |                  |
| chr28                                                                | 9964630 | 2 | 36 | C:0.833333                | CCTCT:0.166667   |
| chr28                                                                | 9964740 | 2 | 40 | GA:0.175 G:0.825          |                  |
| chr28                                                                | 9964838 | 2 | 40 | A:0.15 G:0.85             |                  |
| chr28                                                                | 9965642 | 2 | 38 | G:0.894737                | A:0.105263       |
| chr28                                                                | 9965676 | 2 | 36 | G:0.75 C:0.25             |                  |
| chr28                                                                | 9967175 | 2 | 38 | A:1 G:0                   |                  |
| chr28                                                                | 9968483 | 2 | 38 | A:0.368421                | G:0.631579       |
| chr28                                                                | 9969013 | 2 | 38 | T:0.605263                | C:0.394737       |
| chr28                                                                | 9969507 | 2 | 36 | AAAG:1 A:0                |                  |
| chr28                                                                | 9969512 | 2 | 36 | A:1 C:0                   |                  |
| chr28                                                                | 9969777 | 3 | 40 | AAC:0.625                 | A:0.025 AACACAC: |
| 0.35                                                                 |         |   |    |                           |                  |
| chr28                                                                | 9969871 | 2 | 38 | G:1 A:0                   |                  |
| chr28                                                                | 9969879 | 2 | 38 | T:0.263158                | C:0.736842       |
| chr28                                                                | 9970039 | 2 | 36 | CGGGAGCCCCGCGAT:0.0277778 |                  |
| C:0.972222                                                           |         |   |    |                           |                  |
| chr28                                                                | 9971287 | 2 | 24 | G:0.541667                | T:0.458333       |
| chr28                                                                | 9971366 | 2 | 28 | C:0.714286                | A:0.285714       |
| chr28                                                                | 9971397 | 2 | 32 | G:0.71875                 | T:0.28125        |
| chr28                                                                | 9971574 | 2 | 28 | C:0.785714                | A:0.214286       |
| chr28                                                                | 9971681 | 2 | 38 | G:0.736842                | C:0.263158       |

|                  |         |                |    |                |                |
|------------------|---------|----------------|----|----------------|----------------|
| chr28            | 9971687 | 2              | 36 | A:0.666667     | C:0.333333     |
| chr28            | 9972155 | 2              | 32 | C:1            | CTTT:0         |
| chr28            | 9972167 | 2              | 30 | T:0.766667     | TTA:0.233333   |
| chr28            | 9972180 | 2              | 32 | C:0.40625      | T:0.59375      |
| chr28            | 9972222 | 2              | 30 | A:1            | T:0            |
| chr28            | 9972623 | 2              | 36 | AT:0.916667    | A:0.0833333    |
| chr28            | 9972653 | 4              | 38 | GT:0.105263    | G:0.421053     |
| GTTT:0.263158    |         | GTTTT:0.210526 |    |                |                |
| chr28            | 9972690 | 3              | 36 | CAGAG:0.416667 | C:0.333333     |
| CAGAGAG:0.25     |         |                |    |                |                |
| chr28            | 9973458 | 2              | 38 | G:0.763158     | A:0.236842     |
| chr28            | 9973537 | 2              | 36 | A:0.5          | AAC:0.5        |
| chr28            | 9973915 | 2              | 40 | C:0.65         | CAA:0.35       |
| chr28            | 9974638 | 2              | 40 | T:0.3          | C:0.7          |
| chr28            | 9974833 | 2              | 38 | C:0.447368     | T:0.552632     |
| chr28            | 9974848 | 2              | 38 | C:1            | T:0            |
| chr28            | 9974904 | 2              | 38 | A:0.131579     | G:0.868421     |
| chr28            | 9974936 | 2              | 36 | C:0.333333     | T:0.666667     |
| chr28            | 9975592 | 3              | 36 | C:0.611111     | CACAG:0.111111 |
| CACACAG:0.277778 |         |                |    |                |                |
| chr28            | 9975627 | 2              | 32 | A:0.4375       | G:0.5625       |
| chr28            | 9975839 | 2              | 38 | T:0.684211     | C:0.315789     |
| chr28            | 9975887 | 2              | 40 | T:0.325        | C:0.675        |
| chr28            | 9975979 | 2              | 40 | A:0.425        | C:0.575        |
| chr28            | 9976067 | 2              | 40 | A:0.3          | T:0.7          |
| chr28            | 9976079 | 2              | 40 | C:0.3          | T:0.7          |
| chr28            | 9976406 | 2              | 38 | T:0.315789     | A:0.684211     |
| chr28            | 9976412 | 2              | 38 | T:0.315789     | C:0.684211     |
| chr28            | 9976549 | 2              | 32 | C:0.40625      | T:0.59375      |
| chr28            | 9976570 | 2              | 30 | GTC:0.466667   | G:0.533333     |
| chr28            | 9976621 | 2              | 38 | T:0.5          | G:0.5          |
| chr28            | 9976866 | 2              | 34 | T:0.411765     | TAG:0.588235   |
| chr28            | 9977173 | 2              | 30 | G:0.566667     | A:0.433333     |
| chr28            | 9977269 | 2              | 36 | G:0.333333     | A:0.666667     |
| chr28            | 9977368 | 2              | 38 | G:0.263158     | A:0.736842     |
| chr28            | 9977531 | 2              | 38 | C:0.394737     | CA:0.605263    |
| chr28            | 9977551 | 3              | 40 | C:0.625        | CA:0           |
| chr28            | 9977615 | 2              | 40 | T:0.35         | C:0.65         |
| chr28            | 9977652 | 2              | 40 | G:1            | A:0            |
| chr28            | 9977724 | 2              | 38 | G:0.473684     | A:0.526316     |
| chr28            | 9977937 | 2              | 36 | A:0.361111     | G:0.638889     |
| chr28            | 9978248 | 2              | 34 | A:0.441176     | G:0.558824     |
| chr28            | 9978328 | 2              | 38 | A:0.710526     | G:0.289474     |
| chr28            | 9978417 | 2              | 38 | T:0.394737     | C:0.605263     |
| chr28            | 9978479 | 2              | 32 | A:1            | G:0            |
| chr28            | 9978950 | 2              | 36 | T:0.444444     | C:0.555556     |
| chr28            | 9979983 | 2              | 32 | C:1            | T:0            |
| chr28            | 9980549 | 2              | 40 | C:0.775        | T:0.225        |
| chr28            | 9980829 | 2              | 36 | T:0.361111     | C:0.638889     |
| chr28            | 9980925 | 2              | 38 | C:1            | T:0            |
| chr28            | 9981357 | 2              | 34 | G:1            | A:0            |
| chr28            | 9981483 | 2              | 32 | G:0.65625      | A:0.34375      |
| chr28            | 9981866 | 2              | 38 | A:1            | ATCCCTGGG:0    |
| chr28            | 9981870 | 2              | 38 | C:1            | CGCAGCGGT:0    |

|              |         |   |    |               |         |                        |
|--------------|---------|---|----|---------------|---------|------------------------|
| chr28        | 9981975 | 2 | 40 | T:0.3         | C:0.7   |                        |
| chr28        | 9982005 | 2 | 38 | A:0.368421    |         | G:0.631579             |
| chr28        | 9982050 | 2 | 38 | C:0.973684    |         | T:0.0263158            |
| chr28        | 9982104 | 2 | 40 | C:0.5         | T:0.5   |                        |
| chr28        | 9982112 | 2 | 40 | G:0.5         | A:0.5   |                        |
| chr28        | 9982162 | 3 | 40 | CCTCTCT:0.275 |         | C:0.65 CCTCT:<br>0.075 |
| chr28        | 9982193 | 2 | 38 | C:0.368421    |         | G:0.631579             |
| chr28        | 9982831 | 2 | 36 | C:0.333333    |         | G:0.666667             |
| chr28        | 9982863 | 2 | 38 | C:0.394737    |         | T:0.605263             |
| chr28        | 9983073 | 2 | 40 | C:0.375       | T:0.625 |                        |
| chr28        | 9983260 | 2 | 36 | G:0.305556    |         | A:0.694444             |
| chr28        | 9983295 | 2 | 34 | C:0.705882    |         | A:0.294118             |
| chr28        | 9983396 | 2 | 38 | G:1           | A:0     |                        |
| chr28        | 9983522 | 2 | 40 | G:0.425       | A:0.575 |                        |
| chr28        | 9983533 | 2 | 40 | T:0.425       | C:0.575 |                        |
| chr28        | 9983570 | 2 | 38 | C:0.447368    |         | T:0.552632             |
| chr28        | 9984009 | 2 | 36 | T:0.388889    |         | C:0.611111             |
| chr28        | 9984025 | 2 | 38 | G:0.421053    |         | A:0.578947             |
| chr28        | 9984223 | 2 | 40 | C:1           | G:0     |                        |
| chr28        | 9984291 | 2 | 36 | C:0.333333    |         | G:0.666667             |
| chr28        | 9984452 | 2 | 38 | T:1           | C:0     |                        |
| chr28        | 9984534 | 2 | 38 | C:0.263158    |         | G:0.736842             |
| chr28        | 9984633 | 2 | 40 | G:1           | A:0     |                        |
| chr28        | 9984635 | 2 | 40 | G:0.4         | C:0.6   |                        |
| chr28        | 9984850 | 2 | 38 | C:1           | T:0     |                        |
| chr28        | 9984907 | 2 | 30 | T:0.8         | TA:0.2  |                        |
| chr28        | 9985389 | 2 | 32 | A:1           | G:0     |                        |
| chr28        | 9985655 | 2 | 34 | G:1           | A:0     |                        |
| chr28        | 9985722 | 2 | 36 | T:0.0277778   |         | C:0.972222             |
| chr28        | 9985736 | 2 | 34 | A:0.382353    |         | T:0.617647             |
| chr28        | 9985765 | 2 | 36 | T:1           | A:0     |                        |
| chr28        | 9985816 | 2 | 34 | T:1           | TA:0    |                        |
| chr28        | 9986285 | 2 | 40 | C:0.675       | T:0.325 |                        |
| chr28        | 9986551 | 2 | 40 | T:1           | C:0     |                        |
| chr28        | 9986841 | 2 | 36 | G:1           | T:0     |                        |
| chr28        | 9986915 | 2 | 38 | C:1           | G:0     |                        |
| chr28        | 9987186 | 2 | 36 | T:0.388889    |         | TAG:0.611111           |
| chr28        | 9987300 | 2 | 38 | A:1           | T:0     |                        |
| chr28        | 9987449 | 2 | 38 | C:1           | T:0     |                        |
| chr28        | 9987855 | 2 | 38 | C:1           | A:0     |                        |
| chr28        | 9987877 | 2 | 36 | T:0.444444    |         | TA:0.555556            |
| chr28        | 9987927 | 3 | 38 | AT:0.421053   |         | A:0.342105             |
| ATT:0.236842 |         |   |    |               |         |                        |
| chr28        | 9988108 | 2 | 40 | A:1           | T:0     |                        |
| chr28        | 9988315 | 2 | 40 | T:1           | C:0     |                        |
| chr28        | 9988511 | 2 | 18 | C:0.222222    |         | CA:0.777778            |
| chr28        | 9989242 | 2 | 30 | T:1           | A:0     |                        |
| chr28        | 9990006 | 2 | 38 | C:1           | A:0     |                        |
| chr28        | 9990178 | 2 | 38 | C:0.684211    |         | T:0.315789             |
| chr28        | 9990183 | 2 | 36 | C:0.333333    |         | T:0.666667             |
| chr28        | 9990416 | 2 | 38 | A:1           | G:0     |                        |
| chr28        | 9990557 | 2 | 40 | T:1           | A:0     |                        |
| chr28        | 9990932 | 2 | 38 | T:1           | C:0     |                        |

|                            |          |   |    |                                       |             |          |
|----------------------------|----------|---|----|---------------------------------------|-------------|----------|
| chr28                      | 9990959  | 2 | 36 | T:1                                   | C:0         |          |
| chr28                      | 9990970  | 2 | 36 | C:1                                   | T:0         |          |
| chr28                      | 9991065  | 2 | 38 | C:0.631579                            | T:0.368421  |          |
| chr28                      | 9991102  | 2 | 36 | T:0.694444                            | G:0.305556  |          |
| chr28                      | 9991563  | 2 | 36 | A:1                                   | T:0         |          |
| chr28                      | 9991672  | 2 | 34 | T:0.676471                            | C:0.323529  |          |
| chr28                      | 9991885  | 2 | 34 | C:1                                   | T:0         |          |
| chr28                      | 9992325  | 2 | 30 | C:0.366667                            | T:0.633333  |          |
| chr28                      | 9992501  | 2 | 22 | G:0.863636                            | A:0.136364  |          |
| chr28                      | 9992546  | 2 | 24 | AGGAGG:0.208333                       | A:0.791667  |          |
| chr28                      | 9992570  | 2 | 24 | G:0.208333                            | A:0.791667  |          |
| chr28                      | 9992722  | 2 | 34 | G:0.323529                            | A:0.676471  |          |
| chr28                      | 9992731  | 2 | 34 | C:0.323529                            | A:0.676471  |          |
| chr28                      | 9992882  | 2 | 36 | A:1                                   | G:0         |          |
| chr28                      | 9992924  | 2 | 38 | G:0.368421                            | T:0.631579  |          |
| chr28                      | 9992928  | 2 | 38 | A:0.368421                            | G:0.631579  |          |
| chr28                      | 9992963  | 2 | 38 | A:0.368421                            | G:0.631579  |          |
| chr28                      | 9993055  | 2 | 34 | G:0.5                                 | A:0.5       |          |
| chr28                      | 9993060  | 2 | 34 | C:0.5                                 | T:0.5       |          |
| chr28                      | 9993145  | 2 | 36 | C:0.277778                            | T:0.722222  |          |
| chr28                      | 9993279  | 2 | 34 | G:0.294118                            | A:0.705882  |          |
| chr28                      | 9993341  | 2 | 36 | C:0.333333                            | T:0.666667  |          |
| chr28                      | 9993410  | 2 | 36 | T:0.277778                            | C:0.722222  |          |
| chr28                      | 9993413  | 2 | 36 | T:0.277778                            | TG:0.722222 |          |
| chr28                      | 9993962  | 2 | 40 | C:0.425                               | T:0.575     |          |
| chr28                      | 9994647  | 2 | 36 | C:0.833333                            | A:0.166667  |          |
| chr28                      | 9994812  | 2 | 32 | T:0.40625                             | C:0.59375   |          |
| chr28                      | 9995928  | 2 | 36 | G:0.361111                            | T:0.638889  |          |
| chr28                      | 9996072  | 2 | 36 | G:0.694444                            | A:0.305556  |          |
| chr28                      | 9996290  | 2 | 36 | G:0.694444                            | A:0.305556  |          |
| chr28                      | 9996574  | 2 | 40 | AAGC:0.75                             | A:0.25      |          |
| chr28                      | 9996642  | 2 | 36 | T:0.388889                            | C:0.611111  |          |
| chr28                      | 9997195  | 2 | 34 | G:0.441176                            | T:0.558824  |          |
| chr28                      | 9997477  | 2 | 34 | C:0.764706                            | G:0.235294  |          |
| chr28                      | 9997600  | 4 | 40 | GATTTATTTATTTATTT:0.2                 | G:0.45      |          |
| GATTTATTTATTTATTTATTT:0.15 |          |   |    | GATTTATTTATTTATTTATTTATTTATTTATTT:0.2 |             |          |
| chr28                      | 9997720  | 2 | 34 | C:0.647059                            | T:0.352941  |          |
| chr28                      | 9997873  | 4 | 40 | T:0.55                                | TCACA:0.325 | TCACACA: |
| 0.125 TCACACACA:0          |          |   |    |                                       |             |          |
| chr28                      | 9997890  | 2 | 40 | C:1                                   | G:0         |          |
| chr28                      | 9998077  | 2 | 40 | C:0.725                               | T:0.275     |          |
| chr28                      | 9998409  | 2 | 36 | T:0.722222                            | C:0.277778  |          |
| chr28                      | 9998552  | 2 | 38 | A:0.394737                            | G:0.605263  |          |
| chr28                      | 9999121  | 2 | 36 | C:0.333333                            | T:0.666667  |          |
| chr28                      | 10000713 | 2 | 36 | G:0.888889                            | A:0.111111  |          |
| chr28                      | 10001026 | 2 | 32 | TA:0.5                                | T:0.5       |          |
| chr28                      | 10002489 | 2 | 38 | C:0.447368                            | T:0.552632  |          |
| chr28                      | 10002497 | 2 | 40 | GCTCT:0.725                           | G:0.275     |          |
| chr28                      | 10004928 | 2 | 38 | GA:0.394737                           | G:0.605263  |          |
| chr28                      | 10004934 | 2 | 38 | A:0.394737                            | G:0.605263  |          |
| chr28                      | 10004977 | 2 | 34 | T:0.823529                            | C:0.176471  |          |
| chr28                      | 10005188 | 2 | 36 | C:0.305556                            | A:0.694444  |          |
| chr28                      | 10005207 | 2 | 38 | A:0.315789                            | G:0.684211  |          |

|                                                                    |          |   |    |                            |                 |
|--------------------------------------------------------------------|----------|---|----|----------------------------|-----------------|
| chr28                                                              | 10005272 | 2 | 34 | A:0.352941                 | G:0.647059      |
| chr28                                                              | 10005547 | 2 | 38 | A:0.315789                 | T:0.684211      |
| chr28                                                              | 10005764 | 2 | 38 | A:0.763158                 | G:0.236842      |
| chr28                                                              | 10006211 | 2 | 38 | C:0.421053                 | T:0.578947      |
| chr28                                                              | 10006365 | 2 | 38 | T:0.368421                 | C:0.631579      |
| chr28                                                              | 10006642 | 2 | 34 | C:0.294118                 | T:0.705882      |
| chr28                                                              | 10006683 | 2 | 34 | G:0.705882                 | A:0.294118      |
| chr28                                                              | 10006760 | 2 | 36 | T:0.388889                 | TAGCCA:0.611111 |
| chr28                                                              | 10006950 | 2 | 36 | G:0.388889                 | A:0.611111      |
| chr28                                                              | 10007006 | 2 | 32 | G:0.40625                  | T:0.59375       |
| chr28                                                              | 10007231 | 2 | 34 | C:1                        | T:0             |
| chr28                                                              | 10007530 | 2 | 32 | G:0.375                    | A:0.625         |
| chr28                                                              | 10007900 | 2 | 36 | G:0.305556                 | A:0.694444      |
| chr28                                                              | 10008098 | 2 | 34 | G:0.882353                 | A:0.117647      |
| chr28                                                              | 10008446 | 2 | 36 | C:0.833333                 | G:0.166667      |
| chr28                                                              | 10009248 | 2 | 38 | A:0.447368                 | C:0.552632      |
| chr28                                                              | 10009355 | 2 | 38 | A:0.315789                 | C:0.684211      |
| chr28                                                              | 10009415 | 2 | 34 | C:0.411765                 | T:0.588235      |
| chr28                                                              | 10009645 | 2 | 38 | G:0.394737                 | A:0.605263      |
| chr28                                                              | 10009655 | 2 | 38 | T:0.394737                 | C:0.605263      |
| chr28                                                              | 10010658 | 2 | 38 | A:0.394737                 | G:0.605263      |
| chr28                                                              | 10010680 | 2 | 40 | G:0.425                    | T:0.575         |
| chr28                                                              | 10010872 | 2 | 34 | C:0.352941                 | T:0.647059      |
| chr28                                                              | 10011312 | 2 | 36 | G:0.305556                 | C:0.694444      |
| chr28                                                              | 10011360 | 2 | 36 | T:1                        | TCATC:0         |
| chr28                                                              | 10012507 | 2 | 34 | T:1                        | C:0             |
| chr28                                                              | 10012544 | 2 | 36 | G:0.666667                 | A:0.333333      |
| chr28                                                              | 10013329 | 2 | 38 | G:0.763158                 | T:0.236842      |
| chr28                                                              | 10013461 | 2 | 40 | C:0.375                    | G:0.625         |
| chr28                                                              | 10015175 | 2 | 38 | AT:0.394737                | A:0.605263      |
| chr28                                                              | 10015379 | 2 | 34 | CT:0.617647                | C:0.382353      |
| chr28                                                              | 10015437 | 2 | 34 | G:0.676471                 | A:0.323529      |
| chr28                                                              | 10015601 | 2 | 36 | C:0.916667                 | CT:0.0833333    |
| chr28                                                              | 10015852 | 2 | 36 | G:0.527778                 | C:0.472222      |
| chr28                                                              | 10015955 | 2 | 38 | G:0.736842                 | A:0.263158      |
| chr28                                                              | 10015988 | 2 | 36 | G:0.472222                 | A:0.527778      |
| chr28                                                              | 10016418 | 2 | 40 | A:0.375                    | G:0.625         |
| chr28                                                              | 10016464 | 2 | 38 | ACT:0.368421               | A:0.631579      |
| chr28                                                              | 10016606 | 2 | 38 | G:0.973684                 | T:0.0263158     |
| chr28                                                              | 10016758 | 2 | 40 | A:0.675                    | G:0.325         |
| chr28                                                              | 10016842 | 2 | 40 | T:0.75                     | C:0.25          |
| chr28                                                              | 10017100 | 2 | 36 | A:0.666667                 | G:0.333333      |
| chr28                                                              | 10018096 | 2 | 34 | A:1                        | G:0             |
| chr28                                                              | 10018353 | 2 | 36 | G:0.888889                 | T:0.111111      |
| chr28                                                              | 10020076 | 2 | 36 | A:0.388889                 | C:0.611111      |
| chr28                                                              | 10020334 | 6 | 40 | ATTATTTATTTATTTATTTATT:0.3 |                 |
| A:0.425 ATTATTTATTTATTTATTTATTTATT:0.075                           |          |   |    |                            |                 |
| ATATTTATTTATTTATTTATTTATTTATT:0.2 ATTATTTATTTATTTATTTATTTATTTATT:0 |          |   |    |                            |                 |
| ATATTTATTTATTTATTTATTTATTTATT:0                                    |          |   |    |                            |                 |
| chr28                                                              | 10020378 | 2 | 40 | T:0.575                    | C:0.425         |
| chr28                                                              | 10020673 | 2 | 40 | T:0.325                    | G:0.675         |
| chr28                                                              | 10020828 | 2 | 36 | T:0.305556                 | C:0.694444      |
| chr28                                                              | 10021397 | 2 | 40 | C:0.65                     | T:0.35          |
| chr28                                                              | 10022282 | 2 | 32 | A:0.46875                  | G:0.53125       |

|            |          |   |    |                  |              |
|------------|----------|---|----|------------------|--------------|
| chr28      | 10023320 | 2 | 38 | G:0.473684       | A:0.526316   |
| chr28      | 10024839 | 2 | 36 | T:0.333333       | C:0.666667   |
| chr28      | 10024912 | 2 | 40 | C:0.4            | T:0.6        |
| chr28      | 10025008 | 2 | 32 | C:1              | T:0          |
| chr28      | 10025114 | 2 | 38 | A:0.368421       | G:0.631579   |
| chr28      | 10025601 | 2 | 34 | T:0.323529       | C:0.676471   |
| chr28      | 10026279 | 2 | 40 | G:0.85           | A:0.15       |
| chr28      | 10026946 | 2 | 38 | G:0.447368       | C:0.552632   |
| chr28      | 10027645 | 2 | 36 | C:0.972222       | T:0.0277778  |
| chr28      | 10027876 | 2 | 36 | T:0.333333       | C:0.666667   |
| chr28      | 10028796 | 2 | 38 | CCTCCA:0.368421  | C:0.631579   |
| chr28      | 10028803 | 2 | 38 | T:0.368421       | TA:0.631579  |
| chr28      | 10029083 | 2 | 36 | G:0.666667       | A:0.333333   |
| chr28      | 10029354 | 2 | 36 | G:0.75           | A:0.25       |
| chr28      | 10029920 | 2 | 40 | G:0.725          | A:0.275      |
| chr28      | 10029933 | 2 | 40 | GGA:0.975        | G:0.025      |
| chr28      | 10030068 | 2 | 34 | G:0.411765       | A:0.588235   |
| chr28      | 10030773 | 2 | 30 | T:0.333333       | C:0.666667   |
| chr28      | 10030790 | 2 | 26 | C:0.884615       | CCT:0.115385 |
| chr28      | 10030838 | 2 | 34 | T:0.735294       | TAA:0.264706 |
| chr28      | 10030894 | 2 | 32 | T:0.75           | A:0.25       |
| chr28      | 10031113 | 2 | 36 | C:0.611111       | T:0.388889   |
| chr28      | 10031128 | 2 | 34 | G:1              | A:0          |
| chr28      | 10031274 | 2 | 30 | G:0.4            | A:0.6        |
| chr28      | 10031469 | 2 | 36 | CATT:1           | C:0          |
| chr28      | 10031581 | 2 | 36 | CA:0.694444      | C:0.305556   |
| chr28      | 10032164 | 2 | 40 | C:0.725          | CA:0.275     |
| chr28      | 10032818 | 2 | 38 | C:0.394737       | T:0.605263   |
| chr28      | 10032927 | 2 | 34 | C:1              | A:0          |
| chr28      | 10033520 | 2 | 34 | C:0.764706       | T:0.235294   |
| chr28      | 10034022 | 2 | 34 | A:0.617647       | T:0.382353   |
| chr28      | 10034024 | 2 | 34 | A:0.323529       | G:0.676471   |
| chr28      | 10034333 | 2 | 36 | G:1              | A:0          |
| chr28      | 10034440 | 2 | 36 | CCT:0.888889     | C:0.111111   |
| chr28      | 10034758 | 2 | 34 | A:0.441176       | T:0.558824   |
| chr28      | 10035134 | 2 | 38 | CTCTT:1          | C:0          |
| chr28      | 10035171 | 2 | 36 | A:1              | G:0          |
| chr28      | 10035173 | 2 | 36 | TA:1             | T:0          |
| chr28      | 10035182 | 2 | 36 | A:0.638889       | T:0.361111   |
| chr28      | 10035532 | 2 | 32 | G:0.71875        | A:0.28125    |
| chr28      | 10035735 | 2 | 32 | G:0.6875         | A:0.3125     |
| chr28      | 10035823 | 2 | 38 | AAAAAAT:0.289474 | A:0.710526   |
| chr28      | 10036775 | 2 | 38 | T:0.973684       | C:0.0263158  |
| chr28      | 10037636 | 2 | 40 | GC:0.9           | G:0.1        |
| chr28      | 10037685 | 2 | 38 | T:0.447368       | C:0.552632   |
| chr28      | 10039396 | 3 | 32 | TTCTCTC:0.65625  | T:0.03125    |
| TTCTCTCTC: | 0.3125   |   |    |                  |              |
| chr28      | 10040013 | 2 | 36 | C:1              | G:0          |
| chr28      | 10040175 | 2 | 36 | A:0.361111       | T:0.638889   |
| chr28      | 10040882 | 2 | 38 | A:1              | C:0          |
| chr28      | 10041010 | 2 | 36 | A:0              | G:1          |
| chr28      | 10041310 | 2 | 40 | G:1              | A:0          |
| chr28      | 10042479 | 2 | 40 | G:1              | A:0          |
| chr28      | 10042569 | 2 | 40 | G:1              | A:0          |

|              |          |   |    |               |              |  |
|--------------|----------|---|----|---------------|--------------|--|
| chr28        | 10042632 | 2 | 38 | C:1           | T:0          |  |
| chr28        | 10042747 | 2 | 40 | C:0.4         | G:0.6        |  |
| chr28        | 10043976 | 2 | 36 | A:0.277778    | G:0.722222   |  |
| chr28        | 10044855 | 2 | 40 | A:0.675       | T:0.325      |  |
| chr28        | 10044930 | 2 | 34 | A:0.764706    | T:0.235294   |  |
| chr28        | 10044931 | 2 | 34 | A:0.764706    | T:0.235294   |  |
| chr28        | 10044951 | 2 | 36 | C:0.666667    | T:0.333333   |  |
| chr28        | 10045052 | 2 | 28 | T:0.607143    | G:0.392857   |  |
| chr28        | 10045135 | 2 | 34 | T:0.705882    | A:0.294118   |  |
| chr28        | 10045151 | 2 | 34 | C:0.705882    | T:0.294118   |  |
| chr28        | 10045236 | 2 | 36 | GTAA:0.694444 | G:0.305556   |  |
| chr28        | 10045498 | 2 | 32 | C:0.59375     | T:0.40625    |  |
| chr28        | 10045566 | 2 | 38 | T:0.631579    | A:0.368421   |  |
| chr28        | 10045661 | 2 | 36 | T:0.583333    | C:0.416667   |  |
| chr28        | 10045823 | 2 | 38 | A:0.710526    | G:0.289474   |  |
| chr28        | 10046105 | 2 | 36 | C:0.972222    | T:0.0277778  |  |
| chr28        | 10046511 | 2 | 32 | C:0.5625      | CAA:0.4375   |  |
| chr28        | 10046531 | 2 | 28 | A:0.571429    | G:0.428571   |  |
| chr28        | 10046533 | 2 | 30 | AC:0.333333   | A:0.666667   |  |
| chr28        | 10046770 | 2 | 40 | C:0.7         | T:0.3        |  |
| chr28        | 10046871 | 2 | 38 | T:0.605263    | C:0.394737   |  |
| chr28        | 10046949 | 2 | 36 | C:0.555556    | T:0.444444   |  |
| chr28        | 10047007 | 2 | 36 | C:0.583333    | T:0.416667   |  |
| chr28        | 10047016 | 2 | 36 | GAA:0.611111  | G:0.388889   |  |
| chr28        | 10047087 | 2 | 36 | T:0.583333    | TG:0.416667  |  |
| chr28        | 10047088 | 2 | 36 | G:0.888889    | GT:0.111111  |  |
| chr28        | 10047278 | 2 | 40 | T:0.4         | C:0.6        |  |
| chr28        | 10047881 | 2 | 38 | G:1           | A:0          |  |
| chr28        | 10049508 | 2 | 36 | G:0.638889    | T:0.361111   |  |
| chr28        | 10049599 | 2 | 26 | CTT:0.807692  | C:0.192308   |  |
| chr28        | 10050396 | 2 | 38 | T:0.631579    | C:0.368421   |  |
| chr28        | 10051303 | 2 | 38 | G:1           | A:0          |  |
| chr28        | 10052597 | 2 | 34 | G:0.735294    | T:0.264706   |  |
| chr28        | 10052665 | 2 | 36 | T:0.833333    | G:0.166667   |  |
| chr28        | 10054158 | 2 | 28 | T:0.821429    | TA:0.178571  |  |
| chr28        | 10054168 | 2 | 28 | C:0.821429    | A:0.178571   |  |
| chr28        | 10054326 | 2 | 34 | A:0.558824    | T:0.441176   |  |
| chr28        | 10054423 | 2 | 36 | C:0.777778    | T:0.222222   |  |
| chr28        | 10054475 | 2 | 36 | A:0.777778    | C:0.222222   |  |
| chr28        | 10055778 | 2 | 34 | A:0.558824    | G:0.441176   |  |
| chr28        | 10057013 | 2 | 38 | G:1           | A:0          |  |
| chr28        | 10057327 | 2 | 36 | C:0.222222    | CTG:0.777778 |  |
| chr28        | 10057799 | 2 | 36 | T:0.583333    | G:0.416667   |  |
| chr28        | 10058016 | 2 | 32 | T:0.46875     | C:0.53125    |  |
| chr28        | 10058393 | 2 | 32 | G:0.6875      | A:0.3125     |  |
| chr28        | 10058485 | 2 | 40 | A:0.5         | T:0.5        |  |
| chr28        | 10059372 | 3 | 34 | C:0.205882    | CA:0.382353  |  |
| CAA:0.411765 |          |   |    |               |              |  |
| chr28        | 10060023 | 2 | 36 | G:0.583333    | T:0.416667   |  |
| chr28        | 10060123 | 2 | 32 | T:0.46875     | C:0.53125    |  |
| chr28        | 10060126 | 2 | 30 | AT:0.766667   | A:0.233333   |  |
| chr28        | 10060315 | 2 | 32 | AG:0.6875     | A:0.3125     |  |
| chr28        | 10060710 | 2 | 40 | A:0.2         | G:0.8        |  |
| chr28        | 10061091 | 2 | 36 | G:0.444444    | A:0.555556   |  |

|                |          |   |    |                       |                  |
|----------------|----------|---|----|-----------------------|------------------|
| chr28          | 10061284 | 3 | 32 | TA:0.65625            | T:0.34375        |
| TAAA:0         |          |   |    |                       |                  |
| chr28          | 10061832 | 2 | 40 | T:0.7                 | TA:0.3           |
| chr28          | 10061836 | 2 | 38 | AAATTAATT:0.657895    | A:               |
| 0.342105       |          |   |    |                       |                  |
| chr28          | 10061840 | 2 | 40 | T:0.925               | A:0.075          |
| chr28          | 10061883 | 2 | 38 | C:0.631579            | T:0.368421       |
| chr28          | 10062552 | 2 | 32 | T:0.625               | C:0.375          |
| chr28          | 10062726 | 2 | 36 | GT:0.527778           | G:0.472222       |
| chr28          | 10062863 | 2 | 40 | T:0                   | C:1              |
| chr28          | 10063276 | 2 | 38 | A:0.631579            | AAT:0.368421     |
| chr28          | 10063583 | 2 | 40 | T:0.8                 | C:0.2            |
| chr28          | 10064160 | 2 | 40 | GT:0.6                | G:0.4            |
| chr28          | 10064204 | 2 | 36 | C:0.527778            | CAGAGAG:0.472222 |
| chr28          | 10064491 | 2 | 36 | A:0.527778            | G:0.472222       |
| chr28          | 10064587 | 2 | 40 | T:0.65                | TA:0.35          |
| chr28          | 10064593 | 2 | 40 | AT:0.525              | A:0.475          |
| chr28          | 10064594 | 2 | 40 | T:0.65                | A:0.35           |
| chr28          | 10065475 | 2 | 34 | C:0.382353            | A:0.617647       |
| chr28          | 10065578 | 2 | 34 | A:0.529412            | G:0.470588       |
| chr28          | 10065761 | 2 | 34 | G:1                   | A:0              |
| chr28          | 10065988 | 2 | 30 | C:0.666667            | T:0.333333       |
| chr28          | 10066201 | 2 | 28 | TA:0.607143           | T:0.392857       |
| chr28          | 10066680 | 2 | 38 | GT:0.710526           | G:0.289474       |
| chr28          | 10066743 | 2 | 34 | A:0.5                 | G:0.5            |
| chr28          | 10066979 | 2 | 40 | C:0.65                | T:0.35           |
| chr28          | 10067114 | 2 | 34 | C:0.352941            | T:0.647059       |
| chr28          | 10067307 | 2 | 38 | G:1                   | A:0              |
| chr28          | 10067941 | 2 | 34 | T:0.617647            | G:0.382353       |
| chr28          | 10067961 | 2 | 34 | T:0.617647            | A:0.382353       |
| chr28          | 10068042 | 2 | 38 | A:0.394737            | G:0.605263       |
| chr28          | 10068636 | 2 | 34 | T:0.117647            | C:0.882353       |
| chr28          | 10069175 | 2 | 34 | G:0.764706            | GA:0.235294      |
| chr28          | 10069892 | 2 | 34 | T:0.588235            | C:0.411765       |
| chr28          | 10070151 | 2 | 36 | C:1                   | T:0              |
| chr28          | 10070483 | 3 | 38 | CAAAA:0.815789        | C:0.0263158      |
| CAAAA:0.157895 |          |   |    |                       |                  |
| chr28          | 10070487 | 2 | 38 | A:0.657895            | C:0.342105       |
| chr28          | 10070720 | 2 | 36 | G:0.527778            | GT:0.472222      |
| chr28          | 10070728 | 2 | 36 | C:0.527778            | CT:0.472222      |
| chr28          | 10070746 | 2 | 36 | A:0.972222            | T:0.0277778      |
| chr28          | 10070777 | 2 | 38 | C:0.736842            | CAG:0.263158     |
| chr28          | 10070843 | 2 | 38 | G:0.342105            | A:0.657895       |
| chr28          | 10070878 | 2 | 38 | GGCTAAAGCGGC:0.605263 | G:               |
| 0.394737       |          |   |    |                       |                  |
| chr28          | 10070947 | 2 | 34 | G:0.588235            | A:0.411765       |
| chr28          | 10071041 | 2 | 34 | G:0.235294            | A:0.764706       |
| chr28          | 10071202 | 2 | 36 | G:0.722222            | A:0.277778       |
| chr28          | 10071317 | 2 | 38 | GA:0.684211           | G:0.315789       |
| chr28          | 10071810 | 2 | 38 | A:0.552632            | T:0.447368       |
| chr28          | 10072480 | 2 | 40 | G:0.65                | A:0.35           |
| chr28          | 10072523 | 2 | 38 | AT:0.605263           | A:0.394737       |
| chr28          | 10072534 | 2 | 38 | AT:0.973684           | A:0.0263158      |
| chr28          | 10072535 | 2 | 38 | T:0.605263            | A:0.394737       |



|                        |                    |   |    |                            |                 |
|------------------------|--------------------|---|----|----------------------------|-----------------|
| chr28                  | 10072625           | 2 | 38 | C:0.631579                 | G:0.368421      |
| chr28                  | 10072630           | 2 | 38 | C:0.631579                 | T:0.368421      |
| chr28                  | 10072761           | 2 | 36 | A:0.611111                 | C:0.388889      |
| chr28                  | 10072909           | 2 | 40 | A:0.975                    | ATGGG:0.025     |
| chr28                  | 10072913           | 3 | 40 | GTGGA:0.65                 | G:0.3           |
| GTGGATGGATGGA:0.05     |                    |   |    |                            |                 |
| chr28                  | 10072942           | 3 | 40 | T:0.575                    | TGGAAGGAA:0.075 |
| TGGATGGATGGAAGGAA:0.35 |                    |   |    |                            |                 |
| chr28                  | 10072989           | 2 | 40 | C:0.675                    | T:0.325         |
| chr28                  | 10073256           | 2 | 38 | C:0.631579                 | A:0.368421      |
| chr28                  | 10073257           | 2 | 38 | T:0.631579                 | TA:0.368421     |
| chr28                  | 10073634           | 2 | 24 | G:0.666667                 | A:0.333333      |
| chr28                  | 10073742           | 2 | 32 | G:0.625                    | C:0.375         |
| chr28                  | 10074158           | 2 | 40 | C:0.6                      | G:0.4           |
| chr28                  | 10074162           | 2 | 40 | G:0.975                    | A:0.025         |
| chr28                  | 10074844           | 2 | 38 | T:0.789474                 | C:0.210526      |
| chr28                  | 10075230           | 2 | 32 | C:0.65625                  | T:0.34375       |
| chr28                  | 10075314           | 3 | 32 | CTT:0.3125                 | C:0.15625       |
| CT:0.53125             |                    |   |    |                            |                 |
| chr28                  | 10075364           | 2 | 26 | G:0.615385                 | GT:0.384615     |
| chr28                  | 10075629           | 2 | 32 | C:0.65625                  | A:0.34375       |
| chr28                  | 10075750           | 2 | 34 | G:0.676471                 | A:0.323529      |
| chr28                  | 10076043           | 2 | 40 | C:0.575                    | T:0.425         |
| chr28                  | 10076045           | 2 | 40 | T:0.575                    | A:0.425         |
| chr28                  | 10076129           | 2 | 40 | T:0.975                    | C:0.025         |
| chr28                  | 10076485           | 2 | 38 | T:0.947368                 | C:0.0526316     |
| chr28                  | 10076686           | 2 | 40 | G:0.75                     | A:0.25          |
| chr28                  | 10076703           | 2 | 40 | G:0.475                    | A:0.525         |
| chr28                  | 10076850           | 2 | 36 | C:0.638889                 | T:0.361111      |
| chr28                  | 10076853           | 2 | 36 | T:0.638889                 | C:0.361111      |
| chr28                  | 10076907           | 2 | 38 | C:0.605263                 | T:0.394737      |
| chr28                  | 10077169           | 2 | 38 | C:0.631579                 | T:0.368421      |
| chr28                  | 10077236           | 2 | 36 | A:0.944444                 | AT:0.0555556    |
| chr28                  | 10077237           | 2 | 36 | T:0.666667                 | TA:0.333333     |
| chr28                  | 10077324           | 2 | 34 | TG:0.617647                | T:0.382353      |
| chr28                  | 10078138           | 2 | 32 | C:0.625                    | T:0.375         |
| chr28                  | 10078199           | 2 | 26 | G:0.769231                 | A:0.230769      |
| chr28                  | 10078207           | 3 | 34 | TAAAAATAAATAAATA:0.823529  |                 |
| T:0                    | TAATAAATA:0.176471 |   |    |                            |                 |
| chr28                  | 10078210           | 5 | 34 | AAAATAAATAAATAAAT:0.647059 |                 |
| A:0.176471             | AAAATAAAT:0        |   |    | AAAATAAATAAAT:0.176471     |                 |
| TAAATAAATAAATAAAT:0    |                    |   |    |                            |                 |
| chr28                  | 10078261           | 2 | 36 | AT:0.972222                | A:0.0277778     |
| chr28                  | 10078263           | 2 | 36 | AAAT:0.972222              | A:0.0277778     |
| chr28                  | 10078526           | 2 | 34 | C:1                        | T:0             |
| chr28                  | 10079795           | 2 | 38 | T:0.605263                 | C:0.394737      |
| chr28                  | 10080015           | 2 | 38 | CTG:0.973684               | C:0.0263158     |
| chr28                  | 10080029           | 2 | 38 | A:0.578947                 | G:0.421053      |
| chr28                  | 10080379           | 2 | 38 | TA:0.631579                | T:0.368421      |
| chr28                  | 10080459           | 2 | 34 | CCGA:0.647059              | C:0.352941      |
| chr28                  | 10080475           | 2 | 32 | C:0.71875                  | T:0.28125       |
| chr28                  | 10080691           | 2 | 34 | C:1                        | T:0             |
| chr28                  | 10080746           | 2 | 36 | G:0.666667                 | A:0.333333      |
| chr28                  | 10080917           | 3 | 34 | GCA:0.705882               | G:0.0294118     |

GCACA:0.264706

|       |                             |    |                                    |                   |
|-------|-----------------------------|----|------------------------------------|-------------------|
| chr28 | 10081526 2                  | 38 | G:0.157895                         | A:0.842105        |
| chr28 | 10081739 2                  | 36 | C:0.111111                         | CTTCTGAA:0.888889 |
| chr28 | 10081788 2                  | 36 | A:0.166667                         | G:0.833333        |
| chr28 | 10082157 2                  | 36 | CAGAGAGAGAG:0.25                   | C:0.75            |
| chr28 | 10082780 3                  | 36 | CAAATAAATAAATAAATAAATAAAT:0.194444 |                   |
|       | C:0.416667                  |    | CAAATAAAT:0.388889                 |                   |
| chr28 | 10082898 2                  | 22 | A:0.272727                         | AGGAG:0.727273    |
| chr28 | 10084653 2                  | 32 | C:1 A:0                            |                   |
| chr28 | 10084683 2                  | 40 | C:0.225 G:0.775                    |                   |
| chr28 | 10084892 2                  | 36 | G:0.194444                         | T:0.805556        |
| chr28 | 10085050 2                  | 40 | T:0.275 C:0.725                    |                   |
| chr28 | 10085104 2                  | 36 | G:0.222222                         | A:0.777778        |
| chr28 | 10085310 2                  | 28 | CT:0.607143                        | C:0.392857        |
| chr28 | 10085343 2                  | 34 | C:0.470588                         | CT:0.529412       |
| chr28 | 10086152 2                  | 40 | T:0.25 C:0.75                      |                   |
| chr28 | 10086243 2                  | 32 | C:0.28125                          | T:0.71875         |
| chr28 | 10086541 2                  | 34 | C:1 A:0                            |                   |
| chr28 | 10086599 2                  | 36 | C:0.444444                         | CCT:0.555556      |
| chr28 | 10086657 2                  | 38 | T:0.315789                         | TA:0.684211       |
| chr28 | 10086958 2                  | 40 | C:0.225 G:0.775                    |                   |
| chr28 | 10087380 2                  | 32 | CTT:0.71875                        | C:0.28125         |
| chr28 | 10087430 2                  | 36 | C:0.972222                         | CAG:0.0277778     |
| chr28 | 10089009 2                  | 36 | GCT:0.222222                       | G:0.777778        |
| chr28 | 10089396 3                  | 36 | CCTCTCTCT:0.194444                 | C:                |
|       | 0.361111 CCT:0.444444       |    |                                    |                   |
| chr28 | 10089464 2                  | 36 | A:0.166667                         | G:0.833333        |
| chr28 | 10089623 2                  | 14 | TA:1 T:0                           |                   |
| chr28 | 10089847 3                  | 36 | GTCTC:0.444444                     | G:0.0833333       |
|       | GTC:0.472222                |    |                                    |                   |
| chr28 | 10089900 2                  | 38 | A:0.236842                         | AAAAAG:0.763158   |
| chr28 | 10089994 2                  | 34 | T:0.235294                         | C:0.764706        |
| chr28 | 10090186 2                  | 26 | G:0.192308                         | T:0.807692        |
| chr28 | 10090333 2                  | 28 | G:0.5 A:0.5                        |                   |
| chr28 | 10090414 2                  | 22 | CCT:0.318182                       | C:0.681818        |
| chr28 | 10090458 3                  | 34 | A:0.970588                         | AAAAT:0.0294118   |
|       | AAAATAAAT:0                 |    |                                    |                   |
| chr28 | 10090502 5                  | 34 | T:0.176471                         | TAAATA:0.205882   |
|       | TAAATAAATA:0.147059         |    | TAAATAAATAAATA:0.0882353           |                   |
|       | TAAATAAATAAATAAATA:0.382353 |    |                                    |                   |
| chr28 | 10091191 2                  | 32 | AAAAAAG:0.65625                    | A:0.34375         |
| chr28 | 10091192 2                  | 32 | AAAAAAG:0.625                      | A:0.375           |
| chr28 | 10091349 2                  | 38 | C:0.236842                         | A:0.763158        |
| chr28 | 10091547 2                  | 32 | T:0.3125 TCC:0.6875                |                   |
| chr28 | 10091937 2                  | 34 | TTC:0.205882                       | T:0.794118        |
| chr28 | 10092104 2                  | 34 | C:0.176471                         | CA:0.823529       |
| chr28 | 10092126 2                  | 36 | T:0.222222                         | TAAAATA:0.777778  |
| chr28 | 10092158 2                  | 20 | T:0.9 TA:0.1                       |                   |
| chr28 | 10092160 2                  | 32 | A:0.875 AAAATAAAT:0.125            |                   |
| chr28 | 10092165 2                  | 20 | A:0.9 AAAT:0.1                     |                   |
| chr28 | 10092348 2                  | 30 | G:0.7 A:0.3                        |                   |
| chr28 | 10092577 2                  | 34 | A:0.294118                         | ATAAAT:0.705882   |
| chr28 | 10092836 2                  | 32 | T:0.21875                          | A:0.78125         |
| chr28 | 10092850 2                  | 32 | C:0.21875                          | G:0.78125         |

|       |                 |    |                      |          |                  |
|-------|-----------------|----|----------------------|----------|------------------|
| chr28 | 10093038 2      | 40 | GT:0.2               | G:0.8    |                  |
| chr28 | 10093112 2      | 38 | A:0.236842           |          | AT:0.763158      |
| chr28 | 10093364 2      | 36 | A:0.166667           |          | C:0.833333       |
| chr28 | 10093366 2      | 36 | C:0.166667           |          | T:0.833333       |
| chr28 | 10093569 2      | 40 | G:0.275              | C:0.725  |                  |
| chr28 | 10093578 2      | 40 | G:0.275              | A:0.725  |                  |
| chr28 | 10093621 2      | 38 | G:0.184211           |          | A:0.815789       |
| chr28 | 10093670 2      | 40 | T:0.175              | C:0.825  |                  |
| chr28 | 10093679 2      | 40 | G:1                  | A:0      |                  |
| chr28 | 10093886 2      | 36 | C:0.583333           |          | CGCATT:0.416667  |
| chr28 | 10093997 2      | 36 | G:0.611111           |          | A:0.388889       |
| chr28 | 10094136 2      | 34 | G:0.588235           |          | A:0.411765       |
| chr28 | 10094540 2      | 36 | C:1                  | G:0      |                  |
| chr28 | 10094866 2      | 34 | G:0.970588           |          | GA:0.0294118     |
| chr28 | 10095524 2      | 10 | C:0.4                | G:0.6    |                  |
| chr28 | 10095808 2      | 30 | T:0.733333           |          | A:0.266667       |
| chr28 | 10095961 2      | 36 | C:0.583333           |          | A:0.416667       |
| chr28 | 10096511 5      | 40 | AAC:0.75             | A:0.05   | AACAC:0 AACACAC: |
|       | 0.2 AACACACAC:0 |    |                      |          |                  |
| chr28 | 10096535 2      | 40 | C:0.55               | CAT:0.45 |                  |
| chr28 | 10096621 2      | 36 | A:0.583333           |          | G:0.416667       |
| chr28 | 10097262 2      | 36 | CA:1                 | C:0      |                  |
| chr28 | 10098620 2      | 34 | G:0.705882           |          | A:0.294118       |
| chr28 | 10098707 2      | 40 | T:0.7                | C:0.3    |                  |
| chr28 | 10099037 2      | 36 | G:0.638889           |          | C:0.361111       |
| chr28 | 10099202 2      | 38 | C:1                  | T:0      |                  |
| chr28 | 10099239 2      | 36 | T:0.694444           |          | TC:0.305556      |
| chr28 | 10099738 2      | 40 | G:0.65               | T:0.35   |                  |
| chr28 | 10100126 2      | 36 | C:0.972222           |          | T:0.0277778      |
| chr28 | 10100782 2      | 40 | T:1                  | C:0      |                  |
| chr28 | 10100882 2      | 38 | C:0.605263           |          | T:0.394737       |
| chr28 | 10101917 2      | 36 | T:0.694444           |          | TA:0.305556      |
| chr28 | 10102255 2      | 34 | C:0.588235           |          | T:0.411765       |
| chr28 | 10102743 2      | 38 | T:0.578947           |          | A:0.421053       |
| chr28 | 10103171 2      | 36 | G:1                  | A:0      |                  |
| chr28 | 10103202 2      | 32 | TA:0.6875            |          | T:0.3125         |
| chr28 | 10103505 2      | 36 | T:0.75               | C:0.25   |                  |
| chr28 | 10103578 2      | 38 | T:0.684211           |          | A:0.315789       |
| chr28 | 10103655 2      | 34 | G:0.588235           |          | A:0.411765       |
| chr28 | 10103847 2      | 38 | T:1                  | C:0      |                  |
| chr28 | 10104001 2      | 36 | C:0.75               | A:0.25   |                  |
| chr28 | 10104218 2      | 40 | T:0.625              | C:0.375  |                  |
| chr28 | 10105506 2      | 36 | A:0                  | T:1      |                  |
| chr28 | 10105512 2      | 36 | G:0                  | T:1      |                  |
| chr28 | 10105531 2      | 38 | C:0.947368           |          | T:0.0526316      |
| chr28 | 10105576 2      | 38 | A:0.736842           |          | AT:0.263158      |
| chr28 | 10105579 2      | 38 | A:0.736842           |          | T:0.263158       |
| chr28 | 10106044 2      | 34 | T:0.705882           |          | A:0.294118       |
| chr28 | 10106203 2      | 36 | ACACCCTGGGC:0.555556 |          | A:               |
|       | 0.444444        |    |                      |          |                  |
| chr28 | 10106407 2      | 38 | T:0.684211           |          | C:0.315789       |
| chr28 | 10106817 2      | 34 | T:0.617647           |          | C:0.382353       |
| chr28 | 10107030 2      | 36 | T:0.666667           |          | C:0.333333       |
| chr28 | 10107056 2      | 38 | G:0.657895           |          | GT:0.342105      |

|       |                          |    |                     |              |
|-------|--------------------------|----|---------------------|--------------|
| chr28 | 10107095 2               | 38 | A:0.657895          | G:0.342105   |
| chr28 | 10107288 2               | 36 | C:0.694444          | A:0.305556   |
| chr28 | 10107430 2               | 36 | G:0.611111          | A:0.388889   |
| chr28 | 10107531 2               | 40 | T:0.675 A:0.325     |              |
| chr28 | 10107690 2               | 40 | G:1 A:0             |              |
| chr28 | 10107722 2               | 38 | G:0.736842          | A:0.263158   |
| chr28 | 10108281 2               | 36 | A:0.583333          | C:0.416667   |
| chr28 | 10108956 2               | 36 | A:0.861111          | T:0.138889   |
| chr28 | 10109651 2               | 40 | T:0.725 A:0.275     |              |
| chr28 | 10109700 2               | 38 | C:1 G:0             |              |
| chr28 | 10110817 2               | 36 | C:0.583333          | CT:0.416667  |
| chr28 | 10111283 2               | 36 | G:0.694444          | T:0.305556   |
| chr28 | 10111747 2               | 38 | C:0.657895          | CT:0.342105  |
| chr28 | 10112779 2               | 38 | T:0.526316          | A:0.473684   |
| chr28 | 10112970 2               | 38 | T:0.552632          | C:0.447368   |
| chr28 | 10113257 2               | 36 | A:0.75 G:0.25       |              |
| chr28 | 10113277 2               | 38 | G:0.631579          | A:0.368421   |
| chr28 | 10113438 2               | 34 | T:0.647059          | G:0.352941   |
| chr28 | 10113915 2               | 34 | A:0.676471          | G:0.323529   |
| chr28 | 10113965 2               | 38 | T:0.684211          | A:0.315789   |
| chr28 | 10115385 3               | 36 | TAAA:0.5            | T:0 TAAA:0.5 |
| chr28 | 10115597 2               | 34 | G:0.970588          | A:0.0294118  |
| chr28 | 10115897 2               | 34 | C:1 CGTT:0          |              |
| chr28 | 10116159 2               | 36 | CAG:0.722222        | C:0.277778   |
| chr28 | 10116680 2               | 30 | G:0.766667          | GA:0.233333  |
| chr28 | 10117651 2               | 38 | C:0.710526          | T:0.289474   |
| chr28 | 10117766 2               | 34 | C:0.735294          | CT:0.264706  |
| chr28 | 10119515 2               | 36 | T:1 C:0             |              |
| chr28 | 10119785 2               | 36 | G:0.694444          | A:0.305556   |
| chr28 | 10120019 2               | 36 | C:1 T:0             |              |
| chr28 | 10120177 2               | 38 | A:0.631579          | G:0.368421   |
| chr28 | 10120315 2               | 36 | G:0.638889          | A:0.361111   |
| chr28 | 10120745 2               | 36 | G:1 A:0             |              |
| chr28 | 10121284 2               | 40 | T:0.7 TTTAC:0.3     |              |
| chr28 | 10121586 2               | 36 | C:0.611111          | T:0.388889   |
| chr28 | 10122715 2               | 32 | C:0.65625           | CT:0.34375   |
| chr28 | 10122759 2               | 38 | G:0.578947          | C:0.421053   |
| chr28 | 10122974 2               | 40 | ATCATGATCCCAGGG:0.6 | A:0.4        |
| chr28 | 10123077 2               | 38 | T:0.631579          | C:0.368421   |
| chr28 | 10124051 2               | 36 | A:0.666667          | C:0.333333   |
| chr28 | 10124215 2               | 36 | C:0.694444          | T:0.305556   |
| chr28 | 10124244 2               | 34 | A:0.852941          | AT:0.147059  |
| chr28 | 10124862 2               | 38 | ATT:0.842105        | A:0.157895   |
| chr28 | 10124867 3               | 38 | T:0.5 TAAA:0.157895 | TA:          |
|       | 0.342105                 |    |                     |              |
| chr28 | 10124999 4               | 40 | G:0.625 GTCTC:0.05  | GTCTCTC:     |
|       | 0.05 GTCTCTCTCTCTC:0.275 |    |                     |              |
| chr28 | 10125084 2               | 38 | A:0.684211          | T:0.315789   |
| chr28 | 10125493 2               | 34 | C:0.735294          | T:0.264706   |
| chr28 | 10125613 2               | 34 | G:0.764706          | A:0.235294   |
| chr28 | 10125652 2               | 32 | A:0.96875           | AT:0.03125   |
| chr28 | 10125921 2               | 38 | C:1 G:0             |              |
| chr28 | 10125998 2               | 40 | C:0.975 T:0.025     |              |
| chr28 | 10126072 2               | 38 | AC:0.657895         | A:0.342105   |

|                    |          |   |    |                 |                  |      |
|--------------------|----------|---|----|-----------------|------------------|------|
| chr28              | 10126127 | 2 | 38 | T:0.578947      | A:0.421053       |      |
| chr28              | 10126138 | 2 | 36 | T:0.833333      | C:0.166667       |      |
| chr28              | 10126617 | 2 | 36 | T:0.861111      | C:0.138889       |      |
| chr28              | 10126622 | 2 | 36 | T:1             | C:0              |      |
| chr28              | 10126737 | 2 | 38 | A:0.578947      | G:0.421053       |      |
| chr28              | 10127431 | 2 | 36 | T:0.583333      | TA:0.416667      |      |
| chr28              | 10127853 | 2 | 36 | G:0.972222      | A:0.0277778      |      |
| chr28              | 10127978 | 2 | 36 | C:0.861111      | T:0.138889       |      |
| chr28              | 10128193 | 3 | 36 | T:0.472222      | TA:0.527778      |      |
| TAA:0              |          |   |    |                 |                  |      |
| chr28              | 10128339 | 2 | 34 | A:0.617647      | G:0.382353       |      |
| chr28              | 10128587 | 2 | 32 | A:0.46875       | G:0.53125        |      |
| chr28              | 10128663 | 2 | 30 | G:0.633333      | A:0.366667       |      |
| chr28              | 10128703 | 2 | 34 | A:0.529412      | G:0.470588       |      |
| chr28              | 10128796 | 2 | 36 | A:0.694444      | G:0.305556       |      |
| chr28              | 10128797 | 2 | 36 | A:0.638889      | G:0.361111       |      |
| chr28              | 10129048 | 2 | 38 | C:0.789474      | T:0.210526       |      |
| chr28              | 10129091 | 2 | 34 | T:0.441176      | A:0.558824       |      |
| chr28              | 10129195 | 2 | 38 | ATCT:0.973684   | A:0.0263158      |      |
| chr28              | 10129258 | 2 | 36 | AG:0.944444     | A:0.0555556      |      |
| chr28              | 10129397 | 2 | 38 | T:0.789474      | G:0.210526       |      |
| chr28              | 10129433 | 2 | 36 | A:0.416667      | G:0.583333       |      |
| chr28              | 10129449 | 2 | 36 | G:0.666667      | A:0.333333       |      |
| chr28              | 10129496 | 2 | 36 | T:0             | G:1              |      |
| chr28              | 10129566 | 2 | 32 | T:0.90625       | A:0.09375        |      |
| chr28              | 10129780 | 4 | 40 | A:0.425         | AGTTGTTGTT:0.425 |      |
| AGTTGTTGTTGTT:0.15 |          |   |    | AGTTGTTGTTGTT:0 |                  |      |
| chr28              | 10130205 | 2 | 40 | C:0.975         | T:0.025          |      |
| chr28              | 10130209 | 2 | 40 | T:0.45          | C:0.55           |      |
| chr28              | 10130249 | 2 | 30 | C:0.2           | CCT:0.8          |      |
| chr28              | 10130303 | 2 | 34 | TA:0.735294     | T:0.264706       |      |
| chr28              | 10130475 | 2 | 38 | G:0.947368      | A:0.0526316      |      |
| chr28              | 10130573 | 2 | 38 | G:0.868421      | A:0.131579       |      |
| chr28              | 10130657 | 2 | 26 | C:1             | CCT:0            |      |
| chr28              | 10130720 | 2 | 30 | TAA:0.866667    | T:0.133333       |      |
| chr28              | 10130743 | 2 | 36 | C:0.583333      | T:0.416667       |      |
| chr28              | 10130774 | 2 | 38 | A:0             | G:1              |      |
| chr28              | 10130874 | 2 | 22 | G:0.136364      | C:0.863636       |      |
| chr28              | 10131021 | 2 | 20 | T:0             | TA:1             |      |
| chr28              | 10131487 | 2 | 32 | G:0.96875       | T:0.03125        |      |
| chr28              | 10131492 | 2 | 36 | T:0.361111      | G:0.638889       |      |
| chr28              | 10131505 | 2 | 36 | T:0.361111      | C:0.638889       |      |
| chr28              | 10131651 | 2 | 36 | G:0.833333      | GC:0.166667      |      |
| chr28              | 10131678 | 2 | 38 | C:0.973684      | T:0.0263158      |      |
| chr28              | 10131857 | 2 | 32 | TG:0.78125      | T:0.21875        |      |
| chr28              | 10132020 | 2 | 40 | G:0.825         | GT:0.175         |      |
| chr28              | 10132022 | 3 | 38 | TC:0.657895     | T:0              | TCC: |
| 0.342105           |          |   |    |                 |                  |      |
| chr28              | 10132439 | 2 | 38 | T:0.736842      | C:0.263158       |      |
| chr28              | 10132652 | 3 | 36 | CT:0.416667     | C:0.416667       |      |
| CTT:0.166667       |          |   |    |                 |                  |      |
| chr28              | 10132900 | 2 | 36 | C:0.972222      | T:0.0277778      |      |
| chr28              | 10133410 | 2 | 36 | T:0.638889      | TC:0.361111      |      |
| chr28              | 10133788 | 2 | 40 | G:1             | GAA:0            |      |

|              |          |   |    |                                      |         |              |
|--------------|----------|---|----|--------------------------------------|---------|--------------|
| chr28        | 10133978 | 2 | 30 | T:0.7                                | A:0.3   |              |
| chr28        | 10134071 | 2 | 30 | C:0.666667                           |         | T:0.333333   |
| chr28        | 10134365 | 2 | 30 | A:0.533333                           |         | G:0.466667   |
| chr28        | 10134481 | 2 | 34 | G:0.588235                           |         | A:0.411765   |
| chr28        | 10134640 | 2 | 34 | AT:0.529412                          |         | A:0.470588   |
| chr28        | 10134643 | 2 | 34 | AAT:0.529412                         |         | A:0.470588   |
| chr28        | 10134645 | 2 | 32 | TA:0.59375                           |         | T:0.40625    |
| chr28        | 10134653 | 2 | 34 | A:0.529412                           |         | T:0.470588   |
| chr28        | 10134828 | 2 | 28 | C:0.535714                           |         | T:0.464286   |
| chr28        | 10136462 | 2 | 36 | C:0.944444                           |         | T:0.0555556  |
| chr28        | 10136854 | 2 | 36 | T:0.972222                           |         | C:0.0277778  |
| chr28        | 10137070 | 2 | 40 | GAAAAAGAAAACCAAAAAAAAAAAAAAAAAAAAAA: |         |              |
| 0.6          | G:0.4    |   |    |                                      |         |              |
| chr28        | 10137137 | 2 | 34 | G:0.676471                           |         | A:0.323529   |
| chr28        | 10137644 | 2 | 34 | G:0.588235                           |         | A:0.411765   |
| chr28        | 10137692 | 2 | 32 | C:0.875                              | T:0.125 |              |
| chr28        | 10137697 | 2 | 32 | T:0.875                              | A:0.125 |              |
| chr28        | 10137774 | 2 | 36 | C:1                                  | CCTCT:0 |              |
| chr28        | 10137795 | 2 | 34 | C:0.588235                           |         | CTG:0.411765 |
| chr28        | 10138143 | 2 | 30 | A:0.6                                | G:0.4   |              |
| chr28        | 10138144 | 2 | 30 | T:0.6                                | A:0.4   |              |
| chr28        | 10138331 | 2 | 30 | T:0.633333                           |         | C:0.366667   |
| chr28        | 10138822 | 2 | 30 | C:0.866667                           |         | G:0.133333   |
| chr28        | 10138986 | 2 | 34 | G:0.411765                           |         | A:0.588235   |
| chr28        | 10139094 | 2 | 38 | T:0.605263                           |         | A:0.394737   |
| chr28        | 10139240 | 2 | 38 | T:0.973684                           |         | C:0.0263158  |
| chr28        | 10139597 | 2 | 40 | A:0.625                              | C:0.375 |              |
| chr28        | 10139797 | 2 | 40 | G:1                                  | A:0     |              |
| chr28        | 10140077 | 2 | 40 | C:0                                  | G:1     |              |
| chr28        | 10140097 | 2 | 40 | AG:0                                 | A:1     |              |
| chr28        | 10140385 | 3 | 36 | TA:0.388889                          |         | T:0.277778   |
| TAA:0.333333 |          |   |    |                                      |         |              |
| chr28        | 10140474 | 2 | 32 | G:1                                  | A:0     |              |
| chr28        | 10140533 | 2 | 30 | ATC:0.533333                         |         | A:0.466667   |
| chr28        | 10140599 | 2 | 40 | T:0.2                                | A:0.8   |              |
| chr28        | 10140961 | 2 | 36 | C:0.861111                           |         | T:0.138889   |
| chr28        | 10141158 | 2 | 40 | G:0.975                              | T:0.025 |              |
| chr28        | 10141522 | 2 | 38 | G:1                                  | A:0     |              |
| chr28        | 10141979 | 2 | 40 | G:0.425                              | A:0.575 |              |
| chr28        | 10142270 | 2 | 36 | G:1                                  | A:0     |              |
| chr28        | 10142335 | 2 | 38 | T:0.973684                           |         | C:0.0263158  |
| chr28        | 10142667 | 2 | 34 | G:1                                  | A:0     |              |
| chr28        | 10142776 | 2 | 36 | CCT:0.861111                         |         | C:0.138889   |
| chr28        | 10142881 | 2 | 36 | T:0.944444                           |         | G:0.0555556  |
| chr28        | 10143149 | 2 | 38 | T:0.868421                           |         | A:0.131579   |
| chr28        | 10143281 | 2 | 34 | G:0.970588                           |         | A:0.0294118  |
| chr28        | 10143371 | 2 | 30 | C:1                                  | T:0     |              |
| chr28        | 10143432 | 2 | 38 | A:0.973684                           |         | T:0.0263158  |
| chr28        | 10143856 | 2 | 34 | A:0.588235                           |         | G:0.411765   |
| chr28        | 10144051 | 2 | 34 | G:0.941176                           |         | A:0.0588235  |
| chr28        | 10144301 | 2 | 36 | T:0.888889                           |         | C:0.111111   |
| chr28        | 10144486 | 2 | 34 | A:0.970588                           |         | G:0.0294118  |
| chr28        | 10144544 | 2 | 30 | CCT:0.7                              | C:0.3   |              |
| chr28        | 10144548 | 2 | 40 | T:0.8                                |         |              |

TCTCTCTCTCTCTCTCTGCTTCTCCCTCTGCCTGTGTCTCTGC:0.2

|                     |            |                       |                   |                          |
|---------------------|------------|-----------------------|-------------------|--------------------------|
| chr28               | 10144605 2 | 38                    | TA:1 T:0          |                          |
| chr28               | 10144851 2 | 38                    | G:0.973684        | A:0.0263158              |
| chr28               | 10145459 2 | 36                    | C:0.388889        | CTA:0.611111             |
| chr28               | 10145579 2 | 38                    | T:0.631579        | G:0.368421               |
| chr28               | 10145854 2 | 40                    | T:0.3 C:0.7       |                          |
| chr28               | 10145985 2 | 36                    | G:0.972222        | T:0.0277778              |
| chr28               | 10145992 2 | 36                    | T:0.972222        | C:0.0277778              |
| chr28               | 10146039 2 | 38                    | GGTGT:0.657895    | G:0.342105               |
| chr28               | 10146058 2 | 38                    | G:0.842105        | GTA:0.157895             |
| chr28               | 10146103 2 | 38                    | T:0.657895        | C:0.342105               |
| chr28               | 10146246 2 | 38                    | A:0.842105        | G:0.157895               |
| chr28               | 10146279 2 | 40                    | T:0.575 C:0.425   |                          |
| chr28               | 10147010 2 | 40                    | G:0.15 C:0.85     |                          |
| chr28               | 10147135 2 | 36                    | G:0.111111        | C:0.888889               |
| chr28               | 10147191 2 | 36                    | T:0.944444        | G:0.0555556              |
| chr28               | 10147472 2 | 36                    | A:0.944444        | G:0.0555556              |
| chr28               | 10147807 2 | 40                    | T:0 TC:1          |                          |
| chr28               | 10148232 2 | 30                    | GA:0.833333       | G:0.166667               |
| chr28               | 10148242 2 | 30                    | AGAG:0.833333     | A:0.166667               |
| chr28               | 10148245 3 | 38                    | GAAGA:1 G:0       | GAAGAAAGA:0              |
| chr28               | 10148288 2 | 36                    | GAA:1 G:0         |                          |
| chr28               | 10148294 2 | 16                    | AAG:0.6875        | A:0.3125                 |
| chr28               | 10148300 2 | 18                    | GAA:0.5 G:0.5     |                          |
| chr28               | 10148412 2 | 38                    | C:1 T:0           |                          |
| chr28               | 10149146 2 | 36                    | T:0.138889        | G:0.861111               |
| chr28               | 10149410 2 | 38                    | A:0.184211        | G:0.815789               |
| chr28               | 10149449 2 | 36                    | G:1 T:0           |                          |
| chr28               | 10149841 2 | 36                    | C:0.888889        | CT:0.111111              |
| chr28               | 10149893 2 | 34                    | A:0.941176        | T:0.0588235              |
| chr28               | 10149980 2 | 36                    | C:0.916667        | T:0.0833333              |
| chr28               | 10149999 2 | 34                    | G:0.970588        | C:0.0294118              |
| chr28               | 10150042 2 | 36                    | T:0.944444        | C:0.0555556              |
| chr28               | 10150292 2 | 36                    | A:0.194444        | T:0.805556               |
| chr28               | 10150297 2 | 38                    | G:0.973684        | T:0.0263158              |
| chr28               | 10150322 2 | 38                    | C:0.973684        | T:0.0263158              |
| chr28               | 10150341 2 | 38                    | AT:0.921053       | A:0.0789474              |
| chr28               | 10150377 4 | 38                    | CAG:0.789474      | C:0.131579               |
| CAGAGAGAG:0.0263158 |            | CAGAGAGAGAG:0.0526316 |                   |                          |
| chr28               | 10150480 2 | 36                    | A:0.972222        | ACATCCTGAG:<br>0.0277778 |
| chr28               | 10150723 2 | 38                    | CCTTAT:0.947368   | C:0.0526316              |
| chr28               | 10150822 2 | 40                    | C:0.975 A:0.025   |                          |
| chr28               | 10150902 2 | 38                    | A:0.0789474       | T:0.921053               |
| chr28               | 10150992 2 | 40                    | C:0.125 A:0.875   |                          |
| chr28               | 10151037 2 | 36                    | G:0.111111        | T:0.888889               |
| chr28               | 10151226 2 | 32                    | G:0.1875 A:0.8125 |                          |
| chr28               | 10151411 2 | 36                    | T:0.888889        | C:0.111111               |
| chr28               | 10151543 2 | 36                    | AT:0.805556       | A:0.194444               |
| chr28               | 10152372 2 | 34                    | C:0.176471        | T:0.823529               |
| chr28               | 10152413 4 | 30                    | TAA:0.2 T:0.6     | TA:0.2 TAAA:0            |
| chr28               | 10152907 2 | 32                    | GA:0.15625        | G:0.84375                |
| chr28               | 10153343 2 | 34                    | G:0.176471        | A:0.823529               |
| chr28               | 10153365 2 | 36                    | C:0.972222        | T:0.0277778              |

|                                                             |          |   |    |                           |                 |     |
|-------------------------------------------------------------|----------|---|----|---------------------------|-----------------|-----|
| chr28                                                       | 10153418 | 2 | 36 | C:0.138889                | A:0.861111      |     |
| chr28                                                       | 10153642 | 2 | 40 | C:0.975                   | T:0.025         |     |
| chr28                                                       | 10153904 | 2 | 38 | G:0.105263                | A:0.894737      |     |
| chr28                                                       | 10153945 | 2 | 36 | GTC:0.888889              | G:0.111111      |     |
| chr28                                                       | 10153996 | 2 | 38 | T:0.947368                | C:0.0526316     |     |
| chr28                                                       | 10154047 | 2 | 34 | A:0.911765                | G:0.0882353     |     |
| chr28                                                       | 10154104 | 2 | 30 | A:0.8                     | T:0.2           |     |
| chr28                                                       | 10154196 | 2 | 16 | C:0.125                   | CCT:0.875       |     |
| chr28                                                       | 10154306 | 2 | 32 | C:0.96875                 | A:0.03125       |     |
| chr28                                                       | 10154338 | 2 | 38 | C:0.210526                |                 |     |
| CCAAAAAAAAACAAAAAAAAACAAAAAAAAATAATTAAAAAAAAAAAAAAAAAAAAAA: |          |   |    |                           |                 |     |
| 0.789474                                                    |          |   |    |                           |                 |     |
| chr28                                                       | 10154339 | 2 | 38 | G:0.210526                | GAACCTGCCTTCC:  |     |
| 0.789474                                                    |          |   |    |                           |                 |     |
| chr28                                                       | 10154461 | 3 | 30 | T:0.133333                | TA:0.466667     |     |
| TAA:0.4                                                     |          |   |    |                           |                 |     |
| chr28                                                       | 10154689 | 2 | 40 | C:0.35                    | G:0.65          |     |
| chr28                                                       | 10154839 | 2 | 28 | CCTCT:0.0714286           | C:0.928571      |     |
| chr28                                                       | 10154898 | 3 | 36 | CA:0.777778               | C:0.166667      |     |
| CAA:0.0555556                                               |          |   |    |                           |                 |     |
| chr28                                                       | 10155088 | 2 | 34 | TAAAAGTTTTTAAAAA:0.911765 | T:              |     |
| 0.0882353                                                   |          |   |    |                           |                 |     |
| chr28                                                       | 10155093 | 2 | 34 | GTTTTTAAAAAAAAGT:0.970588 |                 |     |
| G:0.0294118                                                 |          |   |    |                           |                 |     |
| chr28                                                       | 10155179 | 2 | 38 | G:0.921053                | GA:0.0789474    |     |
| chr28                                                       | 10155187 | 2 | 38 | T:0.552632                | A:0.447368      |     |
| chr28                                                       | 10155196 | 2 | 38 | T:0.868421                | A:0.131579      |     |
| chr28                                                       | 10155249 | 2 | 22 | T:0.909091                | C:0.0909091     |     |
| chr28                                                       | 10155371 | 2 | 32 | G:0.84375                 | C:0.15625       |     |
| chr28                                                       | 10155420 | 2 | 38 | A:0.789474                | T:0.210526      |     |
| chr28                                                       | 10155466 | 2 | 26 | ATC:0.846154              | A:0.153846      |     |
| chr28                                                       | 10155468 | 2 | 28 | CTCT:0.928571             | C:0.0714286     |     |
| chr28                                                       | 10155470 | 2 | 26 | C:0.230769                | T:0.769231      |     |
| chr28                                                       | 10155496 | 2 | 28 | T:0.928571                | TGATA:0.0714286 |     |
| chr28                                                       | 10155500 | 2 | 28 | ACT:0.928571              | A:0.0714286     |     |
| chr28                                                       | 10155509 | 2 | 28 | GAC:0.928571              | G:0.0714286     |     |
| chr28                                                       | 10155611 | 2 | 40 | GC:0                      | G:1             |     |
| chr28                                                       | 10155632 | 2 | 30 | T:0.0333333               | C:0.966667      |     |
| chr28                                                       | 10155666 | 2 | 32 | T:0.90625                 | TA:0.09375      |     |
| chr28                                                       | 10155667 | 3 | 32 | T:0.125                   | A:0.09375       | TA: |
| 0.78125                                                     |          |   |    |                           |                 |     |
| chr28                                                       | 10155678 | 2 | 28 | T:0                       | TA:1            |     |
| chr28                                                       | 10155975 | 2 | 38 | C:0.947368                | CTAA:0.0526316  |     |
| chr28                                                       | 10156113 | 2 | 36 | C:0.0277778               | A:0.972222      |     |
| chr28                                                       | 10156169 | 2 | 34 | AAATT:0.970588            | A:0.0294118     |     |
| chr28                                                       | 10156261 | 2 | 40 | T:0.15                    | C:0.85          |     |
| chr28                                                       | 10156606 | 2 | 36 | G:0.944444                | A:0.0555556     |     |
| chr28                                                       | 10156658 | 2 | 32 | C:0.09375                 | CT:0.90625      |     |
| chr28                                                       | 10156835 | 2 | 32 | G:0.21875                 | A:0.78125       |     |
| chr28                                                       | 10156897 | 2 | 34 | T:0.147059                | C:0.852941      |     |
| chr28                                                       | 10157052 | 2 | 34 | T:0.970588                | TA:0.0294118    |     |
| chr28                                                       | 10157058 | 4 | 34 | T:0.852941                | TTTTA:0.0588235 |     |
| TTA:0.0294118                                               |          |   |    |                           |                 |     |
| TTTTATTATTTA:0.0588235                                      |          |   |    |                           |                 |     |
| chr28                                                       | 10157251 | 2 | 36 | C:0.694444                |                 |     |



CTATATGAGTAAACTTTACAATATTTCTGAAAGATCCAAAAATAGACTGGATCCATCGATAA:  
0.305556

|                             |          |   |    |                         |                |
|-----------------------------|----------|---|----|-------------------------|----------------|
| chr28                       | 10157831 | 3 | 38 | TA:0.552632             | T:0.447368     |
| TAA:0                       |          |   |    |                         |                |
| chr28                       | 10158165 | 2 | 34 | GTGTC:0.970588          | G:0.0294118    |
| chr28                       | 10158167 | 3 | 36 | GTCTCTCTC:0.638889      | G:             |
| 0.0833333 GTCTCTC:0.277778  |          |   |    |                         |                |
| chr28                       | 10158232 | 3 | 36 | TAAAAAA:0.722222        | TA:0.25 T:     |
| 0.0277778                   |          |   |    |                         |                |
| chr28                       | 10158238 | 2 | 28 | A:0.964286              | ATT:0.0357143  |
| chr28                       | 10158290 | 2 | 30 | A:0.933333              | AG:0.0666667   |
| chr28                       | 10158392 | 2 | 34 | T:0.0882353             | C:0.911765     |
| chr28                       | 10158447 | 2 | 32 | CT:0.96875              | C:0.03125      |
| chr28                       | 10158486 | 2 | 38 | T:0.947368              | TAC:0.0526316  |
| chr28                       | 10158490 | 3 | 38 | C:0.973684              | CAGAGAGAGAGAG: |
| 0.0263158 CAGAGAGAGAGAGAG:0 |          |   |    |                         |                |
| chr28                       | 10158492 | 2 | 38 | G:0.947368              | C:0.0526316    |
| chr28                       | 10158537 | 2 | 38 | G:0.131579              | T:0.868421     |
| chr28                       | 10158667 | 2 | 36 | A:0.972222              | G:0.0277778    |
| chr28                       | 10159009 | 2 | 36 | G:0.138889              | A:0.861111     |
| chr28                       | 10159257 | 2 | 34 | G:1 GA:0                |                |
| chr28                       | 10159626 | 2 | 36 | A:0.916667              | T:0.0833333    |
| chr28                       | 10159654 | 2 | 38 | T:0.894737              | A:0.105263     |
| chr28                       | 10159695 | 2 | 38 | T:0.868421              | C:0.131579     |
| chr28                       | 10159868 | 2 | 32 | C:0.78125               | CT:0.21875     |
| chr28                       | 10159995 | 2 | 24 | C:1 T:0                 |                |
| chr28                       | 10160300 | 2 | 28 | C:0.892857              | T:0.107143     |
| chr28                       | 10160324 | 2 | 32 | C:0.96875               | T:0.03125      |
| chr28                       | 10160325 | 2 | 32 | G:0.8125 T:0.1875       |                |
| chr28                       | 10160674 | 2 | 34 | C:0.0882353             | A:0.911765     |
| chr28                       | 10161160 | 2 | 38 | A:0.947368              | G:0.0526316    |
| chr28                       | 10161412 | 2 | 38 | TAATTTATA:0.894737      | T:             |
| 0.105263                    |          |   |    |                         |                |
| chr28                       | 10161423 | 2 | 38 | GA:0.921053             | G:0.0789474    |
| chr28                       | 10161772 | 2 | 34 | TTC:0.941176            | T:0.0588235    |
| chr28                       | 10161810 | 2 | 40 | CTGTGTGTGTGTG:0.15      | C:0.85         |
| chr28                       | 10161852 | 2 | 34 | T:0.852941              | A:0.147059     |
| chr28                       | 10161975 | 2 | 38 | C:0.868421              | A:0.131579     |
| chr28                       | 10162099 | 2 | 32 | TCA:0.1875              | T:0.8125       |
| chr28                       | 10162212 | 2 | 38 | CACTT:0.0789474         | C:0.921053     |
| chr28                       | 10162302 | 4 | 36 | C:0.111111              | CT:0.111111    |
| CTT:0.361111 CTTT:0.416667  |          |   |    |                         |                |
| chr28                       | 10162453 | 2 | 30 | C:0.166667              | T:0.833333     |
| chr28                       | 10162530 | 2 | 38 | A:0.947368              | G:0.0526316    |
| chr28                       | 10162553 | 2 | 38 | C:0.973684              | A:0.0263158    |
| chr28                       | 10162727 | 2 | 34 | G:1 A:0                 |                |
| chr28                       | 10162764 | 2 | 32 | A:0.875 G:0.125         |                |
| chr28                       | 10162876 | 3 | 34 | T:0.205882              | TAAA:0.411765  |
| TAAAA:0.382353              |          |   |    |                         |                |
| chr28                       | 10162901 | 2 | 32 | T:0.90625               | A:0.09375      |
| chr28                       | 10163470 | 2 | 24 | G:0.958333              | T:0.0416667    |
| chr28                       | 10164070 | 2 | 34 | GTCTC:1 G:0             |                |
| chr28                       | 10164099 | 2 | 38 | TCTG:0.947368           | T:0.0526316    |
| chr28                       | 10164101 | 4 | 40 | T:0.9 TC:0.075 TCTCTC:0 |                |

TCTCTCTCTCTC:0.025

|                          |            |    |                            |                  |
|--------------------------|------------|----|----------------------------|------------------|
| chr28                    | 10164102 2 | 40 | G:0.9                      | T:0.1            |
| chr28                    | 10164474 2 | 32 | G:0.1875                   | A:0.8125         |
| chr28                    | 10164559 2 | 36 | A:0.972222                 | AGCGCC:0.0277778 |
| chr28                    | 10164587 2 | 34 | C:0.941176                 | T:0.0588235      |
| chr28                    | 10164611 2 | 36 | C:1                        | T:0              |
| chr28                    | 10164666 2 | 32 | C:0.15625                  | G:0.84375        |
| chr28                    | 10164669 2 | 32 | TCTTC:0.96875              | T:0.03125        |
| chr28                    | 10164671 3 | 36 | TTCGTTC:0.194444           | T:0.75 TGTC:     |
| 0.0555556                |            |    |                            |                  |
| chr28                    | 10164675 2 | 32 | T:0.90625                  | TC:0.09375       |
| chr28                    | 10164677 2 | 32 | C:0.90625                  | CT:0.09375       |
| chr28                    | 10164702 2 | 30 | A:0                        | AG:1             |
| chr28                    | 10164787 2 | 38 | C:0.868421                 | G:0.131579       |
| chr28                    | 10164880 2 | 40 | G:0.175                    | A:0.825          |
| chr28                    | 10165039 2 | 30 | TCATG:0.233333             | T:0.766667       |
| chr28                    | 10165148 3 | 36 | T:0.166667                 |                  |
| TTCTCTCTCTCTCTC:0.111111 |            |    | TTCTCTCTCTCTCTCTC:0.722222 |                  |
| chr28                    | 10165184 4 | 34 | TAAA:0.264706              | T:0.529412       |
| TA:0.205882              | TAA:0      |    |                            |                  |
| chr28                    | 10165347 2 | 24 | C:0.125                    | CA:0.875         |
| chr28                    | 10165388 2 | 32 | C:1                        | T:0              |
| chr28                    | 10165697 2 | 34 | G:0.852941                 | A:0.147059       |
| chr28                    | 10165799 2 | 38 | C:0.815789                 | A:0.184211       |
| chr28                    | 10165856 2 | 38 | A:0.894737                 | G:0.105263       |
| chr28                    | 10166000 2 | 34 | C:0.911765                 | T:0.0882353      |
| chr28                    | 10166114 2 | 30 | T:0.933333                 | TG:0.0666667     |
| chr28                    | 10166115 3 | 30 | GTTT:0.733333              | G:0.0333333      |
| GTT:0.233333             |            |    |                            |                  |
| chr28                    | 10166116 2 | 30 | T:0.866667                 | TGG:0.133333     |
| chr28                    | 10166119 2 | 30 | T:0.966667                 | G:0.0333333      |
| chr28                    | 10166202 2 | 40 | G:0.9                      | A:0.1            |
| chr28                    | 10166217 2 | 40 | T:0.9                      | C:0.1            |
| chr28                    | 10166314 3 | 36 | TGA:0.833333               | T:0.166667       |
| TGAGAGA:0                |            |    |                            |                  |
| chr28                    | 10166335 2 | 34 | GA:0.970588                | G:0.0294118      |
| chr28                    | 10166338 2 | 34 | AGAGGC:0.970588            | A:0.0294118      |
| chr28                    | 10166523 2 | 38 | G:0.973684                 | GC:0.0263158     |
| chr28                    | 10166524 2 | 36 | T:0.0833333                | C:0.916667       |
| chr28                    | 10166526 2 | 38 | T:0.973684                 | C:0.0263158      |
| chr28                    | 10166527 2 | 36 | CCA:0.0833333              | C:0.916667       |
| chr28                    | 10166529 2 | 38 | A:0.973684                 | G:0.0263158      |
| chr28                    | 10166595 2 | 38 | GAGAGAC:0.973684           | G:0.0263158      |
| chr28                    | 10166651 2 | 36 | A:0.861111                 | G:0.138889       |
| chr28                    | 10166815 2 | 38 | C:0.894737                 | A:0.105263       |
| chr28                    | 10167035 2 | 24 | T:0.916667                 | TA:0.0833333     |
| chr28                    | 10167173 2 | 36 | AT:0.944444                | A:0.0555556      |
| chr28                    | 10167306 2 | 36 | T:0.972222                 | C:0.0277778      |
| chr28                    | 10167353 2 | 36 | C:0.944444                 | T:0.0555556      |
| chr28                    | 10167432 2 | 34 | C:0.970588                 | T:0.0294118      |
| chr28                    | 10167461 2 | 36 | TA:0.972222                | T:0.0277778      |
| chr28                    | 10167532 2 | 36 | G:0.916667                 | A:0.0833333      |
| chr28                    | 10167797 2 | 36 | C:0.888889                 | T:0.111111       |
| chr28                    | 10167871 2 | 38 | G:0.131579                 | A:0.868421       |

|                           |          |   |    |               |               |
|---------------------------|----------|---|----|---------------|---------------|
| chr28                     | 10167923 | 2 | 38 | A:0.894737    | C:0.105263    |
| chr28                     | 10167993 | 2 | 32 | A:0.90625     | G:0.09375     |
| chr28                     | 10168029 | 2 | 34 | G:0.0588235   | GT:0.941176   |
| chr28                     | 10168285 | 2 | 38 | T:0.0526316   | C:0.947368    |
| chr28                     | 10168409 | 2 | 30 | TTG:0.9       | T:0.1         |
| chr28                     | 10168410 | 2 | 24 | TG:0.416667   | T:0.583333    |
| chr28                     | 10168483 | 2 | 40 | A:0.1         | G:0.9         |
| chr28                     | 10168500 | 2 | 40 | TA:0.1        | T:0.9         |
| chr28                     | 10168720 | 2 | 38 | A:0.157895    | G:0.842105    |
| chr28                     | 10169095 | 2 | 32 | A:0.875       | ATT:0.125     |
| chr28                     | 10169138 | 2 | 36 | C:1           | A:0           |
| chr28                     | 10169343 | 2 | 28 | AT:0.821429   | A:0.178571    |
| chr28                     | 10169635 | 2 | 38 | T:1           | A:0           |
| chr28                     | 10169645 | 2 | 38 | T:0.868421    | C:0.131579    |
| chr28                     | 10169770 | 2 | 40 | A:0.925       | G:0.075       |
| chr28                     | 10169804 | 3 | 38 | CTT:0.842105  | C:0.0789474   |
| CT:0.0789474              |          |   |    |               |               |
| chr28                     | 10170040 | 2 | 32 | T:1           | C:0           |
| chr28                     | 10170089 | 2 | 38 | G:0.973684    | GT:0.0263158  |
| chr28                     | 10170108 | 2 | 34 | C:0.882353    | T:0.117647    |
| chr28                     | 10170182 | 5 | 38 | T:0.921053    | TTTTA:0       |
| TTATTTATTTA:0             |          |   |    |               |               |
| TTATTTATTTATTTA:0.0789474 |          |   |    |               |               |
| chr28                     | 10170238 | 2 | 36 | A:0.944444    | G:0.0555556   |
| chr28                     | 10170244 | 2 | 36 | G:0.944444    | T:0.0555556   |
| chr28                     | 10170287 | 2 | 36 | G:1           | A:0           |
| chr28                     | 10170290 | 2 | 36 | G:0.944444    | A:0.0555556   |
| chr28                     | 10170527 | 2 | 38 | T:0.947368    | C:0.0526316   |
| chr28                     | 10170663 | 2 | 38 | C:0.184211    | T:0.815789    |
| chr28                     | 10170835 | 2 | 36 | T:0.0833333   | A:0.916667    |
| chr28                     | 10170916 | 2 | 36 | TA:0.194444   | T:0.805556    |
| chr28                     | 10171137 | 2 | 40 | G:0.125       | A:0.875       |
| chr28                     | 10171237 | 2 | 36 | C:0.944444    | T:0.0555556   |
| chr28                     | 10171367 | 2 | 40 | G:0.2         | GA:0.8        |
| chr28                     | 10171752 | 2 | 34 | T:0.0294118   | C:0.970588    |
| chr28                     | 10171820 | 2 | 34 | T:0.0294118   | TAAA:0.970588 |
| chr28                     | 10171859 | 2 | 36 | G:0.944444    | A:0.0555556   |
| chr28                     | 10171865 | 2 | 36 | G:0.944444    | A:0.0555556   |
| chr28                     | 10171943 | 2 | 40 | G:0.95        | C:0.05        |
| chr28                     | 10172177 | 2 | 36 | C:0.972222    | A:0.0277778   |
| chr28                     | 10172284 | 2 | 34 | CT:0.941176   | C:0.0588235   |
| chr28                     | 10172425 | 2 | 40 | A:0.95        | C:0.05        |
| chr28                     | 10172799 | 2 | 36 | C:0.888889    | T:0.111111    |
| chr28                     | 10173033 | 2 | 36 | A:0.944444    | G:0.0555556   |
| chr28                     | 10173460 | 2 | 34 | G:1           | C:0           |
| chr28                     | 10174465 | 2 | 34 | C:0.117647    | T:0.882353    |
| chr28                     | 10174656 | 2 | 36 | C:0.888889    | T:0.111111    |
| chr28                     | 10175018 | 2 | 30 | TA:0.9        | T:0.1         |
| chr28                     | 10175020 | 2 | 30 | A:0.966667    | T:0.0333333   |
| chr28                     | 10175416 | 2 | 34 | G:0           | C:1           |
| chr28                     | 10175462 | 2 | 32 | C:0.96875     | T:0.03125     |
| chr28                     | 10175676 | 2 | 36 | GCAA:0.944444 | G:0.0555556   |
| chr28                     | 10175995 | 2 | 38 | A:0.947368    | G:0.0526316   |
| chr28                     | 10176036 | 2 | 36 | G:0.972222    | A:0.0277778   |
| chr28                     | 10176088 | 2 | 38 | A:1           | T:0           |

chr28 10176155 2 40 T:0.95  
TAAATATTTTTGTTGAAAAAAAAAAGAAAAA:0.05  
chr28 10176451 2 36 C:0.944444 T:0.0555556  
chr28 10176452 2 36 G:1 A:0  
chr28 10176636 2 36 G:0.944444 A:0.0555556  
chr28 10177037 2 38 C:0 CA:1  
chr28 10177053 2 38 C:0 CA:1  
chr28 10177172 2 34 G:0.941176 A:0.0588235  
chr28 10177588 2 40 T:0.95 A:0.05  
chr28 10177752 2 40 C:0.95 A:0.05  
chr28 10177792 2 34 T:0.941176 C:0.0588235  
chr28 10177951 2 38 G:0.921053 A:0.0789474  
chr28 10177995 2 36 C:0.916667 T:0.0833333  
chr28 10178073 2 32 G:0.09375 A:0.90625  
chr28 10178127 2 34 T:0.941176 C:0.0588235  
chr28 10178215 2 38 T:0.921053 TA:0.0789474  
chr28 10178216 3 38 T:0.921053 TA:0 TATA:  
0.0789474  
chr28 10178259 2 38 G:0.921053 A:0.0789474  
chr28 10178587 2 40 CTGGGAGATGCTT:0.925 C:0.075  
chr28 10178669 2 38 G:0.921053 A:0.0789474  
chr28 10178780 2 40 CA:0.925 C:0.075  
chr28 10178917 2 40 C:0.95 T:0.05  
chr28 10178994 2 40 T:0.95 G:0.05  
chr28 10179163 2 40 C:1 T:0  
chr28 10179338 2 40 T:0.775 C:0.225  
chr28 10179482 2 38 A:1 T:0  
chr28 10179722 2 34 G:0.647059 GTT:0.352941  
chr28 10179732 2 40 T:1 TG:0  
chr28 10179736 2 40 T:0.975 TGTTTTTTT:0.025  
chr28 10179777 2 36 G:0.972222 A:0.0277778  
chr28 10179926 2 32 A:0.96875 T:0.03125  
chr28 10180117 2 38 C:0.973684 T:0.0263158  
chr28 10180121 2 38 T:0.973684 C:0.0263158  
chr28 10180448 2 38 A:0.973684 AGAGAGAGAGAGC:  
0.0263158  
chr28 10180452 2 34 C:0.117647 T:0.882353  
chr28 10180559 2 38 A:0.0526316 G:0.947368  
chr28 10180810 2 32 T:0.96875 C:0.03125  
chr28 10180918 2 30 TA:0.966667 T:0.0333333  
chr28 10180948 2 36 T:0.972222 A:0.0277778  
chr28 10181070 2 38 A:0.973684 AT:0.0263158  
chr28 10181208 2 40 G:0.125 A:0.875  
chr28 10181272 2 40 A:1 C:0  
chr28 10181355 2 36 C:1 T:0  
chr28 10181433 2 38 T:1 C:0  
chr28 10181455 2 38 A:1 ATGCTGC:0  
chr28 10181479 2 36 CTTCTGTTT:0.972222 C:  
0.0277778  
chr28 10181484 2 38 G:0.921053 GT:0.0789474  
chr28 10181492 2 34 TTG:1 T:0  
chr28 10181494 2 36 G:0.222222 T:0.777778  
chr28 10181512 4 34 GTTT:0.147059 G:0.0294118  
GTTTT:0 TTTT:0.823529

|                                                                |          |   |    |                   |                    |              |
|----------------------------------------------------------------|----------|---|----|-------------------|--------------------|--------------|
| chr28                                                          | 10182245 | 2 | 40 | T:1               | C:0                |              |
| chr28                                                          | 10182413 | 2 | 36 | G:0.972222        |                    | T:0.0277778  |
| chr28                                                          | 10182486 | 2 | 38 | T:1               | C:0                |              |
| chr28                                                          | 10182646 | 2 | 38 | G:0.973684        |                    | A:0.0263158  |
| chr28                                                          | 10182848 | 4 | 36 | CT:0.138889       |                    | C:0.0277778  |
| CTT:0.694444 CTTT:0.138889                                     |          |   |    |                   |                    |              |
| chr28                                                          | 10183221 | 2 | 38 | G:0.973684        |                    | A:0.0263158  |
| chr28                                                          | 10183345 | 2 | 38 | TAGTC:0.973684    |                    | T:0.0263158  |
| chr28                                                          | 10183420 | 2 | 36 | T:0.972222        |                    | C:0.0277778  |
| chr28                                                          | 10183703 | 2 | 40 | G:0.975           | GTTTTTTTTTTT:0.025 |              |
| chr28                                                          | 10184034 | 2 | 28 | T:1               | TAA:0              |              |
| chr28                                                          | 10184066 | 2 | 30 | C:0.966667        |                    | CT:0.0333333 |
| chr28                                                          | 10184150 | 2 | 36 | A:0.444444        |                    | T:0.555556   |
| chr28                                                          | 10184152 | 2 | 36 | ATTTATTT:0.138889 |                    | A:           |
| 0.861111                                                       |          |   |    |                   |                    |              |
| chr28                                                          | 10184489 | 2 | 36 | A:0.111111        |                    | G:0.888889   |
| chr28                                                          | 10184650 | 2 | 40 |                   |                    |              |
| CCAAACTTTCTTTTTCTTTTTTTTTTTTTTTTTTTTTTTTTTTTTTTTTTTTTTTT:0 C:1 |          |   |    |                   |                    |              |
| chr28                                                          | 10184933 | 2 | 38 | T:1               | C:0                |              |
| chr28                                                          | 10185046 | 2 | 40 | TA:0.925          |                    | T:0.075      |
| chr28                                                          | 10185574 | 2 | 34 | C:1               | T:0                |              |
| chr28                                                          | 10185602 | 2 | 38 | T:1               | A:0                |              |
| chr28                                                          | 10185825 | 2 | 34 | G:1               | A:0                |              |
| chr28                                                          | 10186039 | 2 | 32 | A:0.90625         |                    | AT:0.09375   |
| chr28                                                          | 10186510 | 2 | 40 | G:0.85            | A:0.15             |              |
| chr28                                                          | 10187094 | 2 | 38 | TA:0.131579       |                    | T:0.868421   |
| chr28                                                          | 10187445 | 2 | 36 | AAAC:0.916667     |                    | A:0.0833333  |
| chr28                                                          | 10187515 | 2 | 36 | G:0.833333        |                    | A:0.166667   |
| chr28                                                          | 10187527 | 2 | 36 | G:0.194444        |                    | A:0.805556   |
| chr28                                                          | 10187572 | 2 | 34 | C:0.941176        |                    | A:0.0588235  |
| chr28                                                          | 10187573 | 2 | 34 | G:0.147059        |                    | A:0.852941   |
| chr28                                                          | 10187947 | 2 | 40 | G:0.875           |                    |              |
| GAAACATGTCCACACAAAAATGTGTTTAC:0.125                            |          |   |    |                   |                    |              |
| chr28                                                          | 10188244 | 2 | 36 | TC:1              | T:0                |              |
| chr28                                                          | 10188277 | 2 | 36 | C:0.833333        |                    | G:0.166667   |
| chr28                                                          | 10188361 | 2 | 40 | T:1               | TA:0               |              |
| chr28                                                          | 10188362 | 2 | 40 | T:0.725           | A:0.275            |              |
| chr28                                                          | 10188490 | 2 | 36 | C:0.888889        |                    | T:0.111111   |
| chr28                                                          | 10189517 | 2 | 28 | TC:0.285714       |                    | T:0.714286   |
| chr28                                                          | 10189654 | 2 | 34 | G:0.205882        |                    | C:0.794118   |
| chr28                                                          | 10189689 | 2 | 32 | C:0.1875          | T:0.8125           |              |
| chr28                                                          | 10189692 | 2 | 32 | T:0.90625         |                    | C:0.09375    |
| chr28                                                          | 10189913 | 2 | 32 | A:0.125           | G:0.875            |              |
| chr28                                                          | 10190601 | 2 | 36 | G:1               | A:0                |              |
| chr28                                                          | 10190834 | 2 | 38 | T:0.0526316       |                    | A:0.947368   |
| chr28                                                          | 10191435 | 2 | 38 | C:0.842105        |                    | G:0.157895   |
| chr28                                                          | 10191496 | 2 | 36 | A:0.888889        |                    | G:0.111111   |
| chr28                                                          | 10191911 | 2 | 34 | TA:0.205882       |                    | T:0.794118   |
| chr28                                                          | 10191933 | 2 | 34 | G:0.205882        |                    | A:0.794118   |
| chr28                                                          | 10192231 | 2 | 36 | C:1               | T:0                |              |
| chr28                                                          | 10192255 | 2 | 36 | C:0.916667        |                    | T:0.0833333  |
| chr28                                                          | 10192561 | 2 | 34 | A:0.970588        |                    | T:0.0294118  |
| chr28                                                          | 10192640 | 2 | 34 | T:0.117647        |                    | A:0.882353   |
| chr28                                                          | 10192664 | 2 | 32 | C:0.03125         |                    | G:0.96875    |

|       |                     |   |    |                       |                |
|-------|---------------------|---|----|-----------------------|----------------|
| chr28 | 10192898            | 2 | 22 | G:0.227273            | C:0.772727     |
| chr28 | 10194221            | 2 | 28 | T:0.214286            | C:0.785714     |
| chr28 | 10194540            | 3 | 28 | G:1 GTGC:0            | GTGCTGC:0      |
| chr28 | 10194740            | 2 | 30 | A:0.1 G:0.9           |                |
| chr28 | 10195054            | 2 | 34 | CTT:1 C:0             |                |
| chr28 | 10195593            | 2 | 38 | GTATT:0.684211        | G:0.315789     |
| chr28 | 10195621            | 3 | 38 | GT:0.289474           | G:0 GTTTTT:    |
|       | 0.710526            |   |    |                       |                |
| chr28 | 10196362            | 2 | 38 | A:0.921053            | G:0.0789474    |
| chr28 | 10196855            | 2 | 30 | CTT:1 C:0             |                |
| chr28 | 10196857            | 4 | 40 | TTTTTC:0.725          | T:0            |
|       | TTTTCTTTTC:0.275    |   |    | TTTTCTTTTC:0          |                |
| chr28 | 10196894            | 2 | 40 | T:1 TTTCTTTTTCTTTTC:0 |                |
| chr28 | 10196944            | 2 | 40 | C:1 CCTTT:0           |                |
| chr28 | 10196965            | 2 | 40 | CTTTCTTT:1            | C:0            |
| chr28 | 10196972            | 2 | 40 | T:0.8 TC:0.2          |                |
| chr28 | 10196985            | 2 | 40 | C:0.575 T:0.425       |                |
| chr28 | 10198571            | 2 | 36 | A:0.555556            | AAATT:0.444444 |
| chr28 | 10198572            | 2 | 38 | A:1 AATT:0            |                |
| chr28 | 10198658            | 4 | 38 | C:0.605263            | CATAA:0.315789 |
|       | CATAAATAA:0.0789474 |   |    | CATAAATAAATAA:0       |                |
| chr28 | 10199197            | 2 | 36 | C:0.472222            | T:0.527778     |
| chr28 | 10199651            | 2 | 40 | C:0.575 CT:0.425      |                |
| chr28 | 10199887            | 2 | 38 | TTTTA:1 T:0           |                |
| chr28 | 10201240            | 2 | 28 | CATTT:0 C:1           |                |
| chr28 | 10201918            | 2 | 38 | C:0.973684            | T:0.0263158    |
| chr28 | 10202452            | 2 | 36 | A:0 G:1               |                |
| chr28 | 10204117            | 2 | 36 | T:0 A:1               |                |
| chr28 | 10204662            | 2 | 38 | T:0.921053            | A:0.0789474    |
| chr28 | 10204694            | 2 | 32 | C:1 CAG:0             |                |
| chr28 | 10204858            | 2 | 38 | T:0.921053            | C:0.0789474    |
| chr28 | 10204975            | 2 | 40 | A:0.9 T:0.1           |                |
| chr28 | 10206008            | 2 | 32 | C:1 T:0               |                |
| chr28 | 10206285            | 3 | 38 | TA:0.763158           | T:0.210526     |
|       | TAA:0.0263158       |   |    |                       |                |
| chr28 | 10206466            | 2 | 36 | C:0 T:1               |                |
| chr28 | 10206866            | 2 | 24 | C:0.333333            | CA:0.666667    |
| chr28 | 10206960            | 2 | 34 | A:0.117647            | AT:0.882353    |
| chr28 | 10209139            | 2 | 24 | C:0.875 CT:0.125      |                |
| chr28 | 10209599            | 2 | 36 | C:0.666667            | T:0.333333     |
| chr28 | 10209824            | 2 | 36 | T:0.944444            | C:0.0555556    |
| chr28 | 10210027            | 2 | 34 | T:0.764706            | TA:0.235294    |
| chr28 | 10210545            | 2 | 36 | G:0.0833333           | C:0.916667     |
| chr28 | 10211524            | 2 | 32 | CAG:1 C:0             |                |
| chr28 | 10211592            | 2 | 34 | C:1 T:0               |                |
| chr28 | 10211945            | 2 | 38 | G:0.947368            | A:0.0526316    |
| chr28 | 10213084            | 2 | 38 | A:0.921053            | G:0.0789474    |
| chr28 | 10214082            | 2 | 34 | C:1 T:0               |                |
| chr28 | 10215146            | 2 | 36 | TAA:1 T:0             |                |
| chr28 | 10215148            | 2 | 36 | A:1 ATTTTTTTTTTTTT:0  |                |
| chr28 | 10215235            | 2 | 30 | A:0.0666667           | G:0.933333     |
| chr28 | 10215560            | 2 | 24 | A:1 C:0               |                |
| chr28 | 10215797            | 2 | 28 | CT:0.928571           | C:0.0714286    |
| chr28 | 10216136            | 2 | 38 | T:0.0789474           | G:0.921053     |

|       |          |   |    |                   |         |               |
|-------|----------|---|----|-------------------|---------|---------------|
| chr28 | 10216903 | 2 | 36 | TTTTA:1           | T:0     |               |
| chr28 | 10217303 | 2 | 36 | C:0.888889        |         | G:0.111111    |
| chr28 | 10217443 | 2 | 38 | T:1               | G:0     |               |
| chr28 | 10217656 | 2 | 34 | C:0.0294118       |         | T:0.970588    |
| chr28 | 10217667 | 2 | 34 | A:0               | T:1     |               |
| chr28 | 10217670 | 2 | 34 | A:0               | T:1     |               |
| chr28 | 10217684 | 2 | 30 | A:0               | G:1     |               |
| chr28 | 10217713 | 2 | 34 | G:0               | C:1     |               |
| chr28 | 10217717 | 2 | 34 | G:0               | C:1     |               |
| chr28 | 10217725 | 2 | 34 | G:0               | A:1     |               |
| chr28 | 10217727 | 2 | 34 | T:0               | C:1     |               |
| chr28 | 10217732 | 2 | 34 | TG:0              | T:1     |               |
| chr28 | 10217750 | 2 | 36 | G:0               | T:1     |               |
| chr28 | 10217757 | 2 | 36 | A:0               | G:1     |               |
| chr28 | 10217769 | 2 | 38 | C:0               | CA:1    |               |
| chr28 | 10217772 | 2 | 38 | G:0               | T:1     |               |
| chr28 | 10217773 | 2 | 38 | AT:0              | A:1     |               |
| chr28 | 10217776 | 2 | 38 | T:0               | C:1     |               |
| chr28 | 10217785 | 2 | 38 | G:0               | GC:1    |               |
| chr28 | 10217791 | 2 | 38 | TCTAG:0           | T:1     |               |
| chr28 | 10217796 | 2 | 38 | A:0               | ATC:1   |               |
| chr28 | 10217805 | 2 | 38 | A:0               | T:1     |               |
| chr28 | 10217814 | 2 | 38 | A:0               | C:1     |               |
| chr28 | 10217815 | 2 | 38 | C:0               | A:1     |               |
| chr28 | 10217816 | 2 | 38 | T:0               | G:1     |               |
| chr28 | 10217887 | 2 | 36 | G:0               | A:1     |               |
| chr28 | 10219877 | 2 | 36 | A:0.0555556       |         | G:0.944444    |
| chr28 | 10220208 | 2 | 34 | G:0               | GA:1    |               |
| chr28 | 10220401 | 2 | 38 | T:0.0789474       |         | TC:0.921053   |
| chr28 | 10220414 | 2 | 38 | A:0.973684        |         | T:0.0263158   |
| chr28 | 10220416 | 2 | 38 | A:0.0526316       |         | T:0.947368    |
| chr28 | 10220438 | 2 | 34 | G:0.941176        |         | GT:0.0588235  |
| chr28 | 10220523 | 2 | 40 | G:0.925           | A:0.075 |               |
| chr28 | 10220530 | 2 | 40 | G:1               | A:0     |               |
| chr28 | 10220819 | 2 | 38 | A:1               | T:0     |               |
| chr28 | 10220844 | 2 | 30 | T:0.133333        |         | C:0.866667    |
| chr28 | 10221024 | 2 | 36 | A:0               | G:1     |               |
| chr28 | 10221026 | 2 | 36 | A:0               | G:1     |               |
| chr28 | 10221031 | 2 | 36 | AG:0              | A:1     |               |
| chr28 | 10221051 | 2 | 36 | G:0               | A:1     |               |
| chr28 | 10221065 | 2 | 36 | A:0               | ATATT:1 |               |
| chr28 | 10221066 | 2 | 36 | AAGGG:0           | A:1     |               |
| chr28 | 10221075 | 2 | 36 | T:0               | A:1     |               |
| chr28 | 10221092 | 2 | 36 | GAA:0             | G:1     |               |
| chr28 | 10221094 | 2 | 36 | A:0               | ATTT:1  |               |
| chr28 | 10221096 | 2 | 36 | C:0               | CT:1    |               |
| chr28 | 10221102 | 2 | 36 | T:0               | TA:1    |               |
| chr28 | 10221130 | 2 | 36 | G:0               | T:1     |               |
| chr28 | 10221169 | 2 | 34 | A:0               | T:1     |               |
| chr28 | 10221188 | 2 | 34 | G:0               | T:1     |               |
| chr28 | 10221251 | 2 | 34 | C:0.970588        |         | CCT:0.0294118 |
| chr28 | 10221651 | 2 | 34 | C:1               | CT:0    |               |
| chr28 | 10221784 | 2 | 38 | TTTCTTTC:0.894737 |         | T:            |

0.105263

chr28 10221870 2 32 CTCTTTCTTTCTTTCTTTCTTTCTT:0.875  
C:0.125  
chr28 10222097 2 40  
TTCTTTCTTTCTTTCTTTCTTTCTCTCTCTCTC:0.075 T:0.925  
chr28 10225079 2 36 TCCC:0.916667 T:0.0833333  
chr28 10225082 2 36 C:0.0833333 T:0.916667  
chr28 10225086 2 30 A:1 ATTC:0  
chr28 10225154 2 36 G:1 A:0  
chr28 10226261 4 38 CAG:0.447368 C:0.0789474  
CAGAG:0.289474 CAGAGAG:0.184211  
chr28 10226865 2 40 A:1 C:0  
chr28 10227301 2 40 A:0.925 G:0.075  
chr28 10227734 3 24 C:0.291667 CT:0.5 CTT:  
0.208333  
chr28 10227822 2 32 AT:0.9375 A:0.0625  
chr28 10228493 2 38 TAAA:1 T:0  
chr28 10228498 2 38 A:1 T:0  
chr28 10228609 2 36 C:0.944444 T:0.0555556  
chr28 10229110 2 38 GA:0.842105 G:0.157895  
chr28 10229543 2 36 G:0.694444 GT:0.305556  
chr28 10229764 2 38 AT:0.0789474 A:0.921053  
chr28 10229828 2 34 C:0.205882 CT:0.794118  
chr28 10230082 2 34 C:0.970588 A:0.0294118  
chr28 10231615 2 40 G:1 C:0  
chr28 10231666 5 40 TTATCTATCTATCTATC:0.3 T:0.175  
TTATC:0.1 TTATCTATCTATC:0.15 TTATCTATCTATCTATC:  
0.275  
chr28 10232630 2 36 T:0 A:1  
chr28 10232644 2 36 ATTT:0 A:1  
chr28 10232649 2 36 T:0 TGG:1  
chr28 10232651 2 36 A:0 G:1  
chr28 10232653 2 36 GC:0 G:1  
chr28 10232658 2 36 A:0 G:1  
chr28 10232662 2 36 C:0 T:1  
chr28 10232681 2 36 C:0 A:1  
chr28 10232696 2 36 G:0 T:1  
chr28 10232705 2 36 C:0 A:1  
chr28 10232731 2 38 A:0 T:1  
chr28 10232738 2 38 T:0 A:1  
chr28 10232760 2 38 C:0 A:1  
chr28 10232886 2 38 GT:0.868421 G:0.131579  
chr28 10233249 2 36 T:0.916667 A:0.0833333  
chr28 10233584 2 36 CT:0.0833333 C:0.916667  
chr28 10233628 3 28 A:0.285714 AAG:0.642857  
AAGAG:0.0714286  
chr28 10234058 2 34 T:0.941176 A:0.0588235  
chr28 10234981 2 38 TA:1 T:0  
chr28 10236023 2 38 CTGATTGAT:0.973684 C:  
0.0263158  
chr28 10236871 2 34 C:0.941176 A:0.0588235  
chr28 10237348 3 38 T:0.236842 TTTTA:0.710526  
TTTTTATTTTA:0.0526316  
chr28 10237407 3 36 CAG:1 C:0 CAGAG:0  
chr28 10237409 2 32 G:0 C:1



|                        |          |   |    |              |               |      |
|------------------------|----------|---|----|--------------|---------------|------|
| chr28                  | 10237514 | 2 | 34 | G:0.0882353  | C:0.911765    |      |
| chr28                  | 10237537 | 2 | 34 | G:0.0882353  | A:0.911765    |      |
| chr28                  | 10239051 | 2 | 38 | AGT:1        | A:0           |      |
| chr28                  | 10239081 | 2 | 34 | T:0.0882353  | A:0.911765    |      |
| chr28                  | 10239174 | 2 | 34 | T:0.0882353  | A:0.911765    |      |
| chr28                  | 10241743 | 2 | 38 | C:0.894737   | T:0.105263    |      |
| chr28                  | 10241847 | 2 | 40 | A:0.95       | T:0.05        |      |
| chr28                  | 10241959 | 2 | 38 | C:0.657895   | T:0.342105    |      |
| chr28                  | 10242101 | 2 | 38 | A:0.0789474  | C:0.921053    |      |
| chr28                  | 10242211 | 2 | 38 | AT:0.131579  | A:0.868421    |      |
| chr28                  | 10243424 | 2 | 40 | T:1          | C:0           |      |
| chr28                  | 10243517 | 2 | 40 | A:0.925      | AAAAAC:0.075  |      |
| chr28                  | 10243960 | 2 | 38 | C:0.921053   | CCT:0.0789474 |      |
| chr28                  | 10244078 | 2 | 34 | T:0.911765   | G:0.0882353   |      |
| chr28                  | 10244190 | 2 | 36 | C:0.916667   | A:0.0833333   |      |
| chr28                  | 10244813 | 2 | 38 | A:0.0789474  | G:0.921053    |      |
| chr28                  | 10245114 | 3 | 30 | G:0.9        | GT:0.0666667  | GTT: |
| 0.0333333              |          |   |    |              |               |      |
| chr28                  | 10245632 | 2 | 34 | C:1          | T:0           |      |
| chr28                  | 10246538 | 2 | 36 | C:0.916667   | CT:0.0833333  |      |
| chr28                  | 10246807 | 3 | 30 | CTT:0.566667 | C:0.133333    |      |
| CTTT:0.3               |          |   |    |              |               |      |
| chr28                  | 10247331 | 2 | 30 | TA:0.133333  | T:0.866667    |      |
| chr28                  | 10247387 | 2 | 28 | TA:1         | T:0           |      |
| chr28                  | 10247592 | 2 | 24 | G:0.5        | GT:0.5        |      |
| chr28                  | 10247617 | 2 | 28 | C:0.321429   | CT:0.678571   |      |
| chr28                  | 10247886 | 2 | 36 | T:1          | C:0           |      |
| chr28                  | 10248273 | 2 | 34 | AC:1         | A:0           |      |
| chr28                  | 10248337 | 2 | 38 | T:1          | TGAGA:0       |      |
| chr28                  | 10250140 | 2 | 36 | A:0.111111   | G:0.888889    |      |
| chr28                  | 10250481 | 2 | 36 | CT:0.805556  | C:0.194444    |      |
| chr28                  | 10250920 | 2 | 36 | T:0.0833333  | C:0.916667    |      |
| chr28                  | 10251016 | 2 | 40 | T:1          | G:0           |      |
| chr28                  | 10252020 | 2 | 40 | G:0.95       | A:0.05        |      |
| chr28                  | 10254917 | 2 | 26 | TCA:1        | T:0           |      |
| chr28                  | 10254924 | 2 | 26 | C:0.884615   | G:0.115385    |      |
| chr28                  | 10255526 | 2 | 28 | G:0          | C:1           |      |
| chr28                  | 10255597 | 2 | 34 | C:0          | A:1           |      |
| chr28                  | 10255637 | 2 | 36 | G:0          | T:1           |      |
| chr28                  | 10255654 | 2 | 38 | T:0          | A:1           |      |
| chr28                  | 10255824 | 2 | 26 | CCT:0.269231 | C:0.730769    |      |
| chr28                  | 10256382 | 2 | 36 | C:0.0833333  | T:0.916667    |      |
| chr28                  | 10256928 | 2 | 36 | C:1          | CA:0          |      |
| chr28                  | 10257348 | 2 | 28 | G:0          | A:1           |      |
| chr28                  | 10257358 | 2 | 28 | G:0          | A:1           |      |
| chr28                  | 10258105 | 2 | 36 | CT:0.805556  | C:0.194444    |      |
| chr28                  | 10258193 | 2 | 30 | A:0          | G:1           |      |
| chr28                  | 10259148 | 2 | 26 | C:0.961538   | CAG:0.0384615 |      |
| chr28                  | 10259732 | 2 | 34 | T:1          | TA:0          |      |
| chr28                  | 10259775 | 3 | 36 | ATTTTAT:0.25 | A:0.722222    |      |
| ATTTTATTTTAT:0.0277778 |          |   |    |              |               |      |
| chr28                  | 10259839 | 2 | 28 | C:0.785714   | CAG:0.214286  |      |
| chr28                  | 10261339 | 2 | 36 | T:1          | A:0           |      |
| chr28                  | 10261340 | 2 | 36 | T:0.972222   | A:0.0277778   |      |

|                                                       |            |    |                                |
|-------------------------------------------------------|------------|----|--------------------------------|
| chr28                                                 | 10261358 2 | 32 | T:0.9375 A:0.0625              |
| chr28                                                 | 10263091 2 | 40 | T:0 A:1                        |
| chr28                                                 | 10263112 2 | 40 | AGACTGGGAG:0 A:1               |
| chr28                                                 | 10263138 2 | 32 | AAAACCAAAAAAAC:0.0625 A:0.9375 |
| chr28                                                 | 10263139 2 | 32 | AAACCAAAAAAAC:1 A:0            |
| chr28                                                 | 10263157 2 | 40 | T:0 A:1                        |
| chr28                                                 | 10263164 2 | 40 | C:0 A:1                        |
| chr28                                                 | 10263165 2 | 40 | C:0 T:1                        |
| chr28                                                 | 10263184 2 | 40 | C:0 T:1                        |
| chr28                                                 | 10263187 2 | 40 | G:0 T:1                        |
| chr28                                                 | 10263570 2 | 40 |                                |
| CCTTTTCCTTTTCCTTTTCCTTTTCCTTTTCCTTTTCCTTTTCCTTTTC:0.9 |            |    | C:0.1                          |
| chr28                                                 | 10263584 2 | 40 | TTTTCTTTTCTTTTCTTTC:1 T:0      |
| chr28                                                 | 10263600 2 | 40 | CTTT:1 C:0                     |
| chr28                                                 | 10263781 2 | 36 | GCCCCCC:0.0833333 G:           |
| 0.916667                                              |            |    |                                |
| chr28                                                 | 10263940 2 | 32 | G:0.1875 GTTTT:0.8125          |
| chr28                                                 | 10264356 2 | 32 | CT:0.84375 C:0.15625           |
| chr28                                                 | 10264459 2 | 32 | T:0.9375 A:0.0625              |
| chr28                                                 | 10264992 2 | 38 | C:1 G:0                        |
| chr28                                                 | 10265466 2 | 36 | T:0.888889 A:0.111111          |
| chr28                                                 | 10265470 2 | 36 | G:0.0833333 T:0.916667         |
| chr28                                                 | 10265967 2 | 38 | AT:0.0789474 A:0.921053        |
| chr28                                                 | 10265975 2 | 38 | T:0.0789474 A:0.921053         |
| chr28                                                 | 10266146 2 | 34 | G:1 GT:0                       |
| chr28                                                 | 10267018 2 | 36 | T:0.0833333 C:0.916667         |
| chr28                                                 | 10267050 2 | 38 | T:1 A:0                        |
| chr28                                                 | 10267748 2 | 38 | T:0.552632 A:0.447368          |
| chr28                                                 | 10269982 3 | 36 | A:0 T:0.888889 ATT:            |
| 0.111111                                              |            |    |                                |
| chr28                                                 | 10269988 2 | 36 | T:1 TTA:0                      |
| chr28                                                 | 10271879 2 | 38 | C:0.0789474 CT:0.921053        |
| chr28                                                 | 10272031 2 | 34 | C:0.970588 CT:0.0294118        |
| chr28                                                 | 10272409 2 | 32 | C:0.15625 CT:0.84375           |
| chr28                                                 | 10272452 2 | 34 | C:0.970588 CAG:0.0294118       |
| chr28                                                 | 10273279 2 | 34 | C:0.911765 T:0.0882353         |
| chr28                                                 | 10273590 2 | 40 | A:0 T:1                        |
| chr28                                                 | 10273628 2 | 40 | G:0 T:1                        |
| chr28                                                 | 10273855 2 | 34 | C:1 T:0                        |
| chr28                                                 | 10274988 2 | 38 | C:0.0789474 CT:0.921053        |
| chr28                                                 | 10275285 2 | 38 | G:0.0526316 A:0.947368         |
| chr28                                                 | 10275539 2 | 34 | A:0.970588 ATATG:0.0294118     |
| chr28                                                 | 10275577 2 | 40 | G:1 A:0                        |
| chr28                                                 | 10275764 2 | 34 | G:0.911765 A:0.0882353         |
| chr28                                                 | 10275837 2 | 36 | T:0.888889 A:0.111111          |
| chr28                                                 | 10277251 2 | 36 | C:0.111111 A:0.888889          |
| chr28                                                 | 10277361 2 | 38 | T:0.210526 TTTTGTG:0.789474    |
| chr28                                                 | 10277457 2 | 38 | CTG:0.210526 C:0.789474        |
| chr28                                                 | 10277913 2 | 40 | A:0.975 G:0.025                |
| chr28                                                 | 10278194 2 | 34 | T:0 A:1                        |
| chr28                                                 | 10278201 2 | 34 | C:0 G:1                        |
| chr28                                                 | 10278206 2 | 34 | G:0 T:1                        |
| chr28                                                 | 10278208 2 | 34 | C:0 T:1                        |
| chr28                                                 | 10278214 2 | 34 | TA:0 T:1                       |

|                   |          |   |                    |              |          |                 |  |
|-------------------|----------|---|--------------------|--------------|----------|-----------------|--|
| chr28             | 10278235 | 2 | 36                 | C:0          | A:1      |                 |  |
| chr28             | 10278245 | 2 | 36                 | T:0          | A:1      |                 |  |
| chr28             | 10278248 | 2 | 36                 | C:0          | T:1      |                 |  |
| chr28             | 10278252 | 2 | 36                 | T:0          | A:1      |                 |  |
| chr28             | 10278278 | 2 | 36                 | G:0          | T:1      |                 |  |
| chr28             | 10278281 | 2 | 36                 | A:0          | T:1      |                 |  |
| chr28             | 10278287 | 2 | 36                 | G:0          | T:1      |                 |  |
| chr28             | 10278347 | 2 | 38                 | G:0          | T:1      |                 |  |
| chr28             | 10278366 | 2 | 38                 | T:0          | TG:1     |                 |  |
| chr28             | 10278374 | 2 | 38                 | GA:0         | G:1      |                 |  |
| chr28             | 10278377 | 2 | 38                 | A:0          | T:1      |                 |  |
| chr28             | 10278380 | 2 | 38                 | C:0          | T:1      |                 |  |
| chr28             | 10278383 | 2 | 38                 | C:0          | T:1      |                 |  |
| chr28             | 10278384 | 2 | 38                 | G:0          | GT:1     |                 |  |
| chr28             | 10278389 | 2 | 38                 | A:0          | T:1      |                 |  |
| chr28             | 10278392 | 2 | 38                 | GA:0         | G:1      |                 |  |
| chr28             | 10278414 | 2 | 36                 | G:0          | T:1      |                 |  |
| chr28             | 10278426 | 2 | 38                 | A:0.105263   |          | AG:0.894737     |  |
| chr28             | 10278427 | 2 | 38                 | A:0.105263   |          | AT:0.894737     |  |
| chr28             | 10278429 | 2 | 38                 | C:0.105263   |          | T:0.894737      |  |
| chr28             | 10278431 | 2 | 38                 | T:0.105263   |          | TA:0.894737     |  |
| chr28             | 10278436 | 2 | 38                 | C:0.105263   |          | CA:0.894737     |  |
| chr28             | 10278862 | 5 | 38                 | T:0.894737   |          | TGAGA:0.0526316 |  |
| TGAGAGA:0.0526316 |          |   | TGAGAGAGA:0        |              |          | TGAGAGAGAGA:0   |  |
| chr28             | 10280142 | 2 | 40                 | C:0.05       | T:0.95   |                 |  |
| chr28             | 10282101 | 2 | 40                 | A:0.925      | C:0.075  |                 |  |
| chr28             | 10283438 | 4 | 40                 | TATTC:0.4    |          | T:0.125         |  |
| TATTCATTC:0.225   |          |   | TATTCATTCATTC:0.25 |              |          |                 |  |
| chr28             | 10283617 | 2 | 34                 | C:1          | T:0      |                 |  |
| chr28             | 10283905 | 4 | 36                 | TCACACA:0.75 |          | T:0.222222      |  |
| TCA:0             |          |   | TCACA:0.0277778    |              |          |                 |  |
| chr28             | 10284389 | 2 | 40                 | CT:0.9       | C:0.1    |                 |  |
| chr28             | 10284402 | 2 | 40                 | T:0.8        | A:0.2    |                 |  |
| chr28             | 10284429 | 2 | 36                 | C:0.861111   |          | CAG:0.138889    |  |
| chr28             | 10284649 | 2 | 36                 | T:0.972222   |          | G:0.0277778     |  |
| chr28             | 10286031 | 2 | 34                 | CT:0.794118  |          | C:0.205882      |  |
| chr28             | 10286311 | 2 | 30                 | T:1          | TA:0     |                 |  |
| chr28             | 10286602 | 2 | 6                  | TG:1         | T:0      |                 |  |
| chr28             | 10286866 | 2 | 36                 | A:1          | AT:0     |                 |  |
| chr28             | 10288118 | 2 | 40                 | C:0.925      | A:0.075  |                 |  |
| chr28             | 10289368 | 2 | 40                 | AAATG:0.1    |          | A:0.9           |  |
| chr28             | 10290222 | 2 | 40                 | C:0.925      | T:0.075  |                 |  |
| chr28             | 10291300 | 2 | 38                 | T:1          | A:0      |                 |  |
| chr28             | 10291599 | 2 | 40                 | T:0.925      | G:0.075  |                 |  |
| chr28             | 10292188 | 2 | 36                 | G:1          | GC:0     |                 |  |
| chr28             | 10292196 | 2 | 36                 | C:1          | A:0      |                 |  |
| chr28             | 10293113 | 2 | 34                 | A:0.294118   |          | AC:0.705882     |  |
| chr28             | 10293942 | 2 | 38                 | A:1          | G:0      |                 |  |
| chr28             | 10293975 | 2 | 38                 | CTG:0.947368 |          | C:0.0526316     |  |
| chr28             | 10295027 | 2 | 38                 | G:1          | T:0      |                 |  |
| chr28             | 10296691 | 2 | 38                 | C:0.921053   |          | A:0.0789474     |  |
| chr28             | 10297215 | 2 | 34                 | A:0.823529   |          | AT:0.176471     |  |
| chr28             | 10297228 | 2 | 32                 | A:0.375      | AT:0.625 |                 |  |
| chr28             | 10297234 | 2 | 34                 | T:0.823529   |          | TA:0.176471     |  |

|               |          |   |    |                      |                   |
|---------------|----------|---|----|----------------------|-------------------|
| chr28         | 10297242 | 2 | 34 | A:0.794118           | T:0.205882        |
| chr28         | 10297584 | 2 | 38 | T:1 G:0              |                   |
| chr28         | 10298321 | 2 | 36 | T:0.916667           | G:0.0833333       |
| chr28         | 10299018 | 2 | 38 | A:0.921053           | C:0.0789474       |
| chr28         | 10299242 | 2 | 36 | G:0.972222           | GTGATGA:0.0277778 |
| chr28         | 10299389 | 2 | 28 | AG:1 A:0             |                   |
| chr28         | 10299571 | 2 | 38 | CT:0.921053          | C:0.0789474       |
| chr28         | 10299671 | 2 | 36 | G:0.0833333          | A:0.916667        |
| chr28         | 10300921 | 2 | 38 | T:0.815789           | C:0.184211        |
| chr28         | 10303275 | 2 | 38 | T:1 TAATAATTAAATA:0  |                   |
| chr28         | 10303278 | 2 | 36 | TA:1 T:0             |                   |
| chr28         | 10303281 | 2 | 32 | A:0.96875            | T:0.03125         |
| chr28         | 10303282 | 2 | 36 | TAAA:1 T:0           |                   |
| chr28         | 10303322 | 2 | 36 | T:0.5 TAAATAAA:0.5   |                   |
| chr28         | 10305770 | 2 | 38 | GT:0.921053          | G:0.0789474       |
| chr28         | 10306110 | 2 | 40 | G:1 A:0              |                   |
| chr28         | 10306667 | 3 | 36 | G:0.888889           | GT:0.0277778      |
| GTT:0.0833333 |          |   |    |                      |                   |
| chr28         | 10308168 | 2 | 32 | CTTTG:0.90625        | C:0.09375         |
| chr28         | 10308216 | 2 | 28 | TA:0.642857          | T:0.357143        |
| chr28         | 10308710 | 2 | 34 | T:0.882353           | C:0.117647        |
| chr28         | 10309124 | 2 | 40 | T:1 TCTTCTCCTTCTC:0  |                   |
| chr28         | 10309226 | 2 | 36 | T:1 A:0              |                   |
| chr28         | 10309300 | 2 | 38 | G:0.105263           | A:0.894737        |
| chr28         | 10309586 | 2 | 36 | T:0.888889           | TTG:0.111111      |
| chr28         | 10309762 | 2 | 38 | C:0.973684           | T:0.0263158       |
| chr28         | 10314496 | 2 | 34 | AG:0.911765          | A:0.0882353       |
| chr28         | 10318186 | 2 | 32 | T:0.90625            | G:0.09375         |
| chr28         | 10320740 | 2 | 40 | C:0.95 T:0.05        |                   |
| chr28         | 10322045 | 2 | 38 | T:0.684211           | A:0.315789        |
| chr28         | 10322857 | 2 | 36 | G:0.972222           | A:0.0277778       |
| chr28         | 10323774 | 2 | 40 | A:0.95 G:0.05        |                   |
| chr28         | 10324368 | 2 | 36 | TAC:0.861111         | T:0.138889        |
| chr28         | 10326115 | 2 | 36 | A:0.0833333          | T:0.916667        |
| chr28         | 10326851 | 2 | 30 | T:0.933333           | TA:0.0666667      |
| chr28         | 10327782 | 2 | 38 | TA:0.0789474         | T:0.921053        |
| chr28         | 10328178 | 2 | 38 | AG:0.789474          | A:0.210526        |
| chr28         | 10328491 | 2 | 34 | C:0.970588           | CCTCT:0.0294118   |
| chr28         | 10329049 | 3 | 36 | TA:0.416667          | T:0 TAA:          |
| 0.583333      |          |   |    |                      |                   |
| chr28         | 10330111 | 2 | 36 | G:0.916667           | A:0.0833333       |
| chr28         | 10330709 | 2 | 26 | G:0 T:1              |                   |
| chr28         | 10330904 | 2 | 32 | TA:0.09375           | T:0.90625         |
| chr28         | 10331042 | 2 | 38 | A:1 T:0              |                   |
| chr28         | 10331876 | 2 | 38 | G:0.842105           | A:0.157895        |
| chr28         | 10333265 | 2 | 36 | C:0.0833333          | T:0.916667        |
| chr28         | 10333520 | 2 | 34 | G:0.0882353          | A:0.911765        |
| chr28         | 10335857 | 2 | 38 | G:1 A:0              |                   |
| chr28         | 10336123 | 2 | 40 | CTTTG:0.225          | C:0.775           |
| chr28         | 10336126 | 2 | 40 | T:0.8 G:0.2          |                   |
| chr28         | 10336127 | 2 | 40 | G:0.8 T:0.2          |                   |
| chr28         | 10337878 | 2 | 38 | TTAGCTGCATG:0.894737 | T:                |
| 0.105263      |          |   |    |                      |                   |
| chr28         | 10338084 | 2 | 38 | A:0.210526           | AT:0.789474       |

|               |          |   |    |                |                 |         |
|---------------|----------|---|----|----------------|-----------------|---------|
| chr28         | 10338969 | 2 | 40 | A:0.175        | G:0.825         |         |
| chr28         | 10342121 | 2 | 38 | C:1            | G:0             |         |
| chr28         | 10345207 | 2 | 36 | G:0.833333     | T:0.166667      |         |
| chr28         | 10346971 | 2 | 32 | A:0.21875      | AT:0.78125      |         |
| chr28         | 10346982 | 2 | 36 | AT:1           | A:0             |         |
| chr28         | 10346991 | 2 | 36 | T:1            | A:0             |         |
| chr28         | 10347370 | 2 | 38 | G:1            | T:0             |         |
| chr28         | 10347881 | 2 | 34 | T:0.147059     | C:0.852941      |         |
| chr28         | 10348188 | 2 | 34 | G:0.882353     | A:0.117647      |         |
| chr28         | 10348754 | 2 | 38 | T:0            | C:1             |         |
| chr28         | 10350541 | 2 | 38 | C:1            | T:0             |         |
| chr28         | 10352784 | 2 | 36 | T:0.166667     | G:0.833333      |         |
| chr28         | 10353339 | 2 | 24 | C:0.25         | T:0.75          |         |
| chr28         | 10353730 | 2 | 36 | C:1            | A:0             |         |
| chr28         | 10353892 | 2 | 32 | C:0.96875      | T:0.03125       |         |
| chr28         | 10354223 | 2 | 34 | T:0.294118     | C:0.705882      |         |
| chr28         | 10354372 | 2 | 34 | G:0.205882     | GC:0.794118     |         |
| chr28         | 10354374 | 2 | 34 | G:0.205882     | T:0.794118      |         |
| chr28         | 10354908 | 2 | 38 | C:1            | T:0             |         |
| chr28         | 10355356 | 2 | 34 | C:0.823529     | CA:0.176471     |         |
| chr28         | 10355921 | 2 | 38 | A:0.789474     | G:0.210526      |         |
| chr28         | 10356475 | 2 | 28 | TG:0.75        | T:0.25          |         |
| chr28         | 10357042 | 2 | 34 | T:0.264706     | C:0.735294      |         |
| chr28         | 10358217 | 2 | 24 | TA:0.833333    | T:0.166667      |         |
| chr28         | 10358632 | 2 | 38 | C:0.815789     | A:0.184211      |         |
| chr28         | 10358988 | 2 | 36 | G:1            | A:0             |         |
| chr28         | 10359688 | 2 | 40 | C:1            | T:0             |         |
| chr28         | 10360705 | 2 | 36 | T:0            | A:1             |         |
| chr28         | 10360707 | 2 | 36 | A:0            | AT:1            |         |
| chr28         | 10360711 | 2 | 36 | G:0            | T:1             |         |
| chr28         | 10360718 | 2 | 36 | A:0            | AT:1            |         |
| chr28         | 10360739 | 2 | 34 | T:0            | G:1             |         |
| chr28         | 10360895 | 2 | 38 | A:0.868421     | G:0.131579      |         |
| chr28         | 10361065 | 2 | 36 | G:0.75         | A:0.25          |         |
| chr28         | 10361098 | 2 | 34 | T:0.794118     | C:0.205882      |         |
| chr28         | 10362366 | 2 | 36 | C:0.805556     | G:0.194444      |         |
| chr28         | 10363075 | 3 | 36 | ATG:1          | A:0             | ATGTG:0 |
| chr28         | 10363085 | 2 | 36 | G:0.972222     | GTA:0.0277778   |         |
| chr28         | 10363087 | 4 | 36 | G:0.805556     | A:0.0277778     |         |
| GTA:0.0277778 |          |   |    | GTATA:0.138889 |                 |         |
| chr28         | 10363501 | 2 | 38 | C:1            | T:0             |         |
| chr28         | 10363642 | 2 | 34 | G:0.794118     | A:0.205882      |         |
| chr28         | 10363714 | 2 | 38 | G:0.263158     | C:0.736842      |         |
| chr28         | 10363864 | 2 | 30 | T:0.866667     | C:0.133333      |         |
| chr28         | 10364030 | 2 | 38 | G:0.131579     | C:0.868421      |         |
| chr28         | 10364043 | 2 | 38 | G:0.894737     | A:0.105263      |         |
| chr28         | 10365147 | 2 | 30 | G:0.133333     | A:0.866667      |         |
| chr28         | 10365157 | 2 | 30 | A:0.966667     | C:0.0333333     |         |
| chr28         | 10365235 | 2 | 36 | G:0.194444     | GAACGCTGCAGCCC: |         |
| 0.805556      |          |   |    |                |                 |         |
| chr28         | 10365596 | 2 | 36 | G:0.25         | A:0.75          |         |
| chr28         | 10365841 | 2 | 36 | CGG:0.861111   | C:0.138889      |         |
| chr28         | 10365890 | 2 | 34 | T:0.823529     | C:0.176471      |         |
| chr28         | 10366396 | 2 | 38 | C:0.657895     | T:0.342105      |         |

|       |            |   |    |                                 |              |
|-------|------------|---|----|---------------------------------|--------------|
| chr28 | 10366452   | 2 | 38 | C:0.631579                      | T:0.368421   |
| chr28 | 10366773   | 2 | 32 | G:1                             | A:0          |
| chr28 | 10366873   | 2 | 32 | G:0.71875                       | A:0.28125    |
| chr28 | 10367446   | 2 | 40 | CCG:0.425                       | C:0.575      |
| chr28 | 10367453   | 2 | 40 | C:0.425                         | CACACA:0.575 |
| chr28 | 10367644   | 2 | 32 | C:0.25                          | T:0.75       |
| chr28 | 10367688   | 2 | 34 | G:0                             | C:1          |
| chr28 | 10367732   | 2 | 34 | G:0.823529                      | T:0.176471   |
| chr28 | 10368120   | 2 | 36 | T:0.722222                      | C:0.277778   |
| chr28 | 10369407   | 2 | 30 | A:1                             | AGT:0        |
| chr28 | 10370816   | 2 | 36 | G:0                             | A:1          |
| chr28 | 10370817   | 2 | 36 | A:0                             | T:1          |
| chr28 | 10370858   | 2 | 36 | T:0                             | C:1          |
| chr28 | 10370865   | 2 | 36 | C:0                             | G:1          |
| chr28 | 10370866   | 2 | 36 | TCCCC:0                         | T:1          |
| chr28 | 10370872   | 2 | 36 | C:0                             | CTATG:1      |
| chr28 | 10370927   | 2 | 30 | T:0                             | TA:1         |
| chr28 | 10374078   | 2 | 40 | C:0.1                           | T:0.9        |
| chr28 | 10377572   | 2 | 32 | C:1                             | T:0          |
| chr28 | 10378750   | 2 | 28 | A:1                             | G:0          |
| chr28 | 10378769   | 2 | 34 | G:1                             | A:0          |
| chr28 | 10379163   | 2 | 28 | C:1                             | T:0          |
| chr28 | 10379774   | 2 | 34 | G:1                             | C:0          |
| chr28 | 10379827   | 2 | 34 | T:1                             | C:0          |
| chr28 | 10379987   | 2 | 36 | A:1                             | G:0          |
| chr28 | 10380811   | 2 | 40 | C:1                             | A:0          |
| chr28 | 10381643   | 2 | 30 | A:1                             | G:0          |
| chr28 | 10381703   | 2 | 26 | C:0.961538                      | T:0.0384615  |
| chr28 | 10381792   | 2 | 30 | G:1                             | A:0          |
| chr28 | 10381872   | 2 | 38 | TCC:0.815789                    | T:0.184211   |
| chr28 | 10381875   | 2 | 38 | TCTCCTCTCCTCCTCCCCTCCC:0.815789 |              |
|       | T:0.184211 |   |    |                                 |              |
| chr28 | 10382353   | 2 | 36 | C:1                             | G:0          |
| chr28 | 10382580   | 2 | 38 | C:0.263158                      | T:0.736842   |
| chr28 | 10383052   | 2 | 38 | A:1                             | T:0          |
| chr28 | 10383887   | 2 | 34 | A:1                             | G:0          |
| chr28 | 10384028   | 2 | 38 | A:1                             | G:0          |
| chr28 | 10384349   | 2 | 38 | C:1                             | T:0          |
| chr28 | 10384687   | 2 | 38 | T:1                             | C:0          |
| chr28 | 10385385   | 2 | 36 | G:0                             | C:1          |
| chr28 | 10385825   | 2 | 38 | G:1                             | A:0          |
| chr28 | 10385939   | 2 | 40 | A:1                             | G:0          |
| chr28 | 10385971   | 2 | 34 | G:1                             | GA:0         |
| chr28 | 10385974   | 2 | 34 | G:1                             | A:0          |
| chr28 | 10386297   | 2 | 36 | T:1                             | C:0          |
| chr28 | 10386315   | 2 | 36 | G:1                             | C:0          |
| chr28 | 10386328   | 2 | 32 | A:1                             | G:0          |
| chr28 | 10386501   | 2 | 32 | G:1                             | GA:0         |
| chr28 | 10386609   | 2 | 34 | A:1                             | T:0          |
| chr28 | 10386908   | 2 | 36 | C:1                             | T:0          |
| chr28 | 10386918   | 2 | 36 | T:1                             | A:0          |
| chr28 | 10387323   | 2 | 40 | C:1                             | T:0          |
| chr28 | 10387401   | 2 | 36 | G:1                             | A:0          |
| chr28 | 10387594   | 2 | 34 | T:1                             | C:0          |

|                |          |   |    |            |             |              |
|----------------|----------|---|----|------------|-------------|--------------|
| chr28          | 10387806 | 2 | 22 | A:1        | G:0         |              |
| chr28          | 10388313 | 2 | 32 | T:1        | C:0         |              |
| chr28          | 10388466 | 2 | 40 | TG:1       | T:0         |              |
| chr28          | 10388628 | 2 | 38 | T:1        | TA:0        |              |
| chr28          | 10388841 | 2 | 34 | A:1        | G:0         |              |
| chr28          | 10389161 | 2 | 24 | C:1        | T:0         |              |
| chr28          | 10389928 | 2 | 34 | A:1        | ATTTTCATT:0 |              |
| chr28          | 10390280 | 2 | 36 | C:1        | T:0         |              |
| chr28          | 10390562 | 2 | 36 | A:1        | C:0         |              |
| chr28          | 10390574 | 2 | 38 | T:1        | C:0         |              |
| chr28          | 10391260 | 2 | 36 | CA:0       | C:1         |              |
| chr28          | 10391476 | 2 | 36 | G:1        | C:0         |              |
| chr28          | 10391557 | 2 | 38 | C:1        | T:0         |              |
| chr28          | 10391721 | 2 | 32 | G:1        | A:0         |              |
| chr28          | 10391895 | 2 | 34 | C:1        | T:0         |              |
| chr28          | 10392035 | 2 | 34 | C:1        | T:0         |              |
| chr28          | 10392085 | 2 | 38 | G:0.631579 |             | T:0.368421   |
| chr28          | 10392319 | 2 | 36 | CG:0       | C:1         |              |
| chr28          | 10392365 | 2 | 34 | G:1        | A:0         |              |
| chr28          | 10392446 | 2 | 40 | T:1        | C:0         |              |
| chr28          | 10392796 | 2 | 26 | T:1        | C:0         |              |
| chr28          | 10392902 | 2 | 32 | A:1        | G:0         |              |
| chr28          | 10393550 | 2 | 32 | C:1        | G:0         |              |
| chr28          | 10393652 | 2 | 32 | G:1        | GC:0        |              |
| chr28          | 10393861 | 2 | 36 | C:1        | T:0         |              |
| chr28          | 10394024 | 2 | 32 | T:1        | C:0         |              |
| chr28          | 10394271 | 2 | 36 | AT:1       | A:0         |              |
| chr28          | 10394288 | 2 | 36 | C:0.972222 |             | A:0.0277778  |
| chr28          | 10394868 | 2 | 38 | G:1        | A:0         |              |
| chr28          | 10394921 | 2 | 36 | G:1        | T:0         |              |
| chr28          | 10395152 | 2 | 36 | G:1        | A:0         |              |
| chr28          | 10395369 | 2 | 34 | G:1        | C:0         |              |
| chr28          | 10395401 | 2 | 32 | T:1        | TA:0        |              |
| chr28          | 10395424 | 2 | 32 | C:1        | CA:0        |              |
| chr28          | 10395599 | 2 | 38 | G:1        | T:0         |              |
| chr28          | 10395865 | 2 | 38 | A:0        | T:1         |              |
| chr28          | 10395870 | 2 | 36 | C:1        | T:0         |              |
| chr28          | 10395873 | 2 | 38 | C:0        | A:1         |              |
| chr28          | 10395874 | 2 | 38 | A:0        | T:1         |              |
| chr28          | 10395884 | 2 | 36 | G:1        | A:0         |              |
| chr28          | 10396284 | 3 | 34 | A:0.323529 |             | AG:0.0294118 |
| AAGAG:0.647059 |          |   |    |            |             |              |
| chr28          | 10396416 | 2 | 30 | G:1        | C:0         |              |
| chr28          | 10396706 | 2 | 28 | C:0        | A:1         |              |
| chr28          | 10396711 | 2 | 32 | T:1        | A:0         |              |
| chr28          | 10396728 | 2 | 32 | A:0.96875  |             | T:0.03125    |
| chr28          | 10397205 | 2 | 36 | T:1        | C:0         |              |
| chr28          | 10397433 | 2 | 38 | T:1        | C:0         |              |
| chr28          | 10397476 | 2 | 38 | T:1        | G:0         |              |
| chr28          | 10397487 | 2 | 36 | G:1        | A:0         |              |
| chr28          | 10397646 | 2 | 34 | GC:1       | G:0         |              |
| chr28          | 10397753 | 2 | 38 | A:1        | C:0         |              |
| chr28          | 10398029 | 2 | 40 | C:1        | T:0         |              |
| chr28          | 10398460 | 2 | 36 | T:1        | C:0         |              |

|       |          |   |    |                        |                |  |
|-------|----------|---|----|------------------------|----------------|--|
| chr28 | 10398873 | 2 | 34 | C:1                    | T:0            |  |
| chr28 | 10399254 | 2 | 36 | G:1                    | A:0            |  |
| chr28 | 10399272 | 2 | 40 | A:1                    | AGGAGGAGCAGG:0 |  |
| chr28 | 10399274 | 2 | 40 | CCA:1                  | C:0            |  |
| chr28 | 10399850 | 2 | 40 | C:1                    | G:0            |  |
| chr28 | 10400340 | 2 | 40 | C:1                    | T:0            |  |
| chr28 | 10400437 | 2 | 34 | G:1                    | A:0            |  |
| chr28 | 10400982 | 2 | 36 | T:1                    | C:0            |  |
| chr28 | 10401034 | 2 | 34 | T:1                    | C:0            |  |
| chr28 | 10401176 | 2 | 34 | A:1                    | T:0            |  |
| chr28 | 10401361 | 2 | 36 | A:1                    | G:0            |  |
| chr28 | 10401442 | 2 | 36 | C:1                    | T:0            |  |
| chr28 | 10401785 | 2 | 40 | C:1                    | T:0            |  |
| chr28 | 10401793 | 2 | 40 | G:1                    | A:0            |  |
| chr28 | 10402031 | 2 | 34 | G:1                    | A:0            |  |
| chr28 | 10402078 | 2 | 32 | T:1                    | C:0            |  |
| chr28 | 10402969 | 2 | 34 | C:1                    | T:0            |  |
| chr28 | 10403312 | 2 | 36 | A:1                    | C:0            |  |
| chr28 | 10403318 | 2 | 36 | G:1                    | A:0            |  |
| chr28 | 10403424 | 2 | 38 | C:1                    | T:0            |  |
| chr28 | 10403627 | 2 | 36 | T:1                    | G:0            |  |
| chr28 | 10403866 | 2 | 38 | T:0                    | C:1            |  |
| chr28 | 10403925 | 2 | 36 | A:1                    | G:0            |  |
| chr28 | 10404228 | 2 | 34 | A:1                    | G:0            |  |
| chr28 | 10404455 | 2 | 26 | G:0                    | GT:1           |  |
| chr28 | 10404475 | 2 | 26 | T:0                    | TA:1           |  |
| chr28 | 10404477 | 2 | 26 | GA:0                   | G:1            |  |
| chr28 | 10404483 | 2 | 26 | AC:0                   | A:1            |  |
| chr28 | 10404523 | 2 | 32 | C:0.40625              | CT:0.59375     |  |
| chr28 | 10404526 | 2 | 32 | A:0.40625              | G:0.59375      |  |
| chr28 | 10404528 | 2 | 32 | A:0.40625              | G:0.59375      |  |
| chr28 | 10404530 | 2 | 32 | CG:0.40625             | C:0.59375      |  |
| chr28 | 10404532 | 2 | 32 | CG:0.40625             | C:0.59375      |  |
| chr28 | 10404536 | 2 | 32 | C:0.40625              | A:0.59375      |  |
| chr28 | 10404538 | 2 | 32 | C:0.40625              | A:0.59375      |  |
| chr28 | 10404550 | 2 | 32 | CCCCCCCCCTCCCG:0.40625 | C:0.59375      |  |
| chr28 | 10404948 | 2 | 40 | T:1                    | C:0            |  |
| chr28 | 10405303 | 2 | 40 | T:1                    | C:0            |  |
| chr28 | 10405445 | 2 | 36 | G:0.555556             | A:0.444444     |  |
| chr28 | 10405479 | 2 | 36 | T:0                    | TG:1           |  |
| chr28 | 10405525 | 2 | 36 | G:0                    | GT:1           |  |
| chr28 | 10405526 | 2 | 36 | A:0                    | G:1            |  |
| chr28 | 10405552 | 2 | 36 | A:0                    | AT:1           |  |
| chr28 | 10405745 | 2 | 34 | T:1                    | C:0            |  |
| chr28 | 10405770 | 2 | 36 | G:1                    | A:0            |  |
| chr28 | 10405847 | 2 | 36 | G:1                    | A:0            |  |
| chr28 | 10406752 | 2 | 34 | C:0.882353             | T:0.117647     |  |
| chr28 | 10407069 | 2 | 40 | G:1                    | A:0            |  |
| chr28 | 10407082 | 2 | 40 | G:1                    | A:0            |  |
| chr28 | 10407326 | 2 | 38 | A:0.973684             | AT:0.0263158   |  |
| chr28 | 10407690 | 2 | 38 | T:1                    | C:0            |  |
| chr28 | 10407941 | 2 | 40 | G:1                    | A:0            |  |
| chr28 | 10407944 | 2 | 40 | A:1                    | G:0            |  |



|                    |          |   |    |                        |         |                 |
|--------------------|----------|---|----|------------------------|---------|-----------------|
| chr28              | 10408200 | 2 | 40 | T:1                    | C:0     |                 |
| chr28              | 10408224 | 2 | 40 | G:1                    | A:0     |                 |
| chr28              | 10408225 | 2 | 40 | C:0.975                | A:0.025 |                 |
| chr28              | 10408264 | 2 | 40 | A:0.95                 | C:0.05  |                 |
| chr28              | 10408297 | 2 | 38 | G:1                    | A:0     |                 |
| chr28              | 10408306 | 2 | 38 | C:1                    | T:0     |                 |
| chr28              | 10409581 | 2 | 38 | C:1                    | T:0     |                 |
| chr28              | 10409893 | 3 | 30 | CCTCT:0.8              |         | C:0.0333333     |
| CCT:0.166667       |          |   |    |                        |         |                 |
| chr28              | 10410057 | 2 | 38 | G:1                    | A:0     |                 |
| chr28              | 10410061 | 2 | 38 | T:1                    | C:0     |                 |
| chr28              | 10410483 | 2 | 36 | T:1                    | C:0     |                 |
| chr28              | 10410673 | 2 | 32 | C:1                    | A:0     |                 |
| chr28              | 10410775 | 2 | 38 | GACT:0.973684          |         | G:0.0263158     |
| chr28              | 10410995 | 2 | 36 | A:1                    | T:0     |                 |
| chr28              | 10411027 | 2 | 34 | G:1                    | A:0     |                 |
| chr28              | 10411592 | 2 | 36 | C:0.944444             |         | CT:0.0555556    |
| chr28              | 10411745 | 2 | 32 | C:1                    | T:0     |                 |
| chr28              | 10411760 | 2 | 32 | A:1                    | C:0     |                 |
| chr28              | 10411798 | 2 | 36 | C:1                    | T:0     |                 |
| chr28              | 10411853 | 2 | 36 | T:1                    | A:0     |                 |
| chr28              | 10412125 | 2 | 36 | T:1                    | C:0     |                 |
| chr28              | 10412330 | 2 | 36 | A:1                    | G:0     |                 |
| chr28              | 10412347 | 2 | 36 | G:1                    | A:0     |                 |
| chr28              | 10412552 | 2 | 40 | C:0.975                | T:0.025 |                 |
| chr28              | 10412857 | 2 | 36 | T:1                    | TC:0    |                 |
| chr28              | 10413499 | 2 | 38 | C:1                    | CG:0    |                 |
| chr28              | 10413599 | 2 | 36 | C:1                    | A:0     |                 |
| chr28              | 10413685 | 2 | 38 | A:1                    | G:0     |                 |
| chr28              | 10414238 | 2 | 32 | C:1                    | CT:0    |                 |
| chr28              | 10414470 | 2 | 32 | T:1                    | C:0     |                 |
| chr28              | 10414517 | 2 | 34 | G:1                    | A:0     |                 |
| chr28              | 10414527 | 2 | 34 | C:1                    | T:0     |                 |
| chr28              | 10415601 | 2 | 34 | AAAAAT:1               | A:0     |                 |
| chr28              | 10415621 | 2 | 36 | TAAAATAAATA:0.972222   |         | T:              |
| 0.0277778          |          |   |    |                        |         |                 |
| chr28              | 10415626 | 2 | 38 | T:0.894737             |         | TAAATA:0.105263 |
| chr28              | 10417377 | 3 | 36 | CGAGAGAGAGAGA:0.777778 |         | C:              |
| 0.222222 CGAGAGA:0 |          |   |    |                        |         |                 |
| chr28              | 10417383 | 2 | 38 | A:1                    | ATC:0   |                 |
| chr28              | 10417945 | 2 | 34 | G:1                    | A:0     |                 |
| chr28              | 10418020 | 2 | 34 | C:0.941176             |         | A:0.0588235     |
| chr28              | 10418409 | 2 | 32 | C:1                    | T:0     |                 |
| chr28              | 10418813 | 3 | 38 | CAT:0.736842           |         | C:0 CATAT:      |
| 0.263158           |          |   |    |                        |         |                 |
| chr28              | 10418846 | 2 | 36 | T:0.972222             |         | A:0.0277778     |
| chr28              | 10418874 | 2 | 36 | G:0.972222             |         | GTGTATATA:      |
| 0.0277778          |          |   |    |                        |         |                 |
| chr28              | 10419697 | 2 | 38 | A:1                    | C:0     |                 |
| chr28              | 10419784 | 2 | 36 | T:0.888889             |         | TA:0.111111     |
| chr28              | 10420261 | 2 | 40 | T:1                    | C:0     |                 |
| chr28              | 10420334 | 2 | 40 | T:1                    | C:0     |                 |
| chr28              | 10420397 | 2 | 40 | G:1                    | T:0     |                 |
| chr28              | 10420564 | 2 | 36 | T:1                    | C:0     |                 |

|       |          |   |    |                      |       |              |
|-------|----------|---|----|----------------------|-------|--------------|
| chr28 | 10420766 | 2 | 38 | A:1                  | G:0   |              |
| chr28 | 10420781 | 2 | 38 | A:1                  | G:0   |              |
| chr28 | 10421296 | 2 | 38 | T:1                  | G:0   |              |
| chr28 | 10421541 | 2 | 38 | T:1                  | C:0   |              |
| chr28 | 10421665 | 2 | 36 | A:1                  | G:0   |              |
| chr28 | 10422136 | 2 | 38 | T:1                  | TA:0  |              |
| chr28 | 10423036 | 2 | 38 | A:1                  | G:0   |              |
| chr28 | 10423544 | 2 | 40 | C:1                  | T:0   |              |
| chr28 | 10423594 | 2 | 38 | G:1                  | C:0   |              |
| chr28 | 10423598 | 2 | 38 | A:1                  | C:0   |              |
| chr28 | 10423967 | 2 | 38 | C:1                  | T:0   |              |
| chr28 | 10424083 | 2 | 36 | A:1                  | G:0   |              |
| chr28 | 10424214 | 2 | 40 | C:1                  | T:0   |              |
| chr28 | 10424321 | 2 | 38 | T:1                  | TG:0  |              |
| chr28 | 10424506 | 2 | 40 | C:1                  | T:0   |              |
| chr28 | 10424645 | 2 | 40 | A:1                  | C:0   |              |
| chr28 | 10424808 | 2 | 40 | G:1                  | A:0   |              |
| chr28 | 10424814 | 2 | 40 | A:1                  | G:0   |              |
| chr28 | 10424852 | 2 | 38 | C:1                  | CT:0  |              |
| chr28 | 10424875 | 2 | 40 | A:1                  | G:0   |              |
| chr28 | 10425041 | 2 | 36 | CGTGTGT:0.805556     |       | C:0.194444   |
| chr28 | 10425511 | 2 | 36 | G:1                  | A:0   |              |
| chr28 | 10425606 | 2 | 36 | T:1                  | C:0   |              |
| chr28 | 10425839 | 2 | 36 | T:1                  | A:0   |              |
| chr28 | 10425952 | 2 | 36 | C:1                  | T:0   |              |
| chr28 | 10427022 | 2 | 40 | GC:1                 | G:0   |              |
| chr28 | 10427176 | 2 | 34 | G:1                  | A:0   |              |
| chr28 | 10427759 | 2 | 34 | G:1                  | A:0   |              |
| chr28 | 10427979 | 2 | 38 | C:1                  | T:0   |              |
| chr28 | 10428209 | 2 | 38 | C:1                  | G:0   |              |
| chr28 | 10428504 | 2 | 38 | A:1                  | G:0   |              |
| chr28 | 10428822 | 2 | 28 | AT:0.642857          |       | A:0.357143   |
| chr28 | 10428863 | 2 | 34 | G:1                  | A:0   |              |
| chr28 | 10429206 | 2 | 38 | C:1                  | A:0   |              |
| chr28 | 10429290 | 2 | 38 | T:1                  | C:0   |              |
| chr28 | 10429814 | 2 | 38 | TC:1                 | T:0   |              |
| chr28 | 10430037 | 2 | 34 | C:1                  | T:0   |              |
| chr28 | 10430172 | 2 | 36 | C:1                  | T:0   |              |
| chr28 | 10431042 | 2 | 30 | C:0.933333           |       | CT:0.0666667 |
| chr28 | 10431233 | 2 | 32 | G:1                  | A:0   |              |
| chr28 | 10431502 | 2 | 38 | T:1                  | C:0   |              |
| chr28 | 10432230 | 2 | 28 | G:1                  | T:0   |              |
| chr28 | 10432245 | 2 | 30 | G:1                  | A:0   |              |
| chr28 | 10432448 | 2 | 36 | T:1                  | A:0   |              |
| chr28 | 10432673 | 2 | 36 | C:0.972222           |       | T:0.0277778  |
| chr28 | 10433001 | 2 | 24 | AGAGAGAGGAG:0.958333 |       | A:0.0416667  |
| chr28 | 10433005 | 2 | 24 | AGAGGAG:0.833333     |       | A:0.166667   |
| chr28 | 10433007 | 2 | 24 | AGGAG:0.25           |       | A:0.75       |
| chr28 | 10434312 | 2 | 34 | A:1                  | G:0   |              |
| chr28 | 10436203 | 2 | 36 | C:1                  | G:0   |              |
| chr28 | 10436522 | 2 | 36 | G:1                  | A:0   |              |
| chr28 | 10437820 | 2 | 36 | C:1                  | G:0   |              |
| chr28 | 10438297 | 2 | 36 | G:0.5                | T:0.5 |              |

|       |          |   |    |               |               |
|-------|----------|---|----|---------------|---------------|
| chr28 | 10438805 | 2 | 40 | GCCAGGAC:1    | G:0           |
| chr28 | 10441394 | 2 | 34 | G:1 A:0       |               |
| chr28 | 10441797 | 2 | 36 | G:0.638889    | C:0.361111    |
| chr28 | 10441989 | 2 | 36 | G:1 T:0       |               |
| chr28 | 10442087 | 2 | 38 | T:1 A:0       |               |
| chr28 | 10442113 | 2 | 38 | A:1 AG:0      |               |
| chr28 | 10442807 | 2 | 38 | A:1 C:0       |               |
| chr28 | 10443124 | 2 | 34 | C:1 CCT:0     |               |
| chr28 | 10443155 | 2 | 36 | TA:1 T:0      |               |
| chr28 | 10443174 | 2 | 36 | A:1 AAAATTT:0 |               |
| chr28 | 10443485 | 2 | 36 | A:1 T:0       |               |
| chr28 | 10443497 | 2 | 36 | TA:1 T:0      |               |
| chr28 | 10443670 | 2 | 34 | T:1 TA:0      |               |
| chr28 | 10443950 | 2 | 34 | T:0.941176    | TAA:0.0588235 |
| chr28 | 10443955 | 2 | 32 | A:0.71875     | AAT:0.28125   |
| chr28 | 10444272 | 2 | 38 | A:1 G:0       |               |
| chr28 | 10444470 | 2 | 36 | A:1 T:0       |               |
| chr28 | 10444772 | 2 | 38 | C:1 T:0       |               |
| chr28 | 10445301 | 2 | 28 | C:1 T:0       |               |
| chr28 | 10445305 | 2 | 28 | T:1 C:0       |               |
| chr28 | 10445326 | 2 | 26 | C:1 G:0       |               |
| chr28 | 10445406 | 2 | 36 | C:1 A:0       |               |
| chr28 | 10445550 | 2 | 36 | C:1 A:0       |               |
| chr28 | 10445640 | 2 | 32 | C:1 T:0       |               |
| chr28 | 10446428 | 2 | 34 | C:1 T:0       |               |
| chr28 | 10446700 | 2 | 36 | T:1 C:0       |               |
| chr28 | 10446807 | 2 | 34 | T:1 C:0       |               |
| chr28 | 10446829 | 2 | 32 | G:1 A:0       |               |
| chr28 | 10446843 | 2 | 32 | G:1 A:0       |               |
| chr28 | 10447462 | 2 | 36 | T:0.972222    | C:0.0277778   |
| chr28 | 10447683 | 2 | 34 | C:1 T:0       |               |
| chr28 | 10447739 | 2 | 28 | G:0.785714    | GT:0.214286   |
| chr28 | 10447794 | 2 | 36 | C:0.944444    | CAG:0.0555556 |
| chr28 | 10448124 | 2 | 38 | A:1 G:0       |               |
| chr28 | 10448364 | 2 | 38 | A:1 G:0       |               |
| chr28 | 10449013 | 2 | 40 | G:1 A:0       |               |
| chr28 | 10449165 | 2 | 34 | T:1 C:0       |               |
| chr28 | 10449174 | 2 | 34 | G:1 A:0       |               |
| chr28 | 10449975 | 2 | 36 | C:1 T:0       |               |
| chr28 | 10449977 | 2 | 36 | A:1 C:0       |               |
| chr28 | 10450144 | 2 | 32 | A:1 T:0       |               |
| chr28 | 10450153 | 3 | 32 | TA:0.75 T:0   | TAA:0.25      |
| chr28 | 10450155 | 2 | 32 | A:1 T:0       |               |
| chr28 | 10451487 | 2 | 40 | TCA:0.975     | T:0.025       |
| chr28 | 10451760 | 2 | 36 | C:0.666667    | T:0.333333    |
| chr28 | 10453124 | 2 | 38 | G:0.552632    | T:0.447368    |
| chr28 | 10453220 | 2 | 36 | C:0.472222    | T:0.527778    |
| chr28 | 10453221 | 2 | 36 | T:0.472222    | G:0.527778    |
| chr28 | 10453340 | 2 | 36 | G:0.555556    | A:0.444444    |
| chr28 | 10453397 | 2 | 38 | G:0.973684    | A:0.0263158   |
| chr28 | 10453654 | 2 | 34 | T:0.470588    | C:0.529412    |
| chr28 | 10454031 | 2 | 38 | C:0.5 T:0.5   |               |
| chr28 | 10454118 | 2 | 36 | G:1 A:0       |               |
| chr28 | 10455483 | 2 | 34 | G:1 A:0       |               |

|       |          |   |    |             |     |             |
|-------|----------|---|----|-------------|-----|-------------|
| chr28 | 10455514 | 2 | 36 | T:1         | C:0 |             |
| chr28 | 10456454 | 2 | 40 | T:0         | C:1 |             |
| chr28 | 10456632 | 2 | 38 | C:1         | T:0 |             |
| chr28 | 10457104 | 2 | 38 | AT:0        | A:1 |             |
| chr28 | 10457244 | 2 | 38 | A:1         | T:0 |             |
| chr28 | 10457252 | 2 | 38 | C:1         | T:0 |             |
| chr28 | 10457765 | 2 | 36 | T:1         | G:0 |             |
| chr28 | 10458109 | 2 | 32 | G:0.96875   |     | A:0.03125   |
| chr28 | 10458290 | 2 | 30 | G:0         | A:1 |             |
| chr28 | 10458604 | 2 | 36 | A:0         | G:1 |             |
| chr28 | 10458825 | 2 | 38 | A:0         | C:1 |             |
| chr28 | 10459013 | 2 | 40 | G:1         | A:0 |             |
| chr28 | 10460830 | 2 | 38 | T:1         | C:0 |             |
| chr28 | 10460841 | 2 | 38 | A:1         | G:0 |             |
| chr28 | 10461036 | 2 | 36 | A:1         | G:0 |             |
| chr28 | 10461926 | 2 | 38 | A:1         | G:0 |             |
| chr28 | 10462118 | 2 | 38 | A:0         | C:1 |             |
| chr28 | 10462141 | 2 | 40 | C:1         | T:0 |             |
| chr28 | 10462648 | 2 | 36 | C:1         | T:0 |             |
| chr28 | 10462900 | 2 | 36 | T:1         | C:0 |             |
| chr28 | 10463060 | 2 | 34 | A:1         | G:0 |             |
| chr28 | 10463186 | 2 | 38 | T:0         | C:1 |             |
| chr28 | 10463187 | 2 | 38 | G:0         | A:1 |             |
| chr28 | 10463400 | 2 | 34 | AT:0.676471 |     | A:0.323529  |
| chr28 | 10463475 | 2 | 38 | CGGCTTT:0   |     | C:1         |
| chr28 | 10463618 | 2 | 38 | C:0         | T:1 |             |
| chr28 | 10463649 | 2 | 38 | A:0         | G:1 |             |
| chr28 | 10463654 | 2 | 38 | A:0         | C:1 |             |
| chr28 | 10464467 | 2 | 34 | CT:0        | C:1 |             |
| chr28 | 10465467 | 2 | 36 | G:0         | A:1 |             |
| chr28 | 10466178 | 2 | 34 | A:0         | T:1 |             |
| chr28 | 10466668 | 2 | 38 | G:0         | A:1 |             |
| chr28 | 10467048 | 2 | 32 | C:0.90625   |     | CT:0.09375  |
| chr28 | 10468099 | 2 | 38 | C:0         | T:1 |             |
| chr28 | 10468140 | 2 | 38 | C:0         | T:1 |             |
| chr28 | 10468190 | 2 | 40 | A:0         | T:1 |             |
| chr28 | 10468601 | 2 | 34 | A:0         | C:1 |             |
| chr28 | 10468818 | 2 | 38 | C:0.973684  |     | T:0.0263158 |
| chr28 | 10469513 | 2 | 36 | GT:1        | G:0 |             |
| chr28 | 10469933 | 2 | 38 | T:1         | C:0 |             |
| chr28 | 10470363 | 2 | 38 | G:1         | A:0 |             |
| chr28 | 10470454 | 2 | 38 | C:1         | T:0 |             |
| chr28 | 10471019 | 2 | 36 | T:1         | C:0 |             |
| chr28 | 10471128 | 2 | 38 | A:1         | G:0 |             |
| chr28 | 10471268 | 2 | 38 | G:0         | T:1 |             |
| chr28 | 10471749 | 2 | 36 | G:1         | C:0 |             |
| chr28 | 10472372 | 2 | 34 | G:0         | C:1 |             |
| chr28 | 10472382 | 2 | 34 | C:0         | T:1 |             |
| chr28 | 10472405 | 2 | 32 | A:0         | G:1 |             |
| chr28 | 10472496 | 2 | 32 | T:0         | C:1 |             |
| chr28 | 10472721 | 2 | 34 | G:1         | A:0 |             |
| chr28 | 10473124 | 2 | 38 | C:1         | T:0 |             |
| chr28 | 10473220 | 2 | 38 | C:1         | A:0 |             |
| chr28 | 10473702 | 2 | 38 | A:1         | G:0 |             |

|             |          |   |    |                              |         |            |
|-------------|----------|---|----|------------------------------|---------|------------|
| chr28       | 10474306 | 2 | 36 | G:1                          | T:0     |            |
| chr28       | 10474709 | 2 | 36 | C:0                          | G:1     |            |
| chr28       | 10474800 | 2 | 38 | A:0                          | G:1     |            |
| chr28       | 10475240 | 2 | 38 | CAAAT:0                      | C:1     |            |
| chr28       | 10476277 | 2 | 32 | A:0                          | AT:1    |            |
| chr28       | 10476460 | 2 | 36 | CAG:0.861111                 |         | C:0.138889 |
| chr28       | 10477100 | 2 | 40 | G:0                          | C:1     |            |
| chr28       | 10477151 | 2 | 38 | G:0                          | A:1     |            |
| chr28       | 10477238 | 2 | 38 | T:1                          | A:0     |            |
| chr28       | 10477792 | 2 | 38 | TG:0                         | T:1     |            |
| chr28       | 10477931 | 2 | 38 | G:0                          | A:1     |            |
| chr28       | 10478437 | 2 | 36 | AT:0                         | A:1     |            |
| chr28       | 10478679 | 2 | 30 | G:0                          | A:1     |            |
| chr28       | 10478862 | 2 | 36 | A:0                          | G:1     |            |
| chr28       | 10479039 | 2 | 32 | C:1                          | T:0     |            |
| chr28       | 10479052 | 2 | 32 | T:1                          | C:0     |            |
| chr28       | 10479655 | 2 | 38 | C:1                          | A:0     |            |
| chr28       | 10479729 | 2 | 38 | TACATACATATACAC:0            |         | T:1        |
| chr28       | 10480199 | 2 | 36 | T:1                          | A:0     |            |
| chr28       | 10480614 | 2 | 40 | C:1                          | A:0     |            |
| chr28       | 10480617 | 2 | 40 | A:1                          | T:0     |            |
| chr28       | 10480627 | 2 | 40 | C:1                          | T:0     |            |
| chr28       | 10480657 | 2 | 36 | A:1                          | C:0     |            |
| chr28       | 10480753 | 2 | 38 | CAAA:1                       | C:0     |            |
| chr28       | 10480930 | 2 | 36 | G:0                          | A:1     |            |
| chr28       | 10481065 | 2 | 36 | T:1                          | C:0     |            |
| chr28       | 10481291 | 2 | 36 | G:1                          | A:0     |            |
| chr28       | 10481321 | 2 | 36 | G:1                          | A:0     |            |
| chr28       | 10481705 | 2 | 36 | G:1                          | A:0     |            |
| chr28       | 10481790 | 2 | 36 | G:1                          | A:0     |            |
| chr28       | 10482555 | 2 | 34 | T:1                          | A:0     |            |
| chr28       | 10482662 | 2 | 38 | A:1                          | G:0     |            |
| chr28       | 10482683 | 2 | 40 | C:1                          | CAGTT:0 |            |
| chr28       | 10482915 | 2 | 40 | A:1                          | C:0     |            |
| chr28       | 10483086 | 2 | 36 | A:1                          | G:0     |            |
| chr28       | 10483165 | 2 | 40 | G:1                          | A:0     |            |
| chr28       | 10484059 | 2 | 36 | A:0                          | T:1     |            |
| chr28       | 10484244 | 2 | 32 | C:1                          | G:0     |            |
| chr28       | 10484531 | 2 | 38 | AGAGGATGGATAGGTGAAG:0.947368 |         |            |
| A:0.0526316 |          |   |    |                              |         |            |
| chr28       | 10484723 | 2 | 34 | A:1                          | G:0     |            |
| chr28       | 10484729 | 2 | 34 | C:1                          | T:0     |            |
| chr28       | 10484756 | 2 | 32 | A:1                          | AC:0    |            |
| chr28       | 10484941 | 2 | 36 | A:1                          | G:0     |            |
| chr28       | 10485235 | 2 | 38 | C:1                          | T:0     |            |
| chr28       | 10485354 | 2 | 36 | G:0.138889                   |         | A:0.861111 |
| chr28       | 10485410 | 2 | 36 | G:1                          | A:0     |            |
| chr28       | 10485591 | 2 | 34 | A:1                          | G:0     |            |
| chr28       | 10485726 | 2 | 32 | T:1                          | C:0     |            |
| chr28       | 10485753 | 2 | 34 | T:1                          | C:0     |            |
| chr28       | 10486174 | 2 | 38 | A:0                          | G:1     |            |
| chr28       | 10486240 | 2 | 40 | C:0                          | CTAAA:1 |            |
| chr28       | 10486311 | 2 | 38 | T:1                          | A:0     |            |
| chr28       | 10486438 | 2 | 30 | C:0                          | A:1     |            |

|       |             |   |    |                              |          |             |
|-------|-------------|---|----|------------------------------|----------|-------------|
| chr28 | 10486495    | 2 | 36 | C:0                          | G:1      |             |
| chr28 | 10487737    | 2 | 38 | A:0                          | G:1      |             |
| chr28 | 10487775    | 2 | 36 | G:0                          | A:1      |             |
| chr28 | 10488156    | 2 | 38 | T:1                          | C:0      |             |
| chr28 | 10488182    | 2 | 38 | T:1                          | C:0      |             |
| chr28 | 10488230    | 2 | 36 | G:0                          | A:1      |             |
| chr28 | 10488231    | 2 | 36 | T:0                          | C:1      |             |
| chr28 | 10488467    | 2 | 34 | C:1                          | CT:0     |             |
| chr28 | 10488606    | 2 | 40 | T:1                          | C:0      |             |
| chr28 | 10488873    | 2 | 36 | AC:1                         | A:0      |             |
| chr28 | 10488986    | 2 | 38 | G:1                          | A:0      |             |
| chr28 | 10489224    | 2 | 36 | A:1                          | G:0      |             |
| chr28 | 10489255    | 2 | 36 | A:0                          | C:1      |             |
| chr28 | 10489259    | 2 | 36 | A:0                          | G:1      |             |
| chr28 | 10489306    | 2 | 38 | C:0                          | CCA:1    |             |
| chr28 | 10489446    | 2 | 34 | CA:1                         | C:0      |             |
| chr28 | 10489453    | 2 | 34 | G:1                          | C:0      |             |
| chr28 | 10489887    | 2 | 38 | G:0                          | T:1      |             |
| chr28 | 10489978    | 2 | 38 | T:0                          | G:1      |             |
| chr28 | 10490118    | 2 | 38 | T:0                          | C:1      |             |
| chr28 | 10490313    | 2 | 40 | A:1                          | T:0      |             |
| chr28 | 10490316    | 2 | 38 | G:0                          | C:1      |             |
| chr28 | 10490690    | 2 | 36 | G:1                          | A:0      |             |
| chr28 | 10490875    | 2 | 36 | G:0                          | A:1      |             |
| chr28 | 10490928    | 2 | 34 | GAC:0.823529                 |          | G:0.176471  |
| chr28 | 10490959    | 2 | 34 | G:0.176471                   |          | A:0.823529  |
| chr28 | 10490970    | 2 | 36 | T:0.833333                   |          | A:0.166667  |
| chr28 | 10491278    | 2 | 38 | G:0                          | A:1      |             |
| chr28 | 10491324    | 2 | 38 | C:0                          | T:1      |             |
| chr28 | 10491898    | 2 | 36 | T:0.888889                   |          | C:0.111111  |
| chr28 | 10492084    | 2 | 34 | A:0                          | G:1      |             |
| chr28 | 10492096    | 2 | 34 | G:1                          | A:0      |             |
| chr28 | 10492234    | 2 | 34 | T:1                          | A:0      |             |
| chr28 | 10492251    | 2 | 34 | A:1                          | T:0      |             |
| chr28 | 10492788    | 2 | 36 | C:1                          | T:0      |             |
| chr28 | 10493120    | 2 | 38 | C:0                          | T:1      |             |
| chr28 | 10493336    | 2 | 38 | T:1                          | C:0      |             |
| chr28 | 10493467    | 2 | 38 | G:1                          | C:0      |             |
| chr28 | 10493542    | 2 | 38 | G:1                          | GC:0     |             |
| chr28 | 10493971    | 3 | 28 | CTT:0.0357143                |          | C:0.0714286 |
|       | CT:0.892857 |   |    |                              |          |             |
| chr28 | 10494096    | 2 | 38 | G:0.842105                   |          | C:0.157895  |
| chr28 | 10494328    | 2 | 38 | CA:1                         | C:0      |             |
| chr28 | 10494341    | 2 | 34 | G:0.970588                   |          | A:0.0294118 |
| chr28 | 10494349    | 2 | 34 | A:0                          | G:1      |             |
| chr28 | 10494830    | 2 | 36 | T:0                          | C:1      |             |
| chr28 | 10494838    | 2 | 36 | T:0                          | C:1      |             |
| chr28 | 10494914    | 2 | 36 | T:0                          | C:1      |             |
| chr28 | 10495072    | 2 | 32 | C:0.8125                     | T:0.1875 |             |
| chr28 | 10495147    | 2 | 30 | C:1                          | T:0      |             |
| chr28 | 10495571    | 2 | 36 | G:1                          | T:0      |             |
| chr28 | 10495874    | 2 | 38 | C:0.815789                   |          | T:0.184211  |
| chr28 | 10495926    | 2 | 38 | A:0.763158                   |          | G:0.236842  |
| chr28 | 10496120    | 2 | 40 | TAAGAAGAGGAAAAGAAAAAAAAAAAAA |          | :0.85       |

T:0.15

|              |             |    |                               |          |              |
|--------------|-------------|----|-------------------------------|----------|--------------|
| chr28        | 10496286 2  | 38 | A:0                           | G:1      |              |
| chr28        | 10496348 2  | 34 | G:0.205882                    |          | T:0.794118   |
| chr28        | 10496390 2  | 40 | A:0.825                       | G:0.175  |              |
| chr28        | 10496416 2  | 40 | A:0.8                         | G:0.2    |              |
| chr28        | 10496501 2  | 38 | T:0.868421                    |          | C:0.131579   |
| chr28        | 10496502 2  | 38 | G:0.868421                    |          | A:0.131579   |
| chr28        | 10496557 2  | 28 | G:0.821429                    |          | A:0.178571   |
| chr28        | 10496630 2  | 36 | C:0.916667                    |          | T:0.0833333  |
| chr28        | 10496764 2  | 38 | G:0.157895                    |          | A:0.842105   |
| chr28        | 10496770 2  | 38 | G:1                           | C:0      |              |
| chr28        | 10496875 2  | 34 | A:0                           | C:1      |              |
| chr28        | 10497044 2  | 36 | T:0.833333                    |          | C:0.166667   |
| chr28        | 10497105 2  | 34 | AAGG:0.117647                 |          | A:0.882353   |
| chr28        | 10497318 2  | 24 | A:0.208333                    |          | G:0.791667   |
| chr28        | 10497383 2  | 26 | C:0.307692                    |          | A:0.692308   |
| chr28        | 10497468 2  | 36 | G:0.777778                    |          | A:0.222222   |
| chr28        | 10497554 2  | 38 | G:0.868421                    |          | A:0.131579   |
| chr28        | 10497558 2  | 38 | C:0.868421                    |          | T:0.131579   |
| chr28        | 10497565 2  | 38 | C:0.868421                    |          | A:0.131579   |
| chr28        | 10497589 2  | 38 | A:0                           | C:1      |              |
| chr28        | 10497592 2  | 38 | G:0                           | C:1      |              |
| chr28        | 10497660 2  | 36 | G:0.833333                    |          | A:0.166667   |
| chr28        | 10497693 2  | 38 | A:0                           | AC:1     |              |
| chr28        | 10497725 2  | 38 | A:0.815789                    |          | C:0.184211   |
| chr28        | 10497773 2  | 36 | A:0.833333                    |          | G:0.166667   |
| chr28        | 10498021 2  | 36 | T:0.111111                    |          | C:0.888889   |
| chr28        | 10498078 2  | 38 | A:0.131579                    |          | G:0.868421   |
| chr28        | 10498147 4  | 32 | GCACACA:0.0625                |          | G:0.75 GCA:  |
| 0.0625       | GCACA:0.125 |    |                               |          |              |
| chr28        | 10498448 2  | 40 | G:0.875                       | A:0.125  |              |
| chr28        | 10498511 2  | 40 | T:1                           | G:0      |              |
| chr28        | 10498541 2  | 40 | AGGTCCTGTCTGGTAACAGGACCT:0.85 |          |              |
| A:0.15       |             |    |                               |          |              |
| chr28        | 10498710 2  | 40 | C:0.875                       | T:0.125  |              |
| chr28        | 10498723 2  | 40 | T:0.875                       | C:0.125  |              |
| chr28        | 10499073 2  | 30 | C:0                           | CA:1     |              |
| chr28        | 10499137 2  | 34 | C:0.941176                    |          | T:0.0588235  |
| chr28        | 10499219 2  | 36 | TC:0.916667                   |          | T:0.0833333  |
| chr28        | 10499282 2  | 36 | TA:0.611111                   |          | T:0.388889   |
| chr28        | 10499359 2  | 36 | G:0.861111                    |          | C:0.138889   |
| chr28        | 10499416 2  | 38 | A:0.815789                    |          | T:0.184211   |
| chr28        | 10499501 2  | 40 | CA:0.9                        | C:0.1    |              |
| chr28        | 10499571 2  | 40 | G:0.85                        | A:0.15   |              |
| chr28        | 10499708 2  | 40 | T:0.85                        | C:0.15   |              |
| chr28        | 10499713 2  | 40 | T:0.85                        | C:0.15   |              |
| chr28        | 10499878 2  | 34 | A:0                           | G:1      |              |
| chr28        | 10500007 2  | 32 | T:0.9375                      | C:0.0625 |              |
| chr28        | 10500100 3  | 30 | T:0.833333                    |          | TA:0.0333333 |
| TAA:0.133333 |             |    |                               |          |              |
| chr28        | 10500406 2  | 34 | C:0.852941                    |          | T:0.147059   |
| chr28        | 10500445 2  | 36 | C:0.888889                    |          | T:0.111111   |
| chr28        | 10500483 2  | 34 | G:0.852941                    |          | A:0.147059   |
| chr28        | 10500524 2  | 36 | G:0.861111                    |          | A:0.138889   |

|       |            |    |                   |                  |
|-------|------------|----|-------------------|------------------|
| chr28 | 10500529 2 | 36 | G:0.861111        | A:0.138889       |
| chr28 | 10500978 2 | 30 | A:0.866667        | G:0.133333       |
| chr28 | 10501240 2 | 34 | A:0.735294        | G:0.264706       |
| chr28 | 10501364 2 | 36 | G:0.888889        | C:0.111111       |
| chr28 | 10501382 2 | 38 | A:0.868421        | G:0.131579       |
| chr28 | 10501385 2 | 38 | A:0.868421        | G:0.131579       |
| chr28 | 10501432 2 | 40 | T:0.875 C:0.125   |                  |
| chr28 | 10501443 2 | 40 | A:0.875 G:0.125   |                  |
| chr28 | 10501454 2 | 40 | G:1 A:0           |                  |
| chr28 | 10501493 2 | 40 | G:0.875 C:0.125   |                  |
| chr28 | 10501534 2 | 36 | C:1 T:0           |                  |
| chr28 | 10501548 2 | 36 | C:1 T:0           |                  |
| chr28 | 10501639 2 | 38 | G:0.894737        | A:0.105263       |
| chr28 | 10501640 2 | 38 | T:0.894737        | G:0.105263       |
| chr28 | 10501691 2 | 40 | A:0.825 G:0.175   |                  |
| chr28 | 10501816 2 | 40 | T:0.9 C:0.1       |                  |
| chr28 | 10501919 2 | 36 | T:0.972222        | G:0.0277778      |
| chr28 | 10502181 2 | 34 | A:1 C:0           |                  |
| chr28 | 10502226 2 | 30 | A:0.9 G:0.1       |                  |
| chr28 | 10502518 2 | 36 | A:0.444444        | G:0.555556       |
| chr28 | 10502522 2 | 32 | G:1 A:0           |                  |
| chr28 | 10502601 2 | 38 | T:1 C:0           |                  |
| chr28 | 10502730 2 | 38 | C:0 G:1           |                  |
| chr28 | 10502893 2 | 36 | T:0.888889        | C:0.111111       |
| chr28 | 10503172 2 | 34 | G:0.882353        | A:0.117647       |
| chr28 | 10503199 2 | 36 | C:0.861111        | T:0.138889       |
| chr28 | 10503801 2 | 26 | CTTTTCTT:0.269231 | C:               |
|       | 0.730769   |    |                   |                  |
| chr28 | 10503808 2 | 34 | T:0.911765        | TTTTTC:0.0882353 |
| chr28 | 10503843 2 | 30 | CTTT:0.933333     | C:0.0666667      |
| chr28 | 10504846 2 | 36 | G:0.944444        | T:0.0555556      |
| chr28 | 10505578 2 | 36 | TGA:0.888889      | T:0.111111       |
| chr28 | 10505851 2 | 34 | CT:0.941176       | C:0.0588235      |
| chr28 | 10506237 2 | 36 | A:0.861111        | C:0.138889       |
| chr28 | 10506576 2 | 40 | G:0.925 A:0.075   |                  |
| chr28 | 10506774 2 | 40 | T:0.075 C:0.925   |                  |
| chr28 | 10506846 2 | 38 | T:0.842105        | C:0.157895       |
| chr28 | 10506862 2 | 38 | C:0.842105        | CCTTG:0.157895   |
| chr28 | 10506923 2 | 34 | A:0.911765        | G:0.0882353      |
| chr28 | 10507097 2 | 34 | T:0.852941        | C:0.147059       |
| chr28 | 10507576 2 | 34 | C:0.852941        | T:0.147059       |
| chr28 | 10507885 2 | 36 | C:1 G:0           |                  |
| chr28 | 10507946 2 | 30 | T:0.866667        | C:0.133333       |
| chr28 | 10507957 2 | 18 | C:0.5 CT:0.5      |                  |
| chr28 | 10508091 2 | 36 | C:1 T:0           |                  |
| chr28 | 10508159 3 | 34 | TAA:0.617647      | T:0 TA:          |
|       | 0.382353   |    |                   |                  |
| chr28 | 10508191 2 | 26 | C:1 CT:0          |                  |
| chr28 | 10508347 2 | 38 | A:0.921053        | G:0.0789474      |
| chr28 | 10508357 2 | 38 | T:0.921053        | C:0.0789474      |
| chr28 | 10508629 2 | 32 | C:1 T:0           |                  |
| chr28 | 10509066 2 | 36 | G:0 T:1           |                  |
| chr28 | 10511315 2 | 36 | T:0 C:1           |                  |
| chr28 | 10512059 2 | 34 | G:1 A:0           |                  |



|       |            |    |             |             |
|-------|------------|----|-------------|-------------|
| chr28 | 10512115 2 | 38 | T:0.973684  | TTCTCTCTC:  |
|       | 0.0263158  |    |             |             |
| chr28 | 10512616 2 | 40 | G:0.575     | GT:0.425    |
| chr28 | 10512620 2 | 40 | T:1         | G:0         |
| chr28 | 10512669 2 | 36 | T:1         | C:0         |
| chr28 | 10512749 2 | 40 | T:1         | C:0         |
| chr28 | 10513085 2 | 36 | A:0         | G:1         |
| chr28 | 10513322 2 | 38 | C:0.973684  | T:0.0263158 |
| chr28 | 10513530 2 | 38 | G:1         | T:0         |
| chr28 | 10514199 2 | 36 | C:0         | T:1         |
| chr28 | 10514412 2 | 38 | A:0         | G:1         |
| chr28 | 10514583 2 | 36 | C:0         | T:1         |
| chr28 | 10515232 2 | 34 | A:0         | G:1         |
| chr28 | 10515282 2 | 32 | T:0         | A:1         |
| chr28 | 10515351 3 | 36 | A:1         | T:0         |
|       |            |    |             | AT:0        |
| chr28 | 10515445 2 | 32 | G:1         | A:0         |
| chr28 | 10516428 2 | 36 | T:1         | G:0         |
| chr28 | 10516548 2 | 38 | T:1         | C:0         |
| chr28 | 10517160 2 | 36 | A:0         | G:1         |
| chr28 | 10517313 2 | 36 | T:0         | C:1         |
| chr28 | 10517345 2 | 36 | A:0         | G:1         |
| chr28 | 10517435 2 | 20 | C:0         | T:1         |
| chr28 | 10517439 2 | 20 | T:0         | TCC:1       |
| chr28 | 10517453 2 | 30 | T:1         | TCA:0       |
| chr28 | 10517690 2 | 32 | G:0.1875    | A:0.8125    |
| chr28 | 10517787 2 | 30 | C:0         | T:1         |
| chr28 | 10517820 2 | 30 | C:0.3       | T:0.7       |
| chr28 | 10518033 2 | 34 | T:1         | C:0         |
| chr28 | 10518080 2 | 40 | G:0.725     | GT:0.275    |
| chr28 | 10518081 3 | 40 | G:0.025     | T:0.275     |
|       |            |    |             | GTT:0.7     |
| chr28 | 10518269 2 | 28 | G:1         | A:0         |
| chr28 | 10518280 2 | 28 | C:1         | G:0         |
| chr28 | 10518281 2 | 30 | C:1         | T:0         |
| chr28 | 10518374 2 | 30 | G:1         | C:0         |
| chr28 | 10518411 2 | 32 | G:0.65625   | C:0.34375   |
| chr28 | 10518497 2 | 30 | CG:0.533333 | C:0.466667  |
| chr28 | 10519342 2 | 10 | AG:0        | A:1         |
| chr28 | 10519353 2 | 14 | TC:0        | T:1         |
| chr28 | 10519366 2 | 16 | TC:0        | T:1         |
| chr28 | 10519388 2 | 20 | CT:0        | C:1         |
| chr28 | 10519430 2 | 16 | CT:0        | C:1         |
| chr28 | 10519534 2 | 20 | A:0.15      | G:0.85      |
| chr28 | 10519546 2 | 20 | A:0.15      | ACC:0.85    |
| chr28 | 10519548 2 | 20 | A:0.15      | G:0.85      |
| chr28 | 10519654 2 | 30 | G:1         | C:0         |
| chr28 | 10519675 2 | 30 | G:0.666667  | C:0.333333  |
| chr28 | 10519739 2 | 24 | T:0.291667  | C:0.708333  |
| chr28 | 10519864 2 | 34 | G:0.5       | A:0.5       |
| chr28 | 10520051 2 | 10 | AG:0.4      | A:0.6       |
| chr28 | 10520150 2 | 34 | A:1         | G:0         |
| chr28 | 10520305 2 | 32 | C:1         | G:0         |
| chr28 | 10520332 2 | 30 | AG:0.666667 | A:0.333333  |
| chr28 | 10520668 2 | 34 | G:0.735294  | A:0.264706  |
| chr28 | 10520890 2 | 40 | C:1         | CG:0        |

|               |          |   |                     |                            |         |                |
|---------------|----------|---|---------------------|----------------------------|---------|----------------|
| chr28         | 10520935 | 2 | 40                  | C:0.625                    | T:0.375 |                |
| chr28         | 10521102 | 2 | 40                  | A:0.25                     | G:0.75  |                |
| chr28         | 10521620 | 2 | 28                  | C:0.571429                 |         | G:0.428571     |
| chr28         | 10522208 | 2 | 36                  | C:0.25                     | A:0.75  |                |
| chr28         | 10522366 | 2 | 40                  | C:0.65                     | T:0.35  |                |
| chr28         | 10522633 | 2 | 40                  | A:0.35                     | G:0.65  |                |
| chr28         | 10522956 | 2 | 30                  | A:0.233333                 |         | AT:0.766667    |
| chr28         | 10522983 | 2 | 34                  | T:1                        | G:0     |                |
| chr28         | 10523071 | 2 | 32                  | A:0.21875                  |         | G:0.78125      |
| chr28         | 10523174 | 2 | 32                  | G:1                        | A:0     |                |
| chr28         | 10523305 | 2 | 34                  | A:0.588235                 |         | G:0.411765     |
| chr28         | 10523777 | 2 | 38                  | A:0.236842                 |         | G:0.763158     |
| chr28         | 10523822 | 2 | 36                  | G:1                        | A:0     |                |
| chr28         | 10524256 | 2 | 34                  | A:0.617647                 |         | G:0.382353     |
| chr28         | 10524518 | 2 | 40                  | T:0.575                    | G:0.425 |                |
| chr28         | 10524932 | 2 | 32                  | T:0.53125                  |         | C:0.46875      |
| chr28         | 10525567 | 2 | 38                  | G:0.631579                 |         | A:0.368421     |
| chr28         | 10525601 | 2 | 38                  | T:0.684211                 |         | A:0.315789     |
| chr28         | 10525681 | 2 | 38                  | C:0.236842                 |         | T:0.763158     |
| chr28         | 10525713 | 2 | 36                  | A:1                        | AT:0    |                |
| chr28         | 10525755 | 4 | 38                  | CAGAGAGAGAG:0.289474       |         | C:             |
| 0.0789474     |          |   | CAGAGAG:0.5         | CAGAGAGAG:0.131579         |         |                |
| chr28         | 10525997 | 2 | 36                  | A:0.277778                 |         | C:0.722222     |
| chr28         | 10526376 | 5 | 40                  | GAATAAATA:0.275            |         | G:0.275 GAATA: |
| 0.175         |          |   | GAATAAATAAATA:0.225 | GAATAAATAAATAAATAAATA:0.05 |         |                |
| chr28         | 10526519 | 2 | 34                  | A:0.205882                 |         | G:0.794118     |
| chr28         | 10527997 | 2 | 34                  | G:0.617647                 |         | T:0.382353     |
| chr28         | 10528186 | 2 | 34                  | GA:0.617647                |         | G:0.382353     |
| chr28         | 10528530 | 2 | 36                  | A:1                        | AT:0    |                |
| chr28         | 10528700 | 2 | 34                  | G:0.676471                 |         | C:0.323529     |
| chr28         | 10528814 | 2 | 34                  | C:0.617647                 |         | T:0.382353     |
| chr28         | 10528977 | 2 | 40                  | C:1                        | G:0     |                |
| chr28         | 10529218 | 2 | 36                  | T:0.277778                 |         | C:0.722222     |
| chr28         | 10529380 | 2 | 36                  | C:0.194444                 |         | G:0.805556     |
| chr28         | 10529384 | 2 | 36                  | C:0.611111                 |         | A:0.388889     |
| chr28         | 10529489 | 3 | 34                  | TA:0.294118                |         | T:0.676471     |
| TAA:0.0294118 |          |   |                     |                            |         |                |
| chr28         | 10529526 | 2 | 34                  | C:0.323529                 |         | CTCTG:0.676471 |
| chr28         | 10530570 | 2 | 38                  | G:1                        | A:0     |                |
| chr28         | 10531210 | 2 | 40                  | A:1                        | G:0     |                |
| chr28         | 10531444 | 2 | 38                  | TG:1                       | T:0     |                |
| chr28         | 10531787 | 2 | 34                  | CA:0.617647                |         | C:0.382353     |
| chr28         | 10531942 | 2 | 36                  | G:0.555556                 |         | A:0.444444     |
| chr28         | 10532071 | 2 | 36                  | G:0.638889                 |         | A:0.361111     |
| chr28         | 10532897 | 2 | 30                  | C:0.666667                 |         | T:0.333333     |
| chr28         | 10533054 | 2 | 34                  | G:0.323529                 |         | C:0.676471     |
| chr28         | 10533354 | 2 | 38                  | TAGAGG:0.973684            |         | T:0.0263158    |
| chr28         | 10533459 | 2 | 38                  | G:0.578947                 |         | T:0.421053     |
| chr28         | 10533652 | 2 | 36                  | G:1                        | A:0     |                |
| chr28         | 10533958 | 2 | 32                  | C:0.65625                  |         | T:0.34375      |
| chr28         | 10534843 | 2 | 38                  | G:0.657895                 |         | A:0.342105     |
| chr28         | 10534893 | 2 | 36                  | T:0.694444                 |         | C:0.305556     |
| chr28         | 10535021 | 3 | 38                  | GA:0.631579                |         | G:0.0526316    |
| GAA:0.315789  |          |   |                     |                            |         |                |

|       |                    |                  |    |                    |                |  |
|-------|--------------------|------------------|----|--------------------|----------------|--|
| chr28 | 10535315           | 2                | 38 | AC:1               | A:0            |  |
| chr28 | 10535331           | 2                | 38 | G:1                | T:0            |  |
| chr28 | 10535811           | 2                | 36 | C:0.555556         | T:0.444444     |  |
| chr28 | 10535898           | 2                | 40 | T:0.725            | G:0.275        |  |
| chr28 | 10535958           | 2                | 36 | G:0.694444         | A:0.305556     |  |
| chr28 | 10536054           | 2                | 38 | C:0.605263         | G:0.394737     |  |
| chr28 | 10536332           | 2                | 32 | C:0.625            | CAG:0.375      |  |
| chr28 | 10536420           | 2                | 40 | A:0.25             | G:0.75         |  |
| chr28 | 10536976           | 2                | 40 | A:1                | G:0            |  |
| chr28 | 10537452           | 2                | 38 | C:0.236842         | CTGAG:0.763158 |  |
| chr28 | 10537507           | 2                | 36 | T:1                | TTG:0          |  |
| chr28 | 10537895           | 3                | 36 | CTGTGTGTG:0.111111 | C:             |  |
|       | 0.805556           | CTGTG:0.08333333 |    |                    |                |  |
| chr28 | 10538001           | 3                | 34 | T:0.205882         | TA:0.323529    |  |
|       | TAA:0.470588       |                  |    |                    |                |  |
| chr28 | 10538258           | 2                | 30 | T:0.266667         | C:0.733333     |  |
| chr28 | 10538270           | 2                | 30 | CA:0.666667        | C:0.333333     |  |
| chr28 | 10538288           | 2                | 30 | C:0.7              | T:0.3          |  |
| chr28 | 10538316           | 2                | 34 | C:0.705882         | T:0.294118     |  |
| chr28 | 10538331           | 2                | 34 | A:0.705882         | T:0.294118     |  |
| chr28 | 10538333           | 2                | 34 | G:0.705882         | A:0.294118     |  |
| chr28 | 10538383           | 3                | 36 | C:0.333333         | CCT:0.111111   |  |
|       | CCTCTCTCT:0.555556 |                  |    |                    |                |  |
| chr28 | 10538390           | 3                | 32 | ATC:0.21875        | A:0.03125      |  |
|       | CTC:0.75           |                  |    |                    |                |  |
| chr28 | 10538436           | 2                | 34 | A:0.235294         | T:0.764706     |  |
| chr28 | 10538437           | 2                | 34 | A:0.647059         | T:0.352941     |  |
| chr28 | 10538626           | 2                | 30 | C:0.933333         | T:0.0666667    |  |
| chr28 | 10538656           | 2                | 38 | G:0.894737         | A:0.105263     |  |
| chr28 | 10538661           | 2                | 38 | G:0.631579         | A:0.368421     |  |
| chr28 | 10538951           | 4                | 40 | TTTTA:0.85         | T:0.125        |  |
|       | TTTTATTTA:0.025    | TTTTATTTATTTA:0  |    |                    |                |  |
| chr28 | 10538997           | 2                | 34 | CAGAG:0.323529     | C:0.676471     |  |
| chr28 | 10539277           | 2                | 36 | G:0.611111         | A:0.388889     |  |
| chr28 | 10539510           | 2                | 32 | C:0.53125          | T:0.46875      |  |
| chr28 | 10539517           | 2                | 32 | G:0.75             | A:0.25         |  |
| chr28 | 10539547           | 2                | 30 | C:1                | T:0            |  |
| chr28 | 10539548           | 2                | 30 | T:0.666667         | A:0.333333     |  |
| chr28 | 10539557           | 2                | 32 | G:1                | T:0            |  |
| chr28 | 10539625           | 2                | 36 | G:0.611111         | C:0.388889     |  |
| chr28 | 10539801           | 2                | 32 | C:1                | T:0            |  |
| chr28 | 10539911           | 2                | 36 | T:0.305556         | C:0.694444     |  |
| chr28 | 10540342           | 2                | 38 | G:0.578947         | A:0.421053     |  |
| chr28 | 10540382           | 2                | 38 | T:0.763158         | C:0.236842     |  |
| chr28 | 10540621           | 2                | 32 | A:1                | G:0            |  |
| chr28 | 10540628           | 2                | 34 | T:0.294118         | A:0.705882     |  |
| chr28 | 10540871           | 2                | 30 | T:0.666667         | A:0.333333     |  |
| chr28 | 10540884           | 2                | 32 | A:0.625            | AT:0.375       |  |
| chr28 | 10540929           | 2                | 28 | C:0.892857         | CAG:0.107143   |  |
| chr28 | 10541015           | 2                | 30 | CG:0.766667        | C:0.233333     |  |
| chr28 | 10541076           | 2                | 36 | A:0                | C:1            |  |
| chr28 | 10541096           | 2                | 36 | T:0                | G:1            |  |
| chr28 | 10541101           | 2                | 36 | T:0                | A:1            |  |
| chr28 | 10541103           | 2                | 36 | T:0                | A:1            |  |

|       |          |   |    |                |                  |              |
|-------|----------|---|----|----------------|------------------|--------------|
| chr28 | 10541118 | 2 | 36 | T:0            | A:1              |              |
| chr28 | 10541125 | 2 | 36 | A:0            | C:1              |              |
| chr28 | 10541264 | 2 | 8  | CCT:0.75       | C:0.25           |              |
| chr28 | 10541327 | 2 | 22 | T:0.136364     |                  | TA:0.863636  |
| chr28 | 10541417 | 2 | 34 | A:0.617647     |                  | G:0.382353   |
| chr28 | 10541554 | 2 | 16 | G:0.5625       | A:0.4375         |              |
| chr28 | 10541916 | 2 | 38 | C:1            | T:0              |              |
| chr28 | 10541958 | 2 | 34 | G:0.617647     |                  | A:0.382353   |
| chr28 | 10541965 | 2 | 34 | C:0.617647     |                  | T:0.382353   |
| chr28 | 10542313 | 2 | 38 | ACT:0.289474   |                  | A:0.710526   |
| chr28 | 10542400 | 2 | 36 | C:0.638889     |                  | T:0.361111   |
| chr28 | 10542690 | 2 | 36 | CG:1           | C:0              |              |
| chr28 | 10542732 | 2 | 36 | G:1            | A:0              |              |
| chr28 | 10543285 | 2 | 38 | A:0.578947     |                  | G:0.421053   |
| chr28 | 10544144 | 2 | 40 | GATTA:0.675    |                  | G:0.325      |
| chr28 | 10544407 | 2 | 38 | GC:0.394737    |                  | G:0.605263   |
| chr28 | 10544578 | 2 | 36 | A:0.694444     |                  | G:0.305556   |
| chr28 | 10544598 | 2 | 34 | C:0.705882     |                  | A:0.294118   |
| chr28 | 10544748 | 2 | 36 | C:1            | T:0              |              |
| chr28 | 10544902 | 2 | 38 | C:0            | T:1              |              |
| chr28 | 10544947 | 2 | 38 | G:0.710526     |                  | A:0.289474   |
| chr28 | 10545316 | 2 | 40 | A:0.15         | G:0.85           |              |
| chr28 | 10545752 | 2 | 34 | G:0.647059     |                  | A:0.352941   |
| chr28 | 10545882 | 2 | 40 | T:1            | C:0              |              |
| chr28 | 10545941 | 2 | 38 | T:0.605263     |                  | C:0.394737   |
| chr28 | 10546062 | 3 | 32 | GC:0.40625     |                  | G:0.59375    |
| GCC:0 |          |   |    |                |                  |              |
| chr28 | 10546246 | 2 | 30 | G:0.633333     |                  | A:0.366667   |
| chr28 | 10546274 | 2 | 30 | AT:1           | A:0              |              |
| chr28 | 10546470 | 2 | 30 | T:0            | G:1              |              |
| chr28 | 10546482 | 2 | 34 | ATC:1          | A:0              |              |
| chr28 | 10546594 | 2 | 30 | C:0.6          | CCG:0.4          |              |
| chr28 | 10546605 | 2 | 30 | C:0.6          | T:0.4            |              |
| chr28 | 10546670 | 2 | 34 | A:0.676471     |                  | G:0.323529   |
| chr28 | 10546749 | 2 | 28 | G:0.821429     |                  | GT:0.178571  |
| chr28 | 10546809 | 3 | 40 | C:0.625        | G:0              | T:0.375      |
| chr28 | 10546810 | 2 | 40 | A:0.625        | G:0.375          |              |
| chr28 | 10547311 | 2 | 36 | C:0.972222     |                  | CG:0.0277778 |
| chr28 | 10547549 | 2 | 36 | T:1            | C:0              |              |
| chr28 | 10547730 | 2 | 34 | C:1            | T:0              |              |
| chr28 | 10548151 | 2 | 36 | C:0.444444     |                  | G:0.555556   |
| chr28 | 10548254 | 2 | 34 | AAG:0.470588   |                  | A:0.529412   |
| chr28 | 10548327 | 2 | 28 | AAAAGAAAG:0.75 |                  | A:0.25       |
| chr28 | 10548437 | 2 | 32 | G:0.4375       | GAAGAAAGA:0.5625 |              |
| chr28 | 10548616 | 2 | 38 | T:1            | C:0              |              |
| chr28 | 10548914 | 2 | 34 | G:0.676471     |                  | A:0.323529   |
| chr28 | 10550186 | 2 | 38 | T:0.578947     |                  | C:0.421053   |
| chr28 | 10550235 | 2 | 36 | C:1            | T:0              |              |
| chr28 | 10550733 | 2 | 30 | TA:0.5         | T:0.5            |              |
| chr28 | 10550976 | 2 | 36 | ATC:0.75       | A:0.25           |              |
| chr28 | 10551173 | 2 | 36 | C:0.694444     |                  | G:0.305556   |
| chr28 | 10551192 | 2 | 36 | A:0.972222     |                  | AT:0.0277778 |
| chr28 | 10551203 | 2 | 36 | TA:0.861111    |                  | T:0.138889   |
| chr28 | 10551273 | 2 | 38 | T:0.894737     |                  | TGA:0.105263 |

|            |            |    |                          |                 |
|------------|------------|----|--------------------------|-----------------|
| chr28      | 10551427 2 | 36 | G:0.416667               | A:0.583333      |
| chr28      | 10551575 3 | 38 | CTAAA:0.763158           | C:0             |
| CTAAATAAA: | 0.236842   |    |                          |                 |
| chr28      | 10551612 3 | 38 | T:0.578947               | A:0.315789      |
| TAAAA:     | 0.105263   |    |                          |                 |
| chr28      | 10551999 2 | 36 | G:0.888889               | A:0.111111      |
| chr28      | 10552082 2 | 36 | G:0.527778               | C:0.472222      |
| chr28      | 10552149 2 | 40 | T:0.7 TAATC:0.3          |                 |
| chr28      | 10552741 2 | 40 | CTT:0.6 C:0.4            |                 |
| chr28      | 10552743 2 | 40 | T:0.6 TACAC:0.4          |                 |
| chr28      | 10553306 2 | 38 | G:1 A:0                  |                 |
| chr28      | 10553549 2 | 40 | G:1 C:0                  |                 |
| chr28      | 10554159 2 | 34 | C:1 T:0                  |                 |
| chr28      | 10555699 4 | 36 | CAG:0.833333             | C:0.111111      |
| CAGAG:     | 0.0555556  |    | CAGAGAGAG:0              |                 |
| chr28      | 10556187 2 | 32 | CCAGT:0.875              | C:0.125         |
| chr28      | 10556286 2 | 30 | C:0.766667               | CATAT:0.233333  |
| chr28      | 10556306 2 | 26 | TAC:1 T:0                |                 |
| chr28      | 10556310 2 | 26 | T:1 TAC:0                |                 |
| chr28      | 10557662 2 | 36 | AAAC:1 A:0               |                 |
| chr28      | 10559647 2 | 40 | CGCCACCAT:0.525          | C:0.475         |
| chr28      | 10560511 2 | 36 | T:0.694444               | TA:0.305556     |
| chr28      | 10561385 2 | 34 | G:1 A:0                  |                 |
| chr28      | 10561624 2 | 34 | G:1 A:0                  |                 |
| chr28      | 10561781 2 | 12 | T:0.666667               | TA:0.333333     |
| chr28      | 10561958 2 | 8  | GAGGA:0.875              | G:0.125         |
| chr28      | 10562746 3 | 38 | CCT:0.421053             | C:0.0789474     |
| CCTCT:     | 0.5        |    |                          |                 |
| chr28      | 10562865 2 | 36 | C:0.888889               | G:0.111111      |
| chr28      | 10563588 2 | 34 | C:1 T:0                  |                 |
| chr28      | 10563736 2 | 36 | G:0.916667               | A:0.0833333     |
| chr28      | 10563944 2 | 34 | CCTCT:0.676471           | C:0.323529      |
| chr28      | 10563995 2 | 30 | TA:0.8 T:0.2             |                 |
| chr28      | 10563996 2 | 34 | A:1 T:0                  |                 |
| chr28      | 10565183 2 | 38 | C:0.947368               | T:0.0526316     |
| chr28      | 10565409 2 | 30 | TA:0.733333              | T:0.266667      |
| chr28      | 10565818 2 | 40 | T:1 G:0                  |                 |
| chr28      | 10566177 2 | 40 | GT:0.5 G:0.5             |                 |
| chr28      | 10566240 2 | 40 | GGGAAGAAA:0.85           | G:0.15          |
| chr28      | 10566893 2 | 38 | T:0.473684               | C:0.526316      |
| chr28      | 10567203 2 | 40 | G:0.725 T:0.275          |                 |
| chr28      | 10567759 2 | 38 | ACAGGCTAACAACTG:0.552632 | A:              |
| 0.447368   |            |    |                          |                 |
| chr28      | 10568250 2 | 32 | T:1 TA:0                 |                 |
| chr28      | 10568591 2 | 38 | G:1 A:0                  |                 |
| chr28      | 10568623 2 | 36 | A:0.611111               | G:0.388889      |
| chr28      | 10569503 2 | 36 | A:0.555556               | G:0.444444      |
| chr28      | 10569890 2 | 34 | A:0.941176               | T:0.0588235     |
| chr28      | 10569998 2 | 36 | CT:1 C:0                 |                 |
| chr28      | 10571008 2 | 34 | T:0.529412               | C:0.470588      |
| chr28      | 10571845 2 | 36 | T:0.5 C:0.5              |                 |
| chr28      | 10572371 2 | 36 | A:0.972222               | T:0.0277778     |
| chr28      | 10573035 2 | 34 | C:0.852941               | CAAGAA:0.147059 |
| chr28      | 10573367 2 | 40 | T:0.575 C:0.425          |                 |

|       |          |   |    |                    |               |
|-------|----------|---|----|--------------------|---------------|
| chr28 | 10573672 | 2 | 32 | C:0.71875          | A:0.28125     |
| chr28 | 10574227 | 2 | 36 | G:1 A:0            |               |
| chr28 | 10574663 | 2 | 38 | G:0.394737         | A:0.605263    |
| chr28 | 10574717 | 2 | 36 | C:0.972222         | G:0.0277778   |
| chr28 | 10574739 | 2 | 38 | A:0.578947         | AT:0.421053   |
| chr28 | 10574749 | 2 | 38 | A:0.578947         | AT:0.421053   |
| chr28 | 10574760 | 2 | 38 | A:0.578947         | AG:0.421053   |
| chr28 | 10575007 | 2 | 38 | A:0.473684         | G:0.526316    |
| chr28 | 10575338 | 2 | 36 | C:0.444444         | CT:0.555556   |
| chr28 | 10575340 | 2 | 38 | T:1 C:0            |               |
| chr28 | 10575737 | 2 | 32 | G:0.75 A:0.25      |               |
| chr28 | 10576071 | 3 | 32 | T:0.0625 A:0.34375 | TA:           |
|       | 0.59375  |   |    |                    |               |
| chr28 | 10576074 | 2 | 32 | A:0.65625          | AT:0.34375    |
| chr28 | 10576100 | 2 | 36 | A:1 T:0            |               |
| chr28 | 10576262 | 2 | 22 | C:0.727273         | CT:0.272727   |
| chr28 | 10576306 | 2 | 36 | C:1 CAGAG:0        |               |
| chr28 | 10576365 | 2 | 34 | C:0.764706         | T:0.235294    |
| chr28 | 10576729 | 2 | 32 | C:0.9375 T:0.0625  |               |
| chr28 | 10576852 | 2 | 36 | T:0.583333         | C:0.416667    |
| chr28 | 10576884 | 2 | 32 | C:0.84375          | CA:0.15625    |
| chr28 | 10576892 | 3 | 34 | A:0.705882         | T:0 AT:       |
|       | 0.294118 |   |    |                    |               |
| chr28 | 10576911 | 2 | 38 | AAAAT:0.710526     | A:0.289474    |
| chr28 | 10576941 | 2 | 36 | G:1 A:0            |               |
| chr28 | 10577125 | 2 | 32 | T:0.9375 TA:0.0625 |               |
| chr28 | 10577126 | 2 | 32 | T:0.9375 A:0.0625  |               |
| chr28 | 10577379 | 2 | 32 | G:0.625 A:0.375    |               |
| chr28 | 10577506 | 2 | 26 | TA:0.730769        | T:0.269231    |
| chr28 | 10577805 | 3 | 36 | C:0.694444         | CCT:0.305556  |
|       | CCTCT:0  |   |    |                    |               |
| chr28 | 10577855 | 2 | 38 | AAAATAAAT:0.5      | A:0.5         |
| chr28 | 10578996 | 2 | 38 | T:0.631579         | TAAC:0.368421 |
| chr28 | 10579062 | 2 | 40 | AAG:0.575          | A:0.425       |
| chr28 | 10580462 | 2 | 36 | C:0.722222         | CT:0.277778   |
| chr28 | 10580464 | 2 | 34 | TA:0.970588        | T:0.0294118   |
| chr28 | 10581386 | 2 | 38 | GA:0.526316        | G:0.473684    |
| chr28 | 10581895 | 2 | 38 | C:1 T:0            |               |
| chr28 | 10581982 | 2 | 38 | A:1 T:0            |               |
| chr28 | 10582211 | 2 | 38 | T:1 C:0            |               |
| chr28 | 10582988 | 2 | 36 | C:0.694444         | T:0.305556    |
| chr28 | 10583824 | 3 | 40 | CA:0.65 C:0        | CAAA:0.35     |
| chr28 | 10584077 | 2 | 34 | C:0.911765         | A:0.0882353   |
| chr28 | 10584152 | 2 | 34 | CCT:0.558824       | C:0.441176    |
| chr28 | 10584919 | 2 | 40 | A:0.6 G:0.4        |               |
| chr28 | 10585831 | 2 | 40 | AT:0.975 A:0.025   |               |
| chr28 | 10586056 | 2 | 34 | T:0.970588         | A:0.0294118   |
| chr28 | 10586531 | 2 | 28 | T:0.535714         | C:0.464286    |
| chr28 | 10586537 | 2 | 28 | G:0.607143         | A:0.392857    |
| chr28 | 10587009 | 2 | 40 | A:1 AAATG:0        |               |
| chr28 | 10588186 | 2 | 36 | C:0.527778         | CA:0.472222   |
| chr28 | 10588731 | 2 | 34 | C:0.5 T:0.5        |               |
| chr28 | 10589102 | 2 | 36 | T:0.527778         | TA:0.472222   |
| chr28 | 10590953 | 2 | 32 | A:0.65625          | G:0.34375     |



|       |          |   |    |                  |                |
|-------|----------|---|----|------------------|----------------|
| chr28 | 10610363 | 2 | 36 | CT:0.888889      | C:0.111111     |
| chr28 | 10610502 | 2 | 34 | G:0.911765       | A:0.0882353    |
| chr28 | 10610893 | 2 | 34 | G:0.705882       | C:0.294118     |
| chr28 | 10611159 | 2 | 36 | T:1              | C:0            |
| chr28 | 10612139 | 2 | 18 | C:1              | T:0            |
| chr28 | 10612291 | 2 | 18 | T:0.277778       | TA:0.722222    |
| chr28 | 10612743 | 2 | 40 | C:1              | T:0            |
| chr28 | 10612925 | 2 | 32 | A:0.96875        | G:0.03125      |
| chr28 | 10612928 | 2 | 32 | A:0.59375        | G:0.40625      |
| chr28 | 10613580 | 2 | 36 | T:0.555556       | C:0.444444     |
| chr28 | 10613752 | 2 | 28 | CCT:0.607143     | C:0.392857     |
| chr28 | 10613808 | 2 | 34 | AT:0.5           | A:0.5          |
| chr28 | 10613812 | 2 | 36 | T:1              | A:0            |
| chr28 | 10614272 | 2 | 28 | A:1              | C:0            |
| chr28 | 10614821 | 2 | 38 | G:0.552632       | T:0.447368     |
| chr28 | 10615196 | 3 | 36 | ATT:0.555556     | A:0 AT:        |
|       |          |   |    |                  | 0.444444       |
| chr28 | 10615512 | 2 | 40 | T:0.85           | G:0.15         |
| chr28 | 10617162 | 4 | 36 | GATTTATTT:0.5    | G:0.194444     |
|       |          |   |    |                  | GATTT:0.305556 |
| chr28 | 10617438 | 2 | 32 | G:1              | A:0            |
| chr28 | 10617682 | 2 | 32 | C:0.59375        | CA:0.40625     |
| chr28 | 10617699 | 2 | 32 | C:0              | T:1            |
| chr28 | 10617780 | 2 | 36 | G:0              | A:1            |
| chr28 | 10617826 | 2 | 36 | G:0              | A:1            |
| chr28 | 10617832 | 2 | 36 | CT:0             | C:1            |
| chr28 | 10617839 | 2 | 36 | T:0              | A:1            |
| chr28 | 10617854 | 2 | 34 | C:0              | A:1            |
| chr28 | 10617869 | 2 | 32 | C:0              | A:1            |
| chr28 | 10617903 | 2 | 38 | T:0              | TA:1           |
| chr28 | 10617918 | 2 | 38 | A:0              | T:1            |
| chr28 | 10617919 | 2 | 38 | T:0              | A:1            |
| chr28 | 10617927 | 2 | 38 | A:0              | AT:1           |
| chr28 | 10617929 | 2 | 38 | A:0              | T:1            |
| chr28 | 10617963 | 2 | 38 | TG:0             | T:1            |
| chr28 | 10617977 | 2 | 38 | GA:0             | G:1            |
| chr28 | 10618000 | 2 | 38 | G:0              | A:1            |
| chr28 | 10618010 | 2 | 38 | A:0              | AC:1           |
| chr28 | 10618031 | 2 | 38 | T:0              | C:1            |
| chr28 | 10618032 | 2 | 38 | T:0              | C:1            |
| chr28 | 10618246 | 2 | 14 | CTA:1            | C:0            |
| chr28 | 10618248 | 2 | 14 | A:0              | C:1            |
| chr28 | 10618872 | 2 | 36 | T:1              | G:0            |
| chr28 | 10618890 | 2 | 36 | A:0.944444       | G:0.0555556    |
| chr28 | 10619117 | 2 | 36 | A:0.583333       | T:0.416667     |
| chr28 | 10619145 | 3 | 36 | CAGAGAG:0.611111 | C:0.0555556    |
|       |          |   |    |                  | CAG:0.333333   |
| chr28 | 10619482 | 2 | 32 | A:0.625          | G:0.375        |
| chr28 | 10619486 | 2 | 32 | C:0.625          | CAG:0.375      |
| chr28 | 10619721 | 2 | 34 | GTGGC:0.911765   | G:0.0882353    |
| chr28 | 10619871 | 2 | 32 | GCT:1            | G:0            |
| chr28 | 10621164 | 2 | 34 | G:0.117647       | T:0.882353     |
| chr28 | 10621953 | 2 | 28 | C:0              | T:1            |
| chr28 | 10621964 | 2 | 28 | A:0              | G:1            |



|       |          |   |    |                             |                |
|-------|----------|---|----|-----------------------------|----------------|
| chr28 | 10622622 | 2 | 38 | GC:0.473684                 | G:0.526316     |
| chr28 | 10622643 | 2 | 38 | G:0.473684                  | GTGA:0.526316  |
| chr28 | 10622647 | 2 | 38 | TAGG:0.473684               | T:0.526316     |
| chr28 | 10622771 | 2 | 36 | T:0.972222                  | TAAA:0.0277778 |
| chr28 | 10622878 | 2 | 36 | G:0.916667                  | A:0.0833333    |
| chr28 | 10622883 | 2 | 36 | T:0.916667                  | C:0.0833333    |
| chr28 | 10622935 | 2 | 34 | T:0.852941                  | G:0.147059     |
| chr28 | 10623376 | 2 | 38 | C:1                         | T:0            |
| chr28 | 10624357 | 2 | 34 | G:1                         | T:0            |
| chr28 | 10624425 | 2 | 40 | C:1                         | A:0            |
| chr28 | 10625989 | 2 | 40 | T:0.875                     | A:0.125        |
| chr28 | 10626000 | 2 | 40 | T:0.875                     | C:0.125        |
| chr28 | 10626353 | 2 | 40 | A:1                         | T:0            |
| chr28 | 10626516 | 2 | 38 | A:0.947368                  | G:0.0526316    |
| chr28 | 10627065 | 2 | 36 | T:1                         | C:0            |
| chr28 | 10627402 | 2 | 36 | A:0.138889                  | G:0.861111     |
| chr28 | 10627470 | 2 | 38 | A:0.868421                  | G:0.131579     |
| chr28 | 10627479 | 2 | 38 | A:0.868421                  | C:0.131579     |
| chr28 | 10627673 | 2 | 34 | A:0.852941                  | G:0.147059     |
| chr28 | 10627837 | 2 | 38 | G:0.0526316                 | A:0.947368     |
| chr28 | 10628053 | 4 | 40 | TAA:0.1                     | T:0.15         |
|       |          |   |    | TA:0.725                    | TAAA:0.025     |
| chr28 | 10628054 | 2 | 40 | A:1                         | C:0            |
| chr28 | 10628554 | 2 | 38 | T:0.105263                  | C:0.894737     |
| chr28 | 10628556 | 2 | 38 | C:0.105263                  | G:0.894737     |
| chr28 | 10628630 | 2 | 36 | A:1                         | G:0            |
| chr28 | 10628686 | 2 | 40 | C:0.125                     | T:0.875        |
| chr28 | 10629369 | 2 | 36 | A:0.888889                  | G:0.111111     |
| chr28 | 10629607 | 2 | 34 | C:1                         | T:0            |
| chr28 | 10629969 | 2 | 40 | GGAGAGAGAGAGAGAGA:0.8       | G:0.2          |
| chr28 | 10630008 | 2 | 40 | CAGAGA:0.8                  | C:0.2          |
| chr28 | 10630016 | 2 | 40 | C:0.8                       | CT:0.2         |
| chr28 | 10630026 | 2 | 40 | GAGAAGCAGGCTCCATGCAGGGA:0.8 |                |
|       |          |   |    | T:0.944444                  | C:0.0555556    |
| chr28 | 10630251 | 2 | 36 | G:1                         | T:0            |
| chr28 | 10630452 | 2 | 38 | C:0.0294118                 | T:0.970588     |
| chr28 | 10630515 | 2 | 34 | T:0.131579                  | G:0.868421     |
| chr28 | 10630780 | 2 | 38 | A:0.894737                  | AT:0.105263    |
| chr28 | 10630830 | 2 | 38 | G:0.815789                  | T:0.184211     |
| chr28 | 10630953 | 2 | 38 | C:1                         | T:0            |
| chr28 | 10630963 | 2 | 38 | T:0                         | C:1            |
| chr28 | 10631066 | 2 | 32 | C:0                         | T:1            |
| chr28 | 10631096 | 2 | 38 | G:0                         | T:1            |
| chr28 | 10631733 | 2 | 38 | T:0.105263                  | C:0.894737     |
| chr28 | 10631854 | 2 | 36 | C:0.0833333                 | A:0.916667     |
| chr28 | 10632105 | 2 | 34 | A:0.0882353                 | G:0.911765     |
| chr28 | 10632233 | 2 | 34 | T:1                         | G:0            |
| chr28 | 10632242 | 2 | 34 | A:0.0588235                 | G:0.941176     |
| chr28 | 10632248 | 2 | 34 | T:1                         | C:0            |
| chr28 | 10632600 | 2 | 38 | T:1                         | C:0            |
| chr28 | 10632617 | 2 | 38 | A:1                         | G:0            |
| chr28 | 10632699 | 2 | 36 | T:0.888889                  | C:0.111111     |
| chr28 | 10632728 | 2 | 34 | G:1                         | C:0            |

|       |               |    |                           |              |
|-------|---------------|----|---------------------------|--------------|
| chr28 | 10632911 2    | 38 | AT:0.947368               | A:0.0526316  |
| chr28 | 10633163 2    | 34 | G:0 C:1                   |              |
| chr28 | 10633165 2    | 34 | C:0 A:1                   |              |
| chr28 | 10633202 2    | 36 | ATGTC:1 A:0               |              |
| chr28 | 10633728 2    | 30 | A:1 AT:0                  |              |
| chr28 | 10633784 2    | 34 | A:1 G:0                   |              |
| chr28 | 10633815 2    | 38 | A:1 T:0                   |              |
| chr28 | 10633825 2    | 38 | G:1 C:0                   |              |
| chr28 | 10633919 2    | 38 | T:0.105263                | A:0.894737   |
| chr28 | 10633945 2    | 36 | TA:1 T:0                  |              |
| chr28 | 10634021 2    | 36 | C:1 CTCCA:0               |              |
| chr28 | 10634257 2    | 38 | TTAAAAAAAAAAAA:1 T:0      |              |
| chr28 | 10634258 3    | 38 | TAAAAAAAA:0.947368        | TAAAA:       |
|       | 0.0526316 T:0 |    |                           |              |
| chr28 | 10634262 2    | 38 | AAAAAAAAT:1 A:0           |              |
| chr28 | 10634264 2    | 40 | A:0.725 AATATATTC:0.275   |              |
| chr28 | 10634266 3    | 40 | A:0.575 T:0.2 AAAAT:0.225 |              |
| chr28 | 10634268 2    | 40 | A:0.8 T:0.2               |              |
| chr28 | 10634269 2    | 34 | AT:1 A:0                  |              |
| chr28 | 10634270 3    | 40 | T:0.8 TTC:0.2 TTCAA:0     |              |
| chr28 | 10634271 2    | 38 | AAATAAAT:1 A:0            |              |
| chr28 | 10634272 3    | 40 | AAT:0.75 TAT:0.05 A:0.2   |              |
| chr28 | 10634274 2    | 36 | TAAA:1 T:0                |              |
| chr28 | 10634279 2    | 36 | A:1 C:0                   |              |
| chr28 | 10634281 2    | 36 | ATAAAT:1 A:0              |              |
| chr28 | 10634487 2    | 34 | A:0.117647                | G:0.882353   |
| chr28 | 10634607 2    | 32 | AAAG:1 A:0                |              |
| chr28 | 10634747 2    | 34 | C:0.0588235               | CA:0.941176  |
| chr28 | 10634817 2    | 30 | G:0.1 C:0.9               |              |
| chr28 | 10634840 2    | 28 | T:0.178571                | C:0.821429   |
| chr28 | 10635490 2    | 28 | C:1 A:0                   |              |
| chr28 | 10636541 2    | 18 | T:0 G:1                   |              |
| chr28 | 10636814 2    | 34 | C:1 CCT:0                 |              |
| chr28 | 10637002 2    | 36 | A:0.138889                | G:0.861111   |
| chr28 | 10637235 2    | 30 | TG:1 T:0                  |              |
| chr28 | 10637237 2    | 30 | G:1 T:0                   |              |
| chr28 | 10638364 2    | 34 | G:1 GT:0                  |              |
| chr28 | 10638365 2    | 34 | G:1 T:0                   |              |
| chr28 | 10638401 2    | 38 | G:0.526316                | A:0.473684   |
| chr28 | 10638429 2    | 36 | C:1 T:0                   |              |
| chr28 | 10638694 2    | 34 | G:1 A:0                   |              |
| chr28 | 10638697 2    | 34 | T:1 C:0                   |              |
| chr28 | 10638806 2    | 40 | T:0.55 C:0.45             |              |
| chr28 | 10638899 2    | 34 | T:0.941176                | A:0.0588235  |
| chr28 | 10639109 2    | 36 | A:1 G:0                   |              |
| chr28 | 10639164 2    | 38 | T:0 C:1                   |              |
| chr28 | 10639509 2    | 32 | GT:0.96875                | G:0.03125    |
| chr28 | 10639510 3    | 32 | T:1 TGG:0                 | TGGG:0       |
| chr28 | 10639511 2    | 30 | GT:1 G:0                  |              |
| chr28 | 10639512 2    | 30 | T:0.9 G:0.1               |              |
| chr28 | 10639567 3    | 28 | G:0.857143                | GA:0.142857  |
| GAA:0 |               |    |                           |              |
| chr28 | 10639837 2    | 36 | C:0.0555556               | T:0.944444   |
| chr28 | 10639951 3    | 38 | C:0.657895                | CCT:0.289474 |

CCTCTCT:0.0526316

|       |            |    |                       |               |       |
|-------|------------|----|-----------------------|---------------|-------|
| chr28 | 10640000 2 | 38 | AT:1                  | A:0           |       |
| chr28 | 10640010 2 | 36 | A:0.888889            | T:0.111111    |       |
| chr28 | 10640011 2 | 36 | T:0.888889            | A:0.111111    |       |
| chr28 | 10640012 2 | 38 | A:1                   | T:0           |       |
| chr28 | 10640013 2 | 38 | A:1                   | T:0           |       |
| chr28 | 10640083 2 | 36 | G:0                   | C:1           |       |
| chr28 | 10640091 2 | 36 | G:0                   | C:1           |       |
| chr28 | 10640200 2 | 36 | T:0.972222            | A:0.0277778   |       |
| chr28 | 10640201 2 | 32 | T:0.9375              | A:0.0625      |       |
| chr28 | 10640230 2 | 34 | C:0.970588            | CAG:0.0294118 |       |
| chr28 | 10640250 2 | 34 | G:0.147059            | GA:0.852941   |       |
| chr28 | 10640251 2 | 34 | G:0.147059            | GA:0.852941   |       |
| chr28 | 10640316 2 | 26 | C:0                   | G:1           |       |
| chr28 | 10640330 2 | 24 | C:1                   | T:0           |       |
| chr28 | 10640350 2 | 24 | C:0.166667            | T:0.833333    |       |
| chr28 | 10640363 2 | 26 | C:0.730769            | T:0.269231    |       |
| chr28 | 10640400 2 | 28 | G:0.0357143           | GA:0.964286   |       |
| chr28 | 10640523 3 | 38 | CTTT:0                | C:1           | CTT:0 |
| chr28 | 10640567 2 | 36 | T:0.138889            | A:0.861111    |       |
| chr28 | 10640568 2 | 36 | A:1                   | T:0           |       |
| chr28 | 10640569 2 | 36 | A:1                   | T:0           |       |
| chr28 | 10641158 2 | 40 | A:1                   | C:0           |       |
| chr28 | 10641161 2 | 40 | GA:0                  | G:1           |       |
| chr28 | 10641648 2 | 38 | T:0.315789            | G:0.684211    |       |
| chr28 | 10642984 2 | 34 | G:0.294118            | A:0.705882    |       |
| chr28 | 10643363 2 | 18 | C:0                   | G:1           |       |
| chr28 | 10643973 2 | 38 | T:0.710526            | C:0.289474    |       |
| chr28 | 10644364 2 | 32 | C:0.8125              | T:0.1875      |       |
| chr28 | 10644502 2 | 38 | T:0.894737            | C:0.105263    |       |
| chr28 | 10644704 2 | 36 | G:1                   | A:0           |       |
| chr28 | 10644856 2 | 40 | C:0.8                 | CCTCT:0.2     |       |
| chr28 | 10644871 2 | 36 | CTGTG:1               | C:0           |       |
| chr28 | 10644873 2 | 40 | G:0.8                 | C:0.2         |       |
| chr28 | 10644911 2 | 36 | TAAAA:0.194444        | T:0.805556    |       |
| chr28 | 10644941 2 | 38 | T:0                   | C:1           |       |
| chr28 | 10645306 2 | 32 | T:0.78125             | G:0.21875     |       |
| chr28 | 10645376 2 | 34 | C:1                   | T:0           |       |
| chr28 | 10645404 2 | 36 | G:0.861111            | C:0.138889    |       |
| chr28 | 10645750 2 | 34 | C:1                   | T:0           |       |
| chr28 | 10645875 2 | 36 | A:1                   | AT:0          |       |
| chr28 | 10645877 2 | 36 | A:0.972222            | T:0.0277778   |       |
| chr28 | 10645886 2 | 38 | AAAAATAAAAT:0.921053  | A:            |       |
|       | 0.0789474  |    |                       |               |       |
| chr28 | 10645933 2 | 38 | A:1                   | T:0           |       |
| chr28 | 10646181 2 | 38 | C:0.868421            | T:0.131579    |       |
| chr28 | 10646700 2 | 36 | C:0.805556            | A:0.194444    |       |
| chr28 | 10646902 2 | 34 | G:0.794118            | A:0.205882    |       |
| chr28 | 10646921 2 | 34 | T:1                   | C:0           |       |
| chr28 | 10646983 2 | 38 | G:0.763158            | C:0.236842    |       |
| chr28 | 10647487 2 | 36 | G:0.305556            | GT:0.694444   |       |
| chr28 | 10647679 2 | 32 | C:0.65625             | T:0.34375     |       |
| chr28 | 10647999 2 | 32 | G:1                   | A:0           |       |
| chr28 | 10648322 4 | 20 | TGGCGGCGGCGGCGGC:0.45 | T:0.45        |       |

|                |                   |    |                               |
|----------------|-------------------|----|-------------------------------|
| TGGCGGC:0      | TGGCGGCGGCGGC:0.1 |    |                               |
| chr28          | 10648328 2        | 20 | C:1 T:0                       |
| chr28          | 10648331 2        | 20 | C:0.9 T:0.1                   |
| chr28          | 10648334 2        | 20 | C:1 T:0                       |
| chr28          | 10648337 2        | 16 | C:0.875 T:0.125               |
| chr28          | 10650449 2        | 40 | GAC:0.875 G:0.125             |
| chr28          | 10650524 2        | 36 | G:0.861111 A:0.138889         |
| chr28          | 10651103 2        | 30 | GT:0.7 G:0.3                  |
| chr28          | 10651360 2        | 40 | T:0.925 TTTGATGCGTCTG:0.075   |
| chr28          | 10653423 3        | 34 | TTC:0.352941 T:0.294118       |
| TTCTC:0.352941 |                   |    |                               |
| chr28          | 10654846 2        | 38 | C:1 CCTCT:0                   |
| chr28          | 10654982 2        | 34 | C:0.705882 T:0.294118         |
| chr28          | 10655254 2        | 34 | C:0.911765 A:0.0882353        |
| chr28          | 10658845 2        | 38 | G:1 A:0                       |
| chr28          | 10660157 2        | 34 | G:0.911765 GT:0.0882353       |
| chr28          | 10660205 2        | 34 | A:0.970588 G:0.0294118        |
| chr28          | 10660330 2        | 34 | C:0.676471 T:0.323529         |
| chr28          | 10660506 2        | 32 | G:0.8125 GTC:0.1875           |
| chr28          | 10660516 3        | 32 | C:0.6875 G:0.3125 CTG:0       |
| chr28          | 10660985 2        | 36 | TA:0.944444 T:0.0555556       |
| chr28          | 10661219 2        | 26 | C:0.846154 CT:0.153846        |
| chr28          | 10663314 3        | 32 | CT:0.65625 C:0.21875          |
| CTT:0.125      |                   |    |                               |
| chr28          | 10664419 2        | 26 | C:1 CT:0                      |
| chr28          | 10664431 2        | 32 | A:1 AT:0                      |
| chr28          | 10664460 2        | 32 | C:0.78125 CAG:0.21875         |
| chr28          | 10664886 2        | 36 | C:0.972222 T:0.0277778        |
| chr28          | 10666011 2        | 40 | A:1 T:0                       |
| chr28          | 10667082 2        | 38 | G:0.868421 A:0.131579         |
| chr28          | 10668639 3        | 26 | GAAA:0.384615 G:0.461538      |
| GA:0.153846    |                   |    |                               |
| chr28          | 10668690 2        | 24 | TC:0.166667 T:0.833333        |
| chr28          | 10670738 2        | 40 | C:1 T:0                       |
| chr28          | 10673042 2        | 32 | T:1 G:0                       |
| chr28          | 10674395 2        | 38 | C:1 T:0                       |
| chr28          | 10674646 2        | 34 | G:1 A:0                       |
| chr28          | 10675012 2        | 36 | A:1 G:0                       |
| chr28          | 10675344 2        | 38 | G:1 A:0                       |
| chr28          | 10675556 2        | 36 | T:1 C:0                       |
| chr28          | 10676284 2        | 36 | A:0.916667 G:0.0833333        |
| chr28          | 10676356 2        | 34 | C:1 A:0                       |
| chr28          | 10676947 2        | 40 | TCTGTTTTGCC:0.95 T:0.05       |
| chr28          | 10677728 2        | 34 | C:1 T:0                       |
| chr28          | 10677902 2        | 38 | T:0.789474 C:0.210526         |
| chr28          | 10682717 2        | 36 | A:0.972222 AC:0.0277778       |
| chr28          | 10685522 2        | 38 | C:0.684211 T:0.315789         |
| chr28          | 10686538 2        | 36 | G:1 A:0                       |
| chr28          | 10689002 2        | 40 | CTATCATT:0 C:1                |
| chr28          | 10689011 2        | 40 | CAACACCAGAAATACTTGACAAAGCTT:0 |
| C:1            |                   |    |                               |
| chr28          | 10689041 2        | 40 | CAAAAG:0 C:1                  |
| chr28          | 10689052 2        | 40 | TGTAGTCTGTCTAC:0 T:1          |
| chr28          | 10689067 2        | 40 | AAATTTCTGACATCAG:0 A:1        |

|       |          |   |    |                 |                |
|-------|----------|---|----|-----------------|----------------|
| chr28 | 10689084 | 2 | 40 | CCCAAAGGAGAA:0  | C:1            |
| chr28 | 10689096 | 2 | 40 | T:0             | TTG:1          |
| chr28 | 10690263 | 2 | 36 | C:1             | T:0            |
| chr28 | 10690732 | 2 | 34 | T:0.941176      | A:0.0588235    |
| chr28 | 10691590 | 2 | 34 | C:1             | A:0            |
| chr28 | 10692902 | 2 | 40 | A:0.6           | G:0.4          |
| chr28 | 10692987 | 2 | 36 | T:0.75          | C:0.25         |
| chr28 | 10693211 | 2 | 26 | G:0.769231      | GA:0.230769    |
| chr28 | 10694061 | 2 | 38 | T:0.684211      | C:0.315789     |
| chr28 | 10694176 | 2 | 34 | G:0.941176      | A:0.0588235    |
| chr28 | 10694780 | 2 | 32 | T:0.65625       | C:0.34375      |
| chr28 | 10694786 | 2 | 32 | C:0.90625       | T:0.09375      |
| chr28 | 10696593 | 2 | 34 | G:0.705882      | A:0.294118     |
| chr28 | 10696929 | 2 | 36 | T:0.944444      | C:0.0555556    |
| chr28 | 10696974 | 2 | 38 | C:0.921053      | T:0.0789474    |
| chr28 | 10697088 | 2 | 38 | C:1             | T:0            |
| chr28 | 10698154 | 2 | 36 | G:0.694444      | A:0.305556     |
| chr28 | 10698493 | 2 | 36 | C:0.361111      | CT:0.638889    |
| chr28 | 10699540 | 2 | 36 | CCTCT:0.861111  | C:0.138889     |
| chr28 | 10699735 | 2 | 36 | A:0.666667      | G:0.333333     |
| chr28 | 10699869 | 2 | 40 | T:0.75          | C:0.25         |
| chr28 | 10700188 | 2 | 30 | T:0.733333      | A:0.266667     |
| chr28 | 10700658 | 2 | 34 | G:0.705882      | T:0.294118     |
| chr28 | 10701197 | 2 | 32 | AG:0.78125      | A:0.21875      |
| chr28 | 10701214 | 2 | 36 | A:0.75          | G:0.25         |
| chr28 | 10701258 | 2 | 38 | A:1             | G:0            |
| chr28 | 10701341 | 2 | 34 | T:0.823529      | A:0.176471     |
| chr28 | 10701625 | 2 | 34 | A:0.735294      | G:0.264706     |
| chr28 | 10702509 | 2 | 40 | CTTTCTTTTCT:0.7 | C:0.3          |
| chr28 | 10702592 | 2 | 38 | G:0.736842      | GACAC:0.263158 |
| chr28 | 10702654 | 2 | 34 | T:0.647059      | C:0.352941     |
| chr28 | 10703393 | 2 | 36 | A:0.638889      | G:0.361111     |
| chr28 | 10703679 | 2 | 38 | C:1             | T:0            |
| chr28 | 10703918 | 2 | 40 | C:0.9           | T:0.1          |
| chr28 | 10704612 | 2 | 38 | CT:0.736842     | C:0.263158     |
| chr28 | 10705081 | 2 | 36 | G:0.777778      | A:0.222222     |
| chr28 | 10705509 | 2 | 36 | A:0.777778      | T:0.222222     |
| chr28 | 10705881 | 2 | 40 | T:0.95          | TA:0.05        |
| chr28 | 10706231 | 2 | 38 | A:0.657895      | AT:0.342105    |
| chr28 | 10706893 | 2 | 40 | C:0.625         | T:0.375        |
| chr28 | 10707391 | 2 | 32 | C:0.65625       | CAGAG:0.34375  |
| chr28 | 10707514 | 2 | 34 | T:0.705882      | C:0.294118     |
| chr28 | 10707996 | 2 | 38 | G:0.657895      | C:0.342105     |
| chr28 | 10708030 | 2 | 34 | G:0.705882      | GA:0.294118    |
| chr28 | 10708233 | 2 | 36 | C:0.666667      | T:0.333333     |
| chr28 | 10708260 | 2 | 36 | T:0.638889      | G:0.361111     |
| chr28 | 10708964 | 2 | 40 | A:0.675         | G:0.325        |
| chr28 | 10709326 | 2 | 38 | A:0.736842      | G:0.263158     |
| chr28 | 10709441 | 2 | 36 | C:0.666667      | T:0.333333     |
| chr28 | 10710218 | 2 | 34 | ATT:0.647059    | A:0.352941     |
| chr28 | 10710293 | 2 | 32 | A:0.5625        | T:0.4375       |
| chr28 | 10710621 | 2 | 36 | A:0             | G:1            |
| chr28 | 10710791 | 2 | 38 | GAC:0.789474    | G:0.210526     |
| chr28 | 10711014 | 2 | 38 | T:0.710526      | C:0.289474     |

|               |          |   |    |                    |              |
|---------------|----------|---|----|--------------------|--------------|
| chr28         | 10711234 | 3 | 28 | AT:0.357143        | A:0.321429   |
| ATT:0.321429  |          |   |    |                    |              |
| chr28         | 10711887 | 2 | 36 | C:0.777778         | T:0.222222   |
| chr28         | 10712016 | 2 | 38 | T:0.736842         | C:0.263158   |
| chr28         | 10712106 | 2 | 36 | T:1                | G:0          |
| chr28         | 10712617 | 2 | 38 | AT:0.0263158       | A:0.973684   |
| chr28         | 10712647 | 2 | 34 | C:0.764706         | CAG:0.235294 |
| chr28         | 10713398 | 2 | 32 | G:0.6875           | A:0.3125     |
| chr28         | 10713453 | 2 | 30 | A:1                | G:0          |
| chr28         | 10713526 | 2 | 32 | G:1                | C:0          |
| chr28         | 10713788 | 2 | 40 | ATCACC:0.725       | A:0.275      |
| chr28         | 10713889 | 2 | 38 | T:0.684211         | A:0.315789   |
| chr28         | 10714028 | 2 | 38 | T:1                | C:0          |
| chr28         | 10714302 | 2 | 38 | T:0.710526         | G:0.289474   |
| chr28         | 10714438 | 2 | 38 | C:0.736842         | T:0.263158   |
| chr28         | 10715462 | 2 | 40 | C:0.625            | A:0.375      |
| chr28         | 10716192 | 2 | 22 | C:0.909091         | CT:0.0909091 |
| chr28         | 10716452 | 2 | 28 | T:0.571429         | C:0.428571   |
| chr28         | 10716626 | 3 | 28 | T:0.642857         | TA:0.285714  |
| TAA:0.0714286 |          |   |    |                    |              |
| chr28         | 10717050 | 2 | 36 | G:1                | A:0          |
| chr28         | 10717141 | 2 | 34 | C:1                | A:0          |
| chr28         | 10717190 | 3 | 36 | GA:0.638889        | G:0.0833333  |
| GAA:0.277778  |          |   |    |                    |              |
| chr28         | 10717334 | 2 | 36 | C:0.666667         | G:0.333333   |
| chr28         | 10717644 | 2 | 38 | T:0                | G:1          |
| chr28         | 10717691 | 2 | 34 | A:1                | G:0          |
| chr28         | 10717743 | 2 | 36 | TA:0.666667        | T:0.333333   |
| chr28         | 10717873 | 2 | 30 | T:0.7              | C:0.3        |
| chr28         | 10719409 | 2 | 36 | G:0.75             | A:0.25       |
| chr28         | 10719846 | 2 | 36 | G:1                | T:0          |
| chr28         | 10719852 | 2 | 34 | TC:0.794118        | T:0.205882   |
| chr28         | 10719870 | 2 | 36 | A:0.944444         | C:0.0555556  |
| chr28         | 10721042 | 2 | 34 | T:0.882353         | C:0.117647   |
| chr28         | 10721098 | 2 | 34 | T:1                | C:0          |
| chr28         | 10722029 | 2 | 40 | AAGC:1             | A:0          |
| chr28         | 10722105 | 2 | 34 | C:0.588235         | CTT:0.411765 |
| chr28         | 10722278 | 2 | 40 | A:0.825            | G:0.175      |
| chr28         | 10722378 | 2 | 34 | T:0.852941         | G:0.147059   |
| chr28         | 10722820 | 2 | 38 | G:0.842105         | T:0.157895   |
| chr28         | 10723336 | 2 | 38 | A:0.894737         | T:0.105263   |
| chr28         | 10723380 | 2 | 34 | G:0.852941         | A:0.147059   |
| chr28         | 10723459 | 2 | 28 | ATT:0.785714       | A:0.214286   |
| chr28         | 10723462 | 2 | 30 | T:0.933333         | TA:0.0666667 |
| chr28         | 10723470 | 2 | 30 | T:1                | A:0          |
| chr28         | 10723992 | 2 | 34 | CCTCTCT:0.852941   | C:0.147059   |
| chr28         | 10724046 | 2 | 34 | AG:0.911765        | A:0.0882353  |
| chr28         | 10724099 | 2 | 34 | A:0.852941         | G:0.147059   |
| chr28         | 10724369 | 2 | 38 | A:0.815789         | C:0.184211   |
| chr28         | 10724901 | 2 | 32 | A:0.75             | G:0.25       |
| chr28         | 10725057 | 2 | 36 | CT:0.833333        | C:0.166667   |
| chr28         | 10725067 | 2 | 30 | TTTTTTTTC:0.833333 | T:           |
| 0.166667      |          |   |    |                    |              |
| chr28         | 10725068 | 2 | 30 | TTTTTTTTC:0.866667 | T:           |

|              |          |   |    |                              |
|--------------|----------|---|----|------------------------------|
| 0.133333     |          |   |    |                              |
| chr28        | 10725642 | 3 | 32 | CTTT:0.625 C:0.28125         |
| CTTT:0.09375 |          |   |    |                              |
| chr28        | 10725688 | 2 | 34 | CAG:0.823529 C:0.176471      |
| chr28        | 10725754 | 2 | 38 | G:0.894737 A:0.105263        |
| chr28        | 10726592 | 2 | 38 | T:0.789474 C:0.210526        |
| chr28        | 10727319 | 2 | 28 | CA:0.642857 C:0.357143       |
| chr28        | 10727335 | 2 | 26 | G:0.769231 GTA:0.230769      |
| chr28        | 10727645 | 2 | 40 | C:0.875 A:0.125              |
| chr28        | 10728488 | 2 | 40 | G:0.85 A:0.15                |
| chr28        | 10728500 | 2 | 36 | GT:0.861111 G:0.138889       |
| chr28        | 10730049 | 2 | 40 | C:0.775 T:0.225              |
| chr28        | 10730584 | 2 | 38 | A:0.789474 C:0.210526        |
| chr28        | 10731280 | 2 | 40 | T:0.85 C:0.15                |
| chr28        | 10731398 | 2 | 38 | A:0.815789 G:0.184211        |
| chr28        | 10732073 | 2 | 34 | C:0.794118 T:0.205882        |
| chr28        | 10732241 | 2 | 32 | T:0.8125 TAAATC:0.1875       |
| chr28        | 10732717 | 2 | 34 | G:0.764706 GA:0.235294       |
| chr28        | 10733060 | 2 | 32 | A:0.34375 T:0.65625          |
| chr28        | 10733105 | 2 | 36 | A:0.777778 G:0.222222        |
| chr28        | 10733286 | 2 | 28 | A:0.821429 G:0.178571        |
| chr28        | 10733508 | 2 | 38 | C:0.815789 T:0.184211        |
| chr28        | 10733562 | 2 | 30 | CTT:0.766667 C:0.233333      |
| chr28        | 10733613 | 2 | 30 | C:0.9 CAG:0.1                |
| chr28        | 10733971 | 2 | 36 | AT:0.833333 A:0.166667       |
| chr28        | 10733972 | 2 | 36 | T:1 A:0                      |
| chr28        | 10733977 | 2 | 36 | A:0.833333 T:0.166667        |
| chr28        | 10734120 | 2 | 24 | A:0.958333 G:0.0416667       |
| chr28        | 10734164 | 2 | 32 | A:0.84375 G:0.15625          |
| chr28        | 10734177 | 2 | 36 | T:0.805556 TA:0.194444       |
| chr28        | 10734403 | 2 | 36 | AAAGGC:0.888889 A:0.111111   |
| chr28        | 10734434 | 2 | 32 | G:1 A:0                      |
| chr28        | 10734596 | 2 | 34 | G:0.823529 A:0.176471        |
| chr28        | 10735011 | 2 | 36 | T:0.833333 C:0.166667        |
| chr28        | 10735131 | 2 | 40 | G:0.775 A:0.225              |
| chr28        | 10735165 | 2 | 34 | CT:0.794118 C:0.205882       |
| chr28        | 10735204 | 3 | 36 | C:0.861111 CAG:0 CAGAG:      |
| 0.138889     |          |   |    |                              |
| chr28        | 10735206 | 3 | 36 | C:0.805556 G:0.194444        |
| CAGAG:0      |          |   |    |                              |
| chr28        | 10735781 | 2 | 36 | A:0.944444 T:0.0555556       |
| chr28        | 10736087 | 2 | 36 | C:0.944444 T:0.0555556       |
| chr28        | 10737303 | 2 | 38 | G:1 C:0                      |
| chr28        | 10737520 | 2 | 38 | A:0.789474 G:0.210526        |
| chr28        | 10739199 | 2 | 30 | G:1 A:0                      |
| chr28        | 10739353 | 2 | 34 | G:1 A:0                      |
| chr28        | 10739553 | 3 | 34 | AG:1 A:0 AGG:0               |
| chr28        | 10739597 | 2 | 24 | C:0.958333 T:0.0416667       |
| chr28        | 10740077 | 2 | 40 | C:1 T:0                      |
| chr28        | 10740145 | 2 | 38 | C:0.973684 CA:0.0263158      |
| chr28        | 10740147 | 2 | 38 | A:0.763158 AT:0.236842       |
| chr28        | 10740404 | 3 | 38 | C:0.815789 CT:0.0526316      |
| CTT:0.131579 |          |   |    |                              |
| chr28        | 10740445 | 3 | 40 | CAGAGAG:0.625 C:0.125 CAGAG: |

|       |                   |    |                        |                 |
|-------|-------------------|----|------------------------|-----------------|
| 0.25  |                   |    |                        |                 |
| chr28 | 10740947 2        | 36 | T:0.944444             | C:0.0555556     |
| chr28 | 10741145 2        | 36 | T:1 G:0                |                 |
| chr28 | 10741571 2        | 38 | T:1 C:0                |                 |
| chr28 | 10741822 2        | 38 | G:1 A:0                |                 |
| chr28 | 10742324 2        | 38 | T:1 C:0                |                 |
| chr28 | 10742707 2        | 36 | C:0.888889             | CT:0.111111     |
| chr28 | 10742710 2        | 36 | T:1 TAA:0              |                 |
| chr28 | 10743089 2        | 36 | C:1 T:0                |                 |
| chr28 | 10743465 2        | 36 | C:1 T:0                |                 |
| chr28 | 10744059 2        | 36 | G:1 C:0                |                 |
| chr28 | 10744615 2        | 40 | T:0.9 C:0.1            |                 |
| chr28 | 10744908 2        | 40 | G:1 A:0                |                 |
| chr28 | 10745602 2        | 32 | T:1 C:0                |                 |
| chr28 | 10746348 2        | 36 | T:0.972222             | C:0.0277778     |
| chr28 | 10746405 2        | 38 | C:1 T:0                |                 |
| chr28 | 10746557 2        | 36 | T:0.861111             | G:0.138889      |
| chr28 | 10747138 2        | 36 | C:1 T:0                |                 |
| chr28 | 10747901 2        | 30 | A:0.9 AAAG:0.1         |                 |
| chr28 | 10748051 2        | 32 | G:0.9375 A:0.0625      |                 |
| chr28 | 10748086 2        | 32 | A:0.9375 G:0.0625      |                 |
| chr28 | 10748125 2        | 36 | G:0.75 T:0.25          |                 |
| chr28 | 10748217 2        | 28 | TA:0.678571            | T:0.321429      |
| chr28 | 10748235 2        | 38 | A:0.947368             | T:0.0526316     |
| chr28 | 10748238 2        | 38 | A:0.947368             | G:0.0526316     |
| chr28 | 10748313 2        | 34 | TCCTG:1 T:0            |                 |
| chr28 | 10748702 2        | 36 | C:1 T:0                |                 |
| chr28 | 10748721 2        | 34 | C:1 T:0                |                 |
| chr28 | 10750001 2        | 38 | A:0.868421             | G:0.131579      |
| chr28 | 10750349 2        | 40 | T:0.875 C:0.125        |                 |
| chr28 | 10750796 2        | 30 | AG:1 A:0               |                 |
| chr28 | 10750958 2        | 32 | C:0.9375 G:0.0625      |                 |
| chr28 | 10750978 3        | 34 | TAAA:0.705882          | T:0.0294118     |
|       | TAAAA:0.264706    |    |                        |                 |
| chr28 | 10751008 2        | 40 | A:1 G:0                |                 |
| chr28 | 10751976 2        | 40 | A:0.65 G:0.35          |                 |
| chr28 | 10752176 2        | 40 | A:0.875 G:0.125        |                 |
| chr28 | 10753060 2        | 36 | CAT:0.888889           | C:0.111111      |
| chr28 | 10753191 4        | 40 | AAAAAC:0.125           | A:0.075         |
|       | AAAAACAAAAC:0.775 |    | AAAAACAAAACAAAAC:0.025 |                 |
| chr28 | 10753229 3        | 40 | A:1 C:0                | AACAAC:0        |
| chr28 | 10753234 2        | 40 | C:0.9 CAAAA:0.1        |                 |
| chr28 | 10753435 2        | 40 | C:1 A:0                |                 |
| chr28 | 10753754 2        | 38 | G:1 A:0                |                 |
| chr28 | 10755296 2        | 36 | T:1 C:0                |                 |
| chr28 | 10755601 2        | 36 | A:1 C:0                |                 |
| chr28 | 10756021 2        | 38 | A:1 G:0                |                 |
| chr28 | 10756752 2        | 38 | AAAC:0.815789          | A:0.184211      |
| chr28 | 10757820 2        | 36 | T:0.861111             | C:0.138889      |
| chr28 | 10758996 2        | 34 | G:0.823529             | A:0.176471      |
| chr28 | 10760078 2        | 38 | A:0.921053             | AT:0.0789474    |
| chr28 | 10760230 2        | 40 | T:1 C:0                |                 |
| chr28 | 10761064 2        | 34 | A:0.823529             | ATAGTT:0.176471 |
| chr28 | 10761196 3        | 32 | CA:0.25 C:0.5          | CAA:0.25        |



|                                  |            |    |                   |                 |
|----------------------------------|------------|----|-------------------|-----------------|
| chr28                            | 10761567 2 | 38 | A:0.842105        |                 |
| ACAGCTATTTTTGTGTCTG:0.157895     |            |    |                   |                 |
| chr28                            | 10761664 2 | 36 | C:0.944444        | T:0.0555556     |
| chr28                            | 10761718 2 | 36 | T:1 C:0           |                 |
| chr28                            | 10761997 2 | 38 | AT:1 A:0          |                 |
| chr28                            | 10762095 2 | 32 | C:1 T:0           |                 |
| chr28                            | 10762286 4 | 34 | TAAAA:0.735294    | T:0.0294118     |
| TAA:0 TAAA:0.235294              |            |    |                   |                 |
| chr28                            | 10762464 2 | 36 | T:1 TATGTC:0      |                 |
| chr28                            | 10762491 2 | 38 | G:1 C:0           |                 |
| chr28                            | 10762522 2 | 36 | T:0.944444        | C:0.0555556     |
| chr28                            | 10763694 2 | 34 | G:1 A:0           |                 |
| chr28                            | 10763987 4 | 40 | CAGAG:0.675       | C:0.025 CAG:0.3 |
| CAGAGAG:0                        |            |    |                   |                 |
| chr28                            | 10764143 2 | 36 | T:0.944444        | C:0.0555556     |
| chr28                            | 10764367 2 | 36 | C:0.944444        | T:0.0555556     |
| chr28                            | 10764591 2 | 40 | T:0.925 C:0.075   |                 |
| chr28                            | 10765710 2 | 38 | A:0.973684        | C:0.0263158     |
| chr28                            | 10765969 2 | 38 | T:1 C:0           |                 |
| chr28                            | 10766709 4 | 36 | TAG:0.361111      | T:0.0555556     |
| TAGAG:0.555556 TAGAGAG:0.0277778 |            |    |                   |                 |
| chr28                            | 10766801 2 | 32 | C:1 T:0           |                 |
| chr28                            | 10767588 2 | 30 | A:0.966667        | G:0.0333333     |
| chr28                            | 10767617 2 | 36 | CACA:1 C:0        |                 |
| chr28                            | 10767623 2 | 36 | G:0.944444        | T:0.0555556     |
| chr28                            | 10767629 2 | 36 | C:0.944444        | A:0.0555556     |
| chr28                            | 10768234 2 | 38 | G:0.973684        | GT:0.0263158    |
| chr28                            | 10768246 2 | 38 | T:0.868421        | A:0.131579      |
| chr28                            | 10768247 2 | 38 | A:0.921053        | T:0.0789474     |
| chr28                            | 10769125 2 | 38 | AATGT:1 A:0       |                 |
| chr28                            | 10769156 2 | 40 | C:0.85 A:0.15     |                 |
| chr28                            | 10769679 2 | 38 | T:1 C:0           |                 |
| chr28                            | 10769736 2 | 38 | A:1 G:0           |                 |
| chr28                            | 10770443 2 | 38 | G:0.921053        | C:0.0789474     |
| chr28                            | 10770945 2 | 36 | A:0.888889        | G:0.111111      |
| chr28                            | 10771080 2 | 40 | A:0.875 ACT:0.125 |                 |
| chr28                            | 10772205 2 | 38 | TA:0.868421       | T:0.131579      |
| chr28                            | 10772387 3 | 30 | ATT:0.9 A:0       | AT:0.1          |
| chr28                            | 10772437 2 | 30 | CAG:0.9 C:0.1     |                 |
| chr28                            | 10772439 2 | 32 | G:1 C:0           |                 |
| chr28                            | 10772859 2 | 34 | C:0.911765        | T:0.0882353     |
| chr28                            | 10772884 2 | 38 | TA:0.815789       | T:0.184211      |
| chr28                            | 10773090 2 | 38 | T:0.421053        | C:0.578947      |
| chr28                            | 10773296 2 | 32 | C:1 T:0           |                 |
| chr28                            | 10773321 2 | 34 | C:0.705882        | CT:0.294118     |
| chr28                            | 10774112 2 | 38 | CTA:1 C:0         |                 |
| chr28                            | 10774172 3 | 40 | AAAAC:0.95        | A:0             |
| AAAACAAAC:0.05                   |            |    |                   |                 |
| chr28                            | 10774615 2 | 34 | G:1 A:0           |                 |
| chr28                            | 10774791 2 | 38 | G:0.868421        | A:0.131579      |
| chr28                            | 10774957 2 | 36 | A:1 C:0           |                 |
| chr28                            | 10775164 2 | 36 | G:0.916667        | A:0.0833333     |
| chr28                            | 10776442 2 | 36 | T:0.888889        | C:0.111111      |
| chr28                            | 10776469 2 | 38 | AT:1 A:0          |                 |

|            |          |   |    |                      |          |                  |
|------------|----------|---|----|----------------------|----------|------------------|
| chr28      | 10776941 | 2 | 32 | A:1                  | T:0      |                  |
| chr28      | 10777379 | 2 | 34 | C:1                  | T:0      |                  |
| chr28      | 10777681 | 2 | 34 | A:0.941176           |          | AAAAAG:0.0588235 |
| chr28      | 10777772 | 2 | 36 | C:0.861111           |          | T:0.138889       |
| chr28      | 10777871 | 2 | 40 | T:0.875              | A:0.125  |                  |
| chr28      | 10778270 | 2 | 34 | GA:0.970588          |          | G:0.0294118      |
| chr28      | 10778309 | 2 | 38 | C:0.921053           |          | T:0.0789474      |
| chr28      | 10778666 | 2 | 36 | C:1                  | T:0      |                  |
| chr28      | 10779001 | 2 | 32 | C:1                  | T:0      |                  |
| chr28      | 10779043 | 2 | 32 | C:1                  | T:0      |                  |
| chr28      | 10779220 | 2 | 38 | C:1                  | CT:0     |                  |
| chr28      | 10779294 | 2 | 36 | C:0.916667           |          | T:0.0833333      |
| chr28      | 10779582 | 2 | 36 | G:0.944444           |          | T:0.0555556      |
| chr28      | 10779588 | 2 | 36 | G:1                  | T:0      |                  |
| chr28      | 10780909 | 2 | 32 | TA:0.9375            |          | T:0.0625         |
| chr28      | 10780910 | 3 | 32 | ATT:0.875            |          | A:0.03125        |
| AT:0.09375 |          |   |    |                      |          |                  |
| chr28      | 10781368 | 2 | 36 | C:1                  | T:0      |                  |
| chr28      | 10781582 | 2 | 30 | TTC:0.966667         |          | T:0.0333333      |
| chr28      | 10781588 | 2 | 30 | T:0.9                | C:0.1    |                  |
| chr28      | 10782031 | 2 | 34 | C:0.911765           |          | T:0.0882353      |
| chr28      | 10782115 | 2 | 30 | T:0.866667           |          | TA:0.133333      |
| chr28      | 10782176 | 2 | 30 | T:0.9                | TCTG:0.1 |                  |
| chr28      | 10782912 | 2 | 36 | A:0.916667           |          | G:0.0833333      |
| chr28      | 10783073 | 2 | 30 | T:1                  | TA:0     |                  |
| chr28      | 10783138 | 2 | 16 | G:1                  | A:0      |                  |
| chr28      | 10783392 | 2 | 28 | G:1                  | GC:0     |                  |
| chr28      | 10783837 | 2 | 30 | C:1                  | T:0      |                  |
| chr28      | 10784018 | 2 | 24 | G:1                  | T:0      |                  |
| chr28      | 10784077 | 2 | 16 | G:1                  | C:0      |                  |
| chr28      | 10785442 | 2 | 28 | G:1                  | A:0      |                  |
| chr28      | 10786021 | 2 | 34 | G:0.941176           |          | A:0.0588235      |
| chr28      | 10786049 | 2 | 32 | T:1                  | G:0      |                  |
| chr28      | 10786062 | 2 | 34 | G:0.882353           |          | T:0.117647       |
| chr28      | 10786076 | 2 | 32 | G:0                  | T:1      |                  |
| chr28      | 10786136 | 2 | 40 | C:0                  | G:1      |                  |
| chr28      | 10786220 | 2 | 36 | T:1                  | C:0      |                  |
| chr28      | 10786342 | 2 | 34 | G:1                  | A:0      |                  |
| chr28      | 10786343 | 2 | 34 | G:1                  | A:0      |                  |
| chr28      | 10786477 | 2 | 36 | G:1                  | T:0      |                  |
| chr28      | 10786561 | 2 | 38 | C:0.947368           |          | T:0.0526316      |
| chr28      | 10786564 | 2 | 38 | G:1                  | T:0      |                  |
| chr28      | 10786946 | 2 | 36 | G:1                  | A:0      |                  |
| chr28      | 10787158 | 2 | 38 | T:1                  | C:0      |                  |
| chr28      | 10787239 | 2 | 38 | CTTTCT:0.0263158     |          | C:0.973684       |
| chr28      | 10787349 | 2 | 18 | G:0.111111           |          | T:0.888889       |
| chr28      | 10787915 | 2 | 38 | GC:0                 | G:1      |                  |
| chr28      | 10788645 | 2 | 34 | C:0                  | G:1      |                  |
| chr28      | 10788875 | 2 | 38 | AGCATCCTGCC:0.947368 |          | A:               |
| 0.0526316  |          |   |    |                      |          |                  |
| chr28      | 10788888 | 2 | 38 | A:1                  | G:0      |                  |
| chr28      | 10789147 | 2 | 36 | C:0.944444           |          | T:0.0555556      |
| chr28      | 10789640 | 2 | 40 | CA:0.975             | C:0.025  |                  |
| chr28      | 10789643 | 2 | 40 | TGGGC:0.975          |          | T:0.025          |

|                                  |          |   |    |                       |              |               |
|----------------------------------|----------|---|----|-----------------------|--------------|---------------|
| chr28                            | 10789652 | 2 | 40 | C:0.975               | T:0.025      |               |
| chr28                            | 10789771 | 2 | 36 | G:0.777778            |              | A:0.222222    |
| chr28                            | 10789774 | 2 | 36 | G:1                   | A:0          |               |
| chr28                            | 10790103 | 2 | 38 | T:0.842105            |              | C:0.157895    |
| chr28                            | 10790171 | 2 | 36 | C:1                   | T:0          |               |
| chr28                            | 10790236 | 3 | 40 | A:0.825               | AGATG:0.175  |               |
| AGATGGATG:0                      |          |   |    |                       |              |               |
| chr28                            | 10790365 | 2 | 38 | ATTT:0.947368         |              | A:0.0526316   |
| chr28                            | 10790372 | 2 | 40 | T:0.9                 | TA:0.1       |               |
| chr28                            | 10790396 | 2 | 34 | G:0.852941            |              | A:0.147059    |
| chr28                            | 10790601 | 2 | 32 | G:0.96875             |              | C:0.03125     |
| chr28                            | 10790641 | 2 | 36 | G:1                   | A:0          |               |
| chr28                            | 10790672 | 2 | 40 | G:1                   | A:0          |               |
| chr28                            | 10791027 | 2 | 32 | A:0.84375             |              | G:0.15625     |
| chr28                            | 10791097 | 2 | 40 | A:1                   | G:0          |               |
| chr28                            | 10791288 | 2 | 28 | G:1                   | GTGCTAGAGC:0 |               |
| chr28                            | 10791360 | 2 | 20 | T:0                   | C:1          |               |
| chr28                            | 10791635 | 2 | 36 | TAAAAAAA:1            |              | T:0           |
| chr28                            | 10791636 | 2 | 36 | A:0.888889            |              | T:0.111111    |
| chr28                            | 10791651 | 2 | 36 | A:1                   | T:0          |               |
| chr28                            | 10791925 | 2 | 38 | CT:0.105263           |              | C:0.894737    |
| chr28                            | 10791931 | 2 | 38 | A:1                   | T:0          |               |
| chr28                            | 10792362 | 2 | 38 | G:1                   | A:0          |               |
| chr28                            | 10792475 | 2 | 38 | C:0                   | T:1          |               |
| chr28                            | 10792513 | 2 | 36 | G:1                   | A:0          |               |
| chr28                            | 10792605 | 2 | 32 | C:0.90625             |              | CATGA:0.09375 |
| chr28                            | 10792682 | 2 | 36 | G:1                   | A:0          |               |
| chr28                            | 10792694 | 4 | 38 | GCACA:0.157895        |              | G:0.0526316   |
| GCA:0.763158 GCACACACA:0.0263158 |          |   |    |                       |              |               |
| chr28                            | 10792696 | 2 | 38 | A:1                   | G:0          |               |
| chr28                            | 10792698 | 2 | 38 | A:1                   | G:0          |               |
| chr28                            | 10792700 | 2 | 38 | A:1                   | G:0          |               |
| chr28                            | 10792702 | 2 | 38 | A:1                   | G:0          |               |
| chr28                            | 10792912 | 2 | 34 | C:0.0882353           |              | A:0.911765    |
| chr28                            | 10792915 | 2 | 36 | GT:1                  | G:0          |               |
| chr28                            | 10793232 | 2 | 34 | G:1                   | A:0          |               |
| chr28                            | 10793344 | 2 | 30 | G:0.933333            |              | GA:0.0666667  |
| chr28                            | 10793715 | 2 | 38 | A:0                   | C:1          |               |
| chr28                            | 10793717 | 2 | 38 | A:1                   | C:0          |               |
| chr28                            | 10793778 | 2 | 40 | A:0.95                | G:0.05       |               |
| chr28                            | 10794281 | 2 | 38 | C:0.0526316           |              | T:0.947368    |
| chr28                            | 10794711 | 2 | 36 | ACCC:0.916667         |              | A:0.0833333   |
| chr28                            | 10794779 | 2 | 32 | C:1                   | T:0          |               |
| chr28                            | 10796986 | 2 | 36 | A:0                   | G:1          |               |
| chr28                            | 10797230 | 2 | 34 | A:0                   | G:1          |               |
| chr28                            | 10797858 | 2 | 38 | AGGGTTGGGGC:0.0526316 |              | A:0.947368    |
| 0.947368                         |          |   |    |                       |              |               |
| chr28                            | 10798030 | 2 | 38 | T:0                   | C:1          |               |
| chr28                            | 10798522 | 2 | 38 | G:0.105263            |              | A:0.894737    |
| chr28                            | 10798608 | 2 | 38 | A:0                   | C:1          |               |
| chr28                            | 10798699 | 2 | 34 | C:1                   | T:0          |               |
| chr28                            | 10798759 | 2 | 38 | T:0.894737            |              | C:0.105263    |
| chr28                            | 10798910 | 2 | 38 | TG:0.0789474          |              | T:0.921053    |
| chr28                            | 10798916 | 2 | 38 | GCACC:0.921053        |              | G:0.0789474   |

|       |            |    |                              |                   |
|-------|------------|----|------------------------------|-------------------|
| chr28 | 10798919 2 | 38 | C:0.0789474                  | CA:0.921053       |
| chr28 | 10799285 2 | 36 | C:0.111111                   | A:0.888889        |
| chr28 | 10799467 2 | 22 | C:0.0454545                  | T:0.954545        |
| chr28 | 10799500 2 | 26 | T:0 C:1                      |                   |
| chr28 | 10799935 2 | 38 | T:0.947368                   | G:0.0526316       |
| chr28 | 10800458 2 | 36 | C:1 T:0                      |                   |
| chr28 | 10800816 2 | 38 | T:0.921053                   | TAA:0.0789474     |
| chr28 | 10800817 2 | 38 | GCT:0.921053                 | G:0.0789474       |
| chr28 | 10800836 2 | 38 | G:0.973684                   | A:0.0263158       |
| chr28 | 10801389 2 | 40 | G:1 T:0                      |                   |
| chr28 | 10801683 2 | 38 | G:0.0526316                  | A:0.947368        |
| chr28 | 10801900 2 | 36 | G:1 A:0                      |                   |
| chr28 | 10802217 2 | 38 | AAGAG:1 A:0                  |                   |
| chr28 | 10802229 2 | 38 | G:1 A:0                      |                   |
| chr28 | 10803019 2 | 36 | C:0.944444                   | T:0.0555556       |
| chr28 | 10803956 2 | 38 | T:0.894737                   | G:0.105263        |
| chr28 | 10804116 2 | 36 | G:1 A:0                      |                   |
| chr28 | 10804198 2 | 34 | CTG:0.941176                 | C:0.0588235       |
| chr28 | 10804280 2 | 38 | TA:0.973684                  | T:0.0263158       |
| chr28 | 10805161 2 | 40 | A:0.95 G:0.05                |                   |
| chr28 | 10805332 2 | 40 | T:1 TG:0                     |                   |
| chr28 | 10805334 2 | 40 | A:1 AGACAAAAGAAGGAGACAGC:0   |                   |
| chr28 | 10805337 2 | 40 | GCTCTCTC:1                   | G:0               |
| chr28 | 10805458 2 | 40 | G:1 A:0                      |                   |
| chr28 | 10805484 2 | 38 | C:0.921053                   | T:0.0789474       |
| chr28 | 10805708 2 | 36 | A:0.0833333                  | T:0.916667        |
| chr28 | 10805938 2 | 32 | C:0.90625                    | T:0.09375         |
| chr28 | 10806164 2 | 28 | T:1 C:0                      |                   |
| chr28 | 10807229 2 | 30 | A:1 G:0                      |                   |
| chr28 | 10807334 2 | 36 | G:0.916667                   | A:0.0833333       |
| chr28 | 10807952 2 | 38 | CT:1 C:0                     |                   |
| chr28 | 10808716 2 | 38 | G:0 T:1                      |                   |
| chr28 | 10808723 2 | 34 | C:0.205882                   | CTCTT:0.794118    |
| chr28 | 10808727 2 | 38 | T:0.973684                   | TTCTTTC:0.0263158 |
| chr28 | 10808788 2 | 38 | G:1 A:0                      |                   |
| chr28 | 10810294 2 | 40 | G:1 GAAAAAAAAAAAAAAAAAAAAA:0 |                   |
| chr28 | 10810296 2 | 40 | A:1 AAAATCTGATGAGGT:0        |                   |
| chr28 | 10810503 2 | 36 | G:0.916667                   | A:0.0833333       |
| chr28 | 10810518 2 | 34 | G:0.911765                   | T:0.0882353       |
| chr28 | 10810680 2 | 40 | C:0.075 T:0.925              |                   |
| chr28 | 10810910 2 | 38 | T:0.105263                   | C:0.894737        |
| chr28 | 10811208 2 | 38 | GT:0.0789474                 | G:0.921053        |
| chr28 | 10811217 2 | 38 | C:0.0789474                  | T:0.921053        |
| chr28 | 10811295 2 | 38 | G:0.0526316                  | C:0.947368        |
| chr28 | 10811860 2 | 36 | A:0.944444                   | G:0.0555556       |
| chr28 | 10811995 2 | 34 | G:0.941176                   | T:0.0588235       |
| chr28 | 10812105 2 | 36 | A:1 G:0                      |                   |
| chr28 | 10812120 2 | 38 | G:0.947368                   | A:0.0526316       |
| chr28 | 10812280 2 | 34 | T:0 C:1                      |                   |
| chr28 | 10812446 2 | 38 | C:0.0789474                  | T:0.921053        |
| chr28 | 10812841 2 | 38 | G:0.105263                   | A:0.894737        |
| chr28 | 10812961 2 | 36 | A:0.888889                   | G:0.111111        |
| chr28 | 10813514 2 | 36 | T:0.111111                   | A:0.888889        |
| chr28 | 10814023 2 | 36 | A:0.861111                   | G:0.138889        |

|                            |          |   |    |                    |              |
|----------------------------|----------|---|----|--------------------|--------------|
| chr28                      | 10814099 | 2 | 38 | AT:0.894737        | A:0.105263   |
| chr28                      | 10814148 | 2 | 38 | C:0.789474         | CT:0.210526  |
| chr28                      | 10814149 | 2 | 38 | C:0.210526         | T:0.789474   |
| chr28                      | 10814150 | 3 | 38 | C:0.657895         | T:0.210526   |
| CTT:0.131579               |          |   |    |                    |              |
| chr28                      | 10814876 | 2 | 32 | C:0.0625           | G:0.9375     |
| chr28                      | 10815237 | 2 | 36 | G:0.0833333        | A:0.916667   |
| chr28                      | 10815616 | 2 | 36 | G:0.916667         | T:0.0833333  |
| chr28                      | 10815779 | 2 | 34 | CG:1               | C:0          |
| chr28                      | 10815825 | 4 | 38 | CCTCTCTCT:0.184211 | C:           |
| 0.815789 CCT:0 CTTCTCTCT:0 |          |   |    |                    |              |
| chr28                      | 10815846 | 2 | 32 | C:1                | G:0          |
| chr28                      | 10815848 | 2 | 30 | C:0.2              | G:0.8        |
| chr28                      | 10815896 | 2 | 36 | T:0                | TA:1         |
| chr28                      | 10816356 | 2 | 34 | A:0.911765         | G:0.0882353  |
| chr28                      | 10816447 | 2 | 38 | G:1                | A:0          |
| chr28                      | 10816779 | 2 | 38 | G:1                | A:0          |
| chr28                      | 10816995 | 2 | 36 | G:0                | A:1          |
| chr28                      | 10817370 | 2 | 32 | A:0.9375           | G:0.0625     |
| chr28                      | 10817535 | 2 | 40 | G:1                | T:0          |
| chr28                      | 10818450 | 2 | 38 | A:1                | G:0          |
| chr28                      | 10819367 | 2 | 36 | A:0.944444         | G:0.0555556  |
| chr28                      | 10819539 | 2 | 38 | T:0.947368         | C:0.0526316  |
| chr28                      | 10819736 | 2 | 36 | C:1                | CG:0         |
| chr28                      | 10819935 | 3 | 32 | TA:0.53125         | T:0.28125    |
| TAA:0.1875                 |          |   |    |                    |              |
| chr28                      | 10820648 | 2 | 32 | C:1                | T:0          |
| chr28                      | 10821105 | 2 | 36 | A:0.888889         | G:0.111111   |
| chr28                      | 10821281 | 2 | 34 | G:0.0588235        | A:0.941176   |
| chr28                      | 10821414 | 2 | 36 | G:0.944444         | A:0.0555556  |
| chr28                      | 10821971 | 2 | 38 | C:1                | T:0          |
| chr28                      | 10822368 | 2 | 38 | T:0.0526316        | C:0.947368   |
| chr28                      | 10822387 | 2 | 38 | C:0                | T:1          |
| chr28                      | 10823190 | 2 | 36 | T:0.916667         | C:0.0833333  |
| chr28                      | 10823207 | 2 | 30 | T:0.933333         | TA:0.0666667 |
| chr28                      | 10823751 | 2 | 38 | T:0                | A:1          |
| chr28                      | 10823975 | 2 | 34 | G:1                | A:0          |
| chr28                      | 10824004 | 2 | 38 | C:0                | A:1          |
| chr28                      | 10824116 | 2 | 34 | T:0.941176         | C:0.0588235  |
| chr28                      | 10824189 | 2 | 40 | G:0.975            | A:0.025      |
| chr28                      | 10824896 | 2 | 34 | T:1                | C:0          |
| chr28                      | 10825145 | 2 | 28 | A:0.928571         | C:0.0714286  |
| chr28                      | 10825361 | 2 | 30 | G:1                | A:0          |
| chr28                      | 10825928 | 2 | 36 | A:0.888889         | G:0.111111   |
| chr28                      | 10826445 | 2 | 36 | T:0.0277778        | C:0.972222   |
| chr28                      | 10826488 | 2 | 36 | C:0.972222         | T:0.0277778  |
| chr28                      | 10826717 | 2 | 36 | G:0                | A:1          |
| chr28                      | 10827088 | 2 | 36 | T:0                | C:1          |
| chr28                      | 10827157 | 2 | 36 | G:0.0833333        | A:0.916667   |
| chr28                      | 10827382 | 2 | 36 | T:0.0833333        | C:0.916667   |
| chr28                      | 10827768 | 2 | 38 | CATTT:0.842105     | C:0.157895   |
| chr28                      | 10827809 | 2 | 36 | G:1                | A:0          |
| chr28                      | 10828635 | 2 | 40 | T:0.925            | C:0.075      |
| chr28                      | 10829371 | 2 | 38 | G:1                | A:0          |

|                          |            |    |                    |                            |
|--------------------------|------------|----|--------------------|----------------------------|
| chr28                    | 10830034 2 | 38 | T:0.973684         | TA:0.0263158               |
| chr28                    | 10830214 2 | 34 | T:1                | TA:0                       |
| chr28                    | 10830246 2 | 32 | G:1                | A:0                        |
| chr28                    | 10830435 2 | 38 | A:1                | C:0                        |
| chr28                    | 10830652 2 | 36 | T:0.888889         | C:0.111111                 |
| chr28                    | 10831011 2 | 36 | G:1                | A:0                        |
| chr28                    | 10831614 2 | 36 | T:0.944444         | G:0.0555556                |
| chr28                    | 10831690 2 | 34 | G:0.852941         | A:0.147059                 |
| chr28                    | 10832068 2 | 34 | C:1                | T:0                        |
| chr28                    | 10832590 2 | 36 | TAAAAA:0.638889    | T:0.361111                 |
| chr28                    | 10833107 2 | 36 | C:0.861111         | A:0.138889                 |
| chr28                    | 10833406 2 | 34 | G:0.911765         | A:0.0882353                |
| chr28                    | 10833643 2 | 36 | A:1                | C:0                        |
| chr28                    | 10833794 2 | 34 | G:0.911765         | A:0.0882353                |
| chr28                    | 10833839 3 | 40 | G:0.4              | GTTCTTTTCTTTTCTT:0.6       |
| GTTCTTTTCTTTTCTTTTCTT:0  |            |    |                    |                            |
| chr28                    | 10833871 2 | 40 | T:0.925            | TC:0.075                   |
| chr28                    | 10833872 2 | 40 | T:0.925            | TTTTCTTTTCTTTTCTTTTC:0.075 |
| chr28                    | 10834198 2 | 34 | A:0.911765         | T:0.0882353                |
| chr28                    | 10834480 2 | 24 | G:0.833333         | T:0.166667                 |
| chr28                    | 10835886 2 | 36 | T:1                | G:0                        |
| chr28                    | 10836669 2 | 36 | G:0                | GC:1                       |
| chr28                    | 10837170 2 | 34 | G:0.911765         | A:0.0882353                |
| chr28                    | 10837946 2 | 38 | G:1                | T:0                        |
| chr28                    | 10838357 2 | 36 | G:1                | C:0                        |
| chr28                    | 10838463 2 | 34 | T:1                | C:0                        |
| chr28                    | 10838727 2 | 36 | C:1                | T:0                        |
| chr28                    | 10839018 2 | 38 | AG:0.921053        | A:0.0789474                |
| chr28                    | 10839579 2 | 34 | C:0.0588235        | T:0.941176                 |
| chr28                    | 10839669 2 | 24 | A:1                | G:0                        |
| chr28                    | 10839670 2 | 24 | T:1                | G:0                        |
| chr28                    | 10839780 3 | 36 | TTAAATAAA:0.388889 | T:                         |
| 0.527778 TTAAA:0.0833333 |            |    |                    |                            |
| chr28                    | 10840014 2 | 32 | G:0                | C:1                        |
| chr28                    | 10840673 2 | 36 | G:0.888889         | A:0.111111                 |
| chr28                    | 10840824 2 | 38 | A:0                | T:1                        |
| chr28                    | 10840924 2 | 32 | C:1                | T:0                        |
| chr28                    | 10841198 2 | 34 | G:1                | A:0                        |
| chr28                    | 10841364 2 | 38 | T:0                | A:1                        |
| chr28                    | 10841596 2 | 34 | T:1                | C:0                        |
| chr28                    | 10842018 2 | 36 | A:1                | C:0                        |
| chr28                    | 10842498 2 | 32 | T:0                | C:1                        |
| chr28                    | 10843285 2 | 38 | G:1                | A:0                        |
| chr28                    | 10843350 2 | 30 | A:0.9              | G:0.1                      |
| chr28                    | 10843359 2 | 32 | T:1                | G:0                        |
| chr28                    | 10843728 2 | 38 | T:0.921053         | C:0.0789474                |
| chr28                    | 10843855 2 | 36 | G:1                | C:0                        |
| chr28                    | 10843924 2 | 36 | T:1                | C:0                        |
| chr28                    | 10843962 2 | 38 | G:1                | A:0                        |
| chr28                    | 10844288 2 | 36 | G:1                | C:0                        |
| chr28                    | 10844333 2 | 40 | GACTGAGAGT:0.95    | G:0.05                     |
| chr28                    | 10844335 2 | 40 | C:0.15             | CT:0.85                    |
| chr28                    | 10844341 2 | 40 | GT:0.15            | G:0.85                     |

|             |          |   |    |                |          |              |
|-------------|----------|---|----|----------------|----------|--------------|
| chr28       | 10844570 | 2 | 32 | A:0            | G:1      |              |
| chr28       | 10844616 | 2 | 36 | A:0            | G:1      |              |
| chr28       | 10844668 | 2 | 36 | CT:0.0555556   |          | C:0.944444   |
| chr28       | 10844683 | 3 | 36 | ATT:0.111111   |          | A:0.888889   |
| AT:0        |          |   |    |                |          |              |
| chr28       | 10844687 | 2 | 36 | T:1            | A:0      |              |
| chr28       | 10844769 | 2 | 34 | A:0.0882353    |          | ACT:0.911765 |
| chr28       | 10844795 | 2 | 32 | T:0            | C:1      |              |
| chr28       | 10844839 | 2 | 34 | C:1            | T:0      |              |
| chr28       | 10844863 | 2 | 32 | A:0            | G:1      |              |
| chr28       | 10844929 | 2 | 40 | C:0            | T:1      |              |
| chr28       | 10845417 | 2 | 34 | C:1            | T:0      |              |
| chr28       | 10845589 | 2 | 38 | T:1            | C:0      |              |
| chr28       | 10846118 | 3 | 36 | CTT:0.0833333  |          | C:0.0277778  |
| CT:0.888889 |          |   |    |                |          |              |
| chr28       | 10846650 | 2 | 36 | T:1            | TAGG:0   |              |
| chr28       | 10846675 | 2 | 38 | C:1            | T:0      |              |
| chr28       | 10846928 | 2 | 36 | G:0.166667     |          | T:0.833333   |
| chr28       | 10847235 | 2 | 38 | G:1            | A:0      |              |
| chr28       | 10847410 | 2 | 40 | G:1            | C:0      |              |
| chr28       | 10847418 | 2 | 40 | A:0.2          | G:0.8    |              |
| chr28       | 10847584 | 2 | 34 | T:0            | A:1      |              |
| chr28       | 10847679 | 2 | 0  | CAG:-nan       | C:-nan   |              |
| chr28       | 10848111 | 2 | 32 | G:0            | A:1      |              |
| chr28       | 10848174 | 2 | 30 | T:0.233333     |          | C:0.766667   |
| chr28       | 10848225 | 2 | 34 | G:0            | A:1      |              |
| chr28       | 10848239 | 2 | 32 | C:1            | A:0      |              |
| chr28       | 10848338 | 2 | 30 | T:1            | TA:0     |              |
| chr28       | 10848394 | 2 | 32 | T:1            | A:0      |              |
| chr28       | 10848395 | 2 | 32 | T:1            | A:0      |              |
| chr28       | 10848499 | 2 | 22 | A:0.363636     |          | T:0.636364   |
| chr28       | 10849025 | 2 | 26 | GTTTT:0        | G:1      |              |
| chr28       | 10849030 | 2 | 26 | T:0            | TGCCGC:1 |              |
| chr28       | 10849039 | 2 | 26 | T:1            | C:0      |              |
| chr28       | 10849065 | 2 | 26 | GTTT:1         | G:0      |              |
| chr28       | 10849066 | 2 | 20 | T:0            | G:1      |              |
| chr28       | 10849067 | 2 | 20 | TTTT:0         | TCC:1    |              |
| chr28       | 10849069 | 2 | 26 | T:1            | G:0      |              |
| chr28       | 10849070 | 2 | 26 | T:1            | TCC:0    |              |
| chr28       | 10849276 | 2 | 36 | T:1            | C:0      |              |
| chr28       | 10849368 | 2 | 38 | C:0.789474     |          | G:0.210526   |
| chr28       | 10849447 | 2 | 38 | G:0.236842     |          | A:0.763158   |
| chr28       | 10849747 | 2 | 36 | C:1            | T:0      |              |
| chr28       | 10850041 | 2 | 40 | A:0.275        | G:0.725  |              |
| chr28       | 10850060 | 2 | 38 | T:0            | C:1      |              |
| chr28       | 10850147 | 2 | 36 | CACTG:0.222222 |          | C:0.777778   |
| chr28       | 10850252 | 2 | 38 | G:1            | A:0      |              |
| chr28       | 10850338 | 2 | 34 | G:0.176471     |          | T:0.823529   |
| chr28       | 10850349 | 2 | 34 | G:0.823529     |          | C:0.176471   |
| chr28       | 10850419 | 2 | 38 | T:0            | C:1      |              |
| chr28       | 10850681 | 2 | 38 | T:0            | G:1      |              |
| chr28       | 10850687 | 2 | 38 | T:0            | C:1      |              |
| chr28       | 10850927 | 2 | 34 | G:0.676471     |          | C:0.323529   |
| chr28       | 10850955 | 2 | 34 | A:0.323529     |          | G:0.676471   |

|                                                                   |                        |    |                            |              |
|-------------------------------------------------------------------|------------------------|----|----------------------------|--------------|
| chr28                                                             | 10850988 2             | 36 | C:0.333333                 | T:0.666667   |
| chr28                                                             | 10851005 2             | 36 | G:1 A:0                    |              |
| chr28                                                             | 10851045 2             | 34 | C:0.235294                 | T:0.764706   |
| chr28                                                             | 10851749 2             | 36 | TA:0 T:1                   |              |
| chr28                                                             | 10851825 2             | 36 | T:0.861111                 | TA:0.138889  |
| chr28                                                             | 10851934 2             | 38 | A:0.184211                 | G:0.815789   |
| chr28                                                             | 10851940 2             | 38 | A:1 G:0                    |              |
| chr28                                                             | 10852366 2             | 30 | A:0 G:1                    |              |
| chr28                                                             | 10852426 2             | 32 | T:0 C:1                    |              |
| chr28                                                             | 10852547 2             | 38 | G:0.157895                 | A:0.842105   |
| chr28                                                             | 10852562 2             | 38 | C:0.157895                 | T:0.842105   |
| chr28                                                             | 10852702 2             | 34 | C:0.941176                 | T:0.0588235  |
| chr28                                                             | 10853084 2             | 32 | C:0.875 T:0.125            |              |
| chr28                                                             | 10853383 2             | 40 | G:1 A:0                    |              |
| chr28                                                             | 10853503 2             | 40 |                            |              |
| TGAGCCACCAGAGCCACCCAAGCCATCAGAGCTACCCAAGCCATCCGAGCCACCCAAGCCACCA: |                        |    |                            |              |
| 0.15                                                              | T:0.85                 |    |                            |              |
| chr28                                                             | 10853651 2             | 36 | T:0 A:1                    |              |
| chr28                                                             | 10853841 2             | 38 | G:0.868421                 | A:0.131579   |
| chr28                                                             | 10854052 2             | 40 | TCAAGTGGCCC:0.875          | T:0.125      |
| chr28                                                             | 10854055 2             | 40 | A:0.125 T:0.875            |              |
| chr28                                                             | 10854064 2             | 40 | TGG:0.875                  | T:0.125      |
| chr28                                                             | 10854067 2             | 40 | C:0.875 A:0.125            |              |
| chr28                                                             | 10854492 2             | 34 | G:0.176471                 | C:0.823529   |
| chr28                                                             | 10854518 2             | 34 | T:0.941176                 | TC:0.0588235 |
| chr28                                                             | 10854706 2             | 34 | C:0.823529                 | T:0.176471   |
| chr28                                                             | 10854778 2             | 36 | A:1 G:0                    |              |
| chr28                                                             | 10854837 2             | 32 | C:0.90625                  | T:0.09375    |
| chr28                                                             | 10855201 4             | 36 | TTATCTATCTATC:0.361111     | T:           |
| 0.333333                                                          | TTATCTATC:0.0277778    |    | TTATCTATCTATCTATC:0.277778 |              |
| chr28                                                             | 10855616 2             | 36 | A:0.194444                 | G:0.805556   |
| chr28                                                             | 10855998 2             | 40 | G:0.8 GGA:0.2              |              |
| chr28                                                             | 10856001 2             | 40 | ATCT:0.8 A:0.2             |              |
| chr28                                                             | 10856008 2             | 40 | AAAAAAGTTT:0.8             | A:0.2        |
| chr28                                                             | 10856018 2             | 40 | CAA:0.8 C:0.2              |              |
| chr28                                                             | 10856024 2             | 40 | GACAAAATTCAAAGTCTGCA:0.8   | G:0.2        |
| chr28                                                             | 10856047 2             | 40 | AGT:0.8 A:0.2              |              |
| chr28                                                             | 10856051 2             | 40 | TAG:0.8 T:0.2              |              |
| chr28                                                             | 10856054 2             | 40 | T:0.8 TAA:0.2              |              |
| chr28                                                             | 10856060 2             | 40 | T:0.8 A:0.2                |              |
| chr28                                                             | 10856061 2             | 40 | GTT:0.8 G:0.2              |              |
| chr28                                                             | 10856067 2             | 40 | T:0.8 TAA:0.2              |              |
| chr28                                                             | 10856069 2             | 40 | T:0.8 A:0.2                |              |
| chr28                                                             | 10856605 2             | 36 | GC:0.111111                | G:0.888889   |
| chr28                                                             | 10856834 2             | 32 | G:0.03125                  | A:0.96875    |
| chr28                                                             | 10856891 2             | 40 | C:1 T:0                    |              |
| chr28                                                             | 10857213 4             | 40 | GGAGAGAGAGAGAGA:0.525      | G:0.05       |
| GGAGAGAGAGA:0.175                                                 | GGAGAGAGAGAGAGAGA:0.25 |    |                            |              |
| chr28                                                             | 10857820 2             | 32 | C:0.90625                  | CT:0.09375   |
| chr28                                                             | 10857822 2             | 28 | TC:0.357143                | T:0.642857   |
| chr28                                                             | 10858452 2             | 36 | G:1 A:0                    |              |
| chr28                                                             | 10858753 2             | 36 | G:1 A:0                    |              |
| chr28                                                             | 10859031 2             | 40 | C:1 A:0                    |              |
| chr28                                                             | 10859145 2             | 38 | G:0.921053                 | A:0.0789474  |



|                               |          |   |    |                    |              |
|-------------------------------|----------|---|----|--------------------|--------------|
| chr28                         | 10859432 | 2 | 38 | T:0.131579         | C:0.868421   |
| chr28                         | 10859500 | 3 | 34 | C:0.235294         | CCT:0.764706 |
| CCTCT:0                       |          |   |    |                    |              |
| chr28                         | 10859548 | 3 | 34 | T:0.0882353        | TAA:0.794118 |
| TAAA:0.117647                 |          |   |    |                    |              |
| chr28                         | 10859591 | 2 | 38 | A:0.0789474        | G:0.921053   |
| chr28                         | 10859789 | 3 | 40 | GT:0.625           | G:0          |
| chr28                         | 10859873 | 2 | 40 | C:0.075            | G:0.925      |
| chr28                         | 10859994 | 2 | 38 | A:0.973684         | G:0.0263158  |
| chr28                         | 10860062 | 2 | 38 | A:0.947368         | G:0.0526316  |
| chr28                         | 10860259 | 2 | 34 | CAGAAAAA:0.0294118 | C:           |
| 0.970588                      |          |   |    |                    |              |
| chr28                         | 10860267 | 2 | 34 | TG:0.0294118       | T:0.970588   |
| chr28                         | 10860770 | 2 | 38 | A:0                | G:1          |
| chr28                         | 10861029 | 2 | 38 | G:1                | A:0          |
| chr28                         | 10861190 | 2 | 28 | G:1                | C:0          |
| chr28                         | 10861553 | 2 | 34 | G:0.0294118        | A:0.970588   |
| chr28                         | 10861598 | 2 | 36 | C:1                | T:0          |
| chr28                         | 10861930 | 2 | 32 | G:0.03125          | A:0.96875    |
| chr28                         | 10862118 | 2 | 36 | C:0.972222         | T:0.0277778  |
| chr28                         | 10862629 | 2 | 36 | A:0                | G:1          |
| chr28                         | 10862731 | 2 | 32 | G:1                | T:0          |
| chr28                         | 10862999 | 2 | 34 | C:0.941176         | T:0.0588235  |
| chr28                         | 10863039 | 2 | 38 | A:1                | T:0          |
| chr28                         | 10863951 | 2 | 40 | C:1                | T:0          |
| chr28                         | 10863957 | 2 | 40 | C:0.075            | T:0.925      |
| chr28                         | 10864055 | 2 | 38 | A:1                | G:0          |
| chr28                         | 10864420 | 2 | 36 | GT:0.0555556       | G:0.944444   |
| chr28                         | 10864676 | 2 | 36 | T:0                | A:1          |
| chr28                         | 10864720 | 2 | 32 | A:0                | T:1          |
| chr28                         | 10865160 | 2 | 38 | TAC:0.0789474      | T:0.921053   |
| chr28                         | 10865211 | 3 | 36 | GT:0.0833333       | G:0.916667   |
| GTT:0                         |          |   |    |                    |              |
| chr28                         | 10865255 | 2 | 34 | C:0                | A:1          |
| chr28                         | 10865768 | 4 | 36 | C:0                | CT:0.138889  |
| 0.805556 CTTT:0.0555556       |          |   |    |                    |              |
| chr28                         | 10865823 | 2 | 38 | A:1                | AAGAGAGAG:0  |
| chr28                         | 10865863 | 2 | 34 | C:0.852941         | A:0.147059   |
| chr28                         | 10865864 | 2 | 34 | C:0.852941         | G:0.147059   |
| chr28                         | 10866132 | 2 | 38 | TAGA:0.894737      | T:0.105263   |
| chr28                         | 10866499 | 2 | 38 | G:0.947368         | A:0.0526316  |
| chr28                         | 10866730 | 2 | 40 | A:0.925            | G:0.075      |
| chr28                         | 10866868 | 2 | 40 | C:0.95             | A:0.05       |
| chr28                         | 10866882 | 3 | 38 | T:0.131579         | TTTTTTTTTC:  |
| 0.763158 TTTTTTTTTTC:0.105263 |          |   |    |                    |              |
| chr28                         | 10866963 | 2 | 40 | T:0.825            | C:0.175      |
| chr28                         | 10867622 | 2 | 38 | T:0.157895         | A:0.842105   |
| chr28                         | 10867736 | 2 | 32 | G:1                | C:0          |
| chr28                         | 10868147 | 2 | 28 | C:0.321429         | T:0.678571   |
| chr28                         | 10868162 | 2 | 38 | C:0.973684         | T:0.0263158  |
| chr28                         | 10868166 | 3 | 40 | CCTCT:0.3          | C:0.025      |
| CCTCTCTCTCTCTCTCTCT:0.675     |          |   |    |                    |              |
| chr28                         | 10868195 | 2 | 36 | C:0.194444         | T:0.805556   |
| chr28                         | 10868318 | 2 | 36 | T:0.194444         | A:0.805556   |

|       |            |    |                   |               |
|-------|------------|----|-------------------|---------------|
| chr28 | 10868481 2 | 32 | A:0.09375         | T:0.90625     |
| chr28 | 10868483 2 | 32 | T:0.1875 C:0.8125 |               |
| chr28 | 10868521 2 | 36 | CTCTCTCTCTT:0.75  | C:0.25        |
| chr28 | 10868576 2 | 36 | A:0.166667        | AAAT:0.833333 |
| chr28 | 10868578 2 | 36 | A:0.888889        | AT:0.111111   |
| chr28 | 10868758 2 | 32 | C:1 T:0           |               |
| chr28 | 10868815 2 | 36 | G:0.166667        | C:0.833333    |
| chr28 | 10868964 2 | 38 | T:0.210526        | A:0.789474    |
| chr28 | 10869130 2 | 36 | C:0 T:1           |               |
| chr28 | 10869158 2 | 34 | T:0.852941        | G:0.147059    |
| chr28 | 10869284 2 | 40 | A:0.175 G:0.825   |               |
| chr28 | 10869285 2 | 40 | A:0.175 C:0.825   |               |
| chr28 | 10869310 2 | 40 | T:0.175 G:0.825   |               |
| chr28 | 10869556 2 | 34 | C:0.0882353       | CTTT:0.911765 |
| chr28 | 10869590 2 | 38 | GAGAT:0.947368    | G:0.0526316   |
| chr28 | 10869596 2 | 38 | GAGAC:1 G:0       |               |
| chr28 | 10869650 2 | 40 | A:0.1 T:0.9       |               |
| chr28 | 10869654 2 | 40 | C:0.275 T:0.725   |               |
| chr28 | 10869696 2 | 36 | C:0.25 T:0.75     |               |
| chr28 | 10869731 2 | 38 | C:0.131579        | A:0.868421    |
| chr28 | 10869775 2 | 36 | T:0.111111        | A:0.888889    |
| chr28 | 10869897 2 | 36 | C:0.0833333       | T:0.916667    |
| chr28 | 10870079 2 | 40 | C:0.15 T:0.85     |               |
| chr28 | 10870392 2 | 38 | A:0.184211        | G:0.815789    |
| chr28 | 10870618 2 | 36 | T:0.194444        | G:0.805556    |
| chr28 | 10870656 2 | 36 | G:0.111111        | A:0.888889    |
| chr28 | 10870776 2 | 32 | G:0.25 GT:0.75    |               |
| chr28 | 10870878 2 | 36 | T:0.861111        | C:0.138889    |
| chr28 | 10870990 2 | 32 | A:0 G:1           |               |
| chr28 | 10871005 2 | 34 | C:0.882353        | A:0.117647    |
| chr28 | 10871006 2 | 34 | C:0.941176        | T:0.0588235   |
| chr28 | 10871062 2 | 32 | G:0.125 T:0.875   |               |
| chr28 | 10871087 2 | 38 | C:0.157895        | T:0.842105    |
| chr28 | 10871128 2 | 38 | T:0.131579        | C:0.868421    |
| chr28 | 10871129 2 | 38 | G:0.131579        | A:0.868421    |
| chr28 | 10871149 2 | 38 | C:0.868421        | T:0.131579    |
| chr28 | 10871212 2 | 38 | G:0.868421        | A:0.131579    |
| chr28 | 10871264 2 | 32 | C:0.15625         | A:0.84375     |
| chr28 | 10871302 2 | 36 | C:0.111111        | T:0.888889    |
| chr28 | 10871347 2 | 34 | T:0.911765        | C:0.0882353   |
| chr28 | 10871425 2 | 34 | C:0.147059        | T:0.852941    |
| chr28 | 10871534 2 | 36 | A:0 G:1           |               |
| chr28 | 10871606 2 | 40 | GC:0.9 G:0.1      |               |
| chr28 | 10871740 2 | 38 | A:1 G:0           |               |
| chr28 | 10871886 2 | 38 | G:0.131579        | A:0.868421    |
| chr28 | 10871887 2 | 38 | T:0.131579        | C:0.868421    |
| chr28 | 10872568 2 | 38 | T:0.0526316       | A:0.947368    |
| chr28 | 10872820 2 | 38 | AG:0.210526       | A:0.789474    |
| chr28 | 10872826 2 | 38 | T:0.868421        | TA:0.131579   |
| chr28 | 10872858 2 | 40 | A:0.175 G:0.825   |               |
| chr28 | 10872929 2 | 40 | T:0.875 G:0.125   |               |
| chr28 | 10873807 2 | 38 | T:0.184211        | C:0.815789    |
| chr28 | 10874308 2 | 38 | G:0 A:1           |               |
| chr28 | 10874488 2 | 36 | C:0.805556        | T:0.194444    |

|              |          |   |    |               |                    |
|--------------|----------|---|----|---------------|--------------------|
| chr28        | 10874513 | 2 | 38 | C:0.842105    | T:0.157895         |
| chr28        | 10874561 | 2 | 34 | A:0.941176    | C:0.0588235        |
| chr28        | 10874875 | 2 | 40 | T:0.925       | C:0.075            |
| chr28        | 10874877 | 2 | 40 | G:1           | A:0                |
| chr28        | 10875700 | 2 | 32 | C:0.84375     | T:0.15625          |
| chr28        | 10876582 | 2 | 36 | C:0.777778    | G:0.222222         |
| chr28        | 10876610 | 2 | 38 | G:0.710526    | T:0.289474         |
| chr28        | 10876739 | 2 | 36 | G:0.861111    | A:0.138889         |
| chr28        | 10877140 | 2 | 36 | G:0.138889    | A:0.861111         |
| chr28        | 10877370 | 2 | 40 | T:0.125       | G:0.875            |
| chr28        | 10877580 | 2 | 32 | TCA:0.96875   | T:0.03125          |
| chr28        | 10877612 | 3 | 32 | T:0.09375     | TA:0.46875         |
| TAAA:0.4375  |          |   |    |               |                    |
| chr28        | 10877971 | 2 | 38 | G:0.947368    | T:0.0526316        |
| chr28        | 10877998 | 2 | 38 | C:0.868421    | T:0.131579         |
| chr28        | 10878014 | 2 | 38 | C:0.868421    | A:0.131579         |
| chr28        | 10878049 | 2 | 36 | A:0.833333    | T:0.166667         |
| chr28        | 10878119 | 2 | 36 | A:0           | G:1                |
| chr28        | 10878826 | 2 | 36 | C:1           | T:0                |
| chr28        | 10879239 | 2 | 40 | T:0.175       | A:0.825            |
| chr28        | 10879496 | 2 | 40 | T:0.9         | C:0.1              |
| chr28        | 10879749 | 2 | 38 | G:1           | C:0                |
| chr28        | 10879835 | 2 | 40 | C:0           | G:1                |
| chr28        | 10879837 | 2 | 38 | AT:0.763158   | A:0.236842         |
| chr28        | 10879933 | 2 | 36 | T:0.138889    | C:0.861111         |
| chr28        | 10880214 | 2 | 34 | C:0.176471    | T:0.823529         |
| chr28        | 10880333 | 2 | 36 | G:0.166667    | GATTAA:0.833333    |
| chr28        | 10880468 | 2 | 34 | C:0.911765    | T:0.0882353        |
| chr28        | 10880501 | 2 | 32 | G:0           | A:1                |
| chr28        | 10880523 | 2 | 34 | C:0.823529    | T:0.176471         |
| chr28        | 10880620 | 2 | 34 | C:0.323529    | G:0.676471         |
| chr28        | 10880621 | 2 | 38 | T:0.105263    | TGTGA:0.894737     |
| chr28        | 10880633 | 2 | 38 | T:0.921053    | TA:0.0789474       |
| chr28        | 10880637 | 2 | 36 | A:1           | AAAAAAAAT:0        |
| chr28        | 10880638 | 3 | 36 | A:0.166667    | AAAAAAAAT:0.833333 |
| AAAAAAAATT:0 |          |   |    |               |                    |
| chr28        | 10880657 | 2 | 38 | A:0.921053    | T:0.0789474        |
| chr28        | 10880785 | 2 | 38 | T:0.0789474   | A:0.921053         |
| chr28        | 10880789 | 2 | 38 | C:1           | A:0                |
| chr28        | 10881307 | 2 | 36 | A:0.166667    | C:0.833333         |
| chr28        | 10881437 | 2 | 38 | A:0.894737    | G:0.105263         |
| chr28        | 10881444 | 2 | 36 | C:0.111111    | T:0.888889         |
| chr28        | 10881588 | 3 | 32 | CTTTT:0.65625 | C:0.21875          |
| CTT:0.125    |          |   |    |               |                    |
| chr28        | 10881646 | 2 | 36 | C:1           | T:0                |
| chr28        | 10881792 | 2 | 32 | T:0.84375     | G:0.15625          |
| chr28        | 10881808 | 2 | 32 | G:0.75        | A:0.25             |
| chr28        | 10881849 | 2 | 32 | A:0.78125     | G:0.21875          |
| chr28        | 10882110 | 2 | 30 | C:0.766667    | CCTCT:0.233333     |
| chr28        | 10882163 | 2 | 38 | C:0.815789    | T:0.184211         |
| chr28        | 10882434 | 2 | 40 | G:0.2         | C:0.8              |
| chr28        | 10882688 | 2 | 36 | TG:0.194444   | T:0.805556         |
| chr28        | 10882760 | 2 | 36 | C:0.861111    | A:0.138889         |
| chr28        | 10882808 | 2 | 36 | A:0.888889    | G:0.111111         |

|             |          |               |    |                          |                  |
|-------------|----------|---------------|----|--------------------------|------------------|
| chr28       | 10882976 | 2             | 38 | C:0.210526               | G:0.789474       |
| chr28       | 10883014 | 2             | 34 | C:0.823529               | T:0.176471       |
| chr28       | 10883028 | 2             | 36 | A:0                      | G:1              |
| chr28       | 10883125 | 2             | 32 | T:0.875                  | C:0.125          |
| chr28       | 10883240 | 2             | 34 | TA:0.794118              | T:0.205882       |
| chr28       | 10883368 | 2             | 34 | T:0.176471               | G:0.823529       |
| chr28       | 10883680 | 2             | 40 | T:0.15                   | C:0.85           |
| chr28       | 10884142 | 2             | 36 | A:0.0277778              | AT:0.972222      |
| chr28       | 10884231 | 2             | 38 | A:0                      | T:1              |
| chr28       | 10884436 | 2             | 38 | A:1                      | G:0              |
| chr28       | 10884509 | 2             | 36 | G:1                      | C:0              |
| chr28       | 10884565 | 2             | 38 | T:0.894737               | G:0.105263       |
| chr28       | 10884599 | 4             | 36 | TAAA:0.111111            | T:0.277778       |
| TA:0.555556 |          | TAA:0.0555556 |    |                          |                  |
| chr28       | 10885261 | 2             | 36 | T:0                      | C:1              |
| chr28       | 10885283 | 2             | 34 | G:0                      | A:1              |
| chr28       | 10885292 | 2             | 36 | G:0.888889               | A:0.111111       |
| chr28       | 10885993 | 2             | 36 | T:0.416667               | A:0.583333       |
| chr28       | 10886462 | 2             | 40 | TAA:0.125                | T:0.875          |
| chr28       | 10886477 | 2             | 40 | C:0.725                  | A:0.275          |
| chr28       | 10886537 | 2             | 36 | G:1                      | A:0              |
| chr28       | 10887200 | 2             | 40 | G:0.675                  | A:0.325          |
| chr28       | 10887440 | 2             | 38 | AT:0.394737              | A:0.605263       |
| chr28       | 10887451 | 2             | 38 | TG:1                     | T:0              |
| chr28       | 10887501 | 2             | 38 | C:1                      | CT:0             |
| chr28       | 10887503 | 2             | 38 | T:0.394737               | TTA:0.605263     |
| chr28       | 10887504 | 2             | 38 | TTTTTTTATTTTTTA:0.947368 | T:0.0526316      |
| chr28       | 10887511 | 2             | 38 | A:0.421053               | AT:0.578947      |
| chr28       | 10887512 | 2             | 38 | TTTTTTAA:1               | T:0              |
| chr28       | 10887519 | 2             | 38 | A:0.421053               | T:0.578947       |
| chr28       | 10887526 | 2             | 38 | T:0.947368               | TA:0.0526316     |
| chr28       | 10887540 | 2             | 38 | G:0.763158               | GT:0.236842      |
| chr28       | 10887541 | 3             | 38 | C:0.131579               | A:0.605263       |
| CA:0.263158 |          |               |    |                          |                  |
| chr28       | 10887552 | 2             | 38 | G:0.473684               | GAGAGAGGC:       |
| 0.526316    |          |               |    |                          |                  |
| chr28       | 10887723 | 2             | 32 | C:1                      | A:0              |
| chr28       | 10887724 | 2             | 32 | C:0.28125                | G:0.71875        |
| chr28       | 10887906 | 2             | 36 | T:0.25                   | A:0.75           |
| chr28       | 10887991 | 2             | 34 | G:0.911765               | A:0.0882353      |
| chr28       | 10888001 | 2             | 34 | G:1                      | A:0              |
| chr28       | 10888546 | 2             | 36 | A:0.305556               | G:0.694444       |
| chr28       | 10888643 | 2             | 38 | T:0.473684               | C:0.526316       |
| chr28       | 10888752 | 2             | 40 | C:0.3                    | T:0.7            |
| chr28       | 10888856 | 2             | 34 | A:0.470588               | G:0.529412       |
| chr28       | 10888873 | 2             | 36 | A:0.222222               | T:0.777778       |
| chr28       | 10888979 | 2             | 38 | A:0.394737               | G:0.605263       |
| chr28       | 10889159 | 2             | 40 | A:0.5                    | G:0.5            |
| chr28       | 10889208 | 2             | 36 | G:0.916667               | GTTATT:0.0833333 |
| chr28       | 10889388 | 2             | 28 | G:1                      | C:0              |
| chr28       | 10889581 | 2             | 36 | TTTTA:0.75               | T:0.25           |
| chr28       | 10889598 | 2             | 38 | A:0.763158               | G:0.236842       |
| chr28       | 10889965 | 2             | 32 | A:0.28125                | AT:0.71875       |

|                    |            |    |                    |              |
|--------------------|------------|----|--------------------|--------------|
| chr28              | 10890035 2 | 32 | C:0.71875          | T:0.28125    |
| chr28              | 10890255 2 | 38 | G:0.578947         | A:0.421053   |
| chr28              | 10890290 2 | 36 | A:0.472222         | G:0.527778   |
| chr28              | 10890352 2 | 34 | G:0.882353         | C:0.117647   |
| chr28              | 10890492 2 | 36 | G:0.583333         | A:0.416667   |
| chr28              | 10890598 3 | 22 | T:0.5 TG:0.5 TGG:0 |              |
| chr28              | 10890840 2 | 6  | TGGCGGCGGCGGC:0.5  | T:0.5        |
| chr28              | 10891262 2 | 30 | C:0.0666667        | CA:0.933333  |
| chr28              | 10891267 2 | 30 | G:0.633333         | C:0.366667   |
| chr28              | 10891415 2 | 34 | G:0.647059         | A:0.352941   |
| chr28              | 10891631 2 | 38 | C:0.131579         | G:0.868421   |
| chr28              | 10892104 2 | 36 | G:1 C:0            |              |
| chr28              | 10892388 2 | 40 | A:1 C:0            |              |
| chr28              | 10892613 3 | 36 | C:0.611111         | CT:0.222222  |
| CTTT:0.166667      |            |    |                    |              |
| chr28              | 10893265 2 | 36 | T:1 A:0            |              |
| chr28              | 10893391 2 | 38 | CT:1 C:0           |              |
| chr28              | 10893402 2 | 38 | C:0.631579         | T:0.368421   |
| chr28              | 10893436 2 | 36 | G:1 A:0            |              |
| chr28              | 10894068 2 | 38 | C:0.578947         | T:0.421053   |
| chr28              | 10894272 2 | 36 | A:0.944444         | AT:0.0555556 |
| chr28              | 10894438 2 | 38 | A:1 T:0            |              |
| chr28              | 10894539 2 | 36 | C:0.472222         | CAG:0.527778 |
| chr28              | 10894647 2 | 36 | C:0.416667         | A:0.583333   |
| chr28              | 10894755 2 | 36 | G:0.916667         | GT:0.0833333 |
| chr28              | 10894864 2 | 34 | A:1 T:0            |              |
| chr28              | 10894994 2 | 32 | C:0.8125 T:0.1875  |              |
| chr28              | 10895137 3 | 38 | TATTG:0.736842     | T:0          |
| TATTGATTG:0.263158 |            |    |                    |              |
| chr28              | 10895171 2 | 38 | GACACAC:0.289474   | G:0.710526   |
| chr28              | 10895298 2 | 38 | G:0.973684         | C:0.0263158  |
| chr28              | 10895383 2 | 38 | GTTTGTT:1          | G:0          |
| chr28              | 10895443 2 | 38 | G:1 A:0            |              |
| chr28              | 10895844 2 | 38 | G:1 A:0            |              |
| chr28              | 10896146 2 | 38 | T:0.526316         | A:0.473684   |
| chr28              | 10896255 2 | 38 | G:0.947368         | C:0.0526316  |
| chr28              | 10896385 2 | 32 | TA:0.71875         | T:0.28125    |
| chr28              | 10897336 2 | 38 | G:0.0263158        | GC:0.973684  |
| chr28              | 10897637 2 | 38 | A:0 C:1            |              |
| chr28              | 10897638 2 | 38 | A:0 T:1            |              |
| chr28              | 10897678 2 | 38 | A:0 T:1            |              |
| chr28              | 10897680 2 | 38 | G:0 A:1            |              |
| chr28              | 10898145 2 | 40 | T:0.05 G:0.95      |              |
| chr28              | 10899759 2 | 40 | G:1 A:0            |              |
| chr28              | 10900002 2 | 38 | A:0.447368         | G:0.552632   |
| chr28              | 10901102 2 | 34 | A:0.882353         | AT:0.117647  |
| chr28              | 10901787 2 | 36 | AGGATTTTCACTGT:1   | A:0          |
| chr28              | 10902365 4 | 32 | T:0.28125          | TTC:0.71875  |
| TTCTC:0 TTCTCTC:0  |            |    |                    |              |
| chr28              | 10902471 3 | 36 | CT:0.75 C:0.194444 | CTT:         |
| 0.0555556          |            |    |                    |              |
| chr28              | 10902624 2 | 38 | G:1 A:0            |              |
| chr28              | 10902631 2 | 38 | GGA:0.921053       | G:0.0789474  |
| chr28              | 10903125 2 | 36 | T:0.916667         | C:0.0833333  |

|                                                |          |   |    |                    |                 |                 |
|------------------------------------------------|----------|---|----|--------------------|-----------------|-----------------|
| chr28                                          | 10905054 | 2 | 40 | A:1                | G:0             |                 |
| chr28                                          | 10905636 | 2 | 30 | C:0.766667         |                 | CT:0.233333     |
| chr28                                          | 10905757 | 2 | 38 | C:0.447368         |                 | CT:0.552632     |
| chr28                                          | 10906371 | 2 | 38 | C:1                | T:0             |                 |
| chr28                                          | 10907929 | 3 | 34 | C:0.617647         |                 | CT:0.382353     |
| CTT:0                                          |          |   |    |                    |                 |                 |
| chr28                                          | 10908479 | 2 | 34 | G:0.411765         |                 | GT:0.588235     |
| chr28                                          | 10909005 | 2 | 30 | G:0.5              | A:0.5           |                 |
| chr28                                          | 10909089 | 2 | 38 | C:0.947368         |                 | T:0.0526316     |
| chr28                                          | 10909106 | 2 | 40 | T:0.425            | TAAA:0.575      |                 |
| chr28                                          | 10909107 | 4 | 40 | T:0.225            | A:0.575         | TAAA:0.05       |
| TTAA:0.15                                      |          |   |    |                    |                 |                 |
| chr28                                          | 10909525 | 2 | 38 | C:1                | CAGAG:0         |                 |
| chr28                                          | 10909952 | 6 | 38 | T:0.131579         |                 | TATAG:0.0263158 |
| TATAGATAG:0.394737                             |          |   |    |                    |                 |                 |
| TATAGATAGATAG:0.447368                         |          |   |    |                    |                 |                 |
| TATAGATAGATAGATAG:0                            |          |   |    |                    |                 |                 |
| chr28                                          | 10909963 | 2 | 38 | A:1                | AGATAGATAGATG:0 |                 |
| chr28                                          | 10911677 | 2 | 38 | CT:1               | C:0             |                 |
| chr28                                          | 10912047 | 2 | 36 | T:0.888889         |                 | A:0.111111      |
| chr28                                          | 10912950 | 2 | 36 | A:0.972222         |                 | G:0.0277778     |
| chr28                                          | 10913896 | 2 | 38 | TG:1               | T:0             |                 |
| chr28                                          | 10914811 | 2 | 36 | CTA:0.416667       |                 | C:0.583333      |
| chr28                                          | 10914827 | 5 | 38 | CAAATAAAT:0.131579 |                 | C:              |
| 0.315789 CAAAT:0.236842 CAAATAAATAAAT:0.105263 |          |   |    |                    |                 |                 |
| CAAATAAATAAATAAAT:0.210526                     |          |   |    |                    |                 |                 |
| chr28                                          | 10915294 | 2 | 40 | C:1                | T:0             |                 |
| chr28                                          | 10915752 | 2 | 38 | T:0.657895         |                 | A:0.342105      |
| chr28                                          | 10915858 | 2 | 30 | C:1                | T:0             |                 |
| chr28                                          | 10916032 | 3 | 32 | C:0.46875          |                 | CT:0.46875      |
| CTTT:0.0625                                    |          |   |    |                    |                 |                 |
| chr28                                          | 10916305 | 2 | 38 | T:0.473684         |                 | C:0.526316      |
| chr28                                          | 10916365 | 2 | 38 | C:0.473684         |                 | T:0.526316      |
| chr28                                          | 10917379 | 2 | 28 | C:0.178571         |                 | CT:0.821429     |
| chr28                                          | 10917399 | 2 | 30 | A:0.633333         |                 | C:0.366667      |
| chr28                                          | 10918597 | 2 | 34 | T:1                | C:0             |                 |
| chr28                                          | 10918758 | 2 | 40 | CTAAG:1            | C:0             |                 |
| chr28                                          | 10918832 | 2 | 38 | C:0.973684         |                 | T:0.0263158     |
| chr28                                          | 10920076 | 2 | 34 | C:1                | G:0             |                 |
| chr28                                          | 10924839 | 2 | 36 | G:0.611111         |                 | A:0.388889      |
| chr28                                          | 10924859 | 2 | 36 | T:1                | A:0             |                 |
| chr28                                          | 10925321 | 2 | 26 | GC:0.846154        |                 | G:0.153846      |
| chr28                                          | 10925332 | 2 | 28 | CCA:1              | C:0             |                 |
| chr28                                          | 10925333 | 2 | 22 | CA:0.5             | C:0.5           |                 |
| chr28                                          | 10925638 | 2 | 38 | C:0.736842         |                 | T:0.263158      |
| chr28                                          | 10925699 | 2 | 36 | TC:1               | T:0             |                 |
| chr28                                          | 10926072 | 2 | 30 | T:0.466667         |                 | C:0.533333      |
| chr28                                          | 10926654 | 2 | 38 | A:0.552632         |                 | G:0.447368      |
| chr28                                          | 10926698 | 2 | 32 | TA:0.84375         |                 | T:0.15625       |
| chr28                                          | 10927281 | 2 | 34 | C:0.382353         |                 | T:0.617647      |
| chr28                                          | 10927702 | 2 | 38 | C:1                | T:0             |                 |
| chr28                                          | 10927966 | 2 | 32 | T:0.40625          |                 | C:0.59375       |
| chr28                                          | 10928296 | 4 | 38 | T:0.210526         |                 | TA:0.368421     |
| TAA:0.289474 TAAA:0.131579                     |          |   |    |                    |                 |                 |
| chr28                                          | 10928307 | 2 | 38 | A:1                | AAC:0           |                 |

|                               |          |   |    |                    |                 |
|-------------------------------|----------|---|----|--------------------|-----------------|
| chr28                         | 10929538 | 2 | 38 | T:0.552632         | C:0.447368      |
| chr28                         | 10929724 | 2 | 38 | G:0.921053         | A:0.0789474     |
| chr28                         | 10930563 | 2 | 32 | G:1                | A:0             |
| chr28                         | 10930732 | 2 | 16 | G:0.3125           | C:0.6875        |
| chr28                         | 10931128 | 2 | 32 | CG:0               | C:1             |
| chr28                         | 10931223 | 2 | 28 | T:0.321429         | C:0.678571      |
| chr28                         | 10931289 | 2 | 28 | A:0.785714         | G:0.214286      |
| chr28                         | 10931588 | 2 | 36 | G:0.333333         | C:0.666667      |
| chr28                         | 10931590 | 2 | 36 | G:0.5              | C:0.5           |
| chr28                         | 10931625 | 2 | 40 | T:0.325            | TA:0.675        |
| chr28                         | 10931626 | 2 | 40 | T:0.325            | A:0.675         |
| chr28                         | 10931741 | 2 | 40 | A:0.65             | C:0.35          |
| chr28                         | 10931801 | 2 | 32 | G:1                | C:0             |
| chr28                         | 10931842 | 2 | 34 | C:0.352941         | CAG:0.647059    |
| chr28                         | 10932002 | 3 | 40 | TAAAAAACATA:0.325  | T:0.1           |
| TAAAAAACATA:0.575             |          |   |    |                    |                 |
| chr28                         | 10932018 | 2 | 40 | TA:0.525           | T:0.475         |
| chr28                         | 10932229 | 3 | 30 | CTGTG:0.333333     | C:0.433333      |
| CTG:0.233333                  |          |   |    |                    |                 |
| chr28                         | 10932540 | 2 | 36 | C:0.416667         | A:0.583333      |
| chr28                         | 10932838 | 2 | 38 | C:1                | T:0             |
| chr28                         | 10933289 | 2 | 36 | A:0.666667         | G:0.333333      |
| chr28                         | 10933798 | 2 | 38 | C:0.973684         | CA:0.0263158    |
| chr28                         | 10933842 | 2 | 40 | T:1                | A:0             |
| chr28                         | 10934253 | 2 | 38 | T:0.447368         | C:0.552632      |
| chr28                         | 10934424 | 2 | 38 | T:0.315789         | C:0.684211      |
| chr28                         | 10934487 | 2 | 34 | A:0.352941         | T:0.647059      |
| chr28                         | 10934765 | 2 | 38 | T:0.421053         | C:0.578947      |
| chr28                         | 10934913 | 2 | 34 | A:1                | G:0             |
| chr28                         | 10934991 | 2 | 34 | TA:0.382353        | T:0.617647      |
| chr28                         | 10934992 | 2 | 34 | A:1                | T:0             |
| chr28                         | 10935306 | 2 | 38 | T:0.631579         | A:0.368421      |
| chr28                         | 10935724 | 2 | 36 | T:0.75             | C:0.25          |
| chr28                         | 10935759 | 3 | 36 | TA:0.555556        | T:0.444444      |
| TAA:0                         |          |   |    |                    |                 |
| chr28                         | 10935844 | 2 | 36 | C:0.722222         | T:0.277778      |
| chr28                         | 10936650 | 2 | 40 | C:0.625            | T:0.375         |
| chr28                         | 10936790 | 2 | 34 | A:0.382353         | ACT:0.617647    |
| chr28                         | 10936918 | 2 | 36 | G:1                | A:0             |
| chr28                         | 10937108 | 2 | 32 | C:0.3125           | T:0.6875        |
| chr28                         | 10937631 | 2 | 40 | T:0.45             | C:0.55          |
| chr28                         | 10937655 | 2 | 40 | G:0.7              | A:0.3           |
| chr28                         | 10937749 | 2 | 34 | C:1                | T:0             |
| chr28                         | 10937773 | 2 | 34 | C:1                | CATTT:0         |
| chr28                         | 10937780 | 3 | 36 | T:0.388889         | TTTTTTTAA:      |
| 0.555556 TTTTTTTTAA:0.0555556 |          |   |    |                    |                 |
| chr28                         | 10937947 | 2 | 36 | G:0.444444         | A:0.555556      |
| chr28                         | 10938016 | 2 | 38 | T:0.763158         | C:0.236842      |
| chr28                         | 10938156 | 2 | 30 | G:1                | A:0             |
| chr28                         | 10938218 | 2 | 36 | CTCTTCCCT:0.75     | C:0.25          |
| chr28                         | 10938220 | 2 | 36 | CTCTTCCCT:0.805556 | C:              |
| 0.194444                      |          |   |    |                    |                 |
| chr28                         | 10938222 | 3 | 38 | CTTCCCT:0.842105   | CTCCCT:0.157895 |
| C:0                           |          |   |    |                    |                 |





|       |            |    |                   |                         |                 |
|-------|------------|----|-------------------|-------------------------|-----------------|
| chr28 | 10950059 2 | 34 | C:1               | T:0                     |                 |
| chr28 | 10950206 2 | 34 | A:0.911765        |                         | C:0.0882353     |
| chr28 | 10950222 2 | 36 | G:0.527778        |                         | A:0.472222      |
| chr28 | 10950323 2 | 36 | C:1               | G:0                     |                 |
| chr28 | 10950328 2 | 36 | C:0.361111        |                         | T:0.638889      |
| chr28 | 10950411 2 | 38 | C:0.342105        |                         | G:0.657895      |
| chr28 | 10950548 2 | 34 | C:0.441176        |                         | T:0.558824      |
| chr28 | 10950605 2 | 36 | C:0.972222        |                         | G:0.0277778     |
| chr28 | 10951080 2 | 38 | C:0.368421        |                         | A:0.631579      |
| chr28 | 10951082 2 | 38 | G:0.368421        |                         | A:0.631579      |
| chr28 | 10951248 2 | 40 | A:1               | G:0                     |                 |
| chr28 | 10951424 2 | 38 | ACCCTGCATGGTTTAC: | 0.868421                | A:              |
|       | 0.131579   |    |                   |                         |                 |
| chr28 | 10951510 2 | 34 | C:0.352941        |                         | G:0.647059      |
| chr28 | 10952305 2 | 38 | A:1               | C:0                     |                 |
| chr28 | 10952502 3 | 36 | A:0.25            | C:0.0555556             | G:              |
|       | 0.694444   |    |                   |                         |                 |
| chr28 | 10952514 2 | 36 | A:0.944444        |                         | G:0.0555556     |
| chr28 | 10952562 2 | 32 | C:0.96875         |                         | G:0.03125       |
| chr28 | 10952625 2 | 38 | G:0.973684        |                         | C:0.0263158     |
| chr28 | 10952637 2 | 38 | GTA:0.289474      |                         | G:0.710526      |
| chr28 | 10952639 2 | 38 | A:0.973684        |                         | G:0.0263158     |
| chr28 | 10952815 2 | 34 | T:0.352941        |                         | C:0.647059      |
| chr28 | 10952979 2 | 36 | A:0.472222        |                         | G:0.527778      |
| chr28 | 10953058 2 | 34 | A:0.941176        |                         | T:0.0588235     |
| chr28 | 10953067 2 | 34 | T:0.794118        |                         | A:0.205882      |
| chr28 | 10953068 2 | 34 | T:0.352941        |                         | A:0.647059      |
| chr28 | 10953078 2 | 32 | AAAAAT:1          | A:0                     |                 |
| chr28 | 10953092 2 | 34 | A:0.352941        |                         | G:0.647059      |
| chr28 | 10953185 2 | 20 | C:0.45            | CA:0.55                 |                 |
| chr28 | 10953242 2 | 22 | T:0.227273        |                         | C:0.772727      |
| chr28 | 10953533 2 | 16 | G:1               | T:0                     |                 |
| chr28 | 10953616 2 | 26 | C:0.538462        |                         | A:0.461538      |
| chr28 | 10953773 2 | 40 | G:0.975           | GAGTGTGGA:              | 0.025           |
| chr28 | 10953774 2 | 40 | C:0.975           | CCACCCATGGCATAGCCAGCAT: |                 |
|       | 0.025      |    |                   |                         |                 |
| chr28 | 10954058 2 | 32 | C:0.25            | T:0.75                  |                 |
| chr28 | 10954059 2 | 32 | A:0.25            | G:0.75                  |                 |
| chr28 | 10954098 2 | 38 | C:0.684211        |                         | CAGGGA:0.315789 |
| chr28 | 10954143 2 | 38 | T:0.421053        |                         | A:0.578947      |
| chr28 | 10954226 2 | 36 | T:0.388889        |                         | TTTTA:0.611111  |
| chr28 | 10954538 2 | 36 | G:0.0833333       |                         | C:0.916667      |
| chr28 | 10954668 2 | 34 | C:0.735294        |                         | T:0.264706      |
| chr28 | 10954711 2 | 34 | A:0.911765        |                         | AATT:0.0882353  |
| chr28 | 10954733 2 | 36 | C:1               | T:0                     |                 |
| chr28 | 10954773 2 | 38 | AGGCG:0.0789474   |                         | A:0.921053      |
| chr28 | 10955057 2 | 38 | T:0.947368        |                         | C:0.0526316     |
| chr28 | 10955111 2 | 34 | CACG:0.676471     |                         | C:0.323529      |
| chr28 | 10955169 2 | 34 | A:0.294118        |                         | G:0.705882      |
| chr28 | 10955289 2 | 38 | G:0.210526        |                         | C:0.789474      |
| chr28 | 10955498 2 | 38 | GAC:0.763158      |                         | G:0.236842      |
| chr28 | 10955581 2 | 36 | G:0.777778        |                         | A:0.222222      |
| chr28 | 10955860 2 | 36 | G:0.861111        |                         | T:0.138889      |
| chr28 | 10955862 2 | 36 | A:0.861111        |                         | G:0.138889      |

|                                                  |            |    |                                   |              |
|--------------------------------------------------|------------|----|-----------------------------------|--------------|
| chr28                                            | 10956211 2 | 36 | A:0.75                            | C:0.25       |
| chr28                                            | 10956220 2 | 38 | C:0.657895                        | T:0.342105   |
| chr28                                            | 10956406 2 | 40 | AGTGATTTTTTTTACCTTG:0.625 A:0.375 |              |
| chr28                                            | 10956444 2 | 40 | T:0.65                            | A:0.35       |
| chr28                                            | 10956472 3 | 34 | C:0.617647                        | CAG:0.147059 |
| CAGAGAG:0.235294                                 |            |    |                                   |              |
| chr28                                            | 10956634 2 | 32 | AT:0.75                           | A:0.25       |
| chr28                                            | 10956653 2 | 32 | A:0.625                           | T:0.375      |
| chr28                                            | 10956654 2 | 32 | A:0.625                           | T:0.375      |
| chr28                                            | 10956764 2 | 38 | A:0.315789                        | AT:0.684211  |
| chr28                                            | 10956893 2 | 34 | G:0.970588                        | A:0.0294118  |
| chr28                                            | 10956988 2 | 38 | A:0.368421                        | G:0.631579   |
| chr28                                            | 10957438 2 | 34 | G:1                               | A:0          |
| chr28                                            | 10957724 2 | 34 | T:0.676471                        | G:0.323529   |
| chr28                                            | 10957781 2 | 30 | C:0.8                             | CT:0.2       |
| chr28                                            | 10957792 2 | 30 | G:0.5                             | T:0.5        |
| chr28                                            | 10957793 2 | 30 | GAA:0.8                           | G:0.2        |
| chr28                                            | 10957794 2 | 30 | A:0.666667                        | G:0.333333   |
| chr28                                            | 10957804 2 | 30 | A:0.833333                        | T:0.166667   |
| chr28                                            | 10958111 2 | 38 | G:0.315789                        | A:0.684211   |
| chr28                                            | 10958233 2 | 34 | AT:0.911765                       | A:0.0882353  |
| chr28                                            | 10958332 2 | 36 | T:0.638889                        | G:0.361111   |
| chr28                                            | 10958419 2 | 38 | C:0.657895                        | A:0.342105   |
| chr28                                            | 10958530 3 | 36 | CT:0.666667                       | C:0.0277778  |
| CTT:0.305556                                     |            |    |                                   |              |
| chr28                                            | 10958549 3 | 36 | CTT:0.444444                      | C:0.0277778  |
| CT:0.527778                                      |            |    |                                   |              |
| chr28                                            | 10958909 2 | 38 | GGAC:0.894737                     | G:0.105263   |
| chr28                                            | 10958913 2 | 38 | TCA:0.894737                      | T:0.105263   |
| chr28                                            | 10959445 2 | 40 | C:0.375                           | T:0.625      |
| chr28                                            | 10959761 2 | 32 | T:1                               | A:0          |
| chr28                                            | 10959870 2 | 40 | G:1                               | C:0          |
| chr28                                            | 10959990 2 | 30 | G:0.666667                        | GAC:0.333333 |
| chr28                                            | 10960491 2 | 34 | TA:0.323529                       | T:0.676471   |
| chr28                                            | 10960645 2 | 38 | TCTA:1                            | T:0          |
| chr28                                            | 10960661 2 | 38 | C:0.657895                        | T:0.342105   |
| chr28                                            | 10960664 2 | 38 | T:0.657895                        | C:0.342105   |
| chr28                                            | 10960683 2 | 22 | CT:0.545455                       | C:0.454545   |
| chr28                                            | 10960719 3 | 34 | C:0.588235                        | CAG:0.323529 |
| CAGAGAG:0.0882353                                |            |    |                                   |              |
| chr28                                            | 10960739 2 | 28 | GGC:1                             | G:0          |
| chr28                                            | 10961047 2 | 38 | T:0.973684                        | C:0.0263158  |
| chr28                                            | 10961328 2 | 40 | T:0.75                            |              |
| TTTTTTTTGTTTGTTTTTTTTTTTTACATCAATAAAATCTTAA:0.25 |            |    |                                   |              |
| chr28                                            | 10961337 2 | 36 | ACC:0.472222                      | A:0.527778   |
| chr28                                            | 10961571 2 | 36 | T:0.388889                        | G:0.611111   |
| chr28                                            | 10961978 2 | 36 | C:1                               | T:0          |
| chr28                                            | 10962777 2 | 28 | T:0.321429                        | C:0.678571   |
| chr28                                            | 10962807 2 | 40 | CGATCCTGGAGACCCGGGATCG:0.975      |              |
| C:0.025                                          |            |    |                                   |              |
| chr28                                            | 10962928 2 | 34 | TTAAAAAAA:0.970588                | T:           |
| 0.0294118                                        |            |    |                                   |              |
| chr28                                            | 10962929 2 | 36 | T:0.777778                        | TA:0.222222  |
| chr28                                            | 10962938 2 | 34 | T:0.382353                        | TA:0.617647  |

|              |          |   |    |                                    |                 |
|--------------|----------|---|----|------------------------------------|-----------------|
| chr28        | 10962939 | 2 | 34 | A:0.911765                         | AT:0.0882353    |
| chr28        | 10963007 | 2 | 36 | A:0.972222                         | G:0.0277778     |
| chr28        | 10963122 | 2 | 38 | A:0.815789                         | G:0.184211      |
| chr28        | 10963320 | 2 | 38 | CAA:0.631579                       | C:0.368421      |
| chr28        | 10963342 | 2 | 38 | G:0.552632                         | C:0.447368      |
| chr28        | 10963556 | 2 | 40 | C:0.65                             | CT:0.35         |
| chr28        | 10963558 | 2 | 40 | T:0.75                             | TTCTTTC:0.25    |
| chr28        | 10964557 | 2 | 34 | GC:0.647059                        | G:0.352941      |
| chr28        | 10964800 | 2 | 32 | C:0.59375                          | T:0.40625       |
| chr28        | 10964924 | 2 | 38 | T:1                                | C:0             |
| chr28        | 10965013 | 2 | 32 | C:0.90625                          | CT:0.09375      |
| chr28        | 10965016 | 2 | 34 | T:0.617647                         | TTTTTC:0.382353 |
| chr28        | 10965062 | 2 | 38 | C:0.263158                         | G:0.736842      |
| chr28        | 10965153 | 2 | 34 | G:1                                | A:0             |
| chr28        | 10965483 | 2 | 32 | A:0.5                              | ACC:0.5         |
| chr28        | 10965485 | 2 | 36 | C:0.861111                         | CCT:0.138889    |
| chr28        | 10965491 | 2 | 34 | C:0.794118                         | CCA:0.205882    |
| chr28        | 10965492 | 2 | 36 | A:0.861111                         | C:0.138889      |
| chr28        | 10965784 | 2 | 30 | AAGG:0.733333                      | A:0.266667      |
| chr28        | 10966005 | 2 | 32 | A:0.1875                           | G:0.8125        |
| chr28        | 10966282 | 2 | 8  | G:0.75                             | C:0.25          |
| chr28        | 10966579 | 2 | 34 | G:0.323529                         | A:0.676471      |
| chr28        | 10966622 | 2 | 32 | A:0.59375                          | G:0.40625       |
| chr28        | 10966652 | 2 | 30 | G:0.733333                         | A:0.266667      |
| chr28        | 10966710 | 2 | 36 | T:0.611111                         | C:0.388889      |
| chr28        | 10966731 | 2 | 36 | G:0.25                             | T:0.75          |
| chr28        | 10966732 | 2 | 36 | A:0.25                             | T:0.75          |
| chr28        | 10966981 | 2 | 38 | G:0.210526                         | A:0.789474      |
| chr28        | 10967204 | 2 | 36 | G:0.666667                         | A:0.333333      |
| chr28        | 10967625 | 2 | 38 | C:0.815789                         | T:0.184211      |
| chr28        | 10967688 | 2 | 40 | A:0.625                            | G:0.375         |
| chr28        | 10967758 | 2 | 32 | G:0.90625                          | C:0.09375       |
| chr28        | 10967940 | 2 | 40 | T:0.25                             | C:0.75          |
| chr28        | 10967997 | 2 | 40 | T:0.675                            | C:0.325         |
| chr28        | 10968267 | 2 | 40 | A:0.9                              | T:0.1           |
| chr28        | 10968892 | 2 | 38 | A:0.921053                         | G:0.0789474     |
| chr28        | 10969042 | 2 | 40 | T:1                                | C:0             |
| chr28        | 10969128 | 2 | 38 | G:0.842105                         | A:0.157895      |
| chr28        | 10969133 | 2 | 40 | T:0.675                            | C:0.325         |
| chr28        | 10969630 | 2 | 40 | A:0.25                             | G:0.75          |
| chr28        | 10969949 | 2 | 40 | A:0.2                              | ATTGT:0.8       |
| chr28        | 10969976 | 2 | 36 | G:0.861111                         | A:0.138889      |
| chr28        | 10970109 | 2 | 34 | G:0.970588                         | A:0.0294118     |
| chr28        | 10970473 | 2 | 34 | T:0.705882                         | C:0.294118      |
| chr28        | 10970631 | 2 | 36 | T:0.138889                         | A:0.861111      |
| chr28        | 10970698 | 2 | 38 | G:0.157895                         | A:0.842105      |
| chr28        | 10971002 | 2 | 36 | A:1                                | C:0             |
| chr28        | 10971194 | 2 | 34 | CAG:0.117647                       | C:0.882353      |
| chr28        | 10971312 | 2 | 40 | C:1                                | T:0             |
| chr28        | 10971398 | 2 | 38 | G:0.605263                         | A:0.394737      |
| chr28        | 10972104 | 2 | 36 | G:0.166667                         | A:0.833333      |
| chr28        | 10972185 | 4 | 38 | ATTT:0.421053                      | AT:0.105263     |
| ATT:0.421053 |          |   |    |                                    |                 |
| A:0.0526316  |          |   |    |                                    |                 |
| chr28        | 10972211 | 4 | 40 | CTTTATTTATTTATTTATTTATTTATTTATTTA: |                 |

|                      |            |                |                                |
|----------------------|------------|----------------|--------------------------------|
| 0.425                | C:0.2      | CTTTATTTA:0.05 | CTTTATTTATTTA:0.325            |
| chr28                | 10972309 2 | 38             | T:0.289474 C:0.710526          |
| chr28                | 10972350 2 | 38             | C:0.763158 T:0.236842          |
| chr28                | 10972364 2 | 40             | C:0.9 T:0.1                    |
| chr28                | 10972567 2 | 38             | G:0.868421 A:0.131579          |
| chr28                | 10972570 2 | 36             | G:0.166667 T:0.833333          |
| chr28                | 10972747 2 | 38             | GCCATCTTTTTCTGAAAAAGC:0.894737 |
| G:0.105263           |            |                |                                |
| chr28                | 10972778 2 | 32             | T:0.75 TC:0.25                 |
| chr28                | 10972787 2 | 32             | G:0.75 GTGGT:0.25              |
| chr28                | 10973528 2 | 38             | G:0.815789 A:0.184211          |
| chr28                | 10973608 2 | 36             | A:0.861111 G:0.138889          |
| chr28                | 10973714 2 | 36             | G:1 T:0                        |
| chr28                | 10973828 2 | 32             | C:1 T:0                        |
| chr28                | 10974020 2 | 34             | C:0.264706 A:0.735294          |
| chr28                | 10974066 2 | 34             | C:0.176471 T:0.823529          |
| chr28                | 10974133 2 | 32             | C:0.3125 T:0.6875              |
| chr28                | 10974294 2 | 38             | C:0.815789 T:0.184211          |
| chr28                | 10974322 2 | 34             | C:0.911765 T:0.0882353         |
| chr28                | 10974417 2 | 38             | G:0.605263 A:0.394737          |
| chr28                | 10974622 2 | 40             | T:0.175 TC:0.825               |
| chr28                | 10974634 2 | 40             | T:0.175 C:0.825                |
| chr28                | 10974958 2 | 40             | T:0.175 TTTC:0.825             |
| chr28                | 10975024 3 | 36             | GTTTT:0.472222 G:0.361111      |
| GT:0.166667          |            |                |                                |
| chr28                | 10975261 2 | 40             | G:1 A:0                        |
| chr28                | 10975398 2 | 34             | T:0.911765 C:0.0882353         |
| chr28                | 10975516 2 | 40             | A:0.225 G:0.775                |
| chr28                | 10975656 2 | 38             | G:0.921053 A:0.0789474         |
| chr28                | 10975693 2 | 36             | AT:1 A:0                       |
| chr28                | 10975698 2 | 36             | T:1 TA:0                       |
| chr28                | 10975702 4 | 36             | TAA:0.166667 T:0 AAA:0         |
| TA:0.833333          |            |                |                                |
| chr28                | 10975704 2 | 34             | A:0.970588 T:0.0294118         |
| chr28                | 10975763 2 | 38             | G:0.236842 T:0.763158          |
| chr28                | 10976105 2 | 8              | GA:0 G:1                       |
| chr28                | 10976177 2 | 22             | TTATG:0.318182 T:0.681818      |
| chr28                | 10976274 2 | 36             | TC:0.194444 T:0.805556         |
| chr28                | 10976373 2 | 36             | C:0.944444 T:0.0555556         |
| chr28                | 10976533 2 | 32             | C:0.90625 CAT:0.09375          |
| chr28                | 10976599 2 | 34             | G:0.117647 C:0.882353          |
| chr28                | 10976600 2 | 34             | A:0.117647 T:0.882353          |
| chr28                | 10976984 2 | 38             | T:0.342105 C:0.657895          |
| chr28                | 10977233 3 | 36             | C:0.444444 CAGAGAG:0.277778    |
| CAGAGAGAGAG:0.277778 |            |                |                                |
| chr28                | 10977288 2 | 26             | T:0.269231 C:0.730769          |
| chr28                | 10977367 2 | 30             | G:0.433333 A:0.566667          |
| chr28                | 10977383 2 | 30             | CA:0.9 C:0.1                   |
| chr28                | 10977384 2 | 32             | A:0.34375 G:0.65625            |
| chr28                | 10977394 2 | 32             | T:0.34375 A:0.65625            |
| chr28                | 10977396 2 | 32             | T:0.34375 A:0.65625            |
| chr28                | 10977449 2 | 24             | CGACA:0.916667 C:0.0833333     |
| chr28                | 10977452 3 | 34             | CAG:0.764706 C:0.0588235       |
| GAG:0.176471         |            |                |                                |

chr28 10977531 2 30 CATG:0.266667 C:0.733333  
chr28 10977593 2 26 T:0.0384615 C:0.961538  
chr28 10978165 3 38 T:0.684211 C:0.0789474  
G:0.236842  
chr28 10978203 2 38 G:0.868421 T:0.131579  
chr28 10978372 2 36 G:1 A:0  
chr28 10978381 2 36 A:0.611111 C:0.388889  
chr28 10978429 2 36 C:0.166667 CA:0.833333  
chr28 10978430 2 36 C:0.666667 T:0.333333  
chr28 10978442 2 36 G:0.166667 GGTA:0.833333  
chr28 10978513 2 32 A:0.09375 C:0.90625  
chr28 10978703 2 28 A:0.107143 C:0.892857  
chr28 10979470 2 38 C:1 T:0  
chr28 10979777 2 40 G:0.25 GTCTT:0.75  
chr28 10979849 2 40 T:0.625 A:0.375  
chr28 10979907 2 38 G:0.973684 A:0.0263158  
chr28 10979981 2 36 G:1 A:0  
chr28 10980312 2 34 G:0.970588 T:0.0294118  
chr28 10980412 2 36 T:0.888889 TA:0.111111  
chr28 10980524 2 36 A:0.611111 G:0.388889  
chr28 10980567 2 36 T:0.75 A:0.25  
chr28 10980625 2 36 T:0.694444 C:0.305556  
chr28 10981037 2 40 A:0.775 G:0.225  
chr28 10981304 2 38 T:0.763158 C:0.236842  
chr28 10981413 2 36 T:0.722222 C:0.277778  
chr28 10981744 2 36 T:0.75 C:0.25  
chr28 10981920 2 38 C:0.526316 T:0.473684  
chr28 10982003 2 36 A:0.527778 G:0.472222  
chr28 10982720 2 36 A:1 T:0  
chr28 10983100 2 38 G:0.789474 A:0.210526  
chr28 10983107 2 38 G:0.631579 A:0.368421  
chr28 10983144 2 36 C:1 CTTCT:0  
chr28 10983198 3 40 CAGAGAG:0.75 C:0.175  
CAGAGAG:0.075  
chr28 10983293 2 36 C:0.861111 A:0.138889  
chr28 10983352 2 40 CCTT:1 C:0  
chr28 10983401 2 40 A:0.85 G:0.15  
chr28 10983418 2 38 T:0.842105 G:0.157895  
chr28 10983603 2 34 G:0.176471 A:0.823529  
chr28 10983637 2 38 T:0.210526 C:0.789474  
chr28 10983774 2 36 A:0.333333 AGTCC:0.666667  
chr28 10983818 2 40 G:1 A:0  
chr28 10983977 2 38 G:0.684211 A:0.315789  
chr28 10984009 2 34 G:0.705882 A:0.294118  
chr28 10984411 2 38 C:0.789474 T:0.210526  
chr28 10984568 2 36 C:0.777778 A:0.222222  
chr28 10984869 2 38 G:0.210526 A:0.789474  
chr28 10984997 2 34 T:0.117647 C:0.882353  
chr28 10985087 2 40 C:0.25 T:0.75  
chr28 10985273 4 40 CTG:0.55 C:0.225 CTGTG:0  
CTGTGTGTGTGTGTGTGTGTGTGTGTGTG:0.225  
chr28 10985285 2 40 G:0.725  
GTGTGTGTGTGTGTGTGTGTGTGTGTGTGTGTGTGTGTGTG:0.275  
chr28 10985313 2 38 A:0.263158 G:0.736842

|              |            |    |                   |              |
|--------------|------------|----|-------------------|--------------|
| chr28        | 10985337 2 | 38 | A:0.263158        | G:0.736842   |
| chr28        | 10985486 2 | 34 | A:0.764706        | C:0.235294   |
| chr28        | 10985523 2 | 36 | T:0.361111        | C:0.638889   |
| chr28        | 10985564 2 | 34 | C:0.794118        | CT:0.205882  |
| chr28        | 10985604 2 | 38 | AT:0.789474       | A:0.210526   |
| chr28        | 10985656 2 | 38 | T:0.710526        | C:0.289474   |
| chr28        | 10985748 2 | 34 | C:0.735294        | CT:0.264706  |
| chr28        | 10985921 2 | 34 | A:0.676471        | AT:0.323529  |
| chr28        | 10986385 2 | 38 | C:0.921053        | T:0.0789474  |
| chr28        | 10986427 2 | 36 | T:0.805556        | C:0.194444   |
| chr28        | 10986678 2 | 38 | T:0.842105        | G:0.157895   |
| chr28        | 10986718 2 | 40 | A:0.8 G:0.2       |              |
| chr28        | 10986842 2 | 38 | G:0.894737        | A:0.105263   |
| chr28        | 10986885 2 | 40 | G:0.8 T:0.2       |              |
| chr28        | 10987378 2 | 36 | C:0.111111        | A:0.888889   |
| chr28        | 10987477 2 | 36 | T:0.888889        | A:0.111111   |
| chr28        | 10987505 2 | 40 | T:0.225 G:0.775   |              |
| chr28        | 10987590 2 | 40 | T:0.225 C:0.775   |              |
| chr28        | 10987599 2 | 40 | C:0.225 G:0.775   |              |
| chr28        | 10987920 2 | 38 | A:0.842105        | G:0.157895   |
| chr28        | 10987986 2 | 34 | T:0.852941        | C:0.147059   |
| chr28        | 10988012 2 | 34 | C:1 T:0           |              |
| chr28        | 10988453 2 | 36 | C:0.972222        | CG:0.0277778 |
| chr28        | 10988522 2 | 38 | C:0.657895        | T:0.342105   |
| chr28        | 10988580 2 | 34 | A:0.882353        | G:0.117647   |
| chr28        | 10988882 2 | 34 | C:0.882353        | T:0.117647   |
| chr28        | 10988978 2 | 38 | CT:0.710526       | C:0.289474   |
| chr28        | 10989264 2 | 40 | C:0.325 T:0.675   |              |
| chr28        | 10989268 2 | 40 | C:0.325 T:0.675   |              |
| chr28        | 10989464 2 | 38 | A:1 C:0           |              |
| chr28        | 10989866 2 | 38 | C:0.894737        | A:0.105263   |
| chr28        | 10990280 2 | 32 | A:0.875 T:0.125   |              |
| chr28        | 10990637 2 | 38 | T:0.631579        | G:0.368421   |
| chr28        | 10990840 2 | 40 | A:0.9 G:0.1       |              |
| chr28        | 10991115 2 | 34 | TTTC:0.705882     | T:0.294118   |
| chr28        | 10991142 3 | 26 | T:0.423077        | TA:0.307692  |
| TAA:0.269231 |            |    |                   |              |
| chr28        | 10991340 2 | 36 | T:0.527778        | C:0.472222   |
| chr28        | 10991590 2 | 36 | G:1 A:0           |              |
| chr28        | 10991684 2 | 34 | A:0.941176        | T:0.0588235  |
| chr28        | 10991696 2 | 34 | T:0.941176        | C:0.0588235  |
| chr28        | 10991738 2 | 34 | A:0.941176        | G:0.0588235  |
| chr28        | 10991766 2 | 34 | A:0.882353        | G:0.117647   |
| chr28        | 10991773 2 | 34 | G:0.882353        | A:0.117647   |
| chr28        | 10991800 2 | 36 | A:0.472222        | G:0.527778   |
| chr28        | 10991874 2 | 36 | A:0.861111        | C:0.138889   |
| chr28        | 10992336 2 | 32 | C:0.9375 T:0.0625 |              |
| chr28        | 10992547 2 | 36 | G:0.833333        | A:0.166667   |
| chr28        | 10992571 2 | 36 | C:0.888889        | A:0.111111   |
| chr28        | 10992572 2 | 36 | CG:0.888889       | C:0.111111   |
| chr28        | 10992573 2 | 36 | G:0.694444        | C:0.305556   |
| chr28        | 10992700 2 | 32 | T:0.3125 C:0.6875 |              |
| chr28        | 10992714 2 | 32 | C:0.40625         | T:0.59375    |
| chr28        | 10992715 2 | 32 | G:1 A:0           |              |

|       |                   |   |    |                               |                     |
|-------|-------------------|---|----|-------------------------------|---------------------|
| chr28 | 10992822          | 2 | 34 | G:0.882353                    | GC:0.117647         |
| chr28 | 10993329          | 2 | 38 | GC:0.631579                   | G:0.368421          |
| chr28 | 10993330          | 2 | 38 | CCCCAG:0.473684               | C:0.526316          |
| chr28 | 10993332          | 2 | 38 | C:0.894737                    | CTG:0.105263        |
| chr28 | 10993333          | 2 | 38 | CAG:0.894737                  | C:0.105263          |
| chr28 | 10993335          | 2 | 38 | G:0.631579                    | GC:0.368421         |
| chr28 | 10993525          | 2 | 36 | A:0.666667                    | G:0.333333          |
| chr28 | 10993669          | 2 | 32 | A:0.65625                     | G:0.34375           |
| chr28 | 10993730          | 2 | 32 | G:1                           | GGTGT:0             |
| chr28 | 10993759          | 2 | 32 | GTA:0.9375                    | G:0.0625            |
| chr28 | 10993761          | 2 | 28 | A:0.821429                    | G:0.178571          |
| chr28 | 10993763          | 2 | 28 | A:0.857143                    | G:0.142857          |
| chr28 | 10993946          | 2 | 32 | GA:0.4375                     | G:0.5625            |
| chr28 | 10994209          | 2 | 36 | TA:0.944444                   | T:0.0555556         |
| chr28 | 10994309          | 2 | 34 | C:0.529412                    | T:0.470588          |
| chr28 | 10994311          | 2 | 34 | A:0.529412                    | G:0.470588          |
| chr28 | 10994906          | 2 | 36 | G:0.333333                    | A:0.666667          |
| chr28 | 10995117          | 2 | 38 | G:1                           | A:0                 |
| chr28 | 10995247          | 2 | 34 | T:0.529412                    | G:0.470588          |
| chr28 | 10995395          | 2 | 34 | C:0.323529                    | G:0.676471          |
| chr28 | 10995495          | 2 | 36 | A:0.5                         | G:0.5               |
| chr28 | 10995595          | 2 | 36 | A:0.638889                    | C:0.361111          |
| chr28 | 10995777          | 2 | 30 | CTG:0.433333                  | C:0.566667          |
| chr28 | 10996035          | 2 | 28 | G:0.678571                    | C:0.321429          |
| chr28 | 10996211          | 2 | 34 | A:0.676471                    | AG:0.323529         |
| chr28 | 10996475          | 2 | 36 | G:1                           | A:0                 |
| chr28 | 10996540          | 2 | 32 | A:0.375                       | T:0.625             |
| chr28 | 10996665          | 2 | 38 | C:0.868421                    | T:0.131579          |
| chr28 | 10996729          | 2 | 34 | C:0.382353                    | T:0.617647          |
| chr28 | 10996829          | 2 | 38 | A:0.657895                    | G:0.342105          |
| chr28 | 10996877          | 6 | 38 | CGTGTGTGTGTGTGTGT:0.315789    |                     |
|       | C:0.526316        |   |    | CGTGTGT:0.0263158             | CGTGTGTGT:0.0789474 |
|       | CGTGTGTGTGTGTGT:0 |   |    | CGTGTGTGTGTGTGTGTGT:0.0526316 |                     |
| chr28 | 10996947          | 2 | 36 | A:0.555556                    | G:0.444444          |
| chr28 | 10997231          | 2 | 40 | A:0.65                        | G:0.35              |
| chr28 | 10997649          | 2 | 34 | G:0.382353                    | GT:0.617647         |
| chr28 | 10997759          | 2 | 38 | A:0.289474                    | G:0.710526          |
| chr28 | 10997837          | 2 | 36 | T:0.555556                    | C:0.444444          |
| chr28 | 10997840          | 2 | 34 | GCC:1                         | G:0                 |
| chr28 | 10997871          | 2 | 36 | C:0.916667                    | G:0.0833333         |
| chr28 | 10997960          | 2 | 38 | GGCTCTCTCTCCCCT:0.368421      | G:                  |
|       | 0.631579          |   |    |                               |                     |
| chr28 | 10998658          | 2 | 36 | ATG:1                         | A:0                 |
| chr28 | 10998674          | 2 | 36 | G:0.555556                    | GT:0.444444         |
| chr28 | 10998675          | 3 | 38 | G:0.578947                    | GT:0.157895         |
|       | GTGTGTGT:0.263158 |   |    |                               |                     |
| chr28 | 10998719          | 2 | 34 | C:0.647059                    | T:0.352941          |
| chr28 | 10998878          | 2 | 28 | A:0.678571                    | G:0.321429          |
| chr28 | 10998898          | 2 | 28 | T:0.678571                    | C:0.321429          |
| chr28 | 10998904          | 2 | 28 | T:0.678571                    | C:0.321429          |
| chr28 | 10998976          | 2 | 24 | G:0.125                       | C:0.875             |
| chr28 | 10999062          | 2 | 24 | C:0.375                       | CG:0.625            |
| chr28 | 10999116          | 2 | 20 | CGT:0.6                       | C:0.4               |
| chr28 | 10999539          | 2 | 8  | G:0                           | GT:1                |

|                                            |            |    |                             |
|--------------------------------------------|------------|----|-----------------------------|
| chr28                                      | 11000448 2 | 32 | G:0.8125 A:0.1875           |
| chr28                                      | 11000873 2 | 38 | G:1 T:0                     |
| chr28                                      | 11000897 2 | 38 | G:0.921053 A:0.0789474      |
| chr28                                      | 11001070 2 | 38 | G:1 T:0                     |
| chr28                                      | 11001281 2 | 38 | G:0.394737 A:0.605263       |
| chr28                                      | 11001339 2 | 34 | A:0.441176 G:0.558824       |
| chr28                                      | 11001408 2 | 40 | GTTCC:0.475 G:0.525         |
| chr28                                      | 11001623 2 | 32 | T:0.90625 C:0.09375         |
| chr28                                      | 11001813 2 | 34 | T:0.5 C:0.5                 |
| chr28                                      | 11001908 2 | 34 | C:0.764706 T:0.235294       |
| chr28                                      | 11001982 2 | 40 | C:0.675 T:0.325             |
| chr28                                      | 11002146 2 | 34 | A:1 AC:0                    |
| chr28                                      | 11002454 2 | 40 | AAACAAC:0.9 A:0.1           |
| chr28                                      | 11002457 2 | 40 | C:0.425 T:0.575             |
| chr28                                      | 11002463 2 | 40 | C:0.9 T:0.1                 |
| chr28                                      | 11002469 2 | 40 | CAACAACAAT:0.425 C:0.575    |
| chr28                                      | 11003002 4 | 36 | A:0.333333 AT:0.0833333     |
| ATT:0.5 ATTTT:0.0833333                    |            |    |                             |
| chr28                                      | 11003098 2 | 38 | A:0.710526                  |
| AACTAAATTTTGCTTATTAATAAAATTTTAAAC:0.289474 |            |    |                             |
| chr28                                      | 11003273 2 | 38 | AAAAT:1 A:0                 |
| chr28                                      | 11003288 2 | 40 | A:0.95 AT:0.05              |
| chr28                                      | 11003289 2 | 38 | TAAA:1 T:0                  |
| chr28                                      | 11003290 2 | 40 | A:0.95 AATT:0.05            |
| chr28                                      | 11003293 2 | 38 | TA:1 T:0                    |
| chr28                                      | 11003294 2 | 38 | A:0.947368 T:0.0526316      |
| chr28                                      | 11003334 2 | 34 | A:0.911765 C:0.0882353      |
| chr28                                      | 11003363 2 | 38 | A:0.631579 G:0.368421       |
| chr28                                      | 11003468 2 | 36 | GTTTCTTTTCTTCC:0.972222 G:  |
| 0.0277778                                  |            |    |                             |
| chr28                                      | 11003555 2 | 40 | T:0.625 TCTA:0.375          |
| chr28                                      | 11003575 2 | 40 | A:0.675 G:0.325             |
| chr28                                      | 11003578 2 | 40 | C:1 T:0                     |
| chr28                                      | 11003603 2 | 34 | C:0.970588 CT:0.0294118     |
| chr28                                      | 11003607 2 | 40 | T:0.95 C:0.05               |
| chr28                                      | 11003633 3 | 38 | C:0.421053 CAGAGAG:0.578947 |
| CAGAGAGAGAG:0                              |            |    |                             |
| chr28                                      | 11003635 2 | 40 | G:1 GAGAGAA:0               |
| chr28                                      | 11003644 2 | 36 | T:0.416667 TGA:0.583333     |
| chr28                                      | 11003846 2 | 34 | C:0.323529 CTT:0.676471     |
| chr28                                      | 11004025 2 | 28 | G:1 A:0                     |
| chr28                                      | 11004046 2 | 28 | G:1 A:0                     |
| chr28                                      | 11004192 2 | 36 | C:0.611111 T:0.388889       |
| chr28                                      | 11004311 2 | 36 | G:0.361111 A:0.638889       |
| chr28                                      | 11004606 2 | 32 | A:1 G:0                     |
| chr28                                      | 11004722 2 | 30 | G:0.633333 A:0.366667       |
| chr28                                      | 11004801 2 | 40 | C:1 A:0                     |
| chr28                                      | 11005123 2 | 38 | T:0.421053 C:0.578947       |
| chr28                                      | 11005235 2 | 32 | C:0.4375 T:0.5625           |
| chr28                                      | 11005298 2 | 40 | A:0.625 G:0.375             |
| chr28                                      | 11005327 2 | 40 | G:1 C:0                     |
| chr28                                      | 11005435 2 | 34 | T:0.617647 C:0.382353       |
| chr28                                      | 11005509 2 | 40 | G:1 A:0                     |
| chr28                                      | 11005663 2 | 36 | G:0.444444 C:0.555556       |



|       |                       |    |                   |                |
|-------|-----------------------|----|-------------------|----------------|
| chr28 | 11005676 2            | 36 | G:0.361111        | A:0.638889     |
| chr28 | 11006028 2            | 38 | T:0.631579        | C:0.368421     |
| chr28 | 11006142 2            | 34 | C:0.382353        | T:0.617647     |
| chr28 | 11006203 2            | 36 | T:0.333333        | C:0.666667     |
| chr28 | 11006223 4            | 40 | C:0.375 CTGAA:0   | CTGAATGAACGAA: |
| 0.525 | CTGAATGAACGAATGAA:0.1 |    |                   |                |
| chr28 | 11006246 2            | 40 | G:0.375 A:0.625   |                |
| chr28 | 11006397 2            | 34 | C:0.529412        | CT:0.470588    |
| chr28 | 11006726 2            | 32 | T:0.375 C:0.625   |                |
| chr28 | 11006737 2            | 32 | AC:1 A:0          |                |
| chr28 | 11006739 2            | 30 | C:0.4 T:0.6       |                |
| chr28 | 11006741 2            | 32 | C:1 T:0           |                |
| chr28 | 11006750 2            | 28 | G:0.428571        | A:0.571429     |
| chr28 | 11006751 2            | 28 | C:0.428571        | T:0.571429     |
| chr28 | 11006837 2            | 36 | A:0.888889        | C:0.111111     |
| chr28 | 11006936 2            | 36 | C:0.388889        | T:0.611111     |
| chr28 | 11006979 2            | 32 | A:0.65625         | G:0.34375      |
| chr28 | 11006991 2            | 32 | A:0.6875 G:0.3125 |                |
| chr28 | 11007002 2            | 34 | G:0.705882        | GGA:0.294118   |
| chr28 | 11007058 2            | 32 | A:0.71875         | T:0.28125      |
| chr28 | 11007138 2            | 36 | C:0.583333        | T:0.416667     |
| chr28 | 11007215 2            | 36 | T:0.361111        | C:0.638889     |
| chr28 | 11007601 2            | 36 | A:0.638889        | C:0.361111     |
| chr28 | 11007664 2            | 38 | A:0.631579        | T:0.368421     |
| chr28 | 11007697 2            | 36 | G:0.583333        | T:0.416667     |
| chr28 | 11007727 2            | 34 | AG:0.588235       | A:0.411765     |
| chr28 | 11007782 2            | 36 | A:0.638889        | G:0.361111     |
| chr28 | 11007923 2            | 36 | C:0.388889        | G:0.611111     |
| chr28 | 11008346 2            | 34 | T:0.323529        | C:0.676471     |
| chr28 | 11008356 2            | 38 | G:0.394737        | GC:0.605263    |
| chr28 | 11008376 2            | 38 | A:0.421053        | G:0.578947     |
| chr28 | 11008391 2            | 36 | T:0.388889        | A:0.611111     |
| chr28 | 11008404 2            | 34 | T:1 G:0           |                |
| chr28 | 11008522 2            | 36 | A:0.222222        | G:0.777778     |
| chr28 | 11008580 2            | 40 | G:0.375 A:0.625   |                |
| chr28 | 11008589 2            | 40 | A:0.375 G:0.625   |                |
| chr28 | 11008669 2            | 36 | AT:0.305556       | A:0.694444     |
| chr28 | 11008980 2            | 34 | A:0.558824        | G:0.441176     |
| chr28 | 11008999 2            | 34 | G:0.352941        | A:0.647059     |
| chr28 | 11009011 2            | 34 | AG:1 A:0          |                |
| chr28 | 11009048 2            | 36 | T:0.694444        | C:0.305556     |
| chr28 | 11009258 2            | 34 | G:0.558824        | A:0.441176     |
| chr28 | 11009314 2            | 34 | G:0.735294        | A:0.264706     |
| chr28 | 11009484 2            | 36 | G:0.361111        | C:0.638889     |
| chr28 | 11009729 2            | 34 | G:0.852941        | A:0.147059     |
| chr28 | 11009792 2            | 34 | T:0.264706        | C:0.735294     |
| chr28 | 11009928 2            | 36 | A:1 C:0           |                |
| chr28 | 11010161 2            | 38 | A:0.368421        | G:0.631579     |
| chr28 | 11010227 2            | 36 | C:0.583333        | A:0.416667     |
| chr28 | 11010228 2            | 36 | A:1 C:0           |                |
| chr28 | 11010301 2            | 30 | G:0.4 C:0.6       |                |
| chr28 | 11010623 2            | 32 | C:0.28125         | T:0.71875      |
| chr28 | 11010763 2            | 38 | A:0.710526        | G:0.289474     |
| chr28 | 11010769 2            | 38 | A:0.710526        | G:0.289474     |

|       |                     |   |    |                       |                |          |
|-------|---------------------|---|----|-----------------------|----------------|----------|
| chr28 | 11010775            | 2 | 38 | AAG:1                 | A:0            |          |
| chr28 | 11010793            | 2 | 38 | C:1                   | T:0            |          |
| chr28 | 11010810            | 2 | 40 | C:0.675               | CCTTGGG:0.325  |          |
| chr28 | 11010926            | 2 | 34 | T:0.705882            | C:0.294118     |          |
| chr28 | 11010949            | 2 | 34 | A:0.705882            | T:0.294118     |          |
| chr28 | 11011061            | 2 | 34 | C:1                   | T:0            |          |
| chr28 | 11011219            | 2 | 28 | T:0.5                 | C:0.5          |          |
| chr28 | 11011252            | 2 | 38 | G:1                   | A:0            |          |
| chr28 | 11011267            | 2 | 38 | G:0.421053            | A:0.578947     |          |
| chr28 | 11011340            | 3 | 40 | TAA:0.35              | T:0.65         | TAAAAA:0 |
| chr28 | 11011350            | 2 | 40 | TAAAA:0.35            | T:0.65         |          |
| chr28 | 11011559            | 2 | 34 | G:0.411765            | A:0.588235     |          |
| chr28 | 11011876            | 2 | 32 | C:1                   | T:0            |          |
| chr28 | 11011927            | 2 | 36 | C:0.305556            | CCT:0.694444   |          |
| chr28 | 11011978            | 3 | 34 | T:0.5                 | TA:0.0294118   | TAA:     |
|       | 0.470588            |   |    |                       |                |          |
| chr28 | 11012037            | 2 | 38 | A:0.394737            | ATGTAGGCAGAGG: |          |
|       | 0.605263            |   |    |                       |                |          |
| chr28 | 11012378            | 2 | 36 | A:0.666667            | G:0.333333     |          |
| chr28 | 11012386            | 2 | 36 | A:0.666667            | G:0.333333     |          |
| chr28 | 11012542            | 2 | 38 | G:0.684211            | C:0.315789     |          |
| chr28 | 11013044            | 2 | 38 | A:0.315789            | C:0.684211     |          |
| chr28 | 11013094            | 2 | 36 | G:0.694444            | T:0.305556     |          |
| chr28 | 11013431            | 2 | 22 | G:0.909091            | T:0.0909091    |          |
| chr28 | 11013511            | 2 | 32 | C:0.375               | T:0.625        |          |
| chr28 | 11013592            | 2 | 22 | G:0.954545            | A:0.0454545    |          |
| chr28 | 11013647            | 2 | 26 | TTG:0.192308          | T:0.807692     |          |
| chr28 | 11013660            | 2 | 26 | G:0.192308            | C:0.807692     |          |
| chr28 | 11014025            | 2 | 38 | C:0.368421            | G:0.631579     |          |
| chr28 | 11014797            | 2 | 30 | A:0.766667            | G:0.233333     |          |
| chr28 | 11015379            | 2 | 36 | T:0.361111            | C:0.638889     |          |
| chr28 | 11015536            | 2 | 38 | C:1                   | T:0            |          |
| chr28 | 11015724            | 2 | 32 | C:1                   | T:0            |          |
| chr28 | 11015901            | 2 | 38 | A:1                   | T:0            |          |
| chr28 | 11015942            | 4 | 38 | C:0.973684            | CAG:0          | CAGAGAG: |
|       | 0                   |   |    |                       |                |          |
|       | CAGAGAGAG:0.0263158 |   |    |                       |                |          |
| chr28 | 11015944            | 4 | 38 | C:0.578947            | G:0.0263158    |          |
|       | CAGAGAGAG:0.342105  |   |    | CAGAGAGAGAG:0.0526316 |                |          |
| chr28 | 11015946            | 2 | 38 | C:0.5                 | G:0.5          |          |
| chr28 | 11016331            | 2 | 34 | C:0.5                 | T:0.5          |          |
| chr28 | 11016384            | 2 | 36 | C:0.527778            | T:0.472222     |          |
| chr28 | 11016567            | 2 | 36 | C:1                   | T:0            |          |
| chr28 | 11016701            | 2 | 20 | GGGT:0.75             | G:0.25         |          |
| chr28 | 11016702            | 2 | 20 | GGT:0.35              | G:0.65         |          |
| chr28 | 11017185            | 2 | 30 | T:1                   | C:0            |          |
| chr28 | 11017239            | 2 | 32 | G:0.4375              | A:0.5625       |          |
| chr28 | 11017242            | 2 | 34 | G:0.529412            | A:0.470588     |          |
| chr28 | 11017398            | 2 | 32 | T:1                   | C:0            |          |
| chr28 | 11017488            | 2 | 38 | C:0.552632            | G:0.447368     |          |
| chr28 | 11017968            | 2 | 38 | C:0.394737            | T:0.605263     |          |
| chr28 | 11018133            | 2 | 30 | C:0.4                 | T:0.6          |          |
| chr28 | 11018217            | 2 | 38 | C:1                   | T:0            |          |
| chr28 | 11018324            | 2 | 32 | GT:1                  | G:0            |          |
| chr28 | 11018561            | 2 | 36 | C:0.972222            | T:0.0277778    |          |

|       |            |          |    |                |         |             |
|-------|------------|----------|----|----------------|---------|-------------|
| chr28 | 11018591   | 2        | 32 | C:1            | T:0     |             |
| chr28 | 11018792   | 2        | 30 | A:0.533333     |         | C:0.466667  |
| chr28 | 11018807   | 3        | 38 | TTTTA:0.473684 |         | T:0.394737  |
|       | TTTTATTTA: | 0.131579 |    |                |         |             |
| chr28 | 11018811   | 2        | 34 | AT:1           | A:0     |             |
| chr28 | 11019252   | 2        | 40 | G:1            | A:0     |             |
| chr28 | 11019519   | 2        | 36 | A:0.388889     |         | G:0.611111  |
| chr28 | 11019735   | 2        | 40 | C:0.35         | T:0.65  |             |
| chr28 | 11020123   | 2        | 36 | G:0.972222     |         | A:0.0277778 |
| chr28 | 11020179   | 2        | 36 | T:1            | C:0     |             |
| chr28 | 11020202   | 2        | 36 | GT:0.638889    |         | G:0.361111  |
| chr28 | 11020349   | 2        | 32 | G:0.25         | GT:0.75 |             |
| chr28 | 11020376   | 2        | 32 | C:0.96875      |         | T:0.03125   |
| chr28 | 11020781   | 2        | 30 | G:1            | A:0     |             |
| chr28 | 11021012   | 2        | 38 | G:0.605263     |         | T:0.394737  |
| chr28 | 11021017   | 2        | 38 | G:0.605263     |         | A:0.394737  |
| chr28 | 11021468   | 2        | 36 | G:1            | A:0     |             |
| chr28 | 11021915   | 2        | 40 | T:0.35         | G:0.65  |             |
| chr28 | 11022233   | 2        | 36 | C:0.583333     |         | T:0.416667  |
| chr28 | 11022346   | 2        | 38 | A:1            | G:0     |             |
| chr28 | 11022767   | 2        | 30 | A:1            | G:0     |             |
| chr28 | 11023439   | 2        | 38 | G:0.447368     |         | T:0.552632  |
| chr28 | 11023556   | 2        | 38 | C:1            | T:0     |             |
| chr28 | 11023666   | 2        | 38 | T:0.657895     |         | C:0.342105  |
| chr28 | 11023689   | 2        | 38 | T:0.657895     |         | C:0.342105  |
| chr28 | 11023703   | 2        | 38 | G:1            | A:0     |             |
| chr28 | 11023783   | 2        | 40 | C:1            | T:0     |             |
| chr28 | 11024066   | 2        | 36 | G:0.611111     |         | C:0.388889  |
| chr28 | 11024127   | 2        | 38 | T:1            | A:0     |             |
| chr28 | 11024250   | 2        | 38 | T:0.368421     |         | G:0.631579  |
| chr28 | 11024596   | 2        | 32 | C:1            | T:0     |             |
| chr28 | 11024783   | 2        | 32 | A:0.59375      |         | AC:0.40625  |
| chr28 | 11025055   | 2        | 38 | C:1            | T:0     |             |
| chr28 | 11025116   | 2        | 38 | T:0.473684     |         | G:0.526316  |
| chr28 | 11025149   | 2        | 38 | CA:0.894737    |         | C:0.105263  |
| chr28 | 11025326   | 2        | 40 | AG:0.625       | A:0.375 |             |
| chr28 | 11025647   | 2        | 38 | G:1            | A:0     |             |
| chr28 | 11025713   | 2        | 36 | C:0.305556     |         | T:0.694444  |
| chr28 | 11026043   | 2        | 32 | C:0.59375      |         | CTA:0.40625 |
| chr28 | 11026217   | 2        | 36 | G:0.416667     |         | GC:0.583333 |
| chr28 | 11026485   | 2        | 36 | G:1            | A:0     |             |
| chr28 | 11026700   | 2        | 36 | T:0.527778     |         | C:0.472222  |
| chr28 | 11026905   | 2        | 34 | G:1            | A:0     |             |
| chr28 | 11027254   | 2        | 34 | G:0.382353     |         | A:0.617647  |
| chr28 | 11027319   | 2        | 38 | C:1            | T:0     |             |
| chr28 | 11027331   | 2        | 36 | TG:0.361111    |         | T:0.638889  |
| chr28 | 11027534   | 2        | 32 | C:1            | T:0     |             |
| chr28 | 11027768   | 2        | 36 | C:0.638889     |         | G:0.361111  |
| chr28 | 11027837   | 2        | 36 | T:0.583333     |         | C:0.416667  |
| chr28 | 11028083   | 2        | 36 | T:0.888889     |         | G:0.111111  |
| chr28 | 11028211   | 2        | 40 | T:0.95         | C:0.05  |             |
| chr28 | 11028231   | 2        | 40 | A:0.95         | G:0.05  |             |
| chr28 | 11028232   | 2        | 40 | G:0.95         | C:0.05  |             |
| chr28 | 11028451   | 2        | 36 | T:0.416667     |         | C:0.583333  |

|                                        |                             |   |    |                   |                |
|----------------------------------------|-----------------------------|---|----|-------------------|----------------|
| chr28                                  | 11028454                    | 2 | 36 | C:0.416667        | T:0.583333     |
| chr28                                  | 11028918                    | 2 | 40 | A:0.975 G:0.025   |                |
| chr28                                  | 11029112                    | 2 | 38 | C:0.921053        | T:0.0789474    |
| chr28                                  | 11029411                    | 2 | 38 | C:1 T:0           |                |
| chr28                                  | 11029473                    | 2 | 36 | T:0.972222        | A:0.0277778    |
| chr28                                  | 11029699                    | 2 | 34 | C:0.911765        | T:0.0882353    |
| chr28                                  | 11029723                    | 2 | 32 | T:1 C:0           |                |
| chr28                                  | 11029790                    | 2 | 20 | G:0.3 C:0.7       |                |
| chr28                                  | 11029936                    | 2 | 24 | A:0.583333        | G:0.416667     |
| chr28                                  | 11030002                    | 2 | 32 | A:0.46875         | G:0.53125      |
| chr28                                  | 11030312                    | 2 | 36 | T:0.5 C:0.5       |                |
| chr28                                  | 11030318                    | 2 | 34 | G:1 T:0           |                |
| chr28                                  | 11030336                    | 2 | 30 | A:1 G:0           |                |
| chr28                                  | 11030502                    | 2 | 38 | C:0.421053        | CT:0.578947    |
| chr28                                  | 11030527                    | 2 | 40 | C:1 T:0           |                |
| chr28                                  | 11030746                    | 2 | 36 | T:0.527778        | C:0.472222     |
| chr28                                  | 11031145                    | 2 | 38 | G:0.421053        | A:0.578947     |
| chr28                                  | 11031243                    | 2 | 30 | A:0.566667        | G:0.433333     |
| chr28                                  | 11031297                    | 2 | 36 | A:0.472222        | G:0.527778     |
| chr28                                  | 11031331                    | 2 | 38 | C:0.447368        | T:0.552632     |
| chr28                                  | 11031449                    | 2 | 38 | G:0.789474        | A:0.210526     |
| chr28                                  | 11031494                    | 2 | 38 | C:0.5 G:0.5       |                |
| chr28                                  | 11031525                    | 2 | 38 | G:0.526316        | A:0.473684     |
| chr28                                  | 11031693                    | 2 | 38 | G:1 A:0           |                |
| chr28                                  | 11031743                    | 2 | 36 | A:0.388889        | C:0.611111     |
| chr28                                  | 11031794                    | 2 | 40 | T:1 C:0           |                |
| chr28                                  | 11031909                    | 2 | 32 | T:0.5 A:0.5       |                |
| chr28                                  | 11031910                    | 2 | 32 | C:0.5 T:0.5       |                |
| chr28                                  | 11031948                    | 2 | 38 | T:0.368421        | C:0.631579     |
| chr28                                  | 11031967                    | 2 | 38 | C:0.578947        | T:0.421053     |
| chr28                                  | 11032012                    | 2 | 40 | C:1 T:0           |                |
| chr28                                  | 11032121                    | 2 | 36 | GTATAAGA:0.527778 | G:<br>0.472222 |
| chr28                                  | 11032172                    | 2 | 36 | T:0.555556        | C:0.444444     |
| chr28                                  | 11032245                    | 2 | 36 | T:0.555556        | G:0.444444     |
| chr28                                  | 11032317                    | 2 | 24 | T:0.208333        | A:0.791667     |
| chr28                                  | 11032686                    | 2 | 36 | C:0.5 CTTT:0.5    |                |
| chr28                                  | 11032702                    | 4 | 40 | TTTTA:0.65        | T:0.075        |
| TTTTATTTA:0.1                          | TTTTATTTATTTATTTATTTA:0.175 |   |    |                   |                |
| chr28                                  | 11032740                    | 2 | 30 | C:0.533333        | CAG:0.466667   |
| chr28                                  | 11032795                    | 2 | 34 | G:0.588235        | A:0.411765     |
| chr28                                  | 11032824                    | 2 | 36 | C:0.527778        | T:0.472222     |
| chr28                                  | 11032875                    | 2 | 36 | T:0.472222        | C:0.527778     |
| chr28                                  | 11032919                    | 2 | 40 |                   |                |
| TCTTTATCTAGTATGATCTCTAGACACTTTCTTTGC:1 | T:0                         |   |    |                   |                |
| chr28                                  | 11032957                    | 2 | 40 | T:1 C:0           |                |
| chr28                                  | 11033126                    | 2 | 38 | C:0.421053        | T:0.578947     |
| chr28                                  | 11033139                    | 2 | 38 | G:0.421053        | A:0.578947     |
| chr28                                  | 11033239                    | 2 | 40 | A:0.925 C:0.075   |                |
| chr28                                  | 11033276                    | 2 | 34 | T:0.529412        | C:0.470588     |
| chr28                                  | 11033358                    | 2 | 40 | G:1 A:0           |                |
| chr28                                  | 11033557                    | 2 | 36 | C:1 T:0           |                |
| chr28                                  | 11033749                    | 2 | 36 | T:0.444444        | G:0.555556     |
| chr28                                  | 11033753                    | 2 | 36 | T:0.444444        | C:0.555556     |

|                                              |            |    |                   |                |
|----------------------------------------------|------------|----|-------------------|----------------|
| chr28                                        | 11034008 2 | 36 | C:0.444444        | T:0.555556     |
| chr28                                        | 11034015 2 | 36 | G:0.416667        | A:0.583333     |
| chr28                                        | 11034065 2 | 38 | C:1 T:0           |                |
| chr28                                        | 11034156 2 | 36 | C:0.972222        | T:0.0277778    |
| chr28                                        | 11034325 2 | 40 | G:0.55 A:0.45     |                |
| chr28                                        | 11034469 2 | 24 | C:0.916667        | CTTT:0.0833333 |
| chr28                                        | 11034523 2 | 36 | CTT:0.611111      | C:0.388889     |
| chr28                                        | 11034636 2 | 34 | C:0.588235        | T:0.411765     |
| chr28                                        | 11034645 2 | 38 | G:0.973684        | GT:0.0263158   |
| chr28                                        | 11034647 2 | 38 | GCCCAACC:0.973684 | G:             |
| 0.0263158                                    |            |    |                   |                |
| chr28                                        | 11034970 2 | 38 | G:0.973684        | A:0.0263158    |
| chr28                                        | 11035099 2 | 36 | G:0.5 A:0.5       |                |
| chr28                                        | 11035355 2 | 36 | G:1 A:0           |                |
| chr28                                        | 11035439 2 | 40 | C:1 T:0           |                |
| chr28                                        | 11035764 2 | 34 | G:0.558824        | A:0.441176     |
| chr28                                        | 11035877 2 | 36 | C:0.555556        | T:0.444444     |
| chr28                                        | 11036037 2 | 36 | C:0.861111        | T:0.138889     |
| chr28                                        | 11036374 2 | 36 | C:0.444444        | T:0.555556     |
| chr28                                        | 11036470 2 | 38 | G:0.552632        | A:0.447368     |
| chr28                                        | 11036491 2 | 40 | C:1 T:0           |                |
| chr28                                        | 11036637 2 | 38 | C:0.526316        | A:0.473684     |
| chr28                                        | 11036639 2 | 38 | T:0.605263        | G:0.394737     |
| chr28                                        | 11036705 2 | 38 | G:0.973684        | A:0.0263158    |
| chr28                                        | 11036874 2 | 36 | C:0.305556        | G:0.694444     |
| chr28                                        | 11037064 2 | 38 | G:0.447368        | A:0.552632     |
| chr28                                        | 11037211 2 | 38 | T:0.631579        | C:0.368421     |
| chr28                                        | 11037431 2 | 40 | G:0.9 A:0.1       |                |
| chr28                                        | 11037491 2 | 38 | CTTTCT:1          | C:0            |
| chr28                                        | 11037506 2 | 38 | T:0.684211        | C:0.315789     |
| chr28                                        | 11037508 2 | 38 | C:0.684211        | T:0.315789     |
| chr28                                        | 11037518 2 | 38 | C:0.684211        | T:0.315789     |
| chr28                                        | 11037522 4 | 40 | C:0.575 T:0.3     |                |
| CTTCTTTCTTTCTTTCTTTTTCTTTCTTTCT:0.025        |            |    |                   |                |
| CTTCTTTCTTTCTTTCTTTCTTTCTTTTTCTTTCTTTCTT:0.1 |            |    |                   |                |
| chr28                                        | 11037524 2 | 38 | T:0.684211        | C:0.315789     |
| chr28                                        | 11037538 2 | 40 | A:0.875 T:0.125   |                |
| chr28                                        | 11037815 2 | 36 | G:0.583333        | C:0.416667     |
| chr28                                        | 11037838 2 | 38 | C:0.973684        | T:0.0263158    |
| chr28                                        | 11037916 2 | 32 | A:0.96875         | T:0.03125      |
| chr28                                        | 11037997 2 | 38 | G:1 A:0           |                |
| chr28                                        | 11038002 2 | 38 | T:0.605263        | A:0.394737     |
| chr28                                        | 11038011 2 | 38 | T:0 C:1           |                |
| chr28                                        | 11038194 2 | 24 | G:1 A:0           |                |
| chr28                                        | 11038344 2 | 40 | ATTCT:1 A:0       |                |
| chr28                                        | 11038412 2 | 40 | C:0.975 T:0.025   |                |
| chr28                                        | 11038442 2 | 40 | G:1 A:0           |                |
| chr28                                        | 11038526 2 | 36 | A:1 G:0           |                |
| chr28                                        | 11038578 2 | 38 | G:0.973684        | A:0.0263158    |
| chr28                                        | 11038649 2 | 38 | A:1 G:0           |                |
| chr28                                        | 11038656 2 | 38 | A:1 C:0           |                |
| chr28                                        | 11038726 2 | 40 | G:1 A:0           |                |
| chr28                                        | 11038746 2 | 40 | CT:1 C:0          |                |
| chr28                                        | 11038767 2 | 38 | T:0.526316        | C:0.473684     |

|       |          |   |    |            |       |                          |
|-------|----------|---|----|------------|-------|--------------------------|
| chr28 | 11038955 | 2 | 34 | C:1        | T:0   |                          |
| chr28 | 11039000 | 2 | 32 | A:1        | T:0   |                          |
| chr28 | 11039001 | 2 | 32 | G:0.59375  |       | C:0.40625                |
| chr28 | 11039040 | 2 | 34 | A:1        | G:0   |                          |
| chr28 | 11039042 | 2 | 34 | A:1        | G:0   |                          |
| chr28 | 11039119 | 2 | 38 | T:1        | G:0   |                          |
| chr28 | 11039147 | 2 | 40 | G:1        | A:0   |                          |
| chr28 | 11039175 | 2 | 36 | G:0.972222 |       | A:0.0277778              |
| chr28 | 11039213 | 2 | 38 | G:0.947368 |       | A:0.0526316              |
| chr28 | 11039336 | 2 | 36 | C:1        | T:0   |                          |
| chr28 | 11039421 | 2 | 38 | G:0.973684 |       | A:0.0263158              |
| chr28 | 11039444 | 2 | 38 | A:0.973684 |       | G:0.0263158              |
| chr28 | 11039502 | 2 | 36 | G:0.972222 |       | GAAGTCCCCT:<br>0.0277778 |
| chr28 | 11039705 | 2 | 34 | C:1        | T:0   |                          |
| chr28 | 11039750 | 2 | 36 | G:1        | T:0   |                          |
| chr28 | 11039822 | 2 | 38 | G:0.947368 |       | A:0.0526316              |
| chr28 | 11039827 | 2 | 38 | G:0.421053 |       | C:0.578947               |
| chr28 | 11039882 | 2 | 40 | C:1        | T:0   |                          |
| chr28 | 11039902 | 2 | 38 | G:0.947368 |       | A:0.0526316              |
| chr28 | 11039922 | 2 | 38 | G:1        | A:0   |                          |
| chr28 | 11039935 | 2 | 36 | G:0.916667 |       | A:0.0833333              |
| chr28 | 11039942 | 2 | 38 | G:0.947368 |       | A:0.0526316              |
| chr28 | 11040024 | 2 | 34 | G:1        | A:0   |                          |
| chr28 | 11040055 | 2 | 36 | A:0.416667 |       | C:0.583333               |
| chr28 | 11040084 | 2 | 38 | C:0.973684 |       | A:0.0263158              |
| chr28 | 11040134 | 2 | 40 | T:0.4      | C:0.6 |                          |
| chr28 | 11040220 | 2 | 32 | A:1        | G:0   |                          |
| chr28 | 11040227 | 2 | 32 | G:1        | A:0   |                          |
| chr28 | 11040244 | 2 | 30 | A:1        | T:0   |                          |
| chr28 | 11040316 | 2 | 38 | A:0.973684 |       | G:0.0263158              |
| chr28 | 11040349 | 2 | 36 | C:0.972222 |       | T:0.0277778              |
| chr28 | 11040436 | 2 | 38 | T:0.552632 |       | C:0.447368               |
| chr28 | 11040688 | 2 | 34 | G:0.970588 |       | C:0.0294118              |
| chr28 | 11040769 | 2 | 22 | T:0.409091 |       | C:0.590909               |
| chr28 | 11040994 | 2 | 34 | T:0.529412 |       | C:0.470588               |
| chr28 | 11041095 | 2 | 30 | A:0.866667 |       | C:0.133333               |
| chr28 | 11041311 | 2 | 36 | G:0.972222 |       | A:0.0277778              |
| chr28 | 11041433 | 2 | 38 | C:0.447368 |       | T:0.552632               |
| chr28 | 11041590 | 2 | 40 | G:1        | A:0   |                          |
| chr28 | 11041594 | 2 | 40 | C:1        | T:0   |                          |
| chr28 | 11041634 | 2 | 34 | A:0.970588 |       | G:0.0294118              |
| chr28 | 11041754 | 2 | 36 | C:0.888889 |       | T:0.111111               |
| chr28 | 11041778 | 2 | 38 | T:0.473684 |       | C:0.526316               |
| chr28 | 11041959 | 2 | 34 | T:0.470588 |       | C:0.529412               |
| chr28 | 11042130 | 2 | 34 | C:0.882353 |       | A:0.117647               |
| chr28 | 11042173 | 2 | 38 | G:0.473684 |       | A:0.526316               |
| chr28 | 11042503 | 2 | 38 | C:1        | T:0   |                          |
| chr28 | 11042585 | 2 | 36 | T:0.916667 |       | A:0.0833333              |
| chr28 | 11042646 | 2 | 34 | T:0.911765 |       | A:0.0882353              |
| chr28 | 11042665 | 2 | 36 | A:0.916667 |       | G:0.0833333              |
| chr28 | 11042676 | 2 | 36 | A:0.916667 |       | G:0.0833333              |
| chr28 | 11042708 | 2 | 36 | T:0.361111 |       | C:0.638889               |
| chr28 | 11042715 | 2 | 36 | T:0.777778 |       | C:0.222222               |

|                                         |          |   |    |              |                   |
|-----------------------------------------|----------|---|----|--------------|-------------------|
| chr28                                   | 11042733 | 2 | 36 | C:0.805556   | T:0.194444        |
| chr28                                   | 11042792 | 2 | 36 | A:0.888889   | G:0.111111        |
| chr28                                   | 11042800 | 2 | 38 | C:0.342105   | CA:0.657895       |
| chr28                                   | 11042878 | 2 | 32 | C:0.875      | T:0.125           |
| chr28                                   | 11042885 | 2 | 32 | A:0.875      | G:0.125           |
| chr28                                   | 11042902 | 2 | 32 | A:0.875      | T:0.125           |
| chr28                                   | 11042903 | 2 | 32 | T:0.875      | C:0.125           |
| chr28                                   | 11042925 | 2 | 30 | G:0.866667   | GT:0.133333       |
| chr28                                   | 11043013 | 2 | 30 | C:0.933333   | T:0.066667        |
| chr28                                   | 11043039 | 2 | 38 | G:0.947368   | C:0.0526316       |
| chr28                                   | 11043040 | 2 | 38 | G:0.947368   | T:0.0526316       |
| chr28                                   | 11043061 | 2 | 38 | A:0.947368   | G:0.0526316       |
| chr28                                   | 11043217 | 2 | 36 | C:0.888889   | T:0.111111        |
| chr28                                   | 11043288 | 2 | 30 | T:0.5        | G:0.5             |
| chr28                                   | 11043364 | 2 | 36 | C:0.944444   | T:0.0555556       |
| chr28                                   | 11043430 | 2 | 36 | A:0.972222   | G:0.0277778       |
| chr28                                   | 11043466 | 2 | 36 | C:0.944444   | T:0.0555556       |
| chr28                                   | 11043573 | 2 | 34 | G:0.882353   | A:0.117647        |
| chr28                                   | 11043743 | 2 | 36 | T:0.805556   | C:0.194444        |
| chr28                                   | 11043747 | 2 | 36 | G:0.805556   | A:0.194444        |
| chr28                                   | 11043767 | 2 | 36 | C:0.888889   | A:0.111111        |
| chr28                                   | 11043779 | 2 | 36 | A:0.805556   | G:0.194444        |
| chr28                                   | 11043785 | 2 | 38 | G:0.947368   | A:0.0526316       |
| chr28                                   | 11043879 | 2 | 40 | C:0.85       | A:0.15            |
| chr28                                   | 11043889 | 2 | 40 | C:0.85       | G:0.15            |
| chr28                                   | 11043968 | 2 | 38 | C:0.973684   | A:0.0263158       |
| chr28                                   | 11044034 | 2 | 36 | C:0.805556   | T:0.194444        |
| chr28                                   | 11044071 | 2 | 38 | A:0.894737   | G:0.105263        |
| chr28                                   | 11044072 | 2 | 38 | T:0.894737   | C:0.105263        |
| chr28                                   | 11044133 | 2 | 38 | A:0.5        | ACCCAGGGGTAAG:0.5 |
| chr28                                   | 11044260 | 2 | 34 | G:0.441176   | C:0.558824        |
| chr28                                   | 11044291 | 2 | 30 | G:0.966667   | A:0.0333333       |
| chr28                                   | 11044351 | 2 | 38 | A:0.868421   | T:0.131579        |
| chr28                                   | 11044353 | 2 | 38 | C:0.973684   | T:0.0263158       |
| chr28                                   | 11044494 | 2 | 36 | G:0.861111   | A:0.138889        |
| chr28                                   | 11044534 | 2 | 36 | A:0.972222   | G:0.0277778       |
| chr28                                   | 11044630 | 2 | 36 | G:0.638889   | C:0.361111        |
| chr28                                   | 11044814 | 2 | 34 | CCT:0.970588 | C:0.0294118       |
| chr28                                   | 11044910 | 2 | 34 | G:1          | A:0               |
| chr28                                   | 11044915 | 2 | 34 | G:1          | T:0               |
| chr28                                   | 11044953 | 2 | 36 | T:0.611111   |                   |
| TGAGACTGAATTTTTTTTTTTTTTTTGGAA:0.388889 |          |   |    |              |                   |
| chr28                                   | 11044981 | 3 | 38 | G:0.947368   | GGT:0.0526316     |
| GGTGT:0                                 |          |   |    |              |                   |
| chr28                                   | 11044996 | 2 | 34 | GTA:0.823529 | G:0.176471        |
| chr28                                   | 11044998 | 2 | 34 | A:0.705882   | G:0.294118        |
| chr28                                   | 11045201 | 2 | 36 | C:1          | T:0               |
| chr28                                   | 11045229 | 2 | 36 | G:0.555556   | T:0.444444        |
| chr28                                   | 11045441 | 2 | 36 | G:0.583333   | C:0.416667        |
| chr28                                   | 11045483 | 2 | 36 | G:1          | A:0               |
| chr28                                   | 11045564 | 2 | 38 | T:0.842105   | C:0.157895        |
| chr28                                   | 11045598 | 2 | 40 | G:0.975      | A:0.025           |
| chr28                                   | 11045608 | 2 | 40 | A:0.45       | T:0.55            |
| chr28                                   | 11045649 | 2 | 40 | A:0.325      | C:0.675           |

|                                    |          |   |    |                     |          |               |
|------------------------------------|----------|---|----|---------------------|----------|---------------|
| chr28                              | 11045652 | 2 | 40 | C:0.5               | T:0.5    |               |
| chr28                              | 11045820 | 2 | 34 | C:0.529412          |          | T:0.470588    |
| chr28                              | 11045837 | 2 | 36 | G:1                 | A:0      |               |
| chr28                              | 11045846 | 2 | 34 | C:0.941176          |          | T:0.0588235   |
| chr28                              | 11045875 | 2 | 34 | T:0.441176          |          | C:0.558824    |
| chr28                              | 11045956 | 2 | 32 | G:0.9375            | A:0.0625 |               |
| chr28                              | 11046093 | 2 | 36 | A:0.527778          |          | T:0.472222    |
| chr28                              | 11046283 | 2 | 38 | C:0.947368          |          | G:0.0526316   |
| chr28                              | 11046314 | 3 | 36 | TTTTA:0.75          |          | T:0.111111    |
| TTTTATTTA:0.138889                 |          |   |    |                     |          |               |
| chr28                              | 11046366 | 2 | 38 | T:0.736842          |          |               |
| TTTTATTTATTTATTTATTTATTTA:0.263158 |          |   |    |                     |          |               |
| chr28                              | 11046734 | 2 | 40 | C:0.875             | T:0.125  |               |
| chr28                              | 11046745 | 2 | 40 | C:0.875             | T:0.125  |               |
| chr28                              | 11046806 | 2 | 38 | A:1                 | G:0      |               |
| chr28                              | 11046821 | 2 | 34 | G:0.705882          |          | A:0.294118    |
| chr28                              | 11047302 | 2 | 36 | C:0.5               | T:0.5    |               |
| chr28                              | 11047309 | 2 | 34 | C:0.970588          |          | T:0.0294118   |
| chr28                              | 11047492 | 2 | 38 | G:0.552632          |          | A:0.447368    |
| chr28                              | 11047710 | 2 | 36 | C:1                 | T:0      |               |
| chr28                              | 11047757 | 2 | 36 | A:0.305556          |          | G:0.694444    |
| chr28                              | 11047883 | 2 | 40 | G:0.35              | T:0.65   |               |
| chr28                              | 11047960 | 2 | 36 | A:0.916667          |          | T:0.0833333   |
| chr28                              | 11047997 | 2 | 34 | T:0.882353          |          | G:0.117647    |
| chr28                              | 11048566 | 2 | 36 | A:0.888889          |          | C:0.111111    |
| chr28                              | 11048570 | 2 | 36 | A:0.416667          |          | G:0.583333    |
| chr28                              | 11048798 | 2 | 34 | A:0.323529          |          | G:0.676471    |
| chr28                              | 11048852 | 2 | 40 | C:1                 | T:0      |               |
| chr28                              | 11048868 | 2 | 38 | C:0.394737          |          | A:0.605263    |
| chr28                              | 11048974 | 2 | 36 | C:0.527778          |          | A:0.472222    |
| chr28                              | 11049105 | 2 | 36 | C:1                 | T:0      |               |
| chr28                              | 11049165 | 2 | 36 | GA:0.388889         |          | G:0.611111    |
| chr28                              | 11049177 | 2 | 36 | A:0.388889          |          | G:0.611111    |
| chr28                              | 11049178 | 2 | 36 | A:0.388889          |          | T:0.611111    |
| chr28                              | 11049225 | 2 | 34 | C:1                 | T:0      |               |
| chr28                              | 11049282 | 2 | 36 | A:0.916667          |          | AG:0.0833333  |
| chr28                              | 11049309 | 3 | 40 | TAAAAACAAAAAC:0.525 |          | T:0.1         |
| TAAAAAC:0.375                      |          |   |    |                     |          |               |
| chr28                              | 11049314 | 2 | 40 | A:0.925             | G:0.075  |               |
| chr28                              | 11049392 | 2 | 36 | C:0.861111          |          | CCTT:0.138889 |
| chr28                              | 11049477 | 2 | 36 | C:0.777778          |          | G:0.222222    |
| chr28                              | 11049681 | 2 | 32 | T:1                 | C:0      |               |
| chr28                              | 11049791 | 2 | 36 | T:0.944444          |          | C:0.0555556   |
| chr28                              | 11049831 | 2 | 38 | T:0.789474          |          | C:0.210526    |
| chr28                              | 11049855 | 2 | 38 | T:0.789474          |          | C:0.210526    |
| chr28                              | 11050086 | 2 | 36 | A:0.805556          |          | C:0.194444    |
| chr28                              | 11050104 | 2 | 36 | C:0.805556          |          | T:0.194444    |
| chr28                              | 11050151 | 2 | 38 | T:0.815789          |          | C:0.184211    |
| chr28                              | 11050468 | 2 | 36 | A:0.888889          |          | G:0.111111    |
| chr28                              | 11050712 | 2 | 36 | G:1                 | A:0      |               |
| chr28                              | 11050994 | 2 | 34 | T:0.470588          |          | A:0.529412    |
| chr28                              | 11051063 | 2 | 34 | C:0.588235          |          | T:0.411765    |
| chr28                              | 11051264 | 2 | 38 | C:0.868421          |          | T:0.131579    |
| chr28                              | 11051347 | 2 | 36 | AT:1                | A:0      |               |



|       |          |   |    |                  |                |     |
|-------|----------|---|----|------------------|----------------|-----|
| chr28 | 11051551 | 2 | 34 | AC:1             | A:0            |     |
| chr28 | 11051910 | 2 | 20 | C:0.85           | CT:0.15        |     |
| chr28 | 11051955 | 2 | 32 | C:1              | T:0            |     |
| chr28 | 11052728 | 2 | 36 | C:1              | T:0            |     |
| chr28 | 11052738 | 2 | 36 | C:1              | T:0            |     |
| chr28 | 11052817 | 2 | 38 | T:1              | C:0            |     |
| chr28 | 11052838 | 2 | 40 | TTTTCTTTC:1      | T:0            |     |
| chr28 | 11052898 | 2 | 40 | CTTTCTTTCTTTCT:1 | C:0            |     |
| chr28 | 11052902 | 2 | 40 | CTTTCTTTCT:1     | C:0            |     |
| chr28 | 11052911 | 2 | 40 | T:0.975          | TTTC:0.025     |     |
| chr28 | 11053169 | 2 | 36 | C:0.916667       | T:0.0833333    |     |
| chr28 | 11053300 | 2 | 34 | G:1              | A:0            |     |
| chr28 | 11054904 | 2 | 36 | T:0.5            | C:0.5          |     |
| chr28 | 11055340 | 3 | 34 | CT:0.647059      | C:0.235294     |     |
|       |          |   |    | CTT:0.117647     |                |     |
| chr28 | 11057389 | 2 | 36 | A:0.583333       | G:0.416667     |     |
| chr28 | 11057902 | 2 | 38 | T:1              | C:0            |     |
| chr28 | 11058160 | 2 | 40 | C:1              | T:0            |     |
| chr28 | 11058630 | 4 | 36 | ATTT:0.388889    | A:0.0833333    |     |
|       |          |   |    | AT:0.416667      | ATT:0.111111   |     |
| chr28 | 11058660 | 2 | 36 | T:0.888889       | C:0.111111     |     |
| chr28 | 11059767 | 2 | 30 | T:0.433333       | TG:0.566667    |     |
| chr28 | 11060285 | 2 | 36 | C:1              | T:0            |     |
| chr28 | 11060514 | 2 | 38 | C:0.263158       | T:0.736842     |     |
| chr28 | 11060525 | 2 | 38 | C:0.921053       | CA:0.0789474   |     |
| chr28 | 11061225 | 2 | 36 | G:1              | A:0            |     |
| chr28 | 11062055 | 2 | 38 | T:0.894737       | A:0.105263     |     |
| chr28 | 11062158 | 2 | 38 | G:0.578947       | A:0.421053     |     |
| chr28 | 11062245 | 2 | 40 | T:0.5            | C:0.5          |     |
| chr28 | 11062255 | 2 | 40 | A:0.375          | C:0.625        |     |
| chr28 | 11062310 | 2 | 36 | G:0.527778       | A:0.472222     |     |
| chr28 | 11062417 | 2 | 38 | T:0.578947       | TA:0.421053    |     |
| chr28 | 11062567 | 2 | 38 | T:0.578947       | C:0.421053     |     |
| chr28 | 11062762 | 2 | 38 | C:0.605263       | T:0.394737     |     |
| chr28 | 11062783 | 2 | 38 | C:0.605263       | G:0.394737     |     |
| chr28 | 11062834 | 2 | 34 | A:0.441176       | T:0.558824     |     |
| chr28 | 11062874 | 2 | 36 | G:0.916667       | C:0.0833333    |     |
| chr28 | 11063078 | 2 | 38 | A:0              | T:1            |     |
| chr28 | 11063083 | 2 | 34 | T:0.588235       | G:0.411765     |     |
| chr28 | 11063122 | 2 | 38 | T:0.526316       | C:0.473684     |     |
| chr28 | 11063134 | 2 | 38 | T:0.526316       | C:0.473684     |     |
| chr28 | 11063207 | 2 | 34 | C:0.617647       | T:0.382353     |     |
| chr28 | 11063288 | 2 | 38 | T:0.578947       | A:0.421053     |     |
| chr28 | 11063324 | 2 | 40 | G:0.6            | A:0.4          |     |
| chr28 | 11063335 | 2 | 40 | C:0.725          | T:0.275        |     |
| chr28 | 11063349 | 2 | 40 | A:0.6            | G:0.4          |     |
| chr28 | 11063403 | 2 | 36 | A:0.611111       | G:0.388889     |     |
| chr28 | 11063568 | 2 | 38 | G:1              | A:0            |     |
| chr28 | 11063647 | 2 | 40 | A:0.4            | G:0.6          |     |
| chr28 | 11063753 | 2 | 38 | C:0.447368       | A:0.552632     |     |
| chr28 | 11063772 | 2 | 38 | TGTTA:0.447368   | T:0.552632     |     |
| chr28 | 11063953 | 2 | 36 | G:0.416667       | GTGTC:0.583333 |     |
| chr28 | 11064493 | 2 | 28 | T:0.464286       | C:0.535714     |     |
| chr28 | 11064863 | 3 | 32 | TAA:0.375        | T:0.5625       | TA: |

0.0625

|       |          |   |    |                              |     |              |  |
|-------|----------|---|----|------------------------------|-----|--------------|--|
| chr28 | 11064942 | 2 | 34 | T:1                          | A:0 |              |  |
| chr28 | 11065209 | 2 | 30 | A:0.933333                   |     | G:0.0666667  |  |
| chr28 | 11066114 | 2 | 26 | CT:0.307692                  |     | C:0.692308   |  |
| chr28 | 11066583 | 2 | 38 | A:0.631579                   |     | G:0.368421   |  |
| chr28 | 11066856 | 2 | 40 | A:0                          | T:1 |              |  |
| chr28 | 11066857 | 2 | 40 | A:0                          | G:1 |              |  |
| chr28 | 11066898 | 2 | 38 | A:0                          | G:1 |              |  |
| chr28 | 11066926 | 2 | 36 | A:0.555556                   |     | AC:0.444444  |  |
| chr28 | 11067087 | 2 | 36 | A:0.861111                   |     | G:0.138889   |  |
| chr28 | 11067397 | 2 | 36 | C:1                          | T:0 |              |  |
| chr28 | 11067465 | 2 | 36 | T:0                          | C:1 |              |  |
| chr28 | 11067559 | 2 | 36 | G:0.972222                   |     | T:0.0277778  |  |
| chr28 | 11067786 | 2 | 36 | T:0.416667                   |     | C:0.583333   |  |
| chr28 | 11068293 | 2 | 38 | A:0.526316                   |     | G:0.473684   |  |
| chr28 | 11068294 | 2 | 38 | G:0.342105                   |     | GGA:0.657895 |  |
| chr28 | 11068433 | 2 | 38 | T:0                          | G:1 |              |  |
| chr28 | 11068476 | 2 | 36 | CTG:0.638889                 |     | C:0.361111   |  |
| chr28 | 11068486 | 2 | 36 | T:0                          | C:1 |              |  |
| chr28 | 11068487 | 2 | 36 | T:0                          | C:1 |              |  |
| chr28 | 11068648 | 2 | 22 | AT:0.863636                  |     | A:0.136364   |  |
| chr28 | 11068658 | 2 | 22 | T:1                          | A:0 |              |  |
| chr28 | 11069264 | 2 | 36 | G:0.861111                   |     | C:0.138889   |  |
| chr28 | 11069542 | 2 | 34 | G:0.882353                   |     | C:0.117647   |  |
| chr28 | 11069630 | 2 | 38 | GCTGGCAAGTGCCTGGGGC:0.684211 |     |              |  |

G:0.315789

|       |          |   |    |            |            |            |     |
|-------|----------|---|----|------------|------------|------------|-----|
| chr28 | 11069722 | 2 | 38 | G:1        | A:0        |            |     |
| chr28 | 11070083 | 2 | 40 | AT:1       | A:0        |            |     |
| chr28 | 11070732 | 2 | 36 | C:1        | T:0        |            |     |
| chr28 | 11070951 | 2 | 32 | GT:0.71875 |            | G:0.28125  |     |
| chr28 | 11071678 | 2 | 36 | T:0.444444 |            | C:0.555556 |     |
| chr28 | 11071878 | 2 | 36 | C:1        | T:0        |            |     |
| chr28 | 11071976 | 2 | 38 | C:0.684211 |            | T:0.315789 |     |
| chr28 | 11072114 | 2 | 36 | A:0.833333 |            | T:0.166667 |     |
| chr28 | 11072137 | 2 | 36 | A:0.833333 |            | G:0.166667 |     |
| chr28 | 11072430 | 2 | 34 | T:0.558824 |            | C:0.441176 |     |
| chr28 | 11072492 | 3 | 28 | CTT:0.5    | C:0.142857 |            | CT: |

0.357143

|                     |          |   |    |                  |         |            |  |
|---------------------|----------|---|----|------------------|---------|------------|--|
| chr28               | 11072543 | 2 | 38 | GAC:1            | G:0     |            |  |
| chr28               | 11072547 | 3 | 40 | CACAG:0.775      |         | C:0        |  |
| CAGAGAGAGACAG:0.225 |          |   |    |                  |         |            |  |
| chr28               | 11072549 | 3 | 38 | CAGAGAG:0.184211 |         | C:0.394737 |  |
| GAGAGAG:0.421053    |          |   |    |                  |         |            |  |
| chr28               | 11072840 | 2 | 26 | G:0.269231       |         | T:0.730769 |  |
| chr28               | 11073413 | 2 | 40 | T:0.625          | A:0.375 |            |  |
| chr28               | 11073415 | 2 | 40 | G:0.625          | A:0.375 |            |  |
| chr28               | 11073659 | 2 | 34 | C:1              | T:0     |            |  |
| chr28               | 11073995 | 2 | 30 | GCTT:0.533333    |         | G:0.466667 |  |
| chr28               | 11073998 | 2 | 36 | T:1              | G:0     |            |  |
| chr28               | 11073999 | 2 | 36 | CTT:1            | C:0     |            |  |
| chr28               | 11074002 | 2 | 36 | T:0.805556       |         | C:0.194444 |  |
| chr28               | 11074091 | 2 | 34 | A:1              | G:0     |            |  |
| chr28               | 11074125 | 2 | 36 | A:0.638889       |         | G:0.361111 |  |
| chr28               | 11074183 | 2 | 36 | C:1              | T:0     |            |  |

|       |                 |   |    |                   |                        |              |
|-------|-----------------|---|----|-------------------|------------------------|--------------|
| chr28 | 11074258        | 2 | 40 | C:1               | T:0                    |              |
| chr28 | 11074371        | 2 | 38 | C:1               | CG:0                   |              |
| chr28 | 11074479        | 2 | 38 | A:0.921053        |                        | G:0.0789474  |
| chr28 | 11074654        | 2 | 40 | G:1               | A:0                    |              |
| chr28 | 11074671        | 2 | 40 | GGC:0.575         |                        | G:0.425      |
| chr28 | 11074800        | 2 | 36 | G:0.694444        |                        | A:0.305556   |
| chr28 | 11074844        | 2 | 36 | GGT:0.861111      |                        | G:0.138889   |
| chr28 | 11074860        | 2 | 36 | G:0.916667        |                        | A:0.0833333  |
| chr28 | 11074980        | 2 | 40 | G:1               | C:0                    |              |
| chr28 | 11075230        | 2 | 34 | A:1               | G:0                    |              |
| chr28 | 11075318        | 2 | 32 | A:1               | G:0                    |              |
| chr28 | 11075428        | 2 | 32 | C:1               | T:0                    |              |
| chr28 | 11075439        | 2 | 30 | C:1               | G:0                    |              |
| chr28 | 11075530        | 2 | 38 | C:0.973684        |                        | T:0.0263158  |
| chr28 | 11075544        | 2 | 38 | ATAAGT:0.973684   |                        | A:0.0263158  |
| chr28 | 11075654        | 2 | 36 | A:0.888889        |                        | AT:0.111111  |
| chr28 | 11075655        | 2 | 36 | A:0.888889        |                        | T:0.111111   |
| chr28 | 11075670        | 2 | 34 | C:0.529412        |                        | T:0.470588   |
| chr28 | 11075741        | 3 | 38 | TTTATTTA:0.894737 |                        | TTTTA:       |
|       | 0.0789474       |   |    |                   |                        | T:0.0263158  |
| chr28 | 11075748        | 3 | 38 | ATTTTT:0.473684   |                        | A:0.0789474  |
|       | ATTTTT:0.447368 |   |    |                   |                        |              |
| chr28 | 11075791        | 2 | 32 | A:1               | C:0                    |              |
| chr28 | 11075888        | 2 | 36 | G:0.944444        |                        | C:0.0555556  |
| chr28 | 11075926        | 2 | 36 | A:0.472222        |                        | G:0.527778   |
| chr28 | 11075938        | 2 | 36 | T:1               | G:0                    |              |
| chr28 | 11075981        | 2 | 30 | T:0.966667        |                        | TC:0.0333333 |
| chr28 | 11076189        | 2 | 32 | AT:1              | A:0                    |              |
| chr28 | 11076227        | 2 | 30 | G:1               | T:0                    |              |
| chr28 | 11076236        | 2 | 30 | T:1               | TG:0                   |              |
| chr28 | 11076317        | 2 | 34 | G:1               | C:0                    |              |
| chr28 | 11076385        | 2 | 36 | G:1               | A:0                    |              |
| chr28 | 11076630        | 2 | 34 | T:1               | C:0                    |              |
| chr28 | 11076714        | 2 | 40 | G:1               | A:0                    |              |
| chr28 | 11076770        | 2 | 38 | G:1               | A:0                    |              |
| chr28 | 11076911        | 2 | 38 | G:1               | A:0                    |              |
| chr28 | 11076921        | 2 | 38 | T:1               | A:0                    |              |
| chr28 | 11076937        | 2 | 36 | C:1               | T:0                    |              |
| chr28 | 11076994        | 2 | 36 | GCACTGC:0.972222  |                        | G:0.0277778  |
| chr28 | 11077054        | 2 | 38 | C:0.894737        |                        | A:0.105263   |
| chr28 | 11077133        | 2 | 36 | C:0.944444        |                        | T:0.0555556  |
| chr28 | 11077297        | 2 | 36 | C:0.805556        |                        | T:0.194444   |
| chr28 | 11077318        | 2 | 38 | A:0.342105        |                        | G:0.657895   |
| chr28 | 11077319        | 2 | 38 | T:1               | C:0                    |              |
| chr28 | 11077447        | 2 | 38 | T:1               | TCCAGGCACAGAGCTACCAA:0 |              |
| chr28 | 11077561        | 2 | 32 | C:1               | T:0                    |              |
| chr28 | 11077680        | 2 | 34 | CTT:1             | C:0                    |              |
| chr28 | 11077780        | 2 | 34 | G:1               | A:0                    |              |
| chr28 | 11077863        | 2 | 36 | C:0.555556        |                        | A:0.444444   |
| chr28 | 11077910        | 2 | 40 | G:1               | C:0                    |              |
| chr28 | 11078064        | 2 | 38 | GA:0.657895       |                        | G:0.342105   |
| chr28 | 11078201        | 2 | 36 | T:0.527778        |                        | C:0.472222   |
| chr28 | 11078236        | 2 | 38 | A:0.631579        |                        | G:0.368421   |
| chr28 | 11078310        | 2 | 34 | A:0.470588        |                        | G:0.529412   |

|       |                |    |                    |                   |
|-------|----------------|----|--------------------|-------------------|
| chr28 | 11078317 2     | 34 | A:0.647059         | C:0.352941        |
| chr28 | 11078404 2     | 38 | C:0 CG:1           |                   |
| chr28 | 11078422 2     | 36 | C:0.722222         | CGGGCTGCTGTG:     |
|       | 0.277778       |    |                    |                   |
| chr28 | 11078501 2     | 28 | A:0.642857         | C:0.357143        |
| chr28 | 11078804 2     | 36 | T:0.527778         | C:0.472222        |
| chr28 | 11078812 2     | 38 | CGGAGGGAGGGTGA     | CTGGCCCG:0.631579 |
|       | C:0.368421     |    |                    |                   |
| chr28 | 11078843 2     | 38 | A:0.0263158        | G:0.973684        |
| chr28 | 11078939 2     | 34 | C:0.941176         | T:0.0588235       |
| chr28 | 11078991 2     | 34 | A:0.970588         | G:0.0294118       |
| chr28 | 11079200 2     | 38 | A:0.921053         | G:0.0789474       |
| chr28 | 11079493 2     | 40 | A:0.925            |                   |
|       | AATGAGTGC      |    |                    |                   |
|       | GTGTCATT       |    |                    |                   |
|       | CAGTGTAT:0.075 |    |                    |                   |
| chr28 | 11079599 2     | 34 | C:0.970588         | T:0.0294118       |
| chr28 | 11079620 2     | 32 | G:0.65625          | A:0.34375         |
| chr28 | 11079735 2     | 38 | C:0.5 T:0.5        |                   |
| chr28 | 11079947 2     | 40 | T:0.95 C:0.05      |                   |
| chr28 | 11080056 2     | 38 | G:1 C:0            |                   |
| chr28 | 11080401 2     | 30 | A:1 G:0            |                   |
| chr28 | 11080539 2     | 38 | ACAG:1 A:0         |                   |
| chr28 | 11080543 2     | 38 | G:1 GTGATGA:0      |                   |
| chr28 | 11080749 2     | 34 | C:0.529412         | T:0.470588        |
| chr28 | 11080756 2     | 36 | T:0.916667         | C:0.0833333       |
| chr28 | 11080853 2     | 38 | TG:1 T:0           |                   |
| chr28 | 11080976 2     | 36 | T:0.944444         | G:0.0555556       |
| chr28 | 11081239 2     | 34 | A:0.941176         | G:0.0588235       |
| chr28 | 11081330 2     | 38 | CTG:0.894737       | C:0.105263        |
| chr28 | 11081483 2     | 36 | A:0.916667         | AC:0.0833333      |
| chr28 | 11081494 2     | 36 | T:0.444444         | G:0.555556        |
| chr28 | 11081540 2     | 34 | C:0.970588         | T:0.0294118       |
| chr28 | 11081649 2     | 38 | C:1 T:0            |                   |
| chr28 | 11081757 2     | 34 | C:0.235294         | G:0.764706        |
| chr28 | 11081919 2     | 34 | C:0.941176         | T:0.0588235       |
| chr28 | 11081959 2     | 40 | T:0.325 C:0.675    |                   |
| chr28 | 11082040 2     | 40 | T:0.925 C:0.075    |                   |
| chr28 | 11082136 2     | 38 | A:0.973684         | C:0.0263158       |
| chr28 | 11082244 2     | 38 | C:0 T:1            |                   |
| chr28 | 11082388 2     | 38 | C:0 G:1            |                   |
| chr28 | 11082442 2     | 38 | C:0 T:1            |                   |
| chr28 | 11082920 2     | 36 | G:0.972222         | A:0.0277778       |
| chr28 | 11083144 2     | 38 | T:0.921053         | C:0.0789474       |
| chr28 | 11083204 3     | 40 | C:0.875 G:0.05     | T:0.075           |
| chr28 | 11083338 2     | 36 | C:0.638889         | CTG:0.361111      |
| chr28 | 11083603 2     | 32 | A:0.90625          | T:0.09375         |
| chr28 | 11083870 2     | 36 | C:0.472222         | T:0.527778        |
| chr28 | 11083873 2     | 34 | C:1 T:0            |                   |
| chr28 | 11083874 2     | 34 | G:1 A:0            |                   |
| chr28 | 11083953 2     | 36 | C:1 T:0            |                   |
| chr28 | 11084408 2     | 34 | C:0.588235         | T:0.411765        |
| chr28 | 11084893 2     | 16 | T:0.9375 TA:0.0625 |                   |
| chr28 | 11084944 2     | 38 | GAGAGAGAGAGAC      | GC GCC:0.631579   |
|       | G:0.368421     |    |                    |                   |
| chr28 | 11085077 2     | 34 | G:0.441176         | A:0.558824        |

|          |          |   |    |                |                  |
|----------|----------|---|----|----------------|------------------|
| chr28    | 11085221 | 2 | 36 | T:0.444444     | C:0.555556       |
| chr28    | 11085223 | 2 | 36 | C:0.916667     | A:0.0833333      |
| chr28    | 11085484 | 2 | 36 | G:1            | A:0              |
| chr28    | 11085598 | 2 | 36 | GT:1           | G:0              |
| chr28    | 11085630 | 2 | 38 | A:1            | G:0              |
| chr28    | 11085654 | 2 | 38 | A:0.315789     | AGTGAAGTACTGTGG: |
| 0.684211 |          |   |    |                |                  |
| chr28    | 11085939 | 2 | 34 | T:1            | C:0              |
| chr28    | 11086111 | 2 | 38 | G:1            | A:0              |
| chr28    | 11086130 | 2 | 36 | C:0.611111     | CG:0.388889      |
| chr28    | 11086334 | 2 | 36 | C:0.472222     | A:0.527778       |
| chr28    | 11086385 | 2 | 36 | G:0.916667     | A:0.0833333      |
| chr28    | 11086761 | 2 | 38 | C:0.552632     | T:0.447368       |
| chr28    | 11086773 | 2 | 34 | T:0.441176     | C:0.558824       |
| chr28    | 11086780 | 2 | 38 | C:1            | T:0              |
| chr28    | 11087050 | 2 | 36 | T:0.583333     | C:0.416667       |
| chr28    | 11087121 | 2 | 36 | G:1            | A:0              |
| chr28    | 11087143 | 2 | 40 | T:1            | C:0              |
| chr28    | 11087191 | 2 | 34 | C:1            | CT:0             |
| chr28    | 11087197 | 3 | 34 | A:0.176471     | G:0.823529       |
| C:0      |          |   |    |                |                  |
| chr28    | 11087228 | 2 | 32 | G:0.90625      | T:0.09375        |
| chr28    | 11087249 | 2 | 30 | T:0            | C:1              |
| chr28    | 11087269 | 3 | 34 | A:0.147059     | G:0.852941       |
| C:0      |          |   |    |                |                  |
| chr28    | 11087277 | 2 | 34 | C:1            | T:0              |
| chr28    | 11087278 | 2 | 34 | G:0.911765     | A:0.0882353      |
| chr28    | 11087407 | 2 | 30 | C:1            | T:0              |
| chr28    | 11087609 | 2 | 38 | C:0.921053     | T:0.0789474      |
| chr28    | 11087639 | 2 | 40 | C:0.925        | T:0.075          |
| chr28    | 11087712 | 2 | 38 | C:1            | A:0              |
| chr28    | 11088107 | 2 | 36 | T:1            | A:0              |
| chr28    | 11088113 | 2 | 36 | A:0.888889     | G:0.111111       |
| chr28    | 11088146 | 2 | 38 | C:0.921053     | T:0.0789474      |
| chr28    | 11088216 | 2 | 36 | T:0.5          | A:0.5            |
| chr28    | 11088303 | 2 | 40 | T:1            | A:0              |
| chr28    | 11088311 | 2 | 40 | T:1            | A:0              |
| chr28    | 11088406 | 2 | 36 | G:0.888889     | T:0.111111       |
| chr28    | 11088443 | 2 | 36 | C:1            | T:0              |
| chr28    | 11088646 | 2 | 36 | G:1            | C:0              |
| chr28    | 11088889 | 2 | 36 | C:0.0833333    | G:0.916667       |
| chr28    | 11088961 | 2 | 32 | G:0.09375      | T:0.90625        |
| chr28    | 11089447 | 2 | 32 | T:0.875        | TG:0.125         |
| chr28    | 11089675 | 2 | 30 | T:1            | C:0              |
| chr28    | 11089868 | 2 | 34 | ATGAT:0.911765 | A:0.0882353      |
| chr28    | 11090312 | 2 | 40 | C:0.9          | T:0.1            |
| chr28    | 11090385 | 2 | 34 | C:0.470588     | T:0.529412       |
| chr28    | 11090391 | 2 | 36 | G:1            | A:0              |
| chr28    | 11090401 | 2 | 36 | T:1            | C:0              |
| chr28    | 11090601 | 2 | 38 | T:0.894737     | C:0.105263       |
| chr28    | 11090646 | 2 | 36 | G:0.888889     | A:0.111111       |
| chr28    | 11090851 | 2 | 40 | T:1            | C:0              |
| chr28    | 11091691 | 2 | 36 | T:1            | C:0              |
| chr28    | 11091957 | 2 | 36 | A:0.472222     | T:0.527778       |

|              |          |                |    |                            |          |             |
|--------------|----------|----------------|----|----------------------------|----------|-------------|
| chr28        | 11091964 | 2              | 36 | C:1                        | T:0      |             |
| chr28        | 11091986 | 2              | 36 | C:0                        | T:1      |             |
| chr28        | 11092072 | 2              | 40 | G:1                        | A:0      |             |
| chr28        | 11092484 | 2              | 38 | G:0.342105                 |          | A:0.657895  |
| chr28        | 11092673 | 2              | 34 | C:1                        | G:0      |             |
| chr28        | 11092734 | 2              | 36 | G:0.388889                 |          | A:0.611111  |
| chr28        | 11092759 | 2              | 36 | A:0.388889                 |          | G:0.611111  |
| chr28        | 11092773 | 4              | 38 | CT:0.657895                |          | C:0.0263158 |
| CTT:0.236842 |          | CTTT:0.0789474 |    |                            |          |             |
| chr28        | 11092798 | 2              | 30 | A:0.433333                 |          | G:0.566667  |
| chr28        | 11093193 | 2              | 26 | T:1                        | C:0      |             |
| chr28        | 11093450 | 2              | 36 | C:1                        | T:0      |             |
| chr28        | 11093451 | 2              | 36 | G:1                        | A:0      |             |
| chr28        | 11093600 | 2              | 36 | T:0.5                      | C:0.5    |             |
| chr28        | 11093730 | 2              | 38 | C:1                        | T:0      |             |
| chr28        | 11093772 | 2              | 36 | A:0.388889                 |          | C:0.611111  |
| chr28        | 11094006 | 2              | 38 | T:0                        | C:1      |             |
| chr28        | 11094058 | 2              | 34 | C:0.470588                 |          | T:0.529412  |
| chr28        | 11094197 | 2              | 38 | A:0.368421                 |          | C:0.631579  |
| chr28        | 11094562 | 2              | 36 | T:0.361111                 |          | C:0.638889  |
| chr28        | 11094827 | 2              | 32 | T:0                        | C:1      |             |
| chr28        | 11094880 | 2              | 36 | G:1                        | C:0      |             |
| chr28        | 11095001 | 2              | 16 | CTA:0.375                  |          | C:0.625     |
| chr28        | 11095046 | 2              | 34 | GAGGT:0.176471             |          | G:0.823529  |
| chr28        | 11095051 | 2              | 34 | CATCACTGTTTCCTCGA:0.176471 |          |             |
| C:0.823529   |          |                |    |                            |          |             |
| chr28        | 11095265 | 2              | 30 | A:0                        | G:1      |             |
| chr28        | 11095422 | 2              | 30 | C:0.6                      | T:0.4    |             |
| chr28        | 11095450 | 2              | 22 | T:0.363636                 |          | C:0.636364  |
| chr28        | 11095473 | 2              | 16 | G:0.375                    | GC:0.625 |             |
| chr28        | 11095587 | 2              | 34 | GC:0.529412                |          | G:0.470588  |
| chr28        | 11095611 | 2              | 34 | T:1                        | C:0      |             |
| chr28        | 11095636 | 2              | 30 | T:0                        | TC:1     |             |
| chr28        | 11095641 | 2              | 30 | T:0                        | C:1      |             |
| chr28        | 11095713 | 2              | 30 | G:0.5                      | A:0.5    |             |
| chr28        | 11095747 | 2              | 32 | C:0.5625                   | T:0.4375 |             |
| chr28        | 11096086 | 2              | 38 | T:0.368421                 |          | TC:0.631579 |
| chr28        | 11096095 | 2              | 38 | T:0.368421                 |          | C:0.631579  |
| chr28        | 11096168 | 2              | 30 | T:0.266667                 |          | C:0.733333  |
| chr28        | 11096230 | 2              | 40 | C:0.55                     | G:0.45   |             |
| chr28        | 11096387 | 2              | 36 | T:0.444444                 |          | C:0.555556  |
| chr28        | 11096613 | 2              | 38 | C:0.5                      | A:0.5    |             |
| chr28        | 11096615 | 2              | 38 | C:0.5                      | T:0.5    |             |
| chr28        | 11096744 | 2              | 32 | C:0.9375                   | T:0.0625 |             |
| chr28        | 11096805 | 2              | 26 | G:1                        | A:0      |             |
| chr28        | 11096887 | 2              | 36 | C:0.305556                 |          | T:0.694444  |
| chr28        | 11096899 | 2              | 36 | TTATAA:0.444444            |          | T:0.555556  |
| chr28        | 11097168 | 2              | 38 | C:0.631579                 |          | T:0.368421  |
| chr28        | 11097174 | 2              | 38 | T:0.421053                 |          | C:0.578947  |
| chr28        | 11097222 | 2              | 36 | G:0.972222                 |          | T:0.027778  |
| chr28        | 11097772 | 2              | 36 | T:0                        | C:1      |             |
| chr28        | 11097881 | 2              | 34 | G:1                        | T:0      |             |
| chr28        | 11098026 | 2              | 32 | A:1                        | C:0      |             |
| chr28        | 11098304 | 2              | 32 | G:1                        | T:0      |             |

|       |            |    |              |           |                |
|-------|------------|----|--------------|-----------|----------------|
| chr28 | 11098527 2 | 38 | A:1          | G:0       |                |
| chr28 | 11098587 2 | 32 | A:0          | G:1       |                |
| chr28 | 11098782 2 | 34 | C:0.941176   |           | CCTT:0.0588235 |
| chr28 | 11099365 2 | 36 | G:0.555556   |           | C:0.444444     |
| chr28 | 11099488 2 | 30 | GA:0.0333333 |           | G:0.966667     |
| chr28 | 11099513 2 | 34 | G:1          | A:0       |                |
| chr28 | 11099641 2 | 32 | G:1          | A:0       |                |
| chr28 | 11099763 2 | 34 | T:1          | C:0       |                |
| chr28 | 11099799 2 | 32 | A:0.375      | G:0.625   |                |
| chr28 | 11100187 2 | 36 | T:1          | C:0       |                |
| chr28 | 11100307 2 | 34 | T:0.235294   |           | C:0.764706     |
| chr28 | 11100470 2 | 32 | T:1          | C:0       |                |
| chr28 | 11100601 2 | 34 | G:1          | A:0       |                |
| chr28 | 11100610 2 | 36 | G:1          | C:0       |                |
| chr28 | 11100623 2 | 38 | G:1          | A:0       |                |
| chr28 | 11100882 2 | 40 | C:0.425      | T:0.575   |                |
| chr28 | 11101093 2 | 38 | T:0.368421   |           | C:0.631579     |
| chr28 | 11101147 2 | 36 | C:1          | T:0       |                |
| chr28 | 11101263 2 | 34 | T:1          | TA:0      |                |
| chr28 | 11101367 2 | 34 | G:0.441176   |           | C:0.558824     |
| chr28 | 11101835 2 | 38 | C:0.5        | T:0.5     |                |
| chr28 | 11101862 2 | 36 | T:0          | TC:1      |                |
| chr28 | 11101892 2 | 32 | A:0.9375     | AC:0.0625 |                |
| chr28 | 11102125 2 | 36 | C:0.472222   |           | T:0.527778     |
| chr28 | 11102168 2 | 34 | C:0.735294   |           | T:0.264706     |
| chr28 | 11102205 2 | 34 | C:0.882353   |           | T:0.117647     |
| chr28 | 11102340 2 | 32 | G:0.4375     | A:0.5625  |                |
| chr28 | 11102341 2 | 32 | C:0.625      | T:0.375   |                |
| chr28 | 11102815 2 | 38 | C:0.789474   |           | T:0.210526     |
| chr28 | 11103125 2 | 36 | G:0.416667   |           | A:0.583333     |
| chr28 | 11103373 2 | 38 | C:1          | G:0       |                |
| chr28 | 11103479 2 | 40 | C:0          | T:1       |                |
| chr28 | 11103607 2 | 38 | G:0.447368   |           | A:0.552632     |
| chr28 | 11103837 2 | 38 | A:0.736842   |           | AT:0.263158    |
| chr28 | 11104180 2 | 38 | G:0          | A:1       |                |
| chr28 | 11104411 2 | 34 | G:0          | A:1       |                |
| chr28 | 11104762 2 | 34 | A:1          | G:0       |                |
| chr28 | 11104855 2 | 40 | TTGTC:0.625  |           | T:0.375        |
| chr28 | 11105005 2 | 36 | C:0.361111   |           | A:0.638889     |
| chr28 | 11105189 2 | 38 | T:0          | C:1       |                |
| chr28 | 11105214 2 | 38 | G:1          | A:0       |                |
| chr28 | 11105290 2 | 38 | C:0.947368   |           | A:0.0526316    |
| chr28 | 11105354 2 | 38 | T:0.421053   |           | G:0.578947     |
| chr28 | 11105413 2 | 38 | T:0.473684   |           | A:0.526316     |
| chr28 | 11105483 2 | 38 | C:1          | T:0       |                |
| chr28 | 11105707 2 | 38 | C:1          | T:0       |                |
| chr28 | 11105854 2 | 34 | A:0.0294118  |           | AT:0.970588    |
| chr28 | 11105936 2 | 36 | A:0          | C:1       |                |
| chr28 | 11106029 2 | 28 | C:0          | T:1       |                |
| chr28 | 11106299 2 | 40 | C:0.05       | T:0.95    |                |
| chr28 | 11106656 2 | 20 | G:0.1        | C:0.9     |                |
| chr28 | 11106834 2 | 36 | GA:1         | G:0       |                |
| chr28 | 11106854 2 | 32 | GGAA:1       | G:0       |                |
| chr28 | 11107247 2 | 34 | G:0.970588   |           | T:0.0294118    |

|                                  |            |    |             |                |
|----------------------------------|------------|----|-------------|----------------|
| chr28                            | 11107330 2 | 38 | C:0.131579  | G:0.868421     |
| chr28                            | 11107343 2 | 36 | A:1         | AG:0           |
| chr28                            | 11107350 2 | 36 | A:0.138889  | C:0.861111     |
| chr28                            | 11108437 2 | 34 | A:1         | G:0            |
| chr28                            | 11109076 2 | 38 | C:1         | T:0            |
| chr28                            | 11109354 2 | 40 | G:0.6       | GCCCTCTGT:0.4  |
| chr28                            | 11109367 2 | 40 | C:0.45      | CTGTCCCTG:0.55 |
| chr28                            | 11109508 2 | 38 | C:1         | G:0            |
| chr28                            | 11109652 2 | 32 | C:0         | T:1            |
| chr28                            | 11109667 2 | 36 | G:1         | A:0            |
| chr28                            | 11109813 2 | 30 | G:1         | T:0            |
| chr28                            | 11110093 2 | 36 | C:0.0277778 | A:0.972222     |
| chr28                            | 11110396 2 | 40 | C:0.925     | T:0.075        |
| chr28                            | 11110523 2 | 40 | T:0.875     | G:0.125        |
| chr28                            | 11110596 2 | 40 | A:1         | C:0            |
| chr28                            | 11110844 2 | 38 | G:1         | A:0            |
| chr28                            | 11111059 2 | 32 | G:1         | A:0            |
| chr28                            | 11111267 2 | 36 | T:1         | C:0            |
| chr28                            | 11111378 2 | 40 | T:1         |                |
| TGCCAGTGGTCCCTGGGCCCTCTTAGAGAA:0 |            |    |             |                |
| chr28                            | 11111411 2 | 40 | C:0.925     | T:0.075        |
| chr28                            | 11111442 2 | 40 | C:0.925     | T:0.075        |
| chr28                            | 11111522 2 | 34 | G:1         | C:0            |
| chr28                            | 11111683 2 | 38 | G:1         | A:0            |
| chr28                            | 11111688 2 | 38 | A:1         | ACT:0          |
| chr28                            | 11111767 2 | 40 | C:1         | CTGCCCATTT:0   |
| chr28                            | 11111835 2 | 36 | A:1         | G:0            |
| chr28                            | 11111999 2 | 36 | G:1         | A:0            |
| chr28                            | 11112156 2 | 36 | G:0.888889  | GGT:0.111111   |
| chr28                            | 11112381 2 | 30 | G:1         | C:0            |
| chr28                            | 11112479 2 | 38 | T:1         | A:0            |
| chr28                            | 11112502 2 | 38 | T:1         | C:0            |
| chr28                            | 11112579 2 | 36 | A:1         | G:0            |
| chr28                            | 11112915 2 | 34 | T:1         | C:0            |
| chr28                            | 11112950 2 | 32 | A:0.96875   | C:0.03125      |
| chr28                            | 11113095 2 | 40 | C:1         | A:0            |
| chr28                            | 11113144 2 | 38 | C:1         | G:0            |
| chr28                            | 11113246 2 | 38 | A:0.368421  | G:0.631579     |
| chr28                            | 11113345 2 | 36 | CAGT:1      | C:0            |
| chr28                            | 11113470 2 | 38 | C:1         | T:0            |
| chr28                            | 11113826 2 | 40 | G:1         | C:0            |
| chr28                            | 11113919 2 | 40 | G:0.925     | T:0.075        |
| chr28                            | 11113945 2 | 40 | G:0.925     | A:0.075        |
| chr28                            | 11114003 2 | 38 | C:0.973684  | A:0.0263158    |
| chr28                            | 11114052 2 | 36 | CA:1        | C:0            |
| chr28                            | 11114214 2 | 38 | T:0.368421  | TG:0.631579    |
| chr28                            | 11114250 2 | 38 | G:0.947368  | GGGCATCA:      |
| 0.0526316                        |            |    |             |                |
| chr28                            | 11114310 2 | 36 | C:1         | T:0            |
| chr28                            | 11114488 2 | 34 | G:0         | A:1            |
| chr28                            | 11114644 2 | 36 | G:1         | C:0            |
| chr28                            | 11114680 2 | 36 | C:0.583333  | A:0.416667     |
| chr28                            | 11114745 2 | 36 | C:1         | G:0            |
| chr28                            | 11114952 2 | 38 | T:0.684211  | G:0.315789     |



|                                      |            |    |                            |             |
|--------------------------------------|------------|----|----------------------------|-------------|
| chr28                                | 11115466 2 | 40 | GGTCATCACTCTTTT:1          | G:0         |
| chr28                                | 11116483 2 | 36 | G:1 A:0                    |             |
| chr28                                | 11116748 2 | 36 | G:0.944444                 | A:0.0555556 |
| chr28                                | 11116868 2 | 40 | C:1 T:0                    |             |
| chr28                                | 11117470 2 | 36 | C:1 T:0                    |             |
| chr28                                | 11117661 2 | 34 | C:1 T:0                    |             |
| chr28                                | 11117865 2 | 36 | C:0 G:1                    |             |
| chr28                                | 11117881 2 | 36 | T:1 C:0                    |             |
| chr28                                | 11117882 2 | 36 | G:0.944444                 | A:0.0555556 |
| chr28                                | 11117970 2 | 38 | G:0.131579                 | A:0.868421  |
| chr28                                | 11118123 2 | 38 | G:1 T:0                    |             |
| chr28                                | 11118577 2 | 34 | G:1 A:0                    |             |
| chr28                                | 11119076 3 | 40 | G:0.95 GTGTATATATATA:0     |             |
| GTGTATATATATATATATATATATATATATA:0.05 |            |    |                            |             |
| chr28                                | 11119439 2 | 36 | TA:0.0833333               | T:0.916667  |
| chr28                                | 11119460 2 | 36 | C:1 T:0                    |             |
| chr28                                | 11119719 2 | 38 | AGCCGC:0.0526316           | A:0.947368  |
| chr28                                | 11119758 2 | 38 | C:1 T:0                    |             |
| chr28                                | 11119763 2 | 38 | G:0.0263158                | A:0.973684  |
| chr28                                | 11119851 2 | 36 | A:1 G:0                    |             |
| chr28                                | 11119940 2 | 32 | G:1 A:0                    |             |
| chr28                                | 11119970 2 | 32 | G:0.90625                  | A:0.09375   |
| chr28                                | 11120461 2 | 32 | C:0.53125                  | T:0.46875   |
| chr28                                | 11120469 2 | 34 | T:0 G:1                    |             |
| chr28                                | 11120511 2 | 38 | C:0.605263                 | T:0.394737  |
| chr28                                | 11120515 2 | 38 | A:0 G:1                    |             |
| chr28                                | 11120552 2 | 38 | A:0 G:1                    |             |
| chr28                                | 11120557 2 | 38 | G:1 A:0                    |             |
| chr28                                | 11120715 2 | 34 | GCCTC:0.941176             | G:0.0588235 |
| chr28                                | 11120719 2 | 34 | C:0.0882353                | G:0.911765  |
| chr28                                | 11121395 2 | 40 | C:1 T:0                    |             |
| chr28                                | 11122447 2 | 38 | G:1 A:0                    |             |
| chr28                                | 11122803 2 | 40 | G:1 A:0                    |             |
| chr28                                | 11122824 2 | 40 | C:0.925 T:0.075            |             |
| chr28                                | 11122877 2 | 40 | G:0.05 A:0.95              |             |
| chr28                                | 11122960 2 | 40 | A:1 C:0                    |             |
| chr28                                | 11123223 2 | 16 | AGTGT:0.75                 | A:0.25      |
| chr28                                | 11123436 2 | 26 | C:0.0769231                | T:0.923077  |
| chr28                                | 11123464 3 | 16 | G:0.25 GC:0.25 GCC:0.5     |             |
| chr28                                | 11123682 2 | 30 | G:1 A:0                    |             |
| chr28                                | 11123715 2 | 28 | T:1 TAG:0                  |             |
| chr28                                | 11123739 2 | 30 | A:0.9 G:0.1                |             |
| chr28                                | 11123933 2 | 40 | GTCAACCATCCAATGCA:0.925    | G:0.075     |
| chr28                                | 11124034 2 | 40 | C:1 T:0                    |             |
| chr28                                | 11124145 2 | 32 | T:0.875 C:0.125            |             |
| chr28                                | 11124619 2 | 36 | C:1 T:0                    |             |
| chr28                                | 11124663 2 | 38 | AGGTGTCGCTATCTGCT:0.947368 |             |
| A:0.0526316                          |            |    |                            |             |
| chr28                                | 11124729 2 | 36 | T:0.888889                 | C:0.111111  |
| chr28                                | 11124852 2 | 40 | G:1 C:0                    |             |
| chr28                                | 11124920 2 | 36 | G:0.972222                 | A:0.0277778 |
| chr28                                | 11125055 2 | 36 | G:1 A:0                    |             |
| chr28                                | 11125076 2 | 32 | T:0 C:1                    |             |
| chr28                                | 11125082 2 | 32 | A:0.59375                  | G:0.40625   |

|       |          |   |    |                 |                |
|-------|----------|---|----|-----------------|----------------|
| chr28 | 11125296 | 2 | 38 | G:0.921053      | C:0.0789474    |
| chr28 | 11125301 | 2 | 38 | A:1 AG:0        |                |
| chr28 | 11126251 | 2 | 38 | G:0.0263158     | A:0.973684     |
| chr28 | 11126751 | 2 | 36 | A:0.861111      | T:0.138889     |
| chr28 | 11127161 | 2 | 34 | T:0.0882353     | TG:0.911765    |
| chr28 | 11127552 | 2 | 36 | A:0.916667      | G:0.0833333    |
| chr28 | 11127885 | 2 | 28 | T:0.178571      | TG:0.821429    |
| chr28 | 11127933 | 2 | 34 | T:0.0882353     | C:0.911765     |
| chr28 | 11128622 | 2 | 36 | G:0.0277778     | A:0.972222     |
| chr28 | 11128738 | 2 | 38 | C:1 T:0         |                |
| chr28 | 11128850 | 2 | 38 | T:1 C:0         |                |
| chr28 | 11128854 | 2 | 34 | C:1 T:0         |                |
| chr28 | 11128957 | 2 | 36 | C:1 T:0         |                |
| chr28 | 11129294 | 2 | 40 | C:1 G:0         |                |
| chr28 | 11129364 | 2 | 34 | G:0.0588235     | A:0.941176     |
| chr28 | 11129661 | 2 | 38 | G:1 A:0         |                |
| chr28 | 11129712 | 2 | 38 | G:0.947368      | GAGA:0.0526316 |
| chr28 | 11129752 | 2 | 38 | A:0.921053      | G:0.0789474    |
| chr28 | 11129795 | 2 | 36 | C:0.916667      | T:0.0833333    |
| chr28 | 11129822 | 2 | 32 | A:0.90625       | C:0.09375      |
| chr28 | 11129834 | 2 | 34 | C:1 G:0         |                |
| chr28 | 11129868 | 2 | 32 | A:1 G:0         |                |
| chr28 | 11130117 | 2 | 30 | C:1 T:0         |                |
| chr28 | 11130274 | 2 | 38 | A:1 T:0         |                |
| chr28 | 11130544 | 2 | 36 | G:1 A:0         |                |
| chr28 | 11130804 | 2 | 36 | C:1 T:0         |                |
| chr28 | 11130815 | 2 | 36 | C:1 T:0         |                |
| chr28 | 11130859 | 2 | 34 | G:1 A:0         |                |
| chr28 | 11131063 | 2 | 36 | T:1 C:0         |                |
| chr28 | 11131224 | 2 | 38 | A:0.894737      | T:0.105263     |
| chr28 | 11131264 | 2 | 40 | T:0.125 C:0.875 |                |
| chr28 | 11131378 | 2 | 38 | C:1 T:0         |                |
| chr28 | 11131401 | 2 | 38 | G:1 A:0         |                |
| chr28 | 11131888 | 2 | 34 | C:1 T:0         |                |
| chr28 | 11131963 | 2 | 38 | C:0.0789474     | T:0.921053     |
| chr28 | 11132199 | 2 | 38 | GAAGC:0.973684  | G:0.0263158    |
| chr28 | 11132234 | 2 | 32 | C:1 T:0         |                |
| chr28 | 11132682 | 2 | 36 | CTGGGA:1 C:0    |                |
| chr28 | 11132688 | 2 | 36 | T:0.527778      | C:0.472222     |
| chr28 | 11132734 | 2 | 38 | G:1 T:0         |                |
| chr28 | 11133031 | 2 | 36 | A:1 G:0         |                |
| chr28 | 11133123 | 2 | 40 | A:1 C:0         |                |
| chr28 | 11133233 | 2 | 38 | T:1 C:0         |                |
| chr28 | 11133371 | 2 | 32 | A:1 G:0         |                |
| chr28 | 11133787 | 2 | 34 | T:0.558824      | G:0.441176     |
| chr28 | 11133958 | 2 | 36 | A:1 T:0         |                |
| chr28 | 11134127 | 2 | 36 | C:0.583333      | T:0.416667     |
| chr28 | 11134128 | 2 | 36 | A:0.5 G:0.5     |                |
| chr28 | 11134207 | 2 | 40 | G:0.6 GT:0.4    |                |
| chr28 | 11134396 | 2 | 34 | C:1 T:0         |                |
| chr28 | 11134854 | 2 | 34 | C:1 G:0         |                |
| chr28 | 11135111 | 2 | 38 | A:1 T:0         |                |
| chr28 | 11135266 | 2 | 38 | T:1 C:0         |                |
| chr28 | 11135305 | 2 | 38 | A:1 G:0         |                |

|       |                    |    |                     |             |                   |
|-------|--------------------|----|---------------------|-------------|-------------------|
| chr28 | 11135483 2         | 38 | G:1                 | T:0         |                   |
| chr28 | 11136856 2         | 34 | T:0.382353          |             | G:0.617647        |
| chr28 | 11137017 2         | 34 | G:1                 | A:0         |                   |
| chr28 | 11137148 2         | 38 | G:1                 | T:0         |                   |
| chr28 | 11137321 2         | 34 | T:0.5               | C:0.5       |                   |
| chr28 | 11137812 2         | 38 | C:0.973684          |             | T:0.0263158       |
| chr28 | 11138410 2         | 32 | C:0.6875            | T:0.3125    |                   |
| chr28 | 11138674 2         | 36 | C:0.638889          |             | T:0.361111        |
| chr28 | 11139107 2         | 36 | A:0.611111          |             | G:0.388889        |
| chr28 | 11139630 2         | 38 | G:0.578947          |             | A:0.421053        |
| chr28 | 11139927 2         | 40 | G:0.575             | A:0.425     |                   |
| chr28 | 11140069 2         | 34 | C:1                 | T:0         |                   |
| chr28 | 11141630 2         | 30 | CT:0.733333         |             | C:0.266667        |
| chr28 | 11141693 3         | 36 | C:0.583333          |             | CAGAGAG:0.0833333 |
|       | CAGAGAGAG:0.333333 |    |                     |             |                   |
| chr28 | 11141931 2         | 36 | A:0.416667          |             | T:0.583333        |
| chr28 | 11141962 2         | 36 | C:0.416667          |             | T:0.583333        |
| chr28 | 11142267 3         | 40 | T:0.65              | TAACAC:0.35 |                   |
|       | TAACATAACATAACAC:0 |    |                     |             |                   |
| chr28 | 11142363 2         | 36 | G:0.555556          |             | T:0.444444        |
| chr28 | 11142488 2         | 36 | G:0.5               | A:0.5       |                   |
| chr28 | 11142555 2         | 38 | CT:0.526316         |             | C:0.473684        |
| chr28 | 11142679 2         | 40 | A:0.875             | G:0.125     |                   |
| chr28 | 11142692 2         | 40 | AC:0                | A:1         |                   |
| chr28 | 11143194 2         | 34 | T:0                 | C:1         |                   |
| chr28 | 11143261 2         | 34 | T:0.529412          |             | C:0.470588        |
| chr28 | 11143450 2         | 38 | A:0.368421          |             | G:0.631579        |
| chr28 | 11144030 2         | 40 | C:0.575             | G:0.425     |                   |
| chr28 | 11144307 2         | 32 | T:0.5               | C:0.5       |                   |
| chr28 | 11144685 2         | 38 | A:0                 | G:1         |                   |
| chr28 | 11144887 2         | 38 | ACTCT:0.631579      |             | A:0.368421        |
| chr28 | 11145043 2         | 38 | T:0                 | C:1         |                   |
| chr28 | 11145093 2         | 34 | G:0.911765          |             | T:0.0882353       |
| chr28 | 11145162 2         | 38 | A:0.605263          |             | G:0.394737        |
| chr28 | 11145354 2         | 36 | A:0.444444          |             | G:0.555556        |
| chr28 | 11145417 2         | 40 | T:0.575             | C:0.425     |                   |
| chr28 | 11145436 2         | 38 | T:0.368421          |             | C:0.631579        |
| chr28 | 11145448 2         | 36 | C:0.888889          |             | A:0.111111        |
| chr28 | 11145545 2         | 34 | G:0.441176          |             | T:0.558824        |
| chr28 | 11145690 2         | 30 | C:0.4               | G:0.6       |                   |
| chr28 | 11146295 2         | 38 | C:0.473684          |             | T:0.526316        |
| chr28 | 11146472 2         | 38 | C:0.605263          |             | A:0.394737        |
| chr28 | 11146594 2         | 36 | C:0                 | A:1         |                   |
| chr28 | 11146971 2         | 36 | G:0.166667          |             | GA:0.833333       |
| chr28 | 11146974 4         | 38 | G:0.105263          |             | GGGAGA:0.157895   |
|       | GGGAGAGA:0.315789  |    | GGGAGAGAGA:0.421053 |             |                   |
| chr28 | 11147054 2         | 36 | C:0.361111          |             | T:0.638889        |
| chr28 | 11147463 2         | 40 | T:1                 | G:0         |                   |
| chr28 | 11147800 2         | 36 | T:0.444444          |             | C:0.555556        |
| chr28 | 11147871 2         | 28 | G:0.571429          |             | T:0.428571        |
| chr28 | 11148705 2         | 38 | A:0.552632          |             | G:0.447368        |
| chr28 | 11148781 2         | 40 | C:0.625             | T:0.375     |                   |
| chr28 | 11149467 2         | 34 | C:0.382353          |             | G:0.617647        |
| chr28 | 11149894 2         | 36 | CT:0.583333         |             | C:0.416667        |

|                 |          |   |    |                |            |              |
|-----------------|----------|---|----|----------------|------------|--------------|
| chr28           | 11149941 | 2 | 38 | G:1            | A:0        |              |
| chr28           | 11150015 | 2 | 38 | T:0.552632     |            | C:0.447368   |
| chr28           | 11150447 | 2 | 34 | T:0.558824     |            | C:0.441176   |
| chr28           | 11150546 | 2 | 34 | G:0.441176     |            | A:0.558824   |
| chr28           | 11150858 | 2 | 38 | G:1            | A:0        |              |
| chr28           | 11151445 | 2 | 36 | G:0.388889     |            | GGA:0.611111 |
| chr28           | 11151693 | 2 | 34 | C:0.705882     |            | G:0.294118   |
| chr28           | 11151793 | 2 | 38 | C:0.605263     |            | T:0.394737   |
| chr28           | 11151986 | 2 | 36 | C:0.555556     |            | A:0.444444   |
| chr28           | 11152066 | 2 | 40 | C:0            | T:1        |              |
| chr28           | 11152200 | 2 | 34 | G:0.617647     |            | A:0.382353   |
| chr28           | 11152206 | 3 | 36 | CTT:0.75       | C:0.111111 | CTTTT:       |
| 0.138889        |          |   |    |                |            |              |
| chr28           | 11152336 | 2 | 40 | G:0.975        | A:0.025    |              |
| chr28           | 11152348 | 2 | 40 | C:1            | T:0        |              |
| chr28           | 11152491 | 2 | 38 | T:0.473684     |            | A:0.526316   |
| chr28           | 11152563 | 2 | 38 | CAAAT:1        | C:0        |              |
| chr28           | 11152752 | 2 | 38 | T:0.684211     |            | C:0.315789   |
| chr28           | 11153222 | 2 | 36 | A:0.472222     |            | G:0.527778   |
| chr28           | 11153233 | 2 | 36 | G:1            | T:0        |              |
| chr28           | 11153341 | 2 | 38 | G:0.605263     |            | A:0.394737   |
| chr28           | 11153357 | 2 | 38 | A:0.631579     |            | G:0.368421   |
| chr28           | 11153836 | 2 | 36 | T:0.611111     |            | G:0.388889   |
| chr28           | 11153872 | 2 | 34 | T:1            | C:0        |              |
| chr28           | 11154148 | 2 | 40 | C:0.575        | T:0.425    |              |
| chr28           | 11154154 | 2 | 40 | A:0.575        | T:0.425    |              |
| chr28           | 11154158 | 2 | 40 | C:0.125        | T:0.875    |              |
| chr28           | 11154931 | 2 | 38 | G:0.868421     |            | T:0.131579   |
| chr28           | 11155137 | 2 | 36 | TA:0.138889    |            | T:0.861111   |
| chr28           | 11155363 | 2 | 38 | T:0            | TC:1       |              |
| chr28           | 11155369 | 2 | 38 | CA:0           | C:1        |              |
| chr28           | 11155378 | 2 | 38 | G:0            | GT:1       |              |
| chr28           | 11155382 | 2 | 38 | CT:0           | C:1        |              |
| chr28           | 11156260 | 2 | 32 | C:0.84375      |            | A:0.15625    |
| chr28           | 11156387 | 2 | 36 | TA:0.722222    |            | T:0.277778   |
| chr28           | 11157509 | 2 | 36 | G:0.916667     |            | A:0.0833333  |
| chr28           | 11157784 | 2 | 40 | A:0.55         | T:0.45     |              |
| chr28           | 11157947 | 2 | 36 | G:0.0833333    |            | A:0.916667   |
| chr28           | 11158269 | 2 | 34 | C:1            | G:0        |              |
| chr28           | 11158274 | 2 | 34 | C:1            | A:0        |              |
| chr28           | 11158471 | 2 | 40 | TC:1           | T:0        |              |
| chr28           | 11159109 | 2 | 38 | T:0.105263     |            | C:0.894737   |
| chr28           | 11159293 | 2 | 26 | G:1            | A:0        |              |
| chr28           | 11159412 | 2 | 32 | G:0.0625       | T:0.9375   |              |
| chr28           | 11159430 | 2 | 28 | T:0.857143     |            | C:0.142857   |
| chr28           | 11159637 | 2 | 38 | C:0.894737     |            | T:0.105263   |
| chr28           | 11159720 | 2 | 38 | T:0            | TA:1       |              |
| chr28           | 11159746 | 2 | 36 | T:0            | A:1        |              |
| chr28           | 11159748 | 2 | 36 | T:0            | G:1        |              |
| chr28           | 11159924 | 2 | 36 | T:1            | C:0        |              |
| chr28           | 11160453 | 3 | 36 | GTTT:0.0555556 |            | G:0.916667   |
| GTTTT:0.0277778 |          |   |    |                |            |              |
| chr28           | 11160461 | 2 | 36 | T:0.0833333    |            | A:0.916667   |
| chr28           | 11160509 | 2 | 34 | G:1            | T:0        |              |





|                |          |   |    |                 |               |
|----------------|----------|---|----|-----------------|---------------|
| chr28          | 11184949 | 2 | 38 | A:0.894737      | AT:0.105263   |
| chr28          | 11185127 | 2 | 36 | T:1 C:0         |               |
| chr28          | 11185181 | 2 | 36 | A:0.916667      | T:0.0833333   |
| chr28          | 11185384 | 3 | 34 | A:0.529412      | AGT:0.352941  |
| AGTGT:0.117647 |          |   |    |                 |               |
| chr28          | 11185526 | 2 | 38 | A:0.842105      | G:0.157895    |
| chr28          | 11186189 | 2 | 38 | AG:1 A:0        |               |
| chr28          | 11186315 | 2 | 36 | T:0.527778      | G:0.472222    |
| chr28          | 11186991 | 2 | 34 | A:0.382353      | AT:0.617647   |
| chr28          | 11187145 | 2 | 34 | T:0.852941      | A:0.147059    |
| chr28          | 11187384 | 3 | 30 | TAC:0.666667    | T:0.166667    |
| TACAC:0.166667 |          |   |    |                 |               |
| chr28          | 11187441 | 2 | 30 | T:0.9 C:0.1     |               |
| chr28          | 11187765 | 2 | 32 | A:0.75 G:0.25   |               |
| chr28          | 11187923 | 2 | 36 | A:1 G:0         |               |
| chr28          | 11188230 | 2 | 40 | A:0.375 T:0.625 |               |
| chr28          | 11188254 | 2 | 40 | T:0.6 TTG:0.4   |               |
| chr28          | 11188271 | 2 | 38 | A:0.105263      | T:0.894737    |
| chr28          | 11188390 | 2 | 34 | T:1 C:0         |               |
| chr28          | 11188604 | 2 | 36 | A:1 AT:0        |               |
| chr28          | 11188775 | 2 | 26 | C:1 T:0         |               |
| chr28          | 11189214 | 2 | 36 | C:1 T:0         |               |
| chr28          | 11189290 | 2 | 38 | A:0.552632      | ATGC:0.447368 |
| chr28          | 11189444 | 2 | 40 | AC:1 A:0        |               |
| chr28          | 11189943 | 2 | 36 | A:0.444444      | G:0.555556    |
| chr28          | 11189985 | 2 | 34 | G:1 C:0         |               |
| chr28          | 11190134 | 2 | 36 | G:0.888889      | C:0.111111    |
| chr28          | 11190159 | 2 | 36 | T:1 A:0         |               |
| chr28          | 11190487 | 2 | 36 | A:0.388889      | G:0.611111    |
| chr28          | 11190612 | 2 | 38 | C:0.526316      | T:0.473684    |
| chr28          | 11191046 | 2 | 36 | C:0.861111      | A:0.138889    |
| chr28          | 11191548 | 2 | 38 | G:1 A:0         |               |
| chr28          | 11191866 | 2 | 34 | A:1 G:0         |               |
| chr28          | 11191907 | 2 | 38 | A:1 G:0         |               |
| chr28          | 11192501 | 2 | 38 | T:0.394737      | C:0.605263    |
| chr28          | 11193109 | 2 | 36 | G:0.638889      | A:0.361111    |
| chr28          | 11193126 | 2 | 34 | C:1 T:0         |               |
| chr28          | 11193387 | 2 | 38 | A:0 C:1         |               |
| chr28          | 11193427 | 2 | 38 | C:0.657895      | T:0.342105    |
| chr28          | 11193547 | 2 | 34 | A:1 G:0         |               |
| chr28          | 11193767 | 2 | 40 | C:0.65 G:0.35   |               |
| chr28          | 11194490 | 2 | 34 | C:0.911765      | T:0.0882353   |
| chr28          | 11194601 | 2 | 38 | G:0.894737      | A:0.105263    |
| chr28          | 11194606 | 2 | 38 | C:0.368421      | CA:0.631579   |
| chr28          | 11194629 | 2 | 36 | C:1 T:0         |               |
| chr28          | 11194866 | 2 | 40 | G:0.675 A:0.325 |               |
| chr28          | 11195436 | 2 | 28 | CG:0.821429     | C:0.178571    |
| chr28          | 11195609 | 2 | 30 | A:0.666667      | T:0.333333    |
| chr28          | 11195630 | 2 | 32 | T:0.65625       | A:0.34375     |
| chr28          | 11195750 | 2 | 38 | TTC:0.394737    | T:0.605263    |
| chr28          | 11195893 | 2 | 36 | C:0.861111      | T:0.138889    |
| chr28          | 11196142 | 2 | 32 | C:0.96875       | T:0.03125     |
| chr28          | 11196217 | 2 | 40 | T:0.4 C:0.6     |               |
| chr28          | 11196473 | 2 | 38 | T:0.526316      | C:0.473684    |

|       |            |    |                  |              |
|-------|------------|----|------------------|--------------|
| chr28 | 11196601 2 | 38 | CTG:0.631579     | C:0.368421   |
| chr28 | 11197557 2 | 38 | C:1 G:0          |              |
| chr28 | 11197560 2 | 38 | T:0.842105       | C:0.157895   |
| chr28 | 11197658 2 | 34 | A:1 G:0          |              |
| chr28 | 11198089 2 | 40 | G:1 A:0          |              |
| chr28 | 11198252 2 | 40 | T:0.65 A:0.35    |              |
| chr28 | 11198341 2 | 40 | TTA:0.8 T:0.2    |              |
| chr28 | 11198570 2 | 38 | T:0.921053       | C:0.0789474  |
| chr28 | 11198628 2 | 38 | A:0.368421       | G:0.631579   |
| chr28 | 11198887 2 | 38 | T:0.868421       | C:0.131579   |
| chr28 | 11199236 2 | 40 | AAAG:0.925       | A:0.075      |
| chr28 | 11199522 2 | 38 | T:0.421053       | TAC:0.578947 |
| chr28 | 11199864 2 | 38 | A:0.868421       | T:0.131579   |
| chr28 | 11199915 2 | 40 | T:0.325 C:0.675  |              |
| chr28 | 11200037 2 | 36 | C:0.805556       | T:0.194444   |
| chr28 | 11200262 2 | 40 | T:0.35 A:0.65    |              |
| chr28 | 11200286 2 | 38 | C:1 T:0          |              |
| chr28 | 11200366 2 | 32 | C:1 T:0          |              |
| chr28 | 11200434 2 | 40 | ATAG:0.925       | A:0.075      |
| chr28 | 11200515 2 | 34 | A:0.558824       | C:0.441176   |
| chr28 | 11200585 2 | 34 | A:0.794118       | AAG:0.205882 |
| chr28 | 11200769 2 | 34 | AT:0.823529      | A:0.176471   |
| chr28 | 11200827 2 | 34 | C:0.705882       | T:0.294118   |
| chr28 | 11201104 2 | 40 | G:0.825 A:0.175  |              |
| chr28 | 11201365 2 | 38 | T:1 C:0          |              |
| chr28 | 11201602 2 | 34 | T:1 C:0          |              |
| chr28 | 11201640 2 | 38 | C:0.973684       | T:0.0263158  |
| chr28 | 11201650 2 | 38 | A:0.947368       | G:0.0526316  |
| chr28 | 11201836 2 | 34 | G:0.941176       | A:0.0588235  |
| chr28 | 11202021 2 | 34 | CAAAA:0.764706   | C:0.235294   |
| chr28 | 11202039 2 | 34 | CAA:0.764706     | C:0.235294   |
| chr28 | 11202048 2 | 38 | C:0.763158       | A:0.236842   |
| chr28 | 11202051 2 | 34 | AAAAAAC:0.764706 | A:0.235294   |
| chr28 | 11202054 3 | 38 | A:0.763158       | AAC:0 AACAC: |
|       | 0.236842   |    |                  |              |
| chr28 | 11202060 2 | 38 | A:1 C:0          |              |
| chr28 | 11202122 2 | 34 | C:0.970588       | T:0.0294118  |
| chr28 | 11202791 2 | 38 | T:0.394737       | C:0.605263   |
| chr28 | 11202793 2 | 38 | G:1 T:0          |              |
| chr28 | 11203019 2 | 36 | G:0.916667       | T:0.0833333  |
| chr28 | 11203521 2 | 32 | A:0.46875        | G:0.53125    |
| chr28 | 11203603 2 | 40 | T:0.875 C:0.125  |              |
| chr28 | 11204127 2 | 36 | A:0.638889       | G:0.361111   |
| chr28 | 11204563 2 | 36 | A:0.916667       | T:0.0833333  |
| chr28 | 11204776 2 | 38 | G:0.868421       | A:0.131579   |
| chr28 | 11204816 2 | 38 | T:0.342105       | A:0.657895   |
| chr28 | 11205012 2 | 38 | ATGTC:0.894737   | A:0.105263   |
| chr28 | 11205127 2 | 38 | A:0.815789       | G:0.184211   |
| chr28 | 11205576 2 | 38 | C:0.921053       | T:0.0789474  |
| chr28 | 11205841 2 | 38 | A:0.684211       | C:0.315789   |
| chr28 | 11206426 2 | 36 | A:0.138889       | G:0.861111   |
| chr28 | 11206441 2 | 36 | T:1 G:0          |              |
| chr28 | 11207252 2 | 38 | T:0.578947       | G:0.421053   |
| chr28 | 11207309 2 | 36 | A:0.916667       | T:0.0833333  |



|                          |          |   |    |                |          |               |          |
|--------------------------|----------|---|----|----------------|----------|---------------|----------|
| chr28                    | 11207665 | 2 | 38 | A:0            | C:1      |               |          |
| chr28                    | 11207955 | 2 | 38 | C:1            | T:0      |               |          |
| chr28                    | 11208138 | 2 | 38 | A:0.921053     |          | T:0.0789474   |          |
| chr28                    | 11208478 | 3 | 36 | TA:0.111111    |          | T:0.527778    |          |
| TAA:0.361111             |          |   |    |                |          |               |          |
| chr28                    | 11209025 | 2 | 36 | C:1            | T:0      |               |          |
| chr28                    | 11209347 | 2 | 34 | G:0            | A:1      |               |          |
| chr28                    | 11209461 | 2 | 40 | G:0            | A:1      |               |          |
| chr28                    | 11209546 | 2 | 40 | C:1            | T:0      |               |          |
| chr28                    | 11209700 | 2 | 38 | G:1            | A:0      |               |          |
| chr28                    | 11209761 | 2 | 38 | C:0.921053     |          | A:0.0789474   |          |
| chr28                    | 11210712 | 2 | 36 | G:1            | T:0      |               |          |
| chr28                    | 11211044 | 2 | 38 | C:0.894737     |          | T:0.105263    |          |
| chr28                    | 11211268 | 2 | 40 | G:0            | GAACAA:1 |               |          |
| chr28                    | 11211479 | 2 | 40 | G:0.625        | A:0.375  |               |          |
| chr28                    | 11211761 | 2 | 40 | G:0.925        | A:0.075  |               |          |
| chr28                    | 11211804 | 2 | 40 | CT:0.6         | C:0.4    |               |          |
| chr28                    | 11211807 | 3 | 40 | TAA:0.425      |          | T:0.5         | TA:0.075 |
| chr28                    | 11211844 | 2 | 36 | A:0.666667     |          | AGAGAGAGC:    |          |
| 0.333333                 |          |   |    |                |          |               |          |
| chr28                    | 11212061 | 2 | 38 | G:0.894737     |          | A:0.105263    |          |
| chr28                    | 11212096 | 2 | 38 | C:0.973684     |          | A:0.0263158   |          |
| chr28                    | 11212224 | 3 | 28 | A:0.785714     |          | AT:0.214286   |          |
| ATT:0                    |          |   |    |                |          |               |          |
| chr28                    | 11212567 | 2 | 38 | G:1            | A:0      |               |          |
| chr28                    | 11212891 | 2 | 34 | G:1            | A:0      |               |          |
| chr28                    | 11213287 | 2 | 34 | C:1            | T:0      |               |          |
| chr28                    | 11213555 | 2 | 40 | A:1            | G:0      |               |          |
| chr28                    | 11213752 | 2 | 40 | T:0.475        | C:0.525  |               |          |
| chr28                    | 11214289 | 2 | 38 | C:0.552632     |          | T:0.447368    |          |
| chr28                    | 11214381 | 2 | 38 | AAGG:0.894737  |          | A:0.105263    |          |
| chr28                    | 11215670 | 2 | 36 | A:0.444444     |          | G:0.555556    |          |
| chr28                    | 11215677 | 2 | 36 | G:0.666667     |          | A:0.333333    |          |
| chr28                    | 11215769 | 2 | 38 | G:0.578947     |          | A:0.421053    |          |
| chr28                    | 11215833 | 4 | 36 | CTTTT:0.111111 |          | C:0.388889    |          |
| CT:0.222222 CTT:0.277778 |          |   |    |                |          |               |          |
| chr28                    | 11216573 | 2 | 38 | C:1            | T:0      |               |          |
| chr28                    | 11216594 | 2 | 36 | T:0            | C:1      |               |          |
| chr28                    | 11216783 | 2 | 40 | C:0.55         | T:0.45   |               |          |
| chr28                    | 11217136 | 2 | 30 | C:0.6          | CT:0.4   |               |          |
| chr28                    | 11217137 | 2 | 30 | T:0.933333     |          | TTC:0.0666667 |          |
| chr28                    | 11217798 | 2 | 32 | A:0.90625      |          | T:0.09375     |          |
| chr28                    | 11217871 | 2 | 36 | C:0.416667     |          | T:0.583333    |          |
| chr28                    | 11217999 | 2 | 38 | A:0.473684     |          | C:0.526316    |          |
| chr28                    | 11218337 | 2 | 38 | A:0.605263     |          | G:0.394737    |          |
| chr28                    | 11218584 | 2 | 38 | G:0.421053     |          | A:0.578947    |          |
| chr28                    | 11218635 | 2 | 34 | G:0.382353     |          | A:0.617647    |          |
| chr28                    | 11218794 | 2 | 36 | C:0.416667     |          | A:0.583333    |          |
| chr28                    | 11218823 | 2 | 34 | G:0.852941     |          | A:0.147059    |          |
| chr28                    | 11218863 | 2 | 34 | C:0            | A:1      |               |          |
| chr28                    | 11219026 | 2 | 40 | T:0.475        | G:0.525  |               |          |
| chr28                    | 11219082 | 2 | 34 | G:0.5          | A:0.5    |               |          |
| chr28                    | 11219280 | 2 | 38 | C:0.578947     |          | G:0.421053    |          |
| chr28                    | 11219290 | 2 | 36 | A:0.555556     |          | G:0.444444    |          |

|                      |          |   |    |               |                     |
|----------------------|----------|---|----|---------------|---------------------|
| chr28                | 11219442 | 2 | 34 | CA:0.529412   | C:0.470588          |
| chr28                | 11219505 | 2 | 36 | C:0.611111    | T:0.388889          |
| chr28                | 11219509 | 2 | 36 | A:0.611111    | G:0.388889          |
| chr28                | 11219847 | 3 | 28 | GT:0.714286   | G:0.107143          |
| GTT:0.178571         |          |   |    |               |                     |
| chr28                | 11220133 | 2 | 34 | C:0.882353    | T:0.117647          |
| chr28                | 11220284 | 2 | 38 | C:1           | T:0                 |
| chr28                | 11220447 | 2 | 34 | C:0.647059    | T:0.352941          |
| chr28                | 11220625 | 2 | 40 | C:0.5         | T:0.5               |
| chr28                | 11220870 | 2 | 36 | A:0.916667    | C:0.0833333         |
| chr28                | 11220884 | 2 | 36 | A:0.611111    | G:0.388889          |
| chr28                | 11220953 | 2 | 38 | G:0.552632    | A:0.447368          |
| chr28                | 11221023 | 2 | 40 | T:0.575       | C:0.425             |
| chr28                | 11221156 | 2 | 38 | C:1           | G:0                 |
| chr28                | 11221493 | 3 | 38 | C:0.157895    | CT:0.815789         |
| CTT:0.0263158        |          |   |    |               |                     |
| chr28                | 11221594 | 3 | 40 | GTCTCTC:0.625 | G:0.225 GTC:0.15    |
| chr28                | 11221603 | 2 | 32 | TCTCTCTCACA:1 | T:0                 |
| chr28                | 11221609 | 2 | 36 | T:0.833333    | A:0.166667          |
| chr28                | 11222176 | 2 | 34 | G:0.529412    | T:0.470588          |
| chr28                | 11222232 | 2 | 38 | CAG:0.973684  | C:0.0263158         |
| chr28                | 11222269 | 2 | 36 | C:0.833333    | T:0.166667          |
| chr28                | 11222455 | 2 | 32 | T:0.40625     | C:0.59375           |
| chr28                | 11222692 | 2 | 40 | G:0.45        | A:0.55              |
| chr28                | 11222935 | 2 | 40 | G:1           | A:0                 |
| chr28                | 11222971 | 2 | 38 | T:0.473684    | C:0.526316          |
| chr28                | 11223019 | 2 | 40 | A:0.6         | ACCCCCATTCACCCT:0.4 |
| chr28                | 11223059 | 2 | 40 | A:0.45        | C:0.55              |
| chr28                | 11223154 | 2 | 34 | G:0.117647    | A:0.882353          |
| chr28                | 11223202 | 2 | 40 | T:0.15        | G:0.85              |
| chr28                | 11223225 | 2 | 40 | T:1           | G:0                 |
| chr28                | 11223363 | 2 | 34 | C:0.529412    | T:0.470588          |
| chr28                | 11223455 | 2 | 36 | T:0.555556    | C:0.444444          |
| chr28                | 11223465 | 2 | 36 | G:0.555556    | A:0.444444          |
| chr28                | 11223475 | 2 | 34 | G:1           | A:0                 |
| chr28                | 11224210 | 2 | 38 | T:1           | C:0                 |
| chr28                | 11224549 | 2 | 38 | C:1           | T:0                 |
| chr28                | 11225235 | 2 | 36 | A:0.5         | G:0.5               |
| chr28                | 11225598 | 2 | 38 | C:1           | T:0                 |
| chr28                | 11225914 | 2 | 34 | C:0.882353    | CCCA:0.117647       |
| chr28                | 11226115 | 2 | 38 | A:0.631579    | T:0.368421          |
| chr28                | 11226301 | 2 | 32 | C:0.46875     | T:0.53125           |
| chr28                | 11228114 | 2 | 30 | G:0.566667    | GC:0.433333         |
| chr28                | 11228121 | 2 | 32 | CG:1          | C:0                 |
| chr28                | 11228125 | 2 | 32 | C:0.59375     | G:0.40625           |
| chr28                | 11228255 | 2 | 32 | T:0.5625      | A:0.4375            |
| chr28                | 11228427 | 2 | 34 | G:1           | C:0                 |
| chr28                | 11228779 | 4 | 40 | AAC:0.625     | A:0 AACAC:          |
| 0.025 AACACACAC:0.35 |          |   |    |               |                     |
| chr28                | 11229233 | 2 | 34 | C:1           | T:0                 |
| chr28                | 11229617 | 2 | 36 | A:0           | T:1                 |
| chr28                | 11229875 | 2 | 34 | C:0.676471    | A:0.323529          |
| chr28                | 11229901 | 2 | 28 | T:0.571429    | C:0.428571          |
| chr28                | 11229938 | 2 | 26 | G:0.692308    | GC:0.307692         |

|       |               |    |                        |             |
|-------|---------------|----|------------------------|-------------|
| chr28 | 11230222 2    | 36 | C:0.555556             | T:0.444444  |
| chr28 | 11230368 2    | 38 | T:1 C:0                |             |
| chr28 | 11230391 2    | 38 | A:1 C:0                |             |
| chr28 | 11230393 2    | 38 | TC:1 T:0               |             |
| chr28 | 11230722 2    | 34 | C:0.5 T:0.5            |             |
| chr28 | 11230730 2    | 34 | C:1 T:0                |             |
| chr28 | 11230739 2    | 34 | C:0 T:1                |             |
| chr28 | 11230799 2    | 38 | GTGTCTCTGTCTC:0.526316 | G:          |
|       | 0.473684      |    |                        |             |
| chr28 | 11230977 2    | 38 | C:0.947368             | T:0.0526316 |
| chr28 | 11231111 2    | 32 | A:0 G:1                |             |
| chr28 | 11231332 2    | 32 | T:0.6875 G:0.3125      |             |
| chr28 | 11231353 2    | 34 | AC:1 A:0               |             |
| chr28 | 11231357 3    | 34 | A:1 C:0                | AAC:0       |
| chr28 | 11231362 3    | 34 | C:0.588235             | A:0.411765  |
|       | CA:0          |    |                        |             |
| chr28 | 11231364 2    | 34 | AAC:1 A:0              |             |
| chr28 | 11231505 2    | 34 | C:0.558824             | T:0.441176  |
| chr28 | 11231888 2    | 36 | T:0.555556             | C:0.444444  |
| chr28 | 11231912 2    | 34 | G:0.558824             | A:0.441176  |
| chr28 | 11232195 2    | 40 | G:0.9 A:0.1            |             |
| chr28 | 11232372 2    | 40 | C:0.5 G:0.5            |             |
| chr28 | 11232389 2    | 40 | C:0.5 T:0.5            |             |
| chr28 | 11232628 2    | 38 | C:0.552632             | T:0.447368  |
| chr28 | 11232632 2    | 38 | T:0.552632             | C:0.447368  |
| chr28 | 11232796 2    | 36 | A:0.555556             | G:0.444444  |
| chr28 | 11232823 2    | 36 | A:0.583333             | G:0.416667  |
| chr28 | 11232935 2    | 34 | C:0.617647             | T:0.382353  |
| chr28 | 11233037 2    | 34 | A:0.617647             | G:0.382353  |
| chr28 | 11233049 2    | 34 | A:0.617647             | G:0.382353  |
| chr28 | 11233051 2    | 34 | T:0.617647             | C:0.382353  |
| chr28 | 11233069 2    | 34 | T:0.617647             | C:0.382353  |
| chr28 | 11233204 2    | 38 | G:1 T:0                |             |
| chr28 | 11233366 2    | 34 | A:0.529412             | T:0.470588  |
| chr28 | 11233477 2    | 36 | C:0.416667             | T:0.583333  |
| chr28 | 11234054 3    | 34 | T:0.588235             | TA:0.382353 |
|       | TAA:0.0294118 |    |                        |             |
| chr28 | 11234137 2    | 36 | A:0 C:1                |             |
| chr28 | 11234325 2    | 38 | C:0.526316             | G:0.473684  |
| chr28 | 11234378 2    | 36 | G:0.527778             | T:0.472222  |
| chr28 | 11234982 2    | 34 | G:0.529412             | A:0.470588  |
| chr28 | 11234992 2    | 34 | G:0.529412             | A:0.470588  |
| chr28 | 11235094 2    | 32 | T:0.40625              | C:0.59375   |
| chr28 | 11235251 2    | 34 | T:0.588235             | C:0.411765  |
| chr28 | 11235275 2    | 36 | G:0.944444             | A:0.0555556 |
| chr28 | 11235614 2    | 32 | A:0.46875              | G:0.53125   |
| chr28 | 11235736 2    | 38 | C:0.552632             | T:0.447368  |
| chr28 | 11235988 2    | 36 | T:0.416667             | C:0.583333  |
| chr28 | 11236283 2    | 34 | G:0.470588             | T:0.529412  |
| chr28 | 11236285 2    | 34 | G:0.470588             | T:0.529412  |
| chr28 | 11236615 2    | 38 | G:0.526316             | A:0.473684  |
| chr28 | 11236617 2    | 38 | A:0.526316             | C:0.473684  |
| chr28 | 11237023 2    | 38 | C:0.526316             | T:0.473684  |
| chr28 | 11237126 2    | 36 | A:0.5 AT:0.5           |             |

|                            |          |   |    |                      |          |             |
|----------------------------|----------|---|----|----------------------|----------|-------------|
| chr28                      | 11237137 | 2 | 36 | T:0.5                | G:0.5    |             |
| chr28                      | 11237162 | 2 | 36 | C:0.5                | G:0.5    |             |
| chr28                      | 11237215 | 2 | 36 | A:0.611111           |          | C:0.388889  |
| chr28                      | 11237220 | 2 | 36 | C:0.611111           |          | G:0.388889  |
| chr28                      | 11237236 | 2 | 32 | A:0                  | G:1      |             |
| chr28                      | 11237285 | 2 | 38 | T:0.5                | TAA:0.5  |             |
| chr28                      | 11237310 | 2 | 38 | A:0.5                | T:0.5    |             |
| chr28                      | 11237500 | 2 | 38 | T:0.921053           |          | C:0.0789474 |
| chr28                      | 11237567 | 2 | 38 | A:0.5                | G:0.5    |             |
| chr28                      | 11237652 | 2 | 34 | T:0.5                | C:0.5    |             |
| chr28                      | 11237739 | 2 | 40 | G:1                  | A:0      |             |
| chr28                      | 11237785 | 2 | 40 | A:0.95               | T:0.05   |             |
| chr28                      | 11237827 | 2 | 40 | A:0.5                | G:0.5    |             |
| chr28                      | 11237836 | 2 | 40 | C:0.975              | T:0.025  |             |
| chr28                      | 11237954 | 2 | 38 | G:0.473684           |          | C:0.526316  |
| chr28                      | 11238024 | 2 | 38 | T:0.473684           |          | G:0.526316  |
| chr28                      | 11238028 | 2 | 38 | G:0.473684           |          | A:0.526316  |
| chr28                      | 11238594 | 2 | 38 | T:0.526316           |          | C:0.473684  |
| chr28                      | 11238761 | 2 | 32 | G:0.59375            |          | C:0.40625   |
| chr28                      | 11238777 | 2 | 34 | C:1                  | T:0      |             |
| chr28                      | 11238894 | 2 | 38 | G:0.578947           |          | A:0.421053  |
| chr28                      | 11238981 | 2 | 40 | G:0.5                | A:0.5    |             |
| chr28                      | 11239148 | 2 | 36 | G:0.5                | A:0.5    |             |
| chr28                      | 11239320 | 2 | 40 | G:0.575              | A:0.425  |             |
| chr28                      | 11239352 | 3 | 32 | GT:0.375             | G:0.125  | GTT:0.5     |
| chr28                      | 11239856 | 2 | 38 | TA:1                 | T:0      |             |
| chr28                      | 11240512 | 2 | 38 | C:0.5                | T:0.5    |             |
| chr28                      | 11241265 | 2 | 38 | G:1                  | T:0      |             |
| chr28                      | 11241476 | 2 | 28 | G:0.5                | A:0.5    |             |
| chr28                      | 11241518 | 2 | 26 | C:1                  | T:0      |             |
| chr28                      | 11241600 | 2 | 24 | G:0.708333           |          | C:0.291667  |
| chr28                      | 11241628 | 2 | 36 | T:1                  | TAAAAA:0 |             |
| chr28                      | 11241629 | 3 | 34 | T:0.676471           |          | A:0.294118  |
| TAAA:0.0294118             |          |   |    |                      |          |             |
| chr28                      | 11241715 | 2 | 38 | G:0                  | A:1      |             |
| chr28                      | 11241740 | 2 | 34 | A:0.5                | T:0.5    |             |
| chr28                      | 11241788 | 2 | 32 | T:0.53125            |          | A:0.46875   |
| chr28                      | 11241891 | 2 | 36 | C:0.555556           |          | T:0.444444  |
| chr28                      | 11242060 | 2 | 34 | G:0.0294118          |          | T:0.970588  |
| chr28                      | 11242096 | 2 | 38 | G:1                  | A:0      |             |
| chr28                      | 11242382 | 2 | 38 | AG:1                 | A:0      |             |
| chr28                      | 11243014 | 2 | 34 | T:1                  | C:0      |             |
| chr28                      | 11243101 | 5 | 38 | CT:0.368421          |          | C:0.0789474 |
| CTT:0.131579 CTTT:0.131579 |          |   |    |                      |          |             |
| chr28                      | 11244344 | 2 | 40 | C:1                  | T:0      |             |
| chr28                      | 11244417 | 2 | 34 | A:1                  | G:0      |             |
| chr28                      | 11244560 | 2 | 36 | ATCTCTCTCTC:0.666667 |          | A:          |
| 0.333333                   |          |   |    |                      |          |             |
| chr28                      | 11244902 | 2 | 36 | G:0.666667           |          | A:0.333333  |
| chr28                      | 11245275 | 2 | 36 | C:0.583333           |          | T:0.416667  |
| chr28                      | 11245411 | 2 | 34 | G:0.441176           |          | C:0.558824  |
| chr28                      | 11245427 | 2 | 36 | C:1                  | T:0      |             |
| chr28                      | 11245898 | 2 | 36 | C:0.5                | T:0.5    |             |
| chr28                      | 11245938 | 3 | 36 | G:1                  | A:0      | T:0         |

|       |                |   |    |                        |                 |
|-------|----------------|---|----|------------------------|-----------------|
| chr28 | 11245946       | 2 | 36 | C:0.666667             | A:0.333333      |
| chr28 | 11246330       | 2 | 32 | G:1                    | A:0             |
| chr28 | 11246627       | 2 | 38 | A:0.973684             | G:0.0263158     |
| chr28 | 11246725       | 2 | 36 | G:0.527778             | C:0.472222      |
| chr28 | 11246979       | 2 | 34 | T:1                    | G:0             |
| chr28 | 11247420       | 2 | 40 | G:1                    | A:0             |
| chr28 | 11247430       | 2 | 40 | A:0.9                  | G:0.1           |
| chr28 | 11247484       | 2 | 38 | G:0.868421             | A:0.131579      |
| chr28 | 11247492       | 2 | 38 | T:0.947368             | C:0.0526316     |
| chr28 | 11247544       | 2 | 38 | T:0.921053             | C:0.0789474     |
| chr28 | 11248338       | 2 | 36 | C:1                    | T:0             |
| chr28 | 11248459       | 2 | 38 | GTCAA:0.447368         | G:0.552632      |
| chr28 | 11248466       | 2 | 38 | G:0.447368             | GGCC:0.552632   |
| chr28 | 11248468       | 2 | 38 | C:0.447368             | CAG:0.552632    |
| chr28 | 11248509       | 2 | 38 | G:0.921053             | A:0.0789474     |
| chr28 | 11248833       | 2 | 34 | C:1                    | T:0             |
| chr28 | 11248948       | 2 | 40 | G:0.925                | C:0.075         |
| chr28 | 11249268       | 2 | 34 | C:1                    | T:0             |
| chr28 | 11249413       | 2 | 34 | C:1                    | G:0             |
| chr28 | 11249510       | 2 | 32 | C:1                    | A:0             |
| chr28 | 11249816       | 2 | 34 | T:0.882353             | C:0.117647      |
| chr28 | 11249942       | 2 | 38 | T:1                    | C:0             |
| chr28 | 11249996       | 2 | 36 | T:0.916667             | TTC:0.0833333   |
| chr28 | 11250040       | 2 | 38 | G:0.815789             | GTCTC:0.184211  |
| chr28 | 11250044       | 2 | 36 | C:1                    | CTG:0           |
| chr28 | 11250047       | 2 | 34 | TCTCACACACACA:0.911765 | T:              |
|       | 0.0882353      |   |    |                        |                 |
| chr28 | 11250049       | 2 | 34 | TCACA:1                | T:0             |
| chr28 | 11250055       | 2 | 36 | A:1                    | T:0             |
| chr28 | 11250057       | 2 | 36 | A:1                    | T:0             |
| chr28 | 11250059       | 2 | 36 | A:1                    | T:0             |
| chr28 | 11250061       | 2 | 30 | A:1                    | T:0             |
| chr28 | 11250063       | 2 | 28 | A:1                    | T:0             |
| chr28 | 11250065       | 2 | 28 | A:1                    | T:0             |
| chr28 | 11250313       | 2 | 32 | C:0.90625              | T:0.09375       |
| chr28 | 11250331       | 2 | 32 | T:0.875                | C:0.125         |
| chr28 | 11250705       | 2 | 36 | A:1                    | G:0             |
| chr28 | 11251322       | 2 | 34 | T:0.911765             | C:0.0882353     |
| chr28 | 11251447       | 2 | 36 | T:1                    | C:0             |
| chr28 | 11251462       | 2 | 38 | G:1                    | A:0             |
| chr28 | 11251590       | 2 | 36 | GT:1                   | G:0             |
| chr28 | 11251993       | 2 | 36 | C:1                    | T:0             |
| chr28 | 11252102       | 2 | 40 | T:1                    | C:0             |
| chr28 | 11252187       | 2 | 38 | C:0.789474             | G:0.210526      |
| chr28 | 11252656       | 2 | 36 | C:1                    | A:0             |
| chr28 | 11252805       | 4 | 40 | CTTCT:0.675            | C:0.225 CTTTCT: |
|       | 0.05           |   |    |                        |                 |
|       | CTTCTTTCT:0.05 |   |    |                        |                 |
| chr28 | 11252860       | 2 | 40 | C:1                    | CT:0            |
| chr28 | 11253422       | 2 | 36 | G:1                    | T:0             |
| chr28 | 11253544       | 2 | 40 | G:0.8                  | C:0.2           |
| chr28 | 11253727       | 2 | 34 | C:0.794118             | G:0.205882      |
| chr28 | 11253832       | 2 | 40 | C:0.85                 | T:0.15          |
| chr28 | 11253984       | 2 | 38 | G:0.473684             | A:0.526316      |
| chr28 | 11254421       | 2 | 34 | C:1                    | T:0             |

|                                    |          |   |    |                    |             |                  |
|------------------------------------|----------|---|----|--------------------|-------------|------------------|
| chr28                              | 11254589 | 2 | 34 | G:1                | A:0         |                  |
| chr28                              | 11254881 | 2 | 40 | A:0.65             | G:0.35      |                  |
| chr28                              | 11255004 | 2 | 40 | G:1                | C:0         |                  |
| chr28                              | 11255252 | 2 | 40 | GC:1               | G:0         |                  |
| chr28                              | 11255254 | 2 | 40 | C:1                | A:0         |                  |
| chr28                              | 11255404 | 2 | 34 | T:0.882353         |             | C:0.117647       |
| chr28                              | 11255687 | 2 | 38 | CT:1               | C:0         |                  |
| chr28                              | 11255734 | 2 | 38 | T:0.815789         |             | C:0.184211       |
| chr28                              | 11256193 | 2 | 40 | T:1                | A:0         |                  |
| chr28                              | 11256194 | 2 | 40 | A:0.85             | G:0.15      |                  |
| chr28                              | 11256428 | 2 | 36 | G:0.527778         |             | A:0.472222       |
| chr28                              | 11256480 | 2 | 40 | T:0.325            | A:0.675     |                  |
| chr28                              | 11256678 | 2 | 38 | G:0.815789         |             | A:0.184211       |
| chr28                              | 11256791 | 2 | 30 | AG:0.833333        |             | A:0.166667       |
| chr28                              | 11257115 | 2 | 38 | G:1                | A:0         |                  |
| chr28                              | 11257131 | 2 | 38 | A:0.789474         |             | G:0.210526       |
| chr28                              | 11257256 | 2 | 38 | A:0.763158         |             | G:0.236842       |
| chr28                              | 11257622 | 2 | 34 | T:0.823529         |             | A:0.176471       |
| chr28                              | 11257676 | 2 | 38 | T:0.842105         |             | C:0.157895       |
| chr28                              | 11257751 | 2 | 38 | G:0.842105         |             | A:0.157895       |
| chr28                              | 11257777 | 2 | 38 | T:0.815789         |             | C:0.184211       |
| chr28                              | 11257868 | 2 | 34 | T:0.205882         |             | C:0.794118       |
| chr28                              | 11257917 | 2 | 38 | A:0.815789         |             | T:0.184211       |
| chr28                              | 11257919 | 2 | 38 | A:0.815789         |             | C:0.184211       |
| chr28                              | 11257986 | 2 | 36 | C:0.666667         |             | T:0.333333       |
| chr28                              | 11258344 | 2 | 38 | G:0.631579         |             | GT:0.368421      |
| chr28                              | 11258384 | 2 | 38 | GATGGGTAA:0.947368 |             | G:0.0526316      |
| chr28                              | 11258487 | 2 | 28 | C:1                | T:0         |                  |
| chr28                              | 11258540 | 2 | 38 | A:0                | G:1         |                  |
| chr28                              | 11258557 | 2 | 38 | A:0.842105         |             | G:0.157895       |
| chr28                              | 11258598 | 2 | 38 | A:0                | G:1         |                  |
| chr28                              | 11258631 | 2 | 34 | A:1                | C:0         |                  |
| chr28                              | 11259057 | 2 | 30 | C:0.866667         |             | A:0.133333       |
| chr28                              | 11259219 | 2 | 36 | G:1                | A:0         |                  |
| chr28                              | 11259309 | 2 | 34 | C:1                | T:0         |                  |
| chr28                              | 11259354 | 2 | 36 | T:0.333333         |             | C:0.666667       |
| chr28                              | 11259463 | 2 | 34 | G:0.823529         |             | A:0.176471       |
| chr28                              | 11259464 | 2 | 34 | T:0.823529         |             | C:0.176471       |
| chr28                              | 11259560 | 2 | 40 | T:0.825            | TC:0.175    |                  |
| chr28                              | 11259577 | 3 | 40 | C:0.425            | CT:0.575    |                  |
| CTTTTCTTTTCTTTTCT:0                |          |   |    |                    |             |                  |
| chr28                              | 11259591 | 2 | 40 | C:0.825            | CT:0.175    |                  |
| chr28                              | 11259596 | 4 | 40 | C:0.825            | T:0.175     |                  |
| CTTTTCTTTTCTTTTCTTTTCTTTTCTTTCTT:0 |          |   |    |                    |             |                  |
| chr28                              | 11259606 | 2 | 40 | T:0.825            | TTTC:0.175  |                  |
| chr28                              | 11259619 | 3 | 40 | C:0.8              | CTTTCT:0.05 |                  |
| CTTTCTTTTCT:0.15                   |          |   |    |                    |             |                  |
| chr28                              | 11259668 | 2 | 38 | TTCTC:0.921053     |             | T:0.0789474      |
| chr28                              | 11259670 | 4 | 36 | C:0.527778         |             | CTCCTT:0.0555556 |
| CTCCTTTCCTT:0.416667               |          |   |    |                    |             |                  |
| CTCCTTTCCTTTCCTT:0                 |          |   |    |                    |             |                  |
| chr28                              | 11259675 | 2 | 38 | T:0.921053         |             | TTTC:0.0789474   |
| chr28                              | 11259784 | 2 | 38 | G:0.526316         |             | T:0.473684       |
| chr28                              | 11260071 | 2 | 36 | G:0.861111         |             | T:0.138889       |

|               |            |   |    |                   |                   |
|---------------|------------|---|----|-------------------|-------------------|
| chr28         | 11260086   | 2 | 38 | T:0               | TTTTAGATC:1       |
| chr28         | 11260125   | 2 | 38 | C:0.921053        | T:0.0789474       |
| chr28         | 11260401   | 2 | 30 | CTA:0.9           | C:0.1             |
| chr28         | 11260415   | 2 | 30 | CTTT:1            | C:0               |
| chr28         | 11260667   | 2 | 36 | G:0.444444        | A:0.555556        |
| chr28         | 11260926   | 2 | 34 | G:0.970588        | A:0.0294118       |
| chr28         | 11261438   | 2 | 36 | A:0.916667        | AC:0.0833333      |
| chr28         | 11261560   | 2 | 36 | G:0.888889        | GTT:0.111111      |
| chr28         | 11261562   | 4 | 36 | A:0.472222        | AT:0.416667       |
| ATT:0         | T:0.111111 |   |    |                   |                   |
| chr28         | 11262845   | 3 | 36 | C:0.527778        | CT:0.444444       |
| CTT:0.0277778 |            |   |    |                   |                   |
| chr28         | 11263466   | 2 | 38 | G:1               | A:0               |
| chr28         | 11263663   | 2 | 40 | A:0.9             | C:0.1             |
| chr28         | 11263809   | 2 | 38 | C:1               | G:0               |
| chr28         | 11264751   | 2 | 36 | C:0.805556        | CTTTTTTTTTTTTTTT: |
| 0.194444      |            |   |    |                   |                   |
| chr28         | 11264822   | 2 | 32 | G:0.1875          | C:0.8125          |
| chr28         | 11265008   | 2 | 38 | C:0.5             | T:0.5             |
| chr28         | 11265410   | 2 | 40 | C:0.475           | T:0.525           |
| chr28         | 11266285   | 2 | 38 | C:0               | CA:1              |
| chr28         | 11266576   | 2 | 38 | TATC:0.868421     | T:0.131579        |
| chr28         | 11266609   | 3 | 40 | C:0.85            | CATT:0.1          |
| chr28         | 11266641   | 2 | 36 | A:0.722222        | CATCATT:0.05      |
| chr28         | 11266863   | 2 | 36 | G:1               | G:0.277778        |
| chr28         | 11267548   | 2 | 36 | T:1               | A:0               |
| chr28         | 11269073   | 2 | 40 | TTAATACCTGA:0.825 | C:0               |
| chr28         | 11269991   | 2 | 38 | C:0.157895        | T:0.175           |
| chr28         | 11270027   | 2 | 40 | C:0.9             | T:0.842105        |
| chr28         | 11270760   | 2 | 36 | C:0.9             | T:0.1             |
| chr28         | 11270764   | 3 | 36 | G:0.944444        | GAA:0.0555556     |
| 0.944444      |            |   |    | C:0               | A:0.0555556       |
|               |            |   |    |                   | CA:               |
| chr28         | 11271011   | 2 | 38 | G:1               | A:0               |
| chr28         | 11271584   | 2 | 36 | G:0.0833333       | A:0.916667        |
| chr28         | 11272131   | 2 | 30 | A:0               | G:1               |
| chr28         | 11272608   | 2 | 36 | G:0.944444        | A:0.0555556       |
| chr28         | 11274137   | 2 | 30 | GT:0.9            | G:0.1             |
| chr28         | 11274150   | 2 | 34 | T:1               | G:0               |
| chr28         | 11274151   | 3 | 34 | T:0.176471        | G:0.470588        |
| TG:0.352941   |            |   |    |                   |                   |
| chr28         | 11274749   | 2 | 36 | A:1               | G:0               |
| chr28         | 11274914   | 2 | 34 | T:1               | C:0               |
| chr28         | 11274951   | 2 | 36 | C:0.0555556       | T:0.944444        |
| chr28         | 11274968   | 2 | 36 | A:0               | ATG:1             |
| chr28         | 11275014   | 2 | 36 | G:0.0833333       | A:0.916667        |
| chr28         | 11275204   | 2 | 38 | A:1               | C:0               |
| chr28         | 11275219   | 2 | 38 | A:0.526316        | G:0.473684        |
| chr28         | 11275614   | 2 | 40 | T:0               | C:1               |
| chr28         | 11275639   | 2 | 38 | G:0.842105        | A:0.157895        |
| chr28         | 11276077   | 2 | 38 | C:1               | T:0               |
| chr28         | 11276601   | 2 | 34 | T:0.911765        | G:0.0882353       |
| chr28         | 11276831   | 2 | 38 | GAAGAAC:0.947368  | G:0.0526316       |
| chr28         | 11276837   | 2 | 38 | C:0.947368        | CGTT:0.0526316    |
| chr28         | 11277354   | 2 | 40 | A:0.925           | C:0.075           |

|       |          |   |    |                          |             |
|-------|----------|---|----|--------------------------|-------------|
| chr28 | 11277635 | 2 | 34 | A:0.911765               | G:0.0882353 |
| chr28 | 11277721 | 2 | 40 | C:0.925 T:0.075          |             |
| chr28 | 11278420 | 2 | 36 | C:0.638889               | T:0.361111  |
| chr28 | 11278902 | 2 | 34 | G:1 A:0                  |             |
| chr28 | 11278938 | 2 | 34 | C:0.941176               | T:0.0588235 |
| chr28 | 11279515 | 2 | 36 | A:0.805556               | C:0.194444  |
| chr28 | 11279669 | 2 | 34 | T:0.941176               | C:0.0588235 |
| chr28 | 11279683 | 2 | 32 | T:0.90625                | C:0.09375   |
| chr28 | 11279726 | 2 | 24 | GC:0.333333              | G:0.666667  |
| chr28 | 11279768 | 2 | 36 | T:0.944444               | C:0.0555556 |
| chr28 | 11279772 | 2 | 36 | AC:0.944444              | A:0.0555556 |
| chr28 | 11279774 | 2 | 38 | C:0.210526               | A:0.789474  |
| chr28 | 11279778 | 2 | 36 | C:0.944444               | A:0.0555556 |
| chr28 | 11279779 | 2 | 38 | C:0.210526               | A:0.789474  |
| chr28 | 11279780 | 2 | 36 | AAATT:0.944444           | A:0.0555556 |
| chr28 | 11279784 | 2 | 38 | T:0.210526               | A:0.789474  |
| chr28 | 11279788 | 2 | 36 | CCAAACCAAACCAAT:0.944444 | C:0.0555556 |
| chr28 | 11279789 | 2 | 34 | C:0.0588235              | A:0.941176  |
| chr28 | 11279794 | 2 | 34 | C:0.0588235              | A:0.941176  |
| chr28 | 11279799 | 2 | 34 | C:0.176471               | A:0.823529  |
| chr28 | 11279808 | 2 | 36 | C:0.888889               | T:0.111111  |
| chr28 | 11280003 | 2 | 36 | C:0.944444               | T:0.0555556 |
| chr28 | 11280036 | 2 | 34 | C:0.941176               | T:0.0588235 |
| chr28 | 11280704 | 2 | 36 | GAGAGGA:0.861111         | G:0.138889  |
| chr28 | 11280712 | 2 | 36 | G:0.861111               | T:0.138889  |
| chr28 | 11282085 | 2 | 36 | C:0.944444               | A:0.0555556 |
| chr28 | 11282186 | 2 | 40 | A:1 T:0                  |             |
| chr28 | 11282191 | 2 | 40 | A:1 T:0                  |             |
| chr28 | 11282475 | 2 | 36 | G:0.916667               | C:0.0833333 |
| chr28 | 11282869 | 2 | 36 | G:0.861111               | A:0.138889  |
| chr28 | 11283417 | 2 | 40 | CAT:1 C:0                |             |
| chr28 | 11284267 | 2 | 34 | C:0.764706               | T:0.235294  |
| chr28 | 11284521 | 2 | 36 | T:1 C:0                  |             |
| chr28 | 11284626 | 2 | 36 | T:0.944444               | C:0.0555556 |
| chr28 | 11284660 | 3 | 38 | TAA:0.421053             | T:0.105263  |
| chr28 | 11285707 | 2 | 36 | C:0.916667               | T:0.0833333 |
| chr28 | 11286498 | 2 | 36 | T:1 G:0                  |             |
| chr28 | 11287034 | 2 | 28 | C:0.607143               | T:0.392857  |
| chr28 | 11287104 | 2 | 38 | A:1 G:0                  |             |
| chr28 | 11287174 | 2 | 36 | G:1 A:0                  |             |
| chr28 | 11287793 | 2 | 30 | C:0.9 A:0.1              |             |
| chr28 | 11288242 | 2 | 32 | C:1 A:0                  |             |
| chr28 | 11289043 | 2 | 38 | A:0 G:1                  |             |
| chr28 | 11289271 | 2 | 40 | T:0 C:1                  |             |
| chr28 | 11291618 | 2 | 36 | T:0.25 C:0.75            |             |
| chr28 | 11291962 | 2 | 40 | A:0 G:1                  |             |
| chr28 | 11292808 | 2 | 36 | G:1 A:0                  |             |
| chr28 | 11292889 | 2 | 36 | C:1 T:0                  |             |
| chr28 | 11294552 | 2 | 36 | CT:0.972222              | C:0.0277778 |
| chr28 | 11294976 | 2 | 26 | TA:0.769231              | T:0.230769  |
| chr28 | 11295338 | 2 | 40 | C:1 T:0                  |             |
| chr28 | 11295532 | 2 | 34 | C:0.911765               | T:0.0882353 |



|       |            |    |                               |             |
|-------|------------|----|-------------------------------|-------------|
| chr28 | 11295568 2 | 40 | C:0.175 G:0.825               |             |
| chr28 | 11295581 4 | 40 | CTT:0.1 C:0.475 CT:0.2 CTTTT: |             |
|       | 0.225      |    |                               |             |
| chr28 | 11295610 2 | 38 | A:0.815789                    | G:0.184211  |
| chr28 | 11295881 2 | 40 | G:0.75 A:0.25                 |             |
| chr28 | 11296048 2 | 40 | T:0.75 G:0.25                 |             |
| chr28 | 11296086 3 | 38 | AT:0.736842                   | A:0 ATT:    |
|       | 0.263158   |    |                               |             |
| chr28 | 11296136 2 | 38 | T:0.263158                    | C:0.736842  |
| chr28 | 11296485 2 | 40 | T:0.25 G:0.75                 |             |
| chr28 | 11296493 2 | 40 | GA:0.25 G:0.75                |             |
| chr28 | 11296594 2 | 36 | G:0.861111                    | A:0.138889  |
| chr28 | 11296597 2 | 36 | C:0.861111                    | T:0.138889  |
| chr28 | 11296669 2 | 40 | T:0.85 C:0.15                 |             |
| chr28 | 11296786 2 | 36 | A:0.277778                    | G:0.722222  |
| chr28 | 11296838 2 | 36 | C:0.555556                    | T:0.444444  |
| chr28 | 11296852 2 | 34 | G:0.794118                    | A:0.205882  |
| chr28 | 11296855 2 | 34 | A:0.794118                    | T:0.205882  |
| chr28 | 11297063 2 | 36 | C:0.277778                    | A:0.722222  |
| chr28 | 11297074 2 | 36 | T:0 C:1                       |             |
| chr28 | 11297102 2 | 38 | T:0.236842                    | C:0.763158  |
| chr28 | 11297140 2 | 36 | A:0.277778                    | C:0.722222  |
| chr28 | 11297177 2 | 38 | C:0.236842                    | T:0.763158  |
| chr28 | 11297189 2 | 38 | T:0.131579                    | C:0.868421  |
| chr28 | 11297276 2 | 40 | C:0.85 G:0.15                 |             |
| chr28 | 11297294 2 | 40 | A:0.85 C:0.15                 |             |
| chr28 | 11297441 2 | 36 | C:0 CAAAT:1                   |             |
| chr28 | 11297774 2 | 40 | GT:1 G:0                      |             |
| chr28 | 11297834 2 | 40 | C:0.775 T:0.225               |             |
| chr28 | 11297841 2 | 40 | T:0 C:1                       |             |
| chr28 | 11297904 2 | 38 | A:0 G:1                       |             |
| chr28 | 11297938 2 | 38 | C:0.236842                    | T:0.763158  |
| chr28 | 11298093 2 | 40 | C:0.75 T:0.25                 |             |
| chr28 | 11298219 2 | 36 | A:0.75 AG:0.25                |             |
| chr28 | 11298538 2 | 40 | C:0.75 T:0.25                 |             |
| chr28 | 11299765 2 | 38 | C:1 G:0                       |             |
| chr28 | 11299866 2 | 36 | G:0.972222                    | A:0.0277778 |
| chr28 | 11300176 2 | 38 | G:0 A:1                       |             |
| chr28 | 11300427 2 | 40 | A:0 G:1                       |             |
| chr28 | 11300494 2 | 40 | T:0 C:1                       |             |
| chr28 | 11300518 2 | 40 | A:0 G:1                       |             |
| chr28 | 11300531 2 | 40 | G:0 A:1                       |             |
| chr28 | 11300768 2 | 32 | T:0.03125                     | A:0.96875   |
| chr28 | 11300844 2 | 36 | C:0 T:1                       |             |
| chr28 | 11301654 2 | 38 | A:1 G:0                       |             |
| chr28 | 11301685 2 | 36 | GT:0.555556                   | G:0.444444  |
| chr28 | 11301776 2 | 32 | C:0.09375                     | CT:0.90625  |
| chr28 | 11301899 2 | 36 | C:0 T:1                       |             |
| chr28 | 11302619 2 | 36 | G:0.0277778                   | C:0.972222  |
| chr28 | 11302652 2 | 34 | TGGA:0 T:1                    |             |
| chr28 | 11302682 2 | 34 | G:0 A:1                       |             |
| chr28 | 11303627 2 | 38 | A:0.868421                    | G:0.131579  |
| chr28 | 11304834 2 | 34 | A:0 G:1                       |             |
| chr28 | 11304909 2 | 38 | C:0.868421                    | T:0.131579  |

|       |          |   |    |                   |             |                  |
|-------|----------|---|----|-------------------|-------------|------------------|
| chr28 | 11305037 | 2 | 40 | A:0               | C:1         |                  |
| chr28 | 11305299 | 2 | 38 | T:1               | G:0         |                  |
| chr28 | 11306387 | 2 | 36 | T:1               | C:0         |                  |
| chr28 | 11306726 | 2 | 30 | C:0.566667        |             | CT:0.433333      |
| chr28 | 11306894 | 2 | 34 | G:1               | A:0         |                  |
| chr28 | 11307128 | 2 | 40 | GT:0.975          | G:0.025     |                  |
| chr28 | 11309258 | 2 | 38 | C:1               | T:0         |                  |
| chr28 | 11310143 | 2 | 30 | T:1               | A:0         |                  |
| chr28 | 11310285 | 2 | 36 | G:1               | A:0         |                  |
| chr28 | 11311019 | 2 | 36 | A:1               | G:0         |                  |
| chr28 | 11311182 | 2 | 40 | GTTTT:0.025       |             | G:0.975          |
| chr28 | 11311220 | 2 | 34 | T:0.0294118       |             | C:0.970588       |
| chr28 | 11312459 | 3 | 36 | TA:0.75           | T:0.0833333 | TAA:<br>0.166667 |
| chr28 | 11312919 | 2 | 38 | A:0               | G:1         |                  |
| chr28 | 11313232 | 2 | 38 | C:0.947368        |             | A:0.0526316      |
| chr28 | 11313614 | 2 | 38 | T:1               | C:0         |                  |
| chr28 | 11315504 | 2 | 38 | C:0.131579        |             | G:0.868421       |
| chr28 | 11315778 | 2 | 36 | T:1               | C:0         |                  |
| chr28 | 11315830 | 2 | 38 | C:1               | A:0         |                  |
| chr28 | 11315919 | 2 | 36 | CG:1              | C:0         |                  |
| chr28 | 11315973 | 2 | 38 | CAG:1             | C:0         |                  |
| chr28 | 11316005 | 2 | 34 | C:1               | T:0         |                  |
| chr28 | 11316162 | 2 | 36 | A:0.888889        |             | C:0.111111       |
| chr28 | 11316269 | 2 | 38 | A:1               | G:0         |                  |
| chr28 | 11316475 | 2 | 34 | A:0.117647        |             | G:0.882353       |
| chr28 | 11316585 | 2 | 22 | G:0.136364        |             | C:0.863636       |
| chr28 | 11316604 | 2 | 20 | G:0.9             | A:0.1       |                  |
| chr28 | 11316863 | 2 | 28 | G:0.964286        |             | A:0.0357143      |
| chr28 | 11317055 | 2 | 40 | T:0.575           | C:0.425     |                  |
| chr28 | 11317197 | 2 | 36 | GGTCC:0.583333    |             | G:0.416667       |
| chr28 | 11317201 | 2 | 36 | CG:0.888889       |             | C:0.111111       |
| chr28 | 11317203 | 2 | 36 | TCCG:0.888889     |             | T:0.111111       |
| chr28 | 11317231 | 3 | 38 | GGTGGGCT:0.763158 |             | G:<br>0.184211   |
| chr28 | 11317313 | 2 | 40 | A:0.9             | G:0.1       |                  |
| chr28 | 11317402 | 2 | 30 | T:0.6             | A:0.4       |                  |
| chr28 | 11317421 | 2 | 34 | T:0.794118        |             | A:0.205882       |
| chr28 | 11317602 | 2 | 38 | C:0.868421        |             | T:0.131579       |
| chr28 | 11317604 | 2 | 38 | T:1               | TC:0        |                  |
| chr28 | 11317638 | 2 | 38 | TA:0.736842       |             | T:0.263158       |
| chr28 | 11317642 | 2 | 38 | A:0.315789        |             | T:0.684211       |
| chr28 | 11317686 | 2 | 30 | A:0.0666667       |             | AAG:0.933333     |
| chr28 | 11318037 | 2 | 30 | A:0.9             | G:0.1       |                  |
| chr28 | 11318059 | 2 | 30 | C:0.9             | T:0.1       |                  |
| chr28 | 11318401 | 2 | 30 | C:0.833333        |             | T:0.166667       |
| chr28 | 11318755 | 2 | 34 | C:0.882353        |             | T:0.117647       |
| chr28 | 11318974 | 2 | 28 | C:0.678571        |             | CT:0.321429      |
| chr28 | 11319198 | 2 | 32 | A:0.5             | T:0.5       |                  |
| chr28 | 11319289 | 2 | 38 | A:0.921053        |             | T:0.0789474      |
| chr28 | 11319292 | 2 | 38 | T:1               | A:0         |                  |
| chr28 | 11319395 | 2 | 34 | A:0.0294118       |             | G:0.970588       |
| chr28 | 11319487 | 2 | 40 | C:1               | G:0         |                  |
| chr28 | 11319777 | 2 | 38 | G:1               | A:0         |                  |

chr28 11320022 3 38 CTATATATATATATATA:0.131579  
C:0.473684 CTATATATATA:0.394737  
chr28 11320295 2 34 A:1 AT:0  
chr28 11320463 2 36 G:1 A:0  
chr28 11320692 2 38 A:1 AT:0  
chr28 11321220 3 38 CT:0.657895 C:0.105263  
CTT:0.236842  
chr28 11321302 2 38 T:0.0263158 G:0.973684  
chr28 11321615 2 36 A:1 AT:0  
chr28 11321688 2 32 G:0.875 C:0.125  
chr28 11321848 2 34 G:1 A:0  
chr28 11321885 2 34 G:1 A:0  
chr28 11321925 2 38 A:0.0263158 G:0.973684  
chr28 11322298 2 38 G:0.421053 A:0.578947  
chr28 11322475 2 36 T:0.944444 A:0.0555556  
chr28 11322736 2 38 T:1 G:0  
chr28 11323142 2 38 G:1 A:0  
chr28 11323350 2 40 G:1 C:0  
chr28 11323370 2 40 TGAG:0.85 T:0.15  
chr28 11324084 2 34 A:0.911765 T:0.0882353  
chr28 11324431 3 36 GT:0.888889 G:0.111111  
GTTTT:0  
chr28 11324732 2 34 T:1 C:0  
chr28 11325054 2 40 T:1 C:0  
chr28 11325291 2 38 C:0.868421 G:0.131579  
chr28 11325305 2 38 T:0.842105 G:0.157895  
chr28 11325854 2 40 A:0.35 G:0.65  
chr28 11326114 3 40 A:0.475  
ACAGACATATCATTAAAAAAAAAAAAAAAAAATTTTTTTTTTTT:0.325  
ACAGACATATCATTAAAAAAAAAAAAAAAAAATTTTTTTTTTTT:0.2  
chr28 11326177 2 36 A:0.916667 T:0.0833333  
chr28 11326221 2 40 T:1 G:0  
chr28 11326512 2 38 A:1 T:0  
chr28 11326707 2 36 C:0.972222 T:0.0277778  
chr28 11326756 2 38 A:1 C:0  
chr28 11326942 2 36 A:1 G:0  
chr28 11327080 2 40 G:1 A:0  
chr28 11327354 2 38 C:0.0263158 G:0.973684  
chr28 11327564 2 34 T:0.764706 G:0.235294  
chr28 11327848 2 32 T:0.90625 C:0.09375  
chr28 11327995 2 34 T:0.382353 A:0.617647  
chr28 11328012 2 34 T:0.882353 A:0.117647  
chr28 11328494 2 28 A:0.357143 T:0.642857  
chr28 11328539 2 26 C:0.384615 T:0.615385  
chr28 11329088 3 38 AT:1 A:0 ATT:0  
chr28 11329098 2 38 T:0.921053 TC:0.0789474  
chr28 11329128 2 38 C:1 CACAG:0  
chr28 11329135 2 38 A:0.947368 AG:0.0526316  
chr28 11329136 3 38 A:0.947368 AG:0.0526316  
G:0  
chr28 11329530 2 38 G:0.0263158 C:0.973684  
chr28 11329742 2 34 T:0.852941 A:0.147059  
chr28 11329922 2 30 G:0.9 GT:0.1  
chr28 11329945 2 18 G:0.388889 A:0.611111

|       |          |   |    |                          |                 |                |
|-------|----------|---|----|--------------------------|-----------------|----------------|
| chr28 | 11329971 | 2 | 26 | GTGTATATATATATATATATATA: | 1               | G:0            |
| chr28 | 11329973 | 2 | 36 | GTATATATATA:             | 0.833333        | G:             |
|       |          |   |    |                          |                 | 0.166667       |
| chr28 | 11330070 | 2 | 32 | T:1                      | C:0             |                |
| chr28 | 11330116 | 3 | 26 | GTT:0.423077             | G:0.153846      |                |
|       |          |   |    |                          |                 | GT:0.423077    |
| chr28 | 11330293 | 2 | 34 | G:0.352941               | A:0.647059      |                |
| chr28 | 11331216 | 2 | 38 | A:1                      | G:0             |                |
| chr28 | 11331797 | 2 | 40 | T:0.375                  | G:0.625         |                |
| chr28 | 11332333 | 2 | 38 | A:1                      | G:0             |                |
| chr28 | 11332587 | 2 | 36 | A:0.0555556              | AAAAAC:0.944444 |                |
| chr28 | 11332761 | 2 | 36 | G:1                      | A:0             |                |
| chr28 | 11333661 | 2 | 40 | G:0.025                  | GT:0.975        |                |
| chr28 | 11333686 | 2 | 36 | G:1                      | T:0             |                |
| chr28 | 11333928 | 2 | 40 | C:0.275                  | G:0.725         |                |
| chr28 | 11333938 | 2 | 40 | A:0.025                  | G:0.975         |                |
| chr28 | 11334020 | 2 | 34 | G:1                      | T:0             |                |
| chr28 | 11334067 | 2 | 38 | C:0.921053               | A:0.0789474     |                |
| chr28 | 11334948 | 2 | 36 | C:0.833333               | T:0.166667      |                |
| chr28 | 11335240 | 2 | 38 | G:1                      | C:0             |                |
| chr28 | 11335262 | 2 | 38 | A:0.894737               | T:0.105263      |                |
| chr28 | 11335382 | 2 | 40 | A:1                      | G:0             |                |
| chr28 | 11336565 | 2 | 40 | CT:0.875                 | C:0.125         |                |
| chr28 | 11337174 | 2 | 34 | C:1                      | T:0             |                |
| chr28 | 11337189 | 2 | 30 | G:1                      | A:0             |                |
| chr28 | 11337192 | 2 | 30 | T:0                      | C:1             |                |
| chr28 | 11338940 | 2 | 38 | G:1                      | C:0             |                |
| chr28 | 11338972 | 2 | 40 | T:1                      | C:0             |                |
| chr28 | 11338995 | 2 | 36 | G:1                      | GT:0            |                |
| chr28 | 11339013 | 2 | 36 | T:1                      | A:0             |                |
| chr28 | 11339016 | 2 | 32 | G:0.96875                | GATTT:0.03125   |                |
| chr28 | 11339345 | 2 | 34 | T:0.0588235              | C:0.941176      |                |
| chr28 | 11339675 | 2 | 34 | T:0.823529               | C:0.176471      |                |
| chr28 | 11340018 | 2 | 38 | AT:1                     | A:0             |                |
| chr28 | 11340028 | 2 | 38 | T:1                      | A:0             |                |
| chr28 | 11340268 | 2 | 40 | C:0.825                  | T:0.175         |                |
| chr28 | 11340368 | 2 | 30 | C:0.966667               | CT:0.0333333    |                |
| chr28 | 11340584 | 2 | 34 | A:1                      | G:0             |                |
| chr28 | 11340714 | 2 | 38 | C:1                      | T:0             |                |
| chr28 | 11340837 | 2 | 38 | G:0                      | GT:1            |                |
| chr28 | 11340842 | 2 | 38 | G:0                      | GT:1            |                |
| chr28 | 11341080 | 2 | 38 | A:1                      | C:0             |                |
| chr28 | 11342374 | 2 | 38 | A:0.526316               | G:0.473684      |                |
| chr28 | 11342516 | 2 | 40 | T:1                      | C:0             |                |
| chr28 | 11342528 | 2 | 40 | C:0.025                  | CCTCT:0.975     |                |
| chr28 | 11342901 | 2 | 34 | A:0.0588235              | G:0.941176      |                |
| chr28 | 11342943 | 2 | 32 | CTTT:0.4375              | C:0.5625        |                |
| chr28 | 11343133 | 2 | 40 | G:1                      | T:0             |                |
| chr28 | 11343752 | 3 | 40 | TTTTG:0.2                | T:0.575         |                |
|       |          |   |    |                          |                 | TTTTGTTG:0.225 |
| chr28 | 11343794 | 2 | 40 | G:0.9                    | A:0.1           |                |
| chr28 | 11345173 | 2 | 36 | C:0.861111               | CT:0.138889     |                |
| chr28 | 11345441 | 2 | 38 | G:1                      | A:0             |                |
| chr28 | 11345575 | 2 | 34 | T:1                      | A:0             |                |

|                               |          |   |    |                       |         |              |      |
|-------------------------------|----------|---|----|-----------------------|---------|--------------|------|
| chr28                         | 11345772 | 2 | 38 | A:1                   | G:0     |              |      |
| chr28                         | 11346071 | 3 | 36 | AT:0.555556           |         | A:0.111111   |      |
| ATT:0.333333                  |          |   |    |                       |         |              |      |
| chr28                         | 11346075 | 2 | 38 | T:0.894737            |         | A:0.105263   |      |
| chr28                         | 11346082 | 2 | 36 | T:0.972222            |         | A:0.0277778  |      |
| chr28                         | 11346252 | 2 | 36 | G:0                   | A:1     |              |      |
| chr28                         | 11346276 | 2 | 36 | G:0                   | A:1     |              |      |
| chr28                         | 11346283 | 2 | 36 | T:0                   | A:1     |              |      |
| chr28                         | 11346284 | 2 | 36 | G:0                   | A:1     |              |      |
| chr28                         | 11346293 | 2 | 36 | T:0                   | A:1     |              |      |
| chr28                         | 11346369 | 2 | 36 | CA:0                  | C:1     |              |      |
| chr28                         | 11346741 | 2 | 40 | G:1                   | A:0     |              |      |
| chr28                         | 11347334 | 2 | 36 | G:1                   | GT:0    |              |      |
| chr28                         | 11347473 | 2 | 38 | G:1                   | C:0     |              |      |
| chr28                         | 11347805 | 2 | 38 | G:1                   | T:0     |              |      |
| chr28                         | 11348225 | 2 | 34 | GT:1                  | G:0     |              |      |
| chr28                         | 11348241 | 2 | 34 | G:1                   | A:0     |              |      |
| chr28                         | 11348405 | 2 | 36 | T:0.0277778           |         | TTC:0.972222 |      |
| chr28                         | 11348569 | 2 | 38 | CAG:1                 | C:0     |              |      |
| chr28                         | 11349440 | 2 | 38 | A:1                   | G:0     |              |      |
| chr28                         | 11349578 | 2 | 36 | G:1                   | A:0     |              |      |
| chr28                         | 11350096 | 2 | 38 | T:0.973684            |         | A:0.0263158  |      |
| chr28                         | 11350268 | 2 | 36 | T:1                   | TTGTG:0 |              |      |
| chr28                         | 11350327 | 2 | 36 | G:1                   | GT:0    |              |      |
| chr28                         | 11350916 | 2 | 34 | A:0.323529            |         | G:0.676471   |      |
| chr28                         | 11351877 | 2 | 40 | G:1                   | C:0     |              |      |
| chr28                         | 11352296 | 2 | 36 | C:1                   | T:0     |              |      |
| chr28                         | 11352433 | 4 | 38 | CTT:0.684211          |         | C:0.0263158  |      |
| CTTT:0.236842 CTTTT:0.0526316 |          |   |    |                       |         |              |      |
| chr28                         | 11353222 | 2 | 36 | T:1                   | C:0     |              |      |
| chr28                         | 11353570 | 2 | 34 | T:0.0294118           |         | C:0.970588   |      |
| chr28                         | 11353951 | 2 | 34 | A:1                   | AG:0    |              |      |
| chr28                         | 11353954 | 3 | 34 | G:0.0294118           |         | GT:0.941176  |      |
| GTT:0.0294118                 |          |   |    |                       |         |              |      |
| chr28                         | 11354007 | 3 | 34 | TGTGTGGGGGGG:0.588235 |         | T:0          |      |
| TGG:0.411765                  |          |   |    |                       |         |              |      |
| chr28                         | 11354009 | 2 | 38 | TGTGGGGGGG:1          |         | T:0          |      |
| chr28                         | 11354011 | 2 | 36 | TGGGGGGG:0.638889     |         | T:           |      |
| 0.361111                      |          |   |    |                       |         |              |      |
| chr28                         | 11354189 | 2 | 34 | T:1                   | C:0     |              |      |
| chr28                         | 11355172 | 2 | 40 | C:1                   | A:0     |              |      |
| chr28                         | 11355407 | 3 | 40 | CT:0.175              | C:0.625 | CTT:0.2      |      |
| chr28                         | 11356045 | 2 | 34 | G:1                   | A:0     |              |      |
| chr28                         | 11356881 | 3 | 38 | GAA:0.263158          |         | G:0.0263158  |      |
| GA:0.710526                   |          |   |    |                       |         |              |      |
| chr28                         | 11358289 | 3 | 36 | TA:0.277778           |         | T:0.722222   |      |
| TAA:0                         |          |   |    |                       |         |              |      |
| chr28                         | 11358300 | 2 | 40 | A:1                   | C:0     |              |      |
| chr28                         | 11358751 | 2 | 38 | T:0.763158            |         | A:0.236842   |      |
| chr28                         | 11358783 | 2 | 38 | T:0.947368            |         | C:0.0526316  |      |
| chr28                         | 11358785 | 2 | 38 | C:1                   | T:0     |              |      |
| chr28                         | 11358995 | 2 | 38 | A:1                   | T:0     |              |      |
| chr28                         | 11359571 | 2 | 40 | T:0.9                 | A:0.1   |              |      |
| chr28                         | 11359911 | 3 | 32 | CT:0.71875            |         | C:0.1875     | CTT: |

0.09375

|             |            |    |              |         |              |
|-------------|------------|----|--------------|---------|--------------|
| chr28       | 11360031 2 | 40 | A:0.975      | G:0.025 |              |
| chr28       | 11360684 2 | 36 | C:0          | T:1     |              |
| chr28       | 11360703 2 | 36 | TTGAC:1      | T:0     |              |
| chr28       | 11360990 2 | 34 | G:1          | C:0     |              |
| chr28       | 11361323 2 | 34 | C:1          | T:0     |              |
| chr28       | 11361862 2 | 38 | A:1          | T:0     |              |
| chr28       | 11361867 2 | 38 | A:1          | G:0     |              |
| chr28       | 11362406 2 | 36 | A:0.861111   |         | G:0.138889   |
| chr28       | 11362523 2 | 38 | A:1          | G:0     |              |
| chr28       | 11362701 2 | 40 | T:1          | C:0     |              |
| chr28       | 11362897 2 | 38 | A:0.447368   |         | G:0.552632   |
| chr28       | 11362904 2 | 38 | CAT:0.973684 |         | C:0.0263158  |
| chr28       | 11363289 2 | 40 | T:1          | C:0     |              |
| chr28       | 11363460 2 | 36 | CT:0.805556  |         | C:0.194444   |
| chr28       | 11363642 2 | 38 | T:0.0263158  |         | C:0.973684   |
| chr28       | 11363936 2 | 38 | A:0.894737   |         | C:0.105263   |
| chr28       | 11363960 2 | 36 | G:1          | A:0     |              |
| chr28       | 11364022 2 | 38 | T:1          | C:0     |              |
| chr28       | 11364054 2 | 40 | TAAA:1       | T:0     |              |
| chr28       | 11364938 2 | 38 | C:1          | T:0     |              |
| chr28       | 11365347 2 | 38 | T:1          | C:0     |              |
| chr28       | 11366535 2 | 40 | A:0.775      | T:0.225 |              |
| chr28       | 11367224 2 | 38 | A:1          | G:0     |              |
| chr28       | 11367266 2 | 40 | G:1          | A:0     |              |
| chr28       | 11367613 2 | 38 | G:0.0263158  |         | A:0.973684   |
| chr28       | 11368188 2 | 38 | G:1          | C:0     |              |
| chr28       | 11368883 2 | 38 | G:1          | A:0     |              |
| chr28       | 11368930 2 | 40 | G:1          | A:0     |              |
| chr28       | 11369634 2 | 36 | C:1          | T:0     |              |
| chr28       | 11369698 2 | 36 | A:0.916667   |         | G:0.0833333  |
| chr28       | 11369707 2 | 36 | C:1          | T:0     |              |
| chr28       | 11369865 2 | 36 | C:1          | A:0     |              |
| chr28       | 11369931 2 | 38 | T:0.0526316  |         | TAC:0.947368 |
| chr28       | 11370083 2 | 40 | G:0.325      | T:0.675 |              |
| chr28       | 11370174 2 | 36 | C:0.416667   |         | T:0.583333   |
| chr28       | 11370406 2 | 38 | G:1          | C:0     |              |
| chr28       | 11370827 2 | 38 | TTC:0.736842 |         | T:0.263158   |
| chr28       | 11370879 3 | 32 | CA:0.3125    |         | C:0.28125    |
| CAA:0.40625 |            |    |              |         |              |
| chr28       | 11371043 2 | 36 | T:0.75       | A:0.25  |              |
| chr28       | 11372112 2 | 40 | T:1          | A:0     |              |
| chr28       | 11372115 2 | 40 | A:1          | AT:0    |              |
| chr28       | 11372357 2 | 38 | G:1          | A:0     |              |
| chr28       | 11372999 2 | 36 | G:1          | A:0     |              |
| chr28       | 11373109 2 | 32 | A:1          | G:0     |              |
| chr28       | 11373317 2 | 34 | A:0.735294   |         | AT:0.264706  |
| chr28       | 11373539 2 | 36 | G:1          | A:0     |              |
| chr28       | 11373568 2 | 36 | G:1          | A:0     |              |
| chr28       | 11374137 2 | 34 | C:0.764706   |         | T:0.235294   |
| chr28       | 11374318 2 | 40 | G:1          | A:0     |              |
| chr28       | 11375016 2 | 40 | T:0          | A:1     |              |
| chr28       | 11375064 2 | 38 | T:1          | C:0     |              |
| chr28       | 11375204 2 | 36 | C:0.75       | CT:0.25 |              |

|                                                               |            |    |                         |                     |
|---------------------------------------------------------------|------------|----|-------------------------|---------------------|
| chr28                                                         | 11375257 2 | 38 | CAG:0.973684            | C:0.0263158         |
| chr28                                                         | 11376138 2 | 34 | G:1 A:0                 |                     |
| chr28                                                         | 11376448 2 | 34 | A:1 T:0                 |                     |
| chr28                                                         | 11376449 2 | 32 | C:0.625 T:0.375         |                     |
| chr28                                                         | 11376645 2 | 38 | C:1 T:0                 |                     |
| chr28                                                         | 11377176 2 | 36 | C:0.0277778             | T:0.972222          |
| chr28                                                         | 11377785 2 | 38 | GA:1 G:0                |                     |
| chr28                                                         | 11377847 2 | 32 | T:0.03125               | C:0.96875           |
| chr28                                                         | 11377911 2 | 36 | G:1 A:0                 |                     |
| chr28                                                         | 11377940 2 | 34 | GAT:1 G:0               |                     |
| chr28                                                         | 11378893 2 | 24 | GT:0.375 G:0.625        |                     |
| chr28                                                         | 11379024 2 | 36 | C:0.861111              | T:0.138889          |
| chr28                                                         | 11380042 3 | 40 | G:0.875                 |                     |
| GCCAAATAGTCTTTTTATTTTTTTTTTTTTATTTTTTTATTTTTTTATTTTTTTT:0.025 |            |    |                         |                     |
| GCCAAATAGTCTTTTTATTTTTTTTTTTTTATTTTTTTATTTTTTTT:0.1           |            |    |                         |                     |
| chr28                                                         | 11380061 2 | 38 | C:1 T:0                 |                     |
| chr28                                                         | 11380180 2 | 36 | C:0.777778              | CT:0.222222         |
| chr28                                                         | 11380262 2 | 38 | A:0.447368              | G:0.552632          |
| chr28                                                         | 11380346 2 | 40 | TAA:0.725               | T:0.275             |
| chr28                                                         | 11380606 2 | 40 | G:1 GTTTAGTAACA:0       |                     |
| chr28                                                         | 11380786 2 | 36 | TG:0.888889             | T:0.111111          |
| chr28                                                         | 11381145 3 | 32 | A:0.0625 ATT:0.34375    | ATTAT:0.59375       |
| chr28                                                         | 11381146 2 | 32 | A:1 T:0                 |                     |
| chr28                                                         | 11381457 3 | 38 | CTTAT:0.736842          | C:0.236842          |
| CTTATTTAT:0.0263158                                           |            |    |                         |                     |
| chr28                                                         | 11381771 2 | 38 | C:0.0263158             | T:0.973684          |
| chr28                                                         | 11381789 2 | 36 | G:1 A:0                 |                     |
| chr28                                                         | 11381828 2 | 36 | C:1 A:0                 |                     |
| chr28                                                         | 11382448 2 | 38 | G:1 A:0                 |                     |
| chr28                                                         | 11382674 2 | 36 | C:0 T:1                 |                     |
| chr28                                                         | 11382703 2 | 36 | G:1 A:0                 |                     |
| chr28                                                         | 11382784 2 | 36 | C:0.638889              | CT:0.361111         |
| chr28                                                         | 11382796 2 | 36 | C:0.583333              | CT:0.416667         |
| chr28                                                         | 11382890 2 | 36 | A:1 G:0                 |                     |
| chr28                                                         | 11382915 2 | 34 | CG:0.323529             | C:0.676471          |
| chr28                                                         | 11382929 2 | 34 | C:0.323529              | T:0.676471          |
| chr28                                                         | 11383210 2 | 32 | C:1 T:0                 |                     |
| chr28                                                         | 11384031 2 | 32 | C:1 A:0                 |                     |
| chr28                                                         | 11384336 2 | 38 | T:1 C:0                 |                     |
| chr28                                                         | 11384435 3 | 36 | GTTTTTTTTTTTTT:0.472222 | G:0.277778 GTT:0.25 |
| chr28                                                         | 11384574 2 | 32 | G:1 A:0                 |                     |
| chr28                                                         | 11384657 2 | 32 | C:0.90625               | A:0.09375           |
| chr28                                                         | 11385087 2 | 36 | C:0.0277778             | T:0.972222          |
| chr28                                                         | 11385266 2 | 36 | C:1 T:0                 |                     |
| chr28                                                         | 11385325 2 | 32 | G:1 A:0                 |                     |
| chr28                                                         | 11385610 2 | 32 | C:0.0625 T:0.9375       |                     |
| chr28                                                         | 11385832 2 | 36 | CA:0.0277778            | C:0.972222          |
| chr28                                                         | 11385878 2 | 38 | G:1 A:0                 |                     |
| chr28                                                         | 11386115 2 | 36 | C:1 T:0                 |                     |
| chr28                                                         | 11386490 2 | 36 | T:0.388889              | A:0.611111          |
| chr28                                                         | 11386521 2 | 38 | T:1 G:0                 |                     |
| chr28                                                         | 11386861 3 | 36 | TAA:0.5 T:0.0555556     | TA:                 |

|                                   |            |    |                           |
|-----------------------------------|------------|----|---------------------------|
| 0.444444                          |            |    |                           |
| chr28                             | 11387684 2 | 38 | T:1 G:0                   |
| chr28                             | 11387819 2 | 38 | ATGATTTTAAT:0.973684 A:   |
| 0.0263158                         |            |    |                           |
| chr28                             | 11388558 2 | 30 | TA:0.733333 T:0.266667    |
| chr28                             | 11388762 2 | 34 | G:0.441176 A:0.558824     |
| chr28                             | 11388982 2 | 34 | A:0.852941 G:0.147059     |
| chr28                             | 11389436 2 | 40 | C:1 CT:0                  |
| chr28                             | 11389806 2 | 40 | C:0.9 T:0.1               |
| chr28                             | 11390211 2 | 38 | G:0.921053 A:0.0789474    |
| chr28                             | 11390298 2 | 38 | G:0.0263158 A:0.973684    |
| chr28                             | 11390661 2 | 40 | CTT:0.375 C:0.625         |
| chr28                             | 11390684 2 | 40 | C:1 A:0                   |
| chr28                             | 11391337 2 | 38 | G:1 A:0                   |
| chr28                             | 11392149 2 | 36 | G:1 A:0                   |
| chr28                             | 11392155 2 | 36 | C:1 T:0                   |
| chr28                             | 11392243 2 | 38 | GTGAAAT:1 G:0             |
| chr28                             | 11392462 2 | 40 | GAC:1 G:0                 |
| chr28                             | 11393180 2 | 36 | G:0.138889 GT:0.861111    |
| chr28                             | 11393771 2 | 38 | G:0.921053                |
| GAGAGAGAGAGAGAGAGAGAGAA:0.0789474 |            |    |                           |
| chr28                             | 11393782 2 | 24 | A:0.666667 AG:0.333333    |
| chr28                             | 11393783 3 | 38 | A:0.657895 AG:0.315789    |
| AGAGAGAGAAAGAG:0.0263158          |            |    |                           |
| chr28                             | 11393791 2 | 30 | A:0.8 AAGAG:0.2           |
| chr28                             | 11393795 2 | 32 | GAGAA:0.59375 G:0.40625   |
| chr28                             | 11393845 2 | 38 | G:0.921053 GAA:0.0789474  |
| chr28                             | 11393846 2 | 36 | AG:0.222222 A:0.777778    |
| chr28                             | 11393849 2 | 36 | A:1 AAG:0                 |
| chr28                             | 11393850 3 | 38 | A:0.263158 G:0.736842     |
| AG:0                              |            |    |                           |
| chr28                             | 11393870 2 | 38 | GA:1 G:0                  |
| chr28                             | 11393942 2 | 30 | T:0.633333 TTA:0.366667   |
| chr28                             | 11393957 2 | 36 | TA:0.916667 T:0.0833333   |
| chr28                             | 11393959 2 | 38 | T:0.868421 TATA:0.131579  |
| chr28                             | 11394662 2 | 32 | G:1 A:0                   |
| chr28                             | 11395143 2 | 38 | A:1 T:0                   |
| chr28                             | 11395453 2 | 38 | C:1 T:0                   |
| chr28                             | 11395604 3 | 34 | CTT:0.705882 C:0.0294118  |
| TTT:0.264706                      |            |    |                           |
| chr28                             | 11395984 2 | 36 | C:1 T:0                   |
| chr28                             | 11396231 2 | 38 | G:0.0263158 T:0.973684    |
| chr28                             | 11396469 2 | 36 | C:0.361111 T:0.638889     |
| chr28                             | 11396726 2 | 38 | T:1 C:0                   |
| chr28                             | 11396729 2 | 38 | A:1 G:0                   |
| chr28                             | 11396817 2 | 34 | C:1 T:0                   |
| chr28                             | 11396858 2 | 32 | C:1 A:0                   |
| chr28                             | 11397076 2 | 40 | G:1 A:0                   |
| chr28                             | 11397620 2 | 38 | GTT:0.0789474 G:0.921053  |
| chr28                             | 11397684 2 | 36 | AAGAG:0.388889 A:0.611111 |
| chr28                             | 11397748 2 | 30 | A:0.0333333 G:0.966667    |
| chr28                             | 11397771 2 | 30 | C:0.833333 T:0.166667     |
| chr28                             | 11398479 2 | 38 | T:0.263158 C:0.736842     |
| chr28                             | 11398842 2 | 38 | G:1 A:0                   |



|                       |          |   |    |                   |             |  |
|-----------------------|----------|---|----|-------------------|-------------|--|
| chr28                 | 11399261 | 2 | 38 | T:1               | C:0         |  |
| chr28                 | 11399472 | 2 | 36 | C:1               | T:0         |  |
| chr28                 | 11400792 | 2 | 40 | A:0.025           | T:0.975     |  |
| chr28                 | 11401721 | 2 | 38 | G:0.289474        | A:0.710526  |  |
| chr28                 | 11401844 | 2 | 36 | G:1               | A:0         |  |
| chr28                 | 11401962 | 2 | 38 | G:0.842105        | A:0.157895  |  |
| chr28                 | 11402177 | 2 | 38 | C:0.736842        | A:0.263158  |  |
| chr28                 | 11402263 | 2 | 38 | C:1               | T:0         |  |
| chr28                 | 11402468 | 2 | 36 | G:0.916667        | T:0.0833333 |  |
| chr28                 | 11402469 | 2 | 36 | A:0.916667        | T:0.0833333 |  |
| chr28                 | 11402596 | 2 | 38 | T:1               | C:0         |  |
| chr28                 | 11402600 | 3 | 40 | CCTCTCTCTCT:0.475 | C:0.35      |  |
| CCTCTCTCTCTCTCT:0.175 |          |   |    |                   |             |  |
| chr28                 | 11402645 | 2 | 26 | TA:0.5            | T:0.5       |  |
| chr28                 | 11402796 | 2 | 36 | C:0.75            | T:0.25      |  |
| chr28                 | 11403468 | 2 | 34 | C:0.735294        | T:0.264706  |  |
| chr28                 | 11403533 | 2 | 38 | A:1               | G:0         |  |
| chr28                 | 11403536 | 2 | 38 | T:0.710526        | C:0.289474  |  |
| chr28                 | 11404631 | 2 | 32 | T:0.03125         | C:0.96875   |  |
| chr28                 | 11404670 | 2 | 36 | A:0.722222        | C:0.277778  |  |
| chr28                 | 11404882 | 2 | 36 | G:0               | C:1         |  |
| chr28                 | 11406064 | 2 | 38 | C:0.815789        | T:0.184211  |  |
| chr28                 | 11406676 | 2 | 34 | T:0.911765        | C:0.0882353 |  |
| chr28                 | 11406697 | 2 | 34 | T:0.323529        | A:0.676471  |  |
| chr28                 | 11406738 | 2 | 30 | AT:0.0333333      | A:0.966667  |  |
| chr28                 | 11406755 | 2 | 32 | G:0.28125         | A:0.71875   |  |
| chr28                 | 11406933 | 2 | 36 | G:0.888889        | A:0.111111  |  |
| chr28                 | 11406993 | 2 | 32 | T:0.03125         | C:0.96875   |  |
| chr28                 | 11407521 | 2 | 38 | G:0.0263158       | GT:0.973684 |  |
| chr28                 | 11407834 | 2 | 30 | G:1               | A:0         |  |
| chr28                 | 11409745 | 2 | 32 | T:0.25            | C:0.75      |  |
| chr28                 | 11410506 | 2 | 32 | T:1               | C:0         |  |
| chr28                 | 11410817 | 2 | 38 | G:1               | C:0         |  |
| chr28                 | 11410823 | 2 | 38 | AT:0.315789       | A:0.684211  |  |
| chr28                 | 11411325 | 2 | 34 | G:0.764706        | A:0.235294  |  |
| chr28                 | 11411580 | 2 | 38 | C:0.5             | A:0.5       |  |
| chr28                 | 11411684 | 2 | 32 | G:0.375           | A:0.625     |  |
| chr28                 | 11411741 | 2 | 38 | T:0.263158        | C:0.736842  |  |
| chr28                 | 11411795 | 2 | 36 | A:1               | G:0         |  |
| chr28                 | 11411861 | 2 | 40 | T:0.375           | C:0.625     |  |
| chr28                 | 11411938 | 2 | 36 | C:0.777778        | T:0.222222  |  |
| chr28                 | 11411995 | 2 | 36 | CCCA:0.305556     | C:0.694444  |  |
| chr28                 | 11412144 | 2 | 36 | A:0.333333        | C:0.666667  |  |
| chr28                 | 11412181 | 2 | 38 | T:0.342105        | G:0.657895  |  |
| chr28                 | 11412203 | 2 | 38 | C:0.342105        | T:0.657895  |  |
| chr28                 | 11412265 | 2 | 40 | T:0.925           | C:0.075     |  |
| chr28                 | 11412370 | 2 | 40 | C:0.575           | T:0.425     |  |
| chr28                 | 11412429 | 2 | 38 | G:1               | A:0         |  |
| chr28                 | 11412463 | 2 | 32 | A:0.0625          | G:0.9375    |  |
| chr28                 | 11412904 | 2 | 36 | C:0.611111        | T:0.388889  |  |
| chr28                 | 11412963 | 2 | 38 | A:0.368421        | C:0.631579  |  |
| chr28                 | 11413178 | 2 | 36 | A:0.277778        | G:0.722222  |  |
| chr28                 | 11413588 | 2 | 38 | T:0.368421        | C:0.631579  |  |
| chr28                 | 11413779 | 2 | 34 | G:0.264706        | C:0.735294  |  |

|       |            |    |                   |               |
|-------|------------|----|-------------------|---------------|
| chr28 | 11415240 2 | 38 | C:0.842105        | T:0.157895    |
| chr28 | 11415441 2 | 38 | G:1 GC:0          |               |
| chr28 | 11415479 2 | 40 | G:1 A:0           |               |
| chr28 | 11415635 2 | 36 | C:1 A:0           |               |
| chr28 | 11415710 2 | 36 | C:0.194444        | T:0.805556    |
| chr28 | 11416137 2 | 38 | T:0.210526        | G:0.789474    |
| chr28 | 11416184 2 | 38 | C:1 T:0           |               |
| chr28 | 11416385 2 | 38 | C:0.289474        | T:0.710526    |
| chr28 | 11416393 2 | 38 | A:0.289474        | G:0.710526    |
| chr28 | 11416421 2 | 40 | C:0.325 T:0.675   |               |
| chr28 | 11416931 2 | 40 | G:0.775 A:0.225   |               |
| chr28 | 11417125 2 | 36 | C:0.25 A:0.75     |               |
| chr28 | 11417144 2 | 38 | C:0.315789        | G:0.684211    |
| chr28 | 11417358 2 | 32 | G:0.15625         | A:0.84375     |
| chr28 | 11417380 2 | 34 | T:0.294118        | C:0.705882    |
| chr28 | 11417401 2 | 36 | G:0.277778        | T:0.722222    |
| chr28 | 11417573 2 | 36 | C:1 T:0           |               |
| chr28 | 11417577 2 | 36 | A:0.25 G:0.75     |               |
| chr28 | 11417769 2 | 38 | C:1 T:0           |               |
| chr28 | 11418418 2 | 38 | C:0.894737        | CTTA:0.105263 |
| chr28 | 11418658 2 | 32 | G:0.90625         | A:0.09375     |
| chr28 | 11418862 2 | 30 | C:0.233333        | T:0.766667    |
| chr28 | 11419163 2 | 18 | G:0.0555556       | A:0.944444    |
| chr28 | 11419363 2 | 12 | A:0.583333        | T:0.416667    |
| chr28 | 11420115 2 | 28 | C:0.0357143       | G:0.964286    |
| chr28 | 11420140 2 | 26 | G:0.692308        | A:0.307692    |
| chr28 | 11420191 2 | 26 | A:0.346154        | T:0.653846    |
| chr28 | 11420278 2 | 24 | G:0.708333        | A:0.291667    |
| chr28 | 11420342 2 | 24 | G:1 GC:0          |               |
| chr28 | 11420347 2 | 22 | G:0 GC:1          |               |
| chr28 | 11420354 2 | 22 | C:0 T:1           |               |
| chr28 | 11420399 2 | 24 | AC:0 A:1          |               |
| chr28 | 11420410 2 | 24 | C:0 T:1           |               |
| chr28 | 11420543 2 | 28 | C:0.0714286       | G:0.928571    |
| chr28 | 11420689 2 | 28 | T:0.821429        | A:0.178571    |
| chr28 | 11421086 2 | 32 | C:0.6875 T:0.3125 |               |
| chr28 | 11421306 2 | 36 | C:0.0277778       | G:0.972222    |
| chr28 | 11421383 2 | 36 | C:0.388889        | T:0.611111    |
| chr28 | 11421567 2 | 36 | T:0.611111        | C:0.388889    |
| chr28 | 11421735 2 | 36 | C:0.0555556       | A:0.944444    |
| chr28 | 11421942 2 | 38 | T:0.105263        | C:0.894737    |
| chr28 | 11422206 2 | 34 | G:0.0882353       | A:0.911765    |
| chr28 | 11422385 2 | 34 | CT:1 C:0          |               |
| chr28 | 11422386 2 | 34 | T:0.0588235       | C:0.941176    |
| chr28 | 11422387 2 | 34 | G:1 C:0           |               |
| chr28 | 11422461 2 | 36 | G:0.444444        | A:0.555556    |
| chr28 | 11422483 2 | 36 | G:0.638889        | A:0.361111    |
| chr28 | 11422662 2 | 34 | G:1 C:0           |               |
| chr28 | 11422677 2 | 34 | C:0.647059        | T:0.352941    |
| chr28 | 11422834 2 | 38 | C:1 G:0           |               |
| chr28 | 11423120 2 | 34 | G:0.147059        | A:0.852941    |
| chr28 | 11423200 2 | 34 | G:0.529412        | A:0.470588    |
| chr28 | 11423349 2 | 34 | G:0.588235        | A:0.411765    |
| chr28 | 11423590 2 | 34 | G:0.0588235       | A:0.941176    |

|                |            |    |                   |            |              |
|----------------|------------|----|-------------------|------------|--------------|
| chr28          | 11424170 2 | 40 | C:0.1             | CT:0.9     |              |
| chr28          | 11424205 2 | 38 | C:0.815789        |            | T:0.184211   |
| chr28          | 11424287 2 | 38 | T:1               | TG:0       |              |
| chr28          | 11424305 2 | 36 | C:0.5             | T:0.5      |              |
| chr28          | 11424429 3 | 30 | ATTTTTTT:0.666667 |            | A:0.2        |
| ATTTT:0.133333 |            |    |                   |            |              |
| chr28          | 11424609 2 | 36 | C:0.75            | G:0.25     |              |
| chr28          | 11424683 2 | 30 | T:0.7             | TTGAAC:0.3 |              |
| chr28          | 11424708 2 | 32 | C:0.84375         |            | T:0.15625    |
| chr28          | 11424721 2 | 32 | T:0.59375         |            | C:0.40625    |
| chr28          | 11424818 2 | 34 | C:0.823529        |            | T:0.176471   |
| chr28          | 11424884 2 | 30 | C:0.733333        |            | T:0.266667   |
| chr28          | 11425255 2 | 38 | C:0.868421        |            | T:0.131579   |
| chr28          | 11425269 2 | 38 | T:0.342105        |            | C:0.657895   |
| chr28          | 11425339 2 | 40 | G:0.85            | C:0.15     |              |
| chr28          | 11425346 2 | 40 | G:0.75            | A:0.25     |              |
| chr28          | 11425922 2 | 38 | G:0.815789        |            | T:0.184211   |
| chr28          | 11425958 2 | 36 | A:0.888889        |            | C:0.111111   |
| chr28          | 11426016 2 | 36 | A:0.861111        |            | AT:0.138889  |
| chr28          | 11426159 2 | 40 | A:0.875           | G:0.125    |              |
| chr28          | 11426266 2 | 34 | G:0.617647        |            | A:0.382353   |
| chr28          | 11426282 2 | 32 | T:0.8125          | C:0.1875   |              |
| chr28          | 11426438 2 | 32 | T:0.84375         |            | A:0.15625    |
| chr28          | 11426621 2 | 36 | A:0.527778        |            | G:0.472222   |
| chr28          | 11426737 2 | 38 | A:0.921053        |            | C:0.0789474  |
| chr28          | 11426791 2 | 36 | T:0.888889        |            | C:0.111111   |
| chr28          | 11427406 2 | 36 | A:0.722222        |            | C:0.277778   |
| chr28          | 11427446 2 | 34 | G:0.617647        |            | A:0.382353   |
| chr28          | 11427512 2 | 38 | T:0.947368        |            | G:0.0526316  |
| chr28          | 11427715 2 | 34 | C:0.882353        |            | T:0.117647   |
| chr28          | 11427820 2 | 40 | G:0.7             | T:0.3      |              |
| chr28          | 11427838 2 | 40 | T:0.725           | C:0.275    |              |
| chr28          | 11427908 2 | 32 | C:1               | A:0        |              |
| chr28          | 11428001 2 | 32 | G:0.75            | C:0.25     |              |
| chr28          | 11428014 2 | 38 | C:0.789474        |            | T:0.210526   |
| chr28          | 11428071 2 | 36 | T:0.583333        |            | C:0.416667   |
| chr28          | 11428105 2 | 34 | T:0.794118        |            | G:0.205882   |
| chr28          | 11428263 2 | 36 | A:0.805556        |            | G:0.194444   |
| chr28          | 11428386 2 | 38 | A:0.868421        |            | G:0.131579   |
| chr28          | 11428887 2 | 40 | T:1               | C:0        |              |
| chr28          | 11428889 2 | 40 | A:0.775           | G:0.225    |              |
| chr28          | 11428965 2 | 36 | A:0.527778        |            | C:0.472222   |
| chr28          | 11429020 2 | 38 | A:1               | G:0        |              |
| chr28          | 11429207 2 | 38 | GTT:1             | G:0        |              |
| chr28          | 11429220 2 | 40 | C:0.775           | T:0.225    |              |
| chr28          | 11429733 2 | 38 | A:0.5             | T:0.5      |              |
| chr28          | 11429844 2 | 38 | G:0.973684        |            | A:0.0263158  |
| chr28          | 11429874 2 | 36 | A:0.472222        |            | G:0.527778   |
| chr28          | 11429887 2 | 38 | C:0.763158        |            | CTT:0.236842 |
| chr28          | 11430082 2 | 38 | A:0.447368        |            | T:0.552632   |
| chr28          | 11430108 2 | 38 | C:0.394737        |            | T:0.605263   |
| chr28          | 11430770 2 | 36 | A:1               | C:0        |              |
| chr28          | 11431115 2 | 36 | T:0.75            | C:0.25     |              |
| chr28          | 11431529 2 | 38 | G:0.631579        |            | C:0.368421   |

|       |             |   |               |                 |                  |
|-------|-------------|---|---------------|-----------------|------------------|
| chr28 | 11431632    | 2 | 36            | A:0.805556      | G:0.194444       |
| chr28 | 11431899    | 2 | 40            | G:1 A:0         |                  |
| chr28 | 11432698    | 2 | 36            | T:1 A:0         |                  |
| chr28 | 11432793    | 2 | 38            | C:0.605263      | T:0.394737       |
| chr28 | 11432958    | 2 | 38            | TA:0.815789     | T:0.184211       |
| chr28 | 11433004    | 2 | 38            | C:0.605263      | T:0.394737       |
| chr28 | 11433034    | 2 | 38            | C:0.973684      | G:0.0263158      |
| chr28 | 11433414    | 2 | 36            | T:0.805556      | TAAACAA:0.194444 |
| chr28 | 11434096    | 2 | 34            | CTTTT:0.735294  | C:0.264706       |
| chr28 | 11434131    | 2 | 36            | T:0.694444      | C:0.305556       |
| chr28 | 11434149    | 2 | 38            | G:0.763158      | A:0.236842       |
| chr28 | 11434291    | 2 | 40            | A:0.8 C:0.2     |                  |
| chr28 | 11434368    | 2 | 40            | G:0.45 A:0.55   |                  |
| chr28 | 11434415    | 2 | 36            | G:0.833333      | A:0.166667       |
| chr28 | 11434527    | 2 | 38            | A:0.789474      | G:0.210526       |
| chr28 | 11434650    | 2 | 26            | T:0.807692      | TGTG:0.192308    |
| chr28 | 11435664    | 2 | 34            | G:0.676471      | A:0.323529       |
| chr28 | 11435675    | 2 | 34            | G:0.676471      | T:0.323529       |
| chr28 | 11435691    | 2 | 32            | C:1 T:0         |                  |
| chr28 | 11435692    | 2 | 32            | G:1 T:0         |                  |
| chr28 | 11435780    | 2 | 40            | G:0.725 C:0.275 |                  |
| chr28 | 11436332    | 2 | 34            | G:0.852941      | A:0.147059       |
| chr28 | 11436376    | 2 | 34            | A:0.0294118     | G:0.970588       |
| chr28 | 11436526    | 5 | 40            | GGA:0.325       | G:0.025 GGAGA:   |
| 0.25  | GGAGAGA:0.1 |   | GGAGAGAGA:0.3 |                 |                  |
| chr28 | 11436632    | 2 | 36            | C:0.611111      | T:0.388889       |
| chr28 | 11436634    | 2 | 36            | G:0.805556      | A:0.194444       |
| chr28 | 11436761    | 2 | 36            | C:1 T:0         |                  |
| chr28 | 11436807    | 2 | 32            | T:0.78125       | C:0.21875        |
| chr28 | 11436968    | 2 | 40            | G:1 A:0         |                  |
| chr28 | 11437489    | 2 | 40            | A:0.85 C:0.15   |                  |
| chr28 | 11437610    | 2 | 34            | T:0.0294118     | C:0.970588       |
| chr28 | 11437708    | 2 | 38            | C:0.631579      | A:0.368421       |
| chr28 | 11438036    | 2 | 34            | C:0.647059      | T:0.352941       |
| chr28 | 11438150    | 2 | 38            | CT:0.0263158    | C:0.973684       |
| chr28 | 11438221    | 2 | 34            | T:0.441176      | C:0.558824       |
| chr28 | 11438900    | 2 | 34            | G:0.529412      | A:0.470588       |
| chr28 | 11439207    | 2 | 34            | C:0.735294      | T:0.264706       |
| chr28 | 11439218    | 2 | 30            | T:0.366667      | C:0.633333       |
| chr28 | 11439221    | 2 | 32            | G:0.625 T:0.375 |                  |
| chr28 | 11439498    | 2 | 36            | C:0.916667      | T:0.0833333      |
| chr28 | 11439553    | 2 | 36            | C:1 T:0         |                  |
| chr28 | 11439861    | 2 | 38            | A:0.5 C:0.5     |                  |
| chr28 | 11439912    | 2 | 38            | G:0.578947      | A:0.421053       |
| chr28 | 11440127    | 2 | 40            | C:0.85 T:0.15   |                  |
| chr28 | 11440362    | 2 | 36            | C:0.916667      | T:0.0833333      |
| chr28 | 11440596    | 2 | 34            | A:1 T:0         |                  |
| chr28 | 11440624    | 2 | 34            | TG:0.264706     | T:0.735294       |
| chr28 | 11440955    | 2 | 36            | C:0.805556      | A:0.194444       |
| chr28 | 11440979    | 2 | 36            | C:0.722222      | T:0.277778       |
| chr28 | 11441034    | 2 | 32            | C:0.53125       | A:0.46875        |
| chr28 | 11441221    | 2 | 38            | C:0.842105      | T:0.157895       |
| chr28 | 11441237    | 2 | 38            | T:0.736842      | C:0.263158       |
| chr28 | 11441467    | 2 | 38            | C:0.736842      | T:0.263158       |

|       |          |   |    |                    |                 |
|-------|----------|---|----|--------------------|-----------------|
| chr28 | 11441654 | 2 | 38 | C:0.368421         | T:0.631579      |
| chr28 | 11441685 | 2 | 38 | T:0.842105         | G:0.157895      |
| chr28 | 11441756 | 2 | 40 | A:0.325 G:0.675    |                 |
| chr28 | 11441841 | 2 | 38 | T:0.342105         | C:0.657895      |
| chr28 | 11441881 | 2 | 38 | G:0.368421         | A:0.631579      |
| chr28 | 11441889 | 2 | 38 | T:0.368421         | C:0.631579      |
| chr28 | 11442035 | 2 | 40 | A:0.4 C:0.6        |                 |
| chr28 | 11442388 | 2 | 34 | G:0.411765         | C:0.588235      |
| chr28 | 11442453 | 2 | 36 | T:1 A:0            |                 |
| chr28 | 11443094 | 2 | 40 | A:0.4 G:0.6        |                 |
| chr28 | 11443106 | 2 | 40 | G:0.825 A:0.175    |                 |
| chr28 | 11443191 | 2 | 38 | G:0.368421         | A:0.631579      |
| chr28 | 11443231 | 2 | 38 | A:0.394737         | T:0.605263      |
| chr28 | 11443345 | 2 | 36 | T:0.805556         | C:0.194444      |
| chr28 | 11443407 | 2 | 36 | C:0.722222         | A:0.277778      |
| chr28 | 11443603 | 2 | 30 | CTATCT:0.966667    | C:0.03333333    |
| chr28 | 11443605 | 2 | 36 | ATCTAATCT:0.722222 | A:<br>0.277778  |
| chr28 | 11443607 | 2 | 34 | CT:0.764706        | C:0.235294      |
| chr28 | 11443608 | 2 | 40 | TA:0.775 T:0.225   |                 |
| chr28 | 11443609 | 2 | 38 | AATCT:0.947368     | A:0.0526316     |
| chr28 | 11443610 | 2 | 32 | ATCT:0.71875       | A:0.28125       |
| chr28 | 11443612 | 2 | 40 | C:0.775 CA:0.225   |                 |
| chr28 | 11443613 | 2 | 40 | T:0.775 A:0.225    |                 |
| chr28 | 11443968 | 2 | 40 | T:0.8 C:0.2        |                 |
| chr28 | 11444045 | 2 | 38 | G:0.842105         | C:0.157895      |
| chr28 | 11444217 | 2 | 34 | G:0.852941         | A:0.147059      |
| chr28 | 11444259 | 2 | 30 | C:0.8 T:0.2        |                 |
| chr28 | 11444508 | 3 | 4  | TAA:0.25 T:0.75    | TA:0            |
| chr28 | 11444585 | 2 | 38 | C:0.842105         | G:0.157895      |
| chr28 | 11444718 | 2 | 36 | A:0.722222         | G:0.277778      |
| chr28 | 11445107 | 2 | 38 | A:0.789474         | AG:0.210526     |
| chr28 | 11445115 | 2 | 40 | G:0.8 C:0.2        |                 |
| chr28 | 11446124 | 2 | 38 | C:0.684211         | G:0.315789      |
| chr28 | 11446159 | 2 | 40 | C:0.775 T:0.225    |                 |
| chr28 | 11446167 | 2 | 40 | G:0.775 A:0.225    |                 |
| chr28 | 11446192 | 2 | 40 | C:0.8 T:0.2        |                 |
| chr28 | 11446200 | 2 | 38 | G:0.815789         | C:0.184211      |
| chr28 | 11446255 | 2 | 36 | G:1 A:0            |                 |
| chr28 | 11446275 | 2 | 36 | T:0.777778         | G:0.222222      |
| chr28 | 11446490 | 2 | 38 | T:0.447368         | C:0.552632      |
| chr28 | 11446497 | 2 | 38 | G:0.763158         | A:0.236842      |
| chr28 | 11446963 | 2 | 36 | G:1 A:0            |                 |
| chr28 | 11447015 | 2 | 34 | A:0 G:1            |                 |
| chr28 | 11447231 | 2 | 36 | G:0.805556         | A:0.194444      |
| chr28 | 11447532 | 2 | 38 | G:0.578947         | A:0.421053      |
| chr28 | 11447712 | 2 | 38 | T:0.447368         | TATCTC:0.552632 |
| chr28 | 11448227 | 2 | 40 | AGCTGGTCCAT:0.675  | A:0.325         |
| chr28 | 11448339 | 2 | 32 | T:0.75 G:0.25      |                 |
| chr28 | 11448341 | 2 | 32 | T:1 C:0            |                 |
| chr28 | 11448848 | 2 | 40 | CAACAGGG:0.8       | C:0.2           |
| chr28 | 11449428 | 2 | 34 | C:0.764706         | T:0.235294      |
| chr28 | 11449436 | 2 | 34 | AC:0.411765        | A:0.588235      |
| chr28 | 11449587 | 2 | 34 | G:0.764706         | A:0.235294      |

|       |          |   |    |              |                 |              |
|-------|----------|---|----|--------------|-----------------|--------------|
| chr28 | 11449611 | 2 | 40 | A:0.775      | G:0.225         |              |
| chr28 | 11449847 | 2 | 36 | C:0.75       | T:0.25          |              |
| chr28 | 11449862 | 2 | 36 | A:0.833333   |                 | G:0.166667   |
| chr28 | 11449948 | 2 | 38 | A:0.736842   |                 | G:0.263158   |
| chr28 | 11450011 | 2 | 40 | C:0.8        | A:0.2           |              |
| chr28 | 11450081 | 2 | 34 | T:0.794118   |                 | G:0.205882   |
| chr28 | 11450420 | 2 | 36 | C:1          | T:0             |              |
| chr28 | 11450463 | 2 | 40 | C:1          | T:0             |              |
| chr28 | 11450545 | 2 | 40 | A:0.8        | T:0.2           |              |
| chr28 | 11450739 | 2 | 38 | G:0.684211   |                 | A:0.315789   |
| chr28 | 11450777 | 2 | 38 | T:0.210526   |                 | C:0.789474   |
| chr28 | 11450789 | 2 | 38 | A:0.210526   |                 | C:0.789474   |
| chr28 | 11450968 | 2 | 38 | G:0.315789   |                 | A:0.684211   |
| chr28 | 11451049 | 2 | 38 | A:0.763158   |                 | AGG:0.236842 |
| chr28 | 11451066 | 2 | 38 | A:0.236842   |                 | G:0.763158   |
| chr28 | 11451117 | 2 | 38 | G:0.447368   |                 | C:0.552632   |
| chr28 | 11451126 | 2 | 40 | C:0.75       | CGACTGGTGG:0.25 |              |
| chr28 | 11451168 | 2 | 38 | A:0.736842   |                 | C:0.263158   |
| chr28 | 11451413 | 2 | 28 | A:0.857143   |                 | G:0.142857   |
| chr28 | 11452138 | 2 | 36 | T:1          | C:0             |              |
| chr28 | 11452230 | 2 | 26 | G:0.730769   |                 | A:0.269231   |
| chr28 | 11452504 | 2 | 12 | AGG:0.833333 |                 | A:0.166667   |
| chr28 | 11452694 | 2 | 30 | G:0.766667   |                 | T:0.233333   |
| chr28 | 11452814 | 2 | 38 | T:0.763158   |                 | C:0.236842   |
| chr28 | 11452912 | 2 | 38 | C:1          | T:0             |              |
| chr28 | 11452913 | 2 | 38 | A:0.763158   |                 | G:0.236842   |
| chr28 | 11452971 | 2 | 36 | T:1          | C:0             |              |
| chr28 | 11452972 | 2 | 36 | TGTG:0.75    |                 | T:0.25       |
| chr28 | 11452982 | 2 | 36 | C:0.75       | G:0.25          |              |
| chr28 | 11453002 | 2 | 34 | T:0.764706   |                 | C:0.235294   |
| chr28 | 11453120 | 2 | 34 | C:0.735294   |                 | A:0.264706   |
| chr28 | 11453144 | 2 | 34 | G:0.764706   |                 | A:0.235294   |
| chr28 | 11453154 | 2 | 36 | T:0.805556   |                 | C:0.194444   |
| chr28 | 11453161 | 2 | 36 | T:0.805556   |                 | G:0.194444   |
| chr28 | 11453179 | 2 | 36 | T:0.805556   |                 | C:0.194444   |
| chr28 | 11453221 | 2 | 38 | G:0.763158   |                 | A:0.236842   |
| chr28 | 11453242 | 2 | 38 | A:0.763158   |                 | C:0.236842   |
| chr28 | 11453243 | 2 | 38 | C:0.763158   |                 | T:0.236842   |
| chr28 | 11453355 | 2 | 34 | C:0.735294   |                 | T:0.264706   |
| chr28 | 11453388 | 2 | 32 | C:0.71875    |                 | CT:0.28125   |
| chr28 | 11453520 | 2 | 36 | G:0.777778   |                 | A:0.222222   |
| chr28 | 11453524 | 2 | 34 | C:0          | CT:1            |              |
| chr28 | 11453566 | 2 | 34 | G:0.794118   |                 | A:0.205882   |
| chr28 | 11453615 | 2 | 36 | C:0.75       | T:0.25          |              |
| chr28 | 11453665 | 2 | 34 | AG:1         | A:0             |              |
| chr28 | 11453669 | 2 | 34 | G:0.764706   |                 | A:0.235294   |
| chr28 | 11453727 | 2 | 36 | T:0.722222   |                 | A:0.277778   |
| chr28 | 11453737 | 2 | 36 | T:0.722222   |                 | C:0.277778   |
| chr28 | 11453738 | 2 | 36 | A:0.722222   |                 | T:0.277778   |
| chr28 | 11453762 | 2 | 36 | A:0.694444   |                 | G:0.305556   |
| chr28 | 11453969 | 2 | 38 | C:0.710526   |                 | A:0.289474   |
| chr28 | 11454093 | 2 | 40 | GC:0.775     | G:0.225         |              |
| chr28 | 11454095 | 2 | 40 | AT:0.775     | A:0.225         |              |
| chr28 | 11454115 | 2 | 40 | C:0.775      | T:0.225         |              |

|              |          |   |    |                   |         |             |
|--------------|----------|---|----|-------------------|---------|-------------|
| chr28        | 11454364 | 2 | 38 | G:1               | A:0     |             |
| chr28        | 11454578 | 2 | 32 | GA:0.65625        |         | G:0.34375   |
| chr28        | 11454670 | 2 | 32 | GA:1              | G:0     |             |
| chr28        | 11454721 | 2 | 34 | C:0.764706        |         | T:0.235294  |
| chr28        | 11454767 | 2 | 38 | C:1               | G:0     |             |
| chr28        | 11454777 | 2 | 34 | GT:0.911765       |         | G:0.0882353 |
| chr28        | 11454794 | 2 | 38 | G:1               | A:0     |             |
| chr28        | 11454897 | 2 | 32 | C:1               | T:0     |             |
| chr28        | 11454945 | 2 | 36 | G:1               | A:0     |             |
| chr28        | 11455006 | 2 | 38 | G:0.684211        |         | A:0.315789  |
| chr28        | 11455089 | 2 | 40 | G:1               | A:0     |             |
| chr28        | 11455146 | 2 | 38 | TAGGTCAC:0.973684 |         | T:          |
| 0.0263158    |          |   |    |                   |         |             |
| chr28        | 11455185 | 2 | 36 | C:0.833333        |         | A:0.166667  |
| chr28        | 11455244 | 2 | 40 | G:0.725           | A:0.275 |             |
| chr28        | 11455431 | 2 | 40 | C:1               | T:0     |             |
| chr28        | 11455510 | 2 | 38 | A:1               | G:0     |             |
| chr28        | 11455519 | 2 | 38 | T:1               | A:0     |             |
| chr28        | 11455548 | 2 | 40 | T:1               | G:0     |             |
| chr28        | 11455648 | 2 | 38 | A:0.789474        |         | C:0.210526  |
| chr28        | 11456272 | 2 | 38 | T:0.473684        |         | C:0.526316  |
| chr28        | 11456386 | 2 | 38 | A:0.736842        |         | C:0.263158  |
| chr28        | 11456427 | 2 | 38 | C:0.710526        |         | T:0.289474  |
| chr28        | 11456677 | 2 | 32 | T:1               | C:0     |             |
| chr28        | 11456918 | 2 | 34 | A:1               | G:0     |             |
| chr28        | 11457146 | 2 | 36 | A:1               | T:0     |             |
| chr28        | 11457445 | 2 | 32 | A:1               | G:0     |             |
| chr28        | 11457551 | 2 | 38 | C:1               | T:0     |             |
| chr28        | 11457766 | 2 | 38 | G:0.842105        |         | A:0.157895  |
| chr28        | 11458514 | 2 | 38 | C:1               | T:0     |             |
| chr28        | 11458601 | 2 | 34 | G:1               | A:0     |             |
| chr28        | 11458672 | 2 | 36 | A:0.777778        |         | AT:0.222222 |
| chr28        | 11458715 | 2 | 36 | T:1               | C:0     |             |
| chr28        | 11458967 | 2 | 36 | T:1               | A:0     |             |
| chr28        | 11459007 | 2 | 38 | A:1               | AG:0    |             |
| chr28        | 11459431 | 2 | 36 | T:1               | A:0     |             |
| chr28        | 11459445 | 2 | 36 | G:1               | A:0     |             |
| chr28        | 11459521 | 2 | 28 | G:0.857143        |         | A:0.142857  |
| chr28        | 11459530 | 2 | 32 | G:1               | A:0     |             |
| chr28        | 11459536 | 2 | 36 | G:1               | A:0     |             |
| chr28        | 11459549 | 2 | 36 | C:1               | T:0     |             |
| chr28        | 11459552 | 2 | 38 | G:0.815789        |         | A:0.184211  |
| chr28        | 11459572 | 2 | 38 | G:0.815789        |         | A:0.184211  |
| chr28        | 11459585 | 2 | 40 | G:0.875           | A:0.125 |             |
| chr28        | 11459667 | 2 | 34 | A:1               | G:0     |             |
| chr28        | 11459673 | 2 | 34 | AT:0.735294       |         | A:0.264706  |
| chr28        | 11459680 | 2 | 32 | C:0.96875         |         | A:0.03125   |
| chr28        | 11459682 | 2 | 34 | A:0.735294        |         | C:0.264706  |
| chr28        | 11459865 | 3 | 34 | TG:0.558824       |         | T:0.411765  |
| GG:0.0294118 |          |   |    |                   |         |             |
| chr28        | 11459956 | 2 | 38 | C:1               | T:0     |             |
| chr28        | 11460400 | 2 | 38 | C:0.578947        |         | CT:0.421053 |
| chr28        | 11460725 | 2 | 40 | T:0.775           | C:0.225 |             |
| chr28        | 11460854 | 2 | 30 | C:0.733333        |         | T:0.266667  |

|                 |          |   |    |                             |                |
|-----------------|----------|---|----|-----------------------------|----------------|
| chr28           | 11461325 | 3 | 36 | TAA:0.611111                | T:0.138889     |
| TA:0.25         |          |   |    |                             |                |
| chr28           | 11461353 | 2 | 32 | C:0.8125                    | T:0.1875       |
| chr28           | 11461437 | 2 | 36 | A:0.722222                  | G:0.277778     |
| chr28           | 11461946 | 2 | 34 | G:1                         | T:0            |
| chr28           | 11463041 | 2 | 36 | T:0.638889                  | C:0.361111     |
| chr28           | 11463062 | 2 | 36 | A:0.638889                  | G:0.361111     |
| chr28           | 11463108 | 2 | 36 | T:0.777778                  | A:0.222222     |
| chr28           | 11463293 | 2 | 32 | CG:0.625                    | C:0.375        |
| chr28           | 11463420 | 2 | 34 | T:0.617647                  | C:0.382353     |
| chr28           | 11463474 | 2 | 38 | G:0.894737                  | T:0.105263     |
| chr28           | 11464030 | 2 | 38 | A:0.631579                  | C:0.368421     |
| chr28           | 11464210 | 2 | 38 | T:0.5                       | C:0.5          |
| chr28           | 11464364 | 2 | 34 | A:0.0294118                 | T:0.970588     |
| chr28           | 11464436 | 2 | 34 | C:0.764706                  | A:0.235294     |
| chr28           | 11465027 | 2 | 36 | C:0.472222                  | G:0.527778     |
| chr28           | 11465227 | 2 | 38 | G:0.763158                  | T:0.236842     |
| chr28           | 11465587 | 2 | 36 | T:0.527778                  | C:0.472222     |
| chr28           | 11465771 | 2 | 40 | T:0.775                     | G:0.225        |
| chr28           | 11466352 | 2 | 38 | T:0.5                       | C:0.5          |
| chr28           | 11466397 | 2 | 36 | G:0.777778                  | A:0.222222     |
| chr28           | 11466444 | 2 | 34 | A:0.382353                  | G:0.617647     |
| chr28           | 11467469 | 2 | 36 | C:0.805556                  | A:0.194444     |
| chr28           | 11467596 | 4 | 40 | AGGATGGAT:0.55              | A:0.45 AGGAT:0 |
| AGGATGGATGGAT:0 |          |   |    |                             |                |
| chr28           | 11469003 | 2 | 34 | G:1                         | A:0            |
| chr28           | 11469347 | 2 | 36 | T:0.555556                  | C:0.444444     |
| chr28           | 11469374 | 2 | 38 | A:1                         | T:0            |
| chr28           | 11469448 | 2 | 34 | G:1                         | A:0            |
| chr28           | 11469466 | 2 | 40 | C:0.8                       | T:0.2          |
| chr28           | 11469490 | 2 | 40 | G:0.8                       | A:0.2          |
| chr28           | 11469498 | 2 | 40 | A:1                         | G:0            |
| chr28           | 11469666 | 2 | 36 | G:0.777778                  | C:0.222222     |
| chr28           | 11469897 | 2 | 34 | G:0.764706                  | C:0.235294     |
| chr28           | 11470230 | 2 | 38 | T:1                         | C:0            |
| chr28           | 11470342 | 2 | 36 | TGTCA:0.805556              | T:0.194444     |
| chr28           | 11471124 | 2 | 38 | G:1                         | C:0            |
| chr28           | 11471161 | 2 | 36 | G:1                         | A:0            |
| chr28           | 11471168 | 2 | 36 | C:0.944444                  | T:0.055556     |
| chr28           | 11471323 | 2 | 38 | GATATAAATCTGCACACA:0.815789 |                |
| G:0.184211      |          |   |    |                             |                |
| chr28           | 11471334 | 2 | 38 | G:0.710526                  | A:0.289474     |
| chr28           | 11471434 | 2 | 38 | C:1                         | T:0            |
| chr28           | 11471804 | 2 | 38 | T:0.736842                  | G:0.263158     |
| chr28           | 11471966 | 2 | 36 | T:1                         | C:0            |
| chr28           | 11472208 | 2 | 38 | A:0.710526                  | G:0.289474     |
| chr28           | 11472488 | 2 | 32 | T:0.6875                    | G:0.3125       |
| chr28           | 11472688 | 2 | 34 | G:1                         | A:0            |
| chr28           | 11472799 | 2 | 40 | C:1                         | T:0            |
| chr28           | 11472986 | 2 | 36 | T:0.694444                  | C:0.305556     |
| chr28           | 11473001 | 2 | 36 | C:0.638889                  | T:0.361111     |
| chr28           | 11473356 | 2 | 36 | C:0.777778                  | G:0.222222     |
| chr28           | 11473384 | 2 | 36 | G:1                         | T:0            |
| chr28           | 11473414 | 2 | 36 | A:0.75                      | T:0.25         |



|       |          |   |    |                   |                   |
|-------|----------|---|----|-------------------|-------------------|
| chr28 | 11473688 | 2 | 38 | A:0.789474        | G:0.210526        |
| chr28 | 11474130 | 2 | 40 | T:0.775 C:0.225   |                   |
| chr28 | 11474197 | 2 | 36 | T:0.694444        | C:0.305556        |
| chr28 | 11474961 | 2 | 38 | G:1 A:0           |                   |
| chr28 | 11475340 | 2 | 40 | A:1 G:0           |                   |
| chr28 | 11475421 | 2 | 38 | G:1 C:0           |                   |
| chr28 | 11475581 | 2 | 40 | GT:0.8 G:0.2      |                   |
| chr28 | 11475811 | 2 | 36 | G:1 A:0           |                   |
| chr28 | 11476024 | 2 | 38 | G:1 A:0           |                   |
| chr28 | 11476538 | 2 | 38 | A:1 G:0           |                   |
| chr28 | 11476652 | 2 | 36 | G:1 A:0           |                   |
| chr28 | 11476824 | 2 | 34 | G:1 A:0           |                   |
| chr28 | 11477140 | 2 | 36 | G:1 A:0           |                   |
| chr28 | 11477164 | 2 | 36 | G:0.722222        | C:0.277778        |
| chr28 | 11477263 | 2 | 38 | C:0.868421        | CATATCTT:0.131579 |
| chr28 | 11477418 | 2 | 40 | C:1 T:0           |                   |
| chr28 | 11477480 | 2 | 38 | T:1 G:0           |                   |
| chr28 | 11477587 | 2 | 38 | T:1 C:0           |                   |
| chr28 | 11477592 | 2 | 38 | C:1 G:0           |                   |
| chr28 | 11477687 | 2 | 40 | G:1 T:0           |                   |
| chr28 | 11477721 | 2 | 38 | C:1 T:0           |                   |
| chr28 | 11477917 | 2 | 36 | G:0.611111        | C:0.388889        |
| chr28 | 11477984 | 2 | 40 | C:1 T:0           |                   |
| chr28 | 11478176 | 2 | 40 | C:0.95 G:0.05     |                   |
| chr28 | 11478211 | 2 | 36 | T:1 C:0           |                   |
| chr28 | 11478307 | 2 | 38 | T:1 C:0           |                   |
| chr28 | 11478461 | 2 | 36 | G:1 A:0           |                   |
| chr28 | 11478477 | 2 | 36 | T:1 C:0           |                   |
| chr28 | 11478481 | 3 | 36 | C:1 T:0           | G:0               |
| chr28 | 11478581 | 2 | 40 | G:1 C:0           |                   |
| chr28 | 11478646 | 2 | 38 | T:1 C:0           |                   |
| chr28 | 11478861 | 2 | 38 | C:1 A:0           |                   |
| chr28 | 11478872 | 2 | 38 | A:1 G:0           |                   |
| chr28 | 11478879 | 2 | 38 | T:0.763158        | C:0.236842        |
| chr28 | 11479017 | 2 | 34 | A:1 G:0           |                   |
| chr28 | 11480928 | 2 | 36 | G:0.888889        | T:0.111111        |
| chr28 | 11481038 | 2 | 40 | A:1 G:0           |                   |
| chr28 | 11481693 | 2 | 36 | G:1 T:0           |                   |
| chr28 | 11482073 | 2 | 38 | G:1 A:0           |                   |
| chr28 | 11482106 | 2 | 36 | G:1 GA:0          |                   |
| chr28 | 11482887 | 2 | 38 | G:1 T:0           |                   |
| chr28 | 11483039 | 2 | 38 | C:1 G:0           |                   |
| chr28 | 11483102 | 2 | 34 | G:1 GT:0          |                   |
| chr28 | 11483166 | 2 | 36 | C:1 A:0           |                   |
| chr28 | 11483215 | 2 | 36 | A:0.944444        | C:0.055556        |
| chr28 | 11483322 | 2 | 38 | T:1 C:0           |                   |
| chr28 | 11483461 | 2 | 36 | G:1 A:0           |                   |
| chr28 | 11483593 | 2 | 40 | T:1 C:0           |                   |
| chr28 | 11483649 | 2 | 36 | T:1 C:0           |                   |
| chr28 | 11483657 | 2 | 34 | C:1 T:0           |                   |
| chr28 | 11483764 | 2 | 32 | T:1 C:0           |                   |
| chr28 | 11483777 | 2 | 30 | A:1 G:0           |                   |
| chr28 | 11483812 | 2 | 40 | A:1 AAAAGAAAAAG:0 |                   |
| chr28 | 11483849 | 2 | 38 | A:1 G:0           |                   |

|       |            |    |             |            |             |
|-------|------------|----|-------------|------------|-------------|
| chr28 | 11484111 2 | 36 | C:1         | T:0        |             |
| chr28 | 11484522 2 | 38 | T:1         | C:0        |             |
| chr28 | 11484626 2 | 38 | G:1         | C:0        |             |
| chr28 | 11484728 2 | 36 | C:1         | T:0        |             |
| chr28 | 11484740 2 | 36 | C:1         | T:0        |             |
| chr28 | 11484799 2 | 38 | C:1         | T:0        |             |
| chr28 | 11484800 2 | 38 | G:1         | A:0        |             |
| chr28 | 11484987 2 | 38 | G:1         | A:0        |             |
| chr28 | 11485184 2 | 38 | T:1         | C:0        |             |
| chr28 | 11485308 2 | 34 | G:1         | A:0        |             |
| chr28 | 11485412 2 | 34 | G:1         | A:0        |             |
| chr28 | 11485563 2 | 34 | CT:0.941176 |            | C:0.0588235 |
| chr28 | 11485583 2 | 36 | A:1         | G:0        |             |
| chr28 | 11485671 3 | 38 | A:1         | C:0        | T:0         |
| chr28 | 11485684 2 | 38 | C:1         | T:0        |             |
| chr28 | 11485793 2 | 38 | C:1         | T:0        |             |
| chr28 | 11485949 2 | 38 | G:1         | T:0        |             |
| chr28 | 11485966 2 | 40 | T:1         | TGTTTTTG:0 |             |
| chr28 | 11486019 2 | 36 | T:1         | C:0        |             |
| chr28 | 11486116 2 | 36 | G:1         | A:0        |             |
| chr28 | 11486158 2 | 32 | G:1         | A:0        |             |
| chr28 | 11486231 2 | 38 | T:1         | C:0        |             |
| chr28 | 11486251 2 | 40 | C:1         | G:0        |             |
| chr28 | 11486293 2 | 36 | T:1         | TG:0       |             |
| chr28 | 11486369 2 | 36 | A:1         | T:0        |             |
| chr28 | 11486603 2 | 40 | T:1         | C:0        |             |
| chr28 | 11486821 2 | 38 | C:1         | T:0        |             |
| chr28 | 11486830 2 | 38 | A:1         | G:0        |             |
| chr28 | 11486883 2 | 40 | A:1         | G:0        |             |
| chr28 | 11487163 2 | 34 | G:0.911765  |            | T:0.0882353 |
| chr28 | 11487466 2 | 38 | T:1         | C:0        |             |
| chr28 | 11487880 2 | 38 | T:1         | C:0        |             |
| chr28 | 11488166 2 | 40 | C:1         | T:0        |             |
| chr28 | 11488286 2 | 36 | TGC:1       | T:0        |             |
| chr28 | 11488289 2 | 40 | G:1         | GCTCT:0    |             |
| chr28 | 11488291 2 | 40 | G:1         | T:0        |             |
| chr28 | 11488341 2 | 40 | A:0.95      | G:0.05     |             |
| chr28 | 11488740 2 | 36 | G:1         | A:0        |             |
| chr28 | 11488817 2 | 36 | G:1         | A:0        |             |
| chr28 | 11488832 2 | 36 | C:1         | G:0        |             |
| chr28 | 11489578 2 | 38 | G:0.973684  |            | A:0.0263158 |
| chr28 | 11489756 2 | 34 | T:0.823529  |            | TA:0.176471 |
| chr28 | 11489966 2 | 36 | G:1         | A:0        |             |
| chr28 | 11490486 2 | 34 | G:1         | A:0        |             |
| chr28 | 11490715 2 | 40 | A:1         | G:0        |             |
| chr28 | 11490799 2 | 36 | T:1         | A:0        |             |
| chr28 | 11490936 2 | 38 | A:1         | G:0        |             |
| chr28 | 11490937 2 | 38 | T:1         | C:0        |             |
| chr28 | 11490945 2 | 38 | G:1         | T:0        |             |
| chr28 | 11491365 2 | 34 | C:1         | G:0        |             |
| chr28 | 11491994 2 | 40 | A:0.1       | AACT:0.9   |             |
| chr28 | 11492273 2 | 38 | A:1         | G:0        |             |
| chr28 | 11492868 2 | 28 | AG:0        | A:1        |             |
| chr28 | 11493620 2 | 36 | C:1         | A:0        |             |

|         |          |   |    |             |         |              |
|---------|----------|---|----|-------------|---------|--------------|
| chr28   | 11493665 | 2 | 28 | CG:1        | C:0     |              |
| chr28   | 11493738 | 2 | 36 | G:1         | A:0     |              |
| chr28   | 11494754 | 2 | 34 | G:1         | A:0     |              |
| chr28   | 11494775 | 2 | 36 | AG:1        | A:0     |              |
| chr28   | 11495053 | 2 | 34 | T:1         | C:0     |              |
| chr28   | 11495155 | 2 | 38 | C:1         | T:0     |              |
| chr28   | 11495639 | 2 | 38 | G:1         | A:0     |              |
| chr28   | 11495958 | 2 | 34 | G:1         | A:0     |              |
| chr28   | 11496440 | 2 | 38 | C:1         | T:0     |              |
| chr28   | 11496629 | 2 | 36 | G:1         | A:0     |              |
| chr28   | 11496751 | 2 | 34 | G:1         | GT:0    |              |
| chr28   | 11496843 | 2 | 38 | G:0.473684  |         | A:0.526316   |
| chr28   | 11496867 | 2 | 38 | C:1         | T:0     |              |
| chr28   | 11497063 | 2 | 36 | T:1         | C:0     |              |
| chr28   | 11497560 | 2 | 36 | C:1         | T:0     |              |
| chr28   | 11497797 | 2 | 38 | T:1         | A:0     |              |
| chr28   | 11497809 | 2 | 38 | TA:1        | T:0     |              |
| chr28   | 11498015 | 2 | 34 | A:1         | AT:0    |              |
| chr28   | 11499679 | 2 | 38 | A:1         | G:0     |              |
| chr28   | 11501918 | 2 | 34 | T:1         | C:0     |              |
| chr28   | 11502579 | 2 | 38 | A:1         | G:0     |              |
| chr28   | 11502629 | 2 | 36 | T:1         | C:0     |              |
| chr28   | 11502635 | 2 | 36 | A:1         | G:0     |              |
| chr28   | 11502653 | 2 | 36 | C:1         | T:0     |              |
| chr28   | 11502734 | 2 | 34 | A:1         | C:0     |              |
| chr28   | 11503113 | 2 | 38 | A:1         | G:0     |              |
| chr28   | 11503177 | 2 | 36 | T:1         | C:0     |              |
| chr28   | 11503288 | 2 | 38 | A:1         | G:0     |              |
| chr28   | 11503334 | 2 | 36 | G:1         | A:0     |              |
| chr28   | 11503634 | 2 | 38 | T:1         | C:0     |              |
| chr28   | 11504069 | 2 | 32 | G:1         | A:0     |              |
| chr28   | 11504071 | 2 | 32 | T:1         | C:0     |              |
| chr28   | 11504334 | 2 | 20 | ACC:1       | A:0     |              |
| chr28   | 11504721 | 2 | 38 | CCATTTTT:1  |         | C:0          |
| chr28   | 11505153 | 2 | 36 | G:1         | T:0     |              |
| chr28   | 11505207 | 2 | 38 | G:1         | A:0     |              |
| chr28   | 11505367 | 2 | 40 | A:1         | G:0     |              |
| chr28   | 11505524 | 2 | 40 | C:1         | T:0     |              |
| chr28   | 11505676 | 2 | 34 | C:0.764706  |         | T:0.235294   |
| chr28   | 11505773 | 2 | 36 | G:0.333333  |         | GA:0.666667  |
| chr28   | 11505867 | 2 | 40 | G:1         | A:0     |              |
| chr28   | 11506135 | 3 | 40 | CCT:0.525   |         | C:0 CCTCTCT: |
| 0.475   |          |   |    |             |         |              |
| chr28   | 11506272 | 2 | 38 | T:1         | C:0     |              |
| chr28   | 11506414 | 2 | 34 | A:0.352941  |         | G:0.647059   |
| chr28   | 11506817 | 2 | 40 | AC:0.325    | A:0.675 |              |
| chr28   | 11507238 | 3 | 32 | TTG:0.34375 |         | T:0 TTGTG:   |
| 0.65625 |          |   |    |             |         |              |
| chr28   | 11507382 | 2 | 40 | A:0.35      | G:0.65  |              |
| chr28   | 11507492 | 2 | 38 | A:0.315789  |         | T:0.684211   |
| chr28   | 11507572 | 2 | 40 | C:0.35      | A:0.65  |              |
| chr28   | 11507680 | 2 | 36 | G:0.361111  |         | A:0.638889   |
| chr28   | 11507821 | 2 | 38 | T:0.421053  |         | C:0.578947   |
| chr28   | 11507946 | 2 | 38 | G:0.342105  |         | T:0.657895   |

|                                                           |            |              |                  |                 |
|-----------------------------------------------------------|------------|--------------|------------------|-----------------|
| chr28                                                     | 11508055 2 | 38           | A:0.342105       | G:0.657895      |
| chr28                                                     | 11508165 2 | 40           | C:1 T:0          |                 |
| chr28                                                     | 11509514 2 | 36           | CT:1 C:0         |                 |
| chr28                                                     | 11509614 2 | 40           | G:1 T:0          |                 |
| chr28                                                     | 11510272 2 | 38           | T:0.421053       | G:0.578947      |
| chr28                                                     | 11511212 2 | 40           | C:0.425          |                 |
| CGCCTTGATTATGATACTACACTTGATCTTAGCCAAAAGCCGAGAAGCGAT:0.575 |            |              |                  |                 |
| chr28                                                     | 11511222 2 | 40           | A:1 G:0          |                 |
| chr28                                                     | 11511233 2 | 40           | A:0.95 G:0.05    |                 |
| chr28                                                     | 11511316 2 | 38           | C:0.315789       | T:0.684211      |
| chr28                                                     | 11511841 2 | 38           | T:0.447368       | C:0.552632      |
| chr28                                                     | 11511913 2 | 38           | C:0.263158       | T:0.736842      |
| chr28                                                     | 11512011 2 | 36           | TTG:0 T:1        |                 |
| chr28                                                     | 11512407 2 | 36           | A:0.666667       | T:0.333333      |
| chr28                                                     | 11513140 2 | 30           | CT:0.6 C:0.4     |                 |
| chr28                                                     | 11513530 2 | 38           | A:0.736842       | G:0.263158      |
| chr28                                                     | 11513642 2 | 40           | C:1 T:0          |                 |
| chr28                                                     | 11514371 2 | 40           | T:0.2 C:0.8      |                 |
| chr28                                                     | 11514674 2 | 40           | C:0 CA:1         |                 |
| chr28                                                     | 11514693 2 | 40           | C:0 T:1          |                 |
| chr28                                                     | 11514765 2 | 40           | A:1 T:0          |                 |
| chr28                                                     | 11514797 2 | 38           | G:0.0789474      | GATT:0.921053   |
| chr28                                                     | 11514978 2 | 40           | C:0.1 G:0.9      |                 |
| chr28                                                     | 11515167 2 | 38           | GCTGT:0.105263   | G:0.894737      |
| chr28                                                     | 11515383 2 | 34           | T:0.0294118      | C:0.970588      |
| chr28                                                     | 11515793 2 | 36           | C:0.194444       | G:0.805556      |
| chr28                                                     | 11516163 2 | 34           | CAAGAT:0.852941  | C:0.147059      |
| chr28                                                     | 11516390 2 | 36           | C:0.777778       | CCCA:0.222222   |
| chr28                                                     | 11516429 2 | 38           | C:0.789474       | T:0.210526      |
| chr28                                                     | 11516463 2 | 36           | C:0.777778       | T:0.222222      |
| chr28                                                     | 11516757 2 | 36           | G:0.222222       | A:0.777778      |
| chr28                                                     | 11516761 2 | 36           | A:0.0277778      | G:0.972222      |
| chr28                                                     | 11516798 2 | 36           | C:0.472222       | T:0.527778      |
| chr28                                                     | 11517070 2 | 36           | G:0.861111       | C:0.138889      |
| chr28                                                     | 11517763 2 | 38           | A:0.815789       | T:0.184211      |
| chr28                                                     | 11517929 2 | 38           | C:0.815789       | T:0.184211      |
| chr28                                                     | 11518074 2 | 40           | C:0.975 T:0.025  |                 |
| chr28                                                     | 11518205 2 | 30           | G:0.866667       | A:0.133333      |
| chr28                                                     | 11518482 2 | 36           | G:0.972222       | A:0.0277778     |
| chr28                                                     | 11518915 2 | 36           | C:0.861111       | T:0.138889      |
| chr28                                                     | 11519820 2 | 36           | G:0.194444       | A:0.805556      |
| chr28                                                     | 11520070 2 | 36           | A:0.0277778      | C:0.972222      |
| chr28                                                     | 11520739 2 | 38           | A:0.105263       | ATTTAT:0.894737 |
| chr28                                                     | 11521589 2 | 36           | TCGC:0.194444    | T:0.805556      |
| chr28                                                     | 11521714 2 | 36           | C:0.277778       | A:0.722222      |
| chr28                                                     | 11522169 2 | 38           | C:0.210526       | T:0.789474      |
| chr28                                                     | 11522337 2 | 32           | CT:0.9375        | C:0.0625        |
| chr28                                                     | 11522354 4 | 34           | T:0.323529       | C:0.147059      |
| TC:0.294118                                               |            | TTC:0.235294 |                  |                 |
| chr28                                                     | 11522935 2 | 40           | TA:0.275 T:0.725 |                 |
| chr28                                                     | 11523560 2 | 30           | G:0.2 GC:0.8     |                 |
| chr28                                                     | 11524592 2 | 32           | C:0.96875        | T:0.03125       |
| chr28                                                     | 11525728 2 | 34           | A:1 G:0          |                 |
| chr28                                                     | 11526058 2 | 34           | G:1 A:0          |                 |

|                       |          |   |    |                |              |
|-----------------------|----------|---|----|----------------|--------------|
| chr28                 | 11527611 | 2 | 38 | T:0.263158     | C:0.736842   |
| chr28                 | 11528478 | 2 | 38 | G:0.815789     | A:0.184211   |
| chr28                 | 11530233 | 2 | 38 | C:0            | CG:1         |
| chr28                 | 11530244 | 2 | 38 | A:0            | C:1          |
| chr28                 | 11530269 | 2 | 40 | C:0            | CA:1         |
| chr28                 | 11530274 | 2 | 40 | AT:0           | A:1          |
| chr28                 | 11530369 | 2 | 36 | G:0.972222     | A:0.0277778  |
| chr28                 | 11530818 | 2 | 34 | C:1            | G:0          |
| chr28                 | 11530874 | 2 | 36 | C:1            | T:0          |
| chr28                 | 11531543 | 2 | 36 | G:0.388889     | T:0.611111   |
| chr28                 | 11532105 | 2 | 32 | T:1            | TGAGA:0      |
| chr28                 | 11532111 | 2 | 32 | A:0.90625      | G:0.09375    |
| chr28                 | 11532192 | 2 | 34 | G:1            | A:0          |
| chr28                 | 11532549 | 2 | 30 | G:1            | A:0          |
| chr28                 | 11532847 | 2 | 36 | T:1            | TACCAC:0     |
| chr28                 | 11533505 | 2 | 40 | T:0.25         | A:0.75       |
| chr28                 | 11533827 | 2 | 38 | A:0.815789     | G:0.184211   |
| chr28                 | 11533856 | 2 | 38 | T:1            | A:0          |
| chr28                 | 11533911 | 2 | 38 | T:0.421053     | C:0.578947   |
| chr28                 | 11533989 | 2 | 38 | C:0.394737     | CAG:0.605263 |
| chr28                 | 11534005 | 2 | 38 | C:1            | T:0          |
| chr28                 | 11534124 | 2 | 38 | T:1            | C:0          |
| chr28                 | 11534183 | 2 | 38 | C:1            | CT:0         |
| chr28                 | 11534650 | 2 | 40 | G:0.625        | A:0.375      |
| chr28                 | 11534799 | 2 | 36 | C:1            | T:0          |
| chr28                 | 11535501 | 2 | 34 | C:0.735294     | T:0.264706   |
| chr28                 | 11535645 | 2 | 38 | G:0.789474     | GA:0.210526  |
| chr28                 | 11535897 | 2 | 38 | C:0.815789     | T:0.184211   |
| chr28                 | 11535924 | 2 | 36 | C:1            | T:0          |
| chr28                 | 11535926 | 2 | 36 | C:0.75         | G:0.25       |
| chr28                 | 11536344 | 2 | 34 | C:0.794118     | A:0.205882   |
| chr28                 | 11536414 | 2 | 36 | G:0.861111     | A:0.138889   |
| chr28                 | 11536599 | 2 | 34 | CT:0.529412    | C:0.470588   |
| chr28                 | 11536711 | 2 | 34 | G:0.882353     | GA:0.117647  |
| chr28                 | 11537054 | 3 | 36 | GTCTC:0.527778 | G:0.444444   |
| GTCTCTCTCTC:0.0277778 |          |   |    |                |              |
| chr28                 | 11537056 | 2 | 36 | C:0.916667     | CTCTCTCTG:   |
| 0.0833333             |          |   |    |                |              |
| chr28                 | 11537152 | 2 | 40 | T:0.875        | C:0.125      |
| chr28                 | 11537281 | 2 | 34 | G:0.852941     | A:0.147059   |
| chr28                 | 11537416 | 2 | 40 | G:0.975        | A:0.025      |
| chr28                 | 11537696 | 2 | 32 | C:0.9375       | T:0.0625     |
| chr28                 | 11538009 | 2 | 40 | A:0.825        | C:0.175      |
| chr28                 | 11538294 | 2 | 38 | T:1            | TC:0         |
| chr28                 | 11538675 | 2 | 36 | T:0.805556     | C:0.194444   |
| chr28                 | 11538753 | 2 | 36 | A:0.805556     | G:0.194444   |
| chr28                 | 11539134 | 2 | 36 | GC:0.638889    | G:0.361111   |
| chr28                 | 11539147 | 2 | 36 | T:0.638889     | C:0.361111   |
| chr28                 | 11539150 | 2 | 36 | T:0.0277778    | C:0.972222   |
| chr28                 | 11539227 | 2 | 36 | G:0.972222     | T:0.0277778  |
| chr28                 | 11539262 | 2 | 40 | C:1            | T:0          |
| chr28                 | 11540390 | 2 | 34 | C:0.970588     | T:0.0294118  |
| chr28                 | 11540567 | 2 | 36 | C:0.861111     | T:0.138889   |
| chr28                 | 11540668 | 2 | 34 | C:0.794118     | T:0.205882   |

|       |          |   |    |             |           |                  |
|-------|----------|---|----|-------------|-----------|------------------|
| chr28 | 11540718 | 2 | 36 | G:0.5       | C:0.5     |                  |
| chr28 | 11540928 | 2 | 36 | G:0.444444  |           | A:0.555556       |
| chr28 | 11541108 | 2 | 34 | A:0.5       | C:0.5     |                  |
| chr28 | 11541429 | 2 | 36 | G:0.972222  |           | A:0.0277778      |
| chr28 | 11541457 | 2 | 38 | G:0.789474  |           | T:0.210526       |
| chr28 | 11541535 | 2 | 38 | G:0.973684  |           | A:0.0263158      |
| chr28 | 11541554 | 2 | 38 | C:1         | A:0       |                  |
| chr28 | 11542693 | 2 | 38 | C:1         | T:0       |                  |
| chr28 | 11543092 | 2 | 36 | G:0.25      | GCC:0.75  |                  |
| chr28 | 11543557 | 2 | 30 | A:0.533333  |           | C:0.466667       |
| chr28 | 11543704 | 2 | 38 | A:0.421053  |           | G:0.578947       |
| chr28 | 11543708 | 2 | 38 | A:1         | C:0       |                  |
| chr28 | 11543713 | 2 | 38 | A:0.421053  |           | C:0.578947       |
| chr28 | 11544014 | 2 | 34 | G:1         | A:0       |                  |
| chr28 | 11544060 | 2 | 38 | A:0.973684  |           | G:0.0263158      |
| chr28 | 11544073 | 2 | 36 | C:0.972222  |           | T:0.0277778      |
| chr28 | 11544252 | 2 | 36 | C:0.888889  |           | T:0.111111       |
| chr28 | 11544280 | 2 | 38 | A:0.605263  |           | G:0.394737       |
| chr28 | 11544391 | 2 | 36 | C:0.861111  |           | T:0.138889       |
| chr28 | 11544484 | 2 | 34 | C:0.5       | T:0.5     |                  |
| chr28 | 11544499 | 2 | 34 | G:0.970588  |           | GCT:0.0294118    |
| chr28 | 11544581 | 2 | 36 | G:0.972222  |           | A:0.0277778      |
| chr28 | 11544714 | 2 | 36 | T:0         | TG:1      |                  |
| chr28 | 11544717 | 2 | 34 | A:0.882353  |           | G:0.117647       |
| chr28 | 11544799 | 2 | 34 | G:0.529412  |           | T:0.470588       |
| chr28 | 11544827 | 2 | 36 | T:0.805556  |           | C:0.194444       |
| chr28 | 11544877 | 2 | 32 | GTGT:0.8125 |           | G:0.1875         |
| chr28 | 11544883 | 2 | 28 | GT:0.928571 |           | G:0.0714286      |
| chr28 | 11544890 | 2 | 32 | G:0.8125    | GC:0.1875 |                  |
| chr28 | 11544914 | 2 | 32 | T:0.75      | C:0.25    |                  |
| chr28 | 11544988 | 2 | 38 | C:0.5       | T:0.5     |                  |
| chr28 | 11545100 | 2 | 36 | G:0.805556  |           | GC:0.194444      |
| chr28 | 11545302 | 2 | 32 | C:0.96875   |           | T:0.03125        |
| chr28 | 11545375 | 2 | 40 | A:0.85      | G:0.15    |                  |
| chr28 | 11545391 | 2 | 38 | A:0.842105  |           | C:0.157895       |
| chr28 | 11545565 | 2 | 34 | G:0.529412  |           | T:0.470588       |
| chr28 | 11545679 | 2 | 36 | T:1         | C:0       |                  |
| chr28 | 11545691 | 2 | 34 | T:0.794118  |           | TG:0.205882      |
| chr28 | 11545745 | 2 | 38 | C:0.868421  |           | CCTGCTT:0.131579 |
| chr28 | 11545856 | 2 | 34 | G:0.382353  |           | C:0.617647       |
| chr28 | 11545895 | 2 | 34 | A:0.411765  |           | G:0.588235       |
| chr28 | 11545936 | 2 | 36 | G:0.527778  |           | T:0.472222       |
| chr28 | 11545944 | 2 | 36 | T:0.527778  |           | C:0.472222       |
| chr28 | 11546339 | 2 | 38 | C:0.394737  |           | G:0.605263       |
| chr28 | 11546711 | 2 | 40 | T:0         | C:1       |                  |
| chr28 | 11547246 | 2 | 34 | C:0.529412  |           | T:0.470588       |
| chr28 | 11547749 | 2 | 36 | T:0.5       | C:0.5     |                  |
| chr28 | 11547825 | 2 | 38 | G:0.394737  |           | A:0.605263       |
| chr28 | 11547909 | 2 | 36 | A:0.527778  |           | G:0.472222       |
| chr28 | 11547965 | 2 | 34 | G:0.558824  |           | A:0.441176       |
| chr28 | 11548201 | 2 | 34 | GGC:0.5     | G:0.5     |                  |
| chr28 | 11548684 | 2 | 36 | A:0.5       | C:0.5     |                  |
| chr28 | 11548728 | 2 | 32 | G:0.46875   |           | A:0.53125        |
| chr28 | 11548790 | 2 | 38 | T:0.973684  |           | C:0.0263158      |

|          |          |   |    |               |          |              |
|----------|----------|---|----|---------------|----------|--------------|
| chr28    | 11548905 | 2 | 40 | T:0.45        | C:0.55   |              |
| chr28    | 11549158 | 2 | 34 | C:0.705882    |          | T:0.294118   |
| chr28    | 11549225 | 2 | 38 | G:0.947368    |          | C:0.0526316  |
| chr28    | 11549422 | 2 | 36 | G:0.777778    |          | A:0.222222   |
| chr28    | 11549854 | 2 | 36 | GC:0.5        | G:0.5    |              |
| chr28    | 11549886 | 2 | 36 | A:0.388889    |          | C:0.611111   |
| chr28    | 11550451 | 2 | 34 | G:0.588235    |          | T:0.411765   |
| chr28    | 11550453 | 2 | 34 | C:0.588235    |          | T:0.411765   |
| chr28    | 11550474 | 2 | 34 | C:0.617647    |          | T:0.382353   |
| chr28    | 11550527 | 2 | 36 | T:0.472222    |          | C:0.527778   |
| chr28    | 11550532 | 2 | 36 | A:0.527778    |          | G:0.472222   |
| chr28    | 11550589 | 2 | 34 | G:0.5         | GA:0.5   |              |
| chr28    | 11551403 | 2 | 40 | T:0.725       | C:0.275  |              |
| chr28    | 11551428 | 2 | 38 | G:0.973684    |          | A:0.0263158  |
| chr28    | 11551678 | 2 | 36 | C:0.416667    |          | A:0.583333   |
| chr28    | 11551766 | 2 | 36 | A:0.972222    |          | G:0.0277778  |
| chr28    | 11552315 | 2 | 38 | C:1           | T:0      |              |
| chr28    | 11552628 | 2 | 38 | G:0.973684    |          | C:0.0263158  |
| chr28    | 11552797 | 2 | 32 | A:0.5         | G:0.5    |              |
| chr28    | 11552898 | 2 | 36 | G:0.944444    |          | A:0.0555556  |
| chr28    | 11552956 | 2 | 36 | C:0.833333    |          | T:0.166667   |
| chr28    | 11553028 | 2 | 38 | C:0.973684    |          | T:0.0263158  |
| chr28    | 11553058 | 2 | 36 | C:0.972222    |          | A:0.0277778  |
| chr28    | 11553744 | 2 | 10 | G:0.5         | A:0.5    |              |
| chr28    | 11553875 | 2 | 30 | A:0           | C:1      |              |
| chr28    | 11554042 | 2 | 32 | G:0.0625      | A:0.9375 |              |
| chr28    | 11554074 | 2 | 34 | C:1           | T:0      |              |
| chr28    | 11554165 | 2 | 30 | G:1           | T:0      |              |
| chr28    | 11554424 | 2 | 36 | T:0.944444    |          | C:0.0555556  |
| chr28    | 11554540 | 2 | 36 | G:0.972222    |          | A:0.0277778  |
| chr28    | 11554663 | 3 | 40 | AC:0          | A:0.975  | ACC:0.025    |
| chr28    | 11555304 | 2 | 38 | A:1           | C:0      |              |
| chr28    | 11555340 | 2 | 36 | C:0.972222    |          | A:0.0277778  |
| chr28    | 11555434 | 2 | 38 | A:0.0263158   |          | G:0.973684   |
| chr28    | 11555462 | 2 | 38 | A:0.973684    |          | AC:0.0263158 |
| chr28    | 11555463 | 2 | 38 | G:0.0263158   |          | C:0.973684   |
| chr28    | 11555641 | 2 | 36 | C:0.972222    |          | T:0.0277778  |
| chr28    | 11556141 | 2 | 30 | G:1           | A:0      |              |
| chr28    | 11556147 | 2 | 32 | C:0.46875     |          | T:0.53125    |
| chr28    | 11556157 | 2 | 30 | C:0.966667    |          | T:0.0333333  |
| chr28    | 11556412 | 2 | 36 | C:0.0555556   |          | G:0.944444   |
| chr28    | 11556493 | 2 | 40 | A:0.075       | G:0.925  |              |
| chr28    | 11556601 | 2 | 32 | G:0.53125     |          | A:0.46875    |
| chr28    | 11556642 | 2 | 34 | A:0.0294118   |          | G:0.970588   |
| chr28    | 11556693 | 3 | 38 | TAC:0.473684  |          | T:0 TACACAC: |
| 0.526316 |          |   |    |               |          |              |
| chr28    | 11556796 | 2 | 38 | A:0.105263    |          | G:0.894737   |
| chr28    | 11557075 | 2 | 38 | A:0.0526316   |          | G:0.947368   |
| chr28    | 11557107 | 2 | 34 | C:0.0294118   |          | T:0.970588   |
| chr28    | 11557257 | 2 | 36 | TGG:0.0277778 |          | T:0.972222   |
| chr28    | 11557409 | 2 | 38 | TCC:0.5       | T:0.5    |              |
| chr28    | 11557492 | 2 | 38 | C:0.973684    |          | T:0.0263158  |
| chr28    | 11558629 | 2 | 34 | G:1           | A:0      |              |
| chr28    | 11558708 | 3 | 38 | TAA:0.0526316 |          | T:0.0789474  |

TA:0.868421

|                                        |          |   |    |                   |          |              |  |
|----------------------------------------|----------|---|----|-------------------|----------|--------------|--|
| chr28                                  | 11558881 | 2 | 32 | T:1               | C:0      |              |  |
| chr28                                  | 11558998 | 2 | 36 | C:0.888889        |          | A:0.111111   |  |
| chr28                                  | 11559044 | 2 | 38 | T:0.552632        |          | C:0.447368   |  |
| chr28                                  | 11559049 | 2 | 38 | A:1               | G:0      |              |  |
| chr28                                  | 11559113 | 2 | 38 | C:0.552632        |          | T:0.447368   |  |
| chr28                                  | 11559336 | 2 | 36 | G:0.472222        |          | A:0.527778   |  |
| chr28                                  | 11559370 | 2 | 38 | G:0.973684        |          | A:0.0263158  |  |
| chr28                                  | 11559660 | 2 | 36 | G:0.5             | A:0.5    |              |  |
| chr28                                  | 11559680 | 2 | 36 | C:0.972222        |          | A:0.0277778  |  |
| chr28                                  | 11559789 | 2 | 38 | G:0.552632        |          | A:0.447368   |  |
| chr28                                  | 11560380 | 2 | 40 | G:1               | GAA:0    |              |  |
| chr28                                  | 11560678 | 2 | 30 | T:0.8             | C:0.2    |              |  |
| chr28                                  | 11560738 | 2 | 36 | C:0.777778        |          | T:0.222222   |  |
| chr28                                  | 11560775 | 2 | 34 | G:0.705882        |          | A:0.294118   |  |
| chr28                                  | 11560960 | 2 | 40 | ACAGGGTGACTTG:0.4 |          | A:0.6        |  |
| chr28                                  | 11561034 | 2 | 40 | T:0.45            | C:0.55   |              |  |
| chr28                                  | 11561179 | 2 | 36 | A:1               | G:0      |              |  |
| chr28                                  | 11561313 | 2 | 40 | A:1               |          |              |  |
| ATTTGTGTTGTGTTGTGTTGTATGTCCTTTATATGG:0 |          |   |    |                   |          |              |  |
| chr28                                  | 11561358 | 2 | 38 | T:0.447368        |          | C:0.552632   |  |
| chr28                                  | 11561433 | 2 | 40 | G:1               | A:0      |              |  |
| chr28                                  | 11561807 | 2 | 40 | C:0.8             | T:0.2    |              |  |
| chr28                                  | 11562183 | 2 | 40 | C:1               | T:0      |              |  |
| chr28                                  | 11562308 | 2 | 34 | A:0.470588        |          | T:0.529412   |  |
| chr28                                  | 11562402 | 2 | 34 | G:0.823529        |          | A:0.176471   |  |
| chr28                                  | 11562430 | 2 | 34 | C:1               | T:0      |              |  |
| chr28                                  | 11562453 | 2 | 36 | G:0.583333        |          | A:0.416667   |  |
| chr28                                  | 11562652 | 2 | 38 | C:1               | T:0      |              |  |
| chr28                                  | 11562724 | 2 | 40 | T:0.375           | C:0.625  |              |  |
| chr28                                  | 11562746 | 2 | 40 | A:0.375           | G:0.625  |              |  |
| chr28                                  | 11562877 | 2 | 38 | A:0.605263        |          | C:0.394737   |  |
| chr28                                  | 11562957 | 2 | 40 | G:0.425           | A:0.575  |              |  |
| chr28                                  | 11563024 | 2 | 38 | G:0.447368        |          | T:0.552632   |  |
| chr28                                  | 11563301 | 2 | 36 | T:0.444444        |          | C:0.555556   |  |
| chr28                                  | 11563332 | 2 | 38 | G:0.447368        |          | A:0.552632   |  |
| chr28                                  | 11563436 | 2 | 34 | T:0.0294118       |          | C:0.970588   |  |
| chr28                                  | 11563631 | 2 | 34 | C:0.441176        |          | T:0.558824   |  |
| chr28                                  | 11564298 | 2 | 32 | C:0.5625          | T:0.4375 |              |  |
| chr28                                  | 11564438 | 2 | 34 | G:0.0294118       |          | GTC:0.970588 |  |
| chr28                                  | 11564743 | 2 | 40 | T:0.425           | C:0.575  |              |  |
| chr28                                  | 11564765 | 2 | 38 | C:0.447368        |          | A:0.552632   |  |
| chr28                                  | 11564817 | 2 | 34 | T:0               | C:1      |              |  |
| chr28                                  | 11564942 | 2 | 36 | CTCTCT:0.472222   |          | C:0.527778   |  |
| chr28                                  | 11564975 | 2 | 38 | TA:0.5            | T:0.5    |              |  |
| chr28                                  | 11564976 | 2 | 38 | A:1               | T:0      |              |  |
| chr28                                  | 11564977 | 2 | 36 | A:1               | T:0      |              |  |
| chr28                                  | 11564997 | 2 | 38 | T:0.5             | C:0.5    |              |  |
| chr28                                  | 11565006 | 2 | 40 | G:0.575           | GA:0.425 |              |  |
| chr28                                  | 11565038 | 2 | 40 | G:0.475           | A:0.525  |              |  |
| chr28                                  | 11565040 | 2 | 40 | TGTTA:1           | T:0      |              |  |
| chr28                                  | 11565107 | 2 | 38 | A:0               | C:1      |              |  |
| chr28                                  | 11565280 | 2 | 40 | C:0.475           | A:0.525  |              |  |
| chr28                                  | 11565509 | 2 | 38 | G:0.973684        |          | A:0.0263158  |  |



|       |                       |    |                                  |            |
|-------|-----------------------|----|----------------------------------|------------|
| chr28 | 11565518 2            | 38 | C:0.605263                       | T:0.394737 |
| chr28 | 11565525 2            | 38 | C:1 T:0                          |            |
| chr28 | 11565938 2            | 32 | A:0.03125                        | T:0.96875  |
| chr28 | 11566480 2            | 38 | C:0.0263158                      | A:0.973684 |
| chr28 | 11566746 2            | 36 | A:1 G:0                          |            |
| chr28 | 11567133 2            | 34 | A:0.0294118                      | G:0.970588 |
| chr28 | 11567398 2            | 38 | C:0.0263158                      | G:0.973684 |
| chr28 | 11567410 2            | 38 | T:0.0263158                      | A:0.973684 |
| chr28 | 11567464 2            | 40 | G:0.025 C:0.975                  |            |
| chr28 | 11567663 2            | 38 | A:1 G:0                          |            |
| chr28 | 11567932 2            | 40 | A:0.025 G:0.975                  |            |
| chr28 | 11568038 2            | 40 | T:0.025 C:0.975                  |            |
| chr28 | 11568052 2            | 38 | T:0.0263158                      | C:0.973684 |
| chr28 | 11568086 2            | 38 | T:0 C:1                          |            |
| chr28 | 11568578 2            | 38 | T:0 C:1                          |            |
| chr28 | 11568998 2            | 36 | C:0.694444                       | A:0.305556 |
| chr28 | 11569485 2            | 34 | A:1 AC:0                         |            |
| chr28 | 11569547 2            | 36 | G:0.0555556                      | A:0.944444 |
| chr28 | 11569937 2            | 36 | G:1 A:0                          |            |
| chr28 | 11570207 2            | 40 | G:0.025 GA:0.975                 |            |
| chr28 | 11570420 2            | 38 | T:0.0263158                      | C:0.973684 |
| chr28 | 11570482 2            | 36 | TC:1 T:0                         |            |
| chr28 | 11571261 2            | 32 | A:0.59375                        | T:0.40625  |
| chr28 | 11571394 2            | 32 | G:0.75 C:0.25                    |            |
| chr28 | 11571395 2            | 32 | G:0.75 T:0.25                    |            |
| chr28 | 11571515 2            | 34 | C:0 CT:1                         |            |
| chr28 | 11571579 2            | 38 | C:0 A:1                          |            |
| chr28 | 11571582 2            | 38 | T:0 A:1                          |            |
| chr28 | 11571583 2            | 38 | G:0 A:1                          |            |
| chr28 | 11571586 2            | 38 | G:0 A:1                          |            |
| chr28 | 11571687 2            | 30 | C:0.666667                       | T:0.333333 |
| chr28 | 11571773 2            | 26 | CCA:0.846154                     | C:0.153846 |
| chr28 | 11571812 2            | 28 | T:0.892857                       | G:0.107143 |
| chr28 | 11572221 2            | 6  | A:0 G:1                          |            |
| chr28 | 11572368 2            | 28 | G:0.428571                       | T:0.571429 |
| chr28 | 11572559 2            | 36 | T:0.333333                       | C:0.666667 |
| chr28 | 11572602 2            | 26 | A:0.576923                       | T:0.423077 |
| chr28 | 11572697 2            | 24 | G:0.375 A:0.625                  |            |
| chr28 | 11572722 2            | 24 | G:0.666667                       | A:0.333333 |
| chr28 | 11572829 2            | 16 | A:0.625 T:0.375                  |            |
| chr28 | 11573250 2            | 26 | T:0.461538                       | C:0.538462 |
| chr28 | 11573328 2            | 32 | G:0.78125                        | A:0.21875  |
| chr28 | 11573350 2            | 30 | A:0 T:1                          |            |
| chr28 | 11573351 2            | 30 | A:0 T:1                          |            |
| chr28 | 11573352 2            | 30 | A:0 T:1                          |            |
| chr28 | 11573392 2            | 36 | A:0 AT:1                         |            |
| chr28 | 11573397 2            | 36 | A:0 AT:1                         |            |
| chr28 | 11573680 2            | 38 | T:0.5 C:0.5                      |            |
| chr28 | 11573861 2            | 40 | A:0.525 G:0.475                  |            |
| chr28 | 11573910 2            | 38 | A:0.526316                       | G:0.473684 |
| chr28 | 11573959 2            | 36 | A:1 C:0                          |            |
| chr28 | 11574101 2            | 40 | TTTTCTTTCTTTC:0.525              | T:0.475    |
| chr28 | 11574186 4            | 40 | CTTCCTTTCCTTTCCTTTCCTTTCCTTTCCT: |            |
| 0.1   | C:0.6 CTTCCTTTCCT:0.2 |    | CTTCCTTTCCTTTCCTTTCCT:0.1        |            |

|       |          |   |    |              |                |
|-------|----------|---|----|--------------|----------------|
| chr28 | 11574601 | 2 | 38 | C:0.0789474  | CAAAT:0.921053 |
| chr28 | 11574693 | 2 | 36 | T:0.583333   | G:0.416667     |
| chr28 | 11574809 | 2 | 38 | C:0.578947   | CT:0.421053    |
| chr28 | 11574818 | 2 | 38 | A:0.605263   | T:0.394737     |
| chr28 | 11575729 | 2 | 34 | AG:0.588235  | A:0.411765     |
| chr28 | 11576021 | 2 | 38 | G:1          | A:0            |
| chr28 | 11576230 | 2 | 38 | A:0.105263   | T:0.894737     |
| chr28 | 11576419 | 2 | 38 | T:0.105263   | TG:0.894737    |
| chr28 | 11576643 | 2 | 40 | CAAACAA:0.95 | C:0.05         |
| chr28 | 11576716 | 2 | 36 | GTA:0.111111 | G:0.888889     |
| chr28 | 11576738 | 2 | 38 | T:1          | A:0            |
| chr28 | 11576853 | 2 | 36 | G:0          | C:1            |
| chr28 | 11576869 | 2 | 36 | C:1          | T:0            |
| chr28 | 11577188 | 2 | 28 | CCT:0.25     | C:0.75         |
| chr28 | 11577216 | 2 | 34 | A:0.941176   | AT:0.0588235   |
| chr28 | 11577346 | 2 | 38 | G:0.131579   | A:0.868421     |
| chr28 | 11577432 | 2 | 40 | G:1          | A:0            |
| chr28 | 11577541 | 2 | 40 | C:1          | T:0            |
| chr28 | 11577594 | 2 | 38 | A:1          | G:0            |
| chr28 | 11577789 | 2 | 38 | C:0.0263158  | A:0.973684     |
| chr28 | 11577927 | 2 | 38 | T:0.0263158  | TAA:0.973684   |
| chr28 | 11577973 | 2 | 40 | T:0.025      | C:0.975        |
| chr28 | 11578112 | 2 | 40 | C:0.05       | T:0.95         |
| chr28 | 11578215 | 2 | 38 | A:0.0526316  | C:0.947368     |
| chr28 | 11578269 | 2 | 2  | C:1          | A:0            |
| chr28 | 11578484 | 2 | 32 | G:1          | A:0            |
| chr28 | 11578533 | 2 | 34 | C:0.941176   | T:0.0588235    |
| chr28 | 11578564 | 2 | 34 | C:0.0294118  | A:0.970588     |
| chr28 | 11578718 | 2 | 36 | C:0.0555556  | T:0.944444     |
| chr28 | 11578778 | 2 | 30 | TAC:0.1      | T:0.9          |
| chr28 | 11578794 | 2 | 32 | G:0.03125    | A:0.96875      |
| chr28 | 11578798 | 2 | 28 | A:1          | ATG:0          |
| chr28 | 11578865 | 2 | 36 | A:0.0833333  | T:0.916667     |
| chr28 | 11578932 | 2 | 36 | A:0.0555556  | G:0.944444     |
| chr28 | 11578956 | 2 | 36 | C:0.694444   | A:0.305556     |
| chr28 | 11579440 | 2 | 40 | G:0.175      | A:0.825        |
| chr28 | 11579558 | 2 | 40 | T:0.025      | C:0.975        |
| chr28 | 11580025 | 2 | 34 | G:1          | A:0            |
| chr28 | 11580346 | 2 | 38 | C:0.0526316  | T:0.947368     |
| chr28 | 11580885 | 2 | 38 | G:0.0263158  | T:0.973684     |
| chr28 | 11581125 | 2 | 34 | G:1          | A:0            |
| chr28 | 11581162 | 2 | 34 | G:1          | A:0            |
| chr28 | 11581232 | 2 | 40 | G:0.975      | A:0.025        |
| chr28 | 11581388 | 2 | 34 | T:0.0294118  | G:0.970588     |
| chr28 | 11581861 | 2 | 40 | G:0.025      | A:0.975        |
| chr28 | 11581981 | 2 | 40 | T:0.975      | C:0.025        |
| chr28 | 11582049 | 2 | 38 | T:1          | A:0            |
| chr28 | 11582340 | 2 | 32 | G:1          | A:0            |
| chr28 | 11582811 | 2 | 32 | C:0.96875    | T:0.03125      |
| chr28 | 11582964 | 2 | 36 | A:1          | C:0            |
| chr28 | 11583458 | 2 | 32 | AC:0.9375    | A:0.0625       |
| chr28 | 11583596 | 2 | 36 | C:0.0555556  | T:0.944444     |
| chr28 | 11583717 | 2 | 36 | C:0.0277778  | A:0.972222     |
| chr28 | 11583875 | 2 | 38 | G:0.973684   | A:0.0263158    |

|               |          |   |    |                  |           |             |
|---------------|----------|---|----|------------------|-----------|-------------|
| chr28         | 11583892 | 2 | 40 | G:0.025          | A:0.975   |             |
| chr28         | 11584035 | 2 | 36 | T:1              | C:0       |             |
| chr28         | 11584058 | 2 | 36 | T:1              | G:0       |             |
| chr28         | 11584794 | 2 | 40 | CT:0.95          | C:0.05    |             |
| chr28         | 11585232 | 2 | 36 | A:0.972222       |           | G:0.0277778 |
| chr28         | 11585430 | 2 | 30 | A:0.0666667      |           | G:0.933333  |
| chr28         | 11585454 | 2 | 32 | G:1              | C:0       |             |
| chr28         | 11585532 | 2 | 40 | A:1              | C:0       |             |
| chr28         | 11585712 | 2 | 36 | C:0.0555556      |           | T:0.944444  |
| chr28         | 11585736 | 2 | 38 | G:1              | A:0       |             |
| chr28         | 11587009 | 2 | 36 | C:0.972222       |           | T:0.0277778 |
| chr28         | 11587232 | 2 | 32 | TGA:0.03125      |           | T:0.96875   |
| chr28         | 11587312 | 2 | 34 | G:0              | A:1       |             |
| chr28         | 11587332 | 2 | 32 | G:0.75           | A:0.25    |             |
| chr28         | 11587641 | 2 | 34 | G:1              | A:0       |             |
| chr28         | 11587651 | 2 | 34 | A:0.0588235      |           | G:0.941176  |
| chr28         | 11588148 | 2 | 38 | A:0.0526316      |           | G:0.947368  |
| chr28         | 11588471 | 3 | 34 | CT:0.588235      |           | C:0.176471  |
| CTT:0.235294  |          |   |    |                  |           |             |
| chr28         | 11588601 | 2 | 34 | T:0.0294118      |           | C:0.970588  |
| chr28         | 11588763 | 2 | 36 | C:1              | T:0       |             |
| chr28         | 11589217 | 2 | 40 | C:0.05           | T:0.95    |             |
| chr28         | 11589258 | 2 | 38 | T:0.973684       |           | C:0.0263158 |
| chr28         | 11589596 | 2 | 34 | G:1              | A:0       |             |
| chr28         | 11589598 | 2 | 34 | C:0.0294118      |           | T:0.970588  |
| chr28         | 11590069 | 2 | 32 | T:1              | C:0       |             |
| chr28         | 11590104 | 2 | 32 | C:1              | T:0       |             |
| chr28         | 11590299 | 2 | 32 | C:0.0625         | A:0.9375  |             |
| chr28         | 11590481 | 2 | 38 | A:1              | G:0       |             |
| chr28         | 11590817 | 2 | 36 | G:0.0277778      |           | A:0.972222  |
| chr28         | 11590925 | 2 | 34 | T:0.0294118      |           | C:0.970588  |
| chr28         | 11591042 | 2 | 36 | T:1              | C:0       |             |
| chr28         | 11591043 | 2 | 36 | G:1              | T:0       |             |
| chr28         | 11591057 | 2 | 36 | A:1              | T:0       |             |
| chr28         | 11591069 | 2 | 38 | T:1              | C:0       |             |
| chr28         | 11591173 | 2 | 36 | G:1              | A:0       |             |
| chr28         | 11591421 | 2 | 36 | T:1              | TG:0      |             |
| chr28         | 11591717 | 2 | 38 | C:1              | T:0       |             |
| chr28         | 11591970 | 2 | 34 | G:0.0588235      |           | T:0.941176  |
| chr28         | 11592040 | 2 | 34 | T:0.588235       |           | G:0.411765  |
| chr28         | 11592531 | 2 | 36 | A:1              | G:0       |             |
| chr28         | 11592748 | 2 | 32 | T:1              | G:0       |             |
| chr28         | 11592995 | 2 | 28 | G:1              | C:0       |             |
| chr28         | 11593095 | 2 | 14 | A:0.214286       |           | G:0.785714  |
| chr28         | 11593209 | 2 | 8  | G:0.25           | A:0.75    |             |
| chr28         | 11593286 | 2 | 20 | GTGCGGC:0.3      |           | G:0.7       |
| chr28         | 11593315 | 2 | 24 | CGGGCCA:1        |           | C:0         |
| chr28         | 11593329 | 2 | 26 | GGCCAGGCCAGC:0.5 |           | G:0.5       |
| chr28         | 11593513 | 2 | 36 | C:0.0277778      |           | CG:0.972222 |
| chr28         | 11593558 | 2 | 38 | C:0.631579       |           | T:0.368421  |
| chr28         | 11594256 | 2 | 34 | C:1              | CCCCT:0   |             |
| chr28         | 11594264 | 2 | 32 | T:0.0625         | TC:0.9375 |             |
| chr28         | 11594265 | 3 | 34 | T:0.0588235      |           | TC:0.411765 |
| TCTC:0.529412 |          |   |    |                  |           |             |

|              |          |               |    |                  |              |
|--------------|----------|---------------|----|------------------|--------------|
| chr28        | 11594286 | 2             | 36 | AT:0.888889      | A:0.111111   |
| chr28        | 11594291 | 2             | 36 | T:0.444444       | A:0.555556   |
| chr28        | 11594296 | 2             | 36 | T:0.888889       | A:0.111111   |
| chr28        | 11594297 | 4             | 36 | TA:0.194444      | T:0.333333   |
| AA:0.277778  |          | TAA:0.194444  |    |                  |              |
| chr28        | 11594331 | 2             | 38 | C:1              | T:0          |
| chr28        | 11594374 | 2             | 38 | G:0.736842       | A:0.263158   |
| chr28        | 11594483 | 2             | 36 | T:0.388889       | G:0.611111   |
| chr28        | 11594670 | 2             | 40 | G:0.825          | T:0.175      |
| chr28        | 11594671 | 2             | 40 | T:0.825          | C:0.175      |
| chr28        | 11594796 | 2             | 38 | A:0.184211       | G:0.815789   |
| chr28        | 11594872 | 2             | 40 | C:0.725          | T:0.275      |
| chr28        | 11594893 | 2             | 40 | C:0.125          | CAGAA:0.875  |
| chr28        | 11595014 | 2             | 36 | A:0.194444       | G:0.805556   |
| chr28        | 11595259 | 2             | 32 | A:0.21875        | T:0.78125    |
| chr28        | 11595360 | 2             | 30 | C:0.633333       | T:0.366667   |
| chr28        | 11595626 | 2             | 38 | C:0.315789       | T:0.684211   |
| chr28        | 11595862 | 2             | 38 | G:0.605263       | T:0.394737   |
| chr28        | 11595870 | 2             | 38 | C:0.605263       | T:0.394737   |
| chr28        | 11595883 | 2             | 36 | T:0.611111       | C:0.388889   |
| chr28        | 11596094 | 2             | 38 | T:0.578947       | C:0.421053   |
| chr28        | 11596296 | 2             | 38 | G:1              | A:0          |
| chr28        | 11596429 | 2             | 40 | T:0.025          | C:0.975      |
| chr28        | 11596526 | 2             | 36 | A:0.583333       | G:0.416667   |
| chr28        | 11596568 | 2             | 38 | T:0.552632       | A:0.447368   |
| chr28        | 11596570 | 2             | 38 | C:1              | T:0          |
| chr28        | 11596721 | 2             | 38 | G:0.473684       | C:0.526316   |
| chr28        | 11596765 | 3             | 38 | GTT:0.526316     | G:0.131579   |
| GT:0.342105  |          |               |    |                  |              |
| chr28        | 11596776 | 2             | 38 | TTTTTTG:0.868421 | T:0.131579   |
| chr28        | 11596779 | 2             | 36 | TTTG:1           | T:0          |
| chr28        | 11596782 | 2             | 36 | G:0.555556       | T:0.444444   |
| chr28        | 11596785 | 2             | 36 | T:0.555556       | G:0.444444   |
| chr28        | 11596787 | 2             | 36 | T:0.638889       | G:0.361111   |
| chr28        | 11596788 | 2             | 36 | TG:0.638889      | T:0.361111   |
| chr28        | 11596789 | 3             | 38 | GTT:0.447368     | G:0.131579   |
| TTT:0.421053 |          |               |    |                  |              |
| chr28        | 11596794 | 2             | 36 | T:1              | TG:0         |
| chr28        | 11596927 | 2             | 36 | T:0.638889       | A:0.361111   |
| chr28        | 11597021 | 3             | 34 | C:0.0882353      | CT:0.617647  |
| CTT:0.294118 |          |               |    |                  |              |
| chr28        | 11597352 | 2             | 36 | C:0.666667       | T:0.333333   |
| chr28        | 11597367 | 2             | 36 | G:0.472222       | T:0.527778   |
| chr28        | 11597372 | 2             | 36 | G:0.666667       | A:0.333333   |
| chr28        | 11597823 | 2             | 34 | C:0.558824       | T:0.441176   |
| chr28        | 11598185 | 4             | 38 | CT:0.289474      | C:0.105263   |
| CTT:0.157895 |          | CTTT:0.447368 |    |                  |              |
| chr28        | 11598207 | 2             | 38 | A:0.552632       | T:0.447368   |
| chr28        | 11598277 | 2             | 34 | G:0.823529       | A:0.176471   |
| chr28        | 11598278 | 2             | 34 | A:0.823529       | T:0.176471   |
| chr28        | 11598332 | 2             | 32 | G:0.78125        | GGAT:0.21875 |
| chr28        | 11598335 | 2             | 32 | C:0.78125        | T:0.21875    |
| chr28        | 11598396 | 2             | 32 | C:0.6875         | CT:0.3125    |
| chr28        | 11598404 | 2             | 34 | C:0.0588235      | T:0.941176   |

|       |                         |    |                                 |             |
|-------|-------------------------|----|---------------------------------|-------------|
| chr28 | 11598484 2              | 36 | G:0.833333                      | T:0.166667  |
| chr28 | 11598559 2              | 38 | A:1 G:0                         |             |
| chr28 | 11598737 2              | 38 | C:0.842105                      | CA:0.157895 |
| chr28 | 11598800 4              | 38 | CTT:0.105263                    | C:0.131579  |
|       | CT:0.394737             |    | CTTT:0.368421                   |             |
| chr28 | 11598860 2              | 38 | C:0.0526316                     | T:0.947368  |
| chr28 | 11599091 2              | 36 | T:0.666667                      | G:0.333333  |
| chr28 | 11599188 2              | 38 | C:1 A:0                         |             |
| chr28 | 11599223 2              | 38 | A:0.657895                      | C:0.342105  |
| chr28 | 11599278 2              | 38 | A:0.763158                      | C:0.236842  |
| chr28 | 11599456 2              | 38 | T:0.0263158                     | C:0.973684  |
| chr28 | 11599457 2              | 38 | G:0.789474                      | A:0.210526  |
| chr28 | 11599776 2              | 40 | T:0.9 G:0.1                     |             |
| chr28 | 11599802 2              | 38 | T:0.578947                      | A:0.421053  |
| chr28 | 11599821 2              | 38 | T:0.894737                      | A:0.105263  |
| chr28 | 11599924 2              | 40 | G:0.2 A:0.8                     |             |
| chr28 | 11600197 2              | 34 | GA:0.176471                     | G:0.823529  |
| chr28 | 11600932 2              | 38 | T:0.394737                      | A:0.605263  |
| chr28 | 11601773 2              | 38 | A:0.973684                      | C:0.0263158 |
| chr28 | 11601810 2              | 40 | G:0.45 A:0.55                   |             |
| chr28 | 11601818 2              | 40 | C:1 T:0                         |             |
| chr28 | 11601898 2              | 36 | C:0.777778                      | G:0.222222  |
| chr28 | 11602097 2              | 40 | C:0.2 A:0.8                     |             |
| chr28 | 11602103 2              | 40 | T:0.975 G:0.025                 |             |
| chr28 | 11602416 2              | 36 | T:0.777778                      | C:0.222222  |
| chr28 | 11602515 2              | 38 | T:0.710526                      | C:0.289474  |
| chr28 | 11602545 2              | 40 | A:0.025 C:0.975                 |             |
| chr28 | 11602891 2              | 36 | C:0.694444                      | T:0.305556  |
| chr28 | 11603063 2              | 40 | T:0.925 G:0.075                 |             |
| chr28 | 11604252 2              | 36 | T:0.416667                      | C:0.583333  |
| chr28 | 11604357 2              | 36 | A:1 T:0                         |             |
| chr28 | 11604378 4              | 38 | TGAGAGAGAGA:0.421053            | T:          |
|       | 0.184211 TGAGA:0.368421 |    | TGAGAGAGA:0.0263158             |             |
| chr28 | 11604394 2              | 34 | AG:0.676471                     | A:0.323529  |
| chr28 | 11604396 2              | 34 | AGAGAGAG:0.676471               | A:          |
|       | 0.323529                |    |                                 |             |
| chr28 | 11604458 2              | 34 | C:0.5 G:0.5                     |             |
| chr28 | 11604478 2              | 34 | TG:0.823529                     | T:0.176471  |
| chr28 | 11604541 2              | 36 | A:0.555556                      | T:0.444444  |
| chr28 | 11604741 2              | 38 | C:0.973684                      | A:0.0263158 |
| chr28 | 11604757 2              | 40 | ATGAAGAAATGGAGACTGTTT:0.7 A:0.3 |             |
| chr28 | 11604949 2              | 40 | A:0.425 G:0.575                 |             |
| chr28 | 11604955 2              | 40 | A:1 G:0                         |             |
| chr28 | 11605172 2              | 40 | T:0.625 G:0.375                 |             |
| chr28 | 11605576 2              | 36 | C:0.694444                      | T:0.305556  |
| chr28 | 11605909 2              | 36 | C:0.888889                      | T:0.111111  |
| chr28 | 11606073 2              | 36 | A:0.722222                      | G:0.277778  |
| chr28 | 11606519 2              | 34 | A:0.794118                      | G:0.205882  |
| chr28 | 11606879 2              | 38 | CA:0.815789                     | C:0.184211  |
| chr28 | 11606945 2              | 36 | T:0.666667                      | A:0.333333  |
| chr28 | 11607011 2              | 32 | A:0.75 G:0.25                   |             |
| chr28 | 11607897 2              | 38 | C:0.236842                      | T:0.763158  |
| chr28 | 11608033 2              | 38 | G:0.552632                      | A:0.447368  |
| chr28 | 11608180 3              | 38 | TAAACAAAC:0.210526              | T:          |

0.368421 TAAAC:0.421053

|                                               |            |    |                   |             |
|-----------------------------------------------|------------|----|-------------------|-------------|
| chr28                                         | 11608898 2 | 38 | A:0.0789474       | G:0.921053  |
| chr28                                         | 11608945 2 | 40 | G:0.15 C:0.85     |             |
| chr28                                         | 11609061 2 | 36 | T:0.5 C:0.5       |             |
| chr28                                         | 11609073 2 | 36 | A:0.0833333       | T:0.916667  |
| chr28                                         | 11609146 2 | 38 | T:0.131579        | C:0.868421  |
| chr28                                         | 11609265 2 | 38 | T:0.105263        | C:0.894737  |
| chr28                                         | 11609484 2 | 32 | C:0.8125 T:0.1875 |             |
| chr28                                         | 11609564 2 | 38 | G:0.473684        | A:0.526316  |
| chr28                                         | 11609578 2 | 36 | C:0.833333        | T:0.166667  |
| chr28                                         | 11609722 2 | 36 | T:0.638889        | G:0.361111  |
| chr28                                         | 11609723 2 | 36 | A:0.166667        | C:0.833333  |
| chr28                                         | 11609803 2 | 34 | A:1 T:0           |             |
| chr28                                         | 11609990 2 | 36 | C:0.277778        | A:0.722222  |
| chr28                                         | 11610409 2 | 30 | G:0.433333        | A:0.566667  |
| chr28                                         | 11610793 2 | 36 | TCAG:0.722222     | T:0.277778  |
| chr28                                         | 11611072 2 | 38 | T:0.447368        | C:0.552632  |
| chr28                                         | 11611102 2 | 32 | T:0.46875         | C:0.53125   |
| chr28                                         | 11611344 2 | 40 | T:1 C:0           |             |
| chr28                                         | 11611618 2 | 34 | C:0.470588        | G:0.529412  |
| chr28                                         | 11611687 2 | 36 | C:0.5 T:0.5       |             |
| chr28                                         | 11611791 2 | 38 | G:1 A:0           |             |
| chr28                                         | 11611845 2 | 36 | A:0.444444        | T:0.555556  |
| chr28                                         | 11611994 2 | 38 | G:0.947368        | A:0.0526316 |
| chr28                                         | 11612122 2 | 38 | T:0.5 C:0.5       |             |
| chr28                                         | 11612128 2 | 38 | A:0.973684        | C:0.0263158 |
| chr28                                         | 11612184 2 | 36 | G:0.527778        | A:0.472222  |
| chr28                                         | 11612734 2 | 36 | C:1 T:0           |             |
| chr28                                         | 11612749 2 | 36 | G:1 C:0           |             |
| chr28                                         | 11613175 2 | 36 | G:0.972222        | A:0.0277778 |
| chr28                                         | 11613346 2 | 34 | C:0.911765        | T:0.0882353 |
| chr28                                         | 11613350 2 | 34 | G:0.911765        | T:0.0882353 |
| chr28                                         | 11613641 2 | 40 | C:1 A:0           |             |
| chr28                                         | 11613768 2 | 32 | C:1 T:0           |             |
| chr28                                         | 11613900 2 | 38 | G:1 A:0           |             |
| chr28                                         | 11614047 2 | 38 | T:1 C:0           |             |
| chr28                                         | 11614242 2 | 38 | G:0.131579        | A:0.868421  |
| chr28                                         | 11614331 2 | 38 | C:0.578947        | T:0.421053  |
| chr28                                         | 11614549 2 | 38 | C:0.973684        | T:0.0263158 |
| chr28                                         | 11614894 2 | 38 | A:0.552632        | G:0.447368  |
| chr28                                         | 11615171 2 | 38 | G:0.473684        | T:0.526316  |
| chr28                                         | 11615352 2 | 38 | T:0.421053        | TA:0.578947 |
| chr28                                         | 11615568 2 | 34 | C:0.323529        | A:0.676471  |
| chr28                                         | 11615826 2 | 38 | G:0.684211        | A:0.315789  |
| chr28                                         | 11615868 2 | 34 | CTA:0.470588      | C:0.529412  |
| chr28                                         | 11615952 2 | 40 | ATTTTT:0.9        | A:0.1       |
| chr28                                         | 11615953 2 | 34 |                   |             |
| TTTTTTTTTTTTTTTTTTTTTTTTTTGGTATTTGAA:0.617647 |            |    |                   | T:0.382353  |
| chr28                                         | 11616070 2 | 38 | C:1 CT:0          |             |
| chr28                                         | 11616117 2 | 38 | CT:0.868421       | C:0.131579  |
| chr28                                         | 11616268 2 | 36 | C:0.472222        | A:0.527778  |
| chr28                                         | 11616320 2 | 34 | G:0.5 T:0.5       |             |
| chr28                                         | 11616406 2 | 38 | GTA:1 G:0         |             |
| chr28                                         | 11616536 2 | 36 | CA:0.388889       | C:0.611111  |

|       |          |   |    |             |                |
|-------|----------|---|----|-------------|----------------|
| chr28 | 11616567 | 2 | 34 | TC:0.676471 | T:0.323529     |
| chr28 | 11616568 | 2 | 34 | C:0.705882  | CT:0.294118    |
| chr28 | 11616613 | 2 | 32 | A:0.78125   | C:0.21875      |
| chr28 | 11616697 | 2 | 32 | G:0.03125   | A:0.96875      |
| chr28 | 11616963 | 2 | 36 | G:0.777778  | C:0.222222     |
| chr28 | 11617017 | 2 | 36 | T:0.333333  | C:0.666667     |
| chr28 | 11617076 | 2 | 36 | T:0.444444  | G:0.555556     |
| chr28 | 11617079 | 2 | 36 | C:0.666667  | T:0.333333     |
| chr28 | 11617455 | 2 | 38 | G:0.5       | A:0.5          |
| chr28 | 11617492 | 2 | 36 | T:0.138889  | C:0.861111     |
| chr28 | 11617795 | 2 | 38 | A:1         | G:0            |
| chr28 | 11618216 | 2 | 34 | AT:0.970588 | A:0.0294118    |
| chr28 | 11618267 | 2 | 40 | T:0.25      | C:0.75         |
| chr28 | 11618315 | 2 | 38 | G:0.5       | A:0.5          |
| chr28 | 11618439 | 2 | 34 | T:0.794118  | C:0.205882     |
| chr28 | 11618928 | 2 | 34 | GT:0.764706 | G:0.235294     |
| chr28 | 11618960 | 2 | 30 | C:1         | A:0            |
| chr28 | 11619029 | 2 | 34 | T:0.176471  | TG:0.823529    |
| chr28 | 11619034 | 2 | 34 | C:0.441176  | T:0.558824     |
| chr28 | 11619208 | 2 | 30 | G:1         | C:0            |
| chr28 | 11619407 | 2 | 40 | A:0.975     | T:0.025        |
| chr28 | 11619418 | 2 | 40 | A:0.5       | G:0.5          |
| chr28 | 11619623 | 2 | 40 | G:0.825     | T:0.175        |
| chr28 | 11619624 | 2 | 40 | A:0.2       | T:0.8          |
| chr28 | 11619667 | 2 | 38 | C:1         | T:0            |
| chr28 | 11619802 | 2 | 40 | T:0.475     | A:0.525        |
| chr28 | 11619807 | 2 | 40 | G:0.475     | T:0.525        |
| chr28 | 11620066 | 2 | 36 | G:0.722222  | A:0.277778     |
| chr28 | 11620197 | 2 | 38 | G:1         | A:0            |
| chr28 | 11620293 | 2 | 40 | TG:0.2      | T:0.8          |
| chr28 | 11620360 | 2 | 40 | C:1         | T:0            |
| chr28 | 11620596 | 2 | 38 | G:0.447368  | A:0.552632     |
| chr28 | 11620674 | 2 | 40 | G:0.975     | A:0.025        |
| chr28 | 11620751 | 2 | 36 | A:0.444444  | G:0.555556     |
| chr28 | 11620765 | 2 | 36 | C:0.694444  | T:0.305556     |
| chr28 | 11620843 | 2 | 34 | A:0.970588  | G:0.0294118    |
| chr28 | 11620896 | 2 | 38 | A:0.605263  | C:0.394737     |
| chr28 | 11621240 | 2 | 36 | A:0.666667  | T:0.333333     |
| chr28 | 11621573 | 2 | 40 | G:0.475     | A:0.525        |
| chr28 | 11621624 | 2 | 34 | G:0.794118  | A:0.205882     |
| chr28 | 11621742 | 2 | 38 | A:0.763158  | G:0.236842     |
| chr28 | 11621773 | 2 | 40 | T:0.65      | C:0.35         |
| chr28 | 11621848 | 2 | 38 | G:0.473684  | A:0.526316     |
| chr28 | 11622244 | 2 | 34 | T:0.705882  | A:0.294118     |
| chr28 | 11623106 | 2 | 34 | A:0.411765  | AATTT:0.588235 |
| chr28 | 11623164 | 2 | 32 | C:0.59375   | T:0.40625      |
| chr28 | 11623166 | 2 | 32 | C:0.59375   | T:0.40625      |
| chr28 | 11623243 | 2 | 36 | T:0.694444  | G:0.305556     |
| chr28 | 11623314 | 2 | 36 | G:0.611111  | A:0.388889     |
| chr28 | 11623361 | 2 | 36 | C:0.583333  | T:0.416667     |
| chr28 | 11623373 | 2 | 36 | T:0.111111  | C:0.888889     |
| chr28 | 11623385 | 2 | 36 | G:0.805556  | T:0.194444     |
| chr28 | 11623406 | 2 | 34 | C:0.647059  | T:0.352941     |
| chr28 | 11623440 | 2 | 36 | T:1         | C:0            |

|                                  |          |   |    |                              |                |  |
|----------------------------------|----------|---|----|------------------------------|----------------|--|
| chr28                            | 11623894 | 2 | 36 | C:1                          | T:0            |  |
| chr28                            | 11624156 | 2 | 36 | C:0.805556                   | T:0.194444     |  |
| chr28                            | 11624224 | 2 | 38 | T:0.763158                   | C:0.236842     |  |
| chr28                            | 11624878 | 2 | 38 | A:0.789474                   | T:0.210526     |  |
| chr28                            | 11625075 | 2 | 40 | C:0.275                      | T:0.725        |  |
| chr28                            | 11625161 | 2 | 32 | C:0.21875                    | T:0.78125      |  |
| chr28                            | 11625279 | 2 | 40 | T:0.5                        | C:0.5          |  |
| chr28                            | 11625400 | 2 | 38 | GTCAC:0.973684               | G:0.0263158    |  |
| chr28                            | 11625617 | 2 | 36 | G:0.138889                   | A:0.861111     |  |
| chr28                            | 11625771 | 2 | 40 | G:0.175                      | C:0.825        |  |
| chr28                            | 11625905 | 3 | 38 | TC:0.236842                  | T:0.578947     |  |
| CC:0.184211                      |          |   |    |                              |                |  |
| chr28                            | 11625915 | 2 | 38 | T:0.421053                   | C:0.578947     |  |
| chr28                            | 11625962 | 2 | 38 | G:0.157895                   | GTATT:0.842105 |  |
| chr28                            | 11626066 | 3 | 34 | CTGTGTG:0.588235             | C:0.352941     |  |
| CTGTGTG:0.0588235                |          |   |    |                              |                |  |
| chr28                            | 11626244 | 4 | 38 | CAG:0.526316                 | C:0.289474     |  |
| CAGAG:0.0263158 CAGAGAG:0.157895 |          |   |    |                              |                |  |
| chr28                            | 11626315 | 2 | 38 | G:0.973684                   | A:0.0263158    |  |
| chr28                            | 11626402 | 2 | 32 | A:0.3125                     | G:0.6875       |  |
| chr28                            | 11626637 | 2 | 36 | C:0.416667                   | T:0.583333     |  |
| chr28                            | 11627103 | 2 | 38 | C:1                          | T:0            |  |
| chr28                            | 11627334 | 2 | 36 | A:0.805556                   | G:0.194444     |  |
| chr28                            | 11627622 | 2 | 32 | TTC:0.84375                  | T:0.15625      |  |
| chr28                            | 11627984 | 2 | 40 | T:0.725                      | G:0.275        |  |
| chr28                            | 11628016 | 2 | 36 | A:0.75                       | T:0.25         |  |
| chr28                            | 11628478 | 2 | 38 | A:0.131579                   | G:0.868421     |  |
| chr28                            | 11628656 | 2 | 36 | G:1                          | A:0            |  |
| chr28                            | 11628658 | 2 | 36 | G:1                          | A:0            |  |
| chr28                            | 11628696 | 2 | 40 | CTTTATCATATTCTTTATTCTCT:0.75 |                |  |
| C:0.25                           |          |   |    |                              |                |  |
| chr28                            | 11628917 | 2 | 34 | T:1                          | A:0            |  |
| chr28                            | 11629114 | 2 | 36 | CTTTTTT:0.861111             | C:0.138889     |  |
| chr28                            | 11629359 | 2 | 36 | A:0.5                        | G:0.5          |  |
| chr28                            | 11629750 | 2 | 34 | T:0.705882                   | C:0.294118     |  |
| chr28                            | 11629885 | 2 | 34 | G:0.764706                   | A:0.235294     |  |
| chr28                            | 11629911 | 2 | 36 | T:0.75                       | C:0.25         |  |
| chr28                            | 11629947 | 2 | 36 | C:1                          | T:0            |  |
| chr28                            | 11630066 | 2 | 36 | T:0.666667                   | G:0.333333     |  |
| chr28                            | 11630218 | 2 | 38 | T:0.736842                   | C:0.263158     |  |
| chr28                            | 11630386 | 2 | 40 | A:0.425                      | C:0.575        |  |
| chr28                            | 11630569 | 2 | 40 | A:0.775                      | G:0.225        |  |
| chr28                            | 11630669 | 2 | 38 | G:0.394737                   | A:0.605263     |  |
| chr28                            | 11630972 | 2 | 36 | C:0.944444                   | T:0.0555556    |  |
| chr28                            | 11631002 | 2 | 38 | C:1                          | G:0            |  |
| chr28                            | 11631112 | 2 | 40 | G:0.65                       | A:0.35         |  |
| chr28                            | 11631274 | 2 | 40 | C:0.5                        | T:0.5          |  |
| chr28                            | 11631806 | 2 | 36 | AT:0.611111                  | A:0.388889     |  |
| chr28                            | 11631807 | 2 | 36 | T:0.666667                   | A:0.333333     |  |
| chr28                            | 11631961 | 2 | 36 | AC:0.527778                  | A:0.472222     |  |
| chr28                            | 11631997 | 2 | 36 | G:0.638889                   | T:0.361111     |  |
| chr28                            | 11632048 | 2 | 34 | G:0.5                        | A:0.5          |  |
| chr28                            | 11632389 | 2 | 38 | A:0.157895                   | G:0.842105     |  |
| chr28                            | 11632448 | 2 | 36 | C:0.638889                   | G:0.361111     |  |



|                                             |            |    |                             |                 |
|---------------------------------------------|------------|----|-----------------------------|-----------------|
| chr28                                       | 11633018 2 | 38 | CA:0.552632                 | C:0.447368      |
| chr28                                       | 11633136 2 | 38 | T:0.236842                  | TC:0.763158     |
| chr28                                       | 11633395 2 | 38 | C:1 T:0                     |                 |
| chr28                                       | 11633438 2 | 36 | T:0.638889                  | C:0.361111      |
| chr28                                       | 11633629 2 | 36 | G:0.833333                  | A:0.166667      |
| chr28                                       | 11633883 2 | 38 | G:0.684211                  | A:0.315789      |
| chr28                                       | 11634053 2 | 36 | T:0.166667                  | C:0.833333      |
| chr28                                       | 11634287 2 | 36 | C:0.972222                  | T:0.0277778     |
| chr28                                       | 11634408 2 | 38 | TGTAA:0.842105              | T:0.157895      |
| chr28                                       | 11634473 2 | 40 | C:0.225 A:0.775             |                 |
| chr28                                       | 11634938 2 | 40 | C:1 CTTA:0                  |                 |
| chr28                                       | 11634941 2 | 40 | C:1 G:0                     |                 |
| chr28                                       | 11634943 2 | 40 | A:1 AGAACCTCT:0             |                 |
| chr28                                       | 11634945 2 | 40 | A:1 ATTGAAGAACC:0           |                 |
| chr28                                       | 11635125 2 | 34 | GC:0.647059                 | G:0.352941      |
| chr28                                       | 11635128 2 | 34 | T:0.647059                  | G:0.352941      |
| chr28                                       | 11635701 2 | 34 | A:0.176471                  | G:0.823529      |
| chr28                                       | 11636000 2 | 26 | G:1 A:0                     |                 |
| chr28                                       | 11636112 2 | 34 | T:0.470588                  | C:0.529412      |
| chr28                                       | 11636162 3 | 36 | G:0.916667                  | GAATA:0.0277778 |
| GAATAAATA:0.0555556                         |            |    |                             |                 |
| chr28                                       | 11636195 2 | 40 | A:1 AATACATAAATACATAAATAC:0 |                 |
| chr28                                       | 11636202 2 | 38 | A:0.973684                  | AC:0.0263158    |
| chr28                                       | 11636203 6 | 40 | A:0.35 AAAAAAAT:0.025       |                 |
| AATAAAAAAT:0.25 AATAAATAAAAAAT:0.35         |            |    |                             |                 |
| AATACATAAATAAATAAATAAAAAAT:0                |            |    |                             |                 |
| ATAAATACATAAATACATAAATAAATAAATAAAAAAT:0.025 |            |    |                             |                 |
| chr28                                       | 11636449 2 | 40 | GCAA:0.75                   | G:0.25          |
| chr28                                       | 11636450 3 | 40 | CA:0.65 C:0.1               | CAA:0.25        |
| chr28                                       | 11636585 2 | 32 | T:0.6875 C:0.3125           |                 |
| chr28                                       | 11636666 2 | 34 | A:0.617647                  | C:0.382353      |
| chr28                                       | 11636699 2 | 36 | C:0.833333                  | T:0.166667      |
| chr28                                       | 11637097 2 | 30 | C:0.766667                  | T:0.233333      |
| chr28                                       | 11637148 2 | 28 | TTC:0.5 T:0.5               |                 |
| chr28                                       | 11637876 2 | 36 | A:0.75 C:0.25               |                 |
| chr28                                       | 11638360 2 | 40 | T:0.725 C:0.275             |                 |
| chr28                                       | 11638539 2 | 38 | T:1 C:0                     |                 |
| chr28                                       | 11638683 2 | 40 | C:0.225 T:0.775             |                 |
| chr28                                       | 11638838 2 | 40 | T:0.75 G:0.25               |                 |
| chr28                                       | 11638897 2 | 40 | A:1 AGC:0                   |                 |
| chr28                                       | 11638902 3 | 40 | A:0.625 ACG:0.375           | G:0             |
| chr28                                       | 11638910 2 | 40 | G:0.675 GCGACA:0.325        |                 |
| chr28                                       | 11638912 2 | 36 | A:0.888889                  | G:0.111111      |
| chr28                                       | 11639095 2 | 36 | C:1 T:0                     |                 |
| chr28                                       | 11639874 2 | 34 | C:0.794118                  | A:0.205882      |
| chr28                                       | 11640588 6 | 40 | CATCTATCTATCTATCTATCT:0.25  |                 |
| C:0.35 CATCTATCTATCTATCT:0.125              |            |    |                             |                 |
| CATCTATCTATCTATCTATCTATCT:0                 |            |    |                             |                 |
| 0                                           |            |    |                             |                 |
| chr28                                       | 11640754 2 | 38 | A:0 C:1                     |                 |
| chr28                                       | 11640794 2 | 38 | T:0.0526316                 | TTATC:0.947368  |
| chr28                                       | 11640807 2 | 38 | G:1 A:0                     |                 |
| chr28                                       | 11640936 2 | 40 | A:0.975 T:0.025             |                 |
| chr28                                       | 11641278 2 | 36 | A:0.694444                  | AT:0.305556     |

|       |          |   |    |               |         |               |
|-------|----------|---|----|---------------|---------|---------------|
| chr28 | 11641403 | 2 | 40 | A:0.775       | C:0.225 |               |
| chr28 | 11641509 | 2 | 38 | G:0.710526    |         | A:0.289474    |
| chr28 | 11641581 | 2 | 38 | A:0.789474    |         | G:0.210526    |
| chr28 | 11641643 | 2 | 40 | C:0.675       | T:0.325 |               |
| chr28 | 11641993 | 2 | 36 | C:0.75        | T:0.25  |               |
| chr28 | 11642098 | 2 | 36 | AG:0.666667   |         | A:0.333333    |
| chr28 | 11642201 | 2 | 36 | G:0.75        | A:0.25  |               |
| chr28 | 11642416 | 2 | 34 | G:0.794118    |         | C:0.205882    |
| chr28 | 11642575 | 2 | 36 | G:0.694444    |         | A:0.305556    |
| chr28 | 11642692 | 2 | 34 | A:0.617647    |         | G:0.382353    |
| chr28 | 11642904 | 2 | 36 | T:0.777778    |         | C:0.222222    |
| chr28 | 11643368 | 2 | 40 | CCT:0.975     |         | C:0.025       |
| chr28 | 11643389 | 2 | 40 | C:0.65        | G:0.35  |               |
| chr28 | 11643473 | 2 | 36 | C:1           | T:0     |               |
| chr28 | 11643490 | 2 | 36 | C:0.638889    |         | T:0.361111    |
| chr28 | 11643556 | 2 | 40 | A:0.675       | G:0.325 |               |
| chr28 | 11643956 | 2 | 38 | G:0.684211    |         | A:0.315789    |
| chr28 | 11643994 | 2 | 40 | C:0.7         | T:0.3   |               |
| chr28 | 11644107 | 2 | 38 | A:1           | G:0     |               |
| chr28 | 11644288 | 2 | 36 | T:0.722222    |         | C:0.277778    |
| chr28 | 11644717 | 2 | 38 | A:0.684211    |         | G:0.315789    |
| chr28 | 11644808 | 2 | 40 | A:1           | G:0     |               |
| chr28 | 11645247 | 2 | 40 | A:0.65        | G:0.35  |               |
| chr28 | 11646411 | 2 | 36 | T:0.722222    |         | C:0.277778    |
| chr28 | 11646414 | 2 | 36 | C:0.694444    |         | T:0.305556    |
| chr28 | 11646644 | 2 | 38 | C:0.842105    |         | T:0.157895    |
| chr28 | 11647305 | 2 | 36 | GT:0.611111   |         | G:0.388889    |
| chr28 | 11648316 | 2 | 36 | TG:0.777778   |         | T:0.222222    |
| chr28 | 11648719 | 2 | 38 | C:0.368421    |         | G:0.631579    |
| chr28 | 11648877 | 2 | 36 | G:1           | A:0     |               |
| chr28 | 11648879 | 2 | 36 | G:0.472222    |         | GCA:0.527778  |
| chr28 | 11649448 | 2 | 36 | C:0.805556    |         | T:0.194444    |
| chr28 | 11649850 | 2 | 36 | T:0.972222    |         | C:0.027778    |
| chr28 | 11650074 | 2 | 38 | T:0.473684    |         | C:0.526316    |
| chr28 | 11650446 | 2 | 36 | A:1           | T:0     |               |
| chr28 | 11650763 | 2 | 38 | T:0.763158    |         | C:0.236842    |
| chr28 | 11651129 | 2 | 30 | C:0.666667    |         | CT:0.333333   |
| chr28 | 11651162 | 2 | 34 | G:0.705882    |         | A:0.294118    |
| chr28 | 11651188 | 2 | 36 | C:0.694444    |         | T:0.305556    |
| chr28 | 11651220 | 2 | 34 | G:0.735294    |         | A:0.264706    |
| chr28 | 11651262 | 2 | 36 | G:0.722222    |         | C:0.277778    |
| chr28 | 11651378 | 2 | 36 | A:0.694444    |         | G:0.305556    |
| chr28 | 11651404 | 2 | 36 | C:0.722222    |         | T:0.277778    |
| chr28 | 11651493 | 2 | 34 | A:0.617647    |         | T:0.382353    |
| chr28 | 11651708 | 2 | 36 | C:0.833333    |         | T:0.166667    |
| chr28 | 11651773 | 2 | 36 | G:0.694444    |         | A:0.305556    |
| chr28 | 11651917 | 2 | 38 | T:0.657895    |         | A:0.342105    |
| chr28 | 11651918 | 2 | 38 | T:0.657895    |         | C:0.342105    |
| chr28 | 11651981 | 2 | 38 | C:0.736842    |         | CTT:0.263158  |
| chr28 | 11652232 | 2 | 24 | C:0.708333    |         | CCTT:0.291667 |
| chr28 | 11652278 | 2 | 30 | C:0.733333    |         | T:0.266667    |
| chr28 | 11652330 | 2 | 22 | T:0.681818    |         | C:0.318182    |
| chr28 | 11652763 | 2 | 26 | C:0.961538    |         | CTA:0.0384615 |
| chr28 | 11653163 | 2 | 34 | GAGA:0.794118 |         | G:0.205882    |

|       |          |   |    |                 |                |          |
|-------|----------|---|----|-----------------|----------------|----------|
| chr28 | 11653191 | 2 | 34 | C:1             | T:0            |          |
| chr28 | 11653359 | 2 | 36 | A:0.75          | G:0.25         |          |
| chr28 | 11653409 | 2 | 30 | C:0.7           | A:0.3          |          |
| chr28 | 11653426 | 2 | 30 | G:0.866667      | A:0.133333     |          |
| chr28 | 11653579 | 2 | 32 | A:0.96875       | T:0.03125      |          |
| chr28 | 11653592 | 2 | 32 | T:0.96875       | A:0.03125      |          |
| chr28 | 11654206 | 2 | 36 | C:0.694444      | T:0.305556     |          |
| chr28 | 11654215 | 2 | 34 | A:0.5           | G:0.5          |          |
| chr28 | 11654296 | 2 | 36 | C:0.5           | T:0.5          |          |
| chr28 | 11654401 | 2 | 38 | T:0.736842      | G:0.263158     |          |
| chr28 | 11654527 | 2 | 28 | C:0.714286      | T:0.285714     |          |
| chr28 | 11654533 | 2 | 28 | T:0.428571      | C:0.571429     |          |
| chr28 | 11654573 | 3 | 34 | CCT:0.5         | C:0.294118     | CCTCTCT: |
|       | 0.205882 |   |    |                 |                |          |
| chr28 | 11654622 | 2 | 32 | C:0.75          | T:0.25         |          |
| chr28 | 11654717 | 2 | 36 | G:0.611111      | C:0.388889     |          |
| chr28 | 11654744 | 2 | 38 | T:0.684211      | C:0.315789     |          |
| chr28 | 11654788 | 2 | 38 | C:0.710526      | T:0.289474     |          |
| chr28 | 11654806 | 2 | 38 | G:0.710526      | GGA:0.289474   |          |
| chr28 | 11654835 | 2 | 38 | A:0.657895      | G:0.342105     |          |
| chr28 | 11654906 | 2 | 40 | C:0.75          | T:0.25         |          |
| chr28 | 11655174 | 2 | 38 | C:0.763158      | T:0.236842     |          |
| chr28 | 11655291 | 2 | 36 | C:0.722222      | T:0.277778     |          |
| chr28 | 11655316 | 2 | 36 | G:0.722222      | A:0.277778     |          |
| chr28 | 11655319 | 2 | 36 | G:0.972222      | A:0.0277778    |          |
| chr28 | 11655324 | 2 | 36 | C:0.75          | T:0.25         |          |
| chr28 | 11655454 | 2 | 38 | T:0.710526      | TCTTA:0.289474 |          |
| chr28 | 11655790 | 2 | 38 | T:0.684211      | C:0.315789     |          |
| chr28 | 11655791 | 2 | 38 | G:0.684211      | A:0.315789     |          |
| chr28 | 11655925 | 2 | 34 | A:1             | G:0            |          |
| chr28 | 11655948 | 2 | 30 | G:0.766667      | A:0.233333     |          |
| chr28 | 11656006 | 2 | 36 | C:1             | T:0            |          |
| chr28 | 11656314 | 2 | 38 | A:0.710526      | G:0.289474     |          |
| chr28 | 11656333 | 2 | 38 | A:0.710526      | C:0.289474     |          |
| chr28 | 11656345 | 2 | 38 | A:0.710526      | C:0.289474     |          |
| chr28 | 11656370 | 2 | 36 | A:1             | G:0            |          |
| chr28 | 11656439 | 2 | 38 | C:0.605263      | T:0.394737     |          |
| chr28 | 11656683 | 2 | 38 | C:0.657895      | G:0.342105     |          |
| chr28 | 11656689 | 2 | 40 | C:0.675         | G:0.325        |          |
| chr28 | 11656782 | 2 | 38 | G:0.657895      | A:0.342105     |          |
| chr28 | 11656805 | 2 | 40 | AG:0.7          | A:0.3          |          |
| chr28 | 11656806 | 2 | 40 | G:0.725         | A:0.275        |          |
| chr28 | 11656895 | 2 | 34 | A:0.676471      | T:0.323529     |          |
| chr28 | 11657017 | 2 | 36 | A:1             | G:0            |          |
| chr28 | 11657049 | 2 | 38 | A:0.710526      | C:0.289474     |          |
| chr28 | 11657074 | 2 | 38 | A:1             | T:0            |          |
| chr28 | 11657122 | 2 | 38 | T:1             | C:0            |          |
| chr28 | 11657324 | 2 | 40 | A:0.7           | G:0.3          |          |
| chr28 | 11657342 | 2 | 40 | A:0.7           | C:0.3          |          |
| chr28 | 11657425 | 2 | 36 | A:0.694444      | G:0.305556     |          |
| chr28 | 11657472 | 2 | 32 | CT:0.78125      | C:0.21875      |          |
| chr28 | 11657604 | 2 | 36 | A:0.694444      | G:0.305556     |          |
| chr28 | 11657746 | 2 | 36 | T:0.638889      | C:0.361111     |          |
| chr28 | 11657954 | 5 | 36 | GTTATTATTATTA:0 | G:0.555556     |          |

GTTA:0.111111    GTTATTA:0.194444    GTTATTATTA:0.138889  
 chr28    11657963 2            36            A:0.944444            G:0.0555556  
 chr28    11657969 2            34            A:1            G:0  
 chr28    11658263 2            36            A:1            G:0  
 chr28    11658441 2            40            C:0.45    A:0.55  
 chr28    11658526 2            36            A:1            T:0  
 chr28    11658790 2            36            C:1            A:0  
 chr28    11658823 2            34            A:0.147059            G:0.852941  
 chr28    11659626 2            36            C:0.777778            CT:0.222222  
 chr28    11659758 2            36            T:0.777778            C:0.222222  
 chr28    11661093 3            40            A:0.175    C:0            T:0.825  
 chr28    11661214 2            36            T:0.138889            TA:0.861111  
 chr28    11661386 2            38            G:1            A:0  
 chr28    11661490 2            36            C:1            T:0  
 chr28    11661717 2            36            C:0.194444            T:0.805556  
 chr28    11661758 2            36            A:0.25    G:0.75  
 chr28    11661816 2            34            T:1            A:0  
 chr28    11661817 2            34            G:1            T:0  
 chr28    11661984 2            38            T:0.184211            C:0.815789  
 chr28    11662084 2            34            T:0.794118            C:0.205882  
 chr28    11662169 2            34            C:1            T:0  
 chr28    11662237 2            36            T:1            TTAGGTAGAATA:0  
 chr28    11662282 2            38            G:0.815789            C:0.184211  
 chr28    11662462 2            40            AAC:0.65    A:0.35  
 chr28    11662480 2            40            ACTGTGAGCTACACTGAC:0.65    A:0.35  
 chr28    11662796 2            40            A:0.225    AC:0.775  
 chr28    11662804 2            40            C:0.8        T:0.2  
 chr28    11662825 2            40            G:0.225    A:0.775  
 chr28    11662862 2            40            T:0.175    A:0.825  
 chr28    11662884 2            40            A:0.15      T:0.85  
 chr28    11663181 2            38            A:1            ACT:0  
 chr28    11663292 2            38            A:0.184211            T:0.815789  
 chr28    11663403 2            36            T:0.194444            C:0.805556  
 chr28    11663419 2            34            T:0.735294            C:0.264706  
 chr28    11663575 2            40            C:0.2        T:0.8  
 chr28    11663586 2            40            A:0.2        AT:0.8  
 chr28    11663630 2            40            C:0.25      T:0.75  
 chr28    11663675 2            38            T:0.763158            C:0.236842  
 chr28    11663739 2            36            G:0.25      T:0.75  
 chr28    11663741 2            36            G:1            C:0  
 chr28    11663792 2            40            A:0.225    C:0.775  
 chr28    11663894 2            40            GA:0.225    G:0.775  
 chr28    11663948 2            40            C:0.25      T:0.75  
 chr28    11664110 2            40            A:1            T:0  
 chr28    11664191 2            40            T:0.675    C:0.325  
 chr28    11664251 2            40            CATA:0.15            C:0.85  
 chr28    11664254 2            40            A:1            T:0  
 chr28    11664256 2            40            T:1            C:0  
 chr28    11664326 2            40            C:0.2        T:0.8  
 chr28    11664351 2            40            T:0.2        C:0.8  
 chr28    11664406 2            38            G:0.184211            C:0.815789  
 chr28    11664486 2            40            A:1            T:0  
 chr28    11664713 2            36            G:1            A:0  
 chr28    11664724 2            36            G:0.222222            A:0.777778

|       |            |    |                   |         |              |
|-------|------------|----|-------------------|---------|--------------|
| chr28 | 11664901 2 | 38 | C:1               | A:0     |              |
| chr28 | 11664945 2 | 38 | C:0.447368        |         | A:0.552632   |
| chr28 | 11664965 2 | 38 | T:1               | A:0     |              |
| chr28 | 11665294 2 | 36 | A:0.166667        |         | G:0.833333   |
| chr28 | 11665320 2 | 34 | C:0.705882        |         | T:0.294118   |
| chr28 | 11665484 2 | 38 | G:0.236842        |         | GA:0.763158  |
| chr28 | 11665594 2 | 38 | G:0.105263        |         | A:0.894737   |
| chr28 | 11665678 2 | 36 | T:0.222222        |         | C:0.777778   |
| chr28 | 11665705 2 | 36 | C:0.722222        |         | T:0.277778   |
| chr28 | 11665706 2 | 36 | A:0.194444        |         | G:0.805556   |
| chr28 | 11665989 2 | 38 | C:1               | T:0     |              |
| chr28 | 11666004 2 | 38 | G:0.789474        |         | C:0.210526   |
| chr28 | 11666012 2 | 38 | T:1               | C:0     |              |
| chr28 | 11666106 2 | 40 | G:0.775           | A:0.225 |              |
| chr28 | 11666130 2 | 40 | T:0.225           | C:0.775 |              |
| chr28 | 11666159 2 | 38 | G:0.184211        |         | T:0.815789   |
| chr28 | 11666161 2 | 38 | C:0.184211        |         | T:0.815789   |
| chr28 | 11666193 2 | 34 | C:0.970588        |         | T:0.0294118  |
| chr28 | 11666285 2 | 34 | C:0.205882        |         | T:0.794118   |
| chr28 | 11666395 2 | 32 | G:0.15625         |         | T:0.84375    |
| chr28 | 11666414 2 | 30 | T:0.166667        |         | C:0.833333   |
| chr28 | 11666482 2 | 30 | G:0.166667        |         | A:0.833333   |
| chr28 | 11666629 2 | 40 | G:0.3             | T:0.7   |              |
| chr28 | 11666647 2 | 40 | C:1               | G:0     |              |
| chr28 | 11666701 2 | 38 | C:0.210526        |         | T:0.789474   |
| chr28 | 11666755 2 | 38 | G:0.236842        |         | A:0.763158   |
| chr28 | 11666762 2 | 38 | C:0.236842        |         | T:0.763158   |
| chr28 | 11666835 2 | 38 | CATT:0.763158     |         | C:0.236842   |
| chr28 | 11666869 2 | 40 | A:0.7             | T:0.3   |              |
| chr28 | 11666939 2 | 40 | A:0.225           | T:0.775 |              |
| chr28 | 11667041 2 | 38 | C:0.157895        |         | A:0.842105   |
| chr28 | 11667295 2 | 40 | TAC:0.95          | T:0.05  |              |
| chr28 | 11667321 2 | 38 | CACACAA:0.684211  |         | C:0.315789   |
| chr28 | 11667323 2 | 38 | CACAA:0.947368    |         | C:0.0526316  |
| chr28 | 11667325 2 | 38 | CAA:0.631579      |         | C:0.368421   |
| chr28 | 11667469 2 | 40 | C:0.7             | T:0.3   |              |
| chr28 | 11667474 2 | 40 | G:0.275           | A:0.725 |              |
| chr28 | 11667485 2 | 40 | C:0.5             | G:0.5   |              |
| chr28 | 11667540 2 | 40 | G:0.225           | A:0.775 |              |
| chr28 | 11667708 2 | 34 | T:0.823529        |         | TAC:0.176471 |
| chr28 | 11667740 2 | 38 | A:0.236842        |         | G:0.763158   |
| chr28 | 11667796 2 | 36 | T:0.222222        |         | C:0.777778   |
| chr28 | 11667797 2 | 36 | T:0.222222        |         | A:0.777778   |
| chr28 | 11667809 2 | 38 | G:1               | A:0     |              |
| chr28 | 11667887 2 | 36 | A:0.75            | G:0.25  |              |
| chr28 | 11668132 2 | 38 | T:0.526316        |         | C:0.473684   |
| chr28 | 11668503 2 | 38 | C:1               | T:0     |              |
| chr28 | 11668526 2 | 40 | GT:1              | G:0     |              |
| chr28 | 11668732 2 | 36 | GA:1              | G:0     |              |
| chr28 | 11668754 2 | 38 | C:1               | T:0     |              |
| chr28 | 11668838 2 | 36 | A:1               | G:0     |              |
| chr28 | 11668925 2 | 38 | GCCTTTAA:0.947368 |         | G:           |
|       | 0.0526316  |    |                   |         |              |
| chr28 | 11668967 2 | 32 | T:1               | C:0     |              |

|                         |           |   |    |                             |                 |                |
|-------------------------|-----------|---|----|-----------------------------|-----------------|----------------|
| chr28                   | 11669252  | 2 | 36 | T:1                         | C:0             |                |
| chr28                   | 11669308  | 2 | 40 | C:1                         | A:0             |                |
| chr28                   | 11669781  | 2 | 34 | G:1                         | C:0             |                |
| chr28                   | 11670042  | 2 | 40 | CAT:1                       | C:0             |                |
| chr28                   | 11670043  | 3 | 38 | A:0.368421                  |                 | ATG:0.5 ATGTG: |
| 0.131579                |           |   |    |                             |                 |                |
| chr28                   | 11670061  | 2 | 40 | G:1                         | A:0             |                |
| chr28                   | 11670064  | 2 | 40 | C:0.925                     | G:0.075         |                |
| chr28                   | 11670314  | 2 | 34 | AC:0.617647                 |                 | A:0.382353     |
| chr28                   | 11670454  | 2 | 36 | G:0.972222                  |                 | A:0.0277778    |
| chr28                   | 11670603  | 2 | 36 | A:0.222222                  |                 | T:0.777778     |
| chr28                   | 11671073  | 2 | 38 | C:0.947368                  |                 | T:0.0526316    |
| chr28                   | 11671184  | 2 | 36 | G:0.25                      | A:0.75          |                |
| chr28                   | 11671202  | 2 | 38 | C:0.210526                  |                 | T:0.789474     |
| chr28                   | 11671346  | 2 | 38 | T:0.210526                  |                 | C:0.789474     |
| chr28                   | 11671361  | 2 | 38 | C:0.210526                  |                 | T:0.789474     |
| chr28                   | 11671460  | 2 | 38 | T:0.789474                  |                 | A:0.210526     |
| chr28                   | 11671813  | 2 | 32 | C:0.1875                    | T:0.8125        |                |
| chr28                   | 11671926  | 2 | 40 | G:0.85                      | A:0.15          |                |
| chr28                   | 11671947  | 2 | 40 | C:0.225                     | G:0.775         |                |
| chr28                   | 11672114  | 2 | 40 | ACTTTCC:0.8                 |                 | A:0.2          |
| chr28                   | 11672145  | 2 | 40 | A:0.8                       | G:0.2           |                |
| chr28                   | 11672149  | 2 | 40 | T:0.225                     | A:0.775         |                |
| chr28                   | 11672178  | 2 | 40 | A:0.75                      | G:0.25          |                |
| chr28                   | 11672321  | 2 | 38 | C:0.789474                  |                 | G:0.210526     |
| chr28                   | 11672355  | 2 | 36 | T:0.694444                  |                 | G:0.305556     |
| chr28                   | 11672417  | 2 | 34 | TG:0.205882                 |                 | T:0.794118     |
| chr28                   | 11672566  | 6 | 40 | TTTTATTTATTTATTTATTTA:0.225 |                 |                |
| T:0.3                   | TTTTA:0.2 |   |    | TTTTATTTA:0.225             | TTTTATTTATTTA:0 |                |
| TTTTATTTATTTATTTA:0.05  |           |   |    |                             |                 |                |
| chr28                   | 11672615  | 2 | 40 | TTTA:0.8                    | T:0.2           |                |
| chr28                   | 11672855  | 2 | 40 | GTAAT:0.85                  |                 | G:0.15         |
| chr28                   | 11672983  | 2 | 36 | GATTA:0.75                  |                 | G:0.25         |
| chr28                   | 11674067  | 2 | 36 | C:0.166667                  |                 | A:0.833333     |
| chr28                   | 11674195  | 3 | 36 | TA:0.194444                 |                 | T:0.583333     |
| TAA:0.222222            |           |   |    |                             |                 |                |
| chr28                   | 11674415  | 2 | 36 | T:0.833333                  |                 | A:0.166667     |
| chr28                   | 11674480  | 2 | 40 | C:0.825                     | A:0.175         |                |
| chr28                   | 11675099  | 4 | 32 | TAA:0.34375                 |                 | T:0.21875      |
| TA:0.15625 TAAA:0.28125 |           |   |    |                             |                 |                |
| chr28                   | 11675118  | 2 | 32 | GA:0.5625                   |                 | G:0.4375       |
| chr28                   | 11675396  | 2 | 36 | C:0.25                      | CA:0.75         |                |
| chr28                   | 11675414  | 2 | 34 | G:0.794118                  |                 | A:0.205882     |
| chr28                   | 11675566  | 2 | 36 | G:0.777778                  |                 | A:0.222222     |
| chr28                   | 11675926  | 2 | 36 | TA:0.222222                 |                 | T:0.777778     |
| chr28                   | 11676070  | 2 | 36 | A:0.972222                  |                 | AT:0.0277778   |
| chr28                   | 11676090  | 2 | 36 | A:0.638889                  |                 | T:0.361111     |
| chr28                   | 11676203  | 2 | 36 | T:0.222222                  |                 | TA:0.777778    |
| chr28                   | 11676290  | 2 | 38 | G:0.736842                  |                 | A:0.263158     |
| chr28                   | 11676352  | 2 | 38 | C:0.210526                  |                 | T:0.789474     |
| chr28                   | 11676692  | 2 | 40 | TAAA:0.15                   |                 | T:0.85         |
| chr28                   | 11676696  | 2 | 40 | A:0.775                     | T:0.225         |                |
| chr28                   | 11676739  | 2 | 40 | T:0.275                     | C:0.725         |                |
| chr28                   | 11676836  | 2 | 40 | C:0.7                       | G:0.3           |                |

|       |               |   |    |                  |              |          |
|-------|---------------|---|----|------------------|--------------|----------|
| chr28 | 11676889      | 2 | 40 | C:0.65           | T:0.35       |          |
| chr28 | 11677022      | 2 | 40 | T:0.25           | TAGTC:0.75   |          |
| chr28 | 11677158      | 2 | 38 | A:0.421053       | AAG:0.578947 |          |
| chr28 | 11677159      | 2 | 38 | A:0.736842       | AG:0.263158  |          |
| chr28 | 11677164      | 2 | 38 | T:0.736842       | A:0.263158   |          |
| chr28 | 11677170      | 2 | 38 | A:0.736842       | G:0.263158   |          |
| chr28 | 11677360      | 2 | 32 | C:0.40625        | CA:0.59375   |          |
| chr28 | 11677631      | 3 | 40 | TGAGA:0.5        | T:0.175      | TGAGAGA: |
|       | 0.325         |   |    |                  |              |          |
| chr28 | 11677662      | 2 | 38 | C:0.736842       | T:0.263158   |          |
| chr28 | 11677675      | 2 | 38 | C:0.210526       | A:0.789474   |          |
| chr28 | 11677838      | 2 | 38 | C:0.184211       | G:0.815789   |          |
| chr28 | 11678159      | 3 | 38 | C:0.526316       | CT:0.236842  |          |
|       | CCTT:0.236842 |   |    |                  |              |          |
| chr28 | 11678183      | 2 | 34 | T:0.147059       | C:0.852941   |          |
| chr28 | 11678370      | 2 | 34 | A:0.794118       | G:0.205882   |          |
| chr28 | 11678849      | 2 | 36 | T:0.805556       | C:0.194444   |          |
| chr28 | 11678978      | 2 | 40 | A:0.625          | AT:0.375     |          |
| chr28 | 11679100      | 2 | 40 | T:0.975          | C:0.025      |          |
| chr28 | 11679252      | 2 | 38 | C:0.789474       | A:0.210526   |          |
| chr28 | 11679465      | 2 | 32 | C:0.375          | T:0.625      |          |
| chr28 | 11679592      | 2 | 34 | A:0.911765       | C:0.0882353  |          |
| chr28 | 11679828      | 2 | 26 | TC:0.461538      | T:0.538462   |          |
| chr28 | 11680019      | 2 | 30 | C:0.766667       | T:0.233333   |          |
| chr28 | 11680206      | 2 | 34 | C:0.294118       | G:0.705882   |          |
| chr28 | 11680249      | 2 | 34 | C:0.176471       | T:0.823529   |          |
| chr28 | 11680371      | 2 | 40 | G:0.6            | A:0.4        |          |
| chr28 | 11680456      | 2 | 34 | T:0.529412       | C:0.470588   |          |
| chr28 | 11680552      | 2 | 36 | C:0              | CA:1         |          |
| chr28 | 11681024      | 2 | 40 | G:0.525          | A:0.475      |          |
| chr28 | 11681265      | 2 | 38 | T:0.605263       | A:0.394737   |          |
| chr28 | 11681314      | 2 | 38 | C:0.710526       | T:0.289474   |          |
| chr28 | 11681488      | 2 | 40 | CAGAACTCGGATGG:1 | C:0          |          |
| chr28 | 11681515      | 2 | 40 | G:0.975          | A:0.025      |          |
| chr28 | 11681635      | 2 | 40 | T:0.625          | G:0.375      |          |
| chr28 | 11681638      | 2 | 40 | A:0.8            | ACAG:0.2     |          |
| chr28 | 11681822      | 2 | 36 | T:0.222222       | G:0.777778   |          |
| chr28 | 11681960      | 2 | 36 | C:0.555556       | T:0.444444   |          |
| chr28 | 11681964      | 2 | 34 | C:1              | T:0          |          |
| chr28 | 11682021      | 2 | 38 | G:0.236842       | A:0.763158   |          |
| chr28 | 11682113      | 2 | 38 | T:0.868421       | C:0.131579   |          |
| chr28 | 11682143      | 2 | 36 | A:0.5            | G:0.5        |          |
| chr28 | 11682214      | 2 | 34 | T:0.735294       | C:0.264706   |          |
| chr28 | 11682221      | 2 | 36 | G:0.777778       | A:0.222222   |          |
| chr28 | 11682522      | 2 | 38 | T:0.710526       | C:0.289474   |          |
| chr28 | 11682826      | 2 | 34 | C:0.470588       | A:0.529412   |          |
| chr28 | 11682863      | 2 | 34 | C:1              | T:0          |          |
| chr28 | 11682929      | 2 | 40 | T:0.625          | C:0.375      |          |
| chr28 | 11682955      | 2 | 40 | C:0.675          | T:0.325      |          |
| chr28 | 11683463      | 2 | 38 | A:1              | C:0          |          |
| chr28 | 11683516      | 2 | 28 | TA:0.75          | T:0.25       |          |
| chr28 | 11683703      | 2 | 36 | T:0.944444       | TA:0.0555556 |          |
| chr28 | 11683704      | 3 | 40 | T:0.325          | A:0.125      | TA:0.55  |
| chr28 | 11683871      | 2 | 36 | A:0.527778       | T:0.472222   |          |

|              |                 |   |    |                            |              |
|--------------|-----------------|---|----|----------------------------|--------------|
| chr28        | 11683882        | 2 | 36 | T:0.527778                 | C:0.472222   |
| chr28        | 11683904        | 2 | 36 | T:1 C:0                    |              |
| chr28        | 11683953        | 2 | 40 | G:0.525 A:0.475            |              |
| chr28        | 11684268        | 2 | 38 | T:0.394737                 | A:0.605263   |
| chr28        | 11684270        | 2 | 38 | C:0.763158                 | CT:0.236842  |
| chr28        | 11684488        | 2 | 38 | T:0.421053                 | C:0.578947   |
| chr28        | 11684636        | 2 | 36 | T:0.472222                 | C:0.527778   |
| chr28        | 11684830        | 2 | 40 | A:0.7 T:0.3                |              |
| chr28        | 11684927        | 2 | 34 | C:0.529412                 | G:0.470588   |
| chr28        | 11685424        | 2 | 38 | T:1 C:0                    |              |
| chr28        | 11685456        | 2 | 36 | A:0.583333                 | G:0.416667   |
| chr28        | 11685471        | 2 | 38 | T:1 C:0                    |              |
| chr28        | 11685838        | 2 | 40 | C:0.775 T:0.225            |              |
| chr28        | 11686012        | 2 | 36 | C:0.583333                 | A:0.416667   |
| chr28        | 11686046        | 2 | 34 | C:0.558824                 | T:0.441176   |
| chr28        | 11686094        | 2 | 36 | G:0.75 T:0.25              |              |
| chr28        | 11686482        | 2 | 40 | C:0.5 A:0.5                |              |
| chr28        | 11686583        | 2 | 40 | G:0.475 C:0.525            |              |
| chr28        | 11686733        | 2 | 38 | A:0.973684                 | T:0.0263158  |
| chr28        | 11687334        | 2 | 36 | A:0.222222                 | G:0.777778   |
| chr28        | 11687417        | 2 | 40 | C:0.85 T:0.15              |              |
| chr28        | 11688034        | 2 | 40 | A:0.775 C:0.225            |              |
| chr28        | 11688227        | 2 | 38 | T:0.763158                 | C:0.236842   |
| chr28        | 11688665        | 2 | 40 | A:0.8 T:0.2                |              |
| chr28        | 11688672        | 2 | 40 | T:0.8 TCTC:0.2             |              |
| chr28        | 11688771        | 2 | 36 | G:0.555556                 | A:0.444444   |
| chr28        | 11688958        | 2 | 34 | T:0.852941                 | TA:0.147059  |
| chr28        | 11689308        | 2 | 36 | T:0.944444                 | A:0.0555556  |
| chr28        | 11689682        | 2 | 36 | G:0.861111                 | A:0.138889   |
| chr28        | 11690414        | 2 | 38 | C:0.815789                 | T:0.184211   |
| chr28        | 11690489        | 2 | 34 | T:1 G:0                    |              |
| chr28        | 11690556        | 2 | 40 | A:0.9 ACAAAGTAGTGTCATC:0.1 |              |
| chr28        | 11690879        | 2 | 20 | TCC:1 T:0                  |              |
| chr28        | 11690883        | 2 | 20 | CCCCA:0.45                 | C:0.55       |
| chr28        | 11690885        | 2 | 22 | CCCA:0.636364              | C:0.363636   |
| chr28        | 11690888        | 2 | 20 | ACCC:1 A:0                 |              |
| chr28        | 11690889        | 2 | 22 | C:0.636364                 | G:0.363636   |
| chr28        | 11690977        | 2 | 36 | T:0.611111                 | C:0.388889   |
| chr28        | 11691100        | 2 | 38 | T:0.763158                 | C:0.236842   |
| chr28        | 11691179        | 2 | 36 | T:1 C:0                    |              |
| chr28        | 11691215        | 2 | 38 | C:0.815789                 | G:0.184211   |
| chr28        | 11691342        | 4 | 22 | TAAA:0.727273              | T:0.0909091  |
| TA:0.0909091 | TAAAA:0.0909091 |   |    |                            |              |
| chr28        | 11691381        | 3 | 24 | C:0.125 CT:0.666667        | CTT:0.208333 |
| chr28        | 11691535        | 2 | 10 | AAT:0 A:1                  |              |
| chr28        | 11691644        | 2 | 20 | A:0.1 G:0.9                |              |
| chr28        | 11691670        | 2 | 30 | T:0.9 C:0.1                |              |
| chr28        | 11691825        | 2 | 26 | A:0.807692                 | C:0.192308   |
| chr28        | 11691854        | 2 | 34 | G:0.882353                 | C:0.117647   |
| chr28        | 11691905        | 2 | 34 | C:0.941176                 | T:0.0588235  |
| chr28        | 11691985        | 2 | 38 | T:1 TA:0                   |              |
| chr28        | 11691988        | 2 | 38 | T:1 TA:0                   |              |
| chr28        | 11691989        | 2 | 38 | T:0.947368                 | TA:0.0526316 |



|                                 |          |   |    |               |                           |
|---------------------------------|----------|---|----|---------------|---------------------------|
| chr28                           | 11691991 | 2 | 38 | T:1           | TATTTATTTA:0              |
| chr28                           | 11691992 | 2 | 38 | T:0.947368    | TATTTATTTA:               |
| 0.0526316                       |          |   |    |               |                           |
| chr28                           | 11691996 | 3 | 38 | T:0.947368    | C:0 TC:                   |
| 0.0526316                       |          |   |    |               |                           |
| chr28                           | 11692094 | 2 | 38 | T:0.973684    | C:0.0263158               |
| chr28                           | 11692109 | 2 | 38 | G:0.973684    | A:0.0263158               |
| chr28                           | 11692111 | 2 | 38 | T:0.973684    | G:0.0263158               |
| chr28                           | 11692146 | 2 | 32 | T:0.75        | C:0.25                    |
| chr28                           | 11692697 | 4 | 40 | TAAA:0.5      | T:0.1 TA:0.225 TAA:       |
| 0.175                           |          |   |    |               |                           |
| chr28                           | 11692903 | 2 | 40 | C:0.975       | T:0.025                   |
| chr28                           | 11692913 | 2 | 36 | TGA:0.0277778 | T:0.972222                |
| chr28                           | 11692931 | 2 | 40 | A:0.925       | T:0.075                   |
| chr28                           | 11692946 | 2 | 40 | AAGAG:0.975   | A:0.025                   |
| chr28                           | 11692990 | 2 | 36 | G:0.972222    | T:0.0277778               |
| chr28                           | 11693149 | 2 | 38 | C:1           | T:0                       |
| chr28                           | 11693163 | 2 | 38 | G:0.947368    | A:0.0526316               |
| chr28                           | 11693239 | 2 | 38 | C:0.0263158   | T:0.973684                |
| chr28                           | 11693250 | 2 | 36 | G:0.805556    | A:0.194444                |
| chr28                           | 11693427 | 2 | 36 | T:0.944444    |                           |
| TAAATTCTAGCTAGAAAAAAA:0.0555556 |          |   |    |               |                           |
| chr28                           | 11693736 | 2 | 40 | A:0.775       | G:0.225                   |
| chr28                           | 11693880 | 2 | 38 | A:0.947368    | G:0.0526316               |
| chr28                           | 11693898 | 2 | 40 | C:0.825       | T:0.175                   |
| chr28                           | 11694331 | 2 | 40 | C:0.975       | CAGGG:0.025               |
| chr28                           | 11694333 | 2 | 40 | T:0.975       | TCC:0.025                 |
| chr28                           | 11694335 | 2 | 40 | T:0.975       | TGGGTGGCGCAGCGGTTTGGCGCC: |
| 0.025                           |          |   |    |               |                           |
| chr28                           | 11694776 | 2 | 38 | A:0.973684    | G:0.0263158               |
| chr28                           | 11694790 | 2 | 38 | C:0.763158    | T:0.236842                |
| chr28                           | 11695051 | 2 | 38 | G:0.973684    | A:0.0263158               |
| chr28                           | 11695127 | 2 | 36 | C:0.861111    | T:0.138889                |
| chr28                           | 11695129 | 2 | 36 | C:0.861111    | T:0.138889                |
| chr28                           | 11695454 | 3 | 36 | A:0.75        | AT:0.194444 ATT:          |
| 0.0555556                       |          |   |    |               |                           |
| chr28                           | 11695464 | 2 | 36 | A:0.0555556   | T:0.944444                |
| chr28                           | 11695499 | 2 | 32 | TGAGA:0.28125 | T:0.71875                 |
| chr28                           | 11695895 | 2 | 38 | G:0.736842    | T:0.263158                |
| chr28                           | 11695928 | 2 | 36 | A:0.805556    | G:0.194444                |
| chr28                           | 11695971 | 2 | 36 | C:0.805556    | CA:0.194444               |
| chr28                           | 11696043 | 2 | 40 | T:0.775       | C:0.225                   |
| chr28                           | 11696157 | 2 | 38 | A:0.789474    | T:0.210526                |
| chr28                           | 11696322 | 2 | 40 | T:0.775       | C:0.225                   |
| chr28                           | 11696333 | 2 | 40 | T:0.75        | C:0.25                    |
| chr28                           | 11696491 | 2 | 38 | T:0.815789    | G:0.184211                |
| chr28                           | 11696563 | 2 | 38 | T:0.526316    | C:0.473684                |
| chr28                           | 11696569 | 2 | 38 | A:0.763158    | C:0.236842                |
| chr28                           | 11696667 | 2 | 36 | C:1           | T:0                       |
| chr28                           | 11696696 | 2 | 36 | G:0.75        | A:0.25                    |
| chr28                           | 11696738 | 2 | 38 | T:0.789474    | C:0.210526                |
| chr28                           | 11696739 | 2 | 38 | G:1           | A:0                       |
| chr28                           | 11696799 | 2 | 36 | G:1           | T:0                       |
| chr28                           | 11696804 | 2 | 36 | A:0.0277778   | G:0.972222                |

|                                    |            |    |                |                     |
|------------------------------------|------------|----|----------------|---------------------|
| chr28                              | 11696821 2 | 38 | TC:0.763158    | T:0.236842          |
| chr28                              | 11696879 4 | 36 | TAA:0.5        | T:0.0555556 TA:0.25 |
| TAAA:0.194444                      |            |    |                |                     |
| chr28                              | 11696890 2 | 36 | A:1            | G:0                 |
| chr28                              | 11696987 2 | 38 | C:0.842105     | T:0.157895          |
| chr28                              | 11697054 2 | 36 | T:0.75         | C:0.25              |
| chr28                              | 11697164 2 | 38 | T:0.868421     | C:0.131579          |
| chr28                              | 11697601 2 | 38 | T:0.815789     | C:0.184211          |
| chr28                              | 11697656 2 | 40 | G:0.8          | A:0.2               |
| chr28                              | 11697697 2 | 36 | C:0.888889     | T:0.111111          |
| chr28                              | 11698030 2 | 40 | C:0.825        | T:0.175             |
| chr28                              | 11698157 2 | 36 | A:0.777778     | G:0.222222          |
| chr28                              | 11698169 2 | 36 | C:0.777778     | T:0.222222          |
| chr28                              | 11698275 2 | 38 | T:0.210526     | C:0.789474          |
| chr28                              | 11698653 2 | 38 | TC:0.210526    | T:0.789474          |
| chr28                              | 11698840 2 | 36 | T:0.805556     | C:0.194444          |
| chr28                              | 11698847 2 | 36 | G:0.972222     | T:0.027778          |
| chr28                              | 11699712 2 | 36 | A:0.75         | G:0.25              |
| chr28                              | 11699795 2 | 36 | C:1            | T:0                 |
| chr28                              | 11700007 2 | 38 | TTGAC:0.842105 | T:0.157895          |
| chr28                              | 11700072 2 | 38 | GC:0.210526    | G:0.789474          |
| chr28                              | 11700076 2 | 38 | A:0.210526     | ACTGT:0.789474      |
| chr28                              | 11700159 2 | 40 | T:0.275        | C:0.725             |
| chr28                              | 11700274 2 | 38 | T:0.0263158    | C:0.973684          |
| chr28                              | 11700395 2 | 36 | A:0.75         | G:0.25              |
| chr28                              | 11700691 2 | 38 | A:0.815789     | C:0.184211          |
| chr28                              | 11700988 2 | 34 | A:0.235294     | AAAG:0.764706       |
| chr28                              | 11701131 2 | 36 | C:0.277778     | T:0.722222          |
| chr28                              | 11701418 2 | 38 | A:0.342105     | G:0.657895          |
| chr28                              | 11701430 2 | 36 | CATG:1         | C:0                 |
| chr28                              | 11701535 2 | 34 | A:0.205882     | C:0.794118          |
| chr28                              | 11701569 2 | 40 | T:0.175        | G:0.825             |
| chr28                              | 11701671 2 | 38 | A:0.894737     | G:0.105263          |
| chr28                              | 11701845 2 | 38 | C:0.210526     | A:0.789474          |
| chr28                              | 11702069 2 | 38 | A:0.315789     | G:0.684211          |
| chr28                              | 11702330 2 | 38 | T:0.394737     | C:0.605263          |
| chr28                              | 11702460 2 | 38 | G:0.368421     | A:0.631579          |
| chr28                              | 11702480 2 | 38 | A:0.368421     | G:0.631579          |
| chr28                              | 11702530 2 | 34 | T:0.735294     | C:0.264706          |
| chr28                              | 11702555 2 | 34 | AT:0.735294    | A:0.264706          |
| chr28                              | 11702576 4 | 34 | CAG:0.529412   | C:0.0882353         |
| CAGAG:0.235294 CAGAGAGAG:0.147059  |            |    |                |                     |
| chr28                              | 11702775 2 | 38 | A:0.973684     | G:0.0263158         |
| chr28                              | 11703062 2 | 36 | C:0.527778     | A:0.472222          |
| chr28                              | 11703929 2 | 38 | G:0.789474     | T:0.210526          |
| chr28                              | 11703942 2 | 38 | A:1            | C:0                 |
| chr28                              | 11703970 3 | 36 | A:0.861111     | ATG:0.138889        |
| ATGTG:0                            |            |    |                |                     |
| chr28                              | 11703996 4 | 38 | G:0.605263     | A:0.131579          |
| GTGTA:0.0526316 GTGTGTGTA:0.210526 |            |    |                |                     |
| chr28                              | 11703997 2 | 36 | T:0.777778     | TGTAA:0.222222      |
| chr28                              | 11703998 2 | 36 | A:0.861111     | ATATATG:0.138889    |
| chr28                              | 11704093 2 | 40 | AACTT:0.925    | A:0.075             |
| chr28                              | 11704168 2 | 38 | T:0.447368     | G:0.552632          |

|              |          |               |    |                   |              |
|--------------|----------|---------------|----|-------------------|--------------|
| chr28        | 11704368 | 2             | 36 | C:0.833333        | T:0.166667   |
| chr28        | 11704375 | 2             | 36 | C:1 G:0           |              |
| chr28        | 11705080 | 2             | 40 | ACCAAGCAGTG:0.7   | A:0.3        |
| chr28        | 11705272 | 2             | 38 | G:0.736842        | A:0.263158   |
| chr28        | 11705417 | 2             | 30 | T:0.0333333       | C:0.966667   |
| chr28        | 11705474 | 2             | 36 | CCTCT:0.0555556   | C:0.944444   |
| chr28        | 11705581 | 2             | 32 | G:0.75 GATTT:0.25 |              |
| chr28        | 11706162 | 2             | 36 | C:0.972222        | T:0.0277778  |
| chr28        | 11706172 | 2             | 36 | G:1 A:0           |              |
| chr28        | 11706272 | 2             | 38 | T:0.184211        | C:0.815789   |
| chr28        | 11706273 | 2             | 38 | G:0.789474        | A:0.210526   |
| chr28        | 11706669 | 2             | 38 | G:0.973684        | A:0.0263158  |
| chr28        | 11706952 | 2             | 34 | T:0.441176        | G:0.558824   |
| chr28        | 11707335 | 2             | 38 | T:0.473684        | C:0.526316   |
| chr28        | 11707436 | 2             | 40 | A:0.8 ACTTCTT:0.2 |              |
| chr28        | 11707449 | 2             | 38 | A:0.0526316       | C:0.947368   |
| chr28        | 11707452 | 2             | 38 | A:0.763158        | C:0.236842   |
| chr28        | 11707559 | 2             | 34 | G:0.852941        | A:0.147059   |
| chr28        | 11707984 | 2             | 36 | G:0.972222        | A:0.0277778  |
| chr28        | 11708024 | 2             | 34 | G:0.0294118       | C:0.970588   |
| chr28        | 11708418 | 2             | 30 | G:0.866667        | A:0.133333   |
| chr28        | 11708746 | 2             | 36 | G:1 A:0           |              |
| chr28        | 11708955 | 2             | 36 | C:1 T:0           |              |
| chr28        | 11709127 | 4             | 36 | CT:0.277778       | C:0.444444   |
| CTT:0.138889 |          | CTTT:0.138889 |    |                   |              |
| chr28        | 11709326 | 2             | 38 | C:0.184211        | T:0.815789   |
| chr28        | 11709496 | 2             | 36 | G:0.944444        | A:0.0555556  |
| chr28        | 11709734 | 2             | 38 | C:0.473684        | T:0.526316   |
| chr28        | 11710319 | 2             | 40 | A:0.85 T:0.15     |              |
| chr28        | 11710511 | 2             | 40 | G:0.85 A:0.15     |              |
| chr28        | 11710516 | 2             | 40 | A:0.85 G:0.15     |              |
| chr28        | 11710780 | 2             | 36 | C:0.777778        | CTT:0.222222 |
| chr28        | 11710832 | 3             | 38 | CAA:0.315789      | C:0.263158   |
| CA:0.421053  |          |               |    |                   |              |
| chr28        | 11710891 | 2             | 38 | GA:1 G:0          |              |
| chr28        | 11711092 | 2             | 38 | G:0.605263        | A:0.394737   |
| chr28        | 11711396 | 2             | 38 | G:0.631579        | A:0.368421   |
| chr28        | 11711437 | 2             | 36 | T:0.861111        | C:0.138889   |
| chr28        | 11711629 | 2             | 38 | G:1 A:0           |              |
| chr28        | 11711654 | 2             | 36 | T:0.416667        | C:0.583333   |
| chr28        | 11712607 | 2             | 40 | C:0.8 T:0.2       |              |
| chr28        | 11712708 | 2             | 38 | T:0.0263158       | C:0.973684   |
| chr28        | 11712782 | 2             | 38 | T:0.0263158       | G:0.973684   |
| chr28        | 11712968 | 2             | 38 | G:0.631579        | T:0.368421   |
| chr28        | 11713049 | 2             | 36 | C:0.0277778       | T:0.972222   |
| chr28        | 11713254 | 2             | 36 | T:0.694444        | C:0.305556   |
| chr28        | 11713386 | 2             | 36 | G:0.0555556       | A:0.944444   |
| chr28        | 11713631 | 2             | 34 | G:0.647059        | A:0.352941   |
| chr28        | 11713777 | 2             | 40 | A:0.95 G:0.05     |              |
| chr28        | 11713859 | 2             | 36 | G:0.388889        | A:0.611111   |
| chr28        | 11713863 | 2             | 38 | T:0.973684        | C:0.0263158  |
| chr28        | 11713956 | 2             | 38 | C:0.947368        | T:0.0526316  |
| chr28        | 11714060 | 2             | 40 | C:0.875 T:0.125   |              |
| chr28        | 11714110 | 2             | 38 | A:0.0526316       | G:0.947368   |

|                                       |              |    |                     |                  |
|---------------------------------------|--------------|----|---------------------|------------------|
| chr28                                 | 11714200 2   | 36 | T:0.666667          | A:0.333333       |
| chr28                                 | 11714236 2   | 36 | T:0.972222          | C:0.0277778      |
| chr28                                 | 11714550 2   | 38 | T:0.947368          | A:0.0526316      |
| chr28                                 | 11714751 2   | 38 | C:0.815789          | T:0.184211       |
| chr28                                 | 11715190 2   | 40 | C:0.775 T:0.225     |                  |
| chr28                                 | 11715237 2   | 38 | G:0.473684          | A:0.526316       |
| chr28                                 | 11715489 4   | 40 | ATGTG:0.65          | A:0.075 ATG:0.15 |
| ATGTGTG:0.125                         |              |    |                     |                  |
| chr28                                 | 11715586 2   | 36 | T:0.833333          | G:0.166667       |
| chr28                                 | 11715625 2   | 32 | G:0.78125           | GA:0.21875       |
| chr28                                 | 11715826 2   | 36 | A:1 T:0             |                  |
| chr28                                 | 11715885 7   | 38 | AACACACAC:0.289474  | A:               |
| 0.0789474                             | AAC:0.263158 |    | AACAC:0.157895      | AACACAC:0.157895 |
| AACACACACAC:0 AACACACACACAC:0.0526316 |              |    |                     |                  |
| chr28                                 | 11716376 2   | 36 | A:0.694444          | G:0.305556       |
| chr28                                 | 11716569 2   | 40 | C:0.275 T:0.725     |                  |
| chr28                                 | 11716825 2   | 40 | T:0.725 C:0.275     |                  |
| chr28                                 | 11717109 2   | 36 | C:0.805556          | G:0.194444       |
| chr28                                 | 11717110 2   | 40 | A:1 ACTGTTT:0       |                  |
| chr28                                 | 11717112 2   | 40 | A:1 T:0             |                  |
| chr28                                 | 11717115 2   | 40 | A:1 G:0             |                  |
| chr28                                 | 11717116 2   | 40 | T:1 TGTGTTCTGTTT:0  |                  |
| chr28                                 | 11717266 2   | 36 | A:0.388889          | G:0.611111       |
| chr28                                 | 11717510 2   | 40 | G:0.775 A:0.225     |                  |
| chr28                                 | 11717633 2   | 30 | A:0.666667          | G:0.333333       |
| chr28                                 | 11717756 2   | 32 | G:0.96875           | C:0.03125        |
| chr28                                 | 11717888 2   | 34 | C:0.735294          | T:0.264706       |
| chr28                                 | 11718368 2   | 40 | C:0.8 T:0.2         |                  |
| chr28                                 | 11718390 2   | 40 | C:0.825 T:0.175     |                  |
| chr28                                 | 11718504 2   | 38 | G:0.631579          | C:0.368421       |
| chr28                                 | 11718548 2   | 36 | C:0.777778          | T:0.222222       |
| chr28                                 | 11718549 2   | 36 | C:0.666667          | T:0.333333       |
| chr28                                 | 11718550 2   | 40 | C:0.675 T:0.325     |                  |
| chr28                                 | 11718551 2   | 40 | G:0.375 A:0.625     |                  |
| chr28                                 | 11718565 2   | 40 | G:0.375 A:0.625     |                  |
| chr28                                 | 11718678 2   | 36 | A:0.361111          | G:0.638889       |
| chr28                                 | 11718698 2   | 38 | C:0.763158          | T:0.236842       |
| chr28                                 | 11718916 2   | 38 | GA:0.763158         | G:0.236842       |
| chr28                                 | 11718940 2   | 40 | T:0.525 C:0.475     |                  |
| chr28                                 | 11719139 2   | 40 | G:0.625 GTCCA:0.375 |                  |
| chr28                                 | 11719152 2   | 40 | C:0.425 G:0.575     |                  |
| chr28                                 | 11719208 2   | 36 | G:0.555556          | A:0.444444       |
| chr28                                 | 11719240 2   | 36 | G:0.75 A:0.25       |                  |
| chr28                                 | 11719633 2   | 36 | G:0.722222          | A:0.277778       |
| chr28                                 | 11720081 2   | 40 | T:0.825 C:0.175     |                  |
| chr28                                 | 11720104 2   | 40 | G:1 A:0             |                  |
| chr28                                 | 11720159 2   | 36 | G:1 T:0             |                  |
| chr28                                 | 11720191 2   | 34 | A:0.558824          | G:0.441176       |
| chr28                                 | 11720353 2   | 38 | C:0.5 T:0.5         |                  |
| chr28                                 | 11720469 2   | 34 | G:0.441176          | A:0.558824       |
| chr28                                 | 11720544 2   | 40 | G:0.725 A:0.275     |                  |
| chr28                                 | 11720960 2   | 40 | A:0.825 T:0.175     |                  |
| chr28                                 | 11720994 2   | 40 | T:0.5 C:0.5         |                  |
| chr28                                 | 11721002 2   | 38 | A:0.736842          | G:0.263158       |

|       |            |    |                      |                 |
|-------|------------|----|----------------------|-----------------|
| chr28 | 11721029 2 | 38 | T:0.973684           | A:0.0263158     |
| chr28 | 11721260 2 | 40 | C:0.025 A:0.975      |                 |
| chr28 | 11721292 2 | 38 | C:0.789474           | G:0.210526      |
| chr28 | 11721367 2 | 36 | T:0.805556           | C:0.194444      |
| chr28 | 11721379 2 | 38 | C:0.763158           | T:0.236842      |
| chr28 | 11721484 2 | 36 | G:0.0277778          | A:0.972222      |
| chr28 | 11721567 2 | 38 | T:0.0526316          | C:0.947368      |
| chr28 | 11721850 2 | 38 | G:0.605263           | A:0.394737      |
| chr28 | 11722003 2 | 38 | G:0.815789           | A:0.184211      |
| chr28 | 11722131 2 | 38 | G:0.578947           | C:0.421053      |
| chr28 | 11722288 2 | 34 | C:0.0294118          | T:0.970588      |
| chr28 | 11722477 2 | 36 | A:0.861111           | G:0.138889      |
| chr28 | 11722478 2 | 36 | G:0.861111           | T:0.138889      |
| chr28 | 11722493 2 | 38 | C:0.789474           | A:0.210526      |
| chr28 | 11722659 2 | 40 | C:1 T:0              |                 |
| chr28 | 11722660 2 | 40 | A:0.6 G:0.4          |                 |
| chr28 | 11722665 2 | 40 | C:0.975 A:0.025      |                 |
| chr28 | 11722748 2 | 36 | TACTC:1 T:0          |                 |
| chr28 | 11723119 2 | 36 | G:0.694444           | T:0.305556      |
| chr28 | 11723198 2 | 38 | A:0.684211           | G:0.315789      |
| chr28 | 11723529 2 | 38 | G:0.526316           | A:0.473684      |
| chr28 | 11723617 2 | 36 | T:0.0277778          | C:0.972222      |
| chr28 | 11723841 2 | 34 | C:0.323529           | G:0.676471      |
| chr28 | 11724083 2 | 38 | CA:0.815789          | C:0.184211      |
| chr28 | 11724092 2 | 38 | C:0.815789           | T:0.184211      |
| chr28 | 11724129 2 | 40 | A:0.825 AGTAAT:0.175 |                 |
| chr28 | 11724174 2 | 38 | T:0.947368           | G:0.0526316     |
| chr28 | 11724300 2 | 40 | G:0.35 A:0.65        |                 |
| chr28 | 11724624 2 | 38 | A:0.868421           | ACACGG:0.131579 |
| chr28 | 11724765 2 | 36 | C:0.777778           | A:0.222222      |
| chr28 | 11724983 2 | 40 | G:0.4 A:0.6          |                 |
| chr28 | 11725122 2 | 36 | A:0.833333           | C:0.166667      |
| chr28 | 11725132 2 | 34 | G:0.5 GA:0.5         |                 |
| chr28 | 11725179 2 | 38 | A:0.289474           | G:0.710526      |
| chr28 | 11725348 2 | 36 | G:0.972222           | T:0.0277778     |
| chr28 | 11725375 2 | 38 | A:0.763158           | G:0.236842      |
| chr28 | 11725670 2 | 38 | C:0.789474           | G:0.210526      |
| chr28 | 11726126 2 | 38 | G:0.263158           | A:0.736842      |
| chr28 | 11726129 2 | 38 | A:0.763158           | G:0.236842      |
| chr28 | 11726369 2 | 34 | A:1 C:0              |                 |
| chr28 | 11726394 2 | 36 | A:0.583333           | C:0.416667      |
| chr28 | 11726402 2 | 36 | T:1 C:0              |                 |
| chr28 | 11726408 2 | 36 | G:0.333333           | A:0.666667      |
| chr28 | 11726499 2 | 38 | G:0.973684           | C:0.0263158     |
| chr28 | 11726540 2 | 34 | G:0.558824           | A:0.441176      |
| chr28 | 11726628 2 | 36 | C:0.972222           | T:0.0277778     |
| chr28 | 11726945 2 | 38 | T:0.815789           | C:0.184211      |
| chr28 | 11726980 2 | 40 | G:0.95 A:0.05        |                 |
| chr28 | 11727124 2 | 36 | A:0.333333           | AGTT:0.666667   |
| chr28 | 11727419 2 | 38 | A:0.0526316          | G:0.947368      |
| chr28 | 11727682 2 | 40 | G:0.975 C:0.025      |                 |
| chr28 | 11727699 2 | 40 | G:0.975 A:0.025      |                 |
| chr28 | 11727738 2 | 36 | A:0.333333           | T:0.666667      |
| chr28 | 11727777 2 | 40 | G:0.775 C:0.225      |                 |

|       |          |   |    |                 |             |
|-------|----------|---|----|-----------------|-------------|
| chr28 | 11727890 | 2 | 38 | CTTTAT:0.342105 | C:0.657895  |
| chr28 | 11727942 | 2 | 38 | G:0.526316      | C:0.473684  |
| chr28 | 11728046 | 2 | 34 | G:1             | A:0         |
| chr28 | 11728195 | 2 | 40 | G:1             | A:0         |
| chr28 | 11728438 | 2 | 32 | T:0.75          | C:0.25      |
| chr28 | 11728532 | 2 | 36 | T:0.75          | TA:0.25     |
| chr28 | 11728568 | 2 | 40 | T:0.55          | C:0.45      |
| chr28 | 11728934 | 2 | 38 | T:0             | C:1         |
| chr28 | 11728968 | 2 | 36 | G:0.694444      | A:0.305556  |
| chr28 | 11729059 | 2 | 36 | A:0.861111      | G:0.138889  |
| chr28 | 11729062 | 2 | 38 | AC:0.763158     | A:0.236842  |
| chr28 | 11729189 | 2 | 32 | A:0.09375       | G:0.90625   |
| chr28 | 11729208 | 2 | 30 | A:0.566667      | AT:0.433333 |
| chr28 | 11729336 | 2 | 34 | A:0.764706      | T:0.235294  |
| chr28 | 11729414 | 2 | 36 | A:0.722222      | AT:0.277778 |
| chr28 | 11729845 | 2 | 38 | G:0.815789      | GT:0.184211 |
| chr28 | 11729856 | 2 | 38 | C:0.815789      | T:0.184211  |
| chr28 | 11730457 | 2 | 40 | T:0.6           | A:0.4       |
| chr28 | 11730557 | 2 | 38 | C:0.605263      | A:0.394737  |
| chr28 | 11730558 | 2 | 38 | A:0.605263      | T:0.394737  |
| chr28 | 11730678 | 2 | 40 | G:1             | T:0         |
| chr28 | 11731028 | 2 | 34 | C:0.382353      | T:0.617647  |
| chr28 | 11731043 | 2 | 34 | AT:0.764706     | A:0.235294  |
| chr28 | 11731203 | 2 | 34 | A:0.735294      | G:0.264706  |
| chr28 | 11731384 | 2 | 28 | A:0.0357143     | C:0.964286  |
| chr28 | 11731464 | 2 | 38 | T:0.789474      | C:0.210526  |
| chr28 | 11731567 | 2 | 38 | A:0.710526      | G:0.289474  |
| chr28 | 11731671 | 2 | 38 | T:1             | C:0         |
| chr28 | 11731708 | 2 | 36 | G:0.638889      | A:0.361111  |
| chr28 | 11731739 | 2 | 38 | T:0.815789      | TA:0.184211 |
| chr28 | 11731740 | 2 | 38 | G:0.815789      | A:0.184211  |
| chr28 | 11731743 | 2 | 40 | G:0.75          | T:0.25      |
| chr28 | 11732347 | 2 | 38 | A:1             | C:0         |
| chr28 | 11732348 | 2 | 38 | G:1             | T:0         |
| chr28 | 11732452 | 2 | 34 | T:0.823529      | C:0.176471  |
| chr28 | 11732599 | 2 | 38 | C:0.842105      | T:0.157895  |
| chr28 | 11732701 | 2 | 34 | T:0.617647      | C:0.382353  |
| chr28 | 11732767 | 2 | 36 | G:0.805556      | A:0.194444  |
| chr28 | 11732838 | 2 | 36 | C:0.694444      | T:0.305556  |
| chr28 | 11732942 | 2 | 40 | A:0.625         | T:0.375     |
| chr28 | 11733290 | 2 | 40 | G:0.95          | A:0.05      |
| chr28 | 11733329 | 2 | 38 | A:0.0263158     | G:0.973684  |
| chr28 | 11733710 | 2 | 36 | T:0.0833333     | C:0.916667  |
| chr28 | 11733715 | 2 | 36 | T:0.805556      | C:0.194444  |
| chr28 | 11733775 | 2 | 34 | T:0.0588235     | C:0.941176  |
| chr28 | 11734031 | 2 | 40 | G:0.775         | A:0.225     |
| chr28 | 11734088 | 2 | 40 | T:0.9           | G:0.1       |
| chr28 | 11734722 | 2 | 38 | G:0.973684      | A:0.0263158 |
| chr28 | 11734753 | 2 | 38 | T:0.973684      | A:0.0263158 |
| chr28 | 11735153 | 2 | 38 | C:0.921053      | T:0.0789474 |
| chr28 | 11735175 | 2 | 38 | C:0.763158      | CT:0.236842 |
| chr28 | 11735301 | 2 | 36 | T:0.666667      | C:0.333333  |
| chr28 | 11735469 | 2 | 40 | T:1             | G:0         |
| chr28 | 11735580 | 2 | 36 | TC:0.805556     | T:0.194444  |

|                |          |   |    |                              |              |
|----------------|----------|---|----|------------------------------|--------------|
| chr28          | 11735631 | 2 | 36 | T:0.722222                   | G:0.277778   |
| chr28          | 11735638 | 2 | 36 | T:0.722222                   | A:0.277778   |
| chr28          | 11735692 | 2 | 40 | T:0.025                      | A:0.975      |
| chr28          | 11735701 | 2 | 40 | TAATGTCACTAAGTTTTG:0.75      | T:0.25       |
| chr28          | 11735782 | 2 | 40 | C:0.75                       | T:0.25       |
| chr28          | 11735932 | 2 | 38 | A:0.763158                   | C:0.236842   |
| chr28          | 11736011 | 2 | 38 | T:0.842105                   | G:0.157895   |
| chr28          | 11736058 | 3 | 40 | T:0.375                      | TA:0.45      |
| chr28          | 11736124 | 2 | 38 | G:0.789474                   | TAA:0.175    |
| chr28          | 11736154 | 2 | 40 | G:1                          | A:0          |
| chr28          | 11736271 | 2 | 38 | A:1                          | G:0          |
| chr28          | 11736327 | 2 | 36 | T:0.805556                   | C:0.194444   |
| chr28          | 11736399 | 2 | 34 | T:0.294118                   | C:0.705882   |
| chr28          | 11736492 | 2 | 34 | G:0.735294                   | A:0.264706   |
| chr28          | 11736637 | 2 | 36 | T:0.777778                   | A:0.222222   |
| chr28          | 11736659 | 2 | 34 | A:0.764706                   | T:0.235294   |
| chr28          | 11736793 | 2 | 38 | A:0.763158                   | G:0.236842   |
| chr28          | 11736832 | 2 | 36 | T:0.833333                   | G:0.166667   |
| chr28          | 11736989 | 2 | 36 | C:0.944444                   | A:0.0555556  |
| chr28          | 11737047 | 2 | 36 | G:0.0555556                  | A:0.944444   |
| chr28          | 11737114 | 2 | 34 | A:0.5                        | G:0.5        |
| chr28          | 11737167 | 2 | 36 | A:0.0555556                  | C:0.944444   |
| chr28          | 11737431 | 2 | 38 | T:1                          | G:0          |
| chr28          | 11737474 | 2 | 36 | C:0.722222                   | T:0.277778   |
| chr28          | 11737555 | 2 | 36 | C:0.75                       | T:0.25       |
| chr28          | 11737609 | 2 | 38 | T:0.815789                   | G:0.184211   |
| chr28          | 11737704 | 2 | 36 | C:1                          | T:0          |
| chr28          | 11737793 | 2 | 38 | A:1                          | G:0          |
| chr28          | 11737835 | 2 | 40 | C:0.55                       | T:0.45       |
| chr28          | 11737943 | 2 | 38 | T:0.684211                   | C:0.315789   |
| chr28          | 11737988 | 2 | 32 | C:0.75                       | A:0.25       |
| chr28          | 11738674 | 2 | 36 | A:0.75                       | G:0.25       |
| chr28          | 11738714 | 2 | 34 | A:0.970588                   | G:0.0294118  |
| chr28          | 11738894 | 2 | 36 | T:0.944444                   | C:0.0555556  |
| chr28          | 11738992 | 2 | 40 | G:0.825                      | C:0.175      |
| chr28          | 11739053 | 2 | 40 | C:0.875                      | T:0.125      |
| chr28          | 11739304 | 2 | 36 | G:0.694444                   | A:0.305556   |
| chr28          | 11739353 | 2 | 36 | C:0.861111                   | CTG:0.138889 |
| chr28          | 11739355 | 4 | 36 | C:0.527778                   | G:0.138889   |
| CTCTG:0.333333 |          |   |    | CTGTG:0                      |              |
| chr28          | 11739443 | 2 | 38 | A:0                          | G:1          |
| chr28          | 11739473 | 2 | 32 | T:0.71875                    | C:0.28125    |
| chr28          | 11739475 | 2 | 32 | G:0.71875                    | A:0.28125    |
| chr28          | 11739534 | 3 | 40 | CCT:0.775                    | C:0.025      |
| 0.2            |          |   |    | CCTCTCT:                     |              |
| chr28          | 11739570 | 2 | 40 | A:0.7                        | G:0.3        |
| chr28          | 11739571 | 3 | 40 | TAAAAATTAATAAAAAAACTTAAAAAA: | 0.375        |
| T:0.475        |          |   |    | TAAAATTAATAAAAAAACTTAAAAAA:  |              |
| chr28          | 11739579 | 2 | 40 | AAAAAAAATTAATAAAAAAAATT:     | 0.55         |
| A:0.45         |          |   |    |                              |              |
| chr28          | 11739721 | 2 | 32 | A:0.75                       | AAG:0.25     |
| chr28          | 11739753 | 2 | 34 | G:0.941176                   | A:0.0588235  |
| chr28          | 11739762 | 2 | 34 | A:0.647059                   | T:0.352941   |
| chr28          | 11739763 | 2 | 34 | G:0.647059                   | A:0.352941   |

|       |          |   |    |             |            |                |
|-------|----------|---|----|-------------|------------|----------------|
| chr28 | 11739831 | 2 | 40 | T:0.7       | C:0.3      |                |
| chr28 | 11739926 | 2 | 36 | G:0.444444  |            | T:0.555556     |
| chr28 | 11740697 | 2 | 38 | A:0.368421  |            | C:0.631579     |
| chr28 | 11740934 | 2 | 38 | T:0.815789  |            | A:0.184211     |
| chr28 | 11741024 | 2 | 32 | C:0.75      | T:0.25     |                |
| chr28 | 11741241 | 2 | 34 | C:1         | T:0        |                |
| chr28 | 11742019 | 2 | 38 | G:0.631579  |            | A:0.368421     |
| chr28 | 11742044 | 2 | 38 | T:0.0526316 |            | G:0.947368     |
| chr28 | 11742213 | 2 | 38 | T:0.578947  |            | C:0.421053     |
| chr28 | 11742283 | 2 | 34 | C:0.705882  |            | T:0.294118     |
| chr28 | 11742362 | 2 | 40 | T:1         | C:0        |                |
| chr28 | 11742433 | 2 | 38 | C:0.552632  |            | G:0.447368     |
| chr28 | 11742883 | 2 | 36 | G:0.666667  |            | A:0.333333     |
| chr28 | 11743015 | 2 | 34 | A:1         | C:0        |                |
| chr28 | 11743065 | 2 | 38 | G:0.210526  |            | A:0.789474     |
| chr28 | 11743074 | 2 | 38 | C:0.842105  |            | T:0.157895     |
| chr28 | 11743156 | 2 | 32 | C:0.96875   |            | T:0.03125      |
| chr28 | 11743195 | 2 | 38 | A:0.868421  |            | C:0.131579     |
| chr28 | 11743291 | 2 | 34 | G:0.205882  |            | A:0.794118     |
| chr28 | 11743363 | 2 | 34 | T:0.852941  |            | C:0.147059     |
| chr28 | 11743412 | 2 | 36 | T:0.944444  |            | C:0.0555556    |
| chr28 | 11743534 | 2 | 32 | C:0.25      | T:0.75     |                |
| chr28 | 11743595 | 2 | 34 | T:0.205882  |            | C:0.794118     |
| chr28 | 11743633 | 2 | 28 | C:0.714286  |            | T:0.285714     |
| chr28 | 11743739 | 2 | 38 | C:0.263158  |            | T:0.736842     |
| chr28 | 11743856 | 2 | 36 | C:0.222222  |            | T:0.777778     |
| chr28 | 11743871 | 2 | 34 | C:0         | G:1        |                |
| chr28 | 11744902 | 2 | 34 | T:1         | C:0        |                |
| chr28 | 11745129 | 2 | 34 | G:0.823529  |            | A:0.176471     |
| chr28 | 11745150 | 2 | 34 | C:0.764706  |            | T:0.235294     |
| chr28 | 11745153 | 2 | 34 | G:0.294118  |            | A:0.705882     |
| chr28 | 11745162 | 2 | 36 | A:1         | C:0        |                |
| chr28 | 11745296 | 2 | 40 | G:0.05      | A:0.95     |                |
| chr28 | 11745342 | 2 | 36 | C:0.777778  |            | CT:0.222222    |
| chr28 | 11745693 | 2 | 40 | A:0.75      | T:0.25     |                |
| chr28 | 11745711 | 2 | 38 | G:0.0526316 |            | A:0.947368     |
| chr28 | 11745848 | 2 | 38 | A:0.0789474 |            | C:0.921053     |
| chr28 | 11745895 | 2 | 40 | C:0.475     | G:0.525    |                |
| chr28 | 11746260 | 2 | 40 | C:0.75      | A:0.25     |                |
| chr28 | 11746288 | 2 | 40 | A:0.025     | ATCT:0.975 |                |
| chr28 | 11746398 | 2 | 36 | C:0.0833333 |            | T:0.916667     |
| chr28 | 11746450 | 2 | 38 | G:0.0526316 |            | A:0.947368     |
| chr28 | 11746455 | 2 | 38 | C:0.0526316 |            | T:0.947368     |
| chr28 | 11746530 | 2 | 38 | A:0.0526316 |            | G:0.947368     |
| chr28 | 11746608 | 2 | 36 | C:0.861111  |            | T:0.138889     |
| chr28 | 11746624 | 2 | 40 | T:0.05      | C:0.95     |                |
| chr28 | 11746672 | 2 | 38 | T:0.815789  |            | C:0.184211     |
| chr28 | 11746701 | 2 | 38 | A:0.263158  |            | G:0.736842     |
| chr28 | 11746769 | 2 | 38 | T:0.736842  |            | TAGAC:0.263158 |
| chr28 | 11746774 | 2 | 38 | A:0.315789  |            | C:0.684211     |
| chr28 | 11746779 | 2 | 38 | T:0.0526316 |            | C:0.947368     |
| chr28 | 11746815 | 2 | 40 | G:0.8       | GC:0.2     |                |
| chr28 | 11746863 | 2 | 40 | T:0.1       | G:0.9      |                |
| chr28 | 11747207 | 2 | 34 | T:0.970588  |            | C:0.0294118    |



|       |          |   |    |             |               |
|-------|----------|---|----|-------------|---------------|
| chr28 | 11747361 | 2 | 34 | T:0.382353  | C:0.617647    |
| chr28 | 11747383 | 2 | 32 | C:0.40625   | T:0.59375     |
| chr28 | 11747404 | 2 | 34 | A:0.382353  | C:0.617647    |
| chr28 | 11747492 | 2 | 34 | T:0.529412  | C:0.470588    |
| chr28 | 11747632 | 2 | 38 | G:0.763158  | T:0.236842    |
| chr28 | 11747678 | 2 | 40 | A:0.8       | G:0.2         |
| chr28 | 11747686 | 2 | 40 | C:1         | T:0           |
| chr28 | 11747705 | 2 | 38 | G:0.815789  | A:0.184211    |
| chr28 | 11747918 | 2 | 38 | C:0.815789  | T:0.184211    |
| chr28 | 11748026 | 2 | 40 | A:0.825     | G:0.175       |
| chr28 | 11748041 | 2 | 38 | T:0.5       | C:0.5         |
| chr28 | 11748103 | 2 | 40 | C:0.8       | A:0.2         |
| chr28 | 11748179 | 2 | 40 | G:0.775     | A:0.225       |
| chr28 | 11748287 | 2 | 38 | T:0.657895  | A:0.342105    |
| chr28 | 11748536 | 2 | 36 | A:0.805556  | C:0.194444    |
| chr28 | 11748543 | 2 | 40 | TA:0.675    | T:0.325       |
| chr28 | 11748559 | 2 | 40 | G:0.675     | T:0.325       |
| chr28 | 11748669 | 2 | 36 | A:0.805556  | T:0.194444    |
| chr28 | 11748694 | 2 | 36 | C:0.805556  | T:0.194444    |
| chr28 | 11748695 | 2 | 34 | T:0.411765  | A:0.588235    |
| chr28 | 11748760 | 2 | 36 | G:0.777778  | T:0.222222    |
| chr28 | 11748768 | 2 | 36 | A:0.777778  | T:0.222222    |
| chr28 | 11748817 | 2 | 36 | C:0.694444  | T:0.305556    |
| chr28 | 11748826 | 2 | 38 | T:0.789474  | C:0.210526    |
| chr28 | 11749230 | 2 | 36 | TC:0.805556 | T:0.194444    |
| chr28 | 11749346 | 2 | 38 | A:0.0263158 | T:0.973684    |
| chr28 | 11749371 | 2 | 38 | T:0.526316  | TGTC:0.473684 |
| chr28 | 11749403 | 2 | 36 | T:0.5       | C:0.5         |
| chr28 | 11749624 | 2 | 36 | AT:0.833333 | A:0.166667    |
| chr28 | 11749767 | 2 | 38 | C:0.736842  | T:0.263158    |
| chr28 | 11750075 | 2 | 40 | G:0.5       | T:0.5         |
| chr28 | 11750108 | 2 | 40 | C:0.65      | T:0.35        |
| chr28 | 11750118 | 2 | 40 | G:0.65      | A:0.35        |
| chr28 | 11750298 | 2 | 38 | A:0.842105  | T:0.157895    |
| chr28 | 11750397 | 2 | 40 | G:0.5       | T:0.5         |
| chr28 | 11750477 | 2 | 40 | A:0.6       | C:0.4         |
| chr28 | 11750496 | 2 | 36 | T:0.583333  | G:0.416667    |
| chr28 | 11750714 | 2 | 34 | C:0.823529  | T:0.176471    |
| chr28 | 11750793 | 2 | 36 | T:0.833333  | G:0.166667    |
| chr28 | 11751106 | 2 | 40 | C:1         | T:0           |
| chr28 | 11751221 | 2 | 40 | AACTC:0.75  | A:0.25        |
| chr28 | 11751359 | 2 | 38 | C:0.447368  | T:0.552632    |
| chr28 | 11751412 | 2 | 38 | A:0.473684  | G:0.526316    |
| chr28 | 11751632 | 2 | 34 | C:1         | G:0           |
| chr28 | 11751640 | 2 | 34 | C:1         | A:0           |
| chr28 | 11751707 | 2 | 32 | G:0.625     | C:0.375       |
| chr28 | 11751732 | 2 | 32 | A:0.9375    | G:0.0625      |
| chr28 | 11751741 | 2 | 34 | A:0.735294  | G:0.264706    |
| chr28 | 11751847 | 2 | 32 | C:0.71875   | CT:0.28125    |
| chr28 | 11751848 | 2 | 34 | T:1         | C:0           |
| chr28 | 11752068 | 2 | 38 | G:0.710526  | A:0.289474    |
| chr28 | 11752096 | 2 | 40 | T:0.7       | A:0.3         |
| chr28 | 11752211 | 2 | 40 | G:0.975     | A:0.025       |
| chr28 | 11752340 | 2 | 36 | A:0.666667  | G:0.333333    |

|       |          |   |    |                   |            |             |
|-------|----------|---|----|-------------------|------------|-------------|
| chr28 | 11752566 | 2 | 40 | TGTTTTTTTG:0.975  | T:0.025    |             |
| chr28 | 11752614 | 2 | 34 | ATTTATTT:0.205882 |            | A:          |
|       | 0.794118 |   |    |                   |            |             |
| chr28 | 11752954 | 2 | 38 | T:0.710526        |            | C:0.289474  |
| chr28 | 11752959 | 2 | 38 | T:0               | TA:1       |             |
| chr28 | 11752992 | 2 | 40 | T:0               | C:1        |             |
| chr28 | 11752993 | 2 | 40 | G:0               | T:1        |             |
| chr28 | 11752996 | 2 | 40 | TA:0              | T:1        |             |
| chr28 | 11753001 | 2 | 40 | A:0               | AT:1       |             |
| chr28 | 11753011 | 2 | 40 | C:0               | T:1        |             |
| chr28 | 11753023 | 2 | 40 | C:0               | CT:1       |             |
| chr28 | 11753061 | 2 | 36 | T:0               | C:1        |             |
| chr28 | 11753063 | 2 | 36 | G:0               | T:1        |             |
| chr28 | 11753067 | 2 | 36 | A:0               | AT:1       |             |
| chr28 | 11753073 | 2 | 36 | C:0               | CCTAA:1    |             |
| chr28 | 11753075 | 2 | 36 | G:0               | A:1        |             |
| chr28 | 11753077 | 2 | 36 | ATAT:0            | A:1        |             |
| chr28 | 11753083 | 2 | 36 | G:0               | GT:1       |             |
| chr28 | 11753088 | 2 | 36 | ATT:0             | A:1        |             |
| chr28 | 11753192 | 2 | 32 | C:0.71875         |            | T:0.28125   |
| chr28 | 11753196 | 2 | 32 | T:1               | C:0        |             |
| chr28 | 11753328 | 2 | 38 | G:0.0263158       |            | A:0.973684  |
| chr28 | 11753366 | 2 | 38 | C:0.789474        |            | G:0.210526  |
| chr28 | 11753433 | 2 | 40 | T:0.35            | G:0.65     |             |
| chr28 | 11753690 | 2 | 38 | C:0.710526        |            | T:0.289474  |
| chr28 | 11753833 | 2 | 40 | A:0.725           | G:0.275    |             |
| chr28 | 11753862 | 2 | 40 | TTA:0.7           | T:0.3      |             |
| chr28 | 11753866 | 2 | 40 | T:0.7             | TCA:0.3    |             |
| chr28 | 11753971 | 2 | 40 | T:0.7             | A:0.3      |             |
| chr28 | 11753989 | 2 | 40 | C:0.7             | T:0.3      |             |
| chr28 | 11754013 | 2 | 40 | G:0.7             | A:0.3      |             |
| chr28 | 11754054 | 2 | 38 | C:1               | T:0        |             |
| chr28 | 11754316 | 2 | 40 | C:0.975           | T:0.025    |             |
| chr28 | 11754371 | 2 | 38 | T:0.973684        |            | G:0.0263158 |
| chr28 | 11754373 | 2 | 40 | C:0.025           | T:0.975    |             |
| chr28 | 11754464 | 2 | 40 | A:0.975           | G:0.025    |             |
| chr28 | 11754469 | 2 | 40 | G:0.75            | A:0.25     |             |
| chr28 | 11754654 | 2 | 36 | G:0.694444        |            | A:0.305556  |
| chr28 | 11754906 | 2 | 28 | A:0.75            | G:0.25     |             |
| chr28 | 11755001 | 2 | 26 | G:0               | A:1        |             |
| chr28 | 11755008 | 2 | 22 | G:0.181818        |            | A:0.818182  |
| chr28 | 11755023 | 2 | 22 | AG:0.181818       |            | A:0.818182  |
| chr28 | 11755177 | 2 | 34 | A:0.0294118       |            | C:0.970588  |
| chr28 | 11755253 | 2 | 38 | C:0.710526        |            | A:0.289474  |
| chr28 | 11755303 | 2 | 36 | T:0.722222        |            | C:0.277778  |
| chr28 | 11755430 | 2 | 40 | T:0.7             | TTTGTA:0.3 |             |
| chr28 | 11755523 | 2 | 38 | AT:0.710526       |            | A:0.289474  |
| chr28 | 11755599 | 2 | 38 | A:0.973684        |            | G:0.0263158 |
| chr28 | 11755688 | 2 | 36 | G:0.805556        |            | A:0.194444  |
| chr28 | 11755801 | 2 | 38 | T:0.973684        |            | C:0.0263158 |
| chr28 | 11755835 | 2 | 40 | TCAGTCCC:0.725    |            | T:0.275     |
| chr28 | 11755867 | 2 | 40 | G:0.725           | C:0.275    |             |
| chr28 | 11755935 | 2 | 38 | C:0.684211        |            | T:0.315789  |
| chr28 | 11756119 | 2 | 36 | T:0.777778        |            | C:0.222222  |

|       |           |                          |    |                        |                  |
|-------|-----------|--------------------------|----|------------------------|------------------|
| chr28 | 11756130  | 2                        | 36 | T:0.722222             | C:0.277778       |
| chr28 | 11756251  | 2                        | 36 | C:0.694444             | T:0.305556       |
| chr28 | 11756326  | 2                        | 36 | C:0.694444             | G:0.305556       |
| chr28 | 11756376  | 2                        | 34 | G:0.823529             | A:0.176471       |
| chr28 | 11756482  | 2                        | 40 | C:0.7 CT:0.3           |                  |
| chr28 | 11756520  | 2                        | 40 | T:0.975 C:0.025        |                  |
| chr28 | 11756606  | 2                        | 34 | T:0.676471             | C:0.323529       |
| chr28 | 11756788  | 2                        | 40 | C:1 A:0                |                  |
| chr28 | 11756847  | 2                        | 38 | A:0.973684             | G:0.0263158      |
| chr28 | 11756853  | 2                        | 38 | A:0.710526             | G:0.289474       |
| chr28 | 11756973  | 2                        | 36 | G:0.722222             | T:0.277778       |
| chr28 | 11757038  | 2                        | 38 | A:0.973684             | G:0.0263158      |
| chr28 | 11757176  | 2                        | 40 | T:0.975 C:0.025        |                  |
| chr28 | 11757276  | 2                        | 38 | A:1 C:0                |                  |
| chr28 | 11757417  | 2                        | 34 | TG:0.735294            | T:0.264706       |
| chr28 | 11757428  | 2                        | 34 | G:0.735294             | A:0.264706       |
| chr28 | 11757535  | 2                        | 38 | T:0.684211             | C:0.315789       |
| chr28 | 11757544  | 2                        | 38 | G:0.684211             | A:0.315789       |
| chr28 | 11757665  | 2                        | 38 | G:1 T:0                |                  |
| chr28 | 11757782  | 2                        | 38 | G:0.736842             | A:0.263158       |
| chr28 | 11757820  | 2                        | 38 | C:1 T:0                |                  |
| chr28 | 11757837  | 2                        | 38 | T:0.736842             | A:0.263158       |
| chr28 | 11757933  | 2                        | 38 | C:0.710526             | T:0.289474       |
| chr28 | 11757943  | 2                        | 38 | A:1 G:0                |                  |
| chr28 | 11758254  | 2                        | 32 | C:0.71875              | T:0.28125        |
| chr28 | 11758292  | 2                        | 40 | TA:0.75 T:0.25         |                  |
| chr28 | 11758421  | 2                        | 34 | A:0.705882             | G:0.294118       |
| chr28 | 11758542  | 7                        | 36 | TTATATATA:0.194444     | T:               |
|       | 0.361111  | TTA:0.0555556            |    | TTATA:0.0277778        | TTATATA:0.222222 |
|       |           | TTATATATATA:0.0277778    |    | TTATATATATATA:0.111111 |                  |
| chr28 | 11758583  | 2                        | 32 | G:0.78125              | A:0.21875        |
| chr28 | 11758654  | 2                        | 36 | A:0.722222             | G:0.277778       |
| chr28 | 11758731  | 2                        | 32 | AC:0.96875             | A:0.03125        |
| chr28 | 11758736  | 2                        | 32 | A:0.96875              | AG:0.03125       |
| chr28 | 11758846  | 2                        | 32 | AC:1 A:0               |                  |
| chr28 | 11759155  | 2                        | 28 | A:0.535714             | G:0.464286       |
| chr28 | 11759257  | 2                        | 32 | AG:0.78125             | A:0.21875        |
| chr28 | 11759580  | 2                        | 36 | G:1 GTA:0              |                  |
| chr28 | 11759626  | 2                        | 36 | T:0.972222             | TGTA:0.0277778   |
| chr28 | 11759633  | 3                        | 38 | T:0.684211             | TAGATTAGA:       |
|       | 0.0263158 | TAGATTAGATAGATAGATAGATA: |    | 0.289474               |                  |
| chr28 | 11759650  | 2                        | 38 | T:1 TAG:0              |                  |
| chr28 | 11759652  | 2                        | 38 | T:1 TAGA:0             |                  |
| chr28 | 11759654  | 2                        | 38 | G:1 A:0                |                  |
| chr28 | 11759656  | 2                        | 38 | C:1 A:0                |                  |
| chr28 | 11759659  | 2                        | 38 | T:1 G:0                |                  |
| chr28 | 11759663  | 2                        | 38 | T:1 G:0                |                  |
| chr28 | 11759666  | 2                        | 38 | A:1 ATTGG:0            |                  |
| chr28 | 11759678  | 2                        | 38 | CATTG:1 C:0            |                  |
| chr28 | 11759687  | 2                        | 38 | TATGTG:1 T:0           |                  |
| chr28 | 11759696  | 2                        | 38 | G:0.684211             | A:0.315789       |
| chr28 | 11759783  | 2                        | 38 | T:0.763158             | C:0.236842       |
| chr28 | 11759800  | 2                        | 36 | C:0.944444             | T:0.0555556      |
| chr28 | 11759894  | 2                        | 38 | AT:0.657895            | A:0.342105       |

|                       |          |   |    |                   |                     |               |
|-----------------------|----------|---|----|-------------------|---------------------|---------------|
| chr28                 | 11759944 | 2 | 40 | T:0.975           | C:0.025             |               |
| chr28                 | 11760019 | 2 | 34 | C:0.970588        |                     | CA:0.0294118  |
| chr28                 | 11760300 | 2 | 40 | C:0.975           | T:0.025             |               |
| chr28                 | 11760339 | 2 | 38 | A:0.763158        |                     | G:0.236842    |
| chr28                 | 11760449 | 2 | 40 | C:0.75            | T:0.25              |               |
| chr28                 | 11760463 | 2 | 40 | C:0.75            | T:0.25              |               |
| chr28                 | 11760472 | 2 | 40 | A:0.75            | T:0.25              |               |
| chr28                 | 11760557 | 2 | 40 | T:0.7             | C:0.3               |               |
| chr28                 | 11760585 | 2 | 40 | A:0.725           | G:0.275             |               |
| chr28                 | 11760624 | 2 | 40 | T:0.975           | C:0.025             |               |
| chr28                 | 11760663 | 2 | 38 | C:1               | CTTTT:0             |               |
| chr28                 | 11760665 | 2 | 38 | T:0.842105        |                     | TTTC:0.157895 |
| chr28                 | 11760699 | 3 | 38 | C:0.710526        |                     | G:0.0526316   |
| CAG:0.236842          |          |   |    |                   |                     |               |
| chr28                 | 11760752 | 2 | 38 | C:0.973684        |                     | T:0.0263158   |
| chr28                 | 11760779 | 2 | 38 | C:0.736842        |                     | A:0.263158    |
| chr28                 | 11760781 | 2 | 38 | C:0.973684        |                     | T:0.0263158   |
| chr28                 | 11760813 | 2 | 36 | C:1               | T:0                 |               |
| chr28                 | 11760906 | 2 | 36 | A:0.722222        |                     | G:0.277778    |
| chr28                 | 11760940 | 2 | 38 | C:0.736842        |                     | T:0.263158    |
| chr28                 | 11761008 | 2 | 38 | C:0.947368        |                     | T:0.0526316   |
| chr28                 | 11761240 | 2 | 40 | G:0.7             | A:0.3               |               |
| chr28                 | 11761340 | 2 | 36 | A:0.638889        |                     | G:0.361111    |
| chr28                 | 11761480 | 2 | 38 | C:0.973684        |                     | T:0.0263158   |
| chr28                 | 11761669 | 2 | 34 | C:0.970588        |                     | A:0.0294118   |
| chr28                 | 11761738 | 2 | 40 | T:0.7             | C:0.3               |               |
| chr28                 | 11761758 | 2 | 40 | T:1               | TAATAATCATTTTAAAA:0 |               |
| chr28                 | 11761798 | 2 | 40 | CAT:0.975         |                     | C:0.025       |
| chr28                 | 11762033 | 2 | 40 | C:0.95            | T:0.05              |               |
| chr28                 | 11762488 | 2 | 38 | G:0.973684        |                     | A:0.0263158   |
| chr28                 | 11762505 | 2 | 38 | A:0.973684        |                     | G:0.0263158   |
| chr28                 | 11762679 | 2 | 40 | CCA:1             | C:0                 |               |
| chr28                 | 11762724 | 2 | 38 | A:0.973684        |                     | G:0.0263158   |
| chr28                 | 11762764 | 4 | 40 | TACACACACACAC:0.3 |                     | T:0.175       |
| TACACACACACACAC:0.425 |          |   |    |                   |                     |               |
| TACACACACACACACAC:0.1 |          |   |    |                   |                     |               |
| chr28                 | 11762802 | 2 | 40 | C:0.95            | T:0.05              |               |
| chr28                 | 11762821 | 2 | 36 | G:0.777778        |                     | A:0.222222    |
| chr28                 | 11762873 | 2 | 38 | G:0.973684        |                     | A:0.0263158   |
| chr28                 | 11763027 | 2 | 36 | A:0.666667        |                     | ACT:0.333333  |
| chr28                 | 11763144 | 2 | 36 | A:1               | C:0                 |               |
| chr28                 | 11763213 | 2 | 38 | A:0.710526        |                     | C:0.289474    |
| chr28                 | 11763216 | 2 | 38 | T:1               | A:0                 |               |
| chr28                 | 11763384 | 2 | 40 | G:1               | T:0                 |               |
| chr28                 | 11763486 | 2 | 34 | T:1               | A:0                 |               |
| chr28                 | 11763540 | 2 | 34 | C:0.0294118       |                     | A:0.970588    |
| chr28                 | 11763601 | 2 | 40 | C:0.7             | G:0.3               |               |
| chr28                 | 11763663 | 2 | 38 | TTTC:0.868421     |                     | T:0.131579    |
| chr28                 | 11763713 | 2 | 38 | G:0.368421        |                     | C:0.631579    |
| chr28                 | 11763777 | 2 | 38 | G:0.947368        |                     | A:0.0526316   |
| chr28                 | 11764044 | 2 | 32 | A:0.9375          | G:0.0625            |               |
| chr28                 | 11764060 | 2 | 32 | T:0.5625          | G:0.4375            |               |
| chr28                 | 11764519 | 2 | 28 | T:1               | C:0                 |               |
| chr28                 | 11764552 | 2 | 34 | G:1               | A:0                 |               |
| chr28                 | 11764590 | 2 | 34 | TG:0.323529       |                     | T:0.676471    |

|       |          |                  |                           |                        |                         |
|-------|----------|------------------|---------------------------|------------------------|-------------------------|
| chr28 | 11764592 | 2                | 34                        | GTTT:0.823529          | G:0.176471              |
| chr28 | 11764890 | 2                | 40                        | T:0.975                | TAAG:0.025              |
| chr28 | 11765223 | 2                | 36                        | AATC:0.944444          | A:0.0555556             |
| chr28 | 11765369 | 2                | 34                        | C:0.970588             | A:0.0294118             |
| chr28 | 11765425 | 2                | 38                        | C:0.789474             | T:0.210526              |
| chr28 | 11765464 | 2                | 40                        | A:0.975                | ATTATTTTTTATTTTATTATTT: |
|       | 0.025    |                  |                           |                        |                         |
| chr28 | 11765465 | 2                | 40                        | C:0.975                | CATTAAATTATTTTAAT:0.025 |
| chr28 | 11765466 | 2                | 40                        | C:0.975                | T:0.025                 |
| chr28 | 11765518 | 2                | 36                        | T:0.972222             | C:0.0277778             |
| chr28 | 11765627 | 2                | 40                        | C:1                    | T:0                     |
| chr28 | 11765879 | 2                | 38                        | G:0.710526             | T:0.289474              |
| chr28 | 11766056 | 2                | 34                        | A:0.970588             | C:0.0294118             |
| chr28 | 11766099 | 2                | 38                        | A:0.315789             | C:0.684211              |
| chr28 | 11766106 | 2                | 38                        | T:0.973684             | G:0.0263158             |
| chr28 | 11766189 | 2                | 34                        | A:0.970588             | T:0.0294118             |
| chr28 | 11766254 | 2                | 32                        | A:0.34375              | G:0.65625               |
| chr28 | 11766328 | 4                | 38                        | AAGAGAGAG:0.0789474    | A:                      |
|       | 0.105263 | AAGAGAG:0.789474 | AAGAGAGAGAGAGAG:0.0263158 |                        |                         |
| chr28 | 11766490 | 2                | 36                        | CTTTTTTTTTTTT:0.527778 | C:                      |
|       | 0.472222 |                  |                           |                        |                         |
| chr28 | 11766584 | 2                | 34                        | C:0.617647             | T:0.382353              |
| chr28 | 11766717 | 2                | 40                        | A:0.95                 | G:0.05                  |
| chr28 | 11767154 | 2                | 38                        | G:0.736842             | T:0.263158              |
| chr28 | 11767267 | 2                | 40                        | G:0.975                | A:0.025                 |
| chr28 | 11767311 | 2                | 36                        | A:0.222222             | G:0.777778              |
| chr28 | 11767397 | 2                | 38                        | C:0.973684             | T:0.0263158             |
| chr28 | 11767479 | 2                | 40                        | A:0.95                 | G:0.05                  |
| chr28 | 11767489 | 2                | 40                        | G:0.05                 | A:0.95                  |
| chr28 | 11767576 | 2                | 34                        | A:0.323529             | T:0.676471              |
| chr28 | 11767711 | 2                | 38                        | T:1                    | C:0                     |
| chr28 | 11767900 | 2                | 38                        | T:0.710526             | C:0.289474              |
| chr28 | 11768021 | 2                | 38                        | G:0.0263158            | GGAAA:0.973684          |
| chr28 | 11768093 | 2                | 38                        | T:0.973684             | C:0.0263158             |
| chr28 | 11768261 | 2                | 36                        | CA:0                   | C:1                     |
| chr28 | 11768466 | 2                | 34                        | C:0.970588             | G:0.0294118             |
| chr28 | 11768605 | 2                | 38                        | G:1                    | A:0                     |
| chr28 | 11768624 | 2                | 36                        | A:0.75                 | G:0.25                  |
| chr28 | 11768768 | 2                | 34                        | T:1                    | C:0                     |
| chr28 | 11768919 | 2                | 36                        | T:0.0277778            | A:0.972222              |
| chr28 | 11768996 | 2                | 36                        | A:0.944444             | G:0.0555556             |
| chr28 | 11769101 | 2                | 34                        | C:0.735294             | CTA:0.264706            |
| chr28 | 11769122 | 2                | 36                        | A:0.944444             | C:0.0555556             |
| chr28 | 11769341 | 2                | 38                        | C:1                    | A:0                     |
| chr28 | 11769666 | 2                | 36                        | TGGCTTTCCCAAGTAA:1     | T:0                     |
| chr28 | 11769689 | 2                | 36                        | C:0.916667             | A:0.0833333             |
| chr28 | 11769865 | 2                | 38                        | A:0.342105             | G:0.657895              |
| chr28 | 11770022 | 2                | 38                        | G:1                    | C:0                     |
| chr28 | 11770722 | 2                | 38                        | A:0                    | G:1                     |
| chr28 | 11770739 | 2                | 38                        | TG:0.736842            | T:0.263158              |
| chr28 | 11771238 | 2                | 38                        | C:0.973684             | CTTA:0.0263158          |
| chr28 | 11771240 | 2                | 38                        | T:0.0263158            | TATG:0.973684           |
| chr28 | 11771308 | 2                | 38                        | T:1                    | C:0                     |
| chr28 | 11771840 | 2                | 34                        | C:0.735294             | A:0.264706              |

|        |          |   |    |                             |              |
|--------|----------|---|----|-----------------------------|--------------|
| chr28  | 11772429 | 2 | 36 | G:0.972222                  | C:0.0277778  |
| chr28  | 11772502 | 2 | 38 | T:0.736842                  | G:0.263158   |
| chr28  | 11772564 | 2 | 34 | T:0.0294118                 | C:0.970588   |
| chr28  | 11772595 | 2 | 36 | AT:0.361111                 | A:0.638889   |
| chr28  | 11772603 | 2 | 36 | T:1                         | A:0          |
| chr28  | 11772715 | 2 | 38 | C:0.368421                  | A:0.631579   |
| chr28  | 11773090 | 2 | 34 | A:0.441176                  | C:0.558824   |
| chr28  | 11773354 | 2 | 36 | G:0.416667                  | A:0.583333   |
| chr28  | 11773427 | 2 | 38 | A:0.736842                  | G:0.263158   |
| chr28  | 11774005 | 2 | 38 | A:0.368421                  | C:0.631579   |
| chr28  | 11774216 | 2 | 36 | C:1                         | T:0          |
| chr28  | 11774403 | 2 | 36 | A:0.361111                  | G:0.638889   |
| chr28  | 11774797 | 2 | 38 | A:0.394737                  | T:0.605263   |
| chr28  | 11774834 | 2 | 40 | G:0.075                     | A:0.925      |
| chr28  | 11775084 | 2 | 38 | A:0.342105                  | G:0.657895   |
| chr28  | 11775145 | 2 | 38 | C:0.947368                  | T:0.0526316  |
| chr28  | 11775177 | 2 | 36 | GAATT:1                     | G:0          |
| chr28  | 11775270 | 2 | 36 | A:0.861111                  | G:0.138889   |
| chr28  | 11775358 | 2 | 36 | C:0.305556                  | T:0.694444   |
| chr28  | 11775428 | 2 | 38 | A:0.236842                  | G:0.763158   |
| chr28  | 11775447 | 2 | 38 | G:0.236842                  | T:0.763158   |
| chr28  | 11775501 | 2 | 36 | A:0.972222                  | G:0.0277778  |
| chr28  | 11775605 | 2 | 40 | G:0.35                      | T:0.65       |
| chr28  | 11775627 | 2 | 40 | T:0.35                      | C:0.65       |
| chr28  | 11775871 | 2 | 38 | A:0.342105                  | AC:0.657895  |
| chr28  | 11775945 | 2 | 38 | A:0.342105                  | G:0.657895   |
| chr28  | 11775964 | 2 | 38 | A:0.342105                  | T:0.657895   |
| chr28  | 11776095 | 2 | 40 | A:1                         | ATT:0        |
| chr28  | 11776097 | 2 | 40 | T:1                         | TTTAAAAG:0   |
| chr28  | 11776100 | 2 | 40 | A:1                         | AGTGATT:0    |
| chr28  | 11776103 | 2 | 40 | A:1                         | AAAGACAGTG:0 |
| chr28  | 11776147 | 2 | 38 | C:0.421053                  | T:0.578947   |
| chr28  | 11776163 | 2 | 38 | G:0.394737                  | A:0.605263   |
| chr28  | 11776184 | 2 | 36 | G:0.972222                  | A:0.0277778  |
| chr28  | 11776207 | 2 | 38 | C:0.368421                  | G:0.631579   |
| chr28  | 11776297 | 2 | 40 | T:0.35                      | C:0.65       |
| chr28  | 11776433 | 2 | 36 | T:0.388889                  | C:0.611111   |
| chr28  | 11776447 | 2 | 34 | A:0.352941                  | G:0.647059   |
| chr28  | 11777017 | 2 | 38 | C:0.0789474                 | T:0.921053   |
| chr28  | 11777084 | 2 | 38 | A:0.947368                  | G:0.0526316  |
| chr28  | 11777250 | 2 | 38 | G:0.0526316                 | A:0.947368   |
| chr28  | 11777374 | 2 | 40 | C:0.15                      | T:0.85       |
| chr28  | 11777375 | 2 | 40 | A:0.15                      | G:0.85       |
| chr28  | 11777393 | 2 | 40 | GTCGAGGAATGTTCCCTCTATC:0.15 |              |
| G:0.85 |          |   |    |                             |              |
| chr28  | 11777488 | 2 | 38 | G:0.105263                  | A:0.894737   |
| chr28  | 11777788 | 2 | 38 | C:1                         | G:0          |
| chr28  | 11777938 | 2 | 36 | C:0.166667                  | T:0.833333   |
| chr28  | 11777976 | 2 | 32 | TA:0.125                    | T:0.875      |
| chr28  | 11778017 | 2 | 30 | GC:1                        | G:0          |
| chr28  | 11778027 | 2 | 32 | C:1                         | CAA:0        |
| chr28  | 11778028 | 3 | 34 | C:0.176471                  | A:0.823529   |
| CAA:0  |          |   |    |                             |              |
| chr28  | 11778091 | 4 | 40 | CATTTTATTTTATTTTATTTT:0.45  |              |

|        |                 |                      |               |                     |
|--------|-----------------|----------------------|---------------|---------------------|
| C:0.05 | CATTTTATTTT:0.3 | CATTTTATTTTATTTT:0.2 |               |                     |
| chr28  | 11778217 2      | 32                   | C:1           | T:0                 |
| chr28  | 11778246 2      | 34                   | C:0.0882353   | T:0.911765          |
| chr28  | 11778341 2      | 38                   | A:1           | G:0                 |
| chr28  | 11778413 2      | 40                   | A:1           | G:0                 |
| chr28  | 11778532 2      | 38                   | G:1           | A:0                 |
| chr28  | 11778575 2      | 36                   | A:1           | C:0                 |
| chr28  | 11778602 2      | 30                   | T:0.1         | G:0.9               |
| chr28  | 11778783 2      | 36                   | C:1           | T:0                 |
| chr28  | 11778821 2      | 34                   | GCC:0.0882353 | G:0.911765          |
| chr28  | 11778825 2      | 34                   | C:1           | T:0                 |
| chr28  | 11779002 2      | 28                   | CATA:1        | C:0                 |
| chr28  | 11779171 2      | 40                   | G:0.725       | A:0.275             |
| chr28  | 11779249 2      | 38                   | G:0.0789474   | GAA:0.921053        |
| chr28  | 11779250 3      | 38                   | G:0           | A:0.921053          |
|        | 0.0789474       |                      |               | GA:                 |
| chr28  | 11779353 2      | 40                   | C:1           | T:0                 |
| chr28  | 11779410 2      | 36                   | T:1           | C:0                 |
| chr28  | 11779573 2      | 38                   | C:0.105263    | T:0.894737          |
| chr28  | 11779590 2      | 38                   | C:0.342105    | T:0.657895          |
| chr28  | 11780213 2      | 40                   | C:0.8         | T:0.2               |
| chr28  | 11780473 2      | 38                   | C:0.578947    | T:0.421053          |
| chr28  | 11780645 2      | 38                   | A:0.710526    | G:0.289474          |
| chr28  | 11780700 2      | 36                   | A:0.944444    | T:0.0555556         |
| chr28  | 11780841 2      | 38                   | C:0.789474    | T:0.210526          |
| chr28  | 11780901 2      | 36                   | G:0.805556    | A:0.194444          |
| chr28  | 11781118 2      | 36                   | C:0.75        | A:0.25              |
| chr28  | 11781195 2      | 34                   | A:0.264706    | C:0.735294          |
| chr28  | 11781246 2      | 36                   | T:0.777778    | G:0.222222          |
| chr28  | 11781633 2      | 40                   | G:0.025       | A:0.975             |
| chr28  | 11781671 2      | 38                   | T:1           | C:0                 |
| chr28  | 11781690 2      | 36                   | A:0.944444    | AT:0.0555556        |
| chr28  | 11782027 2      | 38                   | G:1           | C:0                 |
| chr28  | 11782187 2      | 40                   | A:0.75        | T:0.25              |
| chr28  | 11782207 2      | 40                   | A:0.775       | G:0.225             |
| chr28  | 11782276 2      | 38                   | G:0.710526    | A:0.289474          |
| chr28  | 11782293 2      | 38                   | G:0.657895    | A:0.342105          |
| chr28  | 11782738 2      | 40                   | T:0.6         | TGGGTCCCTGGGCTC:0.4 |
| chr28  | 11782739 2      | 40                   | AC:0.6        | A:0.4               |
| chr28  | 11782818 2      | 34                   | A:1           | G:0                 |
| chr28  | 11782888 2      | 38                   | T:0.710526    | A:0.289474          |
| chr28  | 11783074 2      | 34                   | C:0.823529    | CCT:0.176471        |
| chr28  | 11783132 3      | 40                   | A:0.35        | AAC:0.65 AACAC:0    |
| chr28  | 11783381 2      | 38                   | A:0.657895    | C:0.342105          |
| chr28  | 11783394 2      | 38                   | G:1           | A:0                 |
| chr28  | 11783522 2      | 38                   | A:0           | C:1                 |
| chr28  | 11783544 2      | 36                   | A:0.361111    | G:0.638889          |
| chr28  | 11783653 2      | 36                   | C:1           | T:0                 |
| chr28  | 11783726 2      | 38                   | T:0.947368    | G:0.0526316         |
| chr28  | 11783784 2      | 40                   | G:1           | A:0                 |
| chr28  | 11783812 4      | 38                   | T:0.605263    | TG:0.0526316        |
|        | TGGC:0.0526316  |                      |               | TGGCG:0.289474      |
| chr28  | 11783861 2      | 38                   | AT:0.421053   | A:0.578947          |
| chr28  | 11784019 2      | 38                   | G:0.315789    | A:0.684211          |

|                                                  |          |   |    |               |                     |
|--------------------------------------------------|----------|---|----|---------------|---------------------|
| chr28                                            | 11784285 | 2 | 38 | T:0.763158    | A:0.236842          |
| chr28                                            | 11784421 | 2 | 36 | A:0.694444    | T:0.305556          |
| chr28                                            | 11784430 | 2 | 36 | AT:0.611111   | A:0.388889          |
| chr28                                            | 11784451 | 2 | 38 | T:0.0263158   | G:0.973684          |
| chr28                                            | 11784754 | 2 | 38 | G:0.657895    | A:0.342105          |
| chr28                                            | 11784868 | 2 | 38 | G:0.763158    | A:0.236842          |
| chr28                                            | 11785165 | 2 | 38 | C:0.684211    | T:0.315789          |
| chr28                                            | 11785291 | 2 | 34 | A:0.705882    | C:0.294118          |
| chr28                                            | 11785317 | 2 | 36 | C:0.694444    | CT:0.305556         |
| chr28                                            | 11785352 | 2 | 40 | G:0.425       | A:0.575             |
| chr28                                            | 11785677 | 2 | 38 | G:0.657895    | T:0.342105          |
| chr28                                            | 11786110 | 2 | 38 | C:1           | T:0                 |
| chr28                                            | 11786350 | 2 | 38 | A:0.473684    | G:0.526316          |
| chr28                                            | 11786469 | 2 | 38 | C:0.657895    | A:0.342105          |
| chr28                                            | 11786795 | 2 | 38 | T:0.605263    | C:0.394737          |
| chr28                                            | 11787108 | 3 | 36 | C:0.611111    | CT:0.166667         |
| CTT:0.222222                                     |          |   |    |               |                     |
| chr28                                            | 11787247 | 2 | 38 | G:0.947368    | A:0.0526316         |
| chr28                                            | 11787410 | 2 | 40 | T:0.625       | C:0.375             |
| chr28                                            | 11787613 | 2 | 36 | T:0.694444    | G:0.305556          |
| chr28                                            | 11787775 | 2 | 38 | A:0.315789    | T:0.684211          |
| chr28                                            | 11787811 | 2 | 36 | AT:0.944444   | A:0.0555556         |
| chr28                                            | 11787840 | 2 | 34 | C:0.617647    | T:0.382353          |
| chr28                                            | 11788062 | 4 | 36 | CCT:0.611111  | C:0.0555556         |
| CCTCT:0.194444 CCTCTCT:0.138889                  |          |   |    |               |                     |
| chr28                                            | 11788087 | 3 | 36 | C:0.75        | CTG:0.25 CTCTG:0    |
| chr28                                            | 11788253 | 2 | 38 | G:0.947368    | A:0.0526316         |
| chr28                                            | 11788301 | 2 | 34 | A:1           | G:0                 |
| chr28                                            | 11788394 | 2 | 36 | G:0.972222    | A:0.0277778         |
| chr28                                            | 11788490 | 2 | 36 | C:0.805556    | G:0.194444          |
| chr28                                            | 11788587 | 2 | 38 | A:0.289474    | G:0.710526          |
| chr28                                            | 11788962 | 2 | 36 | CACA:0.944444 | C:0.0555556         |
| chr28                                            | 11788964 | 2 | 38 | C:0.842105    | T:0.157895          |
| chr28                                            | 11788967 | 7 | 40 | AAAAT:0.25    | A:0 TAAAT:          |
| 0.275 AAAATAAAT:0.125 AAAATAAATAAAT:0 ATAAAT:0.2 |          |   |    |               |                     |
| AAAATAAATAAATAAAT:0.15                           |          |   |    |               |                     |
| chr28                                            | 11789007 | 4 | 40 | T:0.475       | A:0.175 TAAAA:0.175 |
| TAAATAAAA:0.175                                  |          |   |    |               |                     |
| chr28                                            | 11789017 | 2 | 36 | T:0.916667    | A:0.0833333         |
| chr28                                            | 11789228 | 2 | 38 | CAG:0.631579  | C:0.368421          |
| chr28                                            | 11789273 | 2 | 40 | G:0.95        | A:0.05              |
| chr28                                            | 11789401 | 2 | 38 | C:0.868421    | CA:0.131579         |
| chr28                                            | 11789780 | 2 | 38 | C:0.736842    | T:0.263158          |
| chr28                                            | 11789807 | 2 | 40 | C:0.6         | T:0.4               |
| chr28                                            | 11789860 | 2 | 38 | A:0.605263    | T:0.394737          |
| chr28                                            | 11789949 | 2 | 40 | G:1           | GA:0                |
| chr28                                            | 11790376 | 2 | 36 | G:0.75        | T:0.25              |
| chr28                                            | 11790436 | 2 | 38 | A:1           | C:0                 |
| chr28                                            | 11790441 | 2 | 38 | G:1           | A:0                 |
| chr28                                            | 11790546 | 2 | 38 | G:0.0526316   | A:0.947368          |
| chr28                                            | 11790555 | 2 | 40 | C:0.6         | A:0.4               |
| chr28                                            | 11791122 | 2 | 38 | C:1           | T:0                 |
| chr28                                            | 11791647 | 2 | 38 | T:0.0526316   | C:0.947368          |
| chr28                                            | 11791873 | 2 | 38 | T:0           | C:1                 |



|                            |          |   |    |                    |              |
|----------------------------|----------|---|----|--------------------|--------------|
| chr28                      | 11791900 | 2 | 34 | C:0.588235         | T:0.411765   |
| chr28                      | 11793201 | 2 | 36 | C:0.694444         | T:0.305556   |
| chr28                      | 11793581 | 2 | 34 | C:1                | T:0          |
| chr28                      | 11793605 | 2 | 36 | G:1                | A:0          |
| chr28                      | 11793750 | 2 | 38 | A:0.605263         | AAG:0.394737 |
| chr28                      | 11793873 | 2 | 40 | A:0.025            | C:0.975      |
| chr28                      | 11793901 | 2 | 38 | AT:0.763158        | A:0.236842   |
| chr28                      | 11794282 | 2 | 38 | T:1                | C:0          |
| chr28                      | 11794300 | 2 | 40 | G:0.725            | T:0.275      |
| chr28                      | 11794318 | 2 | 40 | G:0.775            | T:0.225      |
| chr28                      | 11794971 | 2 | 36 | G:1                | A:0          |
| chr28                      | 11794979 | 2 | 34 | G:0                | A:1          |
| chr28                      | 11795991 | 2 | 38 | C:0.736842         | T:0.263158   |
| chr28                      | 11796018 | 3 | 36 | T:0.194444         | TG:0.472222  |
| TTG:0.333333               |          |   |    |                    |              |
| chr28                      | 11796027 | 2 | 38 | G:0.842105         | GGA:0.157895 |
| chr28                      | 11796042 | 2 | 38 | T:1                | C:0          |
| chr28                      | 11796175 | 2 | 40 | G:1                | A:0          |
| chr28                      | 11796203 | 2 | 38 | C:0.815789         | T:0.184211   |
| chr28                      | 11796322 | 2 | 40 | C:0.75             | G:0.25       |
| chr28                      | 11796550 | 2 | 38 | T:0.631579         | C:0.368421   |
| chr28                      | 11796653 | 2 | 36 | G:1                | T:0          |
| chr28                      | 11796680 | 2 | 38 | A:0.631579         | C:0.368421   |
| chr28                      | 11796783 | 3 | 30 | TA:0.433333        | T:0.233333   |
| TAA:0.333333               |          |   |    |                    |              |
| chr28                      | 11796785 | 2 | 36 | A:1                | T:0          |
| chr28                      | 11796954 | 2 | 38 | T:1                | TATAA:0      |
| chr28                      | 11796955 | 4 | 38 | CTAAA:0.315789     | C:0.394737   |
| ATAAA:0 CTAAATAAA:0.289474 |          |   |    |                    |              |
| chr28                      | 11797048 | 3 | 32 | GAA:0.03125        | G:0.6875 GA: |
| 0.28125                    |          |   |    |                    |              |
| chr28                      | 11797348 | 2 | 34 | C:1                | T:0          |
| chr28                      | 11797612 | 2 | 36 | C:1                | G:0          |
| chr28                      | 11797870 | 2 | 36 | TA:0.944444        | T:0.055556   |
| chr28                      | 11797886 | 2 | 34 | C:0.735294         | CT:0.264706  |
| chr28                      | 11797924 | 2 | 34 | C:0.676471         | G:0.323529   |
| chr28                      | 11797926 | 2 | 34 | C:0.676471         | G:0.323529   |
| chr28                      | 11797930 | 3 | 34 | AAG:0.470588       | A:0.205882   |
| GAG:0.323529               |          |   |    |                    |              |
| chr28                      | 11798052 | 2 | 34 | C:0.617647         | T:0.382353   |
| chr28                      | 11798176 | 2 | 36 | GA:1               | G:0          |
| chr28                      | 11798392 | 2 | 34 | T:0.676471         | C:0.323529   |
| chr28                      | 11798395 | 2 | 34 | C:0.676471         | T:0.323529   |
| chr28                      | 11798517 | 2 | 38 | AAATG:0.605263     | A:0.394737   |
| chr28                      | 11798537 | 2 | 38 | GAATGAATA:0.947368 | G:           |
| 0.0526316                  |          |   |    |                    |              |
| chr28                      | 11798545 | 2 | 38 | A:1                | AATG:0       |
| chr28                      | 11798566 | 2 | 36 | A:0.638889         | C:0.361111   |
| chr28                      | 11798574 | 2 | 36 | A:0.666667         | AAG:0.333333 |
| chr28                      | 11799037 | 2 | 38 | T:0.657895         | C:0.342105   |
| chr28                      | 11799055 | 2 | 36 | T:0.388889         | G:0.611111   |
| chr28                      | 11799202 | 2 | 28 | C:0.857143         | G:0.142857   |
| chr28                      | 11799343 | 2 | 40 | C:0.75             | T:0.25       |
| chr28                      | 11799356 | 2 | 40 | C:0.675            | T:0.325      |

|                |          |                      |    |                      |               |
|----------------|----------|----------------------|----|----------------------|---------------|
| chr28          | 11799383 | 2                    | 34 | C:0.647059           | T:0.352941    |
| chr28          | 11799462 | 2                    | 34 | A:0.0588235          | G:0.941176    |
| chr28          | 11799673 | 2                    | 30 | C:1                  | T:0           |
| chr28          | 11799848 | 2                    | 38 | C:0.394737           | T:0.605263    |
| chr28          | 11799928 | 2                    | 32 | C:0.59375            | CCT:0.40625   |
| chr28          | 11799947 | 2                    | 32 | C:0.78125            | G:0.21875     |
| chr28          | 11800055 | 2                    | 40 | T:0.4                | C:0.6         |
| chr28          | 11800064 | 2                    | 38 | TC:0.421053          | T:0.578947    |
| chr28          | 11800122 | 2                    | 32 | T:0.3125             | C:0.6875      |
| chr28          | 11800129 | 2                    | 32 | T:1                  | G:0           |
| chr28          | 11800151 | 2                    | 36 | C:0.75               | A:0.25        |
| chr28          | 11800187 | 2                    | 36 | T:1                  | C:0           |
| chr28          | 11800210 | 2                    | 34 | G:1                  | A:0           |
| chr28          | 11800343 | 4                    | 40 | CCTCTCTCTCT:0.15     | C:0.275       |
| CCTCT:0.275    |          | CCTCTCT:0.3          |    |                      |               |
| chr28          | 11800516 | 2                    | 30 | T:0.566667           | A:0.433333    |
| chr28          | 11800593 | 2                    | 36 | A:0.0555556          | C:0.944444    |
| chr28          | 11800604 | 2                    | 36 | AG:0.694444          | A:0.305556    |
| chr28          | 11800720 | 2                    | 32 | A:0.84375            | G:0.15625     |
| chr28          | 11800826 | 2                    | 36 | G:0                  | A:1           |
| chr28          | 11800827 | 2                    | 36 | T:0.722222           | C:0.277778    |
| chr28          | 11800915 | 2                    | 38 | T:0.0526316          | G:0.947368    |
| chr28          | 11801101 | 2                    | 40 | T:0.7                | A:0.3         |
| chr28          | 11801371 | 2                    | 38 | G:0.631579           | A:0.368421    |
| chr28          | 11801386 | 2                    | 38 | A:0.605263           | G:0.394737    |
| chr28          | 11801464 | 2                    | 38 | A:1                  | C:0           |
| chr28          | 11801555 | 2                    | 36 | G:1                  | A:0           |
| chr28          | 11801669 | 2                    | 38 | C:0.473684           | T:0.526316    |
| chr28          | 11801788 | 2                    | 38 | G:1                  | A:0           |
| chr28          | 11802005 | 2                    | 40 | G:0.5                | C:0.5         |
| chr28          | 11802011 | 2                    | 40 | G:0.775              | A:0.225       |
| chr28          | 11802016 | 2                    | 40 | T:0.625              | C:0.375       |
| chr28          | 11802098 | 2                    | 38 | C:0.921053           | CT:0.0789474  |
| chr28          | 11802211 | 2                    | 38 | A:0.710526           | T:0.289474    |
| chr28          | 11802315 | 2                    | 38 | GTTTTCTTTCT:0.947368 | G:            |
| 0.0526316      |          |                      |    |                      |               |
| chr28          | 11802650 | 2                    | 38 | A:0.447368           | C:0.552632    |
| chr28          | 11802676 | 2                    | 36 | C:0.75               | T:0.25        |
| chr28          | 11802821 | 2                    | 34 | T:0.617647           | C:0.382353    |
| chr28          | 11803773 | 4                    | 36 | CGT:0.138889         | C:0.277778    |
| CGTGT:0.472222 |          | CGTGTGTGTGT:0.111111 |    |                      |               |
| chr28          | 11804481 | 2                    | 38 | T:0.105263           | C:0.894737    |
| chr28          | 11804513 | 2                    | 38 | C:1                  | T:0           |
| chr28          | 11804562 | 2                    | 36 | C:1                  | T:0           |
| chr28          | 11804597 | 2                    | 34 | G:1                  | A:0           |
| chr28          | 11804796 | 2                    | 38 | G:1                  | A:0           |
| chr28          | 11804985 | 2                    | 40 | G:0.725              | A:0.275       |
| chr28          | 11805043 | 2                    | 40 | C:0.625              | G:0.375       |
| chr28          | 11805140 | 2                    | 36 | AC:0.583333          | A:0.416667    |
| chr28          | 11805141 | 2                    | 36 | C:0.5                | A:0.5         |
| chr28          | 11805286 | 2                    | 38 | A:0.105263           | AGAG:0.894737 |
| chr28          | 11805554 | 2                    | 40 | C:0.45               | T:0.55        |
| chr28          | 11805609 | 2                    | 38 | G:0.605263           | T:0.394737    |
| chr28          | 11805896 | 2                    | 38 | T:0.684211           | C:0.315789    |

|       |          |   |    |                  |             |
|-------|----------|---|----|------------------|-------------|
| chr28 | 11805899 | 2 | 38 | A:0.684211       | G:0.315789  |
| chr28 | 11806045 | 2 | 40 | G:0.65 T:0.35    |             |
| chr28 | 11806146 | 2 | 40 | C:0.1 CT:0.9     |             |
| chr28 | 11806176 | 2 | 38 | CA:0.684211      | C:0.315789  |
| chr28 | 11806298 | 2 | 38 | A:0.105263       | G:0.894737  |
| chr28 | 11806664 | 2 | 36 | A:0.583333       | T:0.416667  |
| chr28 | 11807120 | 2 | 34 | TACC:0.588235    | T:0.411765  |
| chr28 | 11807136 | 3 | 36 | CT:0.305556      | C:0.416667  |
| chr28 | 11807147 | 2 | 36 | A:0.722222       | T:0.277778  |
| chr28 | 11807307 | 2 | 38 | CAA:0.5 C:0.5    |             |
| chr28 | 11807387 | 2 | 38 | G:0.447368       | T:0.552632  |
| chr28 | 11807555 | 2 | 40 | A:0.1 T:0.9      |             |
| chr28 | 11807626 | 2 | 36 | A:0.666667       | G:0.333333  |
| chr28 | 11807707 | 2 | 36 | C:0.972222       | T:0.0277778 |
| chr28 | 11807769 | 2 | 36 | G:0.833333       | A:0.166667  |
| chr28 | 11807828 | 2 | 38 | A:0.631579       | G:0.368421  |
| chr28 | 11808195 | 2 | 38 | T:0.710526       | C:0.289474  |
| chr28 | 11808348 | 2 | 36 | C:0.611111       | T:0.388889  |
| chr28 | 11808481 | 2 | 34 | T:0.676471       | C:0.323529  |
| chr28 | 11808638 | 2 | 34 | C:1 T:0          |             |
| chr28 | 11808712 | 2 | 34 | T:0.764706       | C:0.235294  |
| chr28 | 11809063 | 2 | 40 | T:0.125 C:0.875  |             |
| chr28 | 11809072 | 2 | 40 | T:0.125 C:0.875  |             |
| chr28 | 11809151 | 2 | 38 | C:0.5 T:0.5      |             |
| chr28 | 11809171 | 2 | 38 | G:1 A:0          |             |
| chr28 | 11809177 | 2 | 38 | A:0.105263       | G:0.894737  |
| chr28 | 11809382 | 2 | 38 | A:1 G:0          |             |
| chr28 | 11809535 | 2 | 40 | C:1 T:0          |             |
| chr28 | 11809603 | 2 | 40 | ATTC:0.825       | A:0.175     |
| chr28 | 11809604 | 2 | 40 | TTC:0.775        | T:0.225     |
| chr28 | 11809605 | 2 | 40 | TC:0.975 T:0.025 |             |
| chr28 | 11809606 | 2 | 40 | C:0.8 CT:0.2     |             |
| chr28 | 11809614 | 2 | 40 | T:1 TA:0         |             |
| chr28 | 11809622 | 2 | 40 | T:0.5 C:0.5      |             |
| chr28 | 11809676 | 2 | 34 | G:0.5 A:0.5      |             |
| chr28 | 11809724 | 2 | 34 | C:0.470588       | T:0.529412  |
| chr28 | 11809857 | 2 | 40 | A:0.4 G:0.6      |             |
| chr28 | 11809963 | 2 | 38 | A:0.526316       | G:0.473684  |
| chr28 | 11810177 | 2 | 38 | T:0.657895       | A:0.342105  |
| chr28 | 11810265 | 2 | 40 | G:0.65 A:0.35    |             |
| chr28 | 11810439 | 2 | 40 | G:1 C:0          |             |
| chr28 | 11810719 | 2 | 38 | T:0.447368       | C:0.552632  |
| chr28 | 11810788 | 2 | 38 | T:0.131579       | C:0.868421  |
| chr28 | 11810820 | 2 | 34 | C:0 A:1          |             |
| chr28 | 11810822 | 2 | 34 | T:0 G:1          |             |
| chr28 | 11810869 | 2 | 36 | C:0.444444       | T:0.555556  |
| chr28 | 11810984 | 2 | 40 | C:1 A:0          |             |
| chr28 | 11811150 | 2 | 38 | G:0.710526       | A:0.289474  |
| chr28 | 11811157 | 2 | 38 | G:0.973684       | A:0.0263158 |
| chr28 | 11811263 | 2 | 40 | C:0.475 T:0.525  |             |
| chr28 | 11811376 | 2 | 38 | C:0.736842       | T:0.263158  |
| chr28 | 11811557 | 2 | 40 | T:1 G:0          |             |
| chr28 | 11811873 | 3 | 38 | CTT:0.605263     | C:0.184211  |

CT:0.210526

|                      |          |   |    |              |                   |
|----------------------|----------|---|----|--------------|-------------------|
| chr28                | 11811960 | 2 | 32 | C:0.65625    | T:0.34375         |
| chr28                | 11812022 | 2 | 38 | G:0.631579   | T:0.368421        |
| chr28                | 11812159 | 2 | 36 | G:0.944444   | A:0.0555556       |
| chr28                | 11812218 | 2 | 38 | T:0.105263   | A:0.894737        |
| chr28                | 11812393 | 2 | 40 | G:0.725      | T:0.275           |
| chr28                | 11812447 | 2 | 36 | T:1          | C:0               |
| chr28                | 11812641 | 2 | 40 | G:0.775      | C:0.225           |
| chr28                | 11812831 | 2 | 36 | G:0.111111   | A:0.888889        |
| chr28                | 11812881 | 2 | 38 | A:0.368421   | AAT:0.631579      |
| chr28                | 11813079 | 2 | 34 | G:1          | A:0               |
| chr28                | 11813123 | 2 | 34 | G:1          | A:0               |
| chr28                | 11813221 | 2 | 38 | AC:1         | A:0               |
| chr28                | 11813276 | 2 | 36 | T:0.916667   | TA:0.0833333      |
| chr28                | 11813318 | 2 | 38 | A:0.105263   | G:0.894737        |
| chr28                | 11813397 | 2 | 36 | A:1          | G:0               |
| chr28                | 11813433 | 2 | 36 | C:0.138889   | T:0.861111        |
| chr28                | 11813461 | 2 | 32 | AAC:1        | A:0               |
| chr28                | 11813649 | 2 | 32 | C:1          | T:0               |
| chr28                | 11813676 | 2 | 36 | T:0.111111   | TCGAGGTC:0.888889 |
| chr28                | 11813870 | 2 | 38 | G:1          | GT:0              |
| chr28                | 11813872 | 2 | 38 | G:1          | GT:0              |
| chr28                | 11813873 | 2 | 38 | G:1          | GATA:0            |
| chr28                | 11813877 | 2 | 38 | G:1          | GAAGTGAA:0        |
| chr28                | 11813879 | 2 | 38 | ATTC:1       | A:0               |
| chr28                | 11813883 | 2 | 38 | T:1          | G:0               |
| chr28                | 11813898 | 2 | 38 | GA:0.0263158 | G:0.973684        |
| chr28                | 11813981 | 2 | 34 | G:0.117647   | A:0.882353        |
| chr28                | 11813984 | 2 | 34 | C:1          | T:0               |
| chr28                | 11814013 | 2 | 34 | T:0          | C:1               |
| chr28                | 11814146 | 2 | 38 | G:1          | GA:0              |
| chr28                | 11814337 | 2 | 32 | TCTC:1       | T:0               |
| chr28                | 11814602 | 2 | 40 | C:1          | CA:0              |
| chr28                | 11814736 | 2 | 34 | A:1          | C:0               |
| chr28                | 11815053 | 2 | 40 | A:0.975      | G:0.025           |
| chr28                | 11815772 | 2 | 34 | T:0.147059   | A:0.852941        |
| chr28                | 11815788 | 2 | 36 | G:0.0277778  | A:0.972222        |
| chr28                | 11816506 | 3 | 38 | A:0.631579   | AAC:0.0526316     |
| AACACACACAC:0.315789 |          |   |    |              |                   |
| chr28                | 11816632 | 2 | 34 | T:0.470588   | C:0.529412        |
| chr28                | 11816655 | 2 | 34 | C:0.470588   | T:0.529412        |
| chr28                | 11816786 | 2 | 30 | T:0.6        | C:0.4             |
| chr28                | 11816941 | 2 | 38 | C:1          | T:0               |
| chr28                | 11816942 | 2 | 38 | A:0.552632   | G:0.447368        |
| chr28                | 11816992 | 2 | 38 | G:0.552632   | C:0.447368        |
| chr28                | 11816998 | 2 | 38 | C:0.552632   | T:0.447368        |
| chr28                | 11817018 | 2 | 38 | A:0.552632   | G:0.447368        |
| chr28                | 11817080 | 2 | 34 | C:0.588235   | T:0.411765        |
| chr28                | 11817154 | 2 | 36 | A:0.583333   | G:0.416667        |
| chr28                | 11817388 | 2 | 36 | A:0.611111   | G:0.388889        |
| chr28                | 11817437 | 2 | 36 | T:0.527778   | A:0.472222        |
| chr28                | 11817467 | 2 | 36 | T:0.527778   | C:0.472222        |
| chr28                | 11817485 | 2 | 36 | C:0.527778   | T:0.472222        |
| chr28                | 11817814 | 2 | 34 | C:0.5        | T:0.5             |

|                                            |          |   |    |                        |                |
|--------------------------------------------|----------|---|----|------------------------|----------------|
| chr28                                      | 11817846 | 2 | 38 | CTAATT:0.973684        | C:0.0263158    |
| chr28                                      | 11818123 | 2 | 38 | C:0.578947             | T:0.421053     |
| chr28                                      | 11818310 | 2 | 32 | A:1                    | G:0            |
| chr28                                      | 11818731 | 2 | 40 | C:0.4                  | T:0.6          |
| chr28                                      | 11819259 | 2 | 38 | T:0.631579             | C:0.368421     |
| chr28                                      | 11819408 | 2 | 38 | A:0.552632             | G:0.447368     |
| chr28                                      | 11819651 | 2 | 36 | G:0.444444             | A:0.555556     |
| chr28                                      | 11819773 | 2 | 38 | G:0.552632             | C:0.447368     |
| chr28                                      | 11819835 | 3 | 32 | CAA:0.0625             | C:0.71875      |
| CA:0.21875                                 |          |   |    |                        |                |
| chr28                                      | 11819852 | 2 | 30 | A:0.366667             | G:0.633333     |
| chr28                                      | 11819948 | 2 | 38 | A:0.552632             | G:0.447368     |
| chr28                                      | 11819970 | 2 | 40 |                        |                |
| GTAACTTAAGTTAAGTTAACTTAAGGCTTAAGTTAAGTTA:0 |          |   |    | G:1                    |                |
| chr28                                      | 11820100 | 2 | 36 | T:0.888889             | C:0.111111     |
| chr28                                      | 11820249 | 2 | 40 | C:0.975                | T:0.025        |
| chr28                                      | 11820285 | 3 | 38 | GATAAATAAATAA:0.394737 | G:             |
| 0.105263 GATAAATAA:0.5                     |          |   |    |                        |                |
| chr28                                      | 11820434 | 2 | 36 | T:0.583333             | C:0.416667     |
| chr28                                      | 11820503 | 2 | 34 | C:1                    | T:0            |
| chr28                                      | 11821191 | 2 | 38 | G:0.921053             | GA:0.0789474   |
| chr28                                      | 11821468 | 2 | 36 | T:0.972222             | TG:0.0277778   |
| chr28                                      | 11822074 | 2 | 38 | A:0.473684             | T:0.526316     |
| chr28                                      | 11822106 | 2 | 38 | C:0.578947             | T:0.421053     |
| chr28                                      | 11822620 | 2 | 38 | G:0.815789             | T:0.184211     |
| chr28                                      | 11823401 | 2 | 34 | C:0.970588             | T:0.0294118    |
| chr28                                      | 11823549 | 2 | 38 | T:0.526316             | C:0.473684     |
| chr28                                      | 11823682 | 2 | 36 | G:0.0277778            | A:0.972222     |
| chr28                                      | 11823745 | 2 | 36 | A:0.472222             | G:0.527778     |
| chr28                                      | 11824349 | 2 | 38 | G:0.921053             | C:0.0789474    |
| chr28                                      | 11824401 | 2 | 40 | G:0                    | A:1            |
| chr28                                      | 11824639 | 2 | 36 | T:0.916667             | G:0.0833333    |
| chr28                                      | 11824717 | 2 | 40 | G:0.55                 | T:0.45         |
| chr28                                      | 11825067 | 2 | 38 | G:0.868421             | GC:0.131579    |
| chr28                                      | 11825091 | 2 | 38 | G:0.894737             | A:0.105263     |
| chr28                                      | 11825265 | 2 | 40 | G:0.55                 | A:0.45         |
| chr28                                      | 11825271 | 2 | 40 | T:0.85                 | C:0.15         |
| chr28                                      | 11825284 | 2 | 40 | C:0.55                 | A:0.45         |
| chr28                                      | 11825581 | 2 | 38 | A:0.578947             | G:0.421053     |
| chr28                                      | 11825663 | 2 | 34 | C:0.382353             | A:0.617647     |
| chr28                                      | 11825667 | 2 | 34 | A:0.441176             | T:0.558824     |
| chr28                                      | 11825919 | 2 | 38 | T:0.973684             | C:0.0263158    |
| chr28                                      | 11826023 | 2 | 38 | G:0.0263158            | A:0.973684     |
| chr28                                      | 11826264 | 2 | 36 | C:0.416667             | CA:0.583333    |
| chr28                                      | 11826297 | 2 | 36 | C:0.888889             | T:0.111111     |
| chr28                                      | 11826375 | 2 | 40 | C:0.325                | A:0.675        |
| chr28                                      | 11826420 | 2 | 36 | C:0.0277778            | T:0.972222     |
| chr28                                      | 11826445 | 2 | 36 | G:0.472222             | C:0.527778     |
| chr28                                      | 11826491 | 2 | 36 | G:0.5                  | A:0.5          |
| chr28                                      | 11826844 | 2 | 38 | A:0.578947             | G:0.421053     |
| chr28                                      | 11826905 | 2 | 38 | C:0.736842             | CTAAT:0.263158 |
| chr28                                      | 11826973 | 2 | 38 | T:0.5                  | C:0.5          |
| chr28                                      | 11827081 | 2 | 38 | CAATAA:0.894737        | C:0.105263     |
| chr28                                      | 11827150 | 2 | 36 | A:1                    | G:0            |

|       |          |   |    |                |              |             |
|-------|----------|---|----|----------------|--------------|-------------|
| chr28 | 11827449 | 2 | 40 | T:1            | C:0          |             |
| chr28 | 11827559 | 2 | 36 | C:0.527778     |              | T:0.472222  |
| chr28 | 11827649 | 2 | 36 | G:0.888889     |              | A:0.111111  |
| chr28 | 11827729 | 2 | 40 | A:0.9          | G:0.1        |             |
| chr28 | 11827775 | 2 | 40 | C:0.5          | T:0.5        |             |
| chr28 | 11827790 | 2 | 40 | G:0.85         | GAT:0.15     |             |
| chr28 | 11827919 | 2 | 40 | A:0.05         | T:0.95       |             |
| chr28 | 11827970 | 2 | 40 | T:0.875        | A:0.125      |             |
| chr28 | 11827995 | 2 | 40 | A:0.6          | ATTATATG:0.4 |             |
| chr28 | 11828110 | 2 | 36 | C:0.972222     |              | A:0.0277778 |
| chr28 | 11828111 | 2 | 36 | G:1            | A:0          |             |
| chr28 | 11828210 | 2 | 38 | G:0.789474     |              | A:0.210526  |
| chr28 | 11828230 | 2 | 40 | T:0.9          | TA:0.1       |             |
| chr28 | 11828240 | 2 | 40 | T:0.925        | A:0.075      |             |
| chr28 | 11828364 | 2 | 38 | G:0.631579     |              | A:0.368421  |
| chr28 | 11828419 | 2 | 40 | C:0.575        | T:0.425      |             |
| chr28 | 11828430 | 2 | 40 | G:0.575        | GT:0.425     |             |
| chr28 | 11828459 | 2 | 40 | C:0.525        | T:0.475      |             |
| chr28 | 11828495 | 2 | 38 | C:0.0526316    |              | T:0.947368  |
| chr28 | 11828545 | 2 | 40 | C:0.65         | T:0.35       |             |
| chr28 | 11828579 | 2 | 36 | T:0.611111     |              | C:0.388889  |
| chr28 | 11828585 | 2 | 36 | GA:0.638889    |              | G:0.361111  |
| chr28 | 11828601 | 2 | 40 | T:0.975        | C:0.025      |             |
| chr28 | 11828692 | 2 | 36 | G:0.611111     |              | T:0.388889  |
| chr28 | 11828724 | 2 | 28 | A:0.0357143    |              | G:0.964286  |
| chr28 | 11828765 | 2 | 28 | G:0.535714     |              | A:0.464286  |
| chr28 | 11828766 | 2 | 28 | A:0.178571     |              | G:0.821429  |
| chr28 | 11830489 | 2 | 14 | C:0.357143     |              | T:0.642857  |
| chr28 | 11830516 | 2 | 16 | ATT:0.3125     |              | A:0.6875    |
| chr28 | 11830520 | 2 | 16 | T:0.3125       | TAAA:0.6875  |             |
| chr28 | 11830549 | 2 | 26 | TA:0.153846    |              | T:0.846154  |
| chr28 | 11830623 | 2 | 38 | G:0.947368     |              | A:0.0526316 |
| chr28 | 11830972 | 2 | 36 | TTC:0.5        | T:0.5        |             |
| chr28 | 11830989 | 2 | 38 | TC:0.552632    |              | T:0.447368  |
| chr28 | 11831002 | 2 | 36 | C:0.5          | T:0.5        |             |
| chr28 | 11831044 | 2 | 38 | A:1            | G:0          |             |
| chr28 | 11831052 | 2 | 38 | CT:1           | C:0          |             |
| chr28 | 11831054 | 2 | 34 | TA:0.529412    |              | T:0.470588  |
| chr28 | 11831158 | 2 | 38 | A:0            | AG:1         |             |
| chr28 | 11831197 | 2 | 32 | G:0.5625       | A:0.4375     |             |
| chr28 | 11831230 | 2 | 36 | ACT:0.5        | A:0.5        |             |
| chr28 | 11831478 | 2 | 38 | A:0.526316     |              | G:0.473684  |
| chr28 | 11831512 | 2 | 40 | AT:0.025       | A:0.975      |             |
| chr28 | 11831519 | 2 | 40 | C:0.575        | T:0.425      |             |
| chr28 | 11831520 | 2 | 40 | C:0.55         | G:0.45       |             |
| chr28 | 11831564 | 2 | 40 | A:0.625        | T:0.375      |             |
| chr28 | 11831602 | 2 | 36 | T:0.972222     |              | A:0.0277778 |
| chr28 | 11831672 | 2 | 38 | A:0.552632     |              | G:0.447368  |
| chr28 | 11831673 | 2 | 38 | C:0.657895     |              | T:0.342105  |
| chr28 | 11831689 | 2 | 38 | ATACC:0.552632 |              | A:0.447368  |
| chr28 | 11831695 | 2 | 38 | GGAA:0.552632  |              | G:0.447368  |
| chr28 | 11831743 | 2 | 38 | A:0.105263     |              | C:0.894737  |
| chr28 | 11831811 | 2 | 40 | T:0.575        | C:0.425      |             |
| chr28 | 11831902 | 2 | 40 | C:0.575        | T:0.425      |             |

|                                    |          |                           |    |                 |                       |               |
|------------------------------------|----------|---------------------------|----|-----------------|-----------------------|---------------|
| chr28                              | 11831994 | 2                         | 38 | G:1             | T:0                   |               |
| chr28                              | 11832056 | 2                         | 38 | G:0.973684      |                       | A:0.0263158   |
| chr28                              | 11832120 | 2                         | 38 | G:0.552632      |                       | A:0.447368    |
| chr28                              | 11832161 | 2                         | 40 | C:0.625         | T:0.375               |               |
| chr28                              | 11832260 | 2                         | 40 | G:0.6           | A:0.4                 |               |
| chr28                              | 11832317 | 2                         | 38 | G:0.657895      |                       | GA:0.342105   |
| chr28                              | 11832396 | 2                         | 34 | A:1             | G:0                   |               |
| chr28                              | 11832428 | 2                         | 34 | A:0.588235      |                       | G:0.411765    |
| chr28                              | 11832479 | 2                         | 36 | C:0.555556      |                       | A:0.444444    |
| chr28                              | 11832562 | 2                         | 38 | G:0.605263      |                       | A:0.394737    |
| chr28                              | 11832586 | 2                         | 40 | T:0.625         | C:0.375               |               |
| chr28                              | 11832644 | 2                         | 36 | T:0.611111      |                       | C:0.388889    |
| chr28                              | 11832742 | 5                         | 38 | ATTT:0.0789474  |                       | A:0.0526316   |
| AT:0.447368                        |          | ATT:0                     |    | ATTTT:0.421053  |                       |               |
| chr28                              | 11832909 | 2                         | 40 | A:0.525         | G:0.475               |               |
| chr28                              | 11832947 | 2                         | 38 | T:1             | TA:0                  |               |
| chr28                              | 11832948 | 2                         | 38 | A:1             | T:0                   |               |
| chr28                              | 11832949 | 2                         | 38 | G:0.473684      |                       | A:0.526316    |
| chr28                              | 11833158 | 2                         | 40 | T:0.975         |                       |               |
| TTAAAACGTTTAAAAAAAATAAAAAAAA:0.025 |          |                           |    |                 |                       |               |
| chr28                              | 11833277 | 2                         | 36 | C:0.666667      |                       | T:0.333333    |
| chr28                              | 11833284 | 2                         | 34 | T:1             | C:0                   |               |
| chr28                              | 11833337 | 2                         | 34 | G:0.617647      |                       | A:0.382353    |
| chr28                              | 11833421 | 2                         | 32 | G:0.875         | T:0.125               |               |
| chr28                              | 11833456 | 2                         | 34 | CA:0            | C:1                   |               |
| chr28                              | 11833459 | 2                         | 34 | C:0             | G:1                   |               |
| chr28                              | 11833491 | 2                         | 36 | G:0.0555556     |                       | GAA:0.944444  |
| chr28                              | 11833492 | 2                         | 36 | T:0.0555556     |                       | TTAG:0.944444 |
| chr28                              | 11833560 | 2                         | 40 | ATGTGAATCT:0.95 |                       | A:0.05        |
| chr28                              | 11833746 | 2                         | 34 | C:0.617647      |                       | T:0.382353    |
| chr28                              | 11833798 | 2                         | 38 | T:1             | C:0                   |               |
| chr28                              | 11833836 | 2                         | 36 | T:1             | C:0                   |               |
| chr28                              | 11834109 | 2                         | 36 | C:0.833333      |                       | T:0.166667    |
| chr28                              | 11834218 | 2                         | 40 | C:0.625         | CCAAA:0.375           |               |
| chr28                              | 11834221 | 2                         | 40 | C:0.625         | T:0.375               |               |
| chr28                              | 11834404 | 2                         | 34 | A:0.588235      |                       | G:0.411765    |
| chr28                              | 11834520 | 2                         | 36 | G:0.0555556     |                       | A:0.944444    |
| chr28                              | 11834541 | 2                         | 38 | G:0.0789474     |                       | GT:0.921053   |
| chr28                              | 11834686 | 2                         | 38 | G:0.526316      |                       | A:0.473684    |
| chr28                              | 11834708 | 2                         | 38 | G:0.973684      |                       | A:0.0263158   |
| chr28                              | 11834721 | 2                         | 36 | C:0.0555556     |                       | T:0.944444    |
| chr28                              | 11834734 | 2                         | 36 | C:0.0555556     |                       | T:0.944444    |
| chr28                              | 11834783 | 2                         | 32 | G:0.53125       |                       | A:0.46875     |
| chr28                              | 11834854 | 2                         | 38 | A:1             | G:0                   |               |
| chr28                              | 11835063 | 2                         | 40 | G:0.025         | A:0.975               |               |
| chr28                              | 11835117 | 2                         | 38 | C:0.868421      |                       | CA:0.131579   |
| chr28                              | 11835326 | 2                         | 38 | G:0.0263158     |                       | A:0.973684    |
| chr28                              | 11835337 | 3                         | 40 | T:0.575         | TAAAAATGGGAAGGTAAAAA: |               |
| 0.275                              |          | TAAAAATGGGAAGGTAAAAA:0.15 |    |                 |                       |               |
| chr28                              | 11835457 | 2                         | 38 | G:0.868421      |                       | T:0.131579    |
| chr28                              | 11835484 | 2                         | 36 | T:0             | A:1                   |               |
| chr28                              | 11835514 | 2                         | 36 | C:0.805556      |                       | CA:0.194444   |
| chr28                              | 11835610 | 2                         | 40 | T:0.025         | C:0.975               |               |
| chr28                              | 11835757 | 2                         | 34 | C:1             | T:0                   |               |

|       |          |   |    |              |                             |
|-------|----------|---|----|--------------|-----------------------------|
| chr28 | 11835894 | 2 | 38 | C:0.0789474  | T:0.921053                  |
| chr28 | 11835919 | 2 | 38 | A:0.0789474  | G:0.921053                  |
| chr28 | 11835996 | 2 | 40 | T:0.45       | A:0.55                      |
| chr28 | 11836065 | 2 | 40 | T:0.975      | C:0.025                     |
| chr28 | 11836313 | 2 | 38 | A:1          | ATGAGAAAATATTTTTTTTTTTTTT:0 |
| chr28 | 11836403 | 2 | 36 | C:0.972222   | T:0.0277778                 |
| chr28 | 11836409 | 2 | 36 | A:0.527778   | G:0.472222                  |
| chr28 | 11836574 | 2 | 40 | T:0.95       | G:0.05                      |
| chr28 | 11836609 | 2 | 38 | C:0.578947   | A:0.421053                  |
| chr28 | 11836733 | 2 | 38 | C:0.0789474  | T:0.921053                  |
| chr28 | 11836800 | 2 | 40 | T:0.125      | C:0.875                     |
| chr28 | 11836862 | 2 | 40 | G:0.125      | A:0.875                     |
| chr28 | 11837006 | 2 | 40 | A:0.1        | C:0.9                       |
| chr28 | 11837042 | 2 | 38 | A:0.605263   | T:0.394737                  |
| chr28 | 11837067 | 2 | 38 | C:0.605263   | G:0.394737                  |
| chr28 | 11837127 | 2 | 40 | A:0.125      | C:0.875                     |
| chr28 | 11837136 | 2 | 38 | C:0.947368   | A:0.0526316                 |
| chr28 | 11837245 | 2 | 40 | T:1          | C:0                         |
| chr28 | 11837546 | 2 | 38 | T:0.578947   | C:0.421053                  |
| chr28 | 11837672 | 2 | 36 | G:0.583333   | T:0.416667                  |
| chr28 | 11837742 | 2 | 36 | A:0.611111   | G:0.388889                  |
| chr28 | 11837794 | 2 | 34 | T:0.647059   | A:0.352941                  |
| chr28 | 11837849 | 2 | 38 | A:0.105263   | G:0.894737                  |
| chr28 | 11837878 | 2 | 36 | T:1          | TA:0                        |
| chr28 | 11837879 | 2 | 36 | T:0.472222   | A:0.527778                  |
| chr28 | 11838120 | 2 | 36 | G:0.583333   | A:0.416667                  |
| chr28 | 11838205 | 2 | 40 | TAATG:0.6    | T:0.4                       |
| chr28 | 11838398 | 2 | 40 | T:0.6        | A:0.4                       |
| chr28 | 11838570 | 2 | 36 | A:0.0555556  | G:0.944444                  |
| chr28 | 11838777 | 2 | 38 | G:0.105263   | A:0.894737                  |
| chr28 | 11838809 | 2 | 36 | ATC:0.972222 | A:0.0277778                 |
| chr28 | 11838940 | 2 | 36 | A:0.111111   | G:0.888889                  |
| chr28 | 11839043 | 2 | 38 | G:0.0789474  | T:0.921053                  |
| chr28 | 11839070 | 2 | 34 | A:0.117647   | G:0.882353                  |
| chr28 | 11839158 | 2 | 34 | C:0.117647   | T:0.882353                  |
| chr28 | 11839209 | 2 | 40 | T:0.1        | TAAGA:0.9                   |
| chr28 | 11839356 | 2 | 36 | G:0.111111   | GA:0.888889                 |
| chr28 | 11839467 | 2 | 40 | G:0.1        | C:0.9                       |
| chr28 | 11840040 | 2 | 36 | T:0.555556   | C:0.444444                  |
| chr28 | 11840100 | 2 | 38 | C:1          | A:0                         |
| chr28 | 11840264 | 2 | 38 | G:0.526316   | A:0.473684                  |
| chr28 | 11840358 | 2 | 36 | T:0.166667   | G:0.833333                  |
| chr28 | 11840359 | 2 | 36 | A:0.166667   | G:0.833333                  |
| chr28 | 11840463 | 2 | 40 | G:0.8        | C:0.2                       |
| chr28 | 11841017 | 2 | 38 | AG:0.605263  | A:0.394737                  |
| chr28 | 11841310 | 2 | 38 | T:0.0263158  | C:0.973684                  |
| chr28 | 11841644 | 2 | 36 | C:0.916667   | T:0.0833333                 |
| chr28 | 11841865 | 2 | 36 | T:0.611111   | C:0.388889                  |
| chr28 | 11841892 | 2 | 40 | A:0.9        | G:0.1                       |
| chr28 | 11841941 | 2 | 40 | G:1          | A:0                         |
| chr28 | 11841996 | 2 | 40 | C:0.025      | T:0.975                     |
| chr28 | 11842065 | 2 | 36 | T:0.0277778  | TTATATC:0.972222            |
| chr28 | 11842081 | 2 | 34 | A:1          | G:0                         |
| chr28 | 11842281 | 2 | 38 | TA:0.368421  | T:0.631579                  |



|       |                |    |                              |          |                |
|-------|----------------|----|------------------------------|----------|----------------|
| chr28 | 11842318 2     | 40 | C:0.025                      | A:0.975  |                |
| chr28 | 11842384 2     | 36 | T:1                          | G:0      |                |
| chr28 | 11842436 2     | 40 | A:0                          | G:1      |                |
| chr28 | 11842615 2     | 40 | T:0.025                      | C:0.975  |                |
| chr28 | 11842801 2     | 38 | C:0.552632                   |          | A:0.447368     |
| chr28 | 11842817 2     | 38 | G:1                          | A:0      |                |
| chr28 | 11842837 2     | 38 | A:1                          | G:0      |                |
| chr28 | 11842919 2     | 40 | A:0.025                      | C:0.975  |                |
| chr28 | 11842933 2     | 40 | T:1                          | A:0      |                |
| chr28 | 11843043 2     | 38 | A:0.473684                   |          | G:0.526316     |
| chr28 | 11843103 2     | 38 | G:0                          | GA:1     |                |
| chr28 | 11843108 2     | 38 | AT:0                         | A:1      |                |
| chr28 | 11843111 2     | 38 | G:0                          | A:1      |                |
| chr28 | 11843114 2     | 38 | AC:0                         | A:1      |                |
| chr28 | 11843120 2     | 38 | G:0                          | A:1      |                |
| chr28 | 11843121 2     | 38 | A:0                          | G:1      |                |
| chr28 | 11843135 2     | 38 | G:0                          | T:1      |                |
| chr28 | 11843136 2     | 38 | A:0                          | G:1      |                |
| chr28 | 11843151 2     | 38 | C:0                          | A:1      |                |
| chr28 | 11843152 2     | 38 | G:0                          | C:1      |                |
| chr28 | 11843216 2     | 36 | GC:0                         | G:1      |                |
| chr28 | 11843431 3     | 34 | G:0.794118                   |          | GA:0 GAA:      |
|       | 0.205882       |    |                              |          |                |
| chr28 | 11843435 2     | 34 | A:0.676471                   |          | G:0.323529     |
| chr28 | 11843497 2     | 40 | C:0.525                      | T:0.475  |                |
| chr28 | 11843521 2     | 40 | A:0.75                       | G:0.25   |                |
| chr28 | 11843596 2     | 40 | C:0.7                        | T:0.3    |                |
| chr28 | 11843803 2     | 32 | T:0.6875                     | C:0.3125 |                |
| chr28 | 11843819 4     | 34 | CCTCTCTCTCTCTCTCTCT:0.117647 |          |                |
|       | C:0.0882353    |    | CCTCTCTCT:0.411765           |          |                |
|       | CCTCT:0.382353 |    |                              |          |                |
| chr28 | 11843936 2     | 36 | G:1                          | A:0      |                |
| chr28 | 11844118 2     | 4  | C:0                          | T:1      |                |
| chr28 | 11844333 2     | 36 | C:0.0277778                  |          | A:0.972222     |
| chr28 | 11844361 2     | 32 | AT:0.71875                   |          | A:0.28125      |
| chr28 | 11844447 2     | 36 | T:0.75                       | G:0.25   |                |
| chr28 | 11844576 2     | 38 | C:0.894737                   |          | CAAAA:0.105263 |
| chr28 | 11845066 2     | 30 | C:0.433333                   |          | T:0.566667     |
| chr28 | 11845187 2     | 22 | CA:0.454545                  |          | C:0.545455     |
| chr28 | 11845202 2     | 22 | C:0.454545                   |          | A:0.545455     |
| chr28 | 11845333 2     | 36 | A:1                          | G:0      |                |
| chr28 | 11845820 2     | 8  | T:1                          | A:0      |                |
| chr28 | 11845839 2     | 8  | A:0                          | G:1      |                |
| chr28 | 11845849 2     | 14 | T:1                          | G:0      |                |
| chr28 | 11845940 2     | 38 | C:0.447368                   |          | T:0.552632     |
| chr28 | 11846050 2     | 14 | A:0                          | G:1      |                |
| chr28 | 11846163 2     | 34 | T:0.794118                   |          | G:0.205882     |
| chr28 | 11846225 2     | 36 | G:0.583333                   |          | A:0.416667     |
| chr28 | 11846457 2     | 36 | T:0.0555556                  |          | G:0.944444     |
| chr28 | 11846915 2     | 30 | GT:1                         | G:0      |                |
| chr28 | 11846968 2     | 38 | G:0.421053                   |          | A:0.578947     |
| chr28 | 11847408 2     | 38 | G:0                          | A:1      |                |
| chr28 | 11847412 2     | 38 | C:0.552632                   |          | T:0.447368     |
| chr28 | 11847489 2     | 34 | A:0.529412                   |          | G:0.470588     |
| chr28 | 11847696 2     | 38 | G:0.473684                   |          | A:0.526316     |

|       |          |   |    |                 |             |     |
|-------|----------|---|----|-----------------|-------------|-----|
| chr28 | 11847823 | 2 | 34 | T:0.558824      | G:0.441176  |     |
| chr28 | 11848129 | 2 | 34 | T:0.735294      | C:0.264706  |     |
| chr28 | 11848274 | 2 | 40 | A:1             | G:0         |     |
| chr28 | 11848503 | 2 | 38 | TTTTTC:0.578947 | T:0.421053  |     |
| chr28 | 11848581 | 2 | 34 | A:1             | C:0         |     |
| chr28 | 11849481 | 2 | 38 | C:0.789474      | T:0.210526  |     |
| chr28 | 11849660 | 2 | 38 | A:0.921053      | T:0.0789474 |     |
| chr28 | 11849668 | 2 | 40 | A:0.75          | G:0.25      |     |
| chr28 | 11849831 | 2 | 30 | A:0.466667      | G:0.533333  |     |
| chr28 | 11850180 | 2 | 36 | T:0.166667      | TA:0.833333 |     |
| chr28 | 11850231 | 2 | 40 | T:0.025         | G:0.975     |     |
| chr28 | 11850436 | 2 | 36 | T:1             | TA:0        |     |
| chr28 | 11850510 | 2 | 38 | C:0.815789      | G:0.184211  |     |
| chr28 | 11850866 | 2 | 38 | G:0.921053      | T:0.0789474 |     |
| chr28 | 11851134 | 2 | 38 | G:1             | A:0         |     |
| chr28 | 11851149 | 2 | 34 | CT:0.470588     | C:0.529412  |     |
| chr28 | 11851158 | 2 | 34 | T:0.764706      | A:0.235294  |     |
| chr28 | 11851160 | 2 | 34 | A:0.558824      | AT:0.441176 |     |
| chr28 | 11851192 | 2 | 32 | A:0.65625       | AAG:0.34375 |     |
| chr28 | 11851261 | 2 | 30 | C:1             | T:0         |     |
| chr28 | 11851340 | 2 | 40 | C:0.875         | T:0.125     |     |
| chr28 | 11851374 | 2 | 38 | CA:0.973684     | C:0.0263158 |     |
| chr28 | 11851486 | 2 | 34 | G:0.970588      | A:0.0294118 |     |
| chr28 | 11851525 | 2 | 34 | T:0             | C:1         |     |
| chr28 | 11851613 | 2 | 40 | C:1             | T:0         |     |
| chr28 | 11851725 | 2 | 34 | T:0.676471      | C:0.323529  |     |
| chr28 | 11851797 | 2 | 38 | T:0.921053      | G:0.0789474 |     |
| chr28 | 11852005 | 2 | 36 | A:0.805556      | T:0.194444  |     |
| chr28 | 11852018 | 2 | 36 | A:0.333333      | G:0.666667  |     |
| chr28 | 11852216 | 2 | 36 | C:0.888889      | T:0.111111  |     |
| chr28 | 11852271 | 2 | 34 | C:0.558824      | A:0.441176  |     |
| chr28 | 11852326 | 2 | 36 | A:0.0277778     | G:0.972222  |     |
| chr28 | 11852709 | 2 | 40 | T:0.3           | C:0.7       |     |
| chr28 | 11852752 | 2 | 40 | A:0.875         | G:0.125     |     |
| chr28 | 11852785 | 2 | 40 | T:0.275         | A:0.725     |     |
| chr28 | 11853025 | 3 | 38 | CAA:0           | C:0.263158  | CA: |
|       | 0.736842 |   |    |                 |             |     |
| chr28 | 11853136 | 2 | 34 | C:0.735294      | T:0.264706  |     |
| chr28 | 11853296 | 2 | 36 | C:0.416667      | A:0.583333  |     |
| chr28 | 11853440 | 2 | 40 | T:0.025         | C:0.975     |     |
| chr28 | 11853526 | 2 | 40 | A:0.975         | G:0.025     |     |
| chr28 | 11853567 | 2 | 40 | G:1             | A:0         |     |
| chr28 | 11853933 | 2 | 38 | A:0.552632      | G:0.447368  |     |
| chr28 | 11854146 | 2 | 34 | T:0.617647      | G:0.382353  |     |
| chr28 | 11854209 | 2 | 38 | G:0.5           | A:0.5       |     |
| chr28 | 11854354 | 2 | 36 | A:0.555556      | G:0.444444  |     |
| chr28 | 11854391 | 2 | 36 | G:0.944444      | C:0.0555556 |     |
| chr28 | 11854476 | 2 | 32 | TA:0.4375       | T:0.5625    |     |
| chr28 | 11854506 | 2 | 36 | C:0.5           | T:0.5       |     |
| chr28 | 11854642 | 2 | 36 | A:0.0555556     | T:0.944444  |     |
| chr28 | 11854673 | 2 | 32 | T:0.5625        | A:0.4375    |     |
| chr28 | 11854676 | 2 | 30 | A:0.5           | T:0.5       |     |
| chr28 | 11854708 | 2 | 34 | C:0.941176      | A:0.0588235 |     |
| chr28 | 11855104 | 2 | 38 | C:0.710526      | T:0.289474  |     |

|       |                      |   |    |                                |                   |
|-------|----------------------|---|----|--------------------------------|-------------------|
| chr28 | 11855240             | 2 | 40 | TA:0.525                       | T:0.475           |
| chr28 | 11855243             | 2 | 40 | CTCTATTTGTATATTTTGACAATCTATTT: |                   |
|       | 0.525                |   |    | C:0.475                        |                   |
| chr28 | 11855485             | 2 | 38 | TAA:0.815789                   | T:0.184211        |
| chr28 | 11855489             | 2 | 38 | AAAAAATAAAATAAAAT:0.868421     |                   |
|       | A:0.131579           |   |    |                                |                   |
| chr28 | 11855491             | 2 | 40 | A:0.425                        | AT:0.575          |
| chr28 | 11855492             | 2 | 40 | AAAT:0.975                     | A:0.025           |
| chr28 | 11855495             | 3 | 40 | TAAAATAAAATAAAA:0.25           | T:0.175           |
|       | TAAATAAAATAAAA:0.575 |   |    |                                |                   |
| chr28 | 11855500             | 3 | 40 | TA:0.7                         | TAAA:0.025        |
| chr28 | 11855501             | 2 | 40 | A:0.775                        | AAAT:0.225        |
| chr28 | 11855509             | 2 | 40 | A:0.425                        | T:0.575           |
| chr28 | 11855989             | 2 | 34 | A:1                            | G:0               |
| chr28 | 11856291             | 2 | 36 | G:0.611111                     | A:0.388889        |
| chr28 | 11856359             | 2 | 36 | C:0.444444                     | A:0.555556        |
| chr28 | 11856589             | 2 | 36 | T:1                            | C:0               |
| chr28 | 11856689             | 2 | 38 | G:0.473684                     | A:0.526316        |
| chr28 | 11856771             | 2 | 36 | A:0.555556                     | C:0.444444        |
| chr28 | 11856801             | 2 | 36 | C:1                            | T:0               |
| chr28 | 11856828             | 2 | 36 | C:1                            | T:0               |
| chr28 | 11856850             | 2 | 36 | G:0.972222                     | T:0.027778        |
| chr28 | 11856984             | 2 | 38 | C:0.710526                     | T:0.289474        |
| chr28 | 11857174             | 2 | 30 | GA:0.0333333                   | G:0.966667        |
| chr28 | 11857197             | 2 | 32 | G:1                            | A:0               |
| chr28 | 11857306             | 2 | 38 | T:0                            | A:1               |
| chr28 | 11857441             | 2 | 40 | C:0.05                         | T:0.95            |
| chr28 | 11857656             | 2 | 38 | G:0.736842                     | A:0.263158        |
| chr28 | 11857712             | 2 | 40 | G:0.55                         | A:0.45            |
| chr28 | 11857887             | 2 | 38 | G:0.736842                     | T:0.263158        |
| chr28 | 11857896             | 2 | 38 | C:0.710526                     | T:0.289474        |
| chr28 | 11858000             | 2 | 38 | A:0.0526316                    | C:0.947368        |
| chr28 | 11858084             | 2 | 38 | A:0.710526                     | G:0.289474        |
| chr28 | 11858194             | 2 | 38 | G:0.710526                     | T:0.289474        |
| chr28 | 11858610             | 2 | 40 | T:0.3                          | C:0.7             |
| chr28 | 11858912             | 2 | 40 | C:1                            | T:0               |
| chr28 | 11859084             | 2 | 38 | C:1                            | A:0               |
| chr28 | 11859194             | 2 | 36 | C:0.805556                     | T:0.194444        |
| chr28 | 11859376             | 2 | 40 | C:0.7                          | T:0.3             |
| chr28 | 11859705             | 2 | 40 | ATTT:0.325                     | A:0.675           |
| chr28 | 11859712             | 2 | 40 | C:0.95                         | T:0.05            |
| chr28 | 11859833             | 2 | 36 | T:0.25                         | TA:0.75           |
| chr28 | 11859960             | 2 | 32 | A:0.6875                       | T:0.3125          |
| chr28 | 11860041             | 2 | 38 | T:0.447368                     | C:0.552632        |
| chr28 | 11860201             | 2 | 36 | CAT:0.833333                   | C:0.166667        |
| chr28 | 11860909             | 2 | 34 | C:0.470588                     | A:0.529412        |
| chr28 | 11861144             | 2 | 38 | G:0.763158                     | GTAAAA:0.236842   |
| chr28 | 11861147             | 2 | 38 | G:0.763158                     | GA:0.236842       |
| chr28 | 11861148             | 2 | 38 | T:0.763158                     | TAATCTTTTATCTAGG: |
|       | 0.236842             |   |    |                                |                   |
| chr28 | 11861292             | 2 | 34 | T:1                            | C:0               |
| chr28 | 11861299             | 2 | 34 | C:1                            | CT:0              |
| chr28 | 11861520             | 2 | 38 | C:0.789474                     | G:0.210526        |
| chr28 | 11862021             | 2 | 36 | C:0.0555556                    | T:0.944444        |

|                                             |          |   |    |                      |                 |
|---------------------------------------------|----------|---|----|----------------------|-----------------|
| chr28                                       | 11862382 | 2 | 36 | A:0.777778           | G:0.222222      |
| chr28                                       | 11862419 | 2 | 26 | G:0.692308           | T:0.307692      |
| chr28                                       | 11862432 | 2 | 24 | A:0.666667           | C:0.333333      |
| chr28                                       | 11862474 | 2 | 30 | A:0.633333           | G:0.366667      |
| chr28                                       | 11862665 | 2 | 34 | GA:1                 | G:0             |
| chr28                                       | 11862708 | 2 | 32 | TG:0.75              | T:0.25          |
| chr28                                       | 11862852 | 2 | 40 | A:0.025              | G:0.975         |
| chr28                                       | 11863064 | 2 | 38 | G:0.763158           | C:0.236842      |
| chr28                                       | 11863087 | 2 | 40 | G:0                  | A:1             |
| chr28                                       | 11863317 | 2 | 36 | TCAA:0.75            | T:0.25          |
| chr28                                       | 11863409 | 5 | 40 | AAG:0.2              | A:0.25          |
| AAGAGAGAG:0.35                              |          |   |    | AAGAGAGAG:0.05       |                 |
| chr28                                       | 11863543 | 2 | 38 | T:0.0263158          | G:0.973684      |
| chr28                                       | 11863601 | 2 | 40 | C:0.775              | A:0.225         |
| chr28                                       | 11863735 | 2 | 32 | C:1                  | T:0             |
| chr28                                       | 11863841 | 2 | 38 | C:0.473684           | T:0.526316      |
| chr28                                       | 11863912 | 2 | 38 | T:0.526316           | C:0.473684      |
| chr28                                       | 11864152 | 2 | 40 | A:0.525              | G:0.475         |
| chr28                                       | 11864492 | 2 | 40 | A:1                  | G:0             |
| chr28                                       | 11864653 | 2 | 38 | A:0.815789           | T:0.184211      |
| chr28                                       | 11864859 | 2 | 38 | C:0.0263158          | CCT:0.973684    |
| chr28                                       | 11865229 | 2 | 38 | T:0.526316           | C:0.473684      |
| chr28                                       | 11865376 | 2 | 38 | C:0.526316           | G:0.473684      |
| chr28                                       | 11865467 | 2 | 26 | TAGA:0.807692        | T:0.192308      |
| chr28                                       | 11865607 | 4 | 40 | C:0.225              | CTGTGTG:0       |
| CTGTGTGTGTG:0.325                           |          |   |    | CTGTGTGTGTGTGTG:0.45 |                 |
| chr28                                       | 11865639 | 2 | 38 | C:0.526316           | G:0.473684      |
| chr28                                       | 11865677 | 2 | 40 | A:0.725              | AAATG:0.275     |
| chr28                                       | 11865679 | 2 | 34 | ATAAATAAG:0.352941   | A:              |
| 0.647059                                    |          |   |    |                      |                 |
| chr28                                       | 11865687 | 2 | 40 | G:0.725              | A:0.275         |
| chr28                                       | 11865692 | 3 | 40 | CAAAT:0.725          | C:0             |
| 0.275                                       |          |   |    | TAAAT:               |                 |
| chr28                                       | 11865704 | 4 | 40 | T:0.725              | TAAATA:0        |
| TAAATAAATAAATA:0                            |          |   |    | TAAATAAATA:0.275     |                 |
| chr28                                       | 11865794 | 2 | 34 | C:0.970588           | T:0.0294118     |
| chr28                                       | 11866188 | 2 | 38 | T:1                  | C:0             |
| chr28                                       | 11866467 | 2 | 38 | G:0.0263158          | A:0.973684      |
| chr28                                       | 11866651 | 2 | 38 | C:0.0263158          | G:0.973684      |
| chr28                                       | 11866749 | 2 | 32 | G:0.125              | GA:0.875        |
| chr28                                       | 11866946 | 2 | 30 | ATTAAT:0.966667      | A:0.0333333     |
| chr28                                       | 11866955 | 2 | 34 | A:0.764706           | ATTTAT:0.235294 |
| chr28                                       | 11867008 | 2 | 24 | C:0.833333           | T:0.166667      |
| chr28                                       | 11867265 | 2 | 38 | C:0.973684           | A:0.0263158     |
| chr28                                       | 11867606 | 2 | 40 | C:0.725              | T:0.275         |
| chr28                                       | 11867663 | 2 | 38 | A:1                  | C:0             |
| chr28                                       | 11867677 | 2 | 38 | C:1                  | T:0             |
| chr28                                       | 11868484 | 2 | 38 | ATATACT:0.921053     | A:0.0789474     |
| chr28                                       | 11868566 | 2 | 38 | T:0.789474           | C:0.210526      |
| chr28                                       | 11868609 | 2 | 40 | G:1                  | A:0             |
| chr28                                       | 11868894 | 2 | 36 | T:0.666667           | TG:0.333333     |
| chr28                                       | 11868900 | 2 | 36 | ATC:0.666667         | A:0.333333      |
| chr28                                       | 11868905 | 2 | 36 | T:0.666667           |                 |
| TCAGACCATGAGGTATATCAAATTAGATGTGGCA:0.333333 |          |   |    |                      |                 |

|                         |          |   |    |                                |            |                |
|-------------------------|----------|---|----|--------------------------------|------------|----------------|
| chr28                   | 11869415 | 2 | 38 | G:1                            | A:0        |                |
| chr28                   | 11869471 | 2 | 38 | C:0.578947                     |            | T:0.421053     |
| chr28                   | 11869604 | 2 | 38 | C:0.789474                     |            | G:0.210526     |
| chr28                   | 11869666 | 2 | 38 | A:0.5                          | AT:0.5     |                |
| chr28                   | 11869801 | 2 | 38 | CT:0.0263158                   |            | C:0.973684     |
| chr28                   | 11869826 | 2 | 40 | C:0.975                        | T:0.025    |                |
| chr28                   | 11869857 | 2 | 38 | A:0.526316                     |            | C:0.473684     |
| chr28                   | 11870017 | 2 | 40 | A:0.55                         | AT:0.45    |                |
| chr28                   | 11870084 | 2 | 36 | T:0.527778                     |            | C:0.472222     |
| chr28                   | 11870558 | 2 | 34 | CA:0.0882353                   |            | C:0.911765     |
| chr28                   | 11870749 | 2 | 36 | T:0.638889                     |            | TC:0.361111    |
| chr28                   | 11870751 | 2 | 36 | C:0.555556                     |            | CG:0.444444    |
| chr28                   | 11870758 | 4 | 36 | C:0.472222                     |            | CAA:0.0277778  |
| CCCAA:0.305556          |          |   |    | CCCCAA:0.194444                |            |                |
| chr28                   | 11870817 | 2 | 34 | G:0.529412                     |            | A:0.470588     |
| chr28                   | 11870859 | 2 | 34 | G:1                            | A:0        |                |
| chr28                   | 11871195 | 2 | 38 | G:0.973684                     |            | A:0.0263158    |
| chr28                   | 11871288 | 2 | 40 | A:0.975                        | G:0.025    |                |
| chr28                   | 11871939 | 2 | 36 | C:0.527778                     |            | CAAAA:0.472222 |
| chr28                   | 11871970 | 2 | 36 | G:0.416667                     |            | A:0.583333     |
| chr28                   | 11872004 | 2 | 38 | G:0.0263158                    |            | T:0.973684     |
| chr28                   | 11872102 | 3 | 38 | GTT:0.289474                   |            | G:0.210526     |
| GTTT:0.5                |          |   |    |                                |            |                |
| chr28                   | 11872114 | 2 | 36 | T:0.75                         | A:0.25     |                |
| chr28                   | 11872115 | 3 | 38 | T:0.5                          | A:0.289474 | TAAA:          |
| 0.210526                |          |   |    |                                |            |                |
| chr28                   | 11872116 | 2 | 38 | A:0.5                          | T:0.5      |                |
| chr28                   | 11872293 | 4 | 32 | GTT:0.09375                    |            | G:0.375 GT:0   |
| GTTT:0.53125            |          |   |    |                                |            |                |
| chr28                   | 11872329 | 2 | 36 | C:0.555556                     |            | G:0.444444     |
| chr28                   | 11872333 | 2 | 36 | C:1                            | T:0        |                |
| chr28                   | 11872600 | 2 | 34 | G:0.558824                     |            | GA:0.441176    |
| chr28                   | 11873067 | 2 | 36 | A:0.444444                     |            | AGT:0.555556   |
| chr28                   | 11873070 | 4 | 38 | A:0.0526316                    |            | ATAG:0.236842  |
| ATAGTATAGTATAG:0.342105 |          |   |    | ATATAGTATAGTATAGTATAG:0.368421 |            |                |
| chr28                   | 11873397 | 2 | 40 | T:0.025                        | C:0.975    |                |
| chr28                   | 11873413 | 2 | 40 | C:0.8                          | T:0.2      |                |
| chr28                   | 11873422 | 2 | 40 | T:0.025                        | C:0.975    |                |
| chr28                   | 11873476 | 2 | 38 | G:0.973684                     |            | A:0.0263158    |
| chr28                   | 11873785 | 2 | 38 | A:1                            | G:0        |                |
| chr28                   | 11873991 | 2 | 36 | T:0.611111                     |            | A:0.388889     |
| chr28                   | 11874303 | 2 | 36 | A:1                            | C:0        |                |
| chr28                   | 11874403 | 2 | 34 | T:0.0588235                    |            | TC:0.941176    |
| chr28                   | 11874613 | 2 | 36 | C:0.472222                     |            | T:0.527778     |
| chr28                   | 11874662 | 2 | 38 | C:0.0526316                    |            | G:0.947368     |
| chr28                   | 11874841 | 2 | 38 | G:0.526316                     |            | A:0.473684     |
| chr28                   | 11874853 | 2 | 38 | T:1                            | C:0        |                |
| chr28                   | 11875008 | 2 | 40 | CA:1                           | C:0        |                |
| chr28                   | 11875013 | 2 | 40 | A:0.6                          | AAC:0.4    |                |
| chr28                   | 11875034 | 2 | 40 | AC:0.85                        | A:0.15     |                |
| chr28                   | 11875039 | 2 | 40 | AC:0.85                        | A:0.15     |                |
| chr28                   | 11875040 | 3 | 40 | C:1                            | A:0        | CAAA:0         |
| chr28                   | 11875046 | 2 | 40 | ACC:0.6                        | A:0.4      |                |
| chr28                   | 11875047 | 2 | 40 | C:0.525                        | A:0.475    |                |

|       |          |   |    |              |          |              |
|-------|----------|---|----|--------------|----------|--------------|
| chr28 | 11875048 | 3 | 40 | C:0.8        | CAA:0.2  | CAAAAAAAAA:0 |
| chr28 | 11875329 | 2 | 38 | C:0.5        | CT:0.5   |              |
| chr28 | 11875353 | 2 | 38 | G:0.0263158  |          | C:0.973684   |
| chr28 | 11875472 | 2 | 36 | G:0.5        | A:0.5    |              |
| chr28 | 11875746 | 2 | 38 | G:1          | A:0      |              |
| chr28 | 11875928 | 2 | 38 | A:0.473684   |          | G:0.526316   |
| chr28 | 11876735 | 2 | 40 | C:0.475      | T:0.525  |              |
| chr28 | 11876758 | 2 | 36 | A:0.722222   |          | AT:0.277778  |
| chr28 | 11876893 | 2 | 40 | A:0.5        | AT:0.5   |              |
| chr28 | 11877045 | 2 | 36 | T:0.5        | C:0.5    |              |
| chr28 | 11877356 | 2 | 38 | T:0.5        | C:0.5    |              |
| chr28 | 11877566 | 2 | 36 | C:0.972222   |          | T:0.027778   |
| chr28 | 11877714 | 2 | 36 | A:1          | G:0      |              |
| chr28 | 11877788 | 2 | 36 | AT:0.5       | A:0.5    |              |
| chr28 | 11877919 | 2 | 34 | G:1          | A:0      |              |
| chr28 | 11878099 | 2 | 40 | C:0.525      | T:0.475  |              |
| chr28 | 11878140 | 2 | 40 | T:0.975      | C:0.025  |              |
| chr28 | 11878157 | 2 | 40 | A:0.025      | G:0.975  |              |
| chr28 | 11878380 | 2 | 34 | C:0.558824   |          | T:0.441176   |
| chr28 | 11878898 | 2 | 36 | TC:0.555556  |          | T:0.444444   |
| chr28 | 11878899 | 2 | 36 | C:1          | T:0      |              |
| chr28 | 11878981 | 2 | 34 | A:0.970588   |          | G:0.0294118  |
| chr28 | 11879372 | 2 | 36 | G:0.611111   |          | A:0.388889   |
| chr28 | 11879468 | 2 | 36 | T:0          | C:1      |              |
| chr28 | 11879520 | 2 | 34 | C:0          | T:1      |              |
| chr28 | 11879527 | 2 | 34 | C:0          | T:1      |              |
| chr28 | 11879532 | 2 | 34 | C:0          | T:1      |              |
| chr28 | 11879539 | 2 | 34 | TG:0         | T:1      |              |
| chr28 | 11879542 | 2 | 34 | G:0          | GT:1     |              |
| chr28 | 11879590 | 2 | 30 | G:0          | T:1      |              |
| chr28 | 11879696 | 2 | 32 | A:1          | G:0      |              |
| chr28 | 11879839 | 2 | 38 | TA:0.710526  |          | T:0.289474   |
| chr28 | 11879919 | 2 | 40 | C:1          | T:0      |              |
| chr28 | 11880140 | 2 | 38 | T:0.5        | G:0.5    |              |
| chr28 | 11880412 | 2 | 38 | AG:0         | A:1      |              |
| chr28 | 11880549 | 2 | 32 | AT:0.96875   |          | A:0.03125    |
| chr28 | 11880555 | 2 | 32 | T:0.5625     | G:0.4375 |              |
| chr28 | 11881779 | 2 | 34 | G:0.5        | A:0.5    |              |
| chr28 | 11881837 | 2 | 36 | C:0.444444   |          | T:0.555556   |
| chr28 | 11882344 | 2 | 38 | G:0.526316   |          | T:0.473684   |
| chr28 | 11882615 | 2 | 36 | T:0.416667   |          | C:0.583333   |
| chr28 | 11883074 | 2 | 38 | G:0.973684   |          | C:0.0263158  |
| chr28 | 11883409 | 2 | 38 | G:0.5        | A:0.5    |              |
| chr28 | 11883866 | 2 | 38 | G:1          | T:0      |              |
| chr28 | 11883981 | 2 | 40 | T:0.45       | A:0.55   |              |
| chr28 | 11884006 | 2 | 38 | G:1          | T:0      |              |
| chr28 | 11884147 | 2 | 38 | G:0.447368   |          | A:0.552632   |
| chr28 | 11884208 | 2 | 36 | C:0.972222   |          | T:0.027778   |
| chr28 | 11884563 | 2 | 36 | A:0.333333   |          | G:0.666667   |
| chr28 | 11885008 | 2 | 38 | G:0.5        | A:0.5    |              |
| chr28 | 11885048 | 2 | 38 | C:1          | T:0      |              |
| chr28 | 11885990 | 2 | 36 | C:0.5        | T:0.5    |              |
| chr28 | 11886152 | 2 | 26 | GAT:0.692308 |          | G:0.307692   |
| chr28 | 11886155 | 2 | 26 | C:0.692308   |          | CA:0.307692  |

|                  |          |   |    |                              |             |             |
|------------------|----------|---|----|------------------------------|-------------|-------------|
| chr28            | 11886315 | 2 | 34 | ATTT:1                       | A:0         |             |
| chr28            | 11886318 | 3 | 34 | T:0.705882                   |             | A:0.294118  |
| TAAAAAAAAAAAAA:0 |          |   |    |                              |             |             |
| chr28            | 11886414 | 2 | 36 | G:0.472222                   |             | A:0.527778  |
| chr28            | 11886615 | 2 | 40 | G:0.3                        | T:0.7       |             |
| chr28            | 11887045 | 2 | 36 | T:0.555556                   |             | TA:0.444444 |
| chr28            | 11887409 | 2 | 36 | T:0.638889                   |             | C:0.361111  |
| chr28            | 11887582 | 2 | 38 | G:0.605263                   |             | A:0.394737  |
| chr28            | 11887973 | 2 | 40 | C:1                          | T:0         |             |
| chr28            | 11888154 | 2 | 36 | C:0.472222                   |             | T:0.527778  |
| chr28            | 11888210 | 2 | 36 | G:1                          | A:0         |             |
| chr28            | 11888556 | 2 | 36 | C:0.666667                   |             | G:0.333333  |
| chr28            | 11888695 | 2 | 38 | C:0.973684                   |             | A:0.0263158 |
| chr28            | 11889398 | 2 | 34 | C:0.588235                   |             | T:0.411765  |
| chr28            | 11889609 | 2 | 38 | G:1                          | A:0         |             |
| chr28            | 11890634 | 2 | 38 | G:0.973684                   |             | T:0.0263158 |
| chr28            | 11890884 | 2 | 38 | A:1                          | G:0         |             |
| chr28            | 11891477 | 2 | 40 | C:0.525                      | G:0.475     |             |
| chr28            | 11891523 | 2 | 40 | A:0.975                      | G:0.025     |             |
| chr28            | 11891537 | 2 | 38 | C:1                          | T:0         |             |
| chr28            | 11892124 | 2 | 40 | G:1                          | C:0         |             |
| chr28            | 11892190 | 2 | 40 | C:0.75                       | T:0.25      |             |
| chr28            | 11892692 | 2 | 40 | AG:1                         | A:0         |             |
| chr28            | 11892694 | 2 | 40 | C:1                          | T:0         |             |
| chr28            | 11893064 | 2 | 38 | A:1                          | G:0         |             |
| chr28            | 11893084 | 2 | 38 | G:0.973684                   |             | C:0.0263158 |
| chr28            | 11893095 | 2 | 38 | C:1                          | A:0         |             |
| chr28            | 11893182 | 2 | 34 | GA:0.441176                  |             | G:0.558824  |
| chr28            | 11893201 | 2 | 36 | G:0.472222                   |             | A:0.527778  |
| chr28            | 11893257 | 2 | 34 | A:0.5                        | G:0.5       |             |
| chr28            | 11893458 | 2 | 36 | G:0.5                        | C:0.5       |             |
| chr28            | 11893603 | 2 | 36 | C:0.916667                   |             | T:0.0833333 |
| chr28            | 11894628 | 2 | 36 | C:0.472222                   |             | T:0.527778  |
| chr28            | 11895309 | 2 | 36 | T:0.305556                   |             | C:0.694444  |
| chr28            | 11896364 | 2 | 40 | C:1                          | T:0         |             |
| chr28            | 11897117 | 2 | 40 | TCCTAAGC:0.675               |             | T:0.325     |
| chr28            | 11897146 | 2 | 40 | A:0.8                        | G:0.2       |             |
| chr28            | 11897231 | 2 | 36 | T:0.388889                   |             | G:0.611111  |
| chr28            | 11897412 | 2 | 36 | AT:1                         | A:0         |             |
| chr28            | 11897471 | 2 | 38 | C:0.736842                   |             | T:0.263158  |
| chr28            | 11897491 | 2 | 38 | A:0.736842                   |             | C:0.263158  |
| chr28            | 11897718 | 2 | 32 | G:0.78125                    |             | A:0.21875   |
| chr28            | 11897838 | 2 | 34 | A:0                          | T:1         |             |
| chr28            | 11898077 | 2 | 30 | C:0.666667                   |             | T:0.333333  |
| chr28            | 11898115 | 2 | 32 | C:0.5625                     | T:0.4375    |             |
| chr28            | 11898121 | 2 | 36 | AATATATATATATATATAT:0.194444 |             |             |
| A:0.805556       |          |   |    |                              |             |             |
| chr28            | 11898593 | 2 | 30 | ATG:0.733333                 |             | A:0.266667  |
| chr28            | 11898597 | 3 | 32 | G:0.5625                     | GTA:0.15625 | GTATA:      |
| 0.28125          |          |   |    |                              |             |             |
| chr28            | 11898767 | 2 | 36 | G:1                          | A:0         |             |
| chr28            | 11898859 | 2 | 36 | G:0.75                       | A:0.25      |             |
| chr28            | 11899659 | 2 | 36 | G:1                          | A:0         |             |
| chr28            | 11899683 | 2 | 34 | A:0.941176                   |             | G:0.0588235 |

|                |                   |    |               |                 |               |
|----------------|-------------------|----|---------------|-----------------|---------------|
| chr28          | 11899909 2        | 38 | A:1           | T:0             |               |
| chr28          | 11900076 2        | 38 | G:0.710526    |                 | A:0.289474    |
| chr28          | 11900354 2        | 30 | A:1           | T:0             |               |
| chr28          | 11900702 2        | 38 | C:0.763158    |                 | CT:0.236842   |
| chr28          | 11900739 2        | 36 | CT:1          | C:0             |               |
| chr28          | 11900952 4        | 36 | GAAA:0.222222 |                 | G:0.222222    |
| GAA:0.305556   | GAAAAA:0.25       |    |               |                 |               |
| chr28          | 11900971 2        | 36 | A:0.777778    |                 | T:0.222222    |
| chr28          | 11901038 2        | 38 | T:0.552632    |                 | G:0.447368    |
| chr28          | 11901103 4        | 34 | C:0.705882    |                 | CCT:0.0294118 |
| CCTCT:0.205882 | CCTCTCT:0.0588235 |    |               |                 |               |
| chr28          | 11901139 2        | 34 | AAAT:0.705882 |                 | A:0.294118    |
| chr28          | 11901142 2        | 34 | T:0.911765    |                 | TA:0.0882353  |
| chr28          | 11901145 2        | 34 | A:0.970588    |                 | ATT:0.0294118 |
| chr28          | 11901490 2        | 36 | G:1           | C:0             |               |
| chr28          | 11901529 2        | 36 | G:1           | A:0             |               |
| chr28          | 11901609 2        | 38 | G:0.552632    |                 | A:0.447368    |
| chr28          | 11901648 2        | 36 | T:0.138889    |                 | C:0.861111    |
| chr28          | 11901796 2        | 38 | C:0.605263    |                 | T:0.394737    |
| chr28          | 11901801 2        | 38 | A:0.236842    |                 | T:0.763158    |
| chr28          | 11902561 2        | 34 | G:0.764706    |                 | A:0.235294    |
| chr28          | 11902834 2        | 38 | A:0.289474    |                 | G:0.710526    |
| chr28          | 11902875 2        | 40 | T:0.975       | TTTTCTTTC:0.025 |               |
| chr28          | 11903577 2        | 32 | G:0.78125     |                 | A:0.21875     |
| chr28          | 11904397 2        | 38 | A:0.736842    |                 | G:0.263158    |
| chr28          | 11904411 2        | 40 | G:0.975       | GA:0.025        |               |
| chr28          | 11904423 2        | 40 | T:0.975       | TG:0.025        |               |
| chr28          | 11904429 2        | 36 | A:0.222222    |                 | G:0.777778    |
| chr28          | 11904966 2        | 36 | T:0.972222    |                 | G:0.0277778   |
| chr28          | 11905046 2        | 40 | A:0.975       | G:0.025         |               |
| chr28          | 11905088 2        | 36 | A:0.722222    |                 | AT:0.277778   |
| chr28          | 11905201 2        | 34 | C:0.294118    |                 | G:0.705882    |
| chr28          | 11905204 2        | 34 | C:0.794118    |                 | T:0.205882    |
| chr28          | 11905287 2        | 40 | T:0.225       | A:0.775         |               |
| chr28          | 11905538 2        | 34 | G:0.323529    |                 | A:0.676471    |
| chr28          | 11905562 2        | 36 | C:0.972222    |                 | A:0.0277778   |
| chr28          | 11905567 2        | 36 | G:0.972222    |                 | A:0.0277778   |
| chr28          | 11905695 2        | 38 | T:0.973684    |                 | A:0.0263158   |
| chr28          | 11905737 2        | 38 | GA:1          | G:0             |               |
| chr28          | 11905896 2        | 36 | AAC:0.944444  |                 | A:0.0555556   |
| chr28          | 11905908 2        | 38 | C:0.315789    |                 | A:0.684211    |
| chr28          | 11906048 2        | 38 | G:0.973684    |                 | C:0.0263158   |
| chr28          | 11906064 2        | 36 | T:0.25        | G:0.75          |               |
| chr28          | 11906235 2        | 32 | C:0.96875     |                 | A:0.03125     |
| chr28          | 11906252 2        | 36 | A:0.972222    |                 | T:0.0277778   |
| chr28          | 11906403 2        | 38 | A:0.947368    |                 | G:0.0526316   |
| chr28          | 11906470 2        | 40 | A:0.95        | G:0.05          |               |
| chr28          | 11906582 2        | 40 | G:0.8         | C:0.2           |               |
| chr28          | 11906587 2        | 38 | A:0.894737    |                 | G:0.105263    |
| chr28          | 11906709 2        | 40 | A:0.95        | G:0.05          |               |
| chr28          | 11906993 2        | 38 | T:0.947368    |                 | C:0.0526316   |
| chr28          | 11907074 2        | 36 | T:0.944444    |                 | TC:0.0555556  |
| chr28          | 11907188 2        | 38 | C:1           | T:0             |               |
| chr28          | 11907338 2        | 34 | AC:0.941176   |                 | A:0.0588235   |



|       |             |   |    |                         |                         |
|-------|-------------|---|----|-------------------------|-------------------------|
| chr28 | 11907340    | 2 | 34 | A:0.941176              | T:0.0588235             |
| chr28 | 11907516    | 2 | 38 | T:0.973684              | C:0.0263158             |
| chr28 | 11907594    | 2 | 34 | G:0.323529              | A:0.676471              |
| chr28 | 11907854    | 2 | 36 | GAAC:0.25               | G:0.75                  |
| chr28 | 11908150    | 2 | 38 | T:1                     | A:0                     |
| chr28 | 11908333    | 2 | 38 | A:0.710526              | G:0.289474              |
| chr28 | 11908483    | 2 | 38 | A:0.342105              | C:0.657895              |
| chr28 | 11908607    | 2 | 38 | A:0.526316              | G:0.473684              |
| chr28 | 11908661    | 2 | 36 | CT:1                    | C:0                     |
| chr28 | 11908670    | 2 | 36 | TA:0.777778             | T:0.222222              |
| chr28 | 11908671    | 2 | 36 | A:0.972222              | T:0.0277778             |
| chr28 | 11908792    | 2 | 32 | C:0.5                   | T:0.5                   |
| chr28 | 11908821    | 2 | 38 | C:0.605263              | G:0.394737              |
| chr28 | 11908827    | 2 | 38 | C:0.605263              | T:0.394737              |
| chr28 | 11909091    | 2 | 30 | C:0.466667              | T:0.533333              |
| chr28 | 11909359    | 2 | 38 | G:0.710526              | GTGAA:0.289474          |
| chr28 | 11909966    | 2 | 40 | TGA:0.725               | T:0.275                 |
| chr28 | 11910739    | 2 | 40 | C:0.75                  | CAAATATAAAAAATATAAAAAA: |
|       | 0.25        |   |    |                         |                         |
| chr28 | 11910742    | 2 | 40 | C:0.75                  | CAAAAAAT:0.25           |
| chr28 | 11910910    | 2 | 36 | G:0.722222              | C:0.277778              |
| chr28 | 11911220    | 2 | 40 | CTG:0.975               | C:0.025                 |
| chr28 | 11911433    | 2 | 38 | G:0.710526              | T:0.289474              |
| chr28 | 11911657    | 2 | 36 | C:1                     | T:0                     |
| chr28 | 11912001    | 3 | 36 | CTT:0.805556            | C:0.0833333             |
|       | CT:0.111111 |   |    |                         |                         |
| chr28 | 11912002    | 2 | 38 | T:0.473684              | TC:0.526316             |
| chr28 | 11912028    | 2 | 38 | C:0.684211              | T:0.315789              |
| chr28 | 11912031    | 2 | 38 | T:0.684211              | C:0.315789              |
| chr28 | 11912299    | 2 | 40 | C:1                     | T:0                     |
| chr28 | 11912379    | 2 | 40 | G:1                     | GTC:0                   |
| chr28 | 11912395    | 2 | 40 | C:1                     | G:0                     |
| chr28 | 11912418    | 2 | 40 | TAAA:1                  | T:0                     |
| chr28 | 11912629    | 2 | 40 | A:0.3                   | G:0.7                   |
| chr28 | 11912867    | 2 | 40 | T:1                     | C:0                     |
| chr28 | 11912928    | 2 | 36 | A:0.305556              | C:0.694444              |
| chr28 | 11912964    | 2 | 36 | T:0                     | TTGA:1                  |
| chr28 | 11913368    | 2 | 32 | T:0.6875                | A:0.3125                |
| chr28 | 11913502    | 2 | 40 | T:0.725                 | A:0.275                 |
| chr28 | 11913526    | 2 | 40 | C:0.7                   | T:0.3                   |
| chr28 | 11913869    | 2 | 34 | C:0.235294              | T:0.764706              |
| chr28 | 11914247    | 2 | 32 | A:0.71875               | T:0.28125               |
| chr28 | 11914547    | 2 | 32 | CTTT:0.875              | C:0.125                 |
| chr28 | 11914566    | 3 | 32 | TAAG:0.625              | T:0.25                  |
|       | 0.125       |   |    |                         | AAAG:                   |
| chr28 | 11914575    | 2 | 28 | T:0.642857              | C:0.357143              |
| chr28 | 11914582    | 2 | 28 | T:0.642857              | TAGAC:0.357143          |
| chr28 | 11914621    | 2 | 34 | C:0.411765              | G:0.588235              |
| chr28 | 11914627    | 2 | 34 | T:0.411765              | C:0.588235              |
| chr28 | 11914642    | 2 | 34 | C:0.411765              | G:0.588235              |
| chr28 | 11914711    | 2 | 36 | C:0.75                  | T:0.25                  |
| chr28 | 11915125    | 2 | 36 | G:0.555556              | A:0.444444              |
| chr28 | 11915222    | 2 | 40 | CTCTTACTCTTAGACCT:0.675 | C:0.325                 |
| chr28 | 11915267    | 2 | 38 | T:0.657895              | A:0.342105              |

|                    |          |   |    |                   |         |               |
|--------------------|----------|---|----|-------------------|---------|---------------|
| chr28              | 11915465 | 2 | 40 | A:0.6             | G:0.4   |               |
| chr28              | 11915522 | 2 | 34 | G:1               | T:0     |               |
| chr28              | 11915639 | 2 | 38 | G:0.526316        |         | A:0.473684    |
| chr28              | 11915812 | 2 | 40 | G:0.675           | A:0.325 |               |
| chr28              | 11915856 | 2 | 40 | T:1               | A:0     |               |
| chr28              | 11916054 | 2 | 34 | A:0.794118        |         | G:0.205882    |
| chr28              | 11916275 | 2 | 34 | G:1               | A:0     |               |
| chr28              | 11916371 | 2 | 36 | T:0.25            | G:0.75  |               |
| chr28              | 11916624 | 2 | 38 | C:1               | T:0     |               |
| chr28              | 11916653 | 2 | 38 | T:0.973684        |         | C:0.0263158   |
| chr28              | 11916841 | 2 | 36 | A:1               | G:0     |               |
| chr28              | 11918348 | 2 | 26 | G:0.576923        |         | A:0.423077    |
| chr28              | 11918457 | 2 | 28 | TA:0.928571       |         | T:0.0714286   |
| chr28              | 11918523 | 2 | 36 | G:0.416667        |         | GTT:0.583333  |
| chr28              | 11919089 | 2 | 38 | C:0.710526        |         | T:0.289474    |
| chr28              | 11919381 | 2 | 30 | A:0.233333        |         | G:0.766667    |
| chr28              | 11919506 | 3 | 40 | GGTGTGTGTGT:0.375 |         | G:0.275       |
| GGTGTGTGTGTGT:0.35 |          |   |    |                   |         |               |
| chr28              | 11920706 | 2 | 38 | CT:0.526316       |         | C:0.473684    |
| chr28              | 11921527 | 2 | 34 | G:1               | A:0     |               |
| chr28              | 11922160 | 2 | 38 | GA:1              | G:0     |               |
| chr28              | 11922375 | 2 | 40 | A:0.4             | T:0.6   |               |
| chr28              | 11922483 | 2 | 40 | C:1               | T:0     |               |
| chr28              | 11922543 | 2 | 36 | C:1               | T:0     |               |
| chr28              | 11922905 | 2 | 32 | A:1               | G:0     |               |
| chr28              | 11923553 | 2 | 36 | G:0.25            | C:0.75  |               |
| chr28              | 11924130 | 2 | 38 | A:0.421053        |         | G:0.578947    |
| chr28              | 11924200 | 2 | 38 | G:0.631579        |         | GA:0.368421   |
| chr28              | 11924543 | 3 | 34 | T:0.558824        |         | TA:0.294118   |
| TAA:0.147059       |          |   |    |                   |         |               |
| chr28              | 11924749 | 2 | 36 | C:0.972222        |         | T:0.0277778   |
| chr28              | 11924955 | 2 | 36 | G:0.972222        |         | C:0.0277778   |
| chr28              | 11925141 | 2 | 36 | C:1               | T:0     |               |
| chr28              | 11925145 | 2 | 36 | C:1               | T:0     |               |
| chr28              | 11925403 | 2 | 40 | T:0.55            | G:0.45  |               |
| chr28              | 11925465 | 3 | 36 | TAC:0.666667      |         | T:0.25 TACAC: |
| 0.0833333          |          |   |    |                   |         |               |
| chr28              | 11925618 | 2 | 36 | GTA:0.777778      |         | G:0.222222    |
| chr28              | 11926540 | 2 | 38 | C:1               | T:0     |               |
| chr28              | 11926790 | 2 | 28 | ATAT:1            | A:0     |               |
| chr28              | 11927064 | 2 | 40 | A:0.775           | G:0.225 |               |
| chr28              | 11927120 | 2 | 36 | C:1               | A:0     |               |
| chr28              | 11927127 | 2 | 36 | G:1               | A:0     |               |
| chr28              | 11927537 | 2 | 38 | A:1               | T:0     |               |
| chr28              | 11927971 | 2 | 40 | A:0.975           | G:0.025 |               |
| chr28              | 11928193 | 3 | 38 | GA:0.763158       |         | G:0.184211    |
| GAAAA:0.0526316    |          |   |    |                   |         |               |
| chr28              | 11928202 | 2 | 38 | A:0.657895        |         | G:0.342105    |
| chr28              | 11928669 | 2 | 36 | C:1               | T:0     |               |
| chr28              | 11929228 | 2 | 36 | A:1               | G:0     |               |
| chr28              | 11929501 | 2 | 32 | A:0.5             | T:0.5   |               |
| chr28              | 11929565 | 2 | 28 | T:0.25            | TG:0.75 |               |
| chr28              | 11929912 | 2 | 34 | A:0.323529        |         | T:0.676471    |
| chr28              | 11930389 | 2 | 38 | G:1               | C:0     |               |

|                                                       |          |   |    |                                  |                 |
|-------------------------------------------------------|----------|---|----|----------------------------------|-----------------|
| chr28                                                 | 11930492 | 2 | 34 | A:0.411765                       | G:0.588235      |
| chr28                                                 | 11930545 | 2 | 34 | G:0.147059                       | GAATA:0.852941  |
| chr28                                                 | 11930585 | 2 | 34 | CT:0.970588                      | C:0.0294118     |
| chr28                                                 | 11930846 | 2 | 36 | T:1                              | C:0             |
| chr28                                                 | 11931229 | 2 | 40 | C:1                              | T:0             |
| chr28                                                 | 11931810 | 2 | 38 | A:0.789474                       | G:0.210526      |
| chr28                                                 | 11931814 | 2 | 38 | C:0.973684                       | CTAAA:0.0263158 |
| chr28                                                 | 11932298 | 2 | 36 | G:0.75                           | T:0.25          |
| chr28                                                 | 11932598 | 2 | 38 | GTATATATATATATATATATATATATATATA: |                 |
| 0.473684 G:0.526316                                   |          |   |    |                                  |                 |
| chr28                                                 | 11932897 | 2 | 30 | G:0.5                            | A:0.5           |
| chr28                                                 | 11933330 | 2 | 38 | A:0.973684                       | AAAAT:0.0263158 |
| chr28                                                 | 11933512 | 2 | 36 | G:0.555556                       | GT:0.444444     |
| chr28                                                 | 11933888 | 2 | 40 | T:0.025                          | C:0.975         |
| chr28                                                 | 11934128 | 2 | 36 | C:1                              | T:0             |
| chr28                                                 | 11934241 | 2 | 40 | T:0.4                            | TC:0.6          |
| chr28                                                 | 11934242 | 5 | 40 | T:0.3                            | C:0.1           |
| TCTCTCTCTCTC:0 TCTCTCTCTCTCTC:0.275                   |          |   |    | TCTCTCTC:0.325                   |                 |
| chr28                                                 | 11934544 | 2 | 34 | CAG:0.764706                     | C:0.235294      |
| chr28                                                 | 11934741 | 2 | 36 | G:0.972222                       | A:0.0277778     |
| chr28                                                 | 11935044 | 2 | 38 | T:0.342105                       | A:0.657895      |
| chr28                                                 | 11935286 | 2 | 38 | C:0.973684                       | CA:0.0263158    |
| chr28                                                 | 11935773 | 2 | 38 | CCTCTCTCT:0.657895               | C:              |
| 0.342105                                              |          |   |    |                                  |                 |
| chr28                                                 | 11936014 | 2 | 38 | T:0.947368                       | TA:0.0526316    |
| chr28                                                 | 11936934 | 2 | 30 | T:0.666667                       | TA:0.333333     |
| chr28                                                 | 11937093 | 2 | 38 | G:1                              | T:0             |
| chr28                                                 | 11937180 | 2 | 38 | G:1                              | A:0             |
| chr28                                                 | 11937363 | 2 | 40 | T:1                              | A:0             |
| chr28                                                 | 11937914 | 2 | 34 | T:1                              | TAA:0           |
| chr28                                                 | 11937922 | 2 | 38 | A:0.842105                       | AT:0.157895     |
| chr28                                                 | 11937923 | 2 | 38 | A:0.815789                       | ATAT:0.184211   |
| chr28                                                 | 11937925 | 3 | 38 | A:0.815789                       | T:0.184211      |
| ATAT:0                                                |          |   |    |                                  |                 |
| chr28                                                 | 11937926 | 2 | 38 | A:1                              | AT:0            |
| chr28                                                 | 11937927 | 4 | 38 | A:0.236842                       | T:0.657895      |
| AT:0.105263 ATAT:0                                    |          |   |    |                                  |                 |
| chr28                                                 | 11937946 | 2 | 32 | A:0.25                           | G:0.75          |
| chr28                                                 | 11938525 | 3 | 40 | TA:0.6                           | T:0.25          |
| TTAAAAAA:0.15                                         |          |   |    |                                  |                 |
| chr28                                                 | 11938606 | 2 | 32 | G:1                              | A:0             |
| chr28                                                 | 11938703 | 2 | 34 | ATTTT:1                          | A:0             |
| chr28                                                 | 11938709 | 2 | 34 | T:1                              | TAAAAAA:0       |
| chr28                                                 | 11938710 | 2 | 34 | A:0.970588                       | T:0.0294118     |
| chr28                                                 | 11938757 | 5 | 38 | AAAATAAATAAATAAATAAAT:0.236842   |                 |
| A:0.342105 AAAAT:0 AAAATAAAT:0.421053 AAAATAAATAAAT:0 |          |   |    |                                  |                 |
| chr28                                                 | 11938798 | 2 | 38 | AAAT:0.973684                    | A:0.0263158     |
| chr28                                                 | 11938805 | 2 | 38 | TAAATAAATAAATA:0.973684 T:       |                 |
| 0.0263158                                             |          |   |    |                                  |                 |
| chr28                                                 | 11940234 | 2 | 36 | C:0.222222                       | G:0.777778      |
| chr28                                                 | 11940662 | 2 | 38 | T:0.815789                       | A:0.184211      |
| chr28                                                 | 11941067 | 2 | 26 | G:1                              | A:0             |
| chr28                                                 | 11941333 | 3 | 32 | GA:0.5625                        | G:0.375         |
| 0.0625 GAA:                                           |          |   |    |                                  |                 |
| chr28                                                 | 11941949 | 3 | 38 | CT:0.710526                      | C:0.236842      |

CTT:0.0526316  
 chr28 11942027 2 36 T:0.666667 A:0.333333  
 chr28 11942083 2 36 C:0.666667 CT:0.333333  
 chr28 11942208 2 40 A:1 G:0  
 chr28 11942504 2 40 T:1 C:0  
 chr28 11943099 2 40 G:0.975 A:0.025  
 chr28 11943182 2 38 T:0.552632 C:0.447368  
 chr28 11943470 3 34 C:0.617647 CT:0.294118  
 CTT:0.0882353  
 chr28 11943775 2 36 T:1 C:0  
 chr28 11943783 2 36 G:1 T:0  
 chr28 11944716 3 40 C:0.825 CTATT:0.175  
 CTATTTATT:0  
 chr28 11944733 2 38 TA:0.552632 T:0.447368  
 chr28 11944735 2 38 TTTATTTA:0.552632 T:  
 0.447368  
 chr28 11945088 2 38 A:0.947368 T:0.0526316  
 chr28 11945937 2 32 G:1 A:0  
 chr28 11946538 2 36 G:0.611111 A:0.388889  
 chr28 11946751 2 36 T:1 TG:0  
 chr28 11946778 2 36 A:0.583333 G:0.416667  
 chr28 11946871 2 36 C:0.972222 T:0.0277778  
 chr28 11947351 2 36 C:0.75 T:0.25  
 chr28 11947671 2 40 C:0.6 T:0.4  
 chr28 11947690 2 40 T:0.6 TC:0.4  
 chr28 11948105 2 30 T:0.566667 G:0.433333  
 chr28 11948372 2 28 G:1 C:0  
 chr28 11948644 2 34 T:1 C:0  
 chr28 11949722 2 40 C:1 T:0  
 chr28 11949766 2 38 G:0.605263 A:0.394737  
 chr28 11952122 2 38 TA:1 T:0  
 chr28 11952170 2 40 A:1 T:0  
 chr28 11953056 2 36 A:0.694444 G:0.305556  
 chr28 11953367 2 40 A:1 G:0  
 chr28 11953661 2 38 T:0 A:1  
 chr28 11953692 2 36 AGATAGAT:1 A:0  
 chr28 11953710 2 36 AGAT:0.944444 A:0.0555556  
 chr28 11953926 2 28 TGGGGG:0 T:1  
 chr28 11953931 2 28 G:0 GTCATT:1  
 chr28 11953980 2 34 C:0 G:1  
 chr28 11954267 2 34 GT:0.588235 G:0.411765  
 chr28 11954676 3 38 C:0.578947 CACAT:0.0526316  
 CACACAT:0.368421  
 chr28 11956227 2 38 T:0.947368 TCC:0.0526316  
 chr28 11957195 2 40 A:1 G:0  
 chr28 11957224 2 40 G:0.55 A:0.45  
 chr28 11957389 2 38 GTC:0.657895 G:0.342105  
 chr28 11957443 2 40 TA:1 T:0  
 chr28 11957444 2 40 A:1 T:0  
 chr28 11958561 2 38 C:1 T:0  
 chr28 11958875 2 38 A:0.394737 G:0.605263  
 chr28 11959680 2 40 T:0.05 C:0.95  
 chr28 11959744 2 38 C:0.657895 T:0.342105  
 chr28 11960152 2 38 C:1 A:0

|                        |          |                        |    |                |         |              |
|------------------------|----------|------------------------|----|----------------|---------|--------------|
| chr28                  | 11960153 | 2                      | 38 | A:1            | G:0     |              |
| chr28                  | 11960190 | 2                      | 38 | G:0.447368     |         | C:0.552632   |
| chr28                  | 11960659 | 2                      | 32 | T:0.96875      |         | C:0.03125    |
| chr28                  | 11960831 | 2                      | 38 | C:0.5          | T:0.5   |              |
| chr28                  | 11961189 | 4                      | 38 | TAAAA:0.131579 |         | T:0.263158   |
| TA:0.263158            |          | TAA:0.342105           |    |                |         |              |
| chr28                  | 11961209 | 2                      | 34 | C:0.970588     |         | T:0.0294118  |
| chr28                  | 11961560 | 2                      | 40 | A:1            | T:0     |              |
| chr28                  | 11961614 | 2                      | 38 | T:1            | C:0     |              |
| chr28                  | 11962378 | 2                      | 36 | A:0.972222     |         | G:0.0277778  |
| chr28                  | 11962816 | 2                      | 28 | G:0.428571     |         | T:0.571429   |
| chr28                  | 11963058 | 2                      | 34 | A:1            | T:0     |              |
| chr28                  | 11963604 | 2                      | 38 | G:0.315789     |         | T:0.684211   |
| chr28                  | 11964129 | 2                      | 38 | CCCAACAGT:1    |         | C:0          |
| chr28                  | 11964386 | 3                      | 38 | G:0.921053     |         | GA:0.0789474 |
| GAA:0                  |          |                        |    |                |         |              |
| chr28                  | 11964876 | 2                      | 38 | A:1            | G:0     |              |
| chr28                  | 11965104 | 2                      | 36 | C:0.638889     |         | CA:0.361111  |
| chr28                  | 11966279 | 2                      | 36 | C:1            | T:0     |              |
| chr28                  | 11966965 | 2                      | 38 | T:1            | C:0     |              |
| chr28                  | 11967211 | 2                      | 36 | G:0.972222     |         | A:0.0277778  |
| chr28                  | 11967480 | 2                      | 40 | C:0.675        | G:0.325 |              |
| chr28                  | 11967512 | 2                      | 40 | T:0.4          | C:0.6   |              |
| chr28                  | 11967802 | 2                      | 30 | T:0.966667     |         | TA:0.0333333 |
| chr28                  | 11967808 | 2                      | 30 | A:0.0333333    |         | AT:0.966667  |
| chr28                  | 11967885 | 2                      | 30 | C:1            | T:0     |              |
| chr28                  | 11968174 | 2                      | 34 | G:1            | A:0     |              |
| chr28                  | 11968322 | 2                      | 38 | C:0.0263158    |         | T:0.973684   |
| chr28                  | 11968856 | 4                      | 36 | TAAA:0.555556  |         | T:0.0555556  |
| TA:0.222222            |          | TAA:0.166667           |    |                |         |              |
| chr28                  | 11969669 | 2                      | 34 | T:0.676471     |         | TTC:0.323529 |
| chr28                  | 11970830 | 3                      | 34 | G:0.470588     |         | T:0.411765   |
| GT:0.117647            |          |                        |    |                |         |              |
| chr28                  | 11971952 | 2                      | 40 | T:0.05         | A:0.95  |              |
| chr28                  | 11972207 | 2                      | 40 | CT:0.675       | C:0.325 |              |
| chr28                  | 11972301 | 2                      | 38 | G:1            | A:0     |              |
| chr28                  | 11973488 | 2                      | 36 | T:0.0833333    |         | A:0.916667   |
| chr28                  | 11973621 | 2                      | 36 | C:0.972222     |         | T:0.0277778  |
| chr28                  | 11974765 | 6                      | 36 | TTTTA:0.444444 |         | T:0          |
| TTTTATTTA:0.111111     |          | TTTTATTTATTTA:0.194444 |    |                |         |              |
| TTTTATTTATTTATTTA:0.25 |          |                        |    |                |         |              |
| chr28                  | 11974832 | 2                      | 32 | C:0.75         | T:0.25  |              |
| chr28                  | 11975354 | 3                      | 40 | CCTCTCT:0.675  |         | C:0.325      |
| CCTCTCTCT:0            |          |                        |    |                |         |              |
| chr28                  | 11975970 | 2                      | 40 | TAA:0.6        | T:0.4   |              |
| chr28                  | 11976288 | 2                      | 36 | C:0.305556     |         | T:0.694444   |
| chr28                  | 11976388 | 2                      | 30 | C:1            | G:0     |              |
| chr28                  | 11976416 | 2                      | 40 | GA:1           | G:0     |              |
| chr28                  | 11977267 | 2                      | 38 | A:1            | T:0     |              |
| chr28                  | 11977593 | 2                      | 36 | TG:1           | T:0     |              |
| chr28                  | 11977594 | 2                      | 36 | G:0.611111     |         | T:0.388889   |
| chr28                  | 11977941 | 2                      | 28 | G:0.357143     |         | GCT:0.642857 |
| chr28                  | 11978498 | 2                      | 38 | C:0.973684     |         | T:0.0263158  |
| chr28                  | 11978698 | 2                      | 38 | C:1            | G:0     |              |

|                      |          |   |    |              |               |               |  |
|----------------------|----------|---|----|--------------|---------------|---------------|--|
| chr28                | 11979036 | 2 | 36 | C:0          | T:1           |               |  |
| chr28                | 11979037 | 2 | 36 | T:0          | A:1           |               |  |
| chr28                | 11979045 | 2 | 36 | G:0          | A:1           |               |  |
| chr28                | 11979095 | 3 | 40 | C:0          | A:0.325       | G:0.675       |  |
| chr28                | 11979096 | 2 | 40 | G:0          | A:1           |               |  |
| chr28                | 11979117 | 2 | 40 | C:0          | A:1           |               |  |
| chr28                | 11979120 | 2 | 40 | TG:0         | T:1           |               |  |
| chr28                | 11979122 | 2 | 40 | T:0          | A:1           |               |  |
| chr28                | 11979124 | 2 | 40 | T:0          | TA:1          |               |  |
| chr28                | 11979128 | 2 | 40 | G:0          | GA:1          |               |  |
| chr28                | 11979294 | 2 | 34 | G:0.647059   |               | A:0.352941    |  |
| chr28                | 11979403 | 2 | 40 | A:1          | T:0           |               |  |
| chr28                | 11979410 | 2 | 38 | T:0.631579   |               | TA:0.368421   |  |
| chr28                | 11979466 | 2 | 38 | A:0.973684   |               | G:0.0263158   |  |
| chr28                | 11979565 | 2 | 36 | T:1          | G:0           |               |  |
| chr28                | 11979783 | 2 | 38 | GA:1         | G:0           |               |  |
| chr28                | 11979986 | 2 | 34 | T:0.941176   |               | TA:0.0588235  |  |
| chr28                | 11980824 | 2 | 38 | T:1          | A:0           |               |  |
| chr28                | 11981157 | 2 | 34 | A:1          | G:0           |               |  |
| chr28                | 11981193 | 2 | 36 | T:0.611111   |               | C:0.388889    |  |
| chr28                | 11981412 | 2 | 32 | C:1          | A:0           |               |  |
| chr28                | 11981521 | 2 | 30 | AT:0.5       | A:0.5         |               |  |
| chr28                | 11981630 | 2 | 18 | G:1          | A:0           |               |  |
| chr28                | 11981868 | 2 | 32 | T:0.9375     | C:0.0625      |               |  |
| chr28                | 11981921 | 2 | 36 | G:1          | A:0           |               |  |
| chr28                | 11982155 | 2 | 38 | C:1          | T:0           |               |  |
| chr28                | 11982863 | 2 | 28 | TA:0.821429  |               | T:0.178571    |  |
| chr28                | 11982967 | 2 | 36 | T:0.583333   |               | G:0.416667    |  |
| chr28                | 11983015 | 2 | 30 | C:1          | T:0           |               |  |
| chr28                | 11984094 | 4 | 30 | TA:0.7       | T:0           | TAA:0.0333333 |  |
| TAAA:0.266667        |          |   |    |              |               |               |  |
| chr28                | 11984180 | 2 | 30 | A:1          | T:0           |               |  |
| chr28                | 11984232 | 2 | 34 | TA:0.941176  |               | T:0.0588235   |  |
| chr28                | 11984843 | 2 | 34 | T:0.588235   |               | C:0.411765    |  |
| chr28                | 11985322 | 4 | 40 | T:0.625      | TACACAC:0.125 |               |  |
| TACACACACACAC:0.1    |          |   |    |              |               |               |  |
| TACACACACACACAC:0.15 |          |   |    |              |               |               |  |
| chr28                | 11985341 | 2 | 38 | A:1          | ACACACG:0     |               |  |
| chr28                | 11986832 | 2 | 38 | C:0.552632   |               | T:0.447368    |  |
| chr28                | 11986972 | 2 | 40 | T:0.45       | G:0.55        |               |  |
| chr28                | 11987107 | 2 | 38 | C:0.631579   |               | T:0.368421    |  |
| chr28                | 11987193 | 2 | 38 | C:1          | CT:0          |               |  |
| chr28                | 11987203 | 3 | 38 | TAA:0.842105 |               | AAA:0.105263  |  |
| T:0.0526316          |          |   |    |              |               |               |  |
| chr28                | 11987204 | 2 | 36 | A:0.166667   |               | T:0.833333    |  |
| chr28                | 11987205 | 3 | 38 | A:0.605263   |               | T:0.342105    |  |
| ATTT:0.0526316       |          |   |    |              |               |               |  |
| chr28                | 11987394 | 2 | 36 | G:0.333333   |               | A:0.666667    |  |
| chr28                | 11987565 | 2 | 36 | C:0.611111   |               | G:0.388889    |  |
| chr28                | 11987567 | 2 | 38 | G:0.526316   |               | C:0.473684    |  |
| chr28                | 11987569 | 2 | 36 | T:0.0277778  |               | G:0.972222    |  |
| chr28                | 11987614 | 3 | 38 | A:0.0263158  |               | AC:0.921053   |  |
| AAC:0.0526316        |          |   |    |              |               |               |  |
| chr28                | 11987738 | 2 | 34 | G:0.588235   |               | A:0.411765    |  |
| chr28                | 11987792 | 2 | 38 | C:1          | T:0           |               |  |

|       |          |   |    |                |              |
|-------|----------|---|----|----------------|--------------|
| chr28 | 11987831 | 2 | 36 | CA:0.583333    | C:0.416667   |
| chr28 | 11987838 | 2 | 36 | AG:0.944444    | A:0.0555556  |
| chr28 | 11987939 | 2 | 38 | G:0.473684     | A:0.526316   |
| chr28 | 11988358 | 2 | 40 | T:0.625        | A:0.375      |
| chr28 | 11988666 | 2 | 36 | C:0.361111     | T:0.638889   |
| chr28 | 11989396 | 2 | 40 | C:0.05         | T:0.95       |
| chr28 | 11989706 | 2 | 40 | T:0.85         | C:0.15       |
| chr28 | 11989779 | 2 | 40 | C:0.15         | T:0.85       |
| chr28 | 11989837 | 2 | 40 | G:0.8          | A:0.2        |
| chr28 | 11989917 | 2 | 40 | A:0.175        | G:0.825      |
| chr28 | 11990163 | 2 | 34 | G:0.852941     | A:0.147059   |
| chr28 | 11990325 | 2 | 40 | T:0.9          | G:0.1        |
| chr28 | 11990723 | 2 | 38 | TTGAC:1        | T:0          |
| chr28 | 11990918 | 2 | 38 | TTGTC:0.973684 | T:0.0263158  |
| chr28 | 11990954 | 2 | 36 | A:1            | T:0          |
| chr28 | 11991092 | 2 | 36 | C:0.833333     | G:0.166667   |
| chr28 | 11991267 | 2 | 38 | C:1            | T:0          |
| chr28 | 11991290 | 2 | 36 | T:1            | C:0          |
| chr28 | 11991416 | 2 | 38 | G:0.184211     | A:0.815789   |
| chr28 | 11991771 | 2 | 38 | C:0.157895     | T:0.842105   |
| chr28 | 11992173 | 2 | 36 | A:0.0277778    | G:0.972222   |
| chr28 | 11992225 | 2 | 32 | TA:1           | T:0          |
| chr28 | 11992457 | 2 | 36 | T:0.916667     | C:0.0833333  |
| chr28 | 11992471 | 2 | 38 | CT:1           | C:0          |
| chr28 | 11992489 | 2 | 38 | C:1            | A:0          |
| chr28 | 11992545 | 2 | 38 | G:1            | A:0          |
| chr28 | 11992674 | 2 | 34 | GA:0.176471    | G:0.823529   |
| chr28 | 11993152 | 2 | 38 | A:0.0263158    | G:0.973684   |
| chr28 | 11993700 | 2 | 36 | A:0            | G:1          |
| chr28 | 11993701 | 2 | 38 | A:1            | G:0          |
| chr28 | 11994118 | 2 | 40 | A:1            | T:0          |
| chr28 | 11994154 | 2 | 40 | G:0.725        | A:0.275      |
| chr28 | 11995746 | 2 | 40 | T:0.975        | C:0.025      |
| chr28 | 11995875 | 2 | 34 | T:1            | A:0          |
| chr28 | 11996015 | 2 | 38 | C:0.921053     | T:0.0789474  |
| chr28 | 11996842 | 2 | 38 | T:0.131579     | C:0.868421   |
| chr28 | 11996881 | 2 | 38 | C:1            | T:0          |
| chr28 | 11996935 | 2 | 36 | G:0.0277778    | T:0.972222   |
| chr28 | 11997298 | 2 | 38 | G:0.947368     | GA:0.0526316 |
| chr28 | 11997605 | 2 | 36 | C:1            | T:0          |
| chr28 | 11997790 | 2 | 36 | G:0.972222     | GA:0.0277778 |
| chr28 | 11997824 | 2 | 34 | C:1            | G:0          |
| chr28 | 11998542 | 2 | 38 | C:0.0526316    | CT:0.947368  |
| chr28 | 11998797 | 2 | 38 | G:0            | C:1          |
| chr28 | 11998803 | 2 | 38 | G:0.868421     | A:0.131579   |
| chr28 | 11999041 | 2 | 38 | G:0.973684     | A:0.0263158  |
| chr28 | 11999424 | 2 | 40 | G:1            | T:0          |
