# Supplementary material for: Genome-Wide Analyses Suggest Mechanisms Involving Early B-Cell Development in Canine IgA Deficiency
Source: PubMed Central journal article supplement (PMC4520476; doi:10.1371/journal.pone.0133844), 2015-07-30
Supplement: pone.0133844.s015.pdf [file pone.0133844.s015.pdf]

Table S5: Allele frequencies based on 20 Labradors across chr28: 9000091-11999424 (canfam3)

| CHROM | POS     | N_ALLELES | N_CHR | {ALLELE:FREQ}                                                                                                          |
|-------|---------|-----------|-------|------------------------------------------------------------------------------------------------------------------------|
| chr28 | 9000091 | 2         | 38    | T:1 C:0                                                                                                                |
| chr28 | 9000246 | 2         | 38    | T:0.894737 TCAA:0.105263                                                                                               |
| chr28 | 9000473 | 2         | 40    | A:0.825 G:0.175                                                                                                        |
| chr28 | 9000522 | 2         | 40    | T:0.85 C:0.15                                                                                                          |
| chr28 | 9000657 | 2         | 40    | C:0.85 CTTTAT:0.15                                                                                                     |
| chr28 | 9000789 | 2         | 38    | T:0.842105 C:0.157895                                                                                                  |
| chr28 | 9000939 | 2         | 40    | CGG:0.85 C:0.15                                                                                                        |
| chr28 | 9001032 | 2         | 36    | C:0.777778 G:0.222222                                                                                                  |
| chr28 | 9001109 | 2         | 38    | C:0.894737 G:0.105263                                                                                                  |
| chr28 | 9001229 | 5         | 38    | GAGAGAAGAGA:0.210526 G:<br>0.0789474 GAGAGA:0.315789 GAGAGAAGAGAAGAGA:0.0526316<br>GAGAGAAGAGAAGAGAAGAGAAGAGA:0.342105 |
| chr28 | 9001674 | 2         | 38    | G:0.842105 A:0.157895                                                                                                  |
| chr28 | 9001787 | 2         | 40    | CA:0.85 C:0.15                                                                                                         |
| chr28 | 9001833 | 2         | 40    | A:0.85 G:0.15                                                                                                          |
| chr28 | 9001982 | 2         | 40    | AT:0.85 A:0.15                                                                                                         |
| chr28 | 9002236 | 2         | 40    | ATCCAGGAC:0.825 A:0.175                                                                                                |
| chr28 | 9002267 | 2         | 38    | C:0.815789 T:0.184211                                                                                                  |
| chr28 | 9002509 | 2         | 40    | C:0.85 T:0.15                                                                                                          |
| chr28 | 9002784 | 2         | 40    | A:0.825 G:0.175                                                                                                        |
| chr28 | 9002831 | 2         | 40    | C:0.825 T:0.175                                                                                                        |
| chr28 | 9003437 | 2         | 38    | T:0.868421 C:0.131579                                                                                                  |
| chr28 | 9003632 | 2         | 38    | G:0.894737 GCTCT:0.105263                                                                                              |
| chr28 | 9003633 | 2         | 38    | C:0.894737 CTCTT:0.105263                                                                                              |
| chr28 | 9003904 | 2         | 40    | C:0.85 T:0.15                                                                                                          |
| chr28 | 9004320 | 2         | 40    | A:0.65 C:0.35                                                                                                          |
| chr28 | 9004520 | 2         | 40    | A:0.65 C:0.35                                                                                                          |
| chr28 | 9004564 | 2         | 36    | A:0.833333 G:0.166667                                                                                                  |
| chr28 | 9004919 | 2         | 40    | T:0.85 C:0.15                                                                                                          |
| chr28 | 9005309 | 2         | 38    | A:0.763158 G:0.236842                                                                                                  |
| chr28 | 9005338 | 2         | 36    | T:0.805556 C:0.194444                                                                                                  |
| chr28 | 9005502 | 2         | 40    | G:0.925 C:0.075                                                                                                        |
| chr28 | 9005638 | 2         | 38    | G:0.973684 A:0.0263158                                                                                                 |
| chr28 | 9005688 | 2         | 38    | A:0.842105 C:0.157895                                                                                                  |
| chr28 | 9006019 | 2         | 38    | A:0.868421 AC:0.131579                                                                                                 |
| chr28 | 9006568 | 2         | 38    | T:0.631579 TA:0.368421                                                                                                 |
| chr28 | 9007042 | 2         | 36    | A:0.888889 C:0.111111                                                                                                  |
| chr28 | 9007529 | 2         | 38    | CA:0.868421 C:0.131579                                                                                                 |
| chr28 | 9008103 | 2         | 40    | T:0.85 C:0.15                                                                                                          |
| chr28 | 9008419 | 2         | 40    | C:0.825 T:0.175                                                                                                        |
| chr28 | 9008506 | 2         | 38    | CAGAG:0.842105 C:0.157895                                                                                              |
| chr28 | 9008594 | 2         | 32    | C:0.78125 T:0.21875                                                                                                    |
| chr28 | 9008801 | 2         | 40    | C:0.8 CA:0.2                                                                                                           |
| chr28 | 9008900 | 2         | 36    | T:0.75 TA:0.25                                                                                                         |
| chr28 | 9009257 | 2         | 38    | A:0.842105 G:0.157895                                                                                                  |
| chr28 | 9009318 | 2         | 36    | G:0.833333 A:0.166667                                                                                                  |
| chr28 | 9009369 | 2         | 40    | AAC:0.875 A:0.125                                                                                                      |
| chr28 | 9009943 | 2         | 38    | C:0.921053 T:0.0789474                                                                                                 |
| chr28 | 9010058 | 2         | 38    | GTT:0.868421 G:0.131579                                                                                                |
| chr28 | 9010471 | 2         | 36    | G:0.972222 A:0.0277778                                                                                                 |
| chr28 | 9011133 | 2         | 34    | A:0.823529 C:0.176471                                                                                                  |

|             |         |              |    |                  |                   |
|-------------|---------|--------------|----|------------------|-------------------|
| chr28       | 9011297 | 2            | 38 | G:0.868421       | A:0.131579        |
| chr28       | 9011572 | 2            | 38 | A:0.868421       | T:0.131579        |
| chr28       | 9011586 | 2            | 38 | TGTA:0.868421    | T:0.131579        |
| chr28       | 9012020 | 2            | 40 | CCTTTCTTTCT:0.85 | C:0.15            |
| chr28       | 9012155 | 2            | 38 | C:0.894737       | T:0.105263        |
| chr28       | 9012207 | 2            | 40 | GCTC:0.825       | G:0.175           |
| chr28       | 9012229 | 2            | 40 | G:0.825          | T:0.175           |
| chr28       | 9012232 | 2            | 40 | A:0.825          | C:0.175           |
| chr28       | 9012244 | 2            | 40 | C:0.825          | T:0.175           |
| chr28       | 9012364 | 2            | 38 | G:0.894737       | A:0.105263        |
| chr28       | 9012499 | 2            | 36 | C:0.833333       | T:0.166667        |
| chr28       | 9012965 | 2            | 38 | G:0.868421       | A:0.131579        |
| chr28       | 9013095 | 2            | 40 | C:0.85           | G:0.15            |
| chr28       | 9013098 | 2            | 40 | A:0.725          | G:0.275           |
| chr28       | 9013127 | 2            | 38 | T:0.815789       | C:0.184211        |
| chr28       | 9013382 | 2            | 38 | T:0.684211       | C:0.315789        |
| chr28       | 9013443 | 2            | 40 | G:0.825          | A:0.175           |
| chr28       | 9013453 | 2            | 40 | G:0.825          | A:0.175           |
| chr28       | 9013626 | 2            | 40 | C:0.8            | T:0.2             |
| chr28       | 9013745 | 2            | 40 | T:0.725          | C:0.275           |
| chr28       | 9013848 | 2            | 40 | C:0.875          | T:0.125           |
| chr28       | 9013894 | 2            | 40 | C:0.9            | T:0.1             |
| chr28       | 9013951 | 2            | 40 | C:0.825          | G:0.175           |
| chr28       | 9014048 | 2            | 40 | G:0.875          | A:0.125           |
| chr28       | 9014089 | 2            | 38 | A:0.631579       | C:0.368421        |
| chr28       | 9014093 | 2            | 38 | C:0.815789       | CA:0.184211       |
| chr28       | 9014112 | 2            | 38 | T:0.631579       | C:0.368421        |
| chr28       | 9014138 | 2            | 36 | T:0.638889       | G:0.361111        |
| chr28       | 9014282 | 2            | 40 | C:0.875          | T:0.125           |
| chr28       | 9014788 | 2            | 40 | G:0.875          | GTCA:0.125        |
| chr28       | 9014789 | 2            | 40 | G:0.875          | GGATCCTGATC:0.125 |
| chr28       | 9014793 | 2            | 40 | C:0.875          | T:0.125           |
| chr28       | 9014795 | 2            | 40 | CG:0.875         | C:0.125           |
| chr28       | 9014797 | 2            | 40 | G:0.875          | T:0.125           |
| chr28       | 9014841 | 2            | 38 | C:0.789474       | T:0.210526        |
| chr28       | 9014988 | 2            | 40 | G:0.85           | T:0.15            |
| chr28       | 9015209 | 2            | 40 | CAT:0.85         | C:0.15            |
| chr28       | 9015491 | 2            | 40 | A:0.925          | G:0.075           |
| chr28       | 9015823 | 2            | 36 | T:0.833333       | A:0.166667        |
| chr28       | 9016088 | 2            | 38 | C:0.921053       | G:0.0789474       |
| chr28       | 9016103 | 2            | 36 | A:0.777778       | G:0.222222        |
| chr28       | 9016322 | 2            | 38 | A:1              | AAT:0             |
| chr28       | 9016326 | 2            | 38 | CACAT:0.894737   | C:0.105263        |
| chr28       | 9016330 | 5            | 40 | T:0.6            | C:0.05            |
| TACAC:0.025 |         | TACACAC:0.15 |    |                  |                   |
| chr28       | 9016360 | 3            | 40 | C:0.825          | G:0.175           |
| chr28       | 9016682 | 2            | 38 | G:1              | GA:0              |
| chr28       | 9016800 | 2            | 40 | T:0.875          | A:0.125           |
| chr28       | 9016982 | 2            | 34 | A:0.823529       | G:0.176471        |
| chr28       | 9017130 | 3            | 40 | GAA:0.625        | G:0.075           |
| chr28       | 9017172 | 2            | 36 | A:0.75           | AAAGC:0.25        |
| chr28       | 9017284 | 2            | 40 | C:0.875          | T:0.125           |
| chr28       | 9017304 | 2            | 40 | T:0.875          | G:0.125           |
| chr28       | 9017446 | 2            | 38 | C:0.921053       | T:0.0789474       |

|              |              |   |    |                         |                 |
|--------------|--------------|---|----|-------------------------|-----------------|
| chr28        | 9017524      | 2 | 34 | TCTCTCC:0.911765        | T:0.0882353     |
| chr28        | 9017528      | 2 | 36 | TCC:0.361111            | T:0.638889      |
| chr28        | 9017953      | 2 | 40 | G:0.75                  | A:0.25          |
| chr28        | 9018548      | 2 | 38 | T:0.105263              | G:0.894737      |
| chr28        | 9018662      | 2 | 36 | C:0.805556              | G:0.194444      |
| chr28        | 9018674      | 2 | 36 | TA:0.722222             | T:0.277778      |
| chr28        | 9018856      | 5 | 40 | CAAATAAATAAAT:0.325     | C:0.275         |
| CTAAAT:0.075 | CTAAATAAAT:0 |   |    | CAAATAAATAAATAAAT:0.325 |                 |
| chr28        | 9018860      | 2 | 40 | T:1                     | TCTC:0          |
| chr28        | 9018864      | 2 | 40 | T:0.975                 | TCTC:0.025      |
| chr28        | 9019603      | 2 | 38 | C:0.894737              | T:0.105263      |
| chr28        | 9019751      | 2 | 38 | A:0.894737              | AT:0.105263     |
| chr28        | 9020694      | 2 | 40 | C:0.775                 | CAAAT:0.225     |
| chr28        | 9020794      | 2 | 40 | A:0.875                 | G:0.125         |
| chr28        | 9020798      | 2 | 40 | A:0.875                 | G:0.125         |
| chr28        | 9021002      | 2 | 32 | A:1                     | T:0             |
| chr28        | 9022289      | 2 | 38 | C:0.842105              | T:0.157895      |
| chr28        | 9022290      | 2 | 38 | A:0.710526              | G:0.289474      |
| chr28        | 9022351      | 2 | 38 | C:0.842105              | T:0.157895      |
| chr28        | 9022352      | 2 | 38 | G:0.842105              | A:0.157895      |
| chr28        | 9022420      | 2 | 36 | G:0.805556              | T:0.194444      |
| chr28        | 9022668      | 2 | 38 | AG:0.894737             | A:0.105263      |
| chr28        | 9022984      | 2 | 30 | C:0.733333              | CT:0.266667     |
| chr28        | 9023016      | 2 | 32 | G:0.84375               | T:0.15625       |
| chr28        | 9023157      | 2 | 40 | C:0.825                 | CTGTGTG:0.175   |
| chr28        | 9023159      | 3 | 40 | CTG:0.75                | C:0.075         |
| chr28        | 9023202      | 2 | 38 | GTG:0.175               |                 |
| chr28        | 9023408      | 2 | 40 | T:0.868421              | TA:0.131579     |
| chr28        | 9023408      | 2 | 40 | G:0.85                  | GTAAA:0.15      |
| chr28        | 9023450      | 3 | 40 | TGA:0.45                | T:0.275         |
| chr28        | 9023552      | 2 | 40 | TGAGA:0.275             |                 |
| chr28        | 9023552      | 2 | 40 | G:0.825                 | GATC:0.175      |
| chr28        | 9024684      | 2 | 36 | A:0.833333              | G:0.166667      |
| chr28        | 9024720      | 4 | 40 | T:0.475                 | TA:0.1          |
|              |              |   |    | TAA:0.25                | TAAA:0.175      |
| chr28        | 9024730      | 2 | 40 | A:0.7                   | AAAAAAAAAAG:0.3 |
| chr28        | 9024778      | 2 | 36 | C:0.888889              | T:0.111111      |
| chr28        | 9025290      | 2 | 40 | C:0.9                   | T:0.1           |
| chr28        | 9025339      | 2 | 40 | T:0.8                   | TG:0.2          |
| chr28        | 9025345      | 2 | 40 | A:0.8                   | T:0.2           |
| chr28        | 9025361      | 2 | 40 | T:0.875                 | A:0.125         |
| chr28        | 9025362      | 2 | 40 | A:0.875                 | T:0.125         |
| chr28        | 9025730      | 2 | 40 | AAT:0.8                 | A:0.2           |
| chr28        | 9025731      | 2 | 40 | AT:0.25                 | A:0.75          |
| chr28        | 9025899      | 2 | 32 | C:0.75                  | T:0.25          |
| chr28        | 9026013      | 2 | 40 | TG:0.85                 | T:0.15          |
| chr28        | 9026014      | 2 | 40 | G:0.85                  | T:0.15          |
| chr28        | 9026018      | 2 | 40 | T:0.85                  | A:0.15          |
| chr28        | 9026023      | 2 | 40 | T:0.85                  | A:0.15          |
| chr28        | 9026048      | 2 | 40 | C:0.725                 | T:0.275         |
| chr28        | 9026069      | 2 | 40 | G:0.85                  | C:0.15          |
| chr28        | 9026275      | 3 | 40 | TAA:0.7                 | T:0.125         |
| chr28        | 9026275      | 3 | 40 | TA:0.175                |                 |
| chr28        | 9026405      | 2 | 36 | G:0.805556              | A:0.194444      |
| chr28        | 9026635      | 2 | 38 | A:0.868421              | G:0.131579      |
| chr28        | 9026679      | 2 | 36 | T:0.861111              | C:0.138889      |
| chr28        | 9026960      | 2 | 38 | A:0.868421              | G:0.131579      |

|       |         |   |    |                         |                          |
|-------|---------|---|----|-------------------------|--------------------------|
| chr28 | 9027069 | 2 | 38 | C:0.815789              | A:0.184211               |
| chr28 | 9028226 | 2 | 40 | C:0.825                 | T:0.175                  |
| chr28 | 9028471 | 2 | 40 | C:0.85                  | T:0.15                   |
| chr28 | 9029031 | 2 | 38 | C:0.736842              | CA:0.263158              |
| chr28 | 9029032 | 2 | 40 | A:0.825                 | AAAAAAAAAATAAAAAAT:0.175 |
| chr28 | 9029064 | 2 | 38 | T:0.631579              | C:0.368421               |
| chr28 | 9029759 | 2 | 34 | C:0.705882              | CT:0.294118              |
| chr28 | 9029808 | 2 | 40 | CACAGAGAGAGAGAGAG:0.825 | C:0.175                  |
| chr28 | 9029810 | 3 | 40 | CAG:0.35                | C:0.35 CAGAG:0.3         |
| chr28 | 9029956 | 2 | 36 | G:0.805556              | GAGCC:0.194444           |
| chr28 | 9030144 | 2 | 38 | A:0.789474              | G:0.210526               |
| chr28 | 9030185 | 2 | 40 | T:0.75                  | A:0.25                   |
| chr28 | 9030186 | 2 | 40 | T:0.85                  | A:0.15                   |
| chr28 | 9030657 | 2 | 36 | G:0.888889              | A:0.111111               |
| chr28 | 9030699 | 2 | 38 | C:0.684211              | T:0.315789               |
| chr28 | 9031234 | 2 | 38 | G:0.789474              | A:0.210526               |
| chr28 | 9031701 | 2 | 38 | C:1                     | T:0                      |
| chr28 | 9031738 | 2 | 40 | T:0.875                 | C:0.125                  |
| chr28 | 9031741 | 3 | 40 | GT:0.625                | G:0.2 GTT:0.175          |
| chr28 | 9032465 | 2 | 38 | A:1                     | G:0                      |
| chr28 | 9033585 | 2 | 38 | T:0.842105              | A:0.157895               |
| chr28 | 9033586 | 2 | 38 | T:0.842105              | C:0.157895               |
| chr28 | 9033837 | 2 | 22 | TA:0.590909             | T:0.409091               |
| chr28 | 9034448 | 2 | 38 | G:0.815789              | A:0.184211               |
| chr28 | 9035127 | 2 | 40 | C:0.85                  | CTTAT:0.15               |
| chr28 | 9035331 | 2 | 40 | T:0.825                 | TAATA:0.175              |
| chr28 | 9036932 | 2 | 38 | T:0.815789              | C:0.184211               |
| chr28 | 9037083 | 2 | 38 | T:0.421053              | C:0.578947               |
| chr28 | 9037089 | 2 | 38 | T:0.868421              | C:0.131579               |
| chr28 | 9037329 | 2 | 38 | G:1                     | A:0                      |
| chr28 | 9037585 | 2 | 40 | G:0.9                   | GA:0.1                   |
| chr28 | 9037594 | 2 | 40 | C:0.975                 | A:0.025                  |
| chr28 | 9037846 | 2 | 36 | CTG:0.833333            | C:0.166667               |
| chr28 | 9038349 | 2 | 38 | A:0.842105              | G:0.157895               |
| chr28 | 9038962 | 2 | 38 | G:1                     | A:0                      |
| chr28 | 9039044 | 2 | 38 | T:0.710526              | G:0.289474               |
| chr28 | 9039059 | 2 | 38 | C:0.842105              | CCTT:0.157895            |
| chr28 | 9039125 | 2 | 38 | C:0.894737              | T:0.105263               |
| chr28 | 9039672 | 2 | 40 | G:1                     | A:0                      |
| chr28 | 9039766 | 2 | 38 | G:1                     | C:0                      |
| chr28 | 9040250 | 2 | 36 | T:0.861111              | C:0.138889               |
| chr28 | 9040258 | 2 | 38 | GC:1                    | G:0                      |
| chr28 | 9040648 | 2 | 38 | G:1                     | C:0                      |
| chr28 | 9040777 | 2 | 40 | C:1                     | CACTA:0                  |
| chr28 | 9040794 | 2 | 40 | A:1                     | G:0                      |
| chr28 | 9040979 | 2 | 40 | T:1                     | C:0                      |
| chr28 | 9040991 | 2 | 40 | ACT:1                   | A:0                      |
| chr28 | 9041256 | 2 | 38 | G:1                     | A:0                      |
| chr28 | 9041508 | 2 | 40 | A:1                     | C:0                      |
| chr28 | 9041559 | 2 | 38 | G:1                     | A:0                      |
| chr28 | 9041584 | 2 | 40 | CTT:1                   | C:0                      |
| chr28 | 9042088 | 2 | 36 | G:1                     | A:0                      |
| chr28 | 9042090 | 2 | 36 | A:1                     | T:0                      |
| chr28 | 9042656 | 2 | 40 | T:1                     | G:0                      |

|                                       |         |   |    |                        |       |             |  |
|---------------------------------------|---------|---|----|------------------------|-------|-------------|--|
| chr28                                 | 9042713 | 2 | 40 | C:1                    | T:0   |             |  |
| chr28                                 | 9043052 | 2 | 40 | GC:1                   | G:0   |             |  |
| chr28                                 | 9046466 | 2 | 36 | G:1                    | A:0   |             |  |
| chr28                                 | 9046907 | 2 | 40 | A:1                    | AAC:0 |             |  |
| chr28                                 | 9047244 | 2 | 36 | A:0                    | G:1   |             |  |
| chr28                                 | 9047405 | 2 | 38 | G:1                    | A:0   |             |  |
| chr28                                 | 9047791 | 2 | 34 | T:0                    | TG:1  |             |  |
| chr28                                 | 9048050 | 2 | 34 | T:1                    | C:0   |             |  |
| chr28                                 | 9048208 | 2 | 32 | AT:0                   | A:1   |             |  |
| chr28                                 | 9048224 | 2 | 24 | T:1                    | C:0   |             |  |
| chr28                                 | 9048896 | 2 | 36 | GC:1                   | G:0   |             |  |
| chr28                                 | 9049363 | 2 | 40 | AAAG:1                 | A:0   |             |  |
| chr28                                 | 9049366 | 3 | 40 | GAAGAAAGAAAGAAAGA:0.35 |       | G:0.375     |  |
| GAAGA:0.275                           |         |   |    |                        |       |             |  |
| chr28                                 | 9049429 | 2 | 40 | G:1                    | GA:0  |             |  |
| chr28                                 | 9050173 | 2 | 40 | TG:1                   | T:0   |             |  |
| chr28                                 | 9050240 | 2 | 40 | A:1                    | C:0   |             |  |
| chr28                                 | 9051784 | 2 | 40 | G:1                    | C:0   |             |  |
| chr28                                 | 9051823 | 2 | 36 | C:1                    | T:0   |             |  |
| chr28                                 | 9051826 | 2 | 36 | C:1                    | T:0   |             |  |
| chr28                                 | 9052674 | 2 | 38 | A:1                    | T:0   |             |  |
| chr28                                 | 9052923 | 2 | 32 | G:1                    | A:0   |             |  |
| chr28                                 | 9052947 | 4 | 36 | AACACACAC:0.222222     |       | A:          |  |
| 0.222222 AAC:0.333333 AACAC:0.222222  |         |   |    |                        |       |             |  |
| chr28                                 | 9053125 | 2 | 34 | G:1                    | A:0   |             |  |
| chr28                                 | 9053140 | 2 | 36 | A:0.888889             |       | G:0.111111  |  |
| chr28                                 | 9053532 | 2 | 36 | G:1                    | C:0   |             |  |
| chr28                                 | 9055264 | 2 | 36 | GT:0.666667            |       | G:0.333333  |  |
| chr28                                 | 9056134 | 2 | 40 | GGCAGCCCCCGTGGT:0.95   |       | G:0.05      |  |
| chr28                                 | 9056143 | 2 | 40 | C:1                    | G:0   |             |  |
| chr28                                 | 9056457 | 2 | 36 | A:1                    | G:0   |             |  |
| chr28                                 | 9057481 | 2 | 40 | T:1                    | A:0   |             |  |
| chr28                                 | 9058292 | 2 | 34 | T:1                    | TA:0  |             |  |
| chr28                                 | 9059203 | 2 | 28 | ATTTCTT:1              |       | A:0         |  |
| chr28                                 | 9059843 | 2 | 36 | G:1                    | C:0   |             |  |
| chr28                                 | 9060075 | 4 | 40 | TACAAA:0.8             |       | T:0.2       |  |
| TACAAAACAAA:0 TACAAAACAAAACAAAACAAA:0 |         |   |    |                        |       |             |  |
| chr28                                 | 9060852 | 2 | 38 | C:0.631579             |       | T:0.368421  |  |
| chr28                                 | 9061609 | 2 | 40 | A:1                    | C:0   |             |  |
| chr28                                 | 9061679 | 2 | 40 | A:1                    | G:0   |             |  |
| chr28                                 | 9061900 | 2 | 36 | C:1                    | T:0   |             |  |
| chr28                                 | 9062033 | 2 | 38 | TCGCTCACA:1            |       | T:0         |  |
| chr28                                 | 9062147 | 2 | 36 | G:1                    | A:0   |             |  |
| chr28                                 | 9062361 | 3 | 22 | TGG:0.545455           |       | T:0.0909091 |  |
| TG:0.363636                           |         |   |    |                        |       |             |  |
| chr28                                 | 9063282 | 2 | 24 | AC:0.916667            |       | A:0.0833333 |  |
| chr28                                 | 9063400 | 2 | 26 | G:0.423077             |       | C:0.576923  |  |
| chr28                                 | 9064386 | 2 | 32 | C:0.96875              |       | CTT:0.03125 |  |
| chr28                                 | 9064472 | 2 | 38 | G:1                    | GC:0  |             |  |
| chr28                                 | 9064477 | 2 | 38 | G:1                    | C:0   |             |  |
| chr28                                 | 9064668 | 2 | 36 | G:1                    | T:0   |             |  |
| chr28                                 | 9065709 | 2 | 38 | GA:0.921053            |       | G:0.0789474 |  |
| chr28                                 | 9066664 | 2 | 40 | G:0.7                  | A:0.3 |             |  |
| chr28                                 | 9066770 | 2 | 36 | A:1                    | G:0   |             |  |

|                                             |         |   |    |                    |             |             |  |
|---------------------------------------------|---------|---|----|--------------------|-------------|-------------|--|
| chr28                                       | 9067055 | 2 | 40 | G:1                | A:0         |             |  |
| chr28                                       | 9068116 | 2 | 40 | A:0.55             | AAAAG:0.45  |             |  |
| chr28                                       | 9068122 | 2 | 40 | A:1                | AAGAAAG:0   |             |  |
| chr28                                       | 9068140 | 2 | 40 | G:1                | A:0         |             |  |
| chr28                                       | 9068147 | 2 | 40 | A:1                | AAAG:0      |             |  |
| chr28                                       | 9068158 | 3 | 40 | G:0.425            | GAAGA:0.325 |             |  |
| GGAAGAAAGAAAGAAAGGAAGGAAGAAAGAAAGAAAGA:0.25 |         |   |    |                    |             |             |  |
| chr28                                       | 9068456 | 2 | 40 | C:1                | T:0         |             |  |
| chr28                                       | 9068849 | 2 | 40 | T:1                | TAAAAAA:0   |             |  |
| chr28                                       | 9068872 | 2 | 36 | GGAATA:1           | G:0         |             |  |
| chr28                                       | 9069173 | 2 | 38 | G:1                | A:0         |             |  |
| chr28                                       | 9069266 | 2 | 38 | A:1                | G:0         |             |  |
| chr28                                       | 9069399 | 2 | 30 | C:0.633333         |             | CA:0.366667 |  |
| chr28                                       | 9069746 | 2 | 40 | T:1                | C:0         |             |  |
| chr28                                       | 9070332 | 2 | 38 | A:1                | AGT:0       |             |  |
| chr28                                       | 9071571 | 2 | 38 | G:0.842105         |             | T:0.157895  |  |
| chr28                                       | 9071574 | 2 | 40 | G:1                | T:0         |             |  |
| chr28                                       | 9071694 | 2 | 40 | A:1                | G:0         |             |  |
| chr28                                       | 9071730 | 2 | 40 | G:1                | T:0         |             |  |
| chr28                                       | 9072256 | 2 | 36 | T:1                | A:0         |             |  |
| chr28                                       | 9073177 | 3 | 40 | TAA:0.6            | T:0         | TA:0.4      |  |
| chr28                                       | 9073184 | 2 | 40 | A:0.725            | T:0.275     |             |  |
| chr28                                       | 9073654 | 2 | 38 | T:1                | G:0         |             |  |
| chr28                                       | 9073869 | 2 | 34 | T:1                | C:0         |             |  |
| chr28                                       | 9073993 | 2 | 40 | A:0.65             | AT:0.35     |             |  |
| chr28                                       | 9073995 | 2 | 40 | A:0.65             | T:0.35      |             |  |
| chr28                                       | 9074033 | 2 | 36 | CAGATAGAG:0.611111 |             | C:          |  |
| 0.388889                                    |         |   |    |                    |             |             |  |
| chr28                                       | 9074037 | 3 | 38 | TAGAGAG:0.710526   | T:0.0789474 |             |  |
| TAGAG:0.210526                              |         |   |    |                    |             |             |  |
| chr28                                       | 9074750 | 2 | 36 | TA:0.611111        |             | T:0.388889  |  |
| chr28                                       | 9075130 | 2 | 38 | C:0.605263         |             | T:0.394737  |  |
| chr28                                       | 9075511 | 2 | 40 | CT:0.65            | C:0.35      |             |  |
| chr28                                       | 9075676 | 2 | 40 | A:0.7              | G:0.3       |             |  |
| chr28                                       | 9075684 | 2 | 40 | T:0.7              | A:0.3       |             |  |
| chr28                                       | 9076002 | 2 | 40 | C:0.95             | T:0.05      |             |  |
| chr28                                       | 9076092 | 2 | 40 | G:0.65             | C:0.35      |             |  |
| chr28                                       | 9076158 | 2 | 34 | T:0.588235         |             | C:0.411765  |  |
| chr28                                       | 9076182 | 2 | 34 | T:0.588235         |             | C:0.411765  |  |
| chr28                                       | 9076673 | 2 | 38 | CA:0.657895        |             | C:0.342105  |  |
| chr28                                       | 9076764 | 2 | 36 | T:0.777778         |             | C:0.222222  |  |
| chr28                                       | 9076812 | 2 | 38 | G:0.657895         |             | T:0.342105  |  |
| chr28                                       | 9076821 | 2 | 38 | T:0.657895         |             | G:0.342105  |  |
| chr28                                       | 9076835 | 2 | 38 | G:0.657895         |             | T:0.342105  |  |
| chr28                                       | 9076846 | 2 | 38 | C:0.657895         |             | T:0.342105  |  |
| chr28                                       | 9076857 | 2 | 38 | A:0.657895         |             | T:0.342105  |  |
| chr28                                       | 9076902 | 2 | 36 | T:0.722222         |             | C:0.277778  |  |
| chr28                                       | 9076908 | 2 | 36 | T:0.722222         |             | C:0.277778  |  |
| chr28                                       | 9076958 | 3 | 36 | TA:0.472222        |             | T:0.277778  |  |
| TAA:0.25                                    |         |   |    |                    |             |             |  |
| chr28                                       | 9077225 | 2 | 38 | C:0.605263         |             | T:0.394737  |  |
| chr28                                       | 9077262 | 2 | 38 | T:0.710526         |             | A:0.289474  |  |
| chr28                                       | 9077365 | 2 | 38 | A:0.763158         |             | G:0.236842  |  |
| chr28                                       | 9077504 | 2 | 38 | C:0.736842         |             | T:0.263158  |  |

|         |         |   |    |                  |               |
|---------|---------|---|----|------------------|---------------|
| chr28   | 9077715 | 2 | 38 | T:0.868421       | C:0.131579    |
| chr28   | 9077725 | 3 | 38 | C:0.868421       | CTTT:0.131579 |
| CTTTT:0 |         |   |    |                  |               |
| chr28   | 9078016 | 2 | 38 | GCAGT:0.789474   | G:0.210526    |
| chr28   | 9078201 | 2 | 36 | C:0.638889       | T:0.361111    |
| chr28   | 9078207 | 2 | 36 | A:0.638889       | G:0.361111    |
| chr28   | 9078254 | 2 | 34 | T:0.705882       | G:0.294118    |
| chr28   | 9078267 | 2 | 36 | C:0.611111       | A:0.388889    |
| chr28   | 9078294 | 2 | 38 | A:0.684211       | G:0.315789    |
| chr28   | 9078307 | 2 | 38 | T:0.657895       | TG:0.342105   |
| chr28   | 9078314 | 2 | 38 | G:0.657895       | A:0.342105    |
| chr28   | 9078760 | 2 | 40 | C:0.55           | CT:0.45       |
| chr28   | 9079172 | 2 | 40 | A:0.65           | G:0.35        |
| chr28   | 9079178 | 2 | 40 | G:0.65           | A:0.35        |
| chr28   | 9079196 | 2 | 40 | A:0.65           | G:0.35        |
| chr28   | 9079218 | 2 | 40 | A:0.65           | G:0.35        |
| chr28   | 9079312 | 2 | 38 | C:0.684211       | T:0.315789    |
| chr28   | 9079313 | 2 | 38 | CT:0.684211      | C:0.315789    |
| chr28   | 9079508 | 2 | 36 | C:0.777778       | T:0.222222    |
| chr28   | 9079509 | 2 | 36 | A:0.777778       | G:0.222222    |
| chr28   | 9079784 | 2 | 36 | C:1              | CT:0          |
| chr28   | 9080212 | 2 | 40 | G:1              | GCC:0         |
| chr28   | 9080216 | 2 | 40 | C:1              | CGA:0         |
| chr28   | 9080219 | 2 | 40 | T:0.725          | G:0.275       |
| chr28   | 9080220 | 2 | 40 | C:0.725          | A:0.275       |
| chr28   | 9080303 | 2 | 38 | G:0.526316       | A:0.473684    |
| chr28   | 9080344 | 2 | 38 | C:1              | T:0           |
| chr28   | 9080453 | 2 | 36 | T:0.666667       | C:0.333333    |
| chr28   | 9080484 | 2 | 34 | T:0.588235       | TA:0.411765   |
| chr28   | 9080539 | 2 | 38 | G:0.605263       | A:0.394737    |
| chr28   | 9081156 | 2 | 34 | C:0.676471       | CT:0.323529   |
| chr28   | 9081540 | 2 | 38 | A:0.552632       | C:0.447368    |
| chr28   | 9081732 | 2 | 36 | C:0.5            | A:0.5         |
| chr28   | 9082462 | 2 | 40 | C:0.625          | CT:0.375      |
| chr28   | 9082581 | 2 | 34 | G:0.558824       | A:0.441176    |
| chr28   | 9082712 | 2 | 38 | CAA:0.526316     | C:0.473684    |
| chr28   | 9082716 | 2 | 38 | T:0.526316       | C:0.473684    |
| chr28   | 9082732 | 2 | 38 | C:0.578947       | CTT:0.421053  |
| chr28   | 9082740 | 2 | 36 | C:0.166667       | T:0.833333    |
| chr28   | 9083013 | 2 | 38 | A:0.526316       | G:0.473684    |
| chr28   | 9083057 | 2 | 40 | T:0.475          | C:0.525       |
| chr28   | 9083137 | 2 | 40 | C:0.525          | T:0.475       |
| chr28   | 9083675 | 2 | 38 | CT:0.842105      | C:0.157895    |
| chr28   | 9084375 | 2 | 40 | CCT:0.625        | C:0.375       |
| chr28   | 9084629 | 2 | 36 | G:0.611111       | C:0.388889    |
| chr28   | 9084938 | 2 | 36 | G:0.527778       | A:0.472222    |
| chr28   | 9085196 | 2 | 34 | G:0.529412       | T:0.470588    |
| chr28   | 9085578 | 2 | 40 | G:0.525          | GCTCTCT:0.475 |
| chr28   | 9085618 | 2 | 38 | T:0.605263       | A:0.394737    |
| chr28   | 9086088 | 2 | 38 | CTT:0.605263     | C:0.394737    |
| chr28   | 9086258 | 2 | 36 | G:0.527778       | C:0.472222    |
| chr28   | 9086297 | 2 | 38 | CTTTATA:0.973684 | C:0.0263158   |
| chr28   | 9086512 | 2 | 38 | T:1              | C:0           |
| chr28   | 9086603 | 2 | 40 | T:0.825          | C:0.175       |

|              |         |   |    |                 |                       |                  |
|--------------|---------|---|----|-----------------|-----------------------|------------------|
| chr28        | 9086707 | 2 | 40 | C:0.65          | G:0.35                |                  |
| chr28        | 9086913 | 2 | 40 | T:0.575         | C:0.425               |                  |
| chr28        | 9087018 | 2 | 40 | A:0.175         | C:0.825               |                  |
| chr28        | 9087957 | 2 | 38 | A:0.5           | G:0.5                 |                  |
| chr28        | 9088172 | 3 | 40 | TA:0.65         | T:0.175               | TAA:0.175        |
| chr28        | 9088444 | 2 | 38 | TAGCTA:0.710526 |                       | T:0.289474       |
| chr28        | 9088609 | 2 | 26 | T:0.423077      |                       | TAA:0.576923     |
| chr28        | 9088684 | 2 | 36 | T:0.555556      |                       | C:0.444444       |
| chr28        | 9088799 | 2 | 30 | T:0.466667      |                       | TAA:0.533333     |
| chr28        | 9088927 | 2 | 38 | C:0.894737      |                       | G:0.105263       |
| chr28        | 9089022 | 2 | 36 | C:0.555556      |                       | A:0.444444       |
| chr28        | 9089105 | 2 | 38 | C:0.842105      |                       | T:0.157895       |
| chr28        | 9089203 | 2 | 38 | T:0.552632      |                       | A:0.447368       |
| chr28        | 9089232 | 2 | 38 | C:0.894737      |                       | CAGAGAG:0.105263 |
| chr28        | 9089415 | 2 | 40 | C:0.85          | T:0.15                |                  |
| chr28        | 9090136 | 2 | 34 | G:0.911765      |                       | A:0.0882353      |
| chr28        | 9090764 | 2 | 38 | A:0.842105      |                       | C:0.157895       |
| chr28        | 9090988 | 2 | 40 | A:0.525         | G:0.475               |                  |
| chr28        | 9091191 | 2 | 36 | C:0.861111      |                       | T:0.138889       |
| chr28        | 9091307 | 2 | 40 | C:0.85          | T:0.15                |                  |
| chr28        | 9091652 | 2 | 38 | C:0.710526      |                       | T:0.289474       |
| chr28        | 9091771 | 2 | 34 | GT:0.764706     |                       | G:0.235294       |
| chr28        | 9091923 | 2 | 38 | G:0.605263      |                       | A:0.394737       |
| chr28        | 9092080 | 2 | 38 | C:0.842105      |                       | G:0.157895       |
| chr28        | 9092223 | 2 | 40 | C:0.65          | T:0.35                |                  |
| chr28        | 9092909 | 2 | 36 | CT:0.638889     |                       | C:0.361111       |
| chr28        | 9093041 | 2 | 38 | C:0.657895      |                       | T:0.342105       |
| chr28        | 9093112 | 2 | 40 | G:0.65          | A:0.35                |                  |
| chr28        | 9093187 | 2 | 36 | CCT:0.472222    |                       | C:0.527778       |
| chr28        | 9093590 | 2 | 36 | CCT:0.75        | C:0.25                |                  |
| chr28        | 9093627 | 2 | 36 | TAAAA:0.805556  |                       | T:0.194444       |
| chr28        | 9093630 | 2 | 36 | A:0.944444      |                       | AT:0.0555556     |
| chr28        | 9093633 | 2 | 36 | A:0.944444      |                       | AT:0.0555556     |
| chr28        | 9093635 | 2 | 36 | A:0.805556      |                       | T:0.194444       |
| chr28        | 9093641 | 2 | 36 | A:0.944444      |                       | T:0.0555556      |
| chr28        | 9094162 | 2 | 36 | A:0.527778      |                       | G:0.472222       |
| chr28        | 9094920 | 2 | 40 | T:0.6           | G:0.4                 |                  |
| chr28        | 9095328 | 2 | 38 | G:0.868421      |                       | A:0.131579       |
| chr28        | 9095562 | 2 | 34 | CTCTG:0.676471  |                       | C:0.323529       |
| chr28        | 9095605 | 3 | 38 | AG:0.552632     |                       | A:0.315789       |
| AGG:0.131579 |         |   |    |                 |                       |                  |
| chr28        | 9095719 | 2 | 38 | G:1             | A:0                   |                  |
| chr28        | 9095822 | 2 | 38 | G:0.710526      |                       | T:0.289474       |
| chr28        | 9096051 | 2 | 36 | A:0.694444      |                       | G:0.305556       |
| chr28        | 9096278 | 2 | 36 | T:1             | G:0                   |                  |
| chr28        | 9096366 | 2 | 40 | TAC:0.475       |                       | T:0.525          |
| chr28        | 9096449 | 2 | 40 | C:1             | G:0                   |                  |
| chr28        | 9096503 | 2 | 40 | C:0.525         | CTTTTTTTTTTTTTT:0.475 |                  |
| chr28        | 9096636 | 2 | 40 | T:0.875         | C:0.125               |                  |
| chr28        | 9097105 | 2 | 36 | C:0.722222      |                       | T:0.277778       |
| chr28        | 9097982 | 2 | 38 | C:0.684211      |                       | T:0.315789       |
| chr28        | 9098466 | 2 | 40 | T:0.825         | A:0.175               |                  |
| chr28        | 9098761 | 2 | 40 | AC:0.725        | A:0.275               |                  |
| chr28        | 9099002 | 2 | 40 | C:0.875         | T:0.125               |                  |



|                         |         |   |    |                      |                  |
|-------------------------|---------|---|----|----------------------|------------------|
| chr28                   | 9099249 | 2 | 36 | T:0.5                | C:0.5            |
| chr28                   | 9099266 | 2 | 38 | G:0.868421           | T:0.131579       |
| chr28                   | 9099550 | 2 | 40 | T:0.925              | TAA:0.075        |
| chr28                   | 9099640 | 2 | 38 | A:0.894737           | C:0.105263       |
| chr28                   | 9100002 | 2 | 38 | G:0.868421           | A:0.131579       |
| chr28                   | 9100006 | 2 | 38 | C:1                  | T:0              |
| chr28                   | 9100067 | 2 | 40 | TTCTC:0.875          | T:0.125          |
| chr28                   | 9100103 | 2 | 38 | GA:0.894737          | G:0.105263       |
| chr28                   | 9100185 | 2 | 38 | G:0.710526           | C:0.289474       |
| chr28                   | 9100333 | 2 | 32 | T:0.9375             | C:0.0625         |
| chr28                   | 9100450 | 3 | 38 | C:0.684211           | CTCTG:0.289474   |
| CTCTCTCTCTCTG:0.0263158 |         |   |    |                      |                  |
| chr28                   | 9100716 | 2 | 34 | C:0.882353           | A:0.117647       |
| chr28                   | 9100869 | 2 | 40 | C:0.85               | T:0.15           |
| chr28                   | 9101114 | 2 | 40 | T:0.85               | C:0.15           |
| chr28                   | 9101296 | 2 | 38 | C:0.5                | G:0.5            |
| chr28                   | 9102150 | 2 | 40 | A:0.825              | G:0.175          |
| chr28                   | 9102269 | 2 | 38 | G:0.842105           | C:0.157895       |
| chr28                   | 9102282 | 2 | 38 | A:0.868421           | G:0.131579       |
| chr28                   | 9102285 | 2 | 38 | G:0.868421           | C:0.131579       |
| chr28                   | 9102675 | 2 | 38 | CCTGT:0.763158       | C:0.236842       |
| chr28                   | 9103023 | 2 | 40 | C:0.775              | T:0.225          |
| chr28                   | 9103084 | 2 | 36 | T:0.694444           | A:0.305556       |
| chr28                   | 9103085 | 2 | 38 | T:0.473684           | A:0.526316       |
| chr28                   | 9103207 | 2 | 36 | T:0.861111           | C:0.138889       |
| chr28                   | 9103230 | 2 | 36 | T:0                  | C:1              |
| chr28                   | 9103393 | 2 | 40 | T:0.9                | C:0.1            |
| chr28                   | 9103559 | 2 | 40 | G:0.9                | A:0.1            |
| chr28                   | 9104029 | 2 | 40 | A:0.85               | G:0.15           |
| chr28                   | 9104106 | 2 | 38 | C:0.868421           | G:0.131579       |
| chr28                   | 9104152 | 2 | 40 | TAAC:0.75            | T:0.25           |
| chr28                   | 9104461 | 2 | 40 | T:0.85               | TA:0.15          |
| chr28                   | 9104565 | 2 | 38 | CAATT:0.921053       | C:0.0789474      |
| chr28                   | 9104842 | 2 | 40 | C:0.85               | CTTTCTTTTCT:0.15 |
| chr28                   | 9104935 | 2 | 38 | A:0.921053           | G:0.0789474      |
| chr28                   | 9105010 | 2 | 40 | CTTTTTTTTGTTTT:0.825 | C:0.175          |
| chr28                   | 9105019 | 2 | 40 | GT:0.6               | G:0.4            |
| chr28                   | 9105026 | 2 | 40 | T:0.875              | G:0.125          |
| chr28                   | 9105332 | 2 | 38 | C:0.921053           | G:0.0789474      |
| chr28                   | 9105405 | 2 | 38 | G:0.552632           | A:0.447368       |
| chr28                   | 9105780 | 2 | 36 | G:1                  | A:0              |
| chr28                   | 9106125 | 2 | 40 | TCTTTCCC:0.85        | T:0.15           |
| chr28                   | 9106133 | 2 | 40 | A:0.85               | AGGT:0.15        |
| chr28                   | 9106477 | 2 | 38 | A:0.815789           | G:0.184211       |
| chr28                   | 9106924 | 2 | 32 | G:0.71875            | A:0.28125        |
| chr28                   | 9107300 | 2 | 38 | G:0.815789           | A:0.184211       |
| chr28                   | 9107320 | 2 | 38 | C:0.894737           | T:0.105263       |
| chr28                   | 9107462 | 2 | 36 | G:0.527778           | C:0.472222       |
| chr28                   | 9107744 | 2 | 38 | C:0.657895           | T:0.342105       |
| chr28                   | 9108048 | 2 | 38 | A:0.894737           | G:0.105263       |
| chr28                   | 9108085 | 2 | 40 | G:0.75               | A:0.25           |
| chr28                   | 9108126 | 2 | 40 | T:0.9                | C:0.1            |
| chr28                   | 9108519 | 2 | 36 | CTTT:0.861111        | C:0.138889       |
| chr28                   | 9108535 | 2 | 36 | T:0.861111           | A:0.138889       |

|       |         |   |    |                   |                |
|-------|---------|---|----|-------------------|----------------|
| chr28 | 9108685 | 2 | 40 | GAA:0.775         | G:0.225        |
| chr28 | 9108720 | 2 | 38 | T:0.842105        | C:0.157895     |
| chr28 | 9108873 | 2 | 40 | C:0.85 T:0.15     |                |
| chr28 | 9108950 | 2 | 38 | C:0.842105        | A:0.157895     |
| chr28 | 9108980 | 2 | 38 | AAAAAG:0.868421   | A:0.131579     |
| chr28 | 9109317 | 2 | 40 | T:1 A:0           |                |
| chr28 | 9109371 | 2 | 38 | A:0.842105        | G:0.157895     |
| chr28 | 9109634 | 2 | 34 | A:0.823529        | G:0.176471     |
| chr28 | 9109805 | 2 | 40 | C:0.85 T:0.15     |                |
| chr28 | 9110262 | 2 | 40 | A:0.875 G:0.125   |                |
| chr28 | 9110338 | 2 | 34 | G:0.852941        | A:0.147059     |
| chr28 | 9110411 | 2 | 36 | G:1 A:0           |                |
| chr28 | 9110488 | 2 | 36 | T:0.916667        | C:0.0833333    |
| chr28 | 9110514 | 3 | 38 | TA:0.842105       | T:0.157895     |
| TAA:0 |         |   |    |                   |                |
| chr28 | 9110601 | 2 | 38 | GA:1 G:0          |                |
| chr28 | 9110604 | 2 | 38 | GT:1 G:0          |                |
| chr28 | 9110928 | 2 | 40 | A:0.575 G:0.425   |                |
| chr28 | 9111013 | 2 | 38 | G:0.815789        | A:0.184211     |
| chr28 | 9111170 | 2 | 40 | A:0.875 C:0.125   |                |
| chr28 | 9111254 | 2 | 38 | G:0.921053        | GT:0.0789474   |
| chr28 | 9111556 | 2 | 40 | C:0.55 G:0.45     |                |
| chr28 | 9111695 | 2 | 40 | A:0.875 G:0.125   |                |
| chr28 | 9112237 | 2 | 40 | G:0.875 A:0.125   |                |
| chr28 | 9113042 | 2 | 40 | G:0.875 A:0.125   |                |
| chr28 | 9113206 | 2 | 36 | C:0.638889        | G:0.361111     |
| chr28 | 9113447 | 2 | 36 | TTTA:0.972222     | T:0.0277778    |
| chr28 | 9113448 | 2 | 36 | TTA:0.888889      | T:0.111111     |
| chr28 | 9113458 | 2 | 38 | TTTTA:0.868421    | T:0.131579     |
| chr28 | 9113486 | 2 | 36 | C:0.833333        | CAG:0.166667   |
| chr28 | 9113601 | 2 | 38 | C:0.842105        | A:0.157895     |
| chr28 | 9113608 | 2 | 36 | T:0.583333        | C:0.416667     |
| chr28 | 9113777 | 2 | 38 | TG:0.815789       | T:0.184211     |
| chr28 | 9113925 | 2 | 34 | TA:0.911765       | T:0.0882353    |
| chr28 | 9114091 | 2 | 38 | G:0.552632        | C:0.447368     |
| chr28 | 9114192 | 2 | 40 | C:0.9 A:0.1       |                |
| chr28 | 9114394 | 2 | 40 | T:0.6 A:0.4       |                |
| chr28 | 9114401 | 2 | 40 | C:0.875 CAA:0.125 |                |
| chr28 | 9114999 | 2 | 36 | C:0.861111        | T:0.138889     |
| chr28 | 9115428 | 2 | 38 | C:0.894737        | T:0.105263     |
| chr28 | 9115456 | 2 | 40 | A:0.925 G:0.075   |                |
| chr28 | 9115654 | 2 | 40 | A:0.825 G:0.175   |                |
| chr28 | 9115933 | 2 | 38 | G:0.605263        | GTTGT:0.394737 |
| chr28 | 9116460 | 2 | 40 | C:0.9 T:0.1       |                |
| chr28 | 9117028 | 2 | 40 | T:0.725 A:0.275   |                |
| chr28 | 9117210 | 2 | 38 | T:0.710526        | C:0.289474     |
| chr28 | 9117252 | 2 | 38 | A:0.763158        | G:0.236842     |
| chr28 | 9117980 | 2 | 40 | A:0.9 T:0.1       |                |
| chr28 | 9117981 | 3 | 40 | AAG:0.9 A:0.1     | GAG:0          |
| chr28 | 9118004 | 2 | 40 | C:0.9 T:0.1       |                |
| chr28 | 9118072 | 2 | 36 | GAAA:0.888889     | G:0.111111     |
| chr28 | 9118145 | 2 | 36 | C:0.861111        | T:0.138889     |
| chr28 | 9118226 | 2 | 40 | T:0.85 C:0.15     |                |
| chr28 | 9118408 | 2 | 38 | T:0.868421        | C:0.131579     |

|              |         |   |    |                                 |             |          |
|--------------|---------|---|----|---------------------------------|-------------|----------|
| chr28        | 9118672 | 2 | 38 | T:0.894737                      | A:0.105263  |          |
| chr28        | 9118674 | 2 | 38 | C:0.894737                      | A:0.105263  |          |
| chr28        | 9118781 | 3 | 36 | CT:0.361111                     | C:0.361111  |          |
| CTT:0.277778 |         |   |    |                                 |             |          |
| chr28        | 9118803 | 2 | 40 | TTTTA:0.5                       | T:0.5       |          |
| chr28        | 9119002 | 2 | 38 | G:1                             | T:0         |          |
| chr28        | 9119203 | 2 | 36 | G:0.833333                      | A:0.166667  |          |
| chr28        | 9119345 | 3 | 38 | TA:0.5                          | T:0.184211  | TAAA:    |
| 0.315789     |         |   |    |                                 |             |          |
| chr28        | 9119362 | 2 | 38 | A:0.894737                      | AT:0.105263 |          |
| chr28        | 9119470 | 2 | 38 | T:0.894737                      | A:0.105263  |          |
| chr28        | 9119870 | 3 | 36 | AT:0.583333                     | A:0         | ATGTTTT: |
| 0.416667     |         |   |    |                                 |             |          |
| chr28        | 9120006 | 2 | 36 | G:0.888889                      | A:0.111111  |          |
| chr28        | 9120038 | 2 | 38 | A:0.552632                      | G:0.447368  |          |
| chr28        | 9120081 | 2 | 36 | C:0.833333                      | T:0.166667  |          |
| chr28        | 9120109 | 2 | 36 | C:0.722222                      | T:0.277778  |          |
| chr28        | 9120303 | 2 | 40 | C:0.85                          | T:0.15      |          |
| chr28        | 9120801 | 2 | 40 | C:0.5                           | T:0.5       |          |
| chr28        | 9121069 | 2 | 40 | G:0.825                         | A:0.175     |          |
| chr28        | 9121180 | 2 | 36 | C:0.861111                      | CT:0.138889 |          |
| chr28        | 9121516 | 2 | 34 | A:0.617647                      | G:0.382353  |          |
| chr28        | 9122021 | 2 | 40 | AGGACATTTGGGCAGTGATGTTTTT:0.725 |             |          |
| A:0.275      |         |   |    |                                 |             |          |
| chr28        | 9122067 | 2 | 40 | T:0.825                         | TA:0.175    |          |
| chr28        | 9122560 | 2 | 36 | C:0.75                          | T:0.25      |          |
| chr28        | 9122818 | 2 | 40 | G:0.9                           | A:0.1       |          |
| chr28        | 9122925 | 2 | 38 | A:0.894737                      | C:0.105263  |          |
| chr28        | 9123875 | 2 | 40 | C:0.85                          | T:0.15      |          |
| chr28        | 9123928 | 2 | 40 | C:0.85                          | T:0.15      |          |
| chr28        | 9123957 | 2 | 38 | T:0.578947                      | C:0.421053  |          |
| chr28        | 9124006 | 2 | 40 | CCTCTCTCT:0.875                 | C:0.125     |          |
| chr28        | 9124042 | 2 | 40 | A:0.85                          | T:0.15      |          |
| chr28        | 9124060 | 2 | 40 | A:0.85                          | C:0.15      |          |
| chr28        | 9124061 | 2 | 40 | C:1                             | A:0         |          |
| chr28        | 9124281 | 2 | 40 | T:0.8                           | C:0.2       |          |
| chr28        | 9124572 | 2 | 36 | T:0.861111                      | TC:0.138889 |          |
| chr28        | 9124752 | 2 | 38 | T:0.868421                      | C:0.131579  |          |
| chr28        | 9124828 | 3 | 28 | CT:0.357143                     | C:0.464286  |          |
| CTT:0.178571 |         |   |    |                                 |             |          |
| chr28        | 9124843 | 2 | 36 | T:0.861111                      | A:0.138889  |          |
| chr28        | 9124899 | 2 | 26 | C:0.923077                      | G:0.0769231 |          |
| chr28        | 9124901 | 2 | 26 | C:0.923077                      | G:0.0769231 |          |
| chr28        | 9124972 | 2 | 38 | G:0.842105                      | A:0.157895  |          |
| chr28        | 9124982 | 2 | 38 | G:0.842105                      | A:0.157895  |          |
| chr28        | 9125096 | 2 | 40 | A:0.875                         | G:0.125     |          |
| chr28        | 9126738 | 2 | 38 | T:0.868421                      | C:0.131579  |          |
| chr28        | 9127083 | 2 | 36 | C:0.888889                      | T:0.111111  |          |
| chr28        | 9127129 | 2 | 40 | CCTCT:1                         | C:0         |          |
| chr28        | 9127181 | 2 | 40 | TTAAAA:0.975                    | T:0.025     |          |
| chr28        | 9127226 | 2 | 40 | A:0.85                          | C:0.15      |          |
| chr28        | 9127250 | 2 | 40 | G:0.85                          | GA:0.15     |          |
| chr28        | 9127363 | 2 | 40 | T:0.85                          | A:0.15      |          |
| chr28        | 9127803 | 2 | 40 | T:0.9                           | TA:0.1      |          |

|                         |         |   |    |                     |                |
|-------------------------|---------|---|----|---------------------|----------------|
| chr28                   | 9127952 | 2 | 38 | A:0.921053          | G:0.0789474    |
| chr28                   | 9128086 | 2 | 40 | T:0.675 C:0.325     |                |
| chr28                   | 9128585 | 2 | 40 | G:0.9 T:0.1         |                |
| chr28                   | 9128938 | 2 | 38 | T:0.815789          | C:0.184211     |
| chr28                   | 9129276 | 2 | 40 | C:0.825 T:0.175     |                |
| chr28                   | 9129297 | 2 | 40 | C:0.85 A:0.15       |                |
| chr28                   | 9129460 | 2 | 36 | A:0.888889          | G:0.111111     |
| chr28                   | 9129912 | 2 | 40 | T:0.85 C:0.15       |                |
| chr28                   | 9129963 | 2 | 38 | C:0.526316          | T:0.473684     |
| chr28                   | 9129964 | 2 | 38 | A:0.526316          | G:0.473684     |
| chr28                   | 9130261 | 2 | 36 | T:0.916667          | C:0.0833333    |
| chr28                   | 9130795 | 2 | 38 | C:0.710526          | T:0.289474     |
| chr28                   | 9130813 | 2 | 36 | T:0.694444          | C:0.305556     |
| chr28                   | 9130936 | 2 | 40 | T:0.85 C:0.15       |                |
| chr28                   | 9130939 | 2 | 40 | A:0.85 G:0.15       |                |
| chr28                   | 9131645 | 2 | 20 | G:0.85 A:0.15       |                |
| chr28                   | 9132326 | 2 | 32 | T:0.375 C:0.625     |                |
| chr28                   | 9132540 | 2 | 40 | T:0.775 C:0.225     |                |
| chr28                   | 9134968 | 2 | 38 | C:0.894737          | T:0.105263     |
| chr28                   | 9135012 | 2 | 28 | TA:0.464286         | T:0.535714     |
| chr28                   | 9135153 | 2 | 38 | C:0.789474          | T:0.210526     |
| chr28                   | 9135492 | 3 | 34 | TA:0.411765         | T:0.411765     |
| TAAA:0.176471           |         |   |    |                     |                |
| chr28                   | 9135625 | 2 | 34 | T:0.882353          | A:0.117647     |
| chr28                   | 9136723 | 2 | 40 | CAT:1 C:0           |                |
| chr28                   | 9136768 | 2 | 38 | T:0.868421          | G:0.131579     |
| chr28                   | 9136846 | 2 | 40 | A:0.875 T:0.125     |                |
| chr28                   | 9136848 | 2 | 40 | G:0.875 T:0.125     |                |
| chr28                   | 9136969 | 2 | 40 | G:0.875 A:0.125     |                |
| chr28                   | 9137075 | 2 | 36 | CT:0.805556         | C:0.194444     |
| chr28                   | 9137096 | 2 | 38 | TTTTA:0.657895      | T:0.342105     |
| chr28                   | 9137144 | 2 | 38 | T:0.894737          | C:0.105263     |
| chr28                   | 9137614 | 2 | 38 | A:1 C:0             |                |
| chr28                   | 9138170 | 3 | 40 | C:0.65 CCTCT:0.275  |                |
| CCTCTCTCTCTCTCTCT:0.075 |         |   |    |                     |                |
| chr28                   | 9138203 | 2 | 38 | GAATA:0.894737      | G:0.105263     |
| chr28                   | 9138235 | 2 | 36 | T:0.138889          | TA:0.861111    |
| chr28                   | 9139044 | 2 | 38 | A:0.947368          | G:0.0526316    |
| chr28                   | 9139062 | 2 | 38 | C:0.631579          | CTTCT:0.368421 |
| chr28                   | 9139324 | 2 | 40 | C:0.9 CACAGAGAG:0.1 |                |
| chr28                   | 9139613 | 2 | 36 | G:1 C:0             |                |
| chr28                   | 9139644 | 2 | 38 | G:1 T:0             |                |
| chr28                   | 9139804 | 2 | 38 | G:0.684211          | T:0.315789     |
| chr28                   | 9139909 | 2 | 38 | C:0.921053          | G:0.0789474    |
| chr28                   | 9140077 | 2 | 40 | A:1 T:0             |                |
| chr28                   | 9140530 | 2 | 40 | G:0.65 C:0.35       |                |
| chr28                   | 9140720 | 2 | 40 | G:0.85 A:0.15       |                |
| chr28                   | 9140804 | 2 | 38 | C:0.842105          | CTG:0.157895   |
| chr28                   | 9141197 | 2 | 40 | T:0.925 TA:0.075    |                |
| chr28                   | 9141271 | 2 | 38 | A:0.868421          | T:0.131579     |
| chr28                   | 9141396 | 2 | 38 | G:0.815789          | C:0.184211     |
| chr28                   | 9142392 | 2 | 34 | G:0.852941          | A:0.147059     |
| chr28                   | 9142600 | 2 | 36 | A:0.861111          | T:0.138889     |
| chr28                   | 9142635 | 2 | 36 | A:0.5 AT:0.5        |                |

|                         |         |   |    |                                     |                  |
|-------------------------|---------|---|----|-------------------------------------|------------------|
| chr28                   | 9142668 | 2 | 38 | TAGAC:0.921053                      | T:0.0789474      |
| chr28                   | 9142680 | 3 | 40 | AAGAGAGAG:0.625                     | A:0.1            |
| AAGAGAGAGAG:0.275       |         |   |    |                                     |                  |
| chr28                   | 9142841 | 3 | 34 | TCC:0.470588                        | T:0.411765       |
| TC:0.117647             |         |   |    |                                     |                  |
| chr28                   | 9142881 | 2 | 36 | T:0.944444                          | TA:0.0555556     |
| chr28                   | 9143006 | 2 | 40 | C:0.575                             | T:0.425          |
| chr28                   | 9143377 | 3 | 40 | AT:0.6                              | A:0.3 ATT:0.1    |
| chr28                   | 9143426 | 2 | 40 | CAGAGAGAG:0.775                     | C:0.225          |
| chr28                   | 9143525 | 2 | 38 | A:0.578947                          | G:0.421053       |
| chr28                   | 9143900 | 2 | 36 | TA:0.777778                         | T:0.222222       |
| chr28                   | 9144440 | 2 | 38 | G:0.526316                          | T:0.473684       |
| chr28                   | 9144446 | 2 | 38 | G:0.868421                          | A:0.131579       |
| chr28                   | 9144686 | 2 | 40 | A:0.9                               | T:0.1            |
| chr28                   | 9145028 | 2 | 40 | TGAAATATCTGGAAAAAAAAAAAAAAAAA:0.675 |                  |
| T:0.325                 |         |   |    |                                     |                  |
| chr28                   | 9145032 | 2 | 40 | ATATC:0.9                           | A:0.1            |
| chr28                   | 9145038 | 2 | 40 | GGAAAAAAAAAAAAAAAAAGAAATA:0.9       |                  |
| G:0.1                   |         |   |    |                                     |                  |
| chr28                   | 9145148 | 2 | 32 | CT:0.59375                          | C:0.40625        |
| chr28                   | 9145161 | 2 | 38 | T:0.526316                          | A:0.473684       |
| chr28                   | 9145164 | 4 | 40 | GATTTATTT:0.65                      | G:0.175 GATTT:   |
| 0.075 GATTTATTTATTT:0.1 |         |   |    |                                     |                  |
| chr28                   | 9145226 | 2 | 40 | T:0.95                              | TGAGA:0.05       |
| chr28                   | 9145643 | 2 | 40 | C:0.825                             | CAAGAT:0.175     |
| chr28                   | 9145790 | 2 | 38 | CTCT:0.868421                       | C:0.131579       |
| chr28                   | 9145810 | 2 | 38 | T:0.868421                          | A:0.131579       |
| chr28                   | 9145957 | 2 | 40 | CACG:0.7                            | C:0.3            |
| chr28                   | 9146538 | 2 | 40 | G:0.675                             | A:0.325          |
| chr28                   | 9146594 | 2 | 36 | ATC:0.722222                        | A:0.277778       |
| chr28                   | 9146977 | 2 | 34 | T:0.823529                          | A:0.176471       |
| chr28                   | 9147023 | 2 | 34 | G:1                                 | T:0              |
| chr28                   | 9147135 | 2 | 36 | TC:0.444444                         | T:0.555556       |
| chr28                   | 9147162 | 2 | 36 | T:0.777778                          | C:0.222222       |
| chr28                   | 9147164 | 2 | 36 | T:0.777778                          | C:0.222222       |
| chr28                   | 9147406 | 2 | 28 | A:0.821429                          | G:0.178571       |
| chr28                   | 9149465 | 2 | 36 | TA:0.527778                         | T:0.472222       |
| chr28                   | 9150836 | 2 | 36 | GT:0.777778                         | G:0.222222       |
| chr28                   | 9153248 | 2 | 40 | C:1                                 | T:0              |
| chr28                   | 9157090 | 2 | 40 | GT:0.8                              | G:0.2            |
| chr28                   | 9157133 | 2 | 40 | CAGAG:1                             | C:0              |
| chr28                   | 9158152 | 2 | 36 | AT:1                                | A:0              |
| chr28                   | 9158201 | 2 | 36 | GGA:0.833333                        | G:0.166667       |
| chr28                   | 9158997 | 2 | 38 | TA:0.921053                         | T:0.0789474      |
| chr28                   | 9159272 | 3 | 40 | AAG:0.775                           | A:0.175 AAGAGAG: |
| 0.05                    |         |   |    |                                     |                  |
| chr28                   | 9160165 | 2 | 40 | T:0.85                              | TA:0.15          |
| chr28                   | 9160327 | 2 | 36 | CTG:0.166667                        | C:0.833333       |
| chr28                   | 9160429 | 2 | 38 | C:0.631579                          | T:0.368421       |
| chr28                   | 9160757 | 2 | 38 | AC:1                                | A:0              |
| chr28                   | 9161374 | 2 | 38 | T:1                                 | A:0              |
| chr28                   | 9161866 | 2 | 40 | C:1                                 | T:0              |
| chr28                   | 9162302 | 2 | 38 | GGA:0.921053                        | G:0.0789474      |
| chr28                   | 9163197 | 2 | 40 | GA:0.05                             | G:0.95           |

|                               |         |   |    |                         |                |
|-------------------------------|---------|---|----|-------------------------|----------------|
| chr28                         | 9163247 | 2 | 40 | A:0.95                  | G:0.05         |
| chr28                         | 9164020 | 2 | 40 | C:1                     |                |
| CTTTGTTCTTCTTTTTTTTTTTTTTTT:0 |         |   |    |                         |                |
| chr28                         | 9164559 | 2 | 38 | G:1                     | GT:0           |
| chr28                         | 9164798 | 2 | 38 | TA:0.578947             | T:0.421053     |
| chr28                         | 9165080 | 3 | 38 | TA:0.763158             | T:0.157895     |
| AA:0.0789474                  |         |   |    |                         |                |
| chr28                         | 9165804 | 2 | 38 | T:0.657895              | C:0.342105     |
| chr28                         | 9166894 | 2 | 34 | C:0.852941              | CT:0.147059    |
| chr28                         | 9167364 | 2 | 32 | C:0.21875               | CT:0.78125     |
| chr28                         | 9167454 | 2 | 40 | C:1                     | T:0            |
| chr28                         | 9168441 | 2 | 36 | CAG:0.611111            | C:0.388889     |
| chr28                         | 9168549 | 2 | 34 | A:0.5                   | G:0.5          |
| chr28                         | 9169426 | 2 | 36 | A:1                     | G:0            |
| chr28                         | 9170031 | 2 | 36 | G:0.833333              | A:0.166667     |
| chr28                         | 9170724 | 2 | 38 | C:0.131579              | CAGAG:0.868421 |
| chr28                         | 9171159 | 2 | 40 | C:0.85                  | T:0.15         |
| chr28                         | 9175560 | 2 | 40 | T:0.725                 | C:0.275        |
| chr28                         | 9175795 | 2 | 34 | CT:0.823529             | C:0.176471     |
| chr28                         | 9178631 | 2 | 40 | T:1                     | C:0            |
| chr28                         | 9180681 | 2 | 36 | A:1                     | G:0            |
| chr28                         | 9180806 | 2 | 38 | C:0.631579              | T:0.368421     |
| chr28                         | 9180948 | 2 | 38 | T:1                     | G:0            |
| chr28                         | 9181107 | 2 | 40 | C:1                     | T:0            |
| chr28                         | 9181265 | 2 | 40 | C:1                     | T:0            |
| chr28                         | 9184306 | 3 | 34 | CAG:0.705882            | C:0.176471     |
| CAGAG:0.117647                |         |   |    |                         |                |
| chr28                         | 9187030 | 2 | 34 | CAAAT:0.441176          | C:0.558824     |
| chr28                         | 9187804 | 2 | 38 | G:0.763158              | A:0.236842     |
| chr28                         | 9188964 | 2 | 40 | T:0.575                 | C:0.425        |
| chr28                         | 9190252 | 2 | 34 | CT:0.735294             | C:0.264706     |
| chr28                         | 9190810 | 2 | 36 | G:1                     | A:0            |
| chr28                         | 9191746 | 2 | 40 | G:0                     | T:1            |
| chr28                         | 9194302 | 2 | 40 | C:1                     | T:0            |
| chr28                         | 9195381 | 2 | 40 | T:1                     | G:0            |
| chr28                         | 9195814 | 2 | 40 | G:1                     | A:0            |
| chr28                         | 9197247 | 2 | 40 | G:1                     | A:0            |
| chr28                         | 9200444 | 2 | 40 | G:0.65                  | A:0.35         |
| chr28                         | 9200919 | 2 | 34 | CT:0.852941             | C:0.147059     |
| chr28                         | 9202338 | 2 | 38 | C:0.921053              | T:0.0789474    |
| chr28                         | 9202393 | 2 | 36 | AT:0.472222             | A:0.527778     |
| chr28                         | 9203008 | 4 | 40 | CTTCTTTCT:0.425         | C:0.075        |
| CTTCTTTCTTTCT:0.1             |         |   |    |                         |                |
| chr28                         | 9203378 | 2 | 38 | GT:0.763158             | G:0.236842     |
| chr28                         | 9204202 | 2 | 40 | GAC:0.775               | G:0.225        |
| chr28                         | 9205805 | 2 | 38 | CTTCTTCTTCTTCT:0.736842 | C:             |
| 0.263158                      |         |   |    |                         |                |
| chr28                         | 9205814 | 2 | 38 | CTTCTCT:1               | C:0            |
| chr28                         | 9208416 | 2 | 40 | T:1                     | A:0            |
| chr28                         | 9208559 | 2 | 38 | C:1                     | T:0            |
| chr28                         | 9208833 | 2 | 38 | C:0.894737              | T:0.105263     |
| chr28                         | 9210336 | 2 | 36 | C:1                     | T:0            |
| chr28                         | 9211793 | 2 | 32 | AC:0                    | A:1            |
| chr28                         | 9214201 | 2 | 36 | G:1                     | A:0            |

|                                |         |   |    |                   |              |                 |          |
|--------------------------------|---------|---|----|-------------------|--------------|-----------------|----------|
| chr28                          | 9218725 | 2 | 40 | C:1               | T:0          |                 |          |
| chr28                          | 9220104 | 2 | 38 | A:0.973684        |              | AATTC:0.0263158 |          |
| chr28                          | 9221330 | 2 | 36 | T:0.166667        |              | C:0.833333      |          |
| chr28                          | 9222795 | 2 | 38 | C:1               | T:0          |                 |          |
| chr28                          | 9224068 | 2 | 40 | G:0.1             | A:0.9        |                 |          |
| chr28                          | 9224369 | 2 | 38 | A:0.921053        |              | G:0.0789474     |          |
| chr28                          | 9225820 | 2 | 36 | C:0.833333        |              | G:0.166667      |          |
| chr28                          | 9225982 | 2 | 38 | T:1               | G:0          |                 |          |
| chr28                          | 9226256 | 2 | 40 | TCAA:0.85         |              | T:0.15          |          |
| chr28                          | 9226379 | 2 | 40 | G:0.875           | A:0.125      |                 |          |
| chr28                          | 9226462 | 2 | 36 | C:1               | T:0          |                 |          |
| chr28                          | 9229209 | 2 | 40 | C:1               | T:0          |                 |          |
| chr28                          | 9231342 | 3 | 38 | C:0.315789        |              | CT:0.210526     |          |
| CTT:0.473684                   |         |   |    |                   |              |                 |          |
| chr28                          | 9234080 | 2 | 38 | C:1               | T:0          |                 |          |
| chr28                          | 9235371 | 2 | 36 | G:0.888889        |              | A:0.111111      |          |
| chr28                          | 9235627 | 2 | 40 | G:1               | C:0          |                 |          |
| chr28                          | 9236536 | 3 | 34 | T:0.5             | TTG:0.264706 | TTGTG:          |          |
| 0.235294                       |         |   |    |                   |              |                 |          |
| chr28                          | 9241046 | 2 | 34 | T:0.852941        |              | TAC:0.147059    |          |
| chr28                          | 9241915 | 2 | 40 | G:0.9             | T:0.1        |                 |          |
| chr28                          | 9242810 | 2 | 38 | C:1               | T:0          |                 |          |
| chr28                          | 9245246 | 2 | 38 | G:1               | A:0          |                 |          |
| chr28                          | 9245562 | 2 | 40 | C:1               | CAG:0        |                 |          |
| chr28                          | 9245594 | 2 | 40 | GAAACATAGGC:0.9   |              | G:0.1           |          |
| chr28                          | 9245609 | 2 | 40 | G:0.9             | A:0.1        |                 |          |
| chr28                          | 9246068 | 3 | 30 | CT:0.533333       |              | C:0.333333      |          |
| CTT:0.133333                   |         |   |    |                   |              |                 |          |
| chr28                          | 9249971 | 2 | 32 | GA:0.8125         |              | G:0.1875        |          |
| chr28                          | 9252355 | 2 | 40 | G:0.65            | GC:0.35      |                 |          |
| chr28                          | 9255857 | 2 | 38 | A:0.921053        |              | G:0.0789474     |          |
| chr28                          | 9256832 | 2 | 40 | T:0.975           | C:0.025      |                 |          |
| chr28                          | 9258279 | 2 | 38 | T:1               | TTTTTC:0     |                 |          |
| chr28                          | 9260451 | 2 | 38 | TA:0.631579       |              | T:0.368421      |          |
| chr28                          | 9262984 | 2 | 26 | C:1               | A:0          |                 |          |
| chr28                          | 9263081 | 2 | 34 | T:1               | A:0          |                 |          |
| chr28                          | 9263695 | 2 | 38 | C:0               | A:1          |                 |          |
| chr28                          | 9266238 | 4 | 40 | TAAATAAAATA:0.375 |              | T:0.275         |          |
| TAAATA:0 TAAATAAAATAAAATA:0.35 |         |   |    |                   |              |                 |          |
| chr28                          | 9266559 | 2 | 40 | C:1               | T:0          |                 |          |
| chr28                          | 9268562 | 3 | 36 | T:0.833333        |              | TCA:0.0833333   |          |
| TCACA:0.0833333                |         |   |    |                   |              |                 |          |
| chr28                          | 9270413 | 2 | 40 | T:0.8             | TA:0.2       |                 |          |
| chr28                          | 9270532 | 2 | 40 | C:0.925           | G:0.075      |                 |          |
| chr28                          | 9271166 | 3 | 40 | AAG:0.775         |              | A:0.225         | AAGAGAG: |
| 0                              |         |   |    |                   |              |                 |          |
| chr28                          | 9274164 | 2 | 40 | A:0.85            | T:0.15       |                 |          |
| chr28                          | 9274623 | 2 | 38 | G:1               | A:0          |                 |          |
| chr28                          | 9274782 | 3 | 38 | TTTTA:0.736842    |              | T:0.105263      |          |
| TTTTATTTA:0.157895             |         |   |    |                   |              |                 |          |
| chr28                          | 9276305 | 2 | 36 | G:1               | A:0          |                 |          |
| chr28                          | 9279792 | 3 | 40 | TTCTCTCTCTC:0.35  |              | T:0.175         |          |
| TTCTCTC:0.475                  |         |   |    |                   |              |                 |          |
| chr28                          | 9279868 | 2 | 38 | A:0.789474        |              | T:0.210526      |          |

|               |         |   |    |                      |                 |
|---------------|---------|---|----|----------------------|-----------------|
| chr28         | 9279890 | 2 | 38 | T:0.131579           | TA:0.868421     |
| chr28         | 9282265 | 2 | 38 | C:1 T:0              |                 |
| chr28         | 9286422 | 2 | 40 | A:0.95 G:0.05        |                 |
| chr28         | 9289479 | 2 | 38 | G:0 GT:1             |                 |
| chr28         | 9289501 | 2 | 38 | AG:0 A:1             |                 |
| chr28         | 9289508 | 2 | 38 | C:0 CA:1             |                 |
| chr28         | 9289522 | 2 | 40 | CT:0 C:1             |                 |
| chr28         | 9289527 | 2 | 40 | C:0 CA:1             |                 |
| chr28         | 9289532 | 2 | 40 | AT:0 A:1             |                 |
| chr28         | 9289540 | 2 | 40 | A:0 AC:1             |                 |
| chr28         | 9289550 | 2 | 40 | G:0 C:1              |                 |
| chr28         | 9289551 | 2 | 40 | C:0 T:1              |                 |
| chr28         | 9289563 | 2 | 38 | A:0 AT:1             |                 |
| chr28         | 9289582 | 2 | 40 | T:0 TTG:1            |                 |
| chr28         | 9289586 | 2 | 40 | A:0 AG:1             |                 |
| chr28         | 9289594 | 2 | 40 | A:0 AT:1             |                 |
| chr28         | 9289602 | 2 | 40 | C:0 CT:1             |                 |
| chr28         | 9289611 | 2 | 40 | C:0 CT:1             |                 |
| chr28         | 9289613 | 2 | 40 | A:0 T:1              |                 |
| chr28         | 9289628 | 2 | 38 | T:0 C:1              |                 |
| chr28         | 9289678 | 2 | 38 | G:0 GA:1             |                 |
| chr28         | 9289765 | 3 | 36 | GT:0.638889          | G:0.194444      |
| GTT:0.166667  |         |   |    |                      |                 |
| chr28         | 9291028 | 2 | 38 | G:0.842105           | GA:0.157895     |
| chr28         | 9292480 | 2 | 36 | A:1 G:0              |                 |
| chr28         | 9292702 | 2 | 36 | A:0.638889           | AT:0.361111     |
| chr28         | 9293543 | 2 | 36 | A:1 T:0              |                 |
| chr28         | 9294590 | 2 | 38 | CT:0.815789          | C:0.184211      |
| chr28         | 9295280 | 2 | 36 | C:0.972222           | CTGTG:0.0277778 |
| chr28         | 9296459 | 2 | 36 | C:0.111111           | A:0.888889      |
| chr28         | 9297124 | 2 | 40 | TG:0 T:1             |                 |
| chr28         | 9297705 | 2 | 38 | CT:0.736842          | C:0.263158      |
| chr28         | 9297733 | 2 | 38 | T:0.763158           | A:0.236842      |
| chr28         | 9297746 | 2 | 34 | T:0.647059           | G:0.352941      |
| chr28         | 9299280 | 2 | 34 | T:0.823529           | TA:0.176471     |
| chr28         | 9302028 | 2 | 34 | G:1 A:0              |                 |
| chr28         | 9303306 | 2 | 38 | C:1 T:0              |                 |
| chr28         | 9307062 | 3 | 36 | TA:0.555556          | T:0.25 TAA:     |
| 0.194444      |         |   |    |                      |                 |
| chr28         | 9307815 | 2 | 36 | C:1 T:0              |                 |
| chr28         | 9310023 | 3 | 38 | TA:0.868421          | T:0.105263      |
| TAA:0.0263158 |         |   |    |                      |                 |
| chr28         | 9310572 | 2 | 36 | G:0.833333           | A:0.166667      |
| chr28         | 9313118 | 2 | 38 | C:1 T:0              |                 |
| chr28         | 9313791 | 2 | 36 | TA:0.916667          | T:0.0833333     |
| chr28         | 9314189 | 2 | 40 | A:1 T:0              |                 |
| chr28         | 9314438 | 2 | 36 | CATATATATAT:0.416667 | C:              |
| 0.583333      |         |   |    |                      |                 |
| chr28         | 9315188 | 2 | 38 | AC:0.815789          | A:0.184211      |
| chr28         | 9315208 | 2 | 36 | A:1 G:0              |                 |
| chr28         | 9318528 | 2 | 26 | TA:0.961538          | T:0.0384615     |
| chr28         | 9320292 | 2 | 40 | G:1 A:0              |                 |
| chr28         | 9320305 | 2 | 38 | TG:1 T:0             |                 |
| chr28         | 9320833 | 2 | 28 | G:1 GCA:0            |                 |



|                                |         |   |    |                    |          |            |  |
|--------------------------------|---------|---|----|--------------------|----------|------------|--|
| chr28                          | 9322001 | 2 | 38 | A:1                | G:0      |            |  |
| chr28                          | 9323951 | 2 | 36 | G:0                | A:1      |            |  |
| chr28                          | 9325691 | 2 | 40 | A:1                | G:0      |            |  |
| chr28                          | 9326224 | 2 | 40 | C:0.525            | T:0.475  |            |  |
| chr28                          | 9330049 | 2 | 36 | CCT:1              | C:0      |            |  |
| chr28                          | 9330093 | 2 | 38 | TA:0.868421        |          | T:0.131579 |  |
| chr28                          | 9338162 | 2 | 38 | CT:0.578947        |          | C:0.421053 |  |
| chr28                          | 9338671 | 2 | 40 | T:0.6              | C:0.4    |            |  |
| chr28                          | 9339342 | 2 | 40 | T:0                | C:1      |            |  |
| chr28                          | 9340687 | 2 | 38 | A:0.815789         |          | C:0.184211 |  |
| chr28                          | 9342346 | 2 | 40 | CAGAG:1            | C:0      |            |  |
| chr28                          | 9342381 | 2 | 38 | G:1                | A:0      |            |  |
| chr28                          | 9344449 | 2 | 40 | T:0.7              | G:0.3    |            |  |
| chr28                          | 9346223 | 2 | 40 | C:1                | CAATA:0  |            |  |
| chr28                          | 9346437 | 2 | 40 | GA:0.7             | G:0.3    |            |  |
| chr28                          | 9347895 | 3 | 36 | T:0.138889         |          | TTTTA:0.75 |  |
| TTTTATTTA:0.111111             |         |   |    |                    |          |            |  |
| chr28                          | 9349792 | 2 | 38 | T:1                | C:0      |            |  |
| chr28                          | 9350405 | 2 | 36 | A:1                | G:0      |            |  |
| chr28                          | 9351340 | 4 | 38 | TATAAATAA:0.236842 |          | T:0.5      |  |
| TATAA:0 TATAAATAAATAA:0.263158 |         |   |    |                    |          |            |  |
| chr28                          | 9352037 | 2 | 40 | G:0.85             | C:0.15   |            |  |
| chr28                          | 9355014 | 2 | 38 | CCT:0.894737       |          | C:0.105263 |  |
| chr28                          | 9356156 | 2 | 34 | TA:0.764706        |          | T:0.235294 |  |
| chr28                          | 9356483 | 2 | 36 | CT:0.833333        |          | C:0.166667 |  |
| chr28                          | 9357139 | 3 | 38 | AT:0.447368        |          | A:0.368421 |  |
| ATT:0.184211                   |         |   |    |                    |          |            |  |
| chr28                          | 9357371 | 2 | 40 | C:0                | A:1      |            |  |
| chr28                          | 9357778 | 2 | 38 | T:1                | TA:0     |            |  |
| chr28                          | 9359170 | 2 | 40 | A:1                | T:0      |            |  |
| chr28                          | 9359227 | 2 | 40 | GGCAGAGGGAGAA:0.95 |          | G:0.05     |  |
| chr28                          | 9359764 | 2 | 36 | TA:0.861111        |          | T:0.138889 |  |
| chr28                          | 9360813 | 2 | 38 | C:1                | T:0      |            |  |
| chr28                          | 9361289 | 2 | 36 | T:0                | C:1      |            |  |
| chr28                          | 9361760 | 2 | 36 | CTG:0.888889       |          | C:0.111111 |  |
| chr28                          | 9361762 | 2 | 36 | G:0.861111         |          | C:0.138889 |  |
| chr28                          | 9362169 | 2 | 38 | G:1                | A:0      |            |  |
| chr28                          | 9363389 | 2 | 40 | T:1                | G:0      |            |  |
| chr28                          | 9363703 | 2 | 40 | AAAAGAAAG:0.925    | A:0.075  |            |  |
| chr28                          | 9363721 | 3 | 40 | AAGAAAGAAAAAG:0.75 |          | A:0.05     |  |
| AAAAGAAAAAG:0.2                |         |   |    |                    |          |            |  |
| chr28                          | 9363727 | 2 | 40 | GAA:1              | G:0      |            |  |
| chr28                          | 9363729 | 2 | 40 | A:0.65             | AAG:0.35 |            |  |
| chr28                          | 9364175 | 2 | 40 | T:0.55             | C:0.45   |            |  |
| chr28                          | 9364724 | 2 | 38 | G:1                | A:0      |            |  |
| chr28                          | 9365482 | 2 | 40 | CAA:1              | C:0      |            |  |
| chr28                          | 9365955 | 2 | 40 | C:0                | T:1      |            |  |
| chr28                          | 9366573 | 2 | 34 | T:1                | A:0      |            |  |
| chr28                          | 9367828 | 2 | 40 | A:0                | T:1      |            |  |
| chr28                          | 9367875 | 2 | 36 | TA:0.777778        |          | T:0.222222 |  |
| chr28                          | 9367881 | 2 | 36 | G:0.777778         |          | C:0.222222 |  |
| chr28                          | 9368763 | 2 | 30 | TA:0.9             | T:0.1    |            |  |
| chr28                          | 9370512 | 2 | 38 | A:0.842105         |          | G:0.157895 |  |
| chr28                          | 9371129 | 2 | 26 | G:0.153846         |          | C:0.846154 |  |

|       |         |   |    |                              |               |
|-------|---------|---|----|------------------------------|---------------|
| chr28 | 9371139 | 2 | 26 | TCCGCGCCGCCCGCGCCGC:0.192308 |               |
|       |         |   |    | T:0.807692                   |               |
| chr28 | 9371311 | 2 | 32 | C:0.34375                    | G:0.65625     |
| chr28 | 9371383 | 2 | 36 | G:0.0277778                  | T:0.972222    |
| chr28 | 9371461 | 2 | 34 | C:0.882353                   | G:0.117647    |
| chr28 | 9372170 | 2 | 40 | A:1                          | G:0           |
| chr28 | 9372185 | 2 | 40 | A:1                          | G:0           |
| chr28 | 9372781 | 2 | 38 | CT:0.710526                  | C:0.289474    |
| chr28 | 9374018 | 2 | 38 | G:0.894737                   | C:0.105263    |
| chr28 | 9374197 | 2 | 34 | T:1                          | C:0           |
| chr28 | 9374225 | 2 | 36 | T:0.972222                   | TTC:0.0277778 |
| chr28 | 9374408 | 2 | 36 | C:1                          | T:0           |
| chr28 | 9375292 | 2 | 36 | A:0                          | C:1           |
| chr28 | 9375559 | 2 | 34 | C:1                          | CCTCT:0       |
| chr28 | 9376063 | 2 | 40 | A:0.825                      | T:0.175       |
| chr28 | 9376620 | 2 | 38 | A:0.973684                   | T:0.0263158   |
| chr28 | 9376724 | 2 | 40 | A:0.95                       | G:0.05        |
| chr28 | 9377246 | 2 | 38 | TCA:1                        | T:0           |
| chr28 | 9377362 | 2 | 40 | T:0.95                       | A:0.05        |
| chr28 | 9377406 | 2 | 40 | G:0.975                      | A:0.025       |
| chr28 | 9378066 | 2 | 40 | TA:0.875                     | T:0.125       |
| chr28 | 9378352 | 2 | 40 | T:0.95                       | C:0.05        |
| chr28 | 9379155 | 2 | 38 | CT:0.842105                  | C:0.157895    |
| chr28 | 9379714 | 2 | 40 | AT:0.675                     | A:0.325       |
| chr28 | 9379904 | 2 | 36 | G:0.972222                   | A:0.0277778   |
| chr28 | 9379915 | 2 | 38 | G:0.921053                   | A:0.0789474   |
| chr28 | 9381902 | 2 | 40 | G:0.975                      | A:0.025       |
| chr28 | 9382377 | 2 | 34 | C:0.941176                   | T:0.0588235   |
| chr28 | 9382570 | 2 | 40 | T:0.95                       | C:0.05        |
| chr28 | 9382869 | 2 | 40 | A:0.95                       | G:0.05        |
| chr28 | 9383106 | 2 | 40 | T:0.95                       | C:0.05        |
| chr28 | 9383420 | 2 | 38 | G:0.947368                   | T:0.0526316   |
| chr28 | 9383516 | 2 | 38 | G:0.947368                   | A:0.0526316   |
| chr28 | 9383681 | 2 | 38 | G:0.868421                   | A:0.131579    |
| chr28 | 9384144 | 2 | 40 | G:0.9                        | T:0.1         |
| chr28 | 9384153 | 2 | 40 | T:0.9                        | C:0.1         |
| chr28 | 9384469 | 2 | 40 | C:0.9                        | CT:0.1        |
| chr28 | 9384854 | 2 | 38 | C:0.921053                   | G:0.0789474   |
| chr28 | 9384896 | 2 | 40 | CT:0.975                     | C:0.025       |
| chr28 | 9385165 | 2 | 36 | A:0.972222                   | G:0.0277778   |
| chr28 | 9385324 | 2 | 38 | TG:0.947368                  | T:0.0526316   |
| chr28 | 9385492 | 2 | 38 | G:0.947368                   | GT:0.0526316  |
| chr28 | 9385817 | 2 | 40 | TAA:0.975                    | T:0.025       |
| chr28 | 9385948 | 2 | 40 | A:0.95                       | G:0.05        |
| chr28 | 9386281 | 2 | 34 | AGCT:0.911765                | A:0.0882353   |
| chr28 | 9386287 | 2 | 34 | T:0.911765                   | A:0.0882353   |
| chr28 | 9387287 | 2 | 38 | C:0.973684                   | T:0.0263158   |
| chr28 | 9387331 | 2 | 38 | C:0.921053                   | T:0.0789474   |
| chr28 | 9387708 | 2 | 38 | A:0.921053                   | T:0.0789474   |
| chr28 | 9387720 | 2 | 38 | A:0.921053                   | T:0.0789474   |
| chr28 | 9387722 | 2 | 38 | T:0.921053                   | TC:0.0789474  |
| chr28 | 9388020 | 2 | 36 | T:0.944444                   | A:0.0555556   |
| chr28 | 9388110 | 2 | 38 | C:0.947368                   | T:0.0526316   |
| chr28 | 9388356 | 2 | 40 | C:0.925                      | A:0.075       |

|       |         |   |    |                         |           |                       |
|-------|---------|---|----|-------------------------|-----------|-----------------------|
| chr28 | 9388423 | 2 | 40 | T:0.95                  | A:0.05    |                       |
| chr28 | 9388498 | 2 | 38 | AT:0.947368             |           | A:0.0526316           |
| chr28 | 9388688 | 2 | 38 | G:0.947368              |           | A:0.0526316           |
| chr28 | 9388702 | 2 | 38 | A:0.947368              |           | G:0.0526316           |
| chr28 | 9388808 | 2 | 40 | CTTCTG:0.975            |           | C:0.025               |
| chr28 | 9388923 | 2 | 40 | G:1                     | A:0       |                       |
| chr28 | 9389027 | 2 | 36 | C:0.944444              |           | T:0.0555556           |
| chr28 | 9389031 | 2 | 36 | A:0.944444              |           | G:0.0555556           |
| chr28 | 9389127 | 2 | 40 | T:1                     | G:0       |                       |
| chr28 | 9389456 | 2 | 38 | TA:0.815789             |           | T:0.184211            |
| chr28 | 9389930 | 2 | 40 | G:0.95                  | A:0.05    |                       |
| chr28 | 9390113 | 2 | 38 | C:0.973684              |           | G:0.0263158           |
| chr28 | 9390141 | 2 | 40 | GTCTCTGCCTCTCTCTC:0.425 |           | G:0.575               |
| chr28 | 9390148 | 2 | 40 | C:0.875                 | CCT:0.125 |                       |
| chr28 | 9390206 | 2 | 38 | AT:0.947368             |           | A:0.0526316           |
| chr28 | 9390620 | 3 | 40 | CTTT:0.125              |           | C:0.1 CTTTT:<br>0.775 |
| chr28 | 9390863 | 2 | 40 | G:1                     | A:0       |                       |
| chr28 | 9390877 | 2 | 40 | A:0.95                  | G:0.05    |                       |
| chr28 | 9391347 | 2 | 40 | G:0.95                  | T:0.05    |                       |
| chr28 | 9391436 | 2 | 38 | A:0.947368              |           | G:0.0526316           |
| chr28 | 9391460 | 2 | 36 | C:1                     | A:0       |                       |
| chr28 | 9391949 | 2 | 36 | TAA:0.777778            |           | T:0.222222            |
| chr28 | 9392036 | 2 | 38 | T:0.947368              |           | C:0.0526316           |
| chr28 | 9392240 | 2 | 40 | T:0.95                  | C:0.05    |                       |
| chr28 | 9392571 | 2 | 40 | G:0.95                  | A:0.05    |                       |
| chr28 | 9392725 | 2 | 40 | A:0.95                  | G:0.05    |                       |
| chr28 | 9392832 | 2 | 40 | G:0.95                  | T:0.05    |                       |
| chr28 | 9393098 | 2 | 38 | CGTTT:0.947368          |           | C:0.0526316           |
| chr28 | 9393371 | 2 | 40 | G:0.95                  | A:0.05    |                       |
| chr28 | 9393865 | 2 | 34 | A:0.941176              |           | AAT:0.0588235         |
| chr28 | 9393906 | 2 | 36 | A:0.916667              |           | AC:0.0833333          |
| chr28 | 9394201 | 2 | 34 | C:0.911765              |           | T:0.0882353           |
| chr28 | 9394334 | 2 | 36 | T:0.916667              |           | TA:0.0833333          |
| chr28 | 9394397 | 2 | 40 | C:0.95                  | CT:0.05   |                       |
| chr28 | 9394399 | 2 | 40 | GCCCAGTTAA:0.95         |           | G:0.05                |
| chr28 | 9394573 | 2 | 36 | G:1                     | A:0       |                       |
| chr28 | 9394893 | 2 | 38 | C:0.894737              |           | G:0.105263            |
| chr28 | 9394988 | 2 | 34 | C:0.852941              |           | CT:0.147059           |
| chr28 | 9395160 | 2 | 38 | T:0.921053              |           | A:0.0789474           |
| chr28 | 9395301 | 2 | 40 | G:0.95                  | T:0.05    |                       |
| chr28 | 9395358 | 2 | 40 | G:0.8                   | T:0.2     |                       |
| chr28 | 9397180 | 2 | 32 | TA:0.9375               |           | T:0.0625              |
| chr28 | 9397221 | 2 | 38 | T:0.947368              |           | TG:0.0526316          |
| chr28 | 9397328 | 2 | 40 | C:0.975                 | A:0.025   |                       |
| chr28 | 9397335 | 2 | 40 | T:0.975                 | A:0.025   |                       |
| chr28 | 9397356 | 2 | 36 | CT:0.972222             |           | C:0.0277778           |
| chr28 | 9397587 | 2 | 38 | C:0.947368              |           | T:0.0526316           |
| chr28 | 9397666 | 2 | 40 | A:1                     | T:0       |                       |
| chr28 | 9398030 | 2 | 40 | A:0.975                 | G:0.025   |                       |
| chr28 | 9398401 | 2 | 40 | TA:0.95                 | T:0.05    |                       |
| chr28 | 9398419 | 2 | 40 | T:0.95                  | TA:0.05   |                       |
| chr28 | 9398455 | 2 | 40 | T:0.95                  | G:0.05    |                       |
| chr28 | 9398642 | 2 | 40 | A:0.975                 | T:0.025   |                       |

|                  |         |   |    |              |                   |              |
|------------------|---------|---|----|--------------|-------------------|--------------|
| chr28            | 9398643 | 2 | 40 | A:0.975      | C:0.025           |              |
| chr28            | 9398660 | 2 | 40 | A:0.975      | G:0.025           |              |
| chr28            | 9398733 | 2 | 38 | C:0.947368   |                   | T:0.0526316  |
| chr28            | 9399036 | 2 | 34 | G:0.970588   |                   | A:0.0294118  |
| chr28            | 9399350 | 2 | 40 | CCT:0.375    |                   | C:0.625      |
| chr28            | 9399378 | 2 | 40 | AAATT:1      | A:0               |              |
| chr28            | 9399604 | 2 | 38 | T:0.947368   |                   | C:0.0526316  |
| chr28            | 9399605 | 2 | 38 | G:0.947368   |                   | A:0.0526316  |
| chr28            | 9399623 | 2 | 38 | G:0.947368   |                   | C:0.0526316  |
| chr28            | 9399641 | 2 | 38 | T:0.947368   |                   | C:0.0526316  |
| chr28            | 9399673 | 2 | 36 | G:0.944444   |                   | A:0.0555556  |
| chr28            | 9399755 | 3 | 36 | TA:0.75      | T:0.111111        | TAA:         |
| 0.138889         |         |   |    |              |                   |              |
| chr28            | 9399791 | 2 | 40 | A:0.95       | C:0.05            |              |
| chr28            | 9399927 | 2 | 40 | A:0.95       | C:0.05            |              |
| chr28            | 9400413 | 2 | 38 | C:0.947368   |                   | T:0.0526316  |
| chr28            | 9400472 | 2 | 40 | T:0.925      | TG:0.075          |              |
| chr28            | 9400654 | 2 | 38 | G:0.973684   |                   | A:0.0263158  |
| chr28            | 9400813 | 2 | 38 | GA:0.947368  |                   | G:0.0526316  |
| chr28            | 9400892 | 2 | 36 | C:0.944444   |                   | T:0.0555556  |
| chr28            | 9401088 | 2 | 40 | C:0.95       | A:0.05            |              |
| chr28            | 9401781 | 2 | 40 | A:0.975      | ATGTGTGTGTG:0.025 |              |
| chr28            | 9401846 | 2 | 38 | G:0.947368   |                   | A:0.0526316  |
| chr28            | 9401855 | 2 | 36 | G:0.916667   |                   | A:0.0833333  |
| chr28            | 9402130 | 2 | 36 | A:0.888889   |                   | AT:0.111111  |
| chr28            | 9402175 | 3 | 36 | CT:0.305556  |                   | C:0.583333   |
| CTT:0.111111     |         |   |    |              |                   |              |
| chr28            | 9402275 | 2 | 38 | T:0.947368   |                   | C:0.0526316  |
| chr28            | 9402316 | 2 | 38 | T:0.947368   |                   | C:0.0526316  |
| chr28            | 9402515 | 3 | 36 | ATC:0.833333 |                   | A:0.111111   |
| ATTCTC:0.0555556 |         |   |    |              |                   |              |
| chr28            | 9402517 | 2 | 36 | C:1          | T:0               |              |
| chr28            | 9403020 | 2 | 36 | A:0.944444   |                   | AT:0.0555556 |
| chr28            | 9403055 | 2 | 36 | AAC:0.944444 |                   | A:0.0555556  |
| chr28            | 9403414 | 2 | 38 | T:0.947368   |                   | C:0.0526316  |
| chr28            | 9403486 | 2 | 38 | T:0.947368   |                   | C:0.0526316  |
| chr28            | 9403716 | 2 | 38 | A:0.947368   |                   | G:0.0526316  |
| chr28            | 9403888 | 2 | 38 | C:0.815789   |                   | T:0.184211   |
| chr28            | 9403982 | 2 | 40 | G:0.95       | C:0.05            |              |
| chr28            | 9404223 | 2 | 38 | AAT:0.578947 |                   | A:0.421053   |
| chr28            | 9404561 | 2 | 38 | G:0.947368   |                   | A:0.0526316  |
| chr28            | 9404634 | 2 | 38 | C:0.947368   |                   | T:0.0526316  |
| chr28            | 9404838 | 2 | 38 | T:0.947368   |                   | C:0.0526316  |
| chr28            | 9404885 | 2 | 40 | T:0.95       | G:0.05            |              |
| chr28            | 9405333 | 2 | 40 | A:0.975      | G:0.025           |              |
| chr28            | 9405405 | 2 | 36 | C:0.944444   |                   | A:0.0555556  |
| chr28            | 9405444 | 2 | 40 | G:0.95       | T:0.05            |              |
| chr28            | 9405823 | 2 | 40 | A:0.925      | G:0.075           |              |
| chr28            | 9405940 | 2 | 40 | G:0.975      | GA:0.025          |              |
| chr28            | 9406050 | 2 | 36 | CT:0.916667  |                   | C:0.0833333  |
| chr28            | 9406264 | 2 | 38 | G:0.973684   |                   | A:0.0263158  |
| chr28            | 9406371 | 2 | 40 | C:0.975      | G:0.025           |              |
| chr28            | 9406496 | 2 | 40 | T:0.925      | G:0.075           |              |
| chr28            | 9406604 | 2 | 38 | A:0.947368   |                   | G:0.0526316  |

|                 |         |                     |    |                         |                 |
|-----------------|---------|---------------------|----|-------------------------|-----------------|
| chr28           | 9406877 | 2                   | 36 | C:0.944444              | T:0.0555556     |
| chr28           | 9406943 | 2                   | 38 | G:0.947368              | A:0.0526316     |
| chr28           | 9407001 | 2                   | 38 | GTC:0.921053            | G:0.0789474     |
| chr28           | 9407048 | 2                   | 38 | TA:0.921053             | T:0.0789474     |
| chr28           | 9407144 | 2                   | 38 | G:0.921053              | A:0.0789474     |
| chr28           | 9407251 | 2                   | 36 | G:0.944444              | A:0.0555556     |
| chr28           | 9407317 | 2                   | 40 | CT:0.9 C:0.1            |                 |
| chr28           | 9407363 | 2                   | 38 | C:0.921053              | CAGAG:0.0789474 |
| chr28           | 9407435 | 2                   | 38 | T:0.921053              | C:0.0789474     |
| chr28           | 9407708 | 2                   | 40 | A:0.975 G:0.025         |                 |
| chr28           | 9408117 | 2                   | 38 | A:0.947368              | G:0.0526316     |
| chr28           | 9408844 | 2                   | 32 | T:0.9375 C:0.0625       |                 |
| chr28           | 9409094 | 5                   | 40 | TATAA:0.325             | T:0.225         |
| TATAAATAA:0.325 |         | TATAAATAAATAA:0.125 |    | TATAAATAAATAAATAA:0     |                 |
| chr28           | 9409136 | 2                   | 40 | T:0.925 TAAATAAAA:0.075 |                 |
| chr28           | 9409832 | 2                   | 38 | A:0.947368              | G:0.0526316     |
| chr28           | 9412296 | 2                   | 38 | G:0.947368              | A:0.0526316     |
| chr28           | 9412365 | 2                   | 40 | C:0.95 T:0.05           |                 |
| chr28           | 9412764 | 2                   | 40 | T:0.925 A:0.075         |                 |
| chr28           | 9413209 | 2                   | 36 | C:0.972222              | CCT:0.0277778   |
| chr28           | 9414925 | 2                   | 40 | TA:0.9 T:0.1            |                 |
| chr28           | 9414938 | 2                   | 40 | TTAA:0.975              | T:0.025         |
| chr28           | 9414939 | 2                   | 38 | TA:0.0526316            | T:0.947368      |
| chr28           | 9414983 | 2                   | 40 | A:0 G:1                 |                 |
| chr28           | 9415014 | 2                   | 40 | A:0 G:1                 |                 |
| chr28           | 9415036 | 2                   | 40 | A:0 G:1                 |                 |
| chr28           | 9415125 | 2                   | 34 | A:0 C:1                 |                 |
| chr28           | 9415544 | 2                   | 38 | T:0.947368              | G:0.0526316     |
| chr28           | 9416238 | 2                   | 40 | C:0.45 CA:0.55          |                 |
| chr28           | 9416347 | 2                   | 40 | C:0.45 CA:0.55          |                 |
| chr28           | 9416349 | 2                   | 40 | C:0.45 CA:0.55          |                 |
| chr28           | 9416351 | 2                   | 40 | G:0.45 GA:0.55          |                 |
| chr28           | 9416355 | 2                   | 40 | C:0.45 CT:0.55          |                 |
| chr28           | 9417023 | 2                   | 40 | GTTA:1 G:0              |                 |
| chr28           | 9417266 | 2                   | 40 | G:0.975 A:0.025         |                 |
| chr28           | 9417400 | 2                   | 40 | C:0.95 T:0.05           |                 |
| chr28           | 9417497 | 2                   | 40 | C:0.975 G:0.025         |                 |
| chr28           | 9418472 | 2                   | 38 | A:0.947368              | T:0.0526316     |
| chr28           | 9418536 | 2                   | 38 | A:0.947368              | G:0.0526316     |
| chr28           | 9419145 | 2                   | 38 | T:0.973684              | C:0.0263158     |
| chr28           | 9419440 | 3                   | 36 | CATATAT:0.527778        | C:0.0833333     |
| CATAT:0.388889  |         |                     |    |                         |                 |
| chr28           | 9420740 | 2                   | 40 | T:0.9 A:0.1             |                 |
| chr28           | 9422117 | 3                   | 38 | TAA:0.0526316           | T:0.131579      |
| TA:0.815789     |         |                     |    |                         |                 |
| chr28           | 9422780 | 2                   | 40 | GTTTGTT:0.95            | G:0.05          |
| chr28           | 9423180 | 2                   | 38 | T:0.947368              | A:0.0526316     |
| chr28           | 9423467 | 2                   | 38 | A:0.973684              | G:0.0263158     |
| chr28           | 9423648 | 2                   | 40 | C:0.95 T:0.05           |                 |
| chr28           | 9423833 | 2                   | 38 | C:1 CT:0                |                 |
| chr28           | 9423839 | 2                   | 36 | T:1 TG:0                |                 |
| chr28           | 9423840 | 2                   | 38 | G:0.789474              | T:0.210526      |
| chr28           | 9425194 | 2                   | 38 | T:0.947368              | G:0.0526316     |
| chr28           | 9425684 | 2                   | 40 | C:0.95 T:0.05           |                 |

|                                         |         |   |    |                |                           |             |
|-----------------------------------------|---------|---|----|----------------|---------------------------|-------------|
| chr28                                   | 9425738 | 2 | 40 | C:0.95         | A:0.05                    |             |
| chr28                                   | 9425879 | 2 | 40 | TA:0.975       | T:0.025                   |             |
| chr28                                   | 9425882 | 2 | 40 | T:0.975        | C:0.025                   |             |
| chr28                                   | 9425956 | 2 | 40 | G:0.95         | T:0.05                    |             |
| chr28                                   | 9426387 | 2 | 38 | A:0.973684     |                           | G:0.0263158 |
| chr28                                   | 9426951 | 2 | 40 | T:1            | A:0                       |             |
| chr28                                   | 9427212 | 2 | 40 | C:0.95         | T:0.05                    |             |
| chr28                                   | 9427415 | 2 | 36 | A:0.944444     |                           | C:0.0555556 |
| chr28                                   | 9427767 | 2 | 40 | A:0.95         | T:0.05                    |             |
| chr28                                   | 9428233 | 2 | 40 | T:0.975        | C:0.025                   |             |
| chr28                                   | 9428369 | 2 | 40 | G:0.95         | A:0.05                    |             |
| chr28                                   | 9428449 | 2 | 40 | G:0.95         | C:0.05                    |             |
| chr28                                   | 9428465 | 2 | 40 | C:0.975        | T:0.025                   |             |
| chr28                                   | 9428611 | 2 | 36 | ATCTCCCTGGTG:0 |                           | A:1         |
| chr28                                   | 9428625 | 2 | 36 | TATCTTTC:0     |                           | T:1         |
| chr28                                   | 9428633 | 2 | 36 | C:0            | CAAAAAAAAAAAAAAAAAAAAAA:1 |             |
| chr28                                   | 9428636 | 2 | 36 | C:0            | A:1                       |             |
| chr28                                   | 9428727 | 2 | 36 | C:0            | A:1                       |             |
| chr28                                   | 9428782 | 2 | 36 | G:0            | A:1                       |             |
| chr28                                   | 9428833 | 2 | 38 | C:0.947368     |                           | T:0.0526316 |
| chr28                                   | 9428852 | 2 | 40 | C:0            | CA:1                      |             |
| chr28                                   | 9428890 | 2 | 40 | G:0.95         | C:0.05                    |             |
| chr28                                   | 9428914 | 2 | 40 | T:0.95         | C:0.05                    |             |
| chr28                                   | 9428931 | 2 | 40 | T:0            | A:1                       |             |
| chr28                                   | 9429394 | 2 | 40 | A:0.95         | T:0.05                    |             |
| chr28                                   | 9429401 | 2 | 40 | A:0.95         |                           |             |
| ATAAATAAATAAATAAATAAATAAATAAATAAAT:0.05 |         |   |    |                |                           |             |
| chr28                                   | 9429409 | 2 | 40 | G:0.95         | T:0.05                    |             |
| chr28                                   | 9429422 | 2 | 40 | C:0.95         | G:0.05                    |             |
| chr28                                   | 9429460 | 2 | 38 | G:0.947368     |                           | A:0.0526316 |
| chr28                                   | 9429511 | 2 | 36 | G:0.944444     |                           | C:0.0555556 |
| chr28                                   | 9429518 | 2 | 36 | A:1            | G:0                       |             |
| chr28                                   | 9429977 | 2 | 38 | C:0.947368     |                           | T:0.0526316 |
| chr28                                   | 9430651 | 2 | 32 | TA:0.875       | T:0.125                   |             |
| chr28                                   | 9431418 | 2 | 40 | T:0.95         | G:0.05                    |             |
| chr28                                   | 9431600 | 2 | 40 | T:0.95         | C:0.05                    |             |
| chr28                                   | 9431728 | 2 | 40 | TG:0.95        | T:0.05                    |             |
| chr28                                   | 9431746 | 2 | 40 | G:0.95         | T:0.05                    |             |
| chr28                                   | 9431863 | 2 | 36 | C:0.944444     |                           | T:0.0555556 |
| chr28                                   | 9431864 | 2 | 36 | C:0.944444     |                           | G:0.0555556 |
| chr28                                   | 9431869 | 2 | 36 | G:0.944444     |                           | T:0.0555556 |
| chr28                                   | 9432029 | 2 | 40 | G:0.975        | GAC:0.025                 |             |
| chr28                                   | 9432086 | 2 | 38 | G:0.947368     |                           | C:0.0526316 |
| chr28                                   | 9432105 | 2 | 38 | C:0.947368     |                           | T:0.0526316 |
| chr28                                   | 9432107 | 2 | 38 | T:0.947368     |                           | A:0.0526316 |
| chr28                                   | 9432244 | 2 | 40 | C:1            | T:0                       |             |
| chr28                                   | 9432247 | 2 | 40 | C:1            |                           |             |
| CGGGATCCCTGGGTGGCGCAGCGGTTT:0           |         |   |    |                |                           |             |
| chr28                                   | 9432303 | 2 | 38 | T:0.947368     |                           | C:0.0526316 |
| chr28                                   | 9432351 | 2 | 40 | A:0.95         | G:0.05                    |             |
| chr28                                   | 9432764 | 2 | 38 | A:0.947368     |                           | T:0.0526316 |
| chr28                                   | 9432963 | 2 | 38 | G:1            | C:0                       |             |
| chr28                                   | 9433378 | 2 | 40 | CAAAT:0.95     |                           | C:0.05      |
| chr28                                   | 9433708 | 2 | 40 | T:0.95         | C:0.05                    |             |

|                        |         |   |    |                |             |
|------------------------|---------|---|----|----------------|-------------|
| chr28                  | 9433904 | 2 | 38 | C:0.973684     | T:0.0263158 |
| chr28                  | 9434848 | 2 | 38 | C:0.947368     | T:0.0526316 |
| chr28                  | 9435007 | 2 | 36 | G:0.944444     | A:0.0555556 |
| chr28                  | 9435282 | 2 | 40 | A:0.95         | T:0.05      |
| chr28                  | 9435329 | 2 | 40 | G:0.95         | A:0.05      |
| chr28                  | 9435369 | 2 | 40 | G:0.9          | T:0.1       |
| chr28                  | 9435417 | 2 | 40 | A:0.925        | C:0.075     |
| chr28                  | 9435633 | 2 | 38 | G:0.921053     | A:0.0789474 |
| chr28                  | 9435984 | 2 | 36 | G:0.75         | GTT:0.25    |
| chr28                  | 9436029 | 2 | 40 | T:0.95         | C:0.05      |
| chr28                  | 9436182 | 2 | 38 | C:0.947368     | T:0.0526316 |
| chr28                  | 9436385 | 2 | 40 | A:0.975        | G:0.025     |
| chr28                  | 9436531 | 2 | 40 | C:0.925        | T:0.075     |
| chr28                  | 9437044 | 2 | 40 | GAAAAAAGA:0.95 | G:0.05      |
| chr28                  | 9437167 | 3 | 40 | G:0.85         | GAAGA:0.1   |
| GAAGAAAGAAAGAAAGA:0.05 |         |   |    |                |             |
| chr28                  | 9437220 | 2 | 40 | AAG:0.95       | A:0.05      |
| chr28                  | 9438308 | 2 | 38 | T:0.947368     | C:0.0526316 |
| chr28                  | 9438570 | 2 | 40 | A:0.925        | G:0.075     |
| chr28                  | 9438598 | 2 | 40 | A:0.95         | G:0.05      |
| chr28                  | 9439112 | 2 | 40 | G:0.925        | A:0.075     |
| chr28                  | 9439383 | 2 | 38 | A:0.947368     | C:0.0526316 |
| chr28                  | 9439813 | 2 | 40 | C:0.95         | T:0.05      |
| chr28                  | 9439816 | 2 | 40 | C:0.95         | T:0.05      |
| chr28                  | 9439872 | 2 | 40 | G:0.95         | A:0.05      |
| chr28                  | 9440086 | 2 | 40 | G:0.975        | A:0.025     |
| chr28                  | 9440269 | 2 | 38 | T:0.947368     | C:0.0526316 |
| chr28                  | 9440301 | 2 | 38 | C:0.947368     | T:0.0526316 |
| chr28                  | 9440404 | 2 | 34 | T:0.852941     | TA:0.147059 |
| chr28                  | 9441330 | 2 | 40 | T:0.95         | C:0.05      |
| chr28                  | 9441547 | 3 | 38 | ATT:0.842105   | A:0.0789474 |
| AT:0.0789474           |         |   |    |                |             |
| chr28                  | 9441578 | 2 | 36 | A:0.944444     | T:0.0555556 |
| chr28                  | 9441710 | 2 | 36 | CAG:0.944444   | C:0.0555556 |
| chr28                  | 9441745 | 2 | 38 | G:0.947368     | T:0.0526316 |
| chr28                  | 9441756 | 2 | 38 | C:0.947368     | T:0.0526316 |
| chr28                  | 9442441 | 2 | 18 | G:0            | GC:1        |
| chr28                  | 9442473 | 2 | 32 | A:0            | AG:1        |
| chr28                  | 9442561 | 2 | 40 | A:0            | C:1         |
| chr28                  | 9442666 | 2 | 40 | G:1            | A:0         |
| chr28                  | 9442971 | 2 | 40 | C:0.95         | T:0.05      |
| chr28                  | 9443556 | 2 | 38 | CTTTT:0.973684 | C:0.0263158 |
| chr28                  | 9443584 | 2 | 38 | C:0.973684     | T:0.0263158 |
| chr28                  | 9443764 | 2 | 38 | A:0.947368     | G:0.0526316 |
| chr28                  | 9443880 | 2 | 38 | A:0.921053     | T:0.0789474 |
| chr28                  | 9444011 | 2 | 40 | G:0.95         | A:0.05      |
| chr28                  | 9444061 | 2 | 40 | ATGT:0.95      | A:0.05      |
| chr28                  | 9444079 | 2 | 40 | T:0.95         | C:0.05      |
| chr28                  | 9444233 | 2 | 38 | T:1            | A:0         |
| chr28                  | 9444234 | 2 | 38 | T:0.921053     | A:0.0789474 |
| chr28                  | 9444364 | 2 | 38 | A:0.947368     | T:0.0526316 |
| chr28                  | 9444470 | 2 | 38 | C:0.921053     | G:0.0789474 |
| chr28                  | 9445035 | 2 | 38 | G:0.921053     | A:0.0789474 |
| chr28                  | 9445149 | 2 | 40 | T:0.95         | G:0.05      |

|       |         |   |    |                  |          |                |
|-------|---------|---|----|------------------|----------|----------------|
| chr28 | 9445583 | 2 | 40 | GTTCA            | TTCTCC:1 | G:0            |
| chr28 | 9445639 | 2 | 38 | C:0              | CA:1     |                |
| chr28 | 9445772 | 2 | 40 | T:0.95           | G:0.05   |                |
| chr28 | 9445921 | 2 | 38 | C:0.947368       |          | G:0.0526316    |
| chr28 | 9445978 | 2 | 40 | GACAA:0.975      |          | G:0.025        |
| chr28 | 9445984 | 2 | 40 | C:0.975          | T:0.025  |                |
| chr28 | 9446204 | 2 | 38 | A:0.947368       |          | G:0.0526316    |
| chr28 | 9446344 | 2 | 40 | A:1              | T:0      |                |
| chr28 | 9446623 | 3 | 40 | GACAC:0.05       |          | G:0.8 GAC:0.15 |
| chr28 | 9447360 | 2 | 40 | T:0.95           | C:0.05   |                |
| chr28 | 9448027 | 2 | 36 | C:0              | CT:1     |                |
| chr28 | 9448308 | 2 | 38 | T:0.710526       |          | C:0.289474     |
| chr28 | 9448777 | 2 | 34 | A:0.911765       |          | G:0.0882353    |
| chr28 | 9448821 | 2 | 32 | A:0.9375         | T:0.0625 |                |
| chr28 | 9448828 | 2 | 32 | G:0.9375         | A:0.0625 |                |
| chr28 | 9449544 | 2 | 40 | A:0.95           | G:0.05   |                |
| chr28 | 9449897 | 2 | 40 | G:0.9            | A:0.1    |                |
| chr28 | 9449905 | 2 | 40 | A:0.9            | G:0.1    |                |
| chr28 | 9450169 | 2 | 38 | A:0.947368       |          | G:0.0526316    |
| chr28 | 9450262 | 2 | 40 | A:0.95           | G:0.05   |                |
| chr28 | 9450367 | 2 | 36 | C:0.972222       |          | T:0.0277778    |
| chr28 | 9450609 | 2 | 38 | G:0.921053       |          | A:0.0789474    |
| chr28 | 9450610 | 2 | 38 | T:0.921053       |          | A:0.0789474    |
| chr28 | 9450900 | 2 | 40 | G:0.95           | A:0.05   |                |
| chr28 | 9451000 | 2 | 38 | T:0.947368       |          | G:0.0526316    |
| chr28 | 9451020 | 2 | 38 | A:0.947368       |          | G:0.0526316    |
| chr28 | 9451201 | 2 | 40 | T:0.95           | C:0.05   |                |
| chr28 | 9451362 | 2 | 40 | T:0.95           | C:0.05   |                |
| chr28 | 9451900 | 2 | 40 | G:1              | T:0      |                |
| chr28 | 9452012 | 2 | 36 | G:0.944444       |          | A:0.0555556    |
| chr28 | 9452028 | 2 | 36 | T:1              | A:0      |                |
| chr28 | 9452129 | 2 | 38 | T:0.921053       |          | C:0.0789474    |
| chr28 | 9452233 | 2 | 36 | A:0.972222       |          | G:0.0277778    |
| chr28 | 9452270 | 2 | 32 | G:1              | A:0      |                |
| chr28 | 9452314 | 2 | 30 | TG:0.933333      |          | T:0.0666667    |
| chr28 | 9452427 | 2 | 40 | G:0.925          | A:0.075  |                |
| chr28 | 9452712 | 2 | 38 | A:0.947368       |          | G:0.0526316    |
| chr28 | 9452734 | 2 | 40 | T:0.95           | G:0.05   |                |
| chr28 | 9453163 | 3 | 40 | C:0.1            | CA:0.75  | CAA:0.15       |
| chr28 | 9453932 | 2 | 40 | TTATCTCTAAAA:0.9 |          | T:0.1          |
| chr28 | 9454106 | 2 | 38 | A:0.947368       |          | T:0.0526316    |
| chr28 | 9454107 | 2 | 38 | A:0.947368       |          | T:0.0526316    |
| chr28 | 9454196 | 2 | 38 | C:0.947368       |          | T:0.0526316    |
| chr28 | 9454395 | 2 | 40 | T:0.95           | TA:0.05  |                |
| chr28 | 9454706 | 2 | 38 | TC:0.921053      |          | T:0.0789474    |
| chr28 | 9454805 | 2 | 40 | C:0.95           | T:0.05   |                |
| chr28 | 9455025 | 2 | 40 | A:0.95           | C:0.05   |                |
| chr28 | 9455167 | 2 | 38 | T:0.947368       |          | C:0.0526316    |
| chr28 | 9455343 | 2 | 40 | C:0.95           | T:0.05   |                |
| chr28 | 9455449 | 2 | 38 | A:0.947368       |          | G:0.0526316    |
| chr28 | 9455723 | 2 | 36 | A:1              | G:0      |                |
| chr28 | 9455757 | 2 | 36 | T:0.916667       |          | C:0.0833333    |
| chr28 | 9455869 | 2 | 38 | T:1              | C:0      |                |
| chr28 | 9455902 | 2 | 38 | G:1              | A:0      |                |



|                                                          |         |   |    |              |                      |
|----------------------------------------------------------|---------|---|----|--------------|----------------------|
| chr28                                                    | 9456042 | 2 | 34 | C:0.941176   | A:0.0588235          |
| chr28                                                    | 9456143 | 2 | 38 | C:0.973684   | A:0.0263158          |
| chr28                                                    | 9456168 | 2 | 36 | C:0.944444   | CTGTT:0.0555556      |
| chr28                                                    | 9456189 | 2 | 36 | C:0.944444   | T:0.0555556          |
| chr28                                                    | 9456651 | 2 | 40 | C:0.925      | A:0.075              |
| chr28                                                    | 9456873 | 2 | 38 | A:0.947368   | T:0.0526316          |
| chr28                                                    | 9456996 | 2 | 40 | A:0.925      | AGTCAGAATTG:0.075    |
| chr28                                                    | 9457229 | 2 | 40 | C:0.95       | T:0.05               |
| chr28                                                    | 9457587 | 2 | 38 | A:0.947368   | ATACT:0.0526316      |
| chr28                                                    | 9457713 | 2 | 40 | C:0.95       | T:0.05               |
| chr28                                                    | 9457811 | 2 | 40 | T:0.975      |                      |
| TAGAACTTACTGTTTTAAAAAATAAATAAATAAAATAAAATAAAAAAAAA:0.025 |         |   |    |              |                      |
| chr28                                                    | 9457928 | 2 | 40 | C:0.95       | G:0.05               |
| chr28                                                    | 9457936 | 2 | 40 | A:0.95       | G:0.05               |
| chr28                                                    | 9458001 | 2 | 40 | T:0.95       | A:0.05               |
| chr28                                                    | 9458292 | 2 | 38 | A:0.973684   | G:0.0263158          |
| chr28                                                    | 9458778 | 2 | 34 | G:0.970588   | T:0.0294118          |
| chr28                                                    | 9458795 | 2 | 36 | T:0.972222   | C:0.0277778          |
| chr28                                                    | 9459245 | 2 | 38 | G:0.947368   | T:0.0526316          |
| chr28                                                    | 9459498 | 2 | 40 | CA:0.975     | C:0.025              |
| chr28                                                    | 9459828 | 2 | 40 | A:0.95       | G:0.05               |
| chr28                                                    | 9459891 | 2 | 40 | A:0.975      | C:0.025              |
| chr28                                                    | 9460192 | 2 | 38 | T:0.973684   | C:0.0263158          |
| chr28                                                    | 9461215 | 2 | 40 | A:0.95       | G:0.05               |
| chr28                                                    | 9461439 | 2 | 36 | A:0.916667   | G:0.0833333          |
| chr28                                                    | 9462044 | 2 | 38 | A:1          | T:0                  |
| chr28                                                    | 9462052 | 3 | 38 | A:0.421053   | T:0.184211           |
| AT:0.394737                                              |         |   |    |              |                      |
| chr28                                                    | 9462054 | 3 | 38 | T:0.447368   | A:0.184211           |
| TA:0.368421                                              |         |   |    |              |                      |
| chr28                                                    | 9462408 | 2 | 40 | G:0.975      | A:0.025              |
| chr28                                                    | 9462535 | 2 | 38 | A:0.947368   | G:0.0526316          |
| chr28                                                    | 9462713 | 2 | 38 | G:0.947368   | T:0.0526316          |
| chr28                                                    | 9462752 | 2 | 38 | G:0.947368   | T:0.0526316          |
| chr28                                                    | 9462942 | 2 | 38 | A:0.973684   | T:0.0263158          |
| chr28                                                    | 9463848 | 2 | 36 | G:0.916667   | C:0.0833333          |
| chr28                                                    | 9463906 | 2 | 36 | CCT:0.888889 | C:0.111111           |
| chr28                                                    | 9463999 | 2 | 40 | T:0.925      | A:0.075              |
| chr28                                                    | 9464086 | 2 | 40 | CAA:0.95     | C:0.05               |
| chr28                                                    | 9464290 | 2 | 34 | C:0.823529   | CAAT:0.176471        |
| chr28                                                    | 9464350 | 2 | 40 | G:0.975      | A:0.025              |
| chr28                                                    | 9464386 | 3 | 40 | GATAT:0.825  | G:0.05 GAT:<br>0.125 |
| chr28                                                    | 9465510 | 2 | 38 | C:0.973684   | A:0.0263158          |
| chr28                                                    | 9465524 | 3 | 40 | G:0.3        | GATTT:0.55           |
| GATTTATTT:0.15                                           |         |   |    |              |                      |
| chr28                                                    | 9465616 | 2 | 38 | G:1          | A:0                  |
| chr28                                                    | 9465675 | 2 | 38 | G:1          | A:0                  |
| chr28                                                    | 9466782 | 2 | 40 | T:0.95       | C:0.05               |
| chr28                                                    | 9466972 | 2 | 38 | G:0.947368   | A:0.0526316          |
| chr28                                                    | 9467047 | 2 | 36 | G:0.944444   | A:0.0555556          |
| chr28                                                    | 9467215 | 2 | 38 | AG:0.921053  | A:0.0789474          |
| chr28                                                    | 9467298 | 2 | 36 | C:0.944444   | T:0.0555556          |
| chr28                                                    | 9467639 | 2 | 38 | G:0.947368   | T:0.0526316          |

|              |         |   |    |                     |               |
|--------------|---------|---|----|---------------------|---------------|
| chr28        | 9467695 | 2 | 38 | G:0.973684          | A:0.0263158   |
| chr28        | 9467980 | 2 | 38 | C:0.947368          | T:0.0526316   |
| chr28        | 9468105 | 2 | 40 | T:1 C:0             |               |
| chr28        | 9468372 | 2 | 38 | C:0 A:1             |               |
| chr28        | 9468424 | 2 | 40 | G:0 T:1             |               |
| chr28        | 9468495 | 2 | 34 | G:0.882353          | T:0.117647    |
| chr28        | 9468515 | 2 | 26 | GC:0.923077         | G:0.0769231   |
| chr28        | 9468894 | 2 | 40 | A:0.95 G:0.05       |               |
| chr28        | 9468919 | 2 | 40 | T:0.95 G:0.05       |               |
| chr28        | 9469082 | 2 | 36 | A:1 C:0             |               |
| chr28        | 9469240 | 2 | 36 | T:0.916667          | C:0.0833333   |
| chr28        | 9469513 | 2 | 36 | C:0.916667          | T:0.0833333   |
| chr28        | 9469663 | 2 | 40 | G:0.95 A:0.05       |               |
| chr28        | 9469964 | 2 | 38 | A:0.947368          | C:0.0526316   |
| chr28        | 9470952 | 2 | 38 | A:0.947368          | G:0.0526316   |
| chr28        | 9471337 | 2 | 38 | T:1 C:0             |               |
| chr28        | 9471374 | 2 | 38 | A:0.947368          | T:0.0526316   |
| chr28        | 9471647 | 2 | 38 | T:0.947368          | C:0.0526316   |
| chr28        | 9471683 | 2 | 34 | C:1 T:0             |               |
| chr28        | 9471820 | 3 | 36 | TAAA:0.611111       | T:0.0277778   |
| TAA:0.361111 |         |   |    |                     |               |
| chr28        | 9471824 | 2 | 36 | A:0.972222          | T:0.0277778   |
| chr28        | 9471834 | 2 | 36 | A:0.972222          | T:0.0277778   |
| chr28        | 9471878 | 2 | 36 | TA:0.944444         | T:0.0555556   |
| chr28        | 9472139 | 2 | 40 | G:0.975 GAATA:0.025 |               |
| chr28        | 9472160 | 2 | 40 | A:0.975 C:0.025     |               |
| chr28        | 9472164 | 3 | 40 | TA:0.825 T:0.15     | TAA:0.025     |
| chr28        | 9472507 | 2 | 36 | A:0.944444          | T:0.0555556   |
| chr28        | 9472509 | 2 | 36 | A:0.944444          | ATT:0.0555556 |
| chr28        | 9472687 | 2 | 40 | TAA:0.975           | T:0.025       |
| chr28        | 9472771 | 2 | 40 | T:0.95 C:0.05       |               |
| chr28        | 9472811 | 2 | 40 | T:0.925 C:0.075     |               |
| chr28        | 9472976 | 2 | 38 | C:0.947368          | T:0.0526316   |
| chr28        | 9473107 | 2 | 40 | G:0.875 T:0.125     |               |
| chr28        | 9473232 | 2 | 36 | T:0.527778          | C:0.472222    |
| chr28        | 9473467 | 2 | 38 | C:0.973684          | G:0.0263158   |
| chr28        | 9473630 | 2 | 36 | G:0.805556          | A:0.194444    |
| chr28        | 9473921 | 2 | 38 | C:0.947368          | T:0.0526316   |
| chr28        | 9474078 | 2 | 40 | A:0.975 T:0.025     |               |
| chr28        | 9474098 | 2 | 40 | GT:0.95 G:0.05      |               |
| chr28        | 9474243 | 2 | 38 | G:0.947368          | A:0.0526316   |
| chr28        | 9474274 | 2 | 36 | A:0.944444          | G:0.0555556   |
| chr28        | 9474534 | 2 | 40 | C:0.95 G:0.05       |               |
| chr28        | 9475305 | 2 | 36 | C:0.944444          | A:0.0555556   |
| chr28        | 9475872 | 2 | 40 | T:1 TA:0            |               |
| chr28        | 9475873 | 2 | 40 | A:0.95 T:0.05       |               |
| chr28        | 9477403 | 2 | 36 | C:1 G:0             |               |
| chr28        | 9477706 | 2 | 40 | C:0.875 A:0.125     |               |
| chr28        | 9480667 | 2 | 38 | T:0.947368          | C:0.0526316   |
| chr28        | 9481732 | 2 | 40 | G:1 T:0             |               |
| chr28        | 9484016 | 2 | 40 | T:0.675 C:0.325     |               |
| chr28        | 9484192 | 2 | 40 | G:0.9 GTA:0.1       |               |
| chr28        | 9484730 | 2 | 40 | T:0.9 C:0.1         |               |
| chr28        | 9485452 | 2 | 38 | GTA:0.868421        | G:0.131579    |

|           |                     |   |    |                      |                |
|-----------|---------------------|---|----|----------------------|----------------|
| chr28     | 9485454             | 2 | 38 | A:0.947368           | G:0.0526316    |
| chr28     | 9485472             | 2 | 38 | C:0.815789           | T:0.184211     |
| chr28     | 9486159             | 4 | 40 | ATATTTATT:0.225      | A:0.375 ATATT: |
| 0.275     | ATATTTATTTATT:0.125 |   |    |                      |                |
| chr28     | 9486719             | 3 | 38 | TGA:0.894737         | T:0.105263     |
| TGAGA:0   |                     |   |    |                      |                |
| chr28     | 9487304             | 2 | 40 | A:1 C:0              |                |
| chr28     | 9488801             | 2 | 40 | AAG:1 A:0            |                |
| chr28     | 9489052             | 2 | 22 | AT:0.727273          | A:0.272727     |
| chr28     | 9489128             | 2 | 40 | C:1 T:0              |                |
| chr28     | 9489474             | 2 | 36 | T:0 A:1              |                |
| chr28     | 9490421             | 2 | 38 | C:0.789474           | T:0.210526     |
| chr28     | 9492278             | 2 | 38 | G:0.842105           | T:0.157895     |
| chr28     | 9492364             | 2 | 40 | GC:1 G:0             |                |
| chr28     | 9492496             | 2 | 28 | TG:0.0714286         | T:0.928571     |
| chr28     | 9492789             | 2 | 36 | AT:0.111111          | A:0.888889     |
| chr28     | 9492936             | 2 | 38 | C:1 A:0              |                |
| chr28     | 9493004             | 2 | 40 | G:0.95 T:0.05        |                |
| chr28     | 9493238             | 3 | 40 | TTTTATTTA:0.85       | T:0.05 TTTTA:  |
| 0.1       |                     |   |    |                      |                |
| chr28     | 9493368             | 2 | 40 | G:0.875 A:0.125      |                |
| chr28     | 9493572             | 2 | 38 | C:0.789474           | T:0.210526     |
| chr28     | 9493903             | 2 | 38 | C:0.789474           | T:0.210526     |
| chr28     | 9494588             | 2 | 40 | C:1 T:0              |                |
| chr28     | 9494885             | 2 | 40 | CTATGTTTCCTAGT:0.175 | C:0.825        |
| chr28     | 9494918             | 2 | 40 | C:0.95 T:0.05        |                |
| chr28     | 9495016             | 2 | 38 | C:1 G:0              |                |
| chr28     | 9495288             | 2 | 32 | G:0.1875 T:0.8125    |                |
| chr28     | 9495331             | 2 | 36 | A:0.25 AT:0.75       |                |
| chr28     | 9495351             | 2 | 38 | TTTTAAATTA:0.947368  | T:             |
| 0.0526316 |                     |   |    |                      |                |
| chr28     | 9495479             | 2 | 32 | T:0.75 A:0.25        |                |
| chr28     | 9495505             | 2 | 34 | C:0.235294           | A:0.764706     |
| chr28     | 9495512             | 2 | 34 | C:0.235294           | A:0.764706     |
| chr28     | 9495626             | 2 | 38 | C:0.789474           | CACAG:0.210526 |
| chr28     | 9495731             | 2 | 38 | A:0 G:1              |                |
| chr28     | 9495755             | 2 | 40 | G:0.775 A:0.225      |                |
| chr28     | 9495778             | 2 | 40 | G:0.8 A:0.2          |                |
| chr28     | 9496008             | 2 | 38 | T:0.842105           | TATG:0.157895  |
| chr28     | 9496100             | 2 | 36 | C:0.805556           | T:0.194444     |
| chr28     | 9496179             | 2 | 36 | GATT:1 G:0           |                |
| chr28     | 9496208             | 2 | 38 | AG:0.131579          | A:0.868421     |
| chr28     | 9496209             | 2 | 38 | GGAGA:0.868421       | G:0.131579     |
| chr28     | 9496213             | 2 | 38 | A:0.131579           | AG:0.868421    |
| chr28     | 9496260             | 2 | 34 | G:0.147059           | T:0.852941     |
| chr28     | 9496284             | 3 | 34 | T:0.147059           | C:0.852941     |
| G:0       |                     |   |    |                      |                |
| chr28     | 9496489             | 2 | 34 | CT:0.794118          | C:0.205882     |
| chr28     | 9496593             | 2 | 36 | A:0.861111           | G:0.138889     |
| chr28     | 9498183             | 2 | 34 | A:0.794118           | G:0.205882     |
| chr28     | 9498273             | 2 | 40 | A:0.825 T:0.175      |                |
| chr28     | 9498387             | 2 | 34 | A:0.911765           | G:0.0882353    |
| chr28     | 9498587             | 3 | 38 | A:0.184211           | AT:0.815789    |
| ATT:0     |                     |   |    |                      |                |

|              |         |   |    |                                   |               |
|--------------|---------|---|----|-----------------------------------|---------------|
| chr28        | 9498665 | 2 | 38 | A:0.789474                        | G:0.210526    |
| chr28        | 9498680 | 2 | 38 | G:0.789474                        | A:0.210526    |
| chr28        | 9498726 | 2 | 40 | T:0.25                            | G:0.75        |
| chr28        | 9498764 | 2 | 40 | G:0.875                           | A:0.125       |
| chr28        | 9498915 | 3 | 38 | GT:0.552632                       | G:0.236842    |
| GTT:0.210526 |         |   |    |                                   |               |
| chr28        | 9499084 | 2 | 40 | A:0.875                           | AGTTGTT:0.125 |
| chr28        | 9499151 | 2 | 38 | C:0.947368                        | T:0.0526316   |
| chr28        | 9499210 | 2 | 38 | G:0.763158                        | GAA:0.236842  |
| chr28        | 9499407 | 2 | 36 | GA:1                              | G:0           |
| chr28        | 9499490 | 2 | 38 | G:0.815789                        | T:0.184211    |
| chr28        | 9499610 | 2 | 40 | C:0.125                           | T:0.875       |
| chr28        | 9499889 | 2 | 40 | T:0.175                           | G:0.825       |
| chr28        | 9499975 | 2 | 38 | C:0.184211                        | A:0.815789    |
| chr28        | 9500610 | 2 | 40 | A:0.825                           | G:0.175       |
| chr28        | 9500809 | 2 | 40 | A:0.85                            | G:0.15        |
| chr28        | 9501246 | 2 | 38 | C:0.815789                        | T:0.184211    |
| chr28        | 9501285 | 2 | 36 | T:0.166667                        | C:0.833333    |
| chr28        | 9501415 | 3 | 40 | T:0.225                           | TTA:0.25      |
| chr28        | 9501431 | 2 | 40 | AT:0.225                          | A:0.775       |
| chr28        | 9501440 | 2 | 40 | T:0.225                           | A:0.775       |
| chr28        | 9501715 | 2 | 38 | CT:0.236842                       | C:0.763158    |
| chr28        | 9501902 | 2 | 40 | T:0.225                           | C:0.775       |
| chr28        | 9502402 | 2 | 38 | G:0.263158                        | A:0.736842    |
| chr28        | 9502449 | 2 | 40 | C:1                               | T:0           |
| chr28        | 9503233 | 2 | 40 | T:0.2                             | C:0.8         |
| chr28        | 9503303 | 2 | 36 | A:1                               | G:0           |
| chr28        | 9503721 | 2 | 38 | C:1                               | T:0           |
| chr28        | 9503885 | 2 | 36 | T:0.194444                        | G:0.805556    |
| chr28        | 9504296 | 2 | 38 | T:0.868421                        | C:0.131579    |
| chr28        | 9504525 | 2 | 40 | A:0.2                             | C:0.8         |
| chr28        | 9505005 | 2 | 36 | T:0.805556                        | C:0.194444    |
| chr28        | 9505226 | 2 | 34 | A:0.764706                        | G:0.235294    |
| chr28        | 9505395 | 2 | 40 | A:0.825                           | AAAT:0.175    |
| chr28        | 9505549 | 2 | 40 | CTCCTTCCTTTCCTGTATCTTTATGCT:0.175 |               |
| C:0.825      |         |   |    |                                   |               |
| chr28        | 9505860 | 2 | 40 | T:0.775                           | C:0.225       |
| chr28        | 9506135 | 2 | 38 | T:0.815789                        | A:0.184211    |
| chr28        | 9506136 | 2 | 38 | C:0.815789                        | A:0.184211    |
| chr28        | 9506513 | 2 | 38 | T:0.184211                        | A:0.815789    |
| chr28        | 9506791 | 2 | 38 | G:0.210526                        | A:0.789474    |
| chr28        | 9507084 | 2 | 40 | A:0.8                             | G:0.2         |
| chr28        | 9507340 | 2 | 38 | T:0.736842                        | TTCTCTCTCTC:  |
| 0.263158     |         |   |    |                                   |               |
| chr28        | 9508167 | 2 | 38 | T:0.842105                        | C:0.157895    |
| chr28        | 9508173 | 2 | 38 | T:1                               | G:0           |
| chr28        | 9508449 | 2 | 38 | A:0.789474                        | G:0.210526    |
| chr28        | 9508663 | 2 | 40 | G:0.35                            | A:0.65        |
| chr28        | 9508770 | 2 | 36 | G:0.805556                        | A:0.194444    |
| chr28        | 9509126 | 2 | 40 | G:0.8                             | A:0.2         |
| chr28        | 9509282 | 2 | 40 | T:0.825                           | C:0.175       |
| chr28        | 9509465 | 2 | 40 | C:0.875                           | T:0.125       |
| chr28        | 9509494 | 2 | 40 | T:0.15                            | A:0.85        |
| chr28        | 9510303 | 2 | 38 | C:0.210526                        | CT:0.789474   |

|                                |         |   |    |                            |                     |
|--------------------------------|---------|---|----|----------------------------|---------------------|
| chr28                          | 9510340 | 2 | 38 | GTTTT:0.263158             | G:0.736842          |
| chr28                          | 9510675 | 3 | 38 | TAA:0.710526               | T:0.131579          |
| TA:0.157895                    |         |   |    |                            |                     |
| chr28                          | 9511120 | 2 | 34 | AT:1                       | A:0                 |
| chr28                          | 9511125 | 3 | 34 | T:0                        | G:0.823529 TG:      |
| 0.176471                       |         |   |    |                            |                     |
| chr28                          | 9511342 | 2 | 34 | CTTT:0.852941              | C:0.147059          |
| chr28                          | 9511791 | 2 | 40 | T:1                        | C:0                 |
| chr28                          | 9512450 | 3 | 40 | CCTCTCT:0.9                | C:0.1 CCTCT:0       |
| chr28                          | 9512527 | 2 | 40 | A:0.825                    | C:0.175             |
| chr28                          | 9512624 | 2 | 40 | A:0.825                    | C:0.175             |
| chr28                          | 9512645 | 2 | 40 | TG:0.85                    | T:0.15              |
| chr28                          | 9513488 | 5 | 40 | GGT:0.15                   | G:0.025 GGTGT:0.075 |
| GGTGTGTGT:0.3 GGTGTGTGTGT:0.45 |         |   |    |                            |                     |
| chr28                          | 9513529 | 2 | 40 | TTGATTTGCATTTCTCTGA:1      | T:0                 |
| chr28                          | 9513642 | 2 | 38 | CTT:0.289474               | C:0.710526          |
| chr28                          | 9513673 | 2 | 40 | T:0.2                      | C:0.8               |
| chr28                          | 9513850 | 2 | 40 | A:0.15                     | G:0.85              |
| chr28                          | 9513900 | 2 | 30 | C:0.3                      | CTT:0.7             |
| chr28                          | 9514092 | 2 | 40 | C:0.95                     | T:0.05              |
| chr28                          | 9514247 | 2 | 40 | A:1                        | G:0                 |
| chr28                          | 9514276 | 2 | 40 | C:0.85                     | T:0.15              |
| chr28                          | 9514391 | 3 | 38 | CCT:0.763158               | C:0.236842          |
| CCTCT:0                        |         |   |    |                            |                     |
| chr28                          | 9515554 | 2 | 40 | C:0.9                      | T:0.1               |
| chr28                          | 9516333 | 2 | 36 | A:0.111111                 | ATAG:0.888889       |
| chr28                          | 9517458 | 2 | 38 | G:0.894737                 | T:0.105263          |
| chr28                          | 9517894 | 2 | 34 | GA:1                       | G:0                 |
| chr28                          | 9517899 | 2 | 36 | GAAAAGAAAAGAAAAGA:0.861111 |                     |
| G:0.138889                     |         |   |    |                            |                     |
| chr28                          | 9517904 | 2 | 34 | GAAAAGAAAAGA:0.735294      | G:                  |
| 0.264706                       |         |   |    |                            |                     |
| chr28                          | 9517909 | 2 | 40 | GAAAAGA:0.875              | G:0.125             |
| chr28                          | 9517914 | 2 | 40 | GA:0.9                     | G:0.1               |
| chr28                          | 9517928 | 3 | 40 | AAAAAGAAAAG:0.325          | A:0.425             |
| AAAAAG:0.25                    |         |   |    |                            |                     |
| chr28                          | 9518095 | 2 | 38 | GAGAA:0.921053             | G:0.0789474         |
| chr28                          | 9518139 | 2 | 40 | AAAAGAAAAGAAAAG:0.85       | A:0.15              |
| chr28                          | 9518438 | 2 | 36 | G:0.722222                 | T:0.277778          |
| chr28                          | 9518562 | 2 | 38 | C:0.5                      | CT:0.5              |
| chr28                          | 9518567 | 2 | 38 | T:0.5                      | TA:0.5              |
| chr28                          | 9518776 | 2 | 38 | G:0.921053                 | C:0.0789474         |
| chr28                          | 9518823 | 4 | 40 | TAAAA:0.5                  | T:0 TAA:0.3         |
| TAAA:0.2                       |         |   |    |                            |                     |
| chr28                          | 9518931 | 2 | 38 | AC:0.184211                | A:0.815789          |
| chr28                          | 9518934 | 2 | 38 | TGGA:0.184211              | T:0.815789          |
| chr28                          | 9520117 | 2 | 38 | C:0.868421                 | T:0.131579          |
| chr28                          | 9520496 | 2 | 40 | C:0.425                    | G:0.575             |
| chr28                          | 9520512 | 2 | 40 | G:0.425                    | A:0.575             |
| chr28                          | 9520561 | 2 | 38 | A:0.131579                 | T:0.868421          |
| chr28                          | 9520834 | 2 | 34 | CA:0.205882                | C:0.794118          |
| chr28                          | 9520922 | 2 | 38 | G:0.447368                 | T:0.552632          |
| chr28                          | 9520997 | 2 | 34 | G:0.617647                 | A:0.382353          |
| chr28                          | 9521353 | 2 | 38 | T:0.736842                 | A:0.263158          |

|       |                                                   |   |    |                    |              |        |  |
|-------|---------------------------------------------------|---|----|--------------------|--------------|--------|--|
| chr28 | 9521380                                           | 2 | 40 | G:0.55             | A:0.45       |        |  |
| chr28 | 9521388                                           | 2 | 40 | C:0.45             | T:0.55       |        |  |
| chr28 | 9522025                                           | 2 | 36 | C:0.75             | T:0.25       |        |  |
| chr28 | 9522046                                           | 3 | 40 | G:0.8              | GAA:0.025    | GAAA:  |  |
|       | 0.175                                             |   |    |                    |              |        |  |
| chr28 | 9522056                                           | 2 | 36 | AG:0.416667        | A:0.583333   |        |  |
| chr28 | 9522057                                           | 2 | 38 | G:0.789474         | A:0.210526   |        |  |
| chr28 | 9522239                                           | 2 | 40 | A:0.8              | T:0.2        |        |  |
| chr28 | 9522566                                           | 2 | 40 | G:0.775            | T:0.225      |        |  |
| chr28 | 9522631                                           | 2 | 38 | C:0.789474         | T:0.210526   |        |  |
| chr28 | 9522639                                           | 2 | 38 | A:0.552632         | G:0.447368   |        |  |
| chr28 | 9522821                                           | 2 | 40 | C:0.15             | CCTCTGT:0.85 |        |  |
| chr28 | 9523058                                           | 2 | 40 | T:0.825            | G:0.175      |        |  |
| chr28 | 9523213                                           | 2 | 38 | C:0.368421         | T:0.631579   |        |  |
| chr28 | 9524088                                           | 2 | 34 | G:0.411765         | A:0.588235   |        |  |
| chr28 | 9524160                                           | 2 | 36 | T:0.833333         | TC:0.166667  |        |  |
| chr28 | 9524162                                           | 2 | 36 | T:0.833333         | C:0.166667   |        |  |
| chr28 | 9524196                                           | 2 | 36 | T:0.805556         | A:0.194444   |        |  |
| chr28 | 9525081                                           | 2 | 38 | G:0.184211         | A:0.815789   |        |  |
| chr28 | 9525142                                           | 2 | 40 | G:0.825            | A:0.175      |        |  |
| chr28 | 9525692                                           | 2 | 38 | G:0.236842         | C:0.763158   |        |  |
| chr28 | 9525696                                           | 2 | 40 | C:0.125            | T:0.875      |        |  |
| chr28 | 9526115                                           | 2 | 34 | T:0.852941         | TA:0.147059  |        |  |
| chr28 | 9526276                                           | 2 | 38 | G:0.947368         | A:0.0526316  |        |  |
| chr28 | 9526780                                           | 2 | 40 | G:0.775            | C:0.225      |        |  |
| chr28 | 9527150                                           | 2 | 40 | G:0.175            | T:0.825      |        |  |
| chr28 | 9527488                                           | 2 | 30 | A:0.266667         | C:0.733333   |        |  |
| chr28 | 9527492                                           | 2 | 30 | C:0.266667         | A:0.733333   |        |  |
| chr28 | 9527499                                           | 2 | 38 | A:0.105263         | AC:0.894737  |        |  |
| chr28 | 9527529                                           | 4 | 40 | GAAGAAAGA:0.775    | G:0.175      | GAAGA: |  |
|       | 0.05                                              |   |    |                    |              |        |  |
|       | GAAGAAAGAAAGA:0                                   |   |    |                    |              |        |  |
| chr28 | 9527537                                           | 2 | 40 | A:1                | AAAG:0       |        |  |
| chr28 | 9527764                                           | 2 | 38 | A:0.763158         | G:0.236842   |        |  |
| chr28 | 9528033                                           | 2 | 34 | G:0.705882         | T:0.294118   |        |  |
| chr28 | 9528160                                           | 2 | 38 | G:0.368421         | C:0.631579   |        |  |
| chr28 | 9528182                                           | 3 | 38 | T:0.868421         | TA:0.131579  |        |  |
|       | TAA:0                                             |   |    |                    |              |        |  |
| chr28 | 9528207                                           | 2 | 40 | A:0.4              | AAC:0.6      |        |  |
| chr28 | 9528208                                           | 2 | 40 | A:0.825            | AC:0.175     |        |  |
| chr28 | 9528209                                           | 2 | 40 | A:0.825            | AAAC:0.175   |        |  |
| chr28 | 9528216                                           | 2 | 40 | A:1                | AC:0         |        |  |
| chr28 | 9528253                                           | 2 | 38 | T:0.868421         | C:0.131579   |        |  |
| chr28 | 9528902                                           | 2 | 38 | A:0.184211         | G:0.815789   |        |  |
| chr28 | 9529067                                           | 2 | 36 | C:0.166667         | T:0.833333   |        |  |
| chr28 | 9529360                                           | 2 | 40 | C:0.625            |              |        |  |
|       | CACAGAGAAAGAGAGAGAGAGAGAGAGAGAGAGGCGAGAGACA:0.375 |   |    |                    |              |        |  |
| chr28 | 9529491                                           | 2 | 20 | G:0.2              | GT:0.8       |        |  |
| chr28 | 9529511                                           | 2 | 20 | CTTATATTTATTTT:0.6 | C:0.4        |        |  |
| chr28 | 9529577                                           | 2 | 10 | A:0.8              | AAG:0.2      |        |  |
| chr28 | 9529688                                           | 2 | 40 | G:0.825            | T:0.175      |        |  |
| chr28 | 9529766                                           | 2 | 40 | A:0.4              | ACC:0.6      |        |  |
| chr28 | 9529773                                           | 2 | 40 | T:0.175            | C:0.825      |        |  |
| chr28 | 9530088                                           | 2 | 38 | A:0.368421         | G:0.631579   |        |  |
| chr28 | 9531740                                           | 2 | 38 | T:0.842105         | C:0.157895   |        |  |

|              |         |   |    |                   |               |             |
|--------------|---------|---|----|-------------------|---------------|-------------|
| chr28        | 9532276 | 2 | 40 | A:0.325           | G:0.675       |             |
| chr28        | 9533095 | 2 | 40 | A:0.175           | G:0.825       |             |
| chr28        | 9533300 | 2 | 40 | T:0.875           | G:0.125       |             |
| chr28        | 9533491 | 2 | 38 | A:0.368421        |               | T:0.631579  |
| chr28        | 9533685 | 2 | 40 | G:0.325           | T:0.675       |             |
| chr28        | 9533715 | 2 | 40 | T:0.95            | C:0.05        |             |
| chr28        | 9533792 | 2 | 38 | G:0.157895        |               | GT:0.842105 |
| chr28        | 9533874 | 2 | 40 | CT:0.85           | C:0.15        |             |
| chr28        | 9534245 | 2 | 40 | T:0.325           | TA:0.675      |             |
| chr28        | 9534425 | 2 | 40 | T:0.9             | C:0.1         |             |
| chr28        | 9534450 | 3 | 40 | CTTTTATTTTA:0.825 |               | C:0.075     |
| CTTTTA:0.1   |         |   |    |                   |               |             |
| chr28        | 9534493 | 2 | 38 | TTTTA:0.315789    |               | T:0.684211  |
| chr28        | 9534662 | 2 | 38 | C:0.263158        |               | T:0.736842  |
| chr28        | 9534670 | 2 | 36 | TTC:0.972222      |               | T:0.0277778 |
| chr28        | 9534691 | 2 | 36 | T:0.25            | TTTTA:0.75    |             |
| chr28        | 9534741 | 2 | 38 | G:0.868421        |               | C:0.131579  |
| chr28        | 9534747 | 2 | 38 | G:0.315789        |               | A:0.684211  |
| chr28        | 9535206 | 2 | 36 | C:0.333333        |               | T:0.666667  |
| chr28        | 9535650 | 2 | 40 | A:0.25            | G:0.75        |             |
| chr28        | 9535696 | 2 | 40 | C:0.15            | T:0.85        |             |
| chr28        | 9535967 | 2 | 40 | T:0.85            | C:0.15        |             |
| chr28        | 9536027 | 2 | 40 | TC:0.975          | T:0.025       |             |
| chr28        | 9536028 | 3 | 40 | C:0.25            | CTT:0.625     | CTTT:       |
| 0.125        |         |   |    |                   |               |             |
| chr28        | 9536056 | 2 | 36 | T:0.861111        |               | G:0.138889  |
| chr28        | 9536195 | 2 | 34 | C:0.852941        |               | T:0.147059  |
| chr28        | 9536362 | 2 | 38 | T:0.184211        |               | C:0.815789  |
| chr28        | 9536624 | 3 | 34 | TA:0.794118       |               | T:0.0882353 |
| TAA:0.117647 |         |   |    |                   |               |             |
| chr28        | 9537154 | 2 | 36 | A:0.333333        |               | AT:0.666667 |
| chr28        | 9537172 | 2 | 38 | AAC:0.947368      |               | A:0.0526316 |
| chr28        | 9537354 | 2 | 36 | T:1               | A:0           |             |
| chr28        | 9537511 | 2 | 38 | TA:0.315789       |               | T:0.684211  |
| chr28        | 9537555 | 2 | 40 | A:0.275           | T:0.725       |             |
| chr28        | 9537556 | 2 | 40 | T:0.275           | G:0.725       |             |
| chr28        | 9537565 | 2 | 40 | A:0.35            | C:0.65        |             |
| chr28        | 9537697 | 2 | 40 | G:0.925           | C:0.075       |             |
| chr28        | 9537699 | 2 | 40 | G:0.9             | A:0.1         |             |
| chr28        | 9537780 | 2 | 40 | C:0.925           | T:0.075       |             |
| chr28        | 9538134 | 2 | 40 | T:0.35            | TAAAAAAC:0.65 |             |
| chr28        | 9538161 | 2 | 40 | TCA:0.35          | T:0.65        |             |
| chr28        | 9538230 | 2 | 36 | C:0.25            | G:0.75        |             |
| chr28        | 9538320 | 2 | 34 | A:0.264706        |               | AG:0.735294 |
| chr28        | 9538380 | 2 | 30 | G:0.233333        |               | C:0.766667  |
| chr28        | 9538530 | 2 | 30 | A:0.2             | G:0.8         |             |
| chr28        | 9538894 | 2 | 36 | CG:0.166667       |               | C:0.833333  |
| chr28        | 9539003 | 2 | 36 | C:0.333333        |               | G:0.666667  |
| chr28        | 9539029 | 2 | 36 | G:0.305556        |               | T:0.694444  |
| chr28        | 9539131 | 2 | 36 | G:0.194444        |               | C:0.805556  |
| chr28        | 9539496 | 2 | 38 | A:0.421053        |               | G:0.578947  |
| chr28        | 9539650 | 2 | 40 | C:0.95            | CTCTA:0.05    |             |
| chr28        | 9539693 | 2 | 38 | A:0.394737        |               | T:0.605263  |
| chr28        | 9539856 | 2 | 36 | A:0.333333        |               | G:0.666667  |

|                   |         |   |    |                     |                 |
|-------------------|---------|---|----|---------------------|-----------------|
| chr28             | 9539946 | 2 | 38 | C:0.421053          | T:0.578947      |
| chr28             | 9540151 | 2 | 40 | G:0.225 A:0.775     |                 |
| chr28             | 9540383 | 2 | 36 | T:0.305556          | TA:0.694444     |
| chr28             | 9540981 | 2 | 40 | C:1 T:0             |                 |
| chr28             | 9542285 | 2 | 36 | G:0.361111          | C:0.638889      |
| chr28             | 9542524 | 2 | 40 | C:1 G:0             |                 |
| chr28             | 9542826 | 2 | 34 | G:0.382353          | C:0.617647      |
| chr28             | 9543002 | 2 | 40 | G:0.175 T:0.825     |                 |
| chr28             | 9543081 | 2 | 34 | G:0.205882          | C:0.794118      |
| chr28             | 9543089 | 2 | 34 | T:0.970588          | TGTG:0.0294118  |
| chr28             | 9543110 | 2 | 34 | GGT:0.970588        | G:0.0294118     |
| chr28             | 9543112 | 2 | 38 | T:0.526316          | TGGTG:0.473684  |
| chr28             | 9543441 | 2 | 36 | CCCTCTA:0.861111    | C:0.138889      |
| chr28             | 9543447 | 2 | 36 | A:0.333333          | C:0.666667      |
| chr28             | 9543483 | 2 | 38 | TCTCA:0.394737      | T:0.605263      |
| chr28             | 9543487 | 2 | 38 | A:0.789474          | T:0.210526      |
| chr28             | 9543735 | 2 | 38 | C:0.236842          | T:0.763158      |
| chr28             | 9543860 | 3 | 40 | AACACACACAC:0.825   | A:0.15          |
| AACACACACAC:0.025 |         |   |    |                     |                 |
| chr28             | 9544056 | 2 | 38 | A:0.184211          | AT:0.815789     |
| chr28             | 9544375 | 2 | 38 | G:0.263158          | C:0.736842      |
| chr28             | 9544725 | 2 | 38 | C:0.368421          | CT:0.631579     |
| chr28             | 9544848 | 2 | 40 | G:0.975 GTCA:0.025  |                 |
| chr28             | 9545657 | 2 | 36 | G:0.333333          | GC:0.666667     |
| chr28             | 9545740 | 2 | 40 | G:0.325 A:0.675     |                 |
| chr28             | 9546080 | 2 | 40 | C:0.125 CTAAA:0.875 |                 |
| chr28             | 9546249 | 2 | 38 | T:0.315789          | A:0.684211      |
| chr28             | 9546401 | 2 | 38 | G:0.131579          | T:0.868421      |
| chr28             | 9547729 | 2 | 38 | G:1 A:0             |                 |
| chr28             | 9547754 | 2 | 38 | G:0.236842          | GAACTT:0.763158 |
| chr28             | 9547967 | 2 | 38 | T:0.394737          | C:0.605263      |
| chr28             | 9548836 | 2 | 40 | G:1 T:0             |                 |
| chr28             | 9548879 | 2 | 36 | C:1 CCT:0           |                 |
| chr28             | 9548927 | 2 | 38 | T:0.210526          | TA:0.789474     |
| chr28             | 9549186 | 2 | 40 | TAA:0.325           | T:0.675         |
| chr28             | 9549260 | 2 | 40 | C:1 T:0             |                 |
| chr28             | 9549466 | 2 | 40 | T:0.2 G:0.8         |                 |
| chr28             | 9549533 | 2 | 38 | A:0.447368          | G:0.552632      |
| chr28             | 9549617 | 2 | 40 | T:0.275 G:0.725     |                 |
| chr28             | 9550879 | 3 | 40 | GAA:0.15 G:0.75     | GA:0.1          |
| chr28             | 9550955 | 2 | 40 | T:0.1 G:0.9         |                 |
| chr28             | 9551321 | 2 | 36 | AT:0.833333         | A:0.166667      |
| chr28             | 9551324 | 2 | 36 | T:0.166667          | A:0.833333      |
| chr28             | 9551336 | 2 | 36 | C:0.833333          | T:0.166667      |
| chr28             | 9551751 | 2 | 38 | A:0.815789          | G:0.184211      |
| chr28             | 9552058 | 2 | 38 | G:1 A:0             |                 |
| chr28             | 9552210 | 2 | 38 | A:1 G:0             |                 |
| chr28             | 9552368 | 2 | 38 | A:0.894737          | G:0.105263      |
| chr28             | 9552896 | 2 | 38 | GA:0.921053         | G:0.0789474     |
| chr28             | 9552963 | 2 | 34 | T:0.205882          | C:0.794118      |
| chr28             | 9553043 | 2 | 38 | C:0.368421          | CCTCT:0.631579  |
| chr28             | 9553084 | 2 | 38 | T:0.894737          | TA:0.105263     |
| chr28             | 9553085 | 2 | 40 | A:1 T:0             |                 |
| chr28             | 9553087 | 2 | 40 | A:1 AT:0            |                 |



chr28 9553185 2 38 ATTCTT:0.894737 A:0.105263  
chr28 9553297 2 40 CAT:0.95 C:0.05  
chr28 9553608 2 40 G:0.225 A:0.775  
chr28 9553743 2 38 TA:0.842105 T:0.157895  
chr28 9554716 2 36 T:0.694444 G:0.305556  
chr28 9555719 2 38 A:0.842105 C:0.157895  
chr28 9556220 3 40 TA:0.875 T:0.025 TAA:0.1  
chr28 9556926 2 38 C:0.921053 G:0.0789474  
chr28 9557108 2 40 A:1 T:0  
chr28 9557190 2 38 T:0.236842 C:0.763158  
chr28 9557298 2 36 A:0.805556 T:0.194444  
chr28 9557305 2 36 T:0.805556 A:0.194444  
chr28 9557451 2 40 C:1 T:0  
chr28 9558305 2 38 AAGAT:0.842105 A:0.157895  
chr28 9558311 3 38 G:0.263158 T:0.684211  
GATTTATTTATTTATTT:0.0526316  
chr28 9558838 2 36 T:0.194444 C:0.805556  
chr28 9559014 2 40 G:0.175 GA:0.825  
chr28 9559483 2 36 G:0.25 A:0.75  
chr28 9559536 6 40  
ATTTCTTTTCTTTTCTTTTCTTTTCTTTTCT:0.25 A:0.625 ATTTCT:0  
ATTTCTTTTCTTTTCT:0.025 ATTTCTTTTCTTTTCTTTTCT:0.1  
ATTTCTTTTCTTTTCTTTTCTTTTCT:0  
chr28 9559552 2 34 TTTCTTTTCTTTTCTTTTCTTTTCTTTTC:1  
T:0  
chr28 9560695 2 38 A:0.184211 G:0.815789  
chr28 9560734 2 38 C:0.157895 T:0.842105  
chr28 9561005 2 30 G:0.233333 GAA:0.766667  
chr28 9561271 2 36 T:0.277778 C:0.722222  
chr28 9561290 2 36 G:0.25 A:0.75  
chr28 9561550 2 36 G:0.361111 A:0.638889  
chr28 9561952 2 38 C:0.184211 CCT:0.815789  
chr28 9561991 2 38 T:0.894737 A:0.105263  
chr28 9561992 2 38 T:0.894737 A:0.105263  
chr28 9562048 2 40 T:0.9  
TAAGCGTCTGACTCTTAAAAATAAAAAAAAAAATAAATAAATAAAAAAAAAA:0.1  
chr28 9562139 3 36 TAAAAA:0.166667 T:0.166667  
TAAAAA:0.666667  
chr28 9562141 2 34 A:0.411765 T:0.588235  
chr28 9562226 2 36 C:0.916667 T:0.0833333  
chr28 9562307 2 36 A:0.277778 G:0.722222  
chr28 9562854 2 12 GTC:0.916667 G:0.0833333  
chr28 9562963 2 30 C:0.3 T:0.7  
chr28 9563089 2 38 ACTTC:1 A:0  
chr28 9563094 2 38 T:1 G:0  
chr28 9563687 2 38 T:0.157895 C:0.842105  
chr28 9563689 2 38 T:1 C:0  
chr28 9563728 2 40 G:1 A:0  
chr28 9563806 2 40 C:0.2 T:0.8  
chr28 9563872 2 40 A:0.175 G:0.825  
chr28 9563966 2 40 T:0.225 C:0.775  
chr28 9564087 2 40 T:0.15 A:0.85  
chr28 9564157 4 40 CATATATATATATATATAT:0.025 C:0.125  
CAT:0.75 CATATATATATATATAT:0.1

|       |         |   |    |                   |                   |
|-------|---------|---|----|-------------------|-------------------|
| chr28 | 9564232 | 2 | 36 | A:0.138889        | G:0.861111        |
| chr28 | 9564455 | 2 | 36 | C:0.166667        | A:0.833333        |
| chr28 | 9564517 | 2 | 36 | C:0.222222        | T:0.777778        |
| chr28 | 9564662 | 2 | 36 | ATACC:0.194444    | A:0.805556        |
| chr28 | 9564839 | 2 | 38 | A:0.394737        | ATCTC:0.605263    |
| chr28 | 9564860 | 2 | 38 | T:0.973684        | TC:0.0263158      |
| chr28 | 9564863 | 2 | 38 | T:0.973684        | TTC:0.0263158     |
| chr28 | 9564880 | 2 | 38 | C:1 T:0           |                   |
| chr28 | 9564988 | 2 | 34 | C:0.205882        | T:0.794118        |
| chr28 | 9565137 | 2 | 38 | G:0.184211        | A:0.815789        |
| chr28 | 9565255 | 2 | 40 | T:1 G:0           |                   |
| chr28 | 9565492 | 2 | 38 | T:0.131579        | A:0.868421        |
| chr28 | 9565976 | 2 | 38 | CT:1 C:0          |                   |
| chr28 | 9566010 | 2 | 38 | C:0.210526        | T:0.789474        |
| chr28 | 9566172 | 2 | 40 | CTTCCTAT:0.175    | C:0.825           |
| chr28 | 9566326 | 2 | 40 | T:1 C:0           |                   |
| chr28 | 9566408 | 2 | 40 | T:0.225 C:0.775   |                   |
| chr28 | 9566466 | 2 | 40 | T:1 C:0           |                   |
| chr28 | 9566635 | 2 | 36 | CT:0.194444       | C:0.805556        |
| chr28 | 9566638 | 2 | 36 | T:0.222222        | C:0.777778        |
| chr28 | 9566641 | 3 | 38 | T:1 TTTTC:0       | TTTTTC:0          |
| chr28 | 9566845 | 2 | 36 | A:0.194444        | T:0.805556        |
| chr28 | 9566980 | 3 | 36 | CAA:0.222222      | C:0.777778        |
| CA:0  |         |   |    |                   |                   |
| chr28 | 9567018 | 2 | 36 | C:0.166667        | T:0.833333        |
| chr28 | 9567089 | 2 | 36 | A:0.166667        | G:0.833333        |
| chr28 | 9567242 | 2 | 36 | C:0.166667        | T:0.833333        |
| chr28 | 9567334 | 2 | 38 | T:0.184211        | G:0.815789        |
| chr28 | 9567374 | 2 | 36 | T:0.222222        | TAAAAA:0.777778   |
| chr28 | 9567491 | 2 | 40 | A:0.175 T:0.825   |                   |
| chr28 | 9567567 | 2 | 38 | A:0.157895        | G:0.842105        |
| chr28 | 9567838 | 2 | 40 | T:1 C:0           |                   |
| chr28 | 9568410 | 2 | 40 | C:1 T:0           |                   |
| chr28 | 9568453 | 2 | 38 | A:0.184211        | C:0.815789        |
| chr28 | 9568758 | 2 | 36 | T:1 G:0           |                   |
| chr28 | 9568823 | 2 | 38 | T:0.210526        | C:0.789474        |
| chr28 | 9568867 | 2 | 40 | T:1 A:0           |                   |
| chr28 | 9568868 | 2 | 40 | A:1 T:0           |                   |
| chr28 | 9568876 | 2 | 40 | A:1 T:0           |                   |
| chr28 | 9568938 | 2 | 40 | TAC:1 T:0         |                   |
| chr28 | 9569039 | 2 | 38 | C:1 CAT:0         |                   |
| chr28 | 9569139 | 2 | 40 | A:0.95 G:0.05     |                   |
| chr28 | 9569192 | 2 | 40 | A:1 AG:0          |                   |
| chr28 | 9569449 | 2 | 38 | T:1 C:0           |                   |
| chr28 | 9569456 | 2 | 38 | T:1 C:0           |                   |
| chr28 | 9569549 | 2 | 38 | A:1 T:0           |                   |
| chr28 | 9569567 | 2 | 38 | A:0.184211        | G:0.815789        |
| chr28 | 9569730 | 2 | 38 | A:1 G:0           |                   |
| chr28 | 9569792 | 2 | 40 | C:1 T:0           |                   |
| chr28 | 9569865 | 2 | 40 | T:0.95 TA:0.05    |                   |
| chr28 | 9569873 | 3 | 40 | A:0.15 AAAG:0.025 | AAAAAAG:<br>0.825 |
| chr28 | 9569932 | 2 | 36 | T:1 G:0           |                   |
| chr28 | 9569936 | 2 | 36 | T:1 C:0           |                   |

|                                  |         |               |    |              |                          |              |
|----------------------------------|---------|---------------|----|--------------|--------------------------|--------------|
| chr28                            | 9570043 | 2             | 40 | T:1          | A:0                      |              |
| chr28                            | 9570739 | 2             | 38 | T:0.236842   |                          | TA:0.763158  |
| chr28                            | 9570895 | 2             | 40 | C:1          | T:0                      |              |
| chr28                            | 9571027 | 2             | 40 | T:1          | A:0                      |              |
| chr28                            | 9571090 | 2             | 40 | A:1          | T:0                      |              |
| chr28                            | 9571210 | 2             | 36 | C:1          | T:0                      |              |
| chr28                            | 9571231 | 2             | 36 | TA:0.166667  |                          | T:0.833333   |
| chr28                            | 9571414 | 2             | 38 | T:0.131579   |                          | G:0.868421   |
| chr28                            | 9571507 | 2             | 38 | A:0.157895   |                          | G:0.842105   |
| chr28                            | 9571879 | 2             | 40 | A:0.175      | T:0.825                  |              |
| chr28                            | 9572284 | 2             | 32 | TCAG:0.40625 |                          | T:0.59375    |
| chr28                            | 9572372 | 4             | 28 | AG:0.214286  |                          | A:0.0357143  |
| AGG:0.321429                     |         | AGGG:0.428571 |    |              |                          |              |
| chr28                            | 9574033 | 2             | 36 | G:1          | T:0                      |              |
| chr28                            | 9574255 | 2             | 38 | G:0.973684   |                          | T:0.0263158  |
| chr28                            | 9574382 | 2             | 38 | G:1          | C:0                      |              |
| chr28                            | 9574497 | 2             | 38 | G:0.868421   |                          | GT:0.131579  |
| chr28                            | 9574508 | 2             | 40 | T:1          | TTTA:0                   |              |
| chr28                            | 9574595 | 2             | 40 | C:1          | T:0                      |              |
| chr28                            | 9574685 | 2             | 40 | C:1          | T:0                      |              |
| chr28                            | 9574911 | 2             | 38 | G:1          | T:0                      |              |
| chr28                            | 9575111 | 2             | 36 | T:0.916667   |                          | TG:0.0833333 |
| chr28                            | 9575539 | 2             | 40 | T:1          | TC:0                     |              |
| chr28                            | 9575563 | 2             | 40 | G:1          | T:0                      |              |
| chr28                            | 9575754 | 2             | 38 | A:1          | G:0                      |              |
| chr28                            | 9575783 | 2             | 38 | A:1          | T:0                      |              |
| chr28                            | 9576019 | 2             | 40 | A:1          | T:0                      |              |
| chr28                            | 9576029 | 2             | 40 | A:1          | T:0                      |              |
| chr28                            | 9576357 | 2             | 38 | T:1          | G:0                      |              |
| chr28                            | 9576358 | 2             | 38 | T:1          | C:0                      |              |
| chr28                            | 9576589 | 2             | 40 | G:1          | A:0                      |              |
| chr28                            | 9576677 | 2             | 38 | C:0.131579   |                          | G:0.868421   |
| chr28                            | 9577179 | 2             | 40 | ATAAAG:1     | A:0                      |              |
| chr28                            | 9577329 | 2             | 32 | TG:1         | T:0                      |              |
| chr28                            | 9577593 | 2             | 40 | A:0.8        | G:0.2                    |              |
| chr28                            | 9577819 | 2             | 40 | A:1          | G:0                      |              |
| chr28                            | 9577997 | 2             | 36 | C:1          | T:0                      |              |
| chr28                            | 9578021 | 2             | 40 | C:0.925      | CGGG:0.075               |              |
| chr28                            | 9578022 | 2             | 40 | A:0.925      | ATCCCTGGGTGGCGC:0.075    |              |
| chr28                            | 9578024 | 2             | 40 | G:0.925      | GCGGTTTGGCGCCTGCCT:0.075 |              |
| chr28                            | 9578050 | 2             | 40 | G:0.875      | A:0.125                  |              |
| chr28                            | 9578247 | 2             | 38 | A:1          | G:0                      |              |
| chr28                            | 9578336 | 2             | 40 | A:1          |                          |              |
| ATTATCTTTATTATTTCTTTTTTTTTTTTT:0 |         |               |    |              |                          |              |
| chr28                            | 9578932 | 2             | 38 | T:1          | G:0                      |              |
| chr28                            | 9579011 | 2             | 40 | A:1          | ATATAGAATATATGTCAT:0     |              |
| chr28                            | 9579015 | 2             | 40 | A:1          | ATAT:0                   |              |
| chr28                            | 9579016 | 2             | 40 | C:1          | G:0                      |              |
| chr28                            | 9579207 | 2             | 40 | G:1          | A:0                      |              |
| chr28                            | 9579410 | 2             | 40 | C:1          | T:0                      |              |
| chr28                            | 9579440 | 2             | 40 | T:1          | C:0                      |              |
| chr28                            | 9579871 | 2             | 40 | G:1          | T:0                      |              |
| chr28                            | 9580107 | 2             | 38 | A:0.184211   |                          | G:0.815789   |
| chr28                            | 9580128 | 2             | 38 | C:0.184211   |                          | T:0.815789   |

|       |         |   |    |                 |                  |
|-------|---------|---|----|-----------------|------------------|
| chr28 | 9580216 | 2 | 38 | G:0.105263      | A:0.894737       |
| chr28 | 9580396 | 2 | 38 | T:1 G:0         |                  |
| chr28 | 9580457 | 2 | 38 | G:1 A:0         |                  |
| chr28 | 9580922 | 2 | 38 | A:1 AT:0        |                  |
| chr28 | 9580931 | 2 | 38 | C:1 CCA:0       |                  |
| chr28 | 9581200 | 2 | 36 | TA:0.916667     | T:0.0833333      |
| chr28 | 9581214 | 2 | 36 | AT:0.916667     | A:0.0833333      |
| chr28 | 9581215 | 2 | 36 | T:0.222222      | A:0.777778       |
| chr28 | 9581374 | 2 | 36 | G:1 A:0         |                  |
| chr28 | 9581495 | 2 | 36 | G:1 A:0         |                  |
| chr28 | 9581533 | 2 | 38 | G:1 A:0         |                  |
| chr28 | 9581568 | 2 | 40 | G:1 A:0         |                  |
| chr28 | 9581640 | 2 | 40 | T:1 C:0         |                  |
| chr28 | 9581651 | 2 | 40 | C:0.875 T:0.125 |                  |
| chr28 | 9581821 | 2 | 36 | G:1 A:0         |                  |
| chr28 | 9581918 | 2 | 36 | A:1 G:0         |                  |
| chr28 | 9582135 | 2 | 40 | T:1 C:0         |                  |
| chr28 | 9582608 | 2 | 38 | A:1 G:0         |                  |
| chr28 | 9582966 | 2 | 40 | A:1 AT:0        |                  |
| chr28 | 9582975 | 2 | 40 | G:1 A:0         |                  |
| chr28 | 9582976 | 2 | 40 | C:0.2 CT:0.8    |                  |
| chr28 | 9582986 | 2 | 40 | T:1 TA:0        |                  |
| chr28 | 9583014 | 2 | 40 | TGAGA:0.95      | T:0.05           |
| chr28 | 9583915 | 2 | 40 | A:1 AGT:0       |                  |
| chr28 | 9584159 | 2 | 38 | G:1 GC:0        |                  |
| chr28 | 9584161 | 2 | 38 | G:1 A:0         |                  |
| chr28 | 9584202 | 2 | 40 | A:0.875 G:0.125 |                  |
| chr28 | 9584260 | 2 | 36 | G:1 GTC:0       |                  |
| chr28 | 9584262 | 2 | 38 | C:1 CTA:0       |                  |
| chr28 | 9585083 | 2 | 38 | G:1 A:0         |                  |
| chr28 | 9585095 | 2 | 38 | A:1 G:0         |                  |
| chr28 | 9585230 | 2 | 38 | C:0.868421      | T:0.131579       |
| chr28 | 9585360 | 2 | 36 | G:0.888889      | GT:0.111111      |
| chr28 | 9586291 | 2 | 38 | A:1 G:0         |                  |
| chr28 | 9586670 | 2 | 40 | G:1 A:0         |                  |
| chr28 | 9587213 | 2 | 38 | C:1 CT:0        |                  |
| chr28 | 9587279 | 2 | 38 | T:1 C:0         |                  |
| chr28 | 9587607 | 2 | 40 | C:1 G:0         |                  |
| chr28 | 9587634 | 2 | 40 | T:1 C:0         |                  |
| chr28 | 9587706 | 2 | 38 | G:1 GT:0        |                  |
| chr28 | 9588002 | 2 | 36 | C:1 T:0         |                  |
| chr28 | 9588003 | 2 | 36 | A:1 G:0         |                  |
| chr28 | 9589333 | 2 | 36 | G:1 A:0         |                  |
| chr28 | 9590225 | 2 | 36 | G:0.138889      | A:0.861111       |
| chr28 | 9590592 | 2 | 40 | G:1 T:0         |                  |
| chr28 | 9590966 | 2 | 38 | A:0.157895      | G:0.842105       |
| chr28 | 9591226 | 3 | 40 | GTA:0.675       | G:0.175 GTATATA: |
| 0.15  |         |   |    |                 |                  |
| chr28 | 9591411 | 2 | 36 | A:0.138889      | T:0.861111       |
| chr28 | 9591551 | 2 | 40 | C:1 T:0         |                  |
| chr28 | 9591697 | 2 | 40 | A:1 C:0         |                  |
| chr28 | 9591720 | 2 | 40 | C:1 T:0         |                  |
| chr28 | 9591912 | 2 | 38 | A:1 AG:0        |                  |
| chr28 | 9591913 | 3 | 38 | AT:0.131579     | A:0.868421       |

|              |         |   |    |             |             |             |  |
|--------------|---------|---|----|-------------|-------------|-------------|--|
| TT:0         |         |   |    |             |             |             |  |
| chr28        | 9592007 | 2 | 38 | G:1         | A:0         |             |  |
| chr28        | 9592121 | 2 | 40 | C:1         | T:0         |             |  |
| chr28        | 9592682 | 2 | 40 | G:0.9       | GT:0.1      |             |  |
| chr28        | 9593230 | 2 | 40 | T:0.1       | C:0.9       |             |  |
| chr28        | 9593310 | 2 | 38 | C:1         | T:0         |             |  |
| chr28        | 9593919 | 2 | 40 | C:1         | G:0         |             |  |
| chr28        | 9593973 | 2 | 40 | T:1         | C:0         |             |  |
| chr28        | 9594038 | 2 | 40 | G:1         | A:0         |             |  |
| chr28        | 9595125 | 2 | 40 | T:1         | C:0         |             |  |
| chr28        | 9595450 | 2 | 40 | G:0.65      | T:0.35      |             |  |
| chr28        | 9595656 | 2 | 40 | T:1         | C:0         |             |  |
| chr28        | 9596638 | 2 | 38 | T:0.842105  |             | C:0.157895  |  |
| chr28        | 9596694 | 2 | 36 | G:1         | A:0         |             |  |
| chr28        | 9597063 | 2 | 38 | T:1         | C:0         |             |  |
| chr28        | 9599398 | 2 | 40 | A:1         | AT:0        |             |  |
| chr28        | 9599515 | 2 | 38 | C:0.868421  |             | T:0.131579  |  |
| chr28        | 9599719 | 2 | 40 | C:1         | T:0         |             |  |
| chr28        | 9599929 | 2 | 38 | G:1         | A:0         |             |  |
| chr28        | 9599962 | 3 | 36 | CT:0.555556 |             | C:0.277778  |  |
| CTT:0.166667 |         |   |    |             |             |             |  |
| chr28        | 9600142 | 2 | 40 | G:0.9       | GAA:0.1     |             |  |
| chr28        | 9600972 | 2 | 38 | G:0.0789474 |             | A:0.921053  |  |
| chr28        | 9601336 | 2 | 36 | T:1         | C:0         |             |  |
| chr28        | 9601346 | 2 | 32 | G:0.625     | GTTT:0.375  |             |  |
| chr28        | 9601688 | 2 | 38 | A:0.973684  |             | T:0.0263158 |  |
| chr28        | 9601819 | 2 | 40 | C:0.975     | CT:0.025    |             |  |
| chr28        | 9602071 | 2 | 38 | G:1         | T:0         |             |  |
| chr28        | 9602515 | 2 | 40 | C:0.875     | CAGAG:0.125 |             |  |
| chr28        | 9602556 | 2 | 38 | T:0.921053  |             | C:0.0789474 |  |
| chr28        | 9602709 | 2 | 36 | G:1         | T:0         |             |  |
| chr28        | 9602781 | 2 | 40 | G:0.85      | A:0.15      |             |  |
| chr28        | 9603071 | 2 | 38 | G:1         | A:0         |             |  |
| chr28        | 9603595 | 2 | 40 | C:1         | T:0         |             |  |
| chr28        | 9603705 | 2 | 40 | CAAATGT:1   |             | C:0         |  |
| chr28        | 9603737 | 2 | 40 | G:0.875     | A:0.125     |             |  |
| chr28        | 9603866 | 2 | 40 | A:0.95      | G:0.05      |             |  |
| chr28        | 9604113 | 2 | 40 | C:1         | CAAT:0      |             |  |
| chr28        | 9604502 | 2 | 40 | C:1         | T:0         |             |  |
| chr28        | 9604526 | 2 | 40 | C:0.125     | G:0.875     |             |  |
| chr28        | 9604595 | 2 | 34 | A:1         | AT:0        |             |  |
| chr28        | 9604900 | 2 | 38 | C:0.684211  |             | T:0.315789  |  |
| chr28        | 9604964 | 2 | 40 | A:0.875     | AATT:0.125  |             |  |
| chr28        | 9605189 | 2 | 40 | T:1         | C:0         |             |  |
| chr28        | 9605274 | 2 | 38 | C:1         | T:0         |             |  |
| chr28        | 9605900 | 2 | 40 | A:1         | G:0         |             |  |
| chr28        | 9606015 | 2 | 40 | A:1         | G:0         |             |  |
| chr28        | 9606378 | 2 | 40 | A:1         | C:0         |             |  |
| chr28        | 9607071 | 2 | 40 | A:0.725     | G:0.275     |             |  |
| chr28        | 9607195 | 2 | 40 | G:1         | A:0         |             |  |
| chr28        | 9607695 | 2 | 40 | T:0.275     | TG:0.725    |             |  |
| chr28        | 9608901 | 2 | 40 | C:0.9       | T:0.1       |             |  |
| chr28        | 9609333 | 2 | 38 | C:0.131579  |             | T:0.868421  |  |
| chr28        | 9609384 | 2 | 38 | A:1         | G:0         |             |  |

|             |         |   |    |                   |             |               |
|-------------|---------|---|----|-------------------|-------------|---------------|
| chr28       | 9609453 | 2 | 38 | AG:1              | A:0         |               |
| chr28       | 9609874 | 2 | 40 | T:1               | C:0         |               |
| chr28       | 9609894 | 2 | 40 | G:1               | A:0         |               |
| chr28       | 9609925 | 2 | 40 | C:0.875           | CAAAT:0.125 |               |
| chr28       | 9610424 | 2 | 40 | C:1               | G:0         |               |
| chr28       | 9610717 | 2 | 40 | T:0.125           | A:0.875     |               |
| chr28       | 9610718 | 3 | 40 | T:0.125           | A:0.875     | TA:0          |
| chr28       | 9610948 | 2 | 38 | A:0.868421        |             | T:0.131579    |
| chr28       | 9611116 | 2 | 36 | C:0.944444        |             | CTT:0.0555556 |
| chr28       | 9612034 | 2 | 40 | G:1               | A:0         |               |
| chr28       | 9612691 | 2 | 40 | G:1               | A:0         |               |
| chr28       | 9612988 | 2 | 38 | G:1               | A:0         |               |
| chr28       | 9613566 | 2 | 40 | C:0.25            | CT:0.75     |               |
| chr28       | 9614922 | 2 | 40 | ACTTT:0.8         |             | A:0.2         |
| chr28       | 9615103 | 2 | 40 | C:1               | G:0         |               |
| chr28       | 9615195 | 3 | 40 | G:0.175           | GA:0.075    | GAA:0.75      |
| chr28       | 9615206 | 2 | 40 | C:1               | A:0         |               |
| chr28       | 9615427 | 2 | 38 | T:1               | C:0         |               |
| chr28       | 9615564 | 2 | 40 | T:0.125           | G:0.875     |               |
| chr28       | 9616775 | 2 | 40 | A:0.075           | C:0.925     |               |
| chr28       | 9616846 | 2 | 40 | A:1               | C:0         |               |
| chr28       | 9616922 | 2 | 40 | TA:0.1            | T:0.9       |               |
| chr28       | 9616934 | 2 | 40 | A:0.1             | C:0.9       |               |
| chr28       | 9617161 | 2 | 38 | T:1               | C:0         |               |
| chr28       | 9617887 | 2 | 36 | C:1               | T:0         |               |
| chr28       | 9618073 | 2 | 38 | A:1               | T:0         |               |
| chr28       | 9619536 | 2 | 38 | A:1               | G:0         |               |
| chr28       | 9620179 | 2 | 40 | AG:0.9            | A:0.1       |               |
| chr28       | 9620202 | 2 | 40 | G:1               | A:0         |               |
| chr28       | 9620729 | 2 | 38 | A:0.105263        |             | T:0.894737    |
| chr28       | 9620950 | 2 | 40 | T:0.85            | C:0.15      |               |
| chr28       | 9621608 | 2 | 38 | C:1               | T:0         |               |
| chr28       | 9622738 | 2 | 38 | ATT:0.631579      |             | A:0.368421    |
| chr28       | 9623784 | 2 | 38 | A:0.0789474       |             | G:0.921053    |
| chr28       | 9623870 | 2 | 40 | A:0.95            | G:0.05      |               |
| chr28       | 9624327 | 2 | 40 | C:0.125           | T:0.875     |               |
| chr28       | 9624715 | 2 | 38 | A:0.131579        |             | G:0.868421    |
| chr28       | 9625347 | 2 | 38 | T:0.868421        |             | C:0.131579    |
| chr28       | 9625621 | 2 | 40 | A:1               | G:0         |               |
| chr28       | 9626145 | 2 | 40 | TG:1              | T:0         |               |
| chr28       | 9626211 | 2 | 40 | T:1               | C:0         |               |
| chr28       | 9627016 | 2 | 40 | A:1               | C:0         |               |
| chr28       | 9627355 | 2 | 38 | C:0.894737        |             | A:0.105263    |
| chr28       | 9628345 | 2 | 40 | C:0.1             | T:0.9       |               |
| chr28       | 9629034 | 2 | 38 | A:0.868421        |             | T:0.131579    |
| chr28       | 9630247 | 2 | 36 | A:0.916667        |             | AAG:0.0833333 |
| chr28       | 9630576 | 2 | 40 | C:0.925           | CAT:0.075   |               |
| chr28       | 9630904 | 2 | 40 | A:0.175           | G:0.825     |               |
| chr28       | 9630930 | 2 | 40 | C:1               | T:0         |               |
| chr28       | 9630936 | 2 | 40 | A:0.125           | T:0.875     |               |
| chr28       | 9631549 | 2 | 36 | A:0.861111        |             | T:0.138889    |
| chr28       | 9632064 | 2 | 40 | CT:1              | C:0         |               |
| chr28       | 9632137 | 4 | 40 | G:0.775           | GCATT:0.125 |               |
| GCATTCATT:0 |         |   |    | GCATTCATTCATT:0.1 |             |               |

|                                                |         |   |    |                    |                |
|------------------------------------------------|---------|---|----|--------------------|----------------|
| chr28                                          | 9632654 | 2 | 36 | G:0.916667         | A:0.0833333    |
| chr28                                          | 9632733 | 2 | 38 | A:0.894737         | ATCTG:0.105263 |
| chr28                                          | 9632756 | 2 | 38 | TGGCTACAG:0.947368 | T:             |
| 0.0526316                                      |         |   |    |                    |                |
| chr28                                          | 9632783 | 2 | 40 | G:0.725            | A:0.275        |
| chr28                                          | 9632961 | 2 | 40 | T:1                | TTTTG:0        |
| chr28                                          | 9633726 | 2 | 40 | C:0.9              | T:0.1          |
| chr28                                          | 9633821 | 2 | 40 | GATTT:0.55         | G:0.45         |
| chr28                                          | 9634589 | 2 | 40 | C:0.95             | CT:0.05        |
| chr28                                          | 9634607 | 2 | 40 | T:0.125            | G:0.875        |
| chr28                                          | 9634619 | 2 | 40 | TTTTG:0.15         | T:0.85         |
| chr28                                          | 9634690 | 2 | 38 | G:1                | A:0            |
| chr28                                          | 9634767 | 2 | 36 | G:0.444444         | A:0.555556     |
| chr28                                          | 9635248 | 2 | 38 | G:0.868421         | T:0.131579     |
| chr28                                          | 9635437 | 2 | 38 | G:1                | A:0            |
| chr28                                          | 9635479 | 2 | 40 | G:0.825            | T:0.175        |
| chr28                                          | 9635722 | 2 | 38 | C:0.157895         | T:0.842105     |
| chr28                                          | 9637485 | 2 | 32 | G:0.875            | A:0.125        |
| chr28                                          | 9637689 | 2 | 38 | G:0.868421         | A:0.131579     |
| chr28                                          | 9638048 | 2 | 40 | A:0                | AT:1           |
| chr28                                          | 9638178 | 3 | 38 | TAA:0.315789       | T:0.0789474    |
| TA:0.605263                                    |         |   |    |                    |                |
| chr28                                          | 9638628 | 2 | 40 | C:0.85             | T:0.15         |
| chr28                                          | 9638765 | 2 | 38 | G:0.0789474        | A:0.921053     |
| chr28                                          | 9638891 | 2 | 40 | AT:0.1             | A:0.9          |
| chr28                                          | 9638897 | 2 | 40 | T:0.1              | A:0.9          |
| chr28                                          | 9638903 | 2 | 38 | TTTTTA:0.763158    | T:0.236842     |
| chr28                                          | 9638904 | 2 | 38 | TTTTA:0.342105     | T:0.657895     |
| chr28                                          | 9639007 | 2 | 38 | T:0.157895         | C:0.842105     |
| chr28                                          | 9639582 | 2 | 40 | G:1                | A:0            |
| chr28                                          | 9640520 | 2 | 36 | T:1                | C:0            |
| chr28                                          | 9640812 | 2 | 38 | C:0.842105         | T:0.157895     |
| chr28                                          | 9640917 | 2 | 38 | A:1                | T:0            |
| chr28                                          | 9641210 | 2 | 36 | C:1                | T:0            |
| chr28                                          | 9641320 | 3 | 30 | TAAAAAAA:0.233333  | T:             |
| 0.333333 TA:0.433333                           |         |   |    |                    |                |
| chr28                                          | 9641432 | 2 | 34 | GAT:0.941176       | G:0.0588235    |
| chr28                                          | 9641446 | 4 | 40 | T:0.325            |                |
| TATATATATATGATGTCATATATATATGATGTCATC:0.225     |         |   |    |                    |                |
| TATATATATATATGATGTCATATATATATGATGTCATC:0.225   |         |   |    |                    |                |
| TATATATATATATATGATGTCATATATATATGATGTCATC:0.225 |         |   |    |                    |                |
| chr28                                          | 9641936 | 2 | 40 | A:1                | G:0            |
| chr28                                          | 9642104 | 2 | 40 | C:0.15             | G:0.85         |
| chr28                                          | 9642174 | 2 | 38 | G:0.131579         | T:0.868421     |
| chr28                                          | 9643130 | 2 | 36 | GA:1               | G:0            |
| chr28                                          | 9646093 | 2 | 40 | A:0.9              | G:0.1          |
| chr28                                          | 9646782 | 2 | 36 | C:0.0833333        | CT:0.916667    |
| chr28                                          | 9647574 | 2 | 40 | T:0.1              | TA:0.9         |
| chr28                                          | 9647680 | 3 | 40 | A:0.95             | AGTGTGTGT:0    |
| AGTGTGTGTGT:0.05                               |         |   |    |                    |                |
| chr28                                          | 9647845 | 2 | 36 | T:0.888889         | C:0.111111     |
| chr28                                          | 9648320 | 2 | 40 | G:1                | A:0            |
| chr28                                          | 9648412 | 2 | 38 | C:0.105263         | T:0.894737     |
| chr28                                          | 9648490 | 2 | 40 | C:1                | T:0            |

|          |         |   |    |              |                         |               |
|----------|---------|---|----|--------------|-------------------------|---------------|
| chr28    | 9648986 | 2 | 40 | A:0.95       | G:0.05                  |               |
| chr28    | 9649214 | 2 | 38 | A:0.105263   |                         | G:0.894737    |
| chr28    | 9649446 | 2 | 38 | A:0.894737   |                         | C:0.105263    |
| chr28    | 9649505 | 2 | 38 | A:0.868421   |                         | G:0.131579    |
| chr28    | 9650323 | 3 | 36 | G:0.111111   |                         | GTT:0.388889  |
| GTTT:0.5 |         |   |    |              |                         |               |
| chr28    | 9650634 | 2 | 40 | C:0.7        | A:0.3                   |               |
| chr28    | 9650639 | 2 | 40 | T:1          | C:0                     |               |
| chr28    | 9651038 | 2 | 38 | T:0.473684   |                         | C:0.526316    |
| chr28    | 9651083 | 2 | 38 | CTT:0.342105 |                         | C:0.657895    |
| chr28    | 9651369 | 2 | 38 | A:1          | G:0                     |               |
| chr28    | 9651668 | 2 | 38 | T:1          | C:0                     |               |
| chr28    | 9651680 | 2 | 40 | G:0.475      | A:0.525                 |               |
| chr28    | 9652019 | 2 | 40 | TGTC A:0.4   |                         | T:0.6         |
| chr28    | 9652056 | 2 | 40 | G:1          | C:0                     |               |
| chr28    | 9652957 | 2 | 40 | T:0.425      | C:0.575                 |               |
| chr28    | 9653028 | 2 | 38 | T:0.473684   |                         | C:0.526316    |
| chr28    | 9653703 | 2 | 40 | T:1          | C:0                     |               |
| chr28    | 9653750 | 2 | 34 | A:1          | G:0                     |               |
| chr28    | 9653818 | 2 | 38 | T:0.394737   |                         | TTAA:0.605263 |
| chr28    | 9654143 | 2 | 34 | A:0.705882   |                         | G:0.294118    |
| chr28    | 9654174 | 2 | 32 | C:0.6875     | T:0.3125                |               |
| chr28    | 9654445 | 2 | 32 | G:0.6875     | GC:0.3125               |               |
| chr28    | 9654971 | 2 | 38 | A:0.578947   |                         | G:0.421053    |
| chr28    | 9655006 | 2 | 38 | C:0.447368   |                         | T:0.552632    |
| chr28    | 9655026 | 2 | 38 | T:0.394737   |                         | C:0.605263    |
| chr28    | 9655278 | 2 | 40 | T:1          | TGAGTTACCCCTCACTG:0     |               |
| chr28    | 9655280 | 2 | 40 | A:0.525      | AGTTACCCCTCACTGGG:0.475 |               |
| chr28    | 9655689 | 2 | 40 | C:1          | T:0                     |               |
| chr28    | 9655751 | 2 | 38 | C:1          | T:0                     |               |
| chr28    | 9655846 | 2 | 38 | G:0.973684   |                         | A:0.0263158   |
| chr28    | 9656111 | 2 | 36 | A:1          | G:0                     |               |
| chr28    | 9656180 | 2 | 36 | T:0.416667   |                         | G:0.583333    |
| chr28    | 9656183 | 2 | 36 | C:0.416667   |                         | CA:0.583333   |
| chr28    | 9656400 | 2 | 38 | G:0.473684   |                         | A:0.526316    |
| chr28    | 9656541 | 2 | 40 | A:0.275      | C:0.725                 |               |
| chr28    | 9656548 | 2 | 40 | G:0.325      | A:0.675                 |               |
| chr28    | 9656876 | 2 | 32 | A:0.40625    |                         | T:0.59375     |
| chr28    | 9657139 | 2 | 30 | T:0.633333   |                         | C:0.366667    |
| chr28    | 9657309 | 2 | 36 | GT:1         | G:0                     |               |
| chr28    | 9657397 | 2 | 38 | G:1          | A:0                     |               |
| chr28    | 9657624 | 2 | 34 | T:0.176471   |                         | A:0.823529    |
| chr28    | 9657795 | 2 | 32 | C:1          | A:0                     |               |
| chr28    | 9657904 | 2 | 36 | G:1          | A:0                     |               |
| chr28    | 9657940 | 2 | 34 | A:0.647059   |                         | AGCATGCAGT:   |
| 0.352941 |         |   |    |              |                         |               |
| chr28    | 9658171 | 2 | 40 | TC:1         | T:0                     |               |
| chr28    | 9658397 | 2 | 40 | T:0.55       | C:0.45                  |               |
| chr28    | 9658782 | 2 | 38 | C:1          | T:0                     |               |
| chr28    | 9658807 | 2 | 40 | A:0.55       | T:0.45                  |               |
| chr28    | 9659055 | 2 | 36 | A:0.611111   |                         | AGC:0.388889  |
| chr28    | 9659105 | 2 | 40 | T:0.6        | TGCTTCCGCTGTGT CAG:0.4  |               |
| chr28    | 9659176 | 2 | 36 | G:0.388889   |                         | GA:0.611111   |
| chr28    | 9659199 | 2 | 40 | A:0.4        | G:0.6                   |               |



|       |         |   |    |            |         |             |
|-------|---------|---|----|------------|---------|-------------|
| chr28 | 9659205 | 2 | 40 | G:0.4      | A:0.6   |             |
| chr28 | 9659489 | 2 | 40 | CAA:1      | C:0     |             |
| chr28 | 9659589 | 2 | 38 | C:0.526316 |         | T:0.473684  |
| chr28 | 9659647 | 2 | 34 | T:0.352941 |         | C:0.647059  |
| chr28 | 9659741 | 2 | 38 | G:1        | A:0     |             |
| chr28 | 9659752 | 2 | 38 | T:1        | A:0     |             |
| chr28 | 9659891 | 2 | 36 | G:1        | GC:0    |             |
| chr28 | 9660193 | 2 | 34 | G:1        | T:0     |             |
| chr28 | 9660414 | 2 | 36 | C:1        | T:0     |             |
| chr28 | 9660529 | 2 | 36 | C:1        | T:0     |             |
| chr28 | 9660628 | 2 | 40 | T:1        | G:0     |             |
| chr28 | 9660887 | 2 | 40 | T:0.525    | C:0.475 |             |
| chr28 | 9661344 | 2 | 40 | G:1        | T:0     |             |
| chr28 | 9661812 | 2 | 36 | C:0.611111 |         | G:0.388889  |
| chr28 | 9661982 | 2 | 40 | TAA:0.35   | T:0.65  |             |
| chr28 | 9661983 | 2 | 40 | A:1        | T:0     |             |
| chr28 | 9662011 | 2 | 40 | C:1        | CAG:0   |             |
| chr28 | 9662101 | 2 | 40 | A:0.65     | T:0.35  |             |
| chr28 | 9662113 | 2 | 40 | C:1        | T:0     |             |
| chr28 | 9662146 | 2 | 38 | T:0.657895 |         | C:0.342105  |
| chr28 | 9662157 | 2 | 38 | G:0.684211 |         | A:0.315789  |
| chr28 | 9662260 | 2 | 38 | C:1        | T:0     |             |
| chr28 | 9662584 | 2 | 40 | A:0.475    | T:0.525 |             |
| chr28 | 9662786 | 2 | 38 | T:0.368421 |         | C:0.631579  |
| chr28 | 9662830 | 2 | 38 | C:1        | T:0     |             |
| chr28 | 9663399 | 2 | 38 | C:1        | T:0     |             |
| chr28 | 9663510 | 2 | 34 | A:0.411765 |         | G:0.588235  |
| chr28 | 9663899 | 2 | 38 | G:0.605263 |         | A:0.394737  |
| chr28 | 9664071 | 2 | 38 | T:0.342105 |         | C:0.657895  |
| chr28 | 9664231 | 2 | 36 | T:1        | A:0     |             |
| chr28 | 9664387 | 2 | 40 | G:1        | A:0     |             |
| chr28 | 9664447 | 2 | 38 | G:0.5      | A:0.5   |             |
| chr28 | 9664638 | 2 | 40 | A:0.45     | G:0.55  |             |
| chr28 | 9665033 | 2 | 36 | T:0.416667 |         | C:0.583333  |
| chr28 | 9665243 | 2 | 40 | G:1        | A:0     |             |
| chr28 | 9665256 | 2 | 40 | C:1        | G:0     |             |
| chr28 | 9665461 | 2 | 38 | G:0.605263 |         | A:0.394737  |
| chr28 | 9665513 | 2 | 36 | C:1        | T:0     |             |
| chr28 | 9666121 | 2 | 38 | A:0.447368 |         | T:0.552632  |
| chr28 | 9666214 | 2 | 40 | G:1        | A:0     |             |
| chr28 | 9666242 | 2 | 38 | A:0.447368 |         | G:0.552632  |
| chr28 | 9666302 | 2 | 38 | T:0.368421 |         | G:0.631579  |
| chr28 | 9666472 | 2 | 38 | G:0.447368 |         | C:0.552632  |
| chr28 | 9666500 | 2 | 36 | G:1        | A:0     |             |
| chr28 | 9666626 | 2 | 34 | C:0.705882 |         | CT:0.294118 |
| chr28 | 9666723 | 2 | 38 | C:1        | T:0     |             |
| chr28 | 9666783 | 2 | 38 | C:1        | G:0     |             |
| chr28 | 9666948 | 2 | 38 | G:0.605263 |         | T:0.394737  |
| chr28 | 9667079 | 2 | 40 | T:1        | C:0     |             |
| chr28 | 9667086 | 2 | 40 | C:1        | CCG:0   |             |
| chr28 | 9667231 | 2 | 36 | C:0.666667 |         | A:0.333333  |
| chr28 | 9667505 | 2 | 38 | C:0.657895 |         | T:0.342105  |
| chr28 | 9667701 | 2 | 36 | C:1        | T:0     |             |
| chr28 | 9667996 | 2 | 40 | A:0.55     | G:0.45  |             |

|                 |         |   |    |                   |                  |
|-----------------|---------|---|----|-------------------|------------------|
| chr28           | 9668104 | 2 | 38 | C:0.684211        | T:0.315789       |
| chr28           | 9668263 | 2 | 40 | A:0.425 G:0.575   |                  |
| chr28           | 9668410 | 2 | 38 | C:0 CA:1          |                  |
| chr28           | 9668421 | 2 | 38 | TG:0 T:1          |                  |
| chr28           | 9668423 | 2 | 38 | T:0 A:1           |                  |
| chr28           | 9668439 | 2 | 38 | C:1 T:0           |                  |
| chr28           | 9668995 | 2 | 38 | G:0.526316        | A:0.473684       |
| chr28           | 9669489 | 2 | 40 | G:0.375 A:0.625   |                  |
| chr28           | 9669533 | 2 | 40 | T:1 C:0           |                  |
| chr28           | 9669608 | 2 | 38 | T:1 C:0           |                  |
| chr28           | 9669803 | 2 | 36 | T:0.638889        | C:0.361111       |
| chr28           | 9669900 | 2 | 38 | T:0.631579        | TCC:0.368421     |
| chr28           | 9669906 | 3 | 38 | A:0.578947        | AAAAAC:0.0526316 |
| AAAAAC:0.368421 |         |   |    |                   |                  |
| chr28           | 9670366 | 2 | 36 | A:0 G:1           |                  |
| chr28           | 9671318 | 2 | 40 | G:0.4 A:0.6       |                  |
| chr28           | 9671397 | 2 | 38 | C:0.315789        | T:0.684211       |
| chr28           | 9671732 | 2 | 40 | A:0.45 G:0.55     |                  |
| chr28           | 9671764 | 2 | 40 | C:0.95 T:0.05     |                  |
| chr28           | 9671862 | 2 | 40 | T:0.425 C:0.575   |                  |
| chr28           | 9671913 | 2 | 40 | A:1 G:0           |                  |
| chr28           | 9671943 | 2 | 38 | A:0.5 ACTGT:0.5   |                  |
| chr28           | 9672157 | 2 | 40 | C:1 CT:0          |                  |
| chr28           | 9672165 | 2 | 40 | T:0.4 A:0.6       |                  |
| chr28           | 9672255 | 2 | 38 | T:0.5 G:0.5       |                  |
| chr28           | 9672418 | 2 | 36 | A:1 G:0           |                  |
| chr28           | 9672819 | 2 | 40 | C:1 CT:0          |                  |
| chr28           | 9672838 | 2 | 40 | C:0.625 T:0.375   |                  |
| chr28           | 9672902 | 2 | 36 | A:1 G:0           |                  |
| chr28           | 9672992 | 2 | 28 | T:0.642857        | C:0.357143       |
| chr28           | 9673011 | 2 | 28 | A:0.642857        | C:0.357143       |
| chr28           | 9673012 | 2 | 26 | T:0.730769        | C:0.269231       |
| chr28           | 9673119 | 2 | 22 | C:0.363636        | T:0.636364       |
| chr28           | 9673653 | 2 | 32 | CA:0.46875        | C:0.53125        |
| chr28           | 9673654 | 2 | 32 | A:0.8125 C:0.1875 |                  |
| chr28           | 9673757 | 2 | 40 | C:1 T:0           |                  |
| chr28           | 9674395 | 2 | 30 | C:0.9 T:0.1       |                  |
| chr28           | 9674746 | 2 | 38 | G:1 T:0           |                  |
| chr28           | 9674957 | 2 | 32 | T:0.59375         | TA:0.40625       |
| chr28           | 9675054 | 2 | 38 | G:1 GA:0          |                  |
| chr28           | 9675246 | 2 | 40 | C:0.425 CT:0.575  |                  |
| chr28           | 9675392 | 2 | 40 | G:1 A:0           |                  |
| chr28           | 9675737 | 2 | 40 | C:0.625 T:0.375   |                  |
| chr28           | 9676395 | 2 | 38 | C:1 T:0           |                  |
| chr28           | 9676547 | 2 | 38 | C:0.368421        | T:0.631579       |
| chr28           | 9676732 | 2 | 40 | G:0.425 A:0.575   |                  |
| chr28           | 9676832 | 2 | 40 | T:0.425 C:0.575   |                  |
| chr28           | 9677014 | 2 | 40 | A:0.475 G:0.525   |                  |
| chr28           | 9677144 | 2 | 38 | A:0.368421        | T:0.631579       |
| chr28           | 9677639 | 2 | 40 | A:0.4 ATTG:0.6    |                  |
| chr28           | 9677825 | 2 | 38 | G:0.631579        | A:0.368421       |
| chr28           | 9677987 | 2 | 40 | G:1 C:0           |                  |
| chr28           | 9678142 | 2 | 36 | A:0.583333        | C:0.416667       |
| chr28           | 9678350 | 2 | 38 | C:0.578947        | A:0.421053       |

|                                 |         |   |    |                       |                 |
|---------------------------------|---------|---|----|-----------------------|-----------------|
| chr28                           | 9678399 | 2 | 38 | G:0.578947            | A:0.421053      |
| chr28                           | 9678745 | 2 | 40 | G:0.975 T:0.025       |                 |
| chr28                           | 9679435 | 2 | 40 | A:0.325 G:0.675       |                 |
| chr28                           | 9679624 | 2 | 36 | A:0.944444            | C:0.0555556     |
| chr28                           | 9679710 | 2 | 40 | A:1 G:0               |                 |
| chr28                           | 9680298 | 2 | 38 | C:0.394737            | T:0.605263      |
| chr28                           | 9680322 | 2 | 38 | T:0.394737            | C:0.605263      |
| chr28                           | 9680453 | 2 | 38 | C:0.631579            | T:0.368421      |
| chr28                           | 9680576 | 2 | 38 | C:1 T:0               |                 |
| chr28                           | 9680940 | 2 | 38 | A:0.5 G:0.5           |                 |
| chr28                           | 9681149 | 2 | 38 | G:0.421053            | A:0.578947      |
| chr28                           | 9681230 | 2 | 40 | T:0.55 C:0.45         |                 |
| chr28                           | 9681350 | 2 | 36 | C:0.416667            | T:0.583333      |
| chr28                           | 9681525 | 2 | 40 | C:0.925 T:0.075       |                 |
| chr28                           | 9681616 | 2 | 36 | G:0.638889            | A:0.361111      |
| chr28                           | 9682796 | 2 | 36 | A:1 T:0               |                 |
| chr28                           | 9684073 | 2 | 40 | A:1 G:0               |                 |
| chr28                           | 9684650 | 2 | 38 | G:0.578947            | GTA:0.421053    |
| chr28                           | 9684944 | 2 | 38 | T:0.421053            | C:0.578947      |
| chr28                           | 9685059 | 2 | 40 | C:0.425 CCTCTCT:0.575 |                 |
| chr28                           | 9685108 | 4 | 40 | TAA:0.225             | T:0.35 TA:0.075 |
| TAAA:0.35                       |         |   |    |                       |                 |
| chr28                           | 9686194 | 2 | 40 | G:0.325 A:0.675       |                 |
| chr28                           | 9687510 | 2 | 38 | G:1 A:0               |                 |
| chr28                           | 9687764 | 2 | 40 | A:0.4 C:0.6           |                 |
| chr28                           | 9688323 | 2 | 40 | C:0.45 G:0.55         |                 |
| chr28                           | 9688775 | 2 | 38 | A:1 G:0               |                 |
| chr28                           | 9690095 | 2 | 40 | A:1 AAAT:0            |                 |
| chr28                           | 9690750 | 2 | 40 | C:1 CAG:0             |                 |
| chr28                           | 9691046 | 2 | 40 | T:1 TAA:0             |                 |
| chr28                           | 9691065 | 2 | 40 | AAAT:0.925            | A:0.075         |
| chr28                           | 9691066 | 2 | 40 | AAT:0.9 A:0.1         |                 |
| chr28                           | 9691068 | 3 | 40 | TAA:0.95 T:0          | TA:0.05         |
| chr28                           | 9691517 | 2 | 38 | T:1 A:0               |                 |
| chr28                           | 9692141 | 2 | 40 | A:1 T:0               |                 |
| chr28                           | 9692875 | 2 | 36 | C:1 T:0               |                 |
| chr28                           | 9693030 | 2 | 38 | C:1 CG:0              |                 |
| chr28                           | 9693291 | 2 | 38 | G:0.5 A:0.5           |                 |
| chr28                           | 9693366 | 2 | 34 | A:0.676471            | G:0.323529      |
| chr28                           | 9694301 | 3 | 40 | ACT:0.85 A:0.15       | ACTCT:0         |
| chr28                           | 9694803 | 2 | 36 | A:1 C:0               |                 |
| chr28                           | 9695387 | 2 | 26 | TGGGGG:0.192308       | T:0.807692      |
| chr28                           | 9696099 | 2 | 38 | G:0.552632            | T:0.447368      |
| chr28                           | 9696868 | 2 | 40 | T:1 C:0               |                 |
| chr28                           | 9696922 | 2 | 40 | C:1 T:0               |                 |
| chr28                           | 9697041 | 3 | 38 | A:0.210526            | ATTTCTTTC:      |
| 0.657895 ATTTCTTTCTTTC:0.131579 |         |   |    |                       |                 |
| chr28                           | 9697490 | 2 | 36 | G:0.972222            | A:0.0277778     |
| chr28                           | 9697717 | 2 | 38 | A:1 T:0               |                 |
| chr28                           | 9697967 | 2 | 34 | A:0.441176            | AT:0.558824     |
| chr28                           | 9698894 | 2 | 40 | CTTTTTTTTTTTTT:0.975  | C:0.025         |
| chr28                           | 9699500 | 3 | 40 | G:0.65 GTT:0.275      | GTTT:           |
| 0.075                           |         |   |    |                       |                 |
| chr28                           | 9701740 | 2 | 36 | G:1 T:0               |                 |

|                     |         |                            |    |                                  |                  |             |
|---------------------|---------|----------------------------|----|----------------------------------|------------------|-------------|
| chr28               | 9703418 | 2                          | 38 | C:0.578947                       | T:0.421053       |             |
| chr28               | 9703677 | 2                          | 40 | T:1                              | A:0              |             |
| chr28               | 9704056 | 2                          | 38 | T:1                              | C:0              |             |
| chr28               | 9704171 | 2                          | 40 | G:1                              | A:0              |             |
| chr28               | 9704381 | 2                          | 38 | C:1                              | T:0              |             |
| chr28               | 9704426 | 2                          | 40 | T:0.6                            | C:0.4            |             |
| chr28               | 9704625 | 2                          | 36 | C:1                              | T:0              |             |
| chr28               | 9704945 | 2                          | 36 | G:0.555556                       | A:0.444444       |             |
| chr28               | 9706082 | 2                          | 40 | T:0.4                            | C:0.6            |             |
| chr28               | 9706194 | 2                          | 38 | G:0.5                            | T:0.5            |             |
| chr28               | 9706698 | 2                          | 38 | C:0.578947                       | T:0.421053       |             |
| chr28               | 9707018 | 2                          | 40 | C:0.45                           | CAG:0.55         |             |
| chr28               | 9707475 | 2                          | 36 | T:0.527778                       | C:0.472222       |             |
| chr28               | 9708142 | 2                          | 40 | G:0.425                          | A:0.575          |             |
| chr28               | 9708223 | 4                          | 40 | TAATAAAATAAAATAA:0.125           | T:0.625          |             |
| TAATAAAATAA:0       |         | TAATAAAATAAAATAAAATAA:0.25 |    |                                  |                  |             |
| chr28               | 9710033 | 2                          | 36 | A:0.0833333                      | G:0.916667       |             |
| chr28               | 9710282 | 3                          | 40 | CATAGAT:0.725                    | C:0.1            |             |
| CATAGATATAGAT:0.175 |         |                            |    |                                  |                  |             |
| chr28               | 9710299 | 2                          | 40 | A:0.95                           | ATC:0.05         |             |
| chr28               | 9710301 | 2                          | 40 | A:0.95                           | AGATCTAGATC:0.05 |             |
| chr28               | 9710322 | 2                          | 40 | G:0.825                          | GATATAGAT:0.175  |             |
| chr28               | 9710326 | 2                          | 40 | G:0.95                           | T:0.05           |             |
| chr28               | 9710328 | 3                          | 40 | T:0.75                           | G:0.075          | TATAG:0.175 |
| chr28               | 9711031 | 2                          | 40 | AGTGT:0.5                        | A:0.5            |             |
| chr28               | 9711258 | 2                          | 34 | G:1                              | A:0              |             |
| chr28               | 9712579 | 2                          | 38 | T:0.894737                       | TA:0.105263      |             |
| chr28               | 9713224 | 2                          | 38 | C:1                              | G:0              |             |
| chr28               | 9713970 | 2                          | 38 | A:0.447368                       | G:0.552632       |             |
| chr28               | 9714649 | 2                          | 40 | CAATTTAATTACTTCAATTAATAAAAA:0.05 |                  |             |
| C:0.95              |         |                            |    |                                  |                  |             |
| chr28               | 9714674 | 2                          | 40 | A:0.05                           | AGG:0.95         |             |
| chr28               | 9715061 | 2                          | 40 | T:0.9                            | TA:0.1           |             |
| chr28               | 9715135 | 2                          | 40 | T:1                              | A:0              |             |
| chr28               | 9715311 | 2                          | 38 | C:1                              | T:0              |             |
| chr28               | 9715329 | 3                          | 38 | TA:0.868421                      | T:0.105263       |             |
| TAA:0.0263158       |         |                            |    |                                  |                  |             |
| chr28               | 9715348 | 2                          | 40 | T:0.65                           | C:0.35           |             |
| chr28               | 9715604 | 2                          | 38 | G:0.657895                       | T:0.342105       |             |
| chr28               | 9716009 | 2                          | 36 | G:0.416667                       | A:0.583333       |             |
| chr28               | 9716417 | 2                          | 38 | CT:0.447368                      | C:0.552632       |             |
| chr28               | 9717522 | 2                          | 36 | G:1                              | A:0              |             |
| chr28               | 9717530 | 5                          | 40 | ATGTG:0.05                       | A:0.55           | ATG:0       |
| ATGTGTGTGTG:0.15    |         | ATGTGTGTGTGTG:0.25         |    |                                  |                  |             |
| chr28               | 9717732 | 2                          | 38 | C:1                              | T:0              |             |
| chr28               | 9717766 | 2                          | 38 | ACT:0.684211                     | A:0.315789       |             |
| chr28               | 9718146 | 2                          | 38 | T:0.447368                       | C:0.552632       |             |
| chr28               | 9718514 | 2                          | 40 | A:0.525                          | G:0.475          |             |
| chr28               | 9718616 | 2                          | 40 | TA:0.725                         | T:0.275          |             |
| chr28               | 9718710 | 2                          | 38 | A:0.657895                       | C:0.342105       |             |
| chr28               | 9719127 | 2                          | 40 | G:0.4                            | T:0.6            |             |
| chr28               | 9719292 | 2                          | 38 | C:0.578947                       | T:0.421053       |             |
| chr28               | 9719408 | 2                          | 38 | G:1                              | A:0              |             |
| chr28               | 9719755 | 2                          | 40 | A:0.45                           | C:0.55           |             |

|       |         |                 |    |                  |         |                |
|-------|---------|-----------------|----|------------------|---------|----------------|
| chr28 | 9720134 | 2               | 40 | C:1              | T:0     |                |
| chr28 | 9721639 | 2               | 38 | T:0.526316       |         | C:0.473684     |
| chr28 | 9721686 | 2               | 40 | C:0.95           | T:0.05  |                |
| chr28 | 9721729 | 2               | 38 | C:0.5            | T:0.5   |                |
| chr28 | 9722300 | 2               | 38 | C:0.605263       |         | T:0.394737     |
| chr28 | 9722335 | 2               | 36 | C:0.444444       |         | T:0.555556     |
| chr28 | 9722472 | 2               | 40 | G:1              | A:0     |                |
| chr28 | 9722667 | 2               | 38 | A:0.421053       |         | C:0.578947     |
| chr28 | 9722668 | 2               | 38 | GT:0.5           | G:0.5   |                |
| chr28 | 9722959 | 2               | 38 | C:1              | T:0     |                |
| chr28 | 9723206 | 2               | 32 | A:1              | G:0     |                |
| chr28 | 9723630 | 2               | 40 | G:0.625          | A:0.375 |                |
| chr28 | 9723919 | 2               | 40 | C:0.475          | G:0.525 |                |
| chr28 | 9723997 | 2               | 38 | G:0.263158       |         | A:0.736842     |
| chr28 | 9724006 | 2               | 38 | A:1              | G:0     |                |
| chr28 | 9724574 | 2               | 38 | G:0.921053       |         | C:0.0789474    |
| chr28 | 9724633 | 2               | 36 | T:1              | C:0     |                |
| chr28 | 9724744 | 2               | 40 | C:1              | T:0     |                |
| chr28 | 9724827 | 2               | 40 | A:1              | G:0     |                |
| chr28 | 9724894 | 2               | 40 | T:1              | C:0     |                |
| chr28 | 9724895 | 2               | 40 | T:1              | C:0     |                |
| chr28 | 9725235 | 2               | 40 | A:1              | AC:0    |                |
| chr28 | 9725236 | 2               | 40 | A:1              | T:0     |                |
| chr28 | 9725255 | 2               | 40 | T:1              | C:0     |                |
| chr28 | 9725275 | 2               | 40 | T:1              | C:0     |                |
| chr28 | 9725447 | 2               | 38 | T:1              | G:0     |                |
| chr28 | 9725570 | 2               | 36 | G:0.222222       |         | A:0.777778     |
| chr28 | 9725663 | 2               | 38 | G:1              | A:0     |                |
| chr28 | 9725823 | 2               | 38 | T:1              | C:0     |                |
| chr28 | 9725868 | 2               | 40 | TG:0.45          | T:0.55  |                |
| chr28 | 9725883 | 2               | 38 | A:1              | C:0     |                |
| chr28 | 9725982 | 2               | 40 | T:1              | C:0     |                |
| chr28 | 9726140 | 2               | 40 | CT:0.95          | C:0.05  |                |
| chr28 | 9726488 | 2               | 38 | T:1              | C:0     |                |
| chr28 | 9726505 | 2               | 38 | TA:0.631579      |         | T:0.368421     |
| chr28 | 9727078 | 2               | 38 | T:0.552632       |         | C:0.447368     |
| chr28 | 9727823 | 2               | 36 | C:1              | T:0     |                |
| chr28 | 9727831 | 2               | 38 | AAAACGT:0.342105 |         | A:0.657895     |
| chr28 | 9728288 | 2               | 40 | T:0.425          | C:0.575 |                |
| chr28 | 9728361 | 2               | 40 | A:0.95           | T:0.05  |                |
| chr28 | 9728491 | 2               | 38 | T:0.5            | G:0.5   |                |
| chr28 | 9729023 | 2               | 40 | G:0.375          | A:0.625 |                |
| chr28 | 9729591 | 4               | 40 | TAATGAATG:0.525  |         | T:0.225 TAATG: |
|       | 0.25    | TAATGAATGAATG:0 |    |                  |         |                |
| chr28 | 9730419 | 2               | 38 | T:0.5            | A:0.5   |                |
| chr28 | 9730820 | 2               | 36 | T:0.0555556      |         | C:0.944444     |
| chr28 | 9730882 | 2               | 38 | T:0.947368       |         | C:0.0526316    |
| chr28 | 9731081 | 2               | 38 | C:0.421053       |         | T:0.578947     |
| chr28 | 9731210 | 2               | 40 | A:1              | AT:0    |                |
| chr28 | 9731212 | 2               | 40 | A:1              | T:0     |                |
| chr28 | 9731223 | 2               | 38 | GAT:0.526316     |         | G:0.473684     |
| chr28 | 9731276 | 2               | 40 | C:0.45           | T:0.55  |                |
| chr28 | 9731289 | 2               | 40 | T:0.45           | G:0.55  |                |
| chr28 | 9731315 | 2               | 40 | CAAT:0.425       |         | C:0.575        |

|       |         |   |    |                                 |                            |
|-------|---------|---|----|---------------------------------|----------------------------|
| chr28 | 9731461 | 2 | 38 | C:0.368421                      | T:0.631579                 |
| chr28 | 9731643 | 2 | 40 | A:0.55 G:0.45                   |                            |
| chr28 | 9731646 | 2 | 40 | G:1 A:0                         |                            |
| chr28 | 9732250 | 2 | 40 | C:0.75 G:0.25                   |                            |
| chr28 | 9732289 | 2 | 40 | TCC:0.5 T:0.5                   |                            |
| chr28 | 9732713 | 2 | 36 | A:0.416667                      | C:0.583333                 |
| chr28 | 9732824 | 2 | 40 | C:0.975 CTATATATATAACTATA:0.025 |                            |
| chr28 | 9733050 | 2 | 40 | C:0.95 T:0.05                   |                            |
| chr28 | 9733070 | 2 | 40 | A:0.475 G:0.525                 |                            |
| chr28 | 9733084 | 2 | 40 | C:0.95 T:0.05                   |                            |
| chr28 | 9733147 | 2 | 38 | T:0.947368                      | A:0.0526316                |
| chr28 | 9733150 | 2 | 38 | C:0.947368                      | T:0.0526316                |
| chr28 | 9733564 | 2 | 36 | G:0.472222                      | A:0.527778                 |
| chr28 | 9733818 | 2 | 38 | CAGAA:0.447368                  | C:0.552632                 |
| chr28 | 9733823 | 2 | 38 | A:0.447368                      | C:0.552632                 |
| chr28 | 9733861 | 2 | 34 | A:1 G:0                         |                            |
| chr28 | 9734028 | 2 | 38 | T:0.473684                      | C:0.526316                 |
| chr28 | 9734239 | 2 | 40 | T:0.125 C:0.875                 |                            |
| chr28 | 9734628 | 3 | 38 | G:0.184211                      | GTC:0.5 GTCTC:<br>0.315789 |
| chr28 | 9734706 | 2 | 38 | A:0.368421                      | T:0.631579                 |
| chr28 | 9734721 | 3 | 38 | CAA:0.289474                    | C:0.631579                 |
|       |         |   |    | CAAA:0.0789474                  |                            |
| chr28 | 9734868 | 2 | 38 | G:0.710526                      | C:0.289474                 |
| chr28 | 9736579 | 2 | 38 | A:0.684211                      | G:0.315789                 |
| chr28 | 9736608 | 2 | 34 | A:1 T:0                         |                            |
| chr28 | 9736672 | 2 | 34 | T:0.676471                      | TAAG:0.323529              |
| chr28 | 9736841 | 2 | 38 | A:0.315789                      | G:0.684211                 |
| chr28 | 9737006 | 4 | 40 | A:0.225 ATG:0.2                 |                            |
|       |         |   |    | ATGTGTGTGTGTGTGTG:0.275         | ATGTGTGTGTGTGTGTG:0.3      |
| chr28 | 9737028 | 2 | 38 | A:0.368421                      | ATT:0.631579               |
| chr28 | 9737409 | 2 | 40 | T:0.325 C:0.675                 |                            |
| chr28 | 9737548 | 3 | 38 | GT:0.184211                     | G:0.736842                 |
|       |         |   |    | GTT:0.0789474                   |                            |
| chr28 | 9737645 | 2 | 32 | A:0.375 C:0.625                 |                            |
| chr28 | 9737667 | 2 | 38 | C:0.657895                      | T:0.342105                 |
| chr28 | 9737805 | 2 | 40 | A:0.3 G:0.7                     |                            |
| chr28 | 9737930 | 2 | 40 | T:0.775 C:0.225                 |                            |
| chr28 | 9738289 | 2 | 38 | CA:0.921053                     | C:0.0789474                |
| chr28 | 9738986 | 2 | 36 | T:0.972222                      | C:0.0277778                |
| chr28 | 9739027 | 2 | 34 | G:0.764706                      | A:0.235294                 |
| chr28 | 9739349 | 2 | 38 | G:0.710526                      | A:0.289474                 |
| chr28 | 9739370 | 2 | 38 | T:0.710526                      | C:0.289474                 |
| chr28 | 9739420 | 2 | 40 | C:0.65 T:0.35                   |                            |
| chr28 | 9739441 | 2 | 40 | T:0.65 C:0.35                   |                            |
| chr28 | 9739464 | 2 | 40 | T:0.65 C:0.35                   |                            |
| chr28 | 9739475 | 2 | 40 | G:0.65 A:0.35                   |                            |
| chr28 | 9739585 | 2 | 40 | C:0.675 T:0.325                 |                            |
| chr28 | 9739593 | 2 | 40 | G:1 A:0                         |                            |
| chr28 | 9739661 | 2 | 40 | C:0.6 T:0.4                     |                            |
| chr28 | 9739683 | 2 | 38 | G:0.736842                      | T:0.263158                 |
| chr28 | 9739715 | 3 | 40 | A:0.95 C:0.05                   | T:0                        |
| chr28 | 9739815 | 2 | 40 | G:0.75 A:0.25                   |                            |
| chr28 | 9739860 | 2 | 38 | C:0.763158                      | T:0.236842                 |

|                    |                    |   |    |                            |                |
|--------------------|--------------------|---|----|----------------------------|----------------|
| chr28              | 9739865            | 2 | 38 | C:0.763158                 | G:0.236842     |
| chr28              | 9739866            | 2 | 38 | A:0.947368                 | G:0.0526316    |
| chr28              | 9739947            | 2 | 40 | G:0.675 C:0.325            |                |
| chr28              | 9740055            | 2 | 38 | G:0.0526316                | A:0.947368     |
| chr28              | 9740120            | 2 | 38 | C:0.815789                 | T:0.184211     |
| chr28              | 9740234            | 2 | 38 | G:0.394737                 | A:0.605263     |
| chr28              | 9740295            | 2 | 38 | C:1 T:0                    |                |
| chr28              | 9740534            | 2 | 38 | G:1 A:0                    |                |
| chr28              | 9740867            | 2 | 40 | G:0.4 A:0.6                |                |
| chr28              | 9740886            | 2 | 40 | C:0.65 T:0.35              |                |
| chr28              | 9740999            | 2 | 40 | CT:1 C:0                   |                |
| chr28              | 9741008            | 4 | 40 | GT:0.05 G:0.65             | GTT:0.3 GTTT:0 |
| chr28              | 9741185            | 2 | 38 | TCTC:0.736842              | T:0.263158     |
| chr28              | 9741427            | 2 | 40 | TTC:0.7 T:0.3              |                |
| chr28              | 9741441            | 2 | 40 | T:0.7 C:0.3                |                |
| chr28              | 9741450            | 2 | 40 | T:0.7 C:0.3                |                |
| chr28              | 9741626            | 2 | 40 | A:0.7 C:0.3                |                |
| chr28              | 9741663            | 2 | 40 | G:0.475 A:0.525            |                |
| chr28              | 9741924            | 2 | 40 | G:0.725 A:0.275            |                |
| chr28              | 9741942            | 2 | 40 | AATTG:1 A:0                |                |
| chr28              | 9742027            | 2 | 34 | T:0.0588235                | C:0.941176     |
| chr28              | 9742045            | 2 | 34 | C:0.764706                 | T:0.235294     |
| chr28              | 9742095            | 2 | 38 | A:0.736842                 | AT:0.263158    |
| chr28              | 9742175            | 2 | 40 | G:0.05 A:0.95              |                |
| chr28              | 9742286            | 2 | 40 | C:0.675 T:0.325            |                |
| chr28              | 9742324            | 2 | 40 | C:0.725 T:0.275            |                |
| chr28              | 9742332            | 2 | 40 | A:0.625 G:0.375            |                |
| chr28              | 9742394            | 2 | 40 | G:0.675 A:0.325            |                |
| chr28              | 9742571            | 2 | 38 | G:0.947368                 | A:0.0526316    |
| chr28              | 9742760            | 2 | 40 | T:0.65 G:0.35              |                |
| chr28              | 9742857            | 2 | 36 | G:0.75 C:0.25              |                |
| chr28              | 9743064            | 2 | 40 | T:0.7 A:0.3                |                |
| chr28              | 9743116            | 2 | 36 | T:0.722222                 | TA:0.277778    |
| chr28              | 9743160            | 2 | 38 | C:0.710526                 | A:0.289474     |
| chr28              | 9743176            | 2 | 38 | A:0.736842                 | C:0.263158     |
| chr28              | 9743185            | 2 | 38 | G:0.631579                 | A:0.368421     |
| chr28              | 9743202            | 2 | 38 | A:0.736842                 | G:0.263158     |
| chr28              | 9743328            | 2 | 40 | T:0.7 C:0.3                |                |
| chr28              | 9743590            | 2 | 40 | G:0.875 GGGAT:0.125        |                |
| chr28              | 9743591            | 4 | 40 | GGATAGATA:0.825 G:0 GGATA: |                |
| 0.125              | GGATAGATAGATA:0.05 |   |    |                            |                |
| chr28              | 9743595            | 2 | 38 | A:1 G:0                    |                |
| chr28              | 9743634            | 3 | 40 | T:0.75 TAGATAG:0.05        |                |
| TGATAGATAGATAG:0.2 |                    |   |    |                            |                |
| chr28              | 9743837            | 2 | 40 | G:1 C:0                    |                |
| chr28              | 9743838            | 2 | 40 | T:0.625 C:0.375            |                |
| chr28              | 9743960            | 2 | 36 | A:0.277778                 | T:0.722222     |
| chr28              | 9744247            | 2 | 40 | C:0.6 A:0.4                |                |
| chr28              | 9744622            | 2 | 36 | A:0.666667                 | G:0.333333     |
| chr28              | 9744849            | 2 | 40 | G:0.675 A:0.325            |                |
| chr28              | 9745014            | 2 | 40 | G:0.675 T:0.325            |                |
| chr28              | 9745028            | 2 | 40 | T:1 TA:0                   |                |
| chr28              | 9745205            | 2 | 40 | C:1 T:0                    |                |
| chr28              | 9745251            | 2 | 38 | T:0.736842                 | C:0.263158     |

|            |                 |   |    |                        |                         |
|------------|-----------------|---|----|------------------------|-------------------------|
| chr28      | 9745261         | 2 | 38 | G:0.736842             | A:0.263158              |
| chr28      | 9745314         | 2 | 38 | G:1                    | A:0                     |
| chr28      | 9746163         | 2 | 40 | T:0.2                  | G:0.8                   |
| chr28      | 9746181         | 2 | 40 | C:0.175                | T:0.825                 |
| chr28      | 9746220         | 2 | 40 | C:0.2                  | T:0.8                   |
| chr28      | 9746611         | 2 | 40 | TC:1                   | T:0                     |
| chr28      | 9746612         | 2 | 40 | C:0.175                | T:0.825                 |
| chr28      | 9746758         | 2 | 40 | T:1                    | C:0                     |
| chr28      | 9747095         | 2 | 36 | T:1                    | TAC:0                   |
| chr28      | 9747240         | 2 | 40 | TC:1                   | T:0                     |
| chr28      | 9747525         | 2 | 40 | A:1                    | T:0                     |
| chr28      | 9747633         | 2 | 34 | C:1                    | T:0                     |
| chr28      | 9747866         | 2 | 38 | C:0.131579             | T:0.868421              |
| chr28      | 9747984         | 2 | 38 | A:0.0526316            | G:0.947368              |
| chr28      | 9748265         | 2 | 40 | G:1                    | A:0                     |
| chr28      | 9748530         | 2 | 36 | G:0.166667             | A:0.833333              |
| chr28      | 9749203         | 2 | 38 | A:1                    | G:0                     |
| chr28      | 9749315         | 2 | 34 | C:0.941176             | CT:0.0588235            |
| chr28      | 9749494         | 2 | 38 | A:0.210526             | G:0.789474              |
| chr28      | 9749795         | 2 | 38 | A:0.131579             | G:0.868421              |
| chr28      | 9749831         | 2 | 36 | GC:0.138889            | G:0.861111              |
| chr28      | 9750270         | 2 | 38 | G:1                    | C:0                     |
| chr28      | 9750347         | 2 | 40 | A:0.025                | C:0.975                 |
| chr28      | 9750948         | 2 | 38 | A:0.0526316            | G:0.947368              |
| chr28      | 9751061         | 2 | 34 | C:1                    | G:0                     |
| chr28      | 9751265         | 2 | 38 | C:1                    | T:0                     |
| chr28      | 9751372         | 2 | 36 | C:1                    | T:0                     |
| chr28      | 9751465         | 4 | 38 | AT:0.894737            | A:0 ATT:                |
| 0.0526316  | ATTTT:0.0526316 |   |    |                        |                         |
| chr28      | 9752140         | 3 | 36 | C:0.361111             | CTG:0.388889            |
| CTGTG:0.25 |                 |   |    |                        |                         |
| chr28      | 9752675         | 2 | 40 | G:1                    | A:0                     |
| chr28      | 9752676         | 2 | 40 | A:1                    | G:0                     |
| chr28      | 9753535         | 2 | 34 | C:0.205882             | A:0.794118              |
| chr28      | 9753816         | 2 | 36 | G:0.166667             | A:0.833333              |
| chr28      | 9754192         | 2 | 34 | T:0.882353             | C:0.117647              |
| chr28      | 9754329         | 2 | 38 | T:0.131579             | C:0.868421              |
| chr28      | 9754954         | 2 | 40 | T:1                    | TTTTTTA:0               |
| chr28      | 9754961         | 2 | 40 | A:1                    | ATTTATTTTTTTTTTAAATTT:0 |
| chr28      | 9755512         | 2 | 38 | G:0.947368             | A:0.0526316             |
| chr28      | 9755568         | 2 | 40 | C:0.15                 | A:0.85                  |
| chr28      | 9755764         | 2 | 38 | G:0.184211             | T:0.815789              |
| chr28      | 9755816         | 2 | 40 | A:0.15                 | G:0.85                  |
| chr28      | 9755909         | 2 | 40 | CAAATAATAATAATAATAA:1  | C:0                     |
| chr28      | 9755910         | 6 | 40 | AAATAATAATAATAAT:0.125 | A:0                     |
| AAAT:0     | AAATAAT:0.35    |   |    | AAATAATAAT:0.1         | AAATAATAATAAT:0.425     |
| chr28      | 9756064         | 2 | 36 | A:0.166667             | G:0.833333              |
| chr28      | 9756106         | 2 | 36 | C:0.222222             | G:0.777778              |
| chr28      | 9756139         | 2 | 40 | T:0.975                | TA:0.025                |
| chr28      | 9756756         | 2 | 38 | A:1                    | G:0                     |
| chr28      | 9756881         | 2 | 36 | A:0.166667             | G:0.833333              |
| chr28      | 9757016         | 2 | 40 | C:0.175                | G:0.825                 |
| chr28      | 9757207         | 2 | 40 | T:1                    | A:0                     |
| chr28      | 9757230         | 2 | 40 | C:0.95                 | T:0.05                  |



|                                |         |   |    |                               |               |
|--------------------------------|---------|---|----|-------------------------------|---------------|
| chr28                          | 9757270 | 2 | 40 | TCCTTCTCTCC:1                 | T:0           |
| chr28                          | 9757282 | 2 | 40 | T:1                           | G:0           |
| chr28                          | 9757346 | 2 | 40 | TTCTCTCCATAAGTAATGATC:1       | T:0           |
| chr28                          | 9757454 | 2 | 38 | C:0.0526316                   | T:0.947368    |
| chr28                          | 9757710 | 2 | 40 | A:1                           | G:0           |
| chr28                          | 9758156 | 2 | 36 | C:0.0833333                   | CTTTTTTTT:    |
| 0.916667                       |         |   |    |                               |               |
| chr28                          | 9758433 | 2 | 40 | TA:0.125                      | T:0.875       |
| chr28                          | 9758746 | 2 | 38 | T:0.184211                    | A:0.815789    |
| chr28                          | 9758811 | 2 | 36 | C:0.972222                    | T:0.0277778   |
| chr28                          | 9759090 | 2 | 38 | GA:1                          | G:0           |
| chr28                          | 9759127 | 2 | 40 | G:0.95                        | GAA:0.05      |
| chr28                          | 9759435 | 2 | 38 | G:0.947368                    | C:0.0526316   |
| chr28                          | 9759494 | 2 | 38 | T:0.0526316                   | TAA:0.947368  |
| chr28                          | 9759580 | 2 | 38 | C:0.947368                    | A:0.0526316   |
| chr28                          | 9759649 | 2 | 40 | T:0.95                        | C:0.05        |
| chr28                          | 9759874 | 2 | 40 | T:0.975                       | C:0.025       |
| chr28                          | 9759938 | 2 | 40 | A:0.125                       | G:0.875       |
| chr28                          | 9759994 | 2 | 38 | G:0.947368                    | A:0.0526316   |
| chr28                          | 9760373 | 2 | 40 | T:0.95                        | C:0.05        |
| chr28                          | 9760542 | 2 | 40 | G:0.95                        | A:0.05        |
| chr28                          | 9760660 | 2 | 38 | C:1                           | T:0           |
| chr28                          | 9761086 | 2 | 40 | GA:0.95                       | G:0.05        |
| chr28                          | 9761098 | 2 | 40 | A:1                           | C:0           |
| chr28                          | 9761245 | 2 | 38 | C:0.973684                    | CCT:0.0263158 |
| chr28                          | 9761552 | 2 | 38 | T:0.947368                    | G:0.0526316   |
| chr28                          | 9761728 | 2 | 40 | G:0.125                       | GT:0.875      |
| chr28                          | 9762479 | 2 | 38 | TG:0.921053                   | T:0.0789474   |
| chr28                          | 9762767 | 2 | 40 | AAG:1                         | A:0           |
| chr28                          | 9763333 | 2 | 38 | A:1                           | T:0           |
| chr28                          | 9763478 | 2 | 40 | C:0.025                       | T:0.975       |
| chr28                          | 9763486 | 2 | 40 | T:0.025                       | C:0.975       |
| chr28                          | 9764176 | 2 | 36 | C:0.0555556                   | G:0.944444    |
| chr28                          | 9764669 | 2 | 38 | G:0.0526316                   | C:0.947368    |
| chr28                          | 9764759 | 2 | 40 | G:1                           |               |
| GAAATACAGATGTCAAAAAAAAAAAAAA:0 |         |   |    |                               |               |
| chr28                          | 9765181 | 2 | 38 | C:0.947368                    | T:0.0526316   |
| chr28                          | 9765523 | 2 | 36 | T:0                           | G:1           |
| chr28                          | 9765634 | 2 | 36 | C:0.833333                    | G:0.166667    |
| chr28                          | 9765903 | 2 | 38 | C:1                           | T:0           |
| chr28                          | 9766373 | 2 | 34 | T:0.823529                    | C:0.176471    |
| chr28                          | 9766593 | 2 | 40 | GAGAAAGAAAAGAAGAAAGAAAGA:0.15 |               |
| G:0.85                         |         |   |    |                               |               |
| chr28                          | 9766676 | 2 | 36 | AAG:0.166667                  | A:0.833333    |
| chr28                          | 9766683 | 2 | 36 | G:0.166667                    | GA:0.833333   |
| chr28                          | 9766993 | 2 | 38 | G:0.105263                    | A:0.894737    |
| chr28                          | 9767153 | 2 | 40 | C:1                           | T:0           |
| chr28                          | 9767192 | 2 | 40 | T:0.95                        | C:0.05        |
| chr28                          | 9767386 | 2 | 40 | T:1                           | TTAGA:0       |
| chr28                          | 9767447 | 2 | 38 | T:0.105263                    | C:0.894737    |
| chr28                          | 9767480 | 2 | 38 | G:0.921053                    | C:0.0789474   |
| chr28                          | 9767673 | 2 | 36 | G:0.861111                    | A:0.138889    |
| chr28                          | 9768353 | 2 | 38 | A:0.131579                    | G:0.868421    |
| chr28                          | 9768697 | 2 | 40 | C:0.125                       | T:0.875       |

|       |         |   |    |                 |             |
|-------|---------|---|----|-----------------|-------------|
| chr28 | 9769049 | 2 | 40 | A:0.175         | AT:0.825    |
| chr28 | 9769050 | 2 | 40 | T:1             | TA:0        |
| chr28 | 9770759 | 2 | 38 | G:1             | C:0         |
| chr28 | 9771167 | 2 | 40 | C:0.5           | T:0.5       |
| chr28 | 9771342 | 2 | 40 | C:0.425         | T:0.575     |
| chr28 | 9771538 | 2 | 40 | T:0.475         | TA:0.525    |
| chr28 | 9771702 | 2 | 40 | C:0.425         | T:0.575     |
| chr28 | 9771730 | 2 | 40 | A:0.375         | G:0.625     |
| chr28 | 9772152 | 2 | 38 | G:0.447368      | T:0.552632  |
| chr28 | 9772348 | 2 | 40 | A:0.45          | G:0.55      |
| chr28 | 9772580 | 2 | 40 | A:0.575         | G:0.425     |
| chr28 | 9772908 | 2 | 40 | T:0.5           | C:0.5       |
| chr28 | 9772982 | 2 | 40 | ATG:0.475       | A:0.525     |
| chr28 | 9772985 | 2 | 40 | CCAGTGTAA:0.475 | C:0.525     |
| chr28 | 9773464 | 2 | 34 | C:0.411765      | T:0.588235  |
| chr28 | 9773787 | 2 | 38 | A:0.5           | G:0.5       |
| chr28 | 9773853 | 2 | 36 | A:0.611111      | G:0.388889  |
| chr28 | 9773867 | 2 | 38 | C:0.5           | T:0.5       |
| chr28 | 9774139 | 2 | 38 | G:0.947368      | A:0.0526316 |
| chr28 | 9774505 | 2 | 40 | A:0.525         | G:0.475     |
| chr28 | 9774726 | 2 | 36 | C:0.472222      | T:0.527778  |
| chr28 | 9774815 | 2 | 38 | C:0.973684      | T:0.0263158 |
| chr28 | 9775141 | 2 | 38 | G:0.552632      | A:0.447368  |
| chr28 | 9775184 | 2 | 38 | T:1             | TC:0        |
| chr28 | 9775707 | 2 | 40 | C:0.5           | T:0.5       |
| chr28 | 9775881 | 2 | 40 | G:0.525         | GAA:0.475   |
| chr28 | 9776378 | 2 | 38 | T:0.447368      | C:0.552632  |
| chr28 | 9776533 | 2 | 38 | C:0.631579      | T:0.368421  |
| chr28 | 9776550 | 2 | 40 | T:0.925         | TC:0.075    |
| chr28 | 9777051 | 2 | 40 | G:0.95          | A:0.05      |
| chr28 | 9777185 | 2 | 36 | G:0.527778      | C:0.472222  |
| chr28 | 9777308 | 2 | 36 | T:0.444444      | C:0.555556  |
| chr28 | 9777424 | 2 | 40 | T:0.525         | C:0.475     |
| chr28 | 9777623 | 2 | 38 | T:0.526316      | C:0.473684  |
| chr28 | 9777957 | 2 | 40 | C:1             | A:0         |
| chr28 | 9777990 | 2 | 40 | T:0.475         | A:0.525     |
| chr28 | 9778333 | 2 | 38 | C:0.947368      | T:0.0526316 |
| chr28 | 9778511 | 2 | 38 | C:0.447368      | T:0.552632  |
| chr28 | 9778650 | 2 | 40 | CT:0.5          | C:0.5       |
| chr28 | 9778713 | 2 | 40 | T:0.475         | G:0.525     |
| chr28 | 9779028 | 2 | 38 | A:0.552632      | G:0.447368  |
| chr28 | 9779184 | 2 | 38 | A:0.0789474     | G:0.921053  |
| chr28 | 9779188 | 2 | 40 | A:1             | G:0         |
| chr28 | 9779472 | 2 | 36 | C:1             | T:0         |
| chr28 | 9779502 | 2 | 38 | G:0.5           | A:0.5       |
| chr28 | 9779585 | 2 | 40 | G:1             | A:0         |
| chr28 | 9779744 | 2 | 38 | G:1             | A:0         |
| chr28 | 9779765 | 2 | 40 | C:0.475         | T:0.525     |
| chr28 | 9779849 | 2 | 40 | G:0.05          | C:0.95      |
| chr28 | 9779986 | 2 | 38 | C:1             | G:0         |
| chr28 | 9780107 | 2 | 38 | T:0.552632      | C:0.447368  |
| chr28 | 9780582 | 2 | 32 | GAAAA:0         | G:1         |
| chr28 | 9780586 | 2 | 32 | A:0             | AGGCGC:1    |
| chr28 | 9781109 | 2 | 28 | CT:0.5          | C:0.5       |

|       |         |   |    |                     |                |
|-------|---------|---|----|---------------------|----------------|
| chr28 | 9781370 | 2 | 38 | G:0.473684          | A:0.526316     |
| chr28 | 9781580 | 2 | 38 | T:0.263158          | C:0.736842     |
| chr28 | 9781610 | 2 | 34 | A:0.264706          | G:0.735294     |
| chr28 | 9781893 | 2 | 38 | C:0.473684          | T:0.526316     |
| chr28 | 9782443 | 2 | 40 | T:0.475 G:0.525     |                |
| chr28 | 9782499 | 2 | 34 | G:0.705882          | A:0.294118     |
| chr28 | 9782808 | 2 | 26 | A:0.807692          | T:0.192308     |
| chr28 | 9782809 | 2 | 26 | C:0.807692          | A:0.192308     |
| chr28 | 9782819 | 2 | 20 | G:0.65 T:0.35       |                |
| chr28 | 9782979 | 2 | 32 | C:0.71875           | T:0.28125      |
| chr28 | 9783183 | 2 | 36 | C:0 G:1             |                |
| chr28 | 9783199 | 2 | 36 | T:0.833333          | C:0.166667     |
| chr28 | 9783448 | 2 | 36 | T:0.527778          | C:0.472222     |
| chr28 | 9783582 | 2 | 38 | C:0.736842          | A:0.263158     |
| chr28 | 9783784 | 2 | 40 | A:0.75 G:0.25       |                |
| chr28 | 9783843 | 2 | 40 | G:0.25 T:0.75       |                |
| chr28 | 9783881 | 2 | 40 | T:0.225 G:0.775     |                |
| chr28 | 9784009 | 2 | 40 | G:0.2 C:0.8         |                |
| chr28 | 9784056 | 2 | 38 | G:0.552632          | A:0.447368     |
| chr28 | 9784260 | 2 | 36 | C:0.527778          | T:0.472222     |
| chr28 | 9784474 | 2 | 38 | T:0.631579          | C:0.368421     |
| chr28 | 9784506 | 2 | 38 | C:0.578947          | T:0.421053     |
| chr28 | 9784586 | 2 | 36 | C:1 G:0             |                |
| chr28 | 9784588 | 2 | 36 | G:0.472222          | A:0.527778     |
| chr28 | 9784622 | 2 | 36 | T:0.833333          | C:0.166667     |
| chr28 | 9784780 | 2 | 40 | T:0.65 G:0.35       |                |
| chr28 | 9785095 | 2 | 40 | C:0.7 A:0.3         |                |
| chr28 | 9785624 | 2 | 36 | C:0.75 T:0.25       |                |
| chr28 | 9785777 | 2 | 40 | T:0.75 C:0.25       |                |
| chr28 | 9785850 | 2 | 38 | G:0.736842          | A:0.263158     |
| chr28 | 9785965 | 2 | 38 | T:0.657895          | G:0.342105     |
| chr28 | 9786023 | 2 | 40 | G:1 A:0             |                |
| chr28 | 9786138 | 2 | 38 | A:0.736842          | G:0.263158     |
| chr28 | 9786603 | 2 | 40 | G:0.625 T:0.375     |                |
| chr28 | 9786794 | 2 | 38 | G:0.684211          | A:0.315789     |
| chr28 | 9786881 | 2 | 40 | C:0.65 T:0.35       |                |
| chr28 | 9786990 | 2 | 38 | C:0.526316          | T:0.473684     |
| chr28 | 9787175 | 2 | 38 | A:0.736842          | G:0.263158     |
| chr28 | 9787339 | 2 | 36 | C:0.694444          | T:0.305556     |
| chr28 | 9787422 | 2 | 34 | T:0.705882          | C:0.294118     |
| chr28 | 9787520 | 2 | 36 | T:0.777778          | G:0.222222     |
| chr28 | 9787968 | 2 | 40 | A:0.6 G:0.4         |                |
| chr28 | 9788045 | 2 | 38 | G:0.736842          | A:0.263158     |
| chr28 | 9788135 | 2 | 40 | T:0.75 A:0.25       |                |
| chr28 | 9788454 | 2 | 40 | G:0.725 A:0.275     |                |
| chr28 | 9788807 | 2 | 36 | G:0.75 A:0.25       |                |
| chr28 | 9788899 | 2 | 40 | T:0.7 A:0.3         |                |
| chr28 | 9789035 | 2 | 38 | CT:0.684211         | C:0.315789     |
| chr28 | 9789068 | 2 | 36 | C:0.722222          | CAAAT:0.277778 |
| chr28 | 9789180 | 2 | 40 | C:0.75 T:0.25       |                |
| chr28 | 9789612 | 2 | 40 | T:0.725 C:0.275     |                |
| chr28 | 9789645 | 2 | 40 | G:0.05 A:0.95       |                |
| chr28 | 9789859 | 2 | 36 | C:0.777778          | A:0.222222     |
| chr28 | 9790016 | 2 | 40 | T:0.775 TAGCC:0.225 |                |

|       |         |               |    |             |                          |
|-------|---------|---------------|----|-------------|--------------------------|
| chr28 | 9790026 | 2             | 36 | TA:0.944444 | T:0.0555556              |
| chr28 | 9790074 | 2             | 38 | C:0.763158  | T:0.236842               |
| chr28 | 9790405 | 2             | 36 | C:0.972222  | T:0.0277778              |
| chr28 | 9790419 | 2             | 36 | G:0.777778  | A:0.222222               |
| chr28 | 9790455 | 2             | 38 | T:0         | C:1                      |
| chr28 | 9790526 | 2             | 36 | A:0.694444  | G:0.305556               |
| chr28 | 9790662 | 2             | 36 | C:0.75      | T:0.25                   |
| chr28 | 9791240 | 2             | 40 | A:0.725     | AAG:0.275                |
| chr28 | 9791601 | 2             | 38 | G:0.736842  | A:0.263158               |
| chr28 | 9791611 | 2             | 38 | C:0.736842  | T:0.263158               |
| chr28 | 9792278 | 2             | 40 | T:0.3       | TA:0.7                   |
| chr28 | 9792359 | 2             | 38 | G:0.710526  | T:0.289474               |
| chr28 | 9792736 | 2             | 40 | C:0.875     | T:0.125                  |
| chr28 | 9792838 | 2             | 36 | G:0.75      | C:0.25                   |
| chr28 | 9792888 | 2             | 40 | AC:0.775    | A:0.225                  |
| chr28 | 9793291 | 2             | 38 | G:0.947368  | A:0.0526316              |
| chr28 | 9793351 | 2             | 40 | C:1         | T:0                      |
| chr28 | 9793488 | 2             | 38 | G:1         | A:0                      |
| chr28 | 9793596 | 2             | 40 | C:0.725     | T:0.275                  |
| chr28 | 9793667 | 2             | 40 | G:0.675     | A:0.325                  |
| chr28 | 9793740 | 2             | 40 | G:0.775     | T:0.225                  |
| chr28 | 9793897 | 2             | 38 | G:0.815789  | A:0.184211               |
| chr28 | 9793969 | 2             | 40 | A:0.7       | G:0.3                    |
| chr28 | 9793999 | 2             | 32 | G:0.59375   | GA:0.40625               |
| chr28 | 9794014 | 2             | 34 | AT:0.735294 | A:0.264706               |
| chr28 | 9794053 | 2             | 40 | A:0.7       | G:0.3                    |
| chr28 | 9794505 | 2             | 38 | A:1         | G:0                      |
| chr28 | 9794625 | 2             | 38 | A:1         | G:0                      |
| chr28 | 9795001 | 2             | 38 | C:1         | T:0                      |
| chr28 | 9795058 | 2             | 34 | C:0.705882  | G:0.294118               |
| chr28 | 9795444 | 2             | 40 | A:0         | G:1                      |
| chr28 | 9795515 | 2             | 40 | T:0         | C:1                      |
| chr28 | 9795678 | 2             | 40 | A:0.75      | G:0.25                   |
| chr28 | 9795826 | 2             | 40 | CT:1        | C:0                      |
| chr28 | 9795946 | 2             | 40 | A:0         | G:1                      |
| chr28 | 9795986 | 2             | 40 | T:1         | C:0                      |
| chr28 | 9796648 | 2             | 36 | C:0         | T:1                      |
| chr28 | 9796896 | 2             | 38 | T:0.657895  | C:0.342105               |
| chr28 | 9797057 | 2             | 36 | C:0.527778  | A:0.472222               |
| chr28 | 9797235 | 2             | 40 | T:1         | C:0                      |
| chr28 | 9797265 | 2             | 38 | T:0.631579  | C:0.368421               |
| chr28 | 9797266 | 2             | 40 | G:0.65      | A:0.35                   |
| chr28 | 9797282 | 2             | 40 | C:0.95      | T:0.05                   |
| chr28 | 9797798 | 2             | 40 | G:1         | A:0                      |
| chr28 | 9798027 | 2             | 40 | C:0.475     | T:0.525                  |
| chr28 | 9798108 | 2             | 38 | G:1         | A:0                      |
| chr28 | 9798234 | 2             | 40 | T:1         | C:0                      |
| chr28 | 9800437 | 2             | 38 | A:0         | G:1                      |
| chr28 | 9800547 | 5             | 40 | C:0.075     | CA:0.175 CAA:0.1 CAAAAA: |
|       | 0.375   | CAAAAAA:0.275 |    |             |                          |
| chr28 | 9801138 | 2             | 38 | C:1         | T:0                      |
| chr28 | 9801139 | 2             | 38 | A:1         | G:0                      |
| chr28 | 9801402 | 2             | 36 | G:1         | T:0                      |
| chr28 | 9801683 | 2             | 40 | C:0.95      | T:0.05                   |

|                     |         |   |    |                     |               |                 |
|---------------------|---------|---|----|---------------------|---------------|-----------------|
| chr28               | 9802136 | 2 | 40 | C:1                 | G:0           |                 |
| chr28               | 9802306 | 2 | 38 | C:1                 | T:0           |                 |
| chr28               | 9802363 | 4 | 38 | C:0                 | CA:0          | CAAAA:0.289474  |
| CAAAA:0.710526      |         |   |    |                     |               |                 |
| chr28               | 9802788 | 2 | 40 | G:0                 | A:1           |                 |
| chr28               | 9802920 | 3 | 40 | GAA:0.075           |               | G:0.15 GA:0.775 |
| chr28               | 9803120 | 2 | 40 | C:0.75              | T:0.25        |                 |
| chr28               | 9803834 | 2 | 38 | G:0.736842          |               | A:0.263158      |
| chr28               | 9803869 | 2 | 40 | G:0.675             | A:0.325       |                 |
| chr28               | 9804295 | 2 | 38 | G:0.684211          |               | A:0.315789      |
| chr28               | 9804465 | 2 | 38 | T:0.710526          |               | C:0.289474      |
| chr28               | 9804556 | 2 | 40 | T:0.675             | TA:0.325      |                 |
| chr28               | 9804561 | 2 | 40 | T:0.675             | C:0.325       |                 |
| chr28               | 9804876 | 2 | 40 | C:0.675             | T:0.325       |                 |
| chr28               | 9805551 | 2 | 40 | T:0.6               | C:0.4         |                 |
| chr28               | 9805552 | 2 | 40 | G:0.6               | C:0.4         |                 |
| chr28               | 9805581 | 2 | 40 | A:0                 | ACT:1         |                 |
| chr28               | 9806859 | 2 | 36 | A:1                 | G:0           |                 |
| chr28               | 9807002 | 4 | 40 | AAC:0.15            | A:0.2         | AACAC:0.3       |
| AACACACACACAC:0.35  |         |   |    |                     |               |                 |
| chr28               | 9807618 | 2 | 36 | A:0.444444          |               | G:0.555556      |
| chr28               | 9808169 | 2 | 38 | A:0.789474          |               | C:0.210526      |
| chr28               | 9808283 | 2 | 38 | A:0.289474          |               | G:0.710526      |
| chr28               | 9808530 | 2 | 40 | G:1                 | A:0           |                 |
| chr28               | 9809053 | 2 | 38 | G:0.473684          |               | A:0.526316      |
| chr28               | 9809286 | 2 | 40 | G:0.5               | T:0.5         |                 |
| chr28               | 9809566 | 2 | 34 | C:0.5               | T:0.5         |                 |
| chr28               | 9810156 | 2 | 40 | C:0.45              | G:0.55        |                 |
| chr28               | 9810157 | 2 | 40 | A:0                 | G:1           |                 |
| chr28               | 9810435 | 2 | 38 | G:0.578947          |               | A:0.421053      |
| chr28               | 9810671 | 2 | 40 | GAGA:0.475          |               | G:0.525         |
| chr28               | 9810895 | 2 | 38 | A:0.605263          |               | G:0.394737      |
| chr28               | 9811110 | 2 | 34 | G:0.617647          |               | A:0.382353      |
| chr28               | 9811232 | 2 | 36 | G:0.611111          |               | C:0.388889      |
| chr28               | 9811910 | 2 | 38 | C:0.526316          |               | T:0.473684      |
| chr28               | 9812192 | 2 | 40 | C:0.5               | T:0.5         |                 |
| chr28               | 9812358 | 2 | 36 | G:0.444444          |               | A:0.555556      |
| chr28               | 9812908 | 2 | 36 | T:0.472222          |               | A:0.527778      |
| chr28               | 9812918 | 3 | 40 | AGTGTGTGTGTGTGT:0.1 |               | A:0.475         |
| AGTGTGTGTGTGT:0.425 |         |   |    |                     |               |                 |
| chr28               | 9813361 | 2 | 40 | T:0                 | G:1           |                 |
| chr28               | 9813377 | 2 | 40 | G:0.775             | A:0.225       |                 |
| chr28               | 9813701 | 2 | 38 | C:0.526316          |               | A:0.473684      |
| chr28               | 9814165 | 2 | 36 | C:0.388889          |               | T:0.611111      |
| chr28               | 9814419 | 3 | 40 | GAA:0.55            | G:0.125       | GAAAA:0.325     |
| chr28               | 9814618 | 2 | 40 | G:1                 | T:0           |                 |
| chr28               | 9814674 | 2 | 36 | A:0                 | G:1           |                 |
| chr28               | 9814903 | 2 | 38 | C:0.447368          |               | T:0.552632      |
| chr28               | 9814907 | 2 | 38 | T:1                 | A:0           |                 |
| chr28               | 9815148 | 2 | 40 | A:0                 | G:1           |                 |
| chr28               | 9815254 | 2 | 40 | T:0.775             | TTAATAA:0.225 |                 |
| chr28               | 9815653 | 2 | 38 | G:0                 | A:1           |                 |
| chr28               | 9815684 | 2 | 36 | G:0.833333          |               | A:0.166667      |
| chr28               | 9815850 | 2 | 36 | G:0.666667          |               | A:0.333333      |

|           |         |   |    |                       |            |            |  |
|-----------|---------|---|----|-----------------------|------------|------------|--|
| chr28     | 9816208 | 2 | 40 | T:0                   | C:1        |            |  |
| chr28     | 9816217 | 2 | 40 | C:0                   | A:1        |            |  |
| chr28     | 9817044 | 2 | 38 | A:0.736842            |            | G:0.263158 |  |
| chr28     | 9817417 | 2 | 38 | G:0.289474            |            | A:0.710526 |  |
| chr28     | 9817556 | 2 | 40 | T:0.55                | C:0.45     |            |  |
| chr28     | 9818005 | 3 | 38 | A:0.342105            |            | G:0.157895 |  |
| T:0.5     |         |   |    |                       |            |            |  |
| chr28     | 9818139 | 2 | 36 | G:0.388889            |            | A:0.611111 |  |
| chr28     | 9818302 | 2 | 36 | C:0.75                | T:0.25     |            |  |
| chr28     | 9818360 | 2 | 36 | GGTGA:0.666667        |            | G:0.333333 |  |
| chr28     | 9818551 | 2 | 38 | T:0.289474            |            | C:0.710526 |  |
| chr28     | 9818586 | 2 | 38 | G:0.289474            |            | A:0.710526 |  |
| chr28     | 9818719 | 2 | 40 | C:0.3                 | T:0.7      |            |  |
| chr28     | 9818756 | 2 | 40 | C:0.3                 | T:0.7      |            |  |
| chr28     | 9819007 | 2 | 40 | T:0.375               | C:0.625    |            |  |
| chr28     | 9820122 | 2 | 38 | T:1                   | A:0        |            |  |
| chr28     | 9820376 | 2 | 40 | G:0                   | C:1        |            |  |
| chr28     | 9821600 | 2 | 40 | T:1                   | C:0        |            |  |
| chr28     | 9821617 | 2 | 40 | A:0.65                | AAAAC:0.35 |            |  |
| chr28     | 9821736 | 2 | 40 | G:0.675               | A:0.325    |            |  |
| chr28     | 9822122 | 2 | 38 | GAA:1                 | G:0        |            |  |
| chr28     | 9822210 | 2 | 40 | C:0                   | T:1        |            |  |
| chr28     | 9822230 | 2 | 38 | A:0                   | C:1        |            |  |
| chr28     | 9822659 | 2 | 38 | G:0                   | A:1        |            |  |
| chr28     | 9822684 | 2 | 36 | C:0.305556            |            | T:0.694444 |  |
| chr28     | 9822815 | 2 | 38 | T:0                   | C:1        |            |  |
| chr28     | 9822998 | 2 | 40 | C:1                   | CA:0       |            |  |
| chr28     | 9823379 | 2 | 38 | G:0.684211            |            | T:0.315789 |  |
| chr28     | 9823507 | 2 | 38 | T:1                   | C:0        |            |  |
| chr28     | 9823706 | 2 | 34 | G:0.794118            |            | A:0.205882 |  |
| chr28     | 9824113 | 2 | 40 | A:0.2                 | G:0.8      |            |  |
| chr28     | 9824436 | 2 | 40 | T:0.675               | G:0.325    |            |  |
| chr28     | 9824554 | 2 | 38 | C:0.552632            |            | T:0.447368 |  |
| chr28     | 9824573 | 2 | 40 | C:0.8                 | A:0.2      |            |  |
| chr28     | 9824820 | 2 | 6  | A:0.333333            |            | T:0.666667 |  |
| chr28     | 9824902 | 2 | 40 | G:0                   | A:1        |            |  |
| chr28     | 9825043 | 2 | 38 | A:1                   | G:0        |            |  |
| chr28     | 9825151 | 2 | 40 | CTTTTTTTTTT:0.5       |            | C:0.5      |  |
| chr28     | 9825239 | 2 | 36 | T:0.638889            |            | C:0.361111 |  |
| chr28     | 9825274 | 2 | 36 | T:0.25                | C:0.75     |            |  |
| chr28     | 9825381 | 2 | 34 | T:0.205882            |            | C:0.794118 |  |
| chr28     | 9825714 | 2 | 40 | C:0.725               | T:0.275    |            |  |
| chr28     | 9825812 | 2 | 38 | T:0.184211            |            | C:0.815789 |  |
| chr28     | 9826285 | 2 | 38 | G:1                   | A:0        |            |  |
| chr28     | 9826483 | 2 | 40 | GAAGT:0.5             |            | G:0.5      |  |
| chr28     | 9826672 | 2 | 38 | C:0.210526            |            | T:0.789474 |  |
| chr28     | 9827433 | 2 | 38 | TTTTTC:0.710526       |            | T:0.289474 |  |
| chr28     | 9827734 | 2 | 34 | A:0.205882            |            | C:0.794118 |  |
| chr28     | 9827865 | 2 | 38 | C:0.263158            |            | T:0.736842 |  |
| chr28     | 9828526 | 2 | 38 | C:0.210526            |            | A:0.789474 |  |
| chr28     | 9828545 | 2 | 40 | TACACACACAA:1         |            | T:0        |  |
| chr28     | 9828555 | 4 | 40 | AACACACACACACAC:0.2   |            | A:0.325    |  |
| AACAC:0.4 |         |   |    | CACACACACACACAC:0.075 |            |            |  |
| chr28     | 9828679 | 2 | 38 | C:0.789474            |            | A:0.210526 |  |

|                |         |   |    |                          |                  |
|----------------|---------|---|----|--------------------------|------------------|
| chr28          | 9828690 | 2 | 40 | TACAA:0.2                | T:0.8            |
| chr28          | 9828927 | 2 | 40 | C:0.25 T:0.75            |                  |
| chr28          | 9829025 | 2 | 40 | C:0.7 T:0.3              |                  |
| chr28          | 9829252 | 2 | 40 | T:0.25 C:0.75            |                  |
| chr28          | 9829295 | 2 | 38 | T:0.157895               | A:0.842105       |
| chr28          | 9829352 | 2 | 40 | T:0.225 G:0.775          |                  |
| chr28          | 9829354 | 2 | 40 | G:0.225 A:0.775          |                  |
| chr28          | 9829438 | 2 | 38 | G:0.184211               | A:0.815789       |
| chr28          | 9830182 | 2 | 38 | G:0.184211               | T:0.815789       |
| chr28          | 9830309 | 2 | 38 | T:0.210526               | TA:0.789474      |
| chr28          | 9830679 | 2 | 40 | T:0.025 TA:0.975         |                  |
| chr28          | 9830811 | 2 | 38 | C:1 A:0                  |                  |
| chr28          | 9831040 | 2 | 38 | G:0.184211               | A:0.815789       |
| chr28          | 9831068 | 2 | 38 | C:0.263158               | T:0.736842       |
| chr28          | 9831687 | 2 | 40 | T:0.25 C:0.75            |                  |
| chr28          | 9831751 | 2 | 40 | T:0.2 C:0.8              |                  |
| chr28          | 9832026 | 2 | 40 | A:1 G:0                  |                  |
| chr28          | 9832433 | 2 | 38 | T:1 C:0                  |                  |
| chr28          | 9832538 | 2 | 40 | A:0.2 G:0.8              |                  |
| chr28          | 9832873 | 2 | 36 | CT:0.166667              | C:0.833333       |
| chr28          | 9833889 | 2 | 36 | CTT:1 C:0                |                  |
| chr28          | 9833997 | 2 | 40 | T:0.2 C:0.8              |                  |
| chr28          | 9834032 | 2 | 30 | G:0.333333               | C:0.666667       |
| chr28          | 9834344 | 2 | 38 | G:0.157895               | A:0.842105       |
| chr28          | 9834526 | 2 | 40 | G:0.7 A:0.3              |                  |
| chr28          | 9834887 | 2 | 34 | T:0.205882               | G:0.794118       |
| chr28          | 9835154 | 2 | 40 | T:0.75 C:0.25            |                  |
| chr28          | 9835283 | 2 | 40 | T:0.675 G:0.325          |                  |
| chr28          | 9835327 | 2 | 38 | T:0.657895               | C:0.342105       |
| chr28          | 9836035 | 2 | 38 | C:0.763158               | G:0.236842       |
| chr28          | 9836232 | 2 | 38 | T:0.605263               | TGAGAGA:0.394737 |
| chr28          | 9836370 | 2 | 34 | C:0.529412               | T:0.470588       |
| chr28          | 9836413 | 2 | 36 | ATGTG:0.472222           | A:0.527778       |
| chr28          | 9836440 | 2 | 36 | TGTGTGC:0.666667         | T:0.333333       |
| chr28          | 9836868 | 2 | 40 | C:0.675 T:0.325          |                  |
| chr28          | 9836958 | 2 | 38 | C:1 T:0                  |                  |
| chr28          | 9837299 | 2 | 38 | C:1 T:0                  |                  |
| chr28          | 9837424 | 2 | 38 | C:0.763158               | G:0.236842       |
| chr28          | 9837820 | 2 | 38 | C:0.631579               | T:0.368421       |
| chr28          | 9838398 | 2 | 40 | A:0.7 G:0.3              |                  |
| chr28          | 9838524 | 2 | 40 | G:0.675 A:0.325          |                  |
| chr28          | 9838729 | 2 | 40 | G:0.6 A:0.4              |                  |
| chr28          | 9839753 | 3 | 36 | G:0.361111               | GAT:0.472222     |
| GATAT:0.166667 |         |   |    |                          |                  |
| chr28          | 9839853 | 2 | 30 | C:0.233333               | CCT:0.766667     |
| chr28          | 9840164 | 2 | 40 | A:1 G:0                  |                  |
| chr28          | 9840384 | 2 | 38 | T:0.684211               | G:0.315789       |
| chr28          | 9840452 | 2 | 40 | A:0.6 T:0.4              |                  |
| chr28          | 9840554 | 2 | 40 | T:0.625 C:0.375          |                  |
| chr28          | 9841083 | 2 | 40 | C:0.5 G:0.5              |                  |
| chr28          | 9841148 | 2 | 38 | C:1 T:0                  |                  |
| chr28          | 9841160 | 2 | 38 | G:0.736842               | A:0.263158       |
| chr28          | 9842075 | 2 | 40 | G:0.775 A:0.225          |                  |
| chr28          | 9842205 | 3 | 40 | T:0.7 TAA:0.25 TAAA:0.05 |                  |

|       |                                                     |   |    |               |         |                  |
|-------|-----------------------------------------------------|---|----|---------------|---------|------------------|
| chr28 | 9842215                                             | 3 | 40 | TA:0.225      | T:0.475 | AA:0.3           |
| chr28 | 9842217                                             | 2 | 40 | A:0.975       | T:0.025 |                  |
| chr28 | 9842220                                             | 2 | 40 | A:1           | T:0     |                  |
| chr28 | 9842238                                             | 3 | 40 | A:0.2         | AT:0.5  | AAT:0.3          |
| chr28 | 9842322                                             | 2 | 40 | C:0.675       | T:0.325 |                  |
| chr28 | 9842442                                             | 2 | 38 | G:0.684211    |         | C:0.315789       |
| chr28 | 9842543                                             | 2 | 40 | A:0.625       | T:0.375 |                  |
| chr28 | 9842745                                             | 2 | 38 | C:0.605263    |         | T:0.394737       |
| chr28 | 9843409                                             | 2 | 36 | T:0.722222    |         | C:0.277778       |
| chr28 | 9843430                                             | 2 | 36 | T:0.722222    |         | C:0.277778       |
| chr28 | 9843567                                             | 2 | 32 | T:0.65625     |         | TAA:0.34375      |
| chr28 | 9843654                                             | 2 | 32 | G:1           | C:0     |                  |
| chr28 | 9843795                                             | 2 | 2  | C:1           | T:0     |                  |
| chr28 | 9843984                                             | 2 | 40 | T:0.575       | C:0.425 |                  |
| chr28 | 9843998                                             | 2 | 40 | G:1           | A:0     |                  |
| chr28 | 9844064                                             | 2 | 40 | G:1           | GAT:0   |                  |
| chr28 | 9844773                                             | 2 | 38 | C:1           | T:0     |                  |
| chr28 | 9844863                                             | 3 | 34 | CA:0.588235   |         | C:0 CAA:         |
|       | 0.411765                                            |   |    |               |         |                  |
| chr28 | 9844902                                             | 2 | 36 | C:0.666667    |         | T:0.333333       |
| chr28 | 9845152                                             | 2 | 38 | G:0.684211    |         | A:0.315789       |
| chr28 | 9845180                                             | 2 | 38 | A:0.684211    |         | T:0.315789       |
| chr28 | 9845491                                             | 2 | 40 | A:0.725       | G:0.275 |                  |
| chr28 | 9845837                                             | 2 | 40 | TA:0.675      | T:0.325 |                  |
| chr28 | 9845981                                             | 2 | 38 | A:0.631579    |         | G:0.368421       |
| chr28 | 9846137                                             | 2 | 38 | A:0.684211    |         | G:0.315789       |
| chr28 | 9846192                                             | 3 | 40 | CAGAG:0.55    |         | C:0.275 CAGAGAG: |
|       | 0.175                                               |   |    |               |         |                  |
| chr28 | 9846229                                             | 2 | 36 | G:0.638889    |         | C:0.361111       |
| chr28 | 9846345                                             | 2 | 36 | TC:0.694444   |         | T:0.305556       |
| chr28 | 9846363                                             | 3 | 38 | T:0.236842    |         | TA:0.631579      |
|       | TAA:0.131579                                        |   |    |               |         |                  |
| chr28 | 9846436                                             | 2 | 40 | G:0.95        | A:0.05  |                  |
| chr28 | 9846461                                             | 2 | 40 | C:0.725       | T:0.275 |                  |
| chr28 | 9846494                                             | 2 | 40 | T:0.625       | C:0.375 |                  |
| chr28 | 9846687                                             | 2 | 38 | C:0.710526    |         | CCT:0.289474     |
| chr28 | 9846729                                             | 2 | 38 | AT:0.5        | A:0.5   |                  |
| chr28 | 9846731                                             | 2 | 38 | TTA:1         | T:0     |                  |
| chr28 | 9846732                                             | 2 | 38 | TA:0.526316   |         | T:0.473684       |
| chr28 | 9847396                                             | 2 | 38 | C:0.657895    |         | T:0.342105       |
| chr28 | 9847506                                             | 2 | 40 | T:0           | C:1     |                  |
| chr28 | 9847533                                             | 2 | 36 | A:0.666667    |         | C:0.333333       |
| chr28 | 9848139                                             | 2 | 38 | T:0.973684    |         | C:0.0263158      |
| chr28 | 9848246                                             | 2 | 36 | G:0.777778    |         | A:0.222222       |
| chr28 | 9848298                                             | 2 | 40 | A:0.1         | G:0.9   |                  |
| chr28 | 9849306                                             | 2 | 38 | C:0.131579    |         | T:0.868421       |
| chr28 | 9849486                                             | 2 | 40 | A:0.95        | AC:0.05 |                  |
| chr28 | 9849721                                             | 2 | 40 | A:0.15        | C:0.85  |                  |
| chr28 | 9849820                                             | 2 | 38 | CACA:0.157895 |         | C:0.842105       |
| chr28 | 9849928                                             | 2 | 40 | A:0.125       | T:0.875 |                  |
| chr28 | 9850403                                             | 2 | 38 |               |         |                  |
|       | CTAGTAGCACCTAGTAGGTGGGAGAGTGAAGCGGGGCGAAG:0.0789474 |   |    |               |         | C:               |
|       | 0.921053                                            |   |    |               |         |                  |
| chr28 | 9850627                                             | 2 | 40 | A:0.975       | G:0.025 |                  |



|                    |         |   |    |                 |                |
|--------------------|---------|---|----|-----------------|----------------|
| chr28              | 9850811 | 2 | 36 | AT:0.361111     | A:0.638889     |
| chr28              | 9850888 | 2 | 40 | C:0.3 CT:0.7    |                |
| chr28              | 9850891 | 2 | 40 | A:0.3 T:0.7     |                |
| chr28              | 9851276 | 2 | 40 | A:0.225 C:0.775 |                |
| chr28              | 9851497 | 2 | 36 | A:0.944444      | G:0.0555556    |
| chr28              | 9851627 | 2 | 40 | G:0.325 A:0.675 |                |
| chr28              | 9851629 | 2 | 40 | TC:1 T:0        |                |
| chr28              | 9851788 | 2 | 36 | C:1 T:0         |                |
| chr28              | 9851888 | 2 | 40 | A:0.975 T:0.025 |                |
| chr28              | 9852068 | 2 | 40 | TGGG:0.275      | T:0.725        |
| chr28              | 9852170 | 2 | 38 | ACCT:0.526316   | A:0.473684     |
| chr28              | 9852576 | 2 | 38 | A:0.947368      | G:0.0526316    |
| chr28              | 9852994 | 2 | 40 | A:0.95 T:0.05   |                |
| chr28              | 9853053 | 2 | 40 | G:0.5 A:0.5     |                |
| chr28              | 9853304 | 2 | 38 | C:0.315789      | T:0.684211     |
| chr28              | 9853494 | 2 | 40 | A:0.425 G:0.575 |                |
| chr28              | 9853508 | 2 | 38 | A:0.315789      | G:0.684211     |
| chr28              | 9853632 | 2 | 38 | C:0.368421      | CGAGG:0.631579 |
| chr28              | 9853923 | 2 | 34 | C:0.823529      | A:0.176471     |
| chr28              | 9854234 | 2 | 36 | C:0.416667      | T:0.583333     |
| chr28              | 9854412 | 2 | 36 | A:0.5 T:0.5     |                |
| chr28              | 9854497 | 2 | 40 | AAC:0.95 A:0.05 |                |
| chr28              | 9854514 | 2 | 40 | C:0.375 G:0.625 |                |
| chr28              | 9854797 | 2 | 38 | G:0.447368      | A:0.552632     |
| chr28              | 9855172 | 2 | 40 | A:0.35 G:0.65   |                |
| chr28              | 9855239 | 3 | 38 | C:0.157895      | CT:0.236842    |
| CTT:0.605263       |         |   |    |                 |                |
| chr28              | 9855333 | 2 | 40 | A:0.425 C:0.575 |                |
| chr28              | 9855871 | 2 | 38 | G:0.5 A:0.5     |                |
| chr28              | 9856031 | 2 | 38 | A:0.394737      | AG:0.605263    |
| chr28              | 9856260 | 2 | 38 | G:0.368421      | A:0.631579     |
| chr28              | 9856378 | 2 | 38 | G:0.394737      | C:0.605263     |
| chr28              | 9856454 | 2 | 36 | CA:0.944444     | C:0.0555556    |
| chr28              | 9856687 | 2 | 40 | A:0.475 G:0.525 |                |
| chr28              | 9856755 | 2 | 38 | C:0.526316      | T:0.473684     |
| chr28              | 9856858 | 2 | 40 | C:1 T:0         |                |
| chr28              | 9857134 | 2 | 40 | T:0.4 C:0.6     |                |
| chr28              | 9858708 | 2 | 34 | C:1 T:0         |                |
| chr28              | 9859278 | 2 | 38 | C:0.5 T:0.5     |                |
| chr28              | 9861136 | 4 | 40 | CCT:0.8 C:0.1   | CCTCT:0.05     |
| CCTCTCT:0.05       |         |   |    |                 |                |
| chr28              | 9861190 | 3 | 36 | TA:0.305556     | T:0.111111     |
| TAA:0.583333       |         |   |    |                 |                |
| chr28              | 9861661 | 2 | 36 | C:1 T:0         |                |
| chr28              | 9862142 | 2 | 36 | C:0.333333      | T:0.666667     |
| chr28              | 9862228 | 2 | 32 | GGAGAGA:0.6875  | G:0.3125       |
| chr28              | 9862257 | 2 | 36 | GAGAGA:0.75     | G:0.25         |
| chr28              | 9862263 | 4 | 38 | GGC:0.657895    | GCGC:0.289474  |
| G:0.0526316 GCGC:0 |         |   |    |                 |                |
| chr28              | 9862625 | 2 | 40 | T:1 C:0         |                |
| chr28              | 9862626 | 2 | 40 | C:1 T:0         |                |
| chr28              | 9862661 | 2 | 38 | C:1 T:0         |                |
| chr28              | 9862727 | 2 | 40 | C:0.975 G:0.025 |                |
| chr28              | 9862798 | 2 | 40 | G:1 A:0         |                |

|                 |         |                 |    |             |          |             |
|-----------------|---------|-----------------|----|-------------|----------|-------------|
| chr28           | 9863474 | 2               | 40 | C:1         | A:0      |             |
| chr28           | 9863582 | 2               | 40 | A:1         | ATG:0    |             |
| chr28           | 9863699 | 2               | 40 | G:0.5       | A:0.5    |             |
| chr28           | 9863896 | 2               | 40 | C:1         | T:0      |             |
| chr28           | 9864348 | 2               | 36 | G:1         | A:0      |             |
| chr28           | 9864350 | 2               | 36 | T:1         | TA:0     |             |
| chr28           | 9864458 | 2               | 36 | C:0.944444  |          | T:0.0555556 |
| chr28           | 9864476 | 2               | 36 | A:0.416667  |          | G:0.583333  |
| chr28           | 9864707 | 2               | 38 | T:1         | A:0      |             |
| chr28           | 9864884 | 2               | 40 | G:0.375     | A:0.625  |             |
| chr28           | 9865059 | 2               | 36 | A:1         | G:0      |             |
| chr28           | 9865602 | 2               | 38 | C:0.894737  |          | A:0.105263  |
| chr28           | 9865684 | 2               | 40 | A:0.425     | G:0.575  |             |
| chr28           | 9865692 | 2               | 40 | G:1         | T:0      |             |
| chr28           | 9865757 | 2               | 40 | C:1         | A:0      |             |
| chr28           | 9865970 | 2               | 40 | C:1         | T:0      |             |
| chr28           | 9866030 | 2               | 40 | C:1         | T:0      |             |
| chr28           | 9866648 | 4               | 40 | TTTTA:0.175 |          | T:0.05      |
| TTTTATTTA:0.775 |         | TTTTATTTATTTA:0 |    |             |          |             |
| chr28           | 9866773 | 2               | 36 | C:1         | T:0      |             |
| chr28           | 9867334 | 2               | 40 | G:1         | A:0      |             |
| chr28           | 9867590 | 2               | 40 | G:1         | A:0      |             |
| chr28           | 9867754 | 2               | 38 | T:0.421053  |          | C:0.578947  |
| chr28           | 9867842 | 2               | 38 | C:0.973684  |          | G:0.0263158 |
| chr28           | 9867917 | 2               | 34 | C:1         | G:0      |             |
| chr28           | 9868206 | 2               | 40 | A:0.6       | T:0.4    |             |
| chr28           | 9868291 | 2               | 40 | T:0.975     | G:0.025  |             |
| chr28           | 9868294 | 2               | 40 | T:0.425     | C:0.575  |             |
| chr28           | 9868531 | 2               | 36 | A:0.611111  |          | C:0.388889  |
| chr28           | 9868569 | 2               | 36 | T:0.972222  |          | C:0.0277778 |
| chr28           | 9868623 | 2               | 40 | A:0.55      | G:0.45   |             |
| chr28           | 9868641 | 2               | 40 | G:0.575     | A:0.425  |             |
| chr28           | 9868719 | 2               | 38 | G:0.605263  |          | T:0.394737  |
| chr28           | 9868812 | 2               | 36 | C:0.583333  |          | T:0.416667  |
| chr28           | 9868859 | 2               | 38 | A:1         | C:0      |             |
| chr28           | 9868965 | 2               | 36 | TG:0.444444 |          | T:0.555556  |
| chr28           | 9869492 | 2               | 36 | T:0.5       | TA:0.5   |             |
| chr28           | 9869832 | 2               | 40 | C:0.975     | T:0.025  |             |
| chr28           | 9869902 | 2               | 38 | C:1         | T:0      |             |
| chr28           | 9870157 | 2               | 40 | ATTAGT:0.9  |          | A:0.1       |
| chr28           | 9871663 | 2               | 40 | A:0.5       | G:0.5    |             |
| chr28           | 9872139 | 2               | 40 | T:0.475     | C:0.525  |             |
| chr28           | 9872724 | 2               | 38 | T:0.421053  |          | C:0.578947  |
| chr28           | 9872888 | 2               | 36 | T:0.416667  |          | A:0.583333  |
| chr28           | 9872930 | 2               | 32 | G:0.4375    | T:0.5625 |             |
| chr28           | 9873655 | 2               | 38 | G:0.973684  |          | T:0.0263158 |
| chr28           | 9874827 | 2               | 38 | G:0.473684  |          | C:0.526316  |
| chr28           | 9875173 | 2               | 38 | A:1         | G:0      |             |
| chr28           | 9875181 | 2               | 38 | G:0.973684  |          | T:0.0263158 |
| chr28           | 9875347 | 2               | 40 | G:0.525     | A:0.475  |             |
| chr28           | 9875558 | 2               | 40 | T:0.6       | C:0.4    |             |
| chr28           | 9875957 | 2               | 40 | GA:0.5      | G:0.5    |             |
| chr28           | 9876029 | 2               | 36 | C:0.583333  |          | T:0.416667  |
| chr28           | 9876312 | 2               | 38 | A:1         | G:0      |             |

|              |         |   |    |             |                  |
|--------------|---------|---|----|-------------|------------------|
| chr28        | 9876381 | 2 | 40 | T:1         | TGGAGGGCCAC:0    |
| chr28        | 9876550 | 2 | 36 | G:0.5       | T:0.5            |
| chr28        | 9877259 | 2 | 40 | T:0.6       | C:0.4            |
| chr28        | 9877592 | 2 | 36 | T:0.555556  | G:0.444444       |
| chr28        | 9877635 | 2 | 38 | G:0.5       | GA:0.5           |
| chr28        | 9877656 | 2 | 40 | T:0.375     | A:0.625          |
| chr28        | 9877730 | 2 | 40 | A:0.525     | G:0.475          |
| chr28        | 9878408 | 2 | 32 | C:0.53125   | G:0.46875        |
| chr28        | 9878831 | 2 | 40 | G:0.9       | A:0.1            |
| chr28        | 9878967 | 2 | 40 | G:0.45      | A:0.55           |
| chr28        | 9879096 | 2 | 38 | T:0.947368  | A:0.0526316      |
| chr28        | 9879617 | 2 | 40 | G:1         | T:0              |
| chr28        | 9880012 | 2 | 38 | C:0.105263  | T:0.894737       |
| chr28        | 9880112 | 2 | 34 | C:0.117647  | T:0.882353       |
| chr28        | 9880193 | 2 | 40 | G:0.95      | A:0.05           |
| chr28        | 9880387 | 2 | 40 | C:0.825     | G:0.175          |
| chr28        | 9880464 | 2 | 40 | CCA:0.975   | C:0.025          |
| chr28        | 9880508 | 2 | 36 | G:0.138889  | A:0.861111       |
| chr28        | 9880510 | 2 | 36 | A:0.0555556 | G:0.944444       |
| chr28        | 9880537 | 2 | 36 | A:0.138889  | G:0.861111       |
| chr28        | 9880570 | 2 | 38 | G:0.947368  | A:0.0526316      |
| chr28        | 9880870 | 2 | 38 | T:0.157895  | TC:0.842105      |
| chr28        | 9880874 | 2 | 38 | T:0.157895  | TCTACCA:0.842105 |
| chr28        | 9880964 | 2 | 38 | A:0.131579  | G:0.868421       |
| chr28        | 9881334 | 2 | 34 | C:0.882353  | G:0.117647       |
| chr28        | 9881668 | 2 | 38 | C:1         | T:0              |
| chr28        | 9881779 | 2 | 40 | G:0.95      | T:0.05           |
| chr28        | 9881780 | 3 | 34 | AT:0.529412 | A:0.352941       |
| ATT:0.117647 |         |   |    |             |                  |
| chr28        | 9881785 | 2 | 40 | T:0.95      | A:0.05           |
| chr28        | 9882122 | 2 | 40 | A:0.9       | G:0.1            |
| chr28        | 9882387 | 2 | 38 | C:0.894737  | A:0.105263       |
| chr28        | 9882497 | 2 | 34 | T:0.970588  | C:0.0294118      |
| chr28        | 9882690 | 2 | 38 | T:1         | A:0              |
| chr28        | 9882745 | 2 | 40 | G:0.825     | A:0.175          |
| chr28        | 9882816 | 2 | 36 | G:0.944444  | A:0.0555556      |
| chr28        | 9882890 | 2 | 38 | T:0         | C:1              |
| chr28        | 9882931 | 2 | 40 | G:1         | A:0              |
| chr28        | 9882979 | 2 | 38 | G:1         | A:0              |
| chr28        | 9883080 | 2 | 38 | G:0.868421  | C:0.131579       |
| chr28        | 9883168 | 2 | 40 | CAG:0.15    | C:0.85           |
| chr28        | 9883170 | 2 | 40 | GA:0.95     | G:0.05           |
| chr28        | 9883353 | 2 | 34 | T:0.205882  | C:0.794118       |
| chr28        | 9883357 | 2 | 36 | C:1         | T:0              |
| chr28        | 9883364 | 2 | 36 | A:0.166667  | G:0.833333       |
| chr28        | 9883521 | 2 | 34 | C:0.176471  | T:0.823529       |
| chr28        | 9883583 | 2 | 28 | C:0.178571  | CCG:0.821429     |
| chr28        | 9883586 | 2 | 28 | A:0.178571  | C:0.821429       |
| chr28        | 9883756 | 2 | 36 | AT:0.166667 | A:0.833333       |
| chr28        | 9883762 | 2 | 36 | G:0.916667  | C:0.0833333      |
| chr28        | 9884133 | 2 | 38 | G:0.894737  | A:0.105263       |
| chr28        | 9884153 | 2 | 40 | TA:1        | T:0              |
| chr28        | 9884223 | 2 | 40 | G:0.925     | A:0.075          |
| chr28        | 9884383 | 2 | 38 | T:0.0526316 | C:0.947368       |

|             |         |   |    |             |               |           |
|-------------|---------|---|----|-------------|---------------|-----------|
| chr28       | 9884555 | 2 | 36 | T:0.888889  | G:0.111111    |           |
| chr28       | 9884681 | 2 | 36 | A:0.888889  | G:0.111111    |           |
| chr28       | 9884689 | 2 | 38 | G:1         | A:0           |           |
| chr28       | 9884923 | 2 | 40 | A:0.8       | G:0.2         |           |
| chr28       | 9884992 | 2 | 40 | A:0.15      | T:0.85        |           |
| chr28       | 9885099 | 4 | 40 | T:0.1       | TA:0.1        | TAA:0.025 |
| TAAAA:0.775 |         |   |    |             |               |           |
| chr28       | 9885950 | 2 | 40 | ATCT:0.95   | A:0.05        |           |
| chr28       | 9886081 | 2 | 36 | T:1         | C:0           |           |
| chr28       | 9886147 | 2 | 36 | T:0.0833333 | C:0.916667    |           |
| chr28       | 9886881 | 2 | 38 | A:1         | T:0           |           |
| chr28       | 9887013 | 2 | 38 | A:0.947368  | G:0.0526316   |           |
| chr28       | 9887087 | 2 | 40 | A:1         | C:0           |           |
| chr28       | 9887412 | 2 | 38 | C:1         | T:0           |           |
| chr28       | 9887429 | 2 | 40 | T:0.95      | G:0.05        |           |
| chr28       | 9887864 | 2 | 38 | A:1         | G:0           |           |
| chr28       | 9888421 | 2 | 38 | G:1         | A:0           |           |
| chr28       | 9888500 | 2 | 34 | C:0.941176  | A:0.0588235   |           |
| chr28       | 9889061 | 2 | 38 | C:1         | A:0           |           |
| chr28       | 9889248 | 2 | 38 | A:0.921053  | G:0.0789474   |           |
| chr28       | 9889768 | 2 | 40 | TA:0.225    | T:0.775       |           |
| chr28       | 9889985 | 2 | 38 | T:1         | A:0           |           |
| chr28       | 9890004 | 2 | 36 | G:0.305556  | T:0.694444    |           |
| chr28       | 9890114 | 2 | 38 | T:0.947368  | G:0.0526316   |           |
| chr28       | 9890129 | 2 | 38 | T:0.947368  | A:0.0526316   |           |
| chr28       | 9890444 | 2 | 40 | C:0.95      | T:0.05        |           |
| chr28       | 9890455 | 2 | 40 | C:0.95      | T:0.05        |           |
| chr28       | 9890473 | 2 | 40 | A:0.95      | AC:0.05       |           |
| chr28       | 9890512 | 2 | 40 | G:0.925     | A:0.075       |           |
| chr28       | 9890523 | 2 | 40 | G:0.925     | T:0.075       |           |
| chr28       | 9890737 | 2 | 38 | A:0.894737  | T:0.105263    |           |
| chr28       | 9891212 | 2 | 40 | G:0.95      | A:0.05        |           |
| chr28       | 9891337 | 2 | 40 | G:1         | T:0           |           |
| chr28       | 9891404 | 2 | 38 | C:0.236842  | T:0.763158    |           |
| chr28       | 9891610 | 2 | 40 | C:0.925     | CT:0.075      |           |
| chr28       | 9891719 | 2 | 38 | C:0.973684  | T:0.0263158   |           |
| chr28       | 9891795 | 2 | 40 | TG:0.925    | T:0.075       |           |
| chr28       | 9892170 | 2 | 38 | C:0.947368  | T:0.0526316   |           |
| chr28       | 9892247 | 2 | 40 | A:0.9       | G:0.1         |           |
| chr28       | 9892299 | 2 | 40 | T:0.95      | C:0.05        |           |
| chr28       | 9892543 | 2 | 38 | A:0.921053  | C:0.0789474   |           |
| chr28       | 9892591 | 2 | 38 | T:0.947368  | G:0.0526316   |           |
| chr28       | 9892766 | 2 | 36 | A:0.944444  | G:0.0555556   |           |
| chr28       | 9892877 | 2 | 40 | C:0.3       | A:0.7         |           |
| chr28       | 9892943 | 2 | 36 | C:0.944444  | T:0.0555556   |           |
| chr28       | 9893728 | 2 | 40 | T:0.325     | G:0.675       |           |
| chr28       | 9893742 | 2 | 40 | G:0.95      | C:0.05        |           |
| chr28       | 9893744 | 2 | 40 | A:0.95      | G:0.05        |           |
| chr28       | 9893812 | 2 | 38 | A:1         | G:0           |           |
| chr28       | 9893869 | 2 | 36 | C:1         | G:0           |           |
| chr28       | 9894369 | 2 | 38 | C:0.947368  | CTT:0.0526316 |           |
| chr28       | 9894394 | 2 | 36 | C:0.305556  | T:0.694444    |           |
| chr28       | 9894917 | 2 | 40 | A:0.95      | G:0.05        |           |
| chr28       | 9894930 | 2 | 40 | C:1         | T:0           |           |

|               |         |   |    |              |           |             |
|---------------|---------|---|----|--------------|-----------|-------------|
| chr28         | 9895380 | 2 | 38 | T:1          | C:0       |             |
| chr28         | 9895399 | 2 | 40 | G:1          | A:0       |             |
| chr28         | 9895686 | 2 | 40 | C:1          | T:0       |             |
| chr28         | 9895992 | 2 | 28 | CT:0.25      | C:0.75    |             |
| chr28         | 9897009 | 2 | 30 | C:0.233333   |           | T:0.766667  |
| chr28         | 9897107 | 2 | 28 | C:0.714286   |           | T:0.285714  |
| chr28         | 9898734 | 2 | 34 | G:0.735294   |           | A:0.264706  |
| chr28         | 9898990 | 2 | 38 | A:1          | T:0       |             |
| chr28         | 9899121 | 2 | 40 | A:0.95       | AT:0.05   |             |
| chr28         | 9900019 | 2 | 38 | C:1          | T:0       |             |
| chr28         | 9900260 | 2 | 40 | T:0.225      | C:0.775   |             |
| chr28         | 9902271 | 2 | 40 | C:1          | A:0       |             |
| chr28         | 9902493 | 2 | 40 | GTA:0.95     | G:0.05    |             |
| chr28         | 9902507 | 2 | 40 | A:0.475      | T:0.525   |             |
| chr28         | 9902509 | 2 | 40 | A:0.3        | T:0.7     |             |
| chr28         | 9902511 | 2 | 40 | A:0.3        | T:0.7     |             |
| chr28         | 9902600 | 2 | 40 | T:0.55       | C:0.45    |             |
| chr28         | 9903002 | 2 | 36 | C:0.444444   |           | CA:0.555556 |
| chr28         | 9903712 | 2 | 40 | C:0.775      | T:0.225   |             |
| chr28         | 9904554 | 2 | 40 | G:0.8        | A:0.2     |             |
| chr28         | 9904665 | 2 | 36 | CT:0.527778  |           | C:0.472222  |
| chr28         | 9905089 | 2 | 40 | C:0.5        | A:0.5     |             |
| chr28         | 9905601 | 2 | 40 | A:0.8        | T:0.2     |             |
| chr28         | 9905625 | 2 | 40 | T:0.475      | C:0.525   |             |
| chr28         | 9906398 | 3 | 40 | C:0.4        | CA:0.35   | CAA:0.25    |
| chr28         | 9906895 | 2 | 40 | T:0.95       | A:0.05    |             |
| chr28         | 9908236 | 2 | 36 | C:1          | T:0       |             |
| chr28         | 9908829 | 2 | 40 | TAC:0.925    |           | T:0.075     |
| chr28         | 9909116 | 2 | 36 | A:0.472222   |           | T:0.527778  |
| chr28         | 9909253 | 3 | 36 | TA:0.527778  |           | T:0.361111  |
| TAA:0.111111  |         |   |    |              |           |             |
| chr28         | 9909408 | 2 | 38 | G:0.473684   |           | A:0.526316  |
| chr28         | 9910182 | 2 | 40 | G:0.75       | A:0.25    |             |
| chr28         | 9910194 | 2 | 40 | T:1          | C:0       |             |
| chr28         | 9910897 | 2 | 40 | C:0.525      | CAA:0.475 |             |
| chr28         | 9910907 | 2 | 40 | A:1          | C:0       |             |
| chr28         | 9910908 | 2 | 40 | C:0.35       | A:0.65    |             |
| chr28         | 9911166 | 2 | 40 | TACAGAC:0.45 |           | T:0.55      |
| chr28         | 9911617 | 2 | 40 | C:0.55       | A:0.45    |             |
| chr28         | 9912096 | 2 | 40 | TA:0.625     | T:0.375   |             |
| chr28         | 9912205 | 2 | 36 | C:0.805556   |           | T:0.194444  |
| chr28         | 9912296 | 2 | 38 | G:1          | A:0       |             |
| chr28         | 9912299 | 2 | 40 | C:1          | A:0       |             |
| chr28         | 9912740 | 2 | 40 | G:1          | A:0       |             |
| chr28         | 9913290 | 2 | 36 | G:1          | A:0       |             |
| chr28         | 9914398 | 2 | 40 | G:0.975      | GA:0.025  |             |
| chr28         | 9914533 | 2 | 36 | C:0.777778   |           | CT:0.222222 |
| chr28         | 9914702 | 2 | 40 | C:0.75       | T:0.25    |             |
| chr28         | 9915736 | 3 | 38 | T:0.368421   |           | TA:0.552632 |
| TAA:0.0789474 |         |   |    |              |           |             |
| chr28         | 9916602 | 2 | 38 | C:0.763158   |           | T:0.236842  |
| chr28         | 9916893 | 2 | 38 | AGG:0.5      | A:0.5     |             |
| chr28         | 9916896 | 2 | 38 | T:0.5        | TAG:0.5   |             |
| chr28         | 9916898 | 3 | 38 | AAATGAT:0    |           | A:0.5       |

ATAGTAATGAT:0.5

|                |                       |   |    |                           |                  |
|----------------|-----------------------|---|----|---------------------------|------------------|
| chr28          | 9917159               | 2 | 40 | G:0.45                    | A:0.55           |
| chr28          | 9917550               | 2 | 38 | G:0.710526                | A:0.289474       |
| chr28          | 9917873               | 2 | 40 | T:0.825                   | A:0.175          |
| chr28          | 9917902               | 2 | 40 | C:0.275                   | CCA:0.725        |
| chr28          | 9917957               | 2 | 40 | C:0.325                   | G:0.675          |
| chr28          | 9918034               | 2 | 38 | C:0.447368                | T:0.552632       |
| chr28          | 9918417               | 2 | 40 | A:0.525                   | G:0.475          |
| chr28          | 9918510               | 4 | 40 | ATGTGTGTG:0.15            | A:0.475 ATGTGTG: |
| 0.3            | ATGTGTGTGTGTGTG:0.075 |   |    |                           |                  |
| chr28          | 9918860               | 2 | 40 | T:0.55                    | C:0.45           |
| chr28          | 9918865               | 2 | 40 | T:0.575                   | TA:0.425         |
| chr28          | 9920614               | 2 | 40 | G:1                       | C:0              |
| chr28          | 9920691               | 2 | 36 | A:0.694444                | C:0.305556       |
| chr28          | 9921321               | 2 | 38 | A:0.447368                | G:0.552632       |
| chr28          | 9921393               | 2 | 38 | A:0.815789                | T:0.184211       |
| chr28          | 9921431               | 2 | 38 | T:1                       | TA:0             |
| chr28          | 9921727               | 2 | 40 | A:0.95                    | T:0.05           |
| chr28          | 9921736               | 2 | 40 | T:0.3                     | TAAAG:0.7        |
| chr28          | 9921988               | 2 | 38 | G:0.526316                | A:0.473684       |
| chr28          | 9922247               | 3 | 38 | GAGAAAGAA:0.236842        | G:               |
| 0.684211       | GAGAA:0.0789474       |   |    |                           |                  |
| chr28          | 9922309               | 2 | 38 | GAGA:0.789474             | G:0.210526       |
| chr28          | 9922312               | 2 | 34 | AAAAG:0.911765            | A:0.0882353      |
| chr28          | 9922350               | 2 | 38 | AAGAAAGAAAGAAAAG:0.789474 |                  |
| A:0.210526     |                       |   |    |                           |                  |
| chr28          | 9922389               | 3 | 40 | AAAAGAAAGAAAG:0.8         | A:0.05           |
| AAAAGAAAG:0.15 |                       |   |    |                           |                  |
| chr28          | 9922484               | 2 | 38 | A:0.605263                | AAACAAC:0.394737 |
| chr28          | 9922491               | 2 | 38 | A:0.842105                | T:0.157895       |
| chr28          | 9923102               | 2 | 40 | C:1                       | T:0              |
| chr28          | 9923322               | 2 | 40 | A:0.5                     | G:0.5            |
| chr28          | 9923729               | 2 | 40 | G:0.975                   | GA:0.025         |
| chr28          | 9924429               | 2 | 40 | T:0.5                     | C:0.5            |
| chr28          | 9924670               | 2 | 40 | G:0.475                   | GA:0.525         |
| chr28          | 9925035               | 2 | 40 | T:0.525                   | C:0.475          |
| chr28          | 9925087               | 2 | 40 | C:0.8                     | T:0.2            |
| chr28          | 9925180               | 2 | 40 | A:0.475                   | T:0.525          |
| chr28          | 9925490               | 2 | 38 | G:0.552632                | C:0.447368       |
| chr28          | 9925725               | 2 | 38 | T:0.236842                | C:0.763158       |
| chr28          | 9927365               | 2 | 40 | T:0.275                   | C:0.725          |
| chr28          | 9927462               | 2 | 38 | AAT:0.894737              | A:0.105263       |
| chr28          | 9927599               | 2 | 38 | C:0.605263                | T:0.394737       |
| chr28          | 9928055               | 2 | 38 | A:0.921053                | T:0.0789474      |
| chr28          | 9928142               | 2 | 40 | A:1                       | T:0              |
| chr28          | 9928654               | 2 | 38 | C:0.0526316               | T:0.947368       |
| chr28          | 9929062               | 2 | 40 | CCTCT:0.6                 | C:0.4            |
| chr28          | 9929534               | 2 | 40 | CAAAA:0.8                 | C:0.2            |
| chr28          | 9929677               | 2 | 20 | T:0.55                    | TA:0.45          |
| chr28          | 9930040               | 2 | 38 | TA:0.5                    | T:0.5            |
| chr28          | 9930276               | 2 | 38 | TA:0.605263               | T:0.394737       |
| chr28          | 9931128               | 2 | 24 | TA:0.625                  | T:0.375          |
| chr28          | 9932271               | 2 | 40 | C:0.5                     | T:0.5            |
| chr28          | 9932368               | 2 | 36 | T:0.805556                | C:0.194444       |

|                         |                     |   |    |                         |          |                  |
|-------------------------|---------------------|---|----|-------------------------|----------|------------------|
| chr28                   | 9932584             | 2 | 32 | T:0.4375                | C:0.5625 |                  |
| chr28                   | 9932724             | 2 | 38 | C:0.631579              |          | G:0.368421       |
| chr28                   | 9932870             | 6 | 40 | AATAGATAG:0.15          |          | A:0.075 AATAG:   |
| 0.15                    | AATAGATAGATAG:0.275 |   |    | AATAGATAGATAGATAG:0.225 |          |                  |
| AATAGATAGATAGATAG:0.125 |                     |   |    |                         |          |                  |
| chr28                   | 9934201             | 2 | 40 | G:1                     |          | A:0              |
| chr28                   | 9934316             | 2 | 38 | C:0.789474              |          | T:0.210526       |
| chr28                   | 9934493             | 2 | 40 | A:0.225                 |          | G:0.775          |
| chr28                   | 9934961             | 2 | 38 | C:0.526316              |          | CA:0.473684      |
| chr28                   | 9935090             | 2 | 40 | AT:0.975                |          | A:0.025          |
| chr28                   | 9935179             | 2 | 38 | G:0.473684              |          | A:0.526316       |
| chr28                   | 9935476             | 2 | 40 | T:0.95                  |          | G:0.05           |
| chr28                   | 9935849             | 3 | 36 | T:0.75                  |          | TA:0.25 TAA:0    |
| chr28                   | 9936028             | 2 | 40 | GA:0                    |          | G:1              |
| chr28                   | 9936036             | 2 | 40 | G:0                     |          | GA:1             |
| chr28                   | 9936130             | 2 | 36 | G:0.416667              |          | A:0.583333       |
| chr28                   | 9938943             | 3 | 38 | C:0.736842              |          | CA:0.0526316     |
| CAA:0.210526            |                     |   |    |                         |          |                  |
| chr28                   | 9939204             | 2 | 34 | AAC:0.676471            |          | A:0.323529       |
| chr28                   | 9939206             | 2 | 34 | C:0.882353              |          | A:0.117647       |
| chr28                   | 9940272             | 2 | 36 | A:0.833333              |          | G:0.166667       |
| chr28                   | 9940348             | 2 | 38 | TTTC:0.842105           |          | T:0.157895       |
| chr28                   | 9942369             | 2 | 40 | GGAGA:1                 |          | G:0              |
| chr28                   | 9944305             | 2 | 40 | T:0.45                  |          | C:0.55           |
| chr28                   | 9945252             | 2 | 34 | T:0.676471              |          | C:0.323529       |
| chr28                   | 9945832             | 2 | 38 | TA:0.421053             |          | T:0.578947       |
| chr28                   | 9947583             | 2 | 36 | T:1                     |          | C:0              |
| chr28                   | 9947736             | 3 | 38 | A:0.710526              |          | AG:0.236842      |
| AGG:0.0526316           |                     |   |    |                         |          |                  |
| chr28                   | 9947747             | 3 | 38 | A:0.5                   |          | AG:0.447368 G:   |
| 0.0526316               |                     |   |    |                         |          |                  |
| chr28                   | 9947926             | 2 | 40 | C:1                     |          | A:0              |
| chr28                   | 9947989             | 2 | 38 | C:0.947368              |          | CA:0.0526316     |
| chr28                   | 9948544             | 2 | 38 | A:0.973684              |          | C:0.0263158      |
| chr28                   | 9949016             | 2 | 38 | ACAAT:0.526316          |          | A:0.473684       |
| chr28                   | 9949084             | 2 | 40 | A:0.5                   |          | AT:0.5           |
| chr28                   | 9949465             | 2 | 40 | T:0.8                   |          | A:0.2            |
| chr28                   | 9950701             | 2 | 38 | T:1                     |          | C:0              |
| chr28                   | 9951013             | 2 | 36 | A:0.416667              |          | G:0.583333       |
| chr28                   | 9951541             | 2 | 40 | C:0.525                 |          | CCTCT:0.475      |
| chr28                   | 9952690             | 2 | 38 | C:0.842105              |          | T:0.157895       |
| chr28                   | 9953010             | 2 | 40 | A:1                     |          | T:0              |
| chr28                   | 9953318             | 2 | 34 | CCT:0.323529            |          | C:0.676471       |
| chr28                   | 9953671             | 2 | 40 | C:0.95                  |          | T:0.05           |
| chr28                   | 9953923             | 3 | 40 | G:0.7                   |          | GA:0.05 GAA:0.25 |
| chr28                   | 9954492             | 2 | 40 | G:0.5                   |          | GA:0.5           |
| chr28                   | 9954881             | 2 | 38 | T:0.578947              |          | G:0.421053       |
| chr28                   | 9954891             | 2 | 38 | AT:0.736842             |          | A:0.263158       |
| chr28                   | 9954901             | 2 | 38 | T:0.605263              |          | A:0.394737       |
| chr28                   | 9955119             | 2 | 38 | T:0.552632              |          | TA:0.447368      |
| chr28                   | 9955544             | 2 | 36 | G:0.833333              |          | T:0.166667       |
| chr28                   | 9955881             | 2 | 38 | C:0.526316              |          | G:0.473684       |
| chr28                   | 9956105             | 2 | 36 | C:0.972222              |          | T:0.0277778      |
| chr28                   | 9956137             | 3 | 38 | G:0.421053              |          | GTCTC:0.315789   |

GTCTCTC:0.263158  
 chr28 9956173 2 34 TA:0.5 T:0.5  
 chr28 9956424 2 36 A:0.472222 G:0.527778  
 chr28 9956653 2 40 C:0.5 T:0.5  
 chr28 9957148 2 40 T:0.45 C:0.55  
 chr28 9957756 2 38 T:0.421053 A:0.578947  
 chr28 9957779 2 40 T:0.95 TAAAA:0.05  
 chr28 9957785 2 40 T:0.9 TAA:0.1  
 chr28 9957787 2 40 A:0.45 AAT:0.55  
 chr28 9957794 3 40 TA:0.325 AA:0.125 T:0.55  
 chr28 9957796 2 38 A:0.921053 AT:0.0789474  
 chr28 9957802 2 40 A:0.45 T:0.55  
 chr28 9957821 2 40 T:0.45 C:0.55  
 chr28 9957952 5 40 CCTCTCTCTCTCTCTCT:0.225 C:0.525  
 CCTCTCTCTCT:0.2 CCTCTCTCTCTCT:0 CCTCTCTCTCTCTCT:0.05  
 chr28 9958001 2 38 CATAA:0.605263 C:0.394737  
 chr28 9958025 3 40 A:1 C:0 AATAC:0  
 chr28 9958242 2 40 CT:1 C:0  
 chr28 9958526 2 40 A:0.15 T:0.85  
 chr28 9958909 2 38 C:0.842105 T:0.157895  
 chr28 9959119 2 38 T:0.263158 C:0.736842  
 chr28 9959432 2 38 G:0.736842 A:0.263158  
 chr28 9959710 2 38 C:1 G:0  
 chr28 9959963 2 40 T:0.775 C:0.225  
 chr28 9960316 2 36 TA:0.833333 T:0.166667  
 chr28 9960317 2 38 A:0.789474 T:0.210526  
 chr28 9960471 2 38 TG:0.921053 T:0.0789474  
 chr28 9960605 3 38 TA:0.526316 T:0.263158  
 TAA:0.210526  
 chr28 9960622 2 38 T:0.578947 TCTG:0.421053  
 chr28 9960700 2 38 G:0.736842 A:0.263158  
 chr28 9960975 2 40 A:1 T:0  
 chr28 9961089 2 40 C:0.8 T:0.2  
 chr28 9961105 2 40 C:0.975 T:0.025  
 chr28 9961338 2 40 A:0.525 AG:0.475  
 chr28 9961482 2 40 C:0.55 CT:0.45  
 chr28 9961588 2 38 T:1 TC:0  
 chr28 9961876 2 38 A:0.763158 G:0.236842  
 chr28 9962049 2 40 CAT:0.75 C:0.25  
 chr28 9962281 2 38 CCT:0.763158 C:0.236842  
 chr28 9962470 2 40 T:0.95 C:0.05  
 chr28 9962583 2 40 A:1  
 AAGACATCACCCAGTCTACGGCCATAACCACCTGAACGCGCCCGATCTCGTCTGATCTCGGAAGCTAA  
 GCAGGGTCGGGCCTGGTTAGTACTTGGATGGG:0  
 chr28 9962672 2 38 T:0.763158 C:0.236842  
 chr28 9963026 2 40 C:0.825 T:0.175  
 chr28 9963417 2 40 C:0.75 T:0.25  
 chr28 9963449 2 40 G:1 A:0  
 chr28 9963862 2 38 C:0.368421 T:0.631579  
 chr28 9964118 2 36 C:0.833333 A:0.166667  
 chr28 9964363 2 40 T:0.75 C:0.25  
 chr28 9964449 2 40 C:0.7 CCTCT:0.3  
 chr28 9964485 4 38 T:0.315789 TA:0.447368  
 TAA:0.236842 TAAA:0



|           |         |   |    |                    |                 |
|-----------|---------|---|----|--------------------|-----------------|
| chr28     | 9964630 | 2 | 38 | C:0.763158         | CCTCT:0.236842  |
| chr28     | 9964740 | 2 | 40 | GA:0.25 G:0.75     |                 |
| chr28     | 9964838 | 2 | 40 | A:0.25 G:0.75      |                 |
| chr28     | 9965642 | 2 | 38 | G:0.631579         | A:0.368421      |
| chr28     | 9965676 | 2 | 40 | G:0.75 C:0.25      |                 |
| chr28     | 9967175 | 2 | 40 | A:1 G:0            |                 |
| chr28     | 9968483 | 2 | 36 | A:0.472222         | G:0.527778      |
| chr28     | 9969013 | 2 | 40 | T:0.7 C:0.3        |                 |
| chr28     | 9969507 | 2 | 40 | AAAG:1 A:0         |                 |
| chr28     | 9969512 | 2 | 40 | A:1 C:0            |                 |
| chr28     | 9969777 | 3 | 40 | AAC:0.925          | A:0.05 AACACAC: |
| 0.025     |         |   |    |                    |                 |
| chr28     | 9969871 | 2 | 38 | G:1 A:0            |                 |
| chr28     | 9969879 | 2 | 38 | T:0.342105         | C:0.657895      |
| chr28     | 9970039 | 2 | 38 | CGGGAGCCCCCGCGAT:0 | C:1             |
| chr28     | 9971287 | 2 | 28 | G:0.75 T:0.25      |                 |
| chr28     | 9971366 | 2 | 30 | C:0.9 A:0.1        |                 |
| chr28     | 9971397 | 2 | 30 | G:0.833333         | T:0.166667      |
| chr28     | 9971574 | 2 | 38 | C:0.710526         | A:0.289474      |
| chr28     | 9971681 | 2 | 38 | G:0.473684         | C:0.526316      |
| chr28     | 9971687 | 2 | 38 | A:0.947368         | C:0.0526316     |
| chr28     | 9972155 | 2 | 38 | C:1 CTTT:0         |                 |
| chr28     | 9972167 | 2 | 38 | T:0.5 TTA:0.5      |                 |
| chr28     | 9972180 | 2 | 38 | C:0.552632         | T:0.447368      |
| chr28     | 9972222 | 2 | 36 | A:1 T:0            |                 |
| chr28     | 9972623 | 2 | 32 | AT:0.9375          | A:0.0625        |
| chr28     | 9972653 | 4 | 36 | GT:0.277778        | G:0.25 GTTT:    |
| 0.0555556 |         |   |    |                    |                 |
| chr28     | 9972690 | 3 | 36 | CAGAG:0.472222     | C:0.527778      |
| CAGAGAG:0 |         |   |    |                    |                 |
| chr28     | 9973458 | 2 | 40 | G:0.575 A:0.425    |                 |
| chr28     | 9973537 | 2 | 40 | A:0.425 AAC:0.575  |                 |
| chr28     | 9973915 | 2 | 40 | C:1 CAA:0          |                 |
| chr28     | 9974638 | 2 | 40 | T:0.45 C:0.55      |                 |
| chr28     | 9974833 | 2 | 40 | C:0.475 T:0.525    |                 |
| chr28     | 9974848 | 2 | 40 | C:0.925 T:0.075    |                 |
| chr28     | 9974904 | 2 | 38 | A:0 G:1            |                 |
| chr28     | 9974936 | 2 | 38 | C:0.447368         | T:0.552632      |
| chr28     | 9975592 | 3 | 36 | C:0.694444         | CACAG:0.305556  |
| CACACAG:0 |         |   |    |                    |                 |
| chr28     | 9975627 | 2 | 32 | A:0.53125          | G:0.46875       |
| chr28     | 9975839 | 2 | 40 | T:1 C:0            |                 |
| chr28     | 9975887 | 2 | 36 | T:0.472222         | C:0.527778      |
| chr28     | 9975979 | 2 | 40 | A:0.475 C:0.525    |                 |
| chr28     | 9976067 | 2 | 40 | A:0.5 T:0.5        |                 |
| chr28     | 9976079 | 2 | 40 | C:0.5 T:0.5        |                 |
| chr28     | 9976406 | 2 | 40 | T:0.475 A:0.525    |                 |
| chr28     | 9976412 | 2 | 40 | T:0.475 C:0.525    |                 |
| chr28     | 9976549 | 2 | 36 | C:0.444444         | T:0.555556      |
| chr28     | 9976570 | 2 | 36 | GTC:0.5 G:0.5      |                 |
| chr28     | 9976621 | 2 | 38 | T:0.526316         | G:0.473684      |
| chr28     | 9976866 | 2 | 38 | T:0.368421         | TAG:0.631579    |
| chr28     | 9977173 | 2 | 38 | G:1 A:0            |                 |
| chr28     | 9977269 | 2 | 40 | G:0.375 A:0.625    |                 |

|       |         |   |    |                  |                 |             |
|-------|---------|---|----|------------------|-----------------|-------------|
| chr28 | 9977368 | 2 | 40 | G:0.475          | A:0.525         |             |
| chr28 | 9977531 | 2 | 40 | C:0.45           | CA:0.55         |             |
| chr28 | 9977551 | 3 | 40 | C:0.975          | CA:0.025        | CAA:0       |
| chr28 | 9977615 | 2 | 40 | T:0.55           | C:0.45          |             |
| chr28 | 9977652 | 2 | 40 | G:1              | A:0             |             |
| chr28 | 9977724 | 2 | 40 | G:0.45           | A:0.55          |             |
| chr28 | 9977937 | 2 | 40 | A:0.5            | G:0.5           |             |
| chr28 | 9978248 | 2 | 38 | A:0.473684       |                 | G:0.526316  |
| chr28 | 9978328 | 2 | 34 | A:1              | G:0             |             |
| chr28 | 9978417 | 2 | 38 | T:0.394737       |                 | C:0.605263  |
| chr28 | 9978479 | 2 | 36 | A:1              | G:0             |             |
| chr28 | 9978950 | 2 | 34 | T:0.470588       |                 | C:0.529412  |
| chr28 | 9979983 | 2 | 38 | C:1              | T:0             |             |
| chr28 | 9980549 | 2 | 38 | C:0.447368       |                 | T:0.552632  |
| chr28 | 9980829 | 2 | 38 | T:0.447368       |                 | C:0.552632  |
| chr28 | 9980925 | 2 | 38 | C:1              | T:0             |             |
| chr28 | 9981357 | 2 | 36 | G:1              | A:0             |             |
| chr28 | 9981483 | 2 | 38 | G:1              | A:0             |             |
| chr28 | 9981866 | 2 | 40 | A:0.975          | ATCCCTGGG:0.025 |             |
| chr28 | 9981870 | 2 | 40 | C:0.975          | CGCAGCGGT:0.025 |             |
| chr28 | 9981975 | 2 | 38 | T:0.473684       |                 | C:0.526316  |
| chr28 | 9982005 | 2 | 38 | A:0.421053       |                 | G:0.578947  |
| chr28 | 9982050 | 2 | 36 | C:0.916667       |                 | T:0.0833333 |
| chr28 | 9982104 | 2 | 40 | C:0.4            | T:0.6           |             |
| chr28 | 9982112 | 2 | 40 | G:0.4            | A:0.6           |             |
| chr28 | 9982162 | 3 | 38 | CCTCTCT:0.421053 |                 | C:0.526316  |
| chr28 | 9982193 | 2 | 34 | C:0.470588       |                 | G:0.529412  |
| chr28 | 9982831 | 2 | 40 | C:0.425          | G:0.575         |             |
| chr28 | 9982863 | 2 | 40 | C:0.5            | T:0.5           |             |
| chr28 | 9983073 | 2 | 36 | C:0.416667       |                 | T:0.583333  |
| chr28 | 9983260 | 2 | 38 | G:0.368421       |                 | A:0.631579  |
| chr28 | 9983295 | 2 | 40 | C:0.425          | A:0.575         |             |
| chr28 | 9983396 | 2 | 36 | G:1              | A:0             |             |
| chr28 | 9983522 | 2 | 40 | G:0.5            | A:0.5           |             |
| chr28 | 9983533 | 2 | 40 | T:0.475          | C:0.525         |             |
| chr28 | 9983570 | 2 | 40 | C:0.425          | T:0.575         |             |
| chr28 | 9984009 | 2 | 38 | T:0.421053       |                 | C:0.578947  |
| chr28 | 9984025 | 2 | 40 | G:0.45           | A:0.55          |             |
| chr28 | 9984223 | 2 | 40 | C:1              | G:0             |             |
| chr28 | 9984291 | 2 | 38 | C:0.394737       |                 | G:0.605263  |
| chr28 | 9984452 | 2 | 40 | T:1              | C:0             |             |
| chr28 | 9984534 | 2 | 40 | C:0.425          | G:0.575         |             |
| chr28 | 9984633 | 2 | 40 | G:1              | A:0             |             |
| chr28 | 9984635 | 2 | 40 | G:0.5            | C:0.5           |             |
| chr28 | 9984850 | 2 | 40 | C:1              | T:0             |             |
| chr28 | 9984907 | 2 | 40 | T:0.45           | TA:0.55         |             |
| chr28 | 9985389 | 2 | 36 | A:1              | G:0             |             |
| chr28 | 9985655 | 2 | 36 | G:1              | A:0             |             |
| chr28 | 9985722 | 2 | 38 | T:0.105263       |                 | C:0.894737  |
| chr28 | 9985736 | 2 | 38 | A:0.421053       |                 | T:0.578947  |
| chr28 | 9985765 | 2 | 36 | T:1              | A:0             |             |
| chr28 | 9985816 | 2 | 38 | T:1              | TA:0            |             |
| chr28 | 9986285 | 2 | 40 | C:0.475          | T:0.525         |             |

|       |         |   |    |                   |         |             |
|-------|---------|---|----|-------------------|---------|-------------|
| chr28 | 9986551 | 2 | 40 | T:1               | C:0     |             |
| chr28 | 9986841 | 2 | 40 | G:0.8             | T:0.2   |             |
| chr28 | 9986915 | 2 | 38 | C:1               | G:0     |             |
| chr28 | 9987186 | 2 | 40 | T:0.5             | TAG:0.5 |             |
| chr28 | 9987300 | 2 | 40 | A:1               | T:0     |             |
| chr28 | 9987449 | 2 | 40 | C:1               | T:0     |             |
| chr28 | 9987855 | 2 | 38 | C:1               | A:0     |             |
| chr28 | 9987877 | 2 | 40 | T:0.35            | TA:0.65 |             |
| chr28 | 9987927 | 3 | 40 | AT:0.525          | A:0     | ATT:0.475   |
| chr28 | 9988108 | 2 | 38 | A:1               | T:0     |             |
| chr28 | 9988315 | 2 | 38 | T:1               | C:0     |             |
| chr28 | 9988511 | 2 | 24 | C:0.458333        |         | CA:0.541667 |
| chr28 | 9989242 | 2 | 40 | T:1               | A:0     |             |
| chr28 | 9990006 | 2 | 36 | C:1               | A:0     |             |
| chr28 | 9990178 | 2 | 38 | C:0.394737        |         | T:0.605263  |
| chr28 | 9990183 | 2 | 38 | C:0.394737        |         | T:0.605263  |
| chr28 | 9990416 | 2 | 38 | A:1               | G:0     |             |
| chr28 | 9990557 | 2 | 38 | T:1               | A:0     |             |
| chr28 | 9990932 | 2 | 40 | T:1               | C:0     |             |
| chr28 | 9990959 | 2 | 38 | T:1               | C:0     |             |
| chr28 | 9990970 | 2 | 38 | C:1               | T:0     |             |
| chr28 | 9991065 | 2 | 40 | C:0.5             | T:0.5   |             |
| chr28 | 9991102 | 2 | 38 | T:0.5             | G:0.5   |             |
| chr28 | 9991563 | 2 | 40 | A:1               | T:0     |             |
| chr28 | 9991672 | 2 | 40 | T:0.45            | C:0.55  |             |
| chr28 | 9991885 | 2 | 34 | C:1               | T:0     |             |
| chr28 | 9992325 | 2 | 38 | C:0.368421        |         | T:0.631579  |
| chr28 | 9992501 | 2 | 26 | G:0.307692        |         | A:0.692308  |
| chr28 | 9992546 | 2 | 24 | AGGAGG:0.291667   |         | A:0.708333  |
| chr28 | 9992570 | 2 | 24 | G:0.291667        |         | A:0.708333  |
| chr28 | 9992722 | 2 | 36 | G:0.388889        |         | A:0.611111  |
| chr28 | 9992731 | 2 | 36 | C:0.388889        |         | A:0.611111  |
| chr28 | 9992882 | 2 | 38 | A:1               | G:0     |             |
| chr28 | 9992924 | 2 | 38 | G:0.421053        |         | T:0.578947  |
| chr28 | 9992928 | 2 | 38 | A:0.421053        |         | G:0.578947  |
| chr28 | 9992963 | 2 | 36 | A:0.416667        |         | G:0.583333  |
| chr28 | 9993055 | 2 | 36 | G:0.5             | A:0.5   |             |
| chr28 | 9993060 | 2 | 36 | C:0.5             | T:0.5   |             |
| chr28 | 9993145 | 2 | 36 | C:0.416667        |         | T:0.583333  |
| chr28 | 9993279 | 2 | 36 | G:0.444444        |         | A:0.555556  |
| chr28 | 9993341 | 2 | 36 | C:0.444444        |         | T:0.555556  |
| chr28 | 9993410 | 2 | 38 | T:0.5             | C:0.5   |             |
| chr28 | 9993413 | 2 | 38 | T:0.5             | TG:0.5  |             |
| chr28 | 9993962 | 2 | 38 | C:0.342105        |         | T:0.657895  |
| chr28 | 9994647 | 2 | 36 | C:0.416667        |         | A:0.583333  |
| chr28 | 9994812 | 2 | 40 | T:0.35            | C:0.65  |             |
| chr28 | 9995928 | 2 | 40 | G:0.525           | T:0.475 |             |
| chr28 | 9996072 | 2 | 40 | G:0.475           | A:0.525 |             |
| chr28 | 9996290 | 2 | 40 | G:0.425           | A:0.575 |             |
| chr28 | 9996574 | 2 | 40 | AAGC:0.45         |         | A:0.55      |
| chr28 | 9996642 | 2 | 38 | T:0.421053        |         | C:0.578947  |
| chr28 | 9997195 | 2 | 36 | G:0.416667        |         | T:0.583333  |
| chr28 | 9997477 | 2 | 34 | C:0.470588        |         | G:0.529412  |
| chr28 | 9997600 | 4 | 38 | GATTTATTTATTTATTT |         | :0.447368   |

G:0.0263158 GATTTATTTATTTATTTATTT:0.184211  
GATTTATTTATTTATTTATTTATTTATTTATTT:0.342105  
chr28 9997720 2 36 C:1 T:0  
chr28 9997873 4 38 T:0.368421 TCACA:0.0789474  
TCACACA:0.526316 TCACACACA:0.0263158  
chr28 9997890 2 38 C:0.947368 G:0.0526316  
chr28 9998077 2 36 C:0.333333 T:0.666667  
chr28 9998409 2 36 T:0.361111 C:0.638889  
chr28 9998552 2 34 A:0.470588 G:0.529412  
chr28 9999121 2 34 C:0.323529 T:0.676471  
chr28 10000713 2 38 G:1 A:0  
chr28 10001026 2 38 TA:0.421053 T:0.578947  
chr28 10002489 2 38 C:0.421053 T:0.578947  
chr28 10002497 2 38 GCTCT:0.421053 G:0.578947  
chr28 10004928 2 40 GA:0.475 G:0.525  
chr28 10004934 2 40 A:0.475 G:0.525  
chr28 10004977 2 38 T:0.447368 C:0.552632  
chr28 10005188 2 36 C:0.444444 A:0.555556  
chr28 10005207 2 38 A:0.5 G:0.5  
chr28 10005272 2 36 A:0.444444 G:0.555556  
chr28 10005547 2 36 A:0.416667 T:0.583333  
chr28 10005764 2 40 A:0.5 G:0.5  
chr28 10006211 2 40 C:0.475 T:0.525  
chr28 10006365 2 40 T:0.425 C:0.575  
chr28 10006642 2 40 C:0.45 T:0.55  
chr28 10006683 2 38 G:0.473684 A:0.526316  
chr28 10006760 2 38 T:0.447368 TAGCCA:0.552632  
chr28 10006950 2 38 G:0.447368 A:0.552632  
chr28 10007006 2 40 G:0.475 T:0.525  
chr28 10007231 2 38 C:1 T:0  
chr28 10007530 2 36 G:0.444444 A:0.555556  
chr28 10007900 2 38 G:0.394737 A:0.605263  
chr28 10008098 2 38 G:0.947368 A:0.0526316  
chr28 10008446 2 38 C:0.421053 G:0.578947  
chr28 10009248 2 40 A:0.4 C:0.6  
chr28 10009355 2 38 A:0.342105 C:0.657895  
chr28 10009415 2 36 C:0.361111 T:0.638889  
chr28 10009645 2 40 G:0.4 A:0.6  
chr28 10009655 2 40 T:0.4 C:0.6  
chr28 10010658 2 38 A:0.5 G:0.5  
chr28 10010680 2 38 G:0.5 T:0.5  
chr28 10010872 2 38 C:0.473684 T:0.526316  
chr28 10011312 2 40 G:0.475 C:0.525  
chr28 10011360 2 40 T:1 TCATC:0  
chr28 10012507 2 36 T:1 C:0  
chr28 10012544 2 40 G:1 A:0  
chr28 10013329 2 40 G:0.35 T:0.65  
chr28 10013461 2 38 C:0.368421 G:0.631579  
chr28 10015175 2 38 AT:0.447368 A:0.552632  
chr28 10015379 2 36 CT:0.75 C:0.25  
chr28 10015437 2 38 G:1 A:0  
chr28 10015601 2 40 C:0.9 CT:0.1  
chr28 10015852 2 36 G:1 C:0  
chr28 10015955 2 40 G:0.45 A:0.55

|                                     |                                 |    |                              |              |
|-------------------------------------|---------------------------------|----|------------------------------|--------------|
| chr28                               | 10015988 2                      | 38 | G:0.394737                   | A:0.605263   |
| chr28                               | 10016418 2                      | 38 | A:0.447368                   | G:0.552632   |
| chr28                               | 10016464 2                      | 38 | ACT:0.394737                 | A:0.605263   |
| chr28                               | 10016606 2                      | 40 | G:0.9 T:0.1                  |              |
| chr28                               | 10016758 2                      | 40 | A:0.5 G:0.5                  |              |
| chr28                               | 10016842 2                      | 38 | T:0.447368                   | C:0.552632   |
| chr28                               | 10017100 2                      | 40 | A:1 G:0                      |              |
| chr28                               | 10018096 2                      | 40 | A:0.975 G:0.025              |              |
| chr28                               | 10018353 2                      | 38 | G:0.552632                   | T:0.447368   |
| chr28                               | 10020076 2                      | 38 | A:0.5 C:0.5                  |              |
| chr28                               | 10020334 6                      | 40 | ATTATTTATTTATTTATTTATT:0.325 |              |
| A:0                                 | ATTATTTATTTATTTATTTATTTATT:0.05 |    |                              |              |
| ATATTTATTTATTTATTTATTTATTTATT:0.45  |                                 |    |                              |              |
| ATTATTTATTTATTTATTTATTTATTTATT:0.05 |                                 |    |                              |              |
| ATATTTATTTATTTATTTATTTATTTATT:0.125 |                                 |    |                              |              |
| chr28                               | 10020378 2                      | 40 | T:1 C:0                      |              |
| chr28                               | 10020673 2                      | 40 | T:0.45 G:0.55                |              |
| chr28                               | 10020828 2                      | 38 | T:0.394737                   | C:0.605263   |
| chr28                               | 10021397 2                      | 40 | C:0.55 T:0.45                |              |
| chr28                               | 10022282 2                      | 36 | A:0.361111                   | G:0.638889   |
| chr28                               | 10023320 2                      | 30 | G:0.333333                   | A:0.666667   |
| chr28                               | 10024839 2                      | 40 | T:0.475 C:0.525              |              |
| chr28                               | 10024912 2                      | 40 | C:0.425 T:0.575              |              |
| chr28                               | 10025008 2                      | 40 | C:1 T:0                      |              |
| chr28                               | 10025114 2                      | 38 | A:0.421053                   | G:0.578947   |
| chr28                               | 10025601 2                      | 40 | T:0.45 C:0.55                |              |
| chr28                               | 10026279 2                      | 38 | G:1 A:0                      |              |
| chr28                               | 10026946 2                      | 40 | G:0.475 C:0.525              |              |
| chr28                               | 10027645 2                      | 38 | C:0.868421                   | T:0.131579   |
| chr28                               | 10027876 2                      | 40 | T:0.45 C:0.55                |              |
| chr28                               | 10028796 2                      | 40 | CCTTCCA:0.525                | C:0.475      |
| chr28                               | 10028803 2                      | 40 | T:0.525 TA:0.475             |              |
| chr28                               | 10029083 2                      | 38 | G:1 A:0                      |              |
| chr28                               | 10029354 2                      | 36 | G:0.333333                   | A:0.666667   |
| chr28                               | 10029920 2                      | 38 | G:0.421053                   | A:0.578947   |
| chr28                               | 10029933 2                      | 36 | GGA:0.916667                 | G:0.0833333  |
| chr28                               | 10030068 2                      | 34 | G:0.382353                   | A:0.617647   |
| chr28                               | 10030773 2                      | 40 | T:0.475 C:0.525              |              |
| chr28                               | 10030790 2                      | 36 | C:0.388889                   | CCT:0.611111 |
| chr28                               | 10030838 2                      | 34 | T:0.823529                   | TAA:0.176471 |
| chr28                               | 10030894 2                      | 40 | T:1 A:0                      |              |
| chr28                               | 10031113 2                      | 40 | C:1 T:0                      |              |
| chr28                               | 10031128 2                      | 40 | G:0.85 A:0.15                |              |
| chr28                               | 10031274 2                      | 40 | G:0.45 A:0.55                |              |
| chr28                               | 10031469 2                      | 40 | CATT:1 C:0                   |              |
| chr28                               | 10031581 2                      | 40 | CA:1 C:0                     |              |
| chr28                               | 10032164 2                      | 40 | C:0.375 CA:0.625             |              |
| chr28                               | 10032818 2                      | 38 | C:0.5 T:0.5                  |              |
| chr28                               | 10032927 2                      | 34 | C:1 A:0                      |              |
| chr28                               | 10033520 2                      | 38 | C:0.447368                   | T:0.552632   |
| chr28                               | 10034022 2                      | 34 | A:1 T:0                      |              |
| chr28                               | 10034024 2                      | 34 | A:0.5 G:0.5                  |              |
| chr28                               | 10034333 2                      | 38 | G:1 A:0                      |              |
| chr28                               | 10034440 2                      | 40 | CCT:0.775                    | C:0.225      |

|                |          |   |    |               |         |             |
|----------------|----------|---|----|---------------|---------|-------------|
| chr28          | 10034758 | 2 | 40 | A:0.5         | T:0.5   |             |
| chr28          | 10035134 | 2 | 38 | CTCTT:1       | C:0     |             |
| chr28          | 10035171 | 2 | 34 | A:1           | G:0     |             |
| chr28          | 10035173 | 2 | 32 | TA:0.96875    |         | T:0.03125   |
| chr28          | 10035182 | 2 | 34 | A:0.705882    |         | T:0.294118  |
| chr28          | 10035532 | 2 | 38 | G:1           | A:0     |             |
| chr28          | 10035735 | 2 | 40 | G:1           | A:0     |             |
| chr28          | 10035823 | 2 | 40 | AAAAAAT:0.525 |         | A:0.475     |
| chr28          | 10036775 | 2 | 38 | T:1           | C:0     |             |
| chr28          | 10037636 | 2 | 40 | GC:1          | G:0     |             |
| chr28          | 10037685 | 2 | 40 | T:0.5         | C:0.5   |             |
| chr28          | 10039396 | 3 | 40 | TTCTCTC:0.45  |         | T:0         |
| TTCTCTCTC:0.55 |          |   |    |               |         |             |
| chr28          | 10040013 | 2 | 40 | C:1           | G:0     |             |
| chr28          | 10040175 | 2 | 40 | A:0.475       | T:0.525 |             |
| chr28          | 10040882 | 2 | 38 | A:0.947368    |         | C:0.0526316 |
| chr28          | 10041010 | 2 | 38 | A:0           | G:1     |             |
| chr28          | 10041310 | 2 | 40 | G:1           | A:0     |             |
| chr28          | 10042479 | 2 | 40 | G:1           | A:0     |             |
| chr28          | 10042569 | 2 | 40 | G:1           | A:0     |             |
| chr28          | 10042632 | 2 | 38 | C:1           | T:0     |             |
| chr28          | 10042747 | 2 | 40 | C:0.35        | G:0.65  |             |
| chr28          | 10043976 | 2 | 36 | A:0.333333    |         | G:0.666667  |
| chr28          | 10044855 | 2 | 38 | A:1           | T:0     |             |
| chr28          | 10044930 | 2 | 40 | A:1           | T:0     |             |
| chr28          | 10044931 | 2 | 40 | A:1           | T:0     |             |
| chr28          | 10044951 | 2 | 40 | C:0.4         | T:0.6   |             |
| chr28          | 10045052 | 2 | 40 | T:1           | G:0     |             |
| chr28          | 10045135 | 2 | 40 | T:1           | A:0     |             |
| chr28          | 10045151 | 2 | 40 | C:1           | T:0     |             |
| chr28          | 10045236 | 2 | 40 | GTAAA:1       | G:0     |             |
| chr28          | 10045498 | 2 | 40 | C:1           | T:0     |             |
| chr28          | 10045566 | 2 | 36 | T:1           | A:0     |             |
| chr28          | 10045661 | 2 | 38 | T:1           | C:0     |             |
| chr28          | 10045823 | 2 | 40 | A:1           | G:0     |             |
| chr28          | 10046105 | 2 | 40 | C:0.85        | T:0.15  |             |
| chr28          | 10046511 | 2 | 38 | C:1           | CAA:0   |             |
| chr28          | 10046531 | 2 | 36 | A:1           | G:0     |             |
| chr28          | 10046533 | 2 | 36 | AC:0.361111   |         | A:0.638889  |
| chr28          | 10046770 | 2 | 38 | C:0.368421    |         | T:0.631579  |
| chr28          | 10046871 | 2 | 38 | T:1           | C:0     |             |
| chr28          | 10046949 | 2 | 40 | C:1           | T:0     |             |
| chr28          | 10047007 | 2 | 36 | C:1           | T:0     |             |
| chr28          | 10047016 | 2 | 38 | GAA:1         | G:0     |             |
| chr28          | 10047087 | 2 | 40 | T:1           | TG:0    |             |
| chr28          | 10047088 | 2 | 40 | G:0.8         | GT:0.2  |             |
| chr28          | 10047278 | 2 | 38 | T:0.342105    |         | C:0.657895  |
| chr28          | 10047881 | 2 | 36 | G:1           | A:0     |             |
| chr28          | 10049508 | 2 | 40 | G:1           | T:0     |             |
| chr28          | 10049599 | 2 | 36 | CTT:0.5       | C:0.5   |             |
| chr28          | 10050396 | 2 | 38 | T:1           | C:0     |             |
| chr28          | 10051303 | 2 | 40 | G:1           | A:0     |             |
| chr28          | 10052597 | 2 | 36 | G:0.166667    |         | T:0.833333  |
| chr28          | 10052665 | 2 | 40 | T:0.175       | G:0.825 |             |

|                |          |   |    |                |             |             |
|----------------|----------|---|----|----------------|-------------|-------------|
| chr28          | 10054158 | 2 | 40 | T:0.45         | TA:0.55     |             |
| chr28          | 10054168 | 2 | 40 | C:0.45         | A:0.55      |             |
| chr28          | 10054326 | 2 | 40 | A:0.55         | T:0.45      |             |
| chr28          | 10054423 | 2 | 34 | C:0.441176     |             | T:0.558824  |
| chr28          | 10054475 | 2 | 36 | A:0.388889     |             | C:0.611111  |
| chr28          | 10055778 | 2 | 38 | A:0.578947     |             | G:0.421053  |
| chr28          | 10057013 | 2 | 38 | G:1            | A:0         |             |
| chr28          | 10057327 | 2 | 40 | C:0.55         | CTG:0.45    |             |
| chr28          | 10057799 | 2 | 38 | T:1            | G:0         |             |
| chr28          | 10058016 | 2 | 38 | T:0.5          | C:0.5       |             |
| chr28          | 10058393 | 2 | 36 | G:1            | A:0         |             |
| chr28          | 10058485 | 2 | 40 | A:0.4          | T:0.6       |             |
| chr28          | 10059372 | 3 | 40 | C:0.525        | CA:0.4      | CAA:0.075   |
| chr28          | 10060023 | 2 | 40 | G:1            | T:0         |             |
| chr28          | 10060123 | 2 | 40 | T:0.425        | C:0.575     |             |
| chr28          | 10060126 | 2 | 38 | AT:0.894737    |             | A:0.105263  |
| chr28          | 10060315 | 2 | 40 | AG:1           | A:0         |             |
| chr28          | 10060710 | 2 | 38 | A:0.526316     |             | G:0.473684  |
| chr28          | 10061091 | 2 | 36 | G:0.5          | A:0.5       |             |
| chr28          | 10061284 | 3 | 38 | TA:0.763158    |             | T:0.184211  |
| TAAA:0.0526316 |          |   |    |                |             |             |
| chr28          | 10061832 | 2 | 38 | T:0.684211     |             | TA:0.315789 |
| chr28          | 10061836 | 2 | 34 | AAATTAATT:1    |             | A:0         |
| chr28          | 10061840 | 2 | 38 | T:0.736842     |             | A:0.263158  |
| chr28          | 10061883 | 2 | 36 | C:1            | T:0         |             |
| chr28          | 10062552 | 2 | 38 | T:0.973684     |             | C:0.0263158 |
| chr28          | 10062726 | 2 | 38 | GT:0.447368    |             | G:0.552632  |
| chr28          | 10062863 | 2 | 40 | T:0            | C:1         |             |
| chr28          | 10063276 | 2 | 40 | A:1            | AAT:0       |             |
| chr28          | 10063583 | 2 | 40 | T:0.45         | C:0.55      |             |
| chr28          | 10064160 | 2 | 36 | GT:0.805556    |             | G:0.194444  |
| chr28          | 10064204 | 2 | 38 | C:0.5          | CAGAGAG:0.5 |             |
| chr28          | 10064491 | 2 | 40 | A:0.5          | G:0.5       |             |
| chr28          | 10064587 | 2 | 36 | T:1            | TA:0        |             |
| chr28          | 10064593 | 2 | 36 | AT:0.638889    |             | A:0.361111  |
| chr28          | 10064594 | 2 | 36 | T:1            | A:0         |             |
| chr28          | 10064752 | 2 | 40 | C:0.375        | A:0.625     |             |
| chr28          | 10065578 | 2 | 38 | A:0.552632     |             | G:0.447368  |
| chr28          | 10065761 | 2 | 40 | G:1            | A:0         |             |
| chr28          | 10065988 | 2 | 38 | C:0.631579     |             | T:0.368421  |
| chr28          | 10066201 | 2 | 38 | TA:0.447368    |             | T:0.552632  |
| chr28          | 10066680 | 2 | 36 | GT:1           | G:0         |             |
| chr28          | 10066743 | 2 | 40 | A:0.475        | G:0.525     |             |
| chr28          | 10066979 | 2 | 38 | C:1            | T:0         |             |
| chr28          | 10067114 | 2 | 36 | C:0.361111     |             | T:0.638889  |
| chr28          | 10067307 | 2 | 40 | G:0.95         | A:0.05      |             |
| chr28          | 10067941 | 2 | 40 | T:1            | G:0         |             |
| chr28          | 10067961 | 2 | 40 | T:1            | A:0         |             |
| chr28          | 10068042 | 2 | 40 | A:0.425        | G:0.575     |             |
| chr28          | 10068636 | 2 | 36 | T:0.666667     |             | C:0.333333  |
| chr28          | 10069175 | 2 | 36 | G:0.666667     |             | GA:0.333333 |
| chr28          | 10069892 | 2 | 36 | T:0.0833333    |             | C:0.916667  |
| chr28          | 10070151 | 2 | 36 | C:1            | T:0         |             |
| chr28          | 10070483 | 3 | 38 | CAAAA:0.842105 | C:0         | CAAAA:      |

0.157895

|                         |          |   |    |                     |             |                |       |
|-------------------------|----------|---|----|---------------------|-------------|----------------|-------|
| chr28                   | 10070487 | 2 | 38 | A:1                 | C:0         |                |       |
| chr28                   | 10070720 | 2 | 36 | G:1                 | GT:0        |                |       |
| chr28                   | 10070728 | 2 | 36 | C:1                 | CT:0        |                |       |
| chr28                   | 10070746 | 2 | 38 | A:1                 | T:0         |                |       |
| chr28                   | 10070777 | 2 | 36 | C:1                 | CAG:0       |                |       |
| chr28                   | 10070843 | 2 | 38 | G:0.842105          |             | A:0.157895     |       |
| chr28                   | 10070878 | 2 | 40 | GGCTAAAGCGGC:0.9    |             |                | G:0.1 |
| chr28                   | 10070947 | 2 | 38 | G:1                 | A:0         |                |       |
| chr28                   | 10071041 | 2 | 40 | G:0.5               | A:0.5       |                |       |
| chr28                   | 10071202 | 2 | 40 | G:1                 | A:0         |                |       |
| chr28                   | 10071317 | 2 | 36 | GA:1                | G:0         |                |       |
| chr28                   | 10071810 | 2 | 40 | A:0.975             | T:0.025     |                |       |
| chr28                   | 10072480 | 2 | 38 | G:1                 | A:0         |                |       |
| chr28                   | 10072523 | 2 | 38 | AT:1                | A:0         |                |       |
| chr28                   | 10072534 | 2 | 38 | AT:1                | A:0         |                |       |
| chr28                   | 10072535 | 2 | 38 | T:1                 | A:0         |                |       |
| chr28                   | 10072625 | 2 | 38 | C:1                 | G:0         |                |       |
| chr28                   | 10072630 | 2 | 38 | C:1                 | T:0         |                |       |
| chr28                   | 10072761 | 2 | 40 | A:0.5               | C:0.5       |                |       |
| chr28                   | 10072909 | 2 | 38 | A:0.868421          |             | ATGGG:0.131579 |       |
| chr28                   | 10072913 | 3 | 38 | GTGGA:0.631579      |             | G:0.342105     |       |
| GTGGATGGATGGA:0.0263158 |          |   |    |                     |             |                |       |
| chr28                   | 10072942 | 3 | 40 | T:1                 | TGGAAGGAA:0 |                |       |
| TGGATGGATGGAAGGAA:0     |          |   |    |                     |             |                |       |
| chr28                   | 10072989 | 2 | 40 | C:1                 | T:0         |                |       |
| chr28                   | 10073256 | 2 | 40 | C:1                 | A:0         |                |       |
| chr28                   | 10073257 | 2 | 40 | T:1                 | TA:0        |                |       |
| chr28                   | 10073634 | 2 | 30 | G:1                 | A:0         |                |       |
| chr28                   | 10073742 | 2 | 30 | G:1                 | C:0         |                |       |
| chr28                   | 10074158 | 2 | 38 | C:1                 | G:0         |                |       |
| chr28                   | 10074162 | 2 | 40 | G:1                 | A:0         |                |       |
| chr28                   | 10074844 | 2 | 40 | T:1                 | C:0         |                |       |
| chr28                   | 10075230 | 2 | 40 | C:1                 | T:0         |                |       |
| chr28                   | 10075314 | 3 | 40 | CTT:0.6             | C:0.05      | CT:0.35        |       |
| chr28                   | 10075364 | 2 | 30 | G:0.866667          |             | GT:0.133333    |       |
| chr28                   | 10075629 | 2 | 40 | C:1                 | A:0         |                |       |
| chr28                   | 10075750 | 2 | 40 | G:1                 | A:0         |                |       |
| chr28                   | 10076043 | 2 | 40 | C:1                 | T:0         |                |       |
| chr28                   | 10076045 | 2 | 40 | T:1                 | A:0         |                |       |
| chr28                   | 10076129 | 2 | 40 | T:1                 | C:0         |                |       |
| chr28                   | 10076485 | 2 | 38 | T:1                 | C:0         |                |       |
| chr28                   | 10076686 | 2 | 34 | G:1                 | A:0         |                |       |
| chr28                   | 10076703 | 2 | 36 | G:0.472222          |             | A:0.527778     |       |
| chr28                   | 10076850 | 2 | 40 | C:1                 | T:0         |                |       |
| chr28                   | 10076853 | 2 | 40 | T:1                 | C:0         |                |       |
| chr28                   | 10076907 | 2 | 40 | C:1                 | T:0         |                |       |
| chr28                   | 10077169 | 2 | 40 | C:1                 | T:0         |                |       |
| chr28                   | 10077236 | 2 | 40 | A:1                 | AT:0        |                |       |
| chr28                   | 10077237 | 2 | 40 | T:1                 | TA:0        |                |       |
| chr28                   | 10077324 | 2 | 40 | TG:1                | T:0         |                |       |
| chr28                   | 10078138 | 2 | 40 | C:1                 | T:0         |                |       |
| chr28                   | 10078199 | 2 | 34 | G:1                 | A:0         |                |       |
| chr28                   | 10078207 | 3 | 40 | TAAAAAATAAATAAATA:1 |             |                | T:0   |



TAATAAATA:0  
 chr28 10078210 5 40 AAAATAAATAAATAAAT:0.425 A:0.05  
 AAAATAAAT:0.5 AAAATAAATAAAT:0 TAAATAAATAAATAAAT:0.025  
 chr28 10078261 2 40 AT:1 A:0  
 chr28 10078263 2 40 AAAT:1 A:0  
 chr28 10078526 2 38 C:1 T:0  
 chr28 10079795 2 40 T:1 C:0  
 chr28 10080015 2 40 CTG:1 C:0  
 chr28 10080029 2 40 A:0.5 G:0.5  
 chr28 10080379 2 38 TA:1 T:0  
 chr28 10080459 2 36 CCGA:1 C:0  
 chr28 10080475 2 36 C:1 T:0  
 chr28 10080691 2 38 C:1 T:0  
 chr28 10080746 2 36 G:1 A:0  
 chr28 10080917 3 40 GCA:0.75 G:0.05 GCACA:0.2  
 chr28 10081526 2 40 G:0.475 A:0.525  
 chr28 10081739 2 38 C:0.552632 CTTCTGAA:0.447368  
 chr28 10081788 2 38 A:0.552632 G:0.447368  
 chr28 10082157 2 40 CAGAGAGAGAG:0.6 C:0.4  
 chr28 10082780 3 40 CAAATAAATAAATAAATAAATAAAT:0.125  
 C:0.375 CAAATAAAT:0.5  
 chr28 10082898 2 24 A:0.416667 AGGAG:0.583333  
 chr28 10084653 2 40 C:1 A:0  
 chr28 10084683 2 40 C:0.525 G:0.475  
 chr28 10084892 2 38 G:0.552632 T:0.447368  
 chr28 10085050 2 40 T:0.6 C:0.4  
 chr28 10085104 2 40 G:0.625 A:0.375  
 chr28 10085310 2 30 CT:0.866667 C:0.133333  
 chr28 10085343 2 32 C:0.25 CT:0.75  
 chr28 10086152 2 36 T:0.527778 C:0.472222  
 chr28 10086243 2 40 C:0.625 T:0.375  
 chr28 10086541 2 38 C:1 A:0  
 chr28 10086599 2 40 C:0.725 CCT:0.275  
 chr28 10086657 2 40 T:0.525 TA:0.475  
 chr28 10086958 2 40 C:0.55 G:0.45  
 chr28 10087380 2 30 CTT:0.9 C:0.1  
 chr28 10087430 2 36 C:0.666667 CAG:0.333333  
 chr28 10089009 2 34 GCT:0.470588 G:0.529412  
 chr28 10089396 3 38 CCTCTCTCT:0.552632 C:  
 0.157895 CCT:0.289474  
 chr28 10089464 2 38 A:0.526316 G:0.473684  
 chr28 10089623 2 28 TA:0.857143 T:0.142857  
 chr28 10089847 3 38 GTCTC:0.526316 G:0.0789474  
 GTC:0.394737  
 chr28 10089900 2 36 A:0.527778 AAAAAG:0.472222  
 chr28 10089994 2 36 T:0.527778 C:0.472222  
 chr28 10090186 2 34 G:0.558824 T:0.441176  
 chr28 10090333 2 34 G:0.558824 A:0.441176  
 chr28 10090414 2 32 CCT:0.71875 C:0.28125  
 chr28 10090458 3 36 A:0.805556 AAAAT:0.0277778  
 AAAATAAAT:0.166667  
 chr28 10090502 5 38 T:0.631579 TAAATA:0.157895  
 TAAATAAATA:0.184211 TAAATAAATAAATA:0.0263158  
 TAAATAAATAAATAAATA:0

|       |               |               |                  |                  |        |
|-------|---------------|---------------|------------------|------------------|--------|
| chr28 | 10091191 2    | 34            | AAAAAAG:0.970588 | A:0.0294118      |        |
| chr28 | 10091192 2    | 34            | AAAAAAG:0.676471 | A:0.323529       |        |
| chr28 | 10091349 2    | 28            | C:0.357143       | A:0.642857       |        |
| chr28 | 10091547 2    | 34            | T:0.558824       | TCC:0.441176     |        |
| chr28 | 10091937 2    | 36            | TTC:0.5          | T:0.5            |        |
| chr28 | 10092104 2    | 40            | C:0.525          | CA:0.475         |        |
| chr28 | 10092126 2    | 40            | T:0.625          | TAAAATA:0.375    |        |
| chr28 | 10092158 2    | 32            | T:1              | TA:0             |        |
| chr28 | 10092160 2    | 40            | A:0.975          | AAAATAAAAT:0.025 |        |
| chr28 | 10092165 2    | 32            | A:1              | AAAT:0           |        |
| chr28 | 10092348 2    | 36            | G:1              | A:0              |        |
| chr28 | 10092577 2    | 40            | A:0.55           | ATAAAT:0.45      |        |
| chr28 | 10092836 2    | 40            | T:0.6            | A:0.4            |        |
| chr28 | 10092850 2    | 40            | C:0.6            | G:0.4            |        |
| chr28 | 10093038 2    | 38            | GT:0.526316      | G:0.473684       |        |
| chr28 | 10093112 2    | 38            | A:0.578947       | AT:0.421053      |        |
| chr28 | 10093364 2    | 38            | A:0.526316       | C:0.473684       |        |
| chr28 | 10093366 2    | 38            | C:0.526316       | T:0.473684       |        |
| chr28 | 10093569 2    | 38            | G:0.631579       | C:0.368421       |        |
| chr28 | 10093578 2    | 38            | G:0.631579       | A:0.368421       |        |
| chr28 | 10093621 2    | 40            | G:0.475          | A:0.525          |        |
| chr28 | 10093670 2    | 40            | T:0.525          | C:0.475          |        |
| chr28 | 10093679 2    | 40            | G:1              | A:0              |        |
| chr28 | 10093886 2    | 40            | C:1              | CGCATT:0         |        |
| chr28 | 10093997 2    | 40            | G:0.55           | A:0.45           |        |
| chr28 | 10094136 2    | 40            | G:0.475          | A:0.525          |        |
| chr28 | 10094540 2    | 40            | C:1              | G:0              |        |
| chr28 | 10094866 2    | 38            | G:1              | GA:0             |        |
| chr28 | 10095524 2    | 8             | C:0.25           | G:0.75           |        |
| chr28 | 10095808 2    | 28            | T:1              | A:0              |        |
| chr28 | 10095961 2    | 38            | C:1              | A:0              |        |
| chr28 | 10096511 5    | 40            | AAC:0.725        | A:0              | AACAC: |
| 0.1   | AACACAC:0.075 | AACACACAC:0.1 |                  |                  |        |
| chr28 | 10096535 2    | 36            | C:1              | CAT:0            |        |
| chr28 | 10096621 2    | 40            | A:1              | G:0              |        |
| chr28 | 10097262 2    | 36            | CA:1             | C:0              |        |
| chr28 | 10098620 2    | 40            | G:1              | A:0              |        |
| chr28 | 10098707 2    | 36            | T:1              | C:0              |        |
| chr28 | 10099037 2    | 40            | G:1              | C:0              |        |
| chr28 | 10099202 2    | 40            | C:1              | T:0              |        |
| chr28 | 10099239 2    | 40            | T:1              | TC:0             |        |
| chr28 | 10099738 2    | 36            | G:1              | T:0              |        |
| chr28 | 10100126 2    | 32            | C:1              | T:0              |        |
| chr28 | 10100782 2    | 32            | T:1              | C:0              |        |
| chr28 | 10100882 2    | 38            | C:0.5            | T:0.5            |        |
| chr28 | 10101917 2    | 38            | T:1              | TA:0             |        |
| chr28 | 10102255 2    | 38            | C:1              | T:0              |        |
| chr28 | 10102743 2    | 40            | T:1              | A:0              |        |
| chr28 | 10103171 2    | 38            | G:1              | A:0              |        |
| chr28 | 10103202 2    | 38            | TA:0.973684      | T:0.0263158      |        |
| chr28 | 10103505 2    | 38            | T:1              | C:0              |        |
| chr28 | 10103578 2    | 38            | T:1              | A:0              |        |
| chr28 | 10103655 2    | 32            | G:1              | A:0              |        |
| chr28 | 10103847 2    | 40            | T:1              | C:0              |        |

|       |          |   |    |                         |               |       |
|-------|----------|---|----|-------------------------|---------------|-------|
| chr28 | 10104001 | 2 | 38 | C:1                     | A:0           |       |
| chr28 | 10104218 | 2 | 40 | T:1                     | C:0           |       |
| chr28 | 10105506 | 2 | 32 | A:0                     | T:1           |       |
| chr28 | 10105512 | 2 | 32 | G:0                     | T:1           |       |
| chr28 | 10105531 | 2 | 38 | C:1                     | T:0           |       |
| chr28 | 10105576 | 2 | 40 | A:1                     | AT:0          |       |
| chr28 | 10105579 | 2 | 40 | A:1                     | T:0           |       |
| chr28 | 10106044 | 2 | 40 | T:1                     | A:0           |       |
| chr28 | 10106203 | 2 | 40 | ACACCCTGGGC:0.95 A:0.05 |               |       |
| chr28 | 10106407 | 2 | 38 | T:1                     | C:0           |       |
| chr28 | 10106817 | 2 | 38 | T:1                     | C:0           |       |
| chr28 | 10107030 | 2 | 40 | T:1                     | C:0           |       |
| chr28 | 10107056 | 2 | 40 | G:1                     | GT:0          |       |
| chr28 | 10107095 | 2 | 38 | A:1                     | G:0           |       |
| chr28 | 10107288 | 2 | 38 | C:1                     | A:0           |       |
| chr28 | 10107430 | 2 | 38 | G:1                     | A:0           |       |
| chr28 | 10107531 | 2 | 38 | T:1                     | A:0           |       |
| chr28 | 10107690 | 2 | 40 | G:1                     | A:0           |       |
| chr28 | 10107722 | 2 | 40 | G:1                     | A:0           |       |
| chr28 | 10108281 | 2 | 36 | A:1                     | C:0           |       |
| chr28 | 10108956 | 2 | 40 | A:0.65                  | T:0.35        |       |
| chr28 | 10109651 | 2 | 38 | T:1                     | A:0           |       |
| chr28 | 10109700 | 2 | 40 | C:0.75                  | G:0.25        |       |
| chr28 | 10110817 | 2 | 40 | C:0.95                  | CT:0.05       |       |
| chr28 | 10111283 | 2 | 38 | G:1                     | T:0           |       |
| chr28 | 10111747 | 2 | 38 | C:1                     | CT:0          |       |
| chr28 | 10112779 | 2 | 40 | T:1                     | A:0           |       |
| chr28 | 10112970 | 2 | 36 | T:1                     | C:0           |       |
| chr28 | 10113257 | 2 | 40 | A:0.525                 | G:0.475       |       |
| chr28 | 10113277 | 2 | 38 | G:1                     | A:0           |       |
| chr28 | 10113438 | 2 | 40 | T:1                     | G:0           |       |
| chr28 | 10113915 | 2 | 40 | A:1                     | G:0           |       |
| chr28 | 10113965 | 2 | 40 | T:1                     | A:0           |       |
| chr28 | 10115385 | 3 | 40 | TAAAA:0.85              | T:0.025       | TAAA: |
|       |          |   |    |                         | 0.125         |       |
| chr28 | 10115597 | 2 | 34 | G:1                     | A:0           |       |
| chr28 | 10115897 | 2 | 38 | C:0.789474              | CGTT:0.210526 |       |
| chr28 | 10116159 | 2 | 36 | CAG:1                   | C:0           |       |
| chr28 | 10116680 | 2 | 38 | G:0.947368              | GA:0.0526316  |       |
| chr28 | 10117651 | 2 | 40 | C:1                     | T:0           |       |
| chr28 | 10117766 | 2 | 36 | C:0.944444              | CT:0.0555556  |       |
| chr28 | 10119515 | 2 | 38 | T:1                     | C:0           |       |
| chr28 | 10119785 | 2 | 40 | G:1                     | A:0           |       |
| chr28 | 10120019 | 2 | 38 | C:1                     | T:0           |       |
| chr28 | 10120177 | 2 | 38 | A:1                     | G:0           |       |
| chr28 | 10120315 | 2 | 40 | G:1                     | A:0           |       |
| chr28 | 10120745 | 2 | 38 | G:1                     | A:0           |       |
| chr28 | 10121284 | 2 | 38 | T:1                     | TTTAC:0       |       |
| chr28 | 10121586 | 2 | 40 | C:1                     | T:0           |       |
| chr28 | 10122715 | 2 | 32 | C:0.53125               | CT:0.46875    |       |
| chr28 | 10122759 | 2 | 36 | G:1                     | C:0           |       |
| chr28 | 10122974 | 2 | 40 | ATCATGATCCCAGG:0.925    | A:0.075       |       |
| chr28 | 10123077 | 2 | 38 | T:1                     | C:0           |       |
| chr28 | 10124051 | 2 | 40 | A:1                     | C:0           |       |

|                     |                 |    |             |                 |               |
|---------------------|-----------------|----|-------------|-----------------|---------------|
| chr28               | 10124215 2      | 38 | C:1         | T:0             |               |
| chr28               | 10124244 2      | 36 | A:0.555556  |                 | AT:0.444444   |
| chr28               | 10124862 2      | 40 | ATT:0.5     | A:0.5           |               |
| chr28               | 10124867 3      | 40 | T:0.5       | TAAA:0.5        | TA:0          |
| chr28               | 10124999 4      | 40 | G:0.475     | GTCTC:0.2       | GTCTCTC:      |
| 0.325               | GTCTCTCTCTCTC:0 |    |             |                 |               |
| chr28               | 10125084 2      | 38 | A:1         | T:0             |               |
| chr28               | 10125493 2      | 38 | C:1         | T:0             |               |
| chr28               | 10125613 2      | 36 | G:0.555556  |                 | A:0.444444    |
| chr28               | 10125652 2      | 36 | A:0.944444  |                 | AT:0.0555556  |
| chr28               | 10125921 2      | 38 | C:1         | G:0             |               |
| chr28               | 10125998 2      | 40 | C:1         | T:0             |               |
| chr28               | 10126072 2      | 38 | AC:1        | A:0             |               |
| chr28               | 10126127 2      | 36 | T:1         | A:0             |               |
| chr28               | 10126138 2      | 36 | T:0.444444  |                 | C:0.555556    |
| chr28               | 10126617 2      | 38 | T:0.605263  |                 | C:0.394737    |
| chr28               | 10126622 2      | 38 | T:1         | C:0             |               |
| chr28               | 10126737 2      | 38 | A:0.605263  |                 | G:0.394737    |
| chr28               | 10127431 2      | 38 | T:1         | TA:0            |               |
| chr28               | 10127853 2      | 38 | G:1         | A:0             |               |
| chr28               | 10127978 2      | 40 | C:0.525     | T:0.475         |               |
| chr28               | 10128193 3      | 38 | T:0.578947  |                 | TA:0.421053   |
| TAA:0               |                 |    |             |                 |               |
| chr28               | 10128339 2      | 40 | A:1         | G:0             |               |
| chr28               | 10128587 2      | 36 | A:0.555556  |                 | G:0.444444    |
| chr28               | 10128663 2      | 36 | G:1         | A:0             |               |
| chr28               | 10128703 2      | 34 | A:0.676471  |                 | G:0.323529    |
| chr28               | 10128796 2      | 36 | A:1         | G:0             |               |
| chr28               | 10128797 2      | 36 | A:0.972222  |                 | G:0.0277778   |
| chr28               | 10129048 2      | 40 | C:0.625     | T:0.375         |               |
| chr28               | 10129091 2      | 40 | T:0.575     | A:0.425         |               |
| chr28               | 10129195 2      | 40 | ATCT:1      | A:0             |               |
| chr28               | 10129258 2      | 40 | AG:1        | A:0             |               |
| chr28               | 10129397 2      | 38 | T:0.605263  |                 | G:0.394737    |
| chr28               | 10129433 2      | 40 | A:0.525     | G:0.475         |               |
| chr28               | 10129449 2      | 40 | G:1         | A:0             |               |
| chr28               | 10129496 2      | 40 | T:0         | G:1             |               |
| chr28               | 10129566 2      | 38 | T:0.552632  |                 | A:0.447368    |
| chr28               | 10129780 4      | 40 | A:0.475     | AGTTGTTGTT:0.05 |               |
| AGTTGTTGTTGTT:0.375 |                 |    |             |                 |               |
| chr28               | 10130205 2      | 36 | C:1         | T:0             |               |
| chr28               | 10130209 2      | 34 | T:0.617647  |                 | C:0.382353    |
| chr28               | 10130249 2      | 34 | C:0.735294  |                 | CCT:0.264706  |
| chr28               | 10130303 2      | 34 | TA:0.970588 |                 | T:0.0294118   |
| chr28               | 10130475 2      | 38 | G:1         | A:0             |               |
| chr28               | 10130573 2      | 32 | G:0.625     | A:0.375         |               |
| chr28               | 10130657 2      | 30 | C:0.933333  |                 | CCT:0.0666667 |
| chr28               | 10130720 2      | 32 | TAA:0.53125 |                 | T:0.46875     |
| chr28               | 10130743 2      | 36 | C:1         | T:0             |               |
| chr28               | 10130774 2      | 40 | A:0         | G:1             |               |
| chr28               | 10130874 2      | 34 | G:0.117647  |                 | C:0.882353    |
| chr28               | 10131021 2      | 38 | T:0         | TA:1            |               |
| chr28               | 10131487 2      | 34 | G:1         | T:0             |               |
| chr28               | 10131492 2      | 34 | T:0.735294  |                 | G:0.264706    |

|       |          |   |    |                                     |                |
|-------|----------|---|----|-------------------------------------|----------------|
| chr28 | 10131505 | 2 | 34 | T:0.735294                          | C:0.264706     |
| chr28 | 10131651 | 2 | 30 | G:0.766667                          | GC:0.233333    |
| chr28 | 10131678 | 2 | 36 | C:1                                 | T:0            |
| chr28 | 10131857 | 2 | 40 | TG:0.625                            | T:0.375        |
| chr28 | 10132020 | 2 | 38 | G:0.526316                          | GT:0.473684    |
| chr28 | 10132022 | 3 | 38 | TC:1                                | T:0            |
| chr28 | 10132439 | 2 | 40 | T:1                                 | C:0            |
| chr28 | 10132652 | 3 | 38 | CT:0.552632                         | C:0            |
|       | 0.447368 |   |    |                                     | CTT:           |
| chr28 | 10132900 | 2 | 34 | C:1                                 | T:0            |
| chr28 | 10133410 | 2 | 36 | T:1                                 | TC:0           |
| chr28 | 10133788 | 2 | 40 | G:0.8                               | GAA:0.2        |
| chr28 | 10133978 | 2 | 32 | T:1                                 | A:0            |
| chr28 | 10134071 | 2 | 34 | C:0.941176                          | T:0.0588235    |
| chr28 | 10134365 | 2 | 32 | A:1                                 | G:0            |
| chr28 | 10134481 | 2 | 26 | G:1                                 | A:0            |
| chr28 | 10134640 | 2 | 34 | AT:1                                | A:0            |
| chr28 | 10134643 | 2 | 34 | AAT:1                               | A:0            |
| chr28 | 10134645 | 2 | 32 | TA:0.25                             | T:0.75         |
| chr28 | 10134653 | 2 | 34 | A:1                                 | T:0            |
| chr28 | 10134828 | 2 | 30 | C:1                                 | T:0            |
| chr28 | 10136462 | 2 | 40 | C:1                                 | T:0            |
| chr28 | 10136854 | 2 | 36 | T:1                                 | C:0            |
| chr28 | 10137070 | 2 | 40 | GAAAAAGAAAACCAAAAAAAAAAAAAAAAAAAAA: |                |
|       | 0.65     |   |    | G:0.35                              |                |
| chr28 | 10137137 | 2 | 34 | G:1                                 | A:0            |
| chr28 | 10137644 | 2 | 36 | G:1                                 | A:0            |
| chr28 | 10137692 | 2 | 36 | C:0.5                               | T:0.5          |
| chr28 | 10137697 | 2 | 38 | T:0.552632                          | A:0.447368     |
| chr28 | 10137774 | 2 | 36 | C:0.638889                          | CCTCT:0.361111 |
| chr28 | 10137795 | 2 | 34 | C:1                                 | CTG:0          |
| chr28 | 10138143 | 2 | 38 | A:0.631579                          | G:0.368421     |
| chr28 | 10138144 | 2 | 38 | T:0.631579                          | A:0.368421     |
| chr28 | 10138331 | 2 | 38 | T:1                                 | C:0            |
| chr28 | 10138822 | 2 | 38 | C:0.526316                          | G:0.473684     |
| chr28 | 10138986 | 2 | 40 | G:0.475                             | A:0.525        |
| chr28 | 10139094 | 2 | 38 | T:1                                 | A:0            |
| chr28 | 10139240 | 2 | 40 | T:1                                 | C:0            |
| chr28 | 10139597 | 2 | 40 | A:1                                 | C:0            |
| chr28 | 10139797 | 2 | 38 | G:0.947368                          | A:0.0526316    |
| chr28 | 10140077 | 2 | 38 | C:0                                 | G:1            |
| chr28 | 10140097 | 2 | 38 | AG:0                                | A:1            |
| chr28 | 10140385 | 3 | 38 | TA:0.552632                         | T:0.447368     |
| TAA:0 |          |   |    |                                     |                |
| chr28 | 10140474 | 2 | 36 | G:1                                 | A:0            |
| chr28 | 10140533 | 2 | 32 | ATC:0.625                           | A:0.375        |
| chr28 | 10140599 | 2 | 38 | T:0.157895                          | A:0.842105     |
| chr28 | 10140961 | 2 | 38 | C:0.5                               | T:0.5          |
| chr28 | 10141158 | 2 | 40 | G:1                                 | T:0            |
| chr28 | 10141522 | 2 | 38 | G:1                                 | A:0            |
| chr28 | 10141979 | 2 | 38 | G:0.578947                          | A:0.421053     |
| chr28 | 10142270 | 2 | 38 | G:1                                 | A:0            |
| chr28 | 10142335 | 2 | 38 | T:1                                 | C:0            |
| chr28 | 10142667 | 2 | 38 | G:0.815789                          | A:0.184211     |

|                                                |            |    |                  |             |
|------------------------------------------------|------------|----|------------------|-------------|
| chr28                                          | 10142776 2 | 32 | CCT:0.6875       | C:0.3125    |
| chr28                                          | 10142881 2 | 40 | T:1 G:0          |             |
| chr28                                          | 10143149 2 | 40 | T:0.6 A:0.4      |             |
| chr28                                          | 10143281 2 | 38 | G:1 A:0          |             |
| chr28                                          | 10143371 2 | 38 | C:1 T:0          |             |
| chr28                                          | 10143432 2 | 40 | A:1 T:0          |             |
| chr28                                          | 10143856 2 | 38 | A:1 G:0          |             |
| chr28                                          | 10144051 2 | 40 | G:1 A:0          |             |
| chr28                                          | 10144301 2 | 38 | T:0.473684       | C:0.526316  |
| chr28                                          | 10144486 2 | 38 | A:1 G:0          |             |
| chr28                                          | 10144544 2 | 38 | CCT:0.473684     | C:0.526316  |
| chr28                                          | 10144548 2 | 40 | T:0.95           |             |
| TCTCTCTCTCTCTCTGCTTCTCCCTCTGCCTGTGTCTCTGC:0.05 |            |    |                  |             |
| chr28                                          | 10144605 2 | 38 | TA:0.973684      | T:0.0263158 |
| chr28                                          | 10144851 2 | 40 | G:1 A:0          |             |
| chr28                                          | 10145459 2 | 38 | C:0 CTA:1        |             |
| chr28                                          | 10145579 2 | 40 | T:1 G:0          |             |
| chr28                                          | 10145854 2 | 40 | T:0 C:1          |             |
| chr28                                          | 10145985 2 | 38 | G:1 T:0          |             |
| chr28                                          | 10145992 2 | 38 | T:1 C:0          |             |
| chr28                                          | 10146039 2 | 40 | GGTGT:0.975      | G:0.025     |
| chr28                                          | 10146058 2 | 40 | G:0.55 GTA:0.45  |             |
| chr28                                          | 10146103 2 | 38 | T:1 C:0          |             |
| chr28                                          | 10146246 2 | 40 | A:0.7 G:0.3      |             |
| chr28                                          | 10146279 2 | 40 | T:0.95 C:0.05    |             |
| chr28                                          | 10147010 2 | 40 | G:0.425 C:0.575  |             |
| chr28                                          | 10147135 2 | 38 | G:0.0526316      | C:0.947368  |
| chr28                                          | 10147191 2 | 38 | T:0.657895       | G:0.342105  |
| chr28                                          | 10147472 2 | 38 | A:0.947368       | G:0.0526316 |
| chr28                                          | 10147807 2 | 38 | T:0.0526316      | TC:0.947368 |
| chr28                                          | 10148232 2 | 36 | GA:0.527778      | G:0.472222  |
| chr28                                          | 10148242 2 | 36 | AGAG:0.527778    | A:0.472222  |
| chr28                                          | 10148245 3 | 40 | GAAGA:1 G:0      | GAAGAAAGA:0 |
| chr28                                          | 10148288 2 | 38 | GAA:0.894737     | G:0.105263  |
| chr28                                          | 10148294 2 | 28 | AAG:0.321429     | A:0.678571  |
| chr28                                          | 10148300 2 | 32 | GAA:0.3125       | G:0.6875    |
| chr28                                          | 10148412 2 | 40 | C:0.95 T:0.05    |             |
| chr28                                          | 10149146 2 | 38 | T:0.0263158      | G:0.973684  |
| chr28                                          | 10149410 2 | 40 | A:0.575 G:0.425  |             |
| chr28                                          | 10149449 2 | 38 | G:0.763158       | T:0.236842  |
| chr28                                          | 10149841 2 | 38 | C:0.552632       | CT:0.447368 |
| chr28                                          | 10149893 2 | 40 | A:0.55 T:0.45    |             |
| chr28                                          | 10149980 2 | 38 | C:0.657895       | T:0.342105  |
| chr28                                          | 10149999 2 | 38 | G:1 C:0          |             |
| chr28                                          | 10150042 2 | 36 | T:1 C:0          |             |
| chr28                                          | 10150292 2 | 40 | A:0.45 T:0.55    |             |
| chr28                                          | 10150297 2 | 40 | G:1 T:0          |             |
| chr28                                          | 10150322 2 | 40 | C:1 T:0          |             |
| chr28                                          | 10150341 2 | 38 | AT:0.631579      | A:0.368421  |
| chr28                                          | 10150377 4 | 40 | CAG:0.65 C:0.35  | CAGAGAGAG:0 |
| CAGAGAGAGAG:0                                  |            |    |                  |             |
| chr28                                          | 10150480 2 | 40 | A:1 ACATCCTGAG:0 |             |
| chr28                                          | 10150723 2 | 38 | CCTTAT:0.631579  | C:0.368421  |
| chr28                                          | 10150822 2 | 40 | C:1 A:0          |             |

|                                                                       |          |   |    |                           |                     |
|-----------------------------------------------------------------------|----------|---|----|---------------------------|---------------------|
| chr28                                                                 | 10150902 | 2 | 40 | A:0.05                    | T:0.95              |
| chr28                                                                 | 10150992 | 2 | 40 | C:0.05                    | A:0.95              |
| chr28                                                                 | 10151037 | 2 | 38 | G:0.0526316               | T:0.947368          |
| chr28                                                                 | 10151226 | 2 | 36 | G:0.388889                | A:0.611111          |
| chr28                                                                 | 10151411 | 2 | 34 | T:0.588235                | C:0.411765          |
| chr28                                                                 | 10151543 | 2 | 40 | AT:0.65                   | A:0.35              |
| chr28                                                                 | 10152372 | 2 | 36 | C:0.0555556               | T:0.944444          |
| chr28                                                                 | 10152413 | 4 | 38 | TAA:0.263158              | T:0.315789          |
| TA:0.210526                                                           |          |   |    | TAAA:0.210526             |                     |
| chr28                                                                 | 10152907 | 2 | 38 | GA:0.368421               | G:0.631579          |
| chr28                                                                 | 10153343 | 2 | 38 | G:0.473684                | A:0.526316          |
| chr28                                                                 | 10153365 | 2 | 38 | C:0.789474                | T:0.210526          |
| chr28                                                                 | 10153418 | 2 | 38 | C:0.447368                | A:0.552632          |
| chr28                                                                 | 10153642 | 2 | 36 | C:1                       | T:0                 |
| chr28                                                                 | 10153904 | 2 | 38 | G:0.0526316               | A:0.947368          |
| chr28                                                                 | 10153945 | 2 | 38 | GTC:0.947368              | G:0.0526316         |
| chr28                                                                 | 10153996 | 2 | 36 | T:0.722222                | C:0.277778          |
| chr28                                                                 | 10154047 | 2 | 34 | A:0.676471                | G:0.323529          |
| chr28                                                                 | 10154104 | 2 | 36 | A:0.861111                | T:0.138889          |
| chr28                                                                 | 10154196 | 2 | 26 | C:0.461538                | CCT:0.538462        |
| chr28                                                                 | 10154306 | 2 | 38 | C:0.578947                | A:0.421053          |
| chr28                                                                 | 10154338 | 2 | 40 | C:0.475                   |                     |
| CCAAAAAAAAAACAAAAAAAAACAAAAAAAAATAATTAAAAAAAAAAAAAAAAAAAAAAAAAA:0.525 |          |   |    |                           |                     |
| chr28                                                                 | 10154339 | 2 | 40 | G:0.475                   | GAACCTGCCTTCC:0.525 |
| chr28                                                                 | 10154461 | 3 | 38 | T:0.0526316               | TA:0.526316         |
| TAA:0.421053                                                          |          |   |    |                           |                     |
| chr28                                                                 | 10154689 | 2 | 40 | C:0.5                     | G:0.5               |
| chr28                                                                 | 10154839 | 2 | 38 | CCTCT:0.157895            | C:0.842105          |
| chr28                                                                 | 10154898 | 3 | 40 | CA:0.525                  | C:0.4               |
| chr28                                                                 | 10155088 | 2 | 34 | TAAAAGTTTTTAAAAA:0.764706 | T:0.235294          |
| 0.235294                                                              |          |   |    |                           |                     |
| chr28                                                                 | 10155093 | 2 | 36 | GTTTTTAAAAAAAAGT:0.972222 |                     |
| G:0.0277778                                                           |          |   |    |                           |                     |
| chr28                                                                 | 10155179 | 2 | 38 | G:0.763158                | GA:0.236842         |
| chr28                                                                 | 10155187 | 2 | 38 | T:0.947368                | A:0.0526316         |
| chr28                                                                 | 10155196 | 2 | 38 | T:0.947368                | A:0.0526316         |
| chr28                                                                 | 10155249 | 2 | 34 | T:0.911765                | C:0.0882353         |
| chr28                                                                 | 10155371 | 2 | 36 | G:0.611111                | C:0.388889          |
| chr28                                                                 | 10155420 | 2 | 34 | A:0.617647                | T:0.382353          |
| chr28                                                                 | 10155466 | 2 | 34 | ATC:0.941176              | A:0.0588235         |
| chr28                                                                 | 10155468 | 2 | 34 | CTCT:0.676471             | C:0.323529          |
| chr28                                                                 | 10155470 | 2 | 34 | C:0.382353                | T:0.617647          |
| chr28                                                                 | 10155496 | 2 | 34 | T:0.676471                | TGATA:0.323529      |
| chr28                                                                 | 10155500 | 2 | 34 | ACT:0.676471              | A:0.323529          |
| chr28                                                                 | 10155509 | 2 | 34 | GAC:0.676471              | G:0.323529          |
| chr28                                                                 | 10155611 | 2 | 40 | GC:0                      | G:1                 |
| chr28                                                                 | 10155632 | 2 | 30 | T:0.0666667               | C:0.933333          |
| chr28                                                                 | 10155666 | 2 | 36 | T:0.722222                | TA:0.277778         |
| chr28                                                                 | 10155667 | 3 | 36 | T:0                       | A:0.277778          |
| 0.722222                                                              |          |   |    | TA:                       |                     |
| chr28                                                                 | 10155678 | 2 | 36 | T:0                       | TA:1                |
| chr28                                                                 | 10155975 | 2 | 36 | C:0.611111                | CTAA:0.388889       |
| chr28                                                                 | 10156113 | 2 | 38 | C:0.0526316               | A:0.947368          |
| chr28                                                                 | 10156169 | 2 | 40 | AAATT:0.975               | A:0.025             |

|                                                                               |          |   |    |                    |                           |
|-------------------------------------------------------------------------------|----------|---|----|--------------------|---------------------------|
| chr28                                                                         | 10156261 | 2 | 38 | T:0.421053         | C:0.578947                |
| chr28                                                                         | 10156606 | 2 | 38 | G:0.710526         | A:0.289474                |
| chr28                                                                         | 10156658 | 2 | 26 | C:0.0384615        | CT:0.961538               |
| chr28                                                                         | 10156835 | 2 | 30 | G:0.1              | A:0.9                     |
| chr28                                                                         | 10156897 | 2 | 32 | T:0                | C:1                       |
| chr28                                                                         | 10157052 | 2 | 28 | T:1                | TA:0                      |
| chr28                                                                         | 10157058 | 4 | 28 | T:1                | TTTTA:0 TTA:0             |
| TTTTATTTATTTA:0                                                               |          |   |    |                    |                           |
| chr28                                                                         | 10157251 | 2 | 30 | C:0.833333         |                           |
| CTATATGAGTAAAACCTTTACAATATTTCTGAAAGATCCAAAAATAGACTGGATCCATCGATAA:<br>0.166667 |          |   |    |                    |                           |
| chr28                                                                         | 10157831 | 3 | 22 | TA:0.136364        | T:0.863636                |
| TAA:0                                                                         |          |   |    |                    |                           |
| chr28                                                                         | 10158165 | 2 | 38 | GTGTC:0.947368     | G:0.0526316               |
| chr28                                                                         | 10158167 | 3 | 40 | GTCTCTCTC:0.55     | G:0.275 GTCTCTC:<br>0.175 |
| chr28                                                                         | 10158232 | 3 | 38 | TAAAAA:0.526316    | TA:0.105263               |
| T:0.368421                                                                    |          |   |    |                    |                           |
| chr28                                                                         | 10158238 | 2 | 36 | A:0.611111         | ATT:0.388889              |
| chr28                                                                         | 10158290 | 2 | 36 | A:0.611111         | AG:0.388889               |
| chr28                                                                         | 10158392 | 2 | 36 | T:0.5              | C:0.5                     |
| chr28                                                                         | 10158447 | 2 | 36 | CT:0.611111        | C:0.388889                |
| chr28                                                                         | 10158486 | 2 | 34 | T:0.970588         | TAC:0.0294118             |
| chr28                                                                         | 10158490 | 3 | 40 | C:0.8              | CAGAGAGAGAGAG:0.15        |
| CAGAGAGAGAGAGAG:0.05                                                          |          |   |    |                    |                           |
| chr28                                                                         | 10158492 | 2 | 36 | G:1                | C:0                       |
| chr28                                                                         | 10158537 | 2 | 38 | G:0.447368         | T:0.552632                |
| chr28                                                                         | 10158667 | 2 | 36 | A:0.611111         | G:0.388889                |
| chr28                                                                         | 10159009 | 2 | 38 | G:0.447368         | A:0.552632                |
| chr28                                                                         | 10159257 | 2 | 40 | G:1                | GA:0                      |
| chr28                                                                         | 10159626 | 2 | 40 | A:0.95             | T:0.05                    |
| chr28                                                                         | 10159654 | 2 | 38 | T:0.578947         | A:0.421053                |
| chr28                                                                         | 10159695 | 2 | 40 | T:0.95             | C:0.05                    |
| chr28                                                                         | 10159868 | 2 | 32 | C:0.84375          | CT:0.15625                |
| chr28                                                                         | 10159995 | 2 | 28 | C:1                | T:0                       |
| chr28                                                                         | 10160300 | 2 | 40 | C:0.525            | T:0.475                   |
| chr28                                                                         | 10160324 | 2 | 40 | C:0.725            | T:0.275                   |
| chr28                                                                         | 10160325 | 2 | 40 | G:0.525            | T:0.475                   |
| chr28                                                                         | 10160674 | 2 | 36 | C:0.0555556        | A:0.944444                |
| chr28                                                                         | 10161160 | 2 | 40 | A:1                | G:0                       |
| chr28                                                                         | 10161412 | 2 | 40 | TAATTTATA:0.5      | T:0.5                     |
| chr28                                                                         | 10161423 | 2 | 40 | GA:1               | G:0                       |
| chr28                                                                         | 10161772 | 2 | 40 | TTC:0.65           | T:0.35                    |
| chr28                                                                         | 10161810 | 2 | 40 | CTGTGTGTGTGTG:0.35 | C:0.65                    |
| chr28                                                                         | 10161852 | 2 | 38 | T:0.842105         | A:0.157895                |
| chr28                                                                         | 10161975 | 2 | 40 | C:0.575            | A:0.425                   |
| chr28                                                                         | 10162099 | 2 | 26 | TCA:0.461538       | T:0.538462                |
| chr28                                                                         | 10162212 | 2 | 38 | CACTT:0.552632     | C:0.447368                |
| chr28                                                                         | 10162302 | 4 | 38 | C:0.0526316        | CT:0.421053               |
| CTT:0.473684 CTTT:0.0526316                                                   |          |   |    |                    |                           |
| chr28                                                                         | 10162453 | 2 | 34 | C:0.5              | T:0.5                     |
| chr28                                                                         | 10162530 | 2 | 38 | A:0.605263         | G:0.394737                |
| chr28                                                                         | 10162553 | 2 | 40 | C:1                | A:0                       |
| chr28                                                                         | 10162727 | 2 | 40 | G:1                | A:0                       |



|       |                          |    |                |                       |               |
|-------|--------------------------|----|----------------|-----------------------|---------------|
| chr28 | 10162764 2               | 40 | A:0.5          | G:0.5                 |               |
| chr28 | 10162876 3               | 40 | T:0.4          | TAAA:0.225            | TAAAA:        |
|       | 0.375                    |    |                |                       |               |
| chr28 | 10162901 2               | 40 | T:0.575        | A:0.425               |               |
| chr28 | 10163470 2               | 26 | G:0.961538     | T:0.0384615           |               |
| chr28 | 10164070 2               | 38 | GTCTC:0.894737 | G:0.105263            |               |
| chr28 | 10164099 2               | 36 | TCTG:0.972222  | T:0.0277778           |               |
| chr28 | 10164101 4               | 40 | T:0.75         | TC:0.225              | TCTCTC:0.025  |
|       | TCTCTCTCTCTCTC:0         |    |                |                       |               |
| chr28 | 10164102 2               | 36 | G:0.722222     | T:0.277778            |               |
| chr28 | 10164474 2               | 40 | G:0.4          | A:0.6                 |               |
| chr28 | 10164559 2               | 40 | A:1            | AGCGCC:0              |               |
| chr28 | 10164587 2               | 38 | C:0.710526     | T:0.289474            |               |
| chr28 | 10164611 2               | 38 | C:0.789474     | T:0.210526            |               |
| chr28 | 10164666 2               | 38 | C:0.421053     | G:0.578947            |               |
| chr28 | 10164669 2               | 38 | TCTTC:0.684211 | T:0.315789            |               |
| chr28 | 10164671 3               | 40 | TTCGTTTC:0.35  | T:0.55                | TGTTTC:       |
|       | 0.1                      |    |                |                       |               |
| chr28 | 10164675 2               | 38 | T:0.578947     | TC:0.421053           |               |
| chr28 | 10164677 2               | 38 | C:0.578947     | CT:0.421053           |               |
| chr28 | 10164702 2               | 34 | A:0            | AG:1                  |               |
| chr28 | 10164787 2               | 38 | C:0.947368     | G:0.0526316           |               |
| chr28 | 10164880 2               | 40 | G:0.3          | A:0.7                 |               |
| chr28 | 10165039 2               | 40 | TCATG:0.4      | T:0.6                 |               |
| chr28 | 10165148 3               | 40 | T:0.15         | TTCTCTCTCTCTCTCTC:0.3 |               |
|       | TTCTCTCTCTCTCTCTCTC:0.55 |    |                |                       |               |
| chr28 | 10165184 4               | 36 | TAAA:0.194444  | T:0.555556            |               |
|       | TA:0.222222              |    |                |                       |               |
|       | TAA:0.0277778            |    |                |                       |               |
| chr28 | 10165347 2               | 24 | C:0.25         | CA:0.75               |               |
| chr28 | 10165388 2               | 36 | C:0.694444     | T:0.305556            |               |
| chr28 | 10165697 2               | 38 | G:0.921053     | A:0.0789474           |               |
| chr28 | 10165799 2               | 38 | C:0.631579     | A:0.368421            |               |
| chr28 | 10165856 2               | 40 | A:0.925        | G:0.075               |               |
| chr28 | 10166000 2               | 38 | C:0.921053     | T:0.0789474           |               |
| chr28 | 10166114 2               | 32 | T:0.6875       | TG:0.3125             |               |
| chr28 | 10166115 3               | 34 | GTTT:0.764706  | G:0.0294118           |               |
|       | GTT:0.205882             |    |                |                       |               |
| chr28 | 10166116 2               | 38 | T:1            | TGG:0                 |               |
| chr28 | 10166119 2               | 32 | T:1            | G:0                   |               |
| chr28 | 10166202 2               | 36 | G:0.916667     | A:0.0833333           |               |
| chr28 | 10166217 2               | 36 | T:0.916667     | C:0.0833333           |               |
| chr28 | 10166314 3               | 40 | TGA:0.85       | T:0.125               | TGAGAGA:0.025 |
| chr28 | 10166335 2               | 40 | GA:0.925       | G:0.075               |               |
| chr28 | 10166338 2               | 40 | AGAGGC:0.925   | A:0.075               |               |
| chr28 | 10166523 2               | 40 | G:1            | GC:0                  |               |
| chr28 | 10166524 2               | 40 | T:0.025        | C:0.975               |               |
| chr28 | 10166526 2               | 40 | T:1            | C:0                   |               |
| chr28 | 10166527 2               | 40 | CCA:0.025      | C:0.975               |               |
| chr28 | 10166529 2               | 40 | A:1            | G:0                   |               |
| chr28 | 10166595 2               | 38 | GAGAGAC:1      | G:0                   |               |
| chr28 | 10166651 2               | 38 | A:0.947368     | G:0.0526316           |               |
| chr28 | 10166815 2               | 40 | C:0.625        | A:0.375               |               |
| chr28 | 10167035 2               | 38 | T:0.605263     | TA:0.394737           |               |
| chr28 | 10167173 2               | 40 | AT:0.65        | A:0.35                |               |

|                                             |          |   |    |              |             |               |
|---------------------------------------------|----------|---|----|--------------|-------------|---------------|
| chr28                                       | 10167306 | 2 | 40 | T:1          | C:0         |               |
| chr28                                       | 10167353 | 2 | 38 | C:0.736842   |             | T:0.263158    |
| chr28                                       | 10167432 | 2 | 40 | C:0.625      | T:0.375     |               |
| chr28                                       | 10167461 | 2 | 40 | TA:0.7       | T:0.3       |               |
| chr28                                       | 10167532 | 2 | 40 | G:0.95       | A:0.05      |               |
| chr28                                       | 10167797 | 2 | 36 | C:0.944444   |             | T:0.0555556   |
| chr28                                       | 10167871 | 2 | 36 | G:0.0555556  |             | A:0.944444    |
| chr28                                       | 10167923 | 2 | 38 | A:0.947368   |             | C:0.0526316   |
| chr28                                       | 10167993 | 2 | 40 | A:0.95       | G:0.05      |               |
| chr28                                       | 10168029 | 2 | 38 | G:0.0526316  |             | GT:0.947368   |
| chr28                                       | 10168285 | 2 | 40 | T:0.05       | C:0.95      |               |
| chr28                                       | 10168409 | 2 | 34 | TTG:0.794118 |             | T:0.205882    |
| chr28                                       | 10168410 | 2 | 34 | TG:0.5       | T:0.5       |               |
| chr28                                       | 10168483 | 2 | 40 | A:0.05       | G:0.95      |               |
| chr28                                       | 10168500 | 2 | 40 | TA:0.05      | T:0.95      |               |
| chr28                                       | 10168720 | 2 | 38 | A:0.0526316  |             | G:0.947368    |
| chr28                                       | 10169095 | 2 | 36 | A:0.694444   |             | ATT:0.305556  |
| chr28                                       | 10169138 | 2 | 40 | C:0.925      | A:0.075     |               |
| chr28                                       | 10169343 | 2 | 32 | AT:0.65625   |             | A:0.34375     |
| chr28                                       | 10169635 | 2 | 40 | T:1          | A:0         |               |
| chr28                                       | 10169645 | 2 | 40 | T:0.65       | C:0.35      |               |
| chr28                                       | 10169770 | 2 | 40 | A:0.525      | G:0.475     |               |
| chr28                                       | 10169804 | 3 | 36 | CTT:0.527778 |             | C:0.0833333   |
| CT:0.388889                                 |          |   |    |              |             |               |
| chr28                                       | 10170040 | 2 | 34 | T:0.941176   |             | C:0.0588235   |
| chr28                                       | 10170089 | 2 | 40 | G:1          | GT:0        |               |
| chr28                                       | 10170108 | 2 | 38 | C:0.947368   |             | T:0.0526316   |
| chr28                                       | 10170182 | 5 | 40 | T:0.65       | TTTTA:0.125 | TTATTTA:      |
| 0.025 TTATTTATTTA:0.05 TTATTTATTTATTTA:0.15 |          |   |    |              |             |               |
| chr28                                       | 10170238 | 2 | 38 | A:0.605263   |             | G:0.394737    |
| chr28                                       | 10170244 | 2 | 38 | G:0.605263   |             | T:0.394737    |
| chr28                                       | 10170287 | 2 | 40 | G:0.925      | A:0.075     |               |
| chr28                                       | 10170290 | 2 | 40 | G:0.925      | A:0.075     |               |
| chr28                                       | 10170527 | 2 | 38 | T:0.947368   |             | C:0.0526316   |
| chr28                                       | 10170663 | 2 | 40 | C:0.425      | T:0.575     |               |
| chr28                                       | 10170835 | 2 | 38 | T:0.0526316  |             | A:0.947368    |
| chr28                                       | 10170916 | 2 | 40 | TA:0.375     | T:0.625     |               |
| chr28                                       | 10171137 | 2 | 36 | G:0.0833333  |             | A:0.916667    |
| chr28                                       | 10171237 | 2 | 40 | C:0.7        | T:0.3       |               |
| chr28                                       | 10171367 | 2 | 40 | G:0.325      | GA:0.675    |               |
| chr28                                       | 10171752 | 2 | 40 | T:0.05       | C:0.95      |               |
| chr28                                       | 10171820 | 2 | 36 | T:0.138889   |             | TAAA:0.861111 |
| chr28                                       | 10171859 | 2 | 38 | G:0.736842   |             | A:0.263158    |
| chr28                                       | 10171865 | 2 | 38 | G:0.736842   |             | A:0.263158    |
| chr28                                       | 10171943 | 2 | 40 | G:0.725      | C:0.275     |               |
| chr28                                       | 10172177 | 2 | 38 | C:0.631579   |             | A:0.368421    |
| chr28                                       | 10172284 | 2 | 38 | CT:1         | C:0         |               |
| chr28                                       | 10172425 | 2 | 36 | A:0.666667   |             | C:0.333333    |
| chr28                                       | 10172799 | 2 | 38 | C:0.710526   |             | T:0.289474    |
| chr28                                       | 10173033 | 2 | 40 | A:0.7        | G:0.3       |               |
| chr28                                       | 10173460 | 2 | 36 | G:0.638889   |             | C:0.361111    |
| chr28                                       | 10174465 | 2 | 38 | C:0.0526316  |             | T:0.947368    |
| chr28                                       | 10174656 | 2 | 40 | C:0.675      | T:0.325     |               |
| chr28                                       | 10175018 | 2 | 34 | TA:0.676471  |             | T:0.323529    |

|                                     |            |    |                   |                |                |
|-------------------------------------|------------|----|-------------------|----------------|----------------|
| chr28                               | 10175020 2 | 36 | A:1               | T:0            |                |
| chr28                               | 10175416 2 | 36 | G:0               | C:1            |                |
| chr28                               | 10175462 2 | 34 | C:0.764706        |                | T:0.235294     |
| chr28                               | 10175676 2 | 40 | GCAA:0.75         |                | G:0.25         |
| chr28                               | 10175995 2 | 40 | A:0.625           | G:0.375        |                |
| chr28                               | 10176036 2 | 40 | G:0.625           | A:0.375        |                |
| chr28                               | 10176088 2 | 32 | A:0.78125         |                | T:0.21875      |
| chr28                               | 10176155 2 | 40 | T:0.7             |                |                |
| TAAATATTTTTGTTGAAAAAAAAAAGAAAAA:0.3 |            |    |                   |                |                |
| chr28                               | 10176451 2 | 38 | C:0.657895        |                | T:0.342105     |
| chr28                               | 10176452 2 | 38 | G:0.947368        |                | A:0.0526316    |
| chr28                               | 10176636 2 | 36 | G:0.75            | A:0.25         |                |
| chr28                               | 10177037 2 | 40 | C:0               | CA:1           |                |
| chr28                               | 10177053 2 | 40 | C:0               | CA:1           |                |
| chr28                               | 10177172 2 | 36 | G:0.638889        |                | A:0.361111     |
| chr28                               | 10177588 2 | 40 | T:0.675           | A:0.325        |                |
| chr28                               | 10177752 2 | 40 | C:0.675           | A:0.325        |                |
| chr28                               | 10177792 2 | 38 | T:0.631579        |                | C:0.368421     |
| chr28                               | 10177951 2 | 40 | G:0.625           | A:0.375        |                |
| chr28                               | 10177995 2 | 40 | C:0.675           | T:0.325        |                |
| chr28                               | 10178073 2 | 38 | G:0.421053        |                | A:0.578947     |
| chr28                               | 10178127 2 | 36 | T:0.75            | C:0.25         |                |
| chr28                               | 10178215 2 | 34 | T:0.764706        |                | TA:0.235294    |
| chr28                               | 10178216 3 | 34 | T:0.735294        |                | TA:0.0882353   |
| TATA:0.176471                       |            |    |                   |                |                |
| chr28                               | 10178259 2 | 38 | G:0.736842        |                | A:0.263158     |
| chr28                               | 10178587 2 | 40 | CTGGGAGATGCTT:0.7 |                | C:0.3          |
| chr28                               | 10178669 2 | 36 | G:0.75            | A:0.25         |                |
| chr28                               | 10178780 2 | 38 | CA:0.763158       |                | C:0.236842     |
| chr28                               | 10178917 2 | 40 | C:0.725           | T:0.275        |                |
| chr28                               | 10178994 2 | 40 | T:0.75            | G:0.25         |                |
| chr28                               | 10179163 2 | 36 | C:1               | T:0            |                |
| chr28                               | 10179338 2 | 40 | T:0.65            | C:0.35         |                |
| chr28                               | 10179482 2 | 40 | A:0.925           | T:0.075        |                |
| chr28                               | 10179722 2 | 32 | G:0.6875          | GTT:0.3125     |                |
| chr28                               | 10179732 2 | 40 | T:0.95            | TG:0.05        |                |
| chr28                               | 10179736 2 | 40 | T:0.95            | TGTTTTTTT:0.05 |                |
| chr28                               | 10179777 2 | 36 | G:0.972222        |                | A:0.0277778    |
| chr28                               | 10179926 2 | 38 | A:0.894737        |                | T:0.105263     |
| chr28                               | 10180117 2 | 38 | C:0.973684        |                | T:0.0263158    |
| chr28                               | 10180121 2 | 38 | T:0.973684        |                | C:0.0263158    |
| chr28                               | 10180448 2 | 38 | A:0.947368        |                | AGAGAGAGAGAGC: |
| 0.0526316                           |            |    |                   |                |                |
| chr28                               | 10180452 2 | 36 | C:0.388889        |                | T:0.611111     |
| chr28                               | 10180559 2 | 40 | A:0.4             | G:0.6          |                |
| chr28                               | 10180810 2 | 36 | T:0.944444        |                | C:0.0555556    |
| chr28                               | 10180918 2 | 32 | TA:0.875          | T:0.125        |                |
| chr28                               | 10180948 2 | 38 | T:0.973684        |                | A:0.0263158    |
| chr28                               | 10181070 2 | 40 | A:0.9             | AT:0.1         |                |
| chr28                               | 10181208 2 | 40 | G:0.375           | A:0.625        |                |
| chr28                               | 10181272 2 | 38 | A:1               | C:0            |                |
| chr28                               | 10181355 2 | 40 | C:0.975           | T:0.025        |                |
| chr28                               | 10181433 2 | 38 | T:1               | C:0            |                |
| chr28                               | 10181455 2 | 38 | A:1               | ATGCTGC:0      |                |

|       |                                                            |    |                              |     |
|-------|------------------------------------------------------------|----|------------------------------|-----|
| chr28 | 10181479 2                                                 | 38 | CTTCTGTTT:0.973684           | C:  |
|       | 0.0263158                                                  |    |                              |     |
| chr28 | 10181484 2                                                 | 40 | G:0.8 GT:0.2                 |     |
| chr28 | 10181492 2                                                 | 36 | TTG:1 T:0                    |     |
| chr28 | 10181494 2                                                 | 36 | G:0.527778 T:0.472222        |     |
| chr28 | 10181512 4                                                 | 36 | GTTT:0.5 G:0.0277778 GTTTT:0 |     |
|       | TTTT:0.472222                                              |    |                              |     |
| chr28 | 10182245 2                                                 | 36 | T:0.972222 C:0.0277778       |     |
| chr28 | 10182413 2                                                 | 40 | G:0.9 T:0.1                  |     |
| chr28 | 10182486 2                                                 | 36 | T:0.944444 C:0.0555556       |     |
| chr28 | 10182646 2                                                 | 38 | G:0.868421 A:0.131579        |     |
| chr28 | 10182848 4                                                 | 36 | CT:0.0833333 C:0.138889      |     |
|       | CTT:0.444444 CTTT:0.333333                                 |    |                              |     |
| chr28 | 10183221 2                                                 | 40 | G:0.85 A:0.15                |     |
| chr28 | 10183345 2                                                 | 36 | TAGTC:0.916667 T:0.0833333   |     |
| chr28 | 10183420 2                                                 | 36 | T:0.861111 C:0.138889        |     |
| chr28 | 10183703 2                                                 | 40 | G:0.9 GTTTTTTTTTT:0.1        |     |
| chr28 | 10184034 2                                                 | 32 | T:0.78125 TAA:0.21875        |     |
| chr28 | 10184066 2                                                 | 38 | C:0.815789 CT:0.184211       |     |
| chr28 | 10184150 2                                                 | 38 | A:0.789474 T:0.210526        |     |
| chr28 | 10184152 2                                                 | 36 | ATTTATTT:0.5 A:0.5           |     |
| chr28 | 10184489 2                                                 | 38 | A:0.289474 G:0.710526        |     |
| chr28 | 10184650 2                                                 | 40 |                              |     |
|       | CCAAACTTTCTTTTTCTTTTTTTTTTTTTTTTTTTTTTTTTTTTTTTTTTTTTTTT:0 |    |                              | C:1 |
| chr28 | 10184933 2                                                 | 36 | T:0.972222 C:0.0277778       |     |
| chr28 | 10185046 2                                                 | 38 | TA:0.921053 T:0.0789474      |     |
| chr28 | 10185574 2                                                 | 40 | C:0.95 T:0.05                |     |
| chr28 | 10185602 2                                                 | 40 | T:0.925 A:0.075              |     |
| chr28 | 10185825 2                                                 | 40 | G:0.975 A:0.025              |     |
| chr28 | 10186039 2                                                 | 40 | A:0.9 AT:0.1                 |     |
| chr28 | 10186510 2                                                 | 38 | G:0.552632 A:0.447368        |     |
| chr28 | 10187094 2                                                 | 36 | TA:0.333333 T:0.666667       |     |
| chr28 | 10187445 2                                                 | 40 | AAAC:0.9 A:0.1               |     |
| chr28 | 10187515 2                                                 | 40 | G:0.65 A:0.35                |     |
| chr28 | 10187527 2                                                 | 40 | G:0.375 A:0.625              |     |
| chr28 | 10187572 2                                                 | 40 | C:0.9 A:0.1                  |     |
| chr28 | 10187573 2                                                 | 40 | G:0.35 A:0.65                |     |
| chr28 | 10187947 2                                                 | 40 | G:0.85                       |     |
|       | GAAACATGTCCACACAAAATGTGTTTAC:0.15                          |    |                              |     |
| chr28 | 10188244 2                                                 | 38 | TC:0.947368 T:0.0526316      |     |
| chr28 | 10188277 2                                                 | 30 | C:0.933333 G:0.0666667       |     |
| chr28 | 10188361 2                                                 | 38 | T:1 TA:0                     |     |
| chr28 | 10188362 2                                                 | 38 | T:0.526316 A:0.473684        |     |
| chr28 | 10188490 2                                                 | 38 | C:0.657895 T:0.342105        |     |
| chr28 | 10189517 2                                                 | 36 | TC:0.416667 T:0.583333       |     |
| chr28 | 10189654 2                                                 | 38 | G:0.342105 C:0.657895        |     |
| chr28 | 10189689 2                                                 | 38 | C:0.342105 T:0.657895        |     |
| chr28 | 10189692 2                                                 | 38 | T:0.710526 C:0.289474        |     |
| chr28 | 10189913 2                                                 | 40 | A:0.5 G:0.5                  |     |
| chr28 | 10190601 2                                                 | 40 | G:0.9 A:0.1                  |     |
| chr28 | 10190834 2                                                 | 40 | T:0.1 A:0.9                  |     |
| chr28 | 10191435 2                                                 | 40 | C:0.55 G:0.45                |     |
| chr28 | 10191496 2                                                 | 38 | A:0.526316 G:0.473684        |     |
| chr28 | 10191911 2                                                 | 36 | TA:0.555556 T:0.444444       |     |

|       |          |   |    |                  |                          |
|-------|----------|---|----|------------------|--------------------------|
| chr28 | 10191933 | 2 | 36 | G:0.555556       | A:0.444444               |
| chr28 | 10192231 | 2 | 36 | C:1              | T:0                      |
| chr28 | 10192255 | 2 | 36 | C:0.638889       | T:0.361111               |
| chr28 | 10192561 | 2 | 32 | A:0.9375         | T:0.0625                 |
| chr28 | 10192640 | 2 | 36 | T:0.388889       | A:0.611111               |
| chr28 | 10192664 | 2 | 34 | C:0.235294       | G:0.764706               |
| chr28 | 10192898 | 2 | 20 | G:0.35           | C:0.65                   |
| chr28 | 10194221 | 2 | 32 | T:0.46875        | C:0.53125                |
| chr28 | 10194540 | 3 | 36 | G:1              | GTGC:0                   |
| chr28 | 10194740 | 2 | 40 | A:0.6            | G:0.4                    |
| chr28 | 10195054 | 2 | 36 | CTT:0.888889     | C:0.111111               |
| chr28 | 10195593 | 2 | 36 | GTATT:0.583333   | G:0.416667               |
| chr28 | 10195621 | 3 | 40 | GT:0.4           | G:0.1                    |
| chr28 | 10196362 | 2 | 38 | GTTTTT:0.5       |                          |
| chr28 | 10196855 | 2 | 36 | A:0.552632       | G:0.447368               |
| chr28 | 10196857 | 4 | 40 | CTT:1            | C:0                      |
| chr28 | 10196857 | 4 | 40 | TTTTTC:0.85      | T:0.025                  |
|       |          |   |    | TTTTCTTTTC:0.125 | TTTTCTTTCTTTCTTTTC:0     |
| chr28 | 10196894 | 2 | 40 | T:0.925          | TTTTCTTTCTTTCTTTTC:0.075 |
| chr28 | 10196944 | 2 | 40 | C:0.975          | CCTTT:0.025              |
| chr28 | 10196965 | 2 | 40 | CTTTCTTT:1       | C:0                      |
| chr28 | 10196972 | 2 | 38 | T:0.842105       | TC:0.157895              |
| chr28 | 10196985 | 2 | 38 | C:0.710526       | T:0.289474               |
| chr28 | 10198571 | 2 | 40 | A:0.3            | AAATT:0.7                |
| chr28 | 10198572 | 2 | 40 | A:0.925          | AATT:0.075               |
| chr28 | 10198658 | 4 | 40 | C:0.375          | CATAA:0.425              |
|       |          |   |    | CATAAATAA:0.125  | CATAAATAAATAA:0.075      |
| chr28 | 10199197 | 2 | 36 | C:0.833333       | T:0.166667               |
| chr28 | 10199651 | 2 | 32 | C:0.1875         | CT:0.8125                |
| chr28 | 10199887 | 2 | 38 | TTTTA:0.710526   | T:0.289474               |
| chr28 | 10201240 | 2 | 36 | CATTT:0.0555556  | C:0.944444               |
| chr28 | 10201918 | 2 | 38 | C:0.894737       | T:0.105263               |
| chr28 | 10202452 | 2 | 38 | A:0              | G:1                      |
| chr28 | 10204117 | 2 | 38 | T:0              | A:1                      |
| chr28 | 10204662 | 2 | 40 | T:0.475          | A:0.525                  |
| chr28 | 10204694 | 2 | 34 | C:1              | CAG:0                    |
| chr28 | 10204858 | 2 | 40 | T:0.35           | C:0.65                   |
| chr28 | 10204975 | 2 | 40 | A:0.475          | T:0.525                  |
| chr28 | 10206008 | 2 | 40 | C:1              | T:0                      |
| chr28 | 10206285 | 3 | 40 | TA:0.45          | T:0.075                  |
| chr28 | 10206466 | 2 | 32 | TAA:0.475        |                          |
| chr28 | 10206466 | 2 | 32 | C:0              | T:1                      |
| chr28 | 10206866 | 2 | 30 | C:0.566667       | CA:0.433333              |
| chr28 | 10206960 | 2 | 38 | A:0.447368       | AT:0.552632              |
| chr28 | 10209139 | 2 | 30 | C:0.4            | CT:0.6                   |
| chr28 | 10209599 | 2 | 30 | C:1              | T:0                      |
| chr28 | 10209824 | 2 | 40 | T:0.75           | C:0.25                   |
| chr28 | 10210027 | 2 | 40 | T:0.525          | TA:0.475                 |
| chr28 | 10210545 | 2 | 38 | G:0.394737       | C:0.605263               |
| chr28 | 10211524 | 2 | 38 | CAG:1            | C:0                      |
| chr28 | 10211592 | 2 | 38 | C:1              | T:0                      |
| chr28 | 10211945 | 2 | 40 | G:0.5            | A:0.5                    |
| chr28 | 10213084 | 2 | 40 | A:0.5            | G:0.5                    |
| chr28 | 10214082 | 2 | 38 | C:0.973684       | T:0.0263158              |
| chr28 | 10215146 | 2 | 40 | TAA:1            | T:0                      |
| chr28 | 10215148 | 2 | 40 | A:1              | ATTTTTTTTTTTTTT:0        |

|       |          |   |    |             |             |
|-------|----------|---|----|-------------|-------------|
| chr28 | 10215235 | 2 | 34 | A:0.352941  | G:0.647059  |
| chr28 | 10215560 | 2 | 28 | A:0.464286  | C:0.535714  |
| chr28 | 10215797 | 2 | 34 | CT:0.647059 | C:0.352941  |
| chr28 | 10216136 | 2 | 36 | T:0.527778  | G:0.472222  |
| chr28 | 10216903 | 2 | 40 | TTTTA:0.975 | T:0.025     |
| chr28 | 10217303 | 2 | 38 | C:0.552632  | G:0.447368  |
| chr28 | 10217443 | 2 | 40 | T:0.95      | G:0.05      |
| chr28 | 10217656 | 2 | 36 | C:0         | T:1         |
| chr28 | 10217667 | 2 | 36 | A:0         | T:1         |
| chr28 | 10217670 | 2 | 36 | A:0         | T:1         |
| chr28 | 10217684 | 2 | 36 | A:0         | G:1         |
| chr28 | 10217713 | 2 | 40 | G:0         | C:1         |
| chr28 | 10217717 | 2 | 40 | G:0         | C:1         |
| chr28 | 10217725 | 2 | 40 | G:0         | A:1         |
| chr28 | 10217727 | 2 | 40 | T:0         | C:1         |
| chr28 | 10217732 | 2 | 40 | TG:0        | T:1         |
| chr28 | 10217750 | 2 | 40 | G:0         | T:1         |
| chr28 | 10217757 | 2 | 40 | A:0         | G:1         |
| chr28 | 10217769 | 2 | 40 | C:0         | CA:1        |
| chr28 | 10217772 | 2 | 40 | G:0         | T:1         |
| chr28 | 10217773 | 2 | 40 | AT:0        | A:1         |
| chr28 | 10217776 | 2 | 40 | T:0         | C:1         |
| chr28 | 10217785 | 2 | 40 | G:0         | GC:1        |
| chr28 | 10217791 | 2 | 40 | TCTAG:0     | T:1         |
| chr28 | 10217796 | 2 | 40 | A:0         | ATC:1       |
| chr28 | 10217805 | 2 | 40 | A:0         | T:1         |
| chr28 | 10217814 | 2 | 40 | A:0         | C:1         |
| chr28 | 10217815 | 2 | 40 | C:0         | A:1         |
| chr28 | 10217816 | 2 | 40 | T:0         | G:1         |
| chr28 | 10217887 | 2 | 38 | G:0         | A:1         |
| chr28 | 10219877 | 2 | 40 | A:0.575     | G:0.425     |
| chr28 | 10220208 | 2 | 36 | G:0         | GA:1        |
| chr28 | 10220401 | 2 | 40 | T:0.425     | TC:0.575    |
| chr28 | 10220414 | 2 | 40 | A:0.95      | T:0.05      |
| chr28 | 10220416 | 2 | 40 | A:0.25      | T:0.75      |
| chr28 | 10220438 | 2 | 38 | G:0.552632  | GT:0.447368 |
| chr28 | 10220523 | 2 | 36 | G:0.472222  | A:0.527778  |
| chr28 | 10220530 | 2 | 36 | G:1         | A:0         |
| chr28 | 10220819 | 2 | 40 | A:0.8       | T:0.2       |
| chr28 | 10220844 | 2 | 40 | T:0.5       | C:0.5       |
| chr28 | 10221024 | 2 | 40 | A:0         | G:1         |
| chr28 | 10221026 | 2 | 40 | A:0         | G:1         |
| chr28 | 10221031 | 2 | 40 | AG:0        | A:1         |
| chr28 | 10221051 | 2 | 40 | G:0         | A:1         |
| chr28 | 10221065 | 2 | 40 | A:0         | ATATT:1     |
| chr28 | 10221066 | 2 | 40 | AAGGG:0     | A:1         |
| chr28 | 10221075 | 2 | 40 | T:0         | A:1         |
| chr28 | 10221092 | 2 | 40 | GAA:0       | G:1         |
| chr28 | 10221094 | 2 | 40 | A:0         | ATTT:1      |
| chr28 | 10221096 | 2 | 40 | C:0         | CT:1        |
| chr28 | 10221102 | 2 | 40 | T:0         | TA:1        |
| chr28 | 10221130 | 2 | 40 | G:0         | T:1         |
| chr28 | 10221169 | 2 | 38 | A:0         | T:1         |
| chr28 | 10221188 | 2 | 38 | G:0         | T:1         |

|                                    |                     |    |                                    |               |
|------------------------------------|---------------------|----|------------------------------------|---------------|
| chr28                              | 10221251 2          | 38 | C:0.815789                         | CCT:0.184211  |
| chr28                              | 10221651 2          | 34 | C:0.970588                         | CT:0.0294118  |
| chr28                              | 10221784 2          | 38 | TTTCTTTC:0.605263                  | T:            |
| 0.394737                           |                     |    |                                    |               |
| chr28                              | 10221870 2          | 38 | CTCTTTCTTTCTTTCTTTCTTTCTT:0.736842 |               |
|                                    | C:0.263158          |    |                                    |               |
| chr28                              | 10222097 2          | 38 |                                    |               |
| TTCTTTCTTTCTTTCTTTCTTTCTCTCTCTCTC: | 0.342105            |    | T:0.657895                         |               |
| chr28                              | 10225079 2          | 38 | TCCC:0.552632                      | T:0.447368    |
| chr28                              | 10225082 2          | 38 | C:0.473684                         | T:0.526316    |
| chr28                              | 10225086 2          | 36 | A:0.833333                         | ATTC:0.166667 |
| chr28                              | 10225154 2          | 36 | G:1 A:0                            |               |
| chr28                              | 10226261 4          | 36 | CAG:0.166667                       | C:0.166667    |
| CAGAG:0.416667                     | CAGAGAG:0.25        |    |                                    |               |
| chr28                              | 10226865 2          | 40 | A:1 C:0                            |               |
| chr28                              | 10227301 2          | 40 | A:0.525 G:0.475                    |               |
| chr28                              | 10227734 3          | 38 | C:0.263158                         | CT:0.5 CTT:   |
| 0.236842                           |                     |    |                                    |               |
| chr28                              | 10227822 2          | 36 | AT:0.75 A:0.25                     |               |
| chr28                              | 10228493 2          | 38 | TAAA:1 T:0                         |               |
| chr28                              | 10228498 2          | 38 | A:1 T:0                            |               |
| chr28                              | 10228609 2          | 38 | C:0.973684                         | T:0.0263158   |
| chr28                              | 10229110 2          | 38 | GA:0.605263                        | G:0.394737    |
| chr28                              | 10229543 2          | 40 | G:1 GT:0                           |               |
| chr28                              | 10229764 2          | 36 | AT:0.472222                        | A:0.527778    |
| chr28                              | 10229828 2          | 38 | C:0.526316                         | CT:0.473684   |
| chr28                              | 10230082 2          | 38 | C:0.710526                         | A:0.289474    |
| chr28                              | 10231615 2          | 38 | G:1 C:0                            |               |
| chr28                              | 10231666 5          | 40 | TTATCTATCTATCTATC:0.125            | T:0.425       |
| TTATC:0.15                         | TTATCTATCTATC:0.275 |    | TTATCTATCTATCTATCTATC:             |               |
| 0.025                              |                     |    |                                    |               |
| chr28                              | 10232630 2          | 40 | T:0 A:1                            |               |
| chr28                              | 10232644 2          | 40 | ATTT:0 A:1                         |               |
| chr28                              | 10232649 2          | 40 | T:0 TGG:1                          |               |
| chr28                              | 10232651 2          | 40 | A:0 G:1                            |               |
| chr28                              | 10232653 2          | 40 | GC:0 G:1                           |               |
| chr28                              | 10232658 2          | 40 | A:0 G:1                            |               |
| chr28                              | 10232662 2          | 40 | C:0 T:1                            |               |
| chr28                              | 10232681 2          | 40 | C:0 A:1                            |               |
| chr28                              | 10232696 2          | 40 | G:0 T:1                            |               |
| chr28                              | 10232705 2          | 40 | C:0 A:1                            |               |
| chr28                              | 10232731 2          | 36 | A:0 T:1                            |               |
| chr28                              | 10232738 2          | 36 | T:0 A:1                            |               |
| chr28                              | 10232760 2          | 36 | C:0 A:1                            |               |
| chr28                              | 10232886 2          | 38 | GT:0.921053                        | G:0.0789474   |
| chr28                              | 10233249 2          | 38 | T:0.526316                         | A:0.473684    |
| chr28                              | 10233584 2          | 36 | CT:0.222222                        | C:0.777778    |
| chr28                              | 10233628 3          | 38 | A:0.578947                         | AAG:0.421053  |
| AAGAG:0                            |                     |    |                                    |               |
| chr28                              | 10234058 2          | 40 | T:0.575 A:0.425                    |               |
| chr28                              | 10234981 2          | 38 | TA:0.710526                        | T:0.289474    |
| chr28                              | 10236023 2          | 38 | CTGATTGAT:0.894737                 | C:            |
| 0.105263                           |                     |    |                                    |               |
| chr28                              | 10236871 2          | 40 | C:0.525 A:0.475                    |               |

|       |                  |    |              |                  |
|-------|------------------|----|--------------|------------------|
| chr28 | 10237348 3       | 40 | T:0.45       | TTTTTA:0.4       |
|       | TTTTTATTTTA:0.15 |    |              |                  |
| chr28 | 10237407 3       | 40 | CAG:0.875    | C:0.05 CAGAG:    |
|       | 0.075            |    |              |                  |
| chr28 | 10237409 2       | 40 | G:0.525      | C:0.475          |
| chr28 | 10237514 2       | 32 | G:0.46875    | C:0.53125        |
| chr28 | 10237537 2       | 34 | G:0.529412   | A:0.470588       |
| chr28 | 10239051 2       | 36 | AGT:0.972222 | A:0.0277778      |
| chr28 | 10239081 2       | 36 | T:0.583333   | A:0.416667       |
| chr28 | 10239174 2       | 38 | T:0.447368   | A:0.552632       |
| chr28 | 10241743 2       | 38 | C:0.868421   | T:0.131579       |
| chr28 | 10241847 2       | 40 | A:0.575      | T:0.425          |
| chr28 | 10241959 2       | 40 | C:0.6        | T:0.4            |
| chr28 | 10242101 2       | 40 | A:0.5        | C:0.5            |
| chr28 | 10242211 2       | 40 | AT:0.5       | A:0.5            |
| chr28 | 10243424 2       | 38 | T:1          | C:0              |
| chr28 | 10243517 2       | 40 | A:0.5        | AAAAAC:0.5       |
| chr28 | 10243960 2       | 40 | C:0.525      | CCT:0.475        |
| chr28 | 10244078 2       | 40 | T:0.475      | G:0.525          |
| chr28 | 10244190 2       | 40 | C:0.45       | A:0.55           |
| chr28 | 10244813 2       | 38 | A:0.552632   | G:0.447368       |
| chr28 | 10245114 3       | 40 | G:0.375      | GT:0.525 GTT:0.1 |
| chr28 | 10245632 2       | 40 | C:1          | T:0              |
| chr28 | 10246538 2       | 38 | C:0.973684   | CT:0.0263158     |
| chr28 | 10246807 3       | 34 | CTT:0.676471 | C:0.294118       |
|       | CTTT:0.0294118   |    |              |                  |
| chr28 | 10247331 2       | 38 | TA:0.421053  | T:0.578947       |
| chr28 | 10247387 2       | 34 | TA:0.882353  | T:0.117647       |
| chr28 | 10247592 2       | 28 | G:0.607143   | GT:0.392857      |
| chr28 | 10247617 2       | 36 | C:0.444444   | CT:0.555556      |
| chr28 | 10247886 2       | 40 | T:0.85       | C:0.15           |
| chr28 | 10248273 2       | 38 | AC:0.736842  | A:0.263158       |
| chr28 | 10248337 2       | 38 | T:1          | TGAGA:0          |
| chr28 | 10250140 2       | 38 | A:0.447368   | G:0.552632       |
| chr28 | 10250481 2       | 36 | CT:0.75      | C:0.25           |
| chr28 | 10250920 2       | 38 | T:0.5        | C:0.5            |
| chr28 | 10251016 2       | 40 | T:1          | G:0              |
| chr28 | 10252020 2       | 38 | G:0.631579   | A:0.368421       |
| chr28 | 10254917 2       | 34 | TCA:0.941176 | T:0.0588235      |
| chr28 | 10254924 2       | 34 | C:0.470588   | G:0.529412       |
| chr28 | 10255526 2       | 38 | G:0          | C:1              |
| chr28 | 10255597 2       | 40 | C:0          | A:1              |
| chr28 | 10255637 2       | 40 | G:0          | T:1              |
| chr28 | 10255654 2       | 40 | T:0          | A:1              |
| chr28 | 10255824 2       | 36 | CCT:0.5      | C:0.5            |
| chr28 | 10256382 2       | 36 | C:0.472222   | T:0.527778       |
| chr28 | 10256928 2       | 38 | C:1          | CA:0             |
| chr28 | 10257348 2       | 38 | G:0          | A:1              |
| chr28 | 10257358 2       | 38 | G:0          | A:1              |
| chr28 | 10258105 2       | 38 | CT:0.421053  | C:0.578947       |
| chr28 | 10258193 2       | 40 | A:0.025      | G:0.975          |
| chr28 | 10259148 2       | 30 | C:1          | CAG:0            |
| chr28 | 10259732 2       | 40 | T:1          | TA:0             |
| chr28 | 10259775 3       | 40 | ATTTTAT:0.4  | A:0.55           |





|                 |                     |   |    |                  |              |          |  |
|-----------------|---------------------|---|----|------------------|--------------|----------|--|
| chr28           | 10278194            | 2 | 38 | T:0              | A:1          |          |  |
| chr28           | 10278201            | 2 | 38 | C:0              | G:1          |          |  |
| chr28           | 10278206            | 2 | 38 | G:0              | T:1          |          |  |
| chr28           | 10278208            | 2 | 38 | C:0              | T:1          |          |  |
| chr28           | 10278214            | 2 | 38 | TA:0             | T:1          |          |  |
| chr28           | 10278235            | 2 | 38 | C:0              | A:1          |          |  |
| chr28           | 10278245            | 2 | 38 | T:0              | A:1          |          |  |
| chr28           | 10278248            | 2 | 38 | C:0              | T:1          |          |  |
| chr28           | 10278252            | 2 | 38 | T:0              | A:1          |          |  |
| chr28           | 10278278            | 2 | 38 | G:0              | T:1          |          |  |
| chr28           | 10278281            | 2 | 38 | A:0              | T:1          |          |  |
| chr28           | 10278287            | 2 | 38 | G:0              | T:1          |          |  |
| chr28           | 10278347            | 2 | 38 | G:0              | T:1          |          |  |
| chr28           | 10278366            | 2 | 38 | T:0              | TG:1         |          |  |
| chr28           | 10278374            | 2 | 38 | GA:0             | G:1          |          |  |
| chr28           | 10278377            | 2 | 38 | A:0              | T:1          |          |  |
| chr28           | 10278380            | 2 | 38 | C:0              | T:1          |          |  |
| chr28           | 10278383            | 2 | 38 | C:0              | T:1          |          |  |
| chr28           | 10278384            | 2 | 38 | G:0              | GT:1         |          |  |
| chr28           | 10278389            | 2 | 38 | A:0              | T:1          |          |  |
| chr28           | 10278392            | 2 | 38 | GA:0             | G:1          |          |  |
| chr28           | 10278414            | 2 | 36 | G:0              | T:1          |          |  |
| chr28           | 10278426            | 2 | 38 | A:0              | AG:1         |          |  |
| chr28           | 10278427            | 2 | 38 | A:0              | AT:1         |          |  |
| chr28           | 10278429            | 2 | 38 | C:0              | T:1          |          |  |
| chr28           | 10278431            | 2 | 38 | T:0              | TA:1         |          |  |
| chr28           | 10278436            | 2 | 38 | C:0              | CA:1         |          |  |
| chr28           | 10278862            | 5 | 40 | T:0.525          | TGAGA:0.325  | TGAGAGA: |  |
| 0.075           | TGAGAGAGA:0.075     |   |    | TGAGAGAGAGA:0    |              |          |  |
| chr28           | 10280142            | 2 | 38 | C:0.552632       | T:0.447368   |          |  |
| chr28           | 10282101            | 2 | 40 | A:0.5            | C:0.5        |          |  |
| chr28           | 10283438            | 4 | 40 | TATTC:0.225      | T:0.275      |          |  |
| TATTCATTC:0.075 | TATTCATTCATTC:0.425 |   |    |                  |              |          |  |
| chr28           | 10283617            | 2 | 38 | C:1              | T:0          |          |  |
| chr28           | 10283905            | 4 | 38 | TCACACA:0.421053 | T:0.5        | TCA:     |  |
| 0.0263158       | TCACA:0.0526316     |   |    |                  |              |          |  |
| chr28           | 10284389            | 2 | 38 | CT:1             | C:0          |          |  |
| chr28           | 10284402            | 2 | 38 | T:0.552632       | A:0.447368   |          |  |
| chr28           | 10284429            | 2 | 34 | C:0.617647       | CAG:0.382353 |          |  |
| chr28           | 10284649            | 2 | 38 | T:0.710526       | G:0.289474   |          |  |
| chr28           | 10286031            | 2 | 38 | CT:0.578947      | C:0.421053   |          |  |
| chr28           | 10286311            | 2 | 36 | T:0.972222       | TA:0.0277778 |          |  |
| chr28           | 10286602            | 2 | 24 | TG:0.833333      | T:0.166667   |          |  |
| chr28           | 10286866            | 2 | 32 | A:0.625          | AT:0.375     |          |  |
| chr28           | 10288118            | 2 | 40 | C:0.5            | A:0.5        |          |  |
| chr28           | 10289368            | 2 | 40 | AAATG:0.5        | A:0.5        |          |  |
| chr28           | 10290222            | 2 | 38 | C:0.473684       | T:0.526316   |          |  |
| chr28           | 10291300            | 2 | 32 | T:1              | A:0          |          |  |
| chr28           | 10291599            | 2 | 38 | T:0.5            | G:0.5        |          |  |
| chr28           | 10292188            | 2 | 36 | G:0.805556       | GC:0.194444  |          |  |
| chr28           | 10292196            | 2 | 36 | C:0.861111       | A:0.138889   |          |  |
| chr28           | 10293113            | 2 | 40 | A:0.7            | AC:0.3       |          |  |
| chr28           | 10293942            | 2 | 40 | A:0.9            | G:0.1        |          |  |
| chr28           | 10293975            | 2 | 38 | CTG:0.526316     | C:0.473684   |          |  |

|       |            |    |                |                   |              |
|-------|------------|----|----------------|-------------------|--------------|
| chr28 | 10295027 2 | 40 | G:1            | T:0               |              |
| chr28 | 10296691 2 | 38 | C:0.605263     | A:0.394737        |              |
| chr28 | 10297215 2 | 30 | A:0.766667     | AT:0.233333       |              |
| chr28 | 10297228 2 | 26 | A:0.461538     | AT:0.538462       |              |
| chr28 | 10297234 2 | 32 | T:0.78125      | TA:0.21875        |              |
| chr28 | 10297242 2 | 28 | A:0.642857     | T:0.357143        |              |
| chr28 | 10297584 2 | 40 | T:1            | G:0               |              |
| chr28 | 10298321 2 | 38 | T:0.5          | G:0.5             |              |
| chr28 | 10299018 2 | 38 | A:0.421053     | C:0.578947        |              |
| chr28 | 10299242 2 | 40 | G:0.525        | GTGATGA:0.475     |              |
| chr28 | 10299389 2 | 38 | AG:1           | A:0               |              |
| chr28 | 10299571 2 | 40 | CT:0.925       | C:0.075           |              |
| chr28 | 10299671 2 | 38 | G:0.421053     | A:0.578947        |              |
| chr28 | 10300921 2 | 40 | T:0.525        | C:0.475           |              |
| chr28 | 10303275 2 | 38 | T:1            | TAATAATTAAATA:0   |              |
| chr28 | 10303278 2 | 34 | TA:0.970588    | T:0.0294118       |              |
| chr28 | 10303281 2 | 34 | A:0.882353     | T:0.117647        |              |
| chr28 | 10303282 2 | 34 | TAAA:0.970588  | T:0.0294118       |              |
| chr28 | 10303322 2 | 38 | T:0.842105     | TAAATAAA:0.157895 |              |
| chr28 | 10305770 2 | 38 | GT:0.421053    | G:0.578947        |              |
| chr28 | 10306110 2 | 38 | G:0.973684     | A:0.0263158       |              |
| chr28 | 10306667 3 | 36 | G:0.5          | GT:0.0833333      | GTT:0.416667 |
| chr28 | 10308168 2 | 40 | CTTTG:0.9      | C:0.1             |              |
| chr28 | 10308216 2 | 38 | TA:0.631579    | T:0.368421        |              |
| chr28 | 10308710 2 | 40 | T:1            | C:0               |              |
| chr28 | 10309124 2 | 40 | T:1            | TCTTCTCCTTCTC:0   |              |
| chr28 | 10309226 2 | 38 | T:1            | A:0               |              |
| chr28 | 10309300 2 | 36 | G:0.416667     | A:0.583333        |              |
| chr28 | 10309586 2 | 38 | T:0.473684     | TTG:0.526316      |              |
| chr28 | 10309762 2 | 40 | C:1            | T:0               |              |
| chr28 | 10314496 2 | 40 | AG:0.425       | A:0.575           |              |
| chr28 | 10318186 2 | 38 | T:0.526316     | G:0.473684        |              |
| chr28 | 10320740 2 | 34 | C:0.764706     | T:0.235294        |              |
| chr28 | 10322045 2 | 38 | T:1            | A:0               |              |
| chr28 | 10322857 2 | 38 | G:0.684211     | A:0.315789        |              |
| chr28 | 10323774 2 | 38 | A:0.894737     | G:0.105263        |              |
| chr28 | 10324368 2 | 38 | TAC:0.710526   | T:0.289474        |              |
| chr28 | 10326115 2 | 40 | A:0.5          | T:0.5             |              |
| chr28 | 10326851 2 | 38 | T:0.710526     | TA:0.289474       |              |
| chr28 | 10327782 2 | 40 | TA:0.55        | T:0.45            |              |
| chr28 | 10328178 2 | 40 | AG:1           | A:0               |              |
| chr28 | 10328491 2 | 32 | C:0.8125       | CCTCT:0.1875      |              |
| chr28 | 10329049 3 | 36 | TA:0.194444    | T:0.361111        |              |
| chr28 | 10330111 2 | 38 | G:1            | A:0               |              |
| chr28 | 10330709 2 | 28 | G:0            | T:1               |              |
| chr28 | 10330904 2 | 38 | TA:0.368421    | T:0.631579        |              |
| chr28 | 10331042 2 | 40 | A:1            | T:0               |              |
| chr28 | 10331876 2 | 40 | G:1            | A:0               |              |
| chr28 | 10333265 2 | 38 | C:0.5          | T:0.5             |              |
| chr28 | 10333520 2 | 38 | G:0.447368     | A:0.552632        |              |
| chr28 | 10335857 2 | 40 | G:1            | A:0               |              |
| chr28 | 10336123 2 | 38 | CTTTG:0.447368 | C:0.552632        |              |

|       |                 |   |    |               |                        |
|-------|-----------------|---|----|---------------|------------------------|
| chr28 | 10336126        | 2 | 38 | T:0.552632    | G:0.447368             |
| chr28 | 10336127        | 2 | 38 | G:0.552632    | T:0.447368             |
| chr28 | 10337878        | 2 | 40 | TTAGCTGCATG:1 | T:0                    |
| chr28 | 10338084        | 2 | 38 | A:0.526316    | AT:0.473684            |
| chr28 | 10338969        | 2 | 40 | A:0.5         | G:0.5                  |
| chr28 | 10342121        | 2 | 40 | C:1           | G:0                    |
| chr28 | 10345207        | 2 | 40 | G:0.575       | T:0.425                |
| chr28 | 10346971        | 2 | 40 | A:0.5         | AT:0.5                 |
| chr28 | 10346982        | 2 | 40 | AT:1          | A:0                    |
| chr28 | 10346991        | 2 | 40 | T:1           | A:0                    |
| chr28 | 10347370        | 2 | 36 | G:1           | T:0                    |
| chr28 | 10347881        | 2 | 38 | T:0.5         | C:0.5                  |
| chr28 | 10348188        | 2 | 36 | G:1           | A:0                    |
| chr28 | 10348754        | 2 | 40 | T:0           | C:1                    |
| chr28 | 10350541        | 2 | 40 | C:0.95        | T:0.05                 |
| chr28 | 10352784        | 2 | 36 | T:0.0277778   | G:0.972222             |
| chr28 | 10353339        | 2 | 20 | C:0.7         | T:0.3                  |
| chr28 | 10353730        | 2 | 38 | C:0.842105    | A:0.157895             |
| chr28 | 10353892        | 2 | 36 | C:1           | T:0                    |
| chr28 | 10354223        | 2 | 36 | T:0.666667    | C:0.333333             |
| chr28 | 10354372        | 2 | 38 | G:0.421053    | GC:0.578947            |
| chr28 | 10354374        | 2 | 38 | G:0.421053    | T:0.578947             |
| chr28 | 10354908        | 2 | 40 | C:1           | T:0                    |
| chr28 | 10355356        | 2 | 36 | C:0.777778    | CA:0.222222            |
| chr28 | 10355921        | 2 | 40 | A:0.425       | G:0.575                |
| chr28 | 10356475        | 2 | 34 | TG:0.705882   | T:0.294118             |
| chr28 | 10357042        | 2 | 40 | T:0.55        | C:0.45                 |
| chr28 | 10358217        | 2 | 38 | TA:0.973684   | T:0.0263158            |
| chr28 | 10358632        | 2 | 38 | C:0.5         | A:0.5                  |
| chr28 | 10358988        | 2 | 38 | G:1           | A:0                    |
| chr28 | 10359688        | 2 | 38 | C:1           | T:0                    |
| chr28 | 10360705        | 2 | 38 | T:0           | A:1                    |
| chr28 | 10360707        | 2 | 38 | A:0           | AT:1                   |
| chr28 | 10360711        | 2 | 38 | G:0           | T:1                    |
| chr28 | 10360718        | 2 | 38 | A:0           | AT:1                   |
| chr28 | 10360739        | 2 | 40 | T:0           | G:1                    |
| chr28 | 10360895        | 2 | 38 | A:0.5         | G:0.5                  |
| chr28 | 10361065        | 2 | 36 | G:0.555556    | A:0.444444             |
| chr28 | 10361098        | 2 | 34 | T:0.558824    | C:0.441176             |
| chr28 | 10362366        | 2 | 38 | C:0.5         | G:0.5                  |
| chr28 | 10363075        | 3 | 36 | ATG:0.805556  | A:0 ATGTG:<br>0.194444 |
| chr28 | 10363085        | 2 | 36 | G:0.944444    | GTA:0.0555556          |
| chr28 | 10363087        | 4 | 38 | G:0.815789    | A:0.105263             |
| GTA:0 | GTATA:0.0789474 |   |    |               |                        |
| chr28 | 10363501        | 2 | 40 | C:1           | T:0                    |
| chr28 | 10363642        | 2 | 38 | G:0.394737    | A:0.605263             |
| chr28 | 10363714        | 2 | 38 | G:0.473684    | C:0.526316             |
| chr28 | 10363864        | 2 | 36 | T:0.5         | C:0.5                  |
| chr28 | 10364030        | 2 | 40 | G:0.45        | C:0.55                 |
| chr28 | 10364043        | 2 | 40 | G:0.525       | A:0.475                |
| chr28 | 10365147        | 2 | 36 | G:0.5         | A:0.5                  |
| chr28 | 10365157        | 2 | 36 | A:0.972222    | C:0.0277778            |
| chr28 | 10365235        | 2 | 40 | G:0.45        | GAACGCTGCAGCCC:0.55    |

|       |          |   |    |                               |                 |
|-------|----------|---|----|-------------------------------|-----------------|
| chr28 | 10365596 | 2 | 36 | G:0.416667                    | A:0.583333      |
| chr28 | 10365841 | 2 | 36 | CGG:0.583333                  | C:0.416667      |
| chr28 | 10365890 | 2 | 36 | T:0.527778                    | C:0.472222      |
| chr28 | 10366396 | 2 | 36 | C:1                           | T:0             |
| chr28 | 10366452 | 2 | 34 | C:1                           | T:0             |
| chr28 | 10366773 | 2 | 34 | G:1                           | A:0             |
| chr28 | 10366873 | 2 | 38 | G:0.5                         | A:0.5           |
| chr28 | 10367446 | 2 | 38 | CCG:0.552632                  | C:0.447368      |
| chr28 | 10367453 | 2 | 38 | C:0.552632                    | CACACA:0.447368 |
| chr28 | 10367644 | 2 | 38 | C:0.394737                    | T:0.605263      |
| chr28 | 10367688 | 2 | 40 | G:0                           | C:1             |
| chr28 | 10367732 | 2 | 38 | G:0.5                         | T:0.5           |
| chr28 | 10368120 | 2 | 38 | T:0.421053                    | C:0.578947      |
| chr28 | 10369407 | 2 | 34 | A:1                           | AGT:0           |
| chr28 | 10370816 | 2 | 38 | G:0                           | A:1             |
| chr28 | 10370817 | 2 | 38 | A:0                           | T:1             |
| chr28 | 10370858 | 2 | 40 | T:0                           | C:1             |
| chr28 | 10370865 | 2 | 40 | C:0                           | G:1             |
| chr28 | 10370866 | 2 | 40 | TCCCC:0                       | T:1             |
| chr28 | 10370872 | 2 | 40 | C:0                           | CTATG:1         |
| chr28 | 10370927 | 2 | 38 | T:0                           | TA:1            |
| chr28 | 10374078 | 2 | 34 | C:0.0882353                   | T:0.911765      |
| chr28 | 10377572 | 2 | 36 | C:1                           | T:0             |
| chr28 | 10378750 | 2 | 34 | A:0.852941                    | G:0.147059      |
| chr28 | 10378769 | 2 | 34 | G:0.823529                    | A:0.176471      |
| chr28 | 10379163 | 2 | 36 | C:0.944444                    | T:0.0555556     |
| chr28 | 10379774 | 2 | 34 | G:0.882353                    | C:0.117647      |
| chr28 | 10379827 | 2 | 34 | T:0.911765                    | C:0.0882353     |
| chr28 | 10379987 | 2 | 34 | A:0.970588                    | G:0.0294118     |
| chr28 | 10380811 | 2 | 34 | C:0.911765                    | A:0.0882353     |
| chr28 | 10381643 | 2 | 38 | A:0.921053                    | G:0.0789474     |
| chr28 | 10381703 | 2 | 40 | C:1                           | T:0             |
| chr28 | 10381792 | 2 | 38 | G:0.921053                    | A:0.0789474     |
| chr28 | 10381872 | 2 | 40 | TCC:0.725                     | T:0.275         |
| chr28 | 10381875 | 2 | 40 | TCTCCTCCTCCTCCTCCCCTCCC:0.725 |                 |
|       | T:0.275  |   |    |                               |                 |
| chr28 | 10382353 | 2 | 38 | C:0.868421                    | G:0.131579      |
| chr28 | 10382580 | 2 | 36 | C:0.416667                    | T:0.583333      |
| chr28 | 10383052 | 2 | 38 | A:0.815789                    | T:0.184211      |
| chr28 | 10383887 | 2 | 40 | A:0.9                         | G:0.1           |
| chr28 | 10384028 | 2 | 38 | A:0.921053                    | G:0.0789474     |
| chr28 | 10384349 | 2 | 32 | C:0.90625                     | T:0.09375       |
| chr28 | 10384687 | 2 | 38 | T:0.921053                    | C:0.0789474     |
| chr28 | 10385385 | 2 | 38 | G:0                           | C:1             |
| chr28 | 10385825 | 2 | 38 | G:0.894737                    | A:0.105263      |
| chr28 | 10385939 | 2 | 38 | A:0.894737                    | G:0.105263      |
| chr28 | 10385971 | 2 | 36 | G:0.861111                    | GA:0.138889     |
| chr28 | 10385974 | 2 | 36 | G:0.861111                    | A:0.138889      |
| chr28 | 10386297 | 2 | 36 | T:0.944444                    | C:0.0555556     |
| chr28 | 10386315 | 2 | 36 | G:0.944444                    | C:0.0555556     |
| chr28 | 10386328 | 2 | 30 | A:1                           | G:0             |
| chr28 | 10386501 | 2 | 36 | G:0.944444                    | GA:0.0555556    |
| chr28 | 10386609 | 2 | 36 | A:0.944444                    | T:0.0555556     |
| chr28 | 10386908 | 2 | 36 | C:0.888889                    | T:0.111111      |

|                |            |    |                 |                   |
|----------------|------------|----|-----------------|-------------------|
| chr28          | 10386918 2 | 36 | T:0.888889      | A:0.111111        |
| chr28          | 10387323 2 | 36 | C:0.861111      | T:0.138889        |
| chr28          | 10387401 2 | 34 | G:1 A:0         |                   |
| chr28          | 10387594 2 | 38 | T:0.894737      | C:0.105263        |
| chr28          | 10387806 2 | 38 | A:0.894737      | G:0.105263        |
| chr28          | 10388313 2 | 40 | T:0.9 C:0.1     |                   |
| chr28          | 10388466 2 | 38 | TG:0.921053     | T:0.0789474       |
| chr28          | 10388628 2 | 40 | T:0.9 TA:0.1    |                   |
| chr28          | 10388841 2 | 38 | A:0.921053      | G:0.0789474       |
| chr28          | 10389161 2 | 26 | C:0.923077      | T:0.0769231       |
| chr28          | 10389928 2 | 38 | A:0.894737      | ATTTCATT:0.105263 |
| chr28          | 10390280 2 | 36 | C:0.916667      | T:0.0833333       |
| chr28          | 10390562 2 | 32 | A:0.96875       | C:0.03125         |
| chr28          | 10390574 2 | 32 | T:0.96875       | C:0.03125         |
| chr28          | 10391260 2 | 32 | CA:0 C:1        |                   |
| chr28          | 10391476 2 | 40 | G:0.9 C:0.1     |                   |
| chr28          | 10391557 2 | 40 | C:0.85 T:0.15   |                   |
| chr28          | 10391721 2 | 38 | G:0.894737      | A:0.105263        |
| chr28          | 10391895 2 | 36 | C:0.888889      | T:0.111111        |
| chr28          | 10392035 2 | 40 | C:0.875 T:0.125 |                   |
| chr28          | 10392085 2 | 36 | G:0.666667      | T:0.333333        |
| chr28          | 10392319 2 | 36 | CG:0 C:1        |                   |
| chr28          | 10392365 2 | 36 | G:0.888889      | A:0.111111        |
| chr28          | 10392446 2 | 34 | T:0.823529      | C:0.176471        |
| chr28          | 10392796 2 | 38 | T:0.921053      | C:0.0789474       |
| chr28          | 10392902 2 | 36 | A:0.972222      | G:0.0277778       |
| chr28          | 10393550 2 | 40 | C:0.925 G:0.075 |                   |
| chr28          | 10393652 2 | 36 | G:1 GC:0        |                   |
| chr28          | 10393861 2 | 38 | C:0.921053      | T:0.0789474       |
| chr28          | 10394024 2 | 38 | T:0.868421      | C:0.131579        |
| chr28          | 10394271 2 | 38 | AT:0.868421     | A:0.131579        |
| chr28          | 10394288 2 | 38 | C:0.868421      | A:0.131579        |
| chr28          | 10394868 2 | 38 | G:0.842105      | A:0.157895        |
| chr28          | 10394921 2 | 38 | G:0.868421      | T:0.131579        |
| chr28          | 10395152 2 | 40 | G:0.9 A:0.1     |                   |
| chr28          | 10395369 2 | 40 | G:0.875 C:0.125 |                   |
| chr28          | 10395401 2 | 38 | T:0.894737      | TA:0.105263       |
| chr28          | 10395424 2 | 38 | C:0.894737      | CA:0.105263       |
| chr28          | 10395599 2 | 38 | G:0.868421      | T:0.131579        |
| chr28          | 10395865 2 | 38 | A:0 T:1         |                   |
| chr28          | 10395870 2 | 38 | C:0.894737      | T:0.105263        |
| chr28          | 10395873 2 | 38 | C:0 A:1         |                   |
| chr28          | 10395874 2 | 38 | A:0 T:1         |                   |
| chr28          | 10395884 2 | 38 | G:0.894737      | A:0.105263        |
| chr28          | 10396284 3 | 36 | A:0.333333      | AG:0.111111       |
| AAGAG:0.555556 |            |    |                 |                   |
| chr28          | 10396416 2 | 30 | G:0.8 C:0.2     |                   |
| chr28          | 10396706 2 | 30 | C:0.333333      | A:0.666667        |
| chr28          | 10396711 2 | 32 | T:0.71875       | A:0.28125         |
| chr28          | 10396728 2 | 30 | A:0.8 T:0.2     |                   |
| chr28          | 10397205 2 | 38 | T:0.894737      | C:0.105263        |
| chr28          | 10397433 2 | 38 | T:0.921053      | C:0.0789474       |
| chr28          | 10397476 2 | 38 | T:1 G:0         |                   |
| chr28          | 10397487 2 | 40 | G:1 A:0         |                   |

|       |          |   |    |                         |                |
|-------|----------|---|----|-------------------------|----------------|
| chr28 | 10397646 | 2 | 34 | GC:0.941176             | G:0.0588235    |
| chr28 | 10397753 | 2 | 40 | A:0.9 C:0.1             |                |
| chr28 | 10398029 | 2 | 38 | C:0.921053              | T:0.0789474    |
| chr28 | 10398460 | 2 | 40 | T:0.85 C:0.15           |                |
| chr28 | 10398873 | 2 | 40 | C:0.9 T:0.1             |                |
| chr28 | 10399254 | 2 | 40 | G:0.9 A:0.1             |                |
| chr28 | 10399272 | 2 | 40 | A:1                     | AGGAGGAGCAGG:0 |
| chr28 | 10399274 | 2 | 40 | CCA:1 C:0               |                |
| chr28 | 10399850 | 2 | 38 | C:1 G:0                 |                |
| chr28 | 10400340 | 2 | 40 | C:0.9 T:0.1             |                |
| chr28 | 10400437 | 2 | 38 | G:1 A:0                 |                |
| chr28 | 10400982 | 2 | 36 | T:0.916667              | C:0.0833333    |
| chr28 | 10401034 | 2 | 38 | T:0.868421              | C:0.131579     |
| chr28 | 10401176 | 2 | 38 | A:0.868421              | T:0.131579     |
| chr28 | 10401361 | 2 | 38 | A:0.894737              | G:0.105263     |
| chr28 | 10401442 | 2 | 38 | C:0.921053              | T:0.0789474    |
| chr28 | 10401785 | 2 | 38 | C:1 T:0                 |                |
| chr28 | 10401793 | 2 | 38 | G:1 A:0                 |                |
| chr28 | 10402031 | 2 | 38 | G:0.973684              | A:0.0263158    |
| chr28 | 10402078 | 2 | 38 | T:0.894737              | C:0.105263     |
| chr28 | 10402969 | 2 | 40 | C:1 T:0                 |                |
| chr28 | 10403312 | 2 | 40 | A:0.925 C:0.075         |                |
| chr28 | 10403318 | 2 | 40 | G:0.925 A:0.075         |                |
| chr28 | 10403424 | 2 | 34 | C:0.941176              | T:0.0588235    |
| chr28 | 10403627 | 2 | 34 | T:0.882353              | G:0.117647     |
| chr28 | 10403866 | 2 | 38 | T:0 C:1                 |                |
| chr28 | 10403925 | 2 | 38 | A:0.947368              | G:0.0526316    |
| chr28 | 10404228 | 2 | 38 | A:0.921053              | G:0.0789474    |
| chr28 | 10404455 | 2 | 28 | G:0 GT:1                |                |
| chr28 | 10404475 | 2 | 28 | T:0 TA:1                |                |
| chr28 | 10404477 | 2 | 28 | GA:0 G:1                |                |
| chr28 | 10404483 | 2 | 28 | AC:0 A:1                |                |
| chr28 | 10404523 | 2 | 38 | C:0.315789              | CT:0.684211    |
| chr28 | 10404526 | 2 | 38 | A:0.315789              | G:0.684211     |
| chr28 | 10404528 | 2 | 38 | A:0.315789              | G:0.684211     |
| chr28 | 10404530 | 2 | 38 | CG:0.315789             | C:0.684211     |
| chr28 | 10404532 | 2 | 38 | CG:0.315789             | C:0.684211     |
| chr28 | 10404536 | 2 | 38 | C:0.315789              | A:0.684211     |
| chr28 | 10404538 | 2 | 38 | C:0.315789              | A:0.684211     |
| chr28 | 10404550 | 2 | 38 | CCCCCCCCCTCCCG:0.315789 | C:0.684211     |
| chr28 | 10404948 | 2 | 38 | T:0.921053              | C:0.0789474    |
| chr28 | 10405303 | 2 | 40 | T:0.9 C:0.1             |                |
| chr28 | 10405445 | 2 | 34 | G:0.617647              | A:0.382353     |
| chr28 | 10405479 | 2 | 34 | T:0 TG:1                |                |
| chr28 | 10405525 | 2 | 38 | G:0 GT:1                |                |
| chr28 | 10405526 | 2 | 38 | A:0 G:1                 |                |
| chr28 | 10405552 | 2 | 40 | A:0 AT:1                |                |
| chr28 | 10405745 | 2 | 40 | T:0.95 C:0.05           |                |
| chr28 | 10405770 | 2 | 36 | G:1 A:0                 |                |
| chr28 | 10405847 | 2 | 34 | G:0.882353              | A:0.117647     |
| chr28 | 10406752 | 2 | 40 | C:1 T:0                 |                |
| chr28 | 10407069 | 2 | 38 | G:1 A:0                 |                |
| chr28 | 10407082 | 2 | 36 | G:0.916667              | A:0.0833333    |

|               |          |   |    |                   |                 |
|---------------|----------|---|----|-------------------|-----------------|
| chr28         | 10407326 | 2 | 38 | A:0.921053        | AT:0.0789474    |
| chr28         | 10407690 | 2 | 38 | T:0.894737        | C:0.105263      |
| chr28         | 10407941 | 2 | 40 | G:1               | A:0             |
| chr28         | 10407944 | 2 | 40 | A:1               | G:0             |
| chr28         | 10408200 | 2 | 40 | T:1               | C:0             |
| chr28         | 10408224 | 2 | 40 | G:1               | A:0             |
| chr28         | 10408225 | 2 | 40 | C:0.85            | A:0.15          |
| chr28         | 10408264 | 2 | 38 | A:0.842105        | C:0.157895      |
| chr28         | 10408297 | 2 | 40 | G:1               | A:0             |
| chr28         | 10408306 | 2 | 40 | C:1               | T:0             |
| chr28         | 10409581 | 2 | 36 | C:1               | T:0             |
| chr28         | 10409893 | 3 | 34 | CCTCT:0.441176    | C:0.235294      |
| CCT:0.323529  |          |   |    |                   |                 |
| chr28         | 10410057 | 2 | 40 | G:0.925           | A:0.075         |
| chr28         | 10410061 | 2 | 40 | T:0.925           | C:0.075         |
| chr28         | 10410483 | 2 | 36 | T:0.888889        | C:0.111111      |
| chr28         | 10410673 | 2 | 36 | C:1               | A:0             |
| chr28         | 10410775 | 2 | 34 | GACT:1            | G:0             |
| chr28         | 10410995 | 2 | 36 | A:1               | T:0             |
| chr28         | 10411027 | 2 | 38 | G:0.894737        | A:0.105263      |
| chr28         | 10411592 | 2 | 36 | C:0.944444        | CT:0.0555556    |
| chr28         | 10411745 | 2 | 40 | C:1               | T:0             |
| chr28         | 10411760 | 2 | 40 | A:1               | C:0             |
| chr28         | 10411798 | 2 | 40 | C:1               | T:0             |
| chr28         | 10411853 | 2 | 40 | T:1               | A:0             |
| chr28         | 10412125 | 2 | 40 | T:0.9             | C:0.1           |
| chr28         | 10412330 | 2 | 40 | A:1               | G:0             |
| chr28         | 10412347 | 2 | 40 | G:1               | A:0             |
| chr28         | 10412552 | 2 | 38 | C:1               | T:0             |
| chr28         | 10412857 | 2 | 38 | T:0.842105        | TC:0.157895     |
| chr28         | 10413499 | 2 | 38 | C:0.894737        | CG:0.105263     |
| chr28         | 10413599 | 2 | 38 | C:0.894737        | A:0.105263      |
| chr28         | 10413685 | 2 | 36 | A:0.916667        | G:0.0833333     |
| chr28         | 10414238 | 2 | 34 | C:0.882353        | CT:0.117647     |
| chr28         | 10414470 | 2 | 38 | T:0.921053        | C:0.0789474     |
| chr28         | 10414517 | 2 | 38 | G:0.947368        | A:0.0526316     |
| chr28         | 10414527 | 2 | 38 | C:0.947368        | T:0.0526316     |
| chr28         | 10415601 | 2 | 40 | AAAAAT:1          | A:0             |
| chr28         | 10415621 | 2 | 40 | TAAAATAAATA:0.925 | T:0.075         |
| chr28         | 10415626 | 2 | 40 | T:0.975           | TAAATA:0.025    |
| chr28         | 10417377 | 3 | 40 | CGAGAGAGAGAGA:0.7 | C:0.275         |
| CGAGAGA:0.025 |          |   |    |                   |                 |
| chr28         | 10417383 | 2 | 40 | A:1               | ATC:0           |
| chr28         | 10417945 | 2 | 38 | G:0.921053        | A:0.0789474     |
| chr28         | 10418020 | 2 | 38 | C:0.710526        | A:0.289474      |
| chr28         | 10418409 | 2 | 38 | C:0.973684        | T:0.0263158     |
| chr28         | 10418813 | 3 | 40 | CAT:0.775         | C:0.1           |
| 0.125         |          |   |    |                   |                 |
| chr28         | 10418846 | 2 | 40 | T:0.9             | A:0.1           |
| chr28         | 10418874 | 2 | 40 | G:0.925           | GTGTATATA:0.075 |
| chr28         | 10419697 | 2 | 38 | A:0.894737        | C:0.105263      |
| chr28         | 10419784 | 2 | 38 | T:0.815789        | TA:0.184211     |
| chr28         | 10420261 | 2 | 40 | T:0.85            | C:0.15          |
| chr28         | 10420334 | 2 | 38 | T:1               | C:0             |



|       |            |    |                      |              |
|-------|------------|----|----------------------|--------------|
| chr28 | 10420397 2 | 40 | G:0.925 T:0.075      |              |
| chr28 | 10420564 2 | 38 | T:0.894737           | C:0.105263   |
| chr28 | 10420766 2 | 40 | A:0.9 G:0.1          |              |
| chr28 | 10420781 2 | 40 | A:0.9 G:0.1          |              |
| chr28 | 10421296 2 | 38 | T:0.921053           | G:0.0789474  |
| chr28 | 10421541 2 | 36 | T:0.861111           | C:0.138889   |
| chr28 | 10421665 2 | 30 | A:0.833333           | G:0.166667   |
| chr28 | 10422136 2 | 34 | T:0.823529           | TA:0.176471  |
| chr28 | 10423036 2 | 36 | A:0.916667           | G:0.0833333  |
| chr28 | 10423544 2 | 40 | C:0.875 T:0.125      |              |
| chr28 | 10423594 2 | 40 | G:0.875 C:0.125      |              |
| chr28 | 10423598 2 | 40 | A:0.875 C:0.125      |              |
| chr28 | 10423967 2 | 40 | C:1 T:0              |              |
| chr28 | 10424083 2 | 40 | A:0.925 G:0.075      |              |
| chr28 | 10424214 2 | 38 | C:0.789474           | T:0.210526   |
| chr28 | 10424321 2 | 38 | T:0.921053           | TG:0.0789474 |
| chr28 | 10424506 2 | 40 | C:0.875 T:0.125      |              |
| chr28 | 10424645 2 | 38 | A:0.947368           | C:0.0526316  |
| chr28 | 10424808 2 | 38 | G:0.921053           | A:0.0789474  |
| chr28 | 10424814 2 | 38 | A:0.921053           | G:0.0789474  |
| chr28 | 10424852 2 | 36 | C:0.888889           | CT:0.111111  |
| chr28 | 10424875 2 | 38 | A:0.868421           | G:0.131579   |
| chr28 | 10425041 2 | 38 | CGTGTGT:0.947368     | C:0.0526316  |
| chr28 | 10425511 2 | 40 | G:0.925 A:0.075      |              |
| chr28 | 10425606 2 | 40 | T:0.925 C:0.075      |              |
| chr28 | 10425839 2 | 38 | T:0.868421           | A:0.131579   |
| chr28 | 10425952 2 | 40 | C:0.9 T:0.1          |              |
| chr28 | 10427022 2 | 36 | GC:0.888889          | G:0.111111   |
| chr28 | 10427176 2 | 38 | G:0.947368           | A:0.0526316  |
| chr28 | 10427759 2 | 40 | G:0.875 A:0.125      |              |
| chr28 | 10427979 2 | 38 | C:1 T:0              |              |
| chr28 | 10428209 2 | 34 | C:0.882353           | G:0.117647   |
| chr28 | 10428504 2 | 38 | A:0.921053           | G:0.0789474  |
| chr28 | 10428822 2 | 28 | AT:0.714286          | A:0.285714   |
| chr28 | 10428863 2 | 36 | G:0.888889           | A:0.111111   |
| chr28 | 10429206 2 | 40 | C:0.9 A:0.1          |              |
| chr28 | 10429290 2 | 40 | T:1 C:0              |              |
| chr28 | 10429814 2 | 38 | TC:0.921053          | T:0.0789474  |
| chr28 | 10430037 2 | 38 | C:0.894737           | T:0.105263   |
| chr28 | 10430172 2 | 34 | C:0.882353           | T:0.117647   |
| chr28 | 10431042 2 | 40 | C:0.975 CT:0.025     |              |
| chr28 | 10431233 2 | 40 | G:0.925 A:0.075      |              |
| chr28 | 10431502 2 | 40 | T:0.9 C:0.1          |              |
| chr28 | 10432230 2 | 38 | G:1 T:0              |              |
| chr28 | 10432245 2 | 40 | G:0.95 A:0.05        |              |
| chr28 | 10432448 2 | 38 | T:0.842105           | A:0.157895   |
| chr28 | 10432673 2 | 40 | C:0.625 T:0.375      |              |
| chr28 | 10433001 2 | 28 | AGAGAGAGGAG:0.928571 | A:           |
|       | 0.0714286  |    |                      |              |
| chr28 | 10433005 2 | 26 | AGAGGAG:0.769231     | A:0.230769   |
| chr28 | 10433007 2 | 22 | AGGAG:0.409091       | A:0.590909   |
| chr28 | 10434312 2 | 38 | A:0.868421           | G:0.131579   |
| chr28 | 10436203 2 | 36 | C:1 G:0              |              |
| chr28 | 10436522 2 | 38 | G:1 A:0              |              |

|       |          |   |    |                  |                   |
|-------|----------|---|----|------------------|-------------------|
| chr28 | 10437820 | 2 | 36 | C:0.972222       | G:0.0277778       |
| chr28 | 10438297 | 2 | 40 | G:0.6 T:0.4      |                   |
| chr28 | 10438805 | 2 | 40 | GCCAGGAC:0.875   | G:0.125           |
| chr28 | 10441394 | 2 | 40 | G:0.975 A:0.025  |                   |
| chr28 | 10441797 | 2 | 40 | G:0.575 C:0.425  |                   |
| chr28 | 10441989 | 2 | 34 | G:0.911765       | T:0.0882353       |
| chr28 | 10442087 | 2 | 36 | T:0.861111       | A:0.138889        |
| chr28 | 10442113 | 2 | 36 | A:0.888889       | AG:0.111111       |
| chr28 | 10442807 | 2 | 38 | A:0.973684       | C:0.0263158       |
| chr28 | 10443124 | 2 | 34 | C:0.941176       | CCT:0.0588235     |
| chr28 | 10443155 | 2 | 38 | TA:0.947368      | T:0.0526316       |
| chr28 | 10443174 | 2 | 38 | A:0.947368       | AAAATTT:0.0526316 |
| chr28 | 10443485 | 2 | 40 | A:0.925 T:0.075  |                   |
| chr28 | 10443497 | 2 | 40 | TA:0.925 T:0.075 |                   |
| chr28 | 10443670 | 2 | 40 | T:0.975 TA:0.025 |                   |
| chr28 | 10443950 | 2 | 38 | T:1 TAA:0        |                   |
| chr28 | 10443955 | 2 | 38 | A:0.342105       | AAT:0.657895      |
| chr28 | 10444272 | 2 | 38 | A:0.947368       | G:0.0526316       |
| chr28 | 10444470 | 2 | 40 | A:0.95 T:0.05    |                   |
| chr28 | 10444772 | 2 | 40 | C:0.975 T:0.025  |                   |
| chr28 | 10445301 | 2 | 36 | C:0.916667       | T:0.0833333       |
| chr28 | 10445305 | 2 | 36 | T:1 C:0          |                   |
| chr28 | 10445326 | 2 | 38 | C:0.894737       | G:0.105263        |
| chr28 | 10445406 | 2 | 38 | C:0.973684       | A:0.0263158       |
| chr28 | 10445550 | 2 | 40 | C:0.925 A:0.075  |                   |
| chr28 | 10445640 | 2 | 40 | C:0.925 T:0.075  |                   |
| chr28 | 10446428 | 2 | 40 | C:1 T:0          |                   |
| chr28 | 10446700 | 2 | 40 | T:0.95 C:0.05    |                   |
| chr28 | 10446807 | 2 | 36 | T:0.944444       | C:0.0555556       |
| chr28 | 10446829 | 2 | 38 | G:1 A:0          |                   |
| chr28 | 10446843 | 2 | 38 | G:1 A:0          |                   |
| chr28 | 10447462 | 2 | 40 | T:0.875 C:0.125  |                   |
| chr28 | 10447683 | 2 | 38 | C:0.973684       | T:0.0263158       |
| chr28 | 10447739 | 2 | 36 | G:0.833333       | GT:0.166667       |
| chr28 | 10447794 | 2 | 36 | C:0.777778       | CAG:0.222222      |
| chr28 | 10448124 | 2 | 34 | A:0.911765       | G:0.0882353       |
| chr28 | 10448364 | 2 | 40 | A:0.95 G:0.05    |                   |
| chr28 | 10449013 | 2 | 38 | G:0.973684       | A:0.0263158       |
| chr28 | 10449165 | 2 | 36 | T:0.972222       | C:0.0277778       |
| chr28 | 10449174 | 2 | 36 | G:0.972222       | A:0.0277778       |
| chr28 | 10449975 | 2 | 40 | C:0.95 T:0.05    |                   |
| chr28 | 10449977 | 2 | 40 | A:0.95 C:0.05    |                   |
| chr28 | 10450144 | 2 | 38 | A:0.947368       | T:0.0526316       |
| chr28 | 10450153 | 3 | 40 | TA:0.9 T:0.05    | TAA:0.05          |
| chr28 | 10450155 | 2 | 38 | A:0.947368       | T:0.0526316       |
| chr28 | 10451487 | 2 | 40 | TCA:0.725        | T:0.275           |
| chr28 | 10451760 | 2 | 40 | C:0.725 T:0.275  |                   |
| chr28 | 10453124 | 2 | 40 | G:0.775 T:0.225  |                   |
| chr28 | 10453220 | 2 | 32 | C:0.21875        | T:0.78125         |
| chr28 | 10453221 | 2 | 32 | T:0.21875        | G:0.78125         |
| chr28 | 10453340 | 2 | 40 | G:0.15 A:0.85    |                   |
| chr28 | 10453397 | 2 | 36 | G:1 A:0          |                   |
| chr28 | 10453654 | 2 | 40 | T:0.2 C:0.8      |                   |
| chr28 | 10454031 | 2 | 40 | C:0.15 T:0.85    |                   |

|       |            |    |                   |             |
|-------|------------|----|-------------------|-------------|
| chr28 | 10454118 2 | 38 | G:0.947368        | A:0.0526316 |
| chr28 | 10455483 2 | 38 | G:0.947368        | A:0.0526316 |
| chr28 | 10455514 2 | 40 | T:0.925 C:0.075   |             |
| chr28 | 10456454 2 | 36 | T:0 C:1           |             |
| chr28 | 10456632 2 | 38 | C:0.947368        | T:0.0526316 |
| chr28 | 10457104 2 | 40 | AT:0.05 A:0.95    |             |
| chr28 | 10457244 2 | 40 | A:0.95 T:0.05     |             |
| chr28 | 10457252 2 | 40 | C:0.95 T:0.05     |             |
| chr28 | 10457765 2 | 38 | T:0.947368        | G:0.0526316 |
| chr28 | 10458109 2 | 40 | G:0.875 A:0.125   |             |
| chr28 | 10458290 2 | 32 | G:0 A:1           |             |
| chr28 | 10458604 2 | 36 | A:0 G:1           |             |
| chr28 | 10458825 2 | 40 | A:0 C:1           |             |
| chr28 | 10459013 2 | 40 | G:0.95 A:0.05     |             |
| chr28 | 10460830 2 | 40 | T:0.95 C:0.05     |             |
| chr28 | 10460841 2 | 40 | A:0.975 G:0.025   |             |
| chr28 | 10461036 2 | 40 | A:1 G:0           |             |
| chr28 | 10461926 2 | 38 | A:0.973684        | G:0.0263158 |
| chr28 | 10462118 2 | 38 | A:0.0263158       | C:0.973684  |
| chr28 | 10462141 2 | 40 | C:1 T:0           |             |
| chr28 | 10462648 2 | 34 | C:1 T:0           |             |
| chr28 | 10462900 2 | 36 | T:0.944444        | C:0.0555556 |
| chr28 | 10463060 2 | 34 | A:0.911765        | G:0.0882353 |
| chr28 | 10463186 2 | 40 | T:0 C:1           |             |
| chr28 | 10463187 2 | 40 | G:0 A:1           |             |
| chr28 | 10463400 2 | 40 | AT:1 A:0          |             |
| chr28 | 10463475 2 | 38 | CGGCTTT:0.0263158 | C:          |
|       | 0.973684   |    |                   |             |
| chr28 | 10463618 2 | 38 | C:0 T:1           |             |
| chr28 | 10463649 2 | 38 | A:0 G:1           |             |
| chr28 | 10463654 2 | 38 | A:0 C:1           |             |
| chr28 | 10464467 2 | 40 | CT:0 C:1          |             |
| chr28 | 10465467 2 | 40 | G:0.05 A:0.95     |             |
| chr28 | 10466178 2 | 34 | A:0 T:1           |             |
| chr28 | 10466668 2 | 38 | G:0.0263158       | A:0.973684  |
| chr28 | 10467048 2 | 34 | C:0.852941        | CT:0.147059 |
| chr28 | 10468099 2 | 38 | C:0 T:1           |             |
| chr28 | 10468140 2 | 38 | C:0 T:1           |             |
| chr28 | 10468190 2 | 38 | A:0 T:1           |             |
| chr28 | 10468601 2 | 36 | A:0 C:1           |             |
| chr28 | 10468818 2 | 38 | C:1 T:0           |             |
| chr28 | 10469513 2 | 36 | GT:1 G:0          |             |
| chr28 | 10469933 2 | 38 | T:0.921053        | C:0.0789474 |
| chr28 | 10470363 2 | 38 | G:0.973684        | A:0.0263158 |
| chr28 | 10470454 2 | 38 | C:1 T:0           |             |
| chr28 | 10471019 2 | 40 | T:0.95 C:0.05     |             |
| chr28 | 10471128 2 | 38 | A:0.921053        | G:0.0789474 |
| chr28 | 10471268 2 | 38 | G:0 T:1           |             |
| chr28 | 10471749 2 | 40 | G:1 C:0           |             |
| chr28 | 10472372 2 | 38 | G:0 C:1           |             |
| chr28 | 10472382 2 | 38 | C:0 T:1           |             |
| chr28 | 10472405 2 | 38 | A:0 G:1           |             |
| chr28 | 10472496 2 | 40 | T:0 C:1           |             |
| chr28 | 10472721 2 | 40 | G:1 A:0           |             |

|       |          |   |    |                         |            |                 |  |
|-------|----------|---|----|-------------------------|------------|-----------------|--|
| chr28 | 10473124 | 2 | 36 | C:1                     | T:0        |                 |  |
| chr28 | 10473220 | 2 | 36 | C:1                     | A:0        |                 |  |
| chr28 | 10473702 | 2 | 38 | A:0.947368              |            | G:0.0526316     |  |
| chr28 | 10474306 | 2 | 40 | G:1                     | T:0        |                 |  |
| chr28 | 10474709 | 2 | 40 | C:0                     | G:1        |                 |  |
| chr28 | 10474800 | 2 | 40 | A:0                     | G:1        |                 |  |
| chr28 | 10475240 | 2 | 40 | CAAAT:0.025             |            | C:0.975         |  |
| chr28 | 10476277 | 2 | 40 | A:0.025                 | AT:0.975   |                 |  |
| chr28 | 10476460 | 2 | 36 | CAG:0.888889            |            | C:0.111111      |  |
| chr28 | 10477100 | 2 | 40 | G:0                     | C:1        |                 |  |
| chr28 | 10477151 | 2 | 38 | G:0                     | A:1        |                 |  |
| chr28 | 10477238 | 2 | 40 | T:1                     | A:0        |                 |  |
| chr28 | 10477792 | 2 | 40 | TG:0                    | T:1        |                 |  |
| chr28 | 10477931 | 2 | 38 | G:0                     | A:1        |                 |  |
| chr28 | 10478437 | 2 | 32 | AT:0                    | A:1        |                 |  |
| chr28 | 10478679 | 2 | 40 | G:0.05                  | A:0.95     |                 |  |
| chr28 | 10478862 | 2 | 38 | A:0                     | G:1        |                 |  |
| chr28 | 10479039 | 2 | 40 | C:1                     | T:0        |                 |  |
| chr28 | 10479052 | 2 | 40 | T:1                     | C:0        |                 |  |
| chr28 | 10479655 | 2 | 38 | C:1                     | A:0        |                 |  |
| chr28 | 10479729 | 2 | 40 | TACATACATATACAC:0.05    |            | T:0.95          |  |
| chr28 | 10480199 | 2 | 40 | T:0.95                  | A:0.05     |                 |  |
| chr28 | 10480614 | 2 | 38 | C:1                     | A:0        |                 |  |
| chr28 | 10480617 | 2 | 40 | A:0.95                  | T:0.05     |                 |  |
| chr28 | 10480627 | 2 | 40 | C:0.825                 | T:0.175    |                 |  |
| chr28 | 10480657 | 2 | 40 | A:0.95                  | C:0.05     |                 |  |
| chr28 | 10480753 | 2 | 34 | CAAA:1                  | C:0        |                 |  |
| chr28 | 10480930 | 2 | 40 | G:0.075                 | A:0.925    |                 |  |
| chr28 | 10481065 | 2 | 38 | T:0.947368              |            | C:0.0526316     |  |
| chr28 | 10481291 | 2 | 38 | G:1                     | A:0        |                 |  |
| chr28 | 10481321 | 2 | 38 | G:0.894737              |            | A:0.105263      |  |
| chr28 | 10481705 | 2 | 38 | G:0.973684              |            | A:0.0263158     |  |
| chr28 | 10481790 | 2 | 36 | G:1                     | A:0        |                 |  |
| chr28 | 10482555 | 2 | 38 | T:0.947368              |            | A:0.0526316     |  |
| chr28 | 10482662 | 2 | 38 | A:1                     | G:0        |                 |  |
| chr28 | 10482683 | 2 | 38 | C:0.947368              |            | CAGTT:0.0526316 |  |
| chr28 | 10482915 | 2 | 38 | A:0.947368              |            | C:0.0526316     |  |
| chr28 | 10483086 | 2 | 34 | A:0.911765              |            | G:0.0882353     |  |
| chr28 | 10483165 | 2 | 40 | G:1                     | A:0        |                 |  |
| chr28 | 10484059 | 2 | 38 | A:0                     | T:1        |                 |  |
| chr28 | 10484244 | 2 | 36 | C:1                     | G:0        |                 |  |
| chr28 | 10484531 | 2 | 40 | AGAGGATGGATAGGTGAAG:0.9 |            | A:0.1           |  |
| chr28 | 10484723 | 2 | 40 | A:0.95                  | G:0.05     |                 |  |
| chr28 | 10484729 | 2 | 40 | C:0.95                  | T:0.05     |                 |  |
| chr28 | 10484756 | 2 | 40 | A:0.95                  | AC:0.05    |                 |  |
| chr28 | 10484941 | 2 | 38 | A:0.947368              |            | G:0.0526316     |  |
| chr28 | 10485235 | 2 | 38 | C:0.973684              |            | T:0.0263158     |  |
| chr28 | 10485354 | 2 | 40 | G:0.05                  | A:0.95     |                 |  |
| chr28 | 10485410 | 2 | 40 | G:1                     | A:0        |                 |  |
| chr28 | 10485591 | 2 | 38 | A:0.973684              |            | G:0.0263158     |  |
| chr28 | 10485726 | 2 | 38 | T:1                     | C:0        |                 |  |
| chr28 | 10485753 | 2 | 36 | T:0.944444              |            | C:0.0555556     |  |
| chr28 | 10486174 | 2 | 40 | A:0.075                 | G:0.925    |                 |  |
| chr28 | 10486240 | 2 | 40 | C:0.05                  | CTAAA:0.95 |                 |  |

|       |             |    |                  |              |
|-------|-------------|----|------------------|--------------|
| chr28 | 10486311 2  | 38 | T:0.973684       | A:0.0263158  |
| chr28 | 10486438 2  | 34 | C:0.0294118      | A:0.970588   |
| chr28 | 10486495 2  | 40 | C:0 G:1          |              |
| chr28 | 10487737 2  | 36 | A:0 G:1          |              |
| chr28 | 10487775 2  | 40 | G:0.075 A:0.925  |              |
| chr28 | 10488156 2  | 40 | T:1 C:0          |              |
| chr28 | 10488182 2  | 40 | T:0.95 C:0.05    |              |
| chr28 | 10488230 2  | 40 | G:0 A:1          |              |
| chr28 | 10488231 2  | 40 | T:0 C:1          |              |
| chr28 | 10488467 2  | 40 | C:1 CT:0         |              |
| chr28 | 10488606 2  | 36 | T:0.944444       | C:0.0555556  |
| chr28 | 10488873 2  | 40 | AC:1 A:0         |              |
| chr28 | 10488986 2  | 38 | G:1 A:0          |              |
| chr28 | 10489224 2  | 40 | A:0.975 G:0.025  |              |
| chr28 | 10489255 2  | 40 | A:0.025 C:0.975  |              |
| chr28 | 10489259 2  | 40 | A:0.025 G:0.975  |              |
| chr28 | 10489306 2  | 38 | C:0.0526316      | CCA:0.947368 |
| chr28 | 10489446 2  | 40 | CA:0.925 C:0.075 |              |
| chr28 | 10489453 2  | 40 | G:0.925 C:0.075  |              |
| chr28 | 10489887 2  | 40 | G:0 T:1          |              |
| chr28 | 10489978 2  | 38 | T:0 G:1          |              |
| chr28 | 10490118 2  | 40 | T:0 C:1          |              |
| chr28 | 10490313 2  | 36 | A:0.944444       | T:0.0555556  |
| chr28 | 10490316 2  | 36 | G:0 C:1          |              |
| chr28 | 10490690 2  | 38 | G:1 A:0          |              |
| chr28 | 10490875 2  | 34 | G:0 A:1          |              |
| chr28 | 10490928 2  | 38 | GAC:1 G:0        |              |
| chr28 | 10490959 2  | 40 | G:0.025 A:0.975  |              |
| chr28 | 10490970 2  | 40 | T:1 A:0          |              |
| chr28 | 10491278 2  | 40 | G:0.075 A:0.925  |              |
| chr28 | 10491324 2  | 40 | C:0 T:1          |              |
| chr28 | 10491898 2  | 36 | T:1 C:0          |              |
| chr28 | 10492084 2  | 40 | A:0 G:1          |              |
| chr28 | 10492096 2  | 40 | G:1 A:0          |              |
| chr28 | 10492234 2  | 38 | T:1 A:0          |              |
| chr28 | 10492251 2  | 38 | A:1 T:0          |              |
| chr28 | 10492788 2  | 40 | C:0.95 T:0.05    |              |
| chr28 | 10493120 2  | 38 | C:0 T:1          |              |
| chr28 | 10493336 2  | 40 | T:0.95 C:0.05    |              |
| chr28 | 10493467 2  | 40 | G:1 C:0          |              |
| chr28 | 10493542 2  | 38 | G:1 GC:0         |              |
| chr28 | 10493971 3  | 38 | CTT:0.157895     | C:0.131579   |
|       | CT:0.710526 |    |                  |              |
| chr28 | 10494096 2  | 34 | G:1 C:0          |              |
| chr28 | 10494328 2  | 40 | CA:0.95 C:0.05   |              |
| chr28 | 10494341 2  | 40 | G:0.725 A:0.275  |              |
| chr28 | 10494349 2  | 40 | A:0 G:1          |              |
| chr28 | 10494830 2  | 40 | T:0 C:1          |              |
| chr28 | 10494838 2  | 40 | T:0 C:1          |              |
| chr28 | 10494914 2  | 34 | T:0 C:1          |              |
| chr28 | 10495072 2  | 40 | C:1 T:0          |              |
| chr28 | 10495147 2  | 38 | C:0.973684       | T:0.0263158  |
| chr28 | 10495571 2  | 38 | G:0.973684       | T:0.0263158  |
| chr28 | 10495874 2  | 40 | C:1 T:0          |              |

|               |            |    |                                   |              |
|---------------|------------|----|-----------------------------------|--------------|
| chr28         | 10495926 2 | 38 | A:0.921053                        | G:0.0789474  |
| chr28         | 10496120 2 | 40 | TAAGAAGAGGAAAAGAAAAAAAAAAAAA:0.9  |              |
| T:0.1         |            |    |                                   |              |
| chr28         | 10496286 2 | 38 | A:0.0526316                       | G:0.947368   |
| chr28         | 10496348 2 | 38 | G:0.0789474                       | T:0.921053   |
| chr28         | 10496390 2 | 38 | A:0.947368                        | G:0.0526316  |
| chr28         | 10496416 2 | 38 | A:0.947368                        | G:0.0526316  |
| chr28         | 10496501 2 | 40 | T:1                               | C:0          |
| chr28         | 10496502 2 | 40 | G:1                               | A:0          |
| chr28         | 10496557 2 | 38 | G:1                               | A:0          |
| chr28         | 10496630 2 | 38 | C:1                               | T:0          |
| chr28         | 10496764 2 | 36 | G:0.0833333                       | A:0.916667   |
| chr28         | 10496770 2 | 36 | G:1                               | C:0          |
| chr28         | 10496875 2 | 38 | A:0                               | C:1          |
| chr28         | 10497044 2 | 38 | T:1                               | C:0          |
| chr28         | 10497105 2 | 40 | AAGG:0.05                         | A:0.95       |
| chr28         | 10497318 2 | 24 | A:0                               | G:1          |
| chr28         | 10497383 2 | 28 | C:0.0714286                       | A:0.928571   |
| chr28         | 10497468 2 | 28 | G:1                               | A:0          |
| chr28         | 10497554 2 | 32 | G:0.9375                          | A:0.0625     |
| chr28         | 10497558 2 | 32 | C:0.9375                          | T:0.0625     |
| chr28         | 10497565 2 | 32 | C:0.9375                          | A:0.0625     |
| chr28         | 10497589 2 | 32 | A:0                               | C:1          |
| chr28         | 10497592 2 | 32 | G:0                               | C:1          |
| chr28         | 10497660 2 | 36 | G:0.972222                        | A:0.0277778  |
| chr28         | 10497693 2 | 36 | A:0                               | AC:1         |
| chr28         | 10497725 2 | 38 | A:0.973684                        | C:0.0263158  |
| chr28         | 10497773 2 | 38 | A:0.973684                        | G:0.0263158  |
| chr28         | 10498021 2 | 40 | T:0.05                            | C:0.95       |
| chr28         | 10498078 2 | 40 | A:0.025                           | G:0.975      |
| chr28         | 10498147 4 | 40 | GCACACA:0.075                     | G:0.85 GCA:  |
| 0.025         | GCACA:0.05 |    |                                   |              |
| chr28         | 10498448 2 | 38 | G:0.973684                        | A:0.0263158  |
| chr28         | 10498511 2 | 36 | T:1                               | G:0          |
| chr28         | 10498541 2 | 38 | AGGTCCTGTCTGGTAACAGGACCT:0.894737 |              |
| A:0.105263    |            |    |                                   |              |
| chr28         | 10498710 2 | 40 | C:0.975                           | T:0.025      |
| chr28         | 10498723 2 | 40 | T:0.975                           | C:0.025      |
| chr28         | 10499073 2 | 40 | C:0                               | CA:1         |
| chr28         | 10499137 2 | 40 | C:0.975                           | T:0.025      |
| chr28         | 10499219 2 | 40 | TC:0.95                           | T:0.05       |
| chr28         | 10499282 2 | 30 | TA:0.633333                       | T:0.366667   |
| chr28         | 10499359 2 | 38 | G:0.921053                        | C:0.0789474  |
| chr28         | 10499416 2 | 38 | A:0.973684                        | T:0.0263158  |
| chr28         | 10499501 2 | 40 | CA:0.95                           | C:0.05       |
| chr28         | 10499571 2 | 40 | G:0.975                           | A:0.025      |
| chr28         | 10499708 2 | 40 | T:0.95                            | C:0.05       |
| chr28         | 10499713 2 | 40 | T:1                               | C:0          |
| chr28         | 10499878 2 | 36 | A:0                               | G:1          |
| chr28         | 10500007 2 | 40 | T:0.975                           | C:0.025      |
| chr28         | 10500100 3 | 38 | T:0.921053                        | TA:0.0263158 |
| TAA:0.0526316 |            |    |                                   |              |
| chr28         | 10500406 2 | 38 | C:0.973684                        | T:0.0263158  |
| chr28         | 10500445 2 | 40 | C:0.95                            | T:0.05       |

|              |            |    |                 |            |             |
|--------------|------------|----|-----------------|------------|-------------|
| chr28        | 10500483 2 | 40 | G:0.975         | A:0.025    |             |
| chr28        | 10500524 2 | 38 | G:0.947368      |            | A:0.0526316 |
| chr28        | 10500529 2 | 38 | G:0.947368      |            | A:0.0526316 |
| chr28        | 10500978 2 | 32 | A:0.9375        | G:0.0625   |             |
| chr28        | 10501240 2 | 40 | A:0.975         | G:0.025    |             |
| chr28        | 10501364 2 | 36 | G:1             | C:0        |             |
| chr28        | 10501382 2 | 38 | A:1             | G:0        |             |
| chr28        | 10501385 2 | 38 | A:1             | G:0        |             |
| chr28        | 10501432 2 | 40 | T:0.95          | C:0.05     |             |
| chr28        | 10501443 2 | 40 | A:0.875         | G:0.125    |             |
| chr28        | 10501454 2 | 40 | G:1             | A:0        |             |
| chr28        | 10501493 2 | 40 | G:0.95          | C:0.05     |             |
| chr28        | 10501534 2 | 40 | C:1             | T:0        |             |
| chr28        | 10501548 2 | 40 | C:1             | T:0        |             |
| chr28        | 10501639 2 | 36 | G:0.972222      |            | A:0.0277778 |
| chr28        | 10501640 2 | 36 | T:0.972222      |            | G:0.0277778 |
| chr28        | 10501691 2 | 38 | A:0.947368      |            | G:0.0526316 |
| chr28        | 10501816 2 | 38 | T:0.921053      |            | C:0.0789474 |
| chr28        | 10501919 2 | 36 | T:0.944444      |            | G:0.0555556 |
| chr28        | 10502181 2 | 38 | A:1             | C:0        |             |
| chr28        | 10502226 2 | 36 | A:0.916667      |            | G:0.0833333 |
| chr28        | 10502518 2 | 38 | A:0.684211      |            | G:0.315789  |
| chr28        | 10502522 2 | 38 | G:1             | A:0        |             |
| chr28        | 10502601 2 | 38 | T:1             | C:0        |             |
| chr28        | 10502730 2 | 38 | C:0             | G:1        |             |
| chr28        | 10502893 2 | 40 | T:0.925         | C:0.075    |             |
| chr28        | 10503172 2 | 38 | G:1             | A:0        |             |
| chr28        | 10503199 2 | 38 | C:1             | T:0        |             |
| chr28        | 10503801 2 | 32 | CTTTTCTT:0.1875 |            | C:0.8125    |
| chr28        | 10503808 2 | 40 | T:1             | TTTTTC:0   |             |
| chr28        | 10503843 2 | 36 | CTTT:0.972222   |            | C:0.0277778 |
| chr28        | 10504846 2 | 34 | G:0.941176      |            | T:0.0588235 |
| chr28        | 10505578 2 | 36 | TGA:0.972222    |            | T:0.0277778 |
| chr28        | 10505851 2 | 36 | CT:1            | C:0        |             |
| chr28        | 10506237 2 | 38 | A:0.973684      |            | C:0.0263158 |
| chr28        | 10506576 2 | 38 | G:0.947368      |            | A:0.0526316 |
| chr28        | 10506774 2 | 36 | T:0.0277778     |            | C:0.972222  |
| chr28        | 10506846 2 | 40 | T:0.95          | C:0.05     |             |
| chr28        | 10506862 2 | 40 | C:0.95          | CCTTG:0.05 |             |
| chr28        | 10506923 2 | 34 | A:0.970588      |            | G:0.0294118 |
| chr28        | 10507097 2 | 38 | T:0.947368      |            | C:0.0526316 |
| chr28        | 10507576 2 | 36 | C:0.944444      |            | T:0.0555556 |
| chr28        | 10507885 2 | 38 | C:1             | G:0        |             |
| chr28        | 10507946 2 | 34 | T:0.941176      |            | C:0.0588235 |
| chr28        | 10507957 2 | 18 | C:0.277778      |            | CT:0.722222 |
| chr28        | 10508091 2 | 38 | C:0.868421      |            | T:0.131579  |
| chr28        | 10508159 3 | 36 | TAA:0.833333    |            | T:0.0833333 |
| TA:0.0833333 |            |    |                 |            |             |
| chr28        | 10508191 2 | 28 | C:1             | CT:0       |             |
| chr28        | 10508347 2 | 36 | A:0.972222      |            | G:0.0277778 |
| chr28        | 10508357 2 | 36 | T:0.972222      |            | C:0.0277778 |
| chr28        | 10508629 2 | 40 | C:1             | T:0        |             |
| chr28        | 10509066 2 | 38 | G:0             | T:1        |             |
| chr28        | 10511315 2 | 40 | T:0.075         | C:0.925    |             |

|          |          |   |    |             |                 |              |      |
|----------|----------|---|----|-------------|-----------------|--------------|------|
| chr28    | 10512059 | 2 | 40 | G:1         | A:0             |              |      |
| chr28    | 10512115 | 2 | 40 | T:0.925     | TTCTCTCTC:0.075 |              |      |
| chr28    | 10512616 | 2 | 40 | G:0.575     | GT:0.425        |              |      |
| chr28    | 10512620 | 2 | 40 | T:1         | G:0             |              |      |
| chr28    | 10512669 | 2 | 40 | T:0.975     | C:0.025         |              |      |
| chr28    | 10512749 | 2 | 40 | T:0.975     | C:0.025         |              |      |
| chr28    | 10513085 | 2 | 40 | A:0.025     | G:0.975         |              |      |
| chr28    | 10513322 | 2 | 40 | C:0.8       | T:0.2           |              |      |
| chr28    | 10513530 | 2 | 34 | G:0.970588  |                 | T:0.0294118  |      |
| chr28    | 10514199 | 2 | 38 | C:0.0263158 |                 | T:0.973684   |      |
| chr28    | 10514412 | 2 | 38 | A:0         | G:1             |              |      |
| chr28    | 10514583 | 2 | 38 | C:0         | T:1             |              |      |
| chr28    | 10515232 | 2 | 38 | A:0         | G:1             |              |      |
| chr28    | 10515282 | 2 | 38 | T:0         | A:1             |              |      |
| chr28    | 10515351 | 3 | 38 | A:1         | T:0             | AT:0         |      |
| chr28    | 10515445 | 2 | 40 | G:1         | A:0             |              |      |
| chr28    | 10516428 | 2 | 36 | T:1         | G:0             |              |      |
| chr28    | 10516548 | 2 | 38 | T:1         | C:0             |              |      |
| chr28    | 10517160 | 2 | 36 | A:0         | G:1             |              |      |
| chr28    | 10517313 | 2 | 40 | T:0.075     | C:0.925         |              |      |
| chr28    | 10517345 | 2 | 40 | A:0.075     | G:0.925         |              |      |
| chr28    | 10517435 | 2 | 18 | C:0.222222  |                 | T:0.777778   |      |
| chr28    | 10517439 | 2 | 18 | T:0.222222  |                 | TCC:0.777778 |      |
| chr28    | 10517453 | 2 | 34 | T:0.882353  |                 | TCA:0.117647 |      |
| chr28    | 10517690 | 2 | 38 | G:0.0789474 |                 | A:0.921053   |      |
| chr28    | 10517787 | 2 | 40 | C:0.05      | T:0.95          |              |      |
| chr28    | 10517820 | 2 | 40 | C:0.075     | T:0.925         |              |      |
| chr28    | 10518033 | 2 | 38 | T:1         | C:0             |              |      |
| chr28    | 10518080 | 2 | 38 | G:1         | GT:0            |              |      |
| chr28    | 10518081 | 3 | 38 | G:0.157895  |                 | T:0          | GTT: |
| 0.842105 |          |   |    |             |                 |              |      |
| chr28    | 10518269 | 2 | 38 | G:1         | A:0             |              |      |
| chr28    | 10518280 | 2 | 36 | C:1         | G:0             |              |      |
| chr28    | 10518281 | 2 | 36 | C:0.833333  |                 | T:0.166667   |      |
| chr28    | 10518374 | 2 | 38 | G:1         | C:0             |              |      |
| chr28    | 10518411 | 2 | 34 | G:1         | C:0             |              |      |
| chr28    | 10518497 | 2 | 32 | CG:1        | C:0             |              |      |
| chr28    | 10519342 | 2 | 16 | AG:0        | A:1             |              |      |
| chr28    | 10519353 | 2 | 14 | TC:0        | T:1             |              |      |
| chr28    | 10519366 | 2 | 8  | TC:0        | T:1             |              |      |
| chr28    | 10519388 | 2 | 8  | CT:0        | C:1             |              |      |
| chr28    | 10519430 | 2 | 10 | CT:0        | C:1             |              |      |
| chr28    | 10519534 | 2 | 18 | A:0.166667  |                 | G:0.833333   |      |
| chr28    | 10519546 | 2 | 18 | A:0.166667  |                 | ACC:0.833333 |      |
| chr28    | 10519548 | 2 | 18 | A:0.166667  |                 | G:0.833333   |      |
| chr28    | 10519654 | 2 | 34 | G:1         | C:0             |              |      |
| chr28    | 10519675 | 2 | 36 | G:1         | C:0             |              |      |
| chr28    | 10519739 | 2 | 32 | T:0.4375    | C:0.5625        |              |      |
| chr28    | 10519864 | 2 | 30 | G:0.366667  |                 | A:0.633333   |      |
| chr28    | 10520051 | 2 | 16 | AG:0.5      | A:0.5           |              |      |
| chr28    | 10520150 | 2 | 40 | A:1         | G:0             |              |      |
| chr28    | 10520305 | 2 | 34 | C:1         | G:0             |              |      |
| chr28    | 10520332 | 2 | 34 | AG:0.382353 |                 | A:0.617647   |      |
| chr28    | 10520668 | 2 | 40 | G:0.375     | A:0.625         |              |      |



|               |                     |   |    |                         |         |                |
|---------------|---------------------|---|----|-------------------------|---------|----------------|
| chr28         | 10520890            | 2 | 38 | C:1                     | CG:0    |                |
| chr28         | 10520935            | 2 | 38 | C:0.526316              |         | T:0.473684     |
| chr28         | 10521102            | 2 | 40 | A:0.475                 | G:0.525 |                |
| chr28         | 10521620            | 2 | 32 | C:1                     | G:0     |                |
| chr28         | 10522208            | 2 | 38 | C:0.526316              |         | A:0.473684     |
| chr28         | 10522366            | 2 | 36 | C:1                     | T:0     |                |
| chr28         | 10522633            | 2 | 38 | A:0.447368              |         | G:0.552632     |
| chr28         | 10522956            | 2 | 34 | A:0.352941              |         | AT:0.647059    |
| chr28         | 10522983            | 2 | 38 | T:1                     | G:0     |                |
| chr28         | 10523071            | 2 | 34 | A:0.588235              |         | G:0.411765     |
| chr28         | 10523174            | 2 | 40 | G:1                     | A:0     |                |
| chr28         | 10523305            | 2 | 38 | A:1                     | G:0     |                |
| chr28         | 10523777            | 2 | 40 | A:0.45                  | G:0.55  |                |
| chr28         | 10523822            | 2 | 40 | G:1                     | A:0     |                |
| chr28         | 10524256            | 2 | 38 | A:0.447368              |         | G:0.552632     |
| chr28         | 10524518            | 2 | 40 | T:0.5                   | G:0.5   |                |
| chr28         | 10524932            | 2 | 40 | T:0.4                   | C:0.6   |                |
| chr28         | 10525567            | 2 | 36 | G:0.611111              |         | A:0.388889     |
| chr28         | 10525601            | 2 | 40 | T:1                     | A:0     |                |
| chr28         | 10525681            | 2 | 40 | C:0.625                 | T:0.375 |                |
| chr28         | 10525713            | 2 | 38 | A:1                     | AT:0    |                |
| chr28         | 10525755            | 4 | 40 | CAGAGAGAGAG:0           |         | C:0.1 CAGAGAG: |
| 0.425         | CAGAGAGAG:0.475     |   |    |                         |         |                |
| chr28         | 10525997            | 2 | 40 | A:0.675                 | C:0.325 |                |
| chr28         | 10526376            | 5 | 40 | GAATAAATA:0.675         | G:0.25  | GAATA:         |
| 0.05          | GAATAAATAAATA:0.025 |   |    | GAATAAATAAATAAATAAATA:0 |         |                |
| chr28         | 10526519            | 2 | 36 | A:0.583333              |         | G:0.416667     |
| chr28         | 10527997            | 2 | 40 | G:0.6                   | T:0.4   |                |
| chr28         | 10528186            | 2 | 38 | GA:1                    | G:0     |                |
| chr28         | 10528530            | 2 | 36 | A:1                     | AT:0    |                |
| chr28         | 10528700            | 2 | 38 | G:0.631579              |         | C:0.368421     |
| chr28         | 10528814            | 2 | 40 | C:0.65                  | T:0.35  |                |
| chr28         | 10528977            | 2 | 40 | C:1                     | G:0     |                |
| chr28         | 10529218            | 2 | 40 | T:0.6                   | C:0.4   |                |
| chr28         | 10529380            | 2 | 36 | C:0.611111              |         | G:0.388889     |
| chr28         | 10529384            | 2 | 36 | C:0.638889              |         | A:0.361111     |
| chr28         | 10529489            | 3 | 38 | TA:0.631579             |         | T:0.342105     |
| TAA:0.0263158 |                     |   |    |                         |         |                |
| chr28         | 10529526            | 2 | 36 | C:0.527778              |         | CTCTG:0.472222 |
| chr28         | 10530570            | 2 | 40 | G:1                     | A:0     |                |
| chr28         | 10531210            | 2 | 40 | A:1                     | G:0     |                |
| chr28         | 10531444            | 2 | 36 | TG:1                    | T:0     |                |
| chr28         | 10531787            | 2 | 38 | CA:1                    | C:0     |                |
| chr28         | 10531942            | 2 | 40 | G:1                     | A:0     |                |
| chr28         | 10532071            | 2 | 36 | G:0.611111              |         | A:0.388889     |
| chr28         | 10532897            | 2 | 32 | C:0.59375               |         | T:0.40625      |
| chr28         | 10533054            | 2 | 38 | G:0.526316              |         | C:0.473684     |
| chr28         | 10533354            | 2 | 38 | TAGAGG:1                | T:0     |                |
| chr28         | 10533459            | 2 | 38 | G:0.578947              |         | T:0.421053     |
| chr28         | 10533652            | 2 | 40 | G:1                     | A:0     |                |
| chr28         | 10533958            | 2 | 36 | C:1                     | T:0     |                |
| chr28         | 10534843            | 2 | 36 | G:1                     | A:0     |                |
| chr28         | 10534893            | 2 | 40 | T:1                     | C:0     |                |
| chr28         | 10535021            | 3 | 40 | GA:0.775                | G:0.2   | GAA:0.025      |

|       |                         |    |                    |             |               |
|-------|-------------------------|----|--------------------|-------------|---------------|
| chr28 | 10535315 2              | 40 | AC:1               | A:0         |               |
| chr28 | 10535331 2              | 40 | G:1                | T:0         |               |
| chr28 | 10535811 2              | 36 | C:0.611111         |             | T:0.388889    |
| chr28 | 10535898 2              | 38 | T:1                | G:0         |               |
| chr28 | 10535958 2              | 36 | G:1                | A:0         |               |
| chr28 | 10536054 2              | 38 | C:1                | G:0         |               |
| chr28 | 10536332 2              | 38 | C:1                | CAG:0       |               |
| chr28 | 10536420 2              | 38 | A:0.605263         |             | G:0.394737    |
| chr28 | 10536976 2              | 36 | A:1                | G:0         |               |
| chr28 | 10537452 2              | 40 | C:0.675            | CTGAG:0.325 |               |
| chr28 | 10537507 2              | 40 | T:1                | TTG:0       |               |
| chr28 | 10537895 3              | 36 | CTGTGTGTG:0.166667 |             | C:            |
|       | 0.666667 CTGTG:0.166667 |    |                    |             |               |
| chr28 | 10538001 3              | 36 | T:0.75             | TA:0.25     | TAA:0         |
| chr28 | 10538258 2              | 40 | T:0.675            | C:0.325     |               |
| chr28 | 10538270 2              | 40 | CA:0.7             | C:0.3       |               |
| chr28 | 10538288 2              | 40 | C:1                | T:0         |               |
| chr28 | 10538316 2              | 38 | C:1                | T:0         |               |
| chr28 | 10538331 2              | 38 | A:1                | T:0         |               |
| chr28 | 10538333 2              | 38 | G:1                | A:0         |               |
| chr28 | 10538383 3              | 40 | C:0.55             | CCT:0.05    | CCTCTCTCT:0.4 |
| chr28 | 10538390 3              | 38 | ATC:0.315789       |             | A:0.210526    |
|       | CTC:0.473684            |    |                    |             |               |
| chr28 | 10538436 2              | 40 | A:0.65             | T:0.35      |               |
| chr28 | 10538437 2              | 40 | A:1                | T:0         |               |
| chr28 | 10538626 2              | 36 | C:0.805556         |             | T:0.194444    |
| chr28 | 10538656 2              | 36 | G:0.944444         |             | A:0.055556    |
| chr28 | 10538661 2              | 38 | G:1                | A:0         |               |
| chr28 | 10538951 4              | 40 | TTTTA:0.85         |             | T:0.1         |
|       | TTTTATTTA:0             |    | TTTTATTTATTTA:0.05 |             |               |
| chr28 | 10538997 2              | 40 | CAGAG:0.65         |             | C:0.35        |
| chr28 | 10539277 2              | 40 | G:0.975            | A:0.025     |               |
| chr28 | 10539510 2              | 40 | C:0.975            | T:0.025     |               |
| chr28 | 10539517 2              | 40 | G:0.625            | A:0.375     |               |
| chr28 | 10539547 2              | 40 | C:1                | T:0         |               |
| chr28 | 10539548 2              | 40 | T:0.975            | A:0.025     |               |
| chr28 | 10539557 2              | 40 | G:0.975            | T:0.025     |               |
| chr28 | 10539625 2              | 40 | G:0.65             | C:0.35      |               |
| chr28 | 10539801 2              | 38 | C:1                | T:0         |               |
| chr28 | 10539911 2              | 40 | T:0.6              | C:0.4       |               |
| chr28 | 10540342 2              | 40 | G:0.625            | A:0.375     |               |
| chr28 | 10540382 2              | 40 | T:1                | C:0         |               |
| chr28 | 10540621 2              | 40 | A:1                | G:0         |               |
| chr28 | 10540628 2              | 38 | T:0.605263         |             | A:0.394737    |
| chr28 | 10540871 2              | 40 | T:1                | A:0         |               |
| chr28 | 10540884 2              | 38 | A:0.631579         |             | AT:0.368421   |
| chr28 | 10540929 2              | 32 | C:0.90625          |             | CAG:0.09375   |
| chr28 | 10541015 2              | 34 | CG:1               | C:0         |               |
| chr28 | 10541076 2              | 40 | A:0                | C:1         |               |
| chr28 | 10541096 2              | 40 | T:0                | G:1         |               |
| chr28 | 10541101 2              | 40 | T:0                | A:1         |               |
| chr28 | 10541103 2              | 40 | T:0                | A:1         |               |
| chr28 | 10541118 2              | 40 | T:0                | A:1         |               |
| chr28 | 10541125 2              | 40 | A:0                | C:1         |               |

|               |            |    |                 |              |
|---------------|------------|----|-----------------|--------------|
| chr28         | 10541264 2 | 26 | CCT:0.615385    | C:0.384615   |
| chr28         | 10541327 2 | 28 | T:0.0357143     | TA:0.964286  |
| chr28         | 10541417 2 | 38 | A:1 G:0         |              |
| chr28         | 10541554 2 | 32 | G:1 A:0         |              |
| chr28         | 10541916 2 | 38 | C:1 T:0         |              |
| chr28         | 10541958 2 | 36 | G:0.527778      | A:0.472222   |
| chr28         | 10541965 2 | 36 | C:0.527778      | T:0.472222   |
| chr28         | 10542313 2 | 38 | ACT:0.657895    | A:0.342105   |
| chr28         | 10542400 2 | 38 | C:1 T:0         |              |
| chr28         | 10542690 2 | 36 | CG:0.972222     | C:0.0277778  |
| chr28         | 10542732 2 | 38 | G:1 A:0         |              |
| chr28         | 10543285 2 | 38 | A:1 G:0         |              |
| chr28         | 10544144 2 | 36 | GATTA:1 G:0     |              |
| chr28         | 10544407 2 | 36 | GC:0.555556     | G:0.444444   |
| chr28         | 10544578 2 | 38 | A:1 G:0         |              |
| chr28         | 10544598 2 | 36 | C:1 A:0         |              |
| chr28         | 10544748 2 | 36 | C:0.944444      | T:0.0555556  |
| chr28         | 10544902 2 | 38 | C:0.0263158     | T:0.973684   |
| chr28         | 10544947 2 | 40 | G:1 A:0         |              |
| chr28         | 10545316 2 | 40 | A:0.55 G:0.45   |              |
| chr28         | 10545752 2 | 38 | G:1 A:0         |              |
| chr28         | 10545882 2 | 40 | T:1 C:0         |              |
| chr28         | 10545941 2 | 38 | T:1 C:0         |              |
| chr28         | 10546062 3 | 34 | GC:0.794118     | G:0.147059   |
| GCC:0.0588235 |            |    |                 |              |
| chr28         | 10546246 2 | 40 | G:1 A:0         |              |
| chr28         | 10546274 2 | 38 | AT:1 A:0        |              |
| chr28         | 10546470 2 | 40 | T:0.025 G:0.975 |              |
| chr28         | 10546482 2 | 38 | ATC:1 A:0       |              |
| chr28         | 10546594 2 | 28 | C:1 CCG:0       |              |
| chr28         | 10546605 2 | 28 | C:1 T:0         |              |
| chr28         | 10546670 2 | 38 | A:0.973684      | G:0.0263158  |
| chr28         | 10546749 2 | 38 | G:0.947368      | GT:0.0526316 |
| chr28         | 10546809 3 | 38 | C:1 G:0         | T:0          |
| chr28         | 10546810 2 | 38 | A:1 G:0         |              |
| chr28         | 10547311 2 | 36 | C:1 CG:0        |              |
| chr28         | 10547549 2 | 38 | T:1 C:0         |              |
| chr28         | 10547730 2 | 38 | C:1 T:0         |              |
| chr28         | 10548151 2 | 38 | C:0.368421      | G:0.631579   |
| chr28         | 10548254 2 | 34 | AAG:0.352941    | A:0.647059   |
| chr28         | 10548327 2 | 28 | AAAAGAAAG:0.75  | A:0.25       |
| chr28         | 10548437 2 | 38 | G:0.394737      | GAAGAAAGA:   |
| 0.605263      |            |    |                 |              |
| chr28         | 10548616 2 | 38 | T:1 C:0         |              |
| chr28         | 10548914 2 | 38 | G:1 A:0         |              |
| chr28         | 10550186 2 | 38 | T:0.868421      | C:0.131579   |
| chr28         | 10550235 2 | 38 | C:1 T:0         |              |
| chr28         | 10550733 2 | 30 | TA:0.9 T:0.1    |              |
| chr28         | 10550976 2 | 38 | ATC:1 A:0       |              |
| chr28         | 10551173 2 | 36 | C:0.944444      | G:0.0555556  |
| chr28         | 10551192 2 | 40 | A:1 AT:0        |              |
| chr28         | 10551203 2 | 34 | TA:0.823529     | T:0.176471   |
| chr28         | 10551273 2 | 38 | T:0.815789      | TGA:0.184211 |
| chr28         | 10551427 2 | 36 | G:0.805556      | A:0.194444   |

|       |                      |   |    |                       |                |
|-------|----------------------|---|----|-----------------------|----------------|
| chr28 | 10551575             | 3 | 38 | CTAAA:0.657895        | C:0.0263158    |
|       | CTAAATAAA:0.315789   |   |    |                       |                |
| chr28 | 10551612             | 3 | 38 | T:0.868421            | A:0 TAAAA:     |
|       | 0.131579             |   |    |                       |                |
| chr28 | 10551999             | 2 | 34 | G:0.882353            | A:0.117647     |
| chr28 | 10552082             | 2 | 40 | G:0.925               | C:0.075        |
| chr28 | 10552149             | 2 | 40 | T:1                   | TAATC:0        |
| chr28 | 10552741             | 2 | 40 | CTT:0.9               | C:0.1          |
| chr28 | 10552743             | 2 | 40 | T:0.9                 | TACAC:0.1      |
| chr28 | 10553306             | 2 | 40 | G:1                   | A:0            |
| chr28 | 10553549             | 2 | 40 | G:1                   | C:0            |
| chr28 | 10554159             | 2 | 38 | C:1                   | T:0            |
| chr28 | 10555699             | 4 | 40 | CAG:0.775             | C:0.1 CAGAG:   |
|       | 0.05 CAGAGAGAG:0.075 |   |    |                       |                |
| chr28 | 10556187             | 2 | 38 | CCAGT:0.842105        | C:0.157895     |
| chr28 | 10556286             | 2 | 34 | C:0.617647            | CATAT:0.382353 |
| chr28 | 10556306             | 2 | 26 | TAC:0.923077          | T:0.0769231    |
| chr28 | 10556310             | 2 | 34 | T:0.970588            | TAC:0.0294118  |
| chr28 | 10557662             | 2 | 40 | AAAC:1                | A:0            |
| chr28 | 10559647             | 2 | 38 | CGCCACCAT:0.868421    | C:             |
|       | 0.131579             |   |    |                       |                |
| chr28 | 10560511             | 2 | 36 | T:0.944444            | TA:0.0555556   |
| chr28 | 10561385             | 2 | 40 | G:1                   | A:0            |
| chr28 | 10561624             | 2 | 38 | G:1                   | A:0            |
| chr28 | 10561781             | 2 | 22 | T:0.818182            | TA:0.181818    |
| chr28 | 10561958             | 2 | 16 | GAGGA:0.875           | G:0.125        |
| chr28 | 10562746             | 3 | 36 | CCT:0.694444          | C:0.305556     |
|       | CCTCT:0              |   |    |                       |                |
| chr28 | 10562865             | 2 | 40 | C:0.95                | G:0.05         |
| chr28 | 10563588             | 2 | 36 | C:0.916667            | T:0.0833333    |
| chr28 | 10563736             | 2 | 40 | G:0.9                 | A:0.1          |
| chr28 | 10563944             | 2 | 38 | CCTCT:0.736842        | C:0.263158     |
| chr28 | 10563995             | 2 | 38 | TA:0.894737           | T:0.105263     |
| chr28 | 10563996             | 2 | 40 | A:0.975               | T:0.025        |
| chr28 | 10565183             | 2 | 40 | C:0.95                | T:0.05         |
| chr28 | 10565409             | 2 | 34 | TA:0.617647           | T:0.382353     |
| chr28 | 10565818             | 2 | 40 | T:0.7                 | G:0.3          |
| chr28 | 10566177             | 2 | 38 | GT:0.921053           | G:0.0789474    |
| chr28 | 10566240             | 2 | 40 | GGGAAGAAA:0.925       | G:0.075        |
| chr28 | 10566893             | 2 | 36 | T:0.916667            | C:0.0833333    |
| chr28 | 10567203             | 2 | 38 | G:1                   | T:0            |
| chr28 | 10567759             | 2 | 40 | ACAGGCTAACAACACTG:0.8 | A:0.2          |
| chr28 | 10568250             | 2 | 38 | T:0.815789            | TA:0.184211    |
| chr28 | 10568591             | 2 | 36 | G:1                   | A:0            |
| chr28 | 10568623             | 2 | 40 | A:0.85                | G:0.15         |
| chr28 | 10569503             | 2 | 38 | A:0.894737            | G:0.105263     |
| chr28 | 10569890             | 2 | 38 | A:0.842105            | T:0.157895     |
| chr28 | 10569998             | 2 | 36 | CT:1                  | C:0            |
| chr28 | 10571008             | 2 | 36 | T:0.888889            | C:0.111111     |
| chr28 | 10571845             | 2 | 40 | T:0.85                | C:0.15         |
| chr28 | 10572371             | 2 | 38 | A:0.763158            | T:0.236842     |
| chr28 | 10573035             | 2 | 40 | C:0.9                 | CAAGAA:0.1     |
| chr28 | 10573367             | 2 | 36 | T:0.916667            | C:0.0833333    |
| chr28 | 10573672             | 2 | 38 | C:0.894737            | A:0.105263     |

|                 |          |   |    |                |            |              |
|-----------------|----------|---|----|----------------|------------|--------------|
| chr28           | 10574227 | 2 | 36 | G:1            | A:0        |              |
| chr28           | 10574663 | 2 | 40 | G:0.9          | A:0.1      |              |
| chr28           | 10574717 | 2 | 38 | C:0.894737     |            | G:0.105263   |
| chr28           | 10574739 | 2 | 38 | A:1            | AT:0       |              |
| chr28           | 10574749 | 2 | 38 | A:1            | AT:0       |              |
| chr28           | 10574760 | 2 | 38 | A:1            | AG:0       |              |
| chr28           | 10575007 | 2 | 40 | A:0.85         | G:0.15     |              |
| chr28           | 10575338 | 2 | 34 | C:0.264706     |            | CT:0.735294  |
| chr28           | 10575340 | 2 | 36 | T:0.972222     |            | C:0.0277778  |
| chr28           | 10575737 | 2 | 36 | G:1            | A:0        |              |
| chr28           | 10576071 | 3 | 40 | T:0.45         | A:0.075    | TA:0.475     |
| chr28           | 10576074 | 2 | 40 | A:0.925        | AT:0.075   |              |
| chr28           | 10576100 | 2 | 40 | A:0.975        | T:0.025    |              |
| chr28           | 10576262 | 2 | 34 | C:0.911765     |            | CT:0.0882353 |
| chr28           | 10576306 | 2 | 40 | C:0.95         | CAGAG:0.05 |              |
| chr28           | 10576365 | 2 | 40 | C:1            | T:0        |              |
| chr28           | 10576729 | 2 | 38 | C:0.894737     |            | T:0.105263   |
| chr28           | 10576852 | 2 | 38 | T:0.894737     |            | C:0.105263   |
| chr28           | 10576884 | 2 | 38 | C:0.815789     |            | CA:0.184211  |
| chr28           | 10576892 | 3 | 38 | A:1            | T:0        | AT:0         |
| chr28           | 10576911 | 2 | 38 | AAAAT:1        | A:0        |              |
| chr28           | 10576941 | 2 | 38 | G:1            | A:0        |              |
| chr28           | 10577125 | 2 | 36 | T:0.916667     |            | TA:0.0833333 |
| chr28           | 10577126 | 2 | 36 | T:0.833333     |            | A:0.166667   |
| chr28           | 10577379 | 2 | 34 | G:1            | A:0        |              |
| chr28           | 10577506 | 2 | 32 | TA:0.78125     |            | T:0.21875    |
| chr28           | 10577805 | 3 | 38 | C:0.815789     |            | CCT:0.157895 |
| CCTCT:0.0263158 |          |   |    |                |            |              |
| chr28           | 10577855 | 2 | 40 | AAAATAAAT:0.85 | A:0.15     |              |
| chr28           | 10578996 | 2 | 40 | T:0.9          | TAAC:0.1   |              |
| chr28           | 10579062 | 2 | 40 | AAG:0.85       | A:0.15     |              |
| chr28           | 10580462 | 2 | 32 | C:1            | CT:0       |              |
| chr28           | 10580464 | 2 | 34 | TA:0.882353    |            | T:0.117647   |
| chr28           | 10581386 | 2 | 38 | GA:0.763158    |            | G:0.236842   |
| chr28           | 10581895 | 2 | 36 | C:0.888889     |            | T:0.111111   |
| chr28           | 10581982 | 2 | 40 | A:1            | T:0        |              |
| chr28           | 10582211 | 2 | 40 | T:1            | C:0        |              |
| chr28           | 10582988 | 2 | 40 | C:1            | T:0        |              |
| chr28           | 10583824 | 3 | 38 | CA:0.684211    |            | C:0.131579   |
| CAAA:0.184211   |          |   |    |                |            |              |
| chr28           | 10584077 | 2 | 36 | C:0.861111     |            | A:0.138889   |
| chr28           | 10584152 | 2 | 40 | CCT:0.7        | C:0.3      |              |
| chr28           | 10584919 | 2 | 40 | A:0.9          | G:0.1      |              |
| chr28           | 10585831 | 2 | 40 | AT:0.925       | A:0.075    |              |
| chr28           | 10586056 | 2 | 38 | T:0.710526     |            | A:0.289474   |
| chr28           | 10586531 | 2 | 40 | T:0.875        | C:0.125    |              |
| chr28           | 10586537 | 2 | 40 | G:1            | A:0        |              |
| chr28           | 10587009 | 2 | 38 | A:1            | AAATG:0    |              |
| chr28           | 10588186 | 2 | 36 | C:0.527778     |            | CA:0.472222  |
| chr28           | 10588731 | 2 | 36 | C:0.861111     |            | T:0.138889   |
| chr28           | 10589102 | 2 | 38 | T:0.763158     |            | TA:0.236842  |
| chr28           | 10590953 | 2 | 40 | A:0.875        | G:0.125    |              |
| chr28           | 10591396 | 2 | 40 | G:0.9          | GA:0.1     |              |
| chr28           | 10591455 | 2 | 40 | T:0.95         | A:0.05     |              |

```

chr28  10591516 2    36    TG:0.888889      T:0.111111
chr28  10592814 2    34    TA:0.558824      T:0.441176
chr28  10592845 2    38    A:0.894737      G:0.105263
chr28  10593145 2    38    CA:0.894737     C:0.105263
chr28  10594082 2    40    TA:1      T:0
chr28  10594538 2    34    G:0.882353      GA:0.117647
chr28  10594595 2    40    T:0.85   C:0.15
chr28  10594959 2    38    T:0.605263     G:0.394737
chr28  10595189 2    40    T:0.925  A:0.075
chr28  10595758 3    40    G:0.925  GAATA:0.075
GAATAAATA:0
chr28  10596022 3    30    CTT:0.766667   C:0.1   CT:
0.133333
chr28  10596068 2    40    T:0.875  TAAAG:0.125
chr28  10596279 2    40    CCTCTCTCTCTCT:0.75      C:0.25
chr28  10596340 2    38    TA:1      T:0
chr28  10596511 2    40    T:1      G:0
chr28  10596926 2    40    C:1      T:0
chr28  10596936 2    40    G:1      A:0
chr28  10598903 2    36    A:0.888889     G:0.111111
chr28  10599477 2    34    G:0.941176     A:0.0588235
chr28  10600160 2    38    TTTG:0.921053  T:0.0789474
chr28  10600172 2    40    G:1      T:0
chr28  10600191 2    40    C:1      CAGAG:0
chr28  10600289 2    38    A:0.894737     G:0.105263
chr28  10600456 2    40    AT:0.9   A:0.1
chr28  10600860 2    40    A:0.875  C:0.125
chr28  10601025 2    40    A:0.9    G:0.1
chr28  10601393 2    38    C:1      T:0
chr28  10601547 3    38    TA:0.578947   T:0.315789
AA:0.105263
chr28  10601552 2    38    A:0.947368     T:0.0526316
chr28  10601895 2    36    C:0.833333     T:0.166667
chr28  10602230 2    38    A:0.894737     G:0.105263
chr28  10602417 2    36    A:0.861111     G:0.138889
chr28  10602631 2    34    A:0      T:1
chr28  10602632 2    34    A:0      T:1
chr28  10604178 2    36    A:1      T:0
chr28  10604330 2    38    TA:0.315789    T:0.684211
chr28  10606620 2    38    T:0.842105     A:0.157895
chr28  10607017 2    36    C:0.944444     CCT:0.0555556
chr28  10607070 2    40    T:0.775  TA:0.225
chr28  10607627 2    40    A:0.925  AGGCTCCT:0.075
chr28  10608406 2    36    A:0.555556     AGATT:0.444444
chr28  10609257 2    36    T:1      TA:0
chr28  10609343 2    38    T:1      C:0
chr28  10609455 2    34    G:0.882353     T:0.117647
chr28  10609610 2    38    C:0.842105     T:0.157895
chr28  10610000 2    40
CTTAGGATGTTTCAGTTTCTTTTTTTTTTTTTTTTTTTTTTTTTTTTTTTTTTTTTTTTTTTTTTTTTTTTTTTTTTTT
TT:0      C:1
chr28  10610363 2    34    CT:0.852941    C:0.147059
chr28  10610502 2    34    G:0.852941    A:0.147059
chr28  10610893 2    38    G:1      C:0

```

|       |                     |    |                 |         |                |
|-------|---------------------|----|-----------------|---------|----------------|
| chr28 | 10611159 2          | 40 | T:0.925         | C:0.075 |                |
| chr28 | 10612139 2          | 32 | C:1             | T:0     |                |
| chr28 | 10612291 2          | 22 | T:0.454545      |         | TA:0.545455    |
| chr28 | 10612743 2          | 36 | C:1             | T:0     |                |
| chr28 | 10612925 2          | 38 | A:0.973684      |         | G:0.0263158    |
| chr28 | 10612928 2          | 38 | A:0.947368      |         | G:0.0526316    |
| chr28 | 10613580 2          | 36 | T:0.916667      |         | C:0.0833333    |
| chr28 | 10613752 2          | 36 | CCT:0.833333    |         | C:0.166667     |
| chr28 | 10613808 2          | 40 | AT:0.9          | A:0.1   |                |
| chr28 | 10613812 2          | 40 | T:1             | A:0     |                |
| chr28 | 10614272 2          | 32 | A:1             | C:0     |                |
| chr28 | 10614821 2          | 40 | G:0.9           | T:0.1   |                |
| chr28 | 10615196 3          | 38 | ATT:0.815789    |         | A:0 AT:        |
|       | 0.184211            |    |                 |         |                |
| chr28 | 10615512 2          | 36 | T:0.916667      |         | G:0.0833333    |
| chr28 | 10617162 4          | 40 | GATTTATTT:0.275 |         | G:0.075 GATTT: |
|       | 0.325               |    |                 |         |                |
|       | GATTTATTTATTT:0.325 |    |                 |         |                |
| chr28 | 10617438 2          | 40 | G:1             | A:0     |                |
| chr28 | 10617682 2          | 34 | C:0.882353      |         | CA:0.117647    |
| chr28 | 10617699 2          | 34 | C:0             | T:1     |                |
| chr28 | 10617780 2          | 40 | G:0             | A:1     |                |
| chr28 | 10617826 2          | 38 | G:0             | A:1     |                |
| chr28 | 10617832 2          | 38 | CT:0            | C:1     |                |
| chr28 | 10617839 2          | 38 | T:0             | A:1     |                |
| chr28 | 10617854 2          | 38 | C:0             | A:1     |                |
| chr28 | 10617869 2          | 36 | C:0             | A:1     |                |
| chr28 | 10617903 2          | 40 | T:0             | TA:1    |                |
| chr28 | 10617918 2          | 40 | A:0             | T:1     |                |
| chr28 | 10617919 2          | 40 | T:0             | A:1     |                |
| chr28 | 10617927 2          | 40 | A:0             | AT:1    |                |
| chr28 | 10617929 2          | 40 | A:0             | T:1     |                |
| chr28 | 10617963 2          | 40 | TG:0            | T:1     |                |
| chr28 | 10617977 2          | 40 | GA:0            | G:1     |                |
| chr28 | 10618000 2          | 40 | G:0             | A:1     |                |
| chr28 | 10618010 2          | 40 | A:0             | AC:1    |                |
| chr28 | 10618031 2          | 40 | T:0             | C:1     |                |
| chr28 | 10618032 2          | 40 | T:0             | C:1     |                |
| chr28 | 10618246 2          | 22 | CTA:0.909091    |         | C:0.0909091    |
| chr28 | 10618248 2          | 22 | A:0.0909091     |         | C:0.909091     |
| chr28 | 10618872 2          | 40 | T:1             | G:0     |                |
| chr28 | 10618890 2          | 40 | A:0.9           | G:0.1   |                |
| chr28 | 10619117 2          | 40 | A:1             | T:0     |                |
| chr28 | 10619145 3          | 40 | CAGAGAG:0.825   |         | C:0.05 CAG:    |
|       | 0.125               |    |                 |         |                |
| chr28 | 10619482 2          | 36 | A:0.833333      |         | G:0.166667     |
| chr28 | 10619486 2          | 36 | C:0.833333      |         | CAG:0.166667   |
| chr28 | 10619721 2          | 40 | GTGGC:0.825     |         | G:0.175        |
| chr28 | 10619871 2          | 34 | GCT:0.970588    |         | G:0.0294118    |
| chr28 | 10621164 2          | 38 | G:0.263158      |         | T:0.736842     |
| chr28 | 10621953 2          | 32 | C:0.25          | T:0.75  |                |
| chr28 | 10621964 2          | 34 | A:0.323529      |         | G:0.676471     |
| chr28 | 10622622 2          | 38 | GC:0.526316     |         | G:0.473684     |
| chr28 | 10622643 2          | 38 | G:0.526316      |         | GTGA:0.473684  |
| chr28 | 10622647 2          | 38 | TAGG:0.526316   |         | T:0.473684     |

|             |          |                |    |                               |             |
|-------------|----------|----------------|----|-------------------------------|-------------|
| chr28       | 10622771 | 2              | 40 | T:0.95                        | TAAA:0.05   |
| chr28       | 10622878 | 2              | 40 | G:0.775                       | A:0.225     |
| chr28       | 10622883 | 2              | 40 | T:0.775                       | C:0.225     |
| chr28       | 10622935 | 2              | 40 | T:0.75                        | G:0.25      |
| chr28       | 10623376 | 2              | 40 | C:1                           | T:0         |
| chr28       | 10624357 | 2              | 34 | G:0.823529                    | T:0.176471  |
| chr28       | 10624425 | 2              | 40 | C:0.925                       | A:0.075     |
| chr28       | 10625989 | 2              | 38 | T:0.684211                    | A:0.315789  |
| chr28       | 10626000 | 2              | 36 | T:0.722222                    | C:0.277778  |
| chr28       | 10626353 | 2              | 40 | A:0.95                        | T:0.05      |
| chr28       | 10626516 | 2              | 38 | A:0.684211                    | G:0.315789  |
| chr28       | 10627065 | 2              | 34 | T:1                           | C:0         |
| chr28       | 10627402 | 2              | 38 | A:0.236842                    | G:0.763158  |
| chr28       | 10627470 | 2              | 38 | A:0.815789                    | G:0.184211  |
| chr28       | 10627479 | 2              | 38 | A:0.815789                    | C:0.184211  |
| chr28       | 10627673 | 2              | 40 | A:0.75                        | G:0.25      |
| chr28       | 10627837 | 2              | 40 | G:0.25                        | A:0.75      |
| chr28       | 10628053 | 4              | 38 | TAA:0.236842                  | T:0.157895  |
| TA:0.526316 |          | TAAA:0.0789474 |    |                               |             |
| chr28       | 10628054 | 2              | 38 | A:1                           | C:0         |
| chr28       | 10628554 | 2              | 38 | T:0.289474                    | C:0.710526  |
| chr28       | 10628556 | 2              | 38 | C:0.289474                    | G:0.710526  |
| chr28       | 10628630 | 2              | 36 | A:1                           | G:0         |
| chr28       | 10628686 | 2              | 34 | C:0.235294                    | T:0.764706  |
| chr28       | 10629369 | 2              | 40 | A:0.725                       | G:0.275     |
| chr28       | 10629607 | 2              | 40 | C:1                           | T:0         |
| chr28       | 10629969 | 2              | 40 | GGAGAGAGAGAGAGAGA:0.725       | G:0.275     |
| chr28       | 10630008 | 2              | 40 | CAGAGA:0.725                  | C:0.275     |
| chr28       | 10630016 | 2              | 40 | C:0.725                       | CT:0.275    |
| chr28       | 10630026 | 2              | 40 | GAGAAGCAGGCTCCATGCAGGGA:0.725 |             |
| G:0.275     |          |                |    |                               |             |
| chr28       | 10630251 | 2              | 38 | T:0.842105                    | C:0.157895  |
| chr28       | 10630452 | 2              | 38 | G:0.947368                    | T:0.0526316 |
| chr28       | 10630515 | 2              | 36 | C:0.25                        | T:0.75      |
| chr28       | 10630780 | 2              | 40 | T:0.25                        | G:0.75      |
| chr28       | 10630830 | 2              | 36 | A:0.805556                    | AT:0.194444 |
| chr28       | 10630953 | 2              | 36 | G:0.833333                    | T:0.166667  |
| chr28       | 10630963 | 2              | 36 | C:0.972222                    | T:0.0277778 |
| chr28       | 10631066 | 2              | 40 | T:0                           | C:1         |
| chr28       | 10631096 | 2              | 38 | C:0                           | T:1         |
| chr28       | 10631098 | 2              | 38 | G:0                           | T:1         |
| chr28       | 10631733 | 2              | 38 | T:0                           | C:1         |
| chr28       | 10631854 | 2              | 38 | C:0.105263                    | A:0.894737  |
| chr28       | 10632105 | 2              | 36 | A:0.277778                    | G:0.722222  |
| chr28       | 10632233 | 2              | 40 | T:0.975                       | G:0.025     |
| chr28       | 10632242 | 2              | 40 | A:0.25                        | G:0.75      |
| chr28       | 10632248 | 2              | 40 | T:1                           | C:0         |
| chr28       | 10632600 | 2              | 40 | T:1                           | C:0         |
| chr28       | 10632617 | 2              | 38 | A:0.789474                    | G:0.210526  |
| chr28       | 10632699 | 2              | 40 | T:0.775                       | C:0.225     |
| chr28       | 10632728 | 2              | 38 | G:0.921053                    | C:0.0789474 |
| chr28       | 10632911 | 2              | 34 | AT:0.617647                   | A:0.382353  |
| chr28       | 10633163 | 2              | 36 | G:0                           | C:1         |
| chr28       | 10633165 | 2              | 36 | C:0                           | A:1         |



|       |          |   |    |                      |                 |                |  |
|-------|----------|---|----|----------------------|-----------------|----------------|--|
| chr28 | 10633202 | 2 | 38 | ATGTC:1              | A:0             |                |  |
| chr28 | 10633728 | 2 | 38 | A:0.894737           |                 | AT:0.105263    |  |
| chr28 | 10633784 | 2 | 36 | A:0.861111           |                 | G:0.138889     |  |
| chr28 | 10633815 | 2 | 36 | A:0.888889           |                 | T:0.111111     |  |
| chr28 | 10633825 | 2 | 36 | G:0.888889           |                 | C:0.111111     |  |
| chr28 | 10633919 | 2 | 38 | T:0.105263           |                 | A:0.894737     |  |
| chr28 | 10633945 | 2 | 38 | TA:0.894737          |                 | T:0.105263     |  |
| chr28 | 10634021 | 2 | 36 | C:0.888889           |                 | CTCCA:0.111111 |  |
| chr28 | 10634257 | 2 | 40 | TTAAAAAAAAAAAAA:0.95 |                 | T:0.05         |  |
| chr28 | 10634258 | 3 | 40 | TAAAAAAAAA:0.975     | TAAAA:0         | T:0.025        |  |
| chr28 | 10634262 | 2 | 40 | AAAAAAAAAT:1         | A:0             |                |  |
| chr28 | 10634264 | 2 | 40 | A:0.725              | AATATATTC:0.275 |                |  |
| chr28 | 10634266 | 3 | 40 | A:0.725              | T:0.275         | AAAAT:0        |  |
| chr28 | 10634268 | 2 | 40 | A:0.725              | T:0.275         |                |  |
| chr28 | 10634269 | 2 | 38 | AT:1                 | A:0             |                |  |
| chr28 | 10634270 | 3 | 40 | T:0.725              | TTC:0.225       | TTCAA:         |  |
|       |          |   |    | 0.05                 |                 |                |  |
| chr28 | 10634271 | 2 | 40 | AAATAAAT:1           | A:0             |                |  |
| chr28 | 10634272 | 3 | 40 | AAT:0.775            | TAT:0           | A:0.225        |  |
| chr28 | 10634274 | 2 | 38 | TAAA:1               | T:0             |                |  |
| chr28 | 10634279 | 2 | 38 | A:1                  | C:0             |                |  |
| chr28 | 10634281 | 2 | 38 | ATAAAT:1             | A:0             |                |  |
| chr28 | 10634487 | 2 | 38 | A:0.263158           |                 | G:0.736842     |  |
| chr28 | 10634607 | 2 | 36 | AAAG:1               | A:0             |                |  |
| chr28 | 10634747 | 2 | 40 | C:0.275              | CA:0.725        |                |  |
| chr28 | 10634817 | 2 | 38 | G:0.157895           |                 | C:0.842105     |  |
| chr28 | 10634840 | 2 | 36 | T:0.194444           |                 | C:0.805556     |  |
| chr28 | 10635490 | 2 | 24 | C:0.916667           |                 | A:0.0833333    |  |
| chr28 | 10636541 | 2 | 32 | T:0.03125            |                 | G:0.96875      |  |
| chr28 | 10636814 | 2 | 36 | C:0.944444           |                 | CCT:0.0555556  |  |
| chr28 | 10637002 | 2 | 38 | A:0.105263           |                 | G:0.894737     |  |
| chr28 | 10637235 | 2 | 38 | TG:0.894737          |                 | T:0.105263     |  |
| chr28 | 10637237 | 2 | 38 | G:1                  | T:0             |                |  |
| chr28 | 10638364 | 2 | 40 | G:0.95               | GT:0.05         |                |  |
| chr28 | 10638365 | 2 | 40 | G:0.95               | T:0.05          |                |  |
| chr28 | 10638401 | 2 | 40 | G:0.85               | A:0.15          |                |  |
| chr28 | 10638429 | 2 | 40 | C:0.95               | T:0.05          |                |  |
| chr28 | 10638694 | 2 | 38 | G:0.921053           |                 | A:0.0789474    |  |
| chr28 | 10638697 | 2 | 38 | T:0.973684           |                 | C:0.0263158    |  |
| chr28 | 10638806 | 2 | 36 | T:0.777778           |                 | C:0.222222     |  |
| chr28 | 10638899 | 2 | 38 | T:0.710526           |                 | A:0.289474     |  |
| chr28 | 10639109 | 2 | 38 | A:1                  | G:0             |                |  |
| chr28 | 10639164 | 2 | 40 | T:0.05               | C:0.95          |                |  |
| chr28 | 10639509 | 2 | 40 | GT:1                 | G:0             |                |  |
| chr28 | 10639510 | 3 | 40 | T:0.95               | TGG:0.05        | TGGG:0         |  |
| chr28 | 10639511 | 2 | 40 | GT:0.875             | G:0.125         |                |  |
| chr28 | 10639512 | 2 | 40 | T:0.875              | G:0.125         |                |  |
| chr28 | 10639567 | 3 | 38 | G:0.736842           |                 | GA:0.210526    |  |
|       |          |   |    | GAA:0.0526316        |                 |                |  |
| chr28 | 10639837 | 2 | 38 | C:0.210526           |                 | T:0.789474     |  |
| chr28 | 10639951 | 3 | 38 | C:0.473684           |                 | CCT:0.342105   |  |
|       |          |   |    | CCTCTCT:0.184211     |                 |                |  |
| chr28 | 10640000 | 2 | 36 | AT:0.916667          |                 | A:0.0833333    |  |
| chr28 | 10640010 | 2 | 36 | A:0.777778           |                 | T:0.222222     |  |

|          |            |                           |                           |                |
|----------|------------|---------------------------|---------------------------|----------------|
| chr28    | 10640011 2 | 36                        | T:0.777778                | A:0.222222     |
| chr28    | 10640012 2 | 36                        | A:0.916667                | T:0.0833333    |
| chr28    | 10640013 2 | 36                        | A:0.916667                | T:0.0833333    |
| chr28    | 10640083 2 | 40                        | G:0 C:1                   |                |
| chr28    | 10640091 2 | 40                        | G:0 C:1                   |                |
| chr28    | 10640200 2 | 40                        | T:0.925 A:0.075           |                |
| chr28    | 10640201 2 | 40                        | T:0.8 A:0.2               |                |
| chr28    | 10640230 2 | 38                        | C:0.868421                | CAG:0.131579   |
| chr28    | 10640250 2 | 38                        | G:0.210526                | GA:0.789474    |
| chr28    | 10640251 2 | 38                        | G:0.210526                | GA:0.789474    |
| chr28    | 10640316 2 | 38                        | C:0.0526316               | G:0.947368     |
| chr28    | 10640330 2 | 40                        | C:1 T:0                   |                |
| chr28    | 10640350 2 | 38                        | C:0.184211                | T:0.815789     |
| chr28    | 10640363 2 | 38                        | C:1 T:0                   |                |
| chr28    | 10640400 2 | 38                        | G:0.131579                | GA:0.868421    |
| chr28    | 10640523 3 | 40                        | CTTT:0 C:0.95             | CTT:0.05       |
| chr28    | 10640567 2 | 40                        | T:0.275 A:0.725           |                |
| chr28    | 10640568 2 | 40                        | A:0.975 T:0.025           |                |
| chr28    | 10640569 2 | 40                        | A:0.975 T:0.025           |                |
| chr28    | 10641158 2 | 36                        | A:0.972222                | C:0.0277778    |
| chr28    | 10641161 2 | 36                        | GA:0 G:1                  |                |
| chr28    | 10641648 2 | 38                        | T:0.263158                | G:0.736842     |
| chr28    | 10642984 2 | 38                        | G:0.289474                | A:0.710526     |
| chr28    | 10643363 2 | 30                        | C:0.0666667               | G:0.933333     |
| chr28    | 10643973 2 | 40                        | T:0.65 C:0.35             |                |
| chr28    | 10644364 2 | 36                        | C:0.777778                | T:0.222222     |
| chr28    | 10644502 2 | 36                        | T:0.805556                | C:0.194444     |
| chr28    | 10644704 2 | 38                        | G:0.789474                | A:0.210526     |
| chr28    | 10644856 2 | 38                        | C:0.763158                | CCTCT:0.236842 |
| chr28    | 10644871 2 | 38                        | CTGTG:0.973684            | C:0.0263158    |
| chr28    | 10644873 2 | 38                        | G:0.763158                | C:0.236842     |
| chr28    | 10644911 2 | 38                        | TAAAA:0.289474            | T:0.710526     |
| chr28    | 10644941 2 | 40                        | T:0.05 C:0.95             |                |
| chr28    | 10645306 2 | 34                        | T:0.764706                | G:0.235294     |
| chr28    | 10645376 2 | 38                        | C:0.921053                | T:0.0789474    |
| chr28    | 10645404 2 | 40                        | G:0.725 C:0.275           |                |
| chr28    | 10645750 2 | 30                        | C:0.9 T:0.1               |                |
| chr28    | 10645875 2 | 40                        | A:0.925 AT:0.075          |                |
| chr28    | 10645877 2 | 38                        | A:0.710526                | T:0.289474     |
| chr28    | 10645886 2 | 40                        | AAAAATAAAAT:0.95          | A:0.05         |
| chr28    | 10645933 2 | 40                        | A:0.925 T:0.075           |                |
| chr28    | 10646181 2 | 40                        | C:0.975 T:0.025           |                |
| chr28    | 10646700 2 | 40                        | C:0.7 A:0.3               |                |
| chr28    | 10646902 2 | 38                        | G:0.842105                | A:0.157895     |
| chr28    | 10646921 2 | 38                        | T:0.947368                | C:0.0526316    |
| chr28    | 10646983 2 | 38                        | G:0.789474                | C:0.210526     |
| chr28    | 10647487 2 | 40                        | G:0.275 GT:0.725          |                |
| chr28    | 10647679 2 | 36                        | C:0.805556                | T:0.194444     |
| chr28    | 10647999 2 | 38                        | G:1 A:0                   |                |
| chr28    | 10648322 4 | 18                        | TGGCGGCGGCGGCGGC:0.444444 | T:             |
| 0.388889 | TGGCGGC:0  | TGGCGGCGGCGGCGGC:0.166667 |                           |                |
| chr28    | 10648328 2 | 16                        | C:1 T:0                   |                |
| chr28    | 10648331 2 | 16                        | C:0.8125 T:0.1875         |                |
| chr28    | 10648334 2 | 16                        | C:1 T:0                   |                |

|       |                 |    |                              |                    |           |
|-------|-----------------|----|------------------------------|--------------------|-----------|
| chr28 | 10648337 2      | 12 | C:0.75                       | T:0.25             |           |
| chr28 | 10650449 2      | 38 | GAC:0.815789                 | G:0.184211         |           |
| chr28 | 10650524 2      | 38 | G:1                          | A:0                |           |
| chr28 | 10651103 2      | 34 | GT:0.617647                  | G:0.382353         |           |
| chr28 | 10651360 2      | 40 | T:0.95                       | TTTGATGCGTCTG:0.05 |           |
| chr28 | 10653423 3      | 34 | TTC:0.823529                 | T:0.147059         |           |
|       | TTCTC:0.0294118 |    |                              |                    |           |
| chr28 | 10654846 2      | 38 | C:1                          | CCTCT:0            |           |
| chr28 | 10654982 2      | 40 | C:0.825                      | T:0.175            |           |
| chr28 | 10655254 2      | 40 | C:1                          | A:0                |           |
| chr28 | 10658845 2      | 38 | G:1                          | A:0                |           |
| chr28 | 10660157 2      | 32 | G:0.5625                     | GT:0.4375          |           |
| chr28 | 10660205 2      | 40 | A:0.925                      | G:0.075            |           |
| chr28 | 10660330 2      | 38 | C:0.868421                   | T:0.131579         |           |
| chr28 | 10660506 2      | 38 | G:0.842105                   | GTC:0.157895       |           |
| chr28 | 10660516 3      | 38 | C:1                          | G:0                | CTG:0     |
| chr28 | 10660985 2      | 38 | TA:1                         | T:0                |           |
| chr28 | 10661219 2      | 34 | C:0.735294                   | CT:0.264706        |           |
| chr28 | 10663314 3      | 40 | CT:0.7                       | C:0.125            | CTT:0.175 |
| chr28 | 10664419 2      | 38 | C:0.947368                   | CT:0.0526316       |           |
| chr28 | 10664431 2      | 40 | A:0.85                       | AT:0.15            |           |
| chr28 | 10664460 2      | 38 | C:0.763158                   | CAG:0.236842       |           |
| chr28 | 10664886 2      | 40 | C:0.7                        | T:0.3              |           |
| chr28 | 10666011 2      | 40 | A:0.975                      | T:0.025            |           |
| chr28 | 10667082 2      | 40 | G:1                          | A:0                |           |
| chr28 | 10668639 3      | 32 | GAAA:0.3125                  | G:0.25             | GA:       |
|       | 0.4375          |    |                              |                    |           |
| chr28 | 10668690 2      | 28 | TC:0.142857                  | T:0.857143         |           |
| chr28 | 10670738 2      | 38 | C:0.973684                   | T:0.0263158        |           |
| chr28 | 10673042 2      | 40 | T:1                          | G:0                |           |
| chr28 | 10674395 2      | 40 | C:1                          | T:0                |           |
| chr28 | 10674646 2      | 38 | G:1                          | A:0                |           |
| chr28 | 10675012 2      | 34 | A:0.970588                   | G:0.0294118        |           |
| chr28 | 10675344 2      | 38 | G:1                          | A:0                |           |
| chr28 | 10675556 2      | 40 | T:1                          | C:0                |           |
| chr28 | 10676284 2      | 38 | A:0.736842                   | G:0.263158         |           |
| chr28 | 10676356 2      | 40 | C:1                          | A:0                |           |
| chr28 | 10676947 2      | 40 | TCTGTTTTGCC:0.975            | T:0.025            |           |
| chr28 | 10677728 2      | 32 | C:1                          | T:0                |           |
| chr28 | 10677902 2      | 40 | T:0.775                      | C:0.225            |           |
| chr28 | 10682717 2      | 36 | A:1                          | AC:0               |           |
| chr28 | 10685522 2      | 38 | C:0.815789                   | T:0.184211         |           |
| chr28 | 10686538 2      | 36 | G:1                          | A:0                |           |
| chr28 | 10689002 2      | 38 | CTATCATT:0                   | C:1                |           |
| chr28 | 10689011 2      | 38 | CAACACCAGAAATACTTGACAAGCTT:0 |                    |           |
|       | C:1             |    |                              |                    |           |
| chr28 | 10689041 2      | 38 | CAAAG:0                      | C:1                |           |
| chr28 | 10689052 2      | 38 | TGTAGTCTGTCTAC:0             | T:1                |           |
| chr28 | 10689067 2      | 38 | AAATTTCTGACATCAG:0           | A:1                |           |
| chr28 | 10689084 2      | 38 | CCCAAAGGAGAA:0               | C:1                |           |
| chr28 | 10689096 2      | 38 | T:0                          | TTG:1              |           |
| chr28 | 10690263 2      | 36 | C:1                          | T:0                |           |
| chr28 | 10690732 2      | 38 | T:0.921053                   | A:0.0789474        |           |
| chr28 | 10691590 2      | 38 | C:1                          | A:0                |           |

|              |          |   |    |                      |             |                |
|--------------|----------|---|----|----------------------|-------------|----------------|
| chr28        | 10692902 | 2 | 40 | A:0.8                | G:0.2       |                |
| chr28        | 10692987 | 2 | 38 | T:0.789474           |             | C:0.210526     |
| chr28        | 10693211 | 2 | 34 | G:0.558824           |             | GA:0.441176    |
| chr28        | 10694061 | 2 | 40 | T:0.825              | C:0.175     |                |
| chr28        | 10694176 | 2 | 40 | G:0.9                | A:0.1       |                |
| chr28        | 10694780 | 2 | 36 | T:0.777778           |             | C:0.222222     |
| chr28        | 10694786 | 2 | 36 | C:1                  | T:0         |                |
| chr28        | 10696593 | 2 | 40 | G:0.825              | A:0.175     |                |
| chr28        | 10696929 | 2 | 40 | T:1                  | C:0         |                |
| chr28        | 10696974 | 2 | 40 | C:1                  | T:0         |                |
| chr28        | 10697088 | 2 | 40 | C:1                  | T:0         |                |
| chr28        | 10698154 | 2 | 36 | G:0.777778           |             | A:0.222222     |
| chr28        | 10698493 | 2 | 34 | C:0.323529           |             | CT:0.676471    |
| chr28        | 10699540 | 2 | 40 | CCTCT:0.975          |             | C:0.025        |
| chr28        | 10699735 | 2 | 40 | A:0.825              | G:0.175     |                |
| chr28        | 10699869 | 2 | 38 | T:0.710526           |             | C:0.289474     |
| chr28        | 10700188 | 2 | 36 | T:0.805556           |             | A:0.194444     |
| chr28        | 10700658 | 2 | 36 | G:0.805556           |             | T:0.194444     |
| chr28        | 10701197 | 2 | 36 | AG:0.805556          |             | A:0.194444     |
| chr28        | 10701214 | 2 | 38 | A:0.815789           |             | G:0.184211     |
| chr28        | 10701258 | 2 | 38 | A:1                  | G:0         |                |
| chr28        | 10701341 | 2 | 36 | T:0.833333           |             | A:0.166667     |
| chr28        | 10701625 | 2 | 40 | A:0.85               | G:0.15      |                |
| chr28        | 10702509 | 2 | 38 | CTTTCTTTTCT:0.842105 |             | C:<br>0.157895 |
| chr28        | 10702592 | 2 | 38 | G:0.868421           |             | GACAC:0.131579 |
| chr28        | 10702654 | 2 | 34 | T:0.823529           |             | C:0.176471     |
| chr28        | 10703393 | 2 | 40 | A:0.85               | G:0.15      |                |
| chr28        | 10703679 | 2 | 34 | C:1                  | T:0         |                |
| chr28        | 10703918 | 2 | 38 | C:1                  | T:0         |                |
| chr28        | 10704612 | 2 | 40 | CT:0.775             | C:0.225     |                |
| chr28        | 10705081 | 2 | 40 | G:0.75               | A:0.25      |                |
| chr28        | 10705509 | 2 | 38 | A:0.763158           |             | T:0.236842     |
| chr28        | 10705881 | 2 | 38 | T:0.868421           |             | TA:0.131579    |
| chr28        | 10706231 | 2 | 40 | A:0.8                | AT:0.2      |                |
| chr28        | 10706893 | 2 | 40 | C:0.725              | T:0.275     |                |
| chr28        | 10707391 | 2 | 40 | C:0.725              | CAGAG:0.275 |                |
| chr28        | 10707514 | 2 | 34 | T:0.735294           |             | C:0.264706     |
| chr28        | 10707996 | 2 | 38 | G:0.815789           |             | C:0.184211     |
| chr28        | 10708030 | 2 | 34 | G:0.764706           |             | GA:0.235294    |
| chr28        | 10708233 | 2 | 38 | C:0.815789           |             | T:0.184211     |
| chr28        | 10708260 | 2 | 38 | T:0.815789           |             | G:0.184211     |
| chr28        | 10708964 | 2 | 40 | A:0.775              | G:0.225     |                |
| chr28        | 10709326 | 2 | 38 | A:0.842105           |             | G:0.157895     |
| chr28        | 10709441 | 2 | 38 | C:0.815789           |             | T:0.184211     |
| chr28        | 10710218 | 2 | 24 | ATT:0.791667         |             | A:0.208333     |
| chr28        | 10710293 | 2 | 38 | A:0.789474           |             | T:0.210526     |
| chr28        | 10710621 | 2 | 36 | A:0                  | G:1         |                |
| chr28        | 10710791 | 2 | 34 | GAC:0.882353         |             | G:0.117647     |
| chr28        | 10711014 | 2 | 38 | T:0.842105           |             | C:0.157895     |
| chr28        | 10711234 | 3 | 36 | AT:0.777778          |             | A:0.0555556    |
| ATT:0.166667 |          |   |    |                      |             |                |
| chr28        | 10711887 | 2 | 38 | C:0.684211           |             | T:0.315789     |
| chr28        | 10712016 | 2 | 40 | T:0.775              | C:0.225     |                |

|                |          |   |    |                   |              |
|----------------|----------|---|----|-------------------|--------------|
| chr28          | 10712106 | 2 | 38 | T:0.973684        | G:0.0263158  |
| chr28          | 10712617 | 2 | 38 | AT:0.0263158      | A:0.973684   |
| chr28          | 10712647 | 2 | 32 | C:0.75            | CAG:0.25     |
| chr28          | 10713398 | 2 | 34 | G:0.735294        | A:0.264706   |
| chr28          | 10713453 | 2 | 32 | A:1               | G:0          |
| chr28          | 10713526 | 2 | 36 | G:1               | C:0          |
| chr28          | 10713788 | 2 | 38 | ATCACC:0.842105   | A:0.157895   |
| chr28          | 10713889 | 2 | 40 | T:0.825           | A:0.175      |
| chr28          | 10714028 | 2 | 40 | T:0.925           | C:0.075      |
| chr28          | 10714302 | 2 | 40 | T:0.8             | G:0.2        |
| chr28          | 10714438 | 2 | 38 | C:0.815789        | T:0.184211   |
| chr28          | 10715462 | 2 | 38 | C:0.842105        | A:0.157895   |
| chr28          | 10716192 | 2 | 26 | C:0.692308        | CT:0.307692  |
| chr28          | 10716452 | 2 | 28 | T:0.785714        | C:0.214286   |
| chr28          | 10716626 | 3 | 34 | T:0.705882        | TA:0.264706  |
| TAA:0.0294118  |          |   |    |                   |              |
| chr28          | 10717050 | 2 | 40 | G:0.975           | A:0.025      |
| chr28          | 10717141 | 2 | 38 | C:1               | A:0          |
| chr28          | 10717190 | 3 | 38 | GA:0.684211       | G:0.131579   |
| GAA:0.184211   |          |   |    |                   |              |
| chr28          | 10717334 | 2 | 38 | C:0.763158        | G:0.236842   |
| chr28          | 10717644 | 2 | 40 | T:0               | G:1          |
| chr28          | 10717691 | 2 | 40 | A:0.925           | G:0.075      |
| chr28          | 10717743 | 2 | 34 | TA:0.823529       | T:0.176471   |
| chr28          | 10717873 | 2 | 38 | T:0.815789        | C:0.184211   |
| chr28          | 10719409 | 2 | 40 | G:0.85            | A:0.15       |
| chr28          | 10719846 | 2 | 34 | G:0.970588        | T:0.0294118  |
| chr28          | 10719852 | 2 | 34 | TC:0.735294       | T:0.264706   |
| chr28          | 10719870 | 2 | 34 | A:0.823529        | C:0.176471   |
| chr28          | 10721042 | 2 | 38 | T:0.842105        | C:0.157895   |
| chr28          | 10721098 | 2 | 40 | T:1               | C:0          |
| chr28          | 10722029 | 2 | 40 | AAGC:1            | A:0          |
| chr28          | 10722105 | 2 | 38 | C:0.815789        | CTT:0.184211 |
| chr28          | 10722278 | 2 | 38 | A:0.763158        | G:0.236842   |
| chr28          | 10722378 | 2 | 40 | T:0.825           | G:0.175      |
| chr28          | 10722820 | 2 | 40 | G:0.775           | T:0.225      |
| chr28          | 10723336 | 2 | 38 | A:0.789474        | T:0.210526   |
| chr28          | 10723380 | 2 | 38 | G:0.789474        | A:0.210526   |
| chr28          | 10723459 | 2 | 26 | ATT:0.923077      | A:0.0769231  |
| chr28          | 10723462 | 2 | 26 | T:1               | TA:0         |
| chr28          | 10723470 | 2 | 26 | T:1               | A:0          |
| chr28          | 10723992 | 2 | 40 | CCTCTCT:0.8       | C:0.2        |
| chr28          | 10724046 | 2 | 40 | AG:0.875          | A:0.125      |
| chr28          | 10724099 | 2 | 40 | A:0.7             | G:0.3        |
| chr28          | 10724369 | 2 | 40 | A:0.8             | C:0.2        |
| chr28          | 10724901 | 2 | 40 | A:0.775           | G:0.225      |
| chr28          | 10725057 | 2 | 38 | CT:0.710526       | C:0.289474   |
| chr28          | 10725067 | 2 | 34 | TTTTTTTC:0.941176 | T:           |
| 0.0588235      |          |   |    |                   |              |
| chr28          | 10725068 | 2 | 34 | TTTTTTTC:0.764706 | T:           |
| 0.235294       |          |   |    |                   |              |
| chr28          | 10725642 | 3 | 34 | CTTT:0.705882     | C:0.0882353  |
| CTTTT:0.205882 |          |   |    |                   |              |
| chr28          | 10725688 | 2 | 36 | CAG:0.805556      | C:0.194444   |

|                |          |   |    |                  |              |                 |
|----------------|----------|---|----|------------------|--------------|-----------------|
| chr28          | 10725754 | 2 | 38 | G:1              | A:0          |                 |
| chr28          | 10726592 | 2 | 38 | T:0.789474       |              | C:0.210526      |
| chr28          | 10727319 | 2 | 34 | CA:0.794118      |              | C:0.205882      |
| chr28          | 10727335 | 2 | 32 | G:0.75           | GTA:0.25     |                 |
| chr28          | 10727645 | 2 | 38 | C:0.763158       |              | A:0.236842      |
| chr28          | 10728488 | 2 | 36 | G:0.805556       |              | A:0.194444      |
| chr28          | 10728500 | 2 | 32 | GT:0.8125        |              | G:0.1875        |
| chr28          | 10730049 | 2 | 36 | C:0.861111       |              | T:0.138889      |
| chr28          | 10730584 | 2 | 38 | A:0.815789       |              | C:0.184211      |
| chr28          | 10731280 | 2 | 40 | T:0.8            | C:0.2        |                 |
| chr28          | 10731398 | 2 | 38 | A:0.868421       |              | G:0.131579      |
| chr28          | 10732073 | 2 | 40 | C:0.8            | T:0.2        |                 |
| chr28          | 10732241 | 2 | 38 | T:0.763158       |              | TAAATC:0.236842 |
| chr28          | 10732717 | 2 | 38 | G:0.736842       |              | GA:0.263158     |
| chr28          | 10733060 | 2 | 40 | A:0.275          | T:0.725      |                 |
| chr28          | 10733105 | 2 | 40 | A:0.775          | G:0.225      |                 |
| chr28          | 10733286 | 2 | 32 | A:0.90625        |              | G:0.09375       |
| chr28          | 10733508 | 2 | 38 | C:0.842105       |              | T:0.157895      |
| chr28          | 10733562 | 2 | 32 | CTT:0.6875       |              | C:0.3125        |
| chr28          | 10733613 | 2 | 24 | C:0.916667       |              | CAG:0.0833333   |
| chr28          | 10733971 | 2 | 32 | AT:0.875         | A:0.125      |                 |
| chr28          | 10733972 | 2 | 32 | T:0.9375         | A:0.0625     |                 |
| chr28          | 10733977 | 2 | 32 | A:0.8125         | T:0.1875     |                 |
| chr28          | 10734120 | 2 | 34 | A:0.823529       |              | G:0.176471      |
| chr28          | 10734164 | 2 | 30 | A:0.9            | G:0.1        |                 |
| chr28          | 10734177 | 2 | 36 | T:0.777778       |              | TA:0.222222     |
| chr28          | 10734403 | 2 | 36 | AAAGGC:1         | A:0          |                 |
| chr28          | 10734434 | 2 | 34 | G:1              | A:0          |                 |
| chr28          | 10734596 | 2 | 34 | G:0.735294       |              | A:0.264706      |
| chr28          | 10735011 | 2 | 40 | T:0.85           | C:0.15       |                 |
| chr28          | 10735131 | 2 | 40 | G:0.75           | A:0.25       |                 |
| chr28          | 10735165 | 2 | 40 | CT:0.7           | C:0.3        |                 |
| chr28          | 10735204 | 3 | 40 | C:0.9            | CAG:0        | CAGAG:0.1       |
| chr28          | 10735206 | 3 | 40 | C:0.85           | G:0.15       | CAGAG:0         |
| chr28          | 10735781 | 2 | 40 | A:0.975          | T:0.025      |                 |
| chr28          | 10736087 | 2 | 38 | C:1              | T:0          |                 |
| chr28          | 10737303 | 2 | 40 | G:1              | C:0          |                 |
| chr28          | 10737520 | 2 | 38 | A:0.842105       |              | G:0.157895      |
| chr28          | 10739199 | 2 | 34 | G:0.941176       |              | A:0.0588235     |
| chr28          | 10739353 | 2 | 38 | G:0.947368       |              | A:0.0526316     |
| chr28          | 10739553 | 3 | 38 | AG:0.789474      |              | A:0.0526316     |
| AGG:0.157895   |          |   |    |                  |              |                 |
| chr28          | 10739597 | 2 | 38 | C:0.789474       |              | T:0.210526      |
| chr28          | 10740077 | 2 | 38 | C:0.947368       |              | T:0.0526316     |
| chr28          | 10740145 | 2 | 34 | C:0.735294       |              | CA:0.264706     |
| chr28          | 10740147 | 2 | 38 | A:0.657895       |              | AT:0.342105     |
| chr28          | 10740404 | 3 | 36 | C:0.75           | CT:0.0833333 | CTT:            |
| 0.166667       |          |   |    |                  |              |                 |
| chr28          | 10740445 | 3 | 38 | CAGAGAG:0.710526 |              | C:0.105263      |
| CAGAG:0.184211 |          |   |    |                  |              |                 |
| chr28          | 10740947 | 2 | 40 | T:0.75           | C:0.25       |                 |
| chr28          | 10741145 | 2 | 38 | T:1              | G:0          |                 |
| chr28          | 10741571 | 2 | 32 | T:0.9375         | C:0.0625     |                 |
| chr28          | 10741822 | 2 | 38 | G:1              | A:0          |                 |

|       |                   |   |    |                        |                         |               |
|-------|-------------------|---|----|------------------------|-------------------------|---------------|
| chr28 | 10742324          | 2 | 40 | T:0.95                 | C:0.05                  |               |
| chr28 | 10742707          | 2 | 38 | C:0.763158             |                         | CT:0.236842   |
| chr28 | 10742710          | 2 | 38 | T:0.921053             |                         | TAA:0.0789474 |
| chr28 | 10743089          | 2 | 38 | C:1                    | T:0                     |               |
| chr28 | 10743465          | 2 | 38 | C:1                    | T:0                     |               |
| chr28 | 10744059          | 2 | 36 | G:0.944444             |                         | C:0.0555556   |
| chr28 | 10744615          | 2 | 38 | T:0.763158             |                         | C:0.236842    |
| chr28 | 10744908          | 2 | 40 | G:1                    | A:0                     |               |
| chr28 | 10745602          | 2 | 36 | T:0.972222             |                         | C:0.0277778   |
| chr28 | 10746348          | 2 | 36 | T:0.75                 | C:0.25                  |               |
| chr28 | 10746405          | 2 | 38 | C:0.973684             |                         | T:0.0263158   |
| chr28 | 10746557          | 2 | 38 | T:1                    | G:0                     |               |
| chr28 | 10747138          | 2 | 40 | C:1                    | T:0                     |               |
| chr28 | 10747901          | 2 | 38 | A:0.789474             |                         | AAAG:0.210526 |
| chr28 | 10748051          | 2 | 38 | G:0.894737             |                         | A:0.105263    |
| chr28 | 10748086          | 2 | 38 | A:0.763158             |                         | G:0.236842    |
| chr28 | 10748125          | 2 | 38 | G:0.894737             |                         | T:0.105263    |
| chr28 | 10748217          | 2 | 30 | TA:0.666667            |                         | T:0.333333    |
| chr28 | 10748235          | 2 | 38 | A:0.842105             |                         | T:0.157895    |
| chr28 | 10748238          | 2 | 38 | A:0.842105             |                         | G:0.157895    |
| chr28 | 10748313          | 2 | 40 | TCCTG:1                | T:0                     |               |
| chr28 | 10748702          | 2 | 38 | C:1                    | T:0                     |               |
| chr28 | 10748721          | 2 | 36 | C:0.944444             |                         | T:0.0555556   |
| chr28 | 10750001          | 2 | 40 | A:0.85                 | G:0.15                  |               |
| chr28 | 10750349          | 2 | 36 | T:0.555556             |                         | C:0.444444    |
| chr28 | 10750796          | 2 | 36 | AG:0.888889            |                         | A:0.111111    |
| chr28 | 10750958          | 2 | 32 | C:0.875                | G:0.125                 |               |
| chr28 | 10750978          | 3 | 36 | TAAA:0.833333          |                         | T:0.111111    |
|       | TAAAA:0.0555556   |   |    |                        |                         |               |
| chr28 | 10751008          | 2 | 40 | A:1                    | G:0                     |               |
| chr28 | 10751976          | 2 | 38 | A:1                    | G:0                     |               |
| chr28 | 10752176          | 2 | 40 | A:0.7                  | G:0.3                   |               |
| chr28 | 10753060          | 2 | 34 | CAT:0.882353           |                         | C:0.117647    |
| chr28 | 10753191          | 4 | 40 | AAAAAC:0.3             |                         | A:0.05        |
|       | AAAAACAAAAC:0.625 |   |    | AAAAACAAAACAAAAC:0.025 |                         |               |
| chr28 | 10753229          | 3 | 40 | A:0.95                 | C:0                     | AACAAC:0.05   |
| chr28 | 10753234          | 2 | 40 | C:0.775                | CAAAA:0.225             |               |
| chr28 | 10753435          | 2 | 36 | C:0.916667             |                         | A:0.0833333   |
| chr28 | 10753754          | 2 | 38 | G:0.973684             |                         | A:0.0263158   |
| chr28 | 10755296          | 2 | 40 | T:1                    | C:0                     |               |
| chr28 | 10755601          | 2 | 40 | A:0.95                 | C:0.05                  |               |
| chr28 | 10756021          | 2 | 38 | A:0.973684             |                         | G:0.0263158   |
| chr28 | 10756752          | 2 | 38 | AAAAC:0.605263         |                         | A:0.394737    |
| chr28 | 10757820          | 2 | 38 | T:0.868421             |                         | C:0.131579    |
| chr28 | 10758996          | 2 | 40 | G:0.775                | A:0.225                 |               |
| chr28 | 10760078          | 2 | 40 | A:0.825                | AT:0.175                |               |
| chr28 | 10760230          | 2 | 40 | T:0.95                 | C:0.05                  |               |
| chr28 | 10761064          | 2 | 40 | A:0.75                 | ATAGTT:0.25             |               |
| chr28 | 10761196          | 3 | 36 | CA:0.444444            |                         | C:0.277778    |
|       | CAA:0.277778      |   |    |                        |                         |               |
| chr28 | 10761567          | 2 | 40 | A:0.8                  | ACAGCTATTTTTGTGTCTG:0.2 |               |
| chr28 | 10761664          | 2 | 36 | C:0.833333             |                         | T:0.166667    |
| chr28 | 10761718          | 2 | 38 | T:1                    | C:0                     |               |
| chr28 | 10761997          | 2 | 38 | AT:0.973684            |                         | A:0.0263158   |

|       |                                  |    |                     |                  |
|-------|----------------------------------|----|---------------------|------------------|
| chr28 | 10762095 2                       | 34 | C:0.970588          | T:0.0294118      |
| chr28 | 10762286 4                       | 40 | TAAAA:0.475         | T:0.2 TAA:0.15   |
|       | TAAA:0.175                       |    |                     |                  |
| chr28 | 10762464 2                       | 36 | T:0.944444          | TATGTC:0.0555556 |
| chr28 | 10762491 2                       | 36 | G:1 C:0             |                  |
| chr28 | 10762522 2                       | 36 | T:0.833333          | C:0.166667       |
| chr28 | 10763694 2                       | 40 | G:1 A:0             |                  |
| chr28 | 10763987 4                       | 40 | CAGAG:0.55          | C:0.2 CAG:       |
|       | 0.175 CAGAGAG:0.075              |    |                     |                  |
| chr28 | 10764143 2                       | 40 | T:0.675 C:0.325     |                  |
| chr28 | 10764367 2                       | 40 | C:0.75 T:0.25       |                  |
| chr28 | 10764591 2                       | 38 | T:0.763158          | C:0.236842       |
| chr28 | 10765710 2                       | 36 | A:0.777778          | C:0.222222       |
| chr28 | 10765969 2                       | 38 | T:0.947368          | C:0.0526316      |
| chr28 | 10766709 4                       | 38 | TAG:0.289474        | T:0.342105       |
|       | TAGAG:0.289474 TAGAGAG:0.0789474 |    |                     |                  |
| chr28 | 10766801 2                       | 38 | C:0.973684          | T:0.0263158      |
| chr28 | 10767588 2                       | 36 | A:0.916667          | G:0.0833333      |
| chr28 | 10767617 2                       | 36 | CACA:1 C:0          |                  |
| chr28 | 10767623 2                       | 38 | G:0.789474          | T:0.210526       |
| chr28 | 10767629 2                       | 38 | C:0.789474          | A:0.210526       |
| chr28 | 10768234 2                       | 40 | G:0.95 GT:0.05      |                  |
| chr28 | 10768246 2                       | 40 | T:0.85 A:0.15       |                  |
| chr28 | 10768247 2                       | 40 | A:0.675 T:0.325     |                  |
| chr28 | 10769125 2                       | 40 | AATGT:1 A:0         |                  |
| chr28 | 10769156 2                       | 40 | C:0.725 A:0.275     |                  |
| chr28 | 10769679 2                       | 40 | T:0.975 C:0.025     |                  |
| chr28 | 10769736 2                       | 38 | A:0.973684          | G:0.0263158      |
| chr28 | 10770443 2                       | 40 | G:1 C:0             |                  |
| chr28 | 10770945 2                       | 40 | A:0.8 G:0.2         |                  |
| chr28 | 10771080 2                       | 36 | A:0.722222          | ACT:0.277778     |
| chr28 | 10772205 2                       | 36 | TA:0.833333         | T:0.166667       |
| chr28 | 10772387 3                       | 38 | ATT:0.5 A:0.0526316 | AT:              |
|       | 0.447368                         |    |                     |                  |
| chr28 | 10772437 2                       | 36 | CAG:1 C:0           |                  |
| chr28 | 10772439 2                       | 36 | G:0.888889          | C:0.111111       |
| chr28 | 10772859 2                       | 38 | C:0.684211          | T:0.315789       |
| chr28 | 10772884 2                       | 38 | TA:0.789474         | T:0.210526       |
| chr28 | 10773090 2                       | 36 | T:0.416667          | C:0.583333       |
| chr28 | 10773296 2                       | 36 | C:1 T:0             |                  |
| chr28 | 10773321 2                       | 34 | C:0.794118          | CT:0.205882      |
| chr28 | 10774112 2                       | 40 | CTA:0.95 C:0.05     |                  |
| chr28 | 10774172 3                       | 40 | AAAAC:0.825         | A:0.05           |
|       | AAAACAAAC:0.125                  |    |                     |                  |
| chr28 | 10774615 2                       | 40 | G:0.975 A:0.025     |                  |
| chr28 | 10774791 2                       | 40 | G:0.8 A:0.2         |                  |
| chr28 | 10774957 2                       | 40 | A:0.975 C:0.025     |                  |
| chr28 | 10775164 2                       | 38 | G:0.736842          | A:0.263158       |
| chr28 | 10776442 2                       | 40 | T:0.75 C:0.25       |                  |
| chr28 | 10776469 2                       | 40 | AT:0.925 A:0.075    |                  |
| chr28 | 10776941 2                       | 38 | A:0.763158          | T:0.236842       |
| chr28 | 10777379 2                       | 36 | C:0.833333          | T:0.166667       |
| chr28 | 10777681 2                       | 38 | A:0.921053          | AAAAAG:0.0789474 |
| chr28 | 10777772 2                       | 40 | C:0.825 T:0.175     |                  |



|             |          |   |    |                   |               |
|-------------|----------|---|----|-------------------|---------------|
| chr28       | 10777871 | 2 | 38 | T:0.736842        | A:0.263158    |
| chr28       | 10778270 | 2 | 40 | GA:1 G:0          |               |
| chr28       | 10778309 | 2 | 38 | C:0.710526        | T:0.289474    |
| chr28       | 10778666 | 2 | 36 | C:0.944444        | T:0.0555556   |
| chr28       | 10779001 | 2 | 34 | C:0.941176        | T:0.0588235   |
| chr28       | 10779043 | 2 | 38 | C:0.973684        | T:0.0263158   |
| chr28       | 10779220 | 2 | 36 | C:1 CT:0          |               |
| chr28       | 10779294 | 2 | 36 | C:0.75 T:0.25     |               |
| chr28       | 10779582 | 2 | 40 | G:0.825 T:0.175   |               |
| chr28       | 10779588 | 2 | 40 | G:1 T:0           |               |
| chr28       | 10780909 | 2 | 38 | TA:0.947368       | T:0.0526316   |
| chr28       | 10780910 | 3 | 36 | ATT:0.833333      | A:0.0555556   |
| AT:0.111111 |          |   |    |                   |               |
| chr28       | 10781368 | 2 | 36 | C:1 T:0           |               |
| chr28       | 10781582 | 2 | 40 | TTC:1 T:0         |               |
| chr28       | 10781588 | 2 | 40 | T:1 C:0           |               |
| chr28       | 10782031 | 2 | 36 | C:0.833333        | T:0.166667    |
| chr28       | 10782115 | 2 | 36 | T:0.861111        | TA:0.138889   |
| chr28       | 10782176 | 2 | 36 | T:0.694444        | TCTG:0.305556 |
| chr28       | 10782912 | 2 | 34 | A:0.735294        | G:0.264706    |
| chr28       | 10783073 | 2 | 28 | T:0.964286        | TA:0.0357143  |
| chr28       | 10783138 | 2 | 16 | G:1 A:0           |               |
| chr28       | 10783392 | 2 | 28 | G:0.607143        | GC:0.392857   |
| chr28       | 10783837 | 2 | 36 | C:0.833333        | T:0.166667    |
| chr28       | 10784018 | 2 | 30 | G:1 T:0           |               |
| chr28       | 10784077 | 2 | 18 | G:1 C:0           |               |
| chr28       | 10785442 | 2 | 36 | G:0.888889        | A:0.111111    |
| chr28       | 10786021 | 2 | 30 | G:0.933333        | A:0.0666667   |
| chr28       | 10786049 | 2 | 38 | T:0.921053        | G:0.0789474   |
| chr28       | 10786062 | 2 | 38 | G:0.763158        | T:0.236842    |
| chr28       | 10786076 | 2 | 38 | G:0 T:1           |               |
| chr28       | 10786136 | 2 | 40 | C:0 G:1           |               |
| chr28       | 10786220 | 2 | 38 | T:0.973684        | C:0.0263158   |
| chr28       | 10786342 | 2 | 36 | G:0.944444        | A:0.0555556   |
| chr28       | 10786343 | 2 | 36 | G:0.944444        | A:0.0555556   |
| chr28       | 10786477 | 2 | 40 | G:0.9 T:0.1       |               |
| chr28       | 10786561 | 2 | 38 | C:0.842105        | T:0.157895    |
| chr28       | 10786564 | 2 | 38 | G:0.894737        | T:0.105263    |
| chr28       | 10786946 | 2 | 40 | G:1 A:0           |               |
| chr28       | 10787158 | 2 | 40 | T:0.975 C:0.025   |               |
| chr28       | 10787239 | 2 | 38 | CTTTCT:0.421053   | C:0.578947    |
| chr28       | 10787349 | 2 | 24 | G:0.25 T:0.75     |               |
| chr28       | 10787915 | 2 | 36 | GC:0 G:1          |               |
| chr28       | 10788645 | 2 | 36 | C:0 G:1           |               |
| chr28       | 10788875 | 2 | 40 | AGCATCCTGCC:0.875 | A:0.125       |
| chr28       | 10788888 | 2 | 40 | A:1 G:0           |               |
| chr28       | 10789147 | 2 | 40 | C:1 T:0           |               |
| chr28       | 10789640 | 2 | 40 | CA:0.9 C:0.1      |               |
| chr28       | 10789643 | 2 | 40 | TGGGC:0.9         | T:0.1         |
| chr28       | 10789652 | 2 | 40 | C:0.9 T:0.1       |               |
| chr28       | 10789771 | 2 | 36 | G:0.805556        | A:0.194444    |
| chr28       | 10789774 | 2 | 36 | G:0.944444        | A:0.0555556   |
| chr28       | 10790103 | 2 | 38 | T:0.710526        | C:0.289474    |
| chr28       | 10790171 | 2 | 36 | C:0.944444        | T:0.0555556   |

|                      |          |   |    |                      |            |                 |
|----------------------|----------|---|----|----------------------|------------|-----------------|
| chr28                | 10790236 | 3 | 40 | A:0.825              | AGATG:0    | AGATGGATG:0.175 |
| chr28                | 10790365 | 2 | 38 | ATTT:0.789474        |            | A:0.210526      |
| chr28                | 10790372 | 2 | 40 | T:1                  | TA:0       |                 |
| chr28                | 10790396 | 2 | 40 | G:1                  | A:0        |                 |
| chr28                | 10790601 | 2 | 40 | G:0.85               | C:0.15     |                 |
| chr28                | 10790641 | 2 | 40 | G:0.95               | A:0.05     |                 |
| chr28                | 10790672 | 2 | 38 | G:0.921053           |            | A:0.0789474     |
| chr28                | 10791027 | 2 | 40 | A:0.875              | G:0.125    |                 |
| chr28                | 10791097 | 2 | 36 | A:0.888889           |            | G:0.111111      |
| chr28                | 10791288 | 2 | 38 | G:0.868421           |            | GTGCTAGAGC:     |
| 0.131579             |          |   |    |                      |            |                 |
| chr28                | 10791360 | 2 | 28 | T:0.25               | C:0.75     |                 |
| chr28                | 10791635 | 2 | 40 | TAAAAAAA:0.975       |            | T:0.025         |
| chr28                | 10791636 | 2 | 38 | A:1                  | T:0        |                 |
| chr28                | 10791651 | 2 | 40 | A:0.975              | T:0.025    |                 |
| chr28                | 10791925 | 2 | 40 | CT:0.375             | C:0.625    |                 |
| chr28                | 10791931 | 2 | 40 | A:0.925              | T:0.075    |                 |
| chr28                | 10792362 | 2 | 40 | G:1                  | A:0        |                 |
| chr28                | 10792475 | 2 | 38 | C:0.263158           |            | T:0.736842      |
| chr28                | 10792513 | 2 | 38 | G:0.894737           |            | A:0.105263      |
| chr28                | 10792605 | 2 | 40 | C:0.95               | CATGA:0.05 |                 |
| chr28                | 10792682 | 2 | 40 | G:0.95               | A:0.05     |                 |
| chr28                | 10792694 | 4 | 40 | GCACA:0.3            |            | G:0.025 GCA:    |
| 0.625 GCACACACA:0.05 |          |   |    |                      |            |                 |
| chr28                | 10792696 | 2 | 40 | A:0.975              | G:0.025    |                 |
| chr28                | 10792698 | 2 | 40 | A:0.975              | G:0.025    |                 |
| chr28                | 10792700 | 2 | 40 | A:1                  | G:0        |                 |
| chr28                | 10792702 | 2 | 40 | A:1                  | G:0        |                 |
| chr28                | 10792912 | 2 | 36 | C:0.305556           |            | A:0.694444      |
| chr28                | 10792915 | 2 | 36 | GT:0.944444          |            | G:0.0555556     |
| chr28                | 10793232 | 2 | 38 | G:1                  | A:0        |                 |
| chr28                | 10793344 | 2 | 40 | G:0.675              | GA:0.325   |                 |
| chr28                | 10793715 | 2 | 36 | A:0.25               | C:0.75     |                 |
| chr28                | 10793717 | 2 | 36 | A:0.916667           |            | C:0.0833333     |
| chr28                | 10793778 | 2 | 36 | A:1                  | G:0        |                 |
| chr28                | 10794281 | 2 | 40 | C:0.325              | T:0.675    |                 |
| chr28                | 10794711 | 2 | 38 | ACCC:1               | A:0        |                 |
| chr28                | 10794779 | 2 | 38 | C:0.842105           |            | T:0.157895      |
| chr28                | 10796986 | 2 | 40 | A:0.275              | G:0.725    |                 |
| chr28                | 10797230 | 2 | 38 | A:0.289474           |            | G:0.710526      |
| chr28                | 10797858 | 2 | 38 | AGGGTTGGGGC:0.368421 |            | A:              |
| 0.631579             |          |   |    |                      |            |                 |
| chr28                | 10798030 | 2 | 38 | T:0.289474           |            | C:0.710526      |
| chr28                | 10798522 | 2 | 38 | G:0.368421           |            | A:0.631579      |
| chr28                | 10798608 | 2 | 34 | A:0.147059           |            | C:0.852941      |
| chr28                | 10798699 | 2 | 36 | C:1                  | T:0        |                 |
| chr28                | 10798759 | 2 | 40 | T:0.6                | C:0.4      |                 |
| chr28                | 10798910 | 2 | 38 | TG:0.315789          |            | T:0.684211      |
| chr28                | 10798916 | 2 | 40 | GCACC:0.725          |            | G:0.275         |
| chr28                | 10798919 | 2 | 38 | C:0.315789           |            | CA:0.684211     |
| chr28                | 10799285 | 2 | 40 | C:0.3                | A:0.7      |                 |
| chr28                | 10799467 | 2 | 38 | C:0.368421           |            | T:0.631579      |
| chr28                | 10799500 | 2 | 38 | T:0.368421           |            | C:0.631579      |
| chr28                | 10799935 | 2 | 36 | T:0.555556           |            | G:0.444444      |

|       |          |   |    |               |                                  |
|-------|----------|---|----|---------------|----------------------------------|
| chr28 | 10800458 | 2 | 40 | C:0.9         | T:0.1                            |
| chr28 | 10800816 | 2 | 40 | T:1           | TAA:0                            |
| chr28 | 10800817 | 2 | 40 | GCT:1         | G:0                              |
| chr28 | 10800836 | 2 | 40 | G:0.75        | A:0.25                           |
| chr28 | 10801389 | 2 | 40 | G:0.925       | T:0.075                          |
| chr28 | 10801683 | 2 | 40 | G:0.375       | A:0.625                          |
| chr28 | 10801900 | 2 | 40 | G:0.6         | A:0.4                            |
| chr28 | 10802217 | 2 | 36 | AAGAG:0.75    | A:0.25                           |
| chr28 | 10802229 | 2 | 36 | G:0.972222    | A:0.0277778                      |
| chr28 | 10803019 | 2 | 40 | C:0.975       | T:0.025                          |
| chr28 | 10803956 | 2 | 38 | T:1           | G:0                              |
| chr28 | 10804116 | 2 | 40 | G:0.75        | A:0.25                           |
| chr28 | 10804198 | 2 | 36 | CTG:0.555556  | C:0.444444                       |
| chr28 | 10804280 | 2 | 38 | TA:0.763158   | T:0.236842                       |
| chr28 | 10805161 | 2 | 38 | A:0.736842    | G:0.263158                       |
| chr28 | 10805332 | 2 | 40 | T:0.95        | TG:0.05                          |
| chr28 | 10805334 | 2 | 40 | A:0.95        | AGACAAAAGAAGGAGACAGC:0.05        |
| chr28 | 10805337 | 2 | 40 | GCTCTCTC:0.95 | G:0.05                           |
| chr28 | 10805458 | 2 | 40 | G:0.775       | A:0.225                          |
| chr28 | 10805484 | 2 | 40 | C:1           | T:0                              |
| chr28 | 10805708 | 2 | 40 | A:0.375       | T:0.625                          |
| chr28 | 10805938 | 2 | 26 | C:1           | T:0                              |
| chr28 | 10806164 | 2 | 30 | T:0.666667    | C:0.333333                       |
| chr28 | 10807229 | 2 | 40 | A:1           | G:0                              |
| chr28 | 10807334 | 2 | 40 | G:0.625       | A:0.375                          |
| chr28 | 10807952 | 2 | 40 | CT:1          | C:0                              |
| chr28 | 10808716 | 2 | 40 | G:0.225       | T:0.775                          |
| chr28 | 10808723 | 2 | 40 | C:0.4         | CTCTT:0.6                        |
| chr28 | 10808727 | 2 | 40 | T:1           | TTCTTTC:0                        |
| chr28 | 10808788 | 2 | 36 | G:1           | A:0                              |
| chr28 | 10810294 | 2 | 40 | G:0.875       | GAAAAAAAAAAAAAAAAAAAAA:<br>0.125 |
| chr28 | 10810296 | 2 | 40 | A:0.825       | AAAATCTGATGAGGT:0.175            |
| chr28 | 10810503 | 2 | 34 | G:0.735294    | A:0.264706                       |
| chr28 | 10810518 | 2 | 36 | G:0.777778    | T:0.222222                       |
| chr28 | 10810680 | 2 | 38 | C:0.289474    | T:0.710526                       |
| chr28 | 10810910 | 2 | 38 | T:0.368421    | C:0.631579                       |
| chr28 | 10811208 | 2 | 38 | GT:0.342105   | G:0.657895                       |
| chr28 | 10811217 | 2 | 38 | C:0.342105    | T:0.657895                       |
| chr28 | 10811295 | 2 | 40 | G:0.275       | C:0.725                          |
| chr28 | 10811860 | 2 | 36 | A:0.666667    | G:0.333333                       |
| chr28 | 10811995 | 2 | 36 | G:0.666667    | T:0.333333                       |
| chr28 | 10812105 | 2 | 38 | A:0.894737    | G:0.105263                       |
| chr28 | 10812120 | 2 | 38 | G:0.657895    | A:0.342105                       |
| chr28 | 10812280 | 2 | 38 | T:0.263158    | C:0.736842                       |
| chr28 | 10812446 | 2 | 38 | C:0.342105    | T:0.657895                       |
| chr28 | 10812841 | 2 | 34 | G:0.235294    | A:0.764706                       |
| chr28 | 10812961 | 2 | 38 | A:1           | G:0                              |
| chr28 | 10813514 | 2 | 34 | T:0.470588    | A:0.529412                       |
| chr28 | 10814023 | 2 | 38 | A:0.815789    | G:0.184211                       |
| chr28 | 10814099 | 2 | 40 | AT:0.7        | A:0.3                            |
| chr28 | 10814148 | 2 | 38 | C:0.921053    | CT:0.0789474                     |
| chr28 | 10814149 | 2 | 38 | C:0.447368    | T:0.552632                       |
| chr28 | 10814150 | 3 | 38 | C:0.921053    | T:0.0789474                      |

CTT:0

|                   |          |   |    |                 |          |               |
|-------------------|----------|---|----|-----------------|----------|---------------|
| chr28             | 10814876 | 2 | 30 | C:0.2           | G:0.8    |               |
| chr28             | 10815237 | 2 | 36 | G:0.333333      |          | A:0.666667    |
| chr28             | 10815616 | 2 | 36 | G:0.666667      |          | T:0.333333    |
| chr28             | 10815779 | 2 | 40 | CG:0.775        | C:0.225  |               |
| chr28             | 10815825 | 4 | 40 | CCTCTCTCT:0.225 | C:0.45   | CCT:0.15      |
| CTTCTCTCTCT:0.175 |          |   |    |                 |          |               |
| chr28             | 10815846 | 2 | 34 | C:0.823529      |          | G:0.176471    |
| chr28             | 10815848 | 2 | 30 | C:0.533333      |          | G:0.466667    |
| chr28             | 10815896 | 2 | 34 | T:0.470588      |          | TA:0.529412   |
| chr28             | 10816356 | 2 | 40 | A:0.625         | G:0.375  |               |
| chr28             | 10816447 | 2 | 40 | G:0.825         | A:0.175  |               |
| chr28             | 10816779 | 2 | 36 | G:0.972222      |          | A:0.0277778   |
| chr28             | 10816995 | 2 | 38 | G:0.394737      |          | A:0.605263    |
| chr28             | 10817370 | 2 | 36 | A:0.75          | G:0.25   |               |
| chr28             | 10817535 | 2 | 34 | G:0.676471      |          | T:0.323529    |
| chr28             | 10818450 | 2 | 38 | A:0.894737      |          | G:0.105263    |
| chr28             | 10819367 | 2 | 38 | A:0.657895      |          | G:0.342105    |
| chr28             | 10819539 | 2 | 36 | T:0.638889      |          | C:0.361111    |
| chr28             | 10819736 | 2 | 38 | C:0.947368      |          | CG:0.0526316  |
| chr28             | 10819935 | 3 | 32 | TA:0.78125      |          | T:0.1875 TAA: |
| 0.03125           |          |   |    |                 |          |               |
| chr28             | 10820648 | 2 | 40 | C:0.75          | T:0.25   |               |
| chr28             | 10821105 | 2 | 38 | A:1             | G:0      |               |
| chr28             | 10821281 | 2 | 34 | G:0.470588      |          | A:0.529412    |
| chr28             | 10821414 | 2 | 40 | G:0.825         | A:0.175  |               |
| chr28             | 10821971 | 2 | 38 | C:1             | T:0      |               |
| chr28             | 10822368 | 2 | 36 | T:0.388889      |          | C:0.611111    |
| chr28             | 10822387 | 2 | 36 | C:0.361111      |          | T:0.638889    |
| chr28             | 10823190 | 2 | 40 | T:0.65          | C:0.35   |               |
| chr28             | 10823207 | 2 | 40 | T:0.675         | TA:0.325 |               |
| chr28             | 10823751 | 2 | 40 | T:0.45          | A:0.55   |               |
| chr28             | 10823975 | 2 | 36 | G:0.888889      |          | A:0.111111    |
| chr28             | 10824004 | 2 | 38 | C:0             | A:1      |               |
| chr28             | 10824116 | 2 | 38 | T:0.736842      |          | C:0.263158    |
| chr28             | 10824189 | 2 | 34 | G:0.617647      |          | A:0.382353    |
| chr28             | 10824896 | 2 | 32 | T:0.78125       |          | C:0.21875     |
| chr28             | 10825145 | 2 | 34 | A:0.705882      |          | C:0.294118    |
| chr28             | 10825361 | 2 | 34 | G:0.970588      |          | A:0.0294118   |
| chr28             | 10825928 | 2 | 38 | A:1             | G:0      |               |
| chr28             | 10826445 | 2 | 36 | T:0.277778      |          | C:0.722222    |
| chr28             | 10826488 | 2 | 38 | C:0.842105      |          | T:0.157895    |
| chr28             | 10826717 | 2 | 38 | G:0.263158      |          | A:0.736842    |
| chr28             | 10827088 | 2 | 40 | T:0.25          | C:0.75   |               |
| chr28             | 10827157 | 2 | 36 | G:0.305556      |          | A:0.694444    |
| chr28             | 10827382 | 2 | 40 | T:0.225         | C:0.775  |               |
| chr28             | 10827768 | 2 | 36 | CATTT:0.722222  |          | C:0.277778    |
| chr28             | 10827809 | 2 | 34 | G:1             | A:0      |               |
| chr28             | 10828635 | 2 | 40 | T:0.6           | C:0.4    |               |
| chr28             | 10829371 | 2 | 40 | G:0.85          | A:0.15   |               |
| chr28             | 10830034 | 2 | 36 | T:0.694444      |          | TA:0.305556   |
| chr28             | 10830214 | 2 | 40 | T:0.825         | TA:0.175 |               |
| chr28             | 10830246 | 2 | 40 | G:0.825         | A:0.175  |               |
| chr28             | 10830435 | 2 | 36 | A:1             | C:0      |               |

|                            |          |   |    |                    |                           |
|----------------------------|----------|---|----|--------------------|---------------------------|
| chr28                      | 10830652 | 2 | 40 | T:0.75             | C:0.25                    |
| chr28                      | 10831011 | 2 | 38 | G:1                | A:0                       |
| chr28                      | 10831614 | 2 | 38 | T:1                | G:0                       |
| chr28                      | 10831690 | 2 | 36 | G:0.75             | A:0.25                    |
| chr28                      | 10832068 | 2 | 40 | C:0.975            | T:0.025                   |
| chr28                      | 10832590 | 2 | 34 | TAAAAA:0.529412    | T:0.470588                |
| chr28                      | 10833107 | 2 | 38 | C:0.789474         | A:0.210526                |
| chr28                      | 10833406 | 2 | 40 | G:0.75             | A:0.25                    |
| chr28                      | 10833643 | 2 | 38 | A:0.736842         | C:0.263158                |
| chr28                      | 10833794 | 2 | 40 | G:1                | A:0                       |
| chr28                      | 10833839 | 3 | 40 | G:0.625            | GTTCTTTTCTTTTCTT:0.225    |
| GTTCTTTTCTTTTCTTTTCTT:0.15 |          |   |    |                    |                           |
| chr28                      | 10833871 | 2 | 40 | T:0.85             | TC:0.15                   |
| chr28                      | 10833872 | 2 | 40 | T:0.85             | TTTTCTTTTCTTTTCTTTTC:0.15 |
| chr28                      | 10834198 | 2 | 36 | A:0.777778         | T:0.222222                |
| chr28                      | 10834480 | 2 | 36 | G:1                | T:0                       |
| chr28                      | 10835886 | 2 | 38 | T:0.815789         | G:0.184211                |
| chr28                      | 10836669 | 2 | 32 | G:0.28125          | GC:0.71875                |
| chr28                      | 10837170 | 2 | 34 | G:1                | A:0                       |
| chr28                      | 10837946 | 2 | 38 | G:0.947368         | T:0.0526316               |
| chr28                      | 10838357 | 2 | 38 | G:0.710526         | C:0.289474                |
| chr28                      | 10838463 | 2 | 36 | T:0.972222         | C:0.0277778               |
| chr28                      | 10838727 | 2 | 36 | C:0.75             | T:0.25                    |
| chr28                      | 10839018 | 2 | 34 | AG:1               | A:0                       |
| chr28                      | 10839579 | 2 | 38 | C:0.394737         | T:0.605263                |
| chr28                      | 10839669 | 2 | 34 | A:0.794118         | G:0.205882                |
| chr28                      | 10839670 | 2 | 34 | T:0.794118         | G:0.205882                |
| chr28                      | 10839780 | 3 | 36 | TTAAATAAA:0.333333 | T:                        |
| 0.361111 TTAAA:0.305556    |          |   |    |                    |                           |
| chr28                      | 10840014 | 2 | 36 | G:0.277778         | C:0.722222                |
| chr28                      | 10840673 | 2 | 40 | G:1                | A:0                       |
| chr28                      | 10840824 | 2 | 38 | A:0.0526316        | T:0.947368                |
| chr28                      | 10840924 | 2 | 40 | C:1                | T:0                       |
| chr28                      | 10841198 | 2 | 32 | G:0.9375           | A:0.0625                  |
| chr28                      | 10841364 | 2 | 38 | T:0.184211         | A:0.815789                |
| chr28                      | 10841596 | 2 | 40 | T:0.825            | C:0.175                   |
| chr28                      | 10842018 | 2 | 36 | A:0.722222         | C:0.277778                |
| chr28                      | 10842498 | 2 | 40 | T:0                | C:1                       |
| chr28                      | 10843285 | 2 | 34 | G:1                | A:0                       |
| chr28                      | 10843350 | 2 | 34 | A:0.764706         | G:0.235294                |
| chr28                      | 10843359 | 2 | 34 | T:0.970588         | G:0.0294118               |
| chr28                      | 10843728 | 2 | 38 | T:0.657895         | C:0.342105                |
| chr28                      | 10843855 | 2 | 40 | G:0.7              | C:0.3                     |
| chr28                      | 10843924 | 2 | 40 | T:0.675            | C:0.325                   |
| chr28                      | 10843962 | 2 | 36 | G:0.611111         | A:0.388889                |
| chr28                      | 10844288 | 2 | 40 | G:0.75             | C:0.25                    |
| chr28                      | 10844333 | 2 | 40 | GACTGAGAGT:0.675   | G:0.325                   |
| chr28                      | 10844335 | 2 | 40 | C:0.325            | CT:0.675                  |
| chr28                      | 10844341 | 2 | 40 | GT:0.325           | G:0.675                   |
| chr28                      | 10844570 | 2 | 36 | A:0.194444         | G:0.805556                |
| chr28                      | 10844616 | 2 | 38 | A:0.210526         | G:0.789474                |
| chr28                      | 10844668 | 2 | 38 | CT:0.315789        | C:0.684211                |
| chr28                      | 10844683 | 3 | 38 | ATT:0.289474       | A:0.657895                |
| AT:0.0526316               |          |   |    |                    |                           |

|       |             |    |              |           |              |
|-------|-------------|----|--------------|-----------|--------------|
| chr28 | 10844687 2  | 38 | T:1          | A:0       |              |
| chr28 | 10844769 2  | 38 | A:0.315789   |           | ACT:0.684211 |
| chr28 | 10844795 2  | 34 | T:0.264706   |           | C:0.735294   |
| chr28 | 10844839 2  | 36 | C:0.944444   |           | T:0.0555556  |
| chr28 | 10844863 2  | 40 | A:0.225      | G:0.775   |              |
| chr28 | 10844929 2  | 38 | C:0.184211   |           | T:0.815789   |
| chr28 | 10845417 2  | 38 | C:0.789474   |           | T:0.210526   |
| chr28 | 10845589 2  | 34 | T:0.705882   |           | C:0.294118   |
| chr28 | 10846118 3  | 38 | CTT:0.315789 |           | C:0.0789474  |
|       | CT:0.605263 |    |              |           |              |
| chr28 | 10846650 2  | 40 | T:0.65       | TAGG:0.35 |              |
| chr28 | 10846675 2  | 38 | C:0.631579   |           | T:0.368421   |
| chr28 | 10846928 2  | 32 | G:0.5        | T:0.5     |              |
| chr28 | 10847235 2  | 40 | G:0.825      | A:0.175   |              |
| chr28 | 10847410 2  | 38 | G:1          | C:0       |              |
| chr28 | 10847418 2  | 38 | A:0.0526316  |           | G:0.947368   |
| chr28 | 10847584 2  | 40 | T:0.275      | A:0.725   |              |
| chr28 | 10847679 2  | 10 | CAG:0.8      | C:0.2     |              |
| chr28 | 10848111 2  | 36 | G:0.277778   |           | A:0.722222   |
| chr28 | 10848174 2  | 36 | T:0.194444   |           | C:0.805556   |
| chr28 | 10848225 2  | 36 | G:0.0833333  |           | A:0.916667   |
| chr28 | 10848239 2  | 38 | C:0.921053   |           | A:0.0789474  |
| chr28 | 10848338 2  | 28 | T:1          | TA:0      |              |
| chr28 | 10848394 2  | 32 | T:0.9375     | A:0.0625  |              |
| chr28 | 10848395 2  | 32 | T:0.9375     | A:0.0625  |              |
| chr28 | 10848499 2  | 22 | A:0.272727   |           | T:0.727273   |
| chr28 | 10849025 2  | 24 | GTTTTT:0     | G:1       |              |
| chr28 | 10849030 2  | 24 | T:0          | TGCCGC:1  |              |
| chr28 | 10849039 2  | 24 | T:0.958333   |           | C:0.0416667  |
| chr28 | 10849065 2  | 24 | GTTT:1       | G:0       |              |
| chr28 | 10849066 2  | 20 | T:0.05       | G:0.95    |              |
| chr28 | 10849067 2  | 20 | TTTT:0.05    |           | TCC:0.95     |
| chr28 | 10849069 2  | 24 | T:1          | G:0       |              |
| chr28 | 10849070 2  | 24 | T:1          | TCC:0     |              |
| chr28 | 10849276 2  | 34 | T:0.764706   |           | C:0.235294   |
| chr28 | 10849368 2  | 34 | C:0.911765   |           | G:0.0882353  |
| chr28 | 10849447 2  | 40 | G:0.3        | A:0.7     |              |
| chr28 | 10849747 2  | 36 | C:0.944444   |           | T:0.0555556  |
| chr28 | 10850041 2  | 36 | A:0.0277778  |           | G:0.972222   |
| chr28 | 10850060 2  | 38 | T:0.315789   |           | C:0.684211   |
| chr28 | 10850147 2  | 40 | CACTG:0.325  |           | C:0.675      |
| chr28 | 10850252 2  | 40 | G:1          | A:0       |              |
| chr28 | 10850338 2  | 38 | G:0.394737   |           | T:0.605263   |
| chr28 | 10850349 2  | 40 | G:0.975      | C:0.025   |              |
| chr28 | 10850419 2  | 40 | T:0.3        | C:0.7     |              |
| chr28 | 10850681 2  | 36 | T:0.277778   |           | G:0.722222   |
| chr28 | 10850687 2  | 36 | T:0.277778   |           | C:0.722222   |
| chr28 | 10850927 2  | 38 | G:1          | C:0       |              |
| chr28 | 10850955 2  | 40 | A:0          | G:1       |              |
| chr28 | 10850988 2  | 38 | C:0.0263158  |           | T:0.973684   |
| chr28 | 10851005 2  | 38 | G:1          | A:0       |              |
| chr28 | 10851045 2  | 38 | C:0.289474   |           | T:0.710526   |
| chr28 | 10851749 2  | 38 | TA:0.210526  |           | T:0.789474   |
| chr28 | 10851825 2  | 38 | T:0.973684   |           | TA:0.0263158 |

|                                                                      |          |   |    |                            |           |              |
|----------------------------------------------------------------------|----------|---|----|----------------------------|-----------|--------------|
| chr28                                                                | 10851934 | 2 | 40 | A:0.275                    | G:0.725   |              |
| chr28                                                                | 10851940 | 2 | 40 | A:0.75                     | G:0.25    |              |
| chr28                                                                | 10852366 | 2 | 38 | A:0.315789                 |           | G:0.684211   |
| chr28                                                                | 10852426 | 2 | 38 | T:0.368421                 |           | C:0.631579   |
| chr28                                                                | 10852547 | 2 | 38 | G:0.263158                 |           | A:0.736842   |
| chr28                                                                | 10852562 | 2 | 38 | C:0.263158                 |           | T:0.736842   |
| chr28                                                                | 10852702 | 2 | 38 | C:1                        | T:0       |              |
| chr28                                                                | 10853084 | 2 | 36 | C:0.972222                 |           | T:0.0277778  |
| chr28                                                                | 10853383 | 2 | 38 | G:1                        | A:0       |              |
| chr28                                                                | 10853503 | 2 | 40 |                            |           |              |
| TGAGCCACCAGAGCCACCCAAGCCATCAGAGCTACCCAAGCCATCCGAGCCACCCAAGCCACCA:0.3 |          |   |    |                            |           |              |
| T:0.7                                                                |          |   |    |                            |           |              |
| chr28                                                                | 10853651 | 2 | 38 | T:0.236842                 |           | A:0.763158   |
| chr28                                                                | 10853841 | 2 | 38 | G:0.973684                 |           | A:0.0263158  |
| chr28                                                                | 10854052 | 2 | 38 | TCAAGTGGCCC:0.921053       |           | T:           |
| 0.0789474                                                            |          |   |    |                            |           |              |
| chr28                                                                | 10854055 | 2 | 38 | A:0.342105                 |           | T:0.657895   |
| chr28                                                                | 10854064 | 2 | 38 | TGG:0.921053               |           | T:0.0789474  |
| chr28                                                                | 10854067 | 2 | 38 | C:0.921053                 |           | A:0.0789474  |
| chr28                                                                | 10854492 | 2 | 40 | G:0                        | C:1       |              |
| chr28                                                                | 10854518 | 2 | 38 | T:1                        | TC:0      |              |
| chr28                                                                | 10854706 | 2 | 36 | C:0.972222                 |           | T:0.0277778  |
| chr28                                                                | 10854778 | 2 | 38 | A:1                        | G:0       |              |
| chr28                                                                | 10854837 | 2 | 40 | C:0.975                    | T:0.025   |              |
| chr28                                                                | 10855201 | 4 | 40 | TTATCTATCTATC:0.55         |           | T:0.15       |
| TTATCTATC:0.125 TTATCTATCTATCTATC:0.175                              |          |   |    |                            |           |              |
| chr28                                                                | 10855616 | 2 | 40 | A:0.025                    | G:0.975   |              |
| chr28                                                                | 10855998 | 2 | 40 | G:0.975                    | GGA:0.025 |              |
| chr28                                                                | 10856001 | 2 | 40 | ATCT:0.975                 |           | A:0.025      |
| chr28                                                                | 10856008 | 2 | 40 | AAAAAAGTTT:0.975           |           | A:0.025      |
| chr28                                                                | 10856018 | 2 | 40 | CAA:0.975                  |           | C:0.025      |
| chr28                                                                | 10856024 | 2 | 40 | GACAAAATTCAAAGTCTGCA:0.975 |           |              |
| G:0.025                                                              |          |   |    |                            |           |              |
| chr28                                                                | 10856047 | 2 | 40 | AGT:0.975                  |           | A:0.025      |
| chr28                                                                | 10856051 | 2 | 40 | TAG:0.975                  |           | T:0.025      |
| chr28                                                                | 10856054 | 2 | 40 | T:0.975                    | TAA:0.025 |              |
| chr28                                                                | 10856060 | 2 | 40 | T:0.975                    | A:0.025   |              |
| chr28                                                                | 10856061 | 2 | 40 | GTT:0.975                  |           | G:0.025      |
| chr28                                                                | 10856067 | 2 | 40 | T:0.975                    | TAA:0.025 |              |
| chr28                                                                | 10856069 | 2 | 40 | T:0.975                    | A:0.025   |              |
| chr28                                                                | 10856605 | 2 | 38 | GC:0.342105                |           | G:0.657895   |
| chr28                                                                | 10856834 | 2 | 40 | G:0.3                      | A:0.7     |              |
| chr28                                                                | 10856891 | 2 | 38 | C:0.710526                 |           | T:0.289474   |
| chr28                                                                | 10857213 | 4 | 40 | GGAGAGAGAGAGAGA:0.725      |           | G:0.075      |
| GGAGAGAGAGA:0.05 GGAGAGAGAGAGAGAGA:0.15                              |          |   |    |                            |           |              |
| chr28                                                                | 10857820 | 2 | 34 | C:0.823529                 |           | CT:0.176471  |
| chr28                                                                | 10857822 | 2 | 36 | TC:0.694444                |           | T:0.305556   |
| chr28                                                                | 10858452 | 2 | 36 | G:1                        | A:0       |              |
| chr28                                                                | 10858753 | 2 | 40 | G:0.95                     | A:0.05    |              |
| chr28                                                                | 10859031 | 2 | 38 | C:0.947368                 |           | A:0.0526316  |
| chr28                                                                | 10859145 | 2 | 40 | G:0.95                     | A:0.05    |              |
| chr28                                                                | 10859432 | 2 | 36 | T:0.305556                 |           | C:0.694444   |
| chr28                                                                | 10859500 | 3 | 38 | C:0.236842                 |           | CCT:0.578947 |
| CCTCT:0.184211                                                       |          |   |    |                            |           |              |

|                            |          |   |    |                   |                |
|----------------------------|----------|---|----|-------------------|----------------|
| chr28                      | 10859548 | 3 | 36 | T:0.111111        | TAA:0.777778   |
| TAAA:0.111111              |          |   |    |                   |                |
| chr28                      | 10859591 | 2 | 38 | A:0.0263158       | G:0.973684     |
| chr28                      | 10859789 | 3 | 38 | GT:0.289474       | G:0.0263158    |
| GTT:0.684211               |          |   |    |                   |                |
| chr28                      | 10859873 | 2 | 36 | C:0.0277778       | G:0.972222     |
| chr28                      | 10859994 | 2 | 40 | A:0.975           | G:0.025        |
| chr28                      | 10860062 | 2 | 38 | A:1               | G:0            |
| chr28                      | 10860259 | 2 | 40 | CAGAAAAA:0.375    | C:0.625        |
| chr28                      | 10860267 | 2 | 40 | TG:0.375          | T:0.625        |
| chr28                      | 10860770 | 2 | 38 | A:0.315789        | G:0.684211     |
| chr28                      | 10861029 | 2 | 36 | G:1               | A:0            |
| chr28                      | 10861190 | 2 | 38 | G:0.552632        | C:0.447368     |
| chr28                      | 10861553 | 2 | 38 | G:0.368421        | A:0.631579     |
| chr28                      | 10861598 | 2 | 36 | C:0.972222        | T:0.0277778    |
| chr28                      | 10861930 | 2 | 38 | G:0.368421        | A:0.631579     |
| chr28                      | 10862118 | 2 | 38 | C:0.973684        | T:0.0263158    |
| chr28                      | 10862629 | 2 | 38 | A:0.394737        | G:0.605263     |
| chr28                      | 10862731 | 2 | 36 | G:1               | T:0            |
| chr28                      | 10862999 | 2 | 38 | C:0.473684        | T:0.526316     |
| chr28                      | 10863039 | 2 | 38 | A:0.947368        | T:0.0526316    |
| chr28                      | 10863951 | 2 | 40 | C:0.7             | T:0.3          |
| chr28                      | 10863957 | 2 | 40 | C:0.375           | T:0.625        |
| chr28                      | 10864055 | 2 | 38 | A:0.789474        | G:0.210526     |
| chr28                      | 10864420 | 2 | 34 | GT:0.441176       | G:0.558824     |
| chr28                      | 10864676 | 2 | 40 | T:0.35            | A:0.65         |
| chr28                      | 10864720 | 2 | 40 | A:0.325           | T:0.675        |
| chr28                      | 10865160 | 2 | 36 | TAC:0.416667      | T:0.583333     |
| chr28                      | 10865211 | 3 | 34 | GT:0.411765       | G:0.588235     |
| GTT:0                      |          |   |    |                   |                |
| chr28                      | 10865255 | 2 | 38 | C:0.342105        | A:0.657895     |
| chr28                      | 10865768 | 4 | 40 | C:0.15            | CT:0.25        |
| CTTT:0.175                 |          |   |    |                   |                |
| chr28                      | 10865823 | 2 | 40 | A:0.8             | AAGAGAGAG:0.2  |
| chr28                      | 10865863 | 2 | 40 | C:0.7             | A:0.3          |
| chr28                      | 10865864 | 2 | 40 | C:0.7             | G:0.3          |
| chr28                      | 10866132 | 2 | 38 | TAGA:1            | T:0            |
| chr28                      | 10866499 | 2 | 40 | G:1               | A:0            |
| chr28                      | 10866730 | 2 | 38 | A:0.973684        | G:0.0263158    |
| chr28                      | 10866868 | 2 | 40 | C:0.975           | A:0.025        |
| chr28                      | 10866882 | 3 | 40 | T:0.4             | TTTTTTTTC:0.55 |
| TTTTTTTTTC:0.05            |          |   |    |                   |                |
| chr28                      | 10866963 | 2 | 38 | T:0.973684        | C:0.0263158    |
| chr28                      | 10867622 | 2 | 40 | T:0.45            | A:0.55         |
| chr28                      | 10867736 | 2 | 38 | G:0.684211        | C:0.315789     |
| chr28                      | 10868147 | 2 | 32 | C:0.65625         | T:0.34375      |
| chr28                      | 10868162 | 2 | 34 | C:0.529412        | T:0.470588     |
| chr28                      | 10868166 | 3 | 38 | CCTCT:0.289474    | C:0.421053     |
| CCTCTCTCTCTCTCTCT:0.289474 |          |   |    |                   |                |
| chr28                      | 10868195 | 2 | 34 | C:0.558824        | T:0.441176     |
| chr28                      | 10868318 | 2 | 40 | T:0.4             | A:0.6          |
| chr28                      | 10868481 | 2 | 36 | A:0.0277778       | T:0.972222     |
| chr28                      | 10868483 | 2 | 36 | T:0.0277778       | C:0.972222     |
| chr28                      | 10868521 | 2 | 40 | CTCTCTCTCTT:0.925 | C:0.075        |



|       |          |   |    |                |               |
|-------|----------|---|----|----------------|---------------|
| chr28 | 10868576 | 2 | 40 | A:0.025        | AAAT:0.975    |
| chr28 | 10868578 | 2 | 40 | A:1            | AT:0          |
| chr28 | 10868758 | 2 | 34 | C:0.676471     | T:0.323529    |
| chr28 | 10868815 | 2 | 38 | G:0.368421     | C:0.631579    |
| chr28 | 10868964 | 2 | 40 | T:0.375        | A:0.625       |
| chr28 | 10869130 | 2 | 36 | C:0.277778     | T:0.722222    |
| chr28 | 10869158 | 2 | 36 | T:0.972222     | G:0.0277778   |
| chr28 | 10869284 | 2 | 40 | A:0.4          | G:0.6         |
| chr28 | 10869285 | 2 | 40 | A:0.4          | C:0.6         |
| chr28 | 10869310 | 2 | 38 | T:0.0263158    | G:0.973684    |
| chr28 | 10869556 | 2 | 38 | C:0.289474     | CTTT:0.710526 |
| chr28 | 10869590 | 2 | 40 | GAGAT:1        | G:0           |
| chr28 | 10869596 | 2 | 38 | GAGAC:0.657895 | G:0.342105    |
| chr28 | 10869650 | 2 | 40 | A:0.35         | T:0.65        |
| chr28 | 10869654 | 2 | 40 | C:0.35         | T:0.65        |
| chr28 | 10869696 | 2 | 32 | C:0.25         | T:0.75        |
| chr28 | 10869731 | 2 | 38 | C:0.342105     | A:0.657895    |
| chr28 | 10869775 | 2 | 40 | T:0.4          | A:0.6         |
| chr28 | 10869897 | 2 | 38 | C:0.315789     | T:0.684211    |
| chr28 | 10870079 | 2 | 36 | C:0.333333     | T:0.666667    |
| chr28 | 10870392 | 2 | 38 | A:0.368421     | G:0.631579    |
| chr28 | 10870618 | 2 | 40 | T:0.4          | G:0.6         |
| chr28 | 10870656 | 2 | 40 | G:0.45         | A:0.55        |
| chr28 | 10870776 | 2 | 32 | G:0.4375       | GT:0.5625     |
| chr28 | 10870878 | 2 | 38 | T:0.973684     | C:0.0263158   |
| chr28 | 10870990 | 2 | 34 | A:0.294118     | G:0.705882    |
| chr28 | 10871005 | 2 | 34 | C:1            | A:0           |
| chr28 | 10871006 | 2 | 34 | C:0.970588     | T:0.0294118   |
| chr28 | 10871062 | 2 | 40 | G:0.3          | T:0.7         |
| chr28 | 10871087 | 2 | 38 | C:0.394737     | T:0.605263    |
| chr28 | 10871128 | 2 | 36 | T:0.388889     | C:0.611111    |
| chr28 | 10871129 | 2 | 36 | G:0.388889     | A:0.611111    |
| chr28 | 10871149 | 2 | 38 | C:0.973684     | T:0.0263158   |
| chr28 | 10871212 | 2 | 36 | G:1            | A:0           |
| chr28 | 10871264 | 2 | 38 | C:0.263158     | A:0.736842    |
| chr28 | 10871302 | 2 | 32 | C:0.3125       | T:0.6875      |
| chr28 | 10871347 | 2 | 40 | T:0.975        | C:0.025       |
| chr28 | 10871425 | 2 | 38 | C:0.342105     | T:0.657895    |
| chr28 | 10871534 | 2 | 38 | A:0.263158     | G:0.736842    |
| chr28 | 10871606 | 2 | 40 | GC:0.95        | G:0.05        |
| chr28 | 10871740 | 2 | 38 | A:1            | G:0           |
| chr28 | 10871886 | 2 | 38 | G:0.394737     | A:0.605263    |
| chr28 | 10871887 | 2 | 38 | T:0.394737     | C:0.605263    |
| chr28 | 10872568 | 2 | 38 | T:0.0263158    | A:0.973684    |
| chr28 | 10872820 | 2 | 34 | AG:0.0294118   | A:0.970588    |
| chr28 | 10872826 | 2 | 36 | T:1            | TA:0          |
| chr28 | 10872858 | 2 | 38 | A:0.421053     | G:0.578947    |
| chr28 | 10872929 | 2 | 38 | T:0.973684     | G:0.0263158   |
| chr28 | 10873807 | 2 | 40 | T:0.45         | C:0.55        |
| chr28 | 10874308 | 2 | 38 | G:0.184211     | A:0.815789    |
| chr28 | 10874488 | 2 | 38 | C:1            | T:0           |
| chr28 | 10874513 | 2 | 38 | C:1            | T:0           |
| chr28 | 10874561 | 2 | 40 | A:1            | C:0           |
| chr28 | 10874875 | 2 | 32 | T:1            | C:0           |

|           |                     |   |    |                |              |                   |      |
|-----------|---------------------|---|----|----------------|--------------|-------------------|------|
| chr28     | 10874877            | 2 | 32 | G:1            | A:0          |                   |      |
| chr28     | 10875700            | 2 | 40 | C:0.975        | T:0.025      |                   |      |
| chr28     | 10876582            | 2 | 40 | C:1            | G:0          |                   |      |
| chr28     | 10876610            | 2 | 38 | G:0.973684     |              | T:0.0263158       |      |
| chr28     | 10876739            | 2 | 40 | G:1            | A:0          |                   |      |
| chr28     | 10877140            | 2 | 36 | G:0.416667     |              | A:0.583333        |      |
| chr28     | 10877370            | 2 | 40 | T:0.025        | G:0.975      |                   |      |
| chr28     | 10877580            | 2 | 38 | TCA:1          | T:0          |                   |      |
| chr28     | 10877612            | 3 | 40 | T:0.25         | TA:0.25      | TAAA:0.5          |      |
| chr28     | 10877971            | 2 | 38 | G:0.973684     |              | T:0.0263158       |      |
| chr28     | 10877998            | 2 | 38 | C:0.973684     |              | T:0.0263158       |      |
| chr28     | 10878014            | 2 | 38 | C:0.973684     |              | A:0.0263158       |      |
| chr28     | 10878049            | 2 | 40 | A:0.975        | T:0.025      |                   |      |
| chr28     | 10878119            | 2 | 40 | A:0.375        | G:0.625      |                   |      |
| chr28     | 10878826            | 2 | 40 | C:1            | T:0          |                   |      |
| chr28     | 10879239            | 2 | 38 | T:0.447368     |              | A:0.552632        |      |
| chr28     | 10879496            | 2 | 40 | T:1            | C:0          |                   |      |
| chr28     | 10879749            | 2 | 38 | G:1            | C:0          |                   |      |
| chr28     | 10879835            | 2 | 40 | C:0.3          | G:0.7        |                   |      |
| chr28     | 10879837            | 2 | 40 | AT:0.95        | A:0.05       |                   |      |
| chr28     | 10879933            | 2 | 40 | T:0.025        | C:0.975      |                   |      |
| chr28     | 10880214            | 2 | 36 | C:0.0277778    |              | T:0.972222        |      |
| chr28     | 10880333            | 2 | 40 | G:0.025        | GATTAA:0.975 |                   |      |
| chr28     | 10880468            | 2 | 40 | C:0.975        | T:0.025      |                   |      |
| chr28     | 10880501            | 2 | 36 | G:0.138889     |              | A:0.861111        |      |
| chr28     | 10880523            | 2 | 32 | C:0.96875      |              | T:0.03125         |      |
| chr28     | 10880620            | 2 | 38 | C:0.236842     |              | G:0.763158        |      |
| chr28     | 10880621            | 2 | 38 | T:0.0789474    |              | TGTGA:0.921053    |      |
| chr28     | 10880633            | 2 | 36 | T:1            | TA:0         |                   |      |
| chr28     | 10880637            | 2 | 38 | A:0.894737     |              | AAAAAAAT:         |      |
| 0.105263  |                     |   |    |                |              |                   |      |
| chr28     | 10880638            | 3 | 38 | A:0.184211     |              | AAAAAAAT:0.736842 |      |
|           | AAAAAAATT:0.0789474 |   |    |                |              |                   |      |
| chr28     | 10880657            | 2 | 36 | A:1            | T:0          |                   |      |
| chr28     | 10880785            | 2 | 38 | T:0.0263158    |              | A:0.973684        |      |
| chr28     | 10880789            | 2 | 38 | C:0.631579     |              | A:0.368421        |      |
| chr28     | 10881307            | 2 | 38 | A:0.0263158    |              | C:0.973684        |      |
| chr28     | 10881437            | 2 | 40 | A:0.975        | G:0.025      |                   |      |
| chr28     | 10881444            | 2 | 40 | C:0.3          | T:0.7        |                   |      |
| chr28     | 10881588            | 3 | 38 | CTTTT:0.973684 |              | C:0               | CTT: |
| 0.0263158 |                     |   |    |                |              |                   |      |
| chr28     | 10881646            | 2 | 38 | C:0.736842     |              | T:0.263158        |      |
| chr28     | 10881792            | 2 | 36 | T:1            | G:0          |                   |      |
| chr28     | 10881808            | 2 | 36 | G:0.944444     |              | A:0.0555556       |      |
| chr28     | 10881849            | 2 | 38 | A:0.973684     |              | G:0.0263158       |      |
| chr28     | 10882110            | 2 | 38 | C:1            | CCTCT:0      |                   |      |
| chr28     | 10882163            | 2 | 38 | C:0.973684     |              | T:0.0263158       |      |
| chr28     | 10882434            | 2 | 40 | G:0.025        | C:0.975      |                   |      |
| chr28     | 10882688            | 2 | 40 | TG:0.075       | T:0.925      |                   |      |
| chr28     | 10882760            | 2 | 38 | C:0.921053     |              | A:0.0789474       |      |
| chr28     | 10882808            | 2 | 38 | A:0.868421     |              | G:0.131579        |      |
| chr28     | 10882976            | 2 | 38 | C:0.421053     |              | G:0.578947        |      |
| chr28     | 10883014            | 2 | 40 | C:0.875        | T:0.125      |                   |      |
| chr28     | 10883028            | 2 | 40 | A:0.15         | G:0.85       |                   |      |

|        |              |   |    |                       |                 |             |
|--------|--------------|---|----|-----------------------|-----------------|-------------|
| chr28  | 10883125     | 2 | 40 | T:0.875               | C:0.125         |             |
| chr28  | 10883240     | 2 | 36 | TA:0.861111           |                 | T:0.138889  |
| chr28  | 10883368     | 2 | 40 | T:0.125               | G:0.875         |             |
| chr28  | 10883680     | 2 | 40 | T:0.125               | C:0.875         |             |
| chr28  | 10884142     | 2 | 40 | A:0.225               | AT:0.775        |             |
| chr28  | 10884231     | 2 | 40 | A:0.3                 | T:0.7           |             |
| chr28  | 10884436     | 2 | 38 | A:0.789474            |                 | G:0.210526  |
| chr28  | 10884509     | 2 | 36 | G:1                   | C:0             |             |
| chr28  | 10884565     | 2 | 34 | T:1                   | G:0             |             |
| chr28  | 10884599     | 4 | 38 | TAAA:0.236842         |                 | T:0.0789474 |
| TA:0.5 | TAA:0.184211 |   |    |                       |                 |             |
| chr28  | 10885261     | 2 | 36 | T:0.305556            |                 | C:0.694444  |
| chr28  | 10885283     | 2 | 38 | G:0.236842            |                 | A:0.763158  |
| chr28  | 10885292     | 2 | 38 | G:0.894737            |                 | A:0.105263  |
| chr28  | 10885993     | 2 | 38 | T:0.263158            |                 | A:0.736842  |
| chr28  | 10886462     | 2 | 38 | TAA:0.0263158         |                 | T:0.973684  |
| chr28  | 10886477     | 2 | 38 | C:0.736842            |                 | A:0.263158  |
| chr28  | 10886537     | 2 | 40 | G:1                   | A:0             |             |
| chr28  | 10887200     | 2 | 36 | G:0.722222            |                 | A:0.277778  |
| chr28  | 10887440     | 2 | 36 | AT:0.305556           |                 | A:0.694444  |
| chr28  | 10887451     | 2 | 34 | TG:0.970588           |                 | T:0.0294118 |
| chr28  | 10887501     | 2 | 40 | C:0.95                | CT:0.05         |             |
| chr28  | 10887503     | 2 | 40 | T:0.25                | TTA:0.75        |             |
| chr28  | 10887504     | 2 | 40 | TTTTTTTATTTTTTA:0.975 |                 | T:0.025     |
| chr28  | 10887511     | 2 | 40 | A:0.3                 | AT:0.7          |             |
| chr28  | 10887512     | 2 | 40 | TTTTTTAA:0.95         |                 | T:0.05      |
| chr28  | 10887519     | 2 | 40 | A:0.3                 | T:0.7           |             |
| chr28  | 10887526     | 2 | 40 | T:0.975               | TA:0.025        |             |
| chr28  | 10887540     | 2 | 40 | G:0.775               | GT:0.225        |             |
| chr28  | 10887541     | 3 | 40 | C:0.025               | A:0.75          | CA:0.225    |
| chr28  | 10887552     | 2 | 40 | G:0.325               | GAGAGAGGC:0.675 |             |
| chr28  | 10887723     | 2 | 38 | C:1                   | A:0             |             |
| chr28  | 10887724     | 2 | 38 | C:0.263158            |                 | G:0.736842  |
| chr28  | 10887906     | 2 | 40 | T:0.2                 | A:0.8           |             |
| chr28  | 10887991     | 2 | 40 | G:0.975               | A:0.025         |             |
| chr28  | 10888001     | 2 | 40 | G:0.95                | A:0.05          |             |
| chr28  | 10888546     | 2 | 40 | A:0.275               | G:0.725         |             |
| chr28  | 10888643     | 2 | 40 | T:0.275               | C:0.725         |             |
| chr28  | 10888752     | 2 | 40 | C:0.3                 | T:0.7           |             |
| chr28  | 10888856     | 2 | 40 | A:0.275               | G:0.725         |             |
| chr28  | 10888873     | 2 | 40 | A:0.225               | T:0.775         |             |
| chr28  | 10888979     | 2 | 38 | A:0.263158            |                 | G:0.736842  |
| chr28  | 10889159     | 2 | 40 | A:0.3                 | G:0.7           |             |
| chr28  | 10889208     | 2 | 40 | G:0.975               | GTTATT:0.025    |             |
| chr28  | 10889388     | 2 | 38 | G:0.894737            |                 | C:0.105263  |
| chr28  | 10889581     | 2 | 36 | TTTTA:0.805556        |                 | T:0.194444  |
| chr28  | 10889598     | 2 | 34 | A:0.764706            |                 | G:0.235294  |
| chr28  | 10889965     | 2 | 34 | A:0.294118            |                 | AT:0.705882 |
| chr28  | 10890035     | 2 | 36 | C:0.861111            |                 | T:0.138889  |
| chr28  | 10890255     | 2 | 36 | G:0.305556            |                 | A:0.694444  |
| chr28  | 10890290     | 2 | 36 | A:0.694444            |                 | G:0.305556  |
| chr28  | 10890352     | 2 | 38 | G:0.868421            |                 | C:0.131579  |
| chr28  | 10890492     | 2 | 36 | G:0.638889            |                 | A:0.361111  |
| chr28  | 10890598     | 3 | 34 | T:0.529412            |                 | TG:0.441176 |

TGG:0.0294118  
 chr28 10890840 2 10 TGGCGGCGGCGGC:0.1 T:0.9  
 chr28 10891262 2 36 C:0.0277778 CA:0.972222  
 chr28 10891267 2 36 G:0.972222 C:0.0277778  
 chr28 10891415 2 36 G:0.388889 A:0.611111  
 chr28 10891631 2 36 C:0 G:1  
 chr28 10892104 2 38 G:0.947368 C:0.0526316  
 chr28 10892388 2 40 A:1 C:0  
 chr28 10892613 3 40 C:0.5 CT:0.2 CTTT:0.3  
 chr28 10893265 2 36 T:0.944444 A:0.0555556  
 chr28 10893391 2 40 CT:0.95 C:0.05  
 chr28 10893402 2 40 C:0.725 T:0.275  
 chr28 10893436 2 38 G:1 A:0  
 chr28 10894068 2 40 C:0.65 T:0.35  
 chr28 10894272 2 34 A:0.882353 AT:0.117647  
 chr28 10894438 2 40 A:0.95 T:0.05  
 chr28 10894539 2 34 C:0.529412 CAG:0.470588  
 chr28 10894647 2 38 C:0.473684 A:0.526316  
 chr28 10894755 2 40 G:0.975 GT:0.025  
 chr28 10894864 2 38 A:1 T:0  
 chr28 10894994 2 38 C:1 T:0  
 chr28 10895137 3 40 TATTG:0.4 T:0.05  
 TATTGATTG:0.55  
 chr28 10895171 2 40 GACACAC:0.325 G:0.675  
 chr28 10895298 2 32 G:1 C:0  
 chr28 10895383 2 40 GTTTGTT:0.95 G:0.05  
 chr28 10895443 2 40 G:1 A:0  
 chr28 10895844 2 38 G:1 A:0  
 chr28 10896146 2 38 T:0.421053 A:0.578947  
 chr28 10896255 2 32 G:0.96875 C:0.03125  
 chr28 10896385 2 40 TA:0.6 T:0.4  
 chr28 10897336 2 38 G:0 GC:1  
 chr28 10897637 2 38 A:0 C:1  
 chr28 10897638 2 38 A:0 T:1  
 chr28 10897678 2 40 A:0 T:1  
 chr28 10897680 2 40 G:0 A:1  
 chr28 10898145 2 40 T:0.025 G:0.975  
 chr28 10899759 2 38 G:0.947368 A:0.0526316  
 chr28 10900002 2 40 A:0.425 G:0.575  
 chr28 10901102 2 36 A:1 AT:0  
 chr28 10901787 2 38 AGGATTTTCACTGT:1 A:0  
 chr28 10902365 4 40 T:0.225 TTC:0.625 TTCTC:  
 0.05 TTCTCTC:0.1  
 chr28 10902471 3 38 CT:0.631579 C:0.236842  
 CTT:0.131579  
 chr28 10902624 2 38 G:1 A:0  
 chr28 10902631 2 38 GGA:1 G:0  
 chr28 10903125 2 40 T:0.95 C:0.05  
 chr28 10905054 2 38 A:0.973684 G:0.0263158  
 chr28 10905636 2 38 C:0.789474 CT:0.210526  
 chr28 10905757 2 34 C:0.294118 CT:0.705882  
 chr28 10906371 2 38 C:1 T:0  
 chr28 10907929 3 38 C:0.447368 CT:0.552632  
 CTT:0

|                                                 |            |    |                             |                 |
|-------------------------------------------------|------------|----|-----------------------------|-----------------|
| chr28                                           | 10908479 2 | 36 | G:0.222222                  | GT:0.777778     |
| chr28                                           | 10909005 2 | 34 | G:0.470588                  | A:0.529412      |
| chr28                                           | 10909089 2 | 40 | C:1 T:0                     |                 |
| chr28                                           | 10909106 2 | 38 | T:0.447368                  | TAAA:0.552632   |
| chr28                                           | 10909107 4 | 38 | T:0.315789                  | A:0.552632      |
| TAAA:0.131579 TTAA:0                            |            |    |                             |                 |
| chr28                                           | 10909525 2 | 36 | C:0.972222                  | CAGAG:0.0277778 |
| chr28                                           | 10909952 6 | 40 | T:0.125 TATAG:0             | TATAGATAG:0.05  |
| TATAGATAGATAG:0.65 TATAGATAGATAGATAG:0.125      |            |    |                             |                 |
| TATAGATAGATAGATAGATAG:0.05                      |            |    |                             |                 |
| chr28                                           | 10909963 2 | 40 | A:0.975 AGATAGATAGATG:0.025 |                 |
| chr28                                           | 10911677 2 | 40 | CT:1 C:0                    |                 |
| chr28                                           | 10912047 2 | 36 | T:0.944444                  | A:0.0555556     |
| chr28                                           | 10912950 2 | 40 | A:0.925 G:0.075             |                 |
| chr28                                           | 10913896 2 | 38 | TG:1 T:0                    |                 |
| chr28                                           | 10914811 2 | 32 | CTA:0.46875                 | C:0.53125       |
| chr28                                           | 10914827 5 | 38 | CAAATAAAT:0.184211          | C:              |
| 0.263158 CAAAT:0.0789474 CAAATAAATAAAT:0.394737 |            |    |                             |                 |
| CAAATAAATAAATAAAT:0.0789474                     |            |    |                             |                 |
| chr28                                           | 10915294 2 | 40 | C:1 T:0                     |                 |
| chr28                                           | 10915752 2 | 36 | T:0.666667                  | A:0.333333      |
| chr28                                           | 10915858 2 | 38 | C:0.973684                  | T:0.0263158     |
| chr28                                           | 10916032 3 | 32 | C:0.375 CT:0.375 CTTT:0.25  |                 |
| chr28                                           | 10916305 2 | 38 | T:0.421053                  | C:0.578947      |
| chr28                                           | 10916365 2 | 40 | C:0.425 T:0.575             |                 |
| chr28                                           | 10917379 2 | 34 | C:0.176471                  | CT:0.823529     |
| chr28                                           | 10917399 2 | 32 | A:0.6875 C:0.3125           |                 |
| chr28                                           | 10918597 2 | 40 | T:1 C:0                     |                 |
| chr28                                           | 10918758 2 | 40 | CTAAG:1 C:0                 |                 |
| chr28                                           | 10918832 2 | 40 | C:0.65 T:0.35               |                 |
| chr28                                           | 10920076 2 | 38 | C:1 G:0                     |                 |
| chr28                                           | 10924839 2 | 40 | G:0.725 A:0.275             |                 |
| chr28                                           | 10924859 2 | 40 | T:0.775 A:0.225             |                 |
| chr28                                           | 10925321 2 | 34 | GC:0.882353                 | G:0.117647      |
| chr28                                           | 10925332 2 | 36 | CCA:0.888889                | C:0.111111      |
| chr28                                           | 10925333 2 | 34 | CA:0.735294                 | C:0.264706      |
| chr28                                           | 10925638 2 | 40 | C:0.925 T:0.075             |                 |
| chr28                                           | 10925699 2 | 36 | TC:1 T:0                    |                 |
| chr28                                           | 10926072 2 | 38 | T:0.447368                  | C:0.552632      |
| chr28                                           | 10926654 2 | 38 | A:0.473684                  | G:0.526316      |
| chr28                                           | 10926698 2 | 36 | TA:0.777778                 | T:0.222222      |
| chr28                                           | 10927281 2 | 38 | C:0.315789                  | T:0.684211      |
| chr28                                           | 10927702 2 | 40 | C:1 T:0                     |                 |
| chr28                                           | 10927966 2 | 38 | T:0.315789                  | C:0.684211      |
| chr28                                           | 10928296 4 | 40 | T:0.075 TA:0.4              | TAA:0.4 TAAA:   |
| 0.125                                           |            |    |                             |                 |
| chr28                                           | 10928307 2 | 40 | A:0.975 AAC:0.025           |                 |
| chr28                                           | 10929538 2 | 38 | T:0.631579                  | C:0.368421      |
| chr28                                           | 10929724 2 | 40 | G:0.975 A:0.025             |                 |
| chr28                                           | 10930563 2 | 30 | G:0.933333                  | A:0.0666667     |
| chr28                                           | 10930732 2 | 18 | G:0.388889                  | C:0.611111      |
| chr28                                           | 10931128 2 | 28 | CG:0.392857                 | C:0.607143      |
| chr28                                           | 10931223 2 | 36 | T:0.222222                  | C:0.777778      |
| chr28                                           | 10931289 2 | 34 | A:0.970588                  | G:0.0294118     |

|                                 |            |    |                          |                  |
|---------------------------------|------------|----|--------------------------|------------------|
| chr28                           | 10931588 2 | 38 | G:0.421053               | C:0.578947       |
| chr28                           | 10931590 2 | 36 | G:0.5 C:0.5              |                  |
| chr28                           | 10931625 2 | 38 | T:0.447368               | TA:0.552632      |
| chr28                           | 10931626 2 | 38 | T:0.447368               | A:0.552632       |
| chr28                           | 10931741 2 | 40 | A:0.55 C:0.45            |                  |
| chr28                           | 10931801 2 | 40 | G:1 C:0                  |                  |
| chr28                           | 10931842 2 | 38 | C:0.526316               | CAG:0.473684     |
| chr28                           | 10932002 3 | 40 | TAAAAAAAAAAAAACATA:0.525 | T:0.05           |
| TAAAAAAAAAAAAACATA:0.425        |            |    |                          |                  |
| chr28                           | 10932018 2 | 40 | TA:0.45 T:0.55           |                  |
| chr28                           | 10932229 3 | 28 | CTGTG:0.535714           | C:0.428571       |
| CTG:0.0357143                   |            |    |                          |                  |
| chr28                           | 10932540 2 | 38 | C:0.421053               | A:0.578947       |
| chr28                           | 10932838 2 | 40 | C:1 T:0                  |                  |
| chr28                           | 10933289 2 | 40 | A:0.6 G:0.4              |                  |
| chr28                           | 10933798 2 | 38 | C:0.868421               | CA:0.131579      |
| chr28                           | 10933842 2 | 36 | T:1 A:0                  |                  |
| chr28                           | 10934253 2 | 40 | T:0.5 C:0.5              |                  |
| chr28                           | 10934424 2 | 40 | T:0.325 C:0.675          |                  |
| chr28                           | 10934487 2 | 38 | A:0.342105               | T:0.657895       |
| chr28                           | 10934765 2 | 38 | T:0.526316               | C:0.473684       |
| chr28                           | 10934913 2 | 38 | A:1 G:0                  |                  |
| chr28                           | 10934991 2 | 32 | TA:0.40625               | T:0.59375        |
| chr28                           | 10934992 2 | 32 | A:1 T:0                  |                  |
| chr28                           | 10935306 2 | 40 | T:0.65 A:0.35            |                  |
| chr28                           | 10935724 2 | 40 | T:0.925 C:0.075          |                  |
| chr28                           | 10935759 3 | 40 | TA:0.65 T:0.325          | TAA:0.025        |
| chr28                           | 10935844 2 | 40 | C:0.975 T:0.025          |                  |
| chr28                           | 10936650 2 | 34 | C:0.676471               | T:0.323529       |
| chr28                           | 10936790 2 | 38 | A:0.526316               | ACT:0.473684     |
| chr28                           | 10936918 2 | 36 | G:0.972222               | A:0.0277778      |
| chr28                           | 10937108 2 | 36 | C:0.305556               | T:0.694444       |
| chr28                           | 10937631 2 | 34 | T:0.529412               | C:0.470588       |
| chr28                           | 10937655 2 | 36 | G:0.638889               | A:0.361111       |
| chr28                           | 10937749 2 | 38 | C:0.947368               | T:0.0526316      |
| chr28                           | 10937773 2 | 38 | C:0.947368               | CATTT:0.0526316  |
| chr28                           | 10937780 3 | 38 | T:0.342105               | TTTTTTTTTAA:     |
| 0.578947 TTTTTTTTTTAA:0.0789474 |            |    |                          |                  |
| chr28                           | 10937947 2 | 38 | G:0.526316               | A:0.473684       |
| chr28                           | 10938016 2 | 38 | T:0.894737               | C:0.105263       |
| chr28                           | 10938156 2 | 34 | G:1 A:0                  |                  |
| chr28                           | 10938218 2 | 38 | CTCTCTCCCT:0.789474      | C:               |
| 0.210526                        |            |    |                          |                  |
| chr28                           | 10938220 2 | 38 | CTCTCCCT:0.894737        | C:               |
| 0.105263                        |            |    |                          |                  |
| chr28                           | 10938222 3 | 38 | CTCCCT:0.763158          | CTCCCT:0.236842  |
| C:0                             |            |    |                          |                  |
| chr28                           | 10938223 2 | 40 | T:0.9 TC:0.1             |                  |
| chr28                           | 10938226 2 | 38 | C:0.657895               | T:0.342105       |
| chr28                           | 10938228 2 | 38 | T:0.578947               | TC:0.421053      |
| chr28                           | 10938232 2 | 38 | C:0.631579               | G:0.368421       |
| chr28                           | 10938234 2 | 38 | G:1 C:0                  |                  |
| chr28                           | 10938284 2 | 38 | G:0.947368               | GAAAGA:0.0526316 |
| chr28                           | 10938529 4 | 40 |                          |                  |



|       |                                 |    |                           |                   |
|-------|---------------------------------|----|---------------------------|-------------------|
| chr28 | 10951080 2                      | 36 | C:0.75                    | A:0.25            |
| chr28 | 10951082 2                      | 36 | G:0.75                    | A:0.25            |
| chr28 | 10951248 2                      | 38 | A:1                       | G:0               |
| chr28 | 10951424 2                      | 40 | ACCCTGCATGGTTTAC:1        | A:0               |
| chr28 | 10951510 2                      | 36 | C:0.694444                | G:0.305556        |
| chr28 | 10952305 2                      | 38 | A:1                       | C:0               |
| chr28 | 10952502 3                      | 38 | A:0.657895                | C:0 G:            |
|       | 0.342105                        |    |                           |                   |
| chr28 | 10952514 2                      | 38 | A:1                       | G:0               |
| chr28 | 10952562 2                      | 38 | C:1                       | G:0               |
| chr28 | 10952625 2                      | 36 | G:1                       | C:0               |
| chr28 | 10952637 2                      | 34 | GTA:0.676471              | G:0.323529        |
| chr28 | 10952639 2                      | 36 | A:1                       | G:0               |
| chr28 | 10952815 2                      | 40 | T:0.625                   | C:0.375           |
| chr28 | 10952979 2                      | 40 | A:0.675                   | G:0.325           |
| chr28 | 10953058 2                      | 38 | A:0.789474                | T:0.210526        |
| chr28 | 10953067 2                      | 40 | T:0.925                   | A:0.075           |
| chr28 | 10953068 2                      | 40 | T:0.775                   | A:0.225           |
| chr28 | 10953078 2                      | 38 | AAAAAT:1                  | A:0               |
| chr28 | 10953092 2                      | 40 | A:0.775                   | G:0.225           |
| chr28 | 10953185 2                      | 28 | C:0.785714                | CA:0.214286       |
| chr28 | 10953242 2                      | 30 | T:0.766667                | C:0.233333        |
| chr28 | 10953533 2                      | 26 | G:0.615385                | T:0.384615        |
| chr28 | 10953616 2                      | 26 | C:0.538462                | A:0.461538        |
| chr28 | 10953773 2                      | 38 | G:0.868421                | GAGTGTGGA:        |
|       | 0.131579                        |    |                           |                   |
| chr28 | 10953774 2                      | 38 | C:0.842105                |                   |
|       | CCACCCATGGCATAGCCAGCAT:0.157895 |    |                           |                   |
| chr28 | 10954058 2                      | 40 | C:0.675                   | T:0.325           |
| chr28 | 10954059 2                      | 40 | A:0.675                   | G:0.325           |
| chr28 | 10954098 2                      | 40 | C:0.25                    | CAGGGA:0.75       |
| chr28 | 10954143 2                      | 38 | T:0.736842                | A:0.263158        |
| chr28 | 10954226 2                      | 36 | T:0.777778                | TTTTTA:0.222222   |
| chr28 | 10954538 2                      | 38 | G:0.421053                | C:0.578947        |
| chr28 | 10954668 2                      | 38 | C:0.894737                | T:0.105263        |
| chr28 | 10954711 2                      | 38 | A:1                       | AATT:0            |
| chr28 | 10954733 2                      | 40 | C:0.975                   | T:0.025           |
| chr28 | 10954773 2                      | 40 | AGGCG:0                   | A:1               |
| chr28 | 10955057 2                      | 40 | T:0.65                    | C:0.35            |
| chr28 | 10955111 2                      | 38 | CACG:0.605263             | C:0.394737        |
| chr28 | 10955169 2                      | 40 | A:0.45                    | G:0.55            |
| chr28 | 10955289 2                      | 36 | G:0.0277778               | C:0.972222        |
| chr28 | 10955498 2                      | 38 | GAC:0.894737              | G:0.105263        |
| chr28 | 10955581 2                      | 40 | G:0.9                     | A:0.1             |
| chr28 | 10955860 2                      | 38 | G:0.684211                | T:0.315789        |
| chr28 | 10955862 2                      | 38 | A:0.684211                | G:0.315789        |
| chr28 | 10956211 2                      | 38 | A:0.631579                | C:0.368421        |
| chr28 | 10956220 2                      | 36 | C:0.75                    | T:0.25            |
| chr28 | 10956406 2                      | 40 | AGTGATTTTTTTTACCTTG:0.675 | A:0.325           |
| chr28 | 10956444 2                      | 40 | T:0.775                   | A:0.225           |
| chr28 | 10956472 3                      | 40 | C:0.7                     | CAG:0 CAGAGAG:0.3 |
| chr28 | 10956634 2                      | 36 | AT:0.638889               | A:0.361111        |
| chr28 | 10956653 2                      | 36 | A:0.722222                | T:0.277778        |
| chr28 | 10956654 2                      | 36 | A:0.722222                | T:0.277778        |



|                                                  |          |   |    |                                 |              |          |
|--------------------------------------------------|----------|---|----|---------------------------------|--------------|----------|
| chr28                                            | 10956764 | 2 | 38 | A:0.421053                      | AT:0.578947  |          |
| chr28                                            | 10956893 | 2 | 30 | G:0.766667                      | A:0.233333   |          |
| chr28                                            | 10956988 | 2 | 36 | A:0.361111                      | G:0.638889   |          |
| chr28                                            | 10957438 | 2 | 38 | G:0.842105                      | A:0.157895   |          |
| chr28                                            | 10957724 | 2 | 38 | T:0.710526                      | G:0.289474   |          |
| chr28                                            | 10957781 | 2 | 38 | C:0.763158                      | CT:0.236842  |          |
| chr28                                            | 10957792 | 2 | 36 | G:0.333333                      | T:0.666667   |          |
| chr28                                            | 10957793 | 2 | 38 | GAA:0.763158                    | G:0.236842   |          |
| chr28                                            | 10957794 | 2 | 36 | A:0.638889                      | G:0.361111   |          |
| chr28                                            | 10957804 | 2 | 38 | A:0.789474                      | T:0.210526   |          |
| chr28                                            | 10958111 | 2 | 40 | G:0.3                           | A:0.7        |          |
| chr28                                            | 10958233 | 2 | 40 | AT:0.6                          | A:0.4        |          |
| chr28                                            | 10958332 | 2 | 34 | T:0.676471                      | G:0.323529   |          |
| chr28                                            | 10958419 | 2 | 38 | C:0.763158                      | A:0.236842   |          |
| chr28                                            | 10958530 | 3 | 38 | CT:0.447368                     | C:0.263158   |          |
| CTT:0.289474                                     |          |   |    |                                 |              |          |
| chr28                                            | 10958549 | 3 | 28 | CTT:0.321429                    | C:0.214286   |          |
| CT:0.464286                                      |          |   |    |                                 |              |          |
| chr28                                            | 10958909 | 2 | 40 | GGAC:0.875                      | G:0.125      |          |
| chr28                                            | 10958913 | 2 | 40 | TCA:0.875                       | T:0.125      |          |
| chr28                                            | 10959445 | 2 | 38 | C:0.342105                      | T:0.657895   |          |
| chr28                                            | 10959761 | 2 | 36 | T:1                             | A:0          |          |
| chr28                                            | 10959870 | 2 | 38 | G:1                             | C:0          |          |
| chr28                                            | 10959990 | 2 | 36 | G:0.75                          | GAC:0.25     |          |
| chr28                                            | 10960491 | 2 | 36 | TA:0.361111                     | T:0.638889   |          |
| chr28                                            | 10960645 | 2 | 38 | TCTA:1                          | T:0          |          |
| chr28                                            | 10960661 | 2 | 38 | C:0.710526                      | T:0.289474   |          |
| chr28                                            | 10960664 | 2 | 38 | T:0.710526                      | C:0.289474   |          |
| chr28                                            | 10960683 | 2 | 32 | CT:0.4375                       | C:0.5625     |          |
| chr28                                            | 10960719 | 3 | 40 | C:0.525                         | CAG:0.225    | CAGAGAG: |
| 0.25                                             |          |   |    |                                 |              |          |
| chr28                                            | 10960739 | 2 | 40 | GGC:0.95                        | G:0.05       |          |
| chr28                                            | 10961047 | 2 | 40 | T:0.725                         | C:0.275      |          |
| chr28                                            | 10961328 | 2 | 40 | T:0.65                          |              |          |
| TTTTTTTTGTTTGTTTTTTTTTTTTACATCAATAAAATCTTAA:0.35 |          |   |    |                                 |              |          |
| chr28                                            | 10961337 | 2 | 30 | ACC:0.433333                    | A:0.566667   |          |
| chr28                                            | 10961571 | 2 | 32 | T:0.4375                        | G:0.5625     |          |
| chr28                                            | 10961978 | 2 | 38 | C:0.947368                      | T:0.0526316  |          |
| chr28                                            | 10962777 | 2 | 32 | T:0.59375                       | C:0.40625    |          |
| chr28                                            | 10962807 | 2 | 38 | CGATCCTGGAGACCCGGGATCG:0.763158 |              |          |
| C:0.236842                                       |          |   |    |                                 |              |          |
| chr28                                            | 10962928 | 2 | 38 | TTAAAAAAA:0.973684              | T:           |          |
| 0.0263158                                        |          |   |    |                                 |              |          |
| chr28                                            | 10962929 | 2 | 38 | T:0.894737                      | TA:0.105263  |          |
| chr28                                            | 10962938 | 2 | 38 | T:0.447368                      | TA:0.552632  |          |
| chr28                                            | 10962939 | 2 | 38 | A:1                             | AT:0         |          |
| chr28                                            | 10963007 | 2 | 38 | A:0.868421                      | G:0.131579   |          |
| chr28                                            | 10963122 | 2 | 36 | A:0.972222                      | G:0.0277778  |          |
| chr28                                            | 10963320 | 2 | 40 | CAA:0.75                        | C:0.25       |          |
| chr28                                            | 10963342 | 2 | 40 | G:0.475                         | C:0.525      |          |
| chr28                                            | 10963556 | 2 | 40 | C:0.675                         | CT:0.325     |          |
| chr28                                            | 10963558 | 2 | 40 | T:0.95                          | TTCTTTC:0.05 |          |
| chr28                                            | 10964557 | 2 | 36 | GC:0.638889                     | G:0.361111   |          |
| chr28                                            | 10964800 | 2 | 36 | C:0.666667                      | T:0.333333   |          |

|              |          |                 |            |                                    |          |                 |
|--------------|----------|-----------------|------------|------------------------------------|----------|-----------------|
| chr28        | 10964924 | 2               | 40         | T:0.975                            | C:0.025  |                 |
| chr28        | 10965013 | 2               | 34         | C:0.941176                         |          | CT:0.0588235    |
| chr28        | 10965016 | 2               | 36         | T:0.444444                         |          | TTTTTC:0.555556 |
| chr28        | 10965062 | 2               | 38         | C:0.263158                         |          | G:0.736842      |
| chr28        | 10965153 | 2               | 38         | G:1                                | A:0      |                 |
| chr28        | 10965483 | 2               | 34         | A:0.588235                         |          | ACC:0.411765    |
| chr28        | 10965485 | 2               | 38         | C:0.763158                         |          | CCT:0.236842    |
| chr28        | 10965491 | 2               | 36         | C:0.75                             | CCA:0.25 |                 |
| chr28        | 10965492 | 2               | 38         | A:0.763158                         |          | C:0.236842      |
| chr28        | 10965784 | 2               | 36         | AAGG:0.916667                      |          | A:0.0833333     |
| chr28        | 10966005 | 2               | 36         | A:0.916667                         |          | G:0.0833333     |
| chr28        | 10966282 | 2               | 24         | G:0.625                            | C:0.375  |                 |
| chr28        | 10966579 | 2               | 22         | G:0.0909091                        |          | A:0.909091      |
| chr28        | 10966622 | 2               | 32         | A:0.875                            | G:0.125  |                 |
| chr28        | 10966652 | 2               | 36         | G:0.888889                         |          | A:0.111111      |
| chr28        | 10966710 | 2               | 36         | T:0.888889                         |          | C:0.111111      |
| chr28        | 10966731 | 2               | 38         | G:0.894737                         |          | T:0.105263      |
| chr28        | 10966732 | 2               | 38         | A:0.894737                         |          | T:0.105263      |
| chr28        | 10966981 | 2               | 38         | G:0.394737                         |          | A:0.605263      |
| chr28        | 10967204 | 2               | 38         | G:0.947368                         |          | A:0.0526316     |
| chr28        | 10967625 | 2               | 40         | C:0.525                            | T:0.475  |                 |
| chr28        | 10967688 | 2               | 40         | A:0.125                            | G:0.875  |                 |
| chr28        | 10967758 | 2               | 38         | G:0.578947                         |          | C:0.421053      |
| chr28        | 10967940 | 2               | 38         | T:0.473684                         |          | C:0.526316      |
| chr28        | 10967997 | 2               | 40         | T:0.175                            | C:0.825  |                 |
| chr28        | 10968267 | 2               | 40         | A:0.75                             | T:0.25   |                 |
| chr28        | 10968892 | 2               | 40         | A:1                                | G:0      |                 |
| chr28        | 10969042 | 2               | 36         | T:1                                | C:0      |                 |
| chr28        | 10969128 | 2               | 40         | G:0.475                            | A:0.525  |                 |
| chr28        | 10969133 | 2               | 40         | T:0.15                             | C:0.85   |                 |
| chr28        | 10969630 | 2               | 38         | A:0.394737                         |          | G:0.605263      |
| chr28        | 10969949 | 2               | 38         | A:0.421053                         |          | ATTGT:0.578947  |
| chr28        | 10969976 | 2               | 38         | G:0.631579                         |          | A:0.368421      |
| chr28        | 10970109 | 2               | 36         | G:0.805556                         |          | A:0.194444      |
| chr28        | 10970473 | 2               | 40         | T:0.2                              | C:0.8    |                 |
| chr28        | 10970631 | 2               | 40         | T:0.375                            | A:0.625  |                 |
| chr28        | 10970698 | 2               | 38         | G:0.368421                         |          | A:0.631579      |
| chr28        | 10971002 | 2               | 36         | A:0.916667                         |          | C:0.0833333     |
| chr28        | 10971194 | 2               | 36         | CAG:0.388889                       |          | C:0.611111      |
| chr28        | 10971312 | 2               | 38         | C:0.973684                         |          | T:0.0263158     |
| chr28        | 10971398 | 2               | 38         | G:1                                | A:0      |                 |
| chr28        | 10972104 | 2               | 36         | G:0.388889                         |          | A:0.611111      |
| chr28        | 10972185 | 4               | 38         | ATTT:0.0789474                     |          | AT:0.473684     |
| ATT:0.263158 |          |                 | A:0.184211 |                                    |          |                 |
| chr28        | 10972211 | 4               | 40         | CTTTATTTATTTATTTATTTATTTATTTATTTA: |          |                 |
| 0.25         | C:0.225  | CTTTATTTA:0.025 |            | CTTTATTTATTTA:0.5                  |          |                 |
| chr28        | 10972309 | 2               | 40         | T:0.425                            | C:0.575  |                 |
| chr28        | 10972350 | 2               | 38         | C:0.552632                         |          | T:0.447368      |
| chr28        | 10972364 | 2               | 36         | C:0.555556                         |          | T:0.444444      |
| chr28        | 10972567 | 2               | 38         | G:0.552632                         |          | A:0.447368      |
| chr28        | 10972570 | 2               | 38         | G:0.421053                         |          | T:0.578947      |
| chr28        | 10972747 | 2               | 38         | GCCATCTTTTTCTGAAAAAGC:0.684211     |          |                 |
| G:0.315789   |          |                 |            |                                    |          |                 |
| chr28        | 10972778 | 2               | 36         | T:0.222222                         |          | TC:0.777778     |

|                      |          |   |    |                             |                |
|----------------------|----------|---|----|-----------------------------|----------------|
| chr28                | 10972787 | 2 | 36 | G:0.222222                  | GTGGT:0.777778 |
| chr28                | 10973528 | 2 | 36 | G:0.527778                  | A:0.472222     |
| chr28                | 10973608 | 2 | 38 | A:0.631579                  | G:0.368421     |
| chr28                | 10973714 | 2 | 34 | G:0.764706                  | T:0.235294     |
| chr28                | 10973828 | 2 | 40 | C:0.725 T:0.275             |                |
| chr28                | 10974020 | 2 | 40 | C:0.425 A:0.575             |                |
| chr28                | 10974066 | 2 | 38 | C:0.421053                  | T:0.578947     |
| chr28                | 10974133 | 2 | 38 | C:0.842105                  | T:0.157895     |
| chr28                | 10974294 | 2 | 38 | C:0.631579                  | T:0.368421     |
| chr28                | 10974322 | 2 | 38 | C:0.605263                  | T:0.394737     |
| chr28                | 10974417 | 2 | 38 | G:1 A:0                     |                |
| chr28                | 10974622 | 2 | 40 | T:0.4 TC:0.6                |                |
| chr28                | 10974634 | 2 | 40 | T:0.4 C:0.6                 |                |
| chr28                | 10974958 | 2 | 40 | T:0.475 TTTC:0.525          |                |
| chr28                | 10975024 | 3 | 38 | GTTT:0.552632 G:0.236842    |                |
| GT:0.210526          |          |   |    |                             |                |
| chr28                | 10975261 | 2 | 38 | G:1 A:0                     |                |
| chr28                | 10975398 | 2 | 36 | T:0.555556 C:0.444444       |                |
| chr28                | 10975516 | 2 | 40 | A:0.475 G:0.525             |                |
| chr28                | 10975656 | 2 | 40 | G:0.55 A:0.45               |                |
| chr28                | 10975693 | 2 | 40 | AT:0.975 A:0.025            |                |
| chr28                | 10975698 | 2 | 40 | T:0.65 TA:0.35              |                |
| chr28                | 10975702 | 4 | 40 | TAA:0.35 T:0.375 AAA:0.025  |                |
| TA:0.25              |          |   |    |                             |                |
| chr28                | 10975704 | 2 | 40 | A:0.875 T:0.125             |                |
| chr28                | 10975763 | 2 | 36 | G:0.833333 T:0.166667       |                |
| chr28                | 10976105 | 2 | 20 | GA:0 G:1                    |                |
| chr28                | 10976177 | 2 | 32 | TTATG:0.84375 T:0.15625     |                |
| chr28                | 10976274 | 2 | 38 | TC:0.5 T:0.5                |                |
| chr28                | 10976373 | 2 | 34 | C:0.617647 T:0.382353       |                |
| chr28                | 10976533 | 2 | 22 | C:0.863636 CAT:0.136364     |                |
| chr28                | 10976599 | 2 | 36 | G:0.416667 C:0.583333       |                |
| chr28                | 10976600 | 2 | 36 | A:0.416667 T:0.583333       |                |
| chr28                | 10976984 | 2 | 38 | T:0.0789474 C:0.921053      |                |
| chr28                | 10977233 | 3 | 38 | C:0.578947 CAGAGAG:0.315789 |                |
| CAGAGAGAGAG:0.105263 |          |   |    |                             |                |
| chr28                | 10977288 | 2 | 38 | T:0.473684 C:0.526316       |                |
| chr28                | 10977367 | 2 | 40 | G:0.825 A:0.175             |                |
| chr28                | 10977383 | 2 | 36 | CA:1 C:0                    |                |
| chr28                | 10977384 | 2 | 38 | A:0.5 G:0.5                 |                |
| chr28                | 10977394 | 2 | 38 | T:0.5 A:0.5                 |                |
| chr28                | 10977396 | 2 | 38 | T:0.5 A:0.5                 |                |
| chr28                | 10977449 | 2 | 30 | CGACA:0.566667 C:0.433333   |                |
| chr28                | 10977452 | 3 | 34 | CAG:0.823529 C:0.0294118    |                |
| GAG:0.147059         |          |   |    |                             |                |
| chr28                | 10977531 | 2 | 30 | CATG:0.4 C:0.6              |                |
| chr28                | 10977593 | 2 | 36 | T:0.527778 C:0.472222       |                |
| chr28                | 10978165 | 3 | 40 | T:0.175 C:0.425 G:0.4       |                |
| chr28                | 10978203 | 2 | 40 | G:0.525 T:0.475             |                |
| chr28                | 10978372 | 2 | 40 | G:1 A:0                     |                |
| chr28                | 10978381 | 2 | 40 | A:1 C:0                     |                |
| chr28                | 10978429 | 2 | 38 | C:0.421053 CA:0.578947      |                |
| chr28                | 10978430 | 2 | 38 | C:0.947368 T:0.0526316      |                |
| chr28                | 10978442 | 2 | 38 | G:0.421053 GGTA:0.578947    |                |

|                                                    |            |    |               |             |                |
|----------------------------------------------------|------------|----|---------------|-------------|----------------|
| chr28                                              | 10978513 2 | 40 | A:0.45        | C:0.55      |                |
| chr28                                              | 10978703 2 | 40 | A:0.4         | C:0.6       |                |
| chr28                                              | 10979470 2 | 38 | C:1           | T:0         |                |
| chr28                                              | 10979777 2 | 38 | G:0.368421    |             | GTCTT:0.631579 |
| chr28                                              | 10979849 2 | 40 | T:0.975       | A:0.025     |                |
| chr28                                              | 10979907 2 | 38 | G:0.842105    |             | A:0.157895     |
| chr28                                              | 10979981 2 | 38 | G:0.947368    |             | A:0.0526316    |
| chr28                                              | 10980312 2 | 38 | G:0.736842    |             | T:0.263158     |
| chr28                                              | 10980412 2 | 38 | T:0.552632    |             | TA:0.447368    |
| chr28                                              | 10980524 2 | 38 | A:0.157895    |             | G:0.842105     |
| chr28                                              | 10980567 2 | 38 | T:0.552632    |             | A:0.447368     |
| chr28                                              | 10980625 2 | 36 | T:0.166667    |             | C:0.833333     |
| chr28                                              | 10981037 2 | 38 | A:0.657895    |             | G:0.342105     |
| chr28                                              | 10981304 2 | 40 | T:0.2         | C:0.8       |                |
| chr28                                              | 10981413 2 | 38 | T:0.0789474   |             | C:0.921053     |
| chr28                                              | 10981744 2 | 38 | T:0.184211    |             | C:0.815789     |
| chr28                                              | 10981920 2 | 38 | C:0.973684    |             | T:0.0263158    |
| chr28                                              | 10982003 2 | 40 | A:0.6         | G:0.4       |                |
| chr28                                              | 10982720 2 | 40 | A:1           | T:0         |                |
| chr28                                              | 10983100 2 | 40 | G:0.6         | A:0.4       |                |
| chr28                                              | 10983107 2 | 40 | G:0.225       | A:0.775     |                |
| chr28                                              | 10983144 2 | 38 | C:0.710526    |             | CTTCT:0.289474 |
| chr28                                              | 10983198 3 | 40 | CAGAGAG:0.325 |             | C:0.35         |
| CAGAGAGAG:0.325                                    |            |    |               |             |                |
| chr28                                              | 10983293 2 | 32 | C:0.625       | A:0.375     |                |
| chr28                                              | 10983352 2 | 36 | CCTT:0.972222 |             | C:0.0277778    |
| chr28                                              | 10983401 2 | 38 | A:0.5         | G:0.5       |                |
| chr28                                              | 10983418 2 | 36 | T:0.527778    |             | G:0.472222     |
| chr28                                              | 10983603 2 | 36 | G:0.361111    |             | A:0.638889     |
| chr28                                              | 10983637 2 | 36 | T:0.416667    |             | C:0.583333     |
| chr28                                              | 10983774 2 | 40 | A:0.475       | AGTCC:0.525 |                |
| chr28                                              | 10983818 2 | 40 | G:0.95        | A:0.05      |                |
| chr28                                              | 10983977 2 | 40 | G:0.875       | A:0.125     |                |
| chr28                                              | 10984009 2 | 38 | G:0.657895    |             | A:0.342105     |
| chr28                                              | 10984411 2 | 40 | C:0.475       | T:0.525     |                |
| chr28                                              | 10984568 2 | 38 | C:0.631579    |             | A:0.368421     |
| chr28                                              | 10984869 2 | 36 | G:0.333333    |             | A:0.666667     |
| chr28                                              | 10984997 2 | 40 | T:0.35        | C:0.65      |                |
| chr28                                              | 10985087 2 | 40 | C:0.425       | T:0.575     |                |
| chr28                                              | 10985273 4 | 38 | CTG:0.263158  |             | C:0.315789     |
| CTGTG:0.0526316 CTGTGTGTGTGTGTGTGTGTGTGTG:0.368421 |            |    |               |             |                |
| chr28                                              | 10985285 2 | 40 | G:0.85        |             |                |
| GTGTGTGTGTGTGTGTGTGTGTGTGTGTGTGTGTGT:0.15          |            |    |               |             |                |
| chr28                                              | 10985313 2 | 40 | A:0.375       | G:0.625     |                |
| chr28                                              | 10985337 2 | 40 | A:0.375       | G:0.625     |                |
| chr28                                              | 10985486 2 | 38 | A:0.657895    |             | C:0.342105     |
| chr28                                              | 10985523 2 | 34 | T:0.323529    |             | C:0.676471     |
| chr28                                              | 10985564 2 | 34 | C:0.558824    |             | CT:0.441176    |
| chr28                                              | 10985604 2 | 38 | AT:0.578947   |             | A:0.421053     |
| chr28                                              | 10985656 2 | 38 | T:0.131579    |             | C:0.868421     |
| chr28                                              | 10985748 2 | 38 | C:0.605263    |             | CT:0.394737    |
| chr28                                              | 10985921 2 | 38 | A:0.157895    |             | AT:0.842105    |
| chr28                                              | 10986385 2 | 38 | C:0.578947    |             | T:0.421053     |
| chr28                                              | 10986427 2 | 36 | T:0.638889    |             | C:0.361111     |

|       |            |    |                   |             |
|-------|------------|----|-------------------|-------------|
| chr28 | 10986678 2 | 36 | T:0.527778        | G:0.472222  |
| chr28 | 10986718 2 | 36 | A:0.555556        | G:0.444444  |
| chr28 | 10986842 2 | 36 | G:0.611111        | A:0.388889  |
| chr28 | 10986885 2 | 36 | G:0.444444        | T:0.555556  |
| chr28 | 10987378 2 | 40 | C:0.375 A:0.625   |             |
| chr28 | 10987477 2 | 38 | T:0.605263        | A:0.394737  |
| chr28 | 10987505 2 | 36 | T:0.472222        | G:0.527778  |
| chr28 | 10987590 2 | 40 | T:0.375 C:0.625   |             |
| chr28 | 10987599 2 | 40 | C:0.375 G:0.625   |             |
| chr28 | 10987920 2 | 38 | A:0.605263        | G:0.394737  |
| chr28 | 10987986 2 | 34 | T:0.558824        | C:0.441176  |
| chr28 | 10988012 2 | 38 | C:0.947368        | T:0.0526316 |
| chr28 | 10988453 2 | 36 | C:0.416667        | CG:0.583333 |
| chr28 | 10988522 2 | 38 | C:0.868421        | T:0.131579  |
| chr28 | 10988580 2 | 38 | A:0.605263        | G:0.394737  |
| chr28 | 10988882 2 | 40 | C:0.65 T:0.35     |             |
| chr28 | 10988978 2 | 38 | CT:0.157895       | C:0.842105  |
| chr28 | 10989264 2 | 40 | C:0.85 T:0.15     |             |
| chr28 | 10989268 2 | 40 | C:0.85 T:0.15     |             |
| chr28 | 10989464 2 | 38 | A:0.921053        | C:0.0789474 |
| chr28 | 10989866 2 | 34 | C:0.529412        | A:0.470588  |
| chr28 | 10990280 2 | 36 | A:0.888889        | T:0.111111  |
| chr28 | 10990637 2 | 38 | T:0.921053        | G:0.0789474 |
| chr28 | 10990840 2 | 38 | A:0.684211        | G:0.315789  |
| chr28 | 10991115 2 | 40 | TTTC:0.95         | T:0.05      |
| chr28 | 10991142 3 | 40 | T:0.575 TA:0.15   | TAA:0.275   |
| chr28 | 10991340 2 | 38 | T:0.473684        | C:0.526316  |
| chr28 | 10991590 2 | 40 | G:0.95 A:0.05     |             |
| chr28 | 10991684 2 | 36 | A:0.611111        | T:0.388889  |
| chr28 | 10991696 2 | 36 | T:0.611111        | C:0.388889  |
| chr28 | 10991738 2 | 38 | A:0.605263        | G:0.394737  |
| chr28 | 10991766 2 | 38 | A:0.526316        | G:0.473684  |
| chr28 | 10991773 2 | 38 | G:0.526316        | A:0.473684  |
| chr28 | 10991800 2 | 34 | A:0.441176        | G:0.558824  |
| chr28 | 10991874 2 | 38 | A:0.605263        | C:0.394737  |
| chr28 | 10992336 2 | 36 | C:0.666667        | T:0.333333  |
| chr28 | 10992547 2 | 34 | G:0.676471        | A:0.323529  |
| chr28 | 10992571 2 | 36 | C:0.638889        | A:0.361111  |
| chr28 | 10992572 2 | 36 | CG:0.638889       | C:0.361111  |
| chr28 | 10992573 2 | 36 | G:0.888889        | C:0.111111  |
| chr28 | 10992700 2 | 38 | T:0.131579        | C:0.868421  |
| chr28 | 10992714 2 | 40 | C:0.525 T:0.475   |             |
| chr28 | 10992715 2 | 38 | G:0.578947        | A:0.421053  |
| chr28 | 10992822 2 | 38 | G:0.631579        | GC:0.368421 |
| chr28 | 10993329 2 | 40 | GC:0.85 G:0.15    |             |
| chr28 | 10993330 2 | 40 | CCCCAG:0.225      | C:0.775     |
| chr28 | 10993332 2 | 40 | C:0.925 CTG:0.075 |             |
| chr28 | 10993333 2 | 40 | CAG:0.925         | C:0.075     |
| chr28 | 10993335 2 | 40 | G:0.85 GC:0.15    |             |
| chr28 | 10993525 2 | 30 | A:1 G:0           |             |
| chr28 | 10993669 2 | 30 | A:0.966667        | G:0.0333333 |
| chr28 | 10993730 2 | 36 | G:1 GGTGT:0       |             |
| chr28 | 10993759 2 | 28 | GTA:0.821429      | G:0.178571  |
| chr28 | 10993761 2 | 28 | A:1 G:0           |             |

|       |                          |    |                        |          |                      |
|-------|--------------------------|----|------------------------|----------|----------------------|
| chr28 | 10993763 2               | 32 | A:1                    | G:0      |                      |
| chr28 | 10993946 2               | 36 | GA:0.472222            |          | G:0.527778           |
| chr28 | 10994209 2               | 38 | TA:0.5                 | T:0.5    |                      |
| chr28 | 10994309 2               | 34 | C:0.617647             |          | T:0.382353           |
| chr28 | 10994311 2               | 34 | A:0.617647             |          | G:0.382353           |
| chr28 | 10994906 2               | 36 | G:0.111111             |          | A:0.888889           |
| chr28 | 10995117 2               | 38 | G:1                    | A:0      |                      |
| chr28 | 10995247 2               | 38 | T:0.526316             |          | G:0.473684           |
| chr28 | 10995395 2               | 38 | C:0.0263158            |          | G:0.973684           |
| chr28 | 10995495 2               | 38 | A:0.526316             |          | G:0.473684           |
| chr28 | 10995595 2               | 36 | A:0.944444             |          | C:0.0555556          |
| chr28 | 10995777 2               | 32 | CTG:0.90625            |          | C:0.09375            |
| chr28 | 10996035 2               | 38 | G:0.894737             |          | C:0.105263           |
| chr28 | 10996211 2               | 38 | A:0.921053             |          | AG:0.0789474         |
| chr28 | 10996475 2               | 38 | G:1                    | A:0      |                      |
| chr28 | 10996540 2               | 36 | A:0.0277778            |          | T:0.972222           |
| chr28 | 10996665 2               | 38 | C:0.578947             |          | T:0.421053           |
| chr28 | 10996729 2               | 40 | C:0.55                 | T:0.45   |                      |
| chr28 | 10996829 2               | 36 | A:0.916667             |          | G:0.0833333          |
| chr28 | 10996877 6               | 40 | CGTGTGTGTGTGTGTGT:0.15 |          | C:0.3                |
|       | CGTGTGT:0.2              |    | CGTGTGTGT:0.15         |          | CGTGTGTGTGTGTGT:0.15 |
|       | CGTGTGTGTGTGTGTGTGT:0.05 |    |                        |          |                      |
| chr28 | 10996947 2               | 38 | A:0.605263             |          | G:0.394737           |
| chr28 | 10997231 2               | 38 | A:0.921053             |          | G:0.0789474          |
| chr28 | 10997649 2               | 40 | G:0.1                  | GT:0.9   |                      |
| chr28 | 10997759 2               | 40 | A:0.075                | G:0.925  |                      |
| chr28 | 10997837 2               | 38 | T:0.526316             |          | C:0.473684           |
| chr28 | 10997840 2               | 38 | GCC:0.526316           |          | G:0.473684           |
| chr28 | 10997871 2               | 40 | C:0.6                  | G:0.4    |                      |
| chr28 | 10997960 2               | 40 | GGCTCTCTCTCCCCT:0.1    |          | G:0.9                |
| chr28 | 10998658 2               | 38 | ATG:0.973684           |          | A:0.0263158          |
| chr28 | 10998674 2               | 38 | G:0.447368             |          | GT:0.552632          |
| chr28 | 10998675 3               | 40 | G:0.475                | GT:0.425 | GTGTGTGT:0.1         |
| chr28 | 10998719 2               | 32 | C:0.90625              |          | T:0.09375            |
| chr28 | 10998878 2               | 34 | A:0.617647             |          | G:0.382353           |
| chr28 | 10998898 2               | 32 | T:0.6875               | C:0.3125 |                      |
| chr28 | 10998904 2               | 32 | T:0.6875               | C:0.3125 |                      |
| chr28 | 10998976 2               | 34 | G:0.0294118            |          | C:0.970588           |
| chr28 | 10999062 2               | 26 | C:0.384615             |          | CG:0.615385          |
| chr28 | 10999116 2               | 20 | CGT:0.35               | C:0.65   |                      |
| chr28 | 10999539 2               | 16 | G:0                    | GT:1     |                      |
| chr28 | 11000448 2               | 38 | G:0.526316             |          | A:0.473684           |
| chr28 | 11000873 2               | 40 | G:0.9                  | T:0.1    |                      |
| chr28 | 11000897 2               | 40 | G:0.95                 | A:0.05   |                      |
| chr28 | 11001070 2               | 38 | G:1                    | T:0      |                      |
| chr28 | 11001281 2               | 38 | G:0.131579             |          | A:0.868421           |
| chr28 | 11001339 2               | 38 | A:0.131579             |          | G:0.868421           |
| chr28 | 11001408 2               | 40 | GTTCC:0.1              |          | G:0.9                |
| chr28 | 11001623 2               | 36 | T:1                    | C:0      |                      |
| chr28 | 11001813 2               | 38 | T:0.0526316            |          | C:0.947368           |
| chr28 | 11001908 2               | 40 | C:0.9                  | T:0.1    |                      |
| chr28 | 11001982 2               | 40 | C:0.875                | T:0.125  |                      |
| chr28 | 11002146 2               | 34 | A:1                    | AC:0     |                      |
| chr28 | 11002454 2               | 38 | AAACAAC:0.5            |          | A:0.5                |

|       |                                    |    |                      |                  |
|-------|------------------------------------|----|----------------------|------------------|
| chr28 | 11002457 2                         | 38 | C:0.631579           | T:0.368421       |
| chr28 | 11002463 2                         | 38 | C:0.5                | T:0.5            |
| chr28 | 11002469 2                         | 38 | CAACAACAAT:0.631579  | C:               |
|       | 0.368421                           |    |                      |                  |
| chr28 | 11003002 4                         | 38 | A:0.0526316          | AT:0.394737      |
|       | ATT:0.552632                       |    | ATTTT:0              |                  |
| chr28 | 11003098 2                         | 40 | A:0.975              |                  |
|       | AACTAAATTTTGCTTATTAATAAAATTTTAAAC: |    | 0.025                |                  |
| chr28 | 11003273 2                         | 38 | AAAAT:1              | A:0              |
| chr28 | 11003288 2                         | 38 | A:1                  | AT:0             |
| chr28 | 11003289 2                         | 38 | TAAA:0.894737        | T:0.105263       |
| chr28 | 11003290 2                         | 38 | A:1                  | AATT:0           |
| chr28 | 11003293 2                         | 38 | TA:0.894737          | T:0.105263       |
| chr28 | 11003294 2                         | 38 | A:0.973684           | T:0.0263158      |
| chr28 | 11003334 2                         | 38 | A:1                  | C:0              |
| chr28 | 11003363 2                         | 38 | A:0.921053           | G:0.0789474      |
| chr28 | 11003468 2                         | 40 | GTTTCTTTTCTTCC:0.975 | G:0.025          |
| chr28 | 11003555 2                         | 40 | T:0.425              | TCTA:0.575       |
| chr28 | 11003575 2                         | 40 | A:0.9                | G:0.1            |
| chr28 | 11003578 2                         | 40 | C:1                  | T:0              |
| chr28 | 11003603 2                         | 36 | C:0.805556           | CT:0.194444      |
| chr28 | 11003607 2                         | 38 | T:1                  | C:0              |
| chr28 | 11003633 3                         | 38 | C:0.131579           | CAGAGAG:0.868421 |
|       | CAGAGAGAGAG:0                      |    |                      |                  |
| chr28 | 11003635 2                         | 40 | G:1                  | GAGAGAA:0        |
| chr28 | 11003644 2                         | 38 | T:0.157895           | TGA:0.842105     |
| chr28 | 11003846 2                         | 28 | C:0.0714286          | CTT:0.928571     |
| chr28 | 11004025 2                         | 34 | G:0.970588           | A:0.0294118      |
| chr28 | 11004046 2                         | 36 | G:0.972222           | A:0.0277778      |
| chr28 | 11004192 2                         | 38 | C:0.894737           | T:0.105263       |
| chr28 | 11004311 2                         | 38 | G:0.105263           | A:0.894737       |
| chr28 | 11004606 2                         | 36 | A:0.972222           | G:0.0277778      |
| chr28 | 11004722 2                         | 38 | G:0.842105           | A:0.157895       |
| chr28 | 11004801 2                         | 36 | C:1                  | A:0              |
| chr28 | 11005123 2                         | 38 | T:0.0789474          | C:0.921053       |
| chr28 | 11005235 2                         | 36 | C:0.0555556          | T:0.944444       |
| chr28 | 11005298 2                         | 38 | A:0.921053           | G:0.0789474      |
| chr28 | 11005327 2                         | 40 | G:1                  | C:0              |
| chr28 | 11005435 2                         | 40 | T:0.925              | C:0.075          |
| chr28 | 11005509 2                         | 36 | G:1                  | A:0              |
| chr28 | 11005663 2                         | 38 | G:0.552632           | C:0.447368       |
| chr28 | 11005676 2                         | 38 | G:0.0526316          | A:0.947368       |
| chr28 | 11006028 2                         | 38 | T:0.894737           | C:0.105263       |
| chr28 | 11006142 2                         | 38 | C:0.131579           | T:0.868421       |
| chr28 | 11006203 2                         | 38 | T:0.131579           | C:0.868421       |
| chr28 | 11006223 4                         | 40 | C:0.1                | CTGAA:0.025      |
|       | CTGAATGAACGAA:0.875                |    | CTGAATGAACGAATGAA:0  |                  |
| chr28 | 11006246 2                         | 40 | G:0.125              | A:0.875          |
| chr28 | 11006397 2                         | 38 | C:0.921053           | CT:0.0789474     |
| chr28 | 11006726 2                         | 36 | T:0.0555556          | C:0.944444       |
| chr28 | 11006737 2                         | 38 | AC:0.684211          | A:0.315789       |
| chr28 | 11006739 2                         | 36 | C:0.416667           | T:0.583333       |
| chr28 | 11006741 2                         | 38 | C:0.684211           | T:0.315789       |
| chr28 | 11006750 2                         | 40 | G:0.125              | A:0.875          |

|                  |            |    |                 |                   |
|------------------|------------|----|-----------------|-------------------|
| chr28            | 11006751 2 | 40 | C:0.125 T:0.875 |                   |
| chr28            | 11006837 2 | 38 | A:0.684211      | C:0.315789        |
| chr28            | 11006936 2 | 36 | C:0.0555556     | T:0.944444        |
| chr28            | 11006979 2 | 38 | A:0.947368      | G:0.0526316       |
| chr28            | 11006991 2 | 38 | A:0.947368      | G:0.0526316       |
| chr28            | 11007002 2 | 38 | G:0.947368      | GGA:0.0526316     |
| chr28            | 11007058 2 | 40 | A:0.9 T:0.1     |                   |
| chr28            | 11007138 2 | 38 | C:0.973684      | T:0.0263158       |
| chr28            | 11007215 2 | 38 | T:0.0526316     | C:0.947368        |
| chr28            | 11007601 2 | 38 | A:0.921053      | C:0.0789474       |
| chr28            | 11007664 2 | 36 | A:0.944444      | T:0.0555556       |
| chr28            | 11007697 2 | 38 | G:0.921053      | T:0.0789474       |
| chr28            | 11007727 2 | 38 | AG:0.894737     | A:0.105263        |
| chr28            | 11007782 2 | 36 | A:0.944444      | G:0.0555556       |
| chr28            | 11007923 2 | 38 | C:0.0789474     | G:0.921053        |
| chr28            | 11008346 2 | 38 | T:0.0789474     | C:0.921053        |
| chr28            | 11008356 2 | 38 | G:0.0789474     | GC:0.921053       |
| chr28            | 11008376 2 | 38 | A:0.0789474     | G:0.921053        |
| chr28            | 11008391 2 | 38 | T:0.0789474     | A:0.921053        |
| chr28            | 11008404 2 | 38 | T:0.763158      | G:0.236842        |
| chr28            | 11008522 2 | 36 | A:0.0833333     | G:0.916667        |
| chr28            | 11008580 2 | 36 | G:0.0833333     | A:0.916667        |
| chr28            | 11008589 2 | 36 | A:0.0833333     | G:0.916667        |
| chr28            | 11008669 2 | 38 | AT:0.131579     | A:0.868421        |
| chr28            | 11008980 2 | 40 | A:0.85 G:0.15   |                   |
| chr28            | 11008999 2 | 40 | G:0.15 A:0.85   |                   |
| chr28            | 11009011 2 | 40 | AG:0.95 A:0.05  |                   |
| chr28            | 11009048 2 | 38 | T:0.921053      | C:0.0789474       |
| chr28            | 11009258 2 | 40 | G:0.9 A:0.1     |                   |
| chr28            | 11009314 2 | 38 | G:0.868421      | A:0.131579        |
| chr28            | 11009484 2 | 40 | G:0.1 C:0.9     |                   |
| chr28            | 11009729 2 | 40 | G:1 A:0         |                   |
| chr28            | 11009792 2 | 36 | T:0.111111      | C:0.888889        |
| chr28            | 11009928 2 | 40 | A:1 C:0         |                   |
| chr28            | 11010161 2 | 36 | A:0.111111      | G:0.888889        |
| chr28            | 11010227 2 | 30 | C:0.966667      | A:0.0333333       |
| chr28            | 11010228 2 | 32 | A:1 C:0         |                   |
| chr28            | 11010301 2 | 32 | G:0.03125       | C:0.96875         |
| chr28            | 11010623 2 | 36 | C:0.111111      | T:0.888889        |
| chr28            | 11010763 2 | 38 | A:0.894737      | G:0.105263        |
| chr28            | 11010769 2 | 38 | A:0.894737      | G:0.105263        |
| chr28            | 11010775 2 | 38 | AAG:1 A:0       |                   |
| chr28            | 11010793 2 | 38 | C:1 T:0         |                   |
| chr28            | 11010810 2 | 36 | C:0.916667      | CCTTGGG:0.0833333 |
| chr28            | 11010926 2 | 40 | T:0.875 C:0.125 |                   |
| chr28            | 11010949 2 | 40 | A:0.875 T:0.125 |                   |
| chr28            | 11011061 2 | 34 | C:1 T:0         |                   |
| chr28            | 11011219 2 | 40 | T:0.125 C:0.875 |                   |
| chr28            | 11011252 2 | 38 | G:0.789474      | A:0.210526        |
| chr28            | 11011267 2 | 38 | G:0.157895      | A:0.842105        |
| chr28            | 11011340 3 | 38 | TAAA:0.0526316  | T:0.868421        |
| TAAAAA:0.0789474 |            |    |                 |                   |
| chr28            | 11011350 2 | 38 | TAAAA:0.131579  | T:0.868421        |
| chr28            | 11011559 2 | 38 | G:0.131579      | A:0.868421        |



|                                      |          |   |    |              |                     |
|--------------------------------------|----------|---|----|--------------|---------------------|
| chr28                                | 11011876 | 2 | 32 | C:0.96875    | T:0.03125           |
| chr28                                | 11011927 | 2 | 38 | C:0.263158   | CCT:0.736842        |
| chr28                                | 11011978 | 3 | 38 | T:0.421053   | TA:0.210526         |
| TAA:0.368421                         |          |   |    |              |                     |
| chr28                                | 11012037 | 2 | 40 | A:0.225      | ATGTAGGCAGAGG:0.775 |
| chr28                                | 11012378 | 2 | 40 | A:0.875      | G:0.125             |
| chr28                                | 11012386 | 2 | 40 | A:0.875      | G:0.125             |
| chr28                                | 11012542 | 2 | 38 | G:0.921053   | C:0.0789474         |
| chr28                                | 11013044 | 2 | 36 | A:0.138889   | C:0.861111          |
| chr28                                | 11013094 | 2 | 34 | G:0.794118   | T:0.205882          |
| chr28                                | 11013431 | 2 | 32 | G:0.75       | T:0.25              |
| chr28                                | 11013511 | 2 | 34 | C:0.117647   | T:0.882353          |
| chr28                                | 11013592 | 2 | 28 | G:0.714286   | A:0.285714          |
| chr28                                | 11013647 | 2 | 26 | TTG:0.230769 | T:0.769231          |
| chr28                                | 11013660 | 2 | 26 | G:0.230769   | C:0.769231          |
| chr28                                | 11014025 | 2 | 34 | C:0.0882353  | G:0.911765          |
| chr28                                | 11014797 | 2 | 36 | A:0.916667   | G:0.0833333         |
| chr28                                | 11015379 | 2 | 38 | T:0.0789474  | C:0.921053          |
| chr28                                | 11015536 | 2 | 38 | C:1          | T:0                 |
| chr28                                | 11015724 | 2 | 36 | C:0.916667   | T:0.0833333         |
| chr28                                | 11015901 | 2 | 38 | A:0.973684   | T:0.0263158         |
| chr28                                | 11015942 | 4 | 38 | C:0.526316   | CAG:0.210526        |
| CAGAGAG:0.184211 CAGAGAGAG:0.0789474 |          |   |    |              |                     |
| chr28                                | 11015944 | 4 | 40 | C:0.25       | G:0.45              |
| CAGAGAGAGAG:0.2                      |          |   |    |              |                     |
| chr28                                | 11015946 | 2 | 38 | C:0.131579   | G:0.868421          |
| chr28                                | 11016331 | 2 | 36 | C:0.888889   | T:0.111111          |
| chr28                                | 11016384 | 2 | 36 | C:0.916667   | T:0.0833333         |
| chr28                                | 11016567 | 2 | 36 | C:1          | T:0                 |
| chr28                                | 11016701 | 2 | 30 | GGGT:0.6     | G:0.4               |
| chr28                                | 11016702 | 2 | 30 | GGT:0.466667 | G:0.533333          |
| chr28                                | 11017185 | 2 | 34 | T:0.970588   | C:0.0294118         |
| chr28                                | 11017239 | 2 | 40 | G:0.525      | A:0.475             |
| chr28                                | 11017242 | 2 | 40 | G:0.6        | A:0.4               |
| chr28                                | 11017398 | 2 | 38 | T:0.973684   | C:0.0263158         |
| chr28                                | 11017488 | 2 | 38 | C:0.473684   | G:0.526316          |
| chr28                                | 11017968 | 2 | 40 | C:0.7        | T:0.3               |
| chr28                                | 11018133 | 2 | 38 | C:0.605263   | T:0.394737          |
| chr28                                | 11018217 | 2 | 40 | C:0.975      | T:0.025             |
| chr28                                | 11018324 | 2 | 38 | GT:1         | G:0                 |
| chr28                                | 11018561 | 2 | 38 | C:0.815789   | T:0.184211          |
| chr28                                | 11018591 | 2 | 38 | C:0.973684   | T:0.0263158         |
| chr28                                | 11018792 | 2 | 34 | A:0.352941   | C:0.647059          |
| chr28                                | 11018807 | 3 | 40 | TTTTA:0.75   | T:0.1               |
| TTTTATTTA:0.15                       |          |   |    |              |                     |
| chr28                                | 11018811 | 2 | 40 | AT:0.975     | A:0.025             |
| chr28                                | 11019252 | 2 | 40 | G:1          | A:0                 |
| chr28                                | 11019519 | 2 | 38 | A:0.342105   | G:0.657895          |
| chr28                                | 11019735 | 2 | 40 | C:0.05       | T:0.95              |
| chr28                                | 11020123 | 2 | 38 | G:0.789474   | A:0.210526          |
| chr28                                | 11020179 | 2 | 38 | T:0.657895   | C:0.342105          |
| chr28                                | 11020202 | 2 | 38 | GT:0.605263  | G:0.394737          |
| chr28                                | 11020349 | 2 | 34 | G:0.382353   | GT:0.617647         |
| chr28                                | 11020376 | 2 | 32 | C:0.75       | T:0.25              |

|       |            |    |                   |             |
|-------|------------|----|-------------------|-------------|
| chr28 | 11020781 2 | 32 | G:0.9375 A:0.0625 |             |
| chr28 | 11021012 2 | 40 | G:0.35 T:0.65     |             |
| chr28 | 11021017 2 | 40 | G:0.35 A:0.65     |             |
| chr28 | 11021468 2 | 38 | G:0.947368        | A:0.0526316 |
| chr28 | 11021915 2 | 38 | T:0.0789474       | G:0.921053  |
| chr28 | 11022233 2 | 38 | C:0.394737        | T:0.605263  |
| chr28 | 11022346 2 | 40 | A:0.675 G:0.325   |             |
| chr28 | 11022767 2 | 38 | A:1 G:0           |             |
| chr28 | 11023439 2 | 40 | G:0.675 T:0.325   |             |
| chr28 | 11023556 2 | 38 | C:0.763158        | T:0.236842  |
| chr28 | 11023666 2 | 38 | T:0.342105        | C:0.657895  |
| chr28 | 11023689 2 | 38 | T:0.342105        | C:0.657895  |
| chr28 | 11023703 2 | 38 | G:1 A:0           |             |
| chr28 | 11023783 2 | 38 | C:1 T:0           |             |
| chr28 | 11024066 2 | 38 | G:0.315789        | C:0.684211  |
| chr28 | 11024127 2 | 38 | T:0.947368        | A:0.0526316 |
| chr28 | 11024250 2 | 40 | T:0.625 G:0.375   |             |
| chr28 | 11024596 2 | 36 | C:1 T:0           |             |
| chr28 | 11024783 2 | 34 | A:0.382353        | AC:0.617647 |
| chr28 | 11025055 2 | 40 | C:1 T:0           |             |
| chr28 | 11025116 2 | 40 | T:0.6 G:0.4       |             |
| chr28 | 11025149 2 | 40 | CA:1 C:0          |             |
| chr28 | 11025326 2 | 40 | AG:0.675 A:0.325  |             |
| chr28 | 11025647 2 | 38 | G:0.789474        | A:0.210526  |
| chr28 | 11025713 2 | 40 | C:0.55 T:0.45     |             |
| chr28 | 11026043 2 | 40 | C:0.3 CTA:0.7     |             |
| chr28 | 11026217 2 | 36 | G:0.666667        | GC:0.333333 |
| chr28 | 11026485 2 | 36 | G:0.972222        | A:0.0277778 |
| chr28 | 11026700 2 | 38 | T:0.394737        | C:0.605263  |
| chr28 | 11026905 2 | 38 | G:0.973684        | A:0.0263158 |
| chr28 | 11027254 2 | 40 | G:0.55 A:0.45     |             |
| chr28 | 11027319 2 | 38 | C:1 T:0           |             |
| chr28 | 11027331 2 | 40 | TG:0.65 T:0.35    |             |
| chr28 | 11027534 2 | 38 | C:1 T:0           |             |
| chr28 | 11027768 2 | 38 | C:0.5 G:0.5       |             |
| chr28 | 11027837 2 | 36 | T:0.472222        | C:0.527778  |
| chr28 | 11028083 2 | 38 | T:0.710526        | G:0.289474  |
| chr28 | 11028211 2 | 40 | T:0.95 C:0.05     |             |
| chr28 | 11028231 2 | 40 | A:0.95 G:0.05     |             |
| chr28 | 11028232 2 | 40 | G:0.95 C:0.05     |             |
| chr28 | 11028451 2 | 40 | T:0.3 C:0.7       |             |
| chr28 | 11028454 2 | 40 | C:0.3 T:0.7       |             |
| chr28 | 11028918 2 | 40 | A:0.825 G:0.175   |             |
| chr28 | 11029112 2 | 36 | C:0.916667        | T:0.0833333 |
| chr28 | 11029411 2 | 40 | C:0.675 T:0.325   |             |
| chr28 | 11029473 2 | 38 | T:0.736842        | A:0.263158  |
| chr28 | 11029699 2 | 36 | C:0.694444        | T:0.305556  |
| chr28 | 11029723 2 | 36 | T:1 C:0           |             |
| chr28 | 11029790 2 | 20 | G:0.55 C:0.45     |             |
| chr28 | 11029936 2 | 32 | A:0.46875         | G:0.53125   |
| chr28 | 11030002 2 | 34 | A:0.470588        | G:0.529412  |
| chr28 | 11030312 2 | 38 | T:0.657895        | C:0.342105  |
| chr28 | 11030318 2 | 38 | G:1 T:0           |             |
| chr28 | 11030336 2 | 40 | A:1 G:0           |             |

|                                            |          |   |    |                 |               |
|--------------------------------------------|----------|---|----|-----------------|---------------|
| chr28                                      | 11030502 | 2 | 38 | C:0.631579      | CT:0.368421   |
| chr28                                      | 11030527 | 2 | 40 | C:1 T:0         |               |
| chr28                                      | 11030746 | 2 | 40 | T:0.325 C:0.675 |               |
| chr28                                      | 11031145 | 2 | 40 | G:0.425 A:0.575 |               |
| chr28                                      | 11031243 | 2 | 36 | A:0.638889      | G:0.361111    |
| chr28                                      | 11031297 | 2 | 38 | A:0.315789      | G:0.684211    |
| chr28                                      | 11031331 | 2 | 38 | C:0.368421      | T:0.631579    |
| chr28                                      | 11031449 | 2 | 40 | G:0.65 A:0.35   |               |
| chr28                                      | 11031494 | 2 | 40 | C:0.45 G:0.55   |               |
| chr28                                      | 11031525 | 2 | 38 | G:0.394737      | A:0.605263    |
| chr28                                      | 11031693 | 2 | 40 | G:1 A:0         |               |
| chr28                                      | 11031743 | 2 | 38 | A:0.526316      | C:0.473684    |
| chr28                                      | 11031794 | 2 | 40 | T:1 C:0         |               |
| chr28                                      | 11031909 | 2 | 36 | T:0.638889      | A:0.361111    |
| chr28                                      | 11031910 | 2 | 36 | C:0.638889      | T:0.361111    |
| chr28                                      | 11031948 | 2 | 38 | T:0.552632      | C:0.447368    |
| chr28                                      | 11031967 | 2 | 38 | C:0.421053      | T:0.578947    |
| chr28                                      | 11032012 | 2 | 40 | C:1 T:0         |               |
| chr28                                      | 11032121 | 2 | 40 | GTATAAGA:0.575  | G:0.425       |
| chr28                                      | 11032172 | 2 | 38 | T:0.421053      | C:0.578947    |
| chr28                                      | 11032245 | 2 | 40 | T:0.475 G:0.525 |               |
| chr28                                      | 11032317 | 2 | 24 | T:0.0833333     | A:0.916667    |
| chr28                                      | 11032686 | 2 | 36 | C:0.638889      | CTTT:0.361111 |
| chr28                                      | 11032702 | 4 | 40 | TTTTA:0.35      | T:0.075       |
| TTTTATTTA:0.325 TTTTATTTATTTATTTATTTA:0.25 |          |   |    |                 |               |
| chr28                                      | 11032740 | 2 | 36 | C:0.527778      | CAG:0.472222  |
| chr28                                      | 11032795 | 2 | 34 | G:0.588235      | A:0.411765    |
| chr28                                      | 11032824 | 2 | 38 | C:0.578947      | T:0.421053    |
| chr28                                      | 11032875 | 2 | 34 | T:0.617647      | C:0.382353    |
| chr28                                      | 11032919 | 2 | 40 |                 |               |
| TCTTTATCTAGTATGATCTCTAGACACTTTCTTTGC:1 T:0 |          |   |    |                 |               |
| chr28                                      | 11032957 | 2 | 40 | T:1 C:0         |               |
| chr28                                      | 11033126 | 2 | 38 | C:0.526316      | T:0.473684    |
| chr28                                      | 11033139 | 2 | 38 | G:0.526316      | A:0.473684    |
| chr28                                      | 11033239 | 2 | 40 | A:1 C:0         |               |
| chr28                                      | 11033276 | 2 | 40 | T:0.7 C:0.3     |               |
| chr28                                      | 11033358 | 2 | 38 | G:0.973684      | A:0.0263158   |
| chr28                                      | 11033557 | 2 | 40 | C:0.825 T:0.175 |               |
| chr28                                      | 11033749 | 2 | 40 | T:0.575 G:0.425 |               |
| chr28                                      | 11033753 | 2 | 40 | T:0.575 C:0.425 |               |
| chr28                                      | 11034008 | 2 | 38 | C:0.5 T:0.5     |               |
| chr28                                      | 11034015 | 2 | 38 | G:0.157895      | A:0.842105    |
| chr28                                      | 11034065 | 2 | 38 | C:1 T:0         |               |
| chr28                                      | 11034156 | 2 | 38 | C:0.815789      | T:0.184211    |
| chr28                                      | 11034325 | 2 | 38 | G:0.447368      | A:0.552632    |
| chr28                                      | 11034469 | 2 | 30 | C:0.8 CTTT:0.2  |               |
| chr28                                      | 11034523 | 2 | 36 | CTT:0.416667    | C:0.583333    |
| chr28                                      | 11034636 | 2 | 36 | C:0.416667      | T:0.583333    |
| chr28                                      | 11034645 | 2 | 40 | G:0.95 GT:0.05  |               |
| chr28                                      | 11034647 | 2 | 40 | GCCCAACC:0.95   | G:0.05        |
| chr28                                      | 11034970 | 2 | 40 | G:0.875 A:0.125 |               |
| chr28                                      | 11035099 | 2 | 40 | G:0.625 A:0.375 |               |
| chr28                                      | 11035355 | 2 | 38 | G:1 A:0         |               |
| chr28                                      | 11035439 | 2 | 40 | C:1 T:0         |               |

|                                            |          |   |    |               |                 |
|--------------------------------------------|----------|---|----|---------------|-----------------|
| chr28                                      | 11035764 | 2 | 36 | G:0.388889    | A:0.611111      |
| chr28                                      | 11035877 | 2 | 36 | C:0.527778    | T:0.472222      |
| chr28                                      | 11036037 | 2 | 34 | C:1           | T:0             |
| chr28                                      | 11036374 | 2 | 38 | C:0.421053    | T:0.578947      |
| chr28                                      | 11036470 | 2 | 38 | G:0.894737    | A:0.105263      |
| chr28                                      | 11036491 | 2 | 40 | C:0.725       | T:0.275         |
| chr28                                      | 11036637 | 2 | 40 | C:0.425       | A:0.575         |
| chr28                                      | 11036639 | 2 | 40 | T:0.85        | G:0.15          |
| chr28                                      | 11036705 | 2 | 40 | G:0.775       | A:0.225         |
| chr28                                      | 11036874 | 2 | 38 | C:0.157895    | G:0.842105      |
| chr28                                      | 11037064 | 2 | 40 | G:0.7         | A:0.3           |
| chr28                                      | 11037211 | 2 | 40 | T:0.875       | C:0.125         |
| chr28                                      | 11037431 | 2 | 40 | G:0.75        | A:0.25          |
| chr28                                      | 11037491 | 2 | 40 | CTTTTCT:0.675 | C:0.325         |
| chr28                                      | 11037506 | 2 | 40 | T:0.875       | C:0.125         |
| chr28                                      | 11037508 | 2 | 40 | C:0.875       | T:0.125         |
| chr28                                      | 11037518 | 2 | 40 | C:0.875       | T:0.125         |
| chr28                                      | 11037522 | 4 | 40 | C:0.65        | T:0.125         |
| CTTCTTTCTTTCTTTCTTTTTCTTTCTTTCT:0.225      |          |   |    |               |                 |
| CTTCTTTCTTTCTTTCTTTCTTTCTTTTTCTTTCTTTCTT:0 |          |   |    |               |                 |
| chr28                                      | 11037524 | 2 | 40 | T:0.875       | C:0.125         |
| chr28                                      | 11037538 | 2 | 40 | A:0.775       | T:0.225         |
| chr28                                      | 11037815 | 2 | 38 | G:0.421053    | C:0.578947      |
| chr28                                      | 11037838 | 2 | 40 | C:0.875       | T:0.125         |
| chr28                                      | 11037916 | 2 | 38 | A:0.736842    | T:0.263158      |
| chr28                                      | 11037997 | 2 | 34 | G:0.911765    | A:0.0882353     |
| chr28                                      | 11038002 | 2 | 34 | T:0.441176    | A:0.558824      |
| chr28                                      | 11038011 | 2 | 34 | T:0           | C:1             |
| chr28                                      | 11038194 | 2 | 16 | G:1           | A:0             |
| chr28                                      | 11038344 | 2 | 40 | ATTCT:0.9     | A:0.1           |
| chr28                                      | 11038412 | 2 | 40 | C:1           | T:0             |
| chr28                                      | 11038442 | 2 | 40 | G:1           | A:0             |
| chr28                                      | 11038526 | 2 | 34 | A:0.911765    | G:0.0882353     |
| chr28                                      | 11038578 | 2 | 38 | G:0.842105    | A:0.157895      |
| chr28                                      | 11038649 | 2 | 36 | A:0.805556    | G:0.194444      |
| chr28                                      | 11038656 | 2 | 36 | A:0.805556    | C:0.194444      |
| chr28                                      | 11038726 | 2 | 40 | G:0.8         | A:0.2           |
| chr28                                      | 11038746 | 2 | 40 | CT:0.8        | C:0.2           |
| chr28                                      | 11038767 | 2 | 40 | T:0.4         | C:0.6           |
| chr28                                      | 11038955 | 2 | 36 | C:0.805556    | T:0.194444      |
| chr28                                      | 11039000 | 2 | 36 | A:0.777778    | T:0.222222      |
| chr28                                      | 11039001 | 2 | 36 | G:0.833333    | C:0.166667      |
| chr28                                      | 11039040 | 2 | 38 | A:0.815789    | G:0.184211      |
| chr28                                      | 11039042 | 2 | 38 | A:0.815789    | G:0.184211      |
| chr28                                      | 11039119 | 2 | 36 | T:0.861111    | G:0.138889      |
| chr28                                      | 11039147 | 2 | 34 | G:0.941176    | A:0.0588235     |
| chr28                                      | 11039175 | 2 | 38 | G:0.842105    | A:0.157895      |
| chr28                                      | 11039213 | 2 | 38 | G:0.815789    | A:0.184211      |
| chr28                                      | 11039336 | 2 | 38 | C:0.842105    | T:0.157895      |
| chr28                                      | 11039421 | 2 | 38 | G:0.842105    | A:0.157895      |
| chr28                                      | 11039444 | 2 | 38 | A:0.842105    | G:0.157895      |
| chr28                                      | 11039502 | 2 | 40 | G:0.85        | GAAGTCCCCT:0.15 |
| chr28                                      | 11039705 | 2 | 40 | C:0.75        | T:0.25          |
| chr28                                      | 11039750 | 2 | 40 | G:0.7         | T:0.3           |

|       |          |   |    |            |             |
|-------|----------|---|----|------------|-------------|
| chr28 | 11039822 | 2 | 38 | G:0.868421 | A:0.131579  |
| chr28 | 11039827 | 2 | 38 | G:0.263158 | C:0.736842  |
| chr28 | 11039882 | 2 | 38 | C:1        | T:0         |
| chr28 | 11039902 | 2 | 38 | G:0.789474 | A:0.210526  |
| chr28 | 11039922 | 2 | 38 | G:0.684211 | A:0.315789  |
| chr28 | 11039935 | 2 | 38 | G:1        | A:0         |
| chr28 | 11039942 | 2 | 38 | G:0.789474 | A:0.210526  |
| chr28 | 11040024 | 2 | 36 | G:0.694444 | A:0.305556  |
| chr28 | 11040055 | 2 | 36 | A:0.138889 | C:0.861111  |
| chr28 | 11040084 | 2 | 36 | C:0.75     | A:0.25      |
| chr28 | 11040134 | 2 | 34 | T:0.117647 | C:0.882353  |
| chr28 | 11040220 | 2 | 40 | A:0.9      | G:0.1       |
| chr28 | 11040227 | 2 | 40 | G:0.9      | A:0.1       |
| chr28 | 11040244 | 2 | 40 | A:0.875    | T:0.125     |
| chr28 | 11040316 | 2 | 36 | A:0.722222 | G:0.277778  |
| chr28 | 11040349 | 2 | 36 | C:0.833333 | T:0.166667  |
| chr28 | 11040436 | 2 | 38 | T:0.394737 | C:0.605263  |
| chr28 | 11040688 | 2 | 38 | G:0.736842 | C:0.263158  |
| chr28 | 11040769 | 2 | 24 | T:0.75     | C:0.25      |
| chr28 | 11040994 | 2 | 36 | T:0.416667 | C:0.583333  |
| chr28 | 11041095 | 2 | 40 | A:1        | C:0         |
| chr28 | 11041311 | 2 | 38 | G:0.684211 | A:0.315789  |
| chr28 | 11041433 | 2 | 36 | C:0.111111 | T:0.888889  |
| chr28 | 11041590 | 2 | 36 | G:1        | A:0         |
| chr28 | 11041594 | 2 | 38 | C:0.947368 | T:0.0526316 |
| chr28 | 11041634 | 2 | 40 | A:0.75     | G:0.25      |
| chr28 | 11041754 | 2 | 38 | C:1        | T:0         |
| chr28 | 11041778 | 2 | 38 | T:0.552632 | C:0.447368  |
| chr28 | 11041959 | 2 | 34 | T:0.382353 | C:0.617647  |
| chr28 | 11042130 | 2 | 36 | C:0.472222 | A:0.527778  |
| chr28 | 11042173 | 2 | 38 | G:0.684211 | A:0.315789  |
| chr28 | 11042503 | 2 | 36 | C:0.75     | T:0.25      |
| chr28 | 11042585 | 2 | 40 | T:0.75     | A:0.25      |
| chr28 | 11042646 | 2 | 38 | T:0.552632 | A:0.447368  |
| chr28 | 11042665 | 2 | 36 | A:0.694444 | G:0.305556  |
| chr28 | 11042676 | 2 | 36 | A:0.527778 | G:0.472222  |
| chr28 | 11042708 | 2 | 32 | T:0.0625   | C:0.9375    |
| chr28 | 11042715 | 2 | 34 | T:0.676471 | C:0.323529  |
| chr28 | 11042733 | 2 | 36 | C:0.694444 | T:0.305556  |
| chr28 | 11042792 | 2 | 38 | A:0.710526 | G:0.289474  |
| chr28 | 11042800 | 2 | 38 | C:0.105263 | CA:0.894737 |
| chr28 | 11042878 | 2 | 40 | C:0.65     | T:0.35      |
| chr28 | 11042885 | 2 | 40 | A:0.65     | G:0.35      |
| chr28 | 11042902 | 2 | 40 | A:0.65     | T:0.35      |
| chr28 | 11042903 | 2 | 40 | T:0.65     | C:0.35      |
| chr28 | 11042925 | 2 | 38 | G:0.736842 | GT:0.263158 |
| chr28 | 11043013 | 2 | 40 | C:0.775    | T:0.225     |
| chr28 | 11043039 | 2 | 40 | G:0.725    | C:0.275     |
| chr28 | 11043040 | 2 | 40 | G:0.725    | T:0.275     |
| chr28 | 11043061 | 2 | 40 | A:0.7      | G:0.3       |
| chr28 | 11043217 | 2 | 40 | C:0.725    | T:0.275     |
| chr28 | 11043288 | 2 | 38 | T:0.368421 | G:0.631579  |
| chr28 | 11043364 | 2 | 40 | C:0.525    | T:0.475     |
| chr28 | 11043430 | 2 | 40 | A:0.775    | G:0.225     |

|                                         |          |   |    |              |                     |              |
|-----------------------------------------|----------|---|----|--------------|---------------------|--------------|
| chr28                                   | 11043466 | 2 | 40 | C:0.5        | T:0.5               |              |
| chr28                                   | 11043573 | 2 | 40 | G:0.575      | A:0.425             |              |
| chr28                                   | 11043743 | 2 | 40 | T:0.5        | C:0.5               |              |
| chr28                                   | 11043747 | 2 | 40 | G:0.5        | A:0.5               |              |
| chr28                                   | 11043767 | 2 | 40 | C:1          | A:0                 |              |
| chr28                                   | 11043779 | 2 | 34 | A:0.5        | G:0.5               |              |
| chr28                                   | 11043785 | 2 | 34 | G:0.852941   |                     | A:0.147059   |
| chr28                                   | 11043879 | 2 | 40 | C:0.6        | A:0.4               |              |
| chr28                                   | 11043889 | 2 | 40 | C:0.6        | G:0.4               |              |
| chr28                                   | 11043968 | 2 | 38 | C:0.789474   |                     | A:0.210526   |
| chr28                                   | 11044034 | 2 | 38 | C:0.473684   |                     | T:0.526316   |
| chr28                                   | 11044071 | 2 | 38 | A:0.710526   |                     | G:0.289474   |
| chr28                                   | 11044072 | 2 | 38 | T:0.710526   |                     | C:0.289474   |
| chr28                                   | 11044133 | 2 | 40 | A:0.425      | ACCCAGGGGTAAG:0.575 |              |
| chr28                                   | 11044260 | 2 | 38 | G:0.342105   |                     | C:0.657895   |
| chr28                                   | 11044291 | 2 | 38 | G:1          | A:0                 |              |
| chr28                                   | 11044351 | 2 | 36 | A:0.388889   |                     | T:0.611111   |
| chr28                                   | 11044353 | 2 | 36 | C:1          | T:0                 |              |
| chr28                                   | 11044494 | 2 | 40 | G:0.525      | A:0.475             |              |
| chr28                                   | 11044534 | 2 | 38 | A:0.789474   |                     | G:0.210526   |
| chr28                                   | 11044630 | 2 | 34 | G:0.911765   |                     | C:0.0882353  |
| chr28                                   | 11044814 | 2 | 38 | CCT:0.815789 |                     | C:0.184211   |
| chr28                                   | 11044910 | 2 | 40 | G:1          | A:0                 |              |
| chr28                                   | 11044915 | 2 | 38 | G:0.763158   |                     | T:0.236842   |
| chr28                                   | 11044953 | 2 | 40 | T:0.875      |                     |              |
| TGAGACTGAATTTTTTTTTTTTTTTTTTTGGAA:0.125 |          |   |    |              |                     |              |
| chr28                                   | 11044981 | 3 | 38 | G:0.763158   |                     | GGT:0.184211 |
| GGTGT:0.0526316                         |          |   |    |              |                     |              |
| chr28                                   | 11044996 | 2 | 36 | GTA:0.944444 |                     | G:0.0555556  |
| chr28                                   | 11044998 | 2 | 36 | A:0.666667   |                     | G:0.333333   |
| chr28                                   | 11045201 | 2 | 38 | C:1          | T:0                 |              |
| chr28                                   | 11045229 | 2 | 36 | G:0.861111   |                     | T:0.138889   |
| chr28                                   | 11045441 | 2 | 38 | G:0.868421   |                     | C:0.131579   |
| chr28                                   | 11045483 | 2 | 40 | G:1          | A:0                 |              |
| chr28                                   | 11045564 | 2 | 40 | T:0.575      | C:0.425             |              |
| chr28                                   | 11045598 | 2 | 40 | G:0.825      | A:0.175             |              |
| chr28                                   | 11045608 | 2 | 40 | A:0.375      | T:0.625             |              |
| chr28                                   | 11045649 | 2 | 40 | A:0.125      | C:0.875             |              |
| chr28                                   | 11045652 | 2 | 40 | C:0.525      | T:0.475             |              |
| chr28                                   | 11045820 | 2 | 38 | C:0.684211   |                     | T:0.315789   |
| chr28                                   | 11045837 | 2 | 38 | G:0.763158   |                     | A:0.236842   |
| chr28                                   | 11045846 | 2 | 38 | C:0.578947   |                     | T:0.421053   |
| chr28                                   | 11045875 | 2 | 36 | T:0.472222   |                     | C:0.527778   |
| chr28                                   | 11045956 | 2 | 38 | G:1          | A:0                 |              |
| chr28                                   | 11046093 | 2 | 40 | A:0.6        | T:0.4               |              |
| chr28                                   | 11046283 | 2 | 40 | C:0.8        | G:0.2               |              |
| chr28                                   | 11046314 | 3 | 40 | TTTTA:0.75   |                     | T:0.15       |
| TTTTATTTA:0.1                           |          |   |    |              |                     |              |
| chr28                                   | 11046366 | 2 | 38 | T:0.526316   |                     |              |
| TTTTATTTATTTATTTATTTATTTA:0.473684      |          |   |    |              |                     |              |
| chr28                                   | 11046734 | 2 | 40 | C:0.525      | T:0.475             |              |
| chr28                                   | 11046745 | 2 | 40 | C:0.525      | T:0.475             |              |
| chr28                                   | 11046806 | 2 | 36 | A:1          | G:0                 |              |
| chr28                                   | 11046821 | 2 | 34 | G:0.911765   |                     | A:0.0882353  |

|       |                  |    |                         |              |
|-------|------------------|----|-------------------------|--------------|
| chr28 | 11047302 2       | 38 | C:0.526316              | T:0.473684   |
| chr28 | 11047309 2       | 38 | C:1 T:0                 |              |
| chr28 | 11047492 2       | 40 | G:0.55 A:0.45           |              |
| chr28 | 11047710 2       | 38 | C:0.947368              | T:0.0526316  |
| chr28 | 11047757 2       | 40 | A:0.125 G:0.875         |              |
| chr28 | 11047883 2       | 36 | G:0.111111              | T:0.888889   |
| chr28 | 11047960 2       | 38 | A:1 T:0                 |              |
| chr28 | 11047997 2       | 38 | T:0.526316              | G:0.473684   |
| chr28 | 11048566 2       | 38 | A:0.947368              | C:0.0526316  |
| chr28 | 11048570 2       | 40 | A:0.425 G:0.575         |              |
| chr28 | 11048798 2       | 40 | A:0.1 G:0.9             |              |
| chr28 | 11048852 2       | 40 | C:1 T:0                 |              |
| chr28 | 11048868 2       | 38 | C:0.105263              | A:0.894737   |
| chr28 | 11048974 2       | 40 | C:0.625 A:0.375         |              |
| chr28 | 11049105 2       | 38 | C:1 T:0                 |              |
| chr28 | 11049165 2       | 34 | GA:0.147059             | G:0.852941   |
| chr28 | 11049177 2       | 34 | A:0.147059              | G:0.852941   |
| chr28 | 11049178 2       | 34 | A:0.147059              | T:0.852941   |
| chr28 | 11049225 2       | 38 | C:1 T:0                 |              |
| chr28 | 11049282 2       | 36 | A:0.944444              | AG:0.0555556 |
| chr28 | 11049309 3       | 38 | TAAAAACAAAAAC:0.605263  | T:0          |
|       | TAAAAAC:0.394737 |    |                         |              |
| chr28 | 11049314 2       | 38 | A:0.526316              | G:0.473684   |
| chr28 | 11049392 2       | 36 | C:0.5 CCTT:0.5          |              |
| chr28 | 11049477 2       | 38 | C:0.526316              | G:0.473684   |
| chr28 | 11049681 2       | 34 | T:0.970588              | C:0.0294118  |
| chr28 | 11049791 2       | 34 | T:1 C:0                 |              |
| chr28 | 11049831 2       | 40 | T:0.6 C:0.4             |              |
| chr28 | 11049855 2       | 40 | T:0.6 C:0.4             |              |
| chr28 | 11050086 2       | 40 | A:0.625 C:0.375         |              |
| chr28 | 11050104 2       | 40 | C:0.625 T:0.375         |              |
| chr28 | 11050151 2       | 40 | T:0.525 C:0.475         |              |
| chr28 | 11050468 2       | 36 | A:1 G:0                 |              |
| chr28 | 11050712 2       | 40 | G:0.95 A:0.05           |              |
| chr28 | 11050994 2       | 40 | T:0.175 A:0.825         |              |
| chr28 | 11051063 2       | 38 | C:0.763158              | T:0.236842   |
| chr28 | 11051264 2       | 38 | C:0.5 T:0.5             |              |
| chr28 | 11051347 2       | 30 | AT:1 A:0                |              |
| chr28 | 11051551 2       | 36 | AC:1 A:0                |              |
| chr28 | 11051910 2       | 24 | C:0.625 CT:0.375        |              |
| chr28 | 11051955 2       | 34 | C:1 T:0                 |              |
| chr28 | 11052728 2       | 38 | C:1 T:0                 |              |
| chr28 | 11052738 2       | 38 | C:1 T:0                 |              |
| chr28 | 11052817 2       | 38 | T:1 C:0                 |              |
| chr28 | 11052838 2       | 38 | TTTTCTTC:0.947368       | T:           |
|       | 0.0526316        |    |                         |              |
| chr28 | 11052898 2       | 38 | CTTTCTTTCTTTCT:0.973684 | C:           |
|       | 0.0263158        |    |                         |              |
| chr28 | 11052902 2       | 38 | CTTTCTTTCT:0.921053     | C:           |
|       | 0.0789474        |    |                         |              |
| chr28 | 11052911 2       | 40 | T:0.95 TTTC:0.05        |              |
| chr28 | 11053169 2       | 36 | C:1 T:0                 |              |
| chr28 | 11053300 2       | 38 | G:1 A:0                 |              |
| chr28 | 11054904 2       | 38 | T:0.815789              | C:0.184211   |

|       |               |    |                 |                |
|-------|---------------|----|-----------------|----------------|
| chr28 | 11055340 3    | 38 | CT:0.368421     | C:0.394737     |
|       | CTT:0.236842  |    |                 |                |
| chr28 | 11057389 2    | 38 | A:0.842105      | G:0.157895     |
| chr28 | 11057902 2    | 40 | T:1 C:0         |                |
| chr28 | 11058160 2    | 38 | C:1 T:0         |                |
| chr28 | 11058630 4    | 36 | ATTT:0.111111   | A:0.416667     |
|       | AT:0.444444   |    |                 |                |
|       | ATT:0.0277778 |    |                 |                |
| chr28 | 11058660 2    | 34 | T:1 C:0         |                |
| chr28 | 11059767 2    | 36 | T:0.5 TG:0.5    |                |
| chr28 | 11060285 2    | 38 | C:0.973684      | T:0.0263158    |
| chr28 | 11060514 2    | 38 | C:0.105263      | T:0.894737     |
| chr28 | 11060525 2    | 36 | C:0.972222      | CA:0.0277778   |
| chr28 | 11061225 2    | 38 | G:0.947368      | A:0.0526316    |
| chr28 | 11062055 2    | 40 | T:0.6 A:0.4     |                |
| chr28 | 11062158 2    | 34 | G:0.852941      | A:0.147059     |
| chr28 | 11062245 2    | 36 | T:0.611111      | C:0.388889     |
| chr28 | 11062255 2    | 36 | A:0.111111      | C:0.888889     |
| chr28 | 11062310 2    | 40 | G:0.8 A:0.2     |                |
| chr28 | 11062417 2    | 38 | T:0.789474      | TA:0.210526    |
| chr28 | 11062567 2    | 40 | T:0.775 C:0.225 |                |
| chr28 | 11062762 2    | 40 | C:0.775 T:0.225 |                |
| chr28 | 11062783 2    | 40 | C:0.775 G:0.225 |                |
| chr28 | 11062834 2    | 40 | A:0.225 T:0.775 |                |
| chr28 | 11062874 2    | 38 | G:0.973684      | C:0.0263158    |
| chr28 | 11063078 2    | 40 | A:0.05 T:0.95   |                |
| chr28 | 11063083 2    | 40 | T:0.825 G:0.175 |                |
| chr28 | 11063122 2    | 40 | T:0.775 C:0.225 |                |
| chr28 | 11063134 2    | 40 | T:0.775 C:0.225 |                |
| chr28 | 11063207 2    | 34 | C:0.852941      | T:0.147059     |
| chr28 | 11063288 2    | 40 | T:0.8 A:0.2     |                |
| chr28 | 11063324 2    | 40 | G:0.825 A:0.175 |                |
| chr28 | 11063335 2    | 40 | C:0.85 T:0.15   |                |
| chr28 | 11063349 2    | 40 | A:0.825 G:0.175 |                |
| chr28 | 11063403 2    | 40 | A:0.825 G:0.175 |                |
| chr28 | 11063568 2    | 38 | G:1 A:0         |                |
| chr28 | 11063647 2    | 40 | A:0.2 G:0.8     |                |
| chr28 | 11063753 2    | 38 | C:0.131579      | A:0.868421     |
| chr28 | 11063772 2    | 38 | TGTTA:0.131579  | T:0.868421     |
| chr28 | 11063953 2    | 38 | G:0.210526      | GTGTC:0.789474 |
| chr28 | 11064493 2    | 36 | T:0.166667      | C:0.833333     |
| chr28 | 11064863 3    | 38 | TAA:0.157895    | T:0.5 TA:      |
|       | 0.342105      |    |                 |                |
| chr28 | 11064942 2    | 36 | T:0.972222      | A:0.0277778    |
| chr28 | 11065209 2    | 30 | A:0.533333      | G:0.466667     |
| chr28 | 11066114 2    | 34 | CT:0.0882353    | C:0.911765     |
| chr28 | 11066583 2    | 36 | A:0.861111      | G:0.138889     |
| chr28 | 11066856 2    | 36 | A:0 T:1         |                |
| chr28 | 11066857 2    | 36 | A:0 G:1         |                |
| chr28 | 11066898 2    | 34 | A:0 G:1         |                |
| chr28 | 11066926 2    | 40 | A:0.6 AC:0.4    |                |
| chr28 | 11067087 2    | 36 | A:1 G:0         |                |
| chr28 | 11067397 2    | 38 | C:0.921053      | T:0.0789474    |
| chr28 | 11067465 2    | 40 | T:0.05 C:0.95   |                |
| chr28 | 11067559 2    | 38 | G:0.868421      | T:0.131579     |



|                        |          |   |    |                           |          |              |
|------------------------|----------|---|----|---------------------------|----------|--------------|
| chr28                  | 11067786 | 2 | 40 | T:0.675                   | C:0.325  |              |
| chr28                  | 11068293 | 2 | 36 | A:0.805556                |          | G:0.194444   |
| chr28                  | 11068294 | 2 | 36 | G:0.0833333               |          | GGA:0.916667 |
| chr28                  | 11068433 | 2 | 34 | T:0                       | G:1      |              |
| chr28                  | 11068476 | 2 | 38 | CTG:0.894737              |          | C:0.105263   |
| chr28                  | 11068486 | 2 | 38 | T:0                       | C:1      |              |
| chr28                  | 11068487 | 2 | 38 | T:0                       | C:1      |              |
| chr28                  | 11068648 | 2 | 34 | AT:0.823529               |          | A:0.176471   |
| chr28                  | 11068658 | 2 | 34 | T:1                       | A:0      |              |
| chr28                  | 11069264 | 2 | 40 | G:0.975                   | C:0.025  |              |
| chr28                  | 11069542 | 2 | 40 | G:1                       | C:0      |              |
| chr28                  | 11069630 | 2 | 40 | GCTGGCAAGTGCCTGGGGC:0.875 | G:0.125  |              |
| chr28                  | 11069722 | 2 | 40 | G:0.95                    | A:0.05   |              |
| chr28                  | 11070083 | 2 | 40 | AT:0.975                  | A:0.025  |              |
| chr28                  | 11070732 | 2 | 34 | C:1                       | T:0      |              |
| chr28                  | 11070951 | 2 | 40 | GT:0.55                   | G:0.45   |              |
| chr28                  | 11071678 | 2 | 38 | T:0.105263                |          | C:0.894737   |
| chr28                  | 11071878 | 2 | 38 | C:0.947368                |          | T:0.0526316  |
| chr28                  | 11071976 | 2 | 36 | C:0.888889                |          | T:0.111111   |
| chr28                  | 11072114 | 2 | 36 | A:0.638889                |          | T:0.361111   |
| chr28                  | 11072137 | 2 | 36 | A:0.583333                |          | G:0.416667   |
| chr28                  | 11072430 | 2 | 36 | T:0.527778                |          | C:0.472222   |
| chr28                  | 11072492 | 3 | 30 | CTT:0.433333              |          | C:0.266667   |
| CT:0.3                 |          |   |    |                           |          |              |
| chr28                  | 11072543 | 2 | 38 | GAC:0.842105              |          | G:0.157895   |
| chr28                  | 11072547 | 3 | 38 | CACAG:0.657895            |          | C:0.105263   |
| CAGAGAGAGACAG:0.236842 |          |   |    |                           |          |              |
| chr28                  | 11072549 | 3 | 38 | CAGAGAG:0.552632          |          | C:0.0526316  |
| GAGAGAG:0.394737       |          |   |    |                           |          |              |
| chr28                  | 11072840 | 2 | 34 | G:0.117647                |          | T:0.882353   |
| chr28                  | 11073413 | 2 | 36 | T:0.527778                |          | A:0.472222   |
| chr28                  | 11073415 | 2 | 36 | G:0.527778                |          | A:0.472222   |
| chr28                  | 11073659 | 2 | 38 | C:1                       | T:0      |              |
| chr28                  | 11073995 | 2 | 32 | GCTT:0.4375               |          | G:0.5625     |
| chr28                  | 11073998 | 2 | 34 | T:0.941176                |          | G:0.0588235  |
| chr28                  | 11073999 | 2 | 34 | CTT:0.941176              |          | C:0.0588235  |
| chr28                  | 11074002 | 2 | 38 | T:0.921053                |          | C:0.0789474  |
| chr28                  | 11074091 | 2 | 36 | A:0.944444                |          | G:0.0555556  |
| chr28                  | 11074125 | 2 | 38 | A:0.842105                |          | G:0.157895   |
| chr28                  | 11074183 | 2 | 36 | C:0.972222                |          | T:0.0277778  |
| chr28                  | 11074258 | 2 | 38 | C:1                       | T:0      |              |
| chr28                  | 11074371 | 2 | 38 | C:0.947368                |          | CG:0.0526316 |
| chr28                  | 11074479 | 2 | 38 | A:1                       | G:0      |              |
| chr28                  | 11074654 | 2 | 40 | G:0.925                   | A:0.075  |              |
| chr28                  | 11074671 | 2 | 40 | GGC:0.575                 |          | G:0.425      |
| chr28                  | 11074800 | 2 | 38 | G:0.921053                |          | A:0.0789474  |
| chr28                  | 11074844 | 2 | 38 | GGT:0.815789              |          | G:0.184211   |
| chr28                  | 11074860 | 2 | 38 | G:0.815789                |          | A:0.184211   |
| chr28                  | 11074980 | 2 | 38 | G:1                       | C:0      |              |
| chr28                  | 11075230 | 2 | 32 | A:0.9375                  | G:0.0625 |              |
| chr28                  | 11075318 | 2 | 36 | A:0.944444                |          | G:0.0555556  |
| chr28                  | 11075428 | 2 | 36 | C:0.916667                |          | T:0.0833333  |
| chr28                  | 11075439 | 2 | 36 | C:0.916667                |          | G:0.0833333  |
| chr28                  | 11075530 | 2 | 38 | C:0.973684                |          | T:0.0263158  |

|                                  |            |    |                                  |                 |
|----------------------------------|------------|----|----------------------------------|-----------------|
| chr28                            | 11075544 2 | 38 | ATAAGT:0.973684                  | A:0.0263158     |
| chr28                            | 11075654 2 | 36 | A:0.805556                       | AT:0.194444     |
| chr28                            | 11075655 2 | 36 | A:0.805556                       | T:0.194444      |
| chr28                            | 11075670 2 | 38 | C:0.131579                       | T:0.868421      |
| chr28                            | 11075741 3 | 38 | TTTATTTA:0.578947                | TTTTA:          |
| 0.289474                         | T:0.131579 |    |                                  |                 |
| chr28                            | 11075748 3 | 40 | ATTTTT:0.325                     | A:0.275 ATTTTT: |
| 0.4                              |            |    |                                  |                 |
| chr28                            | 11075791 2 | 36 | A:0.944444                       | C:0.0555556     |
| chr28                            | 11075888 2 | 34 | G:0.794118                       | C:0.205882      |
| chr28                            | 11075926 2 | 38 | A:0.131579                       | G:0.868421      |
| chr28                            | 11075938 2 | 38 | T:0.763158                       | G:0.236842      |
| chr28                            | 11075981 2 | 36 | T:1 TC:0                         |                 |
| chr28                            | 11076189 2 | 38 | AT:0.973684                      | A:0.0263158     |
| chr28                            | 11076227 2 | 40 | G:0.925 T:0.075                  |                 |
| chr28                            | 11076236 2 | 40 | T:0.925 TG:0.075                 |                 |
| chr28                            | 11076317 2 | 40 | G:0.925 C:0.075                  |                 |
| chr28                            | 11076385 2 | 40 | G:1 A:0                          |                 |
| chr28                            | 11076630 2 | 36 | T:0.916667                       | C:0.0833333     |
| chr28                            | 11076714 2 | 38 | G:0.947368                       | A:0.0526316     |
| chr28                            | 11076770 2 | 38 | G:0.921053                       | A:0.0789474     |
| chr28                            | 11076911 2 | 40 | G:0.95 A:0.05                    |                 |
| chr28                            | 11076921 2 | 40 | T:0.925 A:0.075                  |                 |
| chr28                            | 11076937 2 | 40 | C:0.95 T:0.05                    |                 |
| chr28                            | 11076994 2 | 40 | GCACTGC:0.975                    | G:0.025         |
| chr28                            | 11077054 2 | 38 | C:1 A:0                          |                 |
| chr28                            | 11077133 2 | 40 | C:0.65 T:0.35                    |                 |
| chr28                            | 11077297 2 | 38 | C:0.789474                       | T:0.210526      |
| chr28                            | 11077318 2 | 38 | A:0.131579                       | G:0.868421      |
| chr28                            | 11077319 2 | 38 | T:0.973684                       | C:0.0263158     |
| chr28                            | 11077447 2 | 40 | T:0.95 TCCAGGCACAGAGCTACCAA:0.05 |                 |
| chr28                            | 11077561 2 | 38 | C:0.973684                       | T:0.0263158     |
| chr28                            | 11077680 2 | 40 | CTT:0.95 C:0.05                  |                 |
| chr28                            | 11077780 2 | 40 | G:0.975 A:0.025                  |                 |
| chr28                            | 11077863 2 | 40 | C:0.6 A:0.4                      |                 |
| chr28                            | 11077910 2 | 40 | G:1 C:0                          |                 |
| chr28                            | 11078064 2 | 40 | GA:0.925 G:0.075                 |                 |
| chr28                            | 11078201 2 | 38 | T:0.578947                       | C:0.421053      |
| chr28                            | 11078236 2 | 40 | A:0.95 G:0.05                    |                 |
| chr28                            | 11078310 2 | 36 | A:0.583333                       | G:0.416667      |
| chr28                            | 11078317 2 | 36 | A:0.916667                       | C:0.0833333     |
| chr28                            | 11078404 2 | 36 | C:0.0555556                      | CG:0.944444     |
| chr28                            | 11078422 2 | 36 | C:0.833333                       | CGGCTGCTGTG:    |
| 0.166667                         |            |    |                                  |                 |
| chr28                            | 11078501 2 | 38 | A:0.894737                       | C:0.105263      |
| chr28                            | 11078804 2 | 40 | T:0.2 C:0.8                      |                 |
| chr28                            | 11078812 2 | 40 | CGGAGGGAGGGTACTGGCCCG:0.9        |                 |
| C:0.1                            |            |    |                                  |                 |
| chr28                            | 11078843 2 | 40 | A:0.025 G:0.975                  |                 |
| chr28                            | 11078939 2 | 40 | C:0.75 T:0.25                    |                 |
| chr28                            | 11078991 2 | 38 | A:0.763158                       | G:0.236842      |
| chr28                            | 11079200 2 | 40 | A:0.75 G:0.25                    |                 |
| chr28                            | 11079493 2 | 40 | A:0.625                          |                 |
| AATGAGTGC GTGCATT CAGTGTAT:0.375 |            |    |                                  |                 |

|       |            |    |                               |
|-------|------------|----|-------------------------------|
| chr28 | 11079599 2 | 40 | C:0.725 T:0.275               |
| chr28 | 11079620 2 | 40 | G:0.875 A:0.125               |
| chr28 | 11079735 2 | 38 | C:0.578947 T:0.421053         |
| chr28 | 11079947 2 | 40 | T:0.8 C:0.2                   |
| chr28 | 11080056 2 | 40 | G:0.95 C:0.05                 |
| chr28 | 11080401 2 | 36 | A:0.861111 G:0.138889         |
| chr28 | 11080539 2 | 34 | ACAG:0.970588 A:0.0294118     |
| chr28 | 11080543 2 | 34 | G:0.970588 GTGATGA:0.0294118  |
| chr28 | 11080749 2 | 40 | C:0.425 T:0.575               |
| chr28 | 11080756 2 | 40 | T:0.825 C:0.175               |
| chr28 | 11080853 2 | 36 | TG:0.972222 T:0.0277778       |
| chr28 | 11080976 2 | 40 | T:0.875 G:0.125               |
| chr28 | 11081239 2 | 40 | A:0.8 G:0.2                   |
| chr28 | 11081330 2 | 38 | CTG:1 C:0                     |
| chr28 | 11081483 2 | 38 | A:0.763158 AC:0.236842        |
| chr28 | 11081494 2 | 38 | T:0.605263 G:0.394737         |
| chr28 | 11081540 2 | 36 | C:0.75 T:0.25                 |
| chr28 | 11081649 2 | 34 | C:0.970588 T:0.0294118        |
| chr28 | 11081757 2 | 36 | C:0.222222 G:0.777778         |
| chr28 | 11081919 2 | 38 | C:0.736842 T:0.263158         |
| chr28 | 11081959 2 | 38 | T:0.131579 C:0.868421         |
| chr28 | 11082040 2 | 40 | T:0.75 C:0.25                 |
| chr28 | 11082136 2 | 40 | A:0.725 C:0.275               |
| chr28 | 11082244 2 | 40 | C:0.025 T:0.975               |
| chr28 | 11082388 2 | 40 | C:0.05 G:0.95                 |
| chr28 | 11082442 2 | 38 | C:0.0263158 T:0.973684        |
| chr28 | 11082920 2 | 40 | G:0.825 A:0.175               |
| chr28 | 11083144 2 | 36 | T:0.833333 C:0.166667         |
| chr28 | 11083204 3 | 40 | C:0.8 G:0 T:0.2               |
| chr28 | 11083338 2 | 40 | C:0.575 CTG:0.425             |
| chr28 | 11083603 2 | 38 | A:0.684211 T:0.315789         |
| chr28 | 11083870 2 | 40 | C:0.45 T:0.55                 |
| chr28 | 11083873 2 | 38 | C:1 T:0                       |
| chr28 | 11083874 2 | 38 | G:1 A:0                       |
| chr28 | 11083953 2 | 40 | C:0.925 T:0.075               |
| chr28 | 11084408 2 | 38 | C:0.894737 T:0.105263         |
| chr28 | 11084893 2 | 24 | T:0.833333 TA:0.166667        |
| chr28 | 11084944 2 | 40 | GAGAGAGAGAGACGCGCC:0.6 G:0.4  |
| chr28 | 11085077 2 | 36 | G:0.333333 A:0.666667         |
| chr28 | 11085221 2 | 36 | T:0.5 C:0.5                   |
| chr28 | 11085223 2 | 36 | C:0.972222 A:0.0277778        |
| chr28 | 11085484 2 | 40 | G:0.95 A:0.05                 |
| chr28 | 11085598 2 | 40 | GT:1 G:0                      |
| chr28 | 11085630 2 | 40 | A:1 G:0                       |
| chr28 | 11085654 2 | 40 | A:0.175 AGTGAAGTACTGTGG:0.825 |
| chr28 | 11085939 2 | 38 | T:0.947368 C:0.0526316        |
| chr28 | 11086111 2 | 38 | G:1 A:0                       |
| chr28 | 11086130 2 | 36 | C:0.666667 CG:0.333333        |
| chr28 | 11086334 2 | 38 | C:0.473684 A:0.526316         |
| chr28 | 11086385 2 | 40 | G:0.7 A:0.3                   |
| chr28 | 11086761 2 | 38 | C:0.5 T:0.5                   |
| chr28 | 11086773 2 | 36 | T:0.5 C:0.5                   |
| chr28 | 11086780 2 | 38 | C:0.973684 T:0.0263158        |
| chr28 | 11087050 2 | 38 | T:0.526316 C:0.473684         |

|       |                        |    |             |          |              |
|-------|------------------------|----|-------------|----------|--------------|
| chr28 | 11087121 2             | 40 | G:0.95      | A:0.05   |              |
| chr28 | 11087143 2             | 40 | T:0.975     | C:0.025  |              |
| chr28 | 11087191 2             | 38 | C:0.973684  |          | CT:0.0263158 |
| chr28 | 11087197 3             | 38 | A:0.0789474 |          | G:0.894737   |
|       | C:0.0263158            |    |             |          |              |
| chr28 | 11087228 2             | 40 | G:0.875     | T:0.125  |              |
| chr28 | 11087249 2             | 40 | T:0.125     | C:0.875  |              |
| chr28 | 11087269 3             | 40 | A:0.1       | G:0.875  | C:0.025      |
| chr28 | 11087277 2             | 40 | C:0.95      | T:0.05   |              |
| chr28 | 11087278 2             | 40 | G:0.925     | A:0.075  |              |
| chr28 | 11087407 2             | 38 | C:1         | T:0      |              |
| chr28 | 11087609 2             | 34 | C:0.911765  |          | T:0.0882353  |
| chr28 | 11087639 2             | 38 | C:0.763158  |          | T:0.236842   |
| chr28 | 11087712 2             | 40 | C:1         | A:0      |              |
| chr28 | 11088107 2             | 38 | T:0.921053  |          | A:0.0789474  |
| chr28 | 11088113 2             | 38 | A:0.684211  |          | G:0.315789   |
| chr28 | 11088146 2             | 38 | C:0.868421  |          | T:0.131579   |
| chr28 | 11088216 2             | 38 | T:0.552632  |          | A:0.447368   |
| chr28 | 11088303 2             | 38 | T:0.921053  |          | A:0.0789474  |
| chr28 | 11088311 2             | 38 | T:0.921053  |          | A:0.0789474  |
| chr28 | 11088406 2             | 38 | G:0.789474  |          | T:0.210526   |
| chr28 | 11088443 2             | 38 | C:0.947368  |          | T:0.0526316  |
| chr28 | 11088646 2             | 38 | G:0.973684  |          | C:0.0263158  |
| chr28 | 11088889 2             | 38 | C:0.184211  |          | G:0.815789   |
| chr28 | 11088961 2             | 38 | G:0.210526  |          | T:0.789474   |
| chr28 | 11089447 2             | 36 | T:0.805556  |          | TG:0.194444  |
| chr28 | 11089675 2             | 36 | T:0.972222  |          | C:0.0277778  |
| chr28 | 11089868 2             | 38 | ATGAT:1     | A:0      |              |
| chr28 | 11090312 2             | 40 | C:0.7       | T:0.3    |              |
| chr28 | 11090385 2             | 38 | C:0.394737  |          | T:0.605263   |
| chr28 | 11090391 2             | 38 | G:0.947368  |          | A:0.0526316  |
| chr28 | 11090401 2             | 38 | T:0.947368  |          | C:0.0526316  |
| chr28 | 11090601 2             | 40 | T:0.725     | C:0.275  |              |
| chr28 | 11090646 2             | 36 | G:0.75      | A:0.25   |              |
| chr28 | 11090851 2             | 36 | T:0.972222  |          | C:0.0277778  |
| chr28 | 11091691 2             | 38 | T:0.842105  |          | C:0.157895   |
| chr28 | 11091957 2             | 38 | A:0.342105  |          | T:0.657895   |
| chr28 | 11091964 2             | 38 | C:0.973684  |          | T:0.0263158  |
| chr28 | 11091986 2             | 40 | C:0.225     | T:0.775  |              |
| chr28 | 11092072 2             | 38 | G:0.763158  |          | A:0.236842   |
| chr28 | 11092484 2             | 34 | G:0.352941  |          | A:0.647059   |
| chr28 | 11092673 2             | 38 | C:0.973684  |          | G:0.0263158  |
| chr28 | 11092734 2             | 36 | G:0.333333  |          | A:0.666667   |
| chr28 | 11092759 2             | 36 | A:0.222222  |          | G:0.777778   |
| chr28 | 11092773 4             | 36 | CT:0.472222 |          | C:0 CTT:     |
|       | 0.361111 CTTT:0.166667 |    |             |          |              |
| chr28 | 11092798 2             | 32 | A:0.21875   |          | G:0.78125    |
| chr28 | 11093193 2             | 32 | T:0.9375    | C:0.0625 |              |
| chr28 | 11093450 2             | 38 | C:1         | T:0      |              |
| chr28 | 11093451 2             | 38 | G:1         | A:0      |              |
| chr28 | 11093600 2             | 38 | T:0.315789  |          | C:0.684211   |
| chr28 | 11093730 2             | 38 | C:0.973684  |          | T:0.0263158  |
| chr28 | 11093772 2             | 40 | A:0.15      | C:0.85   |              |
| chr28 | 11094006 2             | 34 | T:0.0882353 |          | C:0.911765   |

|       |          |   |    |                            |             |
|-------|----------|---|----|----------------------------|-------------|
| chr28 | 11094058 | 2 | 38 | C:0.184211                 | T:0.815789  |
| chr28 | 11094197 | 2 | 40 | A:0.2 C:0.8                |             |
| chr28 | 11094562 | 2 | 38 | T:0.184211                 | C:0.815789  |
| chr28 | 11094827 | 2 | 32 | T:0 C:1                    |             |
| chr28 | 11094880 | 2 | 30 | G:1 C:0                    |             |
| chr28 | 11095001 | 2 | 10 | CTA:0.2 C:0.8              |             |
| chr28 | 11095046 | 2 | 34 | GAGGT:0.117647             | G:0.882353  |
| chr28 | 11095051 | 2 | 34 | CATCACTGTTTCCTCGA:0.117647 |             |
|       |          |   |    | C:0.882353                 |             |
| chr28 | 11095265 | 2 | 30 | A:0.0333333                | G:0.966667  |
| chr28 | 11095422 | 2 | 30 | C:1 T:0                    |             |
| chr28 | 11095450 | 2 | 30 | T:0.1 C:0.9                |             |
| chr28 | 11095473 | 2 | 22 | G:0.363636                 | GC:0.636364 |
| chr28 | 11095587 | 2 | 32 | GC:0.59375                 | G:0.40625   |
| chr28 | 11095611 | 2 | 32 | T:0.96875                  | C:0.03125   |
| chr28 | 11095636 | 2 | 34 | T:0.0294118                | TC:0.970588 |
| chr28 | 11095641 | 2 | 34 | T:0.0294118                | C:0.970588  |
| chr28 | 11095713 | 2 | 34 | G:0.235294                 | A:0.764706  |
| chr28 | 11095747 | 2 | 32 | C:0.25 T:0.75              |             |
| chr28 | 11096086 | 2 | 40 | T:0.225 TC:0.775           |             |
| chr28 | 11096095 | 2 | 40 | T:0.225 C:0.775            |             |
| chr28 | 11096168 | 2 | 38 | T:0.105263                 | C:0.894737  |
| chr28 | 11096230 | 2 | 38 | C:0.947368                 | G:0.0526316 |
| chr28 | 11096387 | 2 | 38 | T:0.131579                 | C:0.868421  |
| chr28 | 11096613 | 2 | 40 | C:0.125 A:0.875            |             |
| chr28 | 11096615 | 2 | 40 | C:0.2 T:0.8                |             |
| chr28 | 11096744 | 2 | 34 | C:1 T:0                    |             |
| chr28 | 11096805 | 2 | 36 | G:0.972222                 | A:0.0277778 |
| chr28 | 11096887 | 2 | 40 | C:0.125 T:0.875            |             |
| chr28 | 11096899 | 2 | 40 | TTATAA:0.225               | T:0.775     |
| chr28 | 11097168 | 2 | 34 | C:0.941176                 | T:0.0588235 |
| chr28 | 11097174 | 2 | 32 | T:0.15625                  | C:0.84375   |
| chr28 | 11097222 | 2 | 36 | G:0.888889                 | T:0.111111  |
| chr28 | 11097772 | 2 | 38 | T:0.105263                 | C:0.894737  |
| chr28 | 11097881 | 2 | 38 | G:0.921053                 | T:0.0789474 |
| chr28 | 11098026 | 2 | 40 | A:0.825 C:0.175            |             |
| chr28 | 11098304 | 2 | 36 | G:0.916667                 | T:0.0833333 |
| chr28 | 11098527 | 2 | 36 | A:0.972222                 | G:0.0277778 |
| chr28 | 11098587 | 2 | 38 | A:0.0526316                | G:0.947368  |
| chr28 | 11098782 | 2 | 40 | C:1 CCTT:0                 |             |
| chr28 | 11099365 | 2 | 34 | G:0.823529                 | C:0.176471  |
| chr28 | 11099488 | 2 | 34 | GA:0.0882353               | G:0.911765  |
| chr28 | 11099513 | 2 | 36 | G:0.833333                 | A:0.166667  |
| chr28 | 11099641 | 2 | 34 | G:0.823529                 | A:0.176471  |
| chr28 | 11099763 | 2 | 36 | T:0.916667                 | C:0.0833333 |
| chr28 | 11099799 | 2 | 34 | A:0.352941                 | G:0.647059  |
| chr28 | 11100187 | 2 | 36 | T:0.972222                 | C:0.0277778 |
| chr28 | 11100307 | 2 | 40 | T:0.15 C:0.85              |             |
| chr28 | 11100470 | 2 | 40 | T:0.925 C:0.075            |             |
| chr28 | 11100601 | 2 | 38 | G:0.789474                 | A:0.210526  |
| chr28 | 11100610 | 2 | 38 | G:0.947368                 | C:0.0526316 |
| chr28 | 11100623 | 2 | 40 | G:0.925 A:0.075            |             |
| chr28 | 11100882 | 2 | 38 | C:0.236842                 | T:0.763158  |
| chr28 | 11101093 | 2 | 38 | T:0.236842                 | C:0.763158  |

|       |            |    |                         |              |
|-------|------------|----|-------------------------|--------------|
| chr28 | 11101147 2 | 38 | C:0.973684              | T:0.0263158  |
| chr28 | 11101263 2 | 40 | T:0.925 TA:0.075        |              |
| chr28 | 11101367 2 | 38 | G:0.131579              | C:0.868421   |
| chr28 | 11101835 2 | 34 | C:0.205882              | T:0.794118   |
| chr28 | 11101862 2 | 32 | T:0.03125               | TC:0.96875   |
| chr28 | 11101892 2 | 30 | A:0.933333              | AC:0.0666667 |
| chr28 | 11102125 2 | 36 | C:0.194444              | T:0.805556   |
| chr28 | 11102168 2 | 38 | C:1 T:0                 |              |
| chr28 | 11102205 2 | 36 | C:1 T:0                 |              |
| chr28 | 11102340 2 | 40 | G:0.25 A:0.75           |              |
| chr28 | 11102341 2 | 40 | C:0.9 T:0.1             |              |
| chr28 | 11102815 2 | 34 | C:1 T:0                 |              |
| chr28 | 11103125 2 | 40 | G:0.25 A:0.75           |              |
| chr28 | 11103373 2 | 40 | C:0.95 G:0.05           |              |
| chr28 | 11103479 2 | 40 | C:0.125 T:0.875         |              |
| chr28 | 11103607 2 | 38 | G:0.210526              | A:0.789474   |
| chr28 | 11103837 2 | 40 | A:0.55 AT:0.45          |              |
| chr28 | 11104180 2 | 38 | G:0.0526316             | A:0.947368   |
| chr28 | 11104411 2 | 38 | G:0.105263              | A:0.894737   |
| chr28 | 11104762 2 | 36 | A:0.944444              | G:0.0555556  |
| chr28 | 11104855 2 | 40 | TTGTC:0.85              | T:0.15       |
| chr28 | 11105005 2 | 38 | C:0.184211              | A:0.815789   |
| chr28 | 11105189 2 | 38 | T:0.0789474             | C:0.921053   |
| chr28 | 11105214 2 | 38 | G:0.789474              | A:0.210526   |
| chr28 | 11105290 2 | 40 | C:1 A:0                 |              |
| chr28 | 11105354 2 | 36 | T:0.138889              | G:0.861111   |
| chr28 | 11105413 2 | 38 | T:0.394737              | A:0.605263   |
| chr28 | 11105483 2 | 40 | C:0.9 T:0.1             |              |
| chr28 | 11105707 2 | 40 | C:0.85 T:0.15           |              |
| chr28 | 11105854 2 | 34 | A:0.323529              | AT:0.676471  |
| chr28 | 11105936 2 | 40 | A:0.075 C:0.925         |              |
| chr28 | 11106029 2 | 38 | C:0.131579              | T:0.868421   |
| chr28 | 11106299 2 | 36 | C:0.194444              | T:0.805556   |
| chr28 | 11106656 2 | 18 | G:0.111111              | C:0.888889   |
| chr28 | 11106834 2 | 32 | GA:0.96875              | G:0.03125    |
| chr28 | 11106854 2 | 32 | GGAA:0.84375            | G:0.15625    |
| chr28 | 11107247 2 | 38 | G:0.789474              | T:0.210526   |
| chr28 | 11107330 2 | 38 | C:0.289474              | G:0.710526   |
| chr28 | 11107343 2 | 38 | A:0.973684              | AG:0.0263158 |
| chr28 | 11107350 2 | 38 | A:0.289474              | C:0.710526   |
| chr28 | 11108437 2 | 40 | A:0.975 G:0.025         |              |
| chr28 | 11109076 2 | 40 | C:0.95 T:0.05           |              |
| chr28 | 11109354 2 | 40 | G:0.65 GCCCTCTGT:0.35   |              |
| chr28 | 11109367 2 | 40 | C:0.425 CTGTCCCTG:0.575 |              |
| chr28 | 11109508 2 | 40 | C:0.925 G:0.075         |              |
| chr28 | 11109652 2 | 36 | C:0.0277778             | T:0.972222   |
| chr28 | 11109667 2 | 38 | G:0.815789              | A:0.184211   |
| chr28 | 11109813 2 | 36 | G:0.75 T:0.25           |              |
| chr28 | 11110093 2 | 38 | C:0.315789              | A:0.684211   |
| chr28 | 11110396 2 | 40 | C:0.75 T:0.25           |              |
| chr28 | 11110523 2 | 40 | T:0.725 G:0.275         |              |
| chr28 | 11110596 2 | 40 | A:0.975 C:0.025         |              |
| chr28 | 11110844 2 | 40 | G:0.95 A:0.05           |              |
| chr28 | 11111059 2 | 38 | G:0.789474              | A:0.210526   |

|                                      |            |    |                   |                   |
|--------------------------------------|------------|----|-------------------|-------------------|
| chr28                                | 11111267 2 | 38 | T:0.973684        | C:0.0263158       |
| chr28                                | 11111378 2 | 40 | T:0.975           |                   |
| TGCCAGTGGTCCCTGGGCCCTCTTAGAGAA:0.025 |            |    |                   |                   |
| chr28                                | 11111411 2 | 40 | C:1               | T:0               |
| chr28                                | 11111442 2 | 40 | C:0.8             | T:0.2             |
| chr28                                | 11111522 2 | 36 | G:1               | C:0               |
| chr28                                | 11111683 2 | 40 | G:0.975           | A:0.025           |
| chr28                                | 11111688 2 | 40 | A:0.975           | ACT:0.025         |
| chr28                                | 11111767 2 | 40 | C:0.975           | CTGCCCATTT:0.025  |
| chr28                                | 11111835 2 | 34 | A:1               | G:0               |
| chr28                                | 11111999 2 | 40 | G:1               | A:0               |
| chr28                                | 11112156 2 | 38 | G:0.763158        | GGT:0.236842      |
| chr28                                | 11112381 2 | 38 | G:0.973684        | C:0.0263158       |
| chr28                                | 11112479 2 | 40 | T:0.975           | A:0.025           |
| chr28                                | 11112502 2 | 40 | T:0.95            | C:0.05            |
| chr28                                | 11112579 2 | 38 | A:0.947368        | G:0.0526316       |
| chr28                                | 11112915 2 | 38 | T:1               | C:0               |
| chr28                                | 11112950 2 | 34 | A:0.764706        | C:0.235294        |
| chr28                                | 11113095 2 | 36 | C:0.972222        | A:0.0277778       |
| chr28                                | 11113144 2 | 40 | C:0.975           | G:0.025           |
| chr28                                | 11113246 2 | 36 | A:0.111111        | G:0.888889        |
| chr28                                | 11113345 2 | 40 | CAGT:0.975        | C:0.025           |
| chr28                                | 11113470 2 | 40 | C:0.825           | T:0.175           |
| chr28                                | 11113826 2 | 38 | G:0.973684        | C:0.0263158       |
| chr28                                | 11113919 2 | 36 | G:0.722222        | T:0.277778        |
| chr28                                | 11113945 2 | 38 | G:0.710526        | A:0.289474        |
| chr28                                | 11114003 2 | 40 | C:1               | A:0               |
| chr28                                | 11114052 2 | 40 | CA:0.975          | C:0.025           |
| chr28                                | 11114214 2 | 40 | T:0.1             | TG:0.9            |
| chr28                                | 11114250 2 | 40 | G:0.675           | GGGCATCA:0.325    |
| chr28                                | 11114310 2 | 40 | C:0.95            | T:0.05            |
| chr28                                | 11114488 2 | 40 | G:0.075           | A:0.925           |
| chr28                                | 11114644 2 | 40 | G:0.975           | C:0.025           |
| chr28                                | 11114680 2 | 38 | C:0.894737        | A:0.105263        |
| chr28                                | 11114745 2 | 36 | C:0.944444        | G:0.0555556       |
| chr28                                | 11114952 2 | 34 | T:1               | G:0               |
| chr28                                | 11115466 2 | 38 | GGTCATCACTCTTTT:1 | G:0               |
| chr28                                | 11116483 2 | 32 | G:0.96875         | A:0.03125         |
| chr28                                | 11116748 2 | 34 | G:0.794118        | A:0.205882        |
| chr28                                | 11116868 2 | 34 | C:0.970588        | T:0.0294118       |
| chr28                                | 11117470 2 | 38 | C:1               | T:0               |
| chr28                                | 11117661 2 | 38 | C:0.973684        | T:0.0263158       |
| chr28                                | 11117865 2 | 38 | C:0.0263158       | G:0.973684        |
| chr28                                | 11117881 2 | 38 | T:0.947368        | C:0.0526316       |
| chr28                                | 11117882 2 | 38 | G:0.710526        | A:0.289474        |
| chr28                                | 11117970 2 | 40 | G:0.3             | A:0.7             |
| chr28                                | 11118123 2 | 40 | G:0.75            | T:0.25            |
| chr28                                | 11118577 2 | 36 | G:1               | A:0               |
| chr28                                | 11119076 3 | 40 | G:0.9             | GTGTATATATATA:0.1 |
| GTGTATATATATATATATATATATATATA:0      |            |    |                   |                   |
| chr28                                | 11119439 2 | 34 | TA:0.323529       | T:0.676471        |
| chr28                                | 11119460 2 | 36 | C:0.722222        | T:0.277778        |
| chr28                                | 11119719 2 | 40 | AGCCGC:0.275      | A:0.725           |
| chr28                                | 11119758 2 | 38 | C:1               | T:0               |

|       |            |    |                         |               |
|-------|------------|----|-------------------------|---------------|
| chr28 | 11119763 2 | 38 | G:0.210526              | A:0.789474    |
| chr28 | 11119851 2 | 38 | A:0.973684              | G:0.0263158   |
| chr28 | 11119940 2 | 38 | G:0.947368              | A:0.0526316   |
| chr28 | 11119970 2 | 40 | G:0.75 A:0.25           |               |
| chr28 | 11120461 2 | 38 | C:0.552632              | T:0.447368    |
| chr28 | 11120469 2 | 38 | T:0.0263158             | G:0.973684    |
| chr28 | 11120511 2 | 36 | C:0.75 T:0.25           |               |
| chr28 | 11120515 2 | 36 | A:0.0555556             | G:0.944444    |
| chr28 | 11120552 2 | 36 | A:0.0555556             | G:0.944444    |
| chr28 | 11120557 2 | 38 | G:0.736842              | A:0.263158    |
| chr28 | 11120715 2 | 38 | GCCTC:0.763158          | G:0.236842    |
| chr28 | 11120719 2 | 38 | C:0.315789              | G:0.684211    |
| chr28 | 11121395 2 | 34 | C:1 T:0                 |               |
| chr28 | 11122447 2 | 36 | G:0.972222              | A:0.0277778   |
| chr28 | 11122803 2 | 38 | G:0.921053              | A:0.0789474   |
| chr28 | 11122824 2 | 38 | C:0.657895              | T:0.342105    |
| chr28 | 11122877 2 | 38 | G:0.315789              | A:0.684211    |
| chr28 | 11122960 2 | 36 | A:0.888889              | C:0.111111    |
| chr28 | 11123223 2 | 32 | AGTGT:0.4375            | A:0.5625      |
| chr28 | 11123436 2 | 34 | C:0.352941              | T:0.647059    |
| chr28 | 11123464 3 | 20 | G:0.15 GC:0.3           | GCC:0.55      |
| chr28 | 11123682 2 | 36 | G:0.833333              | A:0.166667    |
| chr28 | 11123715 2 | 34 | T:0.941176              | TAG:0.0588235 |
| chr28 | 11123739 2 | 32 | A:0.71875               | G:0.28125     |
| chr28 | 11123933 2 | 40 | GTCAACCATCCAATGCA:0.775 | G:0.225       |
| chr28 | 11124034 2 | 36 | C:0.833333              | T:0.166667    |
| chr28 | 11124145 2 | 38 | T:0.736842              | C:0.263158    |
| chr28 | 11124619 2 | 38 | C:0.763158              | T:0.236842    |
| chr28 | 11124663 2 | 40 | AGGTGTCGCTATCTGCT:0.8   | A:0.2         |
| chr28 | 11124729 2 | 38 | T:0.736842              | C:0.263158    |
| chr28 | 11124852 2 | 38 | G:0.763158              | C:0.236842    |
| chr28 | 11124920 2 | 36 | G:0.916667              | A:0.0833333   |
| chr28 | 11125055 2 | 34 | G:0.970588              | A:0.0294118   |
| chr28 | 11125076 2 | 36 | T:0 C:1                 |               |
| chr28 | 11125082 2 | 38 | A:0.842105              | G:0.157895    |
| chr28 | 11125296 2 | 34 | G:1 C:0                 |               |
| chr28 | 11125301 2 | 36 | A:0.944444              | AG:0.0555556  |
| chr28 | 11126251 2 | 38 | G:0.0263158             | A:0.973684    |
| chr28 | 11126751 2 | 40 | A:0.725 T:0.275         |               |
| chr28 | 11127161 2 | 38 | T:0.315789              | TG:0.684211   |
| chr28 | 11127552 2 | 36 | A:0.694444              | G:0.305556    |
| chr28 | 11127885 2 | 36 | T:0.305556              | TG:0.694444   |
| chr28 | 11127933 2 | 38 | T:0.263158              | C:0.736842    |
| chr28 | 11128622 2 | 40 | G:0.225 A:0.775         |               |
| chr28 | 11128738 2 | 36 | C:1 T:0                 |               |
| chr28 | 11128850 2 | 36 | T:0.777778              | C:0.222222    |
| chr28 | 11128854 2 | 38 | C:0.973684              | T:0.0263158   |
| chr28 | 11128957 2 | 36 | C:0.944444              | T:0.0555556   |
| chr28 | 11129294 2 | 38 | C:0.973684              | G:0.0263158   |
| chr28 | 11129364 2 | 38 | G:0.263158              | A:0.736842    |
| chr28 | 11129661 2 | 38 | G:0.973684              | A:0.0263158   |
| chr28 | 11129712 2 | 40 | G:0.75 GAGA:0.25        |               |
| chr28 | 11129752 2 | 38 | A:0.657895              | G:0.342105    |
| chr28 | 11129795 2 | 36 | C:0.611111              | T:0.388889    |



|                       |          |   |    |                 |              |  |
|-----------------------|----------|---|----|-----------------|--------------|--|
| chr28                 | 11129822 | 2 | 34 | A:1             | C:0          |  |
| chr28                 | 11129834 | 2 | 36 | C:0.75          | G:0.25       |  |
| chr28                 | 11129868 | 2 | 38 | A:0.973684      | G:0.0263158  |  |
| chr28                 | 11130117 | 2 | 38 | C:0.657895      | T:0.342105   |  |
| chr28                 | 11130274 | 2 | 38 | A:0.710526      | T:0.289474   |  |
| chr28                 | 11130544 | 2 | 38 | G:1             | A:0          |  |
| chr28                 | 11130804 | 2 | 34 | C:0.794118      | T:0.205882   |  |
| chr28                 | 11130815 | 2 | 34 | C:0.794118      | T:0.205882   |  |
| chr28                 | 11130859 | 2 | 34 | G:0.794118      | A:0.205882   |  |
| chr28                 | 11131063 | 2 | 38 | T:0.763158      | C:0.236842   |  |
| chr28                 | 11131224 | 2 | 40 | A:0.775         | T:0.225      |  |
| chr28                 | 11131264 | 2 | 38 | T:0.0526316     | C:0.947368   |  |
| chr28                 | 11131378 | 2 | 38 | C:0.789474      | T:0.210526   |  |
| chr28                 | 11131401 | 2 | 38 | G:0.789474      | A:0.210526   |  |
| chr28                 | 11131888 | 2 | 32 | C:0.96875       | T:0.03125    |  |
| chr28                 | 11131963 | 2 | 36 | C:0.194444      | T:0.805556   |  |
| chr28                 | 11132199 | 2 | 40 | GAAGC:0.725     | G:0.275      |  |
| chr28                 | 11132234 | 2 | 36 | C:0.777778      | T:0.222222   |  |
| chr28                 | 11132682 | 2 | 38 | CTGGGA:0.684211 | C:0.315789   |  |
| chr28                 | 11132688 | 2 | 38 | T:0.605263      | C:0.394737   |  |
| chr28                 | 11132734 | 2 | 38 | G:0.973684      | T:0.0263158  |  |
| chr28                 | 11133031 | 2 | 38 | A:0.710526      | G:0.289474   |  |
| chr28                 | 11133123 | 2 | 40 | A:0.775         | C:0.225      |  |
| chr28                 | 11133233 | 2 | 36 | T:0.75          | C:0.25       |  |
| chr28                 | 11133371 | 2 | 36 | A:0.75          | G:0.25       |  |
| chr28                 | 11133787 | 2 | 38 | T:0.5           | G:0.5        |  |
| chr28                 | 11133958 | 2 | 40 | A:0.8           | T:0.2        |  |
| chr28                 | 11134127 | 2 | 40 | C:0.6           | T:0.4        |  |
| chr28                 | 11134128 | 2 | 40 | A:0.425         | G:0.575      |  |
| chr28                 | 11134207 | 2 | 40 | G:0.725         | GT:0.275     |  |
| chr28                 | 11134396 | 2 | 40 | C:0.775         | T:0.225      |  |
| chr28                 | 11134854 | 2 | 36 | C:0.777778      | G:0.222222   |  |
| chr28                 | 11135111 | 2 | 40 | A:0.725         | T:0.275      |  |
| chr28                 | 11135266 | 2 | 36 | T:0.722222      | C:0.277778   |  |
| chr28                 | 11135305 | 2 | 36 | A:0.694444      | G:0.305556   |  |
| chr28                 | 11135483 | 2 | 38 | G:0.763158      | T:0.236842   |  |
| chr28                 | 11136856 | 2 | 38 | T:0.368421      | G:0.631579   |  |
| chr28                 | 11137017 | 2 | 40 | G:0.975         | A:0.025      |  |
| chr28                 | 11137148 | 2 | 40 | G:1             | T:0          |  |
| chr28                 | 11137321 | 2 | 38 | T:0.421053      | C:0.578947   |  |
| chr28                 | 11137812 | 2 | 38 | C:0.973684      | T:0.0263158  |  |
| chr28                 | 11138410 | 2 | 38 | C:0.736842      | T:0.263158   |  |
| chr28                 | 11138674 | 2 | 36 | C:0.694444      | T:0.305556   |  |
| chr28                 | 11139107 | 2 | 38 | A:0.842105      | G:0.157895   |  |
| chr28                 | 11139630 | 2 | 38 | G:0.736842      | A:0.263158   |  |
| chr28                 | 11139927 | 2 | 38 | G:0.684211      | A:0.315789   |  |
| chr28                 | 11140069 | 2 | 38 | C:0.789474      | T:0.210526   |  |
| chr28                 | 11141630 | 2 | 36 | CT:0.694444     | C:0.305556   |  |
| chr28                 | 11141693 | 3 | 40 | C:0.525         | CAGAGAG:0.25 |  |
| CAGAGAGAGAG:0.225     |          |   |    |                 |              |  |
| chr28                 | 11141931 | 2 | 38 | A:0.473684      | T:0.526316   |  |
| chr28                 | 11141962 | 2 | 38 | C:0.421053      | T:0.578947   |  |
| chr28                 | 11142267 | 3 | 40 | T:0.45          | TAACAC:0.3   |  |
| TAACATAACATAACAC:0.25 |          |   |    |                 |              |  |

|                |          |   |    |                 |             |             |
|----------------|----------|---|----|-----------------|-------------|-------------|
| chr28          | 11142363 | 2 | 40 | G:0.475         | T:0.525     |             |
| chr28          | 11142488 | 2 | 40 | G:0.425         | A:0.575     |             |
| chr28          | 11142555 | 2 | 38 | CT:0.447368     |             | C:0.552632  |
| chr28          | 11142679 | 2 | 40 | A:0.725         | G:0.275     |             |
| chr28          | 11142692 | 2 | 40 | AC:0            | A:1         |             |
| chr28          | 11143194 | 2 | 38 | T:0             | C:1         |             |
| chr28          | 11143261 | 2 | 38 | T:0.447368      |             | C:0.552632  |
| chr28          | 11143450 | 2 | 40 | A:0.475         | G:0.525     |             |
| chr28          | 11144030 | 2 | 36 | C:0.472222      |             | G:0.527778  |
| chr28          | 11144307 | 2 | 34 | T:0.705882      |             | C:0.294118  |
| chr28          | 11144685 | 2 | 36 | A:0             | G:1         |             |
| chr28          | 11144887 | 2 | 38 | ACTCT:0.526316  |             | A:0.473684  |
| chr28          | 11145043 | 2 | 40 | T:0             | C:1         |             |
| chr28          | 11145093 | 2 | 40 | G:0.675         | T:0.325     |             |
| chr28          | 11145162 | 2 | 38 | A:0.657895      |             | G:0.342105  |
| chr28          | 11145354 | 2 | 38 | A:0.394737      |             | G:0.605263  |
| chr28          | 11145417 | 2 | 40 | T:0.85          | C:0.15      |             |
| chr28          | 11145436 | 2 | 40 | T:0.275         | C:0.725     |             |
| chr28          | 11145448 | 2 | 40 | C:0.95          | A:0.05      |             |
| chr28          | 11145545 | 2 | 38 | G:0.289474      |             | T:0.710526  |
| chr28          | 11145690 | 2 | 34 | C:0.5           | G:0.5       |             |
| chr28          | 11146295 | 2 | 38 | C:0.552632      |             | T:0.447368  |
| chr28          | 11146472 | 2 | 40 | C:0.625         | A:0.375     |             |
| chr28          | 11146594 | 2 | 38 | C:0.263158      |             | A:0.736842  |
| chr28          | 11146971 | 2 | 38 | G:0.289474      |             | GA:0.710526 |
| chr28          | 11146974 | 4 | 40 | G:0.25          | GGGAGA:0.25 |             |
| GGGAGAGA:0.15  |          |   |    | GGGAGAGAGA:0.35 |             |             |
| chr28          | 11147054 | 2 | 36 | C:0.583333      |             | T:0.416667  |
| chr28          | 11147463 | 2 | 36 | T:1             | G:0         |             |
| chr28          | 11147800 | 2 | 36 | T:0.888889      |             | C:0.111111  |
| chr28          | 11147871 | 2 | 38 | G:0.842105      |             | T:0.157895  |
| chr28          | 11148705 | 2 | 38 | A:0.789474      |             | G:0.210526  |
| chr28          | 11148781 | 2 | 36 | C:0.777778      |             | T:0.222222  |
| chr28          | 11149467 | 2 | 38 | C:0.184211      |             | G:0.815789  |
| chr28          | 11149894 | 2 | 40 | CT:0.775        | C:0.225     |             |
| chr28          | 11149941 | 2 | 34 | G:0.941176      |             | A:0.0588235 |
| chr28          | 11150015 | 2 | 40 | T:0.85          | C:0.15      |             |
| chr28          | 11150447 | 2 | 40 | T:0.75          | C:0.25      |             |
| chr28          | 11150546 | 2 | 38 | G:0.394737      |             | A:0.605263  |
| chr28          | 11150858 | 2 | 40 | G:1             | A:0         |             |
| chr28          | 11151445 | 2 | 40 | G:0.35          | GGA:0.65    |             |
| chr28          | 11151693 | 2 | 36 | C:0.833333      |             | G:0.166667  |
| chr28          | 11151793 | 2 | 38 | C:0.789474      |             | T:0.210526  |
| chr28          | 11151986 | 2 | 38 | C:0.815789      |             | A:0.184211  |
| chr28          | 11152066 | 2 | 40 | C:0             | T:1         |             |
| chr28          | 11152200 | 2 | 38 | G:0.815789      |             | A:0.184211  |
| chr28          | 11152206 | 3 | 38 | CTT:0.552632    |             | C:0.184211  |
| CTTTT:0.263158 |          |   |    |                 |             |             |
| chr28          | 11152336 | 2 | 38 | G:1             | A:0         |             |
| chr28          | 11152348 | 2 | 40 | C:0.85          | T:0.15      |             |
| chr28          | 11152491 | 2 | 36 | T:0.555556      |             | A:0.444444  |
| chr28          | 11152563 | 2 | 38 | CAAAT:1         | C:0         |             |
| chr28          | 11152752 | 2 | 38 | T:0.868421      |             | C:0.131579  |
| chr28          | 11153222 | 2 | 40 | A:0.775         | G:0.225     |             |

|       |          |   |    |             |          |                                   |
|-------|----------|---|----|-------------|----------|-----------------------------------|
| chr28 | 11153233 | 2 | 40 | G:0.75      | T:0.25   |                                   |
| chr28 | 11153341 | 2 | 38 | G:0.868421  |          | A:0.131579                        |
| chr28 | 11153357 | 2 | 38 | A:0.815789  |          | G:0.184211                        |
| chr28 | 11153836 | 2 | 38 | T:0.842105  |          | G:0.157895                        |
| chr28 | 11153872 | 2 | 40 | T:0.775     | C:0.225  |                                   |
| chr28 | 11154148 | 2 | 36 | C:0.694444  |          | T:0.305556                        |
| chr28 | 11154154 | 2 | 36 | A:0.694444  |          | T:0.305556                        |
| chr28 | 11154158 | 2 | 36 | C:0.277778  |          | T:0.722222                        |
| chr28 | 11154931 | 2 | 40 | G:0.425     | T:0.575  |                                   |
| chr28 | 11155137 | 2 | 40 | TA:0.525    | T:0.475  |                                   |
| chr28 | 11155363 | 2 | 40 | T:0         | TC:1     |                                   |
| chr28 | 11155369 | 2 | 40 | CA:0        | C:1      |                                   |
| chr28 | 11155378 | 2 | 40 | G:0         | GT:1     |                                   |
| chr28 | 11155382 | 2 | 40 | CT:0        | C:1      |                                   |
| chr28 | 11156260 | 2 | 38 | C:0.736842  |          | A:0.263158                        |
| chr28 | 11156387 | 2 | 36 | TA:0.666667 |          | T:0.333333                        |
| chr28 | 11157509 | 2 | 36 | G:0.638889  |          | A:0.361111                        |
| chr28 | 11157784 | 2 | 32 | A:0.84375   |          | T:0.15625                         |
| chr28 | 11157947 | 2 | 40 | G:0.475     | A:0.525  |                                   |
| chr28 | 11158269 | 2 | 40 | C:0.75      | G:0.25   |                                   |
| chr28 | 11158274 | 2 | 40 | C:0.75      | A:0.25   |                                   |
| chr28 | 11158471 | 2 | 40 | TC:0.925    | T:0.075  |                                   |
| chr28 | 11159109 | 2 | 38 | T:0.5       | C:0.5    |                                   |
| chr28 | 11159293 | 2 | 30 | G:0.8       | A:0.2    |                                   |
| chr28 | 11159412 | 2 | 38 | G:0.5       | T:0.5    |                                   |
| chr28 | 11159430 | 2 | 36 | T:0.472222  |          | C:0.527778                        |
| chr28 | 11159637 | 2 | 38 | C:0.815789  |          | T:0.184211                        |
| chr28 | 11159720 | 2 | 40 | T:0         | TA:1     |                                   |
| chr28 | 11159746 | 2 | 38 | T:0         | A:1      |                                   |
| chr28 | 11159748 | 2 | 38 | T:0         | G:1      |                                   |
| chr28 | 11159924 | 2 | 38 | T:0.789474  |          | C:0.210526                        |
| chr28 | 11160453 | 3 | 40 | GTTT:0.25   |          | G:0.475 GTTTT:<br>0.275           |
| chr28 | 11160461 | 2 | 40 | T:0.525     | A:0.475  |                                   |
| chr28 | 11160509 | 2 | 38 | G:0.815789  |          | T:0.184211                        |
| chr28 | 11160610 | 2 | 36 | C:0.527778  |          | T:0.472222                        |
| chr28 | 11160754 | 2 | 40 | A:0.475     | T:0.525  |                                   |
| chr28 | 11161130 | 2 | 36 | C:0.75      | T:0.25   |                                   |
| chr28 | 11161179 | 2 | 36 | C:0.722222  |          | T:0.277778                        |
| chr28 | 11161218 | 2 | 36 | G:0.527778  |          | A:0.472222                        |
| chr28 | 11161643 | 2 | 36 | T:0.777778  |          | C:0.222222                        |
| chr28 | 11161658 | 2 | 30 | T:0.8       | TTTC:0.2 |                                   |
| chr28 | 11161676 | 3 | 34 | C:0.470588  |          | CTTCT:0.117647<br>CTTCTT:0.411765 |
| chr28 | 11161715 | 2 | 26 | G:0.423077  |          | GGA:0.576923                      |
| chr28 | 11161760 | 2 | 24 | G:0.416667  |          | T:0.583333                        |
| chr28 | 11162339 | 2 | 38 | T:0.526316  |          | C:0.473684                        |
| chr28 | 11162664 | 2 | 38 | G:0.789474  |          | A:0.210526                        |
| chr28 | 11162702 | 2 | 40 | A:0.5       | G:0.5    |                                   |
| chr28 | 11162782 | 2 | 38 | A:0.394737  |          | C:0.605263                        |
| chr28 | 11162799 | 2 | 40 | T:0.375     | C:0.625  |                                   |
| chr28 | 11163218 | 2 | 38 | G:0.763158  |          | A:0.236842                        |
| chr28 | 11163562 | 2 | 38 | T:0.684211  |          | C:0.315789                        |
| chr28 | 11163603 | 2 | 40 | G:0.275     | C:0.725  |                                   |



|       |          |   |    |                                 |                        |                           |
|-------|----------|---|----|---------------------------------|------------------------|---------------------------|
| chr28 | 11175147 | 2 | 40 | G:0.625                         | A:0.375                |                           |
| chr28 | 11175525 | 2 | 40 | AACTATGC:0.575                  | A:0.425                |                           |
| chr28 | 11176031 | 2 | 36 | C:0.666667                      | T:0.333333             |                           |
| chr28 | 11177011 | 2 | 38 | C:0.657895                      | T:0.342105             |                           |
| chr28 | 11177390 | 2 | 38 | A:0.289474                      | G:0.710526             |                           |
| chr28 | 11178063 | 2 | 38 | G:0.263158                      | A:0.736842             |                           |
| chr28 | 11178400 | 2 | 40 | C:0.8                           | T:0.2                  |                           |
| chr28 | 11178599 | 2 | 38 | A:0.710526                      | G:0.289474             |                           |
| chr28 | 11178762 | 2 | 38 | G:0.710526                      | A:0.289474             |                           |
| chr28 | 11179142 | 2 | 40 | A:0.8                           | C:0.2                  |                           |
| chr28 | 11179183 | 2 | 40 | T:0                             | C:1                    |                           |
| chr28 | 11179361 | 2 | 38 | T:0.684211                      | C:0.315789             |                           |
| chr28 | 11180159 | 2 | 40 | G:0.95                          | GT:0.05                |                           |
| chr28 | 11180194 | 3 | 40 | CAA:0.025                       | C:0.225                | CA:0.75                   |
| chr28 | 11180350 | 2 | 40 | GGGA:0.75                       | G:0.25                 |                           |
| chr28 | 11181319 | 2 | 32 | AC:0.6875                       | A:0.3125               |                           |
| chr28 | 11181590 | 2 | 36 | C:0.694444                      | T:0.305556             |                           |
| chr28 | 11182207 | 2 | 38 | T:0.763158                      | C:0.236842             |                           |
| chr28 | 11182463 | 2 | 38 | G:0.736842                      | A:0.263158             |                           |
| chr28 | 11183194 | 2 | 38 | T:0.763158                      | C:0.236842             |                           |
| chr28 | 11183281 | 2 | 40 | C:0.925                         | T:0.075                |                           |
| chr28 | 11183904 | 2 | 40 | A:0.425                         | G:0.575                |                           |
| chr28 | 11183920 | 2 | 40 | A:1                             | ATGCTTTGCTT:0          |                           |
| chr28 | 11183967 | 2 | 40 | T:0.95                          | TCTTTTCTTTTCTTTTCTTTC: |                           |
|       |          |   |    | 0.05                            |                        |                           |
| chr28 | 11184001 | 2 | 40 | T:0.95                          | TCTTTTCTTTC:0.05       |                           |
| chr28 | 11184021 | 3 | 40 | T:0.7                           |                        |                           |
|       |          |   |    | TTTTCTTTCTTTCTTTCTTTCTTTC:0.225 |                        | TTTTCTTTCTTTCTTTCTTTCTTC: |
|       |          |   |    | 0.075                           |                        |                           |
| chr28 | 11184055 | 2 | 40 | T:0.925                         | TTCTTTCTTTCTTTC:0.075  |                           |
| chr28 | 11184072 | 2 | 40 | C:0.925                         | T:0.075                |                           |
| chr28 | 11184191 | 2 | 32 | C:0.78125                       | A:0.21875              |                           |
| chr28 | 11184323 | 2 | 40 | C:0.45                          | A:0.55                 |                           |
| chr28 | 11184763 | 2 | 40 | G:0.675                         | C:0.325                |                           |
| chr28 | 11184784 | 2 | 40 | G:0.75                          | A:0.25                 |                           |
| chr28 | 11184800 | 2 | 40 | T:0.75                          | C:0.25                 |                           |
| chr28 | 11184949 | 2 | 38 | A:0.631579                      | AT:0.368421            |                           |
| chr28 | 11185127 | 2 | 36 | T:1                             | C:0                    |                           |
| chr28 | 11185181 | 2 | 40 | A:0.65                          | T:0.35                 |                           |
| chr28 | 11185384 | 3 | 34 | A:0.411765                      | AGT:0.352941           |                           |
|       |          |   |    | AGTGT:0.235294                  |                        |                           |
| chr28 | 11185526 | 2 | 36 | A:0.666667                      | G:0.333333             |                           |
| chr28 | 11186189 | 2 | 38 | AG:0.947368                     | A:0.0526316            |                           |
| chr28 | 11186315 | 2 | 40 | T:0.6                           | G:0.4                  |                           |
| chr28 | 11186991 | 2 | 38 | A:0.368421                      | AT:0.631579            |                           |
| chr28 | 11187145 | 2 | 38 | T:0.684211                      | A:0.315789             |                           |
| chr28 | 11187384 | 3 | 36 | TAC:0.305556                    | T:0.305556             |                           |
|       |          |   |    | TACAC:0.388889                  |                        |                           |
| chr28 | 11187441 | 2 | 38 | T:0.657895                      | C:0.342105             |                           |
| chr28 | 11187765 | 2 | 36 | A:0.861111                      | G:0.138889             |                           |
| chr28 | 11187923 | 2 | 40 | A:0.95                          | G:0.05                 |                           |
| chr28 | 11188230 | 2 | 40 | A:0.3                           | T:0.7                  |                           |
| chr28 | 11188254 | 2 | 40 | T:0.675                         | TTG:0.325              |                           |
| chr28 | 11188271 | 2 | 40 | A:0.05                          | T:0.95                 |                           |

|       |          |   |    |                  |               |
|-------|----------|---|----|------------------|---------------|
| chr28 | 11188390 | 2 | 38 | T:0.973684       | C:0.0263158   |
| chr28 | 11188604 | 2 | 34 | A:1 AT:0         |               |
| chr28 | 11188775 | 2 | 40 | C:0.925 T:0.075  |               |
| chr28 | 11189214 | 2 | 38 | C:0.973684       | T:0.0263158   |
| chr28 | 11189290 | 2 | 36 | A:0.472222       | ATGC:0.527778 |
| chr28 | 11189444 | 2 | 40 | AC:0.975 A:0.025 |               |
| chr28 | 11189943 | 2 | 38 | A:0.263158       | G:0.736842    |
| chr28 | 11189985 | 2 | 40 | G:1 C:0          |               |
| chr28 | 11190134 | 2 | 40 | G:0.675 C:0.325  |               |
| chr28 | 11190159 | 2 | 40 | T:0.95 A:0.05    |               |
| chr28 | 11190487 | 2 | 38 | A:0.368421       | G:0.631579    |
| chr28 | 11190612 | 2 | 40 | C:0.675 T:0.325  |               |
| chr28 | 11191046 | 2 | 38 | C:0.789474       | A:0.210526    |
| chr28 | 11191548 | 2 | 38 | G:1 A:0          |               |
| chr28 | 11191866 | 2 | 40 | A:0.825 G:0.175  |               |
| chr28 | 11191907 | 2 | 38 | A:0.973684       | G:0.0263158   |
| chr28 | 11192501 | 2 | 40 | T:0.325 C:0.675  |               |
| chr28 | 11193109 | 2 | 36 | G:0.944444       | A:0.0555556   |
| chr28 | 11193126 | 2 | 36 | C:1 T:0          |               |
| chr28 | 11193387 | 2 | 40 | A:0 C:1          |               |
| chr28 | 11193427 | 2 | 40 | C:0.975 T:0.025  |               |
| chr28 | 11193547 | 2 | 38 | A:0.921053       | G:0.0789474   |
| chr28 | 11193767 | 2 | 38 | C:0.973684       | G:0.0263158   |
| chr28 | 11194490 | 2 | 40 | C:0.6 T:0.4      |               |
| chr28 | 11194601 | 2 | 38 | G:0.789474       | A:0.210526    |
| chr28 | 11194606 | 2 | 38 | C:0.0263158      | CA:0.973684   |
| chr28 | 11194629 | 2 | 38 | C:0.973684       | T:0.0263158   |
| chr28 | 11194866 | 2 | 40 | G:0.975 A:0.025  |               |
| chr28 | 11195436 | 2 | 26 | CG:0.692308      | C:0.307692    |
| chr28 | 11195609 | 2 | 38 | A:1 T:0          |               |
| chr28 | 11195630 | 2 | 38 | T:1 A:0          |               |
| chr28 | 11195750 | 2 | 36 | TTC:0.611111     | T:0.388889    |
| chr28 | 11195893 | 2 | 38 | C:0.710526       | T:0.289474    |
| chr28 | 11196142 | 2 | 38 | C:0.736842       | T:0.263158    |
| chr28 | 11196217 | 2 | 40 | T:0.25 C:0.75    |               |
| chr28 | 11196473 | 2 | 40 | T:0.55 C:0.45    |               |
| chr28 | 11196601 | 2 | 38 | CTG:0.947368     | C:0.0526316   |
| chr28 | 11197557 | 2 | 38 | C:0.973684       | G:0.0263158   |
| chr28 | 11197560 | 2 | 38 | T:0.736842       | C:0.263158    |
| chr28 | 11197658 | 2 | 40 | A:0.95 G:0.05    |               |
| chr28 | 11198089 | 2 | 40 | G:0.95 A:0.05    |               |
| chr28 | 11198252 | 2 | 40 | T:0.975 A:0.025  |               |
| chr28 | 11198341 | 2 | 40 | TTA:0.775        | T:0.225       |
| chr28 | 11198570 | 2 | 38 | T:0.789474       | C:0.210526    |
| chr28 | 11198628 | 2 | 40 | A:0.375 G:0.625  |               |
| chr28 | 11198887 | 2 | 38 | T:0.684211       | C:0.315789    |
| chr28 | 11199236 | 2 | 38 | AAAG:1 A:0       |               |
| chr28 | 11199522 | 2 | 38 | T:0.315789       | TAC:0.684211  |
| chr28 | 11199864 | 2 | 32 | A:0.71875        | T:0.28125     |
| chr28 | 11199915 | 2 | 34 | T:0.264706       | C:0.735294    |
| chr28 | 11200037 | 2 | 40 | C:0.75 T:0.25    |               |
| chr28 | 11200262 | 2 | 38 | T:0.368421       | A:0.631579    |
| chr28 | 11200286 | 2 | 38 | C:0.973684       | T:0.0263158   |
| chr28 | 11200366 | 2 | 38 | C:1 T:0          |               |

|              |          |   |    |                               |              |
|--------------|----------|---|----|-------------------------------|--------------|
| chr28        | 11200434 | 2 | 36 | ATAG:0.694444                 | A:0.305556   |
| chr28        | 11200515 | 2 | 40 | A:0.95 C:0.05                 |              |
| chr28        | 11200585 | 2 | 36 | A:0.694444                    | AAG:0.305556 |
| chr28        | 11200769 | 2 | 34 | AT:0.764706                   | A:0.235294   |
| chr28        | 11200827 | 2 | 38 | C:0.973684                    | T:0.0263158  |
| chr28        | 11201104 | 2 | 36 | G:0.833333                    | A:0.166667   |
| chr28        | 11201365 | 2 | 38 | T:1 C:0                       |              |
| chr28        | 11201602 | 2 | 40 | T:0.9 C:0.1                   |              |
| chr28        | 11201640 | 2 | 38 | C:0.973684                    | T:0.0263158  |
| chr28        | 11201650 | 2 | 38 | A:0.736842                    | G:0.263158   |
| chr28        | 11201836 | 2 | 40 | G:0.6 A:0.4                   |              |
| chr28        | 11202021 | 2 | 38 | CAAAA:0.894737                | C:0.105263   |
| chr28        | 11202039 | 2 | 38 | CAA:0.894737                  | C:0.105263   |
| chr28        | 11202048 | 2 | 40 | C:0.725 A:0.275               |              |
| chr28        | 11202051 | 2 | 38 | AAAAAAC:0.894737              | A:0.105263   |
| chr28        | 11202054 | 3 | 40 | A:0.725 AAC:0.25 AACAAC:0.025 |              |
| chr28        | 11202060 | 2 | 40 | A:0.85 C:0.15                 |              |
| chr28        | 11202122 | 2 | 32 | C:0.625 T:0.375               |              |
| chr28        | 11202791 | 2 | 40 | T:0.325 C:0.675               |              |
| chr28        | 11202793 | 2 | 40 | G:1 T:0                       |              |
| chr28        | 11203019 | 2 | 36 | G:0.805556                    | T:0.194444   |
| chr28        | 11203521 | 2 | 36 | A:0.222222                    | G:0.777778   |
| chr28        | 11203603 | 2 | 40 | T:0.725 C:0.275               |              |
| chr28        | 11204127 | 2 | 38 | A:0.684211                    | G:0.315789   |
| chr28        | 11204563 | 2 | 38 | A:1 T:0                       |              |
| chr28        | 11204776 | 2 | 38 | G:0.631579                    | A:0.368421   |
| chr28        | 11204816 | 2 | 38 | T:0.315789                    | A:0.684211   |
| chr28        | 11205012 | 2 | 38 | ATGTC:1 A:0                   |              |
| chr28        | 11205127 | 2 | 38 | A:0.736842                    | G:0.263158   |
| chr28        | 11205576 | 2 | 40 | C:0.6 T:0.4                   |              |
| chr28        | 11205841 | 2 | 40 | A:0.95 C:0.05                 |              |
| chr28        | 11206426 | 2 | 40 | A:0.325 G:0.675               |              |
| chr28        | 11206441 | 2 | 40 | T:1 G:0                       |              |
| chr28        | 11207252 | 2 | 38 | T:1 G:0                       |              |
| chr28        | 11207309 | 2 | 38 | A:1 T:0                       |              |
| chr28        | 11207665 | 2 | 40 | A:0 C:1                       |              |
| chr28        | 11207955 | 2 | 40 | C:1 T:0                       |              |
| chr28        | 11208138 | 2 | 40 | A:0.7 T:0.3                   |              |
| chr28        | 11208478 | 3 | 40 | TA:0.325 T:0.425 TAA:0.25     |              |
| chr28        | 11209025 | 2 | 38 | C:1 T:0                       |              |
| chr28        | 11209347 | 2 | 38 | G:0 A:1                       |              |
| chr28        | 11209461 | 2 | 38 | G:0 A:1                       |              |
| chr28        | 11209546 | 2 | 38 | C:0.947368                    | T:0.0526316  |
| chr28        | 11209700 | 2 | 40 | G:0.975 A:0.025               |              |
| chr28        | 11209761 | 2 | 40 | C:1 A:0                       |              |
| chr28        | 11210712 | 2 | 40 | G:0.925 T:0.075               |              |
| chr28        | 11211044 | 2 | 40 | C:0.875 T:0.125               |              |
| chr28        | 11211268 | 2 | 40 | G:0 GAACAA:1                  |              |
| chr28        | 11211479 | 2 | 40 | G:0.7 A:0.3                   |              |
| chr28        | 11211761 | 2 | 38 | G:1 A:0                       |              |
| chr28        | 11211804 | 2 | 38 | CT:0.736842                   | C:0.263158   |
| chr28        | 11211807 | 3 | 38 | TAA:0.263158                  | T:0.710526   |
| TA:0.0263158 |          |   |    |                               |              |
| chr28        | 11211844 | 2 | 38 | A:0.631579                    | AGAGAGAGC:   |

|               |            |              |                    |              |
|---------------|------------|--------------|--------------------|--------------|
| 0.368421      |            |              |                    |              |
| chr28         | 11212061 2 | 38           | G:0.710526         | A:0.289474   |
| chr28         | 11212096 2 | 38           | C:1 A:0            |              |
| chr28         | 11212224 3 | 36           | A:0.694444         | AT:0.25 ATT: |
| 0.0555556     |            |              |                    |              |
| chr28         | 11212567 2 | 38           | G:0.947368         | A:0.0526316  |
| chr28         | 11212891 2 | 38           | G:0.973684         | A:0.0263158  |
| chr28         | 11213287 2 | 40           | C:1 T:0            |              |
| chr28         | 11213555 2 | 38           | A:0.973684         | G:0.0263158  |
| chr28         | 11213752 2 | 34           | T:0.352941         | C:0.647059   |
| chr28         | 11214289 2 | 36           | C:0.694444         | T:0.305556   |
| chr28         | 11214381 2 | 36           | AAGG:0.777778      | A:0.222222   |
| chr28         | 11215670 2 | 40           | A:0.225 G:0.775    |              |
| chr28         | 11215677 2 | 40           | G:0.575 A:0.425    |              |
| chr28         | 11215769 2 | 38           | G:0.763158         | A:0.236842   |
| chr28         | 11215833 4 | 38           | CTTTT:0.131579     | C:0.263158   |
| CT:0.421053   |            | CTT:0.184211 |                    |              |
| chr28         | 11216573 2 | 36           | C:0.944444         | T:0.0555556  |
| chr28         | 11216594 2 | 36           | T:0 C:1            |              |
| chr28         | 11216783 2 | 36           | C:0.611111         | T:0.388889   |
| chr28         | 11217136 2 | 36           | C:0.722222         | CT:0.277778  |
| chr28         | 11217137 2 | 36           | T:0.777778         | TTC:0.222222 |
| chr28         | 11217798 2 | 40           | A:0.675 T:0.325    |              |
| chr28         | 11217871 2 | 36           | C:0.388889         | T:0.611111   |
| chr28         | 11217999 2 | 38           | A:0.289474         | C:0.710526   |
| chr28         | 11218337 2 | 38           | A:0.526316         | G:0.473684   |
| chr28         | 11218584 2 | 38           | G:0.315789         | A:0.684211   |
| chr28         | 11218635 2 | 40           | G:0.25 A:0.75      |              |
| chr28         | 11218794 2 | 38           | C:0.315789         | A:0.684211   |
| chr28         | 11218823 2 | 40           | G:0.625 A:0.375    |              |
| chr28         | 11218863 2 | 40           | C:0 A:1            |              |
| chr28         | 11219026 2 | 38           | T:0.473684         | G:0.526316   |
| chr28         | 11219082 2 | 36           | G:0.333333         | A:0.666667   |
| chr28         | 11219280 2 | 34           | C:0.764706         | G:0.235294   |
| chr28         | 11219290 2 | 36           | A:0.583333         | G:0.416667   |
| chr28         | 11219442 2 | 38           | CA:0.657895        | C:0.342105   |
| chr28         | 11219505 2 | 34           | C:0.676471         | T:0.323529   |
| chr28         | 11219509 2 | 34           | A:0.676471         | G:0.323529   |
| chr28         | 11219847 3 | 36           | GT:0.388889        | G:0.25 GTT:  |
| 0.361111      |            |              |                    |              |
| chr28         | 11220133 2 | 40           | C:0.725 T:0.275    |              |
| chr28         | 11220284 2 | 40           | C:0.975 T:0.025    |              |
| chr28         | 11220447 2 | 40           | C:0.675 T:0.325    |              |
| chr28         | 11220625 2 | 40           | C:0.7 T:0.3        |              |
| chr28         | 11220870 2 | 40           | A:0.675 C:0.325    |              |
| chr28         | 11220884 2 | 38           | A:0.710526         | G:0.289474   |
| chr28         | 11220953 2 | 36           | G:0.666667         | A:0.333333   |
| chr28         | 11221023 2 | 40           | T:0.625 C:0.375    |              |
| chr28         | 11221156 2 | 40           | C:0.975 G:0.025    |              |
| chr28         | 11221493 3 | 36           | C:0.305556         | CT:0.611111  |
| CTT:0.0833333 |            |              |                    |              |
| chr28         | 11221594 3 | 38           | GTCTCTC:0.552632   | G:0.368421   |
| GTC:0.0789474 |            |              |                    |              |
| chr28         | 11221603 2 | 34           | TCTCTCACA:0.941176 | T:           |



0.0588235

|       |               |    |                               |               |
|-------|---------------|----|-------------------------------|---------------|
| chr28 | 11221609 2    | 38 | T:0.710526                    | A:0.289474    |
| chr28 | 11222176 2    | 40 | G:0.65 T:0.35                 |               |
| chr28 | 11222232 2    | 40 | CAG:0.975                     | C:0.025       |
| chr28 | 11222269 2    | 40 | C:0.725 T:0.275               |               |
| chr28 | 11222455 2    | 38 | T:0.368421                    | C:0.631579    |
| chr28 | 11222692 2    | 38 | G:0.315789                    | A:0.684211    |
| chr28 | 11222935 2    | 36 | G:1 A:0                       |               |
| chr28 | 11222971 2    | 38 | T:0.263158                    | C:0.736842    |
| chr28 | 11223019 2    | 40 | A:0.725 ACCCCCATTCACCCT:0.275 |               |
| chr28 | 11223059 2    | 40 | A:0.375 C:0.625               |               |
| chr28 | 11223154 2    | 38 | G:0.368421                    | A:0.631579    |
| chr28 | 11223202 2    | 38 | T:0.421053                    | G:0.578947    |
| chr28 | 11223225 2    | 38 | T:0.947368                    | G:0.0526316   |
| chr28 | 11223363 2    | 38 | C:0.631579                    | T:0.368421    |
| chr28 | 11223455 2    | 40 | T:0.625 C:0.375               |               |
| chr28 | 11223465 2    | 40 | G:0.625 A:0.375               |               |
| chr28 | 11223475 2    | 40 | G:0.975 A:0.025               |               |
| chr28 | 11224210 2    | 36 | T:0.972222                    | C:0.0277778   |
| chr28 | 11224549 2    | 38 | C:0.973684                    | T:0.0263158   |
| chr28 | 11225235 2    | 38 | A:0.605263                    | G:0.394737    |
| chr28 | 11225598 2    | 40 | C:0.925 T:0.075               |               |
| chr28 | 11225914 2    | 34 | C:0.676471                    | CCCA:0.323529 |
| chr28 | 11226115 2    | 40 | A:1 T:0                       |               |
| chr28 | 11226301 2    | 34 | C:0.647059                    | T:0.352941    |
| chr28 | 11228114 2    | 26 | G:0.615385                    | GC:0.384615   |
| chr28 | 11228121 2    | 30 | CG:0.933333                   | C:0.0666667   |
| chr28 | 11228125 2    | 30 | C:0.566667                    | G:0.433333    |
| chr28 | 11228255 2    | 24 | T:0.541667                    | A:0.458333    |
| chr28 | 11228427 2    | 32 | G:0.9375 C:0.0625             |               |
| chr28 | 11228779 4    | 40 | AAC:0.725                     | A:0.05 AACAC: |
| 0.025 | AACACACAC:0.2 |    |                               |               |
| chr28 | 11229233 2    | 38 | C:1 T:0                       |               |
| chr28 | 11229617 2    | 38 | A:0 T:1                       |               |
| chr28 | 11229875 2    | 36 | C:0.638889                    | A:0.361111    |
| chr28 | 11229901 2    | 38 | T:0.631579                    | C:0.368421    |
| chr28 | 11229938 2    | 38 | G:0.684211                    | GC:0.315789   |
| chr28 | 11230222 2    | 40 | C:0.375 T:0.625               |               |
| chr28 | 11230368 2    | 38 | T:0.973684                    | C:0.0263158   |
| chr28 | 11230391 2    | 38 | A:1 C:0                       |               |
| chr28 | 11230393 2    | 38 | TC:1 T:0                      |               |
| chr28 | 11230722 2    | 36 | C:0.388889                    | T:0.611111    |
| chr28 | 11230730 2    | 36 | C:0.972222                    | T:0.0277778   |
| chr28 | 11230739 2    | 34 | C:0 T:1                       |               |
| chr28 | 11230799 2    | 40 | GTGTCTCTGTCTC:0.525           | G:0.475       |
| chr28 | 11230977 2    | 38 | C:0.684211                    | T:0.315789    |
| chr28 | 11231111 2    | 40 | A:0 G:1                       |               |
| chr28 | 11231332 2    | 38 | T:0.736842                    | G:0.263158    |
| chr28 | 11231353 2    | 40 | AC:1 A:0                      |               |
| chr28 | 11231357 3    | 40 | A:0.975 C:0                   | AAC:0.025     |
| chr28 | 11231362 3    | 40 | C:0.575 A:0.425               | CA:0          |
| chr28 | 11231364 2    | 40 | AAC:0.975                     | A:0.025       |
| chr28 | 11231505 2    | 40 | C:0.7 T:0.3                   |               |
| chr28 | 11231888 2    | 38 | T:0.631579                    | C:0.368421    |

|       |           |   |    |             |           |             |
|-------|-----------|---|----|-------------|-----------|-------------|
| chr28 | 11231912  | 2 | 40 | G:0.575     | A:0.425   |             |
| chr28 | 11232195  | 2 | 38 | G:1         | A:0       |             |
| chr28 | 11232372  | 2 | 36 | C:0.694444  |           | G:0.305556  |
| chr28 | 11232389  | 2 | 34 | C:0.352941  |           | T:0.647059  |
| chr28 | 11232628  | 2 | 38 | C:0.657895  |           | T:0.342105  |
| chr28 | 11232632  | 2 | 38 | T:0.657895  |           | C:0.342105  |
| chr28 | 11232796  | 2 | 40 | A:0.625     | G:0.375   |             |
| chr28 | 11232823  | 2 | 38 | A:0.947368  |           | G:0.0526316 |
| chr28 | 11232935  | 2 | 38 | C:0.552632  |           | T:0.447368  |
| chr28 | 11233037  | 2 | 40 | A:0.65      | G:0.35    |             |
| chr28 | 11233049  | 2 | 40 | A:0.65      | G:0.35    |             |
| chr28 | 11233051  | 2 | 40 | T:0.65      | C:0.35    |             |
| chr28 | 11233069  | 2 | 40 | T:0.65      | C:0.35    |             |
| chr28 | 11233204  | 2 | 40 | G:0.925     | T:0.075   |             |
| chr28 | 11233366  | 2 | 36 | A:0.611111  |           | T:0.388889  |
| chr28 | 11233477  | 2 | 38 | C:0.394737  |           | T:0.605263  |
| chr28 | 11234054  | 3 | 38 | T:0.605263  |           | TA:0.368421 |
| TAA:  | 0.0263158 |   |    |             |           |             |
| chr28 | 11234137  | 2 | 36 | A:0.0833333 |           | C:0.916667  |
| chr28 | 11234325  | 2 | 36 | C:0.611111  |           | G:0.388889  |
| chr28 | 11234378  | 2 | 40 | G:0.625     | T:0.375   |             |
| chr28 | 11234982  | 2 | 36 | G:0.444444  |           | A:0.555556  |
| chr28 | 11234992  | 2 | 36 | G:0.444444  |           | A:0.555556  |
| chr28 | 11235094  | 2 | 32 | T:0.4375    | C:0.5625  |             |
| chr28 | 11235251  | 2 | 36 | T:0.555556  |           | C:0.444444  |
| chr28 | 11235275  | 2 | 38 | G:0.736842  |           | A:0.263158  |
| chr28 | 11235614  | 2 | 36 | A:0.583333  |           | G:0.416667  |
| chr28 | 11235736  | 2 | 36 | C:0.583333  |           | T:0.416667  |
| chr28 | 11235988  | 2 | 36 | T:0.583333  |           | C:0.416667  |
| chr28 | 11236283  | 2 | 34 | G:0.588235  |           | T:0.411765  |
| chr28 | 11236285  | 2 | 34 | G:0.588235  |           | T:0.411765  |
| chr28 | 11236615  | 2 | 38 | G:0.578947  |           | A:0.421053  |
| chr28 | 11236617  | 2 | 38 | A:0.578947  |           | C:0.421053  |
| chr28 | 11237023  | 2 | 38 | C:0.657895  |           | T:0.342105  |
| chr28 | 11237126  | 2 | 40 | A:0.625     | AT:0.375  |             |
| chr28 | 11237137  | 2 | 40 | T:0.625     | G:0.375   |             |
| chr28 | 11237162  | 2 | 40 | C:0.625     | G:0.375   |             |
| chr28 | 11237215  | 2 | 40 | A:0.625     | C:0.375   |             |
| chr28 | 11237220  | 2 | 40 | C:0.625     | G:0.375   |             |
| chr28 | 11237236  | 2 | 38 | A:0         | G:1       |             |
| chr28 | 11237285  | 2 | 40 | T:0.575     | TAA:0.425 |             |
| chr28 | 11237310  | 2 | 40 | A:0.575     | T:0.425   |             |
| chr28 | 11237500  | 2 | 36 | T:1         | C:0       |             |
| chr28 | 11237567  | 2 | 36 | A:0.527778  |           | G:0.472222  |
| chr28 | 11237652  | 2 | 34 | T:0.558824  |           | C:0.441176  |
| chr28 | 11237739  | 2 | 38 | G:1         | A:0       |             |
| chr28 | 11237785  | 2 | 38 | A:1         | T:0       |             |
| chr28 | 11237827  | 2 | 30 | A:0.6       | G:0.4     |             |
| chr28 | 11237836  | 2 | 32 | C:0.9375    | T:0.0625  |             |
| chr28 | 11237954  | 2 | 40 | G:0.625     | C:0.375   |             |
| chr28 | 11238024  | 2 | 38 | T:0.605263  |           | G:0.394737  |
| chr28 | 11238028  | 2 | 38 | G:0.605263  |           | A:0.394737  |
| chr28 | 11238594  | 2 | 38 | T:0.5       | C:0.5     |             |
| chr28 | 11238761  | 2 | 36 | G:0.638889  |           | C:0.361111  |

|                      |          |   |    |                      |          |                  |      |
|----------------------|----------|---|----|----------------------|----------|------------------|------|
| chr28                | 11238777 | 2 | 36 | C:1                  | T:0      |                  |      |
| chr28                | 11238894 | 2 | 34 | G:0.588235           |          | A:0.411765       |      |
| chr28                | 11238981 | 2 | 40 | G:0.6                | A:0.4    |                  |      |
| chr28                | 11239148 | 2 | 38 | G:0.684211           |          | A:0.315789       |      |
| chr28                | 11239320 | 2 | 38 | G:0.605263           |          | A:0.394737       |      |
| chr28                | 11239352 | 3 | 38 | GT:0.526316          |          | G:0              | GTT: |
| 0.473684             |          |   |    |                      |          |                  |      |
| chr28                | 11239856 | 2 | 40 | TA:0.925             | T:0.075  |                  |      |
| chr28                | 11240512 | 2 | 38 | C:0.684211           |          | T:0.315789       |      |
| chr28                | 11241265 | 2 | 38 | G:1                  | T:0      |                  |      |
| chr28                | 11241476 | 2 | 38 | G:0.710526           |          | A:0.289474       |      |
| chr28                | 11241518 | 2 | 36 | C:0.944444           |          | T:0.0555556      |      |
| chr28                | 11241600 | 2 | 30 | G:0.566667           |          | C:0.433333       |      |
| chr28                | 11241628 | 2 | 38 | T:0.947368           |          | TAAAAA:0.0526316 |      |
| chr28                | 11241629 | 3 | 38 | T:0.657895           |          | A:0.236842       |      |
| TAAA:0.105263        |          |   |    |                      |          |                  |      |
| chr28                | 11241715 | 2 | 40 | G:0                  | A:1      |                  |      |
| chr28                | 11241740 | 2 | 40 | A:0.375              | T:0.625  |                  |      |
| chr28                | 11241788 | 2 | 32 | T:0.65625            |          | A:0.34375        |      |
| chr28                | 11241891 | 2 | 36 | C:0.666667           |          | T:0.333333       |      |
| chr28                | 11242060 | 2 | 40 | G:0                  | T:1      |                  |      |
| chr28                | 11242096 | 2 | 38 | G:0.921053           |          | A:0.0789474      |      |
| chr28                | 11242382 | 2 | 36 | AG:0.972222          |          | A:0.0277778      |      |
| chr28                | 11243014 | 2 | 38 | T:1                  | C:0      |                  |      |
| chr28                | 11243101 | 5 | 40 | CT:0.25              | C:0.1    | CTT:0.275        |      |
| CTTT:0.05 CTTT:0.325 |          |   |    |                      |          |                  |      |
| chr28                | 11244344 | 2 | 38 | C:0.894737           |          | T:0.105263       |      |
| chr28                | 11244417 | 2 | 34 | A:1                  | G:0      |                  |      |
| chr28                | 11244560 | 2 | 36 | ATCTCTCTCTC:0.444444 |          | A:               |      |
| 0.555556             |          |   |    |                      |          |                  |      |
| chr28                | 11244902 | 2 | 40 | G:0.6                | A:0.4    |                  |      |
| chr28                | 11245275 | 2 | 38 | C:0.605263           |          | T:0.394737       |      |
| chr28                | 11245411 | 2 | 40 | G:0.65               | C:0.35   |                  |      |
| chr28                | 11245427 | 2 | 40 | C:1                  | T:0      |                  |      |
| chr28                | 11245898 | 2 | 38 | C:0.605263           |          | T:0.394737       |      |
| chr28                | 11245938 | 3 | 38 | G:0.921053           |          | A:0              | T:   |
| 0.0789474            |          |   |    |                      |          |                  |      |
| chr28                | 11245946 | 2 | 38 | C:0.684211           |          | A:0.315789       |      |
| chr28                | 11246330 | 2 | 40 | G:1                  | A:0      |                  |      |
| chr28                | 11246627 | 2 | 38 | A:1                  | G:0      |                  |      |
| chr28                | 11246725 | 2 | 38 | G:0.552632           |          | C:0.447368       |      |
| chr28                | 11246979 | 2 | 38 | T:1                  | G:0      |                  |      |
| chr28                | 11247420 | 2 | 34 | G:0.941176           |          | A:0.0588235      |      |
| chr28                | 11247430 | 2 | 36 | A:1                  | G:0      |                  |      |
| chr28                | 11247484 | 2 | 40 | G:0.65               | A:0.35   |                  |      |
| chr28                | 11247492 | 2 | 40 | T:1                  | C:0      |                  |      |
| chr28                | 11247544 | 2 | 40 | T:0.875              | C:0.125  |                  |      |
| chr28                | 11248338 | 2 | 40 | C:0.95               | T:0.05   |                  |      |
| chr28                | 11248459 | 2 | 40 | GTCAAA:0.3           |          | G:0.7            |      |
| chr28                | 11248466 | 2 | 40 | G:0.3                | GGCC:0.7 |                  |      |
| chr28                | 11248468 | 2 | 40 | C:0.3                | CAG:0.7  |                  |      |
| chr28                | 11248509 | 2 | 40 | G:0.775              | A:0.225  |                  |      |
| chr28                | 11248833 | 2 | 38 | C:0.947368           |          | T:0.0526316      |      |
| chr28                | 11248948 | 2 | 38 | G:0.921053           |          | C:0.0789474      |      |

|       |                      |    |                        |             |                 |
|-------|----------------------|----|------------------------|-------------|-----------------|
| chr28 | 11249268 2           | 40 | C:0.95                 | T:0.05      |                 |
| chr28 | 11249413 2           | 38 | C:0.921053             |             | G:0.0789474     |
| chr28 | 11249510 2           | 40 | C:0.95                 | A:0.05      |                 |
| chr28 | 11249816 2           | 40 | T:0.9                  | C:0.1       |                 |
| chr28 | 11249942 2           | 40 | T:0.875                | C:0.125     |                 |
| chr28 | 11249996 2           | 40 | T:0.525                | TTC:0.475   |                 |
| chr28 | 11250040 2           | 40 | G:0.875                | GTCTC:0.125 |                 |
| chr28 | 11250044 2           | 36 | C:1                    | CTG:0       |                 |
| chr28 | 11250047 2           | 36 | TCTCACACACACA:0.805556 |             | T:              |
|       | 0.194444             |    |                        |             |                 |
| chr28 | 11250049 2           | 36 | TCACA:1                | T:0         |                 |
| chr28 | 11250055 2           | 36 | A:1                    | T:0         |                 |
| chr28 | 11250057 2           | 36 | A:1                    | T:0         |                 |
| chr28 | 11250059 2           | 36 | A:1                    | T:0         |                 |
| chr28 | 11250061 2           | 34 | A:1                    | T:0         |                 |
| chr28 | 11250063 2           | 32 | A:1                    | T:0         |                 |
| chr28 | 11250065 2           | 32 | A:1                    | T:0         |                 |
| chr28 | 11250313 2           | 38 | C:0.947368             |             | T:0.0526316     |
| chr28 | 11250331 2           | 38 | T:0.736842             |             | C:0.263158      |
| chr28 | 11250705 2           | 40 | A:0.95                 | G:0.05      |                 |
| chr28 | 11251322 2           | 34 | T:1                    | C:0         |                 |
| chr28 | 11251447 2           | 40 | T:1                    | C:0         |                 |
| chr28 | 11251462 2           | 38 | G:0.973684             |             | A:0.0263158     |
| chr28 | 11251590 2           | 40 | GT:1                   | G:0         |                 |
| chr28 | 11251993 2           | 38 | C:1                    | T:0         |                 |
| chr28 | 11252102 2           | 40 | T:0.95                 | C:0.05      |                 |
| chr28 | 11252187 2           | 40 | C:0.7                  | G:0.3       |                 |
| chr28 | 11252656 2           | 40 | C:0.95                 | A:0.05      |                 |
| chr28 | 11252805 4           | 40 | CTTCT:0.75             |             | C:0.075 CTTTCT: |
|       | 0.15 CTTCTTTCT:0.025 |    |                        |             |                 |
| chr28 | 11252860 2           | 40 | C:1                    | CT:0        |                 |
| chr28 | 11253422 2           | 36 | G:1                    | T:0         |                 |
| chr28 | 11253544 2           | 40 | G:0.925                | C:0.075     |                 |
| chr28 | 11253727 2           | 34 | C:0.705882             |             | G:0.294118      |
| chr28 | 11253832 2           | 38 | C:0.710526             |             | T:0.289474      |
| chr28 | 11253984 2           | 38 | G:0.657895             |             | A:0.342105      |
| chr28 | 11254421 2           | 40 | C:0.925                | T:0.075     |                 |
| chr28 | 11254589 2           | 38 | G:1                    | A:0         |                 |
| chr28 | 11254881 2           | 38 | A:0.763158             |             | G:0.236842      |
| chr28 | 11255004 2           | 40 | G:1                    | C:0         |                 |
| chr28 | 11255252 2           | 38 | GC:1                   | G:0         |                 |
| chr28 | 11255254 2           | 38 | C:1                    | A:0         |                 |
| chr28 | 11255404 2           | 36 | T:0.777778             |             | C:0.222222      |
| chr28 | 11255687 2           | 36 | CT:0.972222            |             | C:0.0277778     |
| chr28 | 11255734 2           | 36 | T:0.75                 | C:0.25      |                 |
| chr28 | 11256193 2           | 38 | T:1                    | A:0         |                 |
| chr28 | 11256194 2           | 38 | A:0.578947             |             | G:0.421053      |
| chr28 | 11256428 2           | 36 | G:0.666667             |             | A:0.333333      |
| chr28 | 11256480 2           | 38 | T:0.236842             |             | A:0.763158      |
| chr28 | 11256678 2           | 40 | G:0.675                | A:0.325     |                 |
| chr28 | 11256791 2           | 28 | AG:0.892857            |             | A:0.107143      |
| chr28 | 11257115 2           | 38 | G:0.947368             |             | A:0.0526316     |
| chr28 | 11257131 2           | 36 | A:0.666667             |             | G:0.333333      |
| chr28 | 11257256 2           | 38 | A:0.631579             |             | G:0.368421      |

|                                       |          |   |    |                    |                         |
|---------------------------------------|----------|---|----|--------------------|-------------------------|
| chr28                                 | 11257622 | 2 | 38 | T:0.605263         | A:0.394737              |
| chr28                                 | 11257676 | 2 | 38 | T:0.710526         | C:0.289474              |
| chr28                                 | 11257751 | 2 | 36 | G:0.694444         | A:0.305556              |
| chr28                                 | 11257777 | 2 | 38 | T:0.657895         | C:0.342105              |
| chr28                                 | 11257868 | 2 | 40 | T:0.325            | C:0.675                 |
| chr28                                 | 11257917 | 2 | 38 | A:0.710526         | T:0.289474              |
| chr28                                 | 11257919 | 2 | 38 | A:0.710526         | C:0.289474              |
| chr28                                 | 11257986 | 2 | 38 | C:0.763158         | T:0.236842              |
| chr28                                 | 11258344 | 2 | 38 | G:0.684211         | GT:0.315789             |
| chr28                                 | 11258384 | 2 | 38 | GATGGGTAA:0.947368 | G:                      |
| 0.0526316                             |          |   |    |                    |                         |
| chr28                                 | 11258487 | 2 | 36 | C:0.916667         | T:0.0833333             |
| chr28                                 | 11258540 | 2 | 36 | A:0                | G:1                     |
| chr28                                 | 11258557 | 2 | 36 | A:0.722222         | G:0.277778              |
| chr28                                 | 11258598 | 2 | 36 | A:0                | G:1                     |
| chr28                                 | 11258631 | 2 | 38 | A:0.973684         | C:0.0263158             |
| chr28                                 | 11259057 | 2 | 38 | C:0.763158         | A:0.236842              |
| chr28                                 | 11259219 | 2 | 38 | G:1                | A:0                     |
| chr28                                 | 11259309 | 2 | 36 | C:0.972222         | T:0.0277778             |
| chr28                                 | 11259354 | 2 | 34 | T:0.323529         | C:0.676471              |
| chr28                                 | 11259463 | 2 | 38 | G:0.710526         | A:0.289474              |
| chr28                                 | 11259464 | 2 | 38 | T:0.710526         | C:0.289474              |
| chr28                                 | 11259560 | 2 | 40 | T:0.775            | TC:0.225                |
| chr28                                 | 11259577 | 3 | 40 | C:0.525            | CT:0.475                |
| CTTTTCTTTTCTTTTCT:0                   |          |   |    |                    |                         |
| chr28                                 | 11259591 | 2 | 40 | C:0.775            | CT:0.225                |
| chr28                                 | 11259596 | 4 | 40 | C:0.625            | T:0.225                 |
| CTTTTCTTTTCTTTTCTTTTCTTTTCTTCTT:0.125 |          |   |    |                    |                         |
| 0.025                                 |          |   |    |                    |                         |
| chr28                                 | 11259606 | 2 | 40 | T:0.775            | TTTC:0.225              |
| chr28                                 | 11259619 | 3 | 40 | C:0.75             | CTTTCT:0.125            |
| CTTTCTTTTCT:0.125                     |          |   |    |                    |                         |
| chr28                                 | 11259668 | 2 | 40 | TTCTC:0.75         | T:0.25                  |
| chr28                                 | 11259670 | 4 | 40 | C:0.675            | CTCCTT:0                |
| CTCCTTTCCTTTTCCTT:0.05                |          |   |    |                    |                         |
| chr28                                 | 11259675 | 2 | 40 | T:0.75             | TTTC:0.25               |
| chr28                                 | 11259784 | 2 | 38 | G:0.605263         | T:0.394737              |
| chr28                                 | 11260071 | 2 | 36 | G:0.805556         | T:0.194444              |
| chr28                                 | 11260086 | 2 | 40 | T:0.075            | TTTTAGATC:0.925         |
| chr28                                 | 11260125 | 2 | 38 | C:0.763158         | T:0.236842              |
| chr28                                 | 11260401 | 2 | 38 | CTA:0.842105       | C:0.157895              |
| chr28                                 | 11260415 | 2 | 34 | CTTT:0.911765      | C:0.0882353             |
| chr28                                 | 11260667 | 2 | 38 | G:0.342105         | A:0.657895              |
| chr28                                 | 11260926 | 2 | 40 | G:1                | A:0                     |
| chr28                                 | 11261438 | 2 | 40 | A:0.725            | AC:0.275                |
| chr28                                 | 11261560 | 2 | 38 | G:0.763158         | GTT:0.236842            |
| chr28                                 | 11261562 | 4 | 38 | A:0.315789         | AT:0.368421             |
| ATT:0.0789474                         |          |   |    |                    |                         |
| T:0.236842                            |          |   |    |                    |                         |
| chr28                                 | 11262845 | 3 | 40 | C:0.25             | CT:0.6                  |
| CTT:0.15                              |          |   |    |                    |                         |
| chr28                                 | 11263466 | 2 | 40 | G:1                | A:0                     |
| chr28                                 | 11263663 | 2 | 38 | A:1                | C:0                     |
| chr28                                 | 11263809 | 2 | 40 | C:1                | G:0                     |
| chr28                                 | 11264751 | 2 | 40 | C:0.775            | CTTTTTTTTTTTTTTTT:0.225 |
| chr28                                 | 11264822 | 2 | 38 | G:0.0263158        | C:0.973684              |

|              |          |   |    |                    |          |             |
|--------------|----------|---|----|--------------------|----------|-------------|
| chr28        | 11265008 | 2 | 40 | C:0.175            | T:0.825  |             |
| chr28        | 11265410 | 2 | 34 | C:0.205882         |          | T:0.794118  |
| chr28        | 11266285 | 2 | 40 | C:0.025            | CA:0.975 |             |
| chr28        | 11266576 | 2 | 36 | TATC:0.944444      |          | T:0.0555556 |
| chr28        | 11266609 | 3 | 38 | C:1                | CATT:0   | CATCATT:0   |
| chr28        | 11266641 | 2 | 36 | A:0.916667         |          | G:0.0833333 |
| chr28        | 11266863 | 2 | 38 | G:1                | A:0      |             |
| chr28        | 11267548 | 2 | 38 | T:1                | C:0      |             |
| chr28        | 11269073 | 2 | 40 | TTAATACCTGA:0.95   |          | T:0.05      |
| chr28        | 11269991 | 2 | 38 | C:0                | T:1      |             |
| chr28        | 11270027 | 2 | 38 | C:1                | T:0      |             |
| chr28        | 11270760 | 2 | 40 | G:1                | GAA:0    |             |
| chr28        | 11270764 | 3 | 40 | C:0                | A:0      | CA:1        |
| chr28        | 11271011 | 2 | 36 | G:1                | A:0      |             |
| chr28        | 11271584 | 2 | 38 | G:0.0789474        |          | A:0.921053  |
| chr28        | 11272131 | 2 | 30 | A:0                | G:1      |             |
| chr28        | 11272608 | 2 | 38 | G:1                | A:0      |             |
| chr28        | 11274137 | 2 | 36 | GT:0.722222        |          | G:0.277778  |
| chr28        | 11274150 | 2 | 36 | T:1                | G:0      |             |
| chr28        | 11274151 | 3 | 38 | T:0.526316         |          | G:0.447368  |
| TG:0.0263158 |          |   |    |                    |          |             |
| chr28        | 11274749 | 2 | 40 | A:0.95             | G:0.05   |             |
| chr28        | 11274914 | 2 | 36 | T:0.972222         |          | C:0.0277778 |
| chr28        | 11274951 | 2 | 40 | C:0                | T:1      |             |
| chr28        | 11274968 | 2 | 40 | A:0                | ATG:1    |             |
| chr28        | 11275014 | 2 | 40 | G:0                | A:1      |             |
| chr28        | 11275204 | 2 | 40 | A:1                | C:0      |             |
| chr28        | 11275219 | 2 | 40 | A:0.175            | G:0.825  |             |
| chr28        | 11275614 | 2 | 40 | T:0.025            | C:0.975  |             |
| chr28        | 11275639 | 2 | 38 | G:1                | A:0      |             |
| chr28        | 11276077 | 2 | 36 | C:1                | T:0      |             |
| chr28        | 11276601 | 2 | 38 | T:1                | G:0      |             |
| chr28        | 11276831 | 2 | 40 | GAAGAAC:1          |          | G:0         |
| chr28        | 11276837 | 2 | 40 | C:1                | CGTT:0   |             |
| chr28        | 11277354 | 2 | 34 | A:0.970588         |          | C:0.0294118 |
| chr28        | 11277635 | 2 | 36 | A:1                | G:0      |             |
| chr28        | 11277721 | 2 | 40 | C:1                | T:0      |             |
| chr28        | 11278420 | 2 | 40 | C:0.85             | T:0.15   |             |
| chr28        | 11278902 | 2 | 40 | G:1                | A:0      |             |
| chr28        | 11278938 | 2 | 40 | C:1                | T:0      |             |
| chr28        | 11279515 | 2 | 38 | A:1                | C:0      |             |
| chr28        | 11279669 | 2 | 34 | T:1                | C:0      |             |
| chr28        | 11279683 | 2 | 34 | T:1                | C:0      |             |
| chr28        | 11279726 | 2 | 26 | GC:0.307692        |          | G:0.692308  |
| chr28        | 11279768 | 2 | 38 | T:1                | C:0      |             |
| chr28        | 11279772 | 2 | 38 | AC:1               | A:0      |             |
| chr28        | 11279774 | 2 | 40 | C:0.05             | A:0.95   |             |
| chr28        | 11279778 | 2 | 38 | C:1                | A:0      |             |
| chr28        | 11279779 | 2 | 40 | C:0.05             | A:0.95   |             |
| chr28        | 11279780 | 2 | 38 | AAATT:1            | A:0      |             |
| chr28        | 11279784 | 2 | 40 | T:0.05             | A:0.95   |             |
| chr28        | 11279788 | 2 | 38 | CCAAACCAAACCAAAT:1 |          | C:0         |
| chr28        | 11279789 | 2 | 38 | C:0                | A:1      |             |
| chr28        | 11279794 | 2 | 38 | C:0                | A:1      |             |

|       |              |    |                  |     |  |                |
|-------|--------------|----|------------------|-----|--|----------------|
| chr28 | 11279799 2   | 38 | C:0              | A:1 |  |                |
| chr28 | 11279808 2   | 38 | C:1              | T:0 |  |                |
| chr28 | 11280003 2   | 38 | C:1              | T:0 |  |                |
| chr28 | 11280036 2   | 38 | C:1              | T:0 |  |                |
| chr28 | 11280704 2   | 36 | GAGAGGA:0.972222 |     |  | G:0.0277778    |
| chr28 | 11280712 2   | 36 | G:0.972222       |     |  | T:0.0277778    |
| chr28 | 11282085 2   | 38 | C:1              | A:0 |  |                |
| chr28 | 11282186 2   | 36 | A:0.944444       |     |  | T:0.0555556    |
| chr28 | 11282191 2   | 36 | A:1              | T:0 |  |                |
| chr28 | 11282475 2   | 40 | G:1              | C:0 |  |                |
| chr28 | 11282869 2   | 40 | G:1              | A:0 |  |                |
| chr28 | 11283417 2   | 38 | CAT:0.815789     |     |  | C:0.184211     |
| chr28 | 11284267 2   | 38 | C:0.894737       |     |  | T:0.105263     |
| chr28 | 11284521 2   | 38 | T:1              | C:0 |  |                |
| chr28 | 11284626 2   | 38 | T:1              | C:0 |  |                |
| chr28 | 11284660 3   | 40 | TAA:0.325        |     |  | T:0.075 TA:0.6 |
| chr28 | 11285707 2   | 38 | C:1              | T:0 |  |                |
| chr28 | 11286498 2   | 36 | T:0.944444       |     |  | G:0.0555556    |
| chr28 | 11287034 2   | 36 | C:0.777778       |     |  | T:0.222222     |
| chr28 | 11287104 2   | 38 | A:1              | G:0 |  |                |
| chr28 | 11287174 2   | 34 | G:1              | A:0 |  |                |
| chr28 | 11287793 2   | 32 | C:1              | A:0 |  |                |
| chr28 | 11288242 2   | 40 | C:1              | A:0 |  |                |
| chr28 | 11289043 2   | 40 | A:0              | G:1 |  |                |
| chr28 | 11289271 2   | 40 | T:0              | C:1 |  |                |
| chr28 | 11291618 2   | 34 | T:0.147059       |     |  | C:0.852941     |
| chr28 | 11291962 2   | 38 | A:0              | G:1 |  |                |
| chr28 | 11292808 2   | 36 | G:1              | A:0 |  |                |
| chr28 | 11292889 2   | 38 | C:1              | T:0 |  |                |
| chr28 | 11294552 2   | 38 | CT:0.578947      |     |  | C:0.421053     |
| chr28 | 11294976 2   | 38 | TA:0.552632      |     |  | T:0.447368     |
| chr28 | 11295338 2   | 36 | C:0.888889       |     |  | T:0.111111     |
| chr28 | 11295532 2   | 36 | C:1              | T:0 |  |                |
| chr28 | 11295568 2   | 36 | C:0.361111       |     |  | G:0.638889     |
| chr28 | 11295581 4   | 38 | CTT:0.0526316    |     |  | C:0.473684     |
|       | CT:0.0526316 |    | CTTTT:0.421053   |     |  |                |
| chr28 | 11295610 2   | 38 | A:0.631579       |     |  | G:0.368421     |
| chr28 | 11295881 2   | 38 | G:0.657895       |     |  | A:0.342105     |
| chr28 | 11296048 2   | 40 | T:0.675 G:0.325  |     |  |                |
| chr28 | 11296086 3   | 38 | AT:0.657895      |     |  | A:0.0526316    |
|       | ATT:0.289474 |    |                  |     |  |                |
| chr28 | 11296136 2   | 38 | T:0.315789       |     |  | C:0.684211     |
| chr28 | 11296485 2   | 38 | T:0.342105       |     |  | G:0.657895     |
| chr28 | 11296493 2   | 38 | GA:0.342105      |     |  | G:0.657895     |
| chr28 | 11296594 2   | 40 | G:0.75 A:0.25    |     |  |                |
| chr28 | 11296597 2   | 40 | C:0.75 T:0.25    |     |  |                |
| chr28 | 11296669 2   | 40 | T:0.7 C:0.3      |     |  |                |
| chr28 | 11296786 2   | 40 | A:0.325 G:0.675  |     |  |                |
| chr28 | 11296838 2   | 40 | C:0.5 T:0.5      |     |  |                |
| chr28 | 11296852 2   | 38 | G:0.657895       |     |  | A:0.342105     |
| chr28 | 11296855 2   | 38 | A:0.657895       |     |  | T:0.342105     |
| chr28 | 11297063 2   | 40 | C:0.4 A:0.6      |     |  |                |
| chr28 | 11297074 2   | 40 | T:0              | C:1 |  |                |
| chr28 | 11297102 2   | 38 | T:0.421053       |     |  | C:0.578947     |

|              |            |    |                 |            |             |
|--------------|------------|----|-----------------|------------|-------------|
| chr28        | 11297140 2 | 40 | A:0.325         | C:0.675    |             |
| chr28        | 11297177 2 | 40 | C:0.35          | T:0.65     |             |
| chr28        | 11297189 2 | 40 | T:0.15          | C:0.85     |             |
| chr28        | 11297276 2 | 38 | C:0.736842      |            | G:0.263158  |
| chr28        | 11297294 2 | 38 | A:0.736842      |            | C:0.263158  |
| chr28        | 11297441 2 | 40 | C:0.05          | CAAAT:0.95 |             |
| chr28        | 11297774 2 | 38 | GT:1            | G:0        |             |
| chr28        | 11297834 2 | 40 | C:0.675         | T:0.325    |             |
| chr28        | 11297841 2 | 40 | T:0             | C:1        |             |
| chr28        | 11297904 2 | 40 | A:0             | G:1        |             |
| chr28        | 11297938 2 | 40 | C:0.425         | T:0.575    |             |
| chr28        | 11298093 2 | 38 | C:0.763158      |            | T:0.236842  |
| chr28        | 11298219 2 | 40 | A:0.725         | AG:0.275   |             |
| chr28        | 11298538 2 | 40 | C:0.7           | T:0.3      |             |
| chr28        | 11299765 2 | 40 | C:0.95          | G:0.05     |             |
| chr28        | 11299866 2 | 40 | G:0.85          | A:0.15     |             |
| chr28        | 11300176 2 | 38 | G:0             | A:1        |             |
| chr28        | 11300427 2 | 40 | A:0             | G:1        |             |
| chr28        | 11300494 2 | 40 | T:0.025         | C:0.975    |             |
| chr28        | 11300518 2 | 40 | A:0.025         | G:0.975    |             |
| chr28        | 11300531 2 | 40 | G:0.025         | A:0.975    |             |
| chr28        | 11300768 2 | 36 | T:0.138889      |            | A:0.861111  |
| chr28        | 11300844 2 | 38 | C:0.0263158     |            | T:0.973684  |
| chr28        | 11301654 2 | 38 | A:1             | G:0        |             |
| chr28        | 11301685 2 | 32 | GT:0.75         | G:0.25     |             |
| chr28        | 11301776 2 | 38 | C:0.342105      |            | CT:0.657895 |
| chr28        | 11301899 2 | 40 | C:0.05          | T:0.95     |             |
| chr28        | 11302619 2 | 36 | G:0.111111      |            | C:0.888889  |
| chr28        | 11302652 2 | 38 | TGGA:0          | T:1        |             |
| chr28        | 11302682 2 | 38 | G:0.0526316     |            | A:0.947368  |
| chr28        | 11303627 2 | 38 | A:1             | G:0        |             |
| chr28        | 11304834 2 | 40 | A:0             | G:1        |             |
| chr28        | 11304909 2 | 36 | C:1             | T:0        |             |
| chr28        | 11305037 2 | 36 | A:0.0555556     |            | C:0.944444  |
| chr28        | 11305299 2 | 38 | T:0.921053      |            | G:0.0789474 |
| chr28        | 11306387 2 | 38 | T:0.973684      |            | C:0.0263158 |
| chr28        | 11306726 2 | 40 | C:0.6           | CT:0.4     |             |
| chr28        | 11306894 2 | 34 | G:1             | A:0        |             |
| chr28        | 11307128 2 | 38 | GT:0.947368     |            | G:0.0526316 |
| chr28        | 11309258 2 | 40 | C:1             | T:0        |             |
| chr28        | 11310143 2 | 38 | T:1             | A:0        |             |
| chr28        | 11310285 2 | 36 | G:0.666667      |            | A:0.333333  |
| chr28        | 11311019 2 | 38 | A:0.973684      |            | G:0.0263158 |
| chr28        | 11311182 2 | 38 | GTTTTT:0.105263 |            | G:0.894737  |
| chr28        | 11311220 2 | 32 | T:0.0625        | C:0.9375   |             |
| chr28        | 11312459 3 | 34 | TA:0.735294     |            | T:0.117647  |
| TAA:0.147059 |            |    |                 |            |             |
| chr28        | 11312919 2 | 38 | A:0.0526316     |            | G:0.947368  |
| chr28        | 11313232 2 | 40 | C:0.9           | A:0.1      |             |
| chr28        | 11313614 2 | 40 | T:0.925         | C:0.075    |             |
| chr28        | 11315504 2 | 36 | C:0.0833333     |            | G:0.916667  |
| chr28        | 11315778 2 | 40 | T:1             | C:0        |             |
| chr28        | 11315830 2 | 38 | C:0.947368      |            | A:0.0526316 |
| chr28        | 11315919 2 | 40 | CG:1            | C:0        |             |



|                            |          |   |    |                         |              |             |
|----------------------------|----------|---|----|-------------------------|--------------|-------------|
| chr28                      | 11315973 | 2 | 38 | CAG:0.973684            | C:0.0263158  |             |
| chr28                      | 11316005 | 2 | 38 | C:0.921053              | T:0.0789474  |             |
| chr28                      | 11316162 | 2 | 40 | A:0.675                 | C:0.325      |             |
| chr28                      | 11316269 | 2 | 40 | A:0.95                  | G:0.05       |             |
| chr28                      | 11316475 | 2 | 40 | A:0.5                   | G:0.5        |             |
| chr28                      | 11316585 | 2 | 28 | G:0.464286              | C:0.535714   |             |
| chr28                      | 11316604 | 2 | 26 | G:0.576923              | A:0.423077   |             |
| chr28                      | 11316863 | 2 | 32 | G:1                     | A:0          |             |
| chr28                      | 11317055 | 2 | 38 | T:0.736842              | C:0.263158   |             |
| chr28                      | 11317197 | 2 | 32 | GGTCC:0.625             | G:0.375      |             |
| chr28                      | 11317201 | 2 | 32 | CG:1                    | C:0          |             |
| chr28                      | 11317203 | 2 | 32 | TCCG:1                  | T:0          |             |
| chr28                      | 11317231 | 3 | 38 | GGTGGGCT:0.894737       | G:           |             |
| 0.105263 GGTGGGCTGTGGGCT:0 |          |   |    |                         |              |             |
| chr28                      | 11317313 | 2 | 36 | A:0.944444              | G:0.0555556  |             |
| chr28                      | 11317402 | 2 | 38 | T:0.763158              | A:0.236842   |             |
| chr28                      | 11317421 | 2 | 38 | T:0.973684              | A:0.0263158  |             |
| chr28                      | 11317602 | 2 | 36 | C:0.944444              | T:0.0555556  |             |
| chr28                      | 11317604 | 2 | 36 | T:0.972222              | TC:0.0277778 |             |
| chr28                      | 11317638 | 2 | 36 | TA:0.972222             | T:0.0277778  |             |
| chr28                      | 11317642 | 2 | 36 | A:0.111111              | T:0.888889   |             |
| chr28                      | 11317686 | 2 | 32 | A:0.09375               | AAG:0.90625  |             |
| chr28                      | 11318037 | 2 | 36 | A:0.75                  | G:0.25       |             |
| chr28                      | 11318059 | 2 | 36 | C:0.75                  | T:0.25       |             |
| chr28                      | 11318401 | 2 | 36 | C:1                     | T:0          |             |
| chr28                      | 11318755 | 2 | 38 | C:0.947368              | T:0.0526316  |             |
| chr28                      | 11318974 | 2 | 34 | C:0.411765              | CT:0.588235  |             |
| chr28                      | 11319198 | 2 | 36 | A:0.444444              | T:0.555556   |             |
| chr28                      | 11319289 | 2 | 40 | A:0.925                 | T:0.075      |             |
| chr28                      | 11319292 | 2 | 40 | T:0.875                 | A:0.125      |             |
| chr28                      | 11319395 | 2 | 32 | A:0                     | G:1          |             |
| chr28                      | 11319487 | 2 | 34 | C:0.970588              | G:0.0294118  |             |
| chr28                      | 11319777 | 2 | 40 | G:0.9                   | A:0.1        |             |
| chr28                      | 11320022 | 3 | 40 | CTATATATATATATATA:0.125 | C:0.325      |             |
| CTATATATATA:0.55           |          |   |    |                         |              |             |
| chr28                      | 11320295 | 2 | 38 | A:0.973684              | AT:0.0263158 |             |
| chr28                      | 11320463 | 2 | 34 | G:0.970588              | A:0.0294118  |             |
| chr28                      | 11320692 | 2 | 40 | A:0.8                   | AT:0.2       |             |
| chr28                      | 11321220 | 3 | 40 | CT:0.9                  | C:0.075      | CTT:0.025   |
| chr28                      | 11321302 | 2 | 40 | T:0.075                 | G:0.925      |             |
| chr28                      | 11321615 | 2 | 40 | A:0.875                 | AT:0.125     |             |
| chr28                      | 11321688 | 2 | 40 | G:0.9                   | C:0.1        |             |
| chr28                      | 11321848 | 2 | 40 | G:0.975                 | A:0.025      |             |
| chr28                      | 11321885 | 2 | 40 | G:0.825                 | A:0.175      |             |
| chr28                      | 11321925 | 2 | 40 | A:0.025                 | G:0.975      |             |
| chr28                      | 11322298 | 2 | 40 | G:0.375                 | A:0.625      |             |
| chr28                      | 11322475 | 2 | 40 | T:0.9                   | A:0.1        |             |
| chr28                      | 11322736 | 2 | 38 | T:0.973684              | G:0.0263158  |             |
| chr28                      | 11323142 | 2 | 40 | G:0.85                  | A:0.15       |             |
| chr28                      | 11323350 | 2 | 40 | G:0.975                 | C:0.025      |             |
| chr28                      | 11323370 | 2 | 38 | TGAG:0.973684           | T:0.0263158  |             |
| chr28                      | 11324084 | 2 | 40 | A:0.85                  | T:0.15       |             |
| chr28                      | 11324431 | 3 | 40 | GT:0.9                  | G:0.025      | GTTTT:0.075 |
| chr28                      | 11324732 | 2 | 38 | T:0.973684              | C:0.0263158  |             |

|                                                |          |   |    |                         |             |             |
|------------------------------------------------|----------|---|----|-------------------------|-------------|-------------|
| chr28                                          | 11325054 | 2 | 40 | T:0.975                 | C:0.025     |             |
| chr28                                          | 11325291 | 2 | 38 | C:0.947368              |             | G:0.0526316 |
| chr28                                          | 11325305 | 2 | 36 | T:0.916667              |             | G:0.0833333 |
| chr28                                          | 11325854 | 2 | 40 | A:0.35                  | G:0.65      |             |
| chr28                                          | 11326114 | 3 | 40 | A:0.425                 |             |             |
| ACAGACATATCATTTTTTTTTTTTTTTAATTTTTTTTTTT:0.425 |          |   |    |                         |             |             |
| ACAGACATATCATTTTTTTTTTTTTTTAATTTTTTTTTTT:0.15  |          |   |    |                         |             |             |
| chr28                                          | 11326177 | 2 | 36 | A:0.972222              |             | T:0.0277778 |
| chr28                                          | 11326221 | 2 | 38 | T:0.973684              |             | G:0.0263158 |
| chr28                                          | 11326512 | 2 | 36 | A:0.972222              |             | T:0.0277778 |
| chr28                                          | 11326707 | 2 | 36 | C:0.916667              |             | T:0.0833333 |
| chr28                                          | 11326756 | 2 | 36 | A:0.972222              |             | C:0.0277778 |
| chr28                                          | 11326942 | 2 | 40 | A:1                     | G:0         |             |
| chr28                                          | 11327080 | 2 | 40 | G:0.975                 | A:0.025     |             |
| chr28                                          | 11327354 | 2 | 40 | C:0.025                 | G:0.975     |             |
| chr28                                          | 11327564 | 2 | 38 | T:1                     | G:0         |             |
| chr28                                          | 11327848 | 2 | 34 | T:0.941176              |             | C:0.0588235 |
| chr28                                          | 11327995 | 2 | 36 | T:0.361111              |             | A:0.638889  |
| chr28                                          | 11328012 | 2 | 40 | T:0.85                  | A:0.15      |             |
| chr28                                          | 11328494 | 2 | 28 | A:0.321429              |             | T:0.678571  |
| chr28                                          | 11328539 | 2 | 30 | C:0.3                   | T:0.7       |             |
| chr28                                          | 11329088 | 3 | 38 | AT:0.868421             |             | A:0.131579  |
| ATT:0                                          |          |   |    |                         |             |             |
| chr28                                          | 11329098 | 2 | 40 | T:0.925                 | TC:0.075    |             |
| chr28                                          | 11329128 | 2 | 40 | C:0.975                 | CACAG:0.025 |             |
| chr28                                          | 11329135 | 2 | 40 | A:1                     | AG:0        |             |
| chr28                                          | 11329136 | 3 | 40 | A:0.975                 | AG:0        | G:0.025     |
| chr28                                          | 11329530 | 2 | 36 | G:0.0833333             |             | C:0.916667  |
| chr28                                          | 11329742 | 2 | 36 | T:0.944444              |             | A:0.0555556 |
| chr28                                          | 11329922 | 2 | 28 | G:0.642857              |             | GT:0.357143 |
| chr28                                          | 11329945 | 2 | 14 | G:0.714286              |             | A:0.285714  |
| chr28                                          | 11329971 | 2 | 26 | GTGTATATATATATATATATA:1 | G:0         |             |
| chr28                                          | 11329973 | 2 | 36 | GTATATATATA:0.888889    |             | G:          |
| 0.111111                                       |          |   |    |                         |             |             |
| chr28                                          | 11330070 | 2 | 38 | T:1                     | C:0         |             |
| chr28                                          | 11330116 | 3 | 30 | GTT:0.166667            |             | G:0.233333  |
| GT:0.6                                         |          |   |    |                         |             |             |
| chr28                                          | 11330293 | 2 | 40 | G:0.375                 | A:0.625     |             |
| chr28                                          | 11331216 | 2 | 40 | A:0.85                  | G:0.15      |             |
| chr28                                          | 11331797 | 2 | 38 | T:0.342105              |             | G:0.657895  |
| chr28                                          | 11332333 | 2 | 36 | A:1                     | G:0         |             |
| chr28                                          | 11332587 | 2 | 40 | A:0.1                   | AAAAAC:0.9  |             |
| chr28                                          | 11332761 | 2 | 36 | G:1                     | A:0         |             |
| chr28                                          | 11333661 | 2 | 40 | G:0.1                   | GT:0.9      |             |
| chr28                                          | 11333686 | 2 | 40 | G:1                     | T:0         |             |
| chr28                                          | 11333928 | 2 | 40 | C:0.1                   | G:0.9       |             |
| chr28                                          | 11333938 | 2 | 40 | A:0.1                   | G:0.9       |             |
| chr28                                          | 11334020 | 2 | 40 | G:0.975                 | T:0.025     |             |
| chr28                                          | 11334067 | 2 | 36 | C:0.833333              |             | A:0.166667  |
| chr28                                          | 11334948 | 2 | 40 | C:1                     | T:0         |             |
| chr28                                          | 11335240 | 2 | 40 | G:0.975                 | C:0.025     |             |
| chr28                                          | 11335262 | 2 | 40 | A:0.825                 | T:0.175     |             |
| chr28                                          | 11335382 | 2 | 38 | A:1                     | G:0         |             |
| chr28                                          | 11336565 | 2 | 38 | CT:0.789474             |             | C:0.210526  |

|               |          |   |    |               |           |                 |
|---------------|----------|---|----|---------------|-----------|-----------------|
| chr28         | 11337174 | 2 | 40 | C:0.975       | T:0.025   |                 |
| chr28         | 11337189 | 2 | 40 | G:0.975       | A:0.025   |                 |
| chr28         | 11337192 | 2 | 40 | T:0.075       | C:0.925   |                 |
| chr28         | 11338940 | 2 | 38 | G:1           | C:0       |                 |
| chr28         | 11338972 | 2 | 40 | T:0.975       | C:0.025   |                 |
| chr28         | 11338995 | 2 | 40 | G:0.95        | GT:0.05   |                 |
| chr28         | 11339013 | 2 | 40 | T:1           | A:0       |                 |
| chr28         | 11339016 | 2 | 40 | G:0.9         | GATTT:0.1 |                 |
| chr28         | 11339345 | 2 | 38 | T:0.0526316   |           | C:0.947368      |
| chr28         | 11339675 | 2 | 38 | T:1           | C:0       |                 |
| chr28         | 11340018 | 2 | 38 | AT:0.868421   |           | A:0.131579      |
| chr28         | 11340028 | 2 | 40 | T:0.95        | A:0.05    |                 |
| chr28         | 11340268 | 2 | 40 | C:1           | T:0       |                 |
| chr28         | 11340368 | 2 | 40 | C:0.875       | CT:0.125  |                 |
| chr28         | 11340584 | 2 | 40 | A:1           | G:0       |                 |
| chr28         | 11340714 | 2 | 40 | C:1           | T:0       |                 |
| chr28         | 11340837 | 2 | 40 | G:0           | GT:1      |                 |
| chr28         | 11340842 | 2 | 40 | G:0           | GT:1      |                 |
| chr28         | 11341080 | 2 | 40 | A:1           | C:0       |                 |
| chr28         | 11342374 | 2 | 36 | A:0.5         | G:0.5     |                 |
| chr28         | 11342516 | 2 | 38 | T:0.947368    |           | C:0.0526316     |
| chr28         | 11342528 | 2 | 38 | C:0.0526316   |           | CCTCT:0.947368  |
| chr28         | 11342901 | 2 | 38 | A:0.0526316   |           | G:0.947368      |
| chr28         | 11342943 | 2 | 30 | CTTT:0.433333 |           | C:0.566667      |
| chr28         | 11343133 | 2 | 36 | G:0.972222    |           | T:0.0277778     |
| chr28         | 11343752 | 3 | 40 | TTTTG:0.2     |           | T:0.8           |
| TTTTGTTG:0    |          |   |    |               |           |                 |
| chr28         | 11343794 | 2 | 40 | G:0.95        | A:0.05    |                 |
| chr28         | 11345173 | 2 | 34 | C:0.911765    |           | CT:0.0882353    |
| chr28         | 11345441 | 2 | 40 | G:0.975       | A:0.025   |                 |
| chr28         | 11345575 | 2 | 36 | T:0.916667    |           | A:0.0833333     |
| chr28         | 11345772 | 2 | 40 | A:1           | G:0       |                 |
| chr28         | 11346071 | 3 | 36 | AT:0.888889   |           | A:0.0833333     |
| ATT:0.0277778 |          |   |    |               |           |                 |
| chr28         | 11346075 | 2 | 36 | T:1           | A:0       |                 |
| chr28         | 11346082 | 2 | 36 | T:1           | A:0       |                 |
| chr28         | 11346252 | 2 | 40 | G:0           | A:1       |                 |
| chr28         | 11346276 | 2 | 40 | G:0           | A:1       |                 |
| chr28         | 11346283 | 2 | 40 | T:0           | A:1       |                 |
| chr28         | 11346284 | 2 | 40 | G:0           | A:1       |                 |
| chr28         | 11346293 | 2 | 40 | T:0           | A:1       |                 |
| chr28         | 11346369 | 2 | 40 | CA:0          | C:1       |                 |
| chr28         | 11346741 | 2 | 40 | G:1           | A:0       |                 |
| chr28         | 11347334 | 2 | 38 | G:0.921053    |           | GT:0.0789474    |
| chr28         | 11347473 | 2 | 38 | G:1           | C:0       |                 |
| chr28         | 11347805 | 2 | 36 | G:0.972222    |           | T:0.0277778     |
| chr28         | 11348225 | 2 | 40 | GT:0.9        | G:0.1     |                 |
| chr28         | 11348241 | 2 | 40 | G:0.975       | A:0.025   |                 |
| chr28         | 11348405 | 2 | 38 | T:0.131579    |           | TTC:0.868421    |
| chr28         | 11348569 | 2 | 38 | CAG:1         | C:0       |                 |
| chr28         | 11349440 | 2 | 40 | A:0.975       | G:0.025   |                 |
| chr28         | 11349578 | 2 | 40 | G:0.975       | A:0.025   |                 |
| chr28         | 11350096 | 2 | 40 | T:1           | A:0       |                 |
| chr28         | 11350268 | 2 | 38 | T:0.973684    |           | TTGTG:0.0263158 |

|               |                          |    |                       |             |           |
|---------------|--------------------------|----|-----------------------|-------------|-----------|
| chr28         | 11350327 2               | 40 | G:1                   | GT:0        |           |
| chr28         | 11350916 2               | 40 | A:0.225               | G:0.775     |           |
| chr28         | 11351877 2               | 40 | G:1                   | C:0         |           |
| chr28         | 11352296 2               | 38 | C:0.973684            | T:0.0263158 |           |
| chr28         | 11352433 4               | 38 | CTT:0.736842          | C:0         | CTTT:     |
|               | 0.210526 CTTTT:0.0526316 |    |                       |             |           |
| chr28         | 11353222 2               | 36 | T:0.972222            | C:0.0277778 |           |
| chr28         | 11353570 2               | 38 | T:0.105263            | C:0.894737  |           |
| chr28         | 11353951 2               | 36 | A:1                   | AG:0        |           |
| chr28         | 11353954 3               | 34 | G:0.0588235           | GT:0.941176 |           |
| GTT:0         |                          |    |                       |             |           |
| chr28         | 11354007 3               | 32 | TGTGTGGGGGGGG:0.71875 | T:          |           |
| 0.09375       | TGG:0.1875               |    |                       |             |           |
| chr28         | 11354009 2               | 32 | TGTGGGGGGGG:0.5625    | T:0.4375    |           |
| chr28         | 11354011 2               | 34 | TGGGGGGGG:1           | T:0         |           |
| chr28         | 11354189 2               | 38 | T:1                   | C:0         |           |
| chr28         | 11355172 2               | 40 | C:1                   | A:0         |           |
| chr28         | 11355407 3               | 40 | CT:0.2                | C:0.775     | CTT:0.025 |
| chr28         | 11356045 2               | 40 | G:1                   | A:0         |           |
| chr28         | 11356881 3               | 36 | GAA:0.222222          | G:0.25      | GA:       |
| 0.527778      |                          |    |                       |             |           |
| chr28         | 11358289 3               | 38 | TA:0.236842           | T:0.684211  |           |
| TAA:0.0789474 |                          |    |                       |             |           |
| chr28         | 11358300 2               | 40 | A:0.95                | C:0.05      |           |
| chr28         | 11358751 2               | 38 | T:1                   | A:0         |           |
| chr28         | 11358783 2               | 38 | T:1                   | C:0         |           |
| chr28         | 11358785 2               | 38 | C:0.973684            | T:0.0263158 |           |
| chr28         | 11358995 2               | 38 | A:1                   | T:0         |           |
| chr28         | 11359571 2               | 40 | T:0.95                | A:0.05      |           |
| chr28         | 11359911 3               | 38 | CT:0.789474           | C:0.0526316 |           |
| CTT:0.157895  |                          |    |                       |             |           |
| chr28         | 11360031 2               | 38 | A:1                   | G:0         |           |
| chr28         | 11360684 2               | 38 | C:0                   | T:1         |           |
| chr28         | 11360703 2               | 38 | TTGAC:1               | T:0         |           |
| chr28         | 11360990 2               | 40 | G:0.975               | C:0.025     |           |
| chr28         | 11361323 2               | 40 | C:1                   | T:0         |           |
| chr28         | 11361862 2               | 40 | A:1                   | T:0         |           |
| chr28         | 11361867 2               | 40 | A:0.975               | G:0.025     |           |
| chr28         | 11362406 2               | 38 | A:1                   | G:0         |           |
| chr28         | 11362523 2               | 40 | A:1                   | G:0         |           |
| chr28         | 11362701 2               | 40 | T:1                   | C:0         |           |
| chr28         | 11362897 2               | 38 | A:0.236842            | G:0.763158  |           |
| chr28         | 11362904 2               | 38 | CAT:0.973684          | C:0.0263158 |           |
| chr28         | 11363289 2               | 40 | T:0.975               | C:0.025     |           |
| chr28         | 11363460 2               | 34 | CT:1                  | C:0         |           |
| chr28         | 11363642 2               | 38 | T:0.105263            | C:0.894737  |           |
| chr28         | 11363936 2               | 40 | A:1                   | C:0         |           |
| chr28         | 11363960 2               | 38 | G:1                   | A:0         |           |
| chr28         | 11364022 2               | 40 | T:0.975               | C:0.025     |           |
| chr28         | 11364054 2               | 40 | TAAA:0.975            | T:0.025     |           |
| chr28         | 11364938 2               | 38 | C:0.973684            | T:0.0263158 |           |
| chr28         | 11365347 2               | 40 | T:0.975               | C:0.025     |           |
| chr28         | 11366535 2               | 40 | A:1                   | T:0         |           |
| chr28         | 11367224 2               | 34 | A:0.970588            | G:0.0294118 |           |

|                                                           |          |   |    |              |                 |              |
|-----------------------------------------------------------|----------|---|----|--------------|-----------------|--------------|
| chr28                                                     | 11367266 | 2 | 40 | G:0.975      | A:0.025         |              |
| chr28                                                     | 11367613 | 2 | 36 | G:0.0277778  |                 | A:0.972222   |
| chr28                                                     | 11368188 | 2 | 36 | G:1          | C:0             |              |
| chr28                                                     | 11368883 | 2 | 38 | G:1          | A:0             |              |
| chr28                                                     | 11368930 | 2 | 38 | G:1          | A:0             |              |
| chr28                                                     | 11369634 | 2 | 38 | C:1          | T:0             |              |
| chr28                                                     | 11369698 | 2 | 38 | A:1          | G:0             |              |
| chr28                                                     | 11369707 | 2 | 40 | C:1          | T:0             |              |
| chr28                                                     | 11369865 | 2 | 40 | C:0.975      | A:0.025         |              |
| chr28                                                     | 11369931 | 2 | 38 | T:0.105263   |                 | TAC:0.894737 |
| chr28                                                     | 11370083 | 2 | 40 | G:0.225      | T:0.775         |              |
| chr28                                                     | 11370174 | 2 | 38 | C:0.157895   |                 | T:0.842105   |
| chr28                                                     | 11370406 | 2 | 34 | G:1          | C:0             |              |
| chr28                                                     | 11370827 | 2 | 40 | TTC:0.725    |                 | T:0.275      |
| chr28                                                     | 11370879 | 3 | 34 | CA:0.323529  |                 | C:0.0294118  |
| CAA:0.647059                                              |          |   |    |              |                 |              |
| chr28                                                     | 11371043 | 2 | 38 | T:1          | A:0             |              |
| chr28                                                     | 11372112 | 2 | 40 | T:1          | A:0             |              |
| chr28                                                     | 11372115 | 2 | 40 | A:1          | AT:0            |              |
| chr28                                                     | 11372357 | 2 | 38 | G:1          | A:0             |              |
| chr28                                                     | 11372999 | 2 | 40 | G:1          | A:0             |              |
| chr28                                                     | 11373109 | 2 | 38 | A:0.973684   |                 | G:0.0263158  |
| chr28                                                     | 11373317 | 2 | 36 | A:1          | AT:0            |              |
| chr28                                                     | 11373539 | 2 | 38 | G:0.973684   |                 | A:0.0263158  |
| chr28                                                     | 11373568 | 2 | 40 | G:0.975      | A:0.025         |              |
| chr28                                                     | 11374137 | 2 | 40 | C:1          | T:0             |              |
| chr28                                                     | 11374318 | 2 | 40 | G:1          | A:0             |              |
| chr28                                                     | 11375016 | 2 | 40 | T:0.05       | A:0.95          |              |
| chr28                                                     | 11375064 | 2 | 38 | T:0.973684   |                 | C:0.0263158  |
| chr28                                                     | 11375204 | 2 | 38 | C:0.921053   |                 | CT:0.0789474 |
| chr28                                                     | 11375257 | 2 | 38 | CAG:0.973684 |                 | C:0.0263158  |
| chr28                                                     | 11376138 | 2 | 40 | G:0.975      | A:0.025         |              |
| chr28                                                     | 11376448 | 2 | 38 | A:1          | T:0             |              |
| chr28                                                     | 11376449 | 2 | 38 | C:1          | T:0             |              |
| chr28                                                     | 11376645 | 2 | 36 | C:0.972222   |                 | T:0.0277778  |
| chr28                                                     | 11377176 | 2 | 34 | C:0.0588235  |                 | T:0.941176   |
| chr28                                                     | 11377785 | 2 | 40 | GA:1         | G:0             |              |
| chr28                                                     | 11377847 | 2 | 38 | T:0.131579   |                 | C:0.868421   |
| chr28                                                     | 11377911 | 2 | 40 | G:1          | A:0             |              |
| chr28                                                     | 11377940 | 2 | 40 | GAT:0.85     | G:0.15          |              |
| chr28                                                     | 11378893 | 2 | 34 | GT:0.294118  |                 | G:0.705882   |
| chr28                                                     | 11379024 | 2 | 38 | C:1          | T:0             |              |
| chr28                                                     | 11380042 | 3 | 40 | G:1          |                 |              |
| GCCAAATAGTCTTTTTATTTTTTTTTTTTTATTTTTTTATTTTTTTATTTTTTTT:0 |          |   |    |              |                 |              |
| GCCAAATAGTCTTTTTATTTTTTTTTTTTTATTTTTTTATTTTTTTT:0         |          |   |    |              |                 |              |
| chr28                                                     | 11380061 | 2 | 40 | C:1          | T:0             |              |
| chr28                                                     | 11380180 | 2 | 40 | C:1          | CT:0            |              |
| chr28                                                     | 11380262 | 2 | 38 | A:0.473684   |                 | G:0.526316   |
| chr28                                                     | 11380346 | 2 | 36 | TAA:1        | T:0             |              |
| chr28                                                     | 11380606 | 2 | 40 | G:0.9        | GTTTAGTAACA:0.1 |              |
| chr28                                                     | 11380786 | 2 | 40 | TG:0.975     | T:0.025         |              |
| chr28                                                     | 11381145 | 3 | 36 | A:0.111111   |                 | ATT:0.138889 |
| ATTAT:0.75                                                |          |   |    |              |                 |              |
| chr28                                                     | 11381146 | 2 | 36 | A:0.972222   |                 | T:0.0277778  |

|       |                |    |                              |                 |
|-------|----------------|----|------------------------------|-----------------|
| chr28 | 11381457 3     | 40 | CTTAT:0.975                  | C:0.025         |
|       | CTTATTTAT:0    |    |                              |                 |
| chr28 | 11381771 2     | 40 | C:0.075 T:0.925              |                 |
| chr28 | 11381789 2     | 40 | G:0.975 A:0.025              |                 |
| chr28 | 11381828 2     | 40 | C:0.975 A:0.025              |                 |
| chr28 | 11382448 2     | 40 | G:1 A:0                      |                 |
| chr28 | 11382674 2     | 40 | C:0.125 T:0.875              |                 |
| chr28 | 11382703 2     | 40 | G:1 A:0                      |                 |
| chr28 | 11382784 2     | 34 | C:0.970588                   | CT:0.0294118    |
| chr28 | 11382796 2     | 36 | C:0.861111                   | CT:0.138889     |
| chr28 | 11382890 2     | 38 | A:0.973684                   | G:0.0263158     |
| chr28 | 11382915 2     | 38 | CG:0.263158                  | C:0.736842      |
| chr28 | 11382929 2     | 38 | C:0.447368                   | T:0.552632      |
| chr28 | 11383210 2     | 40 | C:1 T:0                      |                 |
| chr28 | 11384031 2     | 34 | C:1 A:0                      |                 |
| chr28 | 11384336 2     | 38 | T:1 C:0                      |                 |
| chr28 | 11384435 3     | 38 | GTTTTTTTTTTTTT:0.736842      | G:              |
|       | 0.263158 GTT:0 |    |                              |                 |
| chr28 | 11384574 2     | 38 | G:1 A:0                      |                 |
| chr28 | 11384657 2     | 40 | C:1 A:0                      |                 |
| chr28 | 11385087 2     | 40 | C:0.05 T:0.95                |                 |
| chr28 | 11385266 2     | 40 | C:0.975 T:0.025              |                 |
| chr28 | 11385325 2     | 40 | G:1 A:0                      |                 |
| chr28 | 11385610 2     | 40 | C:0.125 T:0.875              |                 |
| chr28 | 11385832 2     | 34 | CA:0.117647                  | C:0.882353      |
| chr28 | 11385878 2     | 38 | G:0.973684                   | A:0.0263158     |
| chr28 | 11386115 2     | 34 | C:0.970588                   | T:0.0294118     |
| chr28 | 11386490 2     | 38 | T:0.210526                   | A:0.789474      |
| chr28 | 11386521 2     | 40 | T:0.975 G:0.025              |                 |
| chr28 | 11386861 3     | 36 | TAA:0.25 T:0.25              | TA:0.5          |
| chr28 | 11387684 2     | 40 | T:1 G:0                      |                 |
| chr28 | 11387819 2     | 40 | ATGATTTTAAT:1                | A:0             |
| chr28 | 11388558 2     | 38 | TA:0.789474                  | T:0.210526      |
| chr28 | 11388762 2     | 40 | G:0.15 A:0.85                |                 |
| chr28 | 11388982 2     | 40 | A:0.925 G:0.075              |                 |
| chr28 | 11389436 2     | 36 | C:0.972222                   | CT:0.0277778    |
| chr28 | 11389806 2     | 40 | C:0.95 T:0.05                |                 |
| chr28 | 11390211 2     | 38 | G:0.947368                   | A:0.0526316     |
| chr28 | 11390298 2     | 36 | G:0.0833333                  | A:0.916667      |
| chr28 | 11390661 2     | 38 | CTT:0.131579                 | C:0.868421      |
| chr28 | 11390684 2     | 38 | C:0.973684                   | A:0.0263158     |
| chr28 | 11391337 2     | 38 | G:1 A:0                      |                 |
| chr28 | 11392149 2     | 40 | G:0.975 A:0.025              |                 |
| chr28 | 11392155 2     | 40 | C:0.975 T:0.025              |                 |
| chr28 | 11392243 2     | 40 | GTGAAAT:0.975                | G:0.025         |
| chr28 | 11392462 2     | 40 | GAC:1 G:0                    |                 |
| chr28 | 11393180 2     | 38 | G:0.289474                   | GT:0.710526     |
| chr28 | 11393771 2     | 40 | G:0.8 GAGAGAGAGAGAGAGAGAGAA: |                 |
|       | 0.2            |    |                              |                 |
| chr28 | 11393782 2     | 38 | A:0.657895                   | AG:0.342105     |
| chr28 | 11393783 3     | 40 | A:0.625 AG:0.35              | AGAGAGAGAAAGAG: |
|       | 0.025          |    |                              |                 |
| chr28 | 11393791 2     | 38 | A:0.973684                   | AAGAG:0.0263158 |
| chr28 | 11393795 2     | 38 | GAGAA:0.657895               | G:0.342105      |

|                       |          |   |    |                   |           |              |
|-----------------------|----------|---|----|-------------------|-----------|--------------|
| chr28                 | 11393845 | 2 | 40 | G:0.9             | GAA:0.1   |              |
| chr28                 | 11393846 | 2 | 40 | AG:0.175          | A:0.825   |              |
| chr28                 | 11393849 | 2 | 40 | A:1               | AAG:0     |              |
| chr28                 | 11393850 | 3 | 40 | A:0.15            | G:0.825   | AG:0.025     |
| chr28                 | 11393870 | 2 | 40 | GA:0.975          | G:0.025   |              |
| chr28                 | 11393942 | 2 | 38 | T:0.631579        |           | TTA:0.368421 |
| chr28                 | 11393957 | 2 | 40 | TA:1              | T:0       |              |
| chr28                 | 11393959 | 2 | 40 | T:0.85            | TATA:0.15 |              |
| chr28                 | 11394662 | 2 | 40 | G:1               | A:0       |              |
| chr28                 | 11395143 | 2 | 38 | A:0.973684        |           | T:0.0263158  |
| chr28                 | 11395453 | 2 | 40 | C:0.975           | T:0.025   |              |
| chr28                 | 11395604 | 3 | 38 | CTT:0.868421      |           | C:0.105263   |
| TTT:0.0263158         |          |   |    |                   |           |              |
| chr28                 | 11395984 | 2 | 34 | C:0.970588        |           | T:0.0294118  |
| chr28                 | 11396231 | 2 | 38 | G:0.0526316       |           | T:0.947368   |
| chr28                 | 11396469 | 2 | 38 | C:0.210526        |           | T:0.789474   |
| chr28                 | 11396726 | 2 | 38 | T:0.973684        |           | C:0.0263158  |
| chr28                 | 11396729 | 2 | 38 | A:0.973684        |           | G:0.0263158  |
| chr28                 | 11396817 | 2 | 40 | C:0.975           | T:0.025   |              |
| chr28                 | 11396858 | 2 | 40 | C:0.975           | A:0.025   |              |
| chr28                 | 11397076 | 2 | 40 | G:1               | A:0       |              |
| chr28                 | 11397620 | 2 | 36 | GTT:0.0833333     |           | G:0.916667   |
| chr28                 | 11397684 | 2 | 40 | AAGAG:0.25        |           | A:0.75       |
| chr28                 | 11397748 | 2 | 36 | A:0.0555556       |           | G:0.944444   |
| chr28                 | 11397771 | 2 | 36 | C:0.916667        |           | T:0.0833333  |
| chr28                 | 11398479 | 2 | 40 | T:0.2             | C:0.8     |              |
| chr28                 | 11398842 | 2 | 34 | G:1               | A:0       |              |
| chr28                 | 11399261 | 2 | 38 | T:0.973684        |           | C:0.0263158  |
| chr28                 | 11399472 | 2 | 36 | C:0.972222        |           | T:0.0277778  |
| chr28                 | 11400792 | 2 | 40 | A:0.075           | T:0.925   |              |
| chr28                 | 11401721 | 2 | 40 | G:0.175           | A:0.825   |              |
| chr28                 | 11401844 | 2 | 40 | G:1               | A:0       |              |
| chr28                 | 11401962 | 2 | 38 | G:1               | A:0       |              |
| chr28                 | 11402177 | 2 | 38 | C:0.710526        |           | A:0.289474   |
| chr28                 | 11402263 | 2 | 38 | C:0.973684        |           | T:0.0263158  |
| chr28                 | 11402468 | 2 | 38 | G:0.973684        |           | T:0.0263158  |
| chr28                 | 11402469 | 2 | 38 | A:0.973684        |           | T:0.0263158  |
| chr28                 | 11402596 | 2 | 36 | T:1               | C:0       |              |
| chr28                 | 11402600 | 3 | 40 | CCTCTCTCTCT:0.275 |           | C:0.15       |
| CCTCTCTCTCTCTCT:0.575 |          |   |    |                   |           |              |
| chr28                 | 11402645 | 2 | 22 | TA:0.5            | T:0.5     |              |
| chr28                 | 11402796 | 2 | 40 | C:1               | T:0       |              |
| chr28                 | 11403468 | 2 | 40 | C:0.975           | T:0.025   |              |
| chr28                 | 11403533 | 2 | 38 | A:0.973684        |           | G:0.0263158  |
| chr28                 | 11403536 | 2 | 38 | T:1               | C:0       |              |
| chr28                 | 11404631 | 2 | 36 | T:0.194444        |           | C:0.805556   |
| chr28                 | 11404670 | 2 | 40 | A:1               | C:0       |              |
| chr28                 | 11404882 | 2 | 40 | G:0.075           | C:0.925   |              |
| chr28                 | 11406064 | 2 | 38 | C:1               | T:0       |              |
| chr28                 | 11406676 | 2 | 36 | T:0.916667        |           | C:0.0833333  |
| chr28                 | 11406697 | 2 | 38 | T:0.263158        |           | A:0.736842   |
| chr28                 | 11406738 | 2 | 38 | AT:0.157895       |           | A:0.842105   |
| chr28                 | 11406755 | 2 | 38 | G:0.289474        |           | A:0.710526   |
| chr28                 | 11406933 | 2 | 36 | G:0.944444        |           | A:0.0555556  |

|       |          |   |    |                 |                |
|-------|----------|---|----|-----------------|----------------|
| chr28 | 11406993 | 2 | 36 | T:0.111111      | C:0.888889     |
| chr28 | 11407521 | 2 | 36 | G:0.0833333     | GT:0.916667    |
| chr28 | 11407834 | 2 | 40 | G:0.95 A:0.05   |                |
| chr28 | 11409745 | 2 | 38 | T:0.0526316     | C:0.947368     |
| chr28 | 11410506 | 2 | 40 | T:1 C:0         |                |
| chr28 | 11410817 | 2 | 40 | G:1 C:0         |                |
| chr28 | 11410823 | 2 | 38 | AT:0.157895     | A:0.842105     |
| chr28 | 11411325 | 2 | 34 | G:0.764706      | A:0.235294     |
| chr28 | 11411580 | 2 | 40 | C:0.35 A:0.65   |                |
| chr28 | 11411684 | 2 | 38 | G:0.105263      | A:0.894737     |
| chr28 | 11411741 | 2 | 36 | T:0 C:1         |                |
| chr28 | 11411795 | 2 | 34 | A:0.970588      | G:0.0294118    |
| chr28 | 11411861 | 2 | 36 | T:0.222222      | C:0.777778     |
| chr28 | 11411938 | 2 | 38 | C:0.868421      | T:0.131579     |
| chr28 | 11411995 | 2 | 38 | CCCA:0.105263   | C:0.894737     |
| chr28 | 11412144 | 2 | 38 | A:0.184211      | C:0.815789     |
| chr28 | 11412181 | 2 | 40 | T:0.175 G:0.825 |                |
| chr28 | 11412203 | 2 | 40 | C:0.175 T:0.825 |                |
| chr28 | 11412265 | 2 | 40 | T:0.975 C:0.025 |                |
| chr28 | 11412370 | 2 | 36 | C:0.444444      | T:0.555556     |
| chr28 | 11412429 | 2 | 38 | G:0.973684      | A:0.0263158    |
| chr28 | 11412463 | 2 | 38 | A:0.0526316     | G:0.947368     |
| chr28 | 11412904 | 2 | 38 | C:0.394737      | T:0.605263     |
| chr28 | 11412963 | 2 | 38 | A:0.131579      | C:0.868421     |
| chr28 | 11413178 | 2 | 38 | A:0.157895      | G:0.842105     |
| chr28 | 11413588 | 2 | 38 | T:0.105263      | C:0.894737     |
| chr28 | 11413779 | 2 | 36 | G:0.0833333     | C:0.916667     |
| chr28 | 11415240 | 2 | 36 | C:0.777778      | T:0.222222     |
| chr28 | 11415441 | 2 | 38 | G:1 GC:0        |                |
| chr28 | 11415479 | 2 | 38 | G:0.973684      | A:0.0263158    |
| chr28 | 11415635 | 2 | 38 | C:1 A:0         |                |
| chr28 | 11415710 | 2 | 38 | C:0.0789474     | T:0.921053     |
| chr28 | 11416137 | 2 | 38 | T:0.157895      | G:0.842105     |
| chr28 | 11416184 | 2 | 40 | C:0.875 T:0.125 |                |
| chr28 | 11416385 | 2 | 40 | C:0.1 T:0.9     |                |
| chr28 | 11416393 | 2 | 40 | A:0.1 G:0.9     |                |
| chr28 | 11416421 | 2 | 38 | C:0.0789474     | T:0.921053     |
| chr28 | 11416931 | 2 | 40 | G:0.8 A:0.2     |                |
| chr28 | 11417125 | 2 | 38 | C:0.0526316     | A:0.947368     |
| chr28 | 11417144 | 2 | 40 | C:0.05 G:0.95   |                |
| chr28 | 11417358 | 2 | 34 | G:0.0588235     | A:0.941176     |
| chr28 | 11417380 | 2 | 38 | T:0.0526316     | C:0.947368     |
| chr28 | 11417401 | 2 | 38 | G:0.0263158     | T:0.973684     |
| chr28 | 11417573 | 2 | 36 | C:1 T:0         |                |
| chr28 | 11417577 | 2 | 38 | A:0.0526316     | G:0.947368     |
| chr28 | 11417769 | 2 | 40 | C:1 T:0         |                |
| chr28 | 11418418 | 2 | 38 | C:0.947368      | CTTA:0.0526316 |
| chr28 | 11418658 | 2 | 40 | G:0.975 A:0.025 |                |
| chr28 | 11418862 | 2 | 32 | C:0.09375       | T:0.90625      |
| chr28 | 11419163 | 2 | 32 | G:0 A:1         |                |
| chr28 | 11419363 | 2 | 28 | A:0.607143      | T:0.392857     |
| chr28 | 11420115 | 2 | 30 | C:0.166667      | G:0.833333     |
| chr28 | 11420140 | 2 | 34 | G:0.941176      | A:0.0588235    |
| chr28 | 11420191 | 2 | 28 | A:0.25 T:0.75   |                |



|       |                   |    |                   |         |                 |
|-------|-------------------|----|-------------------|---------|-----------------|
| chr28 | 11420278 2        | 28 | G:0.75            | A:0.25  |                 |
| chr28 | 11420342 2        | 30 | G:1               | GC:0    |                 |
| chr28 | 11420347 2        | 30 | G:0.1             | GC:0.9  |                 |
| chr28 | 11420354 2        | 30 | C:0.1             | T:0.9   |                 |
| chr28 | 11420399 2        | 30 | AC:0.133333       |         | A:0.866667      |
| chr28 | 11420410 2        | 30 | C:0.133333        |         | T:0.866667      |
| chr28 | 11420543 2        | 24 | C:0.166667        |         | G:0.833333      |
| chr28 | 11420689 2        | 24 | T:0.708333        |         | A:0.291667      |
| chr28 | 11421086 2        | 30 | C:0.766667        |         | T:0.233333      |
| chr28 | 11421306 2        | 36 | C:0.111111        |         | G:0.888889      |
| chr28 | 11421383 2        | 36 | C:0.166667        |         | T:0.833333      |
| chr28 | 11421567 2        | 40 | T:0.3             | C:0.7   |                 |
| chr28 | 11421735 2        | 36 | C:0.0833333       |         | A:0.916667      |
| chr28 | 11421942 2        | 38 | T:0.0526316       |         | C:0.947368      |
| chr28 | 11422206 2        | 38 | G:0.0526316       |         | A:0.947368      |
| chr28 | 11422385 2        | 40 | CT:0.85           | C:0.15  |                 |
| chr28 | 11422386 2        | 40 | T:0.225           | C:0.775 |                 |
| chr28 | 11422387 2        | 40 | G:0.85            | C:0.15  |                 |
| chr28 | 11422461 2        | 38 | G:0.473684        |         | A:0.526316      |
| chr28 | 11422483 2        | 38 | G:0.578947        |         | A:0.421053      |
| chr28 | 11422662 2        | 38 | G:1               | C:0     |                 |
| chr28 | 11422677 2        | 40 | C:0.675           | T:0.325 |                 |
| chr28 | 11422834 2        | 40 | C:0.825           | G:0.175 |                 |
| chr28 | 11423120 2        | 38 | G:0.105263        |         | A:0.894737      |
| chr28 | 11423200 2        | 40 | G:0.475           | A:0.525 |                 |
| chr28 | 11423349 2        | 38 | G:0.5             | A:0.5   |                 |
| chr28 | 11423590 2        | 38 | G:0.236842        |         | A:0.763158      |
| chr28 | 11424170 2        | 38 | C:0.0526316       |         | CT:0.947368     |
| chr28 | 11424205 2        | 36 | C:0.833333        |         | T:0.166667      |
| chr28 | 11424287 2        | 36 | T:0.861111        |         | TG:0.138889     |
| chr28 | 11424305 2        | 36 | C:0.388889        |         | T:0.611111      |
| chr28 | 11424429 3        | 36 | ATTTTTTT:0.694444 |         | A:              |
|       | 0.305556 ATTTTT:0 |    |                   |         |                 |
| chr28 | 11424609 2        | 38 | C:0.842105        |         | G:0.157895      |
| chr28 | 11424683 2        | 34 | T:0.823529        |         | TTGAAC:0.176471 |
| chr28 | 11424708 2        | 32 | C:0.96875         |         | T:0.03125       |
| chr28 | 11424721 2        | 34 | T:0.411765        |         | C:0.588235      |
| chr28 | 11424818 2        | 32 | C:1               | T:0     |                 |
| chr28 | 11424884 2        | 28 | C:1               | T:0     |                 |
| chr28 | 11425255 2        | 40 | C:0.775           | T:0.225 |                 |
| chr28 | 11425269 2        | 40 | T:0.3             | C:0.7   |                 |
| chr28 | 11425339 2        | 38 | G:0.789474        |         | C:0.210526      |
| chr28 | 11425346 2        | 40 | G:0.8             | A:0.2   |                 |
| chr28 | 11425922 2        | 38 | G:0.842105        |         | T:0.157895      |
| chr28 | 11425958 2        | 40 | A:0.85            | C:0.15  |                 |
| chr28 | 11426016 2        | 36 | A:0.805556        |         | AT:0.194444     |
| chr28 | 11426159 2        | 40 | A:0.8             | G:0.2   |                 |
| chr28 | 11426266 2        | 34 | G:0.617647        |         | A:0.382353      |
| chr28 | 11426282 2        | 38 | T:0.842105        |         | C:0.157895      |
| chr28 | 11426438 2        | 34 | T:0.794118        |         | A:0.205882      |
| chr28 | 11426621 2        | 40 | A:0.5             | G:0.5   |                 |
| chr28 | 11426737 2        | 40 | A:0.8             | C:0.2   |                 |
| chr28 | 11426791 2        | 40 | T:0.85            | C:0.15  |                 |
| chr28 | 11427406 2        | 38 | A:0.736842        |         | C:0.263158      |

|       |             |   |                 |                   |                |
|-------|-------------|---|-----------------|-------------------|----------------|
| chr28 | 11427446    | 2 | 38              | G:0.736842        | A:0.263158     |
| chr28 | 11427512    | 2 | 38              | T:1 G:0           |                |
| chr28 | 11427715    | 2 | 38              | C:1 T:0           |                |
| chr28 | 11427820    | 2 | 40              | G:0.85 T:0.15     |                |
| chr28 | 11427838    | 2 | 40              | T:0.825 C:0.175   |                |
| chr28 | 11427908    | 2 | 34              | C:1 A:0           |                |
| chr28 | 11428001    | 2 | 38              | G:0.842105        | C:0.157895     |
| chr28 | 11428014    | 2 | 38              | C:0.842105        | T:0.157895     |
| chr28 | 11428071    | 2 | 36              | T:0.75 C:0.25     |                |
| chr28 | 11428105    | 2 | 36              | T:0.833333        | G:0.166667     |
| chr28 | 11428263    | 2 | 38              | A:0.789474        | G:0.210526     |
| chr28 | 11428386    | 2 | 38              | A:1 G:0           |                |
| chr28 | 11428887    | 2 | 38              | T:0.842105        | C:0.157895     |
| chr28 | 11428889    | 2 | 38              | A:0.763158        | G:0.236842     |
| chr28 | 11428965    | 2 | 40              | A:0.625 C:0.375   |                |
| chr28 | 11429020    | 2 | 40              | A:1 G:0           |                |
| chr28 | 11429207    | 2 | 38              | GTT:0.815789      | G:0.184211     |
| chr28 | 11429220    | 2 | 38              | C:0.789474        | T:0.210526     |
| chr28 | 11429733    | 2 | 36              | A:0.416667        | T:0.583333     |
| chr28 | 11429844    | 2 | 36              | G:0.722222        | A:0.277778     |
| chr28 | 11429874    | 2 | 38              | A:0.605263        | G:0.394737     |
| chr28 | 11429887    | 2 | 38              | C:0.815789        | CTT:0.184211   |
| chr28 | 11430082    | 2 | 36              | A:0.555556        | T:0.444444     |
| chr28 | 11430108    | 2 | 36              | C:0.527778        | T:0.472222     |
| chr28 | 11430770    | 2 | 38              | A:0.684211        | C:0.315789     |
| chr28 | 11431115    | 2 | 40              | T:0.775 C:0.225   |                |
| chr28 | 11431529    | 2 | 40              | G:0.85 C:0.15     |                |
| chr28 | 11431632    | 2 | 40              | A:0.875 G:0.125   |                |
| chr28 | 11431899    | 2 | 40              | G:0.8 A:0.2       |                |
| chr28 | 11432698    | 2 | 36              | T:0.805556        | A:0.194444     |
| chr28 | 11432793    | 2 | 36              | C:0.361111        | T:0.638889     |
| chr28 | 11432958    | 2 | 40              | TA:1 T:0          |                |
| chr28 | 11433004    | 2 | 38              | C:1 T:0           |                |
| chr28 | 11433034    | 2 | 40              | C:1 G:0           |                |
| chr28 | 11433414    | 2 | 40              | T:0.8 TAAACAA:0.2 |                |
| chr28 | 11434096    | 2 | 38              | CTTTT:0.526316    | C:0.473684     |
| chr28 | 11434131    | 2 | 36              | T:0.638889        | C:0.361111     |
| chr28 | 11434149    | 2 | 36              | G:0.638889        | A:0.361111     |
| chr28 | 11434291    | 2 | 34              | A:0.588235        | C:0.411765     |
| chr28 | 11434368    | 2 | 38              | G:0.578947        | A:0.421053     |
| chr28 | 11434415    | 2 | 40              | G:0.8 A:0.2       |                |
| chr28 | 11434527    | 2 | 34              | A:0.617647        | G:0.382353     |
| chr28 | 11434650    | 2 | 34              | T:0.529412        | TGTG:0.470588  |
| chr28 | 11435664    | 2 | 34              | G:1 A:0           |                |
| chr28 | 11435675    | 2 | 36              | G:1 T:0           |                |
| chr28 | 11435691    | 2 | 36              | C:0.972222        | T:0.0277778    |
| chr28 | 11435692    | 2 | 36              | G:0.972222        | T:0.0277778    |
| chr28 | 11435780    | 2 | 40              | G:0.825 C:0.175   |                |
| chr28 | 11436332    | 2 | 36              | G:0.555556        | A:0.444444     |
| chr28 | 11436376    | 2 | 38              | A:0.0789474       | G:0.921053     |
| chr28 | 11436526    | 5 | 40              | GGA:0.325         | G:0.275 GGAGA: |
| 0.175 | GGAGAGA:0.1 |   | GGAGAGAGA:0.125 |                   |                |
| chr28 | 11436632    | 2 | 36              | C:1 T:0           |                |
| chr28 | 11436634    | 2 | 36              | G:0.694444        | A:0.305556     |

|       |          |   |    |                  |             |
|-------|----------|---|----|------------------|-------------|
| chr28 | 11436761 | 2 | 38 | C:0.710526       | T:0.289474  |
| chr28 | 11436807 | 2 | 36 | T:0.583333       | C:0.416667  |
| chr28 | 11436968 | 2 | 38 | G:0.842105       | A:0.157895  |
| chr28 | 11437489 | 2 | 38 | A:1 C:0          |             |
| chr28 | 11437610 | 2 | 38 | T:0.0526316      | C:0.947368  |
| chr28 | 11437708 | 2 | 38 | C:0.421053       | A:0.578947  |
| chr28 | 11438036 | 2 | 36 | C:0.805556       | T:0.194444  |
| chr28 | 11438150 | 2 | 40 | CT:0.125 C:0.875 |             |
| chr28 | 11438221 | 2 | 40 | T:0.775 C:0.225  |             |
| chr28 | 11438900 | 2 | 38 | G:0.342105       | A:0.657895  |
| chr28 | 11439207 | 2 | 40 | C:0.475 T:0.525  |             |
| chr28 | 11439218 | 2 | 40 | T:0.475 C:0.525  |             |
| chr28 | 11439221 | 2 | 40 | G:1 T:0          |             |
| chr28 | 11439498 | 2 | 38 | C:0.263158       | T:0.736842  |
| chr28 | 11439553 | 2 | 38 | C:0.842105       | T:0.157895  |
| chr28 | 11439861 | 2 | 40 | A:0.6 C:0.4      |             |
| chr28 | 11439912 | 2 | 34 | G:0.529412       | A:0.470588  |
| chr28 | 11440127 | 2 | 36 | C:1 T:0          |             |
| chr28 | 11440362 | 2 | 36 | C:1 T:0          |             |
| chr28 | 11440596 | 2 | 30 | A:0.8 T:0.2      |             |
| chr28 | 11440624 | 2 | 36 | TG:0.111111      | T:0.888889  |
| chr28 | 11440955 | 2 | 38 | C:0.526316       | A:0.473684  |
| chr28 | 11440979 | 2 | 38 | C:0.5 T:0.5      |             |
| chr28 | 11441034 | 2 | 34 | C:0.764706       | A:0.235294  |
| chr28 | 11441221 | 2 | 36 | C:0.861111       | T:0.138889  |
| chr28 | 11441237 | 2 | 32 | T:0.34375        | C:0.65625   |
| chr28 | 11441467 | 2 | 38 | C:0.868421       | T:0.131579  |
| chr28 | 11441654 | 2 | 36 | C:0.25 T:0.75    |             |
| chr28 | 11441685 | 2 | 36 | T:0.527778       | G:0.472222  |
| chr28 | 11441756 | 2 | 32 | A:0.21875        | G:0.78125   |
| chr28 | 11441841 | 2 | 36 | T:0.277778       | C:0.722222  |
| chr28 | 11441881 | 2 | 34 | G:0.235294       | A:0.764706  |
| chr28 | 11441889 | 2 | 34 | T:0.235294       | C:0.764706  |
| chr28 | 11442035 | 2 | 40 | A:0.275 C:0.725  |             |
| chr28 | 11442388 | 2 | 40 | G:0.275 C:0.725  |             |
| chr28 | 11442453 | 2 | 40 | T:0.975 A:0.025  |             |
| chr28 | 11443094 | 2 | 40 | A:0.05 G:0.95    |             |
| chr28 | 11443106 | 2 | 40 | G:0.425 A:0.575  |             |
| chr28 | 11443191 | 2 | 38 | G:0.105263       | A:0.894737  |
| chr28 | 11443231 | 2 | 40 | A:0.1 T:0.9      |             |
| chr28 | 11443345 | 2 | 40 | T:0.425 C:0.575  |             |
| chr28 | 11443407 | 2 | 38 | C:0.421053       | A:0.578947  |
| chr28 | 11443603 | 2 | 30 | CTATCT:0.933333  | C:0.0666667 |
| chr28 | 11443605 | 2 | 40 | ATCTAATCT:0.9    | A:0.1       |
| chr28 | 11443607 | 2 | 40 | CT:0.7 C:0.3     |             |
| chr28 | 11443608 | 2 | 40 | TA:0.825 T:0.175 |             |
| chr28 | 11443609 | 2 | 40 | AATCT:0.95       | A:0.05      |
| chr28 | 11443610 | 2 | 32 | ATCT:0.5 A:0.5   |             |
| chr28 | 11443612 | 2 | 40 | C:0.825 CA:0.175 |             |
| chr28 | 11443613 | 2 | 40 | T:0.825 A:0.175  |             |
| chr28 | 11443968 | 2 | 40 | T:0.45 C:0.55    |             |
| chr28 | 11444045 | 2 | 40 | G:0.55 C:0.45    |             |
| chr28 | 11444217 | 2 | 38 | G:0.526316       | A:0.473684  |
| chr28 | 11444259 | 2 | 34 | C:0.735294       | T:0.264706  |

|       |          |   |    |                        |                 |
|-------|----------|---|----|------------------------|-----------------|
| chr28 | 11444508 | 3 | 4  | TAA:0.25 T:0.75        | TA:0            |
| chr28 | 11444585 | 2 | 38 | C:0.578947             | G:0.421053      |
| chr28 | 11444718 | 2 | 38 | A:0.868421             | G:0.131579      |
| chr28 | 11445107 | 2 | 38 | A:0.473684             | AG:0.526316     |
| chr28 | 11445115 | 2 | 36 | G:0.5 C:0.5            |                 |
| chr28 | 11446124 | 2 | 40 | C:0.875 G:0.125        |                 |
| chr28 | 11446159 | 2 | 38 | C:0.473684             | T:0.526316      |
| chr28 | 11446167 | 2 | 38 | G:0.473684             | A:0.526316      |
| chr28 | 11446192 | 2 | 36 | C:0.694444             | T:0.305556      |
| chr28 | 11446200 | 2 | 36 | G:0.444444             | C:0.555556      |
| chr28 | 11446255 | 2 | 38 | G:1 A:0                |                 |
| chr28 | 11446275 | 2 | 38 | T:0.473684             | G:0.526316      |
| chr28 | 11446490 | 2 | 32 | T:0.1875 C:0.8125      |                 |
| chr28 | 11446497 | 2 | 32 | G:0.5625 A:0.4375      |                 |
| chr28 | 11446963 | 2 | 38 | G:1 A:0                |                 |
| chr28 | 11447015 | 2 | 36 | A:0.111111             | G:0.888889      |
| chr28 | 11447231 | 2 | 38 | G:0.842105             | A:0.157895      |
| chr28 | 11447532 | 2 | 38 | G:0.394737             | A:0.605263      |
| chr28 | 11447712 | 2 | 38 | T:0.631579             | TATCTC:0.368421 |
| chr28 | 11448227 | 2 | 40 | AGCTGGTCCAT:0.75       | A:0.25          |
| chr28 | 11448339 | 2 | 38 | T:0.710526             | G:0.289474      |
| chr28 | 11448341 | 2 | 38 | T:0.868421             | C:0.131579      |
| chr28 | 11448848 | 2 | 40 | CAACAGGG:0.65          | C:0.35          |
| chr28 | 11449428 | 2 | 36 | C:0.916667             | T:0.0833333     |
| chr28 | 11449436 | 2 | 34 | AC:0.735294            | A:0.264706      |
| chr28 | 11449587 | 2 | 40 | G:0.9 A:0.1            |                 |
| chr28 | 11449611 | 2 | 40 | A:0.85 G:0.15          |                 |
| chr28 | 11449847 | 2 | 40 | C:0.675 T:0.325        |                 |
| chr28 | 11449862 | 2 | 38 | A:0.684211             | G:0.315789      |
| chr28 | 11449948 | 2 | 38 | A:0.894737             | G:0.105263      |
| chr28 | 11450011 | 2 | 40 | C:0.925 A:0.075        |                 |
| chr28 | 11450081 | 2 | 40 | T:0.475 G:0.525        |                 |
| chr28 | 11450420 | 2 | 40 | C:0.825 T:0.175        |                 |
| chr28 | 11450463 | 2 | 40 | C:0.825 T:0.175        |                 |
| chr28 | 11450545 | 2 | 40 | A:0.925 T:0.075        |                 |
| chr28 | 11450739 | 2 | 40 | G:0.85 A:0.15          |                 |
| chr28 | 11450777 | 2 | 38 | T:0.289474             | C:0.710526      |
| chr28 | 11450789 | 2 | 38 | A:0.289474             | C:0.710526      |
| chr28 | 11450968 | 2 | 40 | G:0.25 A:0.75          |                 |
| chr28 | 11451049 | 2 | 40 | A:0.725 AGG:0.275      |                 |
| chr28 | 11451066 | 2 | 40 | A:0.2 G:0.8            |                 |
| chr28 | 11451117 | 2 | 40 | G:0.5 C:0.5            |                 |
| chr28 | 11451126 | 2 | 40 | C:0.75 CGACTGGTGG:0.25 |                 |
| chr28 | 11451168 | 2 | 40 | A:0.725 C:0.275        |                 |
| chr28 | 11451413 | 2 | 34 | A:0.823529             | G:0.176471      |
| chr28 | 11452138 | 2 | 36 | T:0.805556             | C:0.194444      |
| chr28 | 11452230 | 2 | 30 | G:0.766667             | A:0.233333      |
| chr28 | 11452504 | 2 | 20 | AGG:0.7 A:0.3          |                 |
| chr28 | 11452694 | 2 | 32 | G:0.84375              | T:0.15625       |
| chr28 | 11452814 | 2 | 40 | T:0.775 C:0.225        |                 |
| chr28 | 11452912 | 2 | 38 | C:0.842105             | T:0.157895      |
| chr28 | 11452913 | 2 | 38 | A:0.684211             | G:0.315789      |
| chr28 | 11452971 | 2 | 38 | T:0.868421             | C:0.131579      |
| chr28 | 11452972 | 2 | 38 | TGTG:0.815789          | T:0.184211      |

|       |          |   |    |                  |             |
|-------|----------|---|----|------------------|-------------|
| chr28 | 11452982 | 2 | 38 | C:0.815789       | G:0.184211  |
| chr28 | 11453002 | 2 | 38 | T:0.815789       | C:0.184211  |
| chr28 | 11453120 | 2 | 40 | C:0.8 A:0.2      |             |
| chr28 | 11453144 | 2 | 38 | G:0.947368       | A:0.0526316 |
| chr28 | 11453154 | 2 | 38 | T:0.789474       | C:0.210526  |
| chr28 | 11453161 | 2 | 38 | T:0.789474       | G:0.210526  |
| chr28 | 11453179 | 2 | 38 | T:0.789474       | C:0.210526  |
| chr28 | 11453221 | 2 | 38 | G:0.815789       | A:0.184211  |
| chr28 | 11453242 | 2 | 38 | A:0.815789       | C:0.184211  |
| chr28 | 11453243 | 2 | 38 | C:0.815789       | T:0.184211  |
| chr28 | 11453355 | 2 | 38 | C:0.894737       | T:0.105263  |
| chr28 | 11453388 | 2 | 38 | C:0.710526       | CT:0.289474 |
| chr28 | 11453520 | 2 | 38 | G:0.763158       | A:0.236842  |
| chr28 | 11453524 | 2 | 38 | C:0 CT:1         |             |
| chr28 | 11453566 | 2 | 38 | G:0.789474       | A:0.210526  |
| chr28 | 11453615 | 2 | 38 | C:0.842105       | T:0.157895  |
| chr28 | 11453665 | 2 | 40 | AG:0.875 A:0.125 |             |
| chr28 | 11453669 | 2 | 40 | G:0.825 A:0.175  |             |
| chr28 | 11453727 | 2 | 40 | T:0.825 A:0.175  |             |
| chr28 | 11453737 | 2 | 40 | T:0.825 C:0.175  |             |
| chr28 | 11453738 | 2 | 40 | A:0.825 T:0.175  |             |
| chr28 | 11453762 | 2 | 40 | A:0.725 G:0.275  |             |
| chr28 | 11453969 | 2 | 38 | C:0.736842       | A:0.263158  |
| chr28 | 11454093 | 2 | 38 | GC:0.710526      | G:0.289474  |
| chr28 | 11454095 | 2 | 38 | AT:0.710526      | A:0.289474  |
| chr28 | 11454115 | 2 | 38 | C:0.710526       | T:0.289474  |
| chr28 | 11454364 | 2 | 40 | G:1 A:0          |             |
| chr28 | 11454578 | 2 | 40 | GA:0.65 G:0.35   |             |
| chr28 | 11454670 | 2 | 40 | GA:0.825 G:0.175 |             |
| chr28 | 11454721 | 2 | 38 | C:0.868421       | T:0.131579  |
| chr28 | 11454767 | 2 | 34 | C:0.882353       | G:0.117647  |
| chr28 | 11454777 | 2 | 32 | GT:1 G:0         |             |
| chr28 | 11454794 | 2 | 38 | G:0.842105       | A:0.157895  |
| chr28 | 11454897 | 2 | 38 | C:0.842105       | T:0.157895  |
| chr28 | 11454945 | 2 | 36 | G:0.861111       | A:0.138889  |
| chr28 | 11455006 | 2 | 36 | G:0.833333       | A:0.166667  |
| chr28 | 11455089 | 2 | 40 | G:0.925 A:0.075  |             |
| chr28 | 11455146 | 2 | 40 | TAGGTCAC:0.875   | T:0.125     |
| chr28 | 11455185 | 2 | 38 | C:0.947368       | A:0.0526316 |
| chr28 | 11455244 | 2 | 36 | G:0.888889       | A:0.111111  |
| chr28 | 11455431 | 2 | 36 | C:0.888889       | T:0.111111  |
| chr28 | 11455510 | 2 | 34 | A:0.882353       | G:0.117647  |
| chr28 | 11455519 | 2 | 34 | T:0.882353       | A:0.117647  |
| chr28 | 11455548 | 2 | 38 | T:0.894737       | G:0.105263  |
| chr28 | 11455648 | 2 | 38 | A:0.684211       | C:0.315789  |
| chr28 | 11456272 | 2 | 40 | T:0.7 C:0.3      |             |
| chr28 | 11456386 | 2 | 40 | A:0.825 C:0.175  |             |
| chr28 | 11456427 | 2 | 38 | C:0.736842       | T:0.263158  |
| chr28 | 11456677 | 2 | 40 | T:0.7 C:0.3      |             |
| chr28 | 11456918 | 2 | 40 | A:0.9 G:0.1      |             |
| chr28 | 11457146 | 2 | 36 | A:0.888889       | T:0.111111  |
| chr28 | 11457445 | 2 | 38 | A:0.842105       | G:0.157895  |
| chr28 | 11457551 | 2 | 40 | C:1 T:0          |             |
| chr28 | 11457766 | 2 | 34 | G:0.852941       | A:0.147059  |

|                    |          |   |    |                 |          |                 |
|--------------------|----------|---|----|-----------------|----------|-----------------|
| chr28              | 11458514 | 2 | 40 | C:1             | T:0      |                 |
| chr28              | 11458601 | 2 | 38 | G:1             | A:0      |                 |
| chr28              | 11458672 | 2 | 40 | A:0.775         | AT:0.225 |                 |
| chr28              | 11458715 | 2 | 38 | T:0.868421      |          | C:0.131579      |
| chr28              | 11458967 | 2 | 38 | T:1             | A:0      |                 |
| chr28              | 11459007 | 2 | 36 | A:1             | AG:0     |                 |
| chr28              | 11459431 | 2 | 40 | T:1             | A:0      |                 |
| chr28              | 11459445 | 2 | 40 | G:0.9           | A:0.1    |                 |
| chr28              | 11459521 | 2 | 36 | G:0.833333      |          | A:0.166667      |
| chr28              | 11459530 | 2 | 36 | G:0.888889      |          | A:0.111111      |
| chr28              | 11459536 | 2 | 38 | G:0.973684      |          | A:0.0263158     |
| chr28              | 11459549 | 2 | 40 | C:1             | T:0      |                 |
| chr28              | 11459552 | 2 | 40 | G:0.85          | A:0.15   |                 |
| chr28              | 11459572 | 2 | 40 | G:0.85          | A:0.15   |                 |
| chr28              | 11459585 | 2 | 40 | G:1             | A:0      |                 |
| chr28              | 11459667 | 2 | 38 | A:0.921053      |          | G:0.0789474     |
| chr28              | 11459673 | 2 | 38 | AT:0.657895     |          | A:0.342105      |
| chr28              | 11459680 | 2 | 38 | C:0.736842      |          | A:0.263158      |
| chr28              | 11459682 | 2 | 38 | A:0.657895      |          | C:0.342105      |
| chr28              | 11459865 | 3 | 36 | TG:0.527778     |          | T:0.305556      |
| GG:0.166667        |          |   |    |                 |          |                 |
| chr28              | 11459956 | 2 | 40 | C:0.9           | T:0.1    |                 |
| chr28              | 11460400 | 2 | 38 | C:0.789474      |          | CT:0.210526     |
| chr28              | 11460725 | 2 | 38 | T:0.815789      |          | C:0.184211      |
| chr28              | 11460854 | 2 | 36 | C:0.833333      |          | T:0.166667      |
| chr28              | 11461325 | 3 | 36 | TAA:0.444444    |          | T:0.111111      |
| TA:0.444444        |          |   |    |                 |          |                 |
| chr28              | 11461353 | 2 | 36 | C:0.777778      |          | T:0.222222      |
| chr28              | 11461437 | 2 | 40 | A:0.9           | G:0.1    |                 |
| chr28              | 11461946 | 2 | 40 | G:1             | T:0      |                 |
| chr28              | 11463041 | 2 | 40 | T:0.65          | C:0.35   |                 |
| chr28              | 11463062 | 2 | 40 | A:0.65          | G:0.35   |                 |
| chr28              | 11463108 | 2 | 40 | T:0.95          | A:0.05   |                 |
| chr28              | 11463293 | 2 | 40 | CG:0.725        | C:0.275  |                 |
| chr28              | 11463420 | 2 | 38 | T:0.631579      |          | C:0.368421      |
| chr28              | 11463474 | 2 | 40 | G:1             | T:0      |                 |
| chr28              | 11464030 | 2 | 38 | A:0.736842      |          | C:0.263158      |
| chr28              | 11464210 | 2 | 40 | T:0.575         | C:0.425  |                 |
| chr28              | 11464364 | 2 | 36 | A:0.111111      |          | T:0.888889      |
| chr28              | 11464436 | 2 | 34 | C:1             | A:0      |                 |
| chr28              | 11465027 | 2 | 38 | C:0.631579      |          | G:0.368421      |
| chr28              | 11465227 | 2 | 40 | G:0.8           | T:0.2    |                 |
| chr28              | 11465587 | 2 | 40 | T:0.65          | C:0.35   |                 |
| chr28              | 11465771 | 2 | 40 | T:0.775         | G:0.225  |                 |
| chr28              | 11466352 | 2 | 38 | T:0.657895      |          | C:0.342105      |
| chr28              | 11466397 | 2 | 36 | G:0.916667      |          | A:0.0833333     |
| chr28              | 11466444 | 2 | 38 | A:0.657895      |          | G:0.342105      |
| chr28              | 11467469 | 2 | 38 | C:0.973684      |          | A:0.0263158     |
| chr28              | 11467596 | 4 | 40 | AGGATGGAT:0.575 |          | A:0.275 AGGAT:0 |
| AGGATGGATGGAT:0.15 |          |   |    |                 |          |                 |
| chr28              | 11469003 | 2 | 38 | G:0.894737      |          | A:0.105263      |
| chr28              | 11469347 | 2 | 40 | T:0.65          | C:0.35   |                 |
| chr28              | 11469374 | 2 | 40 | A:0.875         | T:0.125  |                 |
| chr28              | 11469448 | 2 | 38 | G:1             | A:0      |                 |

|       |          |   |    |                          |             |
|-------|----------|---|----|--------------------------|-------------|
| chr28 | 11469466 | 2 | 40 | C:0.975                  | T:0.025     |
| chr28 | 11469490 | 2 | 40 | G:0.85                   | A:0.15      |
| chr28 | 11469498 | 2 | 40 | A:0.875                  | G:0.125     |
| chr28 | 11469666 | 2 | 40 | G:0.95                   | C:0.05      |
| chr28 | 11469897 | 2 | 38 | G:1                      | C:0         |
| chr28 | 11470230 | 2 | 38 | T:1                      | C:0         |
| chr28 | 11470342 | 2 | 38 | TGTC A:0.947368          | T:0.0526316 |
| chr28 | 11471124 | 2 | 36 | G:0.861111               | C:0.138889  |
| chr28 | 11471161 | 2 | 38 | G:1                      | A:0         |
| chr28 | 11471168 | 2 | 38 | C:1                      | T:0         |
| chr28 | 11471323 | 2 | 40 | GATATAAATCTGCACACA:0.775 | G:0.225     |
| chr28 | 11471334 | 2 | 40 | G:0.875                  | A:0.125     |
| chr28 | 11471434 | 2 | 38 | C:0.763158               | T:0.236842  |
| chr28 | 11471804 | 2 | 38 | T:0.763158               | G:0.236842  |
| chr28 | 11471966 | 2 | 40 | T:0.8                    | C:0.2       |
| chr28 | 11472208 | 2 | 40 | A:0.775                  | G:0.225     |
| chr28 | 11472488 | 2 | 40 | T:0.65                   | G:0.35      |
| chr28 | 11472688 | 2 | 32 | G:0.78125                | A:0.21875   |
| chr28 | 11472799 | 2 | 40 | C:0.825                  | T:0.175     |
| chr28 | 11472986 | 2 | 38 | T:0.973684               | C:0.0263158 |
| chr28 | 11473001 | 2 | 38 | C:0.763158               | T:0.236842  |
| chr28 | 11473356 | 2 | 40 | C:0.75                   | G:0.25      |
| chr28 | 11473384 | 2 | 38 | G:1                      | T:0         |
| chr28 | 11473414 | 2 | 40 | A:0.975                  | T:0.025     |
| chr28 | 11473688 | 2 | 40 | A:1                      | G:0         |
| chr28 | 11474130 | 2 | 40 | T:0.875                  | C:0.125     |
| chr28 | 11474197 | 2 | 40 | T:0.85                   | C:0.15      |
| chr28 | 11474961 | 2 | 36 | G:0.916667               | A:0.0833333 |
| chr28 | 11475340 | 2 | 38 | A:0.868421               | G:0.131579  |
| chr28 | 11475421 | 2 | 40 | G:0.875                  | C:0.125     |
| chr28 | 11475581 | 2 | 38 | GT:0.710526              | G:0.289474  |
| chr28 | 11475811 | 2 | 38 | G:0.894737               | A:0.105263  |
| chr28 | 11476024 | 2 | 38 | G:0.894737               | A:0.105263  |
| chr28 | 11476538 | 2 | 38 | A:0.868421               | G:0.131579  |
| chr28 | 11476652 | 2 | 36 | G:0.916667               | A:0.0833333 |
| chr28 | 11476824 | 2 | 38 | G:0.868421               | A:0.131579  |
| chr28 | 11477140 | 2 | 36 | G:0.888889               | A:0.111111  |
| chr28 | 11477164 | 2 | 36 | G:1                      | C:0         |
| chr28 | 11477263 | 2 | 40 | C:1                      | CATATCTT:0  |
| chr28 | 11477418 | 2 | 38 | C:0.894737               | T:0.105263  |
| chr28 | 11477480 | 2 | 40 | T:0.9                    | G:0.1       |
| chr28 | 11477587 | 2 | 38 | T:0.868421               | C:0.131579  |
| chr28 | 11477592 | 2 | 38 | C:0.868421               | G:0.131579  |
| chr28 | 11477687 | 2 | 40 | G:0.875                  | T:0.125     |
| chr28 | 11477721 | 2 | 40 | C:0.9                    | T:0.1       |
| chr28 | 11477917 | 2 | 40 | G:0.525                  | C:0.475     |
| chr28 | 11477984 | 2 | 40 | C:0.875                  | T:0.125     |
| chr28 | 11478176 | 2 | 34 | C:0.794118               | G:0.205882  |
| chr28 | 11478211 | 2 | 36 | T:0.861111               | C:0.138889  |
| chr28 | 11478307 | 2 | 38 | T:0.894737               | C:0.105263  |
| chr28 | 11478461 | 2 | 38 | G:0.868421               | A:0.131579  |
| chr28 | 11478477 | 2 | 38 | T:0.894737               | C:0.105263  |
| chr28 | 11478481 | 3 | 38 | C:0.894737               | T:0.105263  |

G:0

|       |          |   |    |            |                |             |
|-------|----------|---|----|------------|----------------|-------------|
| chr28 | 11478581 | 2 | 40 | G:0.9      | C:0.1          |             |
| chr28 | 11478646 | 2 | 40 | T:1        | C:0            |             |
| chr28 | 11478861 | 2 | 38 | C:0.894737 |                | A:0.105263  |
| chr28 | 11478872 | 2 | 38 | A:0.894737 |                | G:0.105263  |
| chr28 | 11478879 | 2 | 38 | T:0.763158 |                | C:0.236842  |
| chr28 | 11479017 | 2 | 40 | A:0.925    | G:0.075        |             |
| chr28 | 11480928 | 2 | 38 | G:0.789474 |                | T:0.210526  |
| chr28 | 11481038 | 2 | 40 | A:0.65     | G:0.35         |             |
| chr28 | 11481693 | 2 | 36 | G:0.805556 |                | T:0.194444  |
| chr28 | 11482073 | 2 | 40 | G:0.8      | A:0.2          |             |
| chr28 | 11482106 | 2 | 40 | G:0.875    | GA:0.125       |             |
| chr28 | 11482887 | 2 | 40 | G:0.85     | T:0.15         |             |
| chr28 | 11483039 | 2 | 36 | C:1        | G:0            |             |
| chr28 | 11483102 | 2 | 36 | G:0.861111 |                | GT:0.138889 |
| chr28 | 11483166 | 2 | 38 | C:1        | A:0            |             |
| chr28 | 11483215 | 2 | 36 | A:0.833333 |                | C:0.166667  |
| chr28 | 11483322 | 2 | 38 | T:1        | C:0            |             |
| chr28 | 11483461 | 2 | 40 | G:1        | A:0            |             |
| chr28 | 11483593 | 2 | 36 | T:0.805556 |                | C:0.194444  |
| chr28 | 11483649 | 2 | 36 | T:1        | C:0            |             |
| chr28 | 11483657 | 2 | 36 | C:0.805556 |                | T:0.194444  |
| chr28 | 11483764 | 2 | 36 | T:0.861111 |                | C:0.138889  |
| chr28 | 11483777 | 2 | 36 | A:0.861111 |                | G:0.138889  |
| chr28 | 11483812 | 2 | 40 | A:1        | AAAAGAAAAG:0   |             |
| chr28 | 11483849 | 2 | 38 | A:0.631579 |                | G:0.368421  |
| chr28 | 11484111 | 2 | 40 | C:0.7      | T:0.3          |             |
| chr28 | 11484522 | 2 | 34 | T:0.823529 |                | C:0.176471  |
| chr28 | 11484626 | 2 | 38 | G:0.868421 |                | C:0.131579  |
| chr28 | 11484728 | 2 | 36 | C:0.805556 |                | T:0.194444  |
| chr28 | 11484740 | 2 | 36 | C:1        | T:0            |             |
| chr28 | 11484799 | 2 | 36 | C:0.861111 |                | T:0.138889  |
| chr28 | 11484800 | 2 | 36 | G:1        | A:0            |             |
| chr28 | 11484987 | 2 | 38 | G:1        | A:0            |             |
| chr28 | 11485184 | 2 | 34 | T:1        | C:0            |             |
| chr28 | 11485308 | 2 | 38 | G:0.894737 |                | A:0.105263  |
| chr28 | 11485412 | 2 | 38 | G:1        | A:0            |             |
| chr28 | 11485563 | 2 | 40 | CT:0.8     | C:0.2          |             |
| chr28 | 11485583 | 2 | 40 | A:0.85     | G:0.15         |             |
| chr28 | 11485671 | 3 | 38 | A:0.763158 |                | C:0.236842  |
| T:0   |          |   |    |            |                |             |
| chr28 | 11485684 | 2 | 38 | C:1        | T:0            |             |
| chr28 | 11485793 | 2 | 40 | C:1        | T:0            |             |
| chr28 | 11485949 | 2 | 40 | G:0.875    | T:0.125        |             |
| chr28 | 11485966 | 2 | 40 | T:0.775    | TGTTTTTG:0.225 |             |
| chr28 | 11486019 | 2 | 36 | T:0.805556 |                | C:0.194444  |
| chr28 | 11486116 | 2 | 40 | G:0.95     | A:0.05         |             |
| chr28 | 11486158 | 2 | 40 | G:0.825    | A:0.175        |             |
| chr28 | 11486231 | 2 | 38 | T:1        | C:0            |             |
| chr28 | 11486251 | 2 | 36 | C:1        | G:0            |             |
| chr28 | 11486293 | 2 | 36 | T:0.638889 |                | TG:0.361111 |
| chr28 | 11486369 | 2 | 40 | A:0.825    | T:0.175        |             |
| chr28 | 11486603 | 2 | 36 | T:0.666667 |                | C:0.333333  |
| chr28 | 11486821 | 2 | 36 | C:0.888889 |                | T:0.111111  |
| chr28 | 11486830 | 2 | 36 | A:0.611111 |                | G:0.388889  |



|       |          |   |    |              |             |             |
|-------|----------|---|----|--------------|-------------|-------------|
| chr28 | 11486883 | 2 | 38 | A:1          | G:0         |             |
| chr28 | 11487163 | 2 | 38 | G:1          | T:0         |             |
| chr28 | 11487466 | 2 | 40 | T:0.95       | C:0.05      |             |
| chr28 | 11487880 | 2 | 34 | T:0.705882   |             | C:0.294118  |
| chr28 | 11488166 | 2 | 36 | C:0.972222   |             | T:0.0277778 |
| chr28 | 11488286 | 2 | 38 | TGC:0.868421 |             | T:0.131579  |
| chr28 | 11488289 | 2 | 40 | G:0.825      | GCTCT:0.175 |             |
| chr28 | 11488291 | 2 | 40 | G:0.7        | T:0.3       |             |
| chr28 | 11488341 | 2 | 40 | A:0.575      | G:0.425     |             |
| chr28 | 11488740 | 2 | 40 | G:0.925      | A:0.075     |             |
| chr28 | 11488817 | 2 | 40 | G:0.975      | A:0.025     |             |
| chr28 | 11488832 | 2 | 38 | C:0.552632   |             | G:0.447368  |
| chr28 | 11489578 | 2 | 34 | G:0.941176   |             | A:0.0588235 |
| chr28 | 11489756 | 2 | 34 | T:0.588235   |             | TA:0.411765 |
| chr28 | 11489966 | 2 | 36 | G:1          | A:0         |             |
| chr28 | 11490486 | 2 | 38 | G:1          | A:0         |             |
| chr28 | 11490715 | 2 | 40 | A:0.7        | G:0.3       |             |
| chr28 | 11490799 | 2 | 38 | T:1          | A:0         |             |
| chr28 | 11490936 | 2 | 40 | A:0.875      | G:0.125     |             |
| chr28 | 11490937 | 2 | 40 | T:0.875      | C:0.125     |             |
| chr28 | 11490945 | 2 | 40 | G:0.875      | T:0.125     |             |
| chr28 | 11491365 | 2 | 38 | C:0.868421   |             | G:0.131579  |
| chr28 | 11491994 | 2 | 40 | A:0          | AACT:1      |             |
| chr28 | 11492273 | 2 | 40 | A:0.925      | G:0.075     |             |
| chr28 | 11492868 | 2 | 32 | AG:0         | A:1         |             |
| chr28 | 11493620 | 2 | 38 | C:1          | A:0         |             |
| chr28 | 11493665 | 2 | 34 | CG:0.941176  |             | C:0.0588235 |
| chr28 | 11493738 | 2 | 30 | G:0.9        | A:0.1       |             |
| chr28 | 11494754 | 2 | 34 | G:0.764706   |             | A:0.235294  |
| chr28 | 11494775 | 2 | 34 | AG:0.911765  |             | A:0.0882353 |
| chr28 | 11495053 | 2 | 40 | T:0.925      | C:0.075     |             |
| chr28 | 11495155 | 2 | 40 | C:0.925      | T:0.075     |             |
| chr28 | 11495639 | 2 | 40 | G:0.875      | A:0.125     |             |
| chr28 | 11495958 | 2 | 40 | G:0.925      | A:0.075     |             |
| chr28 | 11496440 | 2 | 40 | C:0.85       | T:0.15      |             |
| chr28 | 11496629 | 2 | 40 | G:0.925      | A:0.075     |             |
| chr28 | 11496751 | 2 | 36 | G:0.861111   |             | GT:0.138889 |
| chr28 | 11496843 | 2 | 38 | G:0.868421   |             | A:0.131579  |
| chr28 | 11496867 | 2 | 38 | C:0.868421   |             | T:0.131579  |
| chr28 | 11497063 | 2 | 40 | T:0.85       | C:0.15      |             |
| chr28 | 11497560 | 2 | 40 | C:0.875      | T:0.125     |             |
| chr28 | 11497797 | 2 | 40 | T:0.9        | A:0.1       |             |
| chr28 | 11497809 | 2 | 40 | TA:0.9       | T:0.1       |             |
| chr28 | 11498015 | 2 | 38 | A:0.894737   |             | AT:0.105263 |
| chr28 | 11499679 | 2 | 38 | A:0.894737   |             | G:0.105263  |
| chr28 | 11501918 | 2 | 38 | T:0.868421   |             | C:0.131579  |
| chr28 | 11502579 | 2 | 40 | A:0.9        | G:0.1       |             |
| chr28 | 11502629 | 2 | 40 | T:0.875      | C:0.125     |             |
| chr28 | 11502635 | 2 | 40 | A:0.875      | G:0.125     |             |
| chr28 | 11502653 | 2 | 40 | C:0.875      | T:0.125     |             |
| chr28 | 11502734 | 2 | 36 | A:0.833333   |             | C:0.166667  |
| chr28 | 11503113 | 2 | 38 | A:0.868421   |             | G:0.131579  |
| chr28 | 11503177 | 2 | 40 | T:0.925      | C:0.075     |             |
| chr28 | 11503288 | 2 | 40 | A:0.8        | G:0.2       |             |

|                                                            |          |   |    |              |            |                       |
|------------------------------------------------------------|----------|---|----|--------------|------------|-----------------------|
| chr28                                                      | 11503334 | 2 | 40 | G:0.825      | A:0.175    |                       |
| chr28                                                      | 11503634 | 2 | 38 | T:0.842105   |            | C:0.157895            |
| chr28                                                      | 11504069 | 2 | 38 | G:0.868421   |            | A:0.131579            |
| chr28                                                      | 11504071 | 2 | 38 | T:0.868421   |            | C:0.131579            |
| chr28                                                      | 11504334 | 2 | 22 | ACC:0.772727 |            | A:0.227273            |
| chr28                                                      | 11504721 | 2 | 40 | CCATTTTT:0.9 |            | C:0.1                 |
| chr28                                                      | 11505153 | 2 | 38 | G:0.815789   |            | T:0.184211            |
| chr28                                                      | 11505207 | 2 | 40 | G:0.85       | A:0.15     |                       |
| chr28                                                      | 11505367 | 2 | 40 | A:0.875      | G:0.125    |                       |
| chr28                                                      | 11505524 | 2 | 36 | C:0.861111   |            | T:0.138889            |
| chr28                                                      | 11505676 | 2 | 38 | C:1          | T:0        |                       |
| chr28                                                      | 11505773 | 2 | 36 | G:0.972222   |            | GA:0.0277778          |
| chr28                                                      | 11505867 | 2 | 40 | G:0.925      | A:0.075    |                       |
| chr28                                                      | 11506135 | 3 | 40 | CCT:0.85     | C:0.15     | CCTCTCT:0             |
| chr28                                                      | 11506272 | 2 | 38 | T:0.894737   |            | C:0.105263            |
| chr28                                                      | 11506414 | 2 | 38 | A:0.868421   |            | G:0.131579            |
| chr28                                                      | 11506817 | 2 | 38 | AC:0.973684  |            | A:0.0263158           |
| chr28                                                      | 11507238 | 3 | 40 | TTG:0.675    |            | T:0.3 TTGTG:<br>0.025 |
| chr28                                                      | 11507382 | 2 | 40 | A:0.825      | G:0.175    |                       |
| chr28                                                      | 11507492 | 2 | 38 | A:0.973684   |            | T:0.0263158           |
| chr28                                                      | 11507572 | 2 | 38 | C:0.973684   |            | A:0.0263158           |
| chr28                                                      | 11507680 | 2 | 38 | G:0.973684   |            | A:0.0263158           |
| chr28                                                      | 11507821 | 2 | 40 | T:0.875      | C:0.125    |                       |
| chr28                                                      | 11507946 | 2 | 38 | G:0.868421   |            | T:0.131579            |
| chr28                                                      | 11508055 | 2 | 36 | A:0.972222   |            | G:0.0277778           |
| chr28                                                      | 11508165 | 2 | 36 | C:1          | T:0        |                       |
| chr28                                                      | 11509514 | 2 | 34 | CT:0.735294  |            | C:0.264706            |
| chr28                                                      | 11509614 | 2 | 38 | G:0.973684   |            | T:0.0263158           |
| chr28                                                      | 11510272 | 2 | 38 | T:0.973684   |            | G:0.0263158           |
| chr28                                                      | 11511212 | 2 | 40 | C:0.975      |            |                       |
| CGCCTTGATTATGATACTACACTTGATCTTAGCCAAAAGGCCGAGAAGCGAT:0.025 |          |   |    |              |            |                       |
| chr28                                                      | 11511222 | 2 | 40 | A:1          | G:0        |                       |
| chr28                                                      | 11511233 | 2 | 40 | A:1          | G:0        |                       |
| chr28                                                      | 11511316 | 2 | 40 | C:0.975      | T:0.025    |                       |
| chr28                                                      | 11511841 | 2 | 38 | T:0.894737   |            | C:0.105263            |
| chr28                                                      | 11511913 | 2 | 40 | C:1          | T:0        |                       |
| chr28                                                      | 11512011 | 2 | 38 | TTG:0        | T:1        |                       |
| chr28                                                      | 11512407 | 2 | 38 | A:1          | T:0        |                       |
| chr28                                                      | 11513140 | 2 | 36 | CT:0.638889  |            | C:0.361111            |
| chr28                                                      | 11513530 | 2 | 40 | A:0.95       | G:0.05     |                       |
| chr28                                                      | 11513642 | 2 | 40 | C:0.9        | T:0.1      |                       |
| chr28                                                      | 11514371 | 2 | 38 | T:0.947368   |            | C:0.0526316           |
| chr28                                                      | 11514674 | 2 | 40 | C:0          | CA:1       |                       |
| chr28                                                      | 11514693 | 2 | 40 | C:0          | T:1        |                       |
| chr28                                                      | 11514765 | 2 | 40 | A:1          | T:0        |                       |
| chr28                                                      | 11514797 | 2 | 40 | G:0.875      | GATT:0.125 |                       |
| chr28                                                      | 11514978 | 2 | 36 | C:0.777778   |            | G:0.222222            |
| chr28                                                      | 11515167 | 2 | 40 | GCTGT:0.85   |            | G:0.15                |
| chr28                                                      | 11515383 | 2 | 40 | T:0.85       | C:0.15     |                       |
| chr28                                                      | 11515793 | 2 | 38 | C:0.842105   |            | G:0.157895            |
| chr28                                                      | 11516163 | 2 | 40 | CAAGAT:0.875 |            | C:0.125               |
| chr28                                                      | 11516390 | 2 | 40 | C:0.9        | CCCA:0.1   |                       |
| chr28                                                      | 11516429 | 2 | 38 | C:0.894737   |            | T:0.105263            |

|       |          |   |    |             |              |                  |
|-------|----------|---|----|-------------|--------------|------------------|
| chr28 | 11516463 | 2 | 40 | C:1         | T:0          |                  |
| chr28 | 11516757 | 2 | 36 | G:0.833333  |              | A:0.166667       |
| chr28 | 11516761 | 2 | 36 | A:0.666667  |              | G:0.333333       |
| chr28 | 11516798 | 2 | 40 | C:0.85      | T:0.15       |                  |
| chr28 | 11517070 | 2 | 36 | G:0.833333  |              | C:0.166667       |
| chr28 | 11517763 | 2 | 40 | A:0.875     | T:0.125      |                  |
| chr28 | 11517929 | 2 | 34 | C:0.823529  |              | T:0.176471       |
| chr28 | 11518074 | 2 | 36 | C:1         | T:0          |                  |
| chr28 | 11518205 | 2 | 38 | G:0.842105  |              | A:0.157895       |
| chr28 | 11518482 | 2 | 38 | G:0.552632  |              | A:0.447368       |
| chr28 | 11518915 | 2 | 34 | C:0.911765  |              | T:0.0882353      |
| chr28 | 11519820 | 2 | 40 | G:0.8       | A:0.2        |                  |
| chr28 | 11520070 | 2 | 40 | A:0.6       | C:0.4        |                  |
| chr28 | 11520739 | 2 | 40 | A:0.725     | ATTTAT:0.275 |                  |
| chr28 | 11521589 | 2 | 40 | TCGC:0.65   |              | T:0.35           |
| chr28 | 11521714 | 2 | 40 | C:0.65      | A:0.35       |                  |
| chr28 | 11522169 | 2 | 40 | C:0.675     | T:0.325      |                  |
| chr28 | 11522337 | 2 | 34 | CT:0.941176 |              | C:0.0588235      |
| chr28 | 11522354 | 4 | 40 | T:0.675     | C:0.15       | TC:0.075 TTC:0.1 |
| chr28 | 11522935 | 2 | 38 | TA:0.605263 |              | T:0.394737       |
| chr28 | 11523560 | 2 | 16 | G:0.3125    | GC:0.6875    |                  |
| chr28 | 11524592 | 2 | 40 | C:0.55      | T:0.45       |                  |
| chr28 | 11525728 | 2 | 38 | A:0.5       | G:0.5        |                  |
| chr28 | 11526058 | 2 | 34 | G:1         | A:0          |                  |
| chr28 | 11527611 | 2 | 38 | T:0.710526  |              | C:0.289474       |
| chr28 | 11528478 | 2 | 40 | G:0.9       | A:0.1        |                  |
| chr28 | 11530233 | 2 | 36 | C:0         | CG:1         |                  |
| chr28 | 11530244 | 2 | 38 | A:0         | C:1          |                  |
| chr28 | 11530269 | 2 | 38 | C:0         | CA:1         |                  |
| chr28 | 11530274 | 2 | 38 | AT:0        | A:1          |                  |
| chr28 | 11530369 | 2 | 36 | G:0.5       | A:0.5        |                  |
| chr28 | 11530818 | 2 | 40 | C:0.925     | G:0.075      |                  |
| chr28 | 11530874 | 2 | 40 | C:0.95      | T:0.05       |                  |
| chr28 | 11531543 | 2 | 38 | G:0.736842  |              | T:0.263158       |
| chr28 | 11532105 | 2 | 40 | T:1         | TGAGA:0      |                  |
| chr28 | 11532111 | 2 | 40 | A:0.9       | G:0.1        |                  |
| chr28 | 11532192 | 2 | 40 | G:1         | A:0          |                  |
| chr28 | 11532549 | 2 | 40 | G:0.925     | A:0.075      |                  |
| chr28 | 11532847 | 2 | 40 | T:0.9       | TACCAC:0.1   |                  |
| chr28 | 11533505 | 2 | 40 | T:0.65      | A:0.35       |                  |
| chr28 | 11533827 | 2 | 40 | A:0.9       | G:0.1        |                  |
| chr28 | 11533856 | 2 | 38 | T:1         | A:0          |                  |
| chr28 | 11533911 | 2 | 38 | T:0.526316  |              | C:0.473684       |
| chr28 | 11533989 | 2 | 36 | C:0.611111  |              | CAG:0.388889     |
| chr28 | 11534005 | 2 | 36 | C:0.888889  |              | T:0.111111       |
| chr28 | 11534124 | 2 | 40 | T:0.925     | C:0.075      |                  |
| chr28 | 11534183 | 2 | 38 | C:0.894737  |              | CT:0.105263      |
| chr28 | 11534650 | 2 | 38 | G:0.973684  |              | A:0.0263158      |
| chr28 | 11534799 | 2 | 40 | C:1         | T:0          |                  |
| chr28 | 11535501 | 2 | 38 | C:0.815789  |              | T:0.184211       |
| chr28 | 11535645 | 2 | 34 | G:0.970588  |              | GA:0.0294118     |
| chr28 | 11535897 | 2 | 40 | C:0.975     | T:0.025      |                  |
| chr28 | 11535924 | 2 | 40 | C:0.95      | T:0.05       |                  |
| chr28 | 11535926 | 2 | 40 | C:0.95      | G:0.05       |                  |

|                       |            |    |                |           |              |
|-----------------------|------------|----|----------------|-----------|--------------|
| chr28                 | 11536344 2 | 38 | C:1            | A:0       |              |
| chr28                 | 11536414 2 | 40 | G:1            | A:0       |              |
| chr28                 | 11536599 2 | 38 | CT:0.526316    |           | C:0.473684   |
| chr28                 | 11536711 2 | 38 | G:1            | GA:0      |              |
| chr28                 | 11537054 3 | 38 | GTCTC:0.684211 |           | G:0.263158   |
| GTCTCTCTCTC:0.0526316 |            |    |                |           |              |
| chr28                 | 11537056 2 | 38 | C:0.973684     |           | CTCTCTCTG:   |
| 0.0263158             |            |    |                |           |              |
| chr28                 | 11537152 2 | 40 | T:1            | C:0       |              |
| chr28                 | 11537281 2 | 34 | G:0.970588     |           | A:0.0294118  |
| chr28                 | 11537416 2 | 40 | G:0.55         | A:0.45    |              |
| chr28                 | 11537696 2 | 36 | C:0.944444     |           | T:0.0555556  |
| chr28                 | 11538009 2 | 40 | A:0.425        | C:0.575   |              |
| chr28                 | 11538294 2 | 40 | T:1            | TC:0      |              |
| chr28                 | 11538675 2 | 34 | T:0.941176     |           | C:0.0588235  |
| chr28                 | 11538753 2 | 40 | A:0.4          | G:0.6     |              |
| chr28                 | 11539134 2 | 38 | GC:0.605263    |           | G:0.394737   |
| chr28                 | 11539147 2 | 40 | T:0.625        | C:0.375   |              |
| chr28                 | 11539150 2 | 40 | T:0.05         | C:0.95    |              |
| chr28                 | 11539227 2 | 40 | G:0.5          | T:0.5     |              |
| chr28                 | 11539262 2 | 40 | C:1            | T:0       |              |
| chr28                 | 11540390 2 | 38 | C:1            | T:0       |              |
| chr28                 | 11540567 2 | 40 | C:0.95         | T:0.05    |              |
| chr28                 | 11540668 2 | 40 | C:0.95         | T:0.05    |              |
| chr28                 | 11540718 2 | 40 | G:0.675        | C:0.325   |              |
| chr28                 | 11540928 2 | 38 | G:0.684211     |           | A:0.315789   |
| chr28                 | 11541108 2 | 38 | A:0.105263     |           | C:0.894737   |
| chr28                 | 11541429 2 | 38 | G:0.342105     |           | A:0.657895   |
| chr28                 | 11541457 2 | 38 | G:1            | T:0       |              |
| chr28                 | 11541535 2 | 38 | G:0.447368     |           | A:0.552632   |
| chr28                 | 11541554 2 | 38 | C:1            | A:0       |              |
| chr28                 | 11542693 2 | 40 | C:0.4          | T:0.6     |              |
| chr28                 | 11543092 2 | 38 | G:0.0789474    |           | GCC:0.921053 |
| chr28                 | 11543557 2 | 36 | A:0.694444     |           | C:0.305556   |
| chr28                 | 11543704 2 | 40 | A:0.225        | G:0.775   |              |
| chr28                 | 11543708 2 | 40 | A:0.925        | C:0.075   |              |
| chr28                 | 11543713 2 | 40 | A:0.225        | C:0.775   |              |
| chr28                 | 11544014 2 | 40 | G:1            | A:0       |              |
| chr28                 | 11544060 2 | 40 | A:0.5          | G:0.5     |              |
| chr28                 | 11544073 2 | 40 | C:0.5          | T:0.5     |              |
| chr28                 | 11544252 2 | 34 | C:0.970588     |           | T:0.0294118  |
| chr28                 | 11544280 2 | 38 | A:0.789474     |           | G:0.210526   |
| chr28                 | 11544391 2 | 38 | C:0.421053     |           | T:0.578947   |
| chr28                 | 11544484 2 | 40 | C:0.25         | T:0.75    |              |
| chr28                 | 11544499 2 | 40 | G:0.525        | GCT:0.475 |              |
| chr28                 | 11544581 2 | 40 | G:0.45         | A:0.55    |              |
| chr28                 | 11544714 2 | 36 | T:0.0833333    |           | TG:0.916667  |
| chr28                 | 11544717 2 | 38 | A:0.973684     |           | G:0.0263158  |
| chr28                 | 11544799 2 | 36 | G:0.194444     |           | T:0.805556   |
| chr28                 | 11544827 2 | 40 | T:0.5          | C:0.5     |              |
| chr28                 | 11544877 2 | 38 | GTGT:0.973684  |           | G:0.0263158  |
| chr28                 | 11544883 2 | 38 | GT:0.447368    |           | G:0.552632   |
| chr28                 | 11544890 2 | 38 | G:0.973684     |           | GC:0.0263158 |
| chr28                 | 11544914 2 | 38 | T:0.236842     |           | C:0.763158   |

|       |          |   |    |                  |                   |
|-------|----------|---|----|------------------|-------------------|
| chr28 | 11544988 | 2 | 38 | C:0.184211       | T:0.815789        |
| chr28 | 11545100 | 2 | 34 | G:0.970588       | GC:0.0294118      |
| chr28 | 11545302 | 2 | 40 | C:0.95 T:0.05    |                   |
| chr28 | 11545375 | 2 | 36 | A:0.972222       | G:0.0277778       |
| chr28 | 11545391 | 2 | 36 | A:0.388889       | C:0.611111        |
| chr28 | 11545565 | 2 | 38 | G:0.184211       | T:0.815789        |
| chr28 | 11545679 | 2 | 36 | T:1 C:0          |                   |
| chr28 | 11545691 | 2 | 38 | T:0.421053       | TG:0.578947       |
| chr28 | 11545745 | 2 | 38 | C:0.947368       | CCTGCTT:0.0526316 |
| chr28 | 11545856 | 2 | 36 | G:0.111111       | C:0.888889        |
| chr28 | 11545895 | 2 | 38 | A:0.236842       | G:0.763158        |
| chr28 | 11545936 | 2 | 40 | G:0.225 T:0.775  |                   |
| chr28 | 11545944 | 2 | 40 | T:0.225 C:0.775  |                   |
| chr28 | 11546339 | 2 | 32 | C:0.65625        | G:0.34375         |
| chr28 | 11546711 | 2 | 32 | T:0 C:1          |                   |
| chr28 | 11547246 | 2 | 38 | C:0.710526       | T:0.289474        |
| chr28 | 11547749 | 2 | 38 | T:0.710526       | C:0.289474        |
| chr28 | 11547825 | 2 | 36 | G:0.805556       | A:0.194444        |
| chr28 | 11547909 | 2 | 36 | A:0.75 G:0.25    |                   |
| chr28 | 11547965 | 2 | 38 | G:0.763158       | A:0.236842        |
| chr28 | 11548201 | 2 | 38 | GGC:0.657895     | G:0.342105        |
| chr28 | 11548684 | 2 | 40 | A:0.7 C:0.3      |                   |
| chr28 | 11548728 | 2 | 38 | G:0.657895       | A:0.342105        |
| chr28 | 11548790 | 2 | 38 | T:0.421053       | C:0.578947        |
| chr28 | 11548905 | 2 | 38 | T:0.684211       | C:0.315789        |
| chr28 | 11549158 | 2 | 38 | C:0.763158       | T:0.236842        |
| chr28 | 11549225 | 2 | 38 | G:0.578947       | C:0.421053        |
| chr28 | 11549422 | 2 | 38 | G:1 A:0          |                   |
| chr28 | 11549854 | 2 | 40 | GC:0.675 G:0.325 |                   |
| chr28 | 11549886 | 2 | 38 | A:0.157895       | C:0.842105        |
| chr28 | 11550451 | 2 | 40 | G:0.675 T:0.325  |                   |
| chr28 | 11550453 | 2 | 40 | C:0.675 T:0.325  |                   |
| chr28 | 11550474 | 2 | 40 | C:0.725 T:0.275  |                   |
| chr28 | 11550527 | 2 | 38 | T:0.210526       | C:0.789474        |
| chr28 | 11550532 | 2 | 38 | A:0.736842       | G:0.263158        |
| chr28 | 11550589 | 2 | 38 | G:0.710526       | GA:0.289474       |
| chr28 | 11551403 | 2 | 36 | T:1 C:0          |                   |
| chr28 | 11551428 | 2 | 36 | G:0.444444       | A:0.555556        |
| chr28 | 11551678 | 2 | 40 | C:0.725 A:0.275  |                   |
| chr28 | 11551766 | 2 | 38 | A:0.526316       | G:0.473684        |
| chr28 | 11552315 | 2 | 36 | C:0.583333       | T:0.416667        |
| chr28 | 11552628 | 2 | 40 | G:0.45 C:0.55    |                   |
| chr28 | 11552797 | 2 | 40 | A:0.1 G:0.9      |                   |
| chr28 | 11552898 | 2 | 36 | G:0.444444       | A:0.555556        |
| chr28 | 11552956 | 2 | 34 | C:0.941176       | T:0.0588235       |
| chr28 | 11553028 | 2 | 36 | C:0.5 T:0.5      |                   |
| chr28 | 11553058 | 2 | 38 | C:1 A:0          |                   |
| chr28 | 11553744 | 2 | 20 | G:0.65 A:0.35    |                   |
| chr28 | 11553875 | 2 | 22 | A:0.0909091      | C:0.909091        |
| chr28 | 11554042 | 2 | 38 | G:0.657895       | A:0.342105        |
| chr28 | 11554074 | 2 | 36 | C:0.555556       | T:0.444444        |
| chr28 | 11554165 | 2 | 36 | G:1 T:0          |                   |
| chr28 | 11554424 | 2 | 38 | T:0.578947       | C:0.421053        |
| chr28 | 11554540 | 2 | 40 | G:0.475 A:0.525  |                   |

|                                            |          |   |    |                        |             |
|--------------------------------------------|----------|---|----|------------------------|-------------|
| chr28                                      | 11554663 | 3 | 38 | AC:0.236842            | A:0.394737  |
| ACC:0.368421                               |          |   |    |                        |             |
| chr28                                      | 11555304 | 2 | 40 | A:1                    | C:0         |
| chr28                                      | 11555340 | 2 | 36 | C:0.472222             | A:0.527778  |
| chr28                                      | 11555434 | 2 | 40 | A:0.1                  | G:0.9       |
| chr28                                      | 11555462 | 2 | 38 | A:0.605263             | AC:0.394737 |
| chr28                                      | 11555463 | 2 | 38 | G:0.131579             | C:0.868421  |
| chr28                                      | 11555641 | 2 | 40 | C:0.475                | T:0.525     |
| chr28                                      | 11556141 | 2 | 40 | G:0.525                | A:0.475     |
| chr28                                      | 11556147 | 2 | 40 | C:0.975                | T:0.025     |
| chr28                                      | 11556157 | 2 | 38 | C:0.947368             | T:0.0526316 |
| chr28                                      | 11556412 | 2 | 40 | C:0.725                | G:0.275     |
| chr28                                      | 11556493 | 2 | 40 | A:0.675                | G:0.325     |
| chr28                                      | 11556601 | 2 | 40 | G:0.625                | A:0.375     |
| chr28                                      | 11556642 | 2 | 40 | A:0.625                | G:0.375     |
| chr28                                      | 11556693 | 3 | 40 | TAC:0.3                | T:0.475     |
| TACACAC:0.225                              |          |   |    |                        |             |
| chr28                                      | 11556796 | 2 | 40 | A:0.675                | G:0.325     |
| chr28                                      | 11557075 | 2 | 30 | A:0.0333333            | G:0.966667  |
| chr28                                      | 11557107 | 2 | 36 | C:0.666667             | T:0.333333  |
| chr28                                      | 11557257 | 2 | 38 | TGG:0.631579           | T:0.368421  |
| chr28                                      | 11557409 | 2 | 40 | TCC:0.675              | T:0.325     |
| chr28                                      | 11557492 | 2 | 40 | C:0.475                | T:0.525     |
| chr28                                      | 11558629 | 2 | 40 | G:0.525                | A:0.475     |
| chr28                                      | 11558708 | 3 | 38 | TAA:0.210526           | T:0.473684  |
| TA:0.315789                                |          |   |    |                        |             |
| chr28                                      | 11558881 | 2 | 40 | T:0.5                  | C:0.5       |
| chr28                                      | 11558998 | 2 | 40 | C:1                    | A:0         |
| chr28                                      | 11559044 | 2 | 38 | T:0.973684             | C:0.0263158 |
| chr28                                      | 11559049 | 2 | 36 | A:1                    | G:0         |
| chr28                                      | 11559113 | 2 | 36 | C:0.972222             | T:0.0277778 |
| chr28                                      | 11559336 | 2 | 38 | G:0.973684             | A:0.0263158 |
| chr28                                      | 11559370 | 2 | 38 | G:0.526316             | A:0.473684  |
| chr28                                      | 11559660 | 2 | 36 | G:0.583333             | A:0.416667  |
| chr28                                      | 11559680 | 2 | 36 | C:1                    | A:0         |
| chr28                                      | 11559789 | 2 | 40 | G:0.975                | A:0.025     |
| chr28                                      | 11560380 | 2 | 34 | G:1                    | GAA:0       |
| chr28                                      | 11560678 | 2 | 40 | T:0.975                | C:0.025     |
| chr28                                      | 11560738 | 2 | 38 | C:0.947368             | T:0.0526316 |
| chr28                                      | 11560775 | 2 | 38 | G:0.973684             | A:0.0263158 |
| chr28                                      | 11560960 | 2 | 38 | ACAGGGTGACTTG:0.684211 | A:          |
| 0.315789                                   |          |   |    |                        |             |
| chr28                                      | 11561034 | 2 | 38 | T:0.657895             | C:0.342105  |
| chr28                                      | 11561179 | 2 | 36 | A:1                    | G:0         |
| chr28                                      | 11561313 | 2 | 40 | A:0.975                |             |
| ATTTGTGTTGTGTTGTGTTGTATGTCCTTTATATGG:0.025 |          |   |    |                        |             |
| chr28                                      | 11561358 | 2 | 34 | T:0.617647             | C:0.382353  |
| chr28                                      | 11561433 | 2 | 40 | G:1                    | A:0         |
| chr28                                      | 11561807 | 2 | 38 | C:1                    | T:0         |
| chr28                                      | 11562183 | 2 | 40 | C:1                    | T:0         |
| chr28                                      | 11562308 | 2 | 38 | A:0.131579             | T:0.868421  |
| chr28                                      | 11562402 | 2 | 40 | G:0.95                 | A:0.05      |
| chr28                                      | 11562430 | 2 | 40 | C:1                    | T:0         |
| chr28                                      | 11562453 | 2 | 40 | G:0.975                | A:0.025     |
| chr28                                      | 11562652 | 2 | 40 | C:1                    | T:0         |

|       |          |   |    |                |             |
|-------|----------|---|----|----------------|-------------|
| chr28 | 11562724 | 2 | 40 | T:0.175        | C:0.825     |
| chr28 | 11562746 | 2 | 40 | A:0.175        | G:0.825     |
| chr28 | 11562877 | 2 | 40 | A:0.975        | C:0.025     |
| chr28 | 11562957 | 2 | 38 | G:0.0526316    | A:0.947368  |
| chr28 | 11563024 | 2 | 36 | G:0.166667     | T:0.833333  |
| chr28 | 11563301 | 2 | 34 | T:0.117647     | C:0.882353  |
| chr28 | 11563332 | 2 | 38 | G:0.157895     | A:0.842105  |
| chr28 | 11563436 | 2 | 40 | T:0.1          | C:0.9       |
| chr28 | 11563631 | 2 | 40 | C:0.15         | T:0.85      |
| chr28 | 11564298 | 2 | 40 | C:0.125        | T:0.875     |
| chr28 | 11564438 | 2 | 40 | G:0.125        | GTC:0.875   |
| chr28 | 11564743 | 2 | 36 | T:0.138889     | C:0.861111  |
| chr28 | 11564765 | 2 | 36 | C:0.166667     | A:0.833333  |
| chr28 | 11564817 | 2 | 32 | T:0.03125      | C:0.96875   |
| chr28 | 11564942 | 2 | 32 | CTCTCT:0.34375 | C:0.65625   |
| chr28 | 11564975 | 2 | 34 | TA:0.205882    | T:0.794118  |
| chr28 | 11564976 | 2 | 30 | A:0.966667     | T:0.0333333 |
| chr28 | 11564977 | 2 | 34 | A:1            | T:0         |
| chr28 | 11564997 | 2 | 34 | T:0.205882     | C:0.794118  |
| chr28 | 11565006 | 2 | 32 | G:0.96875      | GA:0.03125  |
| chr28 | 11565038 | 2 | 38 | G:0.105263     | A:0.894737  |
| chr28 | 11565040 | 2 | 38 | TGTTA:0.973684 | T:0.0263158 |
| chr28 | 11565107 | 2 | 40 | A:0.175        | C:0.825     |
| chr28 | 11565280 | 2 | 40 | C:0.125        | A:0.875     |
| chr28 | 11565509 | 2 | 38 | G:1            | A:0         |
| chr28 | 11565518 | 2 | 38 | C:0.684211     | T:0.315789  |
| chr28 | 11565525 | 2 | 38 | C:1            | T:0         |
| chr28 | 11565938 | 2 | 40 | A:0.15         | T:0.85      |
| chr28 | 11566480 | 2 | 36 | C:0.138889     | A:0.861111  |
| chr28 | 11566746 | 2 | 40 | A:1            | G:0         |
| chr28 | 11567133 | 2 | 40 | A:0.1          | G:0.9       |
| chr28 | 11567398 | 2 | 40 | C:0.125        | G:0.875     |
| chr28 | 11567410 | 2 | 40 | T:0.125        | A:0.875     |
| chr28 | 11567464 | 2 | 38 | G:0.131579     | C:0.868421  |
| chr28 | 11567663 | 2 | 40 | A:1            | G:0         |
| chr28 | 11567932 | 2 | 40 | A:0.125        | G:0.875     |
| chr28 | 11568038 | 2 | 40 | T:0.125        | C:0.875     |
| chr28 | 11568052 | 2 | 40 | T:0.15         | C:0.85      |
| chr28 | 11568086 | 2 | 38 | T:0.105263     | C:0.894737  |
| chr28 | 11568578 | 2 | 36 | T:0.0833333    | C:0.916667  |
| chr28 | 11568998 | 2 | 38 | C:0.947368     | A:0.0526316 |
| chr28 | 11569485 | 2 | 32 | A:1            | AC:0        |
| chr28 | 11569547 | 2 | 36 | G:0.111111     | A:0.888889  |
| chr28 | 11569937 | 2 | 36 | G:1            | A:0         |
| chr28 | 11570207 | 2 | 40 | G:0.125        | GA:0.875    |
| chr28 | 11570420 | 2 | 40 | T:0.15         | C:0.85      |
| chr28 | 11570482 | 2 | 38 | TC:0.973684    | T:0.0263158 |
| chr28 | 11571261 | 2 | 40 | A:0.4          | T:0.6       |
| chr28 | 11571394 | 2 | 38 | G:0.736842     | C:0.263158  |
| chr28 | 11571395 | 2 | 38 | G:0.736842     | T:0.263158  |
| chr28 | 11571515 | 2 | 36 | C:0            | CT:1        |
| chr28 | 11571579 | 2 | 38 | C:0            | A:1         |
| chr28 | 11571582 | 2 | 38 | T:0            | A:1         |
| chr28 | 11571583 | 2 | 38 | G:0            | A:1         |

|       |          |   |    |                                  |                   |              |                        |
|-------|----------|---|----|----------------------------------|-------------------|--------------|------------------------|
| chr28 | 11571586 | 2 | 38 | G:0                              | A:1               |              |                        |
| chr28 | 11571687 | 2 | 36 | C:0.972222                       |                   | T:0.0277778  |                        |
| chr28 | 11571773 | 2 | 30 | CCA:0.8                          | C:0.2             |              |                        |
| chr28 | 11571812 | 2 | 30 | T:0.866667                       |                   | G:0.133333   |                        |
| chr28 | 11572221 | 2 | 12 | A:0.833333                       |                   | G:0.166667   |                        |
| chr28 | 11572368 | 2 | 28 | G:0.964286                       |                   | T:0.0357143  |                        |
| chr28 | 11572559 | 2 | 34 | T:0.735294                       |                   | C:0.264706   |                        |
| chr28 | 11572602 | 2 | 32 | A:0.875                          | T:0.125           |              |                        |
| chr28 | 11572697 | 2 | 30 | G:0.833333                       |                   | A:0.166667   |                        |
| chr28 | 11572722 | 2 | 34 | G:0.970588                       |                   | A:0.0294118  |                        |
| chr28 | 11572829 | 2 | 24 | A:0.375                          | T:0.625           |              |                        |
| chr28 | 11573250 | 2 | 36 | T:0.75                           | C:0.25            |              |                        |
| chr28 | 11573328 | 2 | 34 | G:1                              | A:0               |              |                        |
| chr28 | 11573350 | 2 | 40 | A:0                              | T:1               |              |                        |
| chr28 | 11573351 | 2 | 40 | A:0                              | T:1               |              |                        |
| chr28 | 11573352 | 2 | 40 | A:0                              | T:1               |              |                        |
| chr28 | 11573392 | 2 | 40 | A:0                              | AT:1              |              |                        |
| chr28 | 11573397 | 2 | 40 | A:0                              | AT:1              |              |                        |
| chr28 | 11573680 | 2 | 38 | T:0.763158                       |                   | C:0.236842   |                        |
| chr28 | 11573861 | 2 | 38 | A:0.815789                       |                   | G:0.184211   |                        |
| chr28 | 11573910 | 2 | 38 | A:0.710526                       |                   | G:0.289474   |                        |
| chr28 | 11573959 | 2 | 40 | A:1                              | C:0               |              |                        |
| chr28 | 11574101 | 2 | 40 | TTTTCTTTCTTTC:0.675              |                   | T:0.325      |                        |
| chr28 | 11574186 | 4 | 40 | CTTCCTTTCCTTTCCTTTCCTTTCCTTTCCT: |                   |              |                        |
| 0.175 |          |   |    | C:0.475                          | CTTCCTTTCCT:0.175 |              | CTTCCTTTCCTTTCCTTTCCT: |
| 0.175 |          |   |    |                                  |                   |              |                        |
| chr28 | 11574601 | 2 | 40 | C:0.2                            | CAAAT:0.8         |              |                        |
| chr28 | 11574693 | 2 | 38 | T:0.394737                       |                   | G:0.605263   |                        |
| chr28 | 11574809 | 2 | 34 | C:0.323529                       |                   | CT:0.676471  |                        |
| chr28 | 11574818 | 2 | 36 | A:0.527778                       |                   | T:0.472222   |                        |
| chr28 | 11575729 | 2 | 38 | AG:0.868421                      |                   | A:0.131579   |                        |
| chr28 | 11576021 | 2 | 40 | G:1                              | A:0               |              |                        |
| chr28 | 11576230 | 2 | 40 | A:0.225                          | T:0.775           |              |                        |
| chr28 | 11576419 | 2 | 40 | T:0.2                            | TG:0.8            |              |                        |
| chr28 | 11576643 | 2 | 40 | CAAACAA:0.8                      |                   | C:0.2        |                        |
| chr28 | 11576716 | 2 | 40 | GTA:0.175                        |                   | G:0.825      |                        |
| chr28 | 11576738 | 2 | 40 | T:0.95                           | A:0.05            |              |                        |
| chr28 | 11576853 | 2 | 40 | G:0.175                          | C:0.825           |              |                        |
| chr28 | 11576869 | 2 | 40 | C:0.95                           | T:0.05            |              |                        |
| chr28 | 11577188 | 2 | 30 | CCT:0.3                          | C:0.7             |              |                        |
| chr28 | 11577216 | 2 | 32 | A:0.65625                        |                   | AT:0.34375   |                        |
| chr28 | 11577346 | 2 | 38 | G:0.157895                       |                   | A:0.842105   |                        |
| chr28 | 11577432 | 2 | 40 | G:0.95                           | A:0.05            |              |                        |
| chr28 | 11577541 | 2 | 40 | C:0.925                          | T:0.075           |              |                        |
| chr28 | 11577594 | 2 | 40 | A:1                              | G:0               |              |                        |
| chr28 | 11577789 | 2 | 40 | C:0.25                           | A:0.75            |              |                        |
| chr28 | 11577927 | 2 | 38 | T:0.157895                       |                   | TAA:0.842105 |                        |
| chr28 | 11577973 | 2 | 38 | T:0.184211                       |                   | C:0.815789   |                        |
| chr28 | 11578112 | 2 | 36 | C:0.111111                       |                   | T:0.888889   |                        |
| chr28 | 11578215 | 2 | 38 | A:0.184211                       |                   | C:0.815789   |                        |
| chr28 | 11578269 | 2 | 12 | C:0.5                            | A:0.5             |              |                        |
| chr28 | 11578484 | 2 | 30 | G:0.933333                       |                   | A:0.0666667  |                        |
| chr28 | 11578533 | 2 | 36 | C:0.833333                       |                   | T:0.166667   |                        |
| chr28 | 11578564 | 2 | 38 | C:0.157895                       |                   | A:0.842105   |                        |



|              |            |    |                   |            |
|--------------|------------|----|-------------------|------------|
| chr28        | 11578718 2 | 38 | C:0.289474        | T:0.710526 |
| chr28        | 11578778 2 | 40 | TAC:0.425         | T:0.575    |
| chr28        | 11578794 2 | 40 | G:0.2 A:0.8       |            |
| chr28        | 11578798 2 | 40 | A:0.75 ATG:0.25   |            |
| chr28        | 11578865 2 | 40 | A:0.45 T:0.55     |            |
| chr28        | 11578932 2 | 40 | A:0.225 G:0.775   |            |
| chr28        | 11578956 2 | 38 | C:0.736842        | A:0.263158 |
| chr28        | 11579440 2 | 38 | G:0.157895        | A:0.842105 |
| chr28        | 11579558 2 | 40 | T:0.15 C:0.85     |            |
| chr28        | 11580025 2 | 38 | G:1 A:0           |            |
| chr28        | 11580346 2 | 40 | C:0.15 T:0.85     |            |
| chr28        | 11580885 2 | 40 | G:0.175 T:0.825   |            |
| chr28        | 11581125 2 | 36 | G:0.722222        | A:0.277778 |
| chr28        | 11581162 2 | 36 | G:1 A:0           |            |
| chr28        | 11581232 2 | 34 | G:0.735294        | A:0.264706 |
| chr28        | 11581388 2 | 40 | T:0.2 G:0.8       |            |
| chr28        | 11581861 2 | 34 | G:0.176471        | A:0.823529 |
| chr28        | 11581981 2 | 40 | T:0.775 C:0.225   |            |
| chr28        | 11582049 2 | 40 | T:0.725 A:0.275   |            |
| chr28        | 11582340 2 | 38 | G:0.736842        | A:0.263158 |
| chr28        | 11582811 2 | 32 | C:0.8125 T:0.1875 |            |
| chr28        | 11582964 2 | 40 | A:1 C:0           |            |
| chr28        | 11583458 2 | 40 | AC:0.65 A:0.35    |            |
| chr28        | 11583596 2 | 36 | C:0.416667        | T:0.583333 |
| chr28        | 11583717 2 | 38 | C:0.210526        | A:0.789474 |
| chr28        | 11583875 2 | 38 | G:0.815789        | A:0.184211 |
| chr28        | 11583892 2 | 36 | G:0.166667        | A:0.833333 |
| chr28        | 11584035 2 | 38 | T:1 C:0           |            |
| chr28        | 11584058 2 | 36 | T:1 G:0           |            |
| chr28        | 11584794 2 | 36 | CT:0.833333       | C:0.166667 |
| chr28        | 11585232 2 | 40 | A:0.8 G:0.2       |            |
| chr28        | 11585430 2 | 36 | A:0.472222        | G:0.527778 |
| chr28        | 11585454 2 | 38 | G:1 C:0           |            |
| chr28        | 11585532 2 | 38 | A:1 C:0           |            |
| chr28        | 11585712 2 | 34 | C:0.323529        | T:0.676471 |
| chr28        | 11585736 2 | 36 | G:1 A:0           |            |
| chr28        | 11587009 2 | 38 | C:0.868421        | T:0.131579 |
| chr28        | 11587232 2 | 34 | TGA:0.147059      | T:0.852941 |
| chr28        | 11587312 2 | 36 | G:0.361111        | A:0.638889 |
| chr28        | 11587332 2 | 36 | G:1 A:0           |            |
| chr28        | 11587641 2 | 38 | G:1 A:0           |            |
| chr28        | 11587651 2 | 38 | A:0.473684        | G:0.526316 |
| chr28        | 11588148 2 | 38 | A:0.368421        | G:0.631579 |
| chr28        | 11588471 3 | 38 | CT:0.657895       | C:0.131579 |
| CTT:0.210526 |            |    |                   |            |
| chr28        | 11588601 2 | 36 | T:0.166667        | C:0.833333 |
| chr28        | 11588763 2 | 40 | C:1 T:0           |            |
| chr28        | 11589217 2 | 38 | C:0.473684        | T:0.526316 |
| chr28        | 11589258 2 | 40 | T:0.75 C:0.25     |            |
| chr28        | 11589596 2 | 36 | G:1 A:0           |            |
| chr28        | 11589598 2 | 36 | C:0.416667        | T:0.583333 |
| chr28        | 11590069 2 | 32 | T:0.9375 C:0.0625 |            |
| chr28        | 11590104 2 | 32 | C:1 T:0           |            |
| chr28        | 11590299 2 | 38 | C:0.473684        | A:0.526316 |

|       |              |    |                       |                |           |
|-------|--------------|----|-----------------------|----------------|-----------|
| chr28 | 11590481 2   | 38 | A:0.947368            | G:0.0526316    |           |
| chr28 | 11590817 2   | 36 | G:0.166667            | A:0.833333     |           |
| chr28 | 11590925 2   | 38 | T:0.236842            | C:0.763158     |           |
| chr28 | 11591042 2   | 36 | T:0.944444            | C:0.0555556    |           |
| chr28 | 11591043 2   | 36 | G:0.944444            | T:0.0555556    |           |
| chr28 | 11591057 2   | 34 | A:0.941176            | T:0.0588235    |           |
| chr28 | 11591069 2   | 36 | T:0.916667            | C:0.0833333    |           |
| chr28 | 11591173 2   | 40 | G:1                   | A:0            |           |
| chr28 | 11591421 2   | 38 | T:1                   | TG:0           |           |
| chr28 | 11591717 2   | 38 | C:1                   | T:0            |           |
| chr28 | 11591970 2   | 38 | G:0.473684            | T:0.526316     |           |
| chr28 | 11592040 2   | 38 | T:0.5                 | G:0.5          |           |
| chr28 | 11592531 2   | 38 | A:1                   | G:0            |           |
| chr28 | 11592748 2   | 38 | T:1                   | G:0            |           |
| chr28 | 11592995 2   | 38 | G:1                   | C:0            |           |
| chr28 | 11593095 2   | 20 | A:0.6                 | G:0.4          |           |
| chr28 | 11593209 2   | 8  | G:0.875               | A:0.125        |           |
| chr28 | 11593286 2   | 26 | GTGCGGC:0.307692      | G:0.692308     |           |
| chr28 | 11593315 2   | 30 | CGGGCCA:1             | C:0            |           |
| chr28 | 11593329 2   | 32 | GGCCAGGGCCAGC:0.53125 | G:<br>0.46875  |           |
| chr28 | 11593513 2   | 32 | C:0.15625             | CG:0.84375     |           |
| chr28 | 11593558 2   | 32 | C:0.4375              | T:0.5625       |           |
| chr28 | 11594256 2   | 40 | C:1                   | CCCCT:0        |           |
| chr28 | 11594264 2   | 40 | T:0.2                 | TC:0.8         |           |
| chr28 | 11594265 3   | 40 | T:0.2                 | TC:0.15        | TCTC:0.65 |
| chr28 | 11594286 2   | 38 | AT:0.921053           | A:0.0789474    |           |
| chr28 | 11594291 2   | 38 | T:0.868421            | A:0.131579     |           |
| chr28 | 11594296 2   | 38 | T:0.921053            | A:0.0789474    |           |
| chr28 | 11594297 4   | 38 | TA:0.315789           | T:0.552632     |           |
| AA:0  | TAA:0.131579 |    |                       |                |           |
| chr28 | 11594331 2   | 38 | C:1                   | T:0            |           |
| chr28 | 11594374 2   | 38 | G:0.921053            | A:0.0789474    |           |
| chr28 | 11594483 2   | 40 | T:0.4                 | G:0.6          |           |
| chr28 | 11594670 2   | 40 | G:0.55                | T:0.45         |           |
| chr28 | 11594671 2   | 40 | T:0.55                | C:0.45         |           |
| chr28 | 11594796 2   | 40 | A:0.675               | G:0.325        |           |
| chr28 | 11594872 2   | 40 | C:0.925               | T:0.075        |           |
| chr28 | 11594893 2   | 38 | C:0.736842            | CAGAA:0.263158 |           |
| chr28 | 11595014 2   | 40 | A:0.675               | G:0.325        |           |
| chr28 | 11595259 2   | 40 | A:0.725               | T:0.275        |           |
| chr28 | 11595360 2   | 38 | C:0.789474            | T:0.210526     |           |
| chr28 | 11595626 2   | 34 | C:0.676471            | T:0.323529     |           |
| chr28 | 11595862 2   | 36 | G:0.916667            | T:0.0833333    |           |
| chr28 | 11595870 2   | 36 | C:0.777778            | T:0.222222     |           |
| chr28 | 11595883 2   | 38 | T:0.789474            | C:0.210526     |           |
| chr28 | 11596094 2   | 36 | T:0.777778            | C:0.222222     |           |
| chr28 | 11596296 2   | 38 | G:1                   | A:0            |           |
| chr28 | 11596429 2   | 38 | T:0.184211            | C:0.815789     |           |
| chr28 | 11596526 2   | 38 | A:0.789474            | G:0.210526     |           |
| chr28 | 11596568 2   | 36 | T:0.75                | A:0.25         |           |
| chr28 | 11596570 2   | 36 | C:1                   | T:0            |           |
| chr28 | 11596721 2   | 36 | G:0.388889            | C:0.611111     |           |
| chr28 | 11596765 3   | 38 | GTT:0.394737          | G:0.473684     |           |

GT:0.131579  
 chr28 11596776 2 38 TTTTTTG:0.526316 T:0.473684  
 chr28 11596779 2 38 TTTG:1 T:0  
 chr28 11596782 2 38 G:0.763158 T:0.236842  
 chr28 11596785 2 38 T:0.763158 G:0.236842  
 chr28 11596787 2 38 T:0.868421 G:0.131579  
 chr28 11596788 2 38 TG:0.868421 T:0.131579  
 chr28 11596789 3 38 GTT:0.315789 G:0.473684  
 TTT:0.210526  
 chr28 11596794 2 38 T:1 TG:0  
 chr28 11596927 2 38 T:0.921053 A:0.0789474  
 chr28 11597021 3 36 C:0.277778 CT:0.666667  
 CTT:0.0555556  
 chr28 11597352 2 38 C:0.921053 T:0.0789474  
 chr28 11597367 2 36 G:0.416667 T:0.583333  
 chr28 11597372 2 38 G:0.921053 A:0.0789474  
 chr28 11597823 2 36 C:0.75 T:0.25  
 chr28 11598185 4 40 CT:0.6 C:0.125 CTT:0.2 CTTT:  
 0.075  
 chr28 11598207 2 40 A:0.925 T:0.075  
 chr28 11598277 2 38 G:0.447368 A:0.552632  
 chr28 11598278 2 38 A:0.447368 T:0.552632  
 chr28 11598332 2 40 G:0.425 GGAT:0.575  
 chr28 11598335 2 40 C:0.425 T:0.575  
 chr28 11598396 2 38 C:0.578947 CT:0.421053  
 chr28 11598404 2 38 C:0.157895 T:0.842105  
 chr28 11598484 2 40 G:0.55 T:0.45  
 chr28 11598559 2 38 A:1 G:0  
 chr28 11598737 2 40 C:0.95 CA:0.05  
 chr28 11598800 4 38 CTT:0.210526 C:0.526316  
 CT:0.184211 CTTT:0.0789474  
 chr28 11598860 2 38 C:0.184211 T:0.815789  
 chr28 11599091 2 40 T:0.9 G:0.1  
 chr28 11599188 2 36 C:1 A:0  
 chr28 11599223 2 36 A:0.916667 C:0.0833333  
 chr28 11599278 2 40 A:0.975 C:0.025  
 chr28 11599456 2 38 T:0.157895 C:0.842105  
 chr28 11599457 2 38 G:0.5 A:0.5  
 chr28 11599776 2 40 T:1 G:0  
 chr28 11599802 2 38 T:0.763158 A:0.236842  
 chr28 11599821 2 38 T:1 A:0  
 chr28 11599924 2 38 G:0.815789 A:0.184211  
 chr28 11600197 2 40 GA:0.775 G:0.225  
 chr28 11600932 2 40 T:0.75 A:0.25  
 chr28 11601773 2 40 A:1 C:0  
 chr28 11601810 2 40 G:0.425 A:0.575  
 chr28 11601818 2 40 C:1 T:0  
 chr28 11601898 2 34 C:0.970588 G:0.0294118  
 chr28 11602097 2 40 C:0.3 A:0.7  
 chr28 11602103 2 38 T:0.842105 G:0.157895  
 chr28 11602416 2 40 T:0.925 C:0.075  
 chr28 11602515 2 40 T:0.925 C:0.075  
 chr28 11602545 2 40 A:0.2 C:0.8  
 chr28 11602891 2 40 C:0.9 T:0.1

|       |                         |    |                             |         |             |
|-------|-------------------------|----|-----------------------------|---------|-------------|
| chr28 | 11603063 2              | 36 | T:1                         | G:0     |             |
| chr28 | 11604252 2              | 38 | T:0.394737                  |         | C:0.605263  |
| chr28 | 11604357 2              | 38 | A:0.921053                  |         | T:0.0789474 |
| chr28 | 11604378 4              | 38 | TGAGAGAGAGA:0.210526        |         | T:          |
|       | 0.394737 TGAGA:0.236842 |    | TGAGAGAGA:0.157895          |         |             |
| chr28 | 11604394 2              | 38 | AG:0.921053                 |         | A:0.0789474 |
| chr28 | 11604396 2              | 38 | AGAGAGAG:0.921053           |         | A:          |
|       | 0.0789474               |    |                             |         |             |
| chr28 | 11604458 2              | 34 | C:0.352941                  |         | G:0.647059  |
| chr28 | 11604478 2              | 36 | TG:0.5                      | T:0.5   |             |
| chr28 | 11604541 2              | 36 | A:0.777778                  |         | T:0.222222  |
| chr28 | 11604741 2              | 38 | C:0.921053                  |         | A:0.0789474 |
| chr28 | 11604757 2              | 40 | ATGAAGAAATGGAGACTGTTT:0.575 |         |             |
|       | A:0.425                 |    |                             |         |             |
| chr28 | 11604949 2              | 36 | A:0.388889                  |         | G:0.611111  |
| chr28 | 11604955 2              | 36 | A:1                         | G:0     |             |
| chr28 | 11605172 2              | 38 | T:0.921053                  |         | G:0.0789474 |
| chr28 | 11605576 2              | 40 | C:0.925                     | T:0.075 |             |
| chr28 | 11605909 2              | 34 | C:1                         | T:0     |             |
| chr28 | 11606073 2              | 34 | A:0.823529                  |         | G:0.176471  |
| chr28 | 11606519 2              | 34 | A:0.941176                  |         | G:0.0588235 |
| chr28 | 11606879 2              | 38 | CA:1                        | C:0     |             |
| chr28 | 11606945 2              | 38 | T:0.815789                  |         | A:0.184211  |
| chr28 | 11607011 2              | 38 | A:1                         | G:0     |             |
| chr28 | 11607897 2              | 40 | C:0.6                       | T:0.4   |             |
| chr28 | 11608033 2              | 36 | G:0.75                      | A:0.25  |             |
| chr28 | 11608180 3              | 40 | TAAACAAAC:0.575             | T:0.1   | TAAAC:      |
|       | 0.325                   |    |                             |         |             |
| chr28 | 11608898 2              | 40 | A:0.625                     | G:0.375 |             |
| chr28 | 11608945 2              | 40 | G:0.675                     | C:0.325 |             |
| chr28 | 11609061 2              | 36 | T:0.694444                  |         | C:0.305556  |
| chr28 | 11609073 2              | 36 | A:0.583333                  |         | T:0.416667  |
| chr28 | 11609146 2              | 40 | T:0.675                     | C:0.325 |             |
| chr28 | 11609265 2              | 36 | T:0.694444                  |         | C:0.305556  |
| chr28 | 11609484 2              | 32 | C:1                         | T:0     |             |
| chr28 | 11609564 2              | 30 | G:0.9                       | A:0.1   |             |
| chr28 | 11609578 2              | 30 | C:1                         | T:0     |             |
| chr28 | 11609722 2              | 36 | T:0.805556                  |         | G:0.194444  |
| chr28 | 11609723 2              | 36 | A:0.694444                  |         | C:0.305556  |
| chr28 | 11609803 2              | 34 | A:0.970588                  |         | T:0.0294118 |
| chr28 | 11609990 2              | 36 | C:0.666667                  |         | A:0.333333  |
| chr28 | 11610409 2              | 38 | G:0.789474                  |         | A:0.210526  |
| chr28 | 11610793 2              | 36 | TCAG:0.916667               |         | T:0.0833333 |
| chr28 | 11611072 2              | 40 | T:0.75                      | C:0.25  |             |
| chr28 | 11611102 2              | 36 | T:0.75                      | C:0.25  |             |
| chr28 | 11611344 2              | 38 | T:0.973684                  |         | C:0.0263158 |
| chr28 | 11611618 2              | 38 | C:0.684211                  |         | G:0.315789  |
| chr28 | 11611687 2              | 40 | C:0.7                       | T:0.3   |             |
| chr28 | 11611791 2              | 40 | G:1                         | A:0     |             |
| chr28 | 11611845 2              | 40 | A:0.675                     | T:0.325 |             |
| chr28 | 11611994 2              | 40 | G:1                         | A:0     |             |
| chr28 | 11612122 2              | 38 | T:0.631579                  |         | C:0.368421  |
| chr28 | 11612128 2              | 38 | A:0.763158                  |         | C:0.236842  |
| chr28 | 11612184 2              | 38 | G:0.973684                  |         | A:0.0263158 |

|       |                                        |    |                   |              |
|-------|----------------------------------------|----|-------------------|--------------|
| chr28 | 11612734 2                             | 38 | C:0.763158        | T:0.236842   |
| chr28 | 11612749 2                             | 40 | G:0.825 C:0.175   |              |
| chr28 | 11613175 2                             | 40 | G:0.75 A:0.25     |              |
| chr28 | 11613346 2                             | 40 | C:0.975 T:0.025   |              |
| chr28 | 11613350 2                             | 40 | G:0.975 T:0.025   |              |
| chr28 | 11613641 2                             | 40 | C:1 A:0           |              |
| chr28 | 11613768 2                             | 38 | C:1 T:0           |              |
| chr28 | 11613900 2                             | 40 | G:0.95 A:0.05     |              |
| chr28 | 11614047 2                             | 40 | T:0.95 C:0.05     |              |
| chr28 | 11614242 2                             | 32 | G:0.5625 A:0.4375 |              |
| chr28 | 11614331 2                             | 36 | C:1 T:0           |              |
| chr28 | 11614549 2                             | 40 | C:0.85 T:0.15     |              |
| chr28 | 11614894 2                             | 36 | A:0.972222        | G:0.0277778  |
| chr28 | 11615171 2                             | 40 | G:0.975 T:0.025   |              |
| chr28 | 11615352 2                             | 38 | T:0.973684        | TA:0.0263158 |
| chr28 | 11615568 2                             | 40 | C:0.95 A:0.05     |              |
| chr28 | 11615826 2                             | 40 | G:0.975 A:0.025   |              |
| chr28 | 11615868 2                             | 40 | CTA:1 C:0         |              |
| chr28 | 11615952 2                             | 40 | ATTTTT:0.8        | A:0.2        |
| chr28 | 11615953 2                             | 38 |                   |              |
|       | TTTTTTTTTTTTTTTTTTTTTTTTTTTGGTATTTGAA: |    | 0.973684          | T:0.0263158  |
| chr28 | 11616070 2                             | 36 | C:0.888889        | CT:0.111111  |
| chr28 | 11616117 2                             | 36 | CT:0.916667       | C:0.0833333  |
| chr28 | 11616268 2                             | 40 | C:0.9 A:0.1       |              |
| chr28 | 11616320 2                             | 38 | G:0.894737        | T:0.105263   |
| chr28 | 11616406 2                             | 40 | GTA:1 G:0         |              |
| chr28 | 11616536 2                             | 38 | CA:0.921053       | C:0.0789474  |
| chr28 | 11616567 2                             | 40 | TC:0.925 T:0.075  |              |
| chr28 | 11616568 2                             | 40 | C:0.95 CT:0.05    |              |
| chr28 | 11616613 2                             | 38 | A:1 C:0           |              |
| chr28 | 11616697 2                             | 40 | G:0.15 A:0.85     |              |
| chr28 | 11616963 2                             | 40 | G:0.7 C:0.3       |              |
| chr28 | 11617017 2                             | 36 | T:0.861111        | C:0.138889   |
| chr28 | 11617076 2                             | 40 | T:0.9 G:0.1       |              |
| chr28 | 11617079 2                             | 40 | C:0.975 T:0.025   |              |
| chr28 | 11617455 2                             | 40 | G:0.95 A:0.05     |              |
| chr28 | 11617492 2                             | 38 | T:0.657895        | C:0.342105   |
| chr28 | 11617795 2                             | 38 | A:0.947368        | G:0.0526316  |
| chr28 | 11618216 2                             | 40 | AT:1 A:0          |              |
| chr28 | 11618267 2                             | 38 | T:0.736842        | C:0.263158   |
| chr28 | 11618315 2                             | 40 | G:0.975 A:0.025   |              |
| chr28 | 11618439 2                             | 40 | T:0.925 C:0.075   |              |
| chr28 | 11618928 2                             | 38 | GT:0.973684       | G:0.0263158  |
| chr28 | 11618960 2                             | 40 | C:0.9 A:0.1       |              |
| chr28 | 11619029 2                             | 38 | T:0.605263        | TG:0.394737  |
| chr28 | 11619034 2                             | 38 | C:0.894737        | T:0.105263   |
| chr28 | 11619208 2                             | 38 | G:0.894737        | C:0.105263   |
| chr28 | 11619407 2                             | 38 | A:1 T:0           |              |
| chr28 | 11619418 2                             | 38 | A:0.868421        | G:0.131579   |
| chr28 | 11619623 2                             | 40 | G:0.925 T:0.075   |              |
| chr28 | 11619624 2                             | 40 | A:0.5 T:0.5       |              |
| chr28 | 11619667 2                             | 38 | C:0.894737        | T:0.105263   |
| chr28 | 11619802 2                             | 38 | T:0.868421        | A:0.131579   |
| chr28 | 11619807 2                             | 38 | G:0.868421        | T:0.131579   |

|              |          |   |    |                     |                                    |
|--------------|----------|---|----|---------------------|------------------------------------|
| chr28        | 11620066 | 2 | 38 | G:0.947368          | A:0.0526316                        |
| chr28        | 11620197 | 2 | 40 | G:1 A:0             |                                    |
| chr28        | 11620293 | 2 | 40 | TG:0.625 T:0.375    |                                    |
| chr28        | 11620360 | 2 | 38 | C:0.921053          | T:0.0789474                        |
| chr28        | 11620596 | 2 | 38 | G:0.894737          | A:0.105263                         |
| chr28        | 11620674 | 2 | 38 | G:1 A:0             |                                    |
| chr28        | 11620751 | 2 | 40 | A:0.95 G:0.05       |                                    |
| chr28        | 11620765 | 2 | 40 | C:0.975 T:0.025     |                                    |
| chr28        | 11620843 | 2 | 40 | A:1 G:0             |                                    |
| chr28        | 11620896 | 2 | 38 | A:0.973684          | C:0.0263158                        |
| chr28        | 11621240 | 2 | 40 | A:0.75 T:0.25       |                                    |
| chr28        | 11621573 | 2 | 40 | G:0.925 A:0.075     |                                    |
| chr28        | 11621624 | 2 | 40 | G:0.925 A:0.075     |                                    |
| chr28        | 11621742 | 2 | 40 | A:0.675 G:0.325     |                                    |
| chr28        | 11621773 | 2 | 40 | T:0.975 C:0.025     |                                    |
| chr28        | 11621848 | 2 | 38 | G:0.894737          | A:0.105263                         |
| chr28        | 11622244 | 2 | 38 | T:0.657895          | A:0.342105                         |
| chr28        | 11623106 | 2 | 40 | A:0.775 AATTT:0.225 |                                    |
| chr28        | 11623164 | 2 | 40 | C:0.725 T:0.275     |                                    |
| chr28        | 11623166 | 2 | 40 | C:0.725 T:0.275     |                                    |
| chr28        | 11623243 | 2 | 38 | T:0.631579          | G:0.368421                         |
| chr28        | 11623314 | 2 | 40 | G:0.825 A:0.175     |                                    |
| chr28        | 11623361 | 2 | 38 | C:0.763158          | T:0.236842                         |
| chr28        | 11623373 | 2 | 38 | T:0.684211          | C:0.315789                         |
| chr28        | 11623385 | 2 | 40 | G:0.925 T:0.075     |                                    |
| chr28        | 11623406 | 2 | 38 | C:0.684211          | T:0.315789                         |
| chr28        | 11623440 | 2 | 38 | T:1 C:0             |                                    |
| chr28        | 11623894 | 2 | 40 | C:1 T:0             |                                    |
| chr28        | 11624156 | 2 | 38 | C:1 T:0             |                                    |
| chr28        | 11624224 | 2 | 40 | T:0.925 C:0.075     |                                    |
| chr28        | 11624878 | 2 | 40 | A:0.95 T:0.05       |                                    |
| chr28        | 11625075 | 2 | 40 | C:0.65 T:0.35       |                                    |
| chr28        | 11625161 | 2 | 38 | C:0.631579          | T:0.368421                         |
| chr28        | 11625279 | 2 | 40 | T:0.725 C:0.275     |                                    |
| chr28        | 11625400 | 2 | 38 | GTCAC:0.921053      | G:0.0789474                        |
| chr28        | 11625617 | 2 | 40 | G:0.6 A:0.4         |                                    |
| chr28        | 11625771 | 2 | 40 | G:0.6 C:0.4         |                                    |
| chr28        | 11625905 | 3 | 38 | TC:0.605263         | T:0.315789                         |
| CC:0.0789474 |          |   |    |                     |                                    |
| chr28        | 11625915 | 2 | 38 | T:0.684211          | C:0.315789                         |
| chr28        | 11625962 | 2 | 38 | G:0.552632          | GTATT:0.447368                     |
| chr28        | 11626066 | 3 | 40 | CTGTGTG:0.525       | C:0.425 CTGTG:<br>0.05             |
| chr28        | 11626244 | 4 | 40 | CAG:0.475           | C:0.275 CAGAG:<br>0.2 CAGAGAG:0.05 |
| chr28        | 11626315 | 2 | 40 | G:0.825 A:0.175     |                                    |
| chr28        | 11626402 | 2 | 36 | A:0.666667          | G:0.333333                         |
| chr28        | 11626637 | 2 | 40 | C:0.65 T:0.35       |                                    |
| chr28        | 11627103 | 2 | 38 | C:0.921053          | T:0.0789474                        |
| chr28        | 11627334 | 2 | 40 | A:0.925 G:0.075     |                                    |
| chr28        | 11627622 | 2 | 40 | TTC:1 T:0           |                                    |
| chr28        | 11627984 | 2 | 40 | T:0.975 G:0.025     |                                    |
| chr28        | 11628016 | 2 | 40 | A:0.925 T:0.075     |                                    |
| chr28        | 11628478 | 2 | 40 | A:0.675 G:0.325     |                                    |

|                                  |          |   |    |                               |                        |
|----------------------------------|----------|---|----|-------------------------------|------------------------|
| chr28                            | 11628656 | 2 | 36 | G:1                           | A:0                    |
| chr28                            | 11628658 | 2 | 36 | G:0.944444                    | A:0.0555556            |
| chr28                            | 11628696 | 2 | 40 | CTTTATCATATTCTTTATTCTCT:0.875 |                        |
| C:0.125                          |          |   |    |                               |                        |
| chr28                            | 11628917 | 2 | 40 | T:0.975                       | A:0.025                |
| chr28                            | 11629114 | 2 | 38 | CTTTTTT:0.894737 C:0.105263   |                        |
| chr28                            | 11629359 | 2 | 40 | A:0.925                       | G:0.075                |
| chr28                            | 11629750 | 2 | 38 | T:0.973684                    | C:0.0263158            |
| chr28                            | 11629885 | 2 | 40 | G:0.975                       | A:0.025                |
| chr28                            | 11629911 | 2 | 38 | T:0.973684                    | C:0.0263158            |
| chr28                            | 11629947 | 2 | 40 | C:1                           | T:0                    |
| chr28                            | 11630066 | 2 | 38 | T:0.973684                    | G:0.0263158            |
| chr28                            | 11630218 | 2 | 40 | T:0.975                       | C:0.025                |
| chr28                            | 11630386 | 2 | 40 | A:0.6                         | C:0.4                  |
| chr28                            | 11630569 | 2 | 38 | A:0.842105                    | G:0.157895             |
| chr28                            | 11630669 | 2 | 38 | G:0.605263                    | A:0.394737             |
| chr28                            | 11630972 | 2 | 40 | C:0.7                         | T:0.3                  |
| chr28                            | 11631002 | 2 | 40 | C:0.75                        | G:0.25                 |
| chr28                            | 11631112 | 2 | 40 | G:0.975                       | A:0.025                |
| chr28                            | 11631274 | 2 | 40 | C:0.675                       | T:0.325                |
| chr28                            | 11631806 | 2 | 38 | AT:0.657895                   | A:0.342105             |
| chr28                            | 11631807 | 2 | 38 | T:0.894737                    | A:0.105263             |
| chr28                            | 11631961 | 2 | 36 | AC:0.694444                   | A:0.305556             |
| chr28                            | 11631997 | 2 | 36 | G:0.916667                    | T:0.0833333            |
| chr28                            | 11632048 | 2 | 40 | G:0.65                        | A:0.35                 |
| chr28                            | 11632389 | 2 | 40 | A:0.525                       | G:0.475                |
| chr28                            | 11632448 | 2 | 40 | C:0.925                       | G:0.075                |
| chr28                            | 11633018 | 2 | 40 | CA:0.6                        | C:0.4                  |
| chr28                            | 11633136 | 2 | 34 | T:0.558824                    | TC:0.441176            |
| chr28                            | 11633395 | 2 | 40 | C:1                           | T:0                    |
| chr28                            | 11633438 | 2 | 40 | T:0.925                       | C:0.075                |
| chr28                            | 11633629 | 2 | 38 | G:1                           | A:0                    |
| chr28                            | 11633883 | 2 | 38 | G:0.868421                    | A:0.131579             |
| chr28                            | 11634053 | 2 | 36 | T:0.555556                    | C:0.444444             |
| chr28                            | 11634287 | 2 | 36 | C:0.722222                    | T:0.277778             |
| chr28                            | 11634408 | 2 | 38 | TGTAA:1                       | T:0                    |
| chr28                            | 11634473 | 2 | 38 | C:0.789474                    | A:0.210526             |
| chr28                            | 11634938 | 2 | 40 | C:0.9                         | CTTA:0.1               |
| chr28                            | 11634941 | 2 | 40 | C:0.9                         | G:0.1                  |
| chr28                            | 11634943 | 2 | 40 | A:0.9                         | AGAACCTCT:0.1          |
| chr28                            | 11634945 | 2 | 40 | A:0.9                         | ATTGAAGAACC:0.1        |
| chr28                            | 11635125 | 2 | 40 | GC:0.925                      | G:0.075                |
| chr28                            | 11635128 | 2 | 40 | T:0.925                       | G:0.075                |
| chr28                            | 11635701 | 2 | 38 | A:0.631579                    | G:0.368421             |
| chr28                            | 11636000 | 2 | 32 | G:0.96875                     | A:0.03125              |
| chr28                            | 11636112 | 2 | 38 | T:0.736842                    | C:0.263158             |
| chr28                            | 11636162 | 3 | 38 | G:0.684211                    | GAATA:0                |
| GAATAAATA:0.315789               |          |   |    |                               |                        |
| chr28                            | 11636195 | 2 | 40 | A:0.975                       | AATACATAAATACATAAATAC: |
| 0.025                            |          |   |    |                               |                        |
| chr28                            | 11636202 | 2 | 40 | A:0.875                       | AC:0.125               |
| chr28                            | 11636203 | 6 | 40 | A:0.575                       | AAAAAAAAT:0            |
| AATAAAAAT:0.1 AATAAATAAAAAT:0.15 |          |   |    |                               |                        |
| AATACATAAATAAATAAATAAAAAT:0.05   |          |   |    |                               |                        |

ATAAATACATAAATACATAAATAAATAAATAAAAAT:0.125

|                                                                       |            |    |                           |            |                 |
|-----------------------------------------------------------------------|------------|----|---------------------------|------------|-----------------|
| chr28                                                                 | 11636449 2 | 40 | GCAA:1                    | G:0        |                 |
| chr28                                                                 | 11636450 3 | 40 | CA:0.675                  | C:0.075    | CAA:0.25        |
| chr28                                                                 | 11636585 2 | 40 | T:0.925                   | C:0.075    |                 |
| chr28                                                                 | 11636666 2 | 40 | A:0.925                   | C:0.075    |                 |
| chr28                                                                 | 11636699 2 | 40 | C:0.925                   | T:0.075    |                 |
| chr28                                                                 | 11637097 2 | 34 | C:1                       | T:0        |                 |
| chr28                                                                 | 11637148 2 | 32 | TTC:0.875                 |            | T:0.125         |
| chr28                                                                 | 11637876 2 | 38 | A:0.921053                |            | C:0.0789474     |
| chr28                                                                 | 11638360 2 | 38 | T:1                       | C:0        |                 |
| chr28                                                                 | 11638539 2 | 40 | T:1                       | C:0        |                 |
| chr28                                                                 | 11638683 2 | 40 | C:0.6                     | T:0.4      |                 |
| chr28                                                                 | 11638838 2 | 38 | T:0.894737                |            | G:0.105263      |
| chr28                                                                 | 11638897 2 | 38 | A:0.947368                |            | AGC:0.0526316   |
| chr28                                                                 | 11638902 3 | 38 | A:0.710526                |            | ACG:0.236842    |
| G:0.0526316                                                           |            |    |                           |            |                 |
| chr28                                                                 | 11638910 2 | 38 | G:0.894737                |            | GCGACA:0.105263 |
| chr28                                                                 | 11638912 2 | 38 | A:0.526316                |            | G:0.473684      |
| chr28                                                                 | 11639095 2 | 36 | C:0.944444                |            | T:0.0555556     |
| chr28                                                                 | 11639874 2 | 36 | C:0.972222                |            | A:0.0277778     |
| chr28                                                                 | 11640588 6 | 40 | CATCTATCTATCTATCTATCT:0.2 | C:0.1      |                 |
| CATCTATCTATCTATCT:0.375    CATCTATCTATCTATCTATCTATCT:0.325            |            |    |                           |            |                 |
| CATCTATCTATCTATCTATCTATCTATCT:0    CATCTATCTATCTATCTATCTATCTATCTATCT: |            |    |                           |            |                 |
| 0                                                                     |            |    |                           |            |                 |
| chr28                                                                 | 11640754 2 | 38 | A:0.131579                |            | C:0.868421      |
| chr28                                                                 | 11640794 2 | 40 | T:0.15                    | TTATC:0.85 |                 |
| chr28                                                                 | 11640807 2 | 40 | G:1                       | A:0        |                 |
| chr28                                                                 | 11640936 2 | 40 | A:0.875                   | T:0.125    |                 |
| chr28                                                                 | 11641278 2 | 40 | A:0.925                   | AT:0.075   |                 |
| chr28                                                                 | 11641403 2 | 34 | A:0.941176                |            | C:0.0588235     |
| chr28                                                                 | 11641509 2 | 38 | G:0.921053                |            | A:0.0789474     |
| chr28                                                                 | 11641581 2 | 38 | A:1                       | G:0        |                 |
| chr28                                                                 | 11641643 2 | 36 | C:0.888889                |            | T:0.111111      |
| chr28                                                                 | 11641993 2 | 36 | C:0.805556                |            | T:0.194444      |
| chr28                                                                 | 11642098 2 | 40 | AG:0.75                   | A:0.25     |                 |
| chr28                                                                 | 11642201 2 | 38 | G:1                       | A:0        |                 |
| chr28                                                                 | 11642416 2 | 38 | G:0.736842                |            | C:0.263158      |
| chr28                                                                 | 11642575 2 | 38 | G:0.842105                |            | A:0.157895      |
| chr28                                                                 | 11642692 2 | 34 | A:0.794118                |            | G:0.205882      |
| chr28                                                                 | 11642904 2 | 38 | T:0.815789                |            | C:0.184211      |
| chr28                                                                 | 11643368 2 | 38 | CCT:1                     | C:0        |                 |
| chr28                                                                 | 11643389 2 | 38 | C:0.789474                |            | G:0.210526      |
| chr28                                                                 | 11643473 2 | 40 | C:0.9                     | T:0.1      |                 |
| chr28                                                                 | 11643490 2 | 40 | C:0.8                     | T:0.2      |                 |
| chr28                                                                 | 11643556 2 | 40 | A:0.8                     | G:0.2      |                 |
| chr28                                                                 | 11643956 2 | 40 | G:0.8                     | A:0.2      |                 |
| chr28                                                                 | 11643994 2 | 38 | C:0.763158                |            | T:0.236842      |
| chr28                                                                 | 11644107 2 | 38 | A:1                       | G:0        |                 |
| chr28                                                                 | 11644288 2 | 34 | T:0.735294                |            | C:0.264706      |
| chr28                                                                 | 11644717 2 | 38 | A:0.789474                |            | G:0.210526      |
| chr28                                                                 | 11644808 2 | 40 | A:0.95                    | G:0.05     |                 |
| chr28                                                                 | 11645247 2 | 40 | A:0.8                     | G:0.2      |                 |
| chr28                                                                 | 11646411 2 | 40 | T:0.875                   | C:0.125    |                 |
| chr28                                                                 | 11646414 2 | 40 | C:0.9                     | T:0.1      |                 |



|       |          |   |    |               |           |               |
|-------|----------|---|----|---------------|-----------|---------------|
| chr28 | 11646644 | 2 | 38 | C:1           | T:0       |               |
| chr28 | 11647305 | 2 | 34 | GT:0.823529   |           | G:0.176471    |
| chr28 | 11648316 | 2 | 34 | TG:0.911765   |           | T:0.0882353   |
| chr28 | 11648719 | 2 | 38 | C:0.684211    |           | G:0.315789    |
| chr28 | 11648877 | 2 | 40 | G:0.975       | A:0.025   |               |
| chr28 | 11648879 | 2 | 40 | G:0.8         | GCA:0.2   |               |
| chr28 | 11649448 | 2 | 38 | C:0.921053    |           | T:0.0789474   |
| chr28 | 11649850 | 2 | 38 | T:0.842105    |           | C:0.157895    |
| chr28 | 11650074 | 2 | 36 | T:0.694444    |           | C:0.305556    |
| chr28 | 11650446 | 2 | 40 | A:0.95        | T:0.05    |               |
| chr28 | 11650763 | 2 | 38 | T:1           | C:0       |               |
| chr28 | 11651129 | 2 | 38 | C:0.789474    |           | CT:0.210526   |
| chr28 | 11651162 | 2 | 38 | G:0.789474    |           | A:0.210526    |
| chr28 | 11651188 | 2 | 40 | C:0.775       | T:0.225   |               |
| chr28 | 11651220 | 2 | 38 | G:0.789474    |           | A:0.210526    |
| chr28 | 11651262 | 2 | 38 | G:0.763158    |           | C:0.236842    |
| chr28 | 11651378 | 2 | 36 | A:0.777778    |           | G:0.222222    |
| chr28 | 11651404 | 2 | 36 | C:0.805556    |           | T:0.194444    |
| chr28 | 11651493 | 2 | 40 | A:0.75        | T:0.25    |               |
| chr28 | 11651708 | 2 | 40 | C:0.9         | T:0.1     |               |
| chr28 | 11651773 | 2 | 38 | G:0.815789    |           | A:0.184211    |
| chr28 | 11651917 | 2 | 40 | T:0.775       | A:0.225   |               |
| chr28 | 11651918 | 2 | 40 | T:0.775       | C:0.225   |               |
| chr28 | 11651981 | 2 | 40 | C:0.75        | CTT:0.25  |               |
| chr28 | 11652232 | 2 | 28 | C:0.821429    |           | CCTT:0.178571 |
| chr28 | 11652278 | 2 | 30 | C:1           | T:0       |               |
| chr28 | 11652330 | 2 | 26 | T:0.923077    |           | C:0.0769231   |
| chr28 | 11652763 | 2 | 32 | C:0.96875     |           | CTA:0.03125   |
| chr28 | 11653163 | 2 | 38 | GAGA:0.815789 |           | G:0.184211    |
| chr28 | 11653191 | 2 | 36 | C:0.972222    |           | T:0.0277778   |
| chr28 | 11653359 | 2 | 40 | A:0.9         | G:0.1     |               |
| chr28 | 11653409 | 2 | 32 | C:0.875       | A:0.125   |               |
| chr28 | 11653426 | 2 | 32 | G:0.875       | A:0.125   |               |
| chr28 | 11653579 | 2 | 32 | A:0.75        | T:0.25    |               |
| chr28 | 11653592 | 2 | 32 | T:0.75        | A:0.25    |               |
| chr28 | 11654206 | 2 | 24 | C:0.875       | T:0.125   |               |
| chr28 | 11654215 | 2 | 24 | A:0.791667    |           | G:0.208333    |
| chr28 | 11654296 | 2 | 36 | C:0.722222    |           | T:0.277778    |
| chr28 | 11654401 | 2 | 40 | T:0.875       | G:0.125   |               |
| chr28 | 11654527 | 2 | 38 | C:0.868421    |           | T:0.131579    |
| chr28 | 11654533 | 2 | 38 | T:0.736842    |           | C:0.263158    |
| chr28 | 11654573 | 3 | 40 | CCT:0.45      | C:0.25    | CCTCTCT:0.3   |
| chr28 | 11654622 | 2 | 40 | C:0.8         | T:0.2     |               |
| chr28 | 11654717 | 2 | 38 | G:0.789474    |           | C:0.210526    |
| chr28 | 11654744 | 2 | 40 | T:0.8         | C:0.2     |               |
| chr28 | 11654788 | 2 | 40 | C:0.775       | T:0.225   |               |
| chr28 | 11654806 | 2 | 40 | G:0.775       | GGA:0.225 |               |
| chr28 | 11654835 | 2 | 40 | A:0.725       | G:0.275   |               |
| chr28 | 11654906 | 2 | 40 | C:0.875       | T:0.125   |               |
| chr28 | 11655174 | 2 | 40 | C:0.875       | T:0.125   |               |
| chr28 | 11655291 | 2 | 38 | C:0.815789    |           | T:0.184211    |
| chr28 | 11655316 | 2 | 38 | G:0.815789    |           | A:0.184211    |
| chr28 | 11655319 | 2 | 38 | G:1           | A:0       |               |
| chr28 | 11655324 | 2 | 38 | C:0.894737    |           | T:0.105263    |

|            |               |   |                  |                   |                |
|------------|---------------|---|------------------|-------------------|----------------|
| chr28      | 11655454      | 2 | 38               | T:0.789474        | TCTTA:0.210526 |
| chr28      | 11655790      | 2 | 40               | T:0.825 C:0.175   |                |
| chr28      | 11655791      | 2 | 40               | G:0.825 A:0.175   |                |
| chr28      | 11655925      | 2 | 38               | A:0.921053        | G:0.0789474    |
| chr28      | 11655948      | 2 | 40               | G:0.8 A:0.2       |                |
| chr28      | 11656006      | 2 | 38               | C:1 T:0           |                |
| chr28      | 11656314      | 2 | 38               | A:0.789474        | G:0.210526     |
| chr28      | 11656333      | 2 | 38               | A:0.789474        | C:0.210526     |
| chr28      | 11656345      | 2 | 38               | A:0.789474        | C:0.210526     |
| chr28      | 11656370      | 2 | 40               | A:0.9 G:0.1       |                |
| chr28      | 11656439      | 2 | 38               | C:0.736842        | T:0.263158     |
| chr28      | 11656683      | 2 | 40               | C:0.75 G:0.25     |                |
| chr28      | 11656689      | 2 | 40               | C:0.95 G:0.05     |                |
| chr28      | 11656782      | 2 | 40               | G:0.775 A:0.225   |                |
| chr28      | 11656805      | 2 | 40               | AG:0.8 A:0.2      |                |
| chr28      | 11656806      | 2 | 40               | G:0.85 A:0.15     |                |
| chr28      | 11656895      | 2 | 38               | A:0.815789        | T:0.184211     |
| chr28      | 11657017      | 2 | 40               | A:0.925 G:0.075   |                |
| chr28      | 11657049      | 2 | 38               | A:0.789474        | C:0.210526     |
| chr28      | 11657074      | 2 | 38               | A:0.921053        | T:0.0789474    |
| chr28      | 11657122      | 2 | 40               | T:1 C:0           |                |
| chr28      | 11657324      | 2 | 38               | A:0.763158        | G:0.236842     |
| chr28      | 11657342      | 2 | 38               | A:0.763158        | C:0.236842     |
| chr28      | 11657425      | 2 | 40               | A:0.775 G:0.225   |                |
| chr28      | 11657472      | 2 | 40               | CT:0.925 C:0.075  |                |
| chr28      | 11657604      | 2 | 40               | A:0.8 G:0.2       |                |
| chr28      | 11657746      | 2 | 40               | T:0.8 C:0.2       |                |
| chr28      | 11657954      | 5 | 40               | GTTATTATTATTA:0.1 | G:0.3          |
| GTTA:0     | GTTATTA:0.225 |   | GTTATTATTA:0.375 |                   |                |
| chr28      | 11657963      | 2 | 40               | A:0.9 G:0.1       |                |
| chr28      | 11657969      | 2 | 40               | A:1 G:0           |                |
| chr28      | 11658263      | 2 | 38               | A:0.921053        | G:0.0789474    |
| chr28      | 11658441      | 2 | 38               | C:0.631579        | A:0.368421     |
| chr28      | 11658526      | 2 | 38               | A:0.921053        | T:0.0789474    |
| chr28      | 11658790      | 2 | 36               | C:0.916667        | A:0.0833333    |
| chr28      | 11658823      | 2 | 34               | A:0.588235        | G:0.411765     |
| chr28      | 11659626      | 2 | 40               | C:0.9 CT:0.1      |                |
| chr28      | 11659758      | 2 | 38               | T:0.894737        | C:0.105263     |
| chr28      | 11661093      | 3 | 36               | A:0.638889        | C:0.0833333    |
| T:0.277778 |               |   |                  |                   |                |
| chr28      | 11661214      | 2 | 40               | T:0.6 TA:0.4      |                |
| chr28      | 11661386      | 2 | 38               | G:0.921053        | A:0.0789474    |
| chr28      | 11661490      | 2 | 36               | C:0.888889        | T:0.111111     |
| chr28      | 11661717      | 2 | 38               | C:0.631579        | T:0.368421     |
| chr28      | 11661758      | 2 | 40               | A:0.7 G:0.3       |                |
| chr28      | 11661816      | 2 | 40               | T:1 A:0           |                |
| chr28      | 11661817      | 2 | 40               | G:1 T:0           |                |
| chr28      | 11661984      | 2 | 38               | T:0.684211        | C:0.315789     |
| chr28      | 11662084      | 2 | 38               | T:0.921053        | C:0.0789474    |
| chr28      | 11662169      | 2 | 38               | C:0.921053        | T:0.0789474    |
| chr28      | 11662237      | 2 | 38               | T:0.947368        | TTAGGTAGAATA:  |
| 0.0526316  |               |   |                  |                   |                |
| chr28      | 11662282      | 2 | 38               | G:0.973684        | C:0.0263158    |
| chr28      | 11662462      | 2 | 40               | AAC:0.85 A:0.15   |                |

|       |            |    |                         |               |
|-------|------------|----|-------------------------|---------------|
| chr28 | 11662480 2 | 40 | ACTGTGAGCTACACTGAC:0.85 | A:0.15        |
| chr28 | 11662796 2 | 38 | A:0.657895              | AC:0.342105   |
| chr28 | 11662804 2 | 38 | C:0.921053              | T:0.0789474   |
| chr28 | 11662825 2 | 40 | G:0.7                   | A:0.3         |
| chr28 | 11662862 2 | 40 | T:0.7                   | A:0.3         |
| chr28 | 11662884 2 | 40 | A:0.75                  | T:0.25        |
| chr28 | 11663181 2 | 36 | A:0.972222              | ACT:0.0277778 |
| chr28 | 11663292 2 | 40 | A:0.7                   | T:0.3         |
| chr28 | 11663403 2 | 36 | T:0.611111              | C:0.388889    |
| chr28 | 11663419 2 | 36 | T:0.722222              | C:0.277778    |
| chr28 | 11663575 2 | 38 | C:0.578947              | T:0.421053    |
| chr28 | 11663586 2 | 38 | A:0.578947              | AT:0.421053   |
| chr28 | 11663630 2 | 38 | C:0.605263              | T:0.394737    |
| chr28 | 11663675 2 | 38 | T:0.921053              | C:0.0789474   |
| chr28 | 11663739 2 | 38 | G:0.631579              | T:0.368421    |
| chr28 | 11663741 2 | 38 | G:0.921053              | C:0.0789474   |
| chr28 | 11663792 2 | 38 | A:0.578947              | C:0.421053    |
| chr28 | 11663894 2 | 40 | GA:0.525                | G:0.475       |
| chr28 | 11663948 2 | 38 | C:0.526316              | T:0.473684    |
| chr28 | 11664110 2 | 40 | A:0.925                 | T:0.075       |
| chr28 | 11664191 2 | 38 | T:0.736842              | C:0.263158    |
| chr28 | 11664251 2 | 38 | CATA:0.605263           | C:0.394737    |
| chr28 | 11664254 2 | 38 | A:0.894737              | T:0.105263    |
| chr28 | 11664256 2 | 38 | T:0.894737              | C:0.105263    |
| chr28 | 11664326 2 | 40 | C:0.625                 | T:0.375       |
| chr28 | 11664351 2 | 40 | T:0.625                 | C:0.375       |
| chr28 | 11664406 2 | 40 | G:0.675                 | C:0.325       |
| chr28 | 11664486 2 | 40 | A:0.9                   | T:0.1         |
| chr28 | 11664713 2 | 40 | G:0.95                  | A:0.05        |
| chr28 | 11664724 2 | 40 | G:0.625                 | A:0.375       |
| chr28 | 11664901 2 | 40 | C:0.925                 | A:0.075       |
| chr28 | 11664945 2 | 40 | C:0.875                 | A:0.125       |
| chr28 | 11664965 2 | 40 | T:0.95                  | A:0.05        |
| chr28 | 11665294 2 | 38 | A:0.552632              | G:0.447368    |
| chr28 | 11665320 2 | 36 | C:0.694444              | T:0.305556    |
| chr28 | 11665484 2 | 38 | G:0.552632              | GA:0.447368   |
| chr28 | 11665594 2 | 38 | G:0.605263              | A:0.394737    |
| chr28 | 11665678 2 | 38 | T:0.5                   | C:0.5         |
| chr28 | 11665705 2 | 36 | C:0.694444              | T:0.305556    |
| chr28 | 11665706 2 | 36 | A:0.555556              | G:0.444444    |
| chr28 | 11665989 2 | 40 | C:0.95                  | T:0.05        |
| chr28 | 11666004 2 | 40 | G:1                     | C:0           |
| chr28 | 11666012 2 | 40 | T:0.95                  | C:0.05        |
| chr28 | 11666106 2 | 40 | G:0.9                   | A:0.1         |
| chr28 | 11666130 2 | 38 | T:0.578947              | C:0.421053    |
| chr28 | 11666159 2 | 40 | G:0.6                   | T:0.4         |
| chr28 | 11666161 2 | 40 | C:0.65                  | T:0.35        |
| chr28 | 11666193 2 | 38 | C:1                     | T:0           |
| chr28 | 11666285 2 | 38 | C:0.526316              | T:0.473684    |
| chr28 | 11666395 2 | 40 | G:0.55                  | T:0.45        |
| chr28 | 11666414 2 | 40 | T:0.575                 | C:0.425       |
| chr28 | 11666482 2 | 40 | G:0.55                  | A:0.45        |
| chr28 | 11666629 2 | 38 | G:0.605263              | T:0.394737    |
| chr28 | 11666647 2 | 38 | C:0.921053              | G:0.0789474   |

|       |            |    |                   |               |
|-------|------------|----|-------------------|---------------|
| chr28 | 11666701 2 | 40 | C:0.625 T:0.375   |               |
| chr28 | 11666755 2 | 40 | G:0.725 A:0.275   |               |
| chr28 | 11666762 2 | 40 | C:0.725 T:0.275   |               |
| chr28 | 11666835 2 | 38 | CATT:0.894737     | C:0.105263    |
| chr28 | 11666869 2 | 38 | A:0.894737        | T:0.105263    |
| chr28 | 11666939 2 | 38 | A:0.5 T:0.5       |               |
| chr28 | 11667041 2 | 38 | C:0.578947        | A:0.421053    |
| chr28 | 11667295 2 | 40 | TAC:0.975         | T:0.025       |
| chr28 | 11667321 2 | 40 | CACACAA:0.975     | C:0.025       |
| chr28 | 11667323 2 | 40 | CACAA:0.85        | C:0.15        |
| chr28 | 11667325 2 | 40 | CAA:0.8 C:0.2     |               |
| chr28 | 11667469 2 | 40 | C:0.775 T:0.225   |               |
| chr28 | 11667474 2 | 40 | G:0.575 A:0.425   |               |
| chr28 | 11667485 2 | 38 | C:0.842105        | G:0.157895    |
| chr28 | 11667540 2 | 40 | G:0.55 A:0.45     |               |
| chr28 | 11667708 2 | 36 | T:0.944444        | TAC:0.0555556 |
| chr28 | 11667740 2 | 40 | A:0.55 G:0.45     |               |
| chr28 | 11667796 2 | 40 | T:0.575 C:0.425   |               |
| chr28 | 11667797 2 | 40 | T:0.575 A:0.425   |               |
| chr28 | 11667809 2 | 40 | G:0.95 A:0.05     |               |
| chr28 | 11667887 2 | 38 | A:1 G:0           |               |
| chr28 | 11668132 2 | 38 | T:0.605263        | C:0.394737    |
| chr28 | 11668503 2 | 40 | C:0.95 T:0.05     |               |
| chr28 | 11668526 2 | 40 | GT:0.9 G:0.1      |               |
| chr28 | 11668732 2 | 38 | GA:0.947368       | G:0.0526316   |
| chr28 | 11668754 2 | 38 | C:0.947368        | T:0.0526316   |
| chr28 | 11668838 2 | 36 | A:0.972222        | G:0.0277778   |
| chr28 | 11668925 2 | 38 | GCCTTTAA:0.921053 | G:            |
|       | 0.0789474  |    |                   |               |
| chr28 | 11668967 2 | 34 | T:0.941176        | C:0.0588235   |
| chr28 | 11669252 2 | 36 | T:0.916667        | C:0.0833333   |
| chr28 | 11669308 2 | 38 | C:0.973684        | A:0.0263158   |
| chr28 | 11669781 2 | 40 | G:0.95 C:0.05     |               |
| chr28 | 11670042 2 | 40 | CAT:0.95 C:0.05   |               |
| chr28 | 11670043 3 | 40 | A:0.625 ATG:0.375 | ATGTG:0       |
| chr28 | 11670061 2 | 40 | G:0.95 A:0.05     |               |
| chr28 | 11670064 2 | 40 | C:0.95 G:0.05     |               |
| chr28 | 11670314 2 | 40 | AC:0.8 A:0.2      |               |
| chr28 | 11670454 2 | 38 | G:0.921053        | A:0.0789474   |
| chr28 | 11670603 2 | 40 | A:0.65 T:0.35     |               |
| chr28 | 11671073 2 | 40 | C:0.825 T:0.175   |               |
| chr28 | 11671184 2 | 40 | G:0.675 A:0.325   |               |
| chr28 | 11671202 2 | 40 | C:0.625 T:0.375   |               |
| chr28 | 11671346 2 | 40 | T:0.55 C:0.45     |               |
| chr28 | 11671361 2 | 40 | C:0.55 T:0.45     |               |
| chr28 | 11671460 2 | 40 | T:1 A:0           |               |
| chr28 | 11671813 2 | 40 | C:0.6 T:0.4       |               |
| chr28 | 11671926 2 | 40 | G:1 A:0           |               |
| chr28 | 11671947 2 | 40 | C:0.525 G:0.475   |               |
| chr28 | 11672114 2 | 40 | ACTTTCC:0.975     | A:0.025       |
| chr28 | 11672145 2 | 40 | A:0.975 G:0.025   |               |
| chr28 | 11672149 2 | 38 | T:0.578947        | A:0.421053    |
| chr28 | 11672178 2 | 36 | A:0.888889        | G:0.111111    |
| chr28 | 11672321 2 | 38 | C:1 G:0           |               |

|                         |                             |   |    |                        |                |
|-------------------------|-----------------------------|---|----|------------------------|----------------|
| chr28                   | 11672355                    | 2 | 36 | T:0.888889             | G:0.111111     |
| chr28                   | 11672417                    | 2 | 36 | TG:0.694444            | T:0.305556     |
| chr28                   | 11672566                    | 6 | 38 | TTTTATTTATTTATTTATTTA: | 0.157895       |
| T:0.578947              | TTTTA:0.105263              |   |    | TTTTATTTA:0.0263158    |                |
| TTTTATTTATTTA:0.0526316 | TTTTATTTATTTATTTA:0.0789474 |   |    |                        |                |
| chr28                   | 11672615                    | 2 | 38 | TTTA:0.868421          | T:0.131579     |
| chr28                   | 11672855                    | 2 | 40 | GTAAT:0.825            | G:0.175        |
| chr28                   | 11672983                    | 2 | 36 | GATTA:0.833333         | G:0.166667     |
| chr28                   | 11674067                    | 2 | 38 | C:0.552632             | A:0.447368     |
| chr28                   | 11674195                    | 3 | 38 | TA:0.631579            | T:0.342105     |
| TAA:0.0263158           |                             |   |    |                        |                |
| chr28                   | 11674415                    | 2 | 40 | T:1                    | A:0            |
| chr28                   | 11674480                    | 2 | 38 | C:1                    | A:0            |
| chr28                   | 11675099                    | 4 | 38 | TAA:0.684211           | T:0.0263158    |
| TA:0.0789474            | TAAA:0.210526               |   |    |                        |                |
| chr28                   | 11675118                    | 2 | 38 | GA:0.815789            | G:0.184211     |
| chr28                   | 11675396                    | 2 | 38 | C:0.605263             | CA:0.394737    |
| chr28                   | 11675414                    | 2 | 38 | G:1                    | A:0            |
| chr28                   | 11675566                    | 2 | 40 | G:0.9                  | A:0.1          |
| chr28                   | 11675926                    | 2 | 40 | TA:0.625               | T:0.375        |
| chr28                   | 11676070                    | 2 | 38 | A:1                    | AT:0           |
| chr28                   | 11676090                    | 2 | 40 | A:0.8                  | T:0.2          |
| chr28                   | 11676203                    | 2 | 40 | T:0.7                  | TA:0.3         |
| chr28                   | 11676290                    | 2 | 38 | G:0.894737             | A:0.105263     |
| chr28                   | 11676352                    | 2 | 40 | C:0.675                | T:0.325        |
| chr28                   | 11676692                    | 2 | 38 | TAAA:0.605263          | T:0.394737     |
| chr28                   | 11676696                    | 2 | 38 | A:0.710526             | T:0.289474     |
| chr28                   | 11676739                    | 2 | 34 | T:0.588235             | C:0.411765     |
| chr28                   | 11676836                    | 2 | 36 | C:0.777778             | G:0.222222     |
| chr28                   | 11676889                    | 2 | 34 | C:0.882353             | T:0.117647     |
| chr28                   | 11677022                    | 2 | 38 | T:0.657895             | TAGTC:0.342105 |
| chr28                   | 11677158                    | 2 | 38 | A:0.657895             | AAG:0.342105   |
| chr28                   | 11677159                    | 2 | 38 | A:1                    | AG:0           |
| chr28                   | 11677164                    | 2 | 38 | T:1                    | A:0            |
| chr28                   | 11677170                    | 2 | 38 | A:1                    | G:0            |
| chr28                   | 11677360                    | 2 | 40 | C:0.675                | CA:0.325       |
| chr28                   | 11677631                    | 3 | 38 | TGAGA:0.578947         | T:0            |
| 0.421053                |                             |   |    |                        | TGAGAGA:       |
| chr28                   | 11677662                    | 2 | 38 | C:0.921053             | T:0.0789474    |
| chr28                   | 11677675                    | 2 | 38 | C:0.684211             | A:0.315789     |
| chr28                   | 11677838                    | 2 | 36 | C:0.611111             | G:0.388889     |
| chr28                   | 11678159                    | 3 | 34 | C:0.705882             | CT:0.117647    |
| CCTT:0.176471           |                             |   |    |                        |                |
| chr28                   | 11678183                    | 2 | 32 | T:0.5                  | C:0.5          |
| chr28                   | 11678370                    | 2 | 38 | A:1                    | G:0            |
| chr28                   | 11678849                    | 2 | 40 | T:1                    | C:0            |
| chr28                   | 11678978                    | 2 | 38 | A:0.789474             | AT:0.210526    |
| chr28                   | 11679100                    | 2 | 34 | T:0.911765             | C:0.0882353    |
| chr28                   | 11679252                    | 2 | 38 | C:1                    | A:0            |
| chr28                   | 11679465                    | 2 | 40 | C:0.625                | T:0.375        |
| chr28                   | 11679592                    | 2 | 36 | A:1                    | C:0            |
| chr28                   | 11679828                    | 2 | 30 | TC:0.566667            | T:0.433333     |
| chr28                   | 11680019                    | 2 | 30 | C:0.866667             | T:0.133333     |
| chr28                   | 11680206                    | 2 | 36 | C:0.666667             | G:0.333333     |

|       |           |   |    |                          |               |          |
|-------|-----------|---|----|--------------------------|---------------|----------|
| chr28 | 11680249  | 2 | 34 | C:0.617647               | T:0.382353    |          |
| chr28 | 11680371  | 2 | 38 | G:0.815789               | A:0.184211    |          |
| chr28 | 11680456  | 2 | 36 | T:0.833333               | C:0.166667    |          |
| chr28 | 11680552  | 2 | 32 | C:0                      | CA:1          |          |
| chr28 | 11681024  | 2 | 36 | G:0.861111               | A:0.138889    |          |
| chr28 | 11681265  | 2 | 40 | T:0.925                  | A:0.075       |          |
| chr28 | 11681314  | 2 | 38 | C:0.921053               | T:0.0789474   |          |
| chr28 | 11681488  | 2 | 38 | CAGAAACTCGGATGG:0.947368 | C:            |          |
|       | 0.0526316 |   |    |                          |               |          |
| chr28 | 11681515  | 2 | 38 | G:1                      | A:0           |          |
| chr28 | 11681635  | 2 | 38 | T:0.815789               | G:0.184211    |          |
| chr28 | 11681638  | 2 | 38 | A:0.894737               | ACAG:0.105263 |          |
| chr28 | 11681822  | 2 | 40 | T:0.575                  | G:0.425       |          |
| chr28 | 11681960  | 2 | 38 | C:0.868421               | T:0.131579    |          |
| chr28 | 11681964  | 2 | 38 | C:1                      | T:0           |          |
| chr28 | 11682021  | 2 | 36 | G:0.583333               | A:0.416667    |          |
| chr28 | 11682113  | 2 | 40 | T:0.55                   | C:0.45        |          |
| chr28 | 11682143  | 2 | 40 | A:0.875                  | G:0.125       |          |
| chr28 | 11682214  | 2 | 38 | T:0.921053               | C:0.0789474   |          |
| chr28 | 11682221  | 2 | 38 | G:0.921053               | A:0.0789474   |          |
| chr28 | 11682522  | 2 | 38 | T:0.842105               | C:0.157895    |          |
| chr28 | 11682826  | 2 | 38 | C:0.894737               | A:0.105263    |          |
| chr28 | 11682863  | 2 | 38 | C:0.947368               | T:0.0526316   |          |
| chr28 | 11682929  | 2 | 36 | T:0.888889               | C:0.111111    |          |
| chr28 | 11682955  | 2 | 36 | C:0.888889               | T:0.111111    |          |
| chr28 | 11683463  | 2 | 38 | A:0.973684               | C:0.0263158   |          |
| chr28 | 11683516  | 2 | 34 | TA:1                     | T:0           |          |
| chr28 | 11683703  | 2 | 40 | T:1                      | TA:0          |          |
| chr28 | 11683704  | 3 | 40 | T:0.8                    | A:0.025       | TA:0.175 |
| chr28 | 11683871  | 2 | 36 | A:0.833333               | T:0.166667    |          |
| chr28 | 11683882  | 2 | 36 | T:0.833333               | C:0.166667    |          |
| chr28 | 11683904  | 2 | 36 | T:0.944444               | C:0.0555556   |          |
| chr28 | 11683953  | 2 | 40 | G:0.875                  | A:0.125       |          |
| chr28 | 11684268  | 2 | 38 | T:0.868421               | A:0.131579    |          |
| chr28 | 11684270  | 2 | 38 | C:1                      | CT:0          |          |
| chr28 | 11684488  | 2 | 40 | T:0.825                  | C:0.175       |          |
| chr28 | 11684636  | 2 | 40 | T:0.875                  | C:0.125       |          |
| chr28 | 11684830  | 2 | 38 | A:0.789474               | T:0.210526    |          |
| chr28 | 11684927  | 2 | 40 | C:0.875                  | G:0.125       |          |
| chr28 | 11685424  | 2 | 40 | T:0.975                  | C:0.025       |          |
| chr28 | 11685456  | 2 | 38 | A:0.894737               | G:0.105263    |          |
| chr28 | 11685471  | 2 | 38 | T:0.973684               | C:0.0263158   |          |
| chr28 | 11685838  | 2 | 40 | C:1                      | T:0           |          |
| chr28 | 11686012  | 2 | 36 | C:0.888889               | A:0.111111    |          |
| chr28 | 11686046  | 2 | 38 | C:0.842105               | T:0.157895    |          |
| chr28 | 11686094  | 2 | 38 | G:0.921053               | T:0.0789474   |          |
| chr28 | 11686482  | 2 | 40 | C:0.9                    | A:0.1         |          |
| chr28 | 11686583  | 2 | 38 | G:0.921053               | C:0.0789474   |          |
| chr28 | 11686733  | 2 | 40 | A:0.925                  | T:0.075       |          |
| chr28 | 11687334  | 2 | 40 | A:0.65                   | G:0.35        |          |
| chr28 | 11687417  | 2 | 40 | C:1                      | T:0           |          |
| chr28 | 11688034  | 2 | 38 | A:1                      | C:0           |          |
| chr28 | 11688227  | 2 | 38 | T:0.947368               | C:0.0526316   |          |
| chr28 | 11688665  | 2 | 40 | A:0.725                  | T:0.275       |          |

|       |               |   |    |               |                         |
|-------|---------------|---|----|---------------|-------------------------|
| chr28 | 11688672      | 2 | 40 | T:0.725       | TCTC:0.275              |
| chr28 | 11688771      | 2 | 40 | G:0.875       | A:0.125                 |
| chr28 | 11688958      | 2 | 34 | T:0.441176    | TA:0.558824             |
| chr28 | 11689308      | 2 | 38 | T:0.789474    | A:0.210526              |
| chr28 | 11689682      | 2 | 38 | G:0.710526    | A:0.289474              |
| chr28 | 11690414      | 2 | 36 | C:0.583333    | T:0.416667              |
| chr28 | 11690489      | 2 | 38 | T:1           | G:0                     |
| chr28 | 11690556      | 2 | 40 | A:0.65        | ACAAAGTAGTGTCATC:0.35   |
| chr28 | 11690879      | 2 | 18 | TCC:1         | T:0                     |
| chr28 | 11690883      | 2 | 16 | CCCCA:0.9375  | C:0.0625                |
| chr28 | 11690885      | 2 | 18 | CCCA:0.777778 | C:0.222222              |
| chr28 | 11690888      | 2 | 18 | ACCC:1        | A:0                     |
| chr28 | 11690889      | 2 | 18 | C:0.777778    | G:0.222222              |
| chr28 | 11690977      | 2 | 38 | T:0.447368    | C:0.552632              |
| chr28 | 11691100      | 2 | 38 | T:0.736842    | C:0.263158              |
| chr28 | 11691179      | 2 | 40 | T:1           | C:0                     |
| chr28 | 11691215      | 2 | 36 | C:0.694444    | G:0.305556              |
| chr28 | 11691342      | 4 | 32 | TAAA:0.5      | T:0                     |
|       | TAAAA:0.21875 |   |    |               | TA:0.28125              |
| chr28 | 11691381      | 3 | 34 | C:0.411765    | CT:0.264706             |
|       | CTT:0.323529  |   |    |               |                         |
| chr28 | 11691535      | 2 | 18 | AAT:0.444444  | A:0.555556              |
| chr28 | 11691644      | 2 | 20 | A:0.45        | G:0.55                  |
| chr28 | 11691670      | 2 | 22 | T:0.727273    | C:0.272727              |
| chr28 | 11691825      | 2 | 38 | A:0.605263    | C:0.394737              |
| chr28 | 11691854      | 2 | 40 | G:0.675       | C:0.325                 |
| chr28 | 11691905      | 2 | 40 | C:1           | T:0                     |
| chr28 | 11691985      | 2 | 40 | T:1           | TA:0                    |
| chr28 | 11691988      | 2 | 40 | T:1           | TA:0                    |
| chr28 | 11691989      | 2 | 40 | T:1           | TA:0                    |
| chr28 | 11691991      | 2 | 40 | T:1           | TATTTATTTA:0            |
| chr28 | 11691992      | 2 | 40 | T:1           | TATTTATTTA:0            |
| chr28 | 11691996      | 3 | 40 | T:1           | C:0                     |
| chr28 | 11692094      | 2 | 40 | T:1           | C:0                     |
| chr28 | 11692109      | 2 | 40 | G:1           | A:0                     |
| chr28 | 11692111      | 2 | 40 | T:1           | G:0                     |
| chr28 | 11692146      | 2 | 40 | T:0.65        | C:0.35                  |
| chr28 | 11692697      | 4 | 38 | TAAA:0.289474 | T:0.157895              |
|       | TA:0.394737   |   |    |               | TAA:0.157895            |
| chr28 | 11692903      | 2 | 40 | C:1           | T:0                     |
| chr28 | 11692913      | 2 | 38 | TGA:0.210526  | T:0.789474              |
| chr28 | 11692931      | 2 | 40 | A:0.975       | T:0.025                 |
| chr28 | 11692946      | 2 | 40 | AAGAG:1       | A:0                     |
| chr28 | 11692990      | 2 | 40 | G:1           | T:0                     |
| chr28 | 11693149      | 2 | 40 | C:1           | T:0                     |
| chr28 | 11693163      | 2 | 40 | G:1           | A:0                     |
| chr28 | 11693239      | 2 | 38 | C:0.315789    | T:0.684211              |
| chr28 | 11693250      | 2 | 38 | G:1           | A:0                     |
| chr28 | 11693427      | 2 | 40 | T:1           | TAAATTCTAGCTAGAAAAAAA:0 |
| chr28 | 11693736      | 2 | 40 | A:0.6         | G:0.4                   |
| chr28 | 11693880      | 2 | 38 | A:1           | G:0                     |
| chr28 | 11693898      | 2 | 38 | C:0.578947    | T:0.421053              |
| chr28 | 11694331      | 2 | 40 | C:1           | CAGGG:0                 |
| chr28 | 11694333      | 2 | 40 | T:1           | TCC:0                   |

|               |          |   |    |                |                           |  |
|---------------|----------|---|----|----------------|---------------------------|--|
| chr28         | 11694335 | 2 | 40 | T:1            | TGGGTGGCGCAGCGGTTTGGCGCC: |  |
| 0             |          |   |    |                |                           |  |
| chr28         | 11694776 | 2 | 36 | A:1            | G:0                       |  |
| chr28         | 11694790 | 2 | 40 | C:1            | T:0                       |  |
| chr28         | 11695051 | 2 | 40 | G:1            | A:0                       |  |
| chr28         | 11695127 | 2 | 38 | C:0.684211     | T:0.315789                |  |
| chr28         | 11695129 | 2 | 38 | C:0.684211     | T:0.315789                |  |
| chr28         | 11695454 | 3 | 38 | A:0.973684     | AT:0.0263158              |  |
| ATT:0         |          |   |    |                |                           |  |
| chr28         | 11695464 | 2 | 38 | A:0.315789     | T:0.684211                |  |
| chr28         | 11695499 | 2 | 36 | TGAGA:0.333333 | T:0.666667                |  |
| chr28         | 11695895 | 2 | 38 | G:1            | T:0                       |  |
| chr28         | 11695928 | 2 | 36 | A:1            | G:0                       |  |
| chr28         | 11695971 | 2 | 38 | C:1            | CA:0                      |  |
| chr28         | 11696043 | 2 | 38 | T:1            | C:0                       |  |
| chr28         | 11696157 | 2 | 38 | A:1            | T:0                       |  |
| chr28         | 11696322 | 2 | 40 | T:1            | C:0                       |  |
| chr28         | 11696333 | 2 | 40 | T:0.625        | C:0.375                   |  |
| chr28         | 11696491 | 2 | 40 | T:1            | G:0                       |  |
| chr28         | 11696563 | 2 | 38 | T:0.710526     | C:0.289474                |  |
| chr28         | 11696569 | 2 | 38 | A:1            | C:0                       |  |
| chr28         | 11696667 | 2 | 38 | C:1            | T:0                       |  |
| chr28         | 11696696 | 2 | 38 | G:1            | A:0                       |  |
| chr28         | 11696738 | 2 | 38 | T:1            | C:0                       |  |
| chr28         | 11696739 | 2 | 38 | G:1            | A:0                       |  |
| chr28         | 11696799 | 2 | 40 | G:1            | T:0                       |  |
| chr28         | 11696804 | 2 | 40 | A:0.35         | G:0.65                    |  |
| chr28         | 11696821 | 2 | 40 | TC:1           | T:0                       |  |
| chr28         | 11696879 | 4 | 38 | TAA:0.710526   | T:0.0263158               |  |
| TA:0.0789474  |          |   |    |                |                           |  |
| TAAA:0.184211 |          |   |    |                |                           |  |
| chr28         | 11696890 | 2 | 38 | A:1            | G:0                       |  |
| chr28         | 11696987 | 2 | 38 | C:1            | T:0                       |  |
| chr28         | 11697054 | 2 | 40 | T:0.65         | C:0.35                    |  |
| chr28         | 11697164 | 2 | 38 | T:0.684211     | C:0.315789                |  |
| chr28         | 11697601 | 2 | 38 | T:0.657895     | C:0.342105                |  |
| chr28         | 11697656 | 2 | 40 | G:0.7          | A:0.3                     |  |
| chr28         | 11697697 | 2 | 36 | C:0.722222     | T:0.277778                |  |
| chr28         | 11698030 | 2 | 34 | C:0.617647     | T:0.382353                |  |
| chr28         | 11698157 | 2 | 40 | A:0.65         | G:0.35                    |  |
| chr28         | 11698169 | 2 | 40 | C:0.65         | T:0.35                    |  |
| chr28         | 11698275 | 2 | 40 | T:0.55         | C:0.45                    |  |
| chr28         | 11698653 | 2 | 38 | TC:0.657895    | T:0.342105                |  |
| chr28         | 11698840 | 2 | 38 | T:1            | C:0                       |  |
| chr28         | 11698847 | 2 | 36 | G:1            | T:0                       |  |
| chr28         | 11699712 | 2 | 38 | A:0.947368     | G:0.0526316               |  |
| chr28         | 11699795 | 2 | 38 | C:1            | T:0                       |  |
| chr28         | 11700007 | 2 | 40 | TTGAC:0.675    | T:0.325                   |  |
| chr28         | 11700072 | 2 | 38 | GC:0.473684    | G:0.526316                |  |
| chr28         | 11700076 | 2 | 38 | A:0.473684     | ACTGT:0.526316            |  |
| chr28         | 11700159 | 2 | 40 | T:0.325        | C:0.675                   |  |
| chr28         | 11700274 | 2 | 38 | T:0.368421     | C:0.631579                |  |
| chr28         | 11700395 | 2 | 38 | A:0.631579     | G:0.368421                |  |
| chr28         | 11700691 | 2 | 36 | A:0.805556     | C:0.194444                |  |
| chr28         | 11700988 | 2 | 36 | A:0.5          | AAAG:0.5                  |  |



|                            |          |   |    |                   |               |
|----------------------------|----------|---|----|-------------------|---------------|
| chr28                      | 11701131 | 2 | 38 | C:0.342105        | T:0.657895    |
| chr28                      | 11701418 | 2 | 38 | A:0.315789        | G:0.684211    |
| chr28                      | 11701430 | 2 | 38 | CATG:1            | C:0           |
| chr28                      | 11701535 | 2 | 38 | A:0.368421        | C:0.631579    |
| chr28                      | 11701569 | 2 | 40 | T:0.325           | G:0.675       |
| chr28                      | 11701671 | 2 | 38 | A:0.736842        | G:0.263158    |
| chr28                      | 11701845 | 2 | 40 | C:0.375           | A:0.625       |
| chr28                      | 11702069 | 2 | 40 | A:0.45            | G:0.55        |
| chr28                      | 11702330 | 2 | 40 | T:0.375           | C:0.625       |
| chr28                      | 11702460 | 2 | 38 | G:0.473684        | A:0.526316    |
| chr28                      | 11702480 | 2 | 38 | A:0.473684        | G:0.526316    |
| chr28                      | 11702530 | 2 | 40 | T:0.7             | C:0.3         |
| chr28                      | 11702555 | 2 | 40 | AT:0.925          | A:0.075       |
| chr28                      | 11702576 | 4 | 40 | CAG:0.75          | C:0.25        |
| CAGAGAGAG:0                |          |   |    |                   |               |
| chr28                      | 11702775 | 2 | 38 | A:1               | G:0           |
| chr28                      | 11703062 | 2 | 40 | C:0.95            | A:0.05        |
| chr28                      | 11703929 | 2 | 40 | G:1               | T:0           |
| chr28                      | 11703942 | 2 | 40 | A:0.975           | C:0.025       |
| chr28                      | 11703970 | 3 | 40 | A:0.725           | ATG:0.275     |
| chr28                      | 11703996 | 4 | 40 | G:0.675           | A:0.3         |
| GTGTGTGTA:0.025            |          |   |    |                   |               |
| chr28                      | 11703997 | 2 | 40 | T:1               | TGTAA:0       |
| chr28                      | 11703998 | 2 | 40 | A:0.625           | ATATATG:0.375 |
| chr28                      | 11704093 | 2 | 40 | AACTT:0.7         | A:0.3         |
| chr28                      | 11704168 | 2 | 36 | T:0.5             | G:0.5         |
| chr28                      | 11704368 | 2 | 40 | C:0.975           | T:0.025       |
| chr28                      | 11704375 | 2 | 40 | C:1               | G:0           |
| chr28                      | 11705080 | 2 | 40 | ACCAAGCAGTG:0.875 | A:0.125       |
| chr28                      | 11705272 | 2 | 38 | G:1               | A:0           |
| chr28                      | 11705417 | 2 | 36 | T:0.305556        | C:0.694444    |
| chr28                      | 11705474 | 2 | 36 | CCTCT:0.361111    | C:0.638889    |
| chr28                      | 11705581 | 2 | 40 | G:1               | GATTT:0       |
| chr28                      | 11706162 | 2 | 38 | C:1               | T:0           |
| chr28                      | 11706172 | 2 | 38 | G:1               | A:0           |
| chr28                      | 11706272 | 2 | 40 | T:0.725           | C:0.275       |
| chr28                      | 11706273 | 2 | 40 | G:1               | A:0           |
| chr28                      | 11706669 | 2 | 34 | G:1               | A:0           |
| chr28                      | 11706952 | 2 | 38 | T:0.684211        | G:0.315789    |
| chr28                      | 11707335 | 2 | 38 | T:0.763158        | C:0.236842    |
| chr28                      | 11707436 | 2 | 40 | A:1               | ACTTCTT:0     |
| chr28                      | 11707449 | 2 | 40 | A:0.45            | C:0.55        |
| chr28                      | 11707452 | 2 | 40 | A:0.7             | C:0.3         |
| chr28                      | 11707559 | 2 | 36 | G:0.638889        | A:0.361111    |
| chr28                      | 11707984 | 2 | 36 | G:1               | A:0           |
| chr28                      | 11708024 | 2 | 36 | G:0.25            | C:0.75        |
| chr28                      | 11708418 | 2 | 40 | G:0.65            | A:0.35        |
| chr28                      | 11708746 | 2 | 36 | G:0.722222        | A:0.277778    |
| chr28                      | 11708955 | 2 | 36 | C:1               | T:0           |
| chr28                      | 11709127 | 4 | 38 | CT:0.236842       | C:0.131579    |
| CTT:0.473684 CTTT:0.157895 |          |   |    |                   |               |
| chr28                      | 11709326 | 2 | 38 | C:0.894737        | T:0.105263    |
| chr28                      | 11709496 | 2 | 36 | G:0.805556        | A:0.194444    |
| chr28                      | 11709734 | 2 | 40 | C:0.9             | T:0.1         |

|                 |          |                  |    |                 |                |                                     |
|-----------------|----------|------------------|----|-----------------|----------------|-------------------------------------|
| chr28           | 11710319 | 2                | 40 | A:1             | T:0            |                                     |
| chr28           | 11710511 | 2                | 36 | G:0.555556      |                | A:0.444444                          |
| chr28           | 11710516 | 2                | 36 | A:0.555556      |                | G:0.444444                          |
| chr28           | 11710780 | 2                | 40 | C:1             | CTT:0          |                                     |
| chr28           | 11710832 | 3                | 40 | CAA:0.025       |                | C:0.625 CA:0.35                     |
| chr28           | 11710891 | 2                | 40 | GA:1            | G:0            |                                     |
| chr28           | 11711092 | 2                | 38 | G:0.421053      |                | A:0.578947                          |
| chr28           | 11711396 | 2                | 40 | G:0.4           | A:0.6          |                                     |
| chr28           | 11711437 | 2                | 38 | T:0.631579      |                | C:0.368421                          |
| chr28           | 11711629 | 2                | 38 | G:1             | A:0            |                                     |
| chr28           | 11711654 | 2                | 38 | T:0.684211      |                | C:0.315789                          |
| chr28           | 11712607 | 2                | 40 | C:0.975         | T:0.025        |                                     |
| chr28           | 11712708 | 2                | 40 | T:0.425         | C:0.575        |                                     |
| chr28           | 11712782 | 2                | 40 | T:0.35          | G:0.65         |                                     |
| chr28           | 11712968 | 2                | 36 | G:0.694444      |                | T:0.305556                          |
| chr28           | 11713049 | 2                | 38 | C:0.394737      |                | T:0.605263                          |
| chr28           | 11713254 | 2                | 40 | T:0.975         | C:0.025        |                                     |
| chr28           | 11713386 | 2                | 36 | G:0.333333      |                | A:0.666667                          |
| chr28           | 11713631 | 2                | 38 | G:0.973684      |                | A:0.0263158                         |
| chr28           | 11713777 | 2                | 38 | A:1             | G:0            |                                     |
| chr28           | 11713859 | 2                | 40 | G:0.625         | A:0.375        |                                     |
| chr28           | 11713863 | 2                | 40 | T:1             | C:0            |                                     |
| chr28           | 11713956 | 2                | 36 | C:1             | T:0            |                                     |
| chr28           | 11714060 | 2                | 38 | C:0.526316      |                | T:0.473684                          |
| chr28           | 11714110 | 2                | 38 | A:0.315789      |                | G:0.684211                          |
| chr28           | 11714200 | 2                | 36 | T:0.888889      |                | A:0.111111                          |
| chr28           | 11714236 | 2                | 40 | T:0.825         | C:0.175        |                                     |
| chr28           | 11714550 | 2                | 38 | T:0.789474      |                | A:0.210526                          |
| chr28           | 11714751 | 2                | 38 | C:0.684211      |                | T:0.315789                          |
| chr28           | 11715190 | 2                | 38 | C:0.921053      |                | T:0.0789474                         |
| chr28           | 11715237 | 2                | 38 | G:0.973684      |                | A:0.0263158                         |
| chr28           | 11715489 | 4                | 38 | ATGTG:0.473684  |                | A:0.0263158                         |
| ATG:0.289474    |          | ATGTGTG:0.210526 |    |                 |                |                                     |
| chr28           | 11715586 | 2                | 40 | T:0.8           | G:0.2          |                                     |
| chr28           | 11715625 | 2                | 40 | G:0.75          | GA:0.25        |                                     |
| chr28           | 11715826 | 2                | 38 | A:1             | T:0            |                                     |
| chr28           | 11715885 | 7                | 40 | AACACACAC:0.025 | A:0.075        | AAC:0.375 AACAC:0.2 AACACACACAC:0.1 |
| AACACACACAC:0.1 |          | AACACAC:0.225    |    | AACACACACAC:0   |                |                                     |
| chr28           | 11716376 | 2                | 38 | A:0.789474      |                | G:0.210526                          |
| chr28           | 11716569 | 2                | 38 | C:0.421053      |                | T:0.578947                          |
| chr28           | 11716825 | 2                | 40 | T:1             | C:0            |                                     |
| chr28           | 11717109 | 2                | 40 | C:1             | G:0            |                                     |
| chr28           | 11717110 | 2                | 40 | A:1             | ACTGTTT:0      |                                     |
| chr28           | 11717112 | 2                | 40 | A:1             | T:0            |                                     |
| chr28           | 11717115 | 2                | 40 | A:1             | G:0            |                                     |
| chr28           | 11717116 | 2                | 40 | T:1             | TGTGTTCTGTTT:0 |                                     |
| chr28           | 11717266 | 2                | 40 | A:0.725         | G:0.275        |                                     |
| chr28           | 11717510 | 2                | 36 | G:1             | A:0            |                                     |
| chr28           | 11717633 | 2                | 40 | A:0.775         | G:0.225        |                                     |
| chr28           | 11717756 | 2                | 38 | G:1             | C:0            |                                     |
| chr28           | 11717888 | 2                | 40 | C:0.95          | T:0.05         |                                     |
| chr28           | 11718368 | 2                | 40 | C:1             | T:0            |                                     |
| chr28           | 11718390 | 2                | 38 | C:1             | T:0            |                                     |

|       |            |    |             |           |             |
|-------|------------|----|-------------|-----------|-------------|
| chr28 | 11718504 2 | 40 | G:0.625     | C:0.375   |             |
| chr28 | 11718548 2 | 40 | C:1         | T:0       |             |
| chr28 | 11718549 2 | 40 | C:0.925     | T:0.075   |             |
| chr28 | 11718550 2 | 38 | C:0.631579  |           | T:0.368421  |
| chr28 | 11718551 2 | 40 | G:0.725     | A:0.275   |             |
| chr28 | 11718565 2 | 40 | G:0.725     | A:0.275   |             |
| chr28 | 11718678 2 | 40 | A:0.65      | G:0.35    |             |
| chr28 | 11718698 2 | 40 | C:1         | T:0       |             |
| chr28 | 11718916 2 | 38 | GA:0.921053 |           | G:0.0789474 |
| chr28 | 11718940 2 | 40 | T:0.65      | C:0.35    |             |
| chr28 | 11719139 2 | 40 | G:0.7       | GTCCA:0.3 |             |
| chr28 | 11719152 2 | 40 | C:0.7       | G:0.3     |             |
| chr28 | 11719208 2 | 40 | G:0.55      | A:0.45    |             |
| chr28 | 11719240 2 | 40 | G:1         | A:0       |             |
| chr28 | 11719633 2 | 38 | G:1         | A:0       |             |
| chr28 | 11720081 2 | 38 | T:1         | C:0       |             |
| chr28 | 11720104 2 | 40 | G:0.85      | A:0.15    |             |
| chr28 | 11720159 2 | 38 | G:1         | T:0       |             |
| chr28 | 11720191 2 | 38 | A:0.684211  |           | G:0.315789  |
| chr28 | 11720353 2 | 40 | C:0.75      | T:0.25    |             |
| chr28 | 11720469 2 | 38 | G:0.710526  |           | A:0.289474  |
| chr28 | 11720544 2 | 38 | G:1         | A:0       |             |
| chr28 | 11720960 2 | 40 | A:1         | T:0       |             |
| chr28 | 11720994 2 | 40 | T:0.75      | C:0.25    |             |
| chr28 | 11721002 2 | 40 | A:0.95      | G:0.05    |             |
| chr28 | 11721029 2 | 40 | T:0.75      | A:0.25    |             |
| chr28 | 11721260 2 | 38 | C:0.315789  |           | A:0.684211  |
| chr28 | 11721292 2 | 40 | C:1         | G:0       |             |
| chr28 | 11721367 2 | 40 | T:1         | C:0       |             |
| chr28 | 11721379 2 | 40 | C:1         | T:0       |             |
| chr28 | 11721484 2 | 36 | G:0.416667  |           | A:0.583333  |
| chr28 | 11721567 2 | 38 | T:0.342105  |           | C:0.657895  |
| chr28 | 11721850 2 | 36 | G:0.694444  |           | A:0.305556  |
| chr28 | 11722003 2 | 40 | G:0.95      | A:0.05    |             |
| chr28 | 11722131 2 | 36 | G:0.583333  |           | C:0.416667  |
| chr28 | 11722288 2 | 38 | C:0.315789  |           | T:0.684211  |
| chr28 | 11722477 2 | 40 | A:0.55      | G:0.45    |             |
| chr28 | 11722478 2 | 40 | G:0.55      | T:0.45    |             |
| chr28 | 11722493 2 | 38 | C:1         | A:0       |             |
| chr28 | 11722659 2 | 40 | C:1         | T:0       |             |
| chr28 | 11722660 2 | 40 | A:0.625     | G:0.375   |             |
| chr28 | 11722665 2 | 40 | C:1         | A:0       |             |
| chr28 | 11722748 2 | 40 | TACTC:1     | T:0       |             |
| chr28 | 11723119 2 | 36 | G:1         | T:0       |             |
| chr28 | 11723198 2 | 40 | A:0.975     | G:0.025   |             |
| chr28 | 11723529 2 | 38 | G:0.921053  |           | A:0.0789474 |
| chr28 | 11723617 2 | 36 | T:0.25      | C:0.75    |             |
| chr28 | 11723841 2 | 32 | C:0.6875    | G:0.3125  |             |
| chr28 | 11724083 2 | 34 | CA:1        | C:0       |             |
| chr28 | 11724092 2 | 34 | C:1         | T:0       |             |
| chr28 | 11724129 2 | 40 | A:1         | AGTAAT:0  |             |
| chr28 | 11724174 2 | 40 | T:0.825     | G:0.175   |             |
| chr28 | 11724300 2 | 40 | G:0.45      | A:0.55    |             |
| chr28 | 11724624 2 | 38 | A:1         | ACACGG:0  |             |

|       |          |   |    |              |               |
|-------|----------|---|----|--------------|---------------|
| chr28 | 11724765 | 2 | 38 | C:0.657895   | A:0.342105    |
| chr28 | 11724983 | 2 | 38 | G:0.342105   | A:0.657895    |
| chr28 | 11725122 | 2 | 40 | A:0.6        | C:0.4         |
| chr28 | 11725132 | 2 | 40 | G:0.35       | GA:0.65       |
| chr28 | 11725179 | 2 | 40 | A:0.375      | G:0.625       |
| chr28 | 11725348 | 2 | 40 | G:0.775      | T:0.225       |
| chr28 | 11725375 | 2 | 40 | A:1          | G:0           |
| chr28 | 11725670 | 2 | 40 | C:1          | G:0           |
| chr28 | 11726126 | 2 | 40 | G:0.425      | A:0.575       |
| chr28 | 11726129 | 2 | 40 | A:1          | G:0           |
| chr28 | 11726369 | 2 | 40 | A:0.825      | C:0.175       |
| chr28 | 11726394 | 2 | 40 | A:0.5        | C:0.5         |
| chr28 | 11726402 | 2 | 40 | T:1          | C:0           |
| chr28 | 11726408 | 2 | 40 | G:0.45       | A:0.55        |
| chr28 | 11726499 | 2 | 40 | G:0.825      | C:0.175       |
| chr28 | 11726540 | 2 | 40 | G:0.6        | A:0.4         |
| chr28 | 11726628 | 2 | 40 | C:0.775      | T:0.225       |
| chr28 | 11726945 | 2 | 40 | T:1          | C:0           |
| chr28 | 11726980 | 2 | 38 | G:0.736842   | A:0.263158    |
| chr28 | 11727124 | 2 | 36 | A:0.472222   | AGTT:0.527778 |
| chr28 | 11727419 | 2 | 38 | A:0.394737   | G:0.605263    |
| chr28 | 11727682 | 2 | 40 | G:0.8        | C:0.2         |
| chr28 | 11727699 | 2 | 40 | G:0.8        | A:0.2         |
| chr28 | 11727738 | 2 | 36 | A:0.361111   | T:0.638889    |
| chr28 | 11727777 | 2 | 34 | G:0.941176   | C:0.0588235   |
| chr28 | 11727890 | 2 | 40 | CTTTAT:0.375 | C:0.625       |
| chr28 | 11727942 | 2 | 40 | G:0.375      | C:0.625       |
| chr28 | 11728046 | 2 | 40 | G:1          | A:0           |
| chr28 | 11728195 | 2 | 40 | G:1          | A:0           |
| chr28 | 11728438 | 2 | 40 | T:1          | C:0           |
| chr28 | 11728532 | 2 | 38 | T:0.973684   | TA:0.0263158  |
| chr28 | 11728568 | 2 | 38 | T:0.552632   | C:0.447368    |
| chr28 | 11728934 | 2 | 36 | T:0.444444   | C:0.555556    |
| chr28 | 11728968 | 2 | 38 | G:1          | A:0           |
| chr28 | 11729059 | 2 | 38 | A:0.684211   | G:0.315789    |
| chr28 | 11729062 | 2 | 38 | AC:1         | A:0           |
| chr28 | 11729189 | 2 | 38 | A:0.394737   | G:0.605263    |
| chr28 | 11729208 | 2 | 38 | A:0.894737   | AT:0.105263   |
| chr28 | 11729336 | 2 | 38 | A:0.605263   | T:0.394737    |
| chr28 | 11729414 | 2 | 40 | A:0.975      | AT:0.025      |
| chr28 | 11729845 | 2 | 40 | G:0.95       | GT:0.05       |
| chr28 | 11729856 | 2 | 40 | C:1          | T:0           |
| chr28 | 11730457 | 2 | 40 | T:0.925      | A:0.075       |
| chr28 | 11730557 | 2 | 40 | C:0.55       | A:0.45        |
| chr28 | 11730558 | 2 | 40 | A:0.55       | T:0.45        |
| chr28 | 11730678 | 2 | 38 | G:1          | T:0           |
| chr28 | 11731028 | 2 | 40 | C:0.575      | T:0.425       |
| chr28 | 11731043 | 2 | 38 | AT:0.973684  | A:0.0263158   |
| chr28 | 11731203 | 2 | 38 | A:1          | G:0           |
| chr28 | 11731384 | 2 | 36 | A:0.5        | C:0.5         |
| chr28 | 11731464 | 2 | 40 | T:0.975      | C:0.025       |
| chr28 | 11731567 | 2 | 40 | A:0.925      | G:0.075       |
| chr28 | 11731671 | 2 | 34 | T:1          | C:0           |
| chr28 | 11731708 | 2 | 38 | G:0.921053   | A:0.0789474   |

|       |          |   |    |                      |         |              |
|-------|----------|---|----|----------------------|---------|--------------|
| chr28 | 11731739 | 2 | 38 | T:1                  | TA:0    |              |
| chr28 | 11731740 | 2 | 38 | G:1                  | A:0     |              |
| chr28 | 11731743 | 2 | 38 | G:0.973684           |         | T:0.0263158  |
| chr28 | 11732347 | 2 | 36 | A:1                  | C:0     |              |
| chr28 | 11732348 | 2 | 36 | G:1                  | T:0     |              |
| chr28 | 11732452 | 2 | 40 | T:1                  | C:0     |              |
| chr28 | 11732599 | 2 | 34 | C:1                  | T:0     |              |
| chr28 | 11732701 | 2 | 36 | T:0.972222           |         | C:0.0277778  |
| chr28 | 11732767 | 2 | 38 | G:1                  | A:0     |              |
| chr28 | 11732838 | 2 | 40 | C:0.9                | T:0.1   |              |
| chr28 | 11732942 | 2 | 36 | A:0.916667           |         | T:0.0833333  |
| chr28 | 11733290 | 2 | 40 | G:1                  | A:0     |              |
| chr28 | 11733329 | 2 | 38 | A:0.5                | G:0.5   |              |
| chr28 | 11733710 | 2 | 36 | T:0.555556           |         | C:0.444444   |
| chr28 | 11733715 | 2 | 36 | T:1                  | C:0     |              |
| chr28 | 11733775 | 2 | 38 | T:0.631579           |         | C:0.368421   |
| chr28 | 11734031 | 2 | 34 | G:1                  | A:0     |              |
| chr28 | 11734088 | 2 | 40 | T:0.675              | G:0.325 |              |
| chr28 | 11734722 | 2 | 38 | G:1                  | A:0     |              |
| chr28 | 11734753 | 2 | 38 | T:0.947368           |         | A:0.0526316  |
| chr28 | 11735153 | 2 | 38 | C:1                  | T:0     |              |
| chr28 | 11735175 | 2 | 36 | C:0.972222           |         | CT:0.0277778 |
| chr28 | 11735301 | 2 | 40 | T:0.925              | C:0.075 |              |
| chr28 | 11735469 | 2 | 38 | T:1                  | G:0     |              |
| chr28 | 11735580 | 2 | 38 | TC:1                 | T:0     |              |
| chr28 | 11735631 | 2 | 38 | T:1                  | G:0     |              |
| chr28 | 11735638 | 2 | 38 | T:1                  | A:0     |              |
| chr28 | 11735692 | 2 | 40 | T:0.575              | A:0.425 |              |
| chr28 | 11735701 | 2 | 40 | TAATGTCACTAAGTTTTG:1 |         | T:0          |
| chr28 | 11735782 | 2 | 36 | C:1                  | T:0     |              |
| chr28 | 11735932 | 2 | 36 | A:1                  | C:0     |              |
| chr28 | 11736011 | 2 | 36 | T:1                  | G:0     |              |
| chr28 | 11736058 | 3 | 38 | T:0.868421           |         | TA:0.131579  |
| TAA:0 |          |   |    |                      |         |              |
| chr28 | 11736124 | 2 | 40 | G:1                  | A:0     |              |
| chr28 | 11736154 | 2 | 40 | G:1                  | A:0     |              |
| chr28 | 11736271 | 2 | 40 | A:1                  | G:0     |              |
| chr28 | 11736327 | 2 | 40 | T:1                  | C:0     |              |
| chr28 | 11736399 | 2 | 40 | T:0.475              | C:0.525 |              |
| chr28 | 11736492 | 2 | 38 | G:1                  | A:0     |              |
| chr28 | 11736637 | 2 | 40 | T:1                  | A:0     |              |
| chr28 | 11736659 | 2 | 40 | A:1                  | T:0     |              |
| chr28 | 11736793 | 2 | 36 | A:0.916667           |         | G:0.0833333  |
| chr28 | 11736832 | 2 | 36 | T:1                  | G:0     |              |
| chr28 | 11736989 | 2 | 40 | C:0.975              | A:0.025 |              |
| chr28 | 11737047 | 2 | 40 | G:0.45               | A:0.55  |              |
| chr28 | 11737114 | 2 | 40 | A:0.85               | G:0.15  |              |
| chr28 | 11737167 | 2 | 40 | A:0.575              | C:0.425 |              |
| chr28 | 11737431 | 2 | 40 | T:0.95               | G:0.05  |              |
| chr28 | 11737474 | 2 | 40 | C:0.925              | T:0.075 |              |
| chr28 | 11737555 | 2 | 38 | C:0.973684           |         | T:0.0263158  |
| chr28 | 11737609 | 2 | 40 | T:0.75               | G:0.25  |              |
| chr28 | 11737704 | 2 | 40 | C:1                  | T:0     |              |
| chr28 | 11737793 | 2 | 36 | A:1                  | G:0     |              |

|         |           |         |                 |            |             |                   |
|---------|-----------|---------|-----------------|------------|-------------|-------------------|
| chr28   | 11737835  | 2       | 40              | C:0.675    | T:0.325     |                   |
| chr28   | 11737943  | 2       | 38              | T:0.921053 |             | C:0.0789474       |
| chr28   | 11737988  | 2       | 34              | C:0.911765 |             | A:0.0882353       |
| chr28   | 11738674  | 2       | 38              | A:0.921053 |             | G:0.0789474       |
| chr28   | 11738714  | 2       | 38              | A:0.894737 |             | G:0.105263        |
| chr28   | 11738894  | 2       | 38              | T:0.684211 |             | C:0.315789        |
| chr28   | 11738992  | 2       | 36              | G:0.972222 |             | C:0.0277778       |
| chr28   | 11739053  | 2       | 40              | C:0.925    | T:0.075     |                   |
| chr28   | 11739304  | 2       | 38              | G:0.921053 |             | A:0.0789474       |
| chr28   | 11739353  | 2       | 40              | C:0.925    | CTG:0.075   |                   |
| chr28   | 11739355  | 4       | 40              | C:0.85     | G:0.075     | CTCTG:0.075       |
| CTGTG:0 |           |         |                 |            |             |                   |
| chr28   | 11739443  | 2       | 40              | A:0.4      | G:0.6       |                   |
| chr28   | 11739473  | 2       | 40              | T:0.925    | C:0.075     |                   |
| chr28   | 11739475  | 2       | 40              | G:0.925    | A:0.075     |                   |
| chr28   | 11739534  | 3       | 40              | CCT:0.925  | C:0.05      | CCTCTCT:<br>0.025 |
| chr28   | 11739570  | 2       | 40              | A:0.925    | G:0.075     |                   |
| chr28   | 11739571  | 3       | 40              | TAAAAATTA  | AAAAAAA     | ACTTAAAAA:0.6     |
| T:0.325 | TAAAAATTA | AAAAAAA | ACTTAAAAA:0.075 |            |             |                   |
| chr28   | 11739579  | 2       | 40              | AAAAAAA    | ACTTAAAAAAA | AATT:0.875        |
| A:0.125 |           |         |                 |            |             |                   |
| chr28   | 11739721  | 2       | 36              | A:0.972222 |             | AAG:0.0277778     |
| chr28   | 11739753  | 2       | 36              | G:0.694444 |             | A:0.305556        |
| chr28   | 11739762  | 2       | 38              | A:0.894737 |             | T:0.105263        |
| chr28   | 11739763  | 2       | 38              | G:0.894737 |             | A:0.105263        |
| chr28   | 11739831  | 2       | 40              | T:0.925    | C:0.075     |                   |
| chr28   | 11739926  | 2       | 38              | G:0.842105 |             | T:0.157895        |
| chr28   | 11740697  | 2       | 38              | A:0.842105 |             | C:0.157895        |
| chr28   | 11740934  | 2       | 40              | T:0.85     | A:0.15      |                   |
| chr28   | 11741024  | 2       | 38              | C:0.921053 |             | T:0.0789474       |
| chr28   | 11741241  | 2       | 40              | C:0.975    | T:0.025     |                   |
| chr28   | 11742019  | 2       | 36              | G:0.916667 |             | A:0.0833333       |
| chr28   | 11742044  | 2       | 38              | T:0.447368 |             | G:0.552632        |
| chr28   | 11742213  | 2       | 40              | T:0.925    | C:0.075     |                   |
| chr28   | 11742283  | 2       | 40              | C:0.95     | T:0.05      |                   |
| chr28   | 11742362  | 2       | 40              | T:1        | C:0         |                   |
| chr28   | 11742433  | 2       | 36              | C:0.972222 |             | G:0.0277778       |
| chr28   | 11742883  | 2       | 40              | G:0.975    | A:0.025     |                   |
| chr28   | 11743015  | 2       | 38              | A:1        | C:0         |                   |
| chr28   | 11743065  | 2       | 40              | G:0.75     | A:0.25      |                   |
| chr28   | 11743074  | 2       | 40              | C:0.95     | T:0.05      |                   |
| chr28   | 11743156  | 2       | 38              | C:0.973684 |             | T:0.0263158       |
| chr28   | 11743195  | 2       | 38              | A:0.947368 |             | C:0.0526316       |
| chr28   | 11743291  | 2       | 40              | G:0.6      | A:0.4       |                   |
| chr28   | 11743363  | 2       | 40              | T:0.9      | C:0.1       |                   |
| chr28   | 11743412  | 2       | 38              | T:0.894737 |             | C:0.105263        |
| chr28   | 11743534  | 2       | 38              | C:0.605263 |             | T:0.394737        |
| chr28   | 11743595  | 2       | 40              | T:0.6      | C:0.4       |                   |
| chr28   | 11743633  | 2       | 40              | C:0.925    | T:0.075     |                   |
| chr28   | 11743739  | 2       | 40              | C:0.625    | T:0.375     |                   |
| chr28   | 11743856  | 2       | 34              | C:0.588235 |             | T:0.411765        |
| chr28   | 11743871  | 2       | 34              | C:0.352941 |             | G:0.647059        |
| chr28   | 11744902  | 2       | 38              | T:1        | C:0         |                   |

|       |          |   |    |             |             |               |
|-------|----------|---|----|-------------|-------------|---------------|
| chr28 | 11745129 | 2 | 40 | G:0.975     | A:0.025     |               |
| chr28 | 11745150 | 2 | 38 | C:0.921053  |             | T:0.0789474   |
| chr28 | 11745153 | 2 | 38 | G:0.578947  |             | A:0.421053    |
| chr28 | 11745162 | 2 | 38 | A:0.921053  |             | C:0.0789474   |
| chr28 | 11745296 | 2 | 38 | G:0.605263  |             | A:0.394737    |
| chr28 | 11745342 | 2 | 38 | C:0.894737  |             | CT:0.105263   |
| chr28 | 11745693 | 2 | 40 | A:0.925     | T:0.075     |               |
| chr28 | 11745711 | 2 | 40 | G:0.6       | A:0.4       |               |
| chr28 | 11745848 | 2 | 38 | A:0.578947  |             | C:0.421053    |
| chr28 | 11745895 | 2 | 40 | C:0.7       | G:0.3       |               |
| chr28 | 11746260 | 2 | 38 | C:0.921053  |             | A:0.0789474   |
| chr28 | 11746288 | 2 | 36 | A:0.611111  |             | ATCT:0.388889 |
| chr28 | 11746398 | 2 | 40 | C:0.65      | T:0.35      |               |
| chr28 | 11746450 | 2 | 40 | G:0.65      | A:0.35      |               |
| chr28 | 11746455 | 2 | 40 | C:0.65      | T:0.35      |               |
| chr28 | 11746530 | 2 | 40 | A:0.6       | G:0.4       |               |
| chr28 | 11746608 | 2 | 40 | C:0.95      | T:0.05      |               |
| chr28 | 11746624 | 2 | 40 | T:0.55      | C:0.45      |               |
| chr28 | 11746672 | 2 | 40 | T:0.9       | C:0.1       |               |
| chr28 | 11746701 | 2 | 40 | A:0.65      | G:0.35      |               |
| chr28 | 11746769 | 2 | 40 | T:0.925     | TAGAC:0.075 |               |
| chr28 | 11746774 | 2 | 40 | A:0.6       | C:0.4       |               |
| chr28 | 11746779 | 2 | 40 | T:0.525     | C:0.475     |               |
| chr28 | 11746815 | 2 | 40 | G:0.925     | GC:0.075    |               |
| chr28 | 11746863 | 2 | 40 | T:0.6       | G:0.4       |               |
| chr28 | 11747207 | 2 | 36 | T:1         | C:0         |               |
| chr28 | 11747361 | 2 | 40 | T:0.65      | C:0.35      |               |
| chr28 | 11747383 | 2 | 40 | C:0.65      | T:0.35      |               |
| chr28 | 11747404 | 2 | 40 | A:0.675     | C:0.325     |               |
| chr28 | 11747492 | 2 | 40 | T:0.7       | C:0.3       |               |
| chr28 | 11747632 | 2 | 40 | G:0.95      | T:0.05      |               |
| chr28 | 11747678 | 2 | 40 | A:0.925     | G:0.075     |               |
| chr28 | 11747686 | 2 | 40 | C:1         | T:0         |               |
| chr28 | 11747705 | 2 | 40 | G:0.9       | A:0.1       |               |
| chr28 | 11747918 | 2 | 40 | C:0.925     | T:0.075     |               |
| chr28 | 11748026 | 2 | 40 | A:0.9       | G:0.1       |               |
| chr28 | 11748041 | 2 | 40 | T:0.9       | C:0.1       |               |
| chr28 | 11748103 | 2 | 38 | C:0.894737  |             | A:0.105263    |
| chr28 | 11748179 | 2 | 40 | G:0.925     | A:0.075     |               |
| chr28 | 11748287 | 2 | 40 | T:1         | A:0         |               |
| chr28 | 11748536 | 2 | 40 | A:0.9       | C:0.1       |               |
| chr28 | 11748543 | 2 | 40 | TA:1        | T:0         |               |
| chr28 | 11748559 | 2 | 40 | G:1         | T:0         |               |
| chr28 | 11748669 | 2 | 38 | A:0.921053  |             | T:0.0789474   |
| chr28 | 11748694 | 2 | 38 | C:0.921053  |             | T:0.0789474   |
| chr28 | 11748695 | 2 | 38 | T:0.894737  |             | A:0.105263    |
| chr28 | 11748760 | 2 | 40 | G:0.95      | T:0.05      |               |
| chr28 | 11748768 | 2 | 40 | A:0.95      | T:0.05      |               |
| chr28 | 11748817 | 2 | 40 | C:0.975     | T:0.025     |               |
| chr28 | 11748826 | 2 | 40 | T:0.95      | C:0.05      |               |
| chr28 | 11749230 | 2 | 38 | TC:0.894737 |             | T:0.105263    |
| chr28 | 11749346 | 2 | 36 | A:0.444444  |             | T:0.555556    |
| chr28 | 11749371 | 2 | 40 | T:0.9       | TGTC:0.1    |               |
| chr28 | 11749403 | 2 | 38 | T:0.894737  |             | C:0.105263    |

|       |          |   |    |                   |         |              |
|-------|----------|---|----|-------------------|---------|--------------|
| chr28 | 11749624 | 2 | 40 | AT:0.925          | A:0.075 |              |
| chr28 | 11749767 | 2 | 40 | C:0.975           | T:0.025 |              |
| chr28 | 11750075 | 2 | 40 | G:0.9             | T:0.1   |              |
| chr28 | 11750108 | 2 | 36 | C:0.972222        |         | T:0.0277778  |
| chr28 | 11750118 | 2 | 36 | G:0.972222        |         | A:0.0277778  |
| chr28 | 11750298 | 2 | 38 | A:0.921053        |         | T:0.0789474  |
| chr28 | 11750397 | 2 | 40 | G:0.9             | T:0.1   |              |
| chr28 | 11750477 | 2 | 40 | A:0.925           | C:0.075 |              |
| chr28 | 11750496 | 2 | 40 | T:0.9             | G:0.1   |              |
| chr28 | 11750714 | 2 | 36 | C:0.944444        |         | T:0.0555556  |
| chr28 | 11750793 | 2 | 40 | T:0.925           | G:0.075 |              |
| chr28 | 11751106 | 2 | 36 | C:1               | T:0     |              |
| chr28 | 11751221 | 2 | 40 | AACTC:0.975       |         | A:0.025      |
| chr28 | 11751359 | 2 | 38 | C:0.894737        |         | T:0.105263   |
| chr28 | 11751412 | 2 | 40 | A:0.9             | G:0.1   |              |
| chr28 | 11751632 | 2 | 38 | C:0.921053        |         | G:0.0789474  |
| chr28 | 11751640 | 2 | 40 | C:1               | A:0     |              |
| chr28 | 11751707 | 2 | 40 | G:0.925           | C:0.075 |              |
| chr28 | 11751732 | 2 | 38 | A:0.947368        |         | G:0.0526316  |
| chr28 | 11751741 | 2 | 38 | A:0.973684        |         | G:0.0263158  |
| chr28 | 11751847 | 2 | 38 | C:0.973684        |         | CT:0.0263158 |
| chr28 | 11751848 | 2 | 36 | T:0.944444        |         | C:0.0555556  |
| chr28 | 11752068 | 2 | 40 | G:0.9             | A:0.1   |              |
| chr28 | 11752096 | 2 | 38 | T:0.894737        |         | A:0.105263   |
| chr28 | 11752211 | 2 | 36 | G:0.944444        |         | A:0.0555556  |
| chr28 | 11752340 | 2 | 40 | A:0.9             | G:0.1   |              |
| chr28 | 11752566 | 2 | 38 | TGTTTTTTTG:1      |         | T:0          |
| chr28 | 11752614 | 2 | 38 | ATTTATTT:0.605263 |         | A:           |
|       | 0.394737 |   |    |                   |         |              |
| chr28 | 11752954 | 2 | 36 | T:1               | C:0     |              |
| chr28 | 11752959 | 2 | 32 | T:0               | TA:1    |              |
| chr28 | 11752992 | 2 | 34 | T:0               | C:1     |              |
| chr28 | 11752993 | 2 | 34 | G:0               | T:1     |              |
| chr28 | 11752996 | 2 | 34 | TA:0              | T:1     |              |
| chr28 | 11753001 | 2 | 34 | A:0               | AT:1    |              |
| chr28 | 11753011 | 2 | 34 | C:0               | T:1     |              |
| chr28 | 11753023 | 2 | 34 | C:0               | CT:1    |              |
| chr28 | 11753061 | 2 | 38 | T:0               | C:1     |              |
| chr28 | 11753063 | 2 | 38 | G:0               | T:1     |              |
| chr28 | 11753067 | 2 | 38 | A:0               | AT:1    |              |
| chr28 | 11753073 | 2 | 38 | C:0               | CCTAA:1 |              |
| chr28 | 11753075 | 2 | 38 | G:0               | A:1     |              |
| chr28 | 11753077 | 2 | 38 | ATAT:0            | A:1     |              |
| chr28 | 11753083 | 2 | 38 | G:0               | GT:1    |              |
| chr28 | 11753088 | 2 | 38 | ATT:0             | A:1     |              |
| chr28 | 11753192 | 2 | 38 | C:0.921053        |         | T:0.0789474  |
| chr28 | 11753196 | 2 | 38 | T:0.947368        |         | C:0.0526316  |
| chr28 | 11753328 | 2 | 40 | G:0.5             | A:0.5   |              |
| chr28 | 11753366 | 2 | 38 | C:0.894737        |         | G:0.105263   |
| chr28 | 11753433 | 2 | 40 | T:0.575           | G:0.425 |              |
| chr28 | 11753690 | 2 | 40 | C:0.975           | T:0.025 |              |
| chr28 | 11753833 | 2 | 40 | A:0.9             | G:0.1   |              |
| chr28 | 11753862 | 2 | 40 | TTA:0.9           | T:0.1   |              |
| chr28 | 11753866 | 2 | 40 | T:0.9             | TCA:0.1 |              |



|       |          |   |    |               |              |              |
|-------|----------|---|----|---------------|--------------|--------------|
| chr28 | 11753971 | 2 | 40 | T:0.9         | A:0.1        |              |
| chr28 | 11753989 | 2 | 40 | C:0.9         | T:0.1        |              |
| chr28 | 11754013 | 2 | 40 | G:0.9         | A:0.1        |              |
| chr28 | 11754054 | 2 | 36 | C:0.944444    |              | T:0.0555556  |
| chr28 | 11754316 | 2 | 40 | C:1           | T:0          |              |
| chr28 | 11754371 | 2 | 34 | T:0.911765    |              | G:0.0882353  |
| chr28 | 11754373 | 2 | 34 | C:0.470588    |              | T:0.529412   |
| chr28 | 11754464 | 2 | 36 | A:1           | G:0          |              |
| chr28 | 11754469 | 2 | 36 | G:0.888889    |              | A:0.111111   |
| chr28 | 11754654 | 2 | 40 | G:0.925       | A:0.075      |              |
| chr28 | 11754906 | 2 | 32 | A:0.90625     |              | G:0.09375    |
| chr28 | 11755001 | 2 | 14 | G:0.5         | A:0.5        |              |
| chr28 | 11755008 | 2 | 14 | G:0.714286    |              | A:0.285714   |
| chr28 | 11755023 | 2 | 14 | AG:0.714286   |              | A:0.285714   |
| chr28 | 11755177 | 2 | 38 | A:0.473684    |              | C:0.526316   |
| chr28 | 11755253 | 2 | 36 | C:0.888889    |              | A:0.111111   |
| chr28 | 11755303 | 2 | 36 | T:0.944444    |              | C:0.0555556  |
| chr28 | 11755430 | 2 | 40 | T:0.925       | TTTGTA:0.075 |              |
| chr28 | 11755523 | 2 | 40 | AT:0.9        | A:0.1        |              |
| chr28 | 11755599 | 2 | 38 | A:1           | G:0          |              |
| chr28 | 11755688 | 2 | 38 | G:0.894737    |              | A:0.105263   |
| chr28 | 11755801 | 2 | 38 | T:1           | C:0          |              |
| chr28 | 11755835 | 2 | 40 | TCAGTCCC:0.9  |              | T:0.1        |
| chr28 | 11755867 | 2 | 40 | G:0.9         | C:0.1        |              |
| chr28 | 11755935 | 2 | 40 | C:0.925       | T:0.075      |              |
| chr28 | 11756119 | 2 | 38 | T:0.894737    |              | C:0.105263   |
| chr28 | 11756130 | 2 | 40 | T:0.925       | C:0.075      |              |
| chr28 | 11756251 | 2 | 38 | C:0.921053    |              | T:0.0789474  |
| chr28 | 11756326 | 2 | 38 | C:0.921053    |              | G:0.0789474  |
| chr28 | 11756376 | 2 | 38 | G:0.921053    |              | A:0.0789474  |
| chr28 | 11756482 | 2 | 38 | C:0.921053    |              | CT:0.0789474 |
| chr28 | 11756520 | 2 | 36 | T:1           | C:0          |              |
| chr28 | 11756606 | 2 | 40 | T:0.925       | C:0.075      |              |
| chr28 | 11756788 | 2 | 38 | C:1           | A:0          |              |
| chr28 | 11756847 | 2 | 38 | A:1           | G:0          |              |
| chr28 | 11756853 | 2 | 36 | A:0.888889    |              | G:0.111111   |
| chr28 | 11756973 | 2 | 38 | G:0.868421    |              | T:0.131579   |
| chr28 | 11757038 | 2 | 38 | A:1           | G:0          |              |
| chr28 | 11757176 | 2 | 40 | T:1           | C:0          |              |
| chr28 | 11757276 | 2 | 40 | A:1           | C:0          |              |
| chr28 | 11757417 | 2 | 40 | TG:0.9        | T:0.1        |              |
| chr28 | 11757428 | 2 | 40 | G:0.875       | A:0.125      |              |
| chr28 | 11757535 | 2 | 38 | T:0.894737    |              | C:0.105263   |
| chr28 | 11757544 | 2 | 38 | G:0.894737    |              | A:0.105263   |
| chr28 | 11757665 | 2 | 40 | G:1           | T:0          |              |
| chr28 | 11757782 | 2 | 38 | G:0.973684    |              | A:0.0263158  |
| chr28 | 11757820 | 2 | 40 | C:0.95        | T:0.05       |              |
| chr28 | 11757837 | 2 | 40 | T:0.925       | A:0.075      |              |
| chr28 | 11757933 | 2 | 40 | C:0.85        | T:0.15       |              |
| chr28 | 11757943 | 2 | 40 | A:0.95        | G:0.05       |              |
| chr28 | 11758254 | 2 | 38 | C:0.894737    |              | T:0.105263   |
| chr28 | 11758292 | 2 | 38 | TA:0.894737   |              | T:0.105263   |
| chr28 | 11758421 | 2 | 38 | A:0.921053    |              | G:0.0789474  |
| chr28 | 11758542 | 7 | 40 | TTATATATA:0.3 |              | T:0.025 TTA: |

| 0.025                         | TTATA:0.05 | TTATATA:0.45 | TTATATATATA:0.1         |
|-------------------------------|------------|--------------|-------------------------|
| TTATATATATATA:0.05            |            |              |                         |
| chr28                         | 11758583 2 | 38           | G:0.973684 A:0.0263158  |
| chr28                         | 11758654 2 | 34           | A:0.941176 G:0.0588235  |
| chr28                         | 11758731 2 | 34           | AC:0.911765 A:0.0882353 |
| chr28                         | 11758736 2 | 34           | A:0.911765 AG:0.0882353 |
| chr28                         | 11758846 2 | 32           | AC:1 A:0                |
| chr28                         | 11759155 2 | 36           | A:0.888889 G:0.111111   |
| chr28                         | 11759257 2 | 32           | AG:0.90625 A:0.09375    |
| chr28                         | 11759580 2 | 40           | G:1 GTA:0               |
| chr28                         | 11759626 2 | 40           | T:1 TGTA:0              |
| chr28                         | 11759633 3 | 40           | T:0.9 TAGATTAGA:0.075   |
| TAGATTAGATAGATAGATAGATA:0.025 |            |              |                         |
| chr28                         | 11759650 2 | 40           | T:1 TAG:0               |
| chr28                         | 11759652 2 | 40           | T:1 TAGA:0              |
| chr28                         | 11759654 2 | 40           | G:1 A:0                 |
| chr28                         | 11759656 2 | 40           | C:1 A:0                 |
| chr28                         | 11759659 2 | 40           | T:1 G:0                 |
| chr28                         | 11759663 2 | 40           | T:1 G:0                 |
| chr28                         | 11759666 2 | 40           | A:1 ATTGG:0             |
| chr28                         | 11759678 2 | 40           | CATTG:1 C:0             |
| chr28                         | 11759687 2 | 40           | TATGTG:1 T:0            |
| chr28                         | 11759696 2 | 40           | G:0.95 A:0.05           |
| chr28                         | 11759783 2 | 38           | T:0.894737 C:0.105263   |
| chr28                         | 11759800 2 | 40           | C:1 T:0                 |
| chr28                         | 11759894 2 | 40           | AT:0.9 A:0.1            |
| chr28                         | 11759944 2 | 40           | T:1 C:0                 |
| chr28                         | 11760019 2 | 40           | C:0.975 CA:0.025        |
| chr28                         | 11760300 2 | 38           | C:1 T:0                 |
| chr28                         | 11760339 2 | 40           | A:0.9 G:0.1             |
| chr28                         | 11760449 2 | 40           | C:0.975 T:0.025         |
| chr28                         | 11760463 2 | 40           | C:0.975 T:0.025         |
| chr28                         | 11760472 2 | 40           | A:0.975 T:0.025         |
| chr28                         | 11760557 2 | 38           | T:0.894737 C:0.105263   |
| chr28                         | 11760585 2 | 40           | A:0.975 G:0.025         |
| chr28                         | 11760624 2 | 40           | T:0.925 C:0.075         |
| chr28                         | 11760663 2 | 40           | C:1 CTTTT:0             |
| chr28                         | 11760665 2 | 40           | T:0.95 TTTC:0.05        |
| chr28                         | 11760699 3 | 40           | C:0.775 G:0.125 CAG:0.1 |
| chr28                         | 11760752 2 | 38           | C:1 T:0                 |
| chr28                         | 11760779 2 | 36           | C:0.916667 A:0.0833333  |
| chr28                         | 11760781 2 | 36           | C:1 T:0                 |
| chr28                         | 11760813 2 | 38           | C:0.921053 T:0.0789474  |
| chr28                         | 11760906 2 | 40           | A:0.875 G:0.125         |
| chr28                         | 11760940 2 | 40           | C:0.875 T:0.125         |
| chr28                         | 11761008 2 | 38           | C:1 T:0                 |
| chr28                         | 11761240 2 | 36           | G:0.888889 A:0.111111   |
| chr28                         | 11761340 2 | 40           | A:0.875 G:0.125         |
| chr28                         | 11761480 2 | 38           | C:1 T:0                 |
| chr28                         | 11761669 2 | 40           | C:1 A:0                 |
| chr28                         | 11761738 2 | 40           | T:0.9 C:0.1             |
| chr28                         | 11761758 2 | 40           | T:1 TAATAATCATTTTAAAA:0 |
| chr28                         | 11761798 2 | 40           | CAT:1 C:0               |
| chr28                         | 11762033 2 | 38           | C:1 T:0                 |

|       |                      |                   |    |                         |                           |             |         |
|-------|----------------------|-------------------|----|-------------------------|---------------------------|-------------|---------|
| chr28 | 11762488             | 2                 | 40 | G:1                     | A:0                       |             |         |
| chr28 | 11762505             | 2                 | 40 | A:1                     | G:0                       |             |         |
| chr28 | 11762679             | 2                 | 40 | CCA:0.925               |                           | C:0.075     |         |
| chr28 | 11762724             | 2                 | 38 | A:1                     | G:0                       |             |         |
| chr28 | 11762764             | 4                 | 40 | TACACACACACAC:0.75      |                           |             | T:0.125 |
|       | TACACACACACACAC:0.05 |                   |    | TACACACACACACACAC:0.075 |                           |             |         |
| chr28 | 11762802             | 2                 | 40 | C:1                     | T:0                       |             |         |
| chr28 | 11762821             | 2                 | 38 | G:0.894737              |                           | A:0.105263  |         |
| chr28 | 11762873             | 2                 | 40 | G:1                     | A:0                       |             |         |
| chr28 | 11763027             | 2                 | 40 | A:0.925                 | ACT:0.075                 |             |         |
| chr28 | 11763144             | 2                 | 40 | A:1                     | C:0                       |             |         |
| chr28 | 11763213             | 2                 | 40 | A:0.9                   | C:0.1                     |             |         |
| chr28 | 11763216             | 2                 | 40 | T:1                     | A:0                       |             |         |
| chr28 | 11763384             | 2                 | 40 | G:1                     | T:0                       |             |         |
| chr28 | 11763486             | 2                 | 36 | T:0.916667              |                           | A:0.0833333 |         |
| chr28 | 11763540             | 2                 | 38 | C:0.421053              |                           | A:0.578947  |         |
| chr28 | 11763601             | 2                 | 38 | C:0.894737              |                           | G:0.105263  |         |
| chr28 | 11763663             | 2                 | 40 | TTTC:0.975              |                           | T:0.025     |         |
| chr28 | 11763713             | 2                 | 36 | G:0.611111              |                           | C:0.388889  |         |
| chr28 | 11763777             | 2                 | 38 | G:1                     | A:0                       |             |         |
| chr28 | 11764044             | 2                 | 38 | A:1                     | G:0                       |             |         |
| chr28 | 11764060             | 2                 | 38 | T:0.921053              |                           | G:0.0789474 |         |
| chr28 | 11764519             | 2                 | 40 | T:1                     | C:0                       |             |         |
| chr28 | 11764552             | 2                 | 40 | G:1                     | A:0                       |             |         |
| chr28 | 11764590             | 2                 | 34 | TG:0.558824             |                           | T:0.441176  |         |
| chr28 | 11764592             | 2                 | 38 | GTTT:0.973684           |                           | G:0.0263158 |         |
| chr28 | 11764890             | 2                 | 36 | T:1                     | TAAG:0                    |             |         |
| chr28 | 11765223             | 2                 | 40 | AATC:0.975              |                           | A:0.025     |         |
| chr28 | 11765369             | 2                 | 40 | C:0.975                 | A:0.025                   |             |         |
| chr28 | 11765425             | 2                 | 40 | C:0.9                   | T:0.1                     |             |         |
| chr28 | 11765464             | 2                 | 40 | A:1                     | ATTATTTTTTTATTTTATTATTT:0 |             |         |
| chr28 | 11765465             | 2                 | 40 | C:1                     | CATTAAATTATTTTAAT:0       |             |         |
| chr28 | 11765466             | 2                 | 40 | C:1                     | T:0                       |             |         |
| chr28 | 11765518             | 2                 | 38 | T:1                     | C:0                       |             |         |
| chr28 | 11765627             | 2                 | 36 | C:0.916667              |                           | T:0.0833333 |         |
| chr28 | 11765879             | 2                 | 36 | G:0.916667              |                           | T:0.0833333 |         |
| chr28 | 11766056             | 2                 | 36 | A:1                     | C:0                       |             |         |
| chr28 | 11766099             | 2                 | 34 | A:0.558824              |                           | C:0.441176  |         |
| chr28 | 11766106             | 2                 | 36 | T:1                     | G:0                       |             |         |
| chr28 | 11766189             | 2                 | 36 | A:1                     | T:0                       |             |         |
| chr28 | 11766254             | 2                 | 38 | A:0.578947              |                           | G:0.421053  |         |
| chr28 | 11766328             | 4                 | 40 | AAGAGAGAG:0.425         | A:0.075                   | AAGAGAG:    |         |
|       | 0.5                  | AAGAGAGAGAGAGAG:0 |    |                         |                           |             |         |
| chr28 | 11766490             | 2                 | 40 | CTTTTTTTTTTTTT:0.7      |                           | C:0.3       |         |
| chr28 | 11766584             | 2                 | 34 | C:0.970588              |                           | T:0.0294118 |         |
| chr28 | 11766717             | 2                 | 38 | A:1                     | G:0                       |             |         |
| chr28 | 11767154             | 2                 | 38 | G:0.973684              |                           | T:0.0263158 |         |
| chr28 | 11767267             | 2                 | 38 | G:1                     | A:0                       |             |         |
| chr28 | 11767311             | 2                 | 36 | A:0.472222              |                           | G:0.527778  |         |
| chr28 | 11767397             | 2                 | 38 | C:1                     | T:0                       |             |         |
| chr28 | 11767479             | 2                 | 38 | A:1                     | G:0                       |             |         |
| chr28 | 11767489             | 2                 | 38 | G:0.394737              |                           | A:0.605263  |         |
| chr28 | 11767576             | 2                 | 34 | A:0.617647              |                           | T:0.382353  |         |
| chr28 | 11767711             | 2                 | 38 | T:1                     | C:0                       |             |         |

|       |          |   |    |                    |                 |
|-------|----------|---|----|--------------------|-----------------|
| chr28 | 11767900 | 2 | 40 | T:0.925            | C:0.075         |
| chr28 | 11768021 | 2 | 40 | G:0.475            | GGAAA:0.525     |
| chr28 | 11768093 | 2 | 40 | T:1                | C:0             |
| chr28 | 11768261 | 2 | 38 | CA:0.5             | C:0.5           |
| chr28 | 11768466 | 2 | 38 | C:1                | G:0             |
| chr28 | 11768605 | 2 | 40 | G:1                | A:0             |
| chr28 | 11768624 | 2 | 38 | A:0.868421         | G:0.131579      |
| chr28 | 11768768 | 2 | 40 | T:1                | C:0             |
| chr28 | 11768919 | 2 | 40 | T:0.4              | A:0.6           |
| chr28 | 11768996 | 2 | 36 | A:1                | G:0             |
| chr28 | 11769101 | 2 | 38 | C:0.973684         | CTA:0.0263158   |
| chr28 | 11769122 | 2 | 38 | A:1                | C:0             |
| chr28 | 11769341 | 2 | 40 | C:1                | A:0             |
| chr28 | 11769666 | 2 | 40 | TGGCTTTCCCAAGTAA:1 | T:0             |
| chr28 | 11769689 | 2 | 40 | C:0.925            | A:0.075         |
| chr28 | 11769865 | 2 | 38 | A:0.526316         | G:0.473684      |
| chr28 | 11770022 | 2 | 40 | G:0.925            | C:0.075         |
| chr28 | 11770722 | 2 | 40 | A:0.525            | G:0.475         |
| chr28 | 11770739 | 2 | 38 | TG:0.894737        | T:0.105263      |
| chr28 | 11771238 | 2 | 40 | C:1                | CTTA:0          |
| chr28 | 11771240 | 2 | 40 | T:0.45             | TATG:0.55       |
| chr28 | 11771308 | 2 | 36 | T:1                | C:0             |
| chr28 | 11771840 | 2 | 36 | C:0.916667         | A:0.0833333     |
| chr28 | 11772429 | 2 | 38 | G:0.947368         | C:0.0526316     |
| chr28 | 11772502 | 2 | 40 | T:0.975            | G:0.025         |
| chr28 | 11772564 | 2 | 40 | T:0.525            | C:0.475         |
| chr28 | 11772595 | 2 | 40 | AT:0.7             | A:0.3           |
| chr28 | 11772603 | 2 | 40 | T:1                | A:0             |
| chr28 | 11772715 | 2 | 38 | C:0.631579         | A:0.368421      |
| chr28 | 11773090 | 2 | 36 | A:0.611111         | C:0.388889      |
| chr28 | 11773354 | 2 | 38 | G:0.631579         | A:0.368421      |
| chr28 | 11773427 | 2 | 36 | A:0.972222         | G:0.0277778     |
| chr28 | 11774005 | 2 | 38 | A:0.657895         | C:0.342105      |
| chr28 | 11774216 | 2 | 40 | C:1                | T:0             |
| chr28 | 11774403 | 2 | 38 | A:0.710526         | G:0.289474      |
| chr28 | 11774797 | 2 | 38 | A:0.631579         | T:0.368421      |
| chr28 | 11774834 | 2 | 40 | G:0.675            | A:0.325         |
| chr28 | 11775084 | 2 | 38 | A:0.684211         | G:0.315789      |
| chr28 | 11775145 | 2 | 38 | C:0.973684         | T:0.0263158     |
| chr28 | 11775177 | 2 | 40 | GAATT:1            | G:0             |
| chr28 | 11775270 | 2 | 38 | A:1                | G:0             |
| chr28 | 11775358 | 2 | 36 | C:0.666667         | T:0.333333      |
| chr28 | 11775428 | 2 | 38 | A:0.631579         | G:0.368421      |
| chr28 | 11775447 | 2 | 38 | G:0.631579         | T:0.368421      |
| chr28 | 11775501 | 2 | 34 | A:1                | G:0             |
| chr28 | 11775605 | 2 | 36 | G:0.666667         | T:0.333333      |
| chr28 | 11775627 | 2 | 36 | T:0.666667         | C:0.333333      |
| chr28 | 11775871 | 2 | 38 | A:0.605263         | AC:0.394737     |
| chr28 | 11775945 | 2 | 40 | A:0.725            | G:0.275         |
| chr28 | 11775964 | 2 | 40 | A:0.725            | T:0.275         |
| chr28 | 11776095 | 2 | 40 | A:0.95             | ATT:0.05        |
| chr28 | 11776097 | 2 | 40 | T:0.95             | TTTAAAAG:0.05   |
| chr28 | 11776100 | 2 | 40 | A:0.95             | AGTGATT:0.05    |
| chr28 | 11776103 | 2 | 40 | A:0.95             | AAAGACAGTG:0.05 |

|                           |          |   |    |                                 |              |      |
|---------------------------|----------|---|----|---------------------------------|--------------|------|
| chr28                     | 11776147 | 2 | 38 | C:0.684211                      | T:0.315789   |      |
| chr28                     | 11776163 | 2 | 38 | G:0.657895                      | A:0.342105   |      |
| chr28                     | 11776184 | 2 | 38 | G:0.973684                      | A:0.0263158  |      |
| chr28                     | 11776207 | 2 | 40 | C:0.675                         | G:0.325      |      |
| chr28                     | 11776297 | 2 | 36 | T:0.666667                      | C:0.333333   |      |
| chr28                     | 11776433 | 2 | 40 | T:0.7                           | C:0.3        |      |
| chr28                     | 11776447 | 2 | 38 | A:0.657895                      | G:0.342105   |      |
| chr28                     | 11777017 | 2 | 38 | C:0.5                           | T:0.5        |      |
| chr28                     | 11777084 | 2 | 40 | A:0.95                          | G:0.05       |      |
| chr28                     | 11777250 | 2 | 36 | G:0.611111                      | A:0.388889   |      |
| chr28                     | 11777374 | 2 | 38 | C:0.631579                      | T:0.368421   |      |
| chr28                     | 11777375 | 2 | 38 | A:0.631579                      | G:0.368421   |      |
| chr28                     | 11777393 | 2 | 38 | GTCGAGGAATGTTCCCTCTATC:0.631579 |              |      |
| G:0.368421                |          |   |    |                                 |              |      |
| chr28                     | 11777488 | 2 | 36 | G:0.583333                      | A:0.416667   |      |
| chr28                     | 11777788 | 2 | 40 | C:1                             | G:0          |      |
| chr28                     | 11777938 | 2 | 36 | C:0.611111                      | T:0.388889   |      |
| chr28                     | 11777976 | 2 | 32 | TA:0.59375                      | T:0.40625    |      |
| chr28                     | 11778017 | 2 | 34 | GC:0.970588                     | G:0.0294118  |      |
| chr28                     | 11778027 | 2 | 34 | C:1                             | CAA:0        |      |
| chr28                     | 11778028 | 3 | 36 | C:0.5                           | A:0.416667   | CAA: |
| 0.0833333                 |          |   |    |                                 |              |      |
| chr28                     | 11778091 | 4 | 38 | CATTTTATTTTATTTTATTTT:0.710526  |              |      |
| C:0.0526316               |          |   |    |                                 |              |      |
| CATTTTATTTT:0.0526316     |          |   |    |                                 |              |      |
| CATTTTATTTTATTTT:0.184211 |          |   |    |                                 |              |      |
| chr28                     | 11778217 | 2 | 36 | C:0.972222                      | T:0.0277778  |      |
| chr28                     | 11778246 | 2 | 40 | C:0.65                          | T:0.35       |      |
| chr28                     | 11778341 | 2 | 36 | A:1                             | G:0          |      |
| chr28                     | 11778413 | 2 | 36 | A:1                             | G:0          |      |
| chr28                     | 11778532 | 2 | 40 | G:0.925                         | A:0.075      |      |
| chr28                     | 11778575 | 2 | 36 | A:1                             | C:0          |      |
| chr28                     | 11778602 | 2 | 38 | T:0.684211                      | G:0.315789   |      |
| chr28                     | 11778783 | 2 | 40 | C:1                             | T:0          |      |
| chr28                     | 11778821 | 2 | 36 | GCC:0.555556                    | G:0.444444   |      |
| chr28                     | 11778825 | 2 | 36 | C:1                             | T:0          |      |
| chr28                     | 11779002 | 2 | 38 | CATA:0.973684                   | C:0.0263158  |      |
| chr28                     | 11779171 | 2 | 38 | G:0.973684                      | A:0.0263158  |      |
| chr28                     | 11779249 | 2 | 36 | G:0.694444                      | GAA:0.305556 |      |
| chr28                     | 11779250 | 3 | 38 | G:0.5                           | A:0.342105   | GA:  |
| 0.157895                  |          |   |    |                                 |              |      |
| chr28                     | 11779353 | 2 | 38 | C:0.947368                      | T:0.0526316  |      |
| chr28                     | 11779410 | 2 | 38 | T:0.973684                      | C:0.0263158  |      |
| chr28                     | 11779573 | 2 | 38 | C:0.552632                      | T:0.447368   |      |
| chr28                     | 11779590 | 2 | 38 | C:0.631579                      | T:0.368421   |      |
| chr28                     | 11780213 | 2 | 40 | C:0.925                         | T:0.075      |      |
| chr28                     | 11780473 | 2 | 40 | C:0.75                          | T:0.25       |      |
| chr28                     | 11780645 | 2 | 38 | A:0.921053                      | G:0.0789474  |      |
| chr28                     | 11780700 | 2 | 40 | A:0.825                         | T:0.175      |      |
| chr28                     | 11780841 | 2 | 38 | C:0.921053                      | T:0.0789474  |      |
| chr28                     | 11780901 | 2 | 40 | G:0.925                         | A:0.075      |      |
| chr28                     | 11781118 | 2 | 38 | C:0.921053                      | A:0.0789474  |      |
| chr28                     | 11781195 | 2 | 38 | A:0.5                           | C:0.5        |      |
| chr28                     | 11781246 | 2 | 38 | T:0.921053                      | G:0.0789474  |      |
| chr28                     | 11781633 | 2 | 40 | G:0.5                           | A:0.5        |      |
| chr28                     | 11781671 | 2 | 40 | T:0.975                         | C:0.025      |      |

|              |          |   |    |                               |               |
|--------------|----------|---|----|-------------------------------|---------------|
| chr28        | 11781690 | 2 | 38 | A:0.789474                    | AT:0.210526   |
| chr28        | 11782027 | 2 | 38 | G:1 C:0                       |               |
| chr28        | 11782187 | 2 | 40 | A:0.925 T:0.075               |               |
| chr28        | 11782207 | 2 | 40 | A:0.925 G:0.075               |               |
| chr28        | 11782276 | 2 | 40 | G:0.925 A:0.075               |               |
| chr28        | 11782293 | 2 | 40 | G:0.8 A:0.2                   |               |
| chr28        | 11782738 | 2 | 40 | T:0.925 TGGGTCCCTGGGCTC:0.075 |               |
| chr28        | 11782739 | 2 | 40 | AC:0.925 A:0.075              |               |
| chr28        | 11782818 | 2 | 38 | A:0.947368                    | G:0.0526316   |
| chr28        | 11782888 | 2 | 36 | T:0.916667                    | A:0.0833333   |
| chr28        | 11783074 | 2 | 38 | C:0.947368                    | CCT:0.0526316 |
| chr28        | 11783132 | 3 | 38 | A:0.657895                    | AAC:0.342105  |
| AACAC:0      |          |   |    |                               |               |
| chr28        | 11783381 | 2 | 40 | A:0.75 C:0.25                 |               |
| chr28        | 11783394 | 2 | 40 | G:0.95 A:0.05                 |               |
| chr28        | 11783522 | 2 | 38 | A:0.552632                    | C:0.447368    |
| chr28        | 11783544 | 2 | 38 | A:0.447368                    | G:0.552632    |
| chr28        | 11783653 | 2 | 38 | C:0.921053                    | T:0.0789474   |
| chr28        | 11783726 | 2 | 40 | T:0.9 G:0.1                   |               |
| chr28        | 11783784 | 2 | 38 | G:1 A:0                       |               |
| chr28        | 11783812 | 4 | 40 | T:0.75 TG:0.075 TGGC:0.025    |               |
| TGCG:0.15    |          |   |    |                               |               |
| chr28        | 11783861 | 2 | 38 | AT:0.631579                   | A:0.368421    |
| chr28        | 11784019 | 2 | 40 | G:0.675 A:0.325               |               |
| chr28        | 11784285 | 2 | 38 | T:0.921053                    | A:0.0789474   |
| chr28        | 11784421 | 2 | 40 | A:0.95 T:0.05                 |               |
| chr28        | 11784430 | 2 | 40 | AT:0.775 A:0.225              |               |
| chr28        | 11784451 | 2 | 38 | T:0.421053                    | G:0.578947    |
| chr28        | 11784754 | 2 | 38 | G:0.973684                    | A:0.0263158   |
| chr28        | 11784868 | 2 | 40 | G:0.925 A:0.075               |               |
| chr28        | 11785165 | 2 | 40 | C:0.95 T:0.05                 |               |
| chr28        | 11785291 | 2 | 40 | A:0.95 C:0.05                 |               |
| chr28        | 11785317 | 2 | 40 | C:0.675 CT:0.325              |               |
| chr28        | 11785352 | 2 | 40 | G:0.675 A:0.325               |               |
| chr28        | 11785677 | 2 | 38 | G:0.815789                    | T:0.184211    |
| chr28        | 11786110 | 2 | 38 | C:1 T:0                       |               |
| chr28        | 11786350 | 2 | 38 | A:0.657895                    | G:0.342105    |
| chr28        | 11786469 | 2 | 36 | C:0.944444                    | A:0.0555556   |
| chr28        | 11786795 | 2 | 38 | T:0.684211                    | C:0.315789    |
| chr28        | 11787108 | 3 | 40 | C:0.775 CT:0.2                | CTT:0.025     |
| chr28        | 11787247 | 2 | 40 | G:0.875 A:0.125               |               |
| chr28        | 11787410 | 2 | 40 | T:0.725 C:0.275               |               |
| chr28        | 11787613 | 2 | 40 | T:0.925 G:0.075               |               |
| chr28        | 11787775 | 2 | 40 | A:0.575 T:0.425               |               |
| chr28        | 11787811 | 2 | 40 | AT:0.9 A:0.1                  |               |
| chr28        | 11787840 | 2 | 38 | C:0.710526                    | T:0.289474    |
| chr28        | 11788062 | 4 | 40 | CCT:0.75 C:0.025              | CCTCT:0.075   |
| CCTCTCT:0.15 |          |   |    |                               |               |
| chr28        | 11788087 | 3 | 40 | C:0.85 CTG:0.15               | CTCTG:0       |
| chr28        | 11788253 | 2 | 36 | G:0.861111                    | A:0.138889    |
| chr28        | 11788301 | 2 | 34 | A:1 G:0                       |               |
| chr28        | 11788394 | 2 | 38 | G:1 A:0                       |               |
| chr28        | 11788490 | 2 | 38 | C:0.921053                    | G:0.0789474   |
| chr28        | 11788587 | 2 | 40 | A:0.55 G:0.45                 |               |

|                     |             |    |                     |             |              |         |
|---------------------|-------------|----|---------------------|-------------|--------------|---------|
| chr28               | 11788962 2  | 36 | CACA:1              | C:0         |              |         |
| chr28               | 11788964 2  | 40 | C:0.85              | T:0.15      |              |         |
| chr28               | 11788967 7  | 40 | AAAAT:0.75          |             | A:0          | TAAAT:  |
| 0.075               | AAAATAAAT:0 |    | AAAATAAATAAAT:0.025 |             | ATAAAT:0.15  |         |
| AAAATAAATAAATAAAT:0 |             |    |                     |             |              |         |
| chr28               | 11789007 4  | 40 | T:0.6               | A:0.15      | TAAAA:0.1    |         |
| TAAATAAAA:0.15      |             |    |                     |             |              |         |
| chr28               | 11789017 2  | 36 | T:0.888889          |             | A:0.111111   |         |
| chr28               | 11789228 2  | 36 | CAG:0.833333        |             | C:0.166667   |         |
| chr28               | 11789273 2  | 38 | G:0.894737          |             | A:0.105263   |         |
| chr28               | 11789401 2  | 38 | C:0.921053          |             | CA:0.0789474 |         |
| chr28               | 11789780 2  | 40 | C:1                 | T:0         |              |         |
| chr28               | 11789807 2  | 40 | C:0.675             | T:0.325     |              |         |
| chr28               | 11789860 2  | 38 | A:0.657895          |             | T:0.342105   |         |
| chr28               | 11789949 2  | 40 | G:1                 | GA:0        |              |         |
| chr28               | 11790376 2  | 40 | G:0.925             | T:0.075     |              |         |
| chr28               | 11790436 2  | 40 | A:1                 | C:0         |              |         |
| chr28               | 11790441 2  | 40 | G:1                 | A:0         |              |         |
| chr28               | 11790546 2  | 38 | G:0.447368          |             | A:0.552632   |         |
| chr28               | 11790555 2  | 38 | C:0.578947          |             | A:0.421053   |         |
| chr28               | 11791122 2  | 40 | C:0.925             | T:0.075     |              |         |
| chr28               | 11791647 2  | 40 | T:0.5               | C:0.5       |              |         |
| chr28               | 11791873 2  | 38 | T:0.184211          |             | C:0.815789   |         |
| chr28               | 11791900 2  | 40 | C:0.9               | T:0.1       |              |         |
| chr28               | 11793201 2  | 40 | C:0.875             | T:0.125     |              |         |
| chr28               | 11793581 2  | 38 | C:1                 | T:0         |              |         |
| chr28               | 11793605 2  | 40 | G:1                 | A:0         |              |         |
| chr28               | 11793750 2  | 38 | A:0.894737          |             | AAG:0.105263 |         |
| chr28               | 11793873 2  | 40 | A:0.5               | C:0.5       |              |         |
| chr28               | 11793901 2  | 40 | AT:0.875            | A:0.125     |              |         |
| chr28               | 11794282 2  | 36 | T:1                 | C:0         |              |         |
| chr28               | 11794300 2  | 36 | G:0.944444          |             | T:0.0555556  |         |
| chr28               | 11794318 2  | 38 | G:0.921053          |             | T:0.0789474  |         |
| chr28               | 11794971 2  | 38 | G:1                 | A:0         |              |         |
| chr28               | 11794979 2  | 38 | G:0.473684          |             | A:0.526316   |         |
| chr28               | 11795991 2  | 40 | C:1                 | T:0         |              |         |
| chr28               | 11796018 3  | 40 | T:0.725             | TG:0.125    | TTG:0.15     |         |
| chr28               | 11796027 2  | 40 | G:0.725             | GGA:0.275   |              |         |
| chr28               | 11796042 2  | 40 | T:1                 | C:0         |              |         |
| chr28               | 11796175 2  | 40 | G:1                 | A:0         |              |         |
| chr28               | 11796203 2  | 36 | C:1                 | T:0         |              |         |
| chr28               | 11796322 2  | 40 | C:0.875             | G:0.125     |              |         |
| chr28               | 11796550 2  | 38 | T:0.894737          |             | C:0.105263   |         |
| chr28               | 11796653 2  | 38 | G:0.973684          |             | T:0.0263158  |         |
| chr28               | 11796680 2  | 38 | A:0.868421          |             | C:0.131579   |         |
| chr28               | 11796783 3  | 36 | TA:0.75             | T:0.0833333 | TAA:         |         |
| 0.166667            |             |    |                     |             |              |         |
| chr28               | 11796785 2  | 40 | A:1                 | T:0         |              |         |
| chr28               | 11796954 2  | 40 | T:1                 | TATAA:0     |              |         |
| chr28               | 11796955 4  | 40 | CTAAA:0.55          |             | C:0.4        | ATAAA:0 |
| CTAAATAAA:0.05      |             |    |                     |             |              |         |
| chr28               | 11797048 3  | 38 | GAA:0.5             | G:0.368421  | GA:          |         |
| 0.131579            |             |    |                     |             |              |         |
| chr28               | 11797348 2  | 38 | C:1                 | T:0         |              |         |

|                                           |          |   |    |                      |              |
|-------------------------------------------|----------|---|----|----------------------|--------------|
| chr28                                     | 11797612 | 2 | 40 | C:0.95               | G:0.05       |
| chr28                                     | 11797870 | 2 | 40 | TA:0.975             | T:0.025      |
| chr28                                     | 11797886 | 2 | 40 | C:0.9                | CT:0.1       |
| chr28                                     | 11797924 | 2 | 38 | C:0.894737           | G:0.105263   |
| chr28                                     | 11797926 | 2 | 38 | C:0.894737           | G:0.105263   |
| chr28                                     | 11797930 | 3 | 38 | AAG:0.710526         | A:0.184211   |
| GAG:0.105263                              |          |   |    |                      |              |
| chr28                                     | 11798052 | 2 | 38 | C:0.894737           | T:0.105263   |
| chr28                                     | 11798176 | 2 | 36 | GA:1                 | G:0          |
| chr28                                     | 11798392 | 2 | 38 | T:0.842105           | C:0.157895   |
| chr28                                     | 11798395 | 2 | 38 | C:0.842105           | T:0.157895   |
| chr28                                     | 11798517 | 2 | 40 | AAATG:0.625          | A:0.375      |
| chr28                                     | 11798537 | 2 | 40 | GAATGAATA:1          | G:0          |
| chr28                                     | 11798545 | 2 | 40 | A:0.95               | AATG:0.05    |
| chr28                                     | 11798566 | 2 | 38 | A:0.842105           | C:0.157895   |
| chr28                                     | 11798574 | 2 | 40 | A:1                  | AAG:0        |
| chr28                                     | 11799037 | 2 | 40 | T:0.875              | C:0.125      |
| chr28                                     | 11799055 | 2 | 40 | T:0.75               | G:0.25       |
| chr28                                     | 11799202 | 2 | 36 | C:0.972222           | G:0.0277778  |
| chr28                                     | 11799343 | 2 | 38 | C:0.921053           | T:0.0789474  |
| chr28                                     | 11799356 | 2 | 38 | C:0.921053           | T:0.0789474  |
| chr28                                     | 11799383 | 2 | 28 | C:0.857143           | T:0.142857   |
| chr28                                     | 11799462 | 2 | 40 | A:0.525              | G:0.475      |
| chr28                                     | 11799673 | 2 | 38 | C:1                  | T:0          |
| chr28                                     | 11799848 | 2 | 38 | C:0.815789           | T:0.184211   |
| chr28                                     | 11799928 | 2 | 38 | C:0.842105           | CCT:0.157895 |
| chr28                                     | 11799947 | 2 | 40 | C:0.875              | G:0.125      |
| chr28                                     | 11800055 | 2 | 40 | T:0.7                | C:0.3        |
| chr28                                     | 11800064 | 2 | 40 | TC:0.7               | T:0.3        |
| chr28                                     | 11800122 | 2 | 40 | T:0.6                | C:0.4        |
| chr28                                     | 11800129 | 2 | 40 | T:1                  | G:0          |
| chr28                                     | 11800151 | 2 | 36 | C:1                  | A:0          |
| chr28                                     | 11800187 | 2 | 36 | T:1                  | C:0          |
| chr28                                     | 11800210 | 2 | 38 | G:0.973684           | A:0.0263158  |
| chr28                                     | 11800343 | 4 | 36 | CCTCTCTCTCT:0.722222 | C:           |
| 0.0277778 CCTCT:0.111111 CCTCTCT:0.138889 |          |   |    |                      |              |
| chr28                                     | 11800516 | 2 | 36 | T:0.722222           | A:0.277778   |
| chr28                                     | 11800593 | 2 | 34 | A:0.705882           | C:0.294118   |
| chr28                                     | 11800604 | 2 | 34 | AG:0.970588          | A:0.0294118  |
| chr28                                     | 11800720 | 2 | 38 | A:0.947368           | G:0.0526316  |
| chr28                                     | 11800826 | 2 | 38 | G:0.526316           | A:0.473684   |
| chr28                                     | 11800827 | 2 | 38 | T:1                  | C:0          |
| chr28                                     | 11800915 | 2 | 40 | T:0.475              | G:0.525      |
| chr28                                     | 11801101 | 2 | 38 | T:0.657895           | A:0.342105   |
| chr28                                     | 11801371 | 2 | 38 | G:0.684211           | A:0.315789   |
| chr28                                     | 11801386 | 2 | 38 | A:0.736842           | G:0.263158   |
| chr28                                     | 11801464 | 2 | 38 | A:1                  | C:0          |
| chr28                                     | 11801555 | 2 | 38 | G:1                  | A:0          |
| chr28                                     | 11801669 | 2 | 38 | C:0.894737           | T:0.105263   |
| chr28                                     | 11801788 | 2 | 40 | G:1                  | A:0          |
| chr28                                     | 11802005 | 2 | 38 | G:0.947368           | C:0.0526316  |
| chr28                                     | 11802011 | 2 | 38 | G:0.947368           | A:0.0526316  |
| chr28                                     | 11802016 | 2 | 38 | T:0.710526           | C:0.289474   |
| chr28                                     | 11802098 | 2 | 40 | C:0.55               | CT:0.45      |



|               |          |   |    |                         |         |               |
|---------------|----------|---|----|-------------------------|---------|---------------|
| chr28         | 11802211 | 2 | 40 | A:1                     | T:0     |               |
| chr28         | 11802315 | 2 | 40 | GTTTTCTTTCT:0.95 G:0.05 |         |               |
| chr28         | 11802650 | 2 | 40 | A:0.925                 | C:0.075 |               |
| chr28         | 11802676 | 2 | 40 | C:0.975                 | T:0.025 |               |
| chr28         | 11802821 | 2 | 38 | T:0.789474              |         | C:0.210526    |
| chr28         | 11803773 | 4 | 40 | CGT:0.65                | C:0.1   | CGTGT:0.25    |
| CGTGTGTGTGT:0 |          |   |    |                         |         |               |
| chr28         | 11804481 | 2 | 38 | T:0.657895              |         | C:0.342105    |
| chr28         | 11804513 | 2 | 38 | C:1                     | T:0     |               |
| chr28         | 11804562 | 2 | 40 | C:1                     | T:0     |               |
| chr28         | 11804597 | 2 | 40 | G:1                     | A:0     |               |
| chr28         | 11804796 | 2 | 40 | G:1                     | A:0     |               |
| chr28         | 11804985 | 2 | 34 | G:1                     | A:0     |               |
| chr28         | 11805043 | 2 | 38 | C:0.710526              |         | G:0.289474    |
| chr28         | 11805140 | 2 | 40 | AC:0.7                  | A:0.3   |               |
| chr28         | 11805141 | 2 | 40 | C:0.95                  | A:0.05  |               |
| chr28         | 11805286 | 2 | 38 | A:0.578947              |         | AGAG:0.421053 |
| chr28         | 11805554 | 2 | 38 | C:0.947368              |         | T:0.0526316   |
| chr28         | 11805609 | 2 | 40 | G:0.7                   | T:0.3   |               |
| chr28         | 11805896 | 2 | 40 | T:0.95                  | C:0.05  |               |
| chr28         | 11805899 | 2 | 40 | A:1                     | G:0     |               |
| chr28         | 11806045 | 2 | 40 | G:0.775                 | T:0.225 |               |
| chr28         | 11806146 | 2 | 40 | C:0.65                  | CT:0.35 |               |
| chr28         | 11806176 | 2 | 40 | CA:1                    | C:0     |               |
| chr28         | 11806298 | 2 | 40 | A:0.65                  | G:0.35  |               |
| chr28         | 11806664 | 2 | 38 | A:0.578947              |         | T:0.421053    |
| chr28         | 11807120 | 2 | 40 | TACC:0.675              |         | T:0.325       |
| chr28         | 11807136 | 3 | 40 | CT:0.65                 | C:0.35  | CTT:0         |
| chr28         | 11807147 | 2 | 40 | A:1                     | T:0     |               |
| chr28         | 11807307 | 2 | 40 | CAA:0.925               |         | C:0.075       |
| chr28         | 11807387 | 2 | 38 | G:0.947368              |         | T:0.0526316   |
| chr28         | 11807555 | 2 | 38 | A:0.631579              |         | T:0.368421    |
| chr28         | 11807626 | 2 | 36 | A:0.694444              |         | G:0.305556    |
| chr28         | 11807707 | 2 | 34 | C:0.911765              |         | T:0.0882353   |
| chr28         | 11807769 | 2 | 34 | G:0.794118              |         | A:0.205882    |
| chr28         | 11807828 | 2 | 34 | A:0.735294              |         | G:0.264706    |
| chr28         | 11808195 | 2 | 40 | T:0.75                  | C:0.25  |               |
| chr28         | 11808348 | 2 | 40 | C:0.725                 | T:0.275 |               |
| chr28         | 11808481 | 2 | 38 | T:0.763158              |         | C:0.236842    |
| chr28         | 11808638 | 2 | 40 | C:1                     | T:0     |               |
| chr28         | 11808712 | 2 | 40 | T:0.975                 | C:0.025 |               |
| chr28         | 11809063 | 2 | 40 | T:0.625                 | C:0.375 |               |
| chr28         | 11809072 | 2 | 40 | T:0.625                 | C:0.375 |               |
| chr28         | 11809151 | 2 | 40 | C:0.875                 | T:0.125 |               |
| chr28         | 11809171 | 2 | 40 | G:1                     | A:0     |               |
| chr28         | 11809177 | 2 | 38 | A:0.578947              |         | G:0.421053    |
| chr28         | 11809382 | 2 | 40 | A:0.975                 | G:0.025 |               |
| chr28         | 11809535 | 2 | 40 | C:0.95                  | T:0.05  |               |
| chr28         | 11809603 | 2 | 40 | ATTC:0.725              |         | A:0.275       |
| chr28         | 11809604 | 2 | 40 | TTC:1                   | T:0     |               |
| chr28         | 11809605 | 2 | 40 | TC:1                    | T:0     |               |
| chr28         | 11809606 | 2 | 40 | C:1                     | CT:0    |               |
| chr28         | 11809614 | 2 | 40 | T:0.95                  | TA:0.05 |               |
| chr28         | 11809622 | 2 | 40 | T:0.95                  | C:0.05  |               |

|             |          |   |    |              |                   |
|-------------|----------|---|----|--------------|-------------------|
| chr28       | 11809676 | 2 | 36 | G:0.972222   | A:0.0277778       |
| chr28       | 11809724 | 2 | 36 | C:0.861111   | T:0.138889        |
| chr28       | 11809857 | 2 | 40 | A:0.875      | G:0.125           |
| chr28       | 11809963 | 2 | 36 | A:0.888889   | G:0.111111        |
| chr28       | 11810177 | 2 | 38 | T:0.763158   | A:0.236842        |
| chr28       | 11810265 | 2 | 38 | G:0.736842   | A:0.263158        |
| chr28       | 11810439 | 2 | 40 | G:1          | C:0               |
| chr28       | 11810719 | 2 | 40 | T:0.925      | C:0.075           |
| chr28       | 11810788 | 2 | 40 | T:0.7        | C:0.3             |
| chr28       | 11810820 | 2 | 40 | C:0          | A:1               |
| chr28       | 11810822 | 2 | 40 | T:0          | G:1               |
| chr28       | 11810869 | 2 | 38 | C:0.947368   | T:0.0526316       |
| chr28       | 11810984 | 2 | 40 | C:0.975      | A:0.025           |
| chr28       | 11811150 | 2 | 36 | G:1          | A:0               |
| chr28       | 11811157 | 2 | 36 | G:0.861111   | A:0.138889        |
| chr28       | 11811263 | 2 | 40 | C:0.95       | T:0.05            |
| chr28       | 11811376 | 2 | 38 | C:0.973684   | T:0.0263158       |
| chr28       | 11811557 | 2 | 40 | T:1          | G:0               |
| chr28       | 11811873 | 3 | 38 | CTT:0.605263 | C:0.131579        |
| CT:0.263158 |          |   |    |              |                   |
| chr28       | 11811960 | 2 | 38 | C:0.789474   | T:0.210526        |
| chr28       | 11812022 | 2 | 38 | G:0.710526   | T:0.289474        |
| chr28       | 11812159 | 2 | 38 | G:1          | A:0               |
| chr28       | 11812218 | 2 | 36 | T:0.805556   | A:0.194444        |
| chr28       | 11812393 | 2 | 40 | G:1          | T:0               |
| chr28       | 11812447 | 2 | 40 | T:0.95       | C:0.05            |
| chr28       | 11812641 | 2 | 40 | G:0.975      | C:0.025           |
| chr28       | 11812831 | 2 | 38 | G:0.763158   | A:0.236842        |
| chr28       | 11812881 | 2 | 40 | A:0.725      | AAT:0.275         |
| chr28       | 11813079 | 2 | 38 | G:1          | A:0               |
| chr28       | 11813123 | 2 | 38 | G:1          | A:0               |
| chr28       | 11813221 | 2 | 36 | AC:1         | A:0               |
| chr28       | 11813276 | 2 | 36 | T:0.777778   | TA:0.222222       |
| chr28       | 11813318 | 2 | 40 | A:0.675      | G:0.325           |
| chr28       | 11813397 | 2 | 36 | A:1          | G:0               |
| chr28       | 11813433 | 2 | 40 | C:0.675      | T:0.325           |
| chr28       | 11813461 | 2 | 38 | AAC:1        | A:0               |
| chr28       | 11813649 | 2 | 36 | C:1          | T:0               |
| chr28       | 11813676 | 2 | 38 | T:0.710526   | TCGAGGTC:0.289474 |
| chr28       | 11813870 | 2 | 40 | G:1          | GT:0              |
| chr28       | 11813872 | 2 | 40 | G:1          | GT:0              |
| chr28       | 11813873 | 2 | 40 | G:1          | GATA:0            |
| chr28       | 11813877 | 2 | 40 | G:1          | GAAGTGAA:0        |
| chr28       | 11813879 | 2 | 40 | ATTC:1       | A:0               |
| chr28       | 11813883 | 2 | 40 | T:1          | G:0               |
| chr28       | 11813898 | 2 | 40 | GA:0.45      | G:0.55            |
| chr28       | 11813981 | 2 | 38 | G:0.789474   | A:0.210526        |
| chr28       | 11813984 | 2 | 38 | C:1          | T:0               |
| chr28       | 11814013 | 2 | 38 | T:0.473684   | C:0.526316        |
| chr28       | 11814146 | 2 | 40 | G:0.975      | GA:0.025          |
| chr28       | 11814337 | 2 | 38 | TCTC:1       | T:0               |
| chr28       | 11814602 | 2 | 40 | C:1          | CA:0              |
| chr28       | 11814736 | 2 | 40 | A:1          | C:0               |
| chr28       | 11815053 | 2 | 38 | A:0.947368   | G:0.0526316       |

|                                                 |          |   |    |                     |             |
|-------------------------------------------------|----------|---|----|---------------------|-------------|
| chr28                                           | 11815772 | 2 | 38 | T:0.710526          | A:0.289474  |
| chr28                                           | 11815788 | 2 | 38 | G:0.526316          | A:0.473684  |
| chr28                                           | 11816506 | 3 | 40 | A:0.825             | AAC:0.175   |
| AACACACACAC:0                                   |          |   |    |                     |             |
| chr28                                           | 11816632 | 2 | 40 | T:0.975             | C:0.025     |
| chr28                                           | 11816655 | 2 | 40 | C:0.95              | T:0.05      |
| chr28                                           | 11816786 | 2 | 38 | T:0.973684          | C:0.0263158 |
| chr28                                           | 11816941 | 2 | 38 | C:1                 | T:0         |
| chr28                                           | 11816942 | 2 | 38 | A:0.736842          | G:0.263158  |
| chr28                                           | 11816992 | 2 | 40 | G:0.975             | C:0.025     |
| chr28                                           | 11816998 | 2 | 40 | C:0.975             | T:0.025     |
| chr28                                           | 11817018 | 2 | 40 | A:0.975             | G:0.025     |
| chr28                                           | 11817080 | 2 | 38 | C:1                 | T:0         |
| chr28                                           | 11817154 | 2 | 36 | A:0.972222          | G:0.0277778 |
| chr28                                           | 11817388 | 2 | 38 | A:0.710526          | G:0.289474  |
| chr28                                           | 11817437 | 2 | 38 | T:0.973684          | A:0.0263158 |
| chr28                                           | 11817467 | 2 | 38 | T:0.973684          | C:0.0263158 |
| chr28                                           | 11817485 | 2 | 38 | C:0.973684          | T:0.0263158 |
| chr28                                           | 11817814 | 2 | 40 | C:0.975             | T:0.025     |
| chr28                                           | 11817846 | 2 | 40 | CTAATT:1            | C:0         |
| chr28                                           | 11818123 | 2 | 40 | C:0.975             | T:0.025     |
| chr28                                           | 11818310 | 2 | 40 | A:1                 | G:0         |
| chr28                                           | 11818731 | 2 | 38 | C:0.973684          | T:0.0263158 |
| chr28                                           | 11819259 | 2 | 40 | T:0.975             | C:0.025     |
| chr28                                           | 11819408 | 2 | 40 | A:0.975             | G:0.025     |
| chr28                                           | 11819651 | 2 | 40 | G:0.975             | A:0.025     |
| chr28                                           | 11819773 | 2 | 38 | G:0.973684          | C:0.0263158 |
| chr28                                           | 11819835 | 3 | 34 | CAA:0.382353        | C:0.470588  |
| CA:0.147059                                     |          |   |    |                     |             |
| chr28                                           | 11819852 | 2 | 38 | A:0.973684          | G:0.0263158 |
| chr28                                           | 11819948 | 2 | 40 | A:0.975             | G:0.025     |
| chr28                                           | 11819970 | 2 | 40 |                     |             |
| GTTAACTTAAGTTAAGTTAACTTAAGGCTTAAGTTAAGTTA:0.475 |          |   |    |                     |             |
| chr28                                           | 11820100 | 2 | 40 | T:0.75              | C:0.25      |
| chr28                                           | 11820249 | 2 | 38 | C:0.868421          | T:0.131579  |
| chr28                                           | 11820285 | 3 | 40 | GATAAATAAATAA:0.275 | G:0.15      |
| GATAAATAA:0.575                                 |          |   |    |                     |             |
| chr28                                           | 11820434 | 2 | 40 | T:0.975             | C:0.025     |
| chr28                                           | 11820503 | 2 | 40 | C:0.9               | T:0.1       |
| chr28                                           | 11821191 | 2 | 38 | G:0.868421          | GA:0.131579 |
| chr28                                           | 11821468 | 2 | 40 | T:1                 | TG:0        |
| chr28                                           | 11822074 | 2 | 40 | A:0.475             | T:0.525     |
| chr28                                           | 11822106 | 2 | 40 | C:0.975             | T:0.025     |
| chr28                                           | 11822620 | 2 | 36 | G:0.777778          | T:0.222222  |
| chr28                                           | 11823401 | 2 | 36 | C:1                 | T:0         |
| chr28                                           | 11823549 | 2 | 40 | T:0.575             | C:0.425     |
| chr28                                           | 11823682 | 2 | 38 | G:0.447368          | A:0.552632  |
| chr28                                           | 11823745 | 2 | 40 | A:0.975             | G:0.025     |
| chr28                                           | 11824349 | 2 | 40 | G:1                 | C:0         |
| chr28                                           | 11824401 | 2 | 40 | G:0.4               | A:0.6       |
| chr28                                           | 11824639 | 2 | 40 | T:1                 | G:0         |
| chr28                                           | 11824717 | 2 | 40 | G:0.975             | T:0.025     |
| chr28                                           | 11825067 | 2 | 38 | G:1                 | GC:0        |
| chr28                                           | 11825091 | 2 | 38 | G:1                 | A:0         |

|       |          |   |    |              |                |
|-------|----------|---|----|--------------|----------------|
| chr28 | 11825265 | 2 | 38 | G:0.473684   | A:0.526316     |
| chr28 | 11825271 | 2 | 36 | T:0.694444   | C:0.305556     |
| chr28 | 11825284 | 2 | 38 | C:0.473684   | A:0.526316     |
| chr28 | 11825581 | 2 | 38 | A:0.973684   | G:0.0263158    |
| chr28 | 11825663 | 2 | 40 | C:0.425      | A:0.575        |
| chr28 | 11825667 | 2 | 40 | A:0.45       | T:0.55         |
| chr28 | 11825919 | 2 | 40 | T:1          | C:0            |
| chr28 | 11826023 | 2 | 38 | G:0.5        | A:0.5          |
| chr28 | 11826264 | 2 | 40 | C:0.525      | CA:0.475       |
| chr28 | 11826297 | 2 | 40 | C:1          | T:0            |
| chr28 | 11826375 | 2 | 40 | C:0.45       | A:0.55         |
| chr28 | 11826420 | 2 | 38 | C:0.473684   | T:0.526316     |
| chr28 | 11826445 | 2 | 40 | G:0.55       | C:0.45         |
| chr28 | 11826491 | 2 | 38 | G:0.973684   | A:0.0263158    |
| chr28 | 11826844 | 2 | 40 | A:0.475      | G:0.525        |
| chr28 | 11826905 | 2 | 40 | C:0.625      | CTAAT:0.375    |
| chr28 | 11826973 | 2 | 40 | T:0.975      | C:0.025        |
| chr28 | 11827081 | 2 | 38 | CAATAA:1     | C:0            |
| chr28 | 11827150 | 2 | 38 | A:1          | G:0            |
| chr28 | 11827449 | 2 | 38 | T:1          | C:0            |
| chr28 | 11827559 | 2 | 40 | C:0.975      | T:0.025        |
| chr28 | 11827649 | 2 | 38 | G:1          | A:0            |
| chr28 | 11827729 | 2 | 40 | A:1          | G:0            |
| chr28 | 11827775 | 2 | 40 | C:0.975      | T:0.025        |
| chr28 | 11827790 | 2 | 40 | G:1          | GAT:0          |
| chr28 | 11827919 | 2 | 40 | A:0.575      | T:0.425        |
| chr28 | 11827970 | 2 | 40 | T:1          | A:0            |
| chr28 | 11827995 | 2 | 40 | A:0.975      | ATTATATG:0.025 |
| chr28 | 11828110 | 2 | 40 | C:1          | A:0            |
| chr28 | 11828111 | 2 | 40 | G:0.95       | A:0.05         |
| chr28 | 11828210 | 2 | 40 | G:0.75       | A:0.25         |
| chr28 | 11828230 | 2 | 40 | T:1          | TA:0           |
| chr28 | 11828240 | 2 | 40 | T:1          | A:0            |
| chr28 | 11828364 | 2 | 40 | G:0.5        | A:0.5          |
| chr28 | 11828419 | 2 | 40 | C:0.5        | T:0.5          |
| chr28 | 11828430 | 2 | 40 | G:0.5        | GT:0.5         |
| chr28 | 11828459 | 2 | 40 | C:0.5        | T:0.5          |
| chr28 | 11828495 | 2 | 40 | C:0.45       | T:0.55         |
| chr28 | 11828545 | 2 | 40 | C:0.6        | T:0.4          |
| chr28 | 11828579 | 2 | 40 | T:0.525      | C:0.475        |
| chr28 | 11828585 | 2 | 40 | GA:0.525     | G:0.475        |
| chr28 | 11828601 | 2 | 40 | T:1          | C:0            |
| chr28 | 11828692 | 2 | 40 | G:0.65       | T:0.35         |
| chr28 | 11828724 | 2 | 38 | A:0.763158   | G:0.236842     |
| chr28 | 11828765 | 2 | 32 | G:0.9375     | A:0.0625       |
| chr28 | 11828766 | 2 | 32 | A:0.9375     | G:0.0625       |
| chr28 | 11830489 | 2 | 26 | C:1          | T:0            |
| chr28 | 11830516 | 2 | 34 | ATT:0.882353 | A:0.117647     |
| chr28 | 11830520 | 2 | 34 | T:0.882353   | TAAA:0.117647  |
| chr28 | 11830549 | 2 | 34 | TA:0.647059  | T:0.352941     |
| chr28 | 11830623 | 2 | 38 | G:1          | A:0            |
| chr28 | 11830972 | 2 | 36 | TTC:0.944444 | T:0.0555556    |
| chr28 | 11830989 | 2 | 36 | TC:0.555556  | T:0.444444     |
| chr28 | 11831002 | 2 | 36 | C:0.944444   | T:0.0555556    |

|                                |             |   |    |              |             |                  |
|--------------------------------|-------------|---|----|--------------|-------------|------------------|
| chr28                          | 11831044    | 2 | 36 | A:1          | G:0         |                  |
| chr28                          | 11831052    | 2 | 36 | CT:1         | C:0         |                  |
| chr28                          | 11831054    | 2 | 36 | TA:0.944444  |             | T:0.0555556      |
| chr28                          | 11831158    | 2 | 40 | A:0.5        | AG:0.5      |                  |
| chr28                          | 11831197    | 2 | 38 | G:0.5        | A:0.5       |                  |
| chr28                          | 11831230    | 2 | 38 | ACT:0.973684 |             | A:0.0263158      |
| chr28                          | 11831478    | 2 | 38 | A:0.473684   |             | G:0.526316       |
| chr28                          | 11831512    | 2 | 40 | AT:0.475     | A:0.525     |                  |
| chr28                          | 11831519    | 2 | 40 | C:0.5        | T:0.5       |                  |
| chr28                          | 11831520    | 2 | 40 | C:0.5        | G:0.5       |                  |
| chr28                          | 11831564    | 2 | 40 | A:0.525      | T:0.475     |                  |
| chr28                          | 11831602    | 2 | 40 | T:1          | A:0         |                  |
| chr28                          | 11831672    | 2 | 40 | A:0.45       | G:0.55      |                  |
| chr28                          | 11831673    | 2 | 40 | C:0.975      | T:0.025     |                  |
| chr28                          | 11831689    | 2 | 40 | ATACC:0.45   |             | A:0.55           |
| chr28                          | 11831695    | 2 | 40 | GGAA:0.45    |             | G:0.55           |
| chr28                          | 11831743    | 2 | 38 | A:0.447368   |             | C:0.552632       |
| chr28                          | 11831811    | 2 | 38 | T:0.526316   |             | C:0.473684       |
| chr28                          | 11831902    | 2 | 40 | C:0.375      | T:0.625     |                  |
| chr28                          | 11831994    | 2 | 38 | G:1          | T:0         |                  |
| chr28                          | 11832056    | 2 | 40 | G:1          | A:0         |                  |
| chr28                          | 11832120    | 2 | 36 | G:0.416667   |             | A:0.583333       |
| chr28                          | 11832161    | 2 | 40 | C:0.5        | T:0.5       |                  |
| chr28                          | 11832260    | 2 | 40 | G:0.55       | A:0.45      |                  |
| chr28                          | 11832317    | 2 | 38 | G:0.552632   |             | GA:0.447368      |
| chr28                          | 11832396    | 2 | 38 | A:1          | G:0         |                  |
| chr28                          | 11832428    | 2 | 38 | A:0.552632   |             | G:0.447368       |
| chr28                          | 11832479    | 2 | 40 | C:0.45       | A:0.55      |                  |
| chr28                          | 11832562    | 2 | 40 | G:0.575      | A:0.425     |                  |
| chr28                          | 11832586    | 2 | 40 | T:0.55       | C:0.45      |                  |
| chr28                          | 11832644    | 2 | 38 | T:0.473684   |             | C:0.526316       |
| chr28                          | 11832742    | 5 | 40 | ATTT:0.575   |             | A:0.025 AT:0.025 |
| ATT:0.1                        | ATTTT:0.275 |   |    |              |             |                  |
| chr28                          | 11832909    | 2 | 38 | A:0.5        | G:0.5       |                  |
| chr28                          | 11832947    | 2 | 38 | T:1          | TA:0        |                  |
| chr28                          | 11832948    | 2 | 38 | A:0.815789   |             | T:0.184211       |
| chr28                          | 11832949    | 2 | 38 | G:0.526316   |             | A:0.473684       |
| chr28                          | 11833158    | 2 | 40 | T:1          |             |                  |
| TTAAAACGTTTAAAAAAAATAAAAAAAA:0 |             |   |    |              |             |                  |
| chr28                          | 11833277    | 2 | 40 | C:0.575      | T:0.425     |                  |
| chr28                          | 11833284    | 2 | 40 | T:1          | C:0         |                  |
| chr28                          | 11833337    | 2 | 38 | G:0.605263   |             | A:0.394737       |
| chr28                          | 11833421    | 2 | 40 | G:1          | T:0         |                  |
| chr28                          | 11833456    | 2 | 40 | CA:0         | C:1         |                  |
| chr28                          | 11833459    | 2 | 40 | C:0          | G:1         |                  |
| chr28                          | 11833491    | 2 | 40 | G:0          | GAA:1       |                  |
| chr28                          | 11833492    | 2 | 40 | T:0          | TTAG:1      |                  |
| chr28                          | 11833560    | 2 | 40 | ATGTGAATCT:1 |             | A:0              |
| chr28                          | 11833746    | 2 | 40 | C:0.45       | T:0.55      |                  |
| chr28                          | 11833798    | 2 | 38 | T:1          | C:0         |                  |
| chr28                          | 11833836    | 2 | 36 | T:1          | C:0         |                  |
| chr28                          | 11834109    | 2 | 38 | C:1          | T:0         |                  |
| chr28                          | 11834218    | 2 | 40 | C:0.975      | CCAAA:0.025 |                  |
| chr28                          | 11834221    | 2 | 40 | C:0.975      | T:0.025     |                  |

|       |                       |   |    |                |                          |
|-------|-----------------------|---|----|----------------|--------------------------|
| chr28 | 11834404              | 2 | 38 | A:0.552632     | G:0.447368               |
| chr28 | 11834520              | 2 | 40 | G:0.425        | A:0.575                  |
| chr28 | 11834541              | 2 | 40 | G:0.425        | GT:0.575                 |
| chr28 | 11834686              | 2 | 40 | G:0.45         | A:0.55                   |
| chr28 | 11834708              | 2 | 40 | G:1            | A:0                      |
| chr28 | 11834721              | 2 | 40 | C:0.425        | T:0.575                  |
| chr28 | 11834734              | 2 | 40 | C:0.425        | T:0.575                  |
| chr28 | 11834783              | 2 | 34 | G:0.970588     | A:0.0294118              |
| chr28 | 11834854              | 2 | 38 | A:1            | G:0                      |
| chr28 | 11835063              | 2 | 36 | G:0.611111     | A:0.388889               |
| chr28 | 11835117              | 2 | 38 | C:1            | CA:0                     |
| chr28 | 11835326              | 2 | 40 | G:0.525        | A:0.475                  |
| chr28 | 11835337              | 3 | 40 | T:0.975        | TAAAAATGGGAAGGTAAAAA:    |
| 0.025 | TAAAAATGGGAAGGTAAAAA: | 0 |    |                |                          |
| chr28 | 11835457              | 2 | 40 | G:1            | T:0                      |
| chr28 | 11835484              | 2 | 38 | T:0.526316     | A:0.473684               |
| chr28 | 11835514              | 2 | 38 | C:0.973684     | CA:0.0263158             |
| chr28 | 11835610              | 2 | 36 | T:0.472222     | C:0.527778               |
| chr28 | 11835757              | 2 | 40 | C:0.85         | T:0.15                   |
| chr28 | 11835894              | 2 | 38 | C:0.421053     | T:0.578947               |
| chr28 | 11835919              | 2 | 38 | A:0.421053     | G:0.578947               |
| chr28 | 11835996              | 2 | 36 | T:0.972222     | A:0.0277778              |
| chr28 | 11836065              | 2 | 40 | T:1            | C:0                      |
| chr28 | 11836313              | 2 | 40 | A:0.825        | ATGAGAAAATATTTTTTTTTTTT: |
| 0.175 |                       |   |    |                |                          |
| chr28 | 11836403              | 2 | 40 | C:1            | T:0                      |
| chr28 | 11836409              | 2 | 40 | A:0.5          | G:0.5                    |
| chr28 | 11836574              | 2 | 38 | T:1            | G:0                      |
| chr28 | 11836609              | 2 | 38 | C:0.973684     | A:0.0263158              |
| chr28 | 11836733              | 2 | 38 | C:0.5          | T:0.5                    |
| chr28 | 11836800              | 2 | 38 | T:0.5          | C:0.5                    |
| chr28 | 11836862              | 2 | 40 | G:0.475        | A:0.525                  |
| chr28 | 11837006              | 2 | 40 | A:0.475        | C:0.525                  |
| chr28 | 11837042              | 2 | 40 | A:0.975        | T:0.025                  |
| chr28 | 11837067              | 2 | 40 | C:0.975        | G:0.025                  |
| chr28 | 11837127              | 2 | 38 | A:0.526316     | C:0.473684               |
| chr28 | 11837136              | 2 | 36 | C:1            | A:0                      |
| chr28 | 11837245              | 2 | 40 | T:0.85         | C:0.15                   |
| chr28 | 11837546              | 2 | 40 | T:0.975        | C:0.025                  |
| chr28 | 11837672              | 2 | 40 | G:0.975        | T:0.025                  |
| chr28 | 11837742              | 2 | 38 | A:0.973684     | G:0.0263158              |
| chr28 | 11837794              | 2 | 40 | T:0.575        | A:0.425                  |
| chr28 | 11837849              | 2 | 40 | A:0.475        | G:0.525                  |
| chr28 | 11837878              | 2 | 36 | T:0.916667     | TA:0.0833333             |
| chr28 | 11837879              | 2 | 36 | T:0.888889     | A:0.111111               |
| chr28 | 11838120              | 2 | 40 | G:0.975        | A:0.025                  |
| chr28 | 11838205              | 2 | 38 | TAATG:0.684211 | T:0.315789               |
| chr28 | 11838398              | 2 | 38 | T:0.973684     | A:0.0263158              |
| chr28 | 11838570              | 2 | 40 | A:0.55         | G:0.45                   |
| chr28 | 11838777              | 2 | 36 | G:0.361111     | A:0.638889               |
| chr28 | 11838809              | 2 | 38 | ATC:1          | A:0                      |
| chr28 | 11838940              | 2 | 38 | A:0.421053     | G:0.578947               |
| chr28 | 11839043              | 2 | 38 | G:0.473684     | T:0.526316               |
| chr28 | 11839070              | 2 | 38 | A:0.473684     | G:0.526316               |

|                |          |   |    |                            |              |                |
|----------------|----------|---|----|----------------------------|--------------|----------------|
| chr28          | 11839158 | 2 | 38 | C:0.5                      | T:0.5        |                |
| chr28          | 11839209 | 2 | 38 | T:0.526316                 |              | TAAGA:0.473684 |
| chr28          | 11839356 | 2 | 38 | G:0.447368                 |              | GA:0.552632    |
| chr28          | 11839467 | 2 | 38 | G:0.526316                 |              | C:0.473684     |
| chr28          | 11840040 | 2 | 36 | T:0.972222                 |              | C:0.0277778    |
| chr28          | 11840100 | 2 | 38 | C:0.815789                 |              | A:0.184211     |
| chr28          | 11840264 | 2 | 38 | G:0.473684                 |              | A:0.526316     |
| chr28          | 11840358 | 2 | 40 | T:0.475                    | G:0.525      |                |
| chr28          | 11840359 | 2 | 40 | A:0.475                    | G:0.525      |                |
| chr28          | 11840463 | 2 | 40 | G:0.7                      | C:0.3        |                |
| chr28          | 11841017 | 2 | 40 | AG:0.975                   | A:0.025      |                |
| chr28          | 11841310 | 2 | 40 | T:0.425                    | C:0.575      |                |
| chr28          | 11841644 | 2 | 40 | C:1                        | T:0          |                |
| chr28          | 11841865 | 2 | 34 | T:0.5                      | C:0.5        |                |
| chr28          | 11841892 | 2 | 36 | A:1                        | G:0          |                |
| chr28          | 11841941 | 2 | 38 | G:1                        | A:0          |                |
| chr28          | 11841996 | 2 | 40 | C:0.4                      | T:0.6        |                |
| chr28          | 11842065 | 2 | 40 | T:0.55                     | TTATATC:0.45 |                |
| chr28          | 11842081 | 2 | 40 | A:1                        | G:0          |                |
| chr28          | 11842281 | 2 | 34 | TA:0.970588                |              | T:0.0294118    |
| chr28          | 11842318 | 2 | 40 | C:0.475                    | A:0.525      |                |
| chr28          | 11842384 | 2 | 40 | T:1                        | G:0          |                |
| chr28          | 11842436 | 2 | 40 | A:0.45                     | G:0.55       |                |
| chr28          | 11842615 | 2 | 40 | T:0.525                    | C:0.475      |                |
| chr28          | 11842801 | 2 | 40 | C:0.975                    | A:0.025      |                |
| chr28          | 11842817 | 2 | 40 | G:0.85                     | A:0.15       |                |
| chr28          | 11842837 | 2 | 38 | A:1                        | G:0          |                |
| chr28          | 11842919 | 2 | 38 | A:0.473684                 |              | C:0.526316     |
| chr28          | 11842933 | 2 | 40 | T:0.85                     | A:0.15       |                |
| chr28          | 11843043 | 2 | 38 | A:0.973684                 |              | G:0.0263158    |
| chr28          | 11843103 | 2 | 40 | G:0                        | GA:1         |                |
| chr28          | 11843108 | 2 | 40 | AT:0                       | A:1          |                |
| chr28          | 11843111 | 2 | 40 | G:0                        | A:1          |                |
| chr28          | 11843114 | 2 | 40 | AC:0                       | A:1          |                |
| chr28          | 11843120 | 2 | 40 | G:0                        | A:1          |                |
| chr28          | 11843121 | 2 | 40 | A:0                        | G:1          |                |
| chr28          | 11843135 | 2 | 40 | G:0                        | T:1          |                |
| chr28          | 11843136 | 2 | 40 | A:0                        | G:1          |                |
| chr28          | 11843151 | 2 | 40 | C:0                        | A:1          |                |
| chr28          | 11843152 | 2 | 40 | G:0                        | C:1          |                |
| chr28          | 11843216 | 2 | 40 | GC:0                       | G:1          |                |
| chr28          | 11843431 | 3 | 36 | G:0.527778                 |              | GA:0.222222    |
| GAA:0.25       |          |   |    |                            |              |                |
| chr28          | 11843435 | 2 | 38 | A:0.947368                 |              | G:0.0526316    |
| chr28          | 11843497 | 2 | 40 | C:0.5                      | T:0.5        |                |
| chr28          | 11843521 | 2 | 40 | A:0.925                    | G:0.075      |                |
| chr28          | 11843596 | 2 | 40 | C:0.7                      | T:0.3        |                |
| chr28          | 11843803 | 2 | 34 | T:0.911765                 |              | C:0.0882353    |
| chr28          | 11843819 | 4 | 40 | CCTCTCTCTCTCTCTCTCTCT:0.55 |              | C:0.275        |
| CCTCT:0.125    |          |   |    |                            |              |                |
| CCTCTCTCT:0.05 |          |   |    |                            |              |                |
| chr28          | 11843936 | 2 | 40 | G:0.825                    | A:0.175      |                |
| chr28          | 11844118 | 2 | 12 | C:1                        | T:0          |                |
| chr28          | 11844333 | 2 | 38 | C:0.5                      | A:0.5        |                |
| chr28          | 11844361 | 2 | 40 | AT:0.725                   | A:0.275      |                |

|       |          |   |    |             |              |
|-------|----------|---|----|-------------|--------------|
| chr28 | 11844447 | 2 | 40 | T:0.7       | G:0.3        |
| chr28 | 11844576 | 2 | 40 | C:0.75      | CAAAA:0.25   |
| chr28 | 11845066 | 2 | 28 | C:1         | T:0          |
| chr28 | 11845187 | 2 | 32 | CA:0.96875  | C:0.03125    |
| chr28 | 11845202 | 2 | 32 | C:0.96875   | A:0.03125    |
| chr28 | 11845333 | 2 | 38 | A:0.894737  | G:0.105263   |
| chr28 | 11845820 | 2 | 20 | T:0.95      | A:0.05       |
| chr28 | 11845839 | 2 | 22 | A:0.454545  | G:0.545455   |
| chr28 | 11845849 | 2 | 22 | T:1         | G:0          |
| chr28 | 11845940 | 2 | 40 | C:0.625     | T:0.375      |
| chr28 | 11846050 | 2 | 22 | A:0.636364  | G:0.363636   |
| chr28 | 11846163 | 2 | 38 | T:0.921053  | G:0.0789474  |
| chr28 | 11846225 | 2 | 38 | G:0.973684  | A:0.0263158  |
| chr28 | 11846457 | 2 | 40 | T:0.475     | G:0.525      |
| chr28 | 11846915 | 2 | 38 | GT:0.868421 | G:0.131579   |
| chr28 | 11846968 | 2 | 40 | G:0.475     | A:0.525      |
| chr28 | 11847408 | 2 | 40 | G:0.45      | A:0.55       |
| chr28 | 11847412 | 2 | 40 | C:0.475     | T:0.525      |
| chr28 | 11847489 | 2 | 40 | A:0.625     | G:0.375      |
| chr28 | 11847696 | 2 | 36 | G:0.638889  | A:0.361111   |
| chr28 | 11847823 | 2 | 40 | T:0.975     | G:0.025      |
| chr28 | 11848129 | 2 | 38 | T:0.973684  | C:0.0263158  |
| chr28 | 11848274 | 2 | 40 | A:0.825     | G:0.175      |
| chr28 | 11848503 | 2 | 40 | TTTTTC:0.95 | T:0.05       |
| chr28 | 11848581 | 2 | 38 | A:1         | C:0          |
| chr28 | 11849481 | 2 | 36 | C:0.694444  | T:0.305556   |
| chr28 | 11849660 | 2 | 38 | A:1         | T:0          |
| chr28 | 11849668 | 2 | 38 | A:0.921053  | G:0.0789474  |
| chr28 | 11849831 | 2 | 40 | A:0.5       | G:0.5        |
| chr28 | 11850180 | 2 | 40 | T:0.5       | TA:0.5       |
| chr28 | 11850231 | 2 | 40 | T:0.5       | G:0.5        |
| chr28 | 11850436 | 2 | 40 | T:0.875     | TA:0.125     |
| chr28 | 11850510 | 2 | 38 | C:0.921053  | G:0.0789474  |
| chr28 | 11850866 | 2 | 40 | G:1         | T:0          |
| chr28 | 11851134 | 2 | 38 | G:0.842105  | A:0.157895   |
| chr28 | 11851149 | 2 | 36 | CT:0.555556 | C:0.444444   |
| chr28 | 11851158 | 2 | 36 | T:0.638889  | A:0.361111   |
| chr28 | 11851160 | 2 | 38 | A:0.973684  | AT:0.0263158 |
| chr28 | 11851192 | 2 | 34 | A:0.705882  | AAG:0.294118 |
| chr28 | 11851261 | 2 | 34 | C:0.882353  | T:0.117647   |
| chr28 | 11851340 | 2 | 36 | C:0.694444  | T:0.305556   |
| chr28 | 11851374 | 2 | 38 | CA:1        | C:0          |
| chr28 | 11851486 | 2 | 40 | G:1         | A:0          |
| chr28 | 11851525 | 2 | 38 | T:0.447368  | C:0.552632   |
| chr28 | 11851613 | 2 | 38 | C:0.815789  | T:0.184211   |
| chr28 | 11851725 | 2 | 40 | T:0.875     | C:0.125      |
| chr28 | 11851797 | 2 | 38 | T:1         | G:0          |
| chr28 | 11852005 | 2 | 40 | A:0.775     | T:0.225      |
| chr28 | 11852018 | 2 | 40 | A:0.775     | G:0.225      |
| chr28 | 11852216 | 2 | 38 | C:0.631579  | T:0.368421   |
| chr28 | 11852271 | 2 | 38 | C:0.842105  | A:0.157895   |
| chr28 | 11852326 | 2 | 36 | A:0.472222  | G:0.527778   |
| chr28 | 11852709 | 2 | 38 | T:0.710526  | C:0.289474   |
| chr28 | 11852752 | 2 | 38 | A:0.736842  | G:0.263158   |



|       |                    |   |    |                                    |                 |
|-------|--------------------|---|----|------------------------------------|-----------------|
| chr28 | 11852785           | 2 | 34 | T:0.735294                         | A:0.264706      |
| chr28 | 11853025           | 3 | 40 | CAA:0.525                          | C:0.225 CA:0.25 |
| chr28 | 11853136           | 2 | 40 | C:0.7 T:0.3                        |                 |
| chr28 | 11853296           | 2 | 40 | C:0.625 A:0.375                    |                 |
| chr28 | 11853440           | 2 | 36 | T:0.388889                         | C:0.611111      |
| chr28 | 11853526           | 2 | 38 | A:1 G:0                            |                 |
| chr28 | 11853567           | 2 | 40 | G:1 A:0                            |                 |
| chr28 | 11853933           | 2 | 40 | A:0.65 G:0.35                      |                 |
| chr28 | 11854146           | 2 | 40 | T:0.85 G:0.15                      |                 |
| chr28 | 11854209           | 2 | 38 | G:0.657895                         | A:0.342105      |
| chr28 | 11854354           | 2 | 40 | A:0.825 G:0.175                    |                 |
| chr28 | 11854391           | 2 | 40 | G:1 C:0                            |                 |
| chr28 | 11854476           | 2 | 40 | TA:0.675 T:0.325                   |                 |
| chr28 | 11854506           | 2 | 40 | C:0.625 T:0.375                    |                 |
| chr28 | 11854642           | 2 | 38 | A:0.447368                         | T:0.552632      |
| chr28 | 11854673           | 2 | 40 | T:0.7 A:0.3                        |                 |
| chr28 | 11854676           | 2 | 40 | A:0.7 T:0.3                        |                 |
| chr28 | 11854708           | 2 | 36 | C:1 A:0                            |                 |
| chr28 | 11855104           | 2 | 38 | C:0.894737                         | T:0.105263      |
| chr28 | 11855240           | 2 | 40 | TA:0.75 T:0.25                     |                 |
| chr28 | 11855243           | 2 | 40 | CTCTATTTGTATATTTTGACAATCTATTT:0.75 |                 |
|       | C:0.25             |   |    |                                    |                 |
| chr28 | 11855485           | 2 | 36 | TAA:0.916667                       | T:0.0833333     |
| chr28 | 11855489           | 2 | 36 | AAAAAATAAAATAAAAT:0.916667         |                 |
|       | A:0.0833333        |   |    |                                    |                 |
| chr28 | 11855491           | 2 | 40 | A:0.8 AT:0.2                       |                 |
| chr28 | 11855492           | 2 | 40 | AAAT:1 A:0                         |                 |
| chr28 | 11855495           | 3 | 40 | TAAAATAAAATAAAA:0.725              | T:0.075         |
|       | TAAATAAAATAAAA:0.2 |   |    |                                    |                 |
| chr28 | 11855500           | 3 | 40 | TA:1 TAAA:0 T:0                    |                 |
| chr28 | 11855501           | 2 | 40 | A:0.85 AAAT:0.15                   |                 |
| chr28 | 11855509           | 2 | 40 | A:0.8 T:0.2                        |                 |
| chr28 | 11855989           | 2 | 36 | A:0.888889                         | G:0.111111      |
| chr28 | 11856291           | 2 | 40 | G:0.675 A:0.325                    |                 |
| chr28 | 11856359           | 2 | 40 | C:0.625 A:0.375                    |                 |
| chr28 | 11856589           | 2 | 40 | T:1 C:0                            |                 |
| chr28 | 11856689           | 2 | 36 | G:0.611111                         | A:0.388889      |
| chr28 | 11856771           | 2 | 40 | A:0.65 C:0.35                      |                 |
| chr28 | 11856801           | 2 | 38 | C:0.894737                         | T:0.105263      |
| chr28 | 11856828           | 2 | 38 | C:1 T:0                            |                 |
| chr28 | 11856850           | 2 | 40 | G:1 T:0                            |                 |
| chr28 | 11856984           | 2 | 36 | C:1 T:0                            |                 |
| chr28 | 11857174           | 2 | 38 | GA:0.605263                        | G:0.394737      |
| chr28 | 11857197           | 2 | 40 | G:1 A:0                            |                 |
| chr28 | 11857306           | 2 | 38 | T:0.447368                         | A:0.552632      |
| chr28 | 11857441           | 2 | 40 | C:0.525 T:0.475                    |                 |
| chr28 | 11857656           | 2 | 38 | G:0.736842                         | A:0.263158      |
| chr28 | 11857712           | 2 | 36 | G:0.777778                         | A:0.222222      |
| chr28 | 11857887           | 2 | 40 | G:0.6 T:0.4                        |                 |
| chr28 | 11857896           | 2 | 40 | C:1 T:0                            |                 |
| chr28 | 11858000           | 2 | 40 | A:0.475 C:0.525                    |                 |
| chr28 | 11858084           | 2 | 36 | A:1 G:0                            |                 |
| chr28 | 11858194           | 2 | 38 | G:0.657895                         | T:0.342105      |
| chr28 | 11858610           | 2 | 38 | T:0.763158                         | C:0.236842      |

|                   |          |   |                       |                    |                    |              |        |
|-------------------|----------|---|-----------------------|--------------------|--------------------|--------------|--------|
| chr28             | 11858912 | 2 | 40                    | C:1                | T:0                |              |        |
| chr28             | 11859084 | 2 | 40                    | C:0.875            | A:0.125            |              |        |
| chr28             | 11859194 | 2 | 38                    | C:1                | T:0                |              |        |
| chr28             | 11859376 | 2 | 38                    | C:0.763158         |                    | T:0.236842   |        |
| chr28             | 11859705 | 2 | 38                    | ATTT:0.763158      |                    | A:0.236842   |        |
| chr28             | 11859712 | 2 | 38                    | C:1                | T:0                |              |        |
| chr28             | 11859833 | 2 | 34                    | T:0.735294         |                    | TA:0.264706  |        |
| chr28             | 11859960 | 2 | 38                    | A:0.973684         |                    | T:0.0263158  |        |
| chr28             | 11860041 | 2 | 38                    | T:0.763158         |                    | C:0.236842   |        |
| chr28             | 11860201 | 2 | 36                    | CAT:0.916667       |                    | C:0.0833333  |        |
| chr28             | 11860909 | 2 | 38                    | C:0.789474         |                    | A:0.210526   |        |
| chr28             | 11861144 | 2 | 40                    | G:1                | GTAAAA:0           |              |        |
| chr28             | 11861147 | 2 | 40                    | G:1                | GA:0               |              |        |
| chr28             | 11861148 | 2 | 40                    | T:1                | TAATCTTTTATCTAGG:0 |              |        |
| chr28             | 11861292 | 2 | 38                    | T:1                | C:0                |              |        |
| chr28             | 11861299 | 2 | 36                    | C:1                | CT:0               |              |        |
| chr28             | 11861520 | 2 | 40                    | C:0.875            | G:0.125            |              |        |
| chr28             | 11862021 | 2 | 38                    | C:0.421053         |                    | T:0.578947   |        |
| chr28             | 11862382 | 2 | 40                    | A:0.875            | G:0.125            |              |        |
| chr28             | 11862419 | 2 | 40                    | G:0.675            | T:0.325            |              |        |
| chr28             | 11862432 | 2 | 40                    | A:0.975            | C:0.025            |              |        |
| chr28             | 11862474 | 2 | 40                    | A:0.95             | G:0.05             |              |        |
| chr28             | 11862665 | 2 | 40                    | GA:1               | G:0                |              |        |
| chr28             | 11862708 | 2 | 38                    | TG:0.868421        |                    | T:0.131579   |        |
| chr28             | 11862852 | 2 | 40                    | A:0.5              | G:0.5              |              |        |
| chr28             | 11863064 | 2 | 38                    | G:1                | C:0                |              |        |
| chr28             | 11863087 | 2 | 38                    | G:0.552632         |                    | A:0.447368   |        |
| chr28             | 11863317 | 2 | 40                    | TCAA:0.725         |                    | T:0.275      |        |
| chr28             | 11863409 | 5 | 38                    | AAG:0.657895       |                    | A:0.236842   |        |
| AAGAGAG:0.0263158 |          |   | AAGAGAGAG:0.0263158   |                    |                    | AAGAGAGAGAG: |        |
| 0.0526316         |          |   |                       |                    |                    |              |        |
| chr28             | 11863543 | 2 | 40                    | T:0.5              | G:0.5              |              |        |
| chr28             | 11863601 | 2 | 40                    | C:0.7              | A:0.3              |              |        |
| chr28             | 11863735 | 2 | 40                    | C:0.9              | T:0.1              |              |        |
| chr28             | 11863841 | 2 | 40                    | C:0.875            | T:0.125            |              |        |
| chr28             | 11863912 | 2 | 40                    | T:0.9              | C:0.1              |              |        |
| chr28             | 11864152 | 2 | 36                    | A:0.888889         |                    | G:0.111111   |        |
| chr28             | 11864492 | 2 | 38                    | A:0.789474         |                    | G:0.210526   |        |
| chr28             | 11864653 | 2 | 40                    | A:1                | T:0                |              |        |
| chr28             | 11864859 | 2 | 40                    | C:0.5              | CCT:0.5            |              |        |
| chr28             | 11865229 | 2 | 40                    | T:0.5              | C:0.5              |              |        |
| chr28             | 11865376 | 2 | 36                    | C:0.666667         |                    | G:0.333333   |        |
| chr28             | 11865467 | 2 | 32                    | TAGA:0.46875       |                    | T:0.53125    |        |
| chr28             | 11865607 | 4 | 40                    | C:0.55             | CTGTGTG:0.175      |              |        |
| CTGTGTGTGTG:0.15  |          |   | CTGTGTGTGTGTGTG:0.125 |                    |                    |              |        |
| chr28             | 11865639 | 2 | 40                    | C:0.875            | G:0.125            |              |        |
| chr28             | 11865677 | 2 | 40                    | A:0.55             | AAATG:0.45         |              |        |
| chr28             | 11865679 | 2 | 38                    | ATAAATAAG:0.894737 |                    | A:           |        |
| 0.105263          |          |   |                       |                    |                    |              |        |
| chr28             | 11865687 | 2 | 40                    | G:0.55             | A:0.45             |              |        |
| chr28             | 11865692 | 3 | 40                    | CAAAT:0.55         |                    | C:0          | TAAAT: |
| 0.45              |          |   |                       |                    |                    |              |        |
| chr28             | 11865704 | 4 | 40                    | T:0.55             | TAAATA:0.125       |              |        |
| TAAATAAATA:0.075  |          |   | TAAATAAATAAATA:0.25   |                    |                    |              |        |

|                                                 |          |   |    |              |             |                 |
|-------------------------------------------------|----------|---|----|--------------|-------------|-----------------|
| chr28                                           | 11865794 | 2 | 38 | C:1          | T:0         |                 |
| chr28                                           | 11866188 | 2 | 40 | T:1          | C:0         |                 |
| chr28                                           | 11866467 | 2 | 40 | G:0.45       | A:0.55      |                 |
| chr28                                           | 11866651 | 2 | 40 | C:0.4        | G:0.6       |                 |
| chr28                                           | 11866749 | 2 | 38 | G:0.657895   |             | GA:0.342105     |
| chr28                                           | 11866946 | 2 | 38 | ATTAAT:1     | A:0         |                 |
| chr28                                           | 11866955 | 2 | 38 | A:0.789474   |             | ATTTAT:0.210526 |
| chr28                                           | 11867008 | 2 | 38 | C:0.842105   |             | T:0.157895      |
| chr28                                           | 11867265 | 2 | 36 | C:1          | A:0         |                 |
| chr28                                           | 11867606 | 2 | 40 | C:0.85       | T:0.15      |                 |
| chr28                                           | 11867663 | 2 | 38 | A:0.868421   |             | C:0.131579      |
| chr28                                           | 11867677 | 2 | 36 | C:0.805556   |             | T:0.194444      |
| chr28                                           | 11868484 | 2 | 40 | ATATACT:1    |             | A:0             |
| chr28                                           | 11868566 | 2 | 36 | T:1          | C:0         |                 |
| chr28                                           | 11868609 | 2 | 36 | G:1          | A:0         |                 |
| chr28                                           | 11868894 | 2 | 40 | T:0.675      | TG:0.325    |                 |
| chr28                                           | 11868900 | 2 | 40 | ATC:0.675    |             | A:0.325         |
| chr28                                           | 11868905 | 2 | 40 | T:0.675      |             |                 |
| TCAGACCATGAGGTATATCAAATTAGATGTGGCA:0.325        |          |   |    |              |             |                 |
| chr28                                           | 11869415 | 2 | 36 | G:1          | A:0         |                 |
| chr28                                           | 11869471 | 2 | 38 | C:0.5        | T:0.5       |                 |
| chr28                                           | 11869604 | 2 | 36 | C:1          | G:0         |                 |
| chr28                                           | 11869666 | 2 | 34 | A:0.911765   |             | AT:0.0882353    |
| chr28                                           | 11869801 | 2 | 38 | CT:0.368421  |             | C:0.631579      |
| chr28                                           | 11869826 | 2 | 38 | C:1          | T:0         |                 |
| chr28                                           | 11869857 | 2 | 38 | A:0.894737   |             | C:0.105263      |
| chr28                                           | 11870017 | 2 | 36 | A:0.666667   |             | AT:0.333333     |
| chr28                                           | 11870084 | 2 | 36 | T:0.888889   |             | C:0.111111      |
| chr28                                           | 11870558 | 2 | 40 | CA:0.525     | C:0.475     |                 |
| chr28                                           | 11870749 | 2 | 38 | T:0.684211   |             | TC:0.315789     |
| chr28                                           | 11870751 | 2 | 38 | C:0.973684   |             | CG:0.0263158    |
| chr28                                           | 11870758 | 4 | 38 | C:0.894737   |             | CAA:0.0526316   |
| CCCAA:0.0263158 CCCCAA:0.0263158                |          |   |    |              |             |                 |
| chr28                                           | 11870817 | 2 | 34 | G:0.852941   |             | A:0.147059      |
| chr28                                           | 11870859 | 2 | 38 | G:1          | A:0         |                 |
| chr28                                           | 11871195 | 2 | 40 | G:1          | A:0         |                 |
| chr28                                           | 11871288 | 2 | 36 | A:0.916667   |             | G:0.0833333     |
| chr28                                           | 11871939 | 2 | 40 | C:0.625      | CAAAA:0.375 |                 |
| chr28                                           | 11871970 | 2 | 40 | G:0.9        | A:0.1       |                 |
| chr28                                           | 11872004 | 2 | 40 | G:0.45       | T:0.55      |                 |
| chr28                                           | 11872102 | 3 | 36 | GTT:0.527778 |             | G:0.0833333     |
| GTTT:0.388889                                   |          |   |    |              |             |                 |
| chr28                                           | 11872114 | 2 | 36 | T:1          | A:0         |                 |
| chr28                                           | 11872115 | 3 | 36 | T:0.888889   |             | A:0.0277778     |
| TAAA:0.0833333                                  |          |   |    |              |             |                 |
| chr28                                           | 11872116 | 2 | 36 | A:0.611111   |             | T:0.388889      |
| chr28                                           | 11872293 | 4 | 40 | GTT:0.45     | G:0.475     | GT:0.025        |
| GTTT:0.05                                       |          |   |    |              |             |                 |
| chr28                                           | 11872329 | 2 | 40 | C:0.55       | G:0.45      |                 |
| chr28                                           | 11872333 | 2 | 40 | C:1          | T:0         |                 |
| chr28                                           | 11872600 | 2 | 40 | G:0.55       | GA:0.45     |                 |
| chr28                                           | 11873067 | 2 | 40 | A:0.7        | AGT:0.3     |                 |
| chr28                                           | 11873070 | 4 | 40 | A:0.45       | ATAG:0.025  |                 |
| ATAGTATAGTATAG:0.275 ATATAGTATAGTATAGTATAG:0.25 |          |   |    |              |             |                 |

|       |          |   |    |                   |                  |
|-------|----------|---|----|-------------------|------------------|
| chr28 | 11873397 | 2 | 38 | T:0.447368        | C:0.552632       |
| chr28 | 11873413 | 2 | 36 | C:1 T:0           |                  |
| chr28 | 11873422 | 2 | 38 | T:0.447368        | C:0.552632       |
| chr28 | 11873476 | 2 | 38 | G:1 A:0           |                  |
| chr28 | 11873785 | 2 | 40 | A:1 G:0           |                  |
| chr28 | 11873991 | 2 | 40 | T:0.725 A:0.275   |                  |
| chr28 | 11874303 | 2 | 36 | A:0.833333        | C:0.166667       |
| chr28 | 11874403 | 2 | 38 | T:0.473684        | TC:0.526316      |
| chr28 | 11874613 | 2 | 36 | C:0.722222        | T:0.277778       |
| chr28 | 11874662 | 2 | 40 | C:0.45 G:0.55     |                  |
| chr28 | 11874841 | 2 | 38 | G:0.868421        | A:0.131579       |
| chr28 | 11874853 | 2 | 40 | T:1 C:0           |                  |
| chr28 | 11875008 | 2 | 36 | CA:0.75 C:0.25    |                  |
| chr28 | 11875013 | 2 | 40 | A:0.925 AAC:0.075 |                  |
| chr28 | 11875034 | 2 | 40 | AC:0.975 A:0.025  |                  |
| chr28 | 11875039 | 2 | 40 | AC:0.975 A:0.025  |                  |
| chr28 | 11875040 | 3 | 40 | C:0.975 A:0.025   | CAAA:0           |
| chr28 | 11875046 | 2 | 40 | ACC:0.75 A:0.25   |                  |
| chr28 | 11875047 | 2 | 40 | C:0.85 A:0.15     |                  |
| chr28 | 11875048 | 3 | 40 | C:0.825 CAAA:0    | CAAAAAAAAA:0.175 |
| chr28 | 11875329 | 2 | 40 | C:0.9 CT:0.1      |                  |
| chr28 | 11875353 | 2 | 40 | G:0.5 C:0.5       |                  |
| chr28 | 11875472 | 2 | 36 | G:0.833333        | A:0.166667       |
| chr28 | 11875746 | 2 | 40 | G:1 A:0           |                  |
| chr28 | 11875928 | 2 | 40 | A:0.95 G:0.05     |                  |
| chr28 | 11876735 | 2 | 40 | C:0.725 T:0.275   |                  |
| chr28 | 11876758 | 2 | 40 | A:0.95 AT:0.05    |                  |
| chr28 | 11876893 | 2 | 36 | A:0.805556        | AT:0.194444      |
| chr28 | 11877045 | 2 | 36 | T:0.666667        | C:0.333333       |
| chr28 | 11877356 | 2 | 40 | T:0.7 C:0.3       |                  |
| chr28 | 11877566 | 2 | 38 | C:1 T:0           |                  |
| chr28 | 11877714 | 2 | 38 | A:1 G:0           |                  |
| chr28 | 11877788 | 2 | 40 | AT:0.75 A:0.25    |                  |
| chr28 | 11877919 | 2 | 38 | G:0.815789        | A:0.184211       |
| chr28 | 11878099 | 2 | 40 | C:0.75 T:0.25     |                  |
| chr28 | 11878140 | 2 | 40 | T:1 C:0           |                  |
| chr28 | 11878157 | 2 | 38 | A:0.526316        | G:0.473684       |
| chr28 | 11878380 | 2 | 40 | C:0.775 T:0.225   |                  |
| chr28 | 11878898 | 2 | 40 | TC:0.9 T:0.1      |                  |
| chr28 | 11878899 | 2 | 40 | C:0.85 T:0.15     |                  |
| chr28 | 11878981 | 2 | 36 | A:1 G:0           |                  |
| chr28 | 11879372 | 2 | 38 | G:0.763158        | A:0.236842       |
| chr28 | 11879468 | 2 | 38 | T:0 C:1           |                  |
| chr28 | 11879520 | 2 | 36 | C:0 T:1           |                  |
| chr28 | 11879527 | 2 | 36 | C:0 T:1           |                  |
| chr28 | 11879532 | 2 | 36 | C:0 T:1           |                  |
| chr28 | 11879539 | 2 | 36 | TG:0 T:1          |                  |
| chr28 | 11879542 | 2 | 36 | G:0 GT:1          |                  |
| chr28 | 11879590 | 2 | 34 | G:0 T:1           |                  |
| chr28 | 11879696 | 2 | 32 | A:1 G:0           |                  |
| chr28 | 11879839 | 2 | 34 | TA:1 T:0          |                  |
| chr28 | 11879919 | 2 | 40 | C:0.85 T:0.15     |                  |
| chr28 | 11880140 | 2 | 40 | T:0.725 G:0.275   |                  |
| chr28 | 11880412 | 2 | 36 | AG:0 A:1          |                  |

|       |          |   |    |              |         |                          |
|-------|----------|---|----|--------------|---------|--------------------------|
| chr28 | 11880549 | 2 | 40 | AT:0.95      | A:0.05  |                          |
| chr28 | 11880555 | 2 | 40 | T:0.725      | G:0.275 |                          |
| chr28 | 11881779 | 2 | 36 | G:0.722222   |         | A:0.277778               |
| chr28 | 11881837 | 2 | 40 | C:0.675      | T:0.325 |                          |
| chr28 | 11882344 | 2 | 38 | G:0.736842   |         | T:0.263158               |
| chr28 | 11882615 | 2 | 38 | T:0.684211   |         | C:0.315789               |
| chr28 | 11883074 | 2 | 40 | G:1          | C:0     |                          |
| chr28 | 11883409 | 2 | 40 | G:0.675      | A:0.325 |                          |
| chr28 | 11883866 | 2 | 38 | G:1          | T:0     |                          |
| chr28 | 11883981 | 2 | 40 | T:0.775      | A:0.225 |                          |
| chr28 | 11884006 | 2 | 40 | G:1          | T:0     |                          |
| chr28 | 11884147 | 2 | 40 | G:0.65       | A:0.35  |                          |
| chr28 | 11884208 | 2 | 40 | C:1          | T:0     |                          |
| chr28 | 11884563 | 2 | 38 | A:0.473684   |         | G:0.526316               |
| chr28 | 11885008 | 2 | 38 | G:0.763158   |         | A:0.236842               |
| chr28 | 11885048 | 2 | 40 | C:1          | T:0     |                          |
| chr28 | 11885990 | 2 | 38 | C:0.763158   |         | T:0.236842               |
| chr28 | 11886152 | 2 | 34 | GAT:0.970588 |         | G:0.0294118              |
| chr28 | 11886155 | 2 | 34 | C:0.970588   |         | CA:0.0294118             |
| chr28 | 11886315 | 2 | 40 | ATTT:0.725   |         | A:0.275                  |
| chr28 | 11886318 | 3 | 40 | T:0.675      | A:0.05  | TAAAAAAAAAAAAA:<br>0.275 |
| chr28 | 11886414 | 2 | 40 | G:0.675      | A:0.325 |                          |
| chr28 | 11886615 | 2 | 40 | G:0.475      | T:0.525 |                          |
| chr28 | 11887045 | 2 | 38 | T:0.5        | TA:0.5  |                          |
| chr28 | 11887409 | 2 | 38 | T:0.763158   |         | C:0.236842               |
| chr28 | 11887582 | 2 | 38 | G:0.684211   |         | A:0.315789               |
| chr28 | 11887973 | 2 | 38 | C:1          | T:0     |                          |
| chr28 | 11888154 | 2 | 40 | C:0.45       | T:0.55  |                          |
| chr28 | 11888210 | 2 | 38 | G:1          | A:0     |                          |
| chr28 | 11888556 | 2 | 38 | C:0.736842   |         | G:0.263158               |
| chr28 | 11888695 | 2 | 40 | C:1          | A:0     |                          |
| chr28 | 11889398 | 2 | 36 | C:0.722222   |         | T:0.277778               |
| chr28 | 11889609 | 2 | 38 | G:1          | A:0     |                          |
| chr28 | 11890634 | 2 | 36 | G:1          | T:0     |                          |
| chr28 | 11890884 | 2 | 40 | A:0.975      | G:0.025 |                          |
| chr28 | 11891477 | 2 | 38 | C:0.552632   |         | G:0.447368               |
| chr28 | 11891523 | 2 | 38 | A:1          | G:0     |                          |
| chr28 | 11891537 | 2 | 40 | C:0.725      | T:0.275 |                          |
| chr28 | 11892124 | 2 | 40 | G:0.9        | C:0.1   |                          |
| chr28 | 11892190 | 2 | 40 | C:1          | T:0     |                          |
| chr28 | 11892692 | 2 | 38 | AG:1         | A:0     |                          |
| chr28 | 11892694 | 2 | 38 | C:1          | T:0     |                          |
| chr28 | 11893064 | 2 | 38 | A:0.710526   |         | G:0.289474               |
| chr28 | 11893084 | 2 | 38 | G:1          | C:0     |                          |
| chr28 | 11893095 | 2 | 38 | C:1          | A:0     |                          |
| chr28 | 11893182 | 2 | 38 | GA:0.447368  |         | G:0.552632               |
| chr28 | 11893201 | 2 | 38 | G:0.473684   |         | A:0.526316               |
| chr28 | 11893257 | 2 | 38 | A:0.5        | G:0.5   |                          |
| chr28 | 11893458 | 2 | 36 | G:0.666667   |         | C:0.333333               |
| chr28 | 11893603 | 2 | 38 | C:1          | T:0     |                          |
| chr28 | 11894628 | 2 | 38 | C:0.447368   |         | T:0.552632               |
| chr28 | 11895309 | 2 | 36 | T:0.361111   |         | C:0.638889               |
| chr28 | 11896364 | 2 | 40 | C:1          | T:0     |                          |

|       |                          |    |                         |              |
|-------|--------------------------|----|-------------------------|--------------|
| chr28 | 11897117 2               | 40 | TCCTAAGC:0.975          | T:0.025      |
| chr28 | 11897146 2               | 40 | A:1 G:0                 |              |
| chr28 | 11897231 2               | 38 | T:0.736842              | G:0.263158   |
| chr28 | 11897412 2               | 34 | AT:1 A:0                |              |
| chr28 | 11897471 2               | 38 | C:1 T:0                 |              |
| chr28 | 11897491 2               | 38 | A:1 C:0                 |              |
| chr28 | 11897718 2               | 36 | G:1 A:0                 |              |
| chr28 | 11897838 2               | 40 | A:0.5 T:0.5             |              |
| chr28 | 11898077 2               | 38 | C:1 T:0                 |              |
| chr28 | 11898115 2               | 36 | C:1 T:0                 |              |
| chr28 | 11898121 2               | 40 | AATATATATATATATATAT:0.4 | A:0.6        |
| chr28 | 11898593 2               | 32 | ATG:1 A:0               |              |
| chr28 | 11898597 3               | 40 | G:0.7 GTA:0.2           | GTATA:0.1    |
| chr28 | 11898767 2               | 40 | G:0.75 A:0.25           |              |
| chr28 | 11898859 2               | 40 | G:1 A:0                 |              |
| chr28 | 11899659 2               | 38 | G:0.736842              | A:0.263158   |
| chr28 | 11899683 2               | 38 | A:1 G:0                 |              |
| chr28 | 11899909 2               | 40 | A:1 T:0                 |              |
| chr28 | 11900076 2               | 40 | G:1 A:0                 |              |
| chr28 | 11900354 2               | 40 | A:0.925 T:0.075         |              |
| chr28 | 11900702 2               | 38 | C:1 CT:0                |              |
| chr28 | 11900739 2               | 38 | CT:1 C:0                |              |
| chr28 | 11900952 4               | 36 | GAAA:0.527778           | G:0 GAA:     |
|       | 0.194444 GAAAAA:0.277778 |    |                         |              |
| chr28 | 11900971 2               | 36 | A:1 T:0                 |              |
| chr28 | 11901038 2               | 32 | T:0.71875               | G:0.28125    |
| chr28 | 11901103 4               | 38 | C:0.868421              | CCT:0.131579 |
|       | CCTCT:0 CCTCTCT:0        |    |                         |              |
| chr28 | 11901139 2               | 38 | AAAT:1 A:0              |              |
| chr28 | 11901142 2               | 38 | T:0.868421              | TA:0.131579  |
| chr28 | 11901145 2               | 38 | A:1 ATT:0               |              |
| chr28 | 11901490 2               | 38 | G:1 C:0                 |              |
| chr28 | 11901529 2               | 40 | G:1 A:0                 |              |
| chr28 | 11901609 2               | 34 | G:0.264706              | A:0.735294   |
| chr28 | 11901648 2               | 36 | T:0 C:1                 |              |
| chr28 | 11901796 2               | 38 | C:0.263158              | T:0.736842   |
| chr28 | 11901801 2               | 38 | A:0 T:1                 |              |
| chr28 | 11902561 2               | 40 | G:0.775 A:0.225         |              |
| chr28 | 11902834 2               | 40 | A:0 G:1                 |              |
| chr28 | 11902875 2               | 40 | T:0.8 TTTTCTTTC:0.2     |              |
| chr28 | 11903577 2               | 36 | G:1 A:0                 |              |
| chr28 | 11904397 2               | 38 | A:0.736842              | G:0.263158   |
| chr28 | 11904411 2               | 38 | G:0.736842              | GA:0.263158  |
| chr28 | 11904423 2               | 38 | T:0.736842              | TG:0.263158  |
| chr28 | 11904429 2               | 38 | A:0.473684              | G:0.526316   |
| chr28 | 11904966 2               | 36 | T:0.694444              | G:0.305556   |
| chr28 | 11905046 2               | 40 | A:0.725 G:0.275         |              |
| chr28 | 11905088 2               | 40 | A:1 AT:0                |              |
| chr28 | 11905201 2               | 38 | C:0 G:1                 |              |
| chr28 | 11905204 2               | 38 | C:0.973684              | T:0.0263158  |
| chr28 | 11905287 2               | 40 | T:0.2 A:0.8             |              |
| chr28 | 11905538 2               | 38 | G:0.210526              | A:0.789474   |
| chr28 | 11905562 2               | 38 | C:0.815789              | A:0.184211   |
| chr28 | 11905567 2               | 38 | G:0.815789              | A:0.184211   |

|       |          |   |    |              |                          |                 |
|-------|----------|---|----|--------------|--------------------------|-----------------|
| chr28 | 11905695 | 2 | 38 | T:1          | A:0                      |                 |
| chr28 | 11905737 | 2 | 40 | GA:1         | G:0                      |                 |
| chr28 | 11905896 | 2 | 40 | AAC:0.75     | A:0.25                   |                 |
| chr28 | 11905908 | 2 | 38 | C:0.263158   |                          | A:0.736842      |
| chr28 | 11906048 | 2 | 40 | G:0.775      | C:0.225                  |                 |
| chr28 | 11906064 | 2 | 40 | T:0          | G:1                      |                 |
| chr28 | 11906235 | 2 | 36 | C:0.777778   |                          | A:0.222222      |
| chr28 | 11906252 | 2 | 36 | A:0.777778   |                          | T:0.222222      |
| chr28 | 11906403 | 2 | 38 | A:1          | G:0                      |                 |
| chr28 | 11906470 | 2 | 40 | A:0.8        | G:0.2                    |                 |
| chr28 | 11906582 | 2 | 36 | G:1          | C:0                      |                 |
| chr28 | 11906587 | 2 | 38 | A:0.763158   |                          | G:0.236842      |
| chr28 | 11906709 | 2 | 40 | A:0.75       | G:0.25                   |                 |
| chr28 | 11906993 | 2 | 40 | T:0.775      | C:0.225                  |                 |
| chr28 | 11907074 | 2 | 38 | T:0.736842   |                          | TC:0.263158     |
| chr28 | 11907188 | 2 | 38 | C:1          | T:0                      |                 |
| chr28 | 11907338 | 2 | 40 | AC:0.725     | A:0.275                  |                 |
| chr28 | 11907340 | 2 | 40 | A:0.725      | T:0.275                  |                 |
| chr28 | 11907516 | 2 | 40 | T:1          | C:0                      |                 |
| chr28 | 11907594 | 2 | 40 | G:0.225      | A:0.775                  |                 |
| chr28 | 11907854 | 2 | 38 | GAAC:0       | G:1                      |                 |
| chr28 | 11908150 | 2 | 40 | T:0.875      | A:0.125                  |                 |
| chr28 | 11908333 | 2 | 38 | A:0.315789   |                          | G:0.684211      |
| chr28 | 11908483 | 2 | 38 | A:0.736842   |                          | C:0.263158      |
| chr28 | 11908607 | 2 | 38 | A:0.657895   |                          | G:0.342105      |
| chr28 | 11908661 | 2 | 38 | CT:1         | C:0                      |                 |
| chr28 | 11908670 | 2 | 40 | TA:0.875     | T:0.125                  |                 |
| chr28 | 11908671 | 2 | 40 | A:0.875      | T:0.125                  |                 |
| chr28 | 11908792 | 2 | 38 | C:0.657895   |                          | T:0.342105      |
| chr28 | 11908821 | 2 | 40 | C:0.65       | G:0.35                   |                 |
| chr28 | 11908827 | 2 | 40 | C:0.65       | T:0.35                   |                 |
| chr28 | 11909091 | 2 | 38 | C:0.736842   |                          | T:0.263158      |
| chr28 | 11909359 | 2 | 36 | G:0.972222   |                          | GTGAA:0.0277778 |
| chr28 | 11909966 | 2 | 38 | TGA:0.631579 |                          | T:0.368421      |
| chr28 | 11910739 | 2 | 40 | C:0.575      | CAAATATAAAAAAATATAAAAAA: |                 |
|       |          |   |    |              |                          | 0.425           |
| chr28 | 11910742 | 2 | 40 | C:0.575      | CAAAAAAT:0.425           |                 |
| chr28 | 11910910 | 2 | 40 | G:0.275      | C:0.725                  |                 |
| chr28 | 11911220 | 2 | 40 | CTG:1        | C:0                      |                 |
| chr28 | 11911433 | 2 | 36 | G:0.333333   |                          | T:0.666667      |
| chr28 | 11911657 | 2 | 38 | C:1          | T:0                      |                 |
| chr28 | 11912001 | 3 | 34 | CTT:0.794118 |                          | C:0 CT:         |
|       |          |   |    |              |                          | 0.205882        |
| chr28 | 11912002 | 2 | 36 | T:0.861111   |                          | TC:0.138889     |
| chr28 | 11912028 | 2 | 32 | C:0.375      | T:0.625                  |                 |
| chr28 | 11912031 | 2 | 32 | T:0.375      | C:0.625                  |                 |
| chr28 | 11912299 | 2 | 40 | C:1          | T:0                      |                 |
| chr28 | 11912379 | 2 | 40 | G:0.875      | GTC:0.125                |                 |
| chr28 | 11912395 | 2 | 40 | C:1          | G:0                      |                 |
| chr28 | 11912418 | 2 | 40 | TAAA:0.925   |                          | T:0.075         |
| chr28 | 11912629 | 2 | 40 | A:0.725      | G:0.275                  |                 |
| chr28 | 11912867 | 2 | 40 | T:1          | C:0                      |                 |
| chr28 | 11912928 | 2 | 40 | A:0.775      | C:0.225                  |                 |
| chr28 | 11912964 | 2 | 38 | T:0.5        | TTGA:0.5                 |                 |

|       |          |   |    |                            |                       |
|-------|----------|---|----|----------------------------|-----------------------|
| chr28 | 11913368 | 2 | 38 | T:0.263158                 | A:0.736842            |
| chr28 | 11913502 | 2 | 38 | T:0.236842                 | A:0.763158            |
| chr28 | 11913526 | 2 | 40 | C:0.25 T:0.75              |                       |
| chr28 | 11913869 | 2 | 38 | C:0.736842                 | T:0.263158            |
| chr28 | 11914247 | 2 | 40 | A:0.325 T:0.675            |                       |
| chr28 | 11914547 | 2 | 40 | CTTT:0.85                  | C:0.15                |
| chr28 | 11914566 | 3 | 40 | TAAG:0.775                 | T:0.075 AAAG:<br>0.15 |
| chr28 | 11914575 | 2 | 36 | T:0.333333                 | C:0.666667            |
| chr28 | 11914582 | 2 | 36 | T:0.333333                 | TAGAC:0.666667        |
| chr28 | 11914621 | 2 | 36 | C:0.722222                 | G:0.277778            |
| chr28 | 11914627 | 2 | 36 | T:0.722222                 | C:0.277778            |
| chr28 | 11914642 | 2 | 36 | C:0.722222                 | G:0.277778            |
| chr28 | 11914711 | 2 | 38 | C:1 T:0                    |                       |
| chr28 | 11915125 | 2 | 38 | G:0.263158                 | A:0.736842            |
| chr28 | 11915222 | 2 | 38 | CTCTTACTCTTAGACCT:0.342105 |                       |
|       |          |   |    | C:0.657895                 |                       |
| chr28 | 11915267 | 2 | 34 | T:0.264706                 | A:0.735294            |
| chr28 | 11915465 | 2 | 38 | A:0.342105                 | G:0.657895            |
| chr28 | 11915522 | 2 | 38 | G:1 T:0                    |                       |
| chr28 | 11915639 | 2 | 36 | G:0.277778                 | A:0.722222            |
| chr28 | 11915812 | 2 | 38 | G:0.263158                 | A:0.736842            |
| chr28 | 11915856 | 2 | 40 | T:0.8 A:0.2                |                       |
| chr28 | 11916054 | 2 | 34 | A:0.205882                 | G:0.794118            |
| chr28 | 11916275 | 2 | 36 | G:1 A:0                    |                       |
| chr28 | 11916371 | 2 | 36 | T:0.555556                 | G:0.444444            |
| chr28 | 11916624 | 2 | 38 | C:1 T:0                    |                       |
| chr28 | 11916653 | 2 | 38 | T:1 C:0                    |                       |
| chr28 | 11916841 | 2 | 38 | A:1 G:0                    |                       |
| chr28 | 11918348 | 2 | 14 | G:0.857143                 | A:0.142857            |
| chr28 | 11918457 | 2 | 34 | TA:0.735294                | T:0.264706            |
| chr28 | 11918523 | 2 | 34 | G:0.647059                 | GTT:0.352941          |
| chr28 | 11919089 | 2 | 38 | C:1 T:0                    |                       |
| chr28 | 11919381 | 2 | 36 | A:0.527778                 | G:0.472222            |
| chr28 | 11919506 | 3 | 40 | GGTGTGTGTGT:0.775          | G:0.2                 |
|       |          |   |    | GGTGTGTGTGT:0.025          |                       |
| chr28 | 11920706 | 2 | 38 | CT:0.789474                | C:0.210526            |
| chr28 | 11921527 | 2 | 38 | G:0.736842                 | A:0.263158            |
| chr28 | 11922160 | 2 | 40 | GA:0.925 G:0.075           |                       |
| chr28 | 11922375 | 2 | 38 | A:0.657895                 | T:0.342105            |
| chr28 | 11922483 | 2 | 38 | C:1 T:0                    |                       |
| chr28 | 11922543 | 2 | 38 | C:1 T:0                    |                       |
| chr28 | 11922905 | 2 | 40 | A:1 G:0                    |                       |
| chr28 | 11923553 | 2 | 38 | G:0.473684                 | C:0.526316            |
| chr28 | 11924130 | 2 | 40 | A:0.725 G:0.275            |                       |
| chr28 | 11924200 | 2 | 40 | G:0.675 GA:0.325           |                       |
| chr28 | 11924543 | 3 | 38 | T:0.315789                 | TA:0.394737           |
|       |          |   |    | TAA:0.289474               |                       |
| chr28 | 11924749 | 2 | 34 | C:1 T:0                    |                       |
| chr28 | 11924955 | 2 | 38 | G:1 C:0                    |                       |
| chr28 | 11925141 | 2 | 40 | C:0.8 T:0.2                |                       |
| chr28 | 11925145 | 2 | 40 | C:0.8 T:0.2                |                       |
| chr28 | 11925403 | 2 | 36 | T:0.777778                 | G:0.222222            |
| chr28 | 11925465 | 3 | 40 | TAC:0.325                  | T:0.4 TACAC:          |



|                  |                      |    |                                  |                |
|------------------|----------------------|----|----------------------------------|----------------|
| 0.275            |                      |    |                                  |                |
| chr28            | 11925618 2           | 40 | GTA:0.8 G:0.2                    |                |
| chr28            | 11926540 2           | 38 | C:1 T:0                          |                |
| chr28            | 11926790 2           | 40 | ATAT:0.85                        | A:0.15         |
| chr28            | 11927064 2           | 40 | A:1 G:0                          |                |
| chr28            | 11927120 2           | 38 | C:1 A:0                          |                |
| chr28            | 11927127 2           | 38 | G:1 A:0                          |                |
| chr28            | 11927537 2           | 40 | A:0.875 T:0.125                  |                |
| chr28            | 11927971 2           | 40 | A:0.75 G:0.25                    |                |
| chr28            | 11928193 3           | 40 | GA:0.75 G:0.05                   | GAAAA:0.2      |
| chr28            | 11928202 2           | 38 | A:0.473684                       | G:0.526316     |
| chr28            | 11928669 2           | 38 | C:1 T:0                          |                |
| chr28            | 11929228 2           | 40 | A:0.8 G:0.2                      |                |
| chr28            | 11929501 2           | 32 | A:0.28125                        | T:0.71875      |
| chr28            | 11929565 2           | 28 | T:0.642857                       | TG:0.357143    |
| chr28            | 11929912 2           | 36 | A:0.444444                       | T:0.555556     |
| chr28            | 11930389 2           | 40 | G:1 C:0                          |                |
| chr28            | 11930492 2           | 36 | A:0.666667                       | G:0.333333     |
| chr28            | 11930545 2           | 38 | G:0.131579                       | GAATA:0.868421 |
| chr28            | 11930585 2           | 36 | CT:1 C:0                         |                |
| chr28            | 11930846 2           | 40 | T:0.925 C:0.075                  |                |
| chr28            | 11931229 2           | 38 | C:1 T:0                          |                |
| chr28            | 11931810 2           | 40 | A:1 G:0                          |                |
| chr28            | 11931814 2           | 40 | C:0.825 CTAAA:0.175              |                |
| chr28            | 11932298 2           | 38 | G:0.236842                       | T:0.763158     |
| chr28            | 11932598 2           | 38 | GTATATATATATATATATATATATATATATA: |                |
| 0.710526         | G:0.289474           |    |                                  |                |
| chr28            | 11932897 2           | 24 | G:0.375 A:0.625                  |                |
| chr28            | 11933330 2           | 40 | A:1 AAAAT:0                      |                |
| chr28            | 11933512 2           | 40 | G:0.275 GT:0.725                 |                |
| chr28            | 11933888 2           | 36 | T:0.5 C:0.5                      |                |
| chr28            | 11934128 2           | 38 | C:0.736842                       | T:0.263158     |
| chr28            | 11934241 2           | 40 | T:0.75 TC:0.25                   |                |
| chr28            | 11934242 5           | 40 | T:0.5 C:0.3                      | TCTCTCTC:0.025 |
| TCTCTCTCTCTCTC:0 | TCTCTCTCTCTCTC:0.175 |    |                                  |                |
| chr28            | 11934544 2           | 40 | CAG:0.975                        | C:0.025        |
| chr28            | 11934741 2           | 40 | G:0.725 A:0.275                  |                |
| chr28            | 11935044 2           | 36 | T:0.472222                       | A:0.527778     |
| chr28            | 11935286 2           | 38 | C:0.842105                       | CA:0.157895    |
| chr28            | 11935773 2           | 38 | CCTCTCTCT:0.421053               | C:             |
| 0.578947         |                      |    |                                  |                |
| chr28            | 11936014 2           | 36 | T:0.972222                       | TA:0.0277778   |
| chr28            | 11936934 2           | 36 | T:0.527778                       | TA:0.472222    |
| chr28            | 11937093 2           | 38 | G:0.815789                       | T:0.184211     |
| chr28            | 11937180 2           | 38 | G:0.763158                       | A:0.236842     |
| chr28            | 11937363 2           | 40 | T:1 A:0                          |                |
| chr28            | 11937914 2           | 40 | T:1 TAA:0                        |                |
| chr28            | 11937922 2           | 40 | A:1 AT:0                         |                |
| chr28            | 11937923 2           | 40 | A:1 ATAT:0                       |                |
| chr28            | 11937925 3           | 40 | A:0.925 T:0.025                  | ATAT:0.05      |
| chr28            | 11937926 2           | 40 | A:0.85 AT:0.15                   |                |
| chr28            | 11937927 4           | 40 | A:0.15 T:0.25                    | AT:0.35 ATAT:  |
| 0.25             |                      |    |                                  |                |
| chr28            | 11937946 2           | 38 | A:0.473684                       | G:0.526316     |

|                    |          |               |    |                           |                   |
|--------------------|----------|---------------|----|---------------------------|-------------------|
| chr28              | 11938525 | 3             | 38 | TA:0.342105               | T:0.473684        |
| TTAAAAAAA:0.184211 |          |               |    |                           |                   |
| chr28              | 11938606 | 2             | 38 | G:1                       | A:0               |
| chr28              | 11938703 | 2             | 32 | ATTTT:0.78125             | A:0.21875         |
| chr28              | 11938709 | 2             | 32 | T:0.78125                 | TAAAAAA:0.21875   |
| chr28              | 11938710 | 2             | 34 | A:1                       | T:0               |
| chr28              | 11938757 | 5             | 40 | AAAATAAATAAATAAATAAAT:0.2 | A:0.05            |
| AAAAT:0.125        |          | AAAATAAAT:0.3 |    | AAAATAAATAAAT:0.325       |                   |
| chr28              | 11938798 | 2             | 38 | AAAT:1                    | A:0               |
| chr28              | 11938805 | 2             | 38 | TAAATAAATAAAAATA:1        | T:0               |
| chr28              | 11940234 | 2             | 38 | C:0                       | G:1               |
| chr28              | 11940662 | 2             | 36 | T:1                       | A:0               |
| chr28              | 11941067 | 2             | 30 | G:1                       | A:0               |
| chr28              | 11941333 | 3             | 38 | GA:0.578947               | G:0.236842        |
| GAA:0.184211       |          |               |    |                           |                   |
| chr28              | 11941949 | 3             | 40 | CT:0.5                    | C:0.425 CTT:0.075 |
| chr28              | 11942027 | 2             | 38 | T:0.763158                | A:0.236842        |
| chr28              | 11942083 | 2             | 36 | C:0.694444                | CT:0.305556       |
| chr28              | 11942208 | 2             | 38 | A:1                       | G:0               |
| chr28              | 11942504 | 2             | 40 | T:0.925                   | C:0.075           |
| chr28              | 11943099 | 2             | 40 | G:1                       | A:0               |
| chr28              | 11943182 | 2             | 40 | T:0.5                     | C:0.5             |
| chr28              | 11943470 | 3             | 40 | C:0.5                     | CT:0.3 CTT:0.2    |
| chr28              | 11943775 | 2             | 40 | T:1                       | C:0               |
| chr28              | 11943783 | 2             | 40 | G:1                       | T:0               |
| chr28              | 11944716 | 3             | 38 | C:0.815789                | CTATT:0.184211    |
| CTATTTATT:0        |          |               |    |                           |                   |
| chr28              | 11944733 | 2             | 38 | TA:0.394737               | T:0.605263        |
| chr28              | 11944735 | 2             | 38 | TTTATTTA:0.394737         | T:                |
| 0.605263           |          |               |    |                           |                   |
| chr28              | 11945088 | 2             | 40 | A:1                       | T:0               |
| chr28              | 11945937 | 2             | 40 | G:1                       | A:0               |
| chr28              | 11946538 | 2             | 40 | G:0.475                   | A:0.525           |
| chr28              | 11946751 | 2             | 40 | T:1                       | TG:0              |
| chr28              | 11946778 | 2             | 40 | A:0.725                   | G:0.275           |
| chr28              | 11946871 | 2             | 34 | C:1                       | T:0               |
| chr28              | 11947351 | 2             | 40 | C:0.75                    | T:0.25            |
| chr28              | 11947671 | 2             | 40 | C:0.675                   | T:0.325           |
| chr28              | 11947690 | 2             | 40 | T:0.675                   | TC:0.325          |
| chr28              | 11948105 | 2             | 40 | T:0.8                     | G:0.2             |
| chr28              | 11948372 | 2             | 36 | G:0.805556                | C:0.194444        |
| chr28              | 11948644 | 2             | 40 | T:0.875                   | C:0.125           |
| chr28              | 11949722 | 2             | 40 | C:0.775                   | T:0.225           |
| chr28              | 11949766 | 2             | 38 | G:0                       | A:1               |
| chr28              | 11952122 | 2             | 36 | TA:0.944444               | T:0.0555556       |
| chr28              | 11952170 | 2             | 40 | A:1                       | T:0               |
| chr28              | 11953056 | 2             | 38 | A:0.684211                | G:0.315789        |
| chr28              | 11953367 | 2             | 36 | A:1                       | G:0               |
| chr28              | 11953661 | 2             | 38 | T:0                       | A:1               |
| chr28              | 11953692 | 2             | 38 | AGATAGAT:0.947368         | A:                |
| 0.0526316          |          |               |    |                           |                   |
| chr28              | 11953710 | 2             | 38 | AGAT:0.894737             | A:0.105263        |
| chr28              | 11953926 | 2             | 36 | TGGGGG:0                  | T:1               |
| chr28              | 11953931 | 2             | 36 | G:0                       | GTCATT:1          |

|       |                                    |    |                 |            |                        |         |
|-------|------------------------------------|----|-----------------|------------|------------------------|---------|
| chr28 | 11953980 2                         | 34 | C:0             | G:1        |                        |         |
| chr28 | 11954267 2                         | 40 | GT:0.45         | G:0.55     |                        |         |
| chr28 | 11954676 3                         | 40 | C:0.475         | CACAT:0.25 | CACACAT:               |         |
|       | 0.275                              |    |                 |            |                        |         |
| chr28 | 11956227 2                         | 38 | T:1             | TCC:0      |                        |         |
| chr28 | 11957195 2                         | 38 | A:1             | G:0        |                        |         |
| chr28 | 11957224 2                         | 34 | G:0.823529      |            | A:0.176471             |         |
| chr28 | 11957389 2                         | 32 | GTC:0.6875      |            | G:0.3125               |         |
| chr28 | 11957443 2                         | 38 | TA:0.763158     |            | T:0.236842             |         |
| chr28 | 11957444 2                         | 38 | A:1             | T:0        |                        |         |
| chr28 | 11958561 2                         | 38 | C:1             | T:0        |                        |         |
| chr28 | 11958875 2                         | 38 | A:0.236842      |            | G:0.763158             |         |
| chr28 | 11959680 2                         | 36 | T:0             | C:1        |                        |         |
| chr28 | 11959744 2                         | 36 | C:0.638889      |            | T:0.361111             |         |
| chr28 | 11960152 2                         | 38 | C:1             | A:0        |                        |         |
| chr28 | 11960153 2                         | 38 | A:1             | G:0        |                        |         |
| chr28 | 11960190 2                         | 38 | G:0.473684      |            | C:0.526316             |         |
| chr28 | 11960659 2                         | 40 | T:0.9           | C:0.1      |                        |         |
| chr28 | 11960831 2                         | 40 | C:0.275         | T:0.725    |                        |         |
| chr28 | 11961189 4                         | 40 | TAAAA:0         | T:0.15     | TA:0.65                | TAA:0.2 |
| chr28 | 11961209 2                         | 40 | C:0.975         | T:0.025    |                        |         |
| chr28 | 11961560 2                         | 36 | A:1             | T:0        |                        |         |
| chr28 | 11961614 2                         | 40 | T:0.8           | C:0.2      |                        |         |
| chr28 | 11962378 2                         | 40 | A:0.925         | G:0.075    |                        |         |
| chr28 | 11962816 2                         | 40 | G:0.4           | T:0.6      |                        |         |
| chr28 | 11963058 2                         | 40 | A:1             | T:0        |                        |         |
| chr28 | 11963604 2                         | 40 | G:0.25          | T:0.75     |                        |         |
| chr28 | 11964129 2                         | 40 | CCCAACAGT:0.925 |            | C:0.075                |         |
| chr28 | 11964386 3                         | 38 | G:0.789474      |            | GA:0.131579            |         |
|       | GAA:0.0789474                      |    |                 |            |                        |         |
| chr28 | 11964876 2                         | 40 | A:0.825         | G:0.175    |                        |         |
| chr28 | 11965104 2                         | 40 | C:0.975         | CA:0.025   |                        |         |
| chr28 | 11966279 2                         | 40 | C:0.85          | T:0.15     |                        |         |
| chr28 | 11966965 2                         | 40 | T:1             | C:0        |                        |         |
| chr28 | 11967211 2                         | 40 | G:1             | A:0        |                        |         |
| chr28 | 11967480 2                         | 40 | C:0.725         | G:0.275    |                        |         |
| chr28 | 11967512 2                         | 40 | T:0.275         | C:0.725    |                        |         |
| chr28 | 11967802 2                         | 38 | T:1             | TA:0       |                        |         |
| chr28 | 11967808 2                         | 38 | A:0             | AT:1       |                        |         |
| chr28 | 11967885 2                         | 40 | C:0.8           | T:0.2      |                        |         |
| chr28 | 11968174 2                         | 36 | G:1             | A:0        |                        |         |
| chr28 | 11968322 2                         | 36 | C:0             | T:1        |                        |         |
| chr28 | 11968856 4                         | 38 | TAAA:0.605263   |            | T:0                    | TA:     |
|       | 0.184211 TAA:0.210526              |    |                 |            |                        |         |
| chr28 | 11969669 2                         | 36 | T:0.972222      |            | TTC:0.0277778          |         |
| chr28 | 11970830 3                         | 38 | G:0.5           | T:0.289474 | GT:                    |         |
|       | 0.210526                           |    |                 |            |                        |         |
| chr28 | 11971952 2                         | 38 | T:0             | A:1        |                        |         |
| chr28 | 11972207 2                         | 40 | CT:0.975        | C:0.025    |                        |         |
| chr28 | 11972301 2                         | 34 | G:0.794118      |            | A:0.205882             |         |
| chr28 | 11973488 2                         | 38 | T:0             | A:1        |                        |         |
| chr28 | 11973621 2                         | 40 | C:1             | T:0        |                        |         |
| chr28 | 11974765 6                         | 40 | TTTTA:0.475     |            | T:0.15                 |         |
|       | TTTTATTTA:0.075 TTTTATTTATTTA:0.05 |    |                 |            | TTTTATTTATTTATTTA:0.25 |         |

TTTTATTTATTTATTTATTTA:0

|                                     |          |   |    |              |                 |
|-------------------------------------|----------|---|----|--------------|-----------------|
| chr28                               | 11974832 | 2 | 38 | C:0.973684   | T:0.0263158     |
| chr28                               | 11975354 | 3 | 40 | CCTCTCT:0.9  | C:0.1           |
| CCTCTCTCT:0                         |          |   |    |              |                 |
| chr28                               | 11975970 | 2 | 38 | TAA:0.868421 | T:0.131579      |
| chr28                               | 11976288 | 2 | 38 | C:0.315789   | T:0.684211      |
| chr28                               | 11976388 | 2 | 34 | C:0.852941   | G:0.147059      |
| chr28                               | 11976416 | 2 | 34 | GA:0.823529  | G:0.176471      |
| chr28                               | 11977267 | 2 | 38 | A:1          | T:0             |
| chr28                               | 11977593 | 2 | 38 | TG:0.973684  | T:0.0263158     |
| chr28                               | 11977594 | 2 | 38 | G:0.684211   | T:0.315789      |
| chr28                               | 11977941 | 2 | 40 | G:0.3        | GCT:0.7         |
| chr28                               | 11978498 | 2 | 40 | C:1          | T:0             |
| chr28                               | 11978698 | 2 | 40 | C:1          | G:0             |
| chr28                               | 11979036 | 2 | 38 | C:0          | T:1             |
| chr28                               | 11979037 | 2 | 38 | T:0          | A:1             |
| chr28                               | 11979045 | 2 | 38 | G:0          | A:1             |
| chr28                               | 11979095 | 3 | 40 | C:0          | A:0.075 G:0.925 |
| chr28                               | 11979096 | 2 | 40 | G:0          | A:1             |
| chr28                               | 11979117 | 2 | 40 | C:0          | A:1             |
| chr28                               | 11979120 | 2 | 40 | TG:0         | T:1             |
| chr28                               | 11979122 | 2 | 40 | T:0          | A:1             |
| chr28                               | 11979124 | 2 | 40 | T:0          | TA:1            |
| chr28                               | 11979128 | 2 | 40 | G:0          | GA:1            |
| chr28                               | 11979294 | 2 | 34 | G:0.911765   | A:0.0882353     |
| chr28                               | 11979403 | 2 | 40 | A:0.9        | T:0.1           |
| chr28                               | 11979410 | 2 | 40 | T:0.675      | TA:0.325        |
| chr28                               | 11979466 | 2 | 40 | A:1          | G:0             |
| chr28                               | 11979565 | 2 | 36 | T:1          | G:0             |
| chr28                               | 11979783 | 2 | 36 | GA:1         | G:0             |
| chr28                               | 11979986 | 2 | 40 | T:1          | TA:0            |
| chr28                               | 11980824 | 2 | 38 | T:0.842105   | A:0.157895      |
| chr28                               | 11981157 | 2 | 36 | A:0.805556   | G:0.194444      |
| chr28                               | 11981193 | 2 | 40 | T:0.7        | C:0.3           |
| chr28                               | 11981412 | 2 | 38 | C:0.868421   | A:0.131579      |
| chr28                               | 11981521 | 2 | 34 | AT:0.294118  | A:0.705882      |
| chr28                               | 11981630 | 2 | 18 | G:0.888889   | A:0.111111      |
| chr28                               | 11981868 | 2 | 34 | T:1          | C:0             |
| chr28                               | 11981921 | 2 | 34 | G:1          | A:0             |
| chr28                               | 11982155 | 2 | 38 | C:1          | T:0             |
| chr28                               | 11982863 | 2 | 32 | TA:0.71875   | T:0.28125       |
| chr28                               | 11982967 | 2 | 40 | T:0.7        | G:0.3           |
| chr28                               | 11983015 | 2 | 36 | C:1          | T:0             |
| chr28                               | 11984094 | 4 | 40 | TA:0.75      | T:0 TAA:0.225   |
| TAAA:0.025                          |          |   |    |              |                 |
| chr28                               | 11984180 | 2 | 40 | A:0.825      | T:0.175         |
| chr28                               | 11984232 | 2 | 34 | TA:0.764706  | T:0.235294      |
| chr28                               | 11984843 | 2 | 40 | T:0.975      | C:0.025         |
| chr28                               | 11985322 | 4 | 40 | T:0.925      | TACACAC:0.05    |
| TACACACACACAC:0 TACACACACACAC:0.025 |          |   |    |              |                 |
| chr28                               | 11985341 | 2 | 40 | A:1          | ACACACG:0       |
| chr28                               | 11986832 | 2 | 38 | C:0.894737   | T:0.105263      |
| chr28                               | 11986972 | 2 | 40 | T:0.075      | G:0.925         |
| chr28                               | 11987107 | 2 | 38 | C:0.973684   | T:0.0263158     |

|       |          |   |    |                |              |      |
|-------|----------|---|----|----------------|--------------|------|
| chr28 | 11987193 | 2 | 38 | C:1            | CT:0         |      |
| chr28 | 11987203 | 3 | 38 | TAA:0.657895   | AAA:0.289474 |      |
|       |          |   |    | T:0.0526316    |              |      |
| chr28 | 11987204 | 2 | 38 | A:0.368421     | T:0.631579   |      |
| chr28 | 11987205 | 3 | 38 | A:0.315789     | T:0.631579   |      |
|       |          |   |    | ATTT:0.0526316 |              |      |
| chr28 | 11987394 | 2 | 36 | G:0.0833333    | A:0.916667   |      |
| chr28 | 11987565 | 2 | 40 | C:0.95         | G:0.05       |      |
| chr28 | 11987567 | 2 | 38 | G:0.105263     | C:0.894737   |      |
| chr28 | 11987569 | 2 | 40 | T:0.075        | G:0.925      |      |
| chr28 | 11987614 | 3 | 38 | A:0            | AC:0.973684  | AAC: |
|       |          |   |    | 0.0263158      |              |      |
| chr28 | 11987738 | 2 | 38 | G:0.894737     | A:0.105263   |      |
| chr28 | 11987792 | 2 | 40 | C:1            | T:0          |      |
| chr28 | 11987831 | 2 | 38 | CA:0.921053    | C:0.0789474  |      |
| chr28 | 11987838 | 2 | 38 | AG:1           | A:0          |      |
| chr28 | 11987939 | 2 | 38 | G:0.131579     | A:0.868421   |      |
| chr28 | 11988358 | 2 | 38 | T:0.921053     | A:0.0789474  |      |
| chr28 | 11988666 | 2 | 36 | C:0.0833333    | T:0.916667   |      |
| chr28 | 11989396 | 2 | 36 | C:0            | T:1          |      |
| chr28 | 11989706 | 2 | 38 | T:0.947368     | C:0.0526316  |      |
| chr28 | 11989779 | 2 | 38 | C:0.0789474    | T:0.921053   |      |
| chr28 | 11989837 | 2 | 38 | G:0.789474     | A:0.210526   |      |
| chr28 | 11989917 | 2 | 38 | A:0.0789474    | G:0.921053   |      |
| chr28 | 11990163 | 2 | 38 | G:0.710526     | A:0.289474   |      |
| chr28 | 11990325 | 2 | 40 | T:1            | G:0          |      |
| chr28 | 11990723 | 2 | 36 | TTGAC:1        | T:0          |      |
| chr28 | 11990918 | 2 | 38 | TTGTC:1        | T:0          |      |
| chr28 | 11990954 | 2 | 38 | A:0.947368     | T:0.0526316  |      |
| chr28 | 11991092 | 2 | 40 | C:0.95         | G:0.05       |      |
| chr28 | 11991267 | 2 | 40 | C:1            | T:0          |      |
| chr28 | 11991290 | 2 | 40 | T:1            | C:0          |      |
| chr28 | 11991416 | 2 | 38 | G:0.0789474    | A:0.921053   |      |
| chr28 | 11991771 | 2 | 40 | C:0.075        | T:0.925      |      |
| chr28 | 11992173 | 2 | 40 | A:0            | G:1          |      |
| chr28 | 11992225 | 2 | 38 | TA:0.736842    | T:0.263158   |      |
| chr28 | 11992457 | 2 | 40 | T:0.95         | C:0.05       |      |
| chr28 | 11992471 | 2 | 40 | CT:1           | C:0          |      |
| chr28 | 11992489 | 2 | 38 | C:1            | A:0          |      |
| chr28 | 11992545 | 2 | 40 | G:1            | A:0          |      |
| chr28 | 11992674 | 2 | 38 | GA:0.0789474   | G:0.921053   |      |
| chr28 | 11993152 | 2 | 40 | A:0            | G:1          |      |
| chr28 | 11993700 | 2 | 36 | A:0            | G:1          |      |
| chr28 | 11993701 | 2 | 36 | A:1            | G:0          |      |
| chr28 | 11994118 | 2 | 40 | A:1            | T:0          |      |
| chr28 | 11994154 | 2 | 40 | G:0.975        | A:0.025      |      |
| chr28 | 11995746 | 2 | 40 | T:1            | C:0          |      |
| chr28 | 11995875 | 2 | 38 | T:1            | A:0          |      |
| chr28 | 11996015 | 2 | 40 | C:1            | T:0          |      |
| chr28 | 11996842 | 2 | 40 | T:0            | C:1          |      |
| chr28 | 11996881 | 2 | 40 | C:1            | T:0          |      |
| chr28 | 11996935 | 2 | 40 | G:0            | T:1          |      |
| chr28 | 11997298 | 2 | 38 | G:1            | GA:0         |      |
| chr28 | 11997605 | 2 | 38 | C:1            | T:0          |      |

|       |            |    |            |              |
|-------|------------|----|------------|--------------|
| chr28 | 11997790 2 | 38 | G:0.973684 | GA:0.0263158 |
| chr28 | 11997824 2 | 36 | C:1 G:0    |              |
| chr28 | 11998542 2 | 38 | C:0 CT:1   |              |
| chr28 | 11998797 2 | 38 | G:0 C:1    |              |
| chr28 | 11998803 2 | 38 | G:1 A:0    |              |
| chr28 | 11999041 2 | 40 | G:1 A:0    |              |
| chr28 | 11999424 2 | 40 | G:1 T:0    |              |
