# Supplementary material for: Genome-Wide Analyses Suggest Mechanisms Involving Early B-Cell Development in Canine IgA Deficiency
Source: PubMed Central journal article supplement (PMC4520476; doi:10.1371/journal.pone.0133844), 2015-07-30
Supplement: pone.0133844.s018.pdf [file pone.0133844.s018.pdf]

**Table S8. FST values comparing dog and wolf pools in the CFA28 region**

| canfam2         |       |          |          | canfam3 |          |          | Fst               | SD                  | SNPs (N) |
|-----------------|-------|----------|----------|---------|----------|----------|-------------------|---------------------|----------|
| middle          | chr   | start    | end      | chr     | start    | end      |                   |                     |          |
| 13075594        | chr28 | 13050594 | 13100594 | chr28   | 10053171 | 10103177 | 0.210821571578906 | 0.0742238393010564  | 59       |
| 13100594        | chr28 | 13075594 | 13125594 | chr28   | 10078171 | 10128177 | 0.209639672270046 | 0.0638364531299045  | 30       |
| 13125594        | chr28 | 13100594 | 13150594 | chr28   | 10103177 | 10153177 | 0.155617804504721 | -0.410946802904633  | 56       |
| 13150594        | chr28 | 13125594 | 13175594 | chr28   | 10128177 | 10178177 | 0.150125172121944 | -0.459220029928627  | 30       |
| 13175594        | chr28 | 13150594 | 13200594 | chr28   | 10153177 | 10203177 | 0.178236373596786 | -0.21215845432284   | 67       |
| 13200594        | chr28 | 13175594 | 13225594 | chr28   | 10178177 | 10228186 | 0.192193607738807 | -0.0894921833236299 | 23       |
| 13225594        | chr28 | 13200594 | 13250594 | chr28   | 10203177 | 10253186 | 0.173378418802674 | -0.254853675540232  | 15       |
| 13275594        | chr28 | 13250594 | 13300594 | chr28   | 10253186 | 10303186 | 0.22788987550815  | 0.224232442293404   | 16       |
| 13375594        | chr28 | 13350594 | 13400594 | chr28   | 10353186 | 10403080 | 0.358499029487447 | 1.37212017663807    | 37       |
| 13400594        | chr28 | 13375594 | 13425594 | chr28   | 10378186 | 10428080 | 0.516750733423427 | 2.76295063800108    | 19       |
| <b>13425594</b> | chr28 | 13400594 | 13450594 | chr28   | 10403080 | 10453080 | 0.675983075220349 | 4.16239965432836    | 29       |
| <b>13450594</b> | chr28 | 13425594 | 13475594 | chr28   | 10428080 | 10478044 | 0.668590437640495 | 4.09742780707395    | 18       |
| 13475594        | chr28 | 13450594 | 13500594 | chr28   | 10453080 | 10503044 | 0.434254263789246 | 2.0379119807962     | 65       |
| 13500594        | chr28 | 13475594 | 13525594 | chr28   | 10478044 | 10528044 | 0.30834367911579  | 0.931318672690581   | 30       |
| 13525594        | chr28 | 13500594 | 13550594 | chr28   | 10503044 | 10553044 | 0.26392609253799  | 0.540944787947924   | 45       |
| 13550594        | chr28 | 13525594 | 13575594 | chr28   | 10528044 | 10578044 | 0.168082028453502 | -0.301402185601631  | 16       |
| 13625594        | chr28 | 13600594 | 13650594 | chr28   | 10603044 | 10653044 | 0.323017269439989 | 1.06028080006656    | 42       |
| 13650594        | chr28 | 13625594 | 13675594 | chr28   | 10628044 | 10678044 | 0.301129531008174 | 0.867915520046385   | 28       |
| 13675594        | chr28 | 13650594 | 13700594 | chr28   | 10653044 | 10703044 | 0.418925309543874 | 1.90319004115801    | 18       |
| 13725594        | chr28 | 13700594 | 13750594 | chr28   | 10703044 | 10753044 | 0.344879129674009 | 1.25241864376292    | 34       |
| 13750594        | chr28 | 13725594 | 13775594 | chr28   | 10728044 | 10778044 | 0.390265225250085 | 1.65130448625012    | 15       |
| 13775594        | chr28 | 13750594 | 13800594 | chr28   | 10753044 | 10803044 | 0.415441647225411 | 1.87257309644833    | 29       |
| 13800594        | chr28 | 13775594 | 13825594 | chr28   | 10778044 | 10828044 | 0.317689736585898 | 1.01345858714189    | 19       |
| 13825594        | chr28 | 13800594 | 13850594 | chr28   | 10803044 | 10853044 | 0.452044756021461 | 2.19426769706208    | 58       |
| 13850594        | chr28 | 13825594 | 13875594 | chr28   | 10828044 | 10878044 | 0.460718910912852 | 2.2705024455638     | 30       |
| 13875594        | chr28 | 13850594 | 13900594 | chr28   | 10853044 | 10903044 | 0.272169507172635 | 0.613393879454382   | 86       |
| 13900594        | chr28 | 13875594 | 13925594 | chr28   | 10878044 | 10928044 | 0.203600978262248 | 0.0107640414970156  | 31       |
| 13925594        | chr28 | 13900594 | 13950594 | chr28   | 10903044 | 10953044 | 0.243616238131072 | 0.362447094258531   | 42       |
| 13950594        | chr28 | 13925594 | 13975594 | chr28   | 10928044 | 10978044 | 0.247335046213539 | 0.395130670058449   | 36       |
