# Supplementary material for: Genome-Wide Analyses Suggest Mechanisms Involving Early B-Cell Development in Canine IgA Deficiency
Source: PubMed Central journal article supplement (PMC4520476; doi:10.1371/journal.pone.0133844), 2015-07-30
Supplement: pone.0133844.s019.pdf [file pone.0133844.s019.pdf]

**Table S9. Z-transformed average pooled heterozygosity in dog in the CFA28 region**

| canfam2  |       |          |          | canfam3 |          |          | avg_het           | z_score             | avg_cov          | maj  | min | SNPs (N) | position |
|----------|-------|----------|----------|---------|----------|----------|-------------------|---------------------|------------------|------|-----|----------|----------|
| middle   | chr   | start    | end      | chr     | start    | end      |                   |                     |                  |      |     |          |          |
| 13075594 | chr28 | 13050594 | 13100594 | chr28   | 10053171 | 10103177 | 0.366469978829782 | 0.546325700325171   | 19.8666666666667 | 904  | 288 | 60       | 13075594 |
| 13100594 | chr28 | 13075594 | 13125594 | chr28   | 10078171 | 10128177 | 0.391221016619011 | 0.896250300740804   | 18.8666666666667 | 415  | 151 | 30       | 13100594 |
| 13125594 | chr28 | 13100594 | 13150594 | chr28   | 10103177 | 10153177 | 0.314287812004775 | -0.191414027219057  | 18.9827586206897 | 886  | 215 | 58       | 13125594 |
| 13150594 | chr28 | 13125594 | 13175594 | chr28   | 10128177 | 10178177 | 0.33778971732596  | 0.14085061956277    | 19.3125          | 485  | 133 | 32       | 13150594 |
| 13175594 | chr28 | 13150594 | 13200594 | chr28   | 10153177 | 10203177 | 0.357606786242604 | 0.421019878771901   | 17.0958904109589 | 957  | 291 | 73       | 13175594 |
| 13200594 | chr28 | 13175594 | 13225594 | chr28   | 10178177 | 10228186 | 0.318860762336875 | -0.126762684866982  | 17.5833333333333 | 338  | 84  | 24       | 13200594 |
| 13225594 | chr28 | 13200594 | 13250594 | chr28   | 10203177 | 10253186 | 0.423106497500961 | 1.3470400515258     | 20.4             | 213  | 93  | 15       | 13225594 |
| 13275594 | chr28 | 13250594 | 13300594 | chr28   | 10253186 | 10303186 | 0.370437139862054 | 0.602412529928991   | 21.5             | 292  | 95  | 18       | 13275594 |
| 13375594 | chr28 | 13350594 | 13400594 | chr28   | 10353186 | 10403080 | 0.261714714617769 | -0.934680643044194  | 19.027027027027  | 595  | 109 | 37       | 13375594 |
| 13400594 | chr28 | 13375594 | 13425594 | chr28   | 10378186 | 10428080 | 0.170047248894986 | -2.23065463764241   | 21.3157894736842 | 367  | 38  | 19       | 13400594 |
| 13425594 | chr28 | 13400594 | 13450594 | chr28   | 10403080 | 10453080 | 0.12030612244898  | -2.93388348582496   | 24.1379310344828 | 655  | 45  | 29       | 13425594 |
| 13450594 | chr28 | 13425594 | 13475594 | chr28   | 10428080 | 10478044 | 0.142011834319527 | -2.62701301769682   | 23.8333333333333 | 396  | 33  | 18       | 13450594 |
| 13475594 | chr28 | 13450594 | 13500594 | chr28   | 10453080 | 10503044 | 0.209069121364256 | -1.67897218911004   | 17.7575757575758 | 1033 | 139 | 66       | 13475594 |
| 13500594 | chr28 | 13475594 | 13525594 | chr28   | 10478044 | 10528044 | 0.276065088757396 | -0.731798283953402  | 16.7741935483871 | 434  | 86  | 31       | 13500594 |
| 13525594 | chr28 | 13500594 | 13550594 | chr28   | 10503044 | 10553044 | 0.311538212737819 | -0.230287242677174  | 15.8723404255319 | 602  | 144 | 47       | 13525594 |
| 13550594 | chr28 | 13525594 | 13575594 | chr28   | 10528044 | 10578044 | 0.321662808641975 | -0.0871479849902305 | 16               | 230  | 58  | 18       | 13550594 |
| 13625594 | chr28 | 13600594 | 13650594 | chr28   | 10603044 | 10653044 | 0.326356372930106 | -0.0207914296798969 | 15.4565217391304 | 565  | 146 | 46       | 13625594 |
| 13650594 | chr28 | 13625594 | 13675594 | chr28   | 10628044 | 10678044 | 0.34652926410358  | 0.264408364495119   | 14.5             | 338  | 97  | 30       | 13650594 |
| 13675594 | chr28 | 13650594 | 13700594 | chr28   | 10653044 | 10703044 | 0.215312668298236 | -1.59070232807819   | 21.2777777777778 | 336  | 47  | 18       | 13675594 |
| 13725594 | chr28 | 13700594 | 13750594 | chr28   | 10703044 | 10753044 | 0.271780146482761 | -0.792377833224201  | 21.3142857142857 | 625  | 121 | 35       | 13725594 |
| 13750594 | chr28 | 13725594 | 13775594 | chr28   | 10728044 | 10778044 | 0.221508688577371 | -1.50310438819355   | 22.6             | 296  | 43  | 15       | 13750594 |
| 13775594 | chr28 | 13750594 | 13800594 | chr28   | 10753044 | 10803044 | 0.251621934550575 | -1.0773700955904    | 19.4516129032258 | 514  | 89  | 31       | 13775594 |
| 13800594 | chr28 | 13775594 | 13825594 | chr28   | 10778044 | 10828044 | 0.319305690133316 | -0.120472395841157  | 16.4761904761905 | 277  | 69  | 21       | 13800594 |
| 13825594 | chr28 | 13800594 | 13850594 | chr28   | 10803044 | 10853044 | 0.290733786112601 | -0.524415542900363  | 16.6166666666667 | 821  | 176 | 60       | 13825594 |
| 13850594 | chr28 | 13825594 | 13875594 | chr28   | 10828044 | 10878044 | 0.292053311120367 | -0.505760395386433  | 15.8064516129032 | 403  | 87  | 31       | 13850594 |
| 13875594 | chr28 | 13850594 | 13900594 | chr28   | 10853044 | 10903044 | 0.400072942223596 | 1.02139683223053    | 15.9886363636364 | 1018 | 389 | 88       | 13875594 |
| 13900594 | chr28 | 13875594 | 13925594 | chr28   | 10878044 | 10928044 | 0.398627901729511 | 1.00096717502653    | 16.7575757575758 | 401  | 152 | 33       | 13900594 |
| 13925594 | chr28 | 13900594 | 13950594 | chr28   | 10903044 | 10953044 | 0.354157421333366 | 0.372253534191471   | 17.6976744186047 | 586  | 175 | 43       | 13925594 |
| 13950594 | chr28 | 13925594 | 13975594 | chr28   | 10928044 | 10978044 | 0.348710084449603 | 0.295240311610175   | 18.6216216216216 | 534  | 155 | 37       | 13950594 |
