# Supplementary material for: Genome-Wide Analyses Suggest Mechanisms Involving Early B-Cell Development in Canine IgA Deficiency
Source: PubMed Central journal article supplement (PMC4520476; doi:10.1371/journal.pone.0133844), 2015-07-30
Supplement: pone.0133844.s020.pdf [file pone.0133844.s020.pdf]

Table S10. All GRAIL pathways from GWAS all breeds.

| Region_id               | Region                  | uncorr p-value | Genes                 | 'pyruvate' | 'lyase' | 'oocyte' | 'cycloxygenase' | 'prion' | 'dermatitis' | 'serum' | 'insulin' | 'atopic' | 'matrix' | 'ovarian' | 'pregnancy' | 'carcinoma' | 'metalloproteinase' | 'gastric' | 'complement' | 'oocytes' | 'igfbp' | 'invasion' | 'sialic' |   |
|-------------------------|-------------------------|----------------|-----------------------|------------|---------|----------|-----------------|---------|--------------|---------|-----------|----------|----------|-----------|-------------|-------------|---------------------|-----------|--------------|-----------|---------|------------|----------|---|
| <b>GERMAN SHEPHERD</b>  |                         |                |                       |            |         |          |                 |         |              |         |           |          |          |           |             |             |                     |           |              |           |         |            |          |   |
| ggsd6                   | chr8:63211755-63827575  | 0.098656727    | GSC                   |            |         | X        | X               |         |              |         |           |          |          |           | X           |             | X                   |           |              | X         |         | X          |          |   |
|                         |                         | 0.13423564     | SERPINA1              |            |         |          |                 | X       | X            |         |           | X        | X        | X         | X           | X           | X                   | X         | X            | X         |         |            | X        |   |
|                         |                         | 0.064372074    | SERPINA3              |            |         |          |                 | X       | X            |         |           |          | X        |           |             |             | X                   |           | X            | X         |         | X          | X        |   |
|                         |                         | 0.17150907     | SERPINA4              |            |         |          |                 |         |              | X       |           |          |          |           |             |             | X                   |           |              |           |         |            | X        |   |
|                         |                         | 0.18869457     | SERPINA6              |            |         |          |                 |         |              | X       | X         |          |          |           | X           | X           |                     |           | X            |           |         |            |          |   |
|                         |                         | 0.036794515    | SERPINA9              |            |         |          |                 |         |              |         |           |          |          | X         |             |             |                     |           |              |           |         |            |          |   |
|                         |                         | 0.018702784    | SERPINA12             |            |         |          |                 |         |              |         |           |          | X        |           | X           |             |                     |           |              |           |         |            |          |   |
| ggsd7                   | chr10:69072184-69174348 | 0.12005742     | FIGLA                 |            |         |          |                 |         | X            | X       |           | X        |          |           |             |             |                     |           | X            |           |         |            |          |   |
| ggsd11                  | chr23:48439474-48539474 | 0.0018217369   | GPR149                |            |         |          |                 |         |              |         |           |          | X        |           |             |             |                     |           |              |           |         |            |          |   |
| ggsd12                  | chr27:37248047-37454652 | 0.014281463    | C3AR1                 |            |         |          |                 |         | X            | X       | X         |          |          |           | X           |             | X                   |           | X            | X         |         |            |          |   |
|                         |                         | 0.15884016     | SLC2A3                | X          | X       |          |                 |         |              |         | X         |          |          |           | X           | X           |                     |           |              |           | X       |            |          |   |
| ggsd13                  | chr5:29188112-29288253  | 0.17901195     | MMP7                  |            |         |          | X               | X       | X            | X       |           |          |          | X         | X           | X           |                     |           |              |           |         |            |          |   |
|                         |                         | 0.18210673     | TMEM123               |            |         |          |                 |         |              |         |           |          |          |           |             |             |                     |           |              |           |         |            | X        |   |
| <b>GOLDEN RETRIEVER</b> |                         |                |                       |            |         |          |                 |         |              |         |           |          |          |           |             |             |                     |           |              |           |         |            |          |   |
| ggr1                    | chr6:18011946-18112312  | 0.048060378    | ALDOA                 | X          |         |          |                 |         |              |         |           |          |          |           |             |             |                     |           | X            |           |         |            |          |   |
|                         |                         | 0.12208519     | TBX6                  |            |         |          |                 |         |              |         | X         |          |          |           |             |             |                     |           |              |           |         |            |          |   |
| ggr3                    | chr26:7114611-7846707   | 0.14609796     | DIABLO                | X          |         |          |                 |         |              |         |           |          |          | X         |             | X           |                     | X         |              | X         |         |            |          |   |
|                         |                         | 0.005586012    | IL31                  |            |         |          |                 | X       | X            |         | X         | X        |          |           |             | X           |                     |           |              |           |         |            |          |   |
| ggr5                    | chr29:10808328-11803162 | 0.16904554     | CLVS1 / RLBP1L1       |            |         |          |                 |         |              |         |           |          |          |           |             |             | X                   |           |              |           |         |            |          |   |
| <b>SHAR PEI</b>         |                         |                |                       |            |         |          |                 |         |              |         |           |          |          |           |             |             |                     |           |              |           |         |            |          |   |
| gsp1                    | chr28:10446800-13077479 | 0.075472269    | MORN4 / C10orf83      |            |         |          |                 |         |              |         |           |          |          |           |             |             |                     |           | X            |           |         |            |          |   |
|                         |                         | 0.01325097     | HOGA1 / C10orf65/NPL2 | X          |         |          |                 |         | X            |         |           |          |          |           |             |             |                     |           |              |           |         |            |          |   |
|                         |                         | 0.16391053     | CHUK                  |            |         |          |                 |         |              |         | X         |          |          | X         | X           | X           |                     |           |              |           |         |            | X        |   |
|                         |                         | 0.10485278     | CPN1                  |            |         |          |                 |         | X            |         |           |          | X        |           |             |             |                     |           | X            |           |         |            |          |   |
|                         |                         | 0.10924305     | HPSE2                 |            |         |          |                 |         |              |         |           | X        |          |           |             | X           |                     | X         |              | X         |         | X          |          | X |
|                         |                         | 0.10265851     | NKX2-3                |            |         |          |                 |         | X            | X       |           |          |          |           |             |             |                     |           |              | X         |         |            |          |   |
|                         |                         | 0.17215797     | SFRP5                 |            |         |          |                 |         |              |         |           | X        | X        | X         | X           | X           | X                   |           | X            |           |         | X          |          |   |
| gsp10                   | chr7:19623829-19723829  | 0.049370844    | PTGS2                 |            | X       | X        |                 | X       |              | X       | X         | X        | X        | X         | X           | X           | X                   | X         |              |           | X       | X          |          |   |
| gsp11                   | chr7:22714328-22814328  | 0.14052058     | ASTN1                 |            |         |          |                 |         | X            |         |           |          |          |           |             |             |                     |           |              |           |         |            |          |   |
|                         |                         | 0.070564932    | PAPPA2                |            |         |          |                 |         | X            | X       |           | X        |          |           |             | X           | X                   |           | X            | X         |         | X          |          |   |
| gsp8                    | chr7:16146250-16246197  | 0.16958668     | DHX9                  |            |         |          |                 |         |              |         |           |          |          | X         |             |             |                     |           | X            |           |         |            |          |   |
|                         |                         | 0.035098271    | NPL                   | X          |         |          |                 |         |              |         |           |          |          |           |             |             |                     |           |              |           |         |            |          |   |
| <b>SUM GENES</b>        |                         |                |                       | 3          | 1       | 3        | 2               | 2       | 3            | 14      | 9         | 3        | 10       | 7         | 11          | 12          | 6                   | 8         | 10           | 6         | 2       | 9          | 1        |   |
| <b>SUM REGIONS</b>      |                         |                |                       | 3          | 1       | 3        | 2               | 2       | 3            | 8       | 7         | 3        | 7        | 6         | 5           | 7           | 5                   | 5         | 7            | 5         | 2       | 5          | 1        |   |
