# Supplementary material for: Genome-Wide Analyses Suggest Mechanisms Involving Early B-Cell Development in Canine IgA Deficiency
Source: PubMed Central journal article supplement (PMC4520476; doi:10.1371/journal.pone.0133844), 2015-07-30
Supplement: pone.0133844.s021.pdf [file pone.0133844.s021.pdf]

**Table S11. INRICH results\* from IgA associated regions**

| <b>T_Size</b> | <b>Int_No</b> | <b>Empirical_P</b> | <b>Corrected_P</b> | <b>Target</b> | <b>Description</b>                                                                                                            |
|---------------|---------------|--------------------|--------------------|---------------|-------------------------------------------------------------------------------------------------------------------------------|
| 622           | 6             | 3,00E-06           | 0.00182            | GO:0003700    | sequence-specific_DNA_binding_transcription_factor_activity                                                                   |
| 48            | 3             | 3,00E-06           | 0.00182            | GO:0032355    | response_to_estradiol_stimulus                                                                                                |
| 44            | 3             | 9.99999e-06        | 0.00556999         | GO:0001558    | regulation_of_cell_growth                                                                                                     |
| 160           | 4             | 1.1e-05            | 0.00617299         | GO:0000122    | negative_regulation_of_transcription_from_RNA_polymerase_II_promoter                                                          |
| 557           | 5             | 1.6e-05            | 0.00879199         | GO:0006355    | regulation_of_transcription,_DNA-dependent                                                                                    |
| 19            | 2             | 8.39999e-05        | 0.034121           | GO:0007015    | actin_filament_organization                                                                                                   |
| 26            | 2             | 8.49999e-05        | 0.034596           | GO:0031093    | platelet_alpha_granule_lumen                                                                                                  |
| 124           | 3             | 0.000119           | 0.045301           | GO:0005667    | transcription_factor_complex                                                                                                  |
| 37            | 2             | 0.000151           | 0.0549709          | GO:0034097    | response_to_cytokine_stimulus                                                                                                 |
| 38            | 2             | 0.000314           | 0.0893319          | GO:0016702    | oxidoreductase_activity,_acting_on_single_donors_with_incorporation_of_molecular_oxygen,_incorporation_of_two_atoms_of_oxygen |
| 52            | 2             | 0.000348           | 0.0950739          | GO:0002576    | platelet_degranulation                                                                                                        |
| 60            | 2             | 0.000428           | 0.104867           | GO:0006006    | glucose_metabolic_process                                                                                                     |
| 67            | 2             | 0.000477           | 0.10964            | GO:0016829    | lyase_activity                                                                                                                |
| 157           | 3             | 0.000547999        | 0.119056           | GO:0030168    | platelet_activation                                                                                                           |
| 64            | 2             | 0.000601999        | 0.124557           | GO:0009653    | anatomical_structure_morphogenesis                                                                                            |
| 67            | 2             | 0.000601999        | 0.124557           | GO:0032496    | response_to_lipopolysaccharide                                                                                                |
| 70            | 2             | 0.000727999        | 0.137657           | GO:0014070    | response_to_organic_cyclic_substance                                                                                          |
| 39            | 2             | 0.000805999        | 0.146665           | GO:0030097    | hemopoiesis                                                                                                                   |
| 321           | 3             | 0.001001           | 0.168941           | GO:0043565    | sequence-specific_DNA_binding                                                                                                 |
| 697           | 4             | 0.001055           | 0.172897           | GO:0005730    | nucleolus                                                                                                                     |
| 230           | 3             | 0.00111            | 0.175702           | GO:0007596    | blood_coagulation                                                                                                             |
| 583           | 4             | 0.001131           | 0.177593           | GO:0016787    | hydrolase_activity                                                                                                            |
| 79            | 2             | 0.0012             | 0.185405           | GO:0003690    | double-stranded_DNA_binding                                                                                                   |
| 56            | 2             | 0.001235           | 0.187451           | GO:0007389    | pattern_specification_process                                                                                                 |
| 51            | 2             | 0.001313           | 0.19455            | GO:0016477    | cell_migration                                                                                                                |
| 75            | 2             | 0.001655           | 0.219867           | GO:0004222    | metalloendopeptidase_activity                                                                                                 |
| 364           | 3             | 0.002442           | 0.264807           | GO:0006915    | apoptosis                                                                                                                     |
| 498           | 3             | 0.002715           | 0.281437           | GO:0005654    | nucleoplasm                                                                                                                   |
| 113           | 2             | 0.00338            | 0.307749           | GO:0005813    | centrosome                                                                                                                    |
| 499           | 3             | 0.003443           | 0.308913           | GO:0005615    | extracellular_space                                                                                                           |
| 112           | 2             | 0.00452            | 0.352829           | GO:0043234    | protein_complex                                                                                                               |
| 177           | 2             | 0.004555           | 0.35498            | GO:0005975    | carbohydrate_metabolic_process                                                                                                |
| 192           | 2             | 0.004723           | 0.359966           | GO:0030528    | transcription_regulator_activity                                                                                              |
| 80            | 2             | 0.00546999         | 0.382459           | GO:0030036    | actin_cytoskeleton_organization                                                                                               |
| 134           | 2             | 0.00593299         | 0.398216           | GO:0016568    | chromatin_modification                                                                                                        |
| 145           | 2             | 0.00613999         | 0.407546           | GO:0008134    | transcription_factor_binding                                                                                                  |
| 439           | 3             | 0.00865799         | 0.456225           | GO:0005856    | cytoskeleton                                                                                                                  |
| 106           | 2             | 0.00927499         | 0.466609           | GO:0051056    | regulation_of_small_GTPase_mediated_signal_transduction                                                                       |
| 263           | 2             | 0.011199           | 0.494678           | GO:0016491    | oxidoreductase_activity                                                                                                       |
| 166           | 2             | 0.011648           | 0.508221           | GO:0005578    | proteinaceous_extracellular_matrix                                                                                            |
| 613           | 3             | 0.012557           | 0.516034           | GO:0007275    | multicellular_organismal_development                                                                                          |
| 189           | 2             | 0.013636           | 0.521072           | GO:0007264    | small_GTPase_mediated_signal_transduction                                                                                     |
| 321           | 2             | 0.01498            | 0.529507           | GO:0055114    | oxidation-reduction_process                                                                                                   |
| 268           | 2             | 0.016238           | 0.541168           | GO:0006508    | proteolysis                                                                                                                   |
| 293           | 2             | 0.019572           | 0.577468           | GO:0008233    | peptidase_activity                                                                                                            |
| 198           | 2             | 0.020267           | 0.582399           | GO:0003779    | actin_binding                                                                                                                 |
| 301           | 2             | 0.023215           | 0.609116           | GO:0005488    | binding                                                                                                                       |
| 319           | 2             | 0.030068           | 0.638468           | GO:0030154    | cell_differentiation                                                                                                          |
| 345           | 2             | 0.030622           | 0.642941           | GO:0005575    | cellular_component                                                                                                            |
| 180           | 2             | 0.037092           | 0.676482           | GO:0045202    | synapse                                                                                                                       |
| 909           | 3             | 0.047166           | 0.706319           | GO:0005524    | ATP_binding                                                                                                                   |

\*using 1M permutations and 5-1000 genes per gene sets.
