# Supplementary material for: Genome-Wide Analyses Suggest Mechanisms Involving Early B-Cell Development in Canine IgA Deficiency
Source: PubMed Central journal article supplement (PMC4520476; doi:10.1371/journal.pone.0133844), 2015-07-30
Supplement: pone.0133844.s022.pdf [file pone.0133844.s022.pdf]

-----  
INRICH v.1.0 : Mon Dec 1 11:23:35 2014  
http://atgu.mgh.harvard.edu/inrich  
-----

project-title (-o) : 5-1000\_go\_1000Kperm\_canfam3.hg19\_gwas  
test-regions (-a) : gwasregions\_canfam3new.int  
gene-list (-g) : canfam3.hg19.genes.map  
background-genes (-b) : --no background set--  
range-file (-x) : --no ranges--  
target-file (-t) : go.test.set  
target size-filter (-i,j) : 5..1000  
min-obs threshold (-z) : 2  
test-type (-l) : INTERVALS  
top-N-regions (-n) : --all--  
kb-window (-w) : 0  
map-file (-m) : my\_markers\_canfam3.snps  
match-density (-d) : 0.1  
pre-compute (-c) : YES  
match-genes (-e) : YES  
num-replicates (-r) : 1000000  
num-bootstraps (-q) : 1000000  
random-seed (-f) : 700081734  
display-p (-p) : 0.05  
-----

1768.89Mb total sequence length on 26 chromosomes  
read 133695 map positions  
read 13878 reference genes  
read 11197 unique genes/targets, in 9086 groups  
118754 total gene/group pairs  
6549 genes/targets not found in main gene-list  
after size filters, 2684 groups remaining  
read 21 intervals  
18 test elements on gene regions  
3 non-genic test elements dropped

After merging, 11883 non-overlapping reference genes  
After merging, 10204 non-overlapping genes in target sets  
After merging, 18 non-overlapping intervals

133695 SNP counts assigned  
Precomputing acceptable positions 18  
1000000 first-pass permutations ( completed )  
1000000 second-pass permutations ( completed )

Total of 18 intervals tested for 2684 target sets

Proportion unplaced/self-placed interval/permutations = 0.000163056

-----  
T\_Size Int\_No Empirical\_P Corrected\_P Target  
-----  
160 4 1.1e-05 0.00617299 G0:0000122  
-----

|                                                                      |     |   |             |            |            |             |
|----------------------------------------------------------------------|-----|---|-------------|------------|------------|-------------|
| negative_regulation_of_transcription_from_RNA_polymerase_II_promoter | 44  | 3 | 9.99999e-06 | 0.00556999 | G0:0001558 |             |
| regulation_of_cell_growth                                            | 52  | 2 | 0.000348    | 0.0950739  | G0:0002576 |             |
| platelet_degranulation                                               | 79  | 2 | 0.0012      | 0.185405   | G0:0003690 | double-     |
| stranded_DNA_binding                                                 | 622 | 6 | 3e-06       | 0.00182    | G0:0003700 | sequence-   |
| specific_DNA_binding_transcription_factor_activity                   | 198 | 2 | 0.020267    | 0.582399   | G0:0003779 |             |
| actin_binding                                                        | 75  | 2 | 0.001655    | 0.219867   | G0:0004222 |             |
| metalloendopeptidase_activity                                        | 301 | 2 | 0.023215    | 0.609116   | G0:0005488 | binding     |
|                                                                      | 909 | 3 | 0.047166    | 0.706319   | G0:0005524 | ATP_binding |
|                                                                      | 345 | 2 | 0.030622    | 0.642941   | G0:0005575 |             |
| cellular_component                                                   | 166 | 2 | 0.011648    | 0.508221   | G0:0005578 |             |
| proteinaceous_extracellular_matrix                                   | 499 | 3 | 0.003443    | 0.308913   | G0:0005615 |             |
| extracellular_space                                                  | 498 | 3 | 0.002715    | 0.281437   | G0:0005654 | nucleoplasm |
|                                                                      | 124 | 3 | 0.000119    | 0.045301   | G0:0005667 |             |
| transcription_factor_complex                                         | 697 | 4 | 0.001055    | 0.172897   | G0:0005730 | nucleolus   |
|                                                                      | 113 | 2 | 0.00338     | 0.307749   | G0:0005813 | centrosome  |
|                                                                      | 439 | 3 | 0.00865799  | 0.456225   | G0:0005856 |             |
| cytoskeleton                                                         | 177 | 2 | 0.004555    | 0.35498    | G0:0005975 |             |
| carbohydrate_metabolic_process                                       | 60  | 2 | 0.000428    | 0.104867   | G0:0006006 |             |
| glucose_metabolic_process                                            | 557 | 5 | 1.6e-05     | 0.00879199 | G0:0006355 |             |
| regulation_of_transcription,_DNA-dependent                           | 268 | 2 | 0.016238    | 0.541168   | G0:0006508 | proteolysis |
|                                                                      | 364 | 3 | 0.002442    | 0.264807   | G0:0006915 | apoptosis   |
|                                                                      | 19  | 2 | 8.39999e-05 | 0.034121   | G0:0007015 |             |
| actin_filament_organization                                          | 189 | 2 | 0.013636    | 0.521072   | G0:0007264 |             |
| small_GTPase_mediated_signal_transduction                            | 613 | 3 | 0.012557    | 0.516034   | G0:0007275 |             |
| multicellular_organismal_development                                 | 56  | 2 | 0.001235    | 0.187451   | G0:0007389 |             |
| pattern_specification_process                                        | 230 | 3 | 0.00111     | 0.175702   | G0:0007596 |             |
| blood_coagulation                                                    | 145 | 2 | 0.00613999  | 0.407546   | G0:0008134 |             |
| transcription_factor_binding                                         | 293 | 2 | 0.019572    | 0.577468   | G0:0008233 |             |
| peptidase_activity                                                   | 64  | 2 | 0.000601999 | 0.124557   | G0:0009653 |             |
| anatomical_structure_morphogenesis                                   | 70  | 2 | 0.000727999 | 0.137657   | G0:0014070 |             |
| response_to_organic_cyclic_substance                                 |     |   |             |            |            |             |

|                                                                                                                               |   |             |           |                        |
|-------------------------------------------------------------------------------------------------------------------------------|---|-------------|-----------|------------------------|
| 51                                                                                                                            | 2 | 0.001313    | 0.19455   | G0:0016477             |
| cell_migration                                                                                                                |   |             |           |                        |
| 263                                                                                                                           | 2 | 0.011199    | 0.494678  | G0:0016491             |
| oxidoreductase_activity                                                                                                       |   |             |           |                        |
| 134                                                                                                                           | 2 | 0.00593299  | 0.398216  | G0:0016568             |
| chromatin_modification                                                                                                        |   |             |           |                        |
| 38                                                                                                                            | 2 | 0.000314    | 0.0893319 | G0:0016702             |
| oxidoreductase_activity,_acting_on_single_donors_with_incorporation_of_molecular_oxygen,_incorporation_of_two_atoms_of_oxygen |   |             |           |                        |
| 583                                                                                                                           | 4 | 0.001131    | 0.177593  | G0:0016787             |
| hydrolase_activity                                                                                                            |   |             |           |                        |
| 67                                                                                                                            | 2 | 0.000477    | 0.10964   | G0:0016829             |
| lyase_activity                                                                                                                |   |             |           |                        |
| 80                                                                                                                            | 2 | 0.00546999  | 0.382459  | G0:0030036             |
| actin_cytoskeleton_organization                                                                                               |   |             |           |                        |
| 39                                                                                                                            | 2 | 0.000805999 | 0.146665  | G0:0030097 hemopoiesis |
| 319                                                                                                                           | 2 | 0.030068    | 0.638468  | G0:0030154             |
| cell_differentiation                                                                                                          |   |             |           |                        |
| 157                                                                                                                           | 3 | 0.000547999 | 0.119056  | G0:0030168             |
| platelet_activation                                                                                                           |   |             |           |                        |
| 192                                                                                                                           | 2 | 0.004723    | 0.359966  | G0:0030528             |
| transcription_regulator_activity                                                                                              |   |             |           |                        |
| 26                                                                                                                            | 2 | 8.49999e-05 | 0.034596  | G0:0031093             |
| platelet_alpha_granule_lumen                                                                                                  |   |             |           |                        |
| 48                                                                                                                            | 3 | 3e-06       | 0.00182   | G0:0032355             |
| response_to_estradiol_stimulus                                                                                                |   |             |           |                        |
| 67                                                                                                                            | 2 | 0.000601999 | 0.124557  | G0:0032496             |
| response_to_lipopolysaccharide                                                                                                |   |             |           |                        |
| 37                                                                                                                            | 2 | 0.000151    | 0.0549709 | G0:0034097             |
| response_to_cytokine_stimulus                                                                                                 |   |             |           |                        |
| 112                                                                                                                           | 2 | 0.00452     | 0.352829  | G0:0043234             |
| protein_complex                                                                                                               |   |             |           |                        |
| 321                                                                                                                           | 3 | 0.001001    | 0.168941  | G0:0043565 sequence-   |
| specific_DNA_binding                                                                                                          |   |             |           |                        |
| 180                                                                                                                           | 2 | 0.037092    | 0.676482  | G0:0045202 synapse     |
| 106                                                                                                                           | 2 | 0.00927499  | 0.466609  | G0:0051056             |
| regulation_of_small_GTPase_mediated_signal_transduction                                                                       |   |             |           |                        |
| 321                                                                                                                           | 2 | 0.01498     | 0.529507  | G0:0055114 oxidation-  |
| reduction_process                                                                                                             |   |             |           |                        |

| Target_P_Threshold | Uniq_Gene_No_in_Targets | Significance |
|--------------------|-------------------------|--------------|
| 0.001              | 20                      | 9.99999e-07  |
| 0.01               | 36                      | 9.99999e-07  |
| 0.05               | 39                      | 9.99999e-07  |

Writing output to  
5-1000\_go\_1000Kperm\_canfam3.hg19\_gwas.out.inrich ...

---

## I. Main Analysis Results

---

| _01     | T_TARG                                                                   | N_INT | P       | PCORR      | LOW_WARN | UNSH     | TARGET     |
|---------|--------------------------------------------------------------------------|-------|---------|------------|----------|----------|------------|
| _01     | 5                                                                        | 0     | 1       | 1          | 0        | 0        | G0:        |
| 0000038 | Very_long-chain_fatty_acid_metabolic_process                             |       |         |            |          |          |            |
| _01     | 9                                                                        | 0     | 1       | 1          | 0        | 0        | G0:        |
| 0000045 | Autophagic_vacuole_assembly                                              |       |         |            |          |          |            |
| _01     | 13                                                                       | 0     | 1       | 1          | 0        | 0        | G0:        |
| 0000049 | TRNA_binding                                                             |       |         |            |          |          |            |
| _01     | 9                                                                        | 0     | 1       | 1          | 0        | 0        | G0:        |
| 0000050 | Urea_cycle                                                               |       |         |            |          |          |            |
| _01     | 14                                                                       | 0     | 1       | 1          | 0        | 0        | G0:        |
| 0000060 | Protein_import_into_nucleus,_translocation                               |       |         |            |          |          |            |
| _01     | 10                                                                       | 0     | 1       | 1          | 0        | 0        | G0:        |
| 0000062 | Acyl-CoA_binding                                                         |       |         |            |          |          |            |
| _01     | 83                                                                       | 1     | 1       | 1          | 0        | 0.000423 | G0:        |
| 0000075 | Cell_cycle_checkpoint                                                    |       |         |            |          |          |            |
| _01     | 9                                                                        | 0     | 1       | 1          | 0        | 0        | G0:        |
| 0000077 | DNA_damage_checkpoint                                                    |       |         |            |          |          |            |
| _01     | 24                                                                       | 0     | 1       | 1          | 0        | 0        | G0:        |
| 0000079 | Regulation_of_cyclin-dependent_protein_kinase_activity                   |       |         |            |          |          |            |
| _01     | 16                                                                       | 0     | 1       | 1          | 0        | 0        | G0:        |
| 0000080 | G1_phase_of_mitotic_cell_cycle                                           |       |         |            |          |          |            |
| _01     | 93                                                                       | 0     | 1       | 1          | 0        | 0        | G0:        |
| 0000082 | G1/S_transition_of_mitotic_cell_cycle                                    |       |         |            |          |          |            |
| _01     | 16                                                                       | 0     | 1       | 1          | 0        | 0        | G0:        |
| 0000083 | Regulation_of_transcription_involved_in_G1/S_phase_of_mitotic_cell_cycle |       |         |            |          |          |            |
| _01     | 74                                                                       | 0     | 1       | 1          | 0        | 0        | G0:        |
| 0000084 | S_phase_of_mitotic_cell_cycle                                            |       |         |            |          |          |            |
| _01     | 6                                                                        | 0     | 1       | 1          | 0        | 0        | G0:        |
| 0000085 | G2_phase_of_mitotic_cell_cycle                                           |       |         |            |          |          |            |
| _01     | 65                                                                       | 1     | 1       | 1          | 0        | 0.000423 | G0:        |
| 0000086 | G2/M_transition_of_mitotic_cell_cycle                                    |       |         |            |          |          |            |
| _01     | 48                                                                       | 0     | 1       | 1          | 0        | 0        | G0:        |
| 0000087 | M_phase_of_mitotic_cell_cycle                                            |       |         |            |          |          |            |
| _01     | 16                                                                       | 0     | 1       | 1          | 0        | 0        | G0:        |
| 0000118 | Histone_deacetylase_complex                                              |       |         |            |          |          |            |
| _01     | 160                                                                      | 4     | 1.1e-05 | 0.00617299 | 0        | 0.000205 | G0:0000122 |
| 0000122 | Negative_regulation_of_transcription_from_RNA_polymerase_II_promoter     |       |         |            |          |          |            |
| _01     | 5                                                                        | 0     | 1       | 1          | 0        | 0        | G0:        |
| 0000123 | Histone_acetyltransferase_complex                                        |       |         |            |          |          |            |
| _01     | 5                                                                        | 0     | 1       | 1          | 0        | 0        | G0:        |
| 0000132 | Establishment_of_mitotic_spindle_orientation                             |       |         |            |          |          |            |
| _01     | 259                                                                      | 1     | 1       | 1          | 0        | 0.000423 | G0:        |
| 0000139 | Golgi_membrane                                                           |       |         |            |          |          |            |
| _01     | 7                                                                        | 0     | 1       | 1          | 0        | 0        | G0:        |
| 0000145 | Exocyst                                                                  |       |         |            |          |          |            |
| _01     | 11                                                                       | 0     | 1       | 1          | 0        | 0        | G0:        |
| 0000146 | Microfilament_motor_activity                                             |       |         |            |          |          |            |
| _01     | 6                                                                        | 0     | 1       | 1          | 0        | 0        | G0:        |

|         |                                                                           |   |   |   |   |          |  |     |
|---------|---------------------------------------------------------------------------|---|---|---|---|----------|--|-----|
| 0000149 | SNARE_binding                                                             |   |   |   |   |          |  |     |
| _01     | 38                                                                        | 0 | 1 | 1 | 0 | 0        |  | GO: |
| 0000151 | Ubiquitin_ligase_complex                                                  |   |   |   |   |          |  |     |
| _01     | 9                                                                         | 0 | 1 | 1 | 0 | 0        |  | GO: |
| 0000155 | Two-component_sensor_activity                                             |   |   |   |   |          |  |     |
| _01     | 15                                                                        | 0 | 1 | 1 | 0 | 0        |  | GO: |
| 0000159 | Protein_phosphatase_type_2A_complex                                       |   |   |   |   |          |  |     |
| _01     | 32                                                                        | 0 | 1 | 1 | 0 | 0        |  | GO: |
| 0000165 | MAPKKK_cascade                                                            |   |   |   |   |          |  |     |
| _01     | 11                                                                        | 0 | 1 | 1 | 0 | 0        |  | GO: |
| 0000175 | 3'-5'-exoribonuclease_activity                                            |   |   |   |   |          |  |     |
| _01     | 8                                                                         | 0 | 1 | 1 | 0 | 0        |  | GO: |
| 0000178 | Exosome_(RNase_complex)                                                   |   |   |   |   |          |  |     |
| _01     | 5                                                                         | 0 | 1 | 1 | 0 | 0        |  | GO: |
| 0000183 | Chromatin_silencing_at_rDNA                                               |   |   |   |   |          |  |     |
| _01     | 23                                                                        | 0 | 1 | 1 | 0 | 0        |  | GO: |
| 0000184 | Nuclear-transcribed_mRNA_catabolic_process,_nonsense-mediated_decay       |   |   |   |   |          |  |     |
| _01     | 30                                                                        | 1 | 1 | 1 | 0 | 5e-05    |  | GO: |
| 0000186 | Activation_of_MAPKK_activity                                              |   |   |   |   |          |  |     |
| _01     | 59                                                                        | 0 | 1 | 1 | 0 | 0        |  | GO: |
| 0000187 | Activation_of_MAPK_activity                                               |   |   |   |   |          |  |     |
| _01     | 13                                                                        | 0 | 1 | 1 | 0 | 0        |  | GO: |
| 0000188 | Inactivation_of_MAPK_activity                                             |   |   |   |   |          |  |     |
| _01     | 28                                                                        | 0 | 1 | 1 | 0 | 0        |  | GO: |
| 0000209 | Protein_polyubiquitination                                                |   |   |   |   |          |  |     |
| _01     | 54                                                                        | 0 | 1 | 1 | 0 | 0        |  | GO: |
| 0000216 | M/G1_transition_of_mitotic_cell_cycle                                     |   |   |   |   |          |  |     |
| _01     | 22                                                                        | 1 | 1 | 1 | 0 | 5e-05    |  | GO: |
| 0000226 | Microtubule_cytoskeleton_organization                                     |   |   |   |   |          |  |     |
| _01     | 18                                                                        | 0 | 1 | 1 | 0 | 0        |  | GO: |
| 0000228 | Nuclear_chromosome                                                        |   |   |   |   |          |  |     |
| _01     | 44                                                                        | 0 | 1 | 1 | 0 | 0        |  | GO: |
| 0000236 | Mitotic_prometaphase                                                      |   |   |   |   |          |  |     |
| _01     | 9                                                                         | 0 | 1 | 1 | 0 | 0        |  | GO: |
| 0000242 | Pericentriolar_material                                                   |   |   |   |   |          |  |     |
| _01     | 9                                                                         | 0 | 1 | 1 | 0 | 0        |  | GO: |
| 0000245 | Spliceosome_assembly                                                      |   |   |   |   |          |  |     |
| _01     | 5                                                                         | 0 | 1 | 1 | 0 | 0        |  | GO: |
| 0000266 | Mitochondrial_fission                                                     |   |   |   |   |          |  |     |
| _01     | 193                                                                       | 1 | 1 | 1 | 0 | 0.000423 |  | GO: |
| 0000278 | Mitotic_cell_cycle                                                        |   |   |   |   |          |  |     |
| _01     | 106                                                                       | 0 | 1 | 1 | 0 | 0        |  | GO: |
| 0000287 | Magnesium_ion_binding                                                     |   |   |   |   |          |  |     |
| _01     | 32                                                                        | 0 | 1 | 1 | 0 | 0        |  | GO: |
| 0000288 | Nuclear-transcribed_mRNA_catabolic_process,_deadenylation-dependent_decay |   |   |   |   |          |  |     |
| _01     | 14                                                                        | 0 | 1 | 1 | 0 | 0        |  | GO: |
| 0000289 | Nuclear-transcribed_mRNA_poly(A)_tail_shortening                          |   |   |   |   |          |  |     |
| _01     | 11                                                                        | 0 | 1 | 1 | 0 | 0        |  | GO: |
| 0000299 | Integral_to_membrane_of_membrane_fraction                                 |   |   |   |   |          |  |     |
| _01     | 6                                                                         | 0 | 1 | 1 | 0 | 0        |  | GO: |
| 0000302 | Response_to_reactive_oxygen_species                                       |   |   |   |   |          |  |     |
| _01     | 6                                                                         | 0 | 1 | 1 | 0 | 0        |  | GO: |

|         |                                                                  |   |   |   |   |         |     |  |
|---------|------------------------------------------------------------------|---|---|---|---|---------|-----|--|
| 0000307 | Cyclin-dependent_protein_kinase_holoenzyme_complex               |   |   |   |   |         |     |  |
| _01     | 6                                                                | 0 | 1 | 1 | 0 | 0       | G0: |  |
| 0000346 | Transcription_export_complex                                     |   |   |   |   |         |     |  |
| _01     | 16                                                               | 0 | 1 | 1 | 0 | 0       | G0: |  |
| 0000375 | RNA_splicing,_via_transesterification_reactions                  |   |   |   |   |         |     |  |
| _01     | 7                                                                | 0 | 1 | 1 | 0 | 0       | G0: |  |
| 0000381 | Regulation_of_alternative_nuclear_mRNA_splicing,_via_spliceosome |   |   |   |   |         |     |  |
| _01     | 14                                                               | 0 | 1 | 1 | 0 | 0       | G0: |  |
| 0000387 | Spliceosomal_snRNP_assembly                                      |   |   |   |   |         |     |  |
| _01     | 89                                                               | 1 | 1 | 1 | 0 | 5.2e-05 | G0: |  |
| 0000398 | Nuclear_mRNA_splicing,_via_spliceosome                           |   |   |   |   |         |     |  |
| _01     | 6                                                                | 0 | 1 | 1 | 0 | 0       | G0: |  |
| 0000405 | Bubble_DNA_binding                                               |   |   |   |   |         |     |  |
| _01     | 9                                                                | 0 | 1 | 1 | 0 | 0       | G0: |  |
| 0000421 | Autophagic_vacuole_membrane                                      |   |   |   |   |         |     |  |
| _01     | 41                                                               | 0 | 1 | 1 | 0 | 0       | G0: |  |
| 0000502 | Proteasome_complex                                               |   |   |   |   |         |     |  |
| _01     | 12                                                               | 0 | 1 | 1 | 0 | 0       | G0: |  |
| 0000718 | Nucleotide_excision_repair,_DNA_damage_removal                   |   |   |   |   |         |     |  |
| _01     | 14                                                               | 0 | 1 | 1 | 0 | 0       | G0: |  |
| 0000722 | Telomere_maintenance_via_recombination                           |   |   |   |   |         |     |  |
| _01     | 28                                                               | 0 | 1 | 1 | 0 | 0       | G0: |  |
| 0000723 | Telomere_maintenance                                             |   |   |   |   |         |     |  |
| _01     | 16                                                               | 0 | 1 | 1 | 0 | 0       | G0: |  |
| 0000724 | Double-strand_break_repair_via_homologous_recombination          |   |   |   |   |         |     |  |
| _01     | 5                                                                | 0 | 1 | 1 | 0 | 0       | G0: |  |
| 0000731 | DNA_synthesis_involved_in_DNA_repair                             |   |   |   |   |         |     |  |
| _01     | 32                                                               | 0 | 1 | 1 | 0 | 0       | G0: |  |
| 0000775 | Chromosome,_centromeric_region                                   |   |   |   |   |         |     |  |
| _01     | 31                                                               | 0 | 1 | 1 | 0 | 0       | G0: |  |
| 0000776 | Kinetochores                                                     |   |   |   |   |         |     |  |
| _01     | 35                                                               | 0 | 1 | 1 | 0 | 0       | G0: |  |
| 0000777 | Condensed_chromosome_kinetochores                                |   |   |   |   |         |     |  |
| _01     | 7                                                                | 0 | 1 | 1 | 0 | 0       | G0: |  |
| 0000780 | Condensed_nuclear_chromosome,_centromeric_region                 |   |   |   |   |         |     |  |
| _01     | 18                                                               | 0 | 1 | 1 | 0 | 0       | G0: |  |
| 0000781 | Chromosome,_telomeric_region                                     |   |   |   |   |         |     |  |
| _01     | 5                                                                | 0 | 1 | 1 | 0 | 0       | G0: |  |
| 0000783 | Nuclear_telomere_cap_complex                                     |   |   |   |   |         |     |  |
| _01     | 8                                                                | 0 | 1 | 1 | 0 | 0       | G0: |  |
| 0000784 | Nuclear_chromosome,_telomeric_region                             |   |   |   |   |         |     |  |
| _01     | 62                                                               | 1 | 1 | 1 | 0 | 7.4e-05 | G0: |  |
| 0000785 | Chromatin                                                        |   |   |   |   |         |     |  |
| _01     | 26                                                               | 0 | 1 | 1 | 0 | 0       | G0: |  |
| 0000786 | Nucleosome                                                       |   |   |   |   |         |     |  |
| _01     | 15                                                               | 0 | 1 | 1 | 0 | 0       | G0: |  |
| 0000790 | Nuclear_chromatin                                                |   |   |   |   |         |     |  |
| _01     | 15                                                               | 0 | 1 | 1 | 0 | 0       | G0: |  |
| 0000793 | Condensed_chromosome                                             |   |   |   |   |         |     |  |
| _01     | 11                                                               | 0 | 1 | 1 | 0 | 0       | G0: |  |
| 0000794 | Condensed_nuclear_chromosome                                     |   |   |   |   |         |     |  |
| _01     | 7                                                                | 0 | 1 | 1 | 0 | 0       | G0: |  |
| 0000795 | Synaptonemal_complex                                             |   |   |   |   |         |     |  |

|             |                                                |   |             |            |   |         |     |
|-------------|------------------------------------------------|---|-------------|------------|---|---------|-----|
| _01         | 21                                             | 0 | 1           | 1          | 0 | 0       | G0: |
| 0000902     | Cell_morphogenesis                             |   |             |            |   |         |     |
| _01         | 29                                             | 0 | 1           | 1          | 0 | 0       | G0: |
| 0000910     | Cytokinesis                                    |   |             |            |   |         |     |
| _01         | 36                                             | 0 | 1           | 1          | 0 | 0       | G0: |
| 0000922     | Spindle_pole                                   |   |             |            |   |         |     |
| _01         | 19                                             | 0 | 1           | 1          | 0 | 0       | G0: |
| 0000932     | Cytoplasmic_mRNA_processing_body               |   |             |            |   |         |     |
| _01         | 6                                              | 0 | 1           | 1          | 0 | 0       | G0: |
| 0001302     | Replicative_cell_aging                         |   |             |            |   |         |     |
| _01         | 82                                             | 0 | 1           | 1          | 0 | 0       | G0: |
| 0001501     | Skeletal_system_development                    |   |             |            |   |         |     |
| _01         | 12                                             | 0 | 1           | 1          | 0 | 0       | G0: |
| 0001502     | Cartilage_condensation                         |   |             |            |   |         |     |
| _01         | 41                                             | 0 | 1           | 1          | 0 | 0       | G0: |
| 0001503     | Ossification                                   |   |             |            |   |         |     |
| _01         | 7                                              | 0 | 1           | 1          | 0 | 0       | G0: |
| 0001508     | Regulation_of_action_potential                 |   |             |            |   |         |     |
| _01         | 9                                              | 1 | 1           | 1          | 0 | 3.9e-05 | G0: |
| 0001516     | Prostaglandin_biosynthetic_process             |   |             |            |   |         |     |
| _01         | 6                                              | 0 | 1           | 1          | 0 | 0       | G0: |
| 0001518     | Voltage-gated_sodium_channel_complex           |   |             |            |   |         |     |
| _01         | 7                                              | 0 | 1           | 1          | 0 | 0       | G0: |
| 0001522     | Pseudouridine_synthesis                        |   |             |            |   |         |     |
| _01         | 86                                             | 0 | 1           | 1          | 0 | 0       | G0: |
| 0001525     | Angiogenesis                                   |   |             |            |   |         |     |
| _01         | 10                                             | 0 | 1           | 1          | 0 | 0       | G0: |
| 0001530     | Lipopolysaccharide_binding                     |   |             |            |   |         |     |
| _01         | 14                                             | 0 | 1           | 1          | 0 | 0       | G0: |
| 0001533     | Cornified_envelope                             |   |             |            |   |         |     |
| _01         | 6                                              | 0 | 1           | 1          | 0 | 0       | G0: |
| 0001539     | Ciliary_or_flagellar_motility                  |   |             |            |   |         |     |
| _01         | 13                                             | 0 | 1           | 1          | 0 | 0       | G0: |
| 0001540     | Beta-amyloid_binding                           |   |             |            |   |         |     |
| _01         | 26                                             | 0 | 1           | 1          | 0 | 0       | G0: |
| 0001541     | Ovarian_follicle_development                   |   |             |            |   |         |     |
| _01         | 9                                              | 0 | 1           | 1          | 0 | 0       | G0: |
| 0001542     | Ovulation_from_ovarian_follicle                |   |             |            |   |         |     |
| _01         | 6                                              | 0 | 1           | 1          | 0 | 0       | G0: |
| 0001553     | Luteinization                                  |   |             |            |   |         |     |
| _01         | 9                                              | 0 | 1           | 1          | 0 | 0       | G0: |
| 0001556     | Oocyte_maturation                              |   |             |            |   |         |     |
| _01         | 44                                             | 3 | 9.99999e-06 | 0.00556999 | 0 | 0       |     |
| 5.53333e-05 | G0:0001558 Regulation_of_cell_growth           |   |             |            |   |         |     |
| _01         | 28                                             | 0 | 1           | 1          | 0 | 0       | G0: |
| 0001568     | Blood_vessel_development                       |   |             |            |   |         |     |
| _01         | 17                                             | 0 | 1           | 1          | 0 | 0       | G0: |
| 0001569     | Patterning_of_blood_vessels                    |   |             |            |   |         |     |
| _01         | 33                                             | 0 | 1           | 1          | 0 | 0       | G0: |
| 0001570     | Vasculogenesis                                 |   |             |            |   |         |     |
| _01         | 7                                              | 0 | 1           | 1          | 0 | 0       | G0: |
| 0001578     | Microtubule_bundle_formation                   |   |             |            |   |         |     |
| _01         | 5                                              | 0 | 1           | 1          | 0 | 0       | G0: |
| 0001609     | Adenosine_receptor_activity,_G-protein_coupled |   |             |            |   |         |     |

|         |                                                               |   |   |   |   |          |     |
|---------|---------------------------------------------------------------|---|---|---|---|----------|-----|
| _01     | 7                                                             | 0 | 1 | 1 | 0 | 0        | G0: |
| 0001614 | Purinergic_nucleotide_receptor_activity                       |   |   |   |   |          |     |
| _01     | 11                                                            | 0 | 1 | 1 | 0 | 0        | G0: |
| 0001619 | Lysosphingolipid_and_lyso phosphatidic_acid_receptor_activity |   |   |   |   |          |     |
| _01     | 25                                                            | 0 | 1 | 1 | 0 | 0        | G0: |
| 0001649 | Osteoblast_differentiation                                    |   |   |   |   |          |     |
| _01     | 21                                                            | 0 | 1 | 1 | 0 | 0        | G0: |
| 0001656 | Metanephros_development                                       |   |   |   |   |          |     |
| _01     | 29                                                            | 0 | 1 | 1 | 0 | 0        | G0: |
| 0001657 | Ureteric_bud_development                                      |   |   |   |   |          |     |
| _01     | 26                                                            | 0 | 1 | 1 | 0 | 0        | G0: |
| 0001658 | Branching_involved_in_ureteric_bud_morphogenesis              |   |   |   |   |          |     |
| _01     | 14                                                            | 0 | 1 | 1 | 0 | 0        | G0: |
| 0001659 | Temperature_homeostasis                                       |   |   |   |   |          |     |
| _01     | 9                                                             | 0 | 1 | 1 | 0 | 0        | G0: |
| 0001662 | Behavioral_fear_response                                      |   |   |   |   |          |     |
| _01     | 27                                                            | 0 | 1 | 1 | 0 | 0        | G0: |
| 0001664 | G-protein-coupled_receptor_binding                            |   |   |   |   |          |     |
| _01     | 101                                                           | 1 | 1 | 1 | 0 | 0.000339 | G0: |
| 0001666 | Response_to_hypoxia                                           |   |   |   |   |          |     |
| _01     | 20                                                            | 0 | 1 | 1 | 0 | 0        | G0: |
| 0001669 | Acrosomal_vesicle                                             |   |   |   |   |          |     |
| _01     | 10                                                            | 0 | 1 | 1 | 0 | 0        | G0: |
| 0001673 | Male_germ_cell_nucleus                                        |   |   |   |   |          |     |
| _01     | 6                                                             | 0 | 1 | 1 | 0 | 0        | G0: |
| 0001676 | Long-chain_fatty_acid_metabolic_process                       |   |   |   |   |          |     |
| _01     | 103                                                           | 0 | 1 | 1 | 0 | 0        | G0: |
| 0001701 | In_uterus_embryonic_development                               |   |   |   |   |          |     |
| _01     | 15                                                            | 0 | 1 | 1 | 0 | 0        | G0: |
| 0001702 | Gastrulation_with_mouth_forming_second                        |   |   |   |   |          |     |
| _01     | 17                                                            | 1 | 1 | 1 | 0 | 5e-05    | G0: |
| 0001707 | Mesoderm_formation                                            |   |   |   |   |          |     |
| _01     | 9                                                             | 1 | 1 | 1 | 0 | 5e-05    | G0: |
| 0001708 | Cell_fate_specification                                       |   |   |   |   |          |     |
| _01     | 10                                                            | 0 | 1 | 1 | 0 | 0        | G0: |
| 0001709 | Cell_fate_determination                                       |   |   |   |   |          |     |
| _01     | 20                                                            | 0 | 1 | 1 | 0 | 0        | G0: |
| 0001725 | Stress_fiber                                                  |   |   |   |   |          |     |
| _01     | 40                                                            | 0 | 1 | 1 | 0 | 0        | G0: |
| 0001726 | Ruffle                                                        |   |   |   |   |          |     |
| _01     | 6                                                             | 0 | 1 | 1 | 0 | 0        | G0: |
| 0001741 | XY_body                                                       |   |   |   |   |          |     |
| _01     | 12                                                            | 0 | 1 | 1 | 0 | 0        | G0: |
| 0001750 | Photoreceptor_outer_segment                                   |   |   |   |   |          |     |
| _01     | 17                                                            | 0 | 1 | 1 | 0 | 0        | G0: |
| 0001755 | Neural_crest_cell_migration                                   |   |   |   |   |          |     |
| _01     | 32                                                            | 0 | 1 | 1 | 0 | 0        | G0: |
| 0001756 | Somitogenesis                                                 |   |   |   |   |          |     |
| _01     | 11                                                            | 0 | 1 | 1 | 0 | 0        | G0: |
| 0001759 | Organ_induction                                               |   |   |   |   |          |     |
| _01     | 36                                                            | 0 | 1 | 1 | 0 | 0        | G0: |
| 0001764 | Neuron_migration                                              |   |   |   |   |          |     |
| _01     | 11                                                            | 0 | 1 | 1 | 0 | 0        | G0: |
| 0001772 | Immunological_synapse                                         |   |   |   |   |          |     |



|         |                                                       |   |   |   |   |   |     |
|---------|-------------------------------------------------------|---|---|---|---|---|-----|
| _01     | 7                                                     | 0 | 1 | 1 | 0 | 0 | G0: |
| 0001782 | B_cell_homeostasis                                    |   |   |   |   |   |     |
| _01     | 8                                                     | 0 | 1 | 1 | 0 | 0 | G0: |
| 0001784 | Phosphotyrosine_binding                               |   |   |   |   |   |     |
| _01     | 8                                                     | 0 | 1 | 1 | 0 | 0 | G0: |
| 0001786 | Phosphatidylserine_binding                            |   |   |   |   |   |     |
| _01     | 8                                                     | 0 | 1 | 1 | 0 | 0 | G0: |
| 0001816 | Cytokine_production                                   |   |   |   |   |   |     |
| _01     | 5                                                     | 0 | 1 | 1 | 0 | 0 | G0: |
| 0001817 | Regulation_of_cytokine_production                     |   |   |   |   |   |     |
| _01     | 7                                                     | 0 | 1 | 1 | 0 | 0 | G0: |
| 0001819 | Positive_regulation_of_cytokine_production            |   |   |   |   |   |     |
| _01     | 48                                                    | 0 | 1 | 1 | 0 | 0 | G0: |
| 0001822 | Kidney_development                                    |   |   |   |   |   |     |
| _01     | 6                                                     | 0 | 1 | 1 | 0 | 0 | G0: |
| 0001823 | Mesonephros_development                               |   |   |   |   |   |     |
| _01     | 9                                                     | 0 | 1 | 1 | 0 | 0 | G0: |
| 0001824 | Blastocyst_development                                |   |   |   |   |   |     |
| _01     | 7                                                     | 0 | 1 | 1 | 0 | 0 | G0: |
| 0001829 | Trophectodermal_cell_differentiation                  |   |   |   |   |   |     |
| _01     | 17                                                    | 0 | 1 | 1 | 0 | 0 | G0: |
| 0001836 | Release_of_cytochrome_c_from_mitochondria             |   |   |   |   |   |     |
| _01     | 16                                                    | 0 | 1 | 1 | 0 | 0 | G0: |
| 0001837 | Epithelial_to_mesenchymal_transition                  |   |   |   |   |   |     |
| _01     | 6                                                     | 0 | 1 | 1 | 0 | 0 | G0: |
| 0001841 | Neural_tube_formation                                 |   |   |   |   |   |     |
| _01     | 25                                                    | 0 | 1 | 1 | 0 | 0 | G0: |
| 0001843 | Neural_tube_closure                                   |   |   |   |   |   |     |
| _01     | 5                                                     | 0 | 1 | 1 | 0 | 0 | G0: |
| 0001882 | Nucleoside_binding                                    |   |   |   |   |   |     |
| _01     | 42                                                    | 0 | 1 | 1 | 0 | 0 | G0: |
| 0001889 | Liver_development                                     |   |   |   |   |   |     |
| _01     | 13                                                    | 0 | 1 | 1 | 0 | 0 | G0: |
| 0001890 | Placenta_development                                  |   |   |   |   |   |     |
| _01     | 11                                                    | 0 | 1 | 1 | 0 | 0 | G0: |
| 0001892 | Embryonic_placenta_development                        |   |   |   |   |   |     |
| _01     | 7                                                     | 0 | 1 | 1 | 0 | 0 | G0: |
| 0001894 | Tissue_homeostasis                                    |   |   |   |   |   |     |
| _01     | 7                                                     | 0 | 1 | 1 | 0 | 0 | G0: |
| 0001917 | Photoreceptor_inner_segment                           |   |   |   |   |   |     |
| _01     | 9                                                     | 0 | 1 | 1 | 0 | 0 | G0: |
| 0001932 | Regulation_of_protein_phosphorylation                 |   |   |   |   |   |     |
| _01     | 16                                                    | 0 | 1 | 1 | 0 | 0 | G0: |
| 0001933 | Negative_regulation_of_protein_phosphorylation        |   |   |   |   |   |     |
| _01     | 30                                                    | 0 | 1 | 1 | 0 | 0 | G0: |
| 0001934 | Positive_regulation_of_protein_phosphorylation        |   |   |   |   |   |     |
| _01     | 6                                                     | 0 | 1 | 1 | 0 | 0 | G0: |
| 0001935 | Endothelial_cell_proliferation                        |   |   |   |   |   |     |
| _01     | 11                                                    | 0 | 1 | 1 | 0 | 0 | G0: |
| 0001937 | Negative_regulation_of_endothelial_cell_proliferation |   |   |   |   |   |     |
| _01     | 28                                                    | 0 | 1 | 1 | 0 | 0 | G0: |
| 0001938 | Positive_regulation_of_endothelial_cell_proliferation |   |   |   |   |   |     |
| _01     | 11                                                    | 0 | 1 | 1 | 0 | 0 | G0: |
| 0001942 | Hair_follicle_development                             |   |   |   |   |   |     |

|         |                                                            |   |   |   |   |          |     |
|---------|------------------------------------------------------------|---|---|---|---|----------|-----|
| _01     | 5                                                          | 0 | 1 | 1 | 0 | 0        | G0: |
| 0001944 | Vasculature_development                                    |   |   |   |   |          |     |
| _01     | 6                                                          | 0 | 1 | 1 | 0 | 0        | G0: |
| 0001946 | Lymphangiogenesis                                          |   |   |   |   |          |     |
| _01     | 22                                                         | 0 | 1 | 1 | 0 | 0        | G0: |
| 0001947 | Heart_looping                                              |   |   |   |   |          |     |
| _01     | 14                                                         | 0 | 1 | 1 | 0 | 0        | G0: |
| 0001948 | Glycoprotein_binding                                       |   |   |   |   |          |     |
| _01     | 6                                                          | 0 | 1 | 1 | 0 | 0        | G0: |
| 0001952 | Regulation_of_cell-matrix_adhesion                         |   |   |   |   |          |     |
| _01     | 5                                                          | 0 | 1 | 1 | 0 | 0        | G0: |
| 0001953 | Negative_regulation_of_cell-matrix_adhesion                |   |   |   |   |          |     |
| _01     | 9                                                          | 0 | 1 | 1 | 0 | 0        | G0: |
| 0001954 | Positive_regulation_of_cell-matrix_adhesion                |   |   |   |   |          |     |
| _01     | 5                                                          | 0 | 1 | 1 | 0 | 0        | G0: |
| 0001955 | Blood_vessel_maturation                                    |   |   |   |   |          |     |
| _01     | 5                                                          | 0 | 1 | 1 | 0 | 0        | G0: |
| 0001957 | Intramembranous_ossification                               |   |   |   |   |          |     |
| _01     | 8                                                          | 0 | 1 | 1 | 0 | 0        | G0: |
| 0001958 | Endochondral_ossification                                  |   |   |   |   |          |     |
| _01     | 5                                                          | 0 | 1 | 1 | 0 | 0        | G0: |
| 0001960 | Negative_regulation_of_cytokine-mediated_signaling_pathway |   |   |   |   |          |     |
| _01     | 5                                                          | 0 | 1 | 1 | 0 | 0        | G0: |
| 0001963 | Synaptic_transmission,_dopaminergic                        |   |   |   |   |          |     |
| _01     | 6                                                          | 0 | 1 | 1 | 0 | 0        | G0: |
| 0001965 | G-protein_alpha-subunit_binding                            |   |   |   |   |          |     |
| _01     | 7                                                          | 0 | 1 | 1 | 0 | 0        | G0: |
| 0001968 | Fibronectin_binding                                        |   |   |   |   |          |     |
| _01     | 7                                                          | 0 | 1 | 1 | 0 | 0        | G0: |
| 0001972 | Retinoic_acid_binding                                      |   |   |   |   |          |     |
| _01     | 16                                                         | 0 | 1 | 1 | 0 | 0        | G0: |
| 0001974 | Blood_vessel_remodeling                                    |   |   |   |   |          |     |
| _01     | 14                                                         | 0 | 1 | 1 | 0 | 0        | G0: |
| 0001975 | Response_to_amphetamine                                    |   |   |   |   |          |     |
| _01     | 9                                                          | 0 | 1 | 1 | 0 | 0        | G0: |
| 0002009 | Morphogenesis_of_an_epithelium                             |   |   |   |   |          |     |
| _01     | 5                                                          | 0 | 1 | 1 | 0 | 0        | G0: |
| 0002011 | Morphogenesis_of_an_epithelial_sheet                       |   |   |   |   |          |     |
| _01     | 20                                                         | 1 | 1 | 1 | 0 | 0.000339 | G0: |
| 0002020 | Protease_binding                                           |   |   |   |   |          |     |
| _01     | 12                                                         | 0 | 1 | 1 | 0 | 0        | G0: |
| 0002026 | Regulation_of_the_force_of_heart_contraction               |   |   |   |   |          |     |
| _01     | 8                                                          | 0 | 1 | 1 | 0 | 0        | G0: |
| 0002027 | Regulation_of_heart_rate                                   |   |   |   |   |          |     |
| _01     | 6                                                          | 0 | 1 | 1 | 0 | 0        | G0: |
| 0002028 | Regulation_of_sodium_ion_transport                         |   |   |   |   |          |     |
| _01     | 17                                                         | 0 | 1 | 1 | 0 | 0        | G0: |
| 0002039 | P53_binding                                                |   |   |   |   |          |     |
| _01     | 7                                                          | 0 | 1 | 1 | 0 | 0        | G0: |
| 0002040 | Sprouting_angiogenesis                                     |   |   |   |   |          |     |
| _01     | 7                                                          | 0 | 1 | 1 | 0 | 0        | G0: |
| 0002052 | Positive_regulation_of_neuroblast_proliferation            |   |   |   |   |          |     |
| _01     | 23                                                         | 0 | 1 | 1 | 0 | 0        | G0: |
| 0002053 | Positive_regulation_of_mesenchymal_cell_proliferation      |   |   |   |   |          |     |

|           |                                                                                       |   |          |           |   |          |     |
|-----------|---------------------------------------------------------------------------------------|---|----------|-----------|---|----------|-----|
| _01       | 7                                                                                     | 0 | 1        | 1         | 0 | 0        | G0: |
| 0002062   | Chondrocyte_differentiation                                                           |   |          |           |   |          |     |
| _01       | 5                                                                                     | 0 | 1        | 1         | 0 | 0        | G0: |
| 0002063   | Chondrocyte_development                                                               |   |          |           |   |          |     |
| _01       | 9                                                                                     | 0 | 1        | 1         | 0 | 0        | G0: |
| 0002076   | Osteoblast_development                                                                |   |          |           |   |          |     |
| _01       | 5                                                                                     | 0 | 1        | 1         | 0 | 0        | G0: |
| 0002087   | Regulation_of_respiratory_gaseous_exchange_by_neurological_system_process             |   |          |           |   |          |     |
| _01       | 10                                                                                    | 0 | 1        | 1         | 0 | 0        | G0: |
| 0002088   | Lens_development_in_camera-type_eye                                                   |   |          |           |   |          |     |
| _01       | 5                                                                                     | 0 | 1        | 1         | 0 | 0        | G0: |
| 0002102   | Podosome                                                                              |   |          |           |   |          |     |
| _01       | 7                                                                                     | 0 | 1        | 1         | 0 | 0        | G0: |
| 0002244   | Hemopoietic_progenitor_cell_differentiation                                           |   |          |           |   |          |     |
| _01       | 5                                                                                     | 0 | 1        | 1         | 0 | 0        | G0: |
| 0002446   | Neutrophil_mediated_immunity                                                          |   |          |           |   |          |     |
| _01       | 6                                                                                     | 0 | 1        | 1         | 0 | 0        | G0: |
| 0002548   | Monocyte_chemotaxis                                                                   |   |          |           |   |          |     |
| _01       | 52                                                                                    | 2 | 0.000348 | 0.0950739 | 0 |          |     |
| 0.0001945 | G0:0002576 Platelet_degranulation                                                     |   |          |           |   |          |     |
| _01       | 5                                                                                     | 0 | 1        | 1         | 0 | 0        | G0: |
| 0002675   | Positive_regulation_of_acute_inflammatory_response                                    |   |          |           |   |          |     |
| _01       | 5                                                                                     | 0 | 1        | 1         | 0 | 0        | G0: |
| 0002687   | Positive_regulation_of_leukocyte_migration                                            |   |          |           |   |          |     |
| _01       | 40                                                                                    | 0 | 1        | 1         | 0 | 0        | G0: |
| 0002756   | MyD88-independent_toll-like_receptor_signaling_pathway                                |   |          |           |   |          |     |
| _01       | 5                                                                                     | 0 | 1        | 1         | 0 | 0        | G0: |
| 0002925   | Positive_regulation_of_humoral_immune_response_mediated_by_circulating_immunoglobulin |   |          |           |   |          |     |
| _01       | 23                                                                                    | 0 | 1        | 1         | 0 | 0        | G0: |
| 0003007   | Heart_morphogenesis                                                                   |   |          |           |   |          |     |
| _01       | 7                                                                                     | 0 | 1        | 1         | 0 | 0        | G0: |
| 0003009   | Skeletal_muscle_contraction                                                           |   |          |           |   |          |     |
| _01       | 5                                                                                     | 0 | 1        | 1         | 0 | 0        | G0: |
| 0003016   | Respiratory_system_process                                                            |   |          |           |   |          |     |
| _01       | 9                                                                                     | 0 | 1        | 1         | 0 | 0        | G0: |
| 0003151   | Outflow_tract_morphogenesis                                                           |   |          |           |   |          |     |
| _01       | 5                                                                                     | 0 | 1        | 1         | 0 | 0        | G0: |
| 0003281   | Ventricular_septum_development                                                        |   |          |           |   |          |     |
| _01       | 5                                                                                     | 0 | 1        | 1         | 0 | 0        | G0: |
| 0003337   | Mesenchymal_to_epithelial_transition_involved_in_metanephros_morphogenesis            |   |          |           |   |          |     |
| _01       | 397                                                                                   | 1 | 1        | 1         | 0 | 0.000423 | G0: |
| 0003674   | Molecular_function                                                                    |   |          |           |   |          |     |
| _01       | 175                                                                                   | 1 | 1        | 1         | 0 | 5.9e-05  | G0: |
| 0003676   | Nucleic_acid_binding                                                                  |   |          |           |   |          |     |
| _01       | 9                                                                                     | 0 | 1        | 1         | 0 | 0        | G0: |
| 0003678   | DNA_helicase_activity                                                                 |   |          |           |   |          |     |
| _01       | 106                                                                                   | 0 | 1        | 1         | 0 | 0        | G0: |
| 0003682   | Chromatin_binding                                                                     |   |          |           |   |          |     |

|            |                                                                                    |   |        |          |   |           |     |
|------------|------------------------------------------------------------------------------------|---|--------|----------|---|-----------|-----|
| _01        | 31                                                                                 | 0 | 1      | 1        | 0 | 0         | G0: |
| 0003684    | Damaged_DNA_binding                                                                |   |        |          |   |           |     |
| _01        | 79                                                                                 | 2 | 0.0012 | 0.185405 | 0 | 6.85e-05  | G0: |
| 0003690    | Double-stranded_DNA_binding                                                        |   |        |          |   |           |     |
| _01        | 31                                                                                 | 0 | 1      | 1        | 0 | 0         | G0: |
| 0003697    | Single-stranded_DNA_binding                                                        |   |        |          |   |           |     |
| _01        | 622                                                                                | 6 | 3e-06  | 0.00182  | 0 | 0.0002155 |     |
| G0:0003700 | Sequence-specific_DNA_binding_transcription_factor_activity                        |   |        |          |   |           |     |
| _01        | 92                                                                                 | 1 | 1      | 1        | 0 | 0.000344  | G0: |
| 0003702    | RNA_polymerase_II_transcription_factor_activity                                    |   |        |          |   |           |     |
| _01        | 52                                                                                 | 1 | 1      | 1        | 0 | 6.3e-05   | G0: |
| 0003704    | Specific_RNA_polymerase_II_transcription_factor_activity                           |   |        |          |   |           |     |
| _01        | 56                                                                                 | 1 | 1      | 1        | 0 | 6.3e-05   | G0: |
| 0003705    | Sequence-specific_enhancer_binding_RNA_polymerase_II_transcription_factor_activity |   |        |          |   |           |     |
| _01        | 5                                                                                  | 0 | 1      | 1        | 0 | 0         | G0: |
| 0003706    | Ligand-regulated_transcription_factor_activity                                     |   |        |          |   |           |     |
| _01        | 32                                                                                 | 0 | 1      | 1        | 0 | 0         | G0: |
| 0003707    | Steroid_hormone_receptor_activity                                                  |   |        |          |   |           |     |
| _01        | 5                                                                                  | 0 | 1      | 1        | 0 | 0         | G0: |
| 0003711    | Transcription_elongation_regulator_activity                                        |   |        |          |   |           |     |
| _01        | 25                                                                                 | 0 | 1      | 1        | 0 | 0         | G0: |
| 0003712    | Transcription_cofactor_activity                                                    |   |        |          |   |           |     |
| _01        | 130                                                                                | 0 | 1      | 1        | 0 | 0         | G0: |
| 0003713    | Transcription_coactivator_activity                                                 |   |        |          |   |           |     |
| _01        | 99                                                                                 | 0 | 1      | 1        | 0 | 0         | G0: |
| 0003714    | Transcription_corepressor_activity                                                 |   |        |          |   |           |     |
| _01        | 394                                                                                | 1 | 1      | 1        | 0 | 0.000423  | G0: |
| 0003723    | RNA_binding                                                                        |   |        |          |   |           |     |
| _01        | 7                                                                                  | 1 | 1      | 1        | 0 | 5.2e-05   | G0: |
| 0003724    | RNA_helicase_activity                                                              |   |        |          |   |           |     |
| _01        | 19                                                                                 | 1 | 1      | 1        | 0 | 5.2e-05   | G0: |
| 0003725    | Double-stranded_RNA_binding                                                        |   |        |          |   |           |     |
| _01        | 8                                                                                  | 0 | 1      | 1        | 0 | 0         | G0: |
| 0003727    | Single-stranded_RNA_binding                                                        |   |        |          |   |           |     |
| _01        | 29                                                                                 | 0 | 1      | 1        | 0 | 0         | G0: |
| 0003729    | mRNA_binding                                                                       |   |        |          |   |           |     |
| _01        | 14                                                                                 | 0 | 1      | 1        | 0 | 0         | G0: |
| 0003730    | mRNA_3'-UTR_binding                                                                |   |        |          |   |           |     |
| _01        | 109                                                                                | 0 | 1      | 1        | 0 | 0         | G0: |
| 0003735    | Structural_constituent_of_ribosome                                                 |   |        |          |   |           |     |
| _01        | 34                                                                                 | 0 | 1      | 1        | 0 | 0         | G0: |
| 0003743    | Translation_initiation_factor_activity                                             |   |        |          |   |           |     |
| _01        | 20                                                                                 | 0 | 1      | 1        | 0 | 0         | G0: |
| 0003746    | Translation_elongation_factor_activity                                             |   |        |          |   |           |     |
| _01        | 25                                                                                 | 0 | 1      | 1        | 0 | 0         | G0: |
| 0003755    | Peptidyl-prolyl_cis-trans_isomerase_activity                                       |   |        |          |   |           |     |
| _01        | 5                                                                                  | 0 | 1      | 1        | 0 | 0         | G0: |
| 0003756    | Protein_disulfide_isomerase_activity                                               |   |        |          |   |           |     |
| _01        | 50                                                                                 | 0 | 1      | 1        | 0 | 0         | G0: |
| 0003774    | Motor_activity                                                                     |   |        |          |   |           |     |
| _01        | 50                                                                                 | 0 | 1      | 1        | 0 | 0         | G0: |

|         |                                                          |   |          |          |   |          |     |  |
|---------|----------------------------------------------------------|---|----------|----------|---|----------|-----|--|
| 0003777 | Microtubule_motor_activity                               |   |          |          |   |          |     |  |
| _01     | 198                                                      | 2 | 0.020267 | 0.582399 | 0 | 5.95e-05 | G0: |  |
| 0003779 | Actin_binding                                            |   |          |          |   |          |     |  |
| _01     | 7                                                        | 0 | 1        | 1        | 0 | 0        | G0: |  |
| 0003785 | Actin_monomer_binding                                    |   |          |          |   |          |     |  |
| _01     | 5                                                        | 0 | 1        | 1        | 0 | 0        | G0: |  |
| 0003796 | Lysozyme_activity                                        |   |          |          |   |          |     |  |
| _01     | 28                                                       | 0 | 1        | 1        | 0 | 0        | G0: |  |
| 0003823 | Antigen_binding                                          |   |          |          |   |          |     |  |
| _01     | 72                                                       | 0 | 1        | 1        | 0 | 0        | G0: |  |
| 0003824 | Catalytic_activity                                       |   |          |          |   |          |     |  |
| _01     | 3                                                        | 0 | 1        | 1        | 0 | 0        | G0: |  |
| 0003840 | Gamma-glutamyltransferase_activity                       |   |          |          |   |          |     |  |
| _01     | 7                                                        | 0 | 1        | 1        | 0 | 0        | G0: |  |
| 0003841 | 1-acylglycerol-3-phosphate_0-acyltransferase_activity    |   |          |          |   |          |     |  |
| _01     | 5                                                        | 0 | 1        | 1        | 0 | 0        | G0: |  |
| 0003847 | 1-alkyl-2-acetylgllycerophosphocholine_esterase_activity |   |          |          |   |          |     |  |
| _01     | 16                                                       | 0 | 1        | 1        | 0 | 0        | G0: |  |
| 0003887 | DNA-directed_DNA_polymerase_activity                     |   |          |          |   |          |     |  |
| _01     | 22                                                       | 0 | 1        | 1        | 0 | 0        | G0: |  |
| 0003899 | DNA-directed_RNA_polymerase_activity                     |   |          |          |   |          |     |  |
| _01     | 7                                                        | 0 | 1        | 1        | 0 | 0        | G0: |  |
| 0003906 | DNA-(apurinic_or_aprimidinic_site)_lyase_activity        |   |          |          |   |          |     |  |
| _01     | 145                                                      | 1 | 1        | 1        | 0 | 0.000423 | G0: |  |
| 0003924 | GTPase_activity                                          |   |          |          |   |          |     |  |
| _01     | 12                                                       | 0 | 1        | 1        | 0 | 0        | G0: |  |
| 0003950 | NAD+_ADP-ribosyltransferase_activity                     |   |          |          |   |          |     |  |
| _01     | 5                                                        | 0 | 1        | 1        | 0 | 0        | G0: |  |
| 0003954 | NADH_dehydrogenase_activity                              |   |          |          |   |          |     |  |
| _01     | 7                                                        | 0 | 1        | 1        | 0 | 0        | G0: |  |
| 0003993 | Acid_phosphatase_activity                                |   |          |          |   |          |     |  |
| _01     | 7                                                        | 0 | 1        | 1        | 0 | 0        | G0: |  |
| 0003995 | Acyl-CoA_dehydrogenase_activity                          |   |          |          |   |          |     |  |
| _01     | 15                                                       | 1 | 1        | 1        | 0 | 5.2e-05  | G0: |  |
| 0004003 | ATP-dependent_DNA_helicase_activity                      |   |          |          |   |          |     |  |
| _01     | 11                                                       | 1 | 1        | 1        | 0 | 5.2e-05  | G0: |  |
| 0004004 | ATP-dependent_RNA_helicase_activity                      |   |          |          |   |          |     |  |
| _01     | 9                                                        | 0 | 1        | 1        | 0 | 0        | G0: |  |
| 0004012 | Phospholipid-translocating_ATPase_activity               |   |          |          |   |          |     |  |
| _01     | 9                                                        | 0 | 1        | 1        | 0 | 0        | G0: |  |
| 0004016 | Adenylate_cyclase_activity                               |   |          |          |   |          |     |  |
| _01     | 6                                                        | 0 | 1        | 1        | 0 | 0        | G0: |  |
| 0004017 | Adenylate_kinase_activity                                |   |          |          |   |          |     |  |
| _01     | 7                                                        | 0 | 1        | 1        | 0 | 0        | G0: |  |
| 0004029 | Aldehyde_dehydrogenase_(NAD)_activity                    |   |          |          |   |          |     |  |
| _01     | 5                                                        | 0 | 1        | 1        | 0 | 0        | G0: |  |
| 0004033 | Aldo-keto_reductase_activity                             |   |          |          |   |          |     |  |
| _01     | 3                                                        | 0 | 1        | 1        | 0 | 0        | G0: |  |
| 0004035 | Alkaline_phosphatase_activity                            |   |          |          |   |          |     |  |
| _01     | 6                                                        | 0 | 1        | 1        | 0 | 0        | G0: |  |
| 0004065 | Arylsulfatase_activity                                   |   |          |          |   |          |     |  |
| _01     | 6                                                        | 0 | 1        | 1        | 0 | 0        | G0: |  |
| 0004089 | Carbonate_dehydratase_activity                           |   |          |          |   |          |     |  |
| _01     | 16                                                       | 0 | 1        | 1        | 0 | 0        | G0: |  |

|         |                                                        |   |          |          |   |          |  |     |
|---------|--------------------------------------------------------|---|----------|----------|---|----------|--|-----|
| 0004091 | Carboxylesterase_activity                              |   |          |          |   |          |  |     |
| _01     | 5                                                      | 0 | 1        | 1        | 0 | 0        |  | G0: |
| 0004114 | 3',5'-cyclic-nucleotide_phosphodiesterase_activity     |   |          |          |   |          |  |     |
| _01     | 9                                                      | 0 | 1        | 1        | 0 | 0        |  | G0: |
| 0004115 | 3',5'-cyclic-AMP_phosphodiesterase_activity            |   |          |          |   |          |  |     |
| _01     | 6                                                      | 0 | 1        | 1        | 0 | 0        |  | G0: |
| 0004128 | Cytochrome-b5_reductase_activity                       |   |          |          |   |          |  |     |
| _01     | 18                                                     | 0 | 1        | 1        | 0 | 0        |  | G0: |
| 0004129 | Cytochrome-c_oxidase_activity                          |   |          |          |   |          |  |     |
| _01     | 11                                                     | 0 | 1        | 1        | 0 | 0        |  | G0: |
| 0004143 | Diacylglycerol_kinase_activity                         |   |          |          |   |          |  |     |
| _01     | 10                                                     | 0 | 1        | 1        | 0 | 0        |  | G0: |
| 0004175 | Endopeptidase_activity                                 |   |          |          |   |          |  |     |
| _01     | 18                                                     | 0 | 1        | 1        | 0 | 0        |  | G0: |
| 0004177 | Aminopeptidase_activity                                |   |          |          |   |          |  |     |
| _01     | 14                                                     | 0 | 1        | 1        | 0 | 0        |  | G0: |
| 0004180 | Carboxypeptidase_activity                              |   |          |          |   |          |  |     |
| _01     | 17                                                     | 0 | 1        | 1        | 0 | 0        |  | G0: |
| 0004181 | Metallocoarboxypeptidase_activity                      |   |          |          |   |          |  |     |
| _01     | 5                                                      | 0 | 1        | 1        | 0 | 0        |  | G0: |
| 0004185 | Serine-type_carboxypeptidase_activity                  |   |          |          |   |          |  |     |
| _01     | 11                                                     | 0 | 1        | 1        | 0 | 0        |  | G0: |
| 0004190 | Aspartic-type_endopeptidase_activity                   |   |          |          |   |          |  |     |
| _01     | 34                                                     | 0 | 1        | 1        | 0 | 0        |  | G0: |
| 0004197 | Cysteine-type_endopeptidase_activity                   |   |          |          |   |          |  |     |
| _01     | 10                                                     | 0 | 1        | 1        | 0 | 0        |  | G0: |
| 0004198 | Calcium-dependent_cysteine-type_endopeptidase_activity |   |          |          |   |          |  |     |
| _01     | 36                                                     | 0 | 1        | 1        | 0 | 0        |  | G0: |
| 0004221 | Ubiquitin_thiolesterase_activity                       |   |          |          |   |          |  |     |
| _01     | 75                                                     | 2 | 0.001655 | 0.219867 | 0 | 7.35e-05 |  | G0: |
| 0004222 | Metalloendopeptidase_activity                          |   |          |          |   |          |  |     |
| _01     | 94                                                     | 0 | 1        | 1        | 0 | 0        |  | G0: |
| 0004252 | Serine-type_endopeptidase_activity                     |   |          |          |   |          |  |     |
| _01     | 14                                                     | 0 | 1        | 1        | 0 | 0        |  | G0: |
| 0004298 | Threonine-type_endopeptidase_activity                  |   |          |          |   |          |  |     |
| _01     | 5                                                      | 0 | 1        | 1        | 0 | 0        |  | G0: |
| 0004303 | Estradiol_17-beta-dehydrogenase_activity               |   |          |          |   |          |  |     |
| _01     | 8                                                      | 0 | 1        | 1        | 0 | 0        |  | G0: |
| 0004364 | Glutathione_transferase_activity                       |   |          |          |   |          |  |     |
| _01     | 10                                                     | 0 | 1        | 1        | 0 | 0        |  | G0: |
| 0004383 | Guanylate_cyclase_activity                             |   |          |          |   |          |  |     |
| _01     | 6                                                      | 0 | 1        | 1        | 0 | 0        |  | G0: |
| 0004385 | Guanylate_kinase_activity                              |   |          |          |   |          |  |     |
| _01     | 68                                                     | 1 | 1        | 1        | 0 | 5.9e-05  |  | G0: |
| 0004386 | Helicase_activity                                      |   |          |          |   |          |  |     |
| _01     | 28                                                     | 0 | 1        | 1        | 0 | 0        |  | G0: |
| 0004402 | Histone_acetyltransferase_activity                     |   |          |          |   |          |  |     |
| _01     | 9                                                      | 0 | 1        | 1        | 0 | 0        |  | G0: |
| 0004407 | Histone_deacetylase_activity                           |   |          |          |   |          |  |     |
| _01     | 6                                                      | 0 | 1        | 1        | 0 | 0        |  | G0: |
| 0004428 | Inositol_or_phosphatidylinositol_kinase_activity       |   |          |          |   |          |  |     |
| _01     | 19                                                     | 0 | 1        | 1        | 0 | 0        |  | G0: |
| 0004435 | Phosphoinositide_phospholipase_C_activity              |   |          |          |   |          |  |     |
| _01     | 8                                                      | 0 | 1        | 1        | 0 | 0        |  | G0: |



|         |                                                                 |   |   |   |   |          |     |
|---------|-----------------------------------------------------------------|---|---|---|---|----------|-----|
| _01     | 205                                                             | 1 | 1 | 1 | 0 | 5e-05    | G0: |
| 0004674 | Protein_serine/threonine_kinase_activity                        |   |   |   |   |          |     |
| _01     | 5                                                               | 0 | 1 | 1 | 0 | 0        | G0: |
| 0004675 | Transmembrane_receptor_protein_serine/threonine_kinase_activity |   |   |   |   |          |     |
| _01     | 10                                                              | 0 | 1 | 1 | 0 | 0        | G0: |
| 0004683 | Calmodulin-dependent_protein_kinase_activity                    |   |   |   |   |          |     |
| _01     | 4                                                               | 0 | 1 | 1 | 0 | 0        | G0: |
| 0004691 | CAMP-dependent_protein_kinase_activity                          |   |   |   |   |          |     |
| _01     | 15                                                              | 0 | 1 | 1 | 0 | 0        | G0: |
| 0004693 | Cyclin-dependent_protein_kinase_activity                        |   |   |   |   |          |     |
| _01     | 11                                                              | 0 | 1 | 1 | 0 | 0        | G0: |
| 0004697 | Protein_kinase_C_activity                                       |   |   |   |   |          |     |
| _01     | 11                                                              | 0 | 1 | 1 | 0 | 0        | G0: |
| 0004707 | MAP_kinase_activity                                             |   |   |   |   |          |     |
| _01     | 8                                                               | 0 | 1 | 1 | 0 | 0        | G0: |
| 0004708 | MAP_kinase_kinase_activity                                      |   |   |   |   |          |     |
| _01     | 11                                                              | 0 | 1 | 1 | 0 | 0        | G0: |
| 0004709 | MAP_kinase_kinase_kinase_activity                               |   |   |   |   |          |     |
| _01     | 54                                                              | 0 | 1 | 1 | 0 | 0        | G0: |
| 0004713 | Protein_tyrosine_kinase_activity                                |   |   |   |   |          |     |
| _01     | 25                                                              | 0 | 1 | 1 | 0 | 0        | G0: |
| 0004714 | Transmembrane_receptor_protein_tyrosine_kinase_activity         |   |   |   |   |          |     |
| _01     | 25                                                              | 0 | 1 | 1 | 0 | 0        | G0: |
| 0004715 | Non-membrane_spanning_protein_tyrosine_kinase_activity          |   |   |   |   |          |     |
| _01     | 7                                                               | 0 | 1 | 1 | 0 | 0        | G0: |
| 0004716 | Receptor_signaling_protein_tyrosine_kinase_activity             |   |   |   |   |          |     |
| _01     | 25                                                              | 0 | 1 | 1 | 0 | 0        | G0: |
| 0004721 | Phosphoprotein_phosphatase_activity                             |   |   |   |   |          |     |
| _01     | 20                                                              | 1 | 1 | 1 | 0 | 5e-05    | G0: |
| 0004722 | Protein_serine/threonine_phosphatase_activity                   |   |   |   |   |          |     |
| _01     | 57                                                              | 0 | 1 | 1 | 0 | 0        | G0: |
| 0004725 | Protein_tyrosine_phosphatase_activity                           |   |   |   |   |          |     |
| _01     | 7                                                               | 0 | 1 | 1 | 0 | 0        | G0: |
| 0004767 | Sphingomyelin_phosphodiesterase_activity                        |   |   |   |   |          |     |
| _01     | 5                                                               | 0 | 1 | 1 | 0 | 0        | G0: |
| 0004791 | Thioredoxin-disulfide_reductase_activity                        |   |   |   |   |          |     |
| _01     | 8                                                               | 0 | 1 | 1 | 0 | 0        | G0: |
| 0004806 | Triglyceride_lipase_activity                                    |   |   |   |   |          |     |
| _01     | 8                                                               | 0 | 1 | 1 | 0 | 0        | G0: |
| 0004835 | Tubulin-tyrosine_ligase_activity                                |   |   |   |   |          |     |
| _01     | 126                                                             | 1 | 1 | 1 | 0 | 0.000423 | G0: |
| 0004842 | Ubiquitin-protein_ligase_activity                               |   |   |   |   |          |     |
| _01     | 18                                                              | 0 | 1 | 1 | 0 | 0        | G0: |
| 0004843 | Ubiquitin-specific_protease_activity                            |   |   |   |   |          |     |
| _01     | 16                                                              | 0 | 1 | 1 | 0 | 0        | G0: |
| 0004857 | Enzyme_inhibitor_activity                                       |   |   |   |   |          |     |
| _01     | 7                                                               | 0 | 1 | 1 | 0 | 0        | G0: |
| 0004859 | Phospholipase_inhibitor_activity                                |   |   |   |   |          |     |
| _01     | 14                                                              | 0 | 1 | 1 | 0 | 0        | G0: |
| 0004860 | Protein_kinase_inhibitor_activity                               |   |   |   |   |          |     |
| _01     | 9                                                               | 0 | 1 | 1 | 0 | 0        | G0: |
| 0004861 | Cyclin-dependent_protein_kinase_inhibitor_activity              |   |   |   |   |          |     |
| _01     | 13                                                              | 0 | 1 | 1 | 0 | 0        | G0: |



|         |                                                                     |   |   |   |   |          |     |  |
|---------|---------------------------------------------------------------------|---|---|---|---|----------|-----|--|
| 0004864 | Phosphoprotein_phosphatase_inhibitor_activity                       |   |   |   |   |          |     |  |
| _01     | 16                                                                  | 0 | 1 | 1 | 0 | 0        | G0: |  |
| 0004866 | Endopeptidase_inhibitor_activity                                    |   |   |   |   |          |     |  |
| _01     | 58                                                                  | 1 | 1 | 1 | 0 | 0.000339 | G0: |  |
| 0004867 | Serine-type_endopeptidase_inhibitor_activity                        |   |   |   |   |          |     |  |
| _01     | 12                                                                  | 0 | 1 | 1 | 0 | 0        | G0: |  |
| 0004869 | Cysteine-type_endopeptidase_inhibitor_activity                      |   |   |   |   |          |     |  |
| _01     | 188                                                                 | 0 | 1 | 1 | 0 | 0        | G0: |  |
| 0004871 | Signal_transducer_activity                                          |   |   |   |   |          |     |  |
| _01     | 862                                                                 | 1 | 1 | 1 | 0 | 5.9e-05  | G0: |  |
| 0004872 | Receptor_activity                                                   |   |   |   |   |          |     |  |
| _01     | 20                                                                  | 0 | 1 | 1 | 0 | 0        | G0: |  |
| 0004879 | Ligand-dependent_nuclear_receptor_activity                          |   |   |   |   |          |     |  |
| _01     | 6                                                                   | 0 | 1 | 1 | 0 | 0        | G0: |  |
| 0004887 | Thyroid_hormone_receptor_activity                                   |   |   |   |   |          |     |  |
| _01     | 73                                                                  | 0 | 1 | 1 | 0 | 0        | G0: |  |
| 0004888 | Transmembrane_receptor_activity                                     |   |   |   |   |          |     |  |
| _01     | 11                                                                  | 0 | 1 | 1 | 0 | 0        | G0: |  |
| 0004889 | Nicotinic_acetylcholine-activated_cation-selective_channel_activity |   |   |   |   |          |     |  |
| _01     | 13                                                                  | 0 | 1 | 1 | 0 | 0        | G0: |  |
| 0004890 | GABA-A_receptor_activity                                            |   |   |   |   |          |     |  |
| _01     | 11                                                                  | 0 | 1 | 1 | 0 | 0        | G0: |  |
| 0004896 | Cytokine_receptor_activity                                          |   |   |   |   |          |     |  |
| _01     | 5                                                                   | 0 | 1 | 1 | 0 | 0        | G0: |  |
| 0004908 | Interleukin-1_receptor_activity                                     |   |   |   |   |          |     |  |
| _01     | 242                                                                 | 1 | 1 | 1 | 0 | 5.9e-05  | G0: |  |
| 0004930 | G-protein_coupled_receptor_activity                                 |   |   |   |   |          |     |  |
| _01     | 7                                                                   | 0 | 1 | 1 | 0 | 0        | G0: |  |
| 0004931 | Extracellular_ATP-gated_cation_channel_activity                     |   |   |   |   |          |     |  |
| _01     | 6                                                                   | 0 | 1 | 1 | 0 | 0        | G0: |  |
| 0004935 | Adrenergic_receptor_activity                                        |   |   |   |   |          |     |  |
| _01     | 14                                                                  | 0 | 1 | 1 | 0 | 0        | G0: |  |
| 0004950 | Chemokine_receptor_activity                                         |   |   |   |   |          |     |  |
| _01     | 5                                                                   | 0 | 1 | 1 | 0 | 0        | G0: |  |
| 0004957 | Prostaglandin_E_receptor_activity                                   |   |   |   |   |          |     |  |
| _01     | 6                                                                   | 0 | 1 | 1 | 0 | 0        | G0: |  |
| 0004969 | Histamine_receptor_activity                                         |   |   |   |   |          |     |  |
| _01     | 5                                                                   | 0 | 1 | 1 | 0 | 0        | G0: |  |
| 0004977 | Melanocortin_receptor_activity                                      |   |   |   |   |          |     |  |
| _01     | 4                                                                   | 0 | 1 | 1 | 0 | 0        | G0: |  |
| 0004982 | N-formyl_peptide_receptor_activity                                  |   |   |   |   |          |     |  |
| _01     | 6                                                                   | 0 | 1 | 1 | 0 | 0        | G0: |  |
| 0004983 | Neuropeptide_Y_receptor_activity                                    |   |   |   |   |          |     |  |
| _01     | 284                                                                 | 0 | 1 | 1 | 0 | 0        | G0: |  |
| 0004984 | Olfactory_receptor_activity                                         |   |   |   |   |          |     |  |
| _01     | 7                                                                   | 0 | 1 | 1 | 0 | 0        | G0: |  |
| 0004993 | Serotonin_receptor_activity                                         |   |   |   |   |          |     |  |
| _01     | 5                                                                   | 0 | 1 | 1 | 0 | 0        | G0: |  |
| 0004994 | Somatostatin_receptor_activity                                      |   |   |   |   |          |     |  |
| _01     | 13                                                                  | 0 | 1 | 1 | 0 | 0        | G0: |  |
| 0005001 | Transmembrane_receptor_protein_tyrosine_phosphatase_activity        |   |   |   |   |          |     |  |
| _01     | 7                                                                   | 0 | 1 | 1 | 0 | 0        | G0: |  |
| 0005003 | Ephrin_receptor_activity                                            |   |   |   |   |          |     |  |

|         |                                                                 |   |   |   |   |          |     |
|---------|-----------------------------------------------------------------|---|---|---|---|----------|-----|
| _01     | 5                                                               | 0 | 1 | 1 | 0 | 0        | G0: |
| 0005005 | Transmembrane-ephrin_receptor_activity                          |   |   |   |   |          |     |
| _01     | 7                                                               | 0 | 1 | 1 | 0 | 0        | G0: |
| 0005021 | Vascular_endothelial_growth_factor_receptor_activity            |   |   |   |   |          |     |
| _01     | 8                                                               | 0 | 1 | 1 | 0 | 0        | G0: |
| 0005024 | Transforming_growth_factor_beta_receptor_activity               |   |   |   |   |          |     |
| _01     | 8                                                               | 0 | 1 | 1 | 0 | 0        | G0: |
| 0005031 | Tumor_necrosis_factor_receptor_activity                         |   |   |   |   |          |     |
| _01     | 8                                                               | 0 | 1 | 1 | 0 | 0        | G0: |
| 0005041 | Low-density_lipoprotein_receptor_activity                       |   |   |   |   |          |     |
| _01     | 30                                                              | 0 | 1 | 1 | 0 | 0        | G0: |
| 0005044 | Scavenger_receptor_activity                                     |   |   |   |   |          |     |
| _01     | 26                                                              | 0 | 1 | 1 | 0 | 0        | G0: |
| 0005057 | Receptor_signaling_protein_activity                             |   |   |   |   |          |     |
| _01     | 6                                                               | 0 | 1 | 1 | 0 | 0        | G0: |
| 0005068 | Transmembrane_receptor_protein_tyrosine_kinase_adaptor_activity |   |   |   |   |          |     |
| _01     | 32                                                              | 1 | 1 | 1 | 0 | 4.9e-05  | G0: |
| 0005070 | SH3/SH2_adaptor_activity                                        |   |   |   |   |          |     |
| _01     | 19                                                              | 0 | 1 | 1 | 0 | 0        | G0: |
| 0005080 | Protein_kinase_C_binding                                        |   |   |   |   |          |     |
| _01     | 22                                                              | 0 | 1 | 1 | 0 | 0        | G0: |
| 0005083 | Small_GTPase_regulator_activity                                 |   |   |   |   |          |     |
| _01     | 84                                                              | 0 | 1 | 1 | 0 | 0        | G0: |
| 0005085 | Guanyl-nucleotide_exchange_factor_activity                      |   |   |   |   |          |     |
| _01     | 11                                                              | 0 | 1 | 1 | 0 | 0        | G0: |
| 0005086 | ARF_guanyl-nucleotide_exchange_factor_activity                  |   |   |   |   |          |     |
| _01     | 5                                                               | 0 | 1 | 1 | 0 | 0        | G0: |
| 0005088 | Ras_guanyl-nucleotide_exchange_factor_activity                  |   |   |   |   |          |     |
| _01     | 45                                                              | 0 | 1 | 1 | 0 | 0        | G0: |
| 0005089 | Rho_guanyl-nucleotide_exchange_factor_activity                  |   |   |   |   |          |     |
| _01     | 10                                                              | 0 | 1 | 1 | 0 | 0        | G0: |
| 0005095 | GTPase_inhibitor_activity                                       |   |   |   |   |          |     |
| _01     | 113                                                             | 1 | 1 | 1 | 0 | 4.9e-05  | G0: |
| 0005096 | GTPase_activator_activity                                       |   |   |   |   |          |     |
| _01     | 30                                                              | 0 | 1 | 1 | 0 | 0        | G0: |
| 0005097 | Rab_GTPase_activator_activity                                   |   |   |   |   |          |     |
| _01     | 12                                                              | 0 | 1 | 1 | 0 | 0        | G0: |
| 0005099 | Ras_GTPase_activator_activity                                   |   |   |   |   |          |     |
| _01     | 19                                                              | 0 | 1 | 1 | 0 | 0        | G0: |
| 0005100 | Rho_GTPase_activator_activity                                   |   |   |   |   |          |     |
| _01     | 143                                                             | 0 | 1 | 1 | 0 | 0        | G0: |
| 0005102 | Receptor_binding                                                |   |   |   |   |          |     |
| _01     | 11                                                              | 0 | 1 | 1 | 0 | 0        | G0: |
| 0005104 | Fibroblast_growth_factor_receptor_binding                       |   |   |   |   |          |     |
| _01     | 9                                                               | 0 | 1 | 1 | 0 | 0        | G0: |
| 0005109 | Frizzled_binding                                                |   |   |   |   |          |     |
| _01     | 8                                                               | 0 | 1 | 1 | 0 | 0        | G0: |
| 0005112 | Notch_binding                                                   |   |   |   |   |          |     |
| _01     | 5                                                               | 0 | 1 | 1 | 0 | 0        | G0: |
| 0005114 | Type_II_transforming_growth_factor_beta_receptor_binding        |   |   |   |   |          |     |
| _01     | 6                                                               | 0 | 1 | 1 | 0 | 0        | G0: |
| 0005123 | Death_receptor_binding                                          |   |   |   |   |          |     |
| _01     | 119                                                             | 1 | 1 | 1 | 0 | 0.000423 | G0: |

|         |                                                    |   |   |   |   |          |     |  |
|---------|----------------------------------------------------|---|---|---|---|----------|-----|--|
| 0005125 | Cytokine_activity                                  |   |   |   |   |          |     |  |
| _01     | 9                                                  | 0 | 1 | 1 | 0 | 0        | G0: |  |
| 0005126 | Cytokine_receptor_binding                          |   |   |   |   |          |     |  |
| _01     | 8                                                  | 0 | 1 | 1 | 0 | 0        | G0: |  |
| 0005132 | Interferon-alpha/beta_receptor_binding             |   |   |   |   |          |     |  |
| _01     | 5                                                  | 0 | 1 | 1 | 0 | 0        | G0: |  |
| 0005138 | Interleukin-6_receptor_binding                     |   |   |   |   |          |     |  |
| _01     | 5                                                  | 0 | 1 | 1 | 0 | 0        | G0: |  |
| 0005149 | Interleukin-1_receptor_binding                     |   |   |   |   |          |     |  |
| _01     | 5                                                  | 0 | 1 | 1 | 0 | 0        | G0: |  |
| 0005152 | Interleukin-1_receptor_antagonist_activity         |   |   |   |   |          |     |  |
| _01     | 11                                                 | 0 | 1 | 1 | 0 | 0        | G0: |  |
| 0005154 | Epidermal_growth_factor_receptor_binding           |   |   |   |   |          |     |  |
| _01     | 23                                                 | 0 | 1 | 1 | 0 | 0        | G0: |  |
| 0005158 | Insulin_receptor_binding                           |   |   |   |   |          |     |  |
| _01     | 12                                                 | 0 | 1 | 1 | 0 | 0        | G0: |  |
| 0005159 | Insulin-like_growth_factor_receptor_binding        |   |   |   |   |          |     |  |
| _01     | 8                                                  | 0 | 1 | 1 | 0 | 0        | G0: |  |
| 0005160 | Transforming_growth_factor_beta_receptor_binding   |   |   |   |   |          |     |  |
| _01     | 10                                                 | 0 | 1 | 1 | 0 | 0        | G0: |  |
| 0005161 | Platelet-derived_growth_factor_receptor_binding    |   |   |   |   |          |     |  |
| _01     | 13                                                 | 0 | 1 | 1 | 0 | 0        | G0: |  |
| 0005164 | Tumor_necrosis_factor_receptor_binding             |   |   |   |   |          |     |  |
| _01     | 44                                                 | 0 | 1 | 1 | 0 | 0        | G0: |  |
| 0005178 | Integrin_binding                                   |   |   |   |   |          |     |  |
| _01     | 52                                                 | 0 | 1 | 1 | 0 | 0        | G0: |  |
| 0005179 | Hormone_activity                                   |   |   |   |   |          |     |  |
| _01     | 17                                                 | 0 | 1 | 1 | 0 | 0        | G0: |  |
| 0005184 | Neuropeptide_hormone_activity                      |   |   |   |   |          |     |  |
| _01     | 128                                                | 1 | 1 | 1 | 0 | 6.9e-05  | G0: |  |
| 0005198 | Structural_molecule_activity                       |   |   |   |   |          |     |  |
| _01     | 45                                                 | 0 | 1 | 1 | 0 | 0        | G0: |  |
| 0005200 | Structural_constituent_of_cytoskeleton             |   |   |   |   |          |     |  |
| _01     | 41                                                 | 0 | 1 | 1 | 0 | 0        | G0: |  |
| 0005201 | Extracellular_matrix_structural_constituent        |   |   |   |   |          |     |  |
| _01     | 10                                                 | 0 | 1 | 1 | 0 | 0        | G0: |  |
| 0005212 | Structural_constituent_of_eye_lens                 |   |   |   |   |          |     |  |
| _01     | 173                                                | 1 | 1 | 1 | 0 | 5e-05    | G0: |  |
| 0005215 | Transporter_activity                               |   |   |   |   |          |     |  |
| _01     | 99                                                 | 1 | 1 | 1 | 0 | 0.000423 | G0: |  |
| 0005216 | Ion_channel_activity                               |   |   |   |   |          |     |  |
| _01     | 30                                                 | 0 | 1 | 1 | 0 | 0        | G0: |  |
| 0005230 | Extracellular_ligand-gated_ion_channel_activity    |   |   |   |   |          |     |  |
| _01     | 14                                                 | 0 | 1 | 1 | 0 | 0        | G0: |  |
| 0005234 | Extracellular-glutamate-gated_ion_channel_activity |   |   |   |   |          |     |  |
| _01     | 13                                                 | 0 | 1 | 1 | 0 | 0        | G0: |  |
| 0005242 | Inward_rectifier_potassium_channel_activity        |   |   |   |   |          |     |  |
| _01     | 8                                                  | 0 | 1 | 1 | 0 | 0        | G0: |  |
| 0005243 | Gap_junction_channel_activity                      |   |   |   |   |          |     |  |
| _01     | 105                                                | 0 | 1 | 1 | 0 | 0        | G0: |  |
| 0005244 | Voltage-gated_ion_channel_activity                 |   |   |   |   |          |     |  |
| _01     | 20                                                 | 0 | 1 | 1 | 0 | 0        | G0: |  |
| 0005245 | Voltage-gated_calcium_channel_activity             |   |   |   |   |          |     |  |
| _01     | 11                                                 | 0 | 1 | 1 | 0 | 0        | G0: |  |

|            |                                                |   |          |          |   |   |           |     |
|------------|------------------------------------------------|---|----------|----------|---|---|-----------|-----|
| 0005246    | Calcium_channel_regulator_activity             |   |          |          |   |   |           |     |
| _01        | 7                                              | 0 | 1        | 1        | 0 | 0 |           | GO: |
| 0005247    | Voltage-gated_chloride_channel_activity        |   |          |          |   |   |           |     |
| _01        | 8                                              | 0 | 1        | 1        | 0 | 0 |           | GO: |
| 0005248    | Voltage-gated_sodium_channel_activity          |   |          |          |   |   |           |     |
| _01        | 51                                             | 0 | 1        | 1        | 0 | 0 |           | GO: |
| 0005249    | Voltage-gated_potassium_channel_activity       |   |          |          |   |   |           |     |
| _01        | 7                                              | 0 | 1        | 1        | 0 | 0 |           | GO: |
| 0005251    | Delayed_rectifier_potassium_channel_activity   |   |          |          |   |   |           |     |
| _01        | 40                                             | 0 | 1        | 1        | 0 | 0 |           | GO: |
| 0005254    | Chloride_channel_activity                      |   |          |          |   |   |           |     |
| _01        | 9                                              | 0 | 1        | 1        | 0 | 0 |           | GO: |
| 0005261    | Cation_channel_activity                        |   |          |          |   |   |           |     |
| _01        | 35                                             | 0 | 1        | 1        | 0 | 0 |           | GO: |
| 0005262    | Calcium_channel_activity                       |   |          |          |   |   |           |     |
| _01        | 24                                             | 0 | 1        | 1        | 0 | 0 |           | GO: |
| 0005267    | Potassium_channel_activity                     |   |          |          |   |   |           |     |
| _01        | 7                                              | 0 | 1        | 1        | 0 | 0 |           | GO: |
| 0005272    | Sodium_channel_activity                        |   |          |          |   |   |           |     |
| _01        | 8                                              | 0 | 1        | 1        | 0 | 0 |           | GO: |
| 0005313    | L-glutamate_transmembrane_transporter_activity |   |          |          |   |   |           |     |
| _01        | 10                                             | 0 | 1        | 1        | 0 | 0 |           | GO: |
| 0005319    | Lipid_transporter_activity                     |   |          |          |   |   |           |     |
| _01        | 9                                              | 0 | 1        | 1        | 0 | 0 |           | GO: |
| 0005328    | Neurotransmitter:sodium_symporter_activity     |   |          |          |   |   |           |     |
| _01        | 5                                              | 0 | 1        | 1        | 0 | 0 |           | GO: |
| 0005337    | Nucleoside_transmembrane_transporter_activity  |   |          |          |   |   |           |     |
| _01        | 10                                             | 0 | 1        | 1        | 0 | 0 |           | GO: |
| 0005344    | Oxygen_transporter_activity                    |   |          |          |   |   |           |     |
| _01        | 5                                              | 0 | 1        | 1        | 0 | 0 |           | GO: |
| 0005351    | Sugar:hydrogen_symporter_activity              |   |          |          |   |   |           |     |
| _01        | 7                                              | 0 | 1        | 1        | 0 | 0 |           | GO: |
| 0005355    | Glucose_transmembrane_transporter_activity     |   |          |          |   |   |           |     |
| _01        | 9                                              | 0 | 1        | 1        | 0 | 0 |           | GO: |
| 0005385    | Zinc_ion_transmembrane_transporter_activity    |   |          |          |   |   |           |     |
| _01        | 6                                              | 0 | 1        | 1        | 0 | 0 |           | GO: |
| 0005388    | Calcium-transporting_ATPase_activity           |   |          |          |   |   |           |     |
| _01        | 7                                              | 0 | 1        | 1        | 0 | 0 |           | GO: |
| 0005391    | Sodium:potassium-exchanging_ATPase_activity    |   |          |          |   |   |           |     |
| _01        | 13                                             | 0 | 1        | 1        | 0 | 0 |           | GO: |
| 0005452    | Inorganic_anion_exchanger_activity             |   |          |          |   |   |           |     |
| _01        | 12                                             | 0 | 1        | 1        | 0 | 0 |           | GO: |
| 0005484    | SNAP_receptor_activity                         |   |          |          |   |   |           |     |
| _01        | 5                                              | 0 | 1        | 1        | 0 | 0 |           | GO: |
| 0005487    | Nucleocytoplasmic_transporter_activity         |   |          |          |   |   |           |     |
| _01        | 301                                            | 2 | 0.023215 | 0.609116 | 0 | 0 | 0.0002365 |     |
| G0:0005488 | Binding                                        |   |          |          |   |   |           |     |
| _01        | 15                                             | 1 | 1        | 1        | 0 | 0 | 0.000339  | GO: |
| 0005496    | Steroid_binding                                |   |          |          |   |   |           |     |
| _01        | 6                                              | 0 | 1        | 1        | 0 | 0 |           | GO: |
| 0005501    | Retinoid_binding                               |   |          |          |   |   |           |     |
| _01        | 10                                             | 0 | 1        | 1        | 0 | 0 |           | GO: |
| 0005504    | Fatty_acid_binding                             |   |          |          |   |   |           |     |
| _01        | 45                                             | 0 | 1        | 1        | 0 | 0 |           | GO: |

|            |                                                  |   |          |          |   |             |     |  |
|------------|--------------------------------------------------|---|----------|----------|---|-------------|-----|--|
| 0005506    | Iron_ion_binding                                 |   |          |          |   |             |     |  |
| _01        | 39                                               | 0 | 1        | 1        | 0 | 0           | G0: |  |
| 0005507    | Copper_ion_binding                               |   |          |          |   |             |     |  |
| _01        | 411                                              | 1 | 1        | 1        | 0 | 0.000423    | G0: |  |
| 0005509    | Calcium_ion_binding                              |   |          |          |   |             |     |  |
| _01        | 5                                                | 0 | 1        | 1        | 0 | 0           | G0: |  |
| 0005513    | Detection_of_calcium_ion                         |   |          |          |   |             |     |  |
| _01        | 98                                               | 1 | 1        | 1        | 0 | 6.9e-05     | G0: |  |
| 0005516    | Calmodulin_binding                               |   |          |          |   |             |     |  |
| _01        | 24                                               | 0 | 1        | 1        | 0 | 0           | G0: |  |
| 0005518    | Collagen_binding                                 |   |          |          |   |             |     |  |
| _01        | 17                                               | 0 | 1        | 1        | 0 | 0           | G0: |  |
| 0005520    | Insulin-like_growth_factor_binding               |   |          |          |   |             |     |  |
| _01        | 5                                                | 0 | 1        | 1        | 0 | 0           | G0: |  |
| 0005521    | Lamin_binding                                    |   |          |          |   |             |     |  |
| _01        | 5                                                | 0 | 1        | 1        | 0 | 0           | G0: |  |
| 0005522    | Profilin_binding                                 |   |          |          |   |             |     |  |
| _01        | 11                                               | 0 | 1        | 1        | 0 | 0           | G0: |  |
| 0005523    | Tropomyosin_binding                              |   |          |          |   |             |     |  |
| _01        | 909                                              | 3 | 0.047166 | 0.706319 | 0 | 5.36667e-05 |     |  |
| G0:0005524 | ATP_binding                                      |   |          |          |   |             |     |  |
| _01        | 239                                              | 1 | 1        | 1        | 0 | 0.000423    | G0: |  |
| 0005525    | GTP_binding                                      |   |          |          |   |             |     |  |
| _01        | 6                                                | 0 | 1        | 1        | 0 | 0           | G0: |  |
| 0005528    | FK506_binding                                    |   |          |          |   |             |     |  |
| _01        | 90                                               | 0 | 1        | 1        | 0 | 0           | G0: |  |
| 0005529    | Sugar_binding                                    |   |          |          |   |             |     |  |
| _01        | 8                                                | 0 | 1        | 1        | 0 | 0           | G0: |  |
| 0005537    | Mannose_binding                                  |   |          |          |   |             |     |  |
| _01        | 13                                               | 1 | 1        | 1        | 0 | 0.000339    | G0: |  |
| 0005539    | Glycosaminoglycan_binding                        |   |          |          |   |             |     |  |
| _01        | 16                                               | 0 | 1        | 1        | 0 | 0           | G0: |  |
| 0005540    | Hyaluronic_acid_binding                          |   |          |          |   |             |     |  |
| _01        | 10                                               | 0 | 1        | 1        | 0 | 0           | G0: |  |
| 0005542    | Folic_acid_binding                               |   |          |          |   |             |     |  |
| _01        | 34                                               | 0 | 1        | 1        | 0 | 0           | G0: |  |
| 0005543    | Phospholipid_binding                             |   |          |          |   |             |     |  |
| _01        | 19                                               | 1 | 1        | 1        | 0 | 5e-05       | G0: |  |
| 0005544    | Calcium-dependent_phospholipid_binding           |   |          |          |   |             |     |  |
| _01        | 11                                               | 0 | 1        | 1        | 0 | 0           | G0: |  |
| 0005545    | Phosphatidylinositol_binding                     |   |          |          |   |             |     |  |
| _01        | 13                                               | 0 | 1        | 1        | 0 | 0           | G0: |  |
| 0005546    | Phosphatidylinositol-4,5-bisphosphate_binding    |   |          |          |   |             |     |  |
| _01        | 12                                               | 0 | 1        | 1        | 0 | 0           | G0: |  |
| 0005547    | Phosphatidylinositol-3,4,5-trisphosphate_binding |   |          |          |   |             |     |  |
| _01        | 345                                              | 2 | 0.030622 | 0.642941 | 0 | 0.0002435   |     |  |
| G0:0005575 | Cellular_component                               |   |          |          |   |             |     |  |
| _01        | 5                                                | 0 | 1        | 1        | 0 | 0           | G0: |  |
| 0005577    | Fibrinogen_complex                               |   |          |          |   |             |     |  |
| _01        | 166                                              | 2 | 0.011648 | 0.508221 | 0 | 0.000211    | G0: |  |
| 0005578    | Proteinaceous_extracellular_matrix               |   |          |          |   |             |     |  |
| _01        | 7                                                | 0 | 1        | 1        | 0 | 0           | G0: |  |
| 0005579    | Membrane_attack_complex                          |   |          |          |   |             |     |  |
| _01        | 15                                               | 0 | 1        | 1        | 0 | 0           | G0: |  |

|            |                                                   |   |          |          |   |   |             |     |
|------------|---------------------------------------------------|---|----------|----------|---|---|-------------|-----|
| 0005581    | Collagen                                          |   |          |          |   |   |             |     |
| _01        | 45                                                | 0 | 1        | 1        | 0 | 0 | 0           | G0: |
| 0005604    | Basement_membrane                                 |   |          |          |   |   |             |     |
| _01        | 10                                                | 0 | 1        | 1        | 0 | 0 | 0           | G0: |
| 0005605    | Basal_lamina                                      |   |          |          |   |   |             |     |
| _01        | 6                                                 | 0 | 1        | 1        | 0 | 0 | 0           | G0: |
| 0005606    | Laminin-1_complex                                 |   |          |          |   |   |             |     |
| _01        | 499                                               | 3 | 0.003443 | 0.308913 | 0 | 0 | 0.000281667 |     |
| G0:0005615 | Extracellular_space                               |   |          |          |   |   |             |     |
| _01        | 323                                               | 0 | 1        | 1        | 0 | 0 | 0           | G0: |
| 0005624    | Membrane_fraction                                 |   |          |          |   |   |             |     |
| _01        | 197                                               | 0 | 1        | 1        | 0 | 0 | 0           | G0: |
| 0005625    | Soluble_fraction                                  |   |          |          |   |   |             |     |
| _01        | 22                                                | 0 | 1        | 1        | 0 | 0 | 0           | G0: |
| 0005626    | Insoluble_fraction                                |   |          |          |   |   |             |     |
| _01        | 64                                                | 0 | 1        | 1        | 0 | 0 | 0           | G0: |
| 0005635    | Nuclear_envelope                                  |   |          |          |   |   |             |     |
| _01        | 22                                                | 0 | 1        | 1        | 0 | 0 | 0           | G0: |
| 0005637    | Nuclear_inner_membrane                            |   |          |          |   |   |             |     |
| _01        | 15                                                | 0 | 1        | 1        | 0 | 0 | 0           | G0: |
| 0005640    | Nuclear_outer_membrane                            |   |          |          |   |   |             |     |
| _01        | 38                                                | 0 | 1        | 1        | 0 | 0 | 0           | G0: |
| 0005643    | Nuclear_pore                                      |   |          |          |   |   |             |     |
| _01        | 498                                               | 3 | 0.002715 | 0.281437 | 0 | 0 | 0.000183    | G0: |
| 0005654    | Nucleoplasm                                       |   |          |          |   |   |             |     |
| _01        | 5                                                 | 0 | 1        | 1        | 0 | 0 | 0           | G0: |
| 0005655    | Nucleolar_ribonuclease_P_complex                  |   |          |          |   |   |             |     |
| _01        | 6                                                 | 0 | 1        | 1        | 0 | 0 | 0           | G0: |
| 0005657    | Replication_fork                                  |   |          |          |   |   |             |     |
| _01        | 5                                                 | 0 | 1        | 1        | 0 | 0 | 0           | G0: |
| 0005658    | Alpha_DNA_polymerase:primase_complex              |   |          |          |   |   |             |     |
| _01        | 7                                                 | 0 | 1        | 1        | 0 | 0 | 0           | G0: |
| 0005664    | Nuclear_origin_of_replication_recognition_complex |   |          |          |   |   |             |     |
| _01        | 9                                                 | 0 | 1        | 1        | 0 | 0 | 0           | G0: |
| 0005665    | DNA-directed_RNA_polymerase_II,_core_complex      |   |          |          |   |   |             |     |
| _01        | 5                                                 | 0 | 1        | 1        | 0 | 0 | 0           | G0: |
| 0005666    | DNA-directed_RNA_polymerase_III_complex           |   |          |          |   |   |             |     |
| _01        | 124                                               | 3 | 0.000119 | 0.045301 | 0 | 0 | 0.000157    | G0: |
| 0005667    | Transcription_factor_complex                      |   |          |          |   |   |             |     |
| _01        | 10                                                | 0 | 1        | 1        | 0 | 0 | 0           | G0: |
| 0005669    | Transcription_factor_TFIID_complex                |   |          |          |   |   |             |     |
| _01        | 11                                                | 0 | 1        | 1        | 0 | 0 | 0           | G0: |
| 0005671    | Ada2/Gcn5/Ada3_transcription_activator_complex    |   |          |          |   |   |             |     |
| _01        | 5                                                 | 0 | 1        | 1        | 0 | 0 | 0           | G0: |
| 0005675    | Holo_TFIIF_complex                                |   |          |          |   |   |             |     |
| _01        | 20                                                | 1 | 1        | 1        | 0 | 0 | 0.000423    | G0: |
| 0005680    | Anaphase-promoting_complex                        |   |          |          |   |   |             |     |
| _01        | 87                                                | 0 | 1        | 1        | 0 | 0 | 0           | G0: |
| 0005681    | Spliceosomal_complex                              |   |          |          |   |   |             |     |
| _01        | 14                                                | 0 | 1        | 1        | 0 | 0 | 0           | G0: |
| 0005689    | U12-type_spliceosomal_complex                     |   |          |          |   |   |             |     |
| _01        | 70                                                | 1 | 1        | 1        | 0 | 0 | 0.000423    | G0: |
| 0005694    | Chromosome                                        |   |          |          |   |   |             |     |
| _01        | 9                                                 | 1 | 1        | 1        | 0 | 0 | 7.4e-05     | G0: |

|         |                                                              |           |          |          |   |            |     |
|---------|--------------------------------------------------------------|-----------|----------|----------|---|------------|-----|
| 0005720 | Nuclear_heterochromatin                                      |           |          |          |   |            |     |
| _01     | 697                                                          | 4         | 0.001055 | 0.172897 | 0 | 0.00021725 |     |
| G0:     | 0005730                                                      | Nucleolus |          |          |   |            |     |
| _01     | 6                                                            | 0         | 1        | 1        | 0 | 0          | G0: |
| 0005732 | Small_nucleolar_ribonucleoprotein_complex                    |           |          |          |   |            |     |
| _01     | 790                                                          | 1         | 1        | 1        | 0 | 0.000423   | G0: |
| 0005739 | Mitochondrion                                                |           |          |          |   |            |     |
| _01     | 11                                                           | 0         | 1        | 1        | 0 | 0          | G0: |
| 0005740 | Mitochondrial_envelope                                       |           |          |          |   |            |     |
| _01     | 58                                                           | 0         | 1        | 1        | 0 | 0          | G0: |
| 0005741 | Mitochondrial_outer_membrane                                 |           |          |          |   |            |     |
| _01     | 5                                                            | 0         | 1        | 1        | 0 | 0          | G0: |
| 0005742 | Mitochondrial_outer_membrane_translocase_complex             |           |          |          |   |            |     |
| _01     | 160                                                          | 0         | 1        | 1        | 0 | 0          | G0: |
| 0005743 | Mitochondrial_inner_membrane                                 |           |          |          |   |            |     |
| _01     | 5                                                            | 0         | 1        | 1        | 0 | 0          | G0: |
| 0005744 | Mitochondrial_inner_membrane_presequence_translocase_complex |           |          |          |   |            |     |
| _01     | 8                                                            | 0         | 1        | 1        | 0 | 0          | G0: |
| 0005746 | Mitochondrial_respiratory_chain                              |           |          |          |   |            |     |
| _01     | 19                                                           | 0         | 1        | 1        | 0 | 0          | G0: |
| 0005747 | Mitochondrial_respiratory_chain_complex_I                    |           |          |          |   |            |     |
| _01     | 10                                                           | 0         | 1        | 1        | 0 | 0          | G0: |
| 0005753 | Mitochondrial_proton-transporting_ATP_synthase_complex       |           |          |          |   |            |     |
| _01     | 19                                                           | 1         | 1        | 1        | 0 | 0.000423   | G0: |
| 0005758 | Mitochondrial_intermembrane_space                            |           |          |          |   |            |     |
| _01     | 111                                                          | 0         | 1        | 1        | 0 | 0          | G0: |
| 0005759 | Mitochondrial_matrix                                         |           |          |          |   |            |     |
| _01     | 13                                                           | 0         | 1        | 1        | 0 | 0          | G0: |
| 0005761 | Mitochondrial_ribosome                                       |           |          |          |   |            |     |
| _01     | 13                                                           | 0         | 1        | 1        | 0 | 0          | G0: |
| 0005762 | Mitochondrial_large_ribosomal_subunit                        |           |          |          |   |            |     |
| _01     | 10                                                           | 0         | 1        | 1        | 0 | 0          | G0: |
| 0005763 | Mitochondrial_small_ribosomal_subunit                        |           |          |          |   |            |     |
| _01     | 104                                                          | 1         | 1        | 1        | 0 | 5e-05      | G0: |
| 0005764 | Lysosome                                                     |           |          |          |   |            |     |
| _01     | 62                                                           | 0         | 1        | 1        | 0 | 0          | G0: |
| 0005765 | Lysosomal_membrane                                           |           |          |          |   |            |     |
| _01     | 142                                                          | 0         | 1        | 1        | 0 | 0          | G0: |
| 0005768 | Endosome                                                     |           |          |          |   |            |     |
| _01     | 54                                                           | 0         | 1        | 1        | 0 | 0          | G0: |
| 0005769 | Early_endosome                                               |           |          |          |   |            |     |
| _01     | 26                                                           | 0         | 1        | 1        | 0 | 0          | G0: |
| 0005770 | Late_endosome                                                |           |          |          |   |            |     |
| _01     | 8                                                            | 0         | 1        | 1        | 0 | 0          | G0: |
| 0005771 | Multivesicular_body                                          |           |          |          |   |            |     |
| _01     | 6                                                            | 0         | 1        | 1        | 0 | 0          | G0: |
| 0005773 | Vacuole                                                      |           |          |          |   |            |     |
| _01     | 6                                                            | 0         | 1        | 1        | 0 | 0          | G0: |
| 0005774 | Vacuolar_membrane                                            |           |          |          |   |            |     |
| _01     | 8                                                            | 0         | 1        | 1        | 0 | 0          | G0: |
| 0005776 | Autophagic_vacuole                                           |           |          |          |   |            |     |
| _01     | 57                                                           | 0         | 1        | 1        | 0 | 0          | G0: |
| 0005777 | Peroxisome                                                   |           |          |          |   |            |     |
| _01     | 20                                                           | 0         | 1        | 1        | 0 | 0          | G0: |

|            |                                                              |   |           |          |          |          |          |  |
|------------|--------------------------------------------------------------|---|-----------|----------|----------|----------|----------|--|
| 0005778    | Peroxisomal_membrane                                         |   |           |          |          |          |          |  |
| _01        | 8                                                            | 0 | 1         | 1        | 0        | 0        | G0:      |  |
| 0005779    | Integral_to_peroxisomal_membrane                             |   |           |          |          |          |          |  |
| _01        | 18                                                           | 0 | 1         | 1        | 0        | 0        | G0:      |  |
| 0005782    | Peroxisomal_matrix                                           |   |           |          |          |          |          |  |
| _01        | 575                                                          | 2 | 0.0593539 |          | 0.722286 | 0        | 4.45e-05 |  |
| G0:0005783 | Endoplasmic_reticulum                                        |   |           |          |          |          |          |  |
| _01        | 5                                                            | 0 | 1         | 1        | 0        | 0        | G0:      |  |
| 0005786    | Signal_recognition_particle,_endoplasmic_reticulum_targeting |   |           |          |          |          |          |  |
| _01        | 59                                                           | 1 | 1         | 1        | 0        | 3.9e-05  | G0:      |  |
| 0005788    | Endoplasmic_reticulum_lumen                                  |   |           |          |          |          |          |  |
| _01        | 355                                                          | 1 | 1         | 1        | 0        | 3.9e-05  | G0:      |  |
| 0005789    | Endoplasmic_reticulum_membrane                               |   |           |          |          |          |          |  |
| _01        | 6                                                            | 0 | 1         | 1        | 0        | 0        | G0:      |  |
| 0005790    | Smooth_endoplasmic_reticulum                                 |   |           |          |          |          |          |  |
| _01        | 14                                                           | 0 | 1         | 1        | 0        | 0        | G0:      |  |
| 0005791    | Rough_endoplasmic_reticulum                                  |   |           |          |          |          |          |  |
| _01        | 126                                                          | 1 | 1         | 1        | 0        | 3.9e-05  | G0:      |  |
| 0005792    | Microsome                                                    |   |           |          |          |          |          |  |
| _01        | 28                                                           | 0 | 1         | 1        | 0        | 0        | G0:      |  |
| 0005793    | ER-Golgi_intermediate_compartment                            |   |           |          |          |          |          |  |
| _01        | 574                                                          | 1 | 1         | 1        | 0        | 0.000423 | G0:      |  |
| 0005794    | Golgi_apparatus                                              |   |           |          |          |          |          |  |
| _01        | 17                                                           | 0 | 1         | 1        | 0        | 0        | G0:      |  |
| 0005795    | Golgi_stack                                                  |   |           |          |          |          |          |  |
| _01        | 11                                                           | 0 | 1         | 1        | 0        | 0        | G0:      |  |
| 0005796    | Golgi_lumen                                                  |   |           |          |          |          |          |  |
| _01        | 8                                                            | 0 | 1         | 1        | 0        | 0        | G0:      |  |
| 0005798    | Golgi-associated_vesicle                                     |   |           |          |          |          |          |  |
| _01        | 13                                                           | 0 | 1         | 1        | 0        | 0        | G0:      |  |
| 0005801    | Cis-Golgi_network                                            |   |           |          |          |          |          |  |
| _01        | 40                                                           | 0 | 1         | 1        | 0        | 0        | G0:      |  |
| 0005802    | Trans-Golgi_network                                          |   |           |          |          |          |          |  |
| _01        | 15                                                           | 0 | 1         | 1        | 0        | 0        | G0:      |  |
| 0005811    | Lipid_particle                                               |   |           |          |          |          |          |  |
| _01        | 113                                                          | 2 | 0.00338   | 0.307749 | 0        | 5.1e-05  | G0:      |  |
| 0005813    | Centrosome                                                   |   |           |          |          |          |          |  |
| _01        | 26                                                           | 0 | 1         | 1        | 0        | 0        | G0:      |  |
| 0005814    | Centriole                                                    |   |           |          |          |          |          |  |
| _01        | 64                                                           | 0 | 1         | 1        | 0        | 0        | G0:      |  |
| 0005815    | Microtubule_organizing_center                                |   |           |          |          |          |          |  |
| _01        | 65                                                           | 0 | 1         | 1        | 0        | 0        | G0:      |  |
| 0005819    | Spindle                                                      |   |           |          |          |          |          |  |
| _01        | 5                                                            | 0 | 1         | 1        | 0        | 0        | G0:      |  |
| 0005832    | Chaperonin-containing_T-complex                              |   |           |          |          |          |          |  |
| _01        | 9                                                            | 0 | 1         | 1        | 0        | 0        | G0:      |  |
| 0005833    | Hemoglobin_complex                                           |   |           |          |          |          |          |  |
| _01        | 20                                                           | 0 | 1         | 1        | 0        | 0        | G0:      |  |
| 0005834    | Heterotrimeric_G-protein_complex                             |   |           |          |          |          |          |  |
| _01        | 5                                                            | 0 | 1         | 1        | 0        | 0        | G0:      |  |
| 0005838    | Proteasome_regulatory_particle                               |   |           |          |          |          |          |  |
| _01        | 9                                                            | 0 | 1         | 1        | 0        | 0        | G0:      |  |
| 0005839    | Proteasome_core_complex                                      |   |           |          |          |          |          |  |
| _01        | 107                                                          | 0 | 1         | 1        | 0        | 0        | G0:      |  |



|             |                                                        |              |            |          |   |           |  |     |
|-------------|--------------------------------------------------------|--------------|------------|----------|---|-----------|--|-----|
| 0005840     | Ribosome                                               |              |            |          |   |           |  |     |
| _01         | 8                                                      | 0            | 1          | 1        | 0 | 0         |  | GO: |
| 0005844     | Polysome                                               |              |            |          |   |           |  |     |
| _01         | 6                                                      | 0            | 1          | 1        | 0 | 0         |  | GO: |
| 0005845     | MRNA_cap_binding_complex                               |              |            |          |   |           |  |     |
| _01         | 7                                                      | 0            | 1          | 1        | 0 | 0         |  | GO: |
| 0005852     | Eukaryotic_translation_initiation_factor_3_complex     |              |            |          |   |           |  |     |
| _01         | 439                                                    | 3            | 0.00865799 | 0.456225 | 0 | 0         |  |     |
| 0.000180667 | GO:0005856                                             | Cytoskeleton |            |          |   |           |  |     |
| _01         | 7                                                      | 0            | 1          | 1        | 0 | 0         |  | GO: |
| 0005858     | Axonemal_dynein_complex                                |              |            |          |   |           |  |     |
| _01         | 14                                                     | 0            | 1          | 1        | 0 | 0         |  | GO: |
| 0005859     | Muscle_myosin_complex                                  |              |            |          |   |           |  |     |
| _01         | 7                                                      | 0            | 1          | 1        | 0 | 0         |  | GO: |
| 0005861     | Troponin_complex                                       |              |            |          |   |           |  |     |
| _01         | 8                                                      | 0            | 1          | 1        | 0 | 0         |  | GO: |
| 0005868     | Cytoplasmic_dynein_complex                             |              |            |          |   |           |  |     |
| _01         | 9                                                      | 0            | 1          | 1        | 0 | 0         |  | GO: |
| 0005871     | Kinesin_complex                                        |              |            |          |   |           |  |     |
| _01         | 145                                                    | 0            | 1          | 1        | 0 | 0         |  | GO: |
| 0005874     | Microtubule                                            |              |            |          |   |           |  |     |
| _01         | 11                                                     | 0            | 1          | 1        | 0 | 0         |  | GO: |
| 0005875     | Microtubule_associated_complex                         |              |            |          |   |           |  |     |
| _01         | 17                                                     | 0            | 1          | 1        | 0 | 0         |  | GO: |
| 0005876     | Spindle_microtubule                                    |              |            |          |   |           |  |     |
| _01         | 15                                                     | 0            | 1          | 1        | 0 | 0         |  | GO: |
| 0005881     | Cytoplasmic_microtubule                                |              |            |          |   |           |  |     |
| _01         | 43                                                     | 0            | 1          | 1        | 0 | 0         |  | GO: |
| 0005882     | Intermediate_filament                                  |              |            |          |   |           |  |     |
| _01         | 5                                                      | 0            | 1          | 1        | 0 | 0         |  | GO: |
| 0005883     | Neurofilament                                          |              |            |          |   |           |  |     |
| _01         | 21                                                     | 0            | 1          | 1        | 0 | 0         |  | GO: |
| 0005884     | Actin_filament                                         |              |            |          |   |           |  |     |
| _01         | 646                                                    | 2            | 0.111196   | 0.827606 | 0 | 0.0002375 |  |     |
| GO:0005887  | Integral_to_plasma_membrane                            |              |            |          |   |           |  |     |
| _01         | 6                                                      | 0            | 1          | 1        | 0 | 0         |  | GO: |
| 0005890     | Sodium:potassium-exchanging_ATPase_complex             |              |            |          |   |           |  |     |
| _01         | 17                                                     | 0            | 1          | 1        | 0 | 0         |  | GO: |
| 0005891     | Voltage-gated_calcium_channel_complex                  |              |            |          |   |           |  |     |
| _01         | 12                                                     | 0            | 1          | 1        | 0 | 0         |  | GO: |
| 0005892     | Nicotinic_acetylcholine-gated_receptor-channel_complex |              |            |          |   |           |  |     |
| _01         | 35                                                     | 1            | 1          | 1        | 0 | 3.9e-05   |  | GO: |
| 0005901     | Caveola                                                |              |            |          |   |           |  |     |
| _01         | 17                                                     | 0            | 1          | 1        | 0 | 0         |  | GO: |
| 0005902     | Microvillus                                            |              |            |          |   |           |  |     |
| _01         | 12                                                     | 0            | 1          | 1        | 0 | 0         |  | GO: |
| 0005903     | Brush_border                                           |              |            |          |   |           |  |     |
| _01         | 32                                                     | 0            | 1          | 1        | 0 | 0         |  | GO: |
| 0005905     | Coated_pit                                             |              |            |          |   |           |  |     |
| _01         | 45                                                     | 0            | 1          | 1        | 0 | 0         |  | GO: |
| 0005911     | Cell-cell_junction                                     |              |            |          |   |           |  |     |
| _01         | 22                                                     | 0            | 1          | 1        | 0 | 0         |  | GO: |
| 0005912     | Adherens_junction                                      |              |            |          |   |           |  |     |
| _01         | 20                                                     | 0            | 1          | 1        | 0 | 0         |  | GO: |

|            |                                                |   |          |          |   |           |     |  |
|------------|------------------------------------------------|---|----------|----------|---|-----------|-----|--|
| 0005913    | Cell-cell_adherens_junction                    |   |          |          |   |           |     |  |
| _01        | 5                                              | 0 | 1        | 1        | 0 | 0         | G0: |  |
| 0005915    | Zonula_adherens                                |   |          |          |   |           |     |  |
| _01        | 7                                              | 0 | 1        | 1        | 0 | 0         | G0: |  |
| 0005916    | Fascia_adherens                                |   |          |          |   |           |     |  |
| _01        | 12                                             | 0 | 1        | 1        | 0 | 0         | G0: |  |
| 0005921    | Gap_junction                                   |   |          |          |   |           |     |  |
| _01        | 14                                             | 0 | 1        | 1        | 0 | 0         | G0: |  |
| 0005922    | Connexon_complex                               |   |          |          |   |           |     |  |
| _01        | 53                                             | 0 | 1        | 1        | 0 | 0         | G0: |  |
| 0005923    | Tight_junction                                 |   |          |          |   |           |     |  |
| _01        | 71                                             | 1 | 1        | 1        | 0 | 0.000344  | G0: |  |
| 0005925    | Focal_adhesion                                 |   |          |          |   |           |     |  |
| _01        | 63                                             | 0 | 1        | 1        | 0 | 0         | G0: |  |
| 0005929    | Cilium                                         |   |          |          |   |           |     |  |
| _01        | 28                                             | 0 | 1        | 1        | 0 | 0         | G0: |  |
| 0005932    | Microtubule_basal_body                         |   |          |          |   |           |     |  |
| _01        | 56                                             | 0 | 1        | 1        | 0 | 0         | G0: |  |
| 0005938    | Cell_cortex                                    |   |          |          |   |           |     |  |
| _01        | 7                                              | 0 | 1        | 1        | 0 | 0         | G0: |  |
| 0005942    | Phosphoinositide_3-kinase_complex              |   |          |          |   |           |     |  |
| _01        | 5                                              | 0 | 1        | 1        | 0 | 0         | G0: |  |
| 0005952    | CAMP-dependent_protein_kinase_complex          |   |          |          |   |           |     |  |
| _01        | 177                                            | 2 | 0.004555 | 0.35498  | 0 | 5.1e-05   | G0: |  |
| 0005975    | Carbohydrate_metabolic_process                 |   |          |          |   |           |     |  |
| _01        | 17                                             | 0 | 1        | 1        | 0 | 0         | G0: |  |
| 0005977    | Glycogen_metabolic_process                     |   |          |          |   |           |     |  |
| _01        | 8                                              | 0 | 1        | 1        | 0 | 0         | G0: |  |
| 0005978    | Glycogen_biosynthetic_process                  |   |          |          |   |           |     |  |
| _01        | 13                                             | 0 | 1        | 1        | 0 | 0         | G0: |  |
| 0005980    | Glycogen_catabolic_process                     |   |          |          |   |           |     |  |
| _01        | 5                                              | 1 | 1        | 1        | 0 | 5e-05     | G0: |  |
| 0006000    | Fructose_metabolic_process                     |   |          |          |   |           |     |  |
| _01        | 60                                             | 2 | 0.000428 | 0.104867 | 0 | 0.0001945 |     |  |
| G0:0006006 | Glucose_metabolic_process                      |   |          |          |   |           |     |  |
| _01        | 5                                              | 0 | 1        | 1        | 0 | 0         | G0: |  |
| 0006013    | Mannose_metabolic_process                      |   |          |          |   |           |     |  |
| _01        | 9                                              | 0 | 1        | 1        | 0 | 0         | G0: |  |
| 0006024    | Glycosaminoglycan_biosynthetic_process         |   |          |          |   |           |     |  |
| _01        | 9                                              | 0 | 1        | 1        | 0 | 0         | G0: |  |
| 0006044    | N-acetylglucosamine_metabolic_process          |   |          |          |   |           |     |  |
| _01        | 9                                              | 0 | 1        | 1        | 0 | 0         | G0: |  |
| 0006071    | Glycerol_metabolic_process                     |   |          |          |   |           |     |  |
| _01        | 7                                              | 0 | 1        | 1        | 0 | 0         | G0: |  |
| 0006081    | Cellular_aldehyde_metabolic_process            |   |          |          |   |           |     |  |
| _01        | 13                                             | 0 | 1        | 1        | 0 | 0         | G0: |  |
| 0006090    | Pyruvate_metabolic_process                     |   |          |          |   |           |     |  |
| _01        | 43                                             | 0 | 1        | 1        | 0 | 0         | G0: |  |
| 0006091    | Generation_of_precursor_metabolites_and_energy |   |          |          |   |           |     |  |
| _01        | 25                                             | 1 | 1        | 1        | 0 | 5e-05     | G0: |  |
| 0006094    | Gluconeogenesis                                |   |          |          |   |           |     |  |
| _01        | 23                                             | 1 | 1        | 1        | 0 | 5e-05     | G0: |  |
| 0006096    | Glycolysis                                     |   |          |          |   |           |     |  |
| _01        | 5                                              | 0 | 1        | 1        | 0 | 0         | G0: |  |

|         |                                                                         |   |   |   |   |   |     |  |
|---------|-------------------------------------------------------------------------|---|---|---|---|---|-----|--|
| 0006098 | Pentose-phosphate_shunt                                                 |   |   |   |   |   |     |  |
| _01     | 16                                                                      | 0 | 1 | 1 | 0 | 0 | G0: |  |
| 0006099 | Tricarboxylic_acid_cycle                                                |   |   |   |   |   |     |  |
| _01     | 7                                                                       | 0 | 1 | 1 | 0 | 0 | G0: |  |
| 0006101 | Citrate_metabolic_process                                               |   |   |   |   |   |     |  |
| _01     | 11                                                                      | 0 | 1 | 1 | 0 | 0 | G0: |  |
| 0006103 | 2-oxoglutarate_metabolic_process                                        |   |   |   |   |   |     |  |
| _01     | 9                                                                       | 0 | 1 | 1 | 0 | 0 | G0: |  |
| 0006107 | Oxaloacetate_metabolic_process                                          |   |   |   |   |   |     |  |
| _01     | 7                                                                       | 0 | 1 | 1 | 0 | 0 | G0: |  |
| 0006108 | Malate_metabolic_process                                                |   |   |   |   |   |     |  |
| _01     | 71                                                                      | 0 | 1 | 1 | 0 | 0 | G0: |  |
| 0006112 | Energy_reserve_metabolic_process                                        |   |   |   |   |   |     |  |
| _01     | 19                                                                      | 0 | 1 | 1 | 0 | 0 | G0: |  |
| 0006120 | Mitochondrial_electron_transport,_NADH_to_ubiquinone                    |   |   |   |   |   |     |  |
| _01     | 34                                                                      | 0 | 1 | 1 | 0 | 0 | G0: |  |
| 0006139 | Nucleobase,_nucleoside,_nucleotide_and_nucleic_acid_metabolic_processes |   |   |   |   |   |     |  |
| _01     | 27                                                                      | 0 | 1 | 1 | 0 | 0 | G0: |  |
| 0006144 | Purine_base_metabolic_process                                           |   |   |   |   |   |     |  |
| _01     | 12                                                                      | 0 | 1 | 1 | 0 | 0 | G0: |  |
| 0006164 | Purine_nucleotide_biosynthetic_process                                  |   |   |   |   |   |     |  |
| _01     | 8                                                                       | 0 | 1 | 1 | 0 | 0 | G0: |  |
| 0006182 | CGMP_biosynthetic_process                                               |   |   |   |   |   |     |  |
| _01     | 6                                                                       | 0 | 1 | 1 | 0 | 0 | G0: |  |
| 0006183 | GTP_biosynthetic_process                                                |   |   |   |   |   |     |  |
| _01     | 10                                                                      | 0 | 1 | 1 | 0 | 0 | G0: |  |
| 0006195 | Purine_nucleotide_catabolic_process                                     |   |   |   |   |   |     |  |
| _01     | 5                                                                       | 0 | 1 | 1 | 0 | 0 | G0: |  |
| 0006200 | ATP_catabolic_process                                                   |   |   |   |   |   |     |  |
| _01     | 15                                                                      | 0 | 1 | 1 | 0 | 0 | G0: |  |
| 0006206 | Pyrimidine_base_metabolic_process                                       |   |   |   |   |   |     |  |
| _01     | 6                                                                       | 0 | 1 | 1 | 0 | 0 | G0: |  |
| 0006228 | UTP_biosynthetic_process                                                |   |   |   |   |   |     |  |
| _01     | 7                                                                       | 0 | 1 | 1 | 0 | 0 | G0: |  |
| 0006241 | CTP_biosynthetic_process                                                |   |   |   |   |   |     |  |
| _01     | 14                                                                      | 0 | 1 | 1 | 0 | 0 | G0: |  |
| 0006259 | DNA_metabolic_process                                                   |   |   |   |   |   |     |  |
| _01     | 93                                                                      | 0 | 1 | 1 | 0 | 0 | G0: |  |
| 0006260 | DNA_replication                                                         |   |   |   |   |   |     |  |
| _01     | 8                                                                       | 0 | 1 | 1 | 0 | 0 | G0: |  |
| 0006261 | DNA-dependent_DNA_replication                                           |   |   |   |   |   |     |  |
| _01     | 7                                                                       | 0 | 1 | 1 | 0 | 0 | G0: |  |
| 0006265 | DNA_topological_change                                                  |   |   |   |   |   |     |  |
| _01     | 7                                                                       | 0 | 1 | 1 | 0 | 0 | G0: |  |
| 0006268 | DNA_unwinding_involved_in_replication                                   |   |   |   |   |   |     |  |
| _01     | 15                                                                      | 0 | 1 | 1 | 0 | 0 | G0: |  |
| 0006270 | DNA-dependent_DNA_replication_initiation                                |   |   |   |   |   |     |  |
| _01     | 21                                                                      | 0 | 1 | 1 | 0 | 0 | G0: |  |
| 0006271 | DNA_strand_elongation_involved_in_DNA_replication                       |   |   |   |   |   |     |  |
| _01     | 8                                                                       | 0 | 1 | 1 | 0 | 0 | G0: |  |
| 0006275 | Regulation_of_DNA_replication                                           |   |   |   |   |   |     |  |
| _01     | 159                                                                     | 0 | 1 | 1 | 0 | 0 | G0: |  |

|            |                                                             |   |         |            |   |          |  |     |
|------------|-------------------------------------------------------------|---|---------|------------|---|----------|--|-----|
| 0006281    | DNA_repair                                                  |   |         |            |   |          |  |     |
| _01        | 23                                                          | 0 | 1       | 1          | 0 | 0        |  | GO: |
| 0006283    | Transcription-coupled_nucleotide-excision_repair            |   |         |            |   |          |  |     |
| _01        | 21                                                          | 0 | 1       | 1          | 0 | 0        |  | GO: |
| 0006284    | Base-excision_repair                                        |   |         |            |   |          |  |     |
| _01        | 6                                                           | 0 | 1       | 1          | 0 | 0        |  | GO: |
| 0006285    | Base-excision_repair,_AP_site_formation                     |   |         |            |   |          |  |     |
| _01        | 37                                                          | 0 | 1       | 1          | 0 | 0        |  | GO: |
| 0006289    | Nucleotide-excision_repair                                  |   |         |            |   |          |  |     |
| _01        | 10                                                          | 0 | 1       | 1          | 0 | 0        |  | GO: |
| 0006297    | Nucleotide-excision_repair,_DNA_gap_filling                 |   |         |            |   |          |  |     |
| _01        | 12                                                          | 0 | 1       | 1          | 0 | 0        |  | GO: |
| 0006298    | Mismatch_repair                                             |   |         |            |   |          |  |     |
| _01        | 22                                                          | 0 | 1       | 1          | 0 | 0        |  | GO: |
| 0006302    | Double-strand_break_repair                                  |   |         |            |   |          |  |     |
| _01        | 5                                                           | 0 | 1       | 1          | 0 | 0        |  | GO: |
| 0006303    | Double-strand_break_repair_via_nonhomologous_end_joining    |   |         |            |   |          |  |     |
| _01        | 10                                                          | 0 | 1       | 1          | 0 | 0        |  | GO: |
| 0006306    | DNA_methylation                                             |   |         |            |   |          |  |     |
| _01        | 17                                                          | 0 | 1       | 1          | 0 | 0        |  | GO: |
| 0006309    | DNA_fragmentation_involved_in_apoptotic_nuclear_change      |   |         |            |   |          |  |     |
| _01        | 39                                                          | 0 | 1       | 1          | 0 | 0        |  | GO: |
| 0006310    | DNA_recombination                                           |   |         |            |   |          |  |     |
| _01        | 15                                                          | 1 | 1       | 1          | 0 | 7.4e-05  |  | GO: |
| 0006325    | Chromatin_organization                                      |   |         |            |   |          |  |     |
| _01        | 25                                                          | 1 | 1       | 1          | 0 | 5e-05    |  | GO: |
| 0006333    | Chromatin_assembly_or_disassembly                           |   |         |            |   |          |  |     |
| _01        | 36                                                          | 0 | 1       | 1          | 0 | 0        |  | GO: |
| 0006334    | Nucleosome_assembly                                         |   |         |            |   |          |  |     |
| _01        | 32                                                          | 1 | 1       | 1          | 0 | 6.3e-05  |  | GO: |
| 0006338    | Chromatin_remodeling                                        |   |         |            |   |          |  |     |
| _01        | 5                                                           | 0 | 1       | 1          | 0 | 0        |  | GO: |
| 0006342    | Chromatin_silencing                                         |   |         |            |   |          |  |     |
| _01        | 6                                                           | 0 | 1       | 1          | 0 | 0        |  | GO: |
| 0006349    | Regulation_of_gene_expression_by_genetic_imprinting         |   |         |            |   |          |  |     |
| _01        | 122                                                         | 0 | 1       | 1          | 0 | 0        |  | GO: |
| 0006350    | Transcription                                               |   |         |            |   |          |  |     |
| _01        | 13                                                          | 0 | 1       | 1          | 0 | 0        |  | GO: |
| 0006351    | Transcription,_DNA-dependent                                |   |         |            |   |          |  |     |
| _01        | 8                                                           | 0 | 1       | 1          | 0 | 0        |  | GO: |
| 0006352    | Transcription_initiation,_DNA-dependent                     |   |         |            |   |          |  |     |
| _01        | 6                                                           | 0 | 1       | 1          | 0 | 0        |  | GO: |
| 0006354    | Transcription_elongation,_DNA-dependent                     |   |         |            |   |          |  |     |
| _01        | 557                                                         | 5 | 1.6e-05 | 0.00879199 | 0 | 0.000246 |  |     |
| GO:0006355 | Regulation_of_transcription,_DNA-dependent                  |   |         |            |   |          |  |     |
| _01        | 152                                                         | 0 | 1       | 1          | 0 | 0        |  | GO: |
| 0006357    | Regulation_of_transcription_from_RNA_polymerase_II_promoter |   |         |            |   |          |  |     |
| _01        | 16                                                          | 0 | 1       | 1          | 0 | 0        |  | GO: |
| 0006360    | Transcription_from_RNA_polymerase_I_promoter                |   |         |            |   |          |  |     |
| _01        | 16                                                          | 0 | 1       | 1          | 0 | 0        |  | GO: |
| 0006361    | Transcription_initiation_from_RNA_polymerase_I_promoter     |   |         |            |   |          |  |     |
| _01        | 11                                                          | 0 | 1       | 1          | 0 | 0        |  | GO: |
| 0006362    | Transcription_elongation_from_RNA_polymerase_I_promoter     |   |         |            |   |          |  |     |
| _01        | 13                                                          | 0 | 1       | 1          | 0 | 0        |  | GO: |

|         |                                                           |   |   |   |   |   |  |     |
|---------|-----------------------------------------------------------|---|---|---|---|---|--|-----|
| 0006363 | Termination_of_RNA_polymerase_I_transcription             |   |   |   |   |   |  |     |
| _01     | 58                                                        | 0 | 1 | 1 | 0 | 0 |  | GO: |
| 0006364 | RRNA_processing                                           |   |   |   |   |   |  |     |
| _01     | 161                                                       | 0 | 1 | 1 | 0 | 0 |  | GO: |
| 0006366 | Transcription_from_RNA_polymerase_II_promoter             |   |   |   |   |   |  |     |
| _01     | 38                                                        | 0 | 1 | 1 | 0 | 0 |  | GO: |
| 0006367 | Transcription_initiation_from_RNA_polymerase_II_promoter  |   |   |   |   |   |  |     |
| _01     | 31                                                        | 0 | 1 | 1 | 0 | 0 |  | GO: |
| 0006368 | Transcription_elongation_from_RNA_polymerase_II_promoter  |   |   |   |   |   |  |     |
| _01     | 35                                                        | 0 | 1 | 1 | 0 | 0 |  | GO: |
| 0006369 | Termination_of_RNA_polymerase_II_transcription            |   |   |   |   |   |  |     |
| _01     | 17                                                        | 0 | 1 | 1 | 0 | 0 |  | GO: |
| 0006370 | MRNA_capping                                              |   |   |   |   |   |  |     |
| _01     | 7                                                         | 0 | 1 | 1 | 0 | 0 |  | GO: |
| 0006376 | MRNA_splice_site_selection                                |   |   |   |   |   |  |     |
| _01     | 7                                                         | 0 | 1 | 1 | 0 | 0 |  | GO: |
| 0006378 | MRNA_polyadenylation                                      |   |   |   |   |   |  |     |
| _01     | 8                                                         | 0 | 1 | 1 | 0 | 0 |  | GO: |
| 0006379 | MRNA_cleavage                                             |   |   |   |   |   |  |     |
| _01     | 19                                                        | 0 | 1 | 1 | 0 | 0 |  | GO: |
| 0006383 | Transcription_from_RNA_polymerase_III_promoter            |   |   |   |   |   |  |     |
| _01     | 9                                                         | 0 | 1 | 1 | 0 | 0 |  | GO: |
| 0006385 | Transcription_elongation_from_RNA_polymerase_III_promoter |   |   |   |   |   |  |     |
| _01     | 9                                                         | 0 | 1 | 1 | 0 | 0 |  | GO: |
| 0006386 | Termination_of_RNA_polymerase_III_transcription           |   |   |   |   |   |  |     |
| _01     | 57                                                        | 0 | 1 | 1 | 0 | 0 |  | GO: |
| 0006396 | RNA_processing                                            |   |   |   |   |   |  |     |
| _01     | 166                                                       | 0 | 1 | 1 | 0 | 0 |  | GO: |
| 0006397 | MRNA_processing                                           |   |   |   |   |   |  |     |
| _01     | 5                                                         | 0 | 1 | 1 | 0 | 0 |  | GO: |
| 0006398 | Histone_mRNA_3'-end_processing                            |   |   |   |   |   |  |     |
| _01     | 9                                                         | 0 | 1 | 1 | 0 | 0 |  | GO: |
| 0006401 | RNA_catabolic_process                                     |   |   |   |   |   |  |     |
| _01     | 7                                                         | 0 | 1 | 1 | 0 | 0 |  | GO: |
| 0006402 | MRNA_catabolic_process                                    |   |   |   |   |   |  |     |
| _01     | 40                                                        | 0 | 1 | 1 | 0 | 0 |  | GO: |
| 0006406 | MRNA_export_from_nucleus                                  |   |   |   |   |   |  |     |
| _01     | 171                                                       | 0 | 1 | 1 | 0 | 0 |  | GO: |
| 0006412 | Translation                                               |   |   |   |   |   |  |     |
| _01     | 15                                                        | 0 | 1 | 1 | 0 | 0 |  | GO: |
| 0006413 | Translational_initiation                                  |   |   |   |   |   |  |     |
| _01     | 66                                                        | 0 | 1 | 1 | 0 | 0 |  | GO: |
| 0006414 | Translational_elongation                                  |   |   |   |   |   |  |     |
| _01     | 61                                                        | 0 | 1 | 1 | 0 | 0 |  | GO: |
| 0006415 | Translational_termination                                 |   |   |   |   |   |  |     |
| _01     | 43                                                        | 0 | 1 | 1 | 0 | 0 |  | GO: |
| 0006417 | Regulation_of_translation                                 |   |   |   |   |   |  |     |
| _01     | 21                                                        | 0 | 1 | 1 | 0 | 0 |  | GO: |
| 0006418 | TRNA_aminoacylation_for_protein_translation               |   |   |   |   |   |  |     |
| _01     | 16                                                        | 0 | 1 | 1 | 0 | 0 |  | GO: |
| 0006446 | Regulation_of_translational_initiation                    |   |   |   |   |   |  |     |
| _01     | 110                                                       | 0 | 1 | 1 | 0 | 0 |  | GO: |
| 0006457 | Protein_folding                                           |   |   |   |   |   |  |     |
| _01     | 68                                                        | 0 | 1 | 1 | 0 | 0 |  | GO: |

|         |                                                      |   |          |          |   |          |     |  |
|---------|------------------------------------------------------|---|----------|----------|---|----------|-----|--|
| 0006461 | Protein_complex_assembly                             |   |          |          |   |          |     |  |
| _01     | 94                                                   | 0 | 1        | 1        | 0 | 0        | G0: |  |
| 0006464 | Protein_modification_process                         |   |          |          |   |          |     |  |
| _01     | 7                                                    | 0 | 1        | 1        | 0 | 0        | G0: |  |
| 0006465 | Signal_peptide_processing                            |   |          |          |   |          |     |  |
| _01     | 5                                                    | 0 | 1        | 1        | 0 | 0        | G0: |  |
| 0006467 | Protein_thiol-disulfide_exchange                     |   |          |          |   |          |     |  |
| _01     | 300                                                  | 0 | 1        | 1        | 0 | 0        | G0: |  |
| 0006468 | Protein_phosphorylation                              |   |          |          |   |          |     |  |
| _01     | 36                                                   | 0 | 1        | 1        | 0 | 0        | G0: |  |
| 0006469 | Negative_regulation_of_protein_kinase_activity       |   |          |          |   |          |     |  |
| _01     | 75                                                   | 0 | 1        | 1        | 0 | 0        | G0: |  |
| 0006470 | Protein_dephosphorylation                            |   |          |          |   |          |     |  |
| _01     | 12                                                   | 0 | 1        | 1        | 0 | 0        | G0: |  |
| 0006471 | Protein_ADP-ribosylation                             |   |          |          |   |          |     |  |
| _01     | 5                                                    | 0 | 1        | 1        | 0 | 0        | G0: |  |
| 0006476 | Protein_deacetylation                                |   |          |          |   |          |     |  |
| _01     | 6                                                    | 0 | 1        | 1        | 0 | 0        | G0: |  |
| 0006479 | Protein_methylation                                  |   |          |          |   |          |     |  |
| _01     | 41                                                   | 1 | 1        | 1        | 0 | 0.000423 | G0: |  |
| 0006486 | Protein_glycosylation                                |   |          |          |   |          |     |  |
| _01     | 12                                                   | 0 | 1        | 1        | 0 | 0        | G0: |  |
| 0006487 | Protein_N-linked_glycosylation                       |   |          |          |   |          |     |  |
| _01     | 21                                                   | 0 | 1        | 1        | 0 | 0        | G0: |  |
| 0006488 | Dolichol-linked_oligosaccharide_biosynthetic_process |   |          |          |   |          |     |  |
| _01     | 8                                                    | 0 | 1        | 1        | 0 | 0        | G0: |  |
| 0006491 | N-glycan_processing                                  |   |          |          |   |          |     |  |
| _01     | 12                                                   | 0 | 1        | 1        | 0 | 0        | G0: |  |
| 0006493 | Protein_O-linked_glycosylation                       |   |          |          |   |          |     |  |
| _01     | 16                                                   | 0 | 1        | 1        | 0 | 0        | G0: |  |
| 0006501 | C-terminal_protein_lipidation                        |   |          |          |   |          |     |  |
| _01     | 14                                                   | 0 | 1        | 1        | 0 | 0        | G0: |  |
| 0006506 | GPI_anchor_biosynthetic_process                      |   |          |          |   |          |     |  |
| _01     | 268                                                  | 2 | 0.016238 | 0.541168 | 0 | 7.35e-05 | G0: |  |
| 0006508 | Proteolysis                                          |   |          |          |   |          |     |  |
| _01     | 9                                                    | 0 | 1        | 1        | 0 | 0        | G0: |  |
| 0006509 | Membrane_protein_ectodomain_proteolysis              |   |          |          |   |          |     |  |
| _01     | 79                                                   | 1 | 1        | 1        | 0 | 0.000423 | G0: |  |
| 0006511 | Ubiquitin-dependent_protein_catabolic_process        |   |          |          |   |          |     |  |
| _01     | 30                                                   | 0 | 1        | 1        | 0 | 0        | G0: |  |
| 0006520 | Cellular_amino_acid_metabolic_process                |   |          |          |   |          |     |  |
| _01     | 33                                                   | 0 | 1        | 1        | 0 | 0        | G0: |  |
| 0006521 | Regulation_of_cellular_amino_acid_metabolic_process  |   |          |          |   |          |     |  |
| _01     | 7                                                    | 0 | 1        | 1        | 0 | 0        | G0: |  |
| 0006527 | Arginine_catabolic_process                           |   |          |          |   |          |     |  |
| _01     | 5                                                    | 0 | 1        | 1        | 0 | 0        | G0: |  |
| 0006536 | Glutamate_metabolic_process                          |   |          |          |   |          |     |  |
| _01     | 10                                                   | 0 | 1        | 1        | 0 | 0        | G0: |  |
| 0006541 | Glutamine_metabolic_process                          |   |          |          |   |          |     |  |
| _01     | 5                                                    | 0 | 1        | 1        | 0 | 0        | G0: |  |
| 0006546 | Glycine_catabolic_process                            |   |          |          |   |          |     |  |
| _01     | 8                                                    | 0 | 1        | 1        | 0 | 0        | G0: |  |
| 0006548 | Histidine_catabolic_process                          |   |          |          |   |          |     |  |
| _01     | 7                                                    | 0 | 1        | 1        | 0 | 0        | G0: |  |

|         |                                                             |   |   |   |   |         |     |  |
|---------|-------------------------------------------------------------|---|---|---|---|---------|-----|--|
| 0006554 | Lysine_catabolic_process                                    |   |   |   |   |         |     |  |
| _01     | 6                                                           | 0 | 1 | 1 | 0 | 0       | G0: |  |
| 0006559 | L-phenylalanine_catabolic_process                           |   |   |   |   |         |     |  |
| _01     | 5                                                           | 0 | 1 | 1 | 0 | 0       | G0: |  |
| 0006569 | Tryptophan_catabolic_process                                |   |   |   |   |         |     |  |
| _01     | 5                                                           | 0 | 1 | 1 | 0 | 0       | G0: |  |
| 0006573 | Valine_metabolic_process                                    |   |   |   |   |         |     |  |
| _01     | 5                                                           | 0 | 1 | 1 | 0 | 0       | G0: |  |
| 0006584 | Catecholamine_metabolic_process                             |   |   |   |   |         |     |  |
| _01     | 6                                                           | 0 | 1 | 1 | 0 | 0       | G0: |  |
| 0006590 | Thyroid_hormone_generation                                  |   |   |   |   |         |     |  |
| _01     | 5                                                           | 0 | 1 | 1 | 0 | 0       | G0: |  |
| 0006595 | Polyamine_metabolic_process                                 |   |   |   |   |         |     |  |
| _01     | 5                                                           | 0 | 1 | 1 | 0 | 0       | G0: |  |
| 0006600 | Creatine_metabolic_process                                  |   |   |   |   |         |     |  |
| _01     | 20                                                          | 0 | 1 | 1 | 0 | 0       | G0: |  |
| 0006605 | Protein_targeting                                           |   |   |   |   |         |     |  |
| _01     | 16                                                          | 0 | 1 | 1 | 0 | 0       | G0: |  |
| 0006606 | Protein_import_into_nucleus                                 |   |   |   |   |         |     |  |
| _01     | 8                                                           | 0 | 1 | 1 | 0 | 0       | G0: |  |
| 0006607 | NLS-bearing_substrate_import_into_nucleus                   |   |   |   |   |         |     |  |
| _01     | 10                                                          | 0 | 1 | 1 | 0 | 0       | G0: |  |
| 0006611 | Protein_export_from_nucleus                                 |   |   |   |   |         |     |  |
| _01     | 7                                                           | 1 | 1 | 1 | 0 | 5e-05   | G0: |  |
| 0006612 | Protein_targeting_to_membrane                               |   |   |   |   |         |     |  |
| _01     | 5                                                           | 0 | 1 | 1 | 0 | 0       | G0: |  |
| 0006613 | Cotranslational_protein_targeting_to_membrane               |   |   |   |   |         |     |  |
| _01     | 5                                                           | 0 | 1 | 1 | 0 | 0       | G0: |  |
| 0006614 | SRP-dependent_cotranslational_protein_targeting_to_membrane |   |   |   |   |         |     |  |
| _01     | 6                                                           | 0 | 1 | 1 | 0 | 0       | G0: |  |
| 0006621 | Protein_retention_in_ER_lumen                               |   |   |   |   |         |     |  |
| _01     | 5                                                           | 0 | 1 | 1 | 0 | 0       | G0: |  |
| 0006622 | Protein_targeting_to_lysosome                               |   |   |   |   |         |     |  |
| _01     | 6                                                           | 0 | 1 | 1 | 0 | 0       | G0: |  |
| 0006625 | Protein_targeting_to_peroxisome                             |   |   |   |   |         |     |  |
| _01     | 17                                                          | 0 | 1 | 1 | 0 | 0       | G0: |  |
| 0006626 | Protein_targeting_to_mitochondrion                          |   |   |   |   |         |     |  |
| _01     | 133                                                         | 0 | 1 | 1 | 0 | 0       | G0: |  |
| 0006629 | Lipid_metabolic_process                                     |   |   |   |   |         |     |  |
| _01     | 43                                                          | 0 | 1 | 1 | 0 | 0       | G0: |  |
| 0006631 | Fatty_acid_metabolic_process                                |   |   |   |   |         |     |  |
| _01     | 35                                                          | 1 | 1 | 1 | 0 | 3.9e-05 | G0: |  |
| 0006633 | Fatty_acid_biosynthetic_process                             |   |   |   |   |         |     |  |
| _01     | 11                                                          | 0 | 1 | 1 | 0 | 0       | G0: |  |
| 0006635 | Fatty_acid_beta-oxidation                                   |   |   |   |   |         |     |  |
| _01     | 9                                                           | 0 | 1 | 1 | 0 | 0       | G0: |  |
| 0006637 | Acyl-CoA_metabolic_process                                  |   |   |   |   |         |     |  |
| _01     | 15                                                          | 0 | 1 | 1 | 0 | 0       | G0: |  |
| 0006641 | Triglyceride_metabolic_process                              |   |   |   |   |         |     |  |
| _01     | 5                                                           | 0 | 1 | 1 | 0 | 0       | G0: |  |
| 0006642 | Triglyceride_mobilization                                   |   |   |   |   |         |     |  |
| _01     | 19                                                          | 0 | 1 | 1 | 0 | 0       | G0: |  |
| 0006644 | Phospholipid_metabolic_process                              |   |   |   |   |         |     |  |
| _01     | 8                                                           | 0 | 1 | 1 | 0 | 0       | G0: |  |

|         |                                          |   |   |   |   |         |     |  |
|---------|------------------------------------------|---|---|---|---|---------|-----|--|
| 0006656 | Phosphatidylcholine_biosynthetic_process |   |   |   |   |         |     |  |
| _01     | 25                                       | 0 | 1 | 1 | 0 | 0       | G0: |  |
| 0006665 | Sphingolipid_metabolic_process           |   |   |   |   |         |     |  |
| _01     | 9                                        | 0 | 1 | 1 | 0 | 0       | G0: |  |
| 0006672 | Ceramide_metabolic_process               |   |   |   |   |         |     |  |
| _01     | 5                                        | 0 | 1 | 1 | 0 | 0       | G0: |  |
| 0006685 | Sphingomyelin_catabolic_process          |   |   |   |   |         |     |  |
| _01     | 6                                        | 0 | 1 | 1 | 0 | 0       | G0: |  |
| 0006688 | Glycosphingolipid_biosynthetic_process   |   |   |   |   |         |     |  |
| _01     | 8                                        | 1 | 1 | 1 | 0 | 3.9e-05 | G0: |  |
| 0006692 | Prostanoid_metabolic_process             |   |   |   |   |         |     |  |
| _01     | 6                                        | 1 | 1 | 1 | 0 | 3.9e-05 | G0: |  |
| 0006693 | Prostaglandin_metabolic_process          |   |   |   |   |         |     |  |
| _01     | 15                                       | 0 | 1 | 1 | 0 | 0       | G0: |  |
| 0006694 | Steroid_biosynthetic_process             |   |   |   |   |         |     |  |
| _01     | 21                                       | 0 | 1 | 1 | 0 | 0       | G0: |  |
| 0006695 | Cholesterol_biosynthetic_process         |   |   |   |   |         |     |  |
| _01     | 11                                       | 0 | 1 | 1 | 0 | 0       | G0: |  |
| 0006699 | Bile_acid_biosynthetic_process           |   |   |   |   |         |     |  |
| _01     | 4                                        | 0 | 1 | 1 | 0 | 0       | G0: |  |
| 0006700 | C21-steroid_hormone_biosynthetic_process |   |   |   |   |         |     |  |
| _01     | 4                                        | 0 | 1 | 1 | 0 | 0       | G0: |  |
| 0006702 | Androgen_biosynthetic_process            |   |   |   |   |         |     |  |
| _01     | 4                                        | 0 | 1 | 1 | 0 | 0       | G0: |  |
| 0006704 | Glucocorticoid_biosynthetic_process      |   |   |   |   |         |     |  |
| _01     | 8                                        | 0 | 1 | 1 | 0 | 0       | G0: |  |
| 0006707 | Cholesterol_catabolic_process            |   |   |   |   |         |     |  |
| _01     | 6                                        | 0 | 1 | 1 | 0 | 0       | G0: |  |
| 0006729 | Tetrahydrobiopterin_biosynthetic_process |   |   |   |   |         |     |  |
| _01     | 13                                       | 0 | 1 | 1 | 0 | 0       | G0: |  |
| 0006730 | One-carbon_metabolic_process             |   |   |   |   |         |     |  |
| _01     | 5                                        | 0 | 1 | 1 | 0 | 0       | G0: |  |
| 0006734 | NADH_metabolic_process                   |   |   |   |   |         |     |  |
| _01     | 6                                        | 0 | 1 | 1 | 0 | 0       | G0: |  |
| 0006744 | Ubiquinone_biosynthetic_process          |   |   |   |   |         |     |  |
| _01     | 13                                       | 0 | 1 | 1 | 0 | 0       | G0: |  |
| 0006749 | Glutathione_metabolic_process            |   |   |   |   |         |     |  |
| _01     | 6                                        | 0 | 1 | 1 | 0 | 0       | G0: |  |
| 0006750 | Glutathione_biosynthetic_process         |   |   |   |   |         |     |  |
| _01     | 34                                       | 1 | 1 | 1 | 0 | 5e-05   | G0: |  |
| 0006754 | ATP_biosynthetic_process                 |   |   |   |   |         |     |  |
| _01     | 32                                       | 0 | 1 | 1 | 0 | 0       | G0: |  |
| 0006766 | Vitamin_metabolic_process                |   |   |   |   |         |     |  |
| _01     | 26                                       | 0 | 1 | 1 | 0 | 0       | G0: |  |
| 0006767 | Water-soluble_vitamin_metabolic_process  |   |   |   |   |         |     |  |
| _01     | 5                                        | 0 | 1 | 1 | 0 | 0       | G0: |  |
| 0006776 | Vitamin_A_metabolic_process              |   |   |   |   |         |     |  |
| _01     | 7                                        | 0 | 1 | 1 | 0 | 0       | G0: |  |
| 0006778 | Porphyrin_metabolic_process              |   |   |   |   |         |     |  |
| _01     | 10                                       | 0 | 1 | 1 | 0 | 0       | G0: |  |
| 0006783 | Heme_biosynthetic_process                |   |   |   |   |         |     |  |
| _01     | 10                                       | 0 | 1 | 1 | 0 | 0       | G0: |  |
| 0006790 | Sulfur_compound_metabolic_process        |   |   |   |   |         |     |  |
| _01     | 10                                       | 0 | 1 | 1 | 0 | 0       | G0: |  |



|            |                                                      |   |           |   |          |          |          |  |
|------------|------------------------------------------------------|---|-----------|---|----------|----------|----------|--|
| 0006796    | Phosphate_metabolic_process                          |   |           |   |          |          |          |  |
| _01        | 18                                                   | 0 | 1         | 1 | 0        | 0        | G0:      |  |
| 0006800    | Oxygen_and_reactive_oxygen_species_metabolic_process |   |           |   |          |          |          |  |
| _01        | 9                                                    | 0 | 1         | 1 | 0        | 0        | G0:      |  |
| 0006801    | Superoxide_metabolic_process                         |   |           |   |          |          |          |  |
| _01        | 62                                                   | 1 | 1         | 1 | 0        | 3.9e-05  | G0:      |  |
| 0006805    | Xenobiotic_metabolic_process                         |   |           |   |          |          |          |  |
| _01        | 10                                                   | 0 | 1         | 1 | 0        | 0        | G0:      |  |
| 0006807    | Nitrogen_compound_metabolic_process                  |   |           |   |          |          |          |  |
| _01        | 7                                                    | 0 | 1         | 1 | 0        | 0        | G0:      |  |
| 0006809    | Nitric_oxide_biosynthetic_process                    |   |           |   |          |          |          |  |
| _01        | 324                                                  | 1 | 1         | 1 | 0        | 0.000339 | G0:      |  |
| 0006810    | Transport                                            |   |           |   |          |          |          |  |
| _01        | 391                                                  | 2 | 0.0635899 |   | 0.727532 | 0        | 0.000246 |  |
| G0:0006811 | Ion_transport                                        |   |           |   |          |          |          |  |
| _01        | 26                                                   | 0 | 1         | 1 | 0        | 0        | G0:      |  |
| 0006812    | Cation_transport                                     |   |           |   |          |          |          |  |
| _01        | 108                                                  | 0 | 1         | 1 | 0        | 0        | G0:      |  |
| 0006813    | Potassium_ion_transport                              |   |           |   |          |          |          |  |
| _01        | 77                                                   | 0 | 1         | 1 | 0        | 0        | G0:      |  |
| 0006814    | Sodium_ion_transport                                 |   |           |   |          |          |          |  |
| _01        | 84                                                   | 0 | 1         | 1 | 0        | 0        | G0:      |  |
| 0006816    | Calcium_ion_transport                                |   |           |   |          |          |          |  |
| _01        | 7                                                    | 0 | 1         | 1 | 0        | 0        | G0:      |  |
| 0006817    | Phosphate_transport                                  |   |           |   |          |          |          |  |
| _01        | 9                                                    | 0 | 1         | 1 | 0        | 0        | G0:      |  |
| 0006820    | Anion_transport                                      |   |           |   |          |          |          |  |
| _01        | 12                                                   | 0 | 1         | 1 | 0        | 0        | G0:      |  |
| 0006821    | Chloride_transport                                   |   |           |   |          |          |          |  |
| _01        | 8                                                    | 0 | 1         | 1 | 0        | 0        | G0:      |  |
| 0006825    | Copper_ion_transport                                 |   |           |   |          |          |          |  |
| _01        | 15                                                   | 0 | 1         | 1 | 0        | 0        | G0:      |  |
| 0006826    | Iron_ion_transport                                   |   |           |   |          |          |          |  |
| _01        | 16                                                   | 0 | 1         | 1 | 0        | 0        | G0:      |  |
| 0006829    | Zinc_ion_transport                                   |   |           |   |          |          |          |  |
| _01        | 23                                                   | 0 | 1         | 1 | 0        | 0        | G0:      |  |
| 0006833    | Water_transport                                      |   |           |   |          |          |          |  |
| _01        | 7                                                    | 0 | 1         | 1 | 0        | 0        | G0:      |  |
| 0006835    | Dicarboxylic_acid_transport                          |   |           |   |          |          |          |  |
| _01        | 22                                                   | 0 | 1         | 1 | 0        | 0        | G0:      |  |
| 0006836    | Neurotransmitter_transport                           |   |           |   |          |          |          |  |
| _01        | 7                                                    | 0 | 1         | 1 | 0        | 0        | G0:      |  |
| 0006839    | Mitochondrial_transport                              |   |           |   |          |          |          |  |
| _01        | 6                                                    | 0 | 1         | 1 | 0        | 0        | G0:      |  |
| 0006853    | Carnitine_shuttle                                    |   |           |   |          |          |          |  |
| _01        | 29                                                   | 0 | 1         | 1 | 0        | 0        | G0:      |  |
| 0006865    | Amino_acid_transport                                 |   |           |   |          |          |          |  |
| _01        | 36                                                   | 0 | 1         | 1 | 0        | 0        | G0:      |  |
| 0006869    | Lipid_transport                                      |   |           |   |          |          |          |  |
| _01        | 5                                                    | 0 | 1         | 1 | 0        | 0        | G0:      |  |
| 0006873    | Cellular_ion_homeostasis                             |   |           |   |          |          |          |  |
| _01        | 47                                                   | 0 | 1         | 1 | 0        | 0        | G0:      |  |
| 0006874    | Cellular_calcium_ion_homeostasis                     |   |           |   |          |          |          |  |
| _01        | 7                                                    | 0 | 1         | 1 | 0        | 0        | G0:      |  |

|            |                                                      |   |          |          |   |             |     |  |
|------------|------------------------------------------------------|---|----------|----------|---|-------------|-----|--|
| 0006878    | Cellular_copper_ion_homeostasis                      |   |          |          |   |             |     |  |
| _01        | 14                                                   | 0 | 1        | 1        | 0 | 0           | G0: |  |
| 0006879    | Cellular_iron_ion_homeostasis                        |   |          |          |   |             |     |  |
| _01        | 5                                                    | 0 | 1        | 1        | 0 | 0           | G0: |  |
| 0006882    | Cellular_zinc_ion_homeostasis                        |   |          |          |   |             |     |  |
| _01        | 8                                                    | 0 | 1        | 1        | 0 | 0           | G0: |  |
| 0006884    | Cell_volume_homeostasis                              |   |          |          |   |             |     |  |
| _01        | 12                                                   | 0 | 1        | 1        | 0 | 0           | G0: |  |
| 0006885    | Regulation_of_pH                                     |   |          |          |   |             |     |  |
| _01        | 122                                                  | 0 | 1        | 1        | 0 | 0           | G0: |  |
| 0006886    | Intracellular_protein_transport                      |   |          |          |   |             |     |  |
| _01        | 33                                                   | 0 | 1        | 1        | 0 | 0           | G0: |  |
| 0006887    | Exocytosis                                           |   |          |          |   |             |     |  |
| _01        | 31                                                   | 0 | 1        | 1        | 0 | 0           | G0: |  |
| 0006888    | ER_to_Golgi_vesicle-mediated_transport               |   |          |          |   |             |     |  |
| _01        | 13                                                   | 0 | 1        | 1        | 0 | 0           | G0: |  |
| 0006890    | Retrograde_vesicle-mediated_transport,_Golgi_to_ER   |   |          |          |   |             |     |  |
| _01        | 11                                                   | 0 | 1        | 1        | 0 | 0           | G0: |  |
| 0006891    | Intra-Golgi_vesicle-mediated_transport               |   |          |          |   |             |     |  |
| _01        | 28                                                   | 0 | 1        | 1        | 0 | 0           | G0: |  |
| 0006892    | Post-Golgi_vesicle-mediated_transport                |   |          |          |   |             |     |  |
| _01        | 5                                                    | 0 | 1        | 1        | 0 | 0           | G0: |  |
| 0006895    | Golgi_to_endosome_transport                          |   |          |          |   |             |     |  |
| _01        | 68                                                   | 0 | 1        | 1        | 0 | 0           | G0: |  |
| 0006897    | Endocytosis                                          |   |          |          |   |             |     |  |
| _01        | 32                                                   | 0 | 1        | 1        | 0 | 0           | G0: |  |
| 0006898    | Receptor-mediated_endocytosis                        |   |          |          |   |             |     |  |
| _01        | 14                                                   | 0 | 1        | 1        | 0 | 0           | G0: |  |
| 0006904    | Vesicle_docking_involved_in_exocytosis               |   |          |          |   |             |     |  |
| _01        | 5                                                    | 0 | 1        | 1        | 0 | 0           | G0: |  |
| 0006906    | Vesicle_fusion                                       |   |          |          |   |             |     |  |
| _01        | 21                                                   | 0 | 1        | 1        | 0 | 0           | G0: |  |
| 0006909    | Phagocytosis                                         |   |          |          |   |             |     |  |
| _01        | 11                                                   | 0 | 1        | 1        | 0 | 0           | G0: |  |
| 0006913    | Nucleocytoplasmic_transport                          |   |          |          |   |             |     |  |
| _01        | 25                                                   | 0 | 1        | 1        | 0 | 0           | G0: |  |
| 0006914    | Autophagy                                            |   |          |          |   |             |     |  |
| _01        | 364                                                  | 3 | 0.002442 | 0.264807 | 0 | 0.000182333 |     |  |
| G0:0006915 | Apoptosis                                            |   |          |          |   |             |     |  |
| _01        | 128                                                  | 0 | 1        | 1        | 0 | 0           | G0: |  |
| 0006916    | Anti-apoptosis                                       |   |          |          |   |             |     |  |
| _01        | 115                                                  | 1 | 1        | 1        | 0 | 0.000423    | G0: |  |
| 0006917    | Induction_of_apoptosis                               |   |          |          |   |             |     |  |
| _01        | 31                                                   | 1 | 1        | 1        | 0 | 0.000423    | G0: |  |
| 0006919    | Activation_of_caspase_activity                       |   |          |          |   |             |     |  |
| _01        | 30                                                   | 1 | 1        | 1        | 0 | 7.4e-05     | G0: |  |
| 0006921    | Cellular_component_disassembly_involved_in_apoptosis |   |          |          |   |             |     |  |
| _01        | 71                                                   | 1 | 1        | 1        | 0 | 3.9e-05     | G0: |  |
| 0006928    | Cellular_component_movement                          |   |          |          |   |             |     |  |
| _01        | 80                                                   | 0 | 1        | 1        | 0 | 0           | G0: |  |
| 0006935    | Chemotaxis                                           |   |          |          |   |             |     |  |
| _01        | 67                                                   | 0 | 1        | 1        | 0 | 0           | G0: |  |
| 0006936    | Muscle_contraction                                   |   |          |          |   |             |     |  |
| _01        | 10                                                   | 0 | 1        | 1        | 0 | 0           | G0: |  |

|         |                                                                                                                 |   |   |   |   |          |     |  |
|---------|-----------------------------------------------------------------------------------------------------------------|---|---|---|---|----------|-----|--|
| 0006937 | Regulation_of_muscle_contraction                                                                                |   |   |   |   |          |     |  |
| _01     | 10                                                                                                              | 0 | 1 | 1 | 0 | 0        | G0: |  |
| 0006939 | Smooth_muscle_contraction                                                                                       |   |   |   |   |          |     |  |
| _01     | 8                                                                                                               | 0 | 1 | 1 | 0 | 0        | G0: |  |
| 0006940 | Regulation_of_smooth_muscle_contraction                                                                         |   |   |   |   |          |     |  |
| _01     | 7                                                                                                               | 1 | 1 | 1 | 0 | 5e-05    | G0: |  |
| 0006941 | Striated_muscle_contraction                                                                                     |   |   |   |   |          |     |  |
| _01     | 8                                                                                                               | 0 | 1 | 1 | 0 | 0        | G0: |  |
| 0006942 | Regulation_of_striated_muscle_contraction                                                                       |   |   |   |   |          |     |  |
| _01     | 15                                                                                                              | 0 | 1 | 1 | 0 | 0        | G0: |  |
| 0006944 | Cellular_membrane_fusion                                                                                        |   |   |   |   |          |     |  |
| _01     | 78                                                                                                              | 1 | 1 | 1 | 0 | 5e-05    | G0: |  |
| 0006950 | Response_to_stress                                                                                              |   |   |   |   |          |     |  |
| _01     | 43                                                                                                              | 0 | 1 | 1 | 0 | 0        | G0: |  |
| 0006952 | Defense_response                                                                                                |   |   |   |   |          |     |  |
| _01     | 21                                                                                                              | 1 | 1 | 1 | 0 | 0.000339 | G0: |  |
| 0006953 | Acute-phase_response                                                                                            |   |   |   |   |          |     |  |
| _01     | 151                                                                                                             | 1 | 1 | 1 | 0 | 0.000339 | G0: |  |
| 0006954 | Inflammatory_response                                                                                           |   |   |   |   |          |     |  |
| _01     | 207                                                                                                             | 0 | 1 | 1 | 0 | 0        | G0: |  |
| 0006955 | Immune_response                                                                                                 |   |   |   |   |          |     |  |
| _01     | 13                                                                                                              | 0 | 1 | 1 | 0 | 0        | G0: |  |
| 0006956 | Complement_activation                                                                                           |   |   |   |   |          |     |  |
| _01     | 7                                                                                                               | 0 | 1 | 1 | 0 | 0        | G0: |  |
| 0006957 | Complement_activation,_alternative_pathway                                                                      |   |   |   |   |          |     |  |
| _01     | 20                                                                                                              | 0 | 1 | 1 | 0 | 0        | G0: |  |
| 0006958 | Complement_activation,_classical_pathway                                                                        |   |   |   |   |          |     |  |
| _01     | 22                                                                                                              | 0 | 1 | 1 | 0 | 0        | G0: |  |
| 0006959 | Humoral_immune_response                                                                                         |   |   |   |   |          |     |  |
| _01     | 37                                                                                                              | 0 | 1 | 1 | 0 | 0        | G0: |  |
| 0006968 | Cellular_defense_response                                                                                       |   |   |   |   |          |     |  |
| _01     | 9                                                                                                               | 0 | 1 | 1 | 0 | 0        | G0: |  |
| 0006970 | Response_to_osmotic_stress                                                                                      |   |   |   |   |          |     |  |
| _01     | 58                                                                                                              | 0 | 1 | 1 | 0 | 0        | G0: |  |
| 0006974 | Response_to_DNA_damage_stimulus                                                                                 |   |   |   |   |          |     |  |
| _01     | 39                                                                                                              | 0 | 1 | 1 | 0 | 0        | G0: |  |
| 0006977 | DNA_damage_response,_signal_transduction_by_p53_class_mediator_resulting_in_cell_cycle_arrest                   |   |   |   |   |          |     |  |
| _01     | 6                                                                                                               | 0 | 1 | 1 | 0 | 0        | G0: |  |
| 0006978 | DNA_damage_response,_signal_transduction_by_p53_class_mediator_resulting_in_transcription_of_p21_class_mediator |   |   |   |   |          |     |  |
| _01     | 68                                                                                                              | 1 | 1 | 1 | 0 | 3.9e-05  | G0: |  |
| 0006979 | Response_to_oxidative_stress                                                                                    |   |   |   |   |          |     |  |
| _01     | 5                                                                                                               | 0 | 1 | 1 | 0 | 0        | G0: |  |
| 0006983 | ER_overload_response                                                                                            |   |   |   |   |          |     |  |
| _01     | 36                                                                                                              | 0 | 1 | 1 | 0 | 0        | G0: |  |
| 0006986 | Response_to_unfolded_protein                                                                                    |   |   |   |   |          |     |  |
| _01     | 7                                                                                                               | 0 | 1 | 1 | 0 | 0        | G0: |  |
| 0007004 | Telomere_maintenance_via_telomerase                                                                             |   |   |   |   |          |     |  |
| _01     | 17                                                                                                              | 0 | 1 | 1 | 0 | 0        | G0: |  |
| 0007005 | Mitochondrion_organization                                                                                      |   |   |   |   |          |     |  |
| _01     | 31                                                                                                              | 0 | 1 | 1 | 0 | 0        | G0: |  |

|           |                                                      |                             |             |          |   |          |     |
|-----------|------------------------------------------------------|-----------------------------|-------------|----------|---|----------|-----|
| 0007010   | Cytoskeleton_organization                            |                             |             |          |   |          |     |
| _01       | 19                                                   | 2                           | 8.39999e-05 | 0.034121 | 0 |          |     |
| 0.0002365 | G0:0007015                                           | Actin_filament_organization |             |          |   |          |     |
| _01       | 6                                                    | 0                           | 1           | 1        | 0 | 0        | G0: |
| 0007016   | Cytoskeletal_anchoring_at_plasma_membrane            |                             |             |          |   |          |     |
| _01       | 10                                                   | 0                           | 1           | 1        | 0 | 0        | G0: |
| 0007017   | Microtubule-based_process                            |                             |             |          |   |          |     |
| _01       | 53                                                   | 0                           | 1           | 1        | 0 | 0        | G0: |
| 0007018   | Microtubule-based_movement                           |                             |             |          |   |          |     |
| _01       | 5                                                    | 0                           | 1           | 1        | 0 | 0        | G0: |
| 0007020   | Microtubule_nucleation                               |                             |             |          |   |          |     |
| _01       | 7                                                    | 0                           | 1           | 1        | 0 | 0        | G0: |
| 0007026   | Negative_regulation_of_microtubule_depolymerization  |                             |             |          |   |          |     |
| _01       | 6                                                    | 0                           | 1           | 1        | 0 | 0        | G0: |
| 0007029   | Endoplasmic_reticulum_organization                   |                             |             |          |   |          |     |
| _01       | 13                                                   | 0                           | 1           | 1        | 0 | 0        | G0: |
| 0007030   | Golgi_organization                                   |                             |             |          |   |          |     |
| _01       | 11                                                   | 0                           | 1           | 1        | 0 | 0        | G0: |
| 0007031   | Peroxisome_organization                              |                             |             |          |   |          |     |
| _01       | 12                                                   | 0                           | 1           | 1        | 0 | 0        | G0: |
| 0007032   | Endosome_organization                                |                             |             |          |   |          |     |
| _01       | 17                                                   | 0                           | 1           | 1        | 0 | 0        | G0: |
| 0007040   | Lysosome_organization                                |                             |             |          |   |          |     |
| _01       | 8                                                    | 0                           | 1           | 1        | 0 | 0        | G0: |
| 0007043   | Cell-cell_junction_assembly                          |                             |             |          |   |          |     |
| _01       | 230                                                  | 0                           | 1           | 1        | 0 | 0        | G0: |
| 0007049   | Cell_cycle                                           |                             |             |          |   |          |     |
| _01       | 86                                                   | 0                           | 1           | 1        | 0 | 0        | G0: |
| 0007050   | Cell_cycle_arrest                                    |                             |             |          |   |          |     |
| _01       | 10                                                   | 0                           | 1           | 1        | 0 | 0        | G0: |
| 0007051   | Spindle_organization                                 |                             |             |          |   |          |     |
| _01       | 9                                                    | 0                           | 1           | 1        | 0 | 0        | G0: |
| 0007052   | Mitotic_spindle_organization                         |                             |             |          |   |          |     |
| _01       | 25                                                   | 0                           | 1           | 1        | 0 | 0        | G0: |
| 0007059   | Chromosome_segregation                               |                             |             |          |   |          |     |
| _01       | 106                                                  | 0                           | 1           | 1        | 0 | 0        | G0: |
| 0007067   | Mitosis                                              |                             |             |          |   |          |     |
| _01       | 6                                                    | 0                           | 1           | 1        | 0 | 0        | G0: |
| 0007076   | Mitotic_chromosome_condensation                      |                             |             |          |   |          |     |
| _01       | 7                                                    | 0                           | 1           | 1        | 0 | 0        | G0: |
| 0007080   | Mitotic_metaphase_plate_congression                  |                             |             |          |   |          |     |
| _01       | 10                                                   | 0                           | 1           | 1        | 0 | 0        | G0: |
| 0007088   | Regulation_of_mitosis                                |                             |             |          |   |          |     |
| _01       | 5                                                    | 0                           | 1           | 1        | 0 | 0        | G0: |
| 0007089   | Traversing_start_control_point_of_mitotic_cell_cycle |                             |             |          |   |          |     |
| _01       | 6                                                    | 0                           | 1           | 1        | 0 | 0        | G0: |
| 0007090   | Regulation_of_S_phase_of_mitotic_cell_cycle          |                             |             |          |   |          |     |
| _01       | 6                                                    | 0                           | 1           | 1        | 0 | 0        | G0: |
| 0007091   | Mitotic_metaphase/anaphase_transition                |                             |             |          |   |          |     |
| _01       | 20                                                   | 1                           | 1           | 1        | 0 | 0.000423 | G0: |
| 0007094   | Mitotic_cell_cycle_spindle_assembly_checkpoint       |                             |             |          |   |          |     |
| _01       | 5                                                    | 0                           | 1           | 1        | 0 | 0        | G0: |
| 0007099   | Centriole_replication                                |                             |             |          |   |          |     |
| _01       | 29                                                   | 0                           | 1           | 1        | 0 | 0        | G0: |

|         |                                                                       |   |   |   |   |         |     |  |
|---------|-----------------------------------------------------------------------|---|---|---|---|---------|-----|--|
| 0007126 | Meiosis                                                               |   |   |   |   |         |     |  |
| _01     | 5                                                                     | 0 | 1 | 1 | 0 | 0       | G0: |  |
| 0007130 | Synaptonemal_complex_assembly                                         |   |   |   |   |         |     |  |
| _01     | 14                                                                    | 0 | 1 | 1 | 0 | 0       | G0: |  |
| 0007131 | Reciprocal_meiotic_recombination                                      |   |   |   |   |         |     |  |
| _01     | 9                                                                     | 0 | 1 | 1 | 0 | 0       | G0: |  |
| 0007140 | Male_meiosis                                                          |   |   |   |   |         |     |  |
| _01     | 5                                                                     | 0 | 1 | 1 | 0 | 0       | G0: |  |
| 0007141 | Male_meiosis_I                                                        |   |   |   |   |         |     |  |
| _01     | 63                                                                    | 0 | 1 | 1 | 0 | 0       | G0: |  |
| 0007154 | Cell_communication                                                    |   |   |   |   |         |     |  |
| _01     | 342                                                                   | 0 | 1 | 1 | 0 | 0       | G0: |  |
| 0007155 | Cell_adhesion                                                         |   |   |   |   |         |     |  |
| _01     | 77                                                                    | 0 | 1 | 1 | 0 | 0       | G0: |  |
| 0007156 | Homophilic_cell_adhesion                                              |   |   |   |   |         |     |  |
| _01     | 12                                                                    | 0 | 1 | 1 | 0 | 0       | G0: |  |
| 0007157 | Heterophilic_cell-cell_adhesion                                       |   |   |   |   |         |     |  |
| _01     | 14                                                                    | 0 | 1 | 1 | 0 | 0       | G0: |  |
| 0007159 | Leukocyte_cell-cell_adhesion                                          |   |   |   |   |         |     |  |
| _01     | 54                                                                    | 0 | 1 | 1 | 0 | 0       | G0: |  |
| 0007160 | Cell-matrix_adhesion                                                  |   |   |   |   |         |     |  |
| _01     | 17                                                                    | 0 | 1 | 1 | 0 | 0       | G0: |  |
| 0007162 | Negative_regulation_of_cell_adhesion                                  |   |   |   |   |         |     |  |
| _01     | 15                                                                    | 0 | 1 | 1 | 0 | 0       | G0: |  |
| 0007163 | Establishment_or_maintenance_of_cell_polarity                         |   |   |   |   |         |     |  |
| _01     | 721                                                                   | 1 | 1 | 1 | 0 | 4.9e-05 | G0: |  |
| 0007165 | Signal_transduction                                                   |   |   |   |   |         |     |  |
| _01     | 112                                                                   | 0 | 1 | 1 | 0 | 0       | G0: |  |
| 0007166 | Cell_surface_receptor_linked_signaling_pathway                        |   |   |   |   |         |     |  |
| _01     | 8                                                                     | 0 | 1 | 1 | 0 | 0       | G0: |  |
| 0007168 | Receptor_guanylyl_cyclase_signaling_pathway                           |   |   |   |   |         |     |  |
| _01     | 55                                                                    | 0 | 1 | 1 | 0 | 0       | G0: |  |
| 0007169 | Transmembrane_receptor_protein_tyrosine_kinase_signaling_pathway      |   |   |   |   |         |     |  |
| _01     | 7                                                                     | 0 | 1 | 1 | 0 | 0       | G0: |  |
| 0007172 | Signal_complex_assembly                                               |   |   |   |   |         |     |  |
| _01     | 49                                                                    | 0 | 1 | 1 | 0 | 0       | G0: |  |
| 0007173 | Epidermal_growth_factor_receptor_signaling_pathway                    |   |   |   |   |         |     |  |
| _01     | 44                                                                    | 0 | 1 | 1 | 0 | 0       | G0: |  |
| 0007179 | Transforming_growth_factor_beta_receptor_signaling_pathway            |   |   |   |   |         |     |  |
| _01     | 5                                                                     | 0 | 1 | 1 | 0 | 0       | G0: |  |
| 0007183 | SMAD_protein_complex_assembly                                         |   |   |   |   |         |     |  |
| _01     | 5                                                                     | 0 | 1 | 1 | 0 | 0       | G0: |  |
| 0007185 | Transmembrane_receptor_protein_tyrosine_phosphatase_signaling_pathway |   |   |   |   |         |     |  |
| _01     | 210                                                                   | 0 | 1 | 1 | 0 | 0       | G0: |  |
| 0007186 | G-protein_coupled_receptor_protein_signaling_pathway                  |   |   |   |   |         |     |  |
| _01     | 31                                                                    | 0 | 1 | 1 | 0 | 0       | G0: |  |
| 0007187 | G-protein_signaling,_coupled_to_cyclic_nucleotide_second_messenger    |   |   |   |   |         |     |  |
| _01     | 18                                                                    | 0 | 1 | 1 | 0 | 0       | G0: |  |
| 0007188 | G-protein_signaling,_coupled_to_cAMP_nucleotide_second_messenger      |   |   |   |   |         |     |  |

|         |                                                                                                                                |   |   |   |   |         |     |
|---------|--------------------------------------------------------------------------------------------------------------------------------|---|---|---|---|---------|-----|
| _01     | 27                                                                                                                             | 0 | 1 | 1 | 0 | 0       | G0: |
| 0007189 | Activation_of_adenylate_cyclase_activity_by_G-protein_signaling_pathway                                                        |   |   |   |   |         |     |
| _01     | 20                                                                                                                             | 0 | 1 | 1 | 0 | 0       | G0: |
| 0007190 | Activation_of_adenylate_cyclase_activity                                                                                       |   |   |   |   |         |     |
| _01     | 21                                                                                                                             | 0 | 1 | 1 | 0 | 0       | G0: |
| 0007193 | Inhibition_of_adenylate_cyclase_activity_by_G-protein_signaling_pathway                                                        |   |   |   |   |         |     |
| _01     | 14                                                                                                                             | 0 | 1 | 1 | 0 | 0       | G0: |
| 0007194 | Negative_regulation_of_adenylate_cyclase_activity                                                                              |   |   |   |   |         |     |
| _01     | 24                                                                                                                             | 0 | 1 | 1 | 0 | 0       | G0: |
| 0007200 | Activation_of_phospholipase_C_activity_by_G-protein_coupled_receptor_protein_signaling_pathway_coupled_to_IP3_second_messenger |   |   |   |   |         |     |
| _01     | 39                                                                                                                             | 0 | 1 | 1 | 0 | 0       | G0: |
| 0007202 | Activation_of_phospholipase_C_activity                                                                                         |   |   |   |   |         |     |
| _01     | 70                                                                                                                             | 0 | 1 | 1 | 0 | 0       | G0: |
| 0007204 | Elevation_of_cytosolic_calcium_ion_concentration                                                                               |   |   |   |   |         |     |
| _01     | 27                                                                                                                             | 0 | 1 | 1 | 0 | 0       | G0: |
| 0007205 | Activation_of_protein_kinase_C_activity_by_G-protein_coupled_receptor_protein_signaling_pathway                                |   |   |   |   |         |     |
| _01     | 6                                                                                                                              | 0 | 1 | 1 | 0 | 0       | G0: |
| 0007212 | Dopamine_receptor_signaling_pathway                                                                                            |   |   |   |   |         |     |
| _01     | 6                                                                                                                              | 0 | 1 | 1 | 0 | 0       | G0: |
| 0007213 | Muscarinic_acetylcholine_receptor_signaling_pathway                                                                            |   |   |   |   |         |     |
| _01     | 14                                                                                                                             | 0 | 1 | 1 | 0 | 0       | G0: |
| 0007214 | Gamma-aminobutyric_acid_signaling_pathway                                                                                      |   |   |   |   |         |     |
| _01     | 8                                                                                                                              | 0 | 1 | 1 | 0 | 0       | G0: |
| 0007215 | Glutamate_signaling_pathway                                                                                                    |   |   |   |   |         |     |
| _01     | 6                                                                                                                              | 0 | 1 | 1 | 0 | 0       | G0: |
| 0007217 | Tachykinin_receptor_signaling_pathway                                                                                          |   |   |   |   |         |     |
| _01     | 62                                                                                                                             | 0 | 1 | 1 | 0 | 0       | G0: |
| 0007218 | Neuropeptide_signaling_pathway                                                                                                 |   |   |   |   |         |     |
| _01     | 35                                                                                                                             | 0 | 1 | 1 | 0 | 0       | G0: |
| 0007219 | Notch_signaling_pathway                                                                                                        |   |   |   |   |         |     |
| _01     | 10                                                                                                                             | 0 | 1 | 1 | 0 | 0       | G0: |
| 0007220 | Notch_receptor_processing                                                                                                      |   |   |   |   |         |     |
| _01     | 13                                                                                                                             | 0 | 1 | 1 | 0 | 0       | G0: |
| 0007223 | Wnt_receptor_signaling_pathway,_calcium_modulating_pathway                                                                     |   |   |   |   |         |     |
| _01     | 11                                                                                                                             | 0 | 1 | 1 | 0 | 0       | G0: |
| 0007224 | Smoothed_signaling_pathway                                                                                                     |   |   |   |   |         |     |
| _01     | 34                                                                                                                             | 0 | 1 | 1 | 0 | 0       | G0: |
| 0007229 | Integrin-mediated_signaling_pathway                                                                                            |   |   |   |   |         |     |
| _01     | 69                                                                                                                             | 1 | 1 | 1 | 0 | 5.2e-05 | G0: |
| 0007243 | Intracellular_protein_kinase_cascade                                                                                           |   |   |   |   |         |     |
| _01     | 10                                                                                                                             | 0 | 1 | 1 | 0 | 0       | G0: |
| 0007249 | I-kappaB_kinase/NF-kappaB_cascade                                                                                              |   |   |   |   |         |     |
| _01     | 8                                                                                                                              | 0 | 1 | 1 | 0 | 0       | G0: |
| 0007250 | Activation_of_NF-kappaB-inducing_kinase_activity                                                                               |   |   |   |   |         |     |
| _01     | 6                                                                                                                              | 0 | 1 | 1 | 0 | 0       | G0: |
| 0007252 | I-kappaB_phosphorylation                                                                                                       |   |   |   |   |         |     |
| _01     | 29                                                                                                                             | 0 | 1 | 1 | 0 | 0       | G0: |
| 0007254 | JNK_cascade                                                                                                                    |   |   |   |   |         |     |
| _01     | 18                                                                                                                             | 0 | 1 | 1 | 0 | 0       | G0: |

|            |                                           |   |          |          |   |             |  |     |
|------------|-------------------------------------------|---|----------|----------|---|-------------|--|-----|
| 0007257    | Activation_of_JUN_kinase_activity         |   |          |          |   |             |  |     |
| _01        | 19                                        | 0 | 1        | 1        | 0 | 0           |  | GO: |
| 0007259    | JAK-STAT_cascade                          |   |          |          |   |             |  |     |
| _01        | 9                                         | 0 | 1        | 1        | 0 | 0           |  | GO: |
| 0007263    | Nitric_oxide_mediated_signal_transduction |   |          |          |   |             |  |     |
| _01        | 189                                       | 2 | 0.013636 | 0.521072 | 0 | 0.000236    |  | GO: |
| 0007264    | Small_GTPase_mediated_signal_transduction |   |          |          |   |             |  |     |
| _01        | 50                                        | 0 | 1        | 1        | 0 | 0           |  | GO: |
| 0007265    | Ras_protein_signal_transduction           |   |          |          |   |             |  |     |
| _01        | 27                                        | 0 | 1        | 1        | 0 | 0           |  | GO: |
| 0007266    | Rho_protein_signal_transduction           |   |          |          |   |             |  |     |
| _01        | 172                                       | 0 | 1        | 1        | 0 | 0           |  | GO: |
| 0007267    | Cell-cell_signaling                       |   |          |          |   |             |  |     |
| _01        | 195                                       | 1 | 1        | 1        | 0 | 5e-05       |  | GO: |
| 0007268    | Synaptic_transmission                     |   |          |          |   |             |  |     |
| _01        | 34                                        | 0 | 1        | 1        | 0 | 0           |  | GO: |
| 0007269    | Neurotransmitter_secretion                |   |          |          |   |             |  |     |
| _01        | 10                                        | 0 | 1        | 1        | 0 | 0           |  | GO: |
| 0007271    | Synaptic_transmission,_cholinergic        |   |          |          |   |             |  |     |
| _01        | 8                                         | 0 | 1        | 1        | 0 | 0           |  | GO: |
| 0007274    | Neuromuscular_synaptic_transmission       |   |          |          |   |             |  |     |
| _01        | 613                                       | 3 | 0.012557 | 0.516034 | 0 | 0.000152667 |  |     |
| GO:0007275 | Multicellular_organismal_development      |   |          |          |   |             |  |     |
| _01        | 7                                         | 0 | 1        | 1        | 0 | 0           |  | GO: |
| 0007276    | Gamete_generation                         |   |          |          |   |             |  |     |
| _01        | 15                                        | 0 | 1        | 1        | 0 | 0           |  | GO: |
| 0007281    | Germ_cell_development                     |   |          |          |   |             |  |     |
| _01        | 179                                       | 1 | 1        | 1        | 0 | 0.000339    |  | GO: |
| 0007283    | Spermatogenesis                           |   |          |          |   |             |  |     |
| _01        | 19                                        | 0 | 1        | 1        | 0 | 0           |  | GO: |
| 0007286    | Spermatid_development                     |   |          |          |   |             |  |     |
| _01        | 10                                        | 0 | 1        | 1        | 0 | 0           |  | GO: |
| 0007292    | Female_gamete_generation                  |   |          |          |   |             |  |     |
| _01        | 17                                        | 0 | 1        | 1        | 0 | 0           |  | GO: |
| 0007338    | Single_fertilization                      |   |          |          |   |             |  |     |
| _01        | 9                                         | 0 | 1        | 1        | 0 | 0           |  | GO: |
| 0007339    | Binding_of_sperm_to_zona_pellucida        |   |          |          |   |             |  |     |
| _01        | 8                                         | 0 | 1        | 1        | 0 | 0           |  | GO: |
| 0007340    | Acrosome_reaction                         |   |          |          |   |             |  |     |
| _01        | 5                                         | 1 | 1        | 1        | 0 | 0.000339    |  | GO: |
| 0007342    | Fusion_of_sperm_to_egg_plasma_membrane    |   |          |          |   |             |  |     |
| _01        | 12                                        | 0 | 1        | 1        | 0 | 0           |  | GO: |
| 0007346    | Regulation_of_mitotic_cell_cycle          |   |          |          |   |             |  |     |
| _01        | 23                                        | 0 | 1        | 1        | 0 | 0           |  | GO: |
| 0007368    | Determination_of_left/right_symmetry      |   |          |          |   |             |  |     |
| _01        | 14                                        | 1 | 1        | 1        | 0 | 0.000339    |  | GO: |
| 0007369    | Gastrulation                              |   |          |          |   |             |  |     |
| _01        | 6                                         | 0 | 1        | 1        | 0 | 0           |  | GO: |
| 0007379    | Segment_specification                     |   |          |          |   |             |  |     |
| _01        | 56                                        | 2 | 0.001235 | 0.187451 | 0 | 5.75e-05    |  | GO: |
| 0007389    | Pattern_specification_process             |   |          |          |   |             |  |     |
| _01        | 11                                        | 0 | 1        | 1        | 0 | 0           |  | GO: |
| 0007398    | Ectoderm_development                      |   |          |          |   |             |  |     |
| _01        | 272                                       | 1 | 1        | 1        | 0 | 5e-05       |  | GO: |

|         |                                       |   |   |   |   |         |     |  |
|---------|---------------------------------------|---|---|---|---|---------|-----|--|
| 0007399 | Nervous_system_development            |   |   |   |   |         |     |  |
| _01     | 8                                     | 0 | 1 | 1 | 0 | 0       | G0: |  |
| 0007405 | Neuroblast_proliferation              |   |   |   |   |         |     |  |
| _01     | 43                                    | 0 | 1 | 1 | 0 | 0       | G0: |  |
| 0007409 | Axonogenesis                          |   |   |   |   |         |     |  |
| _01     | 200                                   | 0 | 1 | 1 | 0 | 0       | G0: |  |
| 0007411 | Axon_guidance                         |   |   |   |   |         |     |  |
| _01     | 10                                    | 0 | 1 | 1 | 0 | 0       | G0: |  |
| 0007413 | Axonal_fasciculation                  |   |   |   |   |         |     |  |
| _01     | 29                                    | 0 | 1 | 1 | 0 | 0       | G0: |  |
| 0007416 | Synapse_assembly                      |   |   |   |   |         |     |  |
| _01     | 60                                    | 0 | 1 | 1 | 0 | 0       | G0: |  |
| 0007417 | Central_nervous_system_development    |   |   |   |   |         |     |  |
| _01     | 83                                    | 0 | 1 | 1 | 0 | 0       | G0: |  |
| 0007420 | Brain_development                     |   |   |   |   |         |     |  |
| _01     | 18                                    | 0 | 1 | 1 | 0 | 0       | G0: |  |
| 0007422 | Peripheral_nervous_system_development |   |   |   |   |         |     |  |
| _01     | 15                                    | 0 | 1 | 1 | 0 | 0       | G0: |  |
| 0007492 | Endoderm_development                  |   |   |   |   |         |     |  |
| _01     | 21                                    | 1 | 1 | 1 | 0 | 5e-05   | G0: |  |
| 0007498 | Mesoderm_development                  |   |   |   |   |         |     |  |
| _01     | 80                                    | 0 | 1 | 1 | 0 | 0       | G0: |  |
| 0007507 | Heart_development                     |   |   |   |   |         |     |  |
| _01     | 9                                     | 0 | 1 | 1 | 0 | 0       | G0: |  |
| 0007512 | Adult_heart_development               |   |   |   |   |         |     |  |
| _01     | 62                                    | 0 | 1 | 1 | 0 | 0       | G0: |  |
| 0007517 | Muscle_organ_development              |   |   |   |   |         |     |  |
| _01     | 30                                    | 0 | 1 | 1 | 0 | 0       | G0: |  |
| 0007519 | Skeletal_muscle_tissue_development    |   |   |   |   |         |     |  |
| _01     | 7                                     | 0 | 1 | 1 | 0 | 0       | G0: |  |
| 0007520 | Myoblast_fusion                       |   |   |   |   |         |     |  |
| _01     | 11                                    | 0 | 1 | 1 | 0 | 0       | G0: |  |
| 0007528 | Neuromuscular_junction_development    |   |   |   |   |         |     |  |
| _01     | 5                                     | 0 | 1 | 1 | 0 | 0       | G0: |  |
| 0007530 | Sex_determination                     |   |   |   |   |         |     |  |
| _01     | 12                                    | 0 | 1 | 1 | 0 | 0       | G0: |  |
| 0007548 | Sex_differentiation                   |   |   |   |   |         |     |  |
| _01     | 41                                    | 0 | 1 | 1 | 0 | 0       | G0: |  |
| 0007565 | Female_pregnancy                      |   |   |   |   |         |     |  |
| _01     | 17                                    | 1 | 1 | 1 | 0 | 3.9e-05 | G0: |  |
| 0007566 | Embryo_implantation                   |   |   |   |   |         |     |  |
| _01     | 60                                    | 0 | 1 | 1 | 0 | 0       | G0: |  |
| 0007568 | Aging                                 |   |   |   |   |         |     |  |
| _01     | 21                                    | 0 | 1 | 1 | 0 | 0       | G0: |  |
| 0007569 | Cell_aging                            |   |   |   |   |         |     |  |
| _01     | 51                                    | 0 | 1 | 1 | 0 | 0       | G0: |  |
| 0007584 | Response_to_nutrient                  |   |   |   |   |         |     |  |
| _01     | 23                                    | 0 | 1 | 1 | 0 | 0       | G0: |  |
| 0007585 | Respiratory_gaseous_exchange          |   |   |   |   |         |     |  |
| _01     | 29                                    | 0 | 1 | 1 | 0 | 0       | G0: |  |
| 0007586 | Digestion                             |   |   |   |   |         |     |  |
| _01     | 25                                    | 0 | 1 | 1 | 0 | 0       | G0: |  |
| 0007588 | Excretion                             |   |   |   |   |         |     |  |
| _01     | 8                                     | 0 | 1 | 1 | 0 | 0       | G0: |  |



|            |                                          |   |         |          |   |         |             |     |
|------------|------------------------------------------|---|---------|----------|---|---------|-------------|-----|
| 0007589    | Body_fluid_secretion                     |   |         |          |   |         |             |     |
| _01        | 18                                       | 0 | 1       | 1        | 0 | 0       | 0           | G0: |
| 0007595    | Lactation                                |   |         |          |   |         |             |     |
| _01        | 230                                      | 3 | 0.00111 | 0.175702 | 0 | 0       | 0.000270667 |     |
| G0:0007596 | Blood_coagulation                        |   |         |          |   |         |             |     |
| _01        | 8                                        | 0 | 1       | 1        | 0 | 0       | 0           | G0: |
| 0007597    | Blood_coagulation,_intrinsic_pathway     |   |         |          |   |         |             |     |
| _01        | 5                                        | 0 | 1       | 1        | 0 | 0       | 0           | G0: |
| 0007599    | Hemostasis                               |   |         |          |   |         |             |     |
| _01        | 14                                       | 0 | 1       | 1        | 0 | 0       | 0           | G0: |
| 0007600    | Sensory_perception                       |   |         |          |   |         |             |     |
| _01        | 126                                      | 0 | 1       | 1        | 0 | 0       | 0           | G0: |
| 0007601    | Visual_perception                        |   |         |          |   |         |             |     |
| _01        | 19                                       | 0 | 1       | 1        | 0 | 0       | 0           | G0: |
| 0007602    | Phototransduction                        |   |         |          |   |         |             |     |
| _01        | 68                                       | 0 | 1       | 1        | 0 | 0       | 0           | G0: |
| 0007605    | Sensory_perception_of_sound              |   |         |          |   |         |             |     |
| _01        | 291                                      | 0 | 1       | 1        | 0 | 0       | 0           | G0: |
| 0007608    | Sensory_perception_of_smell              |   |         |          |   |         |             |     |
| _01        | 21                                       | 0 | 1       | 1        | 0 | 0       | 0           | G0: |
| 0007610    | Behavior                                 |   |         |          |   |         |             |     |
| _01        | 19                                       | 0 | 1       | 1        | 0 | 0       | 0           | G0: |
| 0007611    | Learning_or_memory                       |   |         |          |   |         |             |     |
| _01        | 20                                       | 0 | 1       | 1        | 0 | 0       | 0           | G0: |
| 0007612    | Learning                                 |   |         |          |   |         |             |     |
| _01        | 22                                       | 1 | 1       | 1        | 0 | 3.9e-05 | 0           | G0: |
| 0007613    | Memory                                   |   |         |          |   |         |             |     |
| _01        | 9                                        | 0 | 1       | 1        | 0 | 0       | 0           | G0: |
| 0007616    | Long-term_memory                         |   |         |          |   |         |             |     |
| _01        | 5                                        | 0 | 1       | 1        | 0 | 0       | 0           | G0: |
| 0007617    | Mating_behavior                          |   |         |          |   |         |             |     |
| _01        | 25                                       | 0 | 1       | 1        | 0 | 0       | 0           | G0: |
| 0007623    | Circadian_rhythm                         |   |         |          |   |         |             |     |
| _01        | 10                                       | 0 | 1       | 1        | 0 | 0       | 0           | G0: |
| 0007625    | Grooming_behavior                        |   |         |          |   |         |             |     |
| _01        | 37                                       | 1 | 1       | 1        | 0 | 6.4e-05 | 0           | G0: |
| 0007626    | Locomotory_behavior                      |   |         |          |   |         |             |     |
| _01        | 12                                       | 0 | 1       | 1        | 0 | 0       | 0           | G0: |
| 0007628    | Adult_walking_behavior                   |   |         |          |   |         |             |     |
| _01        | 18                                       | 0 | 1       | 1        | 0 | 0       | 0           | G0: |
| 0007631    | Feeding_behavior                         |   |         |          |   |         |             |     |
| _01        | 32                                       | 0 | 1       | 1        | 0 | 0       | 0           | G0: |
| 0008009    | Chemokine_activity                       |   |         |          |   |         |             |     |
| _01        | 27                                       | 0 | 1       | 1        | 0 | 0       | 0           | G0: |
| 0008013    | Beta-catenin_binding                     |   |         |          |   |         |             |     |
| _01        | 27                                       | 0 | 1       | 1        | 0 | 0       | 0           | G0: |
| 0008015    | Blood_circulation                        |   |         |          |   |         |             |     |
| _01        | 25                                       | 0 | 1       | 1        | 0 | 0       | 0           | G0: |
| 0008016    | Regulation_of_heart_contraction          |   |         |          |   |         |             |     |
| _01        | 43                                       | 0 | 1       | 1        | 0 | 0       | 0           | G0: |
| 0008017    | Microtubule_binding                      |   |         |          |   |         |             |     |
| _01        | 5                                        | 0 | 1       | 1        | 0 | 0       | 0           | G0: |
| 0008020    | G-protein_coupled_photoreceptor_activity |   |         |          |   |         |             |     |
| _01        | 36                                       | 0 | 1       | 1        | 0 | 0       | 0           | G0: |

|            |                                                        |   |            |          |   |         |     |  |
|------------|--------------------------------------------------------|---|------------|----------|---|---------|-----|--|
| 0008021    | Synaptic_vesicle                                       |   |            |          |   |         |     |  |
| _01        | 102                                                    | 0 | 1          | 1        | 0 | 0       | G0: |  |
| 0008022    | Protein_C-terminus_binding                             |   |            |          |   |         |     |  |
| _01        | 10                                                     | 0 | 1          | 1        | 0 | 0       | G0: |  |
| 0008023    | Transcription_elongation_factor_complex                |   |            |          |   |         |     |  |
| _01        | 41                                                     | 1 | 1          | 1        | 0 | 5.9e-05 | G0: |  |
| 0008026    | ATP-dependent_helicase_activity                        |   |            |          |   |         |     |  |
| _01        | 8                                                      | 0 | 1          | 1        | 0 | 0       | G0: |  |
| 0008028    | Monocarboxylic_acid_transmembrane_transporter_activity |   |            |          |   |         |     |  |
| _01        | 38                                                     | 0 | 1          | 1        | 0 | 0       | G0: |  |
| 0008033    | TRNA_processing                                        |   |            |          |   |         |     |  |
| _01        | 5                                                      | 0 | 1          | 1        | 0 | 0       | G0: |  |
| 0008035    | High-density_lipoprotein_binding                       |   |            |          |   |         |     |  |
| _01        | 7                                                      | 0 | 1          | 1        | 0 | 0       | G0: |  |
| 0008037    | Cell_recognition                                       |   |            |          |   |         |     |  |
| _01        | 5                                                      | 0 | 1          | 1        | 0 | 0       | G0: |  |
| 0008038    | Neuron_recognition                                     |   |            |          |   |         |     |  |
| _01        | 10                                                     | 0 | 1          | 1        | 0 | 0       | G0: |  |
| 0008045    | Motor_axon_guidance                                    |   |            |          |   |         |     |  |
| _01        | 30                                                     | 0 | 1          | 1        | 0 | 0       | G0: |  |
| 0008047    | Enzyme_activator_activity                              |   |            |          |   |         |     |  |
| _01        | 21                                                     | 0 | 1          | 1        | 0 | 0       | G0: |  |
| 0008060    | ARF_GTPase_activator_activity                          |   |            |          |   |         |     |  |
| _01        | 11                                                     | 0 | 1          | 1        | 0 | 0       | G0: |  |
| 0008066    | Glutamate_receptor_activity                            |   |            |          |   |         |     |  |
| _01        | 64                                                     | 0 | 1          | 1        | 0 | 0       | G0: |  |
| 0008076    | Voltage-gated_potassium_channel_complex                |   |            |          |   |         |     |  |
| _01        | 15                                                     | 0 | 1          | 1        | 0 | 0       | G0: |  |
| 0008080    | N-acetyltransferase_activity                           |   |            |          |   |         |     |  |
| _01        | 6                                                      | 0 | 1          | 1        | 0 | 0       | G0: |  |
| 0008081    | Phosphoric_diester_hydrolase_activity                  |   |            |          |   |         |     |  |
| _01        | 119                                                    | 1 | 1          | 1        | 0 | 5.2e-05 | G0: |  |
| 0008083    | Growth_factor_activity                                 |   |            |          |   |         |     |  |
| _01        | 6                                                      | 0 | 1          | 1        | 0 | 0       | G0: |  |
| 0008091    | Spectrin                                               |   |            |          |   |         |     |  |
| _01        | 27                                                     | 1 | 1          | 1        | 0 | 5e-05   | G0: |  |
| 0008092    | Cytoskeletal_protein_binding                           |   |            |          |   |         |     |  |
| _01        | 14                                                     | 0 | 1          | 1        | 0 | 0       | G0: |  |
| 0008093    | Cytoskeletal_adaptor_activity                          |   |            |          |   |         |     |  |
| _01        | 14                                                     | 0 | 1          | 1        | 0 | 0       | G0: |  |
| 0008094    | DNA-dependent_ATPase_activity                          |   |            |          |   |         |     |  |
| _01        | 36                                                     | 0 | 1          | 1        | 0 | 0       | G0: |  |
| 0008104    | Protein_localization                                   |   |            |          |   |         |     |  |
| _01        | 6                                                      | 0 | 1          | 1        | 0 | 0       | G0: |  |
| 0008113    | Peptide-methionine-(S)-S-oxide_reductase_activity      |   |            |          |   |         |     |  |
| _01        | 145                                                    | 2 | 0.00613999 | 0.407546 | 0 | 6.6e-05 | G0: |  |
| G0:0008134 | Transcription_factor_binding                           |   |            |          |   |         |     |  |
| _01        | 13                                                     | 0 | 1          | 1        | 0 | 0       | G0: |  |
| 0008135    | Translation_factor_activity,_nucleic_acid_binding      |   |            |          |   |         |     |  |
| _01        | 18                                                     | 0 | 1          | 1        | 0 | 0       | G0: |  |
| 0008137    | NADH_dehydrogenase_(ubiquinone)_activity               |   |            |          |   |         |     |  |
| _01        | 21                                                     | 0 | 1          | 1        | 0 | 0       | G0: |  |
| 0008138    | Protein_tyrosine/serine/threonine_phosphatase_activity |   |            |          |   |         |     |  |
| _01        | 7                                                      | 0 | 1          | 1        | 0 | 0       | G0: |  |

|         |                                          |   |          |          |   |          |  |     |
|---------|------------------------------------------|---|----------|----------|---|----------|--|-----|
| 0008139 | Nuclear_localization_sequence_binding    |   |          |          |   |          |  |     |
| _01     | 8                                        | 0 | 1        | 1        | 0 | 0        |  | GO: |
| 0008143 | Poly(A)_RNA_binding                      |   |          |          |   |          |  |     |
| _01     | 37                                       | 0 | 1        | 1        | 0 | 0        |  | GO: |
| 0008144 | Drug_binding                             |   |          |          |   |          |  |     |
| _01     | 25                                       | 0 | 1        | 1        | 0 | 0        |  | GO: |
| 0008146 | Sulfotransferase_activity                |   |          |          |   |          |  |     |
| _01     | 361                                      | 1 | 1        | 1        | 0 | 0.000423 |  | GO: |
| 0008150 | Biological_process                       |   |          |          |   |          |  |     |
| _01     | 119                                      | 1 | 1        | 1        | 0 | 8.3e-05  |  | GO: |
| 0008152 | Metabolic_process                        |   |          |          |   |          |  |     |
| _01     | 5                                        | 0 | 1        | 1        | 0 | 0        |  | GO: |
| 0008154 | Actin_polymerization_or_depolymerization |   |          |          |   |          |  |     |
| _01     | 11                                       | 0 | 1        | 1        | 0 | 0        |  | GO: |
| 0008156 | Negative_regulation_of_DNA_replication   |   |          |          |   |          |  |     |
| _01     | 5                                        | 0 | 1        | 1        | 0 | 0        |  | GO: |
| 0008158 | Hedgehog_receptor_activity               |   |          |          |   |          |  |     |
| _01     | 67                                       | 1 | 1        | 1        | 0 | 0.000423 |  | GO: |
| 0008168 | Methyltransferase_activity               |   |          |          |   |          |  |     |
| _01     | 5                                        | 0 | 1        | 1        | 0 | 0        |  | GO: |
| 0008180 | Signalosome                              |   |          |          |   |          |  |     |
| _01     | 7                                        | 0 | 1        | 1        | 0 | 0        |  | GO: |
| 0008188 | Neuropeptide_receptor_activity           |   |          |          |   |          |  |     |
| _01     | 9                                        | 0 | 1        | 1        | 0 | 0        |  | GO: |
| 0008191 | Metalloendopeptidase_inhibitor_activity  |   |          |          |   |          |  |     |
| _01     | 8                                        | 0 | 1        | 1        | 0 | 0        |  | GO: |
| 0008195 | Phosphatidate_phosphatase_activity       |   |          |          |   |          |  |     |
| _01     | 10                                       | 0 | 1        | 1        | 0 | 0        |  | GO: |
| 0008198 | Ferrous_iron_binding                     |   |          |          |   |          |  |     |
| _01     | 7                                        | 0 | 1        | 1        | 0 | 0        |  | GO: |
| 0008199 | Ferric_iron_binding                      |   |          |          |   |          |  |     |
| _01     | 5                                        | 0 | 1        | 1        | 0 | 0        |  | GO: |
| 0008200 | Ion_channel_inhibitor_activity           |   |          |          |   |          |  |     |
| _01     | 80                                       | 1 | 1        | 1        | 0 | 0.000339 |  | GO: |
| 0008201 | Heparin_binding                          |   |          |          |   |          |  |     |
| _01     | 47                                       | 0 | 1        | 1        | 0 | 0        |  | GO: |
| 0008202 | Steroid_metabolic_process                |   |          |          |   |          |  |     |
| _01     | 37                                       | 0 | 1        | 1        | 0 | 0        |  | GO: |
| 0008203 | Cholesterol_metabolic_process            |   |          |          |   |          |  |     |
| _01     | 19                                       | 0 | 1        | 1        | 0 | 0        |  | GO: |
| 0008206 | Bile_acid_metabolic_process              |   |          |          |   |          |  |     |
| _01     | 5                                        | 0 | 1        | 1        | 0 | 0        |  | GO: |
| 0008209 | Androgen_metabolic_process               |   |          |          |   |          |  |     |
| _01     | 8                                        | 0 | 1        | 1        | 0 | 0        |  | GO: |
| 0008210 | Estrogen_metabolic_process               |   |          |          |   |          |  |     |
| _01     | 37                                       | 1 | 1        | 1        | 0 | 3.9e-05  |  | GO: |
| 0008217 | Regulation_of_blood_pressure             |   |          |          |   |          |  |     |
| _01     | 89                                       | 0 | 1        | 1        | 0 | 0        |  | GO: |
| 0008219 | Cell_death                               |   |          |          |   |          |  |     |
| _01     | 293                                      | 2 | 0.019572 | 0.577468 | 0 | 7.35e-05 |  | GO: |
| 0008233 | Peptidase_activity                       |   |          |          |   |          |  |     |
| _01     | 34                                       | 0 | 1        | 1        | 0 | 0        |  | GO: |
| 0008234 | Cysteine-type_peptidase_activity         |   |          |          |   |          |  |     |
| _01     | 7                                        | 0 | 1        | 1        | 0 | 0        |  | GO: |

|         |                                                                    |   |   |   |   |          |     |  |
|---------|--------------------------------------------------------------------|---|---|---|---|----------|-----|--|
| 0008235 | Metalloexopeptidase_activity                                       |   |   |   |   |          |     |  |
| _01     | 28                                                                 | 0 | 1 | 1 | 0 | 0        | G0: |  |
| 0008236 | Serine-type_peptidase_activity                                     |   |   |   |   |          |     |  |
| _01     | 58                                                                 | 1 | 1 | 1 | 0 | 6.4e-05  | G0: |  |
| 0008237 | Metallopeptidase_activity                                          |   |   |   |   |          |     |  |
| _01     | 7                                                                  | 0 | 1 | 1 | 0 | 0        | G0: |  |
| 0008239 | Dipeptidyl-peptidase_activity                                      |   |   |   |   |          |     |  |
| _01     | 7                                                                  | 0 | 1 | 1 | 0 | 0        | G0: |  |
| 0008250 | Oligosaccharyltransferase_complex                                  |   |   |   |   |          |     |  |
| _01     | 6                                                                  | 0 | 1 | 1 | 0 | 0        | G0: |  |
| 0008253 | 5'-nucleotidase_activity                                           |   |   |   |   |          |     |  |
| _01     | 5                                                                  | 0 | 1 | 1 | 0 | 0        | G0: |  |
| 0008266 | Poly(U)_RNA_binding                                                |   |   |   |   |          |     |  |
| _01     | 5                                                                  | 0 | 1 | 1 | 0 | 0        | G0: |  |
| 0008271 | Secondary_active_sulfate_transmembrane_transporter_activity        |   |   |   |   |          |     |  |
| _01     | 10                                                                 | 0 | 1 | 1 | 0 | 0        | G0: |  |
| 0008272 | Sulfate_transport                                                  |   |   |   |   |          |     |  |
| _01     | 9                                                                  | 0 | 1 | 1 | 0 | 0        | G0: |  |
| 0008276 | Protein_methyltransferase_activity                                 |   |   |   |   |          |     |  |
| _01     | 18                                                                 | 0 | 1 | 1 | 0 | 0        | G0: |  |
| 0008277 | Regulation_of_G-protein_coupled_receptor_protein_signaling_pathway |   |   |   |   |          |     |  |
| _01     | 195                                                                | 1 | 1 | 1 | 0 | 0.000344 | G0: |  |
| 0008283 | Cell_proliferation                                                 |   |   |   |   |          |     |  |
| _01     | 220                                                                | 0 | 1 | 1 | 0 | 0        | G0: |  |
| 0008284 | Positive_regulation_of_cell_proliferation                          |   |   |   |   |          |     |  |
| _01     | 218                                                                | 1 | 1 | 1 | 0 | 3.9e-05  | G0: |  |
| 0008285 | Negative_regulation_of_cell_proliferation                          |   |   |   |   |          |     |  |
| _01     | 97                                                                 | 0 | 1 | 1 | 0 | 0        | G0: |  |
| 0008286 | Insulin_receptor_signaling_pathway                                 |   |   |   |   |          |     |  |
| _01     | 6                                                                  | 1 | 1 | 1 | 0 | 0.000339 | G0: |  |
| 0008287 | Protein_serine/threonine_phosphatase_complex                       |   |   |   |   |          |     |  |
| _01     | 86                                                                 | 1 | 1 | 1 | 0 | 3.9e-05  | G0: |  |
| 0008289 | Lipid_binding                                                      |   |   |   |   |          |     |  |
| _01     | 6                                                                  | 1 | 1 | 1 | 0 | 6.9e-05  | G0: |  |
| 0008290 | F-actin_capping_protein_complex                                    |   |   |   |   |          |     |  |
| _01     | 11                                                                 | 0 | 1 | 1 | 0 | 0        | G0: |  |
| 0008299 | Isoprenoid_biosynthetic_process                                    |   |   |   |   |          |     |  |
| _01     | 33                                                                 | 1 | 1 | 1 | 0 | 6.3e-05  | G0: |  |
| 0008301 | DNA_bending_activity                                               |   |   |   |   |          |     |  |
| _01     | 17                                                                 | 0 | 1 | 1 | 0 | 0        | G0: |  |
| 0008305 | Integrin_complex                                                   |   |   |   |   |          |     |  |
| _01     | 6                                                                  | 0 | 1 | 1 | 0 | 0        | G0: |  |
| 0008306 | Associative_learning                                               |   |   |   |   |          |     |  |
| _01     | 33                                                                 | 0 | 1 | 1 | 0 | 0        | G0: |  |
| 0008307 | Structural_constituent_of_muscle                                   |   |   |   |   |          |     |  |
| _01     | 5                                                                  | 0 | 1 | 1 | 0 | 0        | G0: |  |
| 0008312 | 7S_RNA_binding                                                     |   |   |   |   |          |     |  |
| _01     | 11                                                                 | 0 | 1 | 1 | 0 | 0        | G0: |  |
| 0008324 | Cation_transmembrane_transporter_activity                          |   |   |   |   |          |     |  |
| _01     | 12                                                                 | 0 | 1 | 1 | 0 | 0        | G0: |  |
| 0008333 | Endosome_to_lysome_transport                                       |   |   |   |   |          |     |  |
| _01     | 6                                                                  | 0 | 1 | 1 | 0 | 0        | G0: |  |
| 0008334 | Histone_mRNA_metabolic_process                                     |   |   |   |   |          |     |  |

|         |                                                             |   |   |   |   |          |     |
|---------|-------------------------------------------------------------|---|---|---|---|----------|-----|
| _01     | 5                                                           | 0 | 1 | 1 | 0 | 0        | G0: |
| 0008340 | Determination_of_adult_lifespan                             |   |   |   |   |          |     |
| _01     | 6                                                           | 0 | 1 | 1 | 0 | 0        | G0: |
| 0008343 | Adult_feeding_behavior                                      |   |   |   |   |          |     |
| _01     | 12                                                          | 0 | 1 | 1 | 0 | 0        | G0: |
| 0008344 | Adult_locomotory_behavior                                   |   |   |   |   |          |     |
| _01     | 8                                                           | 0 | 1 | 1 | 0 | 0        | G0: |
| 0008353 | RNA_polymerase_II_carboxy-terminal_domain_kinase_activity   |   |   |   |   |          |     |
| _01     | 43                                                          | 1 | 1 | 1 | 0 | 5e-05    | G0: |
| 0008360 | Regulation_of_cell_shape                                    |   |   |   |   |          |     |
| _01     | 12                                                          | 0 | 1 | 1 | 0 | 0        | G0: |
| 0008373 | Sialyltransferase_activity                                  |   |   |   |   |          |     |
| _01     | 8                                                           | 0 | 1 | 1 | 0 | 0        | G0: |
| 0008375 | Acetylglucosaminyltransferase_activity                      |   |   |   |   |          |     |
| _01     | 13                                                          | 1 | 1 | 1 | 0 | 0.000423 | G0: |
| 0008378 | Galactosyltransferase_activity                              |   |   |   |   |          |     |
| _01     | 183                                                         | 1 | 1 | 1 | 0 | 5.2e-05  | G0: |
| 0008380 | RNA_splicing                                                |   |   |   |   |          |     |
| _01     | 6                                                           | 0 | 1 | 1 | 0 | 0        | G0: |
| 0008406 | Gonad_development                                           |   |   |   |   |          |     |
| _01     | 10                                                          | 0 | 1 | 1 | 0 | 0        | G0: |
| 0008408 | 3'-5'_exonuclease_activity                                  |   |   |   |   |          |     |
| _01     | 6                                                           | 0 | 1 | 1 | 0 | 0        | G0: |
| 0008409 | 5'-3'_exonuclease_activity                                  |   |   |   |   |          |     |
| _01     | 76                                                          | 0 | 1 | 1 | 0 | 0        | G0: |
| 0008415 | Acyltransferase_activity                                    |   |   |   |   |          |     |
| _01     | 5                                                           | 0 | 1 | 1 | 0 | 0        | G0: |
| 0008417 | Fucosyltransferase_activity                                 |   |   |   |   |          |     |
| _01     | 12                                                          | 0 | 1 | 1 | 0 | 0        | G0: |
| 0008430 | Selenium_binding                                            |   |   |   |   |          |     |
| _01     | 5                                                           | 0 | 1 | 1 | 0 | 0        | G0: |
| 0008467 | [heparan_sulfate]-glucosamine_3-sulfotransferase_1_activity |   |   |   |   |          |     |
| _01     | 5                                                           | 0 | 1 | 1 | 0 | 0        | G0: |
| 0008483 | Transaminase_activity                                       |   |   |   |   |          |     |
| _01     | 5                                                           | 0 | 1 | 1 | 0 | 0        | G0: |
| 0008503 | Benzodiazepine_receptor_activity                            |   |   |   |   |          |     |
| _01     | 5                                                           | 0 | 1 | 1 | 0 | 0        | G0: |
| 0008509 | Anion_transmembrane_transporter_activity                    |   |   |   |   |          |     |
| _01     | 5                                                           | 0 | 1 | 1 | 0 | 0        | G0: |
| 0008514 | Organic_anion_transmembrane_transporter_activity            |   |   |   |   |          |     |
| _01     | 4                                                           | 0 | 1 | 1 | 0 | 0        | G0: |
| 0008519 | Ammonium_transmembrane_transporter_activity                 |   |   |   |   |          |     |
| _01     | 5                                                           | 0 | 1 | 1 | 0 | 0        | G0: |
| 0008527 | Taste_receptor_activity                                     |   |   |   |   |          |     |
| _01     | 6                                                           | 0 | 1 | 1 | 0 | 0        | G0: |
| 0008528 | Peptide_receptor_activity,_G-protein_coupled                |   |   |   |   |          |     |
| _01     | 6                                                           | 0 | 1 | 1 | 0 | 0        | G0: |
| 0008535 | Respiratory_chain_complex_IV_assembly                       |   |   |   |   |          |     |
| _01     | 7                                                           | 0 | 1 | 1 | 0 | 0        | G0: |
| 0008536 | Ran_GTPase_binding                                          |   |   |   |   |          |     |
| _01     | 14                                                          | 0 | 1 | 1 | 0 | 0        | G0: |
| 0008542 | Visual_learning                                             |   |   |   |   |          |     |
| _01     | 38                                                          | 0 | 1 | 1 | 0 | 0        | G0: |
| 0008543 | Fibroblast_growth_factor_receptor_signaling_pathway         |   |   |   |   |          |     |

|         |                                                                              |   |   |   |   |          |     |
|---------|------------------------------------------------------------------------------|---|---|---|---|----------|-----|
| _01     | 54                                                                           | 0 | 1 | 1 | 0 | 0        | G0: |
| 0008544 | Epidermis_development                                                        |   |   |   |   |          |     |
| _01     | 7                                                                            | 0 | 1 | 1 | 0 | 0        | G0: |
| 0008553 | Hydrogen-exporting_ATPase_activity,_phosphorylative_mechanism                |   |   |   |   |          |     |
| _01     | 47                                                                           | 0 | 1 | 1 | 0 | 0        | G0: |
| 0008565 | Protein_transporter_activity                                                 |   |   |   |   |          |     |
| _01     | 33                                                                           | 0 | 1 | 1 | 0 | 0        | G0: |
| 0008584 | Male_gonad_development                                                       |   |   |   |   |          |     |
| _01     | 7                                                                            | 0 | 1 | 1 | 0 | 0        | G0: |
| 0008585 | Female_gonad_development                                                     |   |   |   |   |          |     |
| _01     | 9                                                                            | 0 | 1 | 1 | 0 | 0        | G0: |
| 0008589 | Regulation_of_smoothened_signaling_pathway                                   |   |   |   |   |          |     |
| _01     | 6                                                                            | 0 | 1 | 1 | 0 | 0        | G0: |
| 0008595 | Anterior/posterior_axis_specification,_embryo                                |   |   |   |   |          |     |
| _01     | 13                                                                           | 0 | 1 | 1 | 0 | 0        | G0: |
| 0008601 | Protein_phosphatase_type_2A_regulator_activity                               |   |   |   |   |          |     |
| _01     | 6                                                                            | 0 | 1 | 1 | 0 | 0        | G0: |
| 0008603 | CAMP-dependent_protein_kinase_regulator_activity                             |   |   |   |   |          |     |
| _01     | 13                                                                           | 0 | 1 | 1 | 0 | 0        | G0: |
| 0008610 | Lipid_biosynthetic_process                                                   |   |   |   |   |          |     |
| _01     | 52                                                                           | 0 | 1 | 1 | 0 | 0        | G0: |
| 0008624 | Induction_of_apoptosis_by_extracellular_signals                              |   |   |   |   |          |     |
| _01     | 6                                                                            | 1 | 1 | 1 | 0 | 0.000423 | G0: |
| 0008625 | Induction_of_apoptosis_via_death_domain_receptors                            |   |   |   |   |          |     |
| _01     | 28                                                                           | 1 | 1 | 1 | 0 | 0.000423 | G0: |
| 0008629 | Induction_of_apoptosis_by_intracellular_signals                              |   |   |   |   |          |     |
| _01     | 10                                                                           | 0 | 1 | 1 | 0 | 0        | G0: |
| 0008630 | DNA_damage_response,_signal_transduction_resulting_in_induction_of_apoptosis |   |   |   |   |          |     |
| _01     | 6                                                                            | 1 | 1 | 1 | 0 | 0.000423 | G0: |
| 0008631 | Induction_of_apoptosis_by_oxidative_stress                                   |   |   |   |   |          |     |
| _01     | 19                                                                           | 0 | 1 | 1 | 0 | 0        | G0: |
| 0008633 | Activation_of_pro-apoptotic_gene_products                                    |   |   |   |   |          |     |
| _01     | 5                                                                            | 1 | 1 | 1 | 0 | 6.3e-05  | G0: |
| 0008634 | Negative_regulation_of_survival_gene_product_expression                      |   |   |   |   |          |     |
| _01     | 6                                                                            | 1 | 1 | 1 | 0 | 0.000423 | G0: |
| 0008635 | Activation_of_caspase_activity_by_cytochrome_c                               |   |   |   |   |          |     |
| _01     | 6                                                                            | 0 | 1 | 1 | 0 | 0        | G0: |
| 0008637 | Apoptotic_mitochondrial_changes                                              |   |   |   |   |          |     |
| _01     | 22                                                                           | 0 | 1 | 1 | 0 | 0        | G0: |
| 0008643 | Carbohydrate_transport                                                       |   |   |   |   |          |     |
| _01     | 24                                                                           | 0 | 1 | 1 | 0 | 0        | G0: |
| 0008645 | Hexose_transport                                                             |   |   |   |   |          |     |
| _01     | 18                                                                           | 0 | 1 | 1 | 0 | 0        | G0: |
| 0008652 | Cellular_amino_acid_biosynthetic_process                                     |   |   |   |   |          |     |
| _01     | 29                                                                           | 0 | 1 | 1 | 0 | 0        | G0: |
| 0008654 | Phospholipid_biosynthetic_process                                            |   |   |   |   |          |     |
| _01     | 7                                                                            | 0 | 1 | 1 | 0 | 0        | G0: |
| 0008656 | Caspase_activator_activity                                                   |   |   |   |   |          |     |
| _01     | 5                                                                            | 1 | 1 | 1 | 0 | 0.000344 | G0: |
| 0008889 | Glycerophosphodiester_phosphodiesterase_activity                             |   |   |   |   |          |     |
| _01     | 89                                                                           | 0 | 1 | 1 | 0 | 0        | G0: |

|         |                                                          |   |   |   |   |   |  |     |
|---------|----------------------------------------------------------|---|---|---|---|---|--|-----|
| 0009055 | Electron_carrier_activity                                |   |   |   |   |   |  |     |
| _01     | 27                                                       | 0 | 1 | 1 | 0 | 0 |  | G0: |
| 0009058 | Biosynthetic_process                                     |   |   |   |   |   |  |     |
| _01     | 7                                                        | 0 | 1 | 1 | 0 | 0 |  | G0: |
| 0009060 | Aerobic_respiration                                      |   |   |   |   |   |  |     |
| _01     | 6                                                        | 0 | 1 | 1 | 0 | 0 |  | G0: |
| 0009062 | Fatty_acid_catabolic_process                             |   |   |   |   |   |  |     |
| _01     | 6                                                        | 0 | 1 | 1 | 0 | 0 |  | G0: |
| 0009072 | Aromatic_amino_acid_family_metabolic_process             |   |   |   |   |   |  |     |
| _01     | 11                                                       | 0 | 1 | 1 | 0 | 0 |  | G0: |
| 0009083 | Branched_chain_family_amino_acid_catabolic_process       |   |   |   |   |   |  |     |
| _01     | 5                                                        | 0 | 1 | 1 | 0 | 0 |  | G0: |
| 0009100 | Glycoprotein_metabolic_process                           |   |   |   |   |   |  |     |
| _01     | 6                                                        | 0 | 1 | 1 | 0 | 0 |  | G0: |
| 0009101 | Glycoprotein_biosynthetic_process                        |   |   |   |   |   |  |     |
| _01     | 5                                                        | 0 | 1 | 1 | 0 | 0 |  | G0: |
| 0009103 | Lipopolysaccharide_biosynthetic_process                  |   |   |   |   |   |  |     |
| _01     | 8                                                        | 0 | 1 | 1 | 0 | 0 |  | G0: |
| 0009116 | Nucleoside_metabolic_process                             |   |   |   |   |   |  |     |
| _01     | 18                                                       | 0 | 1 | 1 | 0 | 0 |  | G0: |
| 0009117 | Nucleotide_metabolic_process                             |   |   |   |   |   |  |     |
| _01     | 13                                                       | 0 | 1 | 1 | 0 | 0 |  | G0: |
| 0009168 | Purine_ribonucleoside_monophosphate_biosynthetic_process |   |   |   |   |   |  |     |
| _01     | 12                                                       | 0 | 1 | 1 | 0 | 0 |  | G0: |
| 0009267 | Cellular_response_to_starvation                          |   |   |   |   |   |  |     |
| _01     | 6                                                        | 0 | 1 | 1 | 0 | 0 |  | G0: |
| 0009268 | Response_to_pH                                           |   |   |   |   |   |  |     |
| _01     | 9                                                        | 0 | 1 | 1 | 0 | 0 |  | G0: |
| 0009303 | RRNA_transcription                                       |   |   |   |   |   |  |     |
| _01     | 12                                                       | 0 | 1 | 1 | 0 | 0 |  | G0: |
| 0009306 | Protein_secretion                                        |   |   |   |   |   |  |     |
| _01     | 7                                                        | 0 | 1 | 1 | 0 | 0 |  | G0: |
| 0009311 | Oligosaccharide_metabolic_process                        |   |   |   |   |   |  |     |
| _01     | 6                                                        | 0 | 1 | 1 | 0 | 0 |  | G0: |
| 0009312 | Oligosaccharide_biosynthetic_process                     |   |   |   |   |   |  |     |
| _01     | 16                                                       | 0 | 1 | 1 | 0 | 0 |  | G0: |
| 0009314 | Response_to_radiation                                    |   |   |   |   |   |  |     |
| _01     | 8                                                        | 0 | 1 | 1 | 0 | 0 |  | G0: |
| 0009395 | Phospholipid_catabolic_process                           |   |   |   |   |   |  |     |
| _01     | 6                                                        | 0 | 1 | 1 | 0 | 0 |  | G0: |
| 0009396 | Folic_acid-containing_compound_biosynthetic_process      |   |   |   |   |   |  |     |
| _01     | 35                                                       | 0 | 1 | 1 | 0 | 0 |  | G0: |
| 0009408 | Response_to_heat                                         |   |   |   |   |   |  |     |
| _01     | 18                                                       | 0 | 1 | 1 | 0 | 0 |  | G0: |
| 0009409 | Response_to_cold                                         |   |   |   |   |   |  |     |
| _01     | 19                                                       | 0 | 1 | 1 | 0 | 0 |  | G0: |
| 0009411 | Response_to_UV                                           |   |   |   |   |   |  |     |
| _01     | 14                                                       | 0 | 1 | 1 | 0 | 0 |  | G0: |
| 0009416 | Response_to_light_stimulus                               |   |   |   |   |   |  |     |
| _01     | 9                                                        | 0 | 1 | 1 | 0 | 0 |  | G0: |
| 0009434 | Microtubule-based_flagellum                              |   |   |   |   |   |  |     |
| _01     | 6                                                        | 0 | 1 | 1 | 0 | 0 |  | G0: |
| 0009435 | NAD_biosynthetic_process                                 |   |   |   |   |   |  |     |
| _01     | 10                                                       | 0 | 1 | 1 | 0 | 0 |  | G0: |

|           |                                    |                                    |             |          |   |         |  |     |
|-----------|------------------------------------|------------------------------------|-------------|----------|---|---------|--|-----|
| 0009566   | Fertilization                      |                                    |             |          |   |         |  |     |
| _01       | 6                                  | 0                                  | 1           | 1        | 0 | 0       |  | GO: |
| 0009605   | Response_to_external_stimulus      |                                    |             |          |   |         |  |     |
| _01       | 11                                 | 0                                  | 1           | 1        | 0 | 0       |  | GO: |
| 0009607   | Response_to_biotic_stimulus        |                                    |             |          |   |         |  |     |
| _01       | 37                                 | 0                                  | 1           | 1        | 0 | 0       |  | GO: |
| 0009611   | Response_to_wounding               |                                    |             |          |   |         |  |     |
| _01       | 33                                 | 0                                  | 1           | 1        | 0 | 0       |  | GO: |
| 0009612   | Response_to_mechanical_stimulus    |                                    |             |          |   |         |  |     |
| _01       | 81                                 | 0                                  | 1           | 1        | 0 | 0       |  | GO: |
| 0009615   | Response_to_virus                  |                                    |             |          |   |         |  |     |
| _01       | 8                                  | 0                                  | 1           | 1        | 0 | 0       |  | GO: |
| 0009617   | Response_to_bacterium              |                                    |             |          |   |         |  |     |
| _01       | 6                                  | 0                                  | 1           | 1        | 0 | 0       |  | GO: |
| 0009629   | Response_to_gravity                |                                    |             |          |   |         |  |     |
| _01       | 39                                 | 0                                  | 1           | 1        | 0 | 0       |  | GO: |
| 0009636   | Response_to_toxin                  |                                    |             |          |   |         |  |     |
| _01       | 9                                  | 0                                  | 1           | 1        | 0 | 0       |  | GO: |
| 0009650   | UV_protection                      |                                    |             |          |   |         |  |     |
| _01       | 5                                  | 0                                  | 1           | 1        | 0 | 0       |  | GO: |
| 0009651   | Response_to_salt_stress            |                                    |             |          |   |         |  |     |
| _01       | 64                                 | 2                                  | 0.000601999 | 0.124557 | 0 | 0       |  |     |
| 0.0001945 | G0:0009653                         | Anatomical_structure_morphogenesis |             |          |   |         |  |     |
| _01       | 35                                 | 0                                  | 1           | 1        | 0 | 0       |  | GO: |
| 0009725   | Response_to_hormone_stimulus       |                                    |             |          |   |         |  |     |
| _01       | 7                                  | 0                                  | 1           | 1        | 0 | 0       |  | GO: |
| 0009743   | Response_to_carbohydrate_stimulus  |                                    |             |          |   |         |  |     |
| _01       | 5                                  | 0                                  | 1           | 1        | 0 | 0       |  | GO: |
| 0009744   | Response_to_sucrose_stimulus       |                                    |             |          |   |         |  |     |
| _01       | 38                                 | 0                                  | 1           | 1        | 0 | 0       |  | GO: |
| 0009749   | Response_to_glucose_stimulus       |                                    |             |          |   |         |  |     |
| _01       | 5                                  | 1                                  | 1           | 1        | 0 | 3.9e-05 |  | GO: |
| 0009750   | Response_to_fructose_stimulus      |                                    |             |          |   |         |  |     |
| _01       | 29                                 | 0                                  | 1           | 1        | 0 | 0       |  | GO: |
| 0009755   | Hormone-mediated_signaling_pathway |                                    |             |          |   |         |  |     |
| _01       | 69                                 | 1                                  | 1           | 1        | 0 | 6.3e-05 |  | GO: |
| 0009790   | Embryo_development                 |                                    |             |          |   |         |  |     |
| _01       | 41                                 | 0                                  | 1           | 1        | 0 | 0       |  | GO: |
| 0009791   | Post-embryonic_development         |                                    |             |          |   |         |  |     |
| _01       | 8                                  | 0                                  | 1           | 1        | 0 | 0       |  | GO: |
| 0009798   | Axis_specification                 |                                    |             |          |   |         |  |     |
| _01       | 10                                 | 0                                  | 1           | 1        | 0 | 0       |  | GO: |
| 0009880   | Embryonic_pattern_specification    |                                    |             |          |   |         |  |     |
| _01       | 6                                  | 0                                  | 1           | 1        | 0 | 0       |  | GO: |
| 0009881   | Photoreceptor_activity             |                                    |             |          |   |         |  |     |
| _01       | 80                                 | 0                                  | 1           | 1        | 0 | 0       |  | GO: |
| 0009887   | Organ_morphogenesis                |                                    |             |          |   |         |  |     |
| _01       | 22                                 | 0                                  | 1           | 1        | 0 | 0       |  | GO: |
| 0009888   | Tissue_development                 |                                    |             |          |   |         |  |     |
| _01       | 80                                 | 0                                  | 1           | 1        | 0 | 0       |  | GO: |
| 0009897   | External_side_of_plasma_membrane   |                                    |             |          |   |         |  |     |
| _01       | 14                                 | 0                                  | 1           | 1        | 0 | 0       |  | GO: |
| 0009898   | Internal_side_of_plasma_membrane   |                                    |             |          |   |         |  |     |
| _01       | 15                                 | 0                                  | 1           | 1        | 0 | 0       |  | GO: |



|         |                                                   |   |   |   |   |          |  |     |
|---------|---------------------------------------------------|---|---|---|---|----------|--|-----|
| 0009925 | Basal_plasma_membrane                             |   |   |   |   |          |  |     |
| _01     | 9                                                 | 0 | 1 | 1 | 0 | 0        |  | GO: |
| 0009948 | Anterior/posterior_axis_specification             |   |   |   |   |          |  |     |
| _01     | 7                                                 | 0 | 1 | 1 | 0 | 0        |  | GO: |
| 0009950 | Dorsal/ventral_axis_specification                 |   |   |   |   |          |  |     |
| _01     | 62                                                | 0 | 1 | 1 | 0 | 0        |  | GO: |
| 0009952 | Anterior/posterior_pattern_formation              |   |   |   |   |          |  |     |
| _01     | 22                                                | 0 | 1 | 1 | 0 | 0        |  | GO: |
| 0009953 | Dorsal/ventral_pattern_formation                  |   |   |   |   |          |  |     |
| _01     | 10                                                | 0 | 1 | 1 | 0 | 0        |  | GO: |
| 0009954 | Proximal/distal_pattern_formation                 |   |   |   |   |          |  |     |
| _01     | 12                                                | 0 | 1 | 1 | 0 | 0        |  | GO: |
| 0009966 | Regulation_of_signal_transduction                 |   |   |   |   |          |  |     |
| _01     | 7                                                 | 0 | 1 | 1 | 0 | 0        |  | GO: |
| 0009967 | Positive_regulation_of_signal_transduction        |   |   |   |   |          |  |     |
| _01     | 31                                                | 0 | 1 | 1 | 0 | 0        |  | GO: |
| 0009968 | Negative_regulation_of_signal_transduction        |   |   |   |   |          |  |     |
| _01     | 9                                                 | 0 | 1 | 1 | 0 | 0        |  | GO: |
| 0009982 | Pseudouridine_synthase_activity                   |   |   |   |   |          |  |     |
| _01     | 161                                               | 0 | 1 | 1 | 0 | 0        |  | GO: |
| 0009986 | Cell_surface                                      |   |   |   |   |          |  |     |
| _01     | 14                                                | 0 | 1 | 1 | 0 | 0        |  | GO: |
| 0009987 | Cellular_process                                  |   |   |   |   |          |  |     |
| _01     | 9                                                 | 0 | 1 | 1 | 0 | 0        |  | GO: |
| 0010001 | Glial_cell_differentiation                        |   |   |   |   |          |  |     |
| _01     | 63                                                | 0 | 1 | 1 | 0 | 0        |  | GO: |
| 0010008 | Endosome_membrane                                 |   |   |   |   |          |  |     |
| _01     | 21                                                | 0 | 1 | 1 | 0 | 0        |  | GO: |
| 0010033 | Response_to_organic_substance                     |   |   |   |   |          |  |     |
| _01     | 12                                                | 0 | 1 | 1 | 0 | 0        |  | GO: |
| 0010035 | Response_to_inorganic_substance                   |   |   |   |   |          |  |     |
| _01     | 5                                                 | 0 | 1 | 1 | 0 | 0        |  | GO: |
| 0010038 | Response_to_metal_ion                             |   |   |   |   |          |  |     |
| _01     | 12                                                | 0 | 1 | 1 | 0 | 0        |  | GO: |
| 0010043 | Response_to_zinc_ion                              |   |   |   |   |          |  |     |
| _01     | 8                                                 | 0 | 1 | 1 | 0 | 0        |  | GO: |
| 0010165 | Response_to_X-ray                                 |   |   |   |   |          |  |     |
| _01     | 9                                                 | 0 | 1 | 1 | 0 | 0        |  | GO: |
| 0010181 | FMN_binding                                       |   |   |   |   |          |  |     |
| _01     | 18                                                | 0 | 1 | 1 | 0 | 0        |  | GO: |
| 0010212 | Response_to_ionizing_radiation                    |   |   |   |   |          |  |     |
| _01     | 5                                                 | 0 | 1 | 1 | 0 | 0        |  | GO: |
| 0010224 | Response_to_UV-B                                  |   |   |   |   |          |  |     |
| _01     | 5                                                 | 0 | 1 | 1 | 0 | 0        |  | GO: |
| 0010225 | Response_to_UV-C                                  |   |   |   |   |          |  |     |
| _01     | 24                                                | 1 | 1 | 1 | 0 | 3.9e-05  |  | GO: |
| 0010243 | Response_to_organic_nitrogen                      |   |   |   |   |          |  |     |
| _01     | 5                                                 | 0 | 1 | 1 | 0 | 0        |  | GO: |
| 0010269 | Response_to_selenium_ion                          |   |   |   |   |          |  |     |
| _01     | 9                                                 | 1 | 1 | 1 | 0 | 0.000339 |  | GO: |
| 0010288 | Response_to_lead_ion                              |   |   |   |   |          |  |     |
| _01     | 5                                                 | 0 | 1 | 1 | 0 | 0        |  | GO: |
| 0010310 | Regulation_of_hydrogen_peroxide_metabolic_process |   |   |   |   |          |  |     |
| _01     | 16                                                | 0 | 1 | 1 | 0 | 0        |  | GO: |

|         |                                                                                    |   |   |   |   |         |     |  |
|---------|------------------------------------------------------------------------------------|---|---|---|---|---------|-----|--|
| 0010332 | Response_to_gamma_radiation                                                        |   |   |   |   |         |     |  |
| _01     | 6                                                                                  | 0 | 1 | 1 | 0 | 0       | G0: |  |
| 0010390 | Histone_monoubiquitination                                                         |   |   |   |   |         |     |  |
| _01     | 263                                                                                | 1 | 1 | 1 | 0 | 5.2e-05 | G0: |  |
| 0010467 | Gene_expression                                                                    |   |   |   |   |         |     |  |
| _01     | 26                                                                                 | 0 | 1 | 1 | 0 | 0       | G0: |  |
| 0010468 | Regulation_of_gene_expression                                                      |   |   |   |   |         |     |  |
| _01     | 9                                                                                  | 0 | 1 | 1 | 0 | 0       | G0: |  |
| 0010494 | Stress_granule                                                                     |   |   |   |   |         |     |  |
| _01     | 7                                                                                  | 0 | 1 | 1 | 0 | 0       | G0: |  |
| 0010510 | Regulation_of_acetyl-CoA_biosynthetic_process_from_pyruvate                        |   |   |   |   |         |     |  |
| _01     | 10                                                                                 | 0 | 1 | 1 | 0 | 0       | G0: |  |
| 0010524 | Positive_regulation_of_calcium_ion_transport_into_cytosol                          |   |   |   |   |         |     |  |
| _01     | 5                                                                                  | 0 | 1 | 1 | 0 | 0       | G0: |  |
| 0010544 | Negative_regulation_of_platelet_activation                                         |   |   |   |   |         |     |  |
| _01     | 46                                                                                 | 1 | 1 | 1 | 0 | 6.3e-05 | G0: |  |
| 0010551 | Regulation_of_gene-specific_transcription_from_RNA_polymerase_II_promoter          |   |   |   |   |         |     |  |
| _01     | 74                                                                                 | 1 | 1 | 1 | 0 | 6.3e-05 | G0: |  |
| 0010552 | Positive_regulation_of_gene-specific_transcription_from_RNA_polymerase_II_promoter |   |   |   |   |         |     |  |
| _01     | 53                                                                                 | 0 | 1 | 1 | 0 | 0       | G0: |  |
| 0010553 | Negative_regulation_of_gene-specific_transcription_from_RNA_polymerase_II_promoter |   |   |   |   |         |     |  |
| _01     | 9                                                                                  | 1 | 1 | 1 | 0 | 3.9e-05 | G0: |  |
| 0010575 | Positive_regulation_vascular_endothelial_growth_factor_production                  |   |   |   |   |         |     |  |
| _01     | 11                                                                                 | 0 | 1 | 1 | 0 | 0       | G0: |  |
| 0010595 | Positive_regulation_of_endothelial_cell_migration                                  |   |   |   |   |         |     |  |
| _01     | 6                                                                                  | 0 | 1 | 1 | 0 | 0       | G0: |  |
| 0010596 | Negative_regulation_of_endothelial_cell_migration                                  |   |   |   |   |         |     |  |
| _01     | 35                                                                                 | 0 | 1 | 1 | 0 | 0       | G0: |  |
| 0010628 | Positive_regulation_of_gene_expression                                             |   |   |   |   |         |     |  |
| _01     | 26                                                                                 | 0 | 1 | 1 | 0 | 0       | G0: |  |
| 0010629 | Negative_regulation_of_gene_expression                                             |   |   |   |   |         |     |  |
| _01     | 7                                                                                  | 0 | 1 | 1 | 0 | 0       | G0: |  |
| 0010634 | Positive_regulation_of_epithelial_cell_migration                                   |   |   |   |   |         |     |  |
| _01     | 6                                                                                  | 0 | 1 | 1 | 0 | 0       | G0: |  |
| 0010670 | Positive_regulation_of_oxygen_and_reactive_oxygen_species_metabolic_process        |   |   |   |   |         |     |  |
| _01     | 11                                                                                 | 0 | 1 | 1 | 0 | 0       | G0: |  |
| 0010718 | Positive_regulation_of_epithelial_to_mesenchymal_transition                        |   |   |   |   |         |     |  |
| _01     | 5                                                                                  | 0 | 1 | 1 | 0 | 0       | G0: |  |
| 0010719 | Negative_regulation_of_epithelial_to_mesenchymal_transition                        |   |   |   |   |         |     |  |
| _01     | 10                                                                                 | 0 | 1 | 1 | 0 | 0       | G0: |  |
| 0010744 | Positive_regulation_of_macrophage_derived_foam_cell_differentiation                |   |   |   |   |         |     |  |
| _01     | 7                                                                                  | 0 | 1 | 1 | 0 | 0       | G0: |  |
| 0010745 | Negative_regulation_of_macrophage_derived_foam_cell_differentiation                |   |   |   |   |         |     |  |
| _01     | 6                                                                                  | 0 | 1 | 1 | 0 | 0       | G0: |  |
| 0010765 | Positive_regulation_of_sodium_ion_transport                                        |   |   |   |   |         |     |  |
| _01     | 9                                                                                  | 0 | 1 | 1 | 0 | 0       | G0: |  |



|         |                                                                     |   |   |   |   |   |     |
|---------|---------------------------------------------------------------------|---|---|---|---|---|-----|
| _01     | 10                                                                  | 0 | 1 | 1 | 0 | 0 | G0: |
| 0014911 | Positive_regulation_of_smooth_muscle_cell_migration                 |   |   |   |   |   |     |
| _01     | 6                                                                   | 0 | 1 | 1 | 0 | 0 | G0: |
| 0014912 | Negative_regulation_of_smooth_muscle_cell_migration                 |   |   |   |   |   |     |
| _01     | 5                                                                   | 0 | 1 | 1 | 0 | 0 | G0: |
| 0015012 | Heparan_sulfate_proteoglycan_biosynthetic_process                   |   |   |   |   |   |     |
| _01     | 8                                                                   | 0 | 1 | 1 | 0 | 0 | G0: |
| 0015020 | Glucuronosyltransferase_activity                                    |   |   |   |   |   |     |
| _01     | 9                                                                   | 0 | 1 | 1 | 0 | 0 | G0: |
| 0015026 | Coreceptor_activity                                                 |   |   |   |   |   |     |
| _01     | 24                                                                  | 0 | 1 | 1 | 0 | 0 | G0: |
| 0015030 | Cajal_body                                                          |   |   |   |   |   |     |
| _01     | 256                                                                 | 0 | 1 | 1 | 0 | 0 | G0: |
| 0015031 | Protein_transport                                                   |   |   |   |   |   |     |
| _01     | 14                                                                  | 0 | 1 | 1 | 0 | 0 | G0: |
| 0015035 | Protein_disulfide_oxidoreductase_activity                           |   |   |   |   |   |     |
| _01     | 6                                                                   | 0 | 1 | 1 | 0 | 0 | G0: |
| 0015074 | DNA_integration                                                     |   |   |   |   |   |     |
| _01     | 12                                                                  | 0 | 1 | 1 | 0 | 0 | G0: |
| 0015075 | Ion_transmembrane_transporter_activity                              |   |   |   |   |   |     |
| _01     | 14                                                                  | 0 | 1 | 1 | 0 | 0 | G0: |
| 0015078 | Hydrogen_ion_transmembrane_transporter_activity                     |   |   |   |   |   |     |
| _01     | 6                                                                   | 0 | 1 | 1 | 0 | 0 | G0: |
| 0015101 | Organic_cation_transmembrane_transporter_activity                   |   |   |   |   |   |     |
| _01     | 21                                                                  | 0 | 1 | 1 | 0 | 0 | G0: |
| 0015171 | Amino_acid_transmembrane_transporter_activity                       |   |   |   |   |   |     |
| _01     | 5                                                                   | 0 | 1 | 1 | 0 | 0 | G0: |
| 0015175 | Neutral_amino_acid_transmembrane_transporter_activity               |   |   |   |   |   |     |
| _01     | 6                                                                   | 0 | 1 | 1 | 0 | 0 | G0: |
| 0015250 | Water_channel_activity                                              |   |   |   |   |   |     |
| _01     | 7                                                                   | 0 | 1 | 1 | 0 | 0 | G0: |
| 0015267 | Channel_activity                                                    |   |   |   |   |   |     |
| _01     | 8                                                                   | 0 | 1 | 1 | 0 | 0 | G0: |
| 0015269 | Calcium-activated_potassium_channel_activity                        |   |   |   |   |   |     |
| _01     | 6                                                                   | 0 | 1 | 1 | 0 | 0 | G0: |
| 0015277 | Kainate_selective_glutamate_receptor_activity                       |   |   |   |   |   |     |
| _01     | 77                                                                  | 0 | 1 | 1 | 0 | 0 | G0: |
| 0015293 | Symporter_activity                                                  |   |   |   |   |   |     |
| _01     | 23                                                                  | 0 | 1 | 1 | 0 | 0 | G0: |
| 0015297 | Antiporter_activity                                                 |   |   |   |   |   |     |
| _01     | 7                                                                   | 0 | 1 | 1 | 0 | 0 | G0: |
| 0015299 | Solute:hydrogen_antipporter_activity                                |   |   |   |   |   |     |
| _01     | 5                                                                   | 0 | 1 | 1 | 0 | 0 | G0: |
| 0015301 | Anion:anion_antipporter_activity                                    |   |   |   |   |   |     |
| _01     | 6                                                                   | 0 | 1 | 1 | 0 | 0 | G0: |
| 0015321 | Sodium-dependent_phosphate_transmembrane_transporter_activity       |   |   |   |   |   |     |
| _01     | 6                                                                   | 0 | 1 | 1 | 0 | 0 | G0: |
| 0015347 | Sodium-independent_organic_anion_transmembrane_transporter_activity |   |   |   |   |   |     |
| _01     | 5                                                                   | 0 | 1 | 1 | 0 | 0 | G0: |
| 0015355 | Secondary_active_monocarboxylate_transmembrane_transporter_activity |   |   |   |   |   |     |
| _01     | 6                                                                   | 0 | 1 | 1 | 0 | 0 | G0: |



|         |                                            |   |   |   |   |          |     |
|---------|--------------------------------------------|---|---|---|---|----------|-----|
| _01     | 19                                         | 0 | 1 | 1 | 0 | 0        | G0: |
| 0015986 | ATP_synthesis_coupled_proton_transport     |   |   |   |   |          | G0: |
| _01     | 30                                         | 0 | 1 | 1 | 0 | 0        | G0: |
| 0015992 | Proton_transport                           |   |   |   |   |          | G0: |
| _01     | 9                                          | 0 | 1 | 1 | 0 | 0        | G0: |
| 0016010 | Dystrophin-associated_glycoprotein_complex |   |   |   |   |          | G0: |
| _01     | 5                                          | 0 | 1 | 1 | 0 | 0        | G0: |
| 0016012 | Sarcoglycan_complex                        |   |   |   |   |          | G0: |
| _01     | 6                                          | 0 | 1 | 1 | 0 | 0        | G0: |
| 0016018 | Cyclosporin_A_binding                      |   |   |   |   |          | G0: |
| _01     | 64                                         | 1 | 1 | 1 | 0 | 5e-05    | G0: |
| 0016023 | Cytoplasmic_membrane-bounded_vesicle       |   |   |   |   |          | G0: |
| _01     | 195                                        | 0 | 1 | 1 | 0 | 0        | G0: |
| 0016032 | Viral_reproduction                         |   |   |   |   |          | G0: |
| _01     | 56                                         | 1 | 1 | 1 | 0 | 0.000344 | G0: |
| 0016042 | Lipid_catabolic_process                    |   |   |   |   |          | G0: |
| _01     | 11                                         | 0 | 1 | 1 | 0 | 0        | G0: |
| 0016043 | Cellular_component_organization            |   |   |   |   |          | G0: |
| _01     | 41                                         | 0 | 1 | 1 | 0 | 0        | G0: |
| 0016044 | Cellular_membrane_organization             |   |   |   |   |          | G0: |
| _01     | 35                                         | 0 | 1 | 1 | 0 | 0        | G0: |
| 0016049 | Cell_growth                                |   |   |   |   |          | G0: |
| _01     | 5                                          | 0 | 1 | 1 | 0 | 0        | G0: |
| 0016050 | Vesicle_organization                       |   |   |   |   |          | G0: |
| _01     | 13                                         | 0 | 1 | 1 | 0 | 0        | G0: |
| 0016051 | Carbohydrate_biosynthetic_process          |   |   |   |   |          | G0: |
| _01     | 58                                         | 0 | 1 | 1 | 0 | 0        | G0: |
| 0016055 | Wnt_receptor_signaling_pathway             |   |   |   |   |          | G0: |
| _01     | 55                                         | 0 | 1 | 1 | 0 | 0        | G0: |
| 0016070 | RNA_metabolic_process                      |   |   |   |   |          | G0: |
| _01     | 33                                         | 0 | 1 | 1 | 0 | 0        | G0: |
| 0016071 | mRNA_metabolic_process                     |   |   |   |   |          | G0: |
| _01     | 6                                          | 1 | 1 | 1 | 0 | 5e-05    | G0: |
| 0016079 | Synaptic_vesicle_exocytosis                |   |   |   |   |          | G0: |
| _01     | 6                                          | 0 | 1 | 1 | 0 | 0        | G0: |
| 0016126 | Sterol_biosynthetic_process                |   |   |   |   |          | G0: |
| _01     | 5                                          | 0 | 1 | 1 | 0 | 0        | G0: |
| 0016165 | Lipoxygenase_activity                      |   |   |   |   |          | G0: |
| _01     | 8                                          | 0 | 1 | 1 | 0 | 0        | G0: |
| 0016180 | snRNA_processing                           |   |   |   |   |          | G0: |
| _01     | 117                                        | 0 | 1 | 1 | 0 | 0        | G0: |
| 0016192 | Vesicle-mediated_transport                 |   |   |   |   |          | G0: |
| _01     | 17                                         | 0 | 1 | 1 | 0 | 0        | G0: |
| 0016197 | Endosome_transport                         |   |   |   |   |          | G0: |
| _01     | 7                                          | 0 | 1 | 1 | 0 | 0        | G0: |
| 0016208 | AMP_binding                                |   |   |   |   |          | G0: |
| _01     | 9                                          | 0 | 1 | 1 | 0 | 0        | G0: |
| 0016209 | Antioxidant_activity                       |   |   |   |   |          | G0: |
| _01     | 6                                          | 0 | 1 | 1 | 0 | 0        | G0: |
| 0016226 | Iron-sulfur_cluster_assembly               |   |   |   |   |          | G0: |
| _01     | 5                                          | 0 | 1 | 1 | 0 | 0        | G0: |
| 0016234 | Inclusion_body                             |   |   |   |   |          | G0: |
| _01     | 6                                          | 0 | 1 | 1 | 0 | 0        | G0: |
| 0016235 | Aggresome                                  |   |   |   |   |          | G0: |

|         |                                                         |   |          |         |   |          |     |
|---------|---------------------------------------------------------|---|----------|---------|---|----------|-----|
| _01     | 11                                                      | 0 | 1        | 1       | 0 | 0        | G0: |
| 0016251 | General_RNA_polymerase_II_transcription_factor_activity |   |          |         |   |          | G0: |
| _01     | 10                                                      | 0 | 1        | 1       | 0 | 0        | G0: |
| 0016254 | Preassembly_of_GPI_anchor_in_ER_membrane                |   |          |         |   |          | G0: |
| _01     | 5                                                       | 0 | 1        | 1       | 0 | 0        | G0: |
| 0016272 | Prefoldin_complex                                       |   |          |         |   |          | G0: |
| _01     | 79                                                      | 0 | 1        | 1       | 0 | 0        | G0: |
| 0016301 | Kinase_activity                                         |   |          |         |   |          | G0: |
| _01     | 7                                                       | 0 | 1        | 1       | 0 | 0        | G0: |
| 0016303 | 1-phosphatidylinositol-3-kinase_activity                |   |          |         |   |          | G0: |
| _01     | 5                                                       | 0 | 1        | 1       | 0 | 0        | G0: |
| 0016308 | 1-phosphatidylinositol-4-phosphate_5-kinase_activity    |   |          |         |   |          | G0: |
| _01     | 15                                                      | 0 | 1        | 1       | 0 | 0        | G0: |
| 0016310 | Phosphorylation                                         |   |          |         |   |          | G0: |
| _01     | 9                                                       | 0 | 1        | 1       | 0 | 0        | G0: |
| 0016311 | Dephosphorylation                                       |   |          |         |   |          | G0: |
| _01     | 80                                                      | 0 | 1        | 1       | 0 | 0        | G0: |
| 0016323 | Basolateral_plasma_membrane                             |   |          |         |   |          | G0: |
| _01     | 117                                                     | 0 | 1        | 1       | 0 | 0        | G0: |
| 0016324 | Apical_plasma_membrane                                  |   |          |         |   |          | G0: |
| _01     | 14                                                      | 0 | 1        | 1       | 0 | 0        | G0: |
| 0016328 | Lateral_plasma_membrane                                 |   |          |         |   |          | G0: |
| _01     | 9                                                       | 0 | 1        | 1       | 0 | 0        | G0: |
| 0016331 | Morphogenesis_of_embryonic_epithelium                   |   |          |         |   |          | G0: |
| _01     | 54                                                      | 0 | 1        | 1       | 0 | 0        | G0: |
| 0016337 | Cell-cell_adhesion                                      |   |          |         |   |          | G0: |
| _01     | 14                                                      | 0 | 1        | 1       | 0 | 0        | G0: |
| 0016338 | Calcium-independent_cell-cell_adhesion                  |   |          |         |   |          | G0: |
| _01     | 19                                                      | 0 | 1        | 1       | 0 | 0        | G0: |
| 0016339 | Calcium-dependent_cell-cell_adhesion                    |   |          |         |   |          | G0: |
| _01     | 7                                                       | 0 | 1        | 1       | 0 | 0        | G0: |
| 0016342 | Catenin_complex                                         |   |          |         |   |          | G0: |
| _01     | 14                                                      | 0 | 1        | 1       | 0 | 0        | G0: |
| 0016358 | Dendrite_development                                    |   |          |         |   |          | G0: |
| _01     | 44                                                      | 1 | 1        | 1       | 0 | 7.4e-05  | G0: |
| 0016363 | Nuclear_matrix                                          |   |          |         |   |          | G0: |
| _01     | 9                                                       | 0 | 1        | 1       | 0 | 0        | G0: |
| 0016407 | Acetyltransferase_activity                              |   |          |         |   |          | G0: |
| _01     | 5                                                       | 0 | 1        | 1       | 0 | 0        | G0: |
| 0016409 | Palmitoyltransferase_activity                           |   |          |         |   |          | G0: |
| _01     | 23                                                      | 0 | 1        | 1       | 0 | 0        | G0: |
| 0016455 | RNA_polymerase_II_transcription_mediator_activity       |   |          |         |   |          | G0: |
| _01     | 29                                                      | 0 | 1        | 1       | 0 | 0        | G0: |
| 0016459 | Myosin_complex                                          |   |          |         |   |          | G0: |
| _01     | 5                                                       | 0 | 1        | 1       | 0 | 0        | G0: |
| 0016461 | Unconventional_myosin_complex                           |   |          |         |   |          | G0: |
| _01     | 7                                                       | 0 | 1        | 1       | 0 | 0        | G0: |
| 0016471 | Vacuolar_proton-transporting_V-type_ATPase_complex      |   |          |         |   |          | G0: |
| _01     | 51                                                      | 2 | 0.001313 | 0.19455 | 0 | 5.7e-05  | G0: |
| 0016477 | Cell_migration                                          |   |          |         |   |          | G0: |
| _01     | 100                                                     | 1 | 1        | 1       | 0 | 0.000423 | G0: |
| 0016481 | Negative_regulation_of_transcription                    |   |          |         |   |          | G0: |
| _01     | 14                                                      | 0 | 1        | 1       | 0 | 0        | G0: |
| 0016485 | Protein_processing                                      |   |          |         |   |          | G0: |

|         |                                                    |   |            |          |   |           |            |
|---------|----------------------------------------------------|---|------------|----------|---|-----------|------------|
| _01     | 12                                                 | 0 | 1          | 1        | 0 | 0         | G0:        |
| 0016486 | Peptide_hormone_processing                         |   |            |          |   |           |            |
| _01     | 263                                                | 2 | 0.011199   | 0.494678 | 0 | 0.000231  | G0:        |
| 0016491 | Oxidoreductase_activity                            |   |            |          |   |           |            |
| _01     | 14                                                 | 0 | 1          | 1        | 0 | 0         | G0:        |
| 0016493 | C-C_chemokine_receptor_activity                    |   |            |          |   |           |            |
| _01     | 5                                                  | 0 | 1          | 1        | 0 | 0         | G0:        |
| 0016500 | Protein-hormone_receptor_activity                  |   |            |          |   |           |            |
| _01     | 4                                                  | 0 | 1          | 1        | 0 | 0         | G0:        |
| 0016503 | Pheromone_receptor_activity                        |   |            |          |   |           |            |
| _01     | 10                                                 | 0 | 1          | 1        | 0 | 0         | G0:        |
| 0016514 | SWI/SNF_complex                                    |   |            |          |   |           |            |
| _01     | 22                                                 | 0 | 1          | 1        | 0 | 0         | G0:        |
| 0016525 | Negative_regulation_of_angiogenesis                |   |            |          |   |           |            |
| _01     | 23                                                 | 0 | 1          | 1        | 0 | 0         | G0:        |
| 0016529 | Sarcoplasmic_reticulum                             |   |            |          |   |           |            |
| _01     | 6                                                  | 0 | 1          | 1        | 0 | 0         | G0:        |
| 0016538 | Cyclin-dependent_protein_kinase_regulator_activity |   |            |          |   |           |            |
| _01     | 5                                                  | 0 | 1          | 1        | 0 | 0         | G0:        |
| 0016558 | Protein_import_into_peroxisome_matrix              |   |            |          |   |           |            |
| _01     | 210                                                | 1 | 1          | 1        | 0 | 6.3e-05   | G0:        |
| 0016563 | Transcription_activator_activity                   |   |            |          |   |           |            |
| _01     | 151                                                | 1 | 1          | 1        | 0 | 7.4e-05   | G0:        |
| 0016564 | Transcription_repressor_activity                   |   |            |          |   |           |            |
| _01     | 6                                                  | 0 | 1          | 1        | 0 | 0         | G0:        |
| 0016565 | General_transcriptional_repressor_activity         |   |            |          |   |           |            |
| _01     | 61                                                 | 1 | 1          | 1        | 0 | 6.3e-05   | G0:        |
| 0016566 | Specific_transcriptional_repressor_activity        |   |            |          |   |           |            |
| _01     | 64                                                 | 0 | 1          | 1        | 0 | 0         | G0:        |
| 0016567 | Protein_ubiquitination                             |   |            |          |   |           |            |
| _01     | 134                                                | 2 | 0.00593299 | 0.398216 | 0 | 0.0002485 | G0:0016568 |
| 0016568 | Chromatin_modification                             |   |            |          |   |           |            |
| _01     | 8                                                  | 1 | 1          | 1        | 0 | 7.4e-05   | G0:        |
| 0016571 | Histone_methylation                                |   |            |          |   |           |            |
| _01     | 8                                                  | 0 | 1          | 1        | 0 | 0         | G0:        |
| 0016573 | Histone_acetylation                                |   |            |          |   |           |            |
| _01     | 13                                                 | 0 | 1          | 1        | 0 | 0         | G0:        |
| 0016575 | Histone_deacetylation                              |   |            |          |   |           |            |
| _01     | 8                                                  | 0 | 1          | 1        | 0 | 0         | G0:        |
| 0016578 | Histone_deubiquitination                           |   |            |          |   |           |            |
| _01     | 17                                                 | 0 | 1          | 1        | 0 | 0         | G0:        |
| 0016579 | Protein_deubiquitination                           |   |            |          |   |           |            |
| _01     | 5                                                  | 0 | 1          | 1        | 0 | 0         | G0:        |
| 0016580 | Sin3_complex                                       |   |            |          |   |           |            |
| _01     | 8                                                  | 0 | 1          | 1        | 0 | 0         | G0:        |
| 0016581 | NuRD_complex                                       |   |            |          |   |           |            |
| _01     | 5                                                  | 0 | 1          | 1        | 0 | 0         | G0:        |
| 0016585 | Chromatin_remodeling_complex                       |   |            |          |   |           |            |
| _01     | 6                                                  | 0 | 1          | 1        | 0 | 0         | G0:        |
| 0016591 | DNA-directed_RNA_polymerase_II,_holoenzyme         |   |            |          |   |           |            |
| _01     | 24                                                 | 0 | 1          | 1        | 0 | 0         | G0:        |
| 0016592 | Mediator_complex                                   |   |            |          |   |           |            |
| _01     | 7                                                  | 0 | 1          | 1        | 0 | 0         | G0:        |
| 0016594 | Glycine_binding                                    |   |            |          |   |           |            |



|            |                                                                                                                               |   |          |           |   |            |     |
|------------|-------------------------------------------------------------------------------------------------------------------------------|---|----------|-----------|---|------------|-----|
| _01        | 6                                                                                                                             | 0 | 1        | 1         | 0 | 0          | G0: |
| 0016595    | Glutamate_binding                                                                                                             |   |          |           |   |            |     |
| _01        | 10                                                                                                                            | 0 | 1        | 1         | 0 | 0          | G0: |
| 0016597    | Amino_acid_binding                                                                                                            |   |          |           |   |            |     |
| _01        | 6                                                                                                                             | 0 | 1        | 1         | 0 | 0          | G0: |
| 0016601    | Rac_protein_signal_transduction                                                                                               |   |          |           |   |            |     |
| _01        | 11                                                                                                                            | 0 | 1        | 1         | 0 | 0          | G0: |
| 0016604    | Nuclear_body                                                                                                                  |   |          |           |   |            |     |
| _01        | 26                                                                                                                            | 1 | 1        | 1         | 0 | 7.4e-05    | G0: |
| 0016605    | PML_body                                                                                                                      |   |          |           |   |            |     |
| _01        | 85                                                                                                                            | 1 | 1        | 1         | 0 | 0.000423   | G0: |
| 0016607    | Nuclear_speck                                                                                                                 |   |          |           |   |            |     |
| _01        | 6                                                                                                                             | 0 | 1        | 1         | 0 | 0          | G0: |
| 0016616    | Oxidoreductase_activity,_acting_on_the_CH-OH_group_of_donors,_NAD_or_NADP_as_acceptor                                         |   |          |           |   |            |     |
| _01        | 38                                                                                                                            | 2 | 0.000314 | 0.0893319 | 0 | 0.000231   |     |
| G0:0016702 | Oxidoreductase_activity,_acting_on_single_donors_with_incorporation_of_molecular_oxygen,_incorporation_of_two_atoms_of_oxygen |   |          |           |   |            |     |
| _01        | 9                                                                                                                             | 0 | 1        | 1         | 0 | 0          | G0: |
| 0016705    | Oxidoreductase_activity,_acting_on_paired_donors,_with_incorporation_or_reduction_of_molecular_oxygen                         |   |          |           |   |            |     |
| _01        | 711                                                                                                                           | 2 | 0.1261   | 0.836466  | 0 | 0.0002365  |     |
| G0:0016740 | Transferase_activity                                                                                                          |   |          |           |   |            |     |
| _01        | 88                                                                                                                            | 1 | 1        | 1         | 0 | 0.000423   | G0: |
| 0016757    | Transferase_activity,_transferring_glycosyl_groups                                                                            |   |          |           |   |            |     |
| _01        | 12                                                                                                                            | 0 | 1        | 1         | 0 | 0          | G0: |
| 0016758    | Transferase_activity,_transferring_hexosyl_groups                                                                             |   |          |           |   |            |     |
| _01        | 6                                                                                                                             | 0 | 1        | 1         | 0 | 0          | G0: |
| 0016769    | Transferase_activity,_transferring_nitrogenous_groups                                                                         |   |          |           |   |            |     |
| _01        | 15                                                                                                                            | 0 | 1        | 1         | 0 | 0          | G0: |
| 0016773    | Phosphotransferase_activity,_alcohol_group_as_acceptor                                                                        |   |          |           |   |            |     |
| _01        | 45                                                                                                                            | 0 | 1        | 1         | 0 | 0          | G0: |
| 0016779    | Nucleotidyltransferase_activity                                                                                               |   |          |           |   |            |     |
| _01        | 8                                                                                                                             | 0 | 1        | 1         | 0 | 0          | G0: |
| 0016780    | Phosphotransferase_activity,_for_other_substituted_phosphate_groups                                                           |   |          |           |   |            |     |
| _01        | 583                                                                                                                           | 4 | 0.001131 | 0.177593  | 0 | 0.00012625 |     |
| G0:0016787 | Hydrolase_activity                                                                                                            |   |          |           |   |            |     |
| _01        | 13                                                                                                                            | 0 | 1        | 1         | 0 | 0          | G0: |
| 0016788    | Hydrolase_activity,_acting_on_ester_bonds                                                                                     |   |          |           |   |            |     |
| _01        | 5                                                                                                                             | 0 | 1        | 1         | 0 | 0          | G0: |
| 0016790    | Thiolester_hydrolase_activity                                                                                                 |   |          |           |   |            |     |
| _01        | 10                                                                                                                            | 0 | 1        | 1         | 0 | 0          | G0: |
| 0016791    | Phosphatase_activity                                                                                                          |   |          |           |   |            |     |
| _01        | 29                                                                                                                            | 0 | 1        | 1         | 0 | 0          | G0: |
| 0016798    | Hydrolase_activity,_acting_on_glycosyl_bonds                                                                                  |   |          |           |   |            |     |
| _01        | 9                                                                                                                             | 0 | 1        | 1         | 0 | 0          | G0: |
| 0016805    | Dipeptidase_activity                                                                                                          |   |          |           |   |            |     |
| _01        | 9                                                                                                                             | 0 | 1        | 1         | 0 | 0          | G0: |
| 0016810    | Hydrolase_activity,_acting_on_carbon-nitrogen_(but_not_peptide)_bonds                                                         |   |          |           |   |            |     |
| _01        | 12                                                                                                                            | 0 | 1        | 1         | 0 | 0          | G0: |

|         |                                                                                                |   |          |         |   |          |     |
|---------|------------------------------------------------------------------------------------------------|---|----------|---------|---|----------|-----|
| 0016818 | Hydrolase_activity,_acting_on_acid_anhydrides,_in_phosphorus-containing_anhydrides             |   |          |         |   |          |     |
| _01     | 28                                                                                             | 0 | 1        | 1       | 0 | 0        | G0: |
| 0016820 | Hydrolase_activity,_acting_on_acid_anhydrides,_catalyzing_transmembrane_movement_of_substances |   |          |         |   |          |     |
| _01     | 67                                                                                             | 2 | 0.000477 | 0.10964 | 0 | 5.1e-05  | G0: |
| 0016829 | Lyase_activity                                                                                 |   |          |         |   |          |     |
| _01     | 6                                                                                              | 0 | 1        | 1       | 0 | 0        | G0: |
| 0016831 | Carboxy-lyase_activity                                                                         |   |          |         |   |          |     |
| _01     | 65                                                                                             | 0 | 1        | 1       | 0 | 0        | G0: |
| 0016853 | Isomerase_activity                                                                             |   |          |         |   |          |     |
| _01     | 217                                                                                            | 1 | 1        | 1       | 0 | 0.000423 | G0: |
| 0016874 | Ligase_activity                                                                                |   |          |         |   |          |     |
| _01     | 25                                                                                             | 0 | 1        | 1       | 0 | 0        | G0: |
| 0016881 | Acid-amino_acid_ligase_activity                                                                |   |          |         |   |          |     |
| _01     | 81                                                                                             | 0 | 1        | 1       | 0 | 0        | G0: |
| 0016887 | ATPase_activity                                                                                |   |          |         |   |          |     |
| _01     | 5                                                                                              | 0 | 1        | 1       | 0 | 0        | G0: |
| 0016918 | Retinal_binding                                                                                |   |          |         |   |          |     |
| _01     | 6                                                                                              | 0 | 1        | 1       | 0 | 0        | G0: |
| 0016922 | Ligand-dependent_nuclear_receptor_binding                                                      |   |          |         |   |          |     |
| _01     | 5                                                                                              | 0 | 1        | 1       | 0 | 0        | G0: |
| 0016925 | Protein_sumoylation                                                                            |   |          |         |   |          |     |
| _01     | 7                                                                                              | 0 | 1        | 1       | 0 | 0        | G0: |
| 0016944 | RNA_polymerase_II_transcription_elongation_factor_activity                                     |   |          |         |   |          |     |
| _01     | 10                                                                                             | 0 | 1        | 1       | 0 | 0        | G0: |
| 0016998 | Cell_wall_macromolecule_catabolic_process                                                      |   |          |         |   |          |     |
| _01     | 12                                                                                             | 0 | 1        | 1       | 0 | 0        | G0: |
| 0017015 | Regulation_of_transforming_growth_factor_beta_receptor_signaling_pathway                       |   |          |         |   |          |     |
| _01     | 6                                                                                              | 0 | 1        | 1       | 0 | 0        | G0: |
| 0017016 | Ras_GTPase_binding                                                                             |   |          |         |   |          |     |
| _01     | 8                                                                                              | 0 | 1        | 1       | 0 | 0        | G0: |
| 0017017 | MAP_kinase_tyrosine/serine/threonine_phosphatase_activity                                      |   |          |         |   |          |     |
| _01     | 9                                                                                              | 0 | 1        | 1       | 0 | 0        | G0: |
| 0017022 | Myosin_binding                                                                                 |   |          |         |   |          |     |
| _01     | 6                                                                                              | 0 | 1        | 1       | 0 | 0        | G0: |
| 0017025 | TATA-binding_protein_binding                                                                   |   |          |         |   |          |     |
| _01     | 19                                                                                             | 0 | 1        | 1       | 0 | 0        | G0: |
| 0017046 | Peptide_hormone_binding                                                                        |   |          |         |   |          |     |
| _01     | 10                                                                                             | 0 | 1        | 1       | 0 | 0        | G0: |
| 0017048 | Rho_GTPase_binding                                                                             |   |          |         |   |          |     |
| _01     | 7                                                                                              | 0 | 1        | 1       | 0 | 0        | G0: |
| 0017049 | GTP-Rho_binding                                                                                |   |          |         |   |          |     |
| _01     | 22                                                                                             | 0 | 1        | 1       | 0 | 0        | G0: |
| 0017053 | Transcriptional_repressor_complex                                                              |   |          |         |   |          |     |
| _01     | 6                                                                                              | 0 | 1        | 1       | 0 | 0        | G0: |
| 0017075 | Syntaxin-1_binding                                                                             |   |          |         |   |          |     |
| _01     | 5                                                                                              | 0 | 1        | 1       | 0 | 0        | G0: |
| 0017076 | Purine_nucleotide_binding                                                                      |   |          |         |   |          |     |
| _01     | 6                                                                                              | 0 | 1        | 1       | 0 | 0        | G0: |

|         |                                                           |   |   |   |   |       |  |     |
|---------|-----------------------------------------------------------|---|---|---|---|-------|--|-----|
| 0017091 | AU-rich_element_binding                                   |   |   |   |   |       |  |     |
| _01     | 5                                                         | 0 | 1 | 1 | 0 | 0     |  | G0: |
| 0017110 | Nucleoside-diphosphatase_activity                         |   |   |   |   |       |  |     |
| _01     | 37                                                        | 0 | 1 | 1 | 0 | 0     |  | G0: |
| 0017111 | Nucleoside-triphosphatase_activity                        |   |   |   |   |       |  |     |
| _01     | 7                                                         | 0 | 1 | 1 | 0 | 0     |  | G0: |
| 0017119 | Golgi_transport_complex                                   |   |   |   |   |       |  |     |
| _01     | 74                                                        | 0 | 1 | 1 | 0 | 0     |  | G0: |
| 0017124 | SH3_domain_binding                                        |   |   |   |   |       |  |     |
| _01     | 8                                                         | 0 | 1 | 1 | 0 | 0     |  | G0: |
| 0017127 | Cholesterol_transporter_activity                          |   |   |   |   |       |  |     |
| _01     | 10                                                        | 0 | 1 | 1 | 0 | 0     |  | G0: |
| 0017134 | Fibroblast_growth_factor_binding                          |   |   |   |   |       |  |     |
| _01     | 21                                                        | 0 | 1 | 1 | 0 | 0     |  | G0: |
| 0017137 | Rab_GTPase_binding                                        |   |   |   |   |       |  |     |
| _01     | 6                                                         | 0 | 1 | 1 | 0 | 0     |  | G0: |
| 0017144 | Drug_metabolic_process                                    |   |   |   |   |       |  |     |
| _01     | 5                                                         | 0 | 1 | 1 | 0 | 0     |  | G0: |
| 0017146 | N-methyl-D-aspartate_selective_glutamate_receptor_complex |   |   |   |   |       |  |     |
| _01     | 14                                                        | 0 | 1 | 1 | 0 | 0     |  | G0: |
| 0017147 | Wnt-protein_binding                                       |   |   |   |   |       |  |     |
| _01     | 13                                                        | 0 | 1 | 1 | 0 | 0     |  | G0: |
| 0017148 | Negative_regulation_of_translation                        |   |   |   |   |       |  |     |
| _01     | 7                                                         | 0 | 1 | 1 | 0 | 0     |  | G0: |
| 0017153 | Sodium:dicarboxylate_symporter_activity                   |   |   |   |   |       |  |     |
| _01     | 6                                                         | 0 | 1 | 1 | 0 | 0     |  | G0: |
| 0017154 | Semaphorin_receptor_activity                              |   |   |   |   |       |  |     |
| _01     | 6                                                         | 0 | 1 | 1 | 0 | 0     |  | G0: |
| 0017156 | Calcium_ion-dependent_exocytosis                          |   |   |   |   |       |  |     |
| _01     | 9                                                         | 0 | 1 | 1 | 0 | 0     |  | G0: |
| 0017157 | Regulation_of_exocytosis                                  |   |   |   |   |       |  |     |
| _01     | 8                                                         | 1 | 1 | 1 | 0 | 5e-05 |  | G0: |
| 0017158 | Regulation_of_calcium_ion-dependent_exocytosis            |   |   |   |   |       |  |     |
| _01     | 8                                                         | 0 | 1 | 1 | 0 | 0     |  | G0: |
| 0017166 | Vinculin_binding                                          |   |   |   |   |       |  |     |
| _01     | 13                                                        | 0 | 1 | 1 | 0 | 0     |  | G0: |
| 0018024 | Histone-lysine_N-methyltransferase_activity               |   |   |   |   |       |  |     |
| _01     | 21                                                        | 0 | 1 | 1 | 0 | 0     |  | G0: |
| 0018105 | Peptidyl-serine_phosphorylation                           |   |   |   |   |       |  |     |
| _01     | 12                                                        | 0 | 1 | 1 | 0 | 0     |  | G0: |
| 0018107 | Peptidyl-threonine_phosphorylation                        |   |   |   |   |       |  |     |
| _01     | 21                                                        | 0 | 1 | 1 | 0 | 0     |  | G0: |
| 0018108 | Peptidyl-tyrosine_phosphorylation                         |   |   |   |   |       |  |     |
| _01     | 9                                                         | 0 | 1 | 1 | 0 | 0     |  | G0: |
| 0018149 | Peptide_cross-linking                                     |   |   |   |   |       |  |     |
| _01     | 32                                                        | 0 | 1 | 1 | 0 | 0     |  | G0: |
| 0018279 | Protein_N-linked_glycosylation_via_asparagine             |   |   |   |   |       |  |     |
| _01     | 13                                                        | 0 | 1 | 1 | 0 | 0     |  | G0: |
| 0018298 | Protein-chromophore_linkage                               |   |   |   |   |       |  |     |
| _01     | 16                                                        | 0 | 1 | 1 | 0 | 0     |  | G0: |
| 0019001 | Guanyl_nucleotide_binding                                 |   |   |   |   |       |  |     |
| _01     | 16                                                        | 0 | 1 | 1 | 0 | 0     |  | G0: |
| 0019003 | GDP_binding                                               |   |   |   |   |       |  |     |
| _01     | 13                                                        | 0 | 1 | 1 | 0 | 0     |  | G0: |

|         |                                          |   |   |   |   |          |     |  |
|---------|------------------------------------------|---|---|---|---|----------|-----|--|
| 0019005 | SCF_ubiquitin_ligase_complex             |   |   |   |   |          |     |  |
| _01     | 5                                        | 0 | 1 | 1 | 0 | 0        | G0: |  |
| 0019047 | Provirus_integration                     |   |   |   |   |          |     |  |
| _01     | 6                                        | 0 | 1 | 1 | 0 | 0        | G0: |  |
| 0019048 | Virus-host_interaction                   |   |   |   |   |          |     |  |
| _01     | 62                                       | 0 | 1 | 1 | 0 | 0        | G0: |  |
| 0019058 | Viral_infectious_cycle                   |   |   |   |   |          |     |  |
| _01     | 7                                        | 0 | 1 | 1 | 0 | 0        | G0: |  |
| 0019059 | Initiation_of_viral_infection            |   |   |   |   |          |     |  |
| _01     | 6                                        | 0 | 1 | 1 | 0 | 0        | G0: |  |
| 0019079 | Viral_genome_replication                 |   |   |   |   |          |     |  |
| _01     | 59                                       | 0 | 1 | 1 | 0 | 0        | G0: |  |
| 0019083 | Viral_transcription                      |   |   |   |   |          |     |  |
| _01     | 5                                        | 0 | 1 | 1 | 0 | 0        | G0: |  |
| 0019104 | DNA_N-glycosylase_activity               |   |   |   |   |          |     |  |
| _01     | 9                                        | 1 | 1 | 1 | 0 | 0.000339 | G0: |  |
| 0019216 | Regulation_of_lipid_metabolic_process    |   |   |   |   |          |     |  |
| _01     | 35                                       | 0 | 1 | 1 | 0 | 0        | G0: |  |
| 0019221 | Cytokine-mediated_signaling_pathway      |   |   |   |   |          |     |  |
| _01     | 8                                        | 0 | 1 | 1 | 0 | 0        | G0: |  |
| 0019228 | Regulation_of_action_potential_in_neuron |   |   |   |   |          |     |  |
| _01     | 10                                       | 0 | 1 | 1 | 0 | 0        | G0: |  |
| 0019229 | Regulation_of_vasoconstriction           |   |   |   |   |          |     |  |
| _01     | 23                                       | 0 | 1 | 1 | 0 | 0        | G0: |  |
| 0019233 | Sensory_perception_of_pain               |   |   |   |   |          |     |  |
| _01     | 4                                        | 0 | 1 | 1 | 0 | 0        | G0: |  |
| 0019236 | Response_to_pheromone                    |   |   |   |   |          |     |  |
| _01     | 5                                        | 0 | 1 | 1 | 0 | 0        | G0: |  |
| 0019237 | Centromeric_DNA_binding                  |   |   |   |   |          |     |  |
| _01     | 8                                        | 0 | 1 | 1 | 0 | 0        | G0: |  |
| 0019363 | Pyridine_nucleotide_biosynthetic_process |   |   |   |   |          |     |  |
| _01     | 17                                       | 0 | 1 | 1 | 0 | 0        | G0: |  |
| 0019370 | Leukotriene_biosynthetic_process         |   |   |   |   |          |     |  |
| _01     | 7                                        | 0 | 1 | 1 | 0 | 0        | G0: |  |
| 0019430 | Removal_of_superoxide_radicals           |   |   |   |   |          |     |  |
| _01     | 20                                       | 0 | 1 | 1 | 0 | 0        | G0: |  |
| 0019432 | Triglyceride_biosynthetic_process        |   |   |   |   |          |     |  |
| _01     | 13                                       | 0 | 1 | 1 | 0 | 0        | G0: |  |
| 0019433 | Triglyceride_catabolic_process           |   |   |   |   |          |     |  |
| _01     | 5                                        | 0 | 1 | 1 | 0 | 0        | G0: |  |
| 0019439 | Aromatic_compound_catabolic_process      |   |   |   |   |          |     |  |
| _01     | 6                                        | 0 | 1 | 1 | 0 | 0        | G0: |  |
| 0019538 | Protein_metabolic_process                |   |   |   |   |          |     |  |
| _01     | 5                                        | 0 | 1 | 1 | 0 | 0        | G0: |  |
| 0019674 | NAD_metabolic_process                    |   |   |   |   |          |     |  |
| _01     | 64                                       | 1 | 1 | 1 | 0 | 5e-05    | G0: |  |
| 0019717 | Synaptosome                              |   |   |   |   |          |     |  |
| _01     | 25                                       | 0 | 1 | 1 | 0 | 0        | G0: |  |
| 0019722 | Calcium-mediated_signaling               |   |   |   |   |          |     |  |
| _01     | 6                                        | 0 | 1 | 1 | 0 | 0        | G0: |  |
| 0019725 | Cellular_homeostasis                     |   |   |   |   |          |     |  |
| _01     | 6                                        | 0 | 1 | 1 | 0 | 0        | G0: |  |
| 0019752 | Carboxylic_acid_metabolic_process        |   |   |   |   |          |     |  |
| _01     | 5                                        | 0 | 1 | 1 | 0 | 0        | G0: |  |

|         |                                                                   |   |   |   |   |          |     |  |
|---------|-------------------------------------------------------------------|---|---|---|---|----------|-----|--|
| 0019800 | Peptide_cross-linking_via_chondroitin_4-sulfate_glycosaminoglycan |   |   |   |   |          |     |  |
| _01     | 22                                                                | 0 | 1 | 1 | 0 | 0        | G0: |  |
| 0019825 | Oxygen_binding                                                    |   |   |   |   |          |     |  |
| _01     | 10                                                                | 0 | 1 | 1 | 0 | 0        | G0: |  |
| 0019827 | Stem_cell_maintenance                                             |   |   |   |   |          |     |  |
| _01     | 15                                                                | 0 | 1 | 1 | 0 | 0        | G0: |  |
| 0019835 | Cytolysis                                                         |   |   |   |   |          |     |  |
| _01     | 18                                                                | 0 | 1 | 1 | 0 | 0        | G0: |  |
| 0019838 | Growth_factor_binding                                             |   |   |   |   |          |     |  |
| _01     | 6                                                                 | 0 | 1 | 1 | 0 | 0        | G0: |  |
| 0019841 | Retinol_binding                                                   |   |   |   |   |          |     |  |
| _01     | 16                                                                | 1 | 1 | 1 | 0 | 0.000423 | G0: |  |
| 0019843 | RRNA_binding                                                      |   |   |   |   |          |     |  |
| _01     | 12                                                                | 0 | 1 | 1 | 0 | 0        | G0: |  |
| 0019861 | Flagellum                                                         |   |   |   |   |          |     |  |
| _01     | 8                                                                 | 0 | 1 | 1 | 0 | 0        | G0: |  |
| 0019882 | Antigen_processing_and_presentation                               |   |   |   |   |          |     |  |
| _01     | 9                                                                 | 0 | 1 | 1 | 0 | 0        | G0: |  |
| 0019894 | Kinesin_binding                                                   |   |   |   |   |          |     |  |
| _01     | 6                                                                 | 0 | 1 | 1 | 0 | 0        | G0: |  |
| 0019897 | Extrinsic_to_plasma_membrane                                      |   |   |   |   |          |     |  |
| _01     | 18                                                                | 0 | 1 | 1 | 0 | 0        | G0: |  |
| 0019898 | Extrinsic_to_membrane                                             |   |   |   |   |          |     |  |
| _01     | 103                                                               | 1 | 1 | 1 | 0 | 3.9e-05  | G0: |  |
| 0019899 | Enzyme_binding                                                    |   |   |   |   |          |     |  |
| _01     | 20                                                                | 0 | 1 | 1 | 0 | 0        | G0: |  |
| 0019900 | Kinase_binding                                                    |   |   |   |   |          |     |  |
| _01     | 86                                                                | 0 | 1 | 1 | 0 | 0        | G0: |  |
| 0019901 | Protein_kinase_binding                                            |   |   |   |   |          |     |  |
| _01     | 20                                                                | 0 | 1 | 1 | 0 | 0        | G0: |  |
| 0019903 | Protein_phosphatase_binding                                       |   |   |   |   |          |     |  |
| _01     | 80                                                                | 1 | 1 | 1 | 0 | 6.3e-05  | G0: |  |
| 0019904 | Protein_domain_specific_binding                                   |   |   |   |   |          |     |  |
| _01     | 9                                                                 | 0 | 1 | 1 | 0 | 0        | G0: |  |
| 0019905 | Syntaxin_binding                                                  |   |   |   |   |          |     |  |
| _01     | 10                                                                | 0 | 1 | 1 | 0 | 0        | G0: |  |
| 0019915 | Lipid_storage                                                     |   |   |   |   |          |     |  |
| _01     | 7                                                                 | 0 | 1 | 1 | 0 | 0        | G0: |  |
| 0019933 | CAMP-mediated_signaling                                           |   |   |   |   |          |     |  |
| _01     | 10                                                                | 0 | 1 | 1 | 0 | 0        | G0: |  |
| 0019955 | Cytokine_binding                                                  |   |   |   |   |          |     |  |
| _01     | 9                                                                 | 0 | 1 | 1 | 0 | 0        | G0: |  |
| 0019992 | Diacylglycerol_binding                                            |   |   |   |   |          |     |  |
| _01     | 76                                                                | 1 | 1 | 1 | 0 | 3.9e-05  | G0: |  |
| 0020037 | Heme_binding                                                      |   |   |   |   |          |     |  |
| _01     | 6                                                                 | 0 | 1 | 1 | 0 | 0        | G0: |  |
| 0021510 | Spinal_cord_development                                           |   |   |   |   |          |     |  |
| _01     | 6                                                                 | 0 | 1 | 1 | 0 | 0        | G0: |  |
| 0021527 | Spinal_cord_association_neuron_differentiation                    |   |   |   |   |          |     |  |
| _01     | 8                                                                 | 0 | 1 | 1 | 0 | 0        | G0: |  |
| 0021537 | Telencephalon_development                                         |   |   |   |   |          |     |  |
| _01     | 7                                                                 | 0 | 1 | 1 | 0 | 0        | G0: |  |
| 0021549 | Cerebellum_development                                            |   |   |   |   |          |     |  |

|            |                                                       |   |            |   |          |          |          |
|------------|-------------------------------------------------------|---|------------|---|----------|----------|----------|
| _01        | 5                                                     | 0 | 1          | 1 | 0        | 0        | G0:      |
| 0021675    | Nerve_development                                     |   |            |   |          |          |          |
| _01        | 7                                                     | 0 | 1          | 1 | 0        | 0        | G0:      |
| 0021756    | Striatum_development                                  |   |            |   |          |          |          |
| _01        | 14                                                    | 0 | 1          | 1 | 0        | 0        | G0:      |
| 0021766    | Hippocampus_development                               |   |            |   |          |          |          |
| _01        | 5                                                     | 0 | 1          | 1 | 0        | 0        | G0:      |
| 0021772    | Olfactory_bulb_development                            |   |            |   |          |          |          |
| _01        | 10                                                    | 1 | 1          | 1 | 0        | 0.000339 | G0:      |
| 0021904    | Dorsal/ventral_neural_tube_patterning                 |   |            |   |          |          |          |
| _01        | 15                                                    | 0 | 1          | 1 | 0        | 0        | G0:      |
| 0021915    | Neural_tube_development                               |   |            |   |          |          |          |
| _01        | 5                                                     | 0 | 1          | 1 | 0        | 0        | G0:      |
| 0021953    | Central_nervous_system_neuron_differentiation         |   |            |   |          |          |          |
| _01        | 6                                                     | 0 | 1          | 1 | 0        | 0        | G0:      |
| 0021954    | Central_nervous_system_neuron_development             |   |            |   |          |          |          |
| _01        | 11                                                    | 0 | 1          | 1 | 0        | 0        | G0:      |
| 0021983    | Pituitary_gland_development                           |   |            |   |          |          |          |
| _01        | 20                                                    | 0 | 1          | 1 | 0        | 0        | G0:      |
| 0021987    | Cerebral_cortex_development                           |   |            |   |          |          |          |
| _01        | 15                                                    | 0 | 1          | 1 | 0        | 0        | G0:      |
| 0022008    | Neurogenesis                                          |   |            |   |          |          |          |
| _01        | 24                                                    | 0 | 1          | 1 | 0        | 0        | G0:      |
| 0022625    | Cytosolic_large_ribosomal_subunit                     |   |            |   |          |          |          |
| _01        | 27                                                    | 0 | 1          | 1 | 0        | 0        | G0:      |
| 0022627    | Cytosolic_small_ribosomal_subunit                     |   |            |   |          |          |          |
| _01        | 11                                                    | 0 | 1          | 1 | 0        | 0        | G0:      |
| 0022857    | Transmembrane_transporter_activity                    |   |            |   |          |          |          |
| _01        | 9                                                     | 0 | 1          | 1 | 0        | 0        | G0:      |
| 0022891    | Substrate-specific_transmembrane_transporter_activity |   |            |   |          |          |          |
| _01        | 31                                                    | 0 | 1          | 1 | 0        | 0        | G0:      |
| 0022900    | Electron_transport_chain                              |   |            |   |          |          |          |
| _01        | 48                                                    | 0 | 1          | 1 | 0        | 0        | G0:      |
| 0022904    | Respiratory_electron_transport_chain                  |   |            |   |          |          |          |
| _01        | 202                                                   | 0 | 1          | 1 | 0        | 0        | G0:      |
| 0023034    | Intracellular_signaling_pathway                       |   |            |   |          |          |          |
| _01        | 7                                                     | 0 | 1          | 1 | 0        | 0        | G0:      |
| 0030010    | Establishment_of_cell_polarity                        |   |            |   |          |          |          |
| _01        | 13                                                    | 0 | 1          | 1 | 0        | 0        | G0:      |
| 0030016    | Myofibril                                             |   |            |   |          |          |          |
| _01        | 22                                                    | 0 | 1          | 1 | 0        | 0        | G0:      |
| 0030017    | Sarcomere                                             |   |            |   |          |          |          |
| _01        | 36                                                    | 0 | 1          | 1 | 0        | 0        | G0:      |
| 0030018    | Z_disc                                                |   |            |   |          |          |          |
| _01        | 50                                                    | 0 | 1          | 1 | 0        | 0        | G0:      |
| 0030027    | Lamellipodium                                         |   |            |   |          |          |          |
| _01        | 25                                                    | 0 | 1          | 1 | 0        | 0        | G0:      |
| 0030030    | Cell_projection_organization                          |   |            |   |          |          |          |
| _01        | 5                                                     | 0 | 1          | 1 | 0        | 0        | G0:      |
| 0030031    | Cell_projection_assembly                              |   |            |   |          |          |          |
| _01        | 11                                                    | 0 | 1          | 1 | 0        | 0        | G0:      |
| 0030032    | Lamellipodium_assembly                                |   |            |   |          |          |          |
| _01        | 80                                                    | 2 | 0.00546999 |   | 0.382459 | 0        | 5.95e-05 |
| G0:0030036 | Actin_cytoskeleton_organization                       |   |            |   |          |          |          |

|            |                                                     |   |             |   |          |   |          |
|------------|-----------------------------------------------------|---|-------------|---|----------|---|----------|
| _01        | 7                                                   | 0 | 1           | 1 | 0        | 0 | G0:      |
| 0030041    | Actin_filament_polymerization                       |   |             |   |          |   | G0:      |
| _01        | 8                                                   | 0 | 1           | 1 | 0        | 0 | G0:      |
| 0030048    | Actin_filament-based_movement                       |   |             |   |          |   | G0:      |
| _01        | 31                                                  | 0 | 1           | 1 | 0        | 0 | G0:      |
| 0030049    | Muscle_filament_sliding                             |   |             |   |          |   | G0:      |
| _01        | 299                                                 | 2 | 0.0549819   |   | 0.710953 | 0 | 4.55e-05 |
| G0:0030054 | Cell_junction                                       |   |             |   |          |   | G0:      |
| _01        | 17                                                  | 0 | 1           | 1 | 0        | 0 | G0:      |
| 0030057    | Desmosome                                           |   |             |   |          |   | G0:      |
| _01        | 7                                                   | 0 | 1           | 1 | 0        | 0 | G0:      |
| 0030071    | Regulation_of_mitotic_metaphase/anaphase_transition |   |             |   |          |   | G0:      |
| _01        | 18                                                  | 0 | 1           | 1 | 0        | 0 | G0:      |
| 0030073    | Insulin_secretion                                   |   |             |   |          |   | G0:      |
| _01        | 39                                                  | 2 | 0.000805999 |   | 0.146665 | 0 |          |
| 0.0005335  | G0:0030097 Hemopoiesis                              |   |             |   |          |   | G0:      |
| _01        | 10                                                  | 0 | 1           | 1 | 0        | 0 | G0:      |
| 0030099    | Myeloid_cell_differentiation                        |   |             |   |          |   | G0:      |
| _01        | 13                                                  | 0 | 1           | 1 | 0        | 0 | G0:      |
| 0030100    | Regulation_of_endocytosis                           |   |             |   |          |   | G0:      |
| _01        | 7                                                   | 0 | 1           | 1 | 0        | 0 | G0:      |
| 0030101    | Natural_killer_cell_activation                      |   |             |   |          |   | G0:      |
| _01        | 8                                                   | 0 | 1           | 1 | 0        | 0 | G0:      |
| 0030111    | Regulation_of_Wnt_receptor_signaling_pathway        |   |             |   |          |   | G0:      |
| _01        | 17                                                  | 0 | 1           | 1 | 0        | 0 | G0:      |
| 0030117    | Membrane_coat                                       |   |             |   |          |   | G0:      |
| _01        | 5                                                   | 0 | 1           | 1 | 0        | 0 | G0:      |
| 0030121    | AP-1_adaptor_complex                                |   |             |   |          |   | G0:      |
| _01        | 6                                                   | 0 | 1           | 1 | 0        | 0 | G0:      |
| 0030122    | AP-2_adaptor_complex                                |   |             |   |          |   | G0:      |
| _01        | 7                                                   | 0 | 1           | 1 | 0        | 0 | G0:      |
| 0030126    | COPI_vesicle_coat                                   |   |             |   |          |   | G0:      |
| _01        | 6                                                   | 0 | 1           | 1 | 0        | 0 | G0:      |
| 0030130    | Clathrin_coat_of_trans-Golgi_network_vesicle        |   |             |   |          |   | G0:      |
| _01        | 15                                                  | 0 | 1           | 1 | 0        | 0 | G0:      |
| 0030131    | Clathrin_adaptor_complex                            |   |             |   |          |   | G0:      |
| _01        | 27                                                  | 0 | 1           | 1 | 0        | 0 | G0:      |
| 0030133    | Transport_vesicle                                   |   |             |   |          |   | G0:      |
| _01        | 23                                                  | 0 | 1           | 1 | 0        | 0 | G0:      |
| 0030136    | Clathrin-coated_vesicle                             |   |             |   |          |   | G0:      |
| _01        | 19                                                  | 0 | 1           | 1 | 0        | 0 | G0:      |
| 0030139    | Endocytic_vesicle                                   |   |             |   |          |   | G0:      |
| _01        | 7                                                   | 0 | 1           | 1 | 0        | 0 | G0:      |
| 0030140    | Trans-Golgi_network_transport_vesicle               |   |             |   |          |   | G0:      |
| _01        | 41                                                  | 0 | 1           | 1 | 0        | 0 | G0:      |
| 0030141    | Stored_secretory_granule                            |   |             |   |          |   | G0:      |
| _01        | 26                                                  | 0 | 1           | 1 | 0        | 0 | G0:      |
| 0030145    | Manganese_ion_binding                               |   |             |   |          |   | G0:      |
| _01        | 6                                                   | 0 | 1           | 1 | 0        | 0 | G0:      |
| 0030146    | Diuresis                                            |   |             |   |          |   | G0:      |
| _01        | 5                                                   | 0 | 1           | 1 | 0        | 0 | G0:      |
| 0030147    | Natriuresis                                         |   |             |   |          |   | G0:      |
| _01        | 6                                                   | 0 | 1           | 1 | 0        | 0 | G0:      |
| 0030148    | Sphingolipid_biosynthetic_process                   |   |             |   |          |   | G0:      |

|         |                                                       |   |             |          |   |             |            |
|---------|-------------------------------------------------------|---|-------------|----------|---|-------------|------------|
| _01     | 319                                                   | 2 | 0.030068    | 0.638468 | 0 | 6.65e-05    | G0:        |
| 0030154 | Cell_differentiation                                  |   |             |          |   |             |            |
| _01     | 16                                                    | 0 | 1           | 1        | 0 | 0           | G0:        |
| 0030155 | Regulation_of_cell_adhesion                           |   |             |          |   |             |            |
| _01     | 9                                                     | 0 | 1           | 1        | 0 | 0           | G0:        |
| 0030159 | Receptor_signaling_complex_scaffold_activity          |   |             |          |   |             |            |
| _01     | 7                                                     | 0 | 1           | 1        | 0 | 0           | G0:        |
| 0030162 | Regulation_of_proteolysis                             |   |             |          |   |             |            |
| _01     | 21                                                    | 0 | 1           | 1        | 0 | 0           | G0:        |
| 0030163 | Protein_catabolic_process                             |   |             |          |   |             |            |
| _01     | 34                                                    | 0 | 1           | 1        | 0 | 0           | G0:        |
| 0030165 | PDZ_domain_binding                                    |   |             |          |   |             |            |
| _01     | 8                                                     | 0 | 1           | 1        | 0 | 0           | G0:        |
| 0030166 | Proteoglycan_biosynthetic_process                     |   |             |          |   |             |            |
| _01     | 157                                                   | 3 | 0.000547999 | 0.119056 | 0 | 0.000270667 | G0:0030168 |
| 0030168 | Platelet_activation                                   |   |             |          |   |             |            |
| _01     | 10                                                    | 0 | 1           | 1        | 0 | 0           | G0:        |
| 0030169 | Low-density_lipoprotein_binding                       |   |             |          |   |             |            |
| _01     | 32                                                    | 0 | 1           | 1        | 0 | 0           | G0:        |
| 0030170 | Pyridoxal_phosphate_binding                           |   |             |          |   |             |            |
| _01     | 33                                                    | 0 | 1           | 1        | 0 | 0           | G0:        |
| 0030173 | Integral_to_Golgi_membrane                            |   |             |          |   |             |            |
| _01     | 17                                                    | 0 | 1           | 1        | 0 | 0           | G0:        |
| 0030175 | Filopodium                                            |   |             |          |   |             |            |
| _01     | 37                                                    | 0 | 1           | 1        | 0 | 0           | G0:        |
| 0030176 | Integral_to_endoplasmic_reticulum_membrane            |   |             |          |   |             |            |
| _01     | 7                                                     | 0 | 1           | 1        | 0 | 0           | G0:        |
| 0030177 | Positive_regulation_of_Wnt_receptor_signaling_pathway |   |             |          |   |             |            |
| _01     | 24                                                    | 1 | 1           | 1        | 0 | 0.000339    | G0:        |
| 0030178 | Negative_regulation_of_Wnt_receptor_signaling_pathway |   |             |          |   |             |            |
| _01     | 46                                                    | 0 | 1           | 1        | 0 | 0           | G0:        |
| 0030182 | Neuron_differentiation                                |   |             |          |   |             |            |
| _01     | 19                                                    | 0 | 1           | 1        | 0 | 0           | G0:        |
| 0030183 | B_cell_differentiation                                |   |             |          |   |             |            |
| _01     | 6                                                     | 0 | 1           | 1        | 0 | 0           | G0:        |
| 0030193 | Regulation_of_blood_coagulation                       |   |             |          |   |             |            |
| _01     | 7                                                     | 0 | 1           | 1        | 0 | 0           | G0:        |
| 0030195 | Negative_regulation_of_blood_coagulation              |   |             |          |   |             |            |
| _01     | 41                                                    | 0 | 1           | 1        | 0 | 0           | G0:        |
| 0030198 | Extracellular_matrix_organization                     |   |             |          |   |             |            |
| _01     | 18                                                    | 0 | 1           | 1        | 0 | 0           | G0:        |
| 0030199 | Collagen_fibril_organization                          |   |             |          |   |             |            |
| _01     | 6                                                     | 0 | 1           | 1        | 0 | 0           | G0:        |
| 0030206 | Chondroitin_sulfate_biosynthetic_process              |   |             |          |   |             |            |
| _01     | 24                                                    | 0 | 1           | 1        | 0 | 0           | G0:        |
| 0030216 | Keratinocyte_differentiation                          |   |             |          |   |             |            |
| _01     | 11                                                    | 0 | 1           | 1        | 0 | 0           | G0:        |
| 0030217 | T_cell_differentiation                                |   |             |          |   |             |            |
| _01     | 13                                                    | 0 | 1           | 1        | 0 | 0           | G0:        |
| 0030218 | Erythrocyte_differentiation                           |   |             |          |   |             |            |
| _01     | 7                                                     | 0 | 1           | 1        | 0 | 0           | G0:        |
| 0030225 | Macrophage_differentiation                            |   |             |          |   |             |            |
| _01     | 8                                                     | 0 | 1           | 1        | 0 | 0           | G0:        |
| 0030234 | Enzyme_regulator_activity                             |   |             |          |   |             |            |



|         |                                                                |   |   |   |   |         |     |
|---------|----------------------------------------------------------------|---|---|---|---|---------|-----|
| _01     | 6                                                              | 0 | 1 | 1 | 0 | 0       | G0: |
| 0030235 | Nitric-oxide_synthase_regulator_activity                       |   |   |   |   |         | G0: |
| _01     | 18                                                             | 0 | 1 | 1 | 0 | 0       | G0: |
| 0030246 | Carbohydrate_binding                                           |   |   |   |   |         | G0: |
| _01     | 8                                                              | 0 | 1 | 1 | 0 | 0       | G0: |
| 0030247 | Polysaccharide_binding                                         |   |   |   |   |         | G0: |
| _01     | 5                                                              | 0 | 1 | 1 | 0 | 0       | G0: |
| 0030252 | Growth_hormone_secretion                                       |   |   |   |   |         | G0: |
| _01     | 8                                                              | 0 | 1 | 1 | 0 | 0       | G0: |
| 0030261 | Chromosome_condensation                                        |   |   |   |   |         | G0: |
| _01     | 5                                                              | 0 | 1 | 1 | 0 | 0       | G0: |
| 0030274 | LIM_domain_binding                                             |   |   |   |   |         | G0: |
| _01     | 7                                                              | 0 | 1 | 1 | 0 | 0       | G0: |
| 0030276 | Clathrin_binding                                               |   |   |   |   |         | G0: |
| _01     | 5                                                              | 0 | 1 | 1 | 0 | 0       | G0: |
| 0030278 | Regulation_of_ossification                                     |   |   |   |   |         | G0: |
| _01     | 10                                                             | 0 | 1 | 1 | 0 | 0       | G0: |
| 0030279 | Negative_regulation_of_ossification                            |   |   |   |   |         | G0: |
| _01     | 6                                                              | 0 | 1 | 1 | 0 | 0       | G0: |
| 0030280 | Structural_constituent_of_epidermis                            |   |   |   |   |         | G0: |
| _01     | 15                                                             | 1 | 1 | 1 | 0 | 3.9e-05 | G0: |
| 0030282 | Bone_mineralization                                            |   |   |   |   |         | G0: |
| _01     | 10                                                             | 0 | 1 | 1 | 0 | 0       | G0: |
| 0030286 | Dynein_complex                                                 |   |   |   |   |         | G0: |
| _01     | 7                                                              | 0 | 1 | 1 | 0 | 0       | G0: |
| 0030288 | Outer_membrane-bounded_periplasmic_space                       |   |   |   |   |         | G0: |
| _01     | 5                                                              | 0 | 1 | 1 | 0 | 0       | G0: |
| 0030295 | Protein_kinase_activator_activity                              |   |   |   |   |         | G0: |
| _01     | 8                                                              | 0 | 1 | 1 | 0 | 0       | G0: |
| 0030301 | Cholesterol_transport                                          |   |   |   |   |         | G0: |
| _01     | 28                                                             | 0 | 1 | 1 | 0 | 0       | G0: |
| 0030307 | Positive_regulation_of_cell_growth                             |   |   |   |   |         | G0: |
| _01     | 66                                                             | 0 | 1 | 1 | 0 | 0       | G0: |
| 0030308 | Negative_regulation_of_cell_growth                             |   |   |   |   |         | G0: |
| _01     | 14                                                             | 0 | 1 | 1 | 0 | 0       | G0: |
| 0030315 | T-tubule                                                       |   |   |   |   |         | G0: |
| _01     | 8                                                              | 0 | 1 | 1 | 0 | 0       | G0: |
| 0030316 | Osteoclast_differentiation                                     |   |   |   |   |         | G0: |
| _01     | 10                                                             | 0 | 1 | 1 | 0 | 0       | G0: |
| 0030317 | Sperm_motility                                                 |   |   |   |   |         | G0: |
| _01     | 7                                                              | 0 | 1 | 1 | 0 | 0       | G0: |
| 0030318 | Melanocyte_differentiation                                     |   |   |   |   |         | G0: |
| _01     | 47                                                             | 1 | 1 | 1 | 0 | 6.3e-05 | G0: |
| 0030324 | Lung_development                                               |   |   |   |   |         | G0: |
| _01     | 13                                                             | 0 | 1 | 1 | 0 | 0       | G0: |
| 0030325 | Adrenal_gland_development                                      |   |   |   |   |         | G0: |
| _01     | 27                                                             | 0 | 1 | 1 | 0 | 0       | G0: |
| 0030326 | Embryonic_limb_morphogenesis                                   |   |   |   |   |         | G0: |
| _01     | 6                                                              | 0 | 1 | 1 | 0 | 0       | G0: |
| 0030330 | DNA_damage_response,_signal_transduction_by_p53_class_mediator |   |   |   |   |         | G0: |
| _01     | 10                                                             | 0 | 1 | 1 | 0 | 0       | G0: |
| 0030331 | Estrogen_receptor_binding                                      |   |   |   |   |         | G0: |
| _01     | 7                                                              | 0 | 1 | 1 | 0 | 0       | G0: |

|         |                                                                                   |   |   |   |   |          |     |  |
|---------|-----------------------------------------------------------------------------------|---|---|---|---|----------|-----|--|
| 0030332 | Cyclin_binding                                                                    |   |   |   |   |          |     |  |
| _01     | 22                                                                                | 0 | 1 | 1 | 0 | 0        | G0: |  |
| 0030334 | Regulation_of_cell_migration                                                      |   |   |   |   |          |     |  |
| _01     | 52                                                                                | 0 | 1 | 1 | 0 | 0        | G0: |  |
| 0030335 | Positive_regulation_of_cell_migration                                             |   |   |   |   |          |     |  |
| _01     | 33                                                                                | 0 | 1 | 1 | 0 | 0        | G0: |  |
| 0030336 | Negative_regulation_of_cell_migration                                             |   |   |   |   |          |     |  |
| _01     | 20                                                                                | 0 | 1 | 1 | 0 | 0        | G0: |  |
| 0030374 | Ligand-dependent_nuclear_receptor_transcription_coactivator_activity              |   |   |   |   |          |     |  |
| _01     | 8                                                                                 | 0 | 1 | 1 | 0 | 0        | G0: |  |
| 0030384 | Phosphoinositide_metabolic_process                                                |   |   |   |   |          |     |  |
| _01     | 56                                                                                | 1 | 1 | 1 | 0 | 0.000339 | G0: |  |
| 0030414 | Peptidase_inhibitor_activity                                                      |   |   |   |   |          |     |  |
| _01     | 89                                                                                | 0 | 1 | 1 | 0 | 0        | G0: |  |
| 0030424 | Axon                                                                              |   |   |   |   |          |     |  |
| _01     | 91                                                                                | 0 | 1 | 1 | 0 | 0        | G0: |  |
| 0030425 | Dendrite                                                                          |   |   |   |   |          |     |  |
| _01     | 45                                                                                | 0 | 1 | 1 | 0 | 0        | G0: |  |
| 0030426 | Growth_cone                                                                       |   |   |   |   |          |     |  |
| _01     | 9                                                                                 | 0 | 1 | 1 | 0 | 0        | G0: |  |
| 0030431 | Sleep                                                                             |   |   |   |   |          |     |  |
| _01     | 6                                                                                 | 0 | 1 | 1 | 0 | 0        | G0: |  |
| 0030432 | Peristalsis                                                                       |   |   |   |   |          |     |  |
| _01     | 19                                                                                | 0 | 1 | 1 | 0 | 0        | G0: |  |
| 0030433 | ER-associated_protein_catabolic_process                                           |   |   |   |   |          |     |  |
| _01     | 26                                                                                | 0 | 1 | 1 | 0 | 0        | G0: |  |
| 0030496 | Midbody                                                                           |   |   |   |   |          |     |  |
| _01     | 5                                                                                 | 0 | 1 | 1 | 0 | 0        | G0: |  |
| 0030500 | Regulation_of_bone_mineralization                                                 |   |   |   |   |          |     |  |
| _01     | 14                                                                                | 0 | 1 | 1 | 0 | 0        | G0: |  |
| 0030501 | Positive_regulation_of_bone_mineralization                                        |   |   |   |   |          |     |  |
| _01     | 6                                                                                 | 0 | 1 | 1 | 0 | 0        | G0: |  |
| 0030506 | Ankyrin_binding                                                                   |   |   |   |   |          |     |  |
| _01     | 7                                                                                 | 1 | 1 | 1 | 0 | 6.9e-05  | G0: |  |
| 0030507 | Spectrin_binding                                                                  |   |   |   |   |          |     |  |
| _01     | 28                                                                                | 0 | 1 | 1 | 0 | 0        | G0: |  |
| 0030509 | BMP_signaling_pathway                                                             |   |   |   |   |          |     |  |
| _01     | 10                                                                                | 0 | 1 | 1 | 0 | 0        | G0: |  |
| 0030511 | Positive_regulation_of_transforming_growth_factor_beta_receptor_signaling_pathway |   |   |   |   |          |     |  |
| _01     | 20                                                                                | 0 | 1 | 1 | 0 | 0        | G0: |  |
| 0030512 | Negative_regulation_of_transforming_growth_factor_beta_receptor_signaling_pathway |   |   |   |   |          |     |  |
| _01     | 13                                                                                | 0 | 1 | 1 | 0 | 0        | G0: |  |
| 0030514 | Negative_regulation_of_BMP_signaling_pathway                                      |   |   |   |   |          |     |  |
| _01     | 5                                                                                 | 0 | 1 | 1 | 0 | 0        | G0: |  |
| 0030515 | SnoRNA_binding                                                                    |   |   |   |   |          |     |  |
| _01     | 6                                                                                 | 0 | 1 | 1 | 0 | 0        | G0: |  |
| 0030518 | Steroid_hormone_receptor_signaling_pathway                                        |   |   |   |   |          |     |  |
| _01     | 12                                                                                | 0 | 1 | 1 | 0 | 0        | G0: |  |
| 0030520 | Estrogen_receptor_signaling_pathway                                               |   |   |   |   |          |     |  |

|         |                                                      |   |          |          |   |          |     |
|---------|------------------------------------------------------|---|----------|----------|---|----------|-----|
| _01     | 22                                                   | 0 | 1        | 1        | 0 | 0        | G0: |
| 0030521 | Androgen_receptor_signaling_pathway                  |   |          |          |   |          |     |
| _01     | 192                                                  | 2 | 0.004723 | 0.359966 | 0 | 0.000204 | G0: |
| 0030528 | Transcription_regulator_activity                     |   |          |          |   |          |     |
| _01     | 71                                                   | 1 | 1        | 1        | 0 | 5.2e-05  | G0: |
| 0030529 | Ribonucleoprotein_complex                            |   |          |          |   |          |     |
| _01     | 11                                                   | 0 | 1        | 1        | 0 | 0        | G0: |
| 0030530 | Heterogeneous_nuclear_ribonucleoprotein_complex      |   |          |          |   |          |     |
| _01     | 11                                                   | 0 | 1        | 1        | 0 | 0        | G0: |
| 0030532 | Small_nuclear_ribonucleoprotein_complex              |   |          |          |   |          |     |
| _01     | 13                                                   | 0 | 1        | 1        | 0 | 0        | G0: |
| 0030539 | Male_genitalia_development                           |   |          |          |   |          |     |
| _01     | 7                                                    | 0 | 1        | 1        | 0 | 0        | G0: |
| 0030552 | CAMP_binding                                         |   |          |          |   |          |     |
| _01     | 19                                                   | 1 | 1        | 1        | 0 | 8.3e-05  | G0: |
| 0030574 | Collagen_catabolic_process                           |   |          |          |   |          |     |
| _01     | 14                                                   | 0 | 1        | 1        | 0 | 0        | G0: |
| 0030593 | Neutrophil_chemotaxis                                |   |          |          |   |          |     |
| _01     | 6                                                    | 0 | 1        | 1        | 0 | 0        | G0: |
| 0030595 | Leukocyte_chemotaxis                                 |   |          |          |   |          |     |
| _01     | 7                                                    | 0 | 1        | 1        | 0 | 0        | G0: |
| 0030658 | Transport_vesicle_membrane                           |   |          |          |   |          |     |
| _01     | 47                                                   | 1 | 1        | 1        | 0 | 5e-05    | G0: |
| 0030659 | Cytoplasmic_vesicle_membrane                         |   |          |          |   |          |     |
| _01     | 5                                                    | 0 | 1        | 1        | 0 | 0        | G0: |
| 0030660 | Golgi-associated_vesicle_membrane                    |   |          |          |   |          |     |
| _01     | 9                                                    | 0 | 1        | 1        | 0 | 0        | G0: |
| 0030665 | Clathrin_coated_vesicle_membrane                     |   |          |          |   |          |     |
| _01     | 17                                                   | 0 | 1        | 1        | 0 | 0        | G0: |
| 0030666 | Endocytic_vesicle_membrane                           |   |          |          |   |          |     |
| _01     | 8                                                    | 0 | 1        | 1        | 0 | 0        | G0: |
| 0030667 | Secretory_granule_membrane                           |   |          |          |   |          |     |
| _01     | 32                                                   | 1 | 1        | 1        | 0 | 5e-05    | G0: |
| 0030672 | Synaptic_vesicle_membrane                            |   |          |          |   |          |     |
| _01     | 5                                                    | 0 | 1        | 1        | 0 | 0        | G0: |
| 0030673 | Axolemma                                             |   |          |          |   |          |     |
| _01     | 38                                                   | 0 | 1        | 1        | 0 | 0        | G0: |
| 0030674 | Protein_binding,_bridging                            |   |          |          |   |          |     |
| _01     | 6                                                    | 0 | 1        | 1        | 0 | 0        | G0: |
| 0030675 | Rac_GTPase_activator_activity                        |   |          |          |   |          |     |
| _01     | 5                                                    | 1 | 1        | 1        | 0 | 3.9e-05  | G0: |
| 0030728 | Ovulation                                            |   |          |          |   |          |     |
| _01     | 9                                                    | 0 | 1        | 1        | 0 | 0        | G0: |
| 0030742 | GTP-dependent_protein_binding                        |   |          |          |   |          |     |
| _01     | 5                                                    | 0 | 1        | 1        | 0 | 0        | G0: |
| 0030818 | Negative_regulation_of_cAMP_biosynthetic_process     |   |          |          |   |          |     |
| _01     | 21                                                   | 0 | 1        | 1        | 0 | 0        | G0: |
| 0030819 | Positive_regulation_of_cAMP_biosynthetic_process     |   |          |          |   |          |     |
| _01     | 5                                                    | 0 | 1        | 1        | 0 | 0        | G0: |
| 0030828 | Positive_regulation_of_cGMP_biosynthetic_process     |   |          |          |   |          |     |
| _01     | 5                                                    | 0 | 1        | 1        | 0 | 0        | G0: |
| 0030833 | Regulation_of_actin_filament_polymerization          |   |          |          |   |          |     |
| _01     | 8                                                    | 0 | 1        | 1        | 0 | 0        | G0: |
| 0030838 | Positive_regulation_of_actin_filament_polymerization |   |          |          |   |          |     |

|         |                                                                                          |   |   |   |   |          |     |
|---------|------------------------------------------------------------------------------------------|---|---|---|---|----------|-----|
| _01     | 30                                                                                       | 0 | 1 | 1 | 0 | 0        | G0: |
| 0030855 | Epithelial_cell_differentiation                                                          |   |   |   |   |          |     |
| _01     | 5                                                                                        | 0 | 1 | 1 | 0 | 0        | G0: |
| 0030856 | Regulation_of_epithelial_cell_differentiation                                            |   |   |   |   |          |     |
| _01     | 13                                                                                       | 0 | 1 | 1 | 0 | 0        | G0: |
| 0030863 | Cortical_cytoskeleton                                                                    |   |   |   |   |          |     |
| _01     | 6                                                                                        | 0 | 1 | 1 | 0 | 0        | G0: |
| 0030864 | Cortical_actin_cytoskeleton                                                              |   |   |   |   |          |     |
| _01     | 11                                                                                       | 0 | 1 | 1 | 0 | 0        | G0: |
| 0030866 | Cortical_actin_cytoskeleton_organization                                                 |   |   |   |   |          |     |
| _01     | 5                                                                                        | 0 | 1 | 1 | 0 | 0        | G0: |
| 0030867 | Rough_endoplasmic_reticulum_membrane                                                     |   |   |   |   |          |     |
| _01     | 4                                                                                        | 0 | 1 | 1 | 0 | 0        | G0: |
| 0030868 | Smooth_endoplasmic_reticulum_membrane                                                    |   |   |   |   |          |     |
| _01     | 11                                                                                       | 0 | 1 | 1 | 0 | 0        | G0: |
| 0030878 | Thyroid_gland_development                                                                |   |   |   |   |          |     |
| _01     | 21                                                                                       | 1 | 1 | 1 | 0 | 5.2e-05  | G0: |
| 0030879 | Mammary_gland_development                                                                |   |   |   |   |          |     |
| _01     | 6                                                                                        | 0 | 1 | 1 | 0 | 0        | G0: |
| 0030889 | Negative_regulation_of_B_cell_proliferation                                              |   |   |   |   |          |     |
| _01     | 21                                                                                       | 0 | 1 | 1 | 0 | 0        | G0: |
| 0030890 | Positive_regulation_of_B_cell_proliferation                                              |   |   |   |   |          |     |
| _01     | 8                                                                                        | 0 | 1 | 1 | 0 | 0        | G0: |
| 0030897 | HOPS_complex                                                                             |   |   |   |   |          |     |
| _01     | 7                                                                                        | 0 | 1 | 1 | 0 | 0        | G0: |
| 0030898 | Actin-dependent_ATPase_activity                                                          |   |   |   |   |          |     |
| _01     | 36                                                                                       | 1 | 1 | 1 | 0 | 0.000339 | G0: |
| 0030900 | Forebrain_development                                                                    |   |   |   |   |          |     |
| _01     | 16                                                                                       | 0 | 1 | 1 | 0 | 0        | G0: |
| 0030901 | Midbrain_development                                                                     |   |   |   |   |          |     |
| _01     | 12                                                                                       | 0 | 1 | 1 | 0 | 0        | G0: |
| 0030902 | Hindbrain_development                                                                    |   |   |   |   |          |     |
| _01     | 9                                                                                        | 0 | 1 | 1 | 0 | 0        | G0: |
| 0030914 | STAGA_complex                                                                            |   |   |   |   |          |     |
| _01     | 10                                                                                       | 0 | 1 | 1 | 0 | 0        | G0: |
| 0030949 | Positive_regulation_of_vascular_endothelial_growth_factor_receptor_s<br>ignaling_pathway |   |   |   |   |          |     |
| _01     | 16                                                                                       | 0 | 1 | 1 | 0 | 0        | G0: |
| 0030968 | Endoplasmic_reticulum_unfolded_protein_response                                          |   |   |   |   |          |     |
| _01     | 5                                                                                        | 0 | 1 | 1 | 0 | 0        | G0: |
| 0030970 | Retrograde_protein_transport,_ER_to_cytosol                                              |   |   |   |   |          |     |
| _01     | 7                                                                                        | 1 | 1 | 1 | 0 | 5.2e-05  | G0: |
| 0030971 | Receptor_tyrosine_kinase_binding                                                         |   |   |   |   |          |     |
| _01     | 5                                                                                        | 0 | 1 | 1 | 0 | 0        | G0: |
| 0030983 | Mismatched_DNA_binding                                                                   |   |   |   |   |          |     |
| _01     | 6                                                                                        | 0 | 1 | 1 | 0 | 0        | G0: |
| 0031000 | Response_to_caffeine                                                                     |   |   |   |   |          |     |
| _01     | 83                                                                                       | 0 | 1 | 1 | 0 | 0        | G0: |
| 0031012 | Extracellular_matrix                                                                     |   |   |   |   |          |     |
| _01     | 5                                                                                        | 0 | 1 | 1 | 0 | 0        | G0: |
| 0031013 | Troponin_I_binding                                                                       |   |   |   |   |          |     |
| _01     | 14                                                                                       | 0 | 1 | 1 | 0 | 0        | G0: |
| 0031016 | Pancreas_development                                                                     |   |   |   |   |          |     |

|           |                                                                                                |   |             |          |   |          |     |
|-----------|------------------------------------------------------------------------------------------------|---|-------------|----------|---|----------|-----|
| _01       | 82                                                                                             | 0 | 1           | 1        | 0 | 0        | G0: |
| 0031018   | Endocrine_pancreas_development                                                                 |   |             |          |   |          | G0: |
| _01       | 22                                                                                             | 0 | 1           | 1        | 0 | 0        | G0: |
| 0031047   | Gene_silencing_by_RNA                                                                          |   |             |          |   |          | G0: |
| _01       | 5                                                                                              | 0 | 1           | 1        | 0 | 0        | G0: |
| 0031054   | Pre-microRNA_processing                                                                        |   |             |          |   |          | G0: |
| _01       | 12                                                                                             | 0 | 1           | 1        | 0 | 0        | G0: |
| 0031069   | Hair_follicle_morphogenesis                                                                    |   |             |          |   |          | G0: |
| _01       | 39                                                                                             | 0 | 1           | 1        | 0 | 0        | G0: |
| 0031072   | Heat_shock_protein_binding                                                                     |   |             |          |   |          | G0: |
| _01       | 6                                                                                              | 0 | 1           | 1        | 0 | 0        | G0: |
| 0031080   | Nup107-160_complex                                                                             |   |             |          |   |          | G0: |
| _01       | 6                                                                                              | 0 | 1           | 1        | 0 | 0        | G0: |
| 0031091   | Platelet_alpha_granule                                                                         |   |             |          |   |          | G0: |
| _01       | 8                                                                                              | 0 | 1           | 1        | 0 | 0        | G0: |
| 0031092   | Platelet_alpha_granule_membrane                                                                |   |             |          |   |          | G0: |
| _01       | 26                                                                                             | 2 | 8.49999e-05 | 0.034596 | 0 | 0        | G0: |
| 0.0001945 | G0:0031093 Platelet_alpha_granule_lumen                                                        |   |             |          |   |          | G0: |
| _01       | 7                                                                                              | 0 | 1           | 1        | 0 | 0        | G0: |
| 0031095   | Platelet_dense_tubular_network_membrane                                                        |   |             |          |   |          | G0: |
| _01       | 31                                                                                             | 0 | 1           | 1        | 0 | 0        | G0: |
| 0031100   | Organ_regeneration                                                                             |   |             |          |   |          | G0: |
| _01       | 6                                                                                              | 0 | 1           | 1        | 0 | 0        | G0: |
| 0031103   | Axon_regeneration                                                                              |   |             |          |   |          | G0: |
| _01       | 6                                                                                              | 0 | 1           | 1        | 0 | 0        | G0: |
| 0031105   | Septin_complex                                                                                 |   |             |          |   |          | G0: |
| _01       | 6                                                                                              | 0 | 1           | 1        | 0 | 0        | G0: |
| 0031116   | Positive_regulation_of_microtubule_polymerization                                              |   |             |          |   |          | G0: |
| _01       | 29                                                                                             | 0 | 1           | 1        | 0 | 0        | G0: |
| 0031124   | MRNA_3'-end_processing                                                                         |   |             |          |   |          | G0: |
| _01       | 8                                                                                              | 0 | 1           | 1        | 0 | 0        | G0: |
| 0031143   | Pseudopodium                                                                                   |   |             |          |   |          | G0: |
| _01       | 56                                                                                             | 1 | 1           | 1        | 0 | 0.000423 | G0: |
| 0031145   | Anaphase-promoting_complex-dependent_proteasomal_ubiquitin-dependent_protein_catabolic_process |   |             |          |   |          | G0: |
| _01       | 9                                                                                              | 0 | 1           | 1        | 0 | 0        | G0: |
| 0031146   | SCF-dependent_proteasomal_ubiquitin-dependent_protein_catabolic_process                        |   |             |          |   |          | G0: |
| _01       | 33                                                                                             | 0 | 1           | 1        | 0 | 0        | G0: |
| 0031175   | Neuron_projection_development                                                                  |   |             |          |   |          | G0: |
| _01       | 12                                                                                             | 0 | 1           | 1        | 0 | 0        | G0: |
| 0031201   | SNARE_complex                                                                                  |   |             |          |   |          | G0: |
| _01       | 12                                                                                             | 0 | 1           | 1        | 0 | 0        | G0: |
| 0031214   | Biomineral_tissue_development                                                                  |   |             |          |   |          | G0: |
| _01       | 8                                                                                              | 0 | 1           | 1        | 0 | 0        | G0: |
| 0031224   | Intrinsic_to_membrane                                                                          |   |             |          |   |          | G0: |
| _01       | 68                                                                                             | 0 | 1           | 1        | 0 | 0        | G0: |
| 0031225   | Anchored_to_membrane                                                                           |   |             |          |   |          | G0: |
| _01       | 10                                                                                             | 0 | 1           | 1        | 0 | 0        | G0: |
| 0031227   | Intrinsic_to_endoplasmic_reticulum_membrane                                                    |   |             |          |   |          | G0: |
| _01       | 5                                                                                              | 0 | 1           | 1        | 0 | 0        | G0: |
| 0031234   | Extrinsic_to_internal_side_of_plasma_membrane                                                  |   |             |          |   |          | G0: |
| _01       | 11                                                                                             | 0 | 1           | 1        | 0 | 0        | G0: |
| 0031252   | Cell_leading_edge                                                                              |   |             |          |   |          | G0: |

|         |                                                        |   |   |   |   |       |     |
|---------|--------------------------------------------------------|---|---|---|---|-------|-----|
| _01     | 6                                                      | 0 | 1 | 1 | 0 | 0     | G0: |
| 0031258 | Lamellipodium_membrane                                 |   |   |   |   |       |     |
| _01     | 6                                                      | 0 | 1 | 1 | 0 | 0     | G0: |
| 0031274 | Positive_regulation_of_pseudopodium_assembly           |   |   |   |   |       |     |
| _01     | 9                                                      | 0 | 1 | 1 | 0 | 0     | G0: |
| 0031290 | Retinal_ganglion_cell_axon_guidance                    |   |   |   |   |       |     |
| _01     | 7                                                      | 0 | 1 | 1 | 0 | 0     | G0: |
| 0031293 | Membrane_protein_intracellular_domain_proteolysis      |   |   |   |   |       |     |
| _01     | 36                                                     | 0 | 1 | 1 | 0 | 0     | G0: |
| 0031295 | T_cell_costimulation                                   |   |   |   |   |       |     |
| _01     | 5                                                      | 0 | 1 | 1 | 0 | 0     | G0: |
| 0031307 | Integral_to_mitochondrial_outer_membrane               |   |   |   |   |       |     |
| _01     | 12                                                     | 0 | 1 | 1 | 0 | 0     | G0: |
| 0031397 | Negative_regulation_of_protein_ubiquitination          |   |   |   |   |       |     |
| _01     | 17                                                     | 0 | 1 | 1 | 0 | 0     | G0: |
| 0031398 | Positive_regulation_of_protein_ubiquitination          |   |   |   |   |       |     |
| _01     | 164                                                    | 1 | 1 | 1 | 0 | 5e-05 | G0: |
| 0031410 | Cytoplasmic_vesicle                                    |   |   |   |   |       |     |
| _01     | 14                                                     | 0 | 1 | 1 | 0 | 0     | G0: |
| 0031418 | L-ascorbic_acid_binding                                |   |   |   |   |       |     |
| _01     | 7                                                      | 0 | 1 | 1 | 0 | 0     | G0: |
| 0031419 | Cobalamin_binding                                      |   |   |   |   |       |     |
| _01     | 26                                                     | 0 | 1 | 1 | 0 | 0     | G0: |
| 0031424 | Keratinization                                         |   |   |   |   |       |     |
| _01     | 6                                                      | 0 | 1 | 1 | 0 | 0     | G0: |
| 0031430 | M_band                                                 |   |   |   |   |       |     |
| _01     | 6                                                      | 0 | 1 | 1 | 0 | 0     | G0: |
| 0031432 | Titin_binding                                          |   |   |   |   |       |     |
| _01     | 5                                                      | 0 | 1 | 1 | 0 | 0     | G0: |
| 0031434 | Mitogen-activated_protein_kinase_kinase_binding        |   |   |   |   |       |     |
| _01     | 5                                                      | 0 | 1 | 1 | 0 | 0     | G0: |
| 0031435 | Mitogen-activated_protein_kinase_kinase_kinase_binding |   |   |   |   |       |     |
| _01     | 5                                                      | 0 | 1 | 1 | 0 | 0     | G0: |
| 0031461 | Cullin-RING_ubiquitin_ligase_complex                   |   |   |   |   |       |     |
| _01     | 7                                                      | 0 | 1 | 1 | 0 | 0     | G0: |
| 0031463 | Cul3-RING_ubiquitin_ligase_complex                     |   |   |   |   |       |     |
| _01     | 6                                                      | 0 | 1 | 1 | 0 | 0     | G0: |
| 0031490 | Chromatin_DNA_binding                                  |   |   |   |   |       |     |
| _01     | 5                                                      | 0 | 1 | 1 | 0 | 0     | G0: |
| 0031513 | Nonmotile_primary_cilium                               |   |   |   |   |       |     |
| _01     | 5                                                      | 0 | 1 | 1 | 0 | 0     | G0: |
| 0031514 | Motile_cilium                                          |   |   |   |   |       |     |
| _01     | 5                                                      | 0 | 1 | 1 | 0 | 0     | G0: |
| 0031519 | PcG_protein_complex                                    |   |   |   |   |       |     |
| _01     | 22                                                     | 0 | 1 | 1 | 0 | 0     | G0: |
| 0031526 | Brush_border_membrane                                  |   |   |   |   |       |     |
| _01     | 7                                                      | 0 | 1 | 1 | 0 | 0     | G0: |
| 0031527 | Filopodium_membrane                                    |   |   |   |   |       |     |
| _01     | 8                                                      | 0 | 1 | 1 | 0 | 0     | G0: |
| 0031528 | Microvillus_membrane                                   |   |   |   |   |       |     |
| _01     | 5                                                      | 0 | 1 | 1 | 0 | 0     | G0: |
| 0031529 | Ruffle_organization                                    |   |   |   |   |       |     |
| _01     | 15                                                     | 0 | 1 | 1 | 0 | 0     | G0: |
| 0031532 | Actin_cytoskeleton_reorganization                      |   |   |   |   |       |     |

|         |                                                                                  |   |   |   |   |         |     |
|---------|----------------------------------------------------------------------------------|---|---|---|---|---------|-----|
| _01     | 9                                                                                | 0 | 1 | 1 | 0 | 0       | G0: |
| 0031572 | G2/M_transition_DNA_damage_checkpoint                                            |   |   |   |   |         | G0: |
| _01     | 8                                                                                | 0 | 1 | 1 | 0 | 0       | G0: |
| 0031581 | Hemidesmosome_assembly                                                           |   |   |   |   |         | G0: |
| _01     | 6                                                                                | 0 | 1 | 1 | 0 | 0       | G0: |
| 0031593 | Polyubiquitin_binding                                                            |   |   |   |   |         | G0: |
| _01     | 19                                                                               | 0 | 1 | 1 | 0 | 0       | G0: |
| 0031594 | Neuromuscular_junction                                                           |   |   |   |   |         | G0: |
| _01     | 8                                                                                | 1 | 1 | 1 | 0 | 3.9e-05 | G0: |
| 0031622 | Positive_regulation_of_fever                                                     |   |   |   |   |         | G0: |
| _01     | 9                                                                                | 0 | 1 | 1 | 0 | 0       | G0: |
| 0031623 | Receptor_internalization                                                         |   |   |   |   |         | G0: |
| _01     | 49                                                                               | 0 | 1 | 1 | 0 | 0       | G0: |
| 0031625 | Ubiquitin_protein_ligase_binding                                                 |   |   |   |   |         | G0: |
| _01     | 10                                                                               | 0 | 1 | 1 | 0 | 0       | G0: |
| 0031647 | Regulation_of_protein_stability                                                  |   |   |   |   |         | G0: |
| _01     | 10                                                                               | 0 | 1 | 1 | 0 | 0       | G0: |
| 0031648 | Protein_destabilization                                                          |   |   |   |   |         | G0: |
| _01     | 5                                                                                | 0 | 1 | 1 | 0 | 0       | G0: |
| 0031659 | Positive_regulation_of_cyclin-dependent_protein_kinase_activity_involved_in_G1/S |   |   |   |   |         | G0: |
| _01     | 5                                                                                | 0 | 1 | 1 | 0 | 0       | G0: |
| 0031663 | Lipopolysaccharide-mediated_signaling_pathway                                    |   |   |   |   |         | G0: |
| _01     | 10                                                                               | 0 | 1 | 1 | 0 | 0       | G0: |
| 0031667 | Response_to_nutrient_levels                                                      |   |   |   |   |         | G0: |
| _01     | 13                                                                               | 0 | 1 | 1 | 0 | 0       | G0: |
| 0031668 | Cellular_response_to_extracellular_stimulus                                      |   |   |   |   |         | G0: |
| _01     | 5                                                                                | 0 | 1 | 1 | 0 | 0       | G0: |
| 0031672 | A_band                                                                           |   |   |   |   |         | G0: |
| _01     | 7                                                                                | 1 | 1 | 1 | 0 | 5e-05   | G0: |
| 0031674 | I_band                                                                           |   |   |   |   |         | G0: |
| _01     | 24                                                                               | 0 | 1 | 1 | 0 | 0       | G0: |
| 0031901 | Early_endosome_membrane                                                          |   |   |   |   |         | G0: |
| _01     | 36                                                                               | 0 | 1 | 1 | 0 | 0       | G0: |
| 0031902 | Late_endosome_membrane                                                           |   |   |   |   |         | G0: |
| _01     | 5                                                                                | 0 | 1 | 1 | 0 | 0       | G0: |
| 0031929 | TOR_signaling_cascade                                                            |   |   |   |   |         | G0: |
| _01     | 10                                                                               | 0 | 1 | 1 | 0 | 0       | G0: |
| 0031941 | Filamentous_actin                                                                |   |   |   |   |         | G0: |
| _01     | 5                                                                                | 0 | 1 | 1 | 0 | 0       | G0: |
| 0031953 | Negative_regulation_of_protein_autophosphorylation                               |   |   |   |   |         | G0: |
| _01     | 5                                                                                | 0 | 1 | 1 | 0 | 0       | G0: |
| 0031954 | Positive_regulation_of_protein_autophosphorylation                               |   |   |   |   |         | G0: |
| _01     | 69                                                                               | 0 | 1 | 1 | 0 | 0       | G0: |
| 0031965 | Nuclear_membrane                                                                 |   |   |   |   |         | G0: |
| _01     | 23                                                                               | 0 | 1 | 1 | 0 | 0       | G0: |
| 0031966 | Mitochondrial_membrane                                                           |   |   |   |   |         | G0: |
| _01     | 13                                                                               | 0 | 1 | 1 | 0 | 0       | G0: |
| 0031982 | Vesicle                                                                          |   |   |   |   |         | G0: |
| _01     | 6                                                                                | 0 | 1 | 1 | 0 | 0       | G0: |
| 0031988 | Membrane-bounded_vesicle                                                         |   |   |   |   |         | G0: |
| _01     | 5                                                                                | 0 | 1 | 1 | 0 | 0       | G0: |
| 0032007 | Negative_regulation_of_TOR_signaling_cascade                                     |   |   |   |   |         | G0: |
| _01     | 9                                                                                | 0 | 1 | 1 | 0 | 0       | G0: |





|         |                                                                                  |   |             |          |   |          |            |
|---------|----------------------------------------------------------------------------------|---|-------------|----------|---|----------|------------|
| _01     | 9                                                                                | 0 | 1           | 1        | 0 | 0        | G0:        |
| 0032391 | Photoreceptor_connecting_cilium                                                  |   |             |          |   |          | G0:        |
| _01     | 68                                                                               | 0 | 1           | 1        | 0 | 0        | G0:        |
| 0032403 | Protein_complex_binding                                                          |   |             |          |   |          | G0:        |
| _01     | 14                                                                               | 0 | 1           | 1        | 0 | 0        | G0:        |
| 0032420 | Stereocilium                                                                     |   |             |          |   |          | G0:        |
| _01     | 13                                                                               | 0 | 1           | 1        | 0 | 0        | G0:        |
| 0032436 | Positive_regulation_of_proteasomal_ubiquitin-dependent_protein_catabolic_process |   |             |          |   |          | G0:        |
| _01     | 6                                                                                | 0 | 1           | 1        | 0 | 0        | G0:        |
| 0032438 | Melanosome_organization                                                          |   |             |          |   |          | G0:        |
| _01     | 67                                                                               | 2 | 0.000601999 | 0.124557 | 0 | 0.000189 | G0:0032496 |
| 0032496 | Response_to_lipopolysaccharide                                                   |   |             |          |   |          | G0:        |
| _01     | 6                                                                                | 0 | 1           | 1        | 0 | 0        | G0:        |
| 0032508 | DNA_duplex_unwinding                                                             |   |             |          |   |          | G0:        |
| _01     | 30                                                                               | 0 | 1           | 1        | 0 | 0        | G0:        |
| 0032526 | Response_to_retinoic_acid                                                        |   |             |          |   |          | G0:        |
| _01     | 17                                                                               | 0 | 1           | 1        | 0 | 0        | G0:        |
| 0032570 | Response_to_progesterone_stimulus                                                |   |             |          |   |          | G0:        |
| _01     | 44                                                                               | 0 | 1           | 1        | 0 | 0        | G0:        |
| 0032580 | Golgi_cisterna_membrane                                                          |   |             |          |   |          | G0:        |
| _01     | 27                                                                               | 0 | 1           | 1        | 0 | 0        | G0:        |
| 0032582 | Negative_regulation_of_gene-specific_transcription                               |   |             |          |   |          | G0:        |
| _01     | 8                                                                                | 0 | 1           | 1        | 0 | 0        | G0:        |
| 0032583 | Regulation_of_gene-specific_transcription                                        |   |             |          |   |          | G0:        |
| _01     | 5                                                                                | 0 | 1           | 1        | 0 | 0        | G0:        |
| 0032585 | Multivesicular_body_membrane                                                     |   |             |          |   |          | G0:        |
| _01     | 20                                                                               | 0 | 1           | 1        | 0 | 0        | G0:        |
| 0032587 | Ruffle_membrane                                                                  |   |             |          |   |          | G0:        |
| _01     | 6                                                                                | 0 | 1           | 1        | 0 | 0        | G0:        |
| 0032689 | Negative_regulation_of_interferon-gamma_production                               |   |             |          |   |          | G0:        |
| _01     | 8                                                                                | 0 | 1           | 1        | 0 | 0        | G0:        |
| 0032715 | Negative_regulation_of_interleukin-6_production                                  |   |             |          |   |          | G0:        |
| _01     | 12                                                                               | 0 | 1           | 1        | 0 | 0        | G0:        |
| 0032720 | Negative_regulation_of_tumor_necrosis_factor_production                          |   |             |          |   |          | G0:        |
| _01     | 9                                                                                | 0 | 1           | 1        | 0 | 0        | G0:        |
| 0032722 | Positive_regulation_of_chemokine_production                                      |   |             |          |   |          | G0:        |
| _01     | 9                                                                                | 0 | 1           | 1        | 0 | 0        | G0:        |
| 0032728 | Positive_regulation_of_interferon-beta_production                                |   |             |          |   |          | G0:        |
| _01     | 6                                                                                | 0 | 1           | 1        | 0 | 0        | G0:        |
| 0032729 | Positive_regulation_of_interferon-gamma_production                               |   |             |          |   |          | G0:        |
| _01     | 9                                                                                | 0 | 1           | 1        | 0 | 0        | G0:        |
| 0032735 | Positive_regulation_of_interleukin-12_production                                 |   |             |          |   |          | G0:        |
| _01     | 16                                                                               | 0 | 1           | 1        | 0 | 0        | G0:        |
| 0032755 | Positive_regulation_of_interleukin-6_production                                  |   |             |          |   |          | G0:        |
| _01     | 6                                                                                | 0 | 1           | 1        | 0 | 0        | G0:        |
| 0032757 | Positive_regulation_of_interleukin-8_production                                  |   |             |          |   |          | G0:        |
| _01     | 9                                                                                | 0 | 1           | 1        | 0 | 0        | G0:        |
| 0032760 | Positive_regulation_of_tumor_necrosis_factor_production                          |   |             |          |   |          | G0:        |
| _01     | 7                                                                                | 0 | 1           | 1        | 0 | 0        | G0:        |
| 0032781 | Positive_regulation_of_ATPase_activity                                           |   |             |          |   |          | G0:        |
| _01     | 6                                                                                | 0 | 1           | 1        | 0 | 0        | G0:        |
| 0032839 | Dendrite_cytoplasm                                                               |   |             |          |   |          | G0:        |
| _01     | 5                                                                                | 0 | 1           | 1        | 0 | 0        | G0:        |

|         |                                                        |   |   |   |   |         |  |     |
|---------|--------------------------------------------------------|---|---|---|---|---------|--|-----|
| 0032862 | Activation_of_Rho_GTPase_activity                      |   |   |   |   |         |  |     |
| _01     | 36                                                     | 0 | 1 | 1 | 0 | 0       |  | GO: |
| 0032868 | Response_to_insulin_stimulus                           |   |   |   |   |         |  |     |
| _01     | 31                                                     | 0 | 1 | 1 | 0 | 0       |  | GO: |
| 0032869 | Cellular_response_to_insulin_stimulus                  |   |   |   |   |         |  |     |
| _01     | 22                                                     | 0 | 1 | 1 | 0 | 0       |  | GO: |
| 0032870 | Cellular_response_to_hormone_stimulus                  |   |   |   |   |         |  |     |
| _01     | 8                                                      | 0 | 1 | 1 | 0 | 0       |  | GO: |
| 0032874 | Positive_regulation_of_stress-activated_MAPK_cascade   |   |   |   |   |         |  |     |
| _01     | 14                                                     | 0 | 1 | 1 | 0 | 0       |  | GO: |
| 0032880 | Regulation_of_protein_localization                     |   |   |   |   |         |  |     |
| _01     | 5                                                      | 0 | 1 | 1 | 0 | 0       |  | GO: |
| 0032925 | Regulation_of_activin_receptor_signaling_pathway       |   |   |   |   |         |  |     |
| _01     | 6                                                      | 0 | 1 | 1 | 0 | 0       |  | GO: |
| 0032947 | Protein_complex_scaffold                               |   |   |   |   |         |  |     |
| _01     | 11                                                     | 0 | 1 | 1 | 0 | 0       |  | GO: |
| 0032956 | Regulation_of_actin_cytoskeleton_organization          |   |   |   |   |         |  |     |
| _01     | 9                                                      | 0 | 1 | 1 | 0 | 0       |  | GO: |
| 0032967 | Positive_regulation_of_collagen_biosynthetic_process   |   |   |   |   |         |  |     |
| _01     | 6                                                      | 0 | 1 | 1 | 0 | 0       |  | GO: |
| 0032981 | Mitochondrial_respiratory_chain_complex_I_assembly     |   |   |   |   |         |  |     |
| _01     | 13                                                     | 0 | 1 | 1 | 0 | 0       |  | GO: |
| 0032982 | Myosin_filament                                        |   |   |   |   |         |  |     |
| _01     | 12                                                     | 0 | 1 | 1 | 0 | 0       |  | GO: |
| 0033017 | Sarcoplasmic_reticulum_membrane                        |   |   |   |   |         |  |     |
| _01     | 14                                                     | 0 | 1 | 1 | 0 | 0       |  | GO: |
| 0033077 | T_cell_differentiation_in_thymus                       |   |   |   |   |         |  |     |
| _01     | 11                                                     | 0 | 1 | 1 | 0 | 0       |  | GO: |
| 0033116 | ER-Golgi_intermediate_compartment_membrane             |   |   |   |   |         |  |     |
| _01     | 7                                                      | 0 | 1 | 1 | 0 | 0       |  | GO: |
| 0033137 | Negative_regulation_of_peptidyl-serine_phosphorylation |   |   |   |   |         |  |     |
| _01     | 14                                                     | 0 | 1 | 1 | 0 | 0       |  | GO: |
| 0033138 | Positive_regulation_of_peptidyl-serine_phosphorylation |   |   |   |   |         |  |     |
| _01     | 6                                                      | 0 | 1 | 1 | 0 | 0       |  | GO: |
| 0033151 | V(D)J_recombination                                    |   |   |   |   |         |  |     |
| _01     | 5                                                      | 0 | 1 | 1 | 0 | 0       |  | GO: |
| 0033162 | Melanosome_membrane                                    |   |   |   |   |         |  |     |
| _01     | 5                                                      | 0 | 1 | 1 | 0 | 0       |  | GO: |
| 0033169 | Histone_H3-K9_demethylation                            |   |   |   |   |         |  |     |
| _01     | 6                                                      | 0 | 1 | 1 | 0 | 0       |  | GO: |
| 0033180 | Proton-transporting_V-type_ATPase,_V1_domain           |   |   |   |   |         |  |     |
| _01     | 6                                                      | 0 | 1 | 1 | 0 | 0       |  | GO: |
| 0033189 | Response_to_vitamin_A                                  |   |   |   |   |         |  |     |
| _01     | 13                                                     | 0 | 1 | 1 | 0 | 0       |  | GO: |
| 0033198 | Response_to_ATP                                        |   |   |   |   |         |  |     |
| _01     | 8                                                      | 0 | 1 | 1 | 0 | 0       |  | GO: |
| 0033209 | Tumor_necrosis_factor-mediated_signaling_pathway       |   |   |   |   |         |  |     |
| _01     | 5                                                      | 0 | 1 | 1 | 0 | 0       |  | GO: |
| 0033235 | Positive_regulation_of_protein_sumoylation             |   |   |   |   |         |  |     |
| _01     | 9                                                      | 0 | 1 | 1 | 0 | 0       |  | GO: |
| 0033276 | Transcription_factor_TFTC_complex                      |   |   |   |   |         |  |     |
| _01     | 13                                                     | 1 | 1 | 1 | 0 | 3.9e-05 |  | GO: |
| 0033280 | Response_to_vitamin_D                                  |   |   |   |   |         |  |     |
| _01     | 14                                                     | 0 | 1 | 1 | 0 | 0       |  | GO: |

|            |                                                                                         |   |          |           |   |          |     |  |
|------------|-----------------------------------------------------------------------------------------|---|----------|-----------|---|----------|-----|--|
| 0033344    | Cholesterol_efflux                                                                      |   |          |           |   |          |     |  |
| _01        | 5                                                                                       | 0 | 1        | 1         | 0 | 0        | G0: |  |
| 0033391    | Chromatoid_body                                                                         |   |          |           |   |          |     |  |
| _01        | 6                                                                                       | 0 | 1        | 1         | 0 | 0        | G0: |  |
| 0033523    | Histone_H2B_ubiquitination                                                              |   |          |           |   |          |     |  |
| _01        | 7                                                                                       | 0 | 1        | 1         | 0 | 0        | G0: |  |
| 0033540    | Fatty_acid_beta-oxidation_using_acyl-CoA_oxidase                                        |   |          |           |   |          |     |  |
| _01        | 6                                                                                       | 0 | 1        | 1         | 0 | 0        | G0: |  |
| 0033558    | Protein_deacetylase_activity                                                            |   |          |           |   |          |     |  |
| _01        | 8                                                                                       | 0 | 1        | 1         | 0 | 0        | G0: |  |
| 0033574    | Response_to_testosterone_stimulus                                                       |   |          |           |   |          |     |  |
| _01        | 8                                                                                       | 0 | 1        | 1         | 0 | 0        | G0: |  |
| 0033613    | Activating_transcription_factor_binding                                                 |   |          |           |   |          |     |  |
| _01        | 6                                                                                       | 0 | 1        | 1         | 0 | 0        | G0: |  |
| 0033700    | Phospholipid_efflux                                                                     |   |          |           |   |          |     |  |
| _01        | 5                                                                                       | 0 | 1        | 1         | 0 | 0        | G0: |  |
| 0033993    | Response_to_lipid                                                                       |   |          |           |   |          |     |  |
| _01        | 6                                                                                       | 0 | 1        | 1         | 0 | 0        | G0: |  |
| 0034045    | Pre-autophagosomal_structure_membrane                                                   |   |          |           |   |          |     |  |
| _01        | 6                                                                                       | 0 | 1        | 1         | 0 | 0        | G0: |  |
| 0034080    | CenH3-containing_nucleosome_assembly_at_centromere                                      |   |          |           |   |          |     |  |
| _01        | 37                                                                                      | 2 | 0.000151 | 0.0549709 | 0 | 0.000189 |     |  |
| G0:0034097 | Response_to_cytokine_stimulus                                                           |   |          |           |   |          |     |  |
| _01        | 41                                                                                      | 0 | 1        | 1         | 0 | 0        | G0: |  |
| 0034138    | Toll-like_receptor_3_signaling_pathway                                                  |   |          |           |   |          |     |  |
| _01        | 6                                                                                       | 0 | 1        | 1         | 0 | 0        | G0: |  |
| 0034185    | Apolipoprotein_binding                                                                  |   |          |           |   |          |     |  |
| _01        | 9                                                                                       | 0 | 1        | 1         | 0 | 0        | G0: |  |
| 0034199    | Activation_of_protein_kinase_A_activity                                                 |   |          |           |   |          |     |  |
| _01        | 5                                                                                       | 0 | 1        | 1         | 0 | 0        | G0: |  |
| 0034237    | Protein_kinase_A_regulatory_subunit_binding                                             |   |          |           |   |          |     |  |
| _01        | 64                                                                                      | 0 | 1        | 1         | 0 | 0        | G0: |  |
| 0034329    | Cell_junction_assembly                                                                  |   |          |           |   |          |     |  |
| _01        | 24                                                                                      | 0 | 1        | 1         | 0 | 0        | G0: |  |
| 0034332    | Adherens_junction_organization                                                          |   |          |           |   |          |     |  |
| _01        | 38                                                                                      | 0 | 1        | 1         | 0 | 0        | G0: |  |
| 0034339    | Regulation_of_transcription_from_RNA_polymerase_II_promoter_by_nuclear_hormone_receptor |   |          |           |   |          |     |  |
| _01        | 7                                                                                       | 0 | 1        | 1         | 0 | 0        | G0: |  |
| 0034341    | Response_to_interferon-gamma                                                            |   |          |           |   |          |     |  |
| _01        | 13                                                                                      | 0 | 1        | 1         | 0 | 0        | G0: |  |
| 0034361    | Very-low-density_lipoprotein_particle                                                   |   |          |           |   |          |     |  |
| _01        | 9                                                                                       | 0 | 1        | 1         | 0 | 0        | G0: |  |
| 0034362    | Low-density_lipoprotein_particle                                                        |   |          |           |   |          |     |  |
| _01        | 12                                                                                      | 0 | 1        | 1         | 0 | 0        | G0: |  |
| 0034364    | High-density_lipoprotein_particle                                                       |   |          |           |   |          |     |  |
| _01        | 6                                                                                       | 0 | 1        | 1         | 0 | 0        | G0: |  |
| 0034374    | Low-density_lipoprotein_particle_remodeling                                             |   |          |           |   |          |     |  |
| _01        | 8                                                                                       | 0 | 1        | 1         | 0 | 0        | G0: |  |
| 0034375    | High-density_lipoprotein_particle_remodeling                                            |   |          |           |   |          |     |  |
| _01        | 9                                                                                       | 0 | 1        | 1         | 0 | 0        | G0: |  |
| 0034394    | Protein_localization_at_cell_surface                                                    |   |          |           |   |          |     |  |
| _01        | 6                                                                                       | 0 | 1        | 1         | 0 | 0        | G0: |  |

|         |                                                         |   |   |   |   |         |  |     |
|---------|---------------------------------------------------------|---|---|---|---|---------|--|-----|
| 0034405 | Response_to_fluid_shear_stress                          |   |   |   |   |         |  |     |
| _01     | 8                                                       | 0 | 1 | 1 | 0 | 0       |  | GO: |
| 0034446 | Substrate_adhesion-dependent_cell_spreading             |   |   |   |   |         |  |     |
| _01     | 5                                                       | 0 | 1 | 1 | 0 | 0       |  | GO: |
| 0034450 | Ubiquitin-ubiquitin_ligase_activity                     |   |   |   |   |         |  |     |
| _01     | 8                                                       | 0 | 1 | 1 | 0 | 0       |  | GO: |
| 0034453 | Microtubule_anchoring                                   |   |   |   |   |         |  |     |
| _01     | 5                                                       | 0 | 1 | 1 | 0 | 0       |  | GO: |
| 0034464 | BBSome                                                  |   |   |   |   |         |  |     |
| _01     | 5                                                       | 0 | 1 | 1 | 0 | 0       |  | GO: |
| 0034501 | Protein_localization_to_kinetochore                     |   |   |   |   |         |  |     |
| _01     | 8                                                       | 0 | 1 | 1 | 0 | 0       |  | GO: |
| 0034504 | Protein_localization_to_nucleus                         |   |   |   |   |         |  |     |
| _01     | 11                                                      | 1 | 1 | 1 | 0 | 5.2e-05 |  | GO: |
| 0034605 | Cellular_response_to_heat                               |   |   |   |   |         |  |     |
| _01     | 10                                                      | 0 | 1 | 1 | 0 | 0       |  | GO: |
| 0034612 | Response_to_tumor_necrosis_factor                       |   |   |   |   |         |  |     |
| _01     | 12                                                      | 0 | 1 | 1 | 0 | 0       |  | GO: |
| 0034613 | Cellular_protein_localization                           |   |   |   |   |         |  |     |
| _01     | 6                                                       | 0 | 1 | 1 | 0 | 0       |  | GO: |
| 0034614 | Cellular_response_to_reactive_oxygen_species            |   |   |   |   |         |  |     |
| _01     | 7                                                       | 0 | 1 | 1 | 0 | 0       |  | GO: |
| 0034644 | Cellular_response_to_UV                                 |   |   |   |   |         |  |     |
| _01     | 11                                                      | 0 | 1 | 1 | 0 | 0       |  | GO: |
| 0034660 | NcrRNA_metabolic_process                                |   |   |   |   |         |  |     |
| _01     | 6                                                       | 0 | 1 | 1 | 0 | 0       |  | GO: |
| 0034704 | Calcium_channel_complex                                 |   |   |   |   |         |  |     |
| _01     | 38                                                      | 0 | 1 | 1 | 0 | 0       |  | GO: |
| 0034707 | Chloride_channel_complex                                |   |   |   |   |         |  |     |
| _01     | 6                                                       | 0 | 1 | 1 | 0 | 0       |  | GO: |
| 0034713 | Type_I_transforming_growth_factor_beta_receptor_binding |   |   |   |   |         |  |     |
| _01     | 6                                                       | 0 | 1 | 1 | 0 | 0       |  | GO: |
| 0034976 | Response_to_endoplasmic_reticulum_stress                |   |   |   |   |         |  |     |
| _01     | 5                                                       | 0 | 1 | 1 | 0 | 0       |  | GO: |
| 0034993 | SUN-KASH_complex                                        |   |   |   |   |         |  |     |
| _01     | 8                                                       | 0 | 1 | 1 | 0 | 0       |  | GO: |
| 0035019 | Somatic_stem_cell_maintenance                           |   |   |   |   |         |  |     |
| _01     | 45                                                      | 0 | 1 | 1 | 0 | 0       |  | GO: |
| 0035023 | Regulation_of_Rho_protein_signal_transduction           |   |   |   |   |         |  |     |
| _01     | 6                                                       | 0 | 1 | 1 | 0 | 0       |  | GO: |
| 0035024 | Negative_regulation_of_Rho_protein_signal_transduction  |   |   |   |   |         |  |     |
| _01     | 5                                                       | 0 | 1 | 1 | 0 | 0       |  | GO: |
| 0035025 | Positive_regulation_of_Rho_protein_signal_transduction  |   |   |   |   |         |  |     |
| _01     | 6                                                       | 0 | 1 | 1 | 0 | 0       |  | GO: |
| 0035035 | Histone_acetyltransferase_binding                       |   |   |   |   |         |  |     |
| _01     | 12                                                      | 0 | 1 | 1 | 0 | 0       |  | GO: |
| 0035050 | Embryonic_heart_tube_development                        |   |   |   |   |         |  |     |
| _01     | 14                                                      | 0 | 1 | 1 | 0 | 0       |  | GO: |
| 0035064 | Methylated_histone_residue_binding                      |   |   |   |   |         |  |     |
| _01     | 13                                                      | 0 | 1 | 1 | 0 | 0       |  | GO: |
| 0035085 | Cilium_axoneme                                          |   |   |   |   |         |  |     |
| _01     | 37                                                      | 0 | 1 | 1 | 0 | 0       |  | GO: |
| 0035091 | Phosphoinositide_binding                                |   |   |   |   |         |  |     |
| _01     | 9                                                       | 0 | 1 | 1 | 0 | 0       |  | GO: |

|         |                                                                            |   |   |   |   |          |     |  |
|---------|----------------------------------------------------------------------------|---|---|---|---|----------|-----|--|
| 0035094 | Response_to_nicotine                                                       |   |   |   |   |          |     |  |
| _01     | 12                                                                         | 1 | 1 | 1 | 0 | 0.000423 | G0: |  |
| 0035097 | Histone_methyltransferase_complex                                          |   |   |   |   |          |     |  |
| _01     | 10                                                                         | 0 | 1 | 1 | 0 | 0        | G0: |  |
| 0035115 | Embryonic_forelimb_morphogenesis                                           |   |   |   |   |          |     |  |
| _01     | 14                                                                         | 0 | 1 | 1 | 0 | 0        | G0: |  |
| 0035116 | Embryonic_hindlimb_morphogenesis                                           |   |   |   |   |          |     |  |
| _01     | 9                                                                          | 0 | 1 | 1 | 0 | 0        | G0: |  |
| 0035121 | Tail_morphogenesis                                                         |   |   |   |   |          |     |  |
| _01     | 5                                                                          | 0 | 1 | 1 | 0 | 0        | G0: |  |
| 0035136 | Forelimb_morphogenesis                                                     |   |   |   |   |          |     |  |
| _01     | 7                                                                          | 0 | 1 | 1 | 0 | 0        | G0: |  |
| 0035162 | Embryonic_hemopoiesis                                                      |   |   |   |   |          |     |  |
| _01     | 11                                                                         | 0 | 1 | 1 | 0 | 0        | G0: |  |
| 0035176 | Social_behavior                                                            |   |   |   |   |          |     |  |
| _01     | 5                                                                          | 0 | 1 | 1 | 0 | 0        | G0: |  |
| 0035235 | Ionotropic_glutamate_receptor_signaling_pathway                            |   |   |   |   |          |     |  |
| _01     | 8                                                                          | 0 | 1 | 1 | 0 | 0        | G0: |  |
| 0035249 | Synaptic_transmission,_glutamatergic                                       |   |   |   |   |          |     |  |
| _01     | 7                                                                          | 0 | 1 | 1 | 0 | 0        | G0: |  |
| 0035253 | Ciliary_rootlet                                                            |   |   |   |   |          |     |  |
| _01     | 15                                                                         | 0 | 1 | 1 | 0 | 0        | G0: |  |
| 0035264 | Multicellular_organism_growth                                              |   |   |   |   |          |     |  |
| _01     | 8                                                                          | 0 | 1 | 1 | 0 | 0        | G0: |  |
| 0035265 | Organ_growth                                                               |   |   |   |   |          |     |  |
| _01     | 12                                                                         | 0 | 1 | 1 | 0 | 0        | G0: |  |
| 0035267 | NuA4_histone_acetyltransferase_complex                                     |   |   |   |   |          |     |  |
| _01     | 5                                                                          | 0 | 1 | 1 | 0 | 0        | G0: |  |
| 0035313 | Wound_healing,_spreading_of_epidermal_cells                                |   |   |   |   |          |     |  |
| _01     | 8                                                                          | 0 | 1 | 1 | 0 | 0        | G0: |  |
| 0035329 | Hippo_signaling_cascade                                                    |   |   |   |   |          |     |  |
| _01     | 11                                                                         | 0 | 1 | 1 | 0 | 0        | G0: |  |
| 0035338 | Long-chain_fatty-acyl-CoA_biosynthetic_process                             |   |   |   |   |          |     |  |
| _01     | 22                                                                         | 0 | 1 | 1 | 0 | 0        | G0: |  |
| 0040007 | Growth                                                                     |   |   |   |   |          |     |  |
| _01     | 38                                                                         | 0 | 1 | 1 | 0 | 0        | G0: |  |
| 0040008 | Regulation_of_growth                                                       |   |   |   |   |          |     |  |
| _01     | 15                                                                         | 0 | 1 | 1 | 0 | 0        | G0: |  |
| 0040014 | Regulation_of_multicellular_organism_growth                                |   |   |   |   |          |     |  |
| _01     | 15                                                                         | 0 | 1 | 1 | 0 | 0        | G0: |  |
| 0040018 | Positive_regulation_of_multicellular_organism_growth                       |   |   |   |   |          |     |  |
| _01     | 5                                                                          | 0 | 1 | 1 | 0 | 0        | G0: |  |
| 0040037 | Negative_regulation_of_fibroblast_growth_factor_receptor_signaling_pathway |   |   |   |   |          |     |  |
| _01     | 12                                                                         | 0 | 1 | 1 | 0 | 0        | G0: |  |
| 0042056 | Chemoattractant_activity                                                   |   |   |   |   |          |     |  |
| _01     | 24                                                                         | 0 | 1 | 1 | 0 | 0        | G0: |  |
| 0042059 | Negative_regulation_of_epidermal_growth_factor_receptor_signaling_pathway  |   |   |   |   |          |     |  |
| _01     | 32                                                                         | 0 | 1 | 1 | 0 | 0        | G0: |  |
| 0042060 | Wound_healing                                                              |   |   |   |   |          |     |  |
| _01     | 5                                                                          | 0 | 1 | 1 | 0 | 0        | G0: |  |

|         |                                                       |   |   |   |   |         |     |  |
|---------|-------------------------------------------------------|---|---|---|---|---------|-----|--|
| 0042074 | Cell_migration_involved_in_gastrulation               |   |   |   |   |         |     |  |
| _01     | 7                                                     | 0 | 1 | 1 | 0 | 0       | G0: |  |
| 0042088 | T-helper_1_type_immune_response                       |   |   |   |   |         |     |  |
| _01     | 10                                                    | 0 | 1 | 1 | 0 | 0       | G0: |  |
| 0042098 | T_cell_proliferation                                  |   |   |   |   |         |     |  |
| _01     | 10                                                    | 0 | 1 | 1 | 0 | 0       | G0: |  |
| 0042100 | B_cell_proliferation                                  |   |   |   |   |         |     |  |
| _01     | 9                                                     | 0 | 1 | 1 | 0 | 0       | G0: |  |
| 0042101 | T_cell_receptor_complex                               |   |   |   |   |         |     |  |
| _01     | 20                                                    | 0 | 1 | 1 | 0 | 0       | G0: |  |
| 0042102 | Positive_regulation_of_T_cell_proliferation           |   |   |   |   |         |     |  |
| _01     | 7                                                     | 0 | 1 | 1 | 0 | 0       | G0: |  |
| 0042104 | Positive_regulation_of_activated_T_cell_proliferation |   |   |   |   |         |     |  |
| _01     | 15                                                    | 1 | 1 | 1 | 0 | 7.4e-05 | G0: |  |
| 0042110 | T_cell_activation                                     |   |   |   |   |         |     |  |
| _01     | 12                                                    | 0 | 1 | 1 | 0 | 0       | G0: |  |
| 0042113 | B_cell_activation                                     |   |   |   |   |         |     |  |
| _01     | 5                                                     | 0 | 1 | 1 | 0 | 0       | G0: |  |
| 0042116 | Macrophage_activation                                 |   |   |   |   |         |     |  |
| _01     | 53                                                    | 1 | 1 | 1 | 0 | 8.3e-05 | G0: |  |
| 0042127 | Regulation_of_cell_proliferation                      |   |   |   |   |         |     |  |
| _01     | 11                                                    | 0 | 1 | 1 | 0 | 0       | G0: |  |
| 0042130 | Negative_regulation_of_T_cell_proliferation           |   |   |   |   |         |     |  |
| _01     | 5                                                     | 0 | 1 | 1 | 0 | 0       | G0: |  |
| 0042135 | Neurotransmitter_catabolic_process                    |   |   |   |   |         |     |  |
| _01     | 5                                                     | 0 | 1 | 1 | 0 | 0       | G0: |  |
| 0042136 | Neurotransmitter_biosynthetic_process                 |   |   |   |   |         |     |  |
| _01     | 8                                                     | 0 | 1 | 1 | 0 | 0       | G0: |  |
| 0042147 | Retrograde_transport,_endosome_to_Golgi               |   |   |   |   |         |     |  |
| _01     | 5                                                     | 0 | 1 | 1 | 0 | 0       | G0: |  |
| 0042153 | RPTP-like_protein_binding                             |   |   |   |   |         |     |  |
| _01     | 19                                                    | 0 | 1 | 1 | 0 | 0       | G0: |  |
| 0042157 | Lipoprotein_metabolic_process                         |   |   |   |   |         |     |  |
| _01     | 5                                                     | 0 | 1 | 1 | 0 | 0       | G0: |  |
| 0042162 | Telomeric_DNA_binding                                 |   |   |   |   |         |     |  |
| _01     | 5                                                     | 0 | 1 | 1 | 0 | 0       | G0: |  |
| 0042166 | Acetylcholine_binding                                 |   |   |   |   |         |     |  |
| _01     | 16                                                    | 0 | 1 | 1 | 0 | 0       | G0: |  |
| 0042169 | SH2_domain_binding                                    |   |   |   |   |         |     |  |
| _01     | 8                                                     | 0 | 1 | 1 | 0 | 0       | G0: |  |
| 0042176 | Regulation_of_protein_catabolic_process               |   |   |   |   |         |     |  |
| _01     | 10                                                    | 0 | 1 | 1 | 0 | 0       | G0: |  |
| 0042177 | Negative_regulation_of_protein_catabolic_process      |   |   |   |   |         |     |  |
| _01     | 13                                                    | 0 | 1 | 1 | 0 | 0       | G0: |  |
| 0042220 | Response_to_cocaine                                   |   |   |   |   |         |     |  |
| _01     | 8                                                     | 0 | 1 | 1 | 0 | 0       | G0: |  |
| 0042221 | Response_to_chemical_stimulus                         |   |   |   |   |         |     |  |
| _01     | 14                                                    | 0 | 1 | 1 | 0 | 0       | G0: |  |
| 0042246 | Tissue_regeneration                                   |   |   |   |   |         |     |  |
| _01     | 16                                                    | 0 | 1 | 1 | 0 | 0       | G0: |  |
| 0042254 | Ribosome_biogenesis                                   |   |   |   |   |         |     |  |
| _01     | 7                                                     | 0 | 1 | 1 | 0 | 0       | G0: |  |
| 0042274 | Ribosomal_small_subunit_biogenesis                    |   |   |   |   |         |     |  |
| _01     | 20                                                    | 0 | 1 | 1 | 0 | 0       | G0: |  |

|         |                                                      |   |   |   |   |          |  |     |
|---------|------------------------------------------------------|---|---|---|---|----------|--|-----|
| 0042277 | Peptide_binding                                      |   |   |   |   |          |  |     |
| _01     | 5                                                    | 0 | 1 | 1 | 0 | 0        |  | GO: |
| 0042288 | MHC_class_I_protein_binding                          |   |   |   |   |          |  |     |
| _01     | 9                                                    | 0 | 1 | 1 | 0 | 0        |  | GO: |
| 0042301 | Phosphate_binding                                    |   |   |   |   |          |  |     |
| _01     | 6                                                    | 0 | 1 | 1 | 0 | 0        |  | GO: |
| 0042310 | Vasoconstriction                                     |   |   |   |   |          |  |     |
| _01     | 8                                                    | 0 | 1 | 1 | 0 | 0        |  | GO: |
| 0042311 | Vasodilation                                         |   |   |   |   |          |  |     |
| _01     | 6                                                    | 0 | 1 | 1 | 0 | 0        |  | GO: |
| 0042312 | Regulation_of_vasodilation                           |   |   |   |   |          |  |     |
| _01     | 6                                                    | 0 | 1 | 1 | 0 | 0        |  | GO: |
| 0042325 | Regulation_of_phosphorylation                        |   |   |   |   |          |  |     |
| _01     | 9                                                    | 0 | 1 | 1 | 0 | 0        |  | GO: |
| 0042326 | Negative_regulation_of_phosphorylation               |   |   |   |   |          |  |     |
| _01     | 7                                                    | 0 | 1 | 1 | 0 | 0        |  | GO: |
| 0042327 | Positive_regulation_of_phosphorylation               |   |   |   |   |          |  |     |
| _01     | 6                                                    | 0 | 1 | 1 | 0 | 0        |  | GO: |
| 0042346 | Positive_regulation_of_NF-kappaB_import_into_nucleus |   |   |   |   |          |  |     |
| _01     | 5                                                    | 0 | 1 | 1 | 0 | 0        |  | GO: |
| 0042355 | L-fucose_catabolic_process                           |   |   |   |   |          |  |     |
| _01     | 6                                                    | 0 | 1 | 1 | 0 | 0        |  | GO: |
| 0042359 | Vitamin_D_metabolic_process                          |   |   |   |   |          |  |     |
| _01     | 5                                                    | 0 | 1 | 1 | 0 | 0        |  | GO: |
| 0042382 | Paraspeckles                                         |   |   |   |   |          |  |     |
| _01     | 40                                                   | 0 | 1 | 1 | 0 | 0        |  | GO: |
| 0042383 | Sarcolemma                                           |   |   |   |   |          |  |     |
| _01     | 15                                                   | 0 | 1 | 1 | 0 | 0        |  | GO: |
| 0042384 | Cilium_assembly                                      |   |   |   |   |          |  |     |
| _01     | 17                                                   | 0 | 1 | 1 | 0 | 0        |  | GO: |
| 0042391 | Regulation_of_membrane_potential                     |   |   |   |   |          |  |     |
| _01     | 27                                                   | 0 | 1 | 1 | 0 | 0        |  | GO: |
| 0042393 | Histone_binding                                      |   |   |   |   |          |  |     |
| _01     | 7                                                    | 0 | 1 | 1 | 0 | 0        |  | GO: |
| 0042417 | Dopamine_metabolic_process                           |   |   |   |   |          |  |     |
| _01     | 10                                                   | 1 | 1 | 1 | 0 | 6.3e-05  |  | GO: |
| 0042445 | Hormone_metabolic_process                            |   |   |   |   |          |  |     |
| _01     | 37                                                   | 1 | 1 | 1 | 0 | 3.9e-05  |  | GO: |
| 0042446 | Hormone_biosynthetic_process                         |   |   |   |   |          |  |     |
| _01     | 10                                                   | 0 | 1 | 1 | 0 | 0        |  | GO: |
| 0042462 | Eye_photoreceptor_cell_development                   |   |   |   |   |          |  |     |
| _01     | 63                                                   | 0 | 1 | 1 | 0 | 0        |  | GO: |
| 0042470 | Melanosome                                           |   |   |   |   |          |  |     |
| _01     | 34                                                   | 0 | 1 | 1 | 0 | 0        |  | GO: |
| 0042472 | Inner_ear_morphogenesis                              |   |   |   |   |          |  |     |
| _01     | 12                                                   | 1 | 1 | 1 | 0 | 0.000339 |  | GO: |
| 0042474 | Middle_ear_morphogenesis                             |   |   |   |   |          |  |     |
| _01     | 21                                                   | 0 | 1 | 1 | 0 | 0        |  | GO: |
| 0042475 | Odontogenesis_of_dentine-containing_tooth            |   |   |   |   |          |  |     |
| _01     | 19                                                   | 0 | 1 | 1 | 0 | 0        |  | GO: |
| 0042476 | Odontogenesis                                        |   |   |   |   |          |  |     |
| _01     | 9                                                    | 0 | 1 | 1 | 0 | 0        |  | GO: |
| 0042491 | Auditory_receptor_cell_differentiation               |   |   |   |   |          |  |     |
| _01     | 173                                                  | 1 | 1 | 1 | 0 | 3.9e-05  |  | GO: |

|         |                                                                  |   |   |   |   |         |     |  |
|---------|------------------------------------------------------------------|---|---|---|---|---------|-----|--|
| 0042493 | Response_to_drug                                                 |   |   |   |   |         |     |  |
| _01     | 9                                                                | 0 | 1 | 1 | 0 | 0       | G0: |  |
| 0042517 | Positive_regulation_of_tyrosine_phosphorylation_of_Stat3_protein |   |   |   |   |         |     |  |
| _01     | 9                                                                | 0 | 1 | 1 | 0 | 0       | G0: |  |
| 0042523 | Positive_regulation_of_tyrosine_phosphorylation_of_Stat5_protein |   |   |   |   |         |     |  |
| _01     | 27                                                               | 0 | 1 | 1 | 0 | 0       | G0: |  |
| 0042542 | Response_to_hydrogen_peroxide                                    |   |   |   |   |         |     |  |
| _01     | 17                                                               | 0 | 1 | 1 | 0 | 0       | G0: |  |
| 0042552 | Myelination                                                      |   |   |   |   |         |     |  |
| _01     | 7                                                                | 0 | 1 | 1 | 0 | 0       | G0: |  |
| 0042554 | Superoxide_anion_generation                                      |   |   |   |   |         |     |  |
| _01     | 11                                                               | 0 | 1 | 1 | 0 | 0       | G0: |  |
| 0042562 | Hormone_binding                                                  |   |   |   |   |         |     |  |
| _01     | 6                                                                | 0 | 1 | 1 | 0 | 0       | G0: |  |
| 0042573 | Retinoic_acid_metabolic_process                                  |   |   |   |   |         |     |  |
| _01     | 5                                                                | 0 | 1 | 1 | 0 | 0       | G0: |  |
| 0042581 | Specific_granule                                                 |   |   |   |   |         |     |  |
| _01     | 5                                                                | 0 | 1 | 1 | 0 | 0       | G0: |  |
| 0042589 | Zymogen_granule_membrane                                         |   |   |   |   |         |     |  |
| _01     | 10                                                               | 0 | 1 | 1 | 0 | 0       | G0: |  |
| 0042592 | Homeostatic_process                                              |   |   |   |   |         |     |  |
| _01     | 34                                                               | 1 | 1 | 1 | 0 | 6.3e-05 | G0: |  |
| 0042593 | Glucose_homeostasis                                              |   |   |   |   |         |     |  |
| _01     | 7                                                                | 0 | 1 | 1 | 0 | 0       | G0: |  |
| 0042594 | Response_to_starvation                                           |   |   |   |   |         |     |  |
| _01     | 7                                                                | 0 | 1 | 1 | 0 | 0       | G0: |  |
| 0042605 | Peptide_antigen_binding                                          |   |   |   |   |         |     |  |
| _01     | 5                                                                | 0 | 1 | 1 | 0 | 0       | G0: |  |
| 0042612 | MHC_class_I_protein_complex                                      |   |   |   |   |         |     |  |
| _01     | 7                                                                | 0 | 1 | 1 | 0 | 0       | G0: |  |
| 0042623 | ATPase_activity,_coupled                                         |   |   |   |   |         |     |  |
| _01     | 18                                                               | 0 | 1 | 1 | 0 | 0       | G0: |  |
| 0042626 | ATPase_activity,_coupled_to_transmembrane_movement_of_substances |   |   |   |   |         |     |  |
| _01     | 9                                                                | 0 | 1 | 1 | 0 | 0       | G0: |  |
| 0042627 | Chylomicron                                                      |   |   |   |   |         |     |  |
| _01     | 28                                                               | 0 | 1 | 1 | 0 | 0       | G0: |  |
| 0042632 | Cholesterol_homeostasis                                          |   |   |   |   |         |     |  |
| _01     | 6                                                                | 1 | 1 | 1 | 0 | 3.9e-05 | G0: |  |
| 0042640 | Anagen                                                           |   |   |   |   |         |     |  |
| _01     | 24                                                               | 0 | 1 | 1 | 0 | 0       | G0: |  |
| 0042645 | Mitochondrial_nucleoid                                           |   |   |   |   |         |     |  |
| _01     | 7                                                                | 0 | 1 | 1 | 0 | 0       | G0: |  |
| 0042692 | Muscle_cell_differentiation                                      |   |   |   |   |         |     |  |
| _01     | 6                                                                | 0 | 1 | 1 | 0 | 0       | G0: |  |
| 0042698 | Ovulation_cycle                                                  |   |   |   |   |         |     |  |
| _01     | 7                                                                | 0 | 1 | 1 | 0 | 0       | G0: |  |
| 0042711 | Maternal_behavior                                                |   |   |   |   |         |     |  |
| _01     | 5                                                                | 0 | 1 | 1 | 0 | 0       | G0: |  |
| 0042713 | Sperm_ejaculation                                                |   |   |   |   |         |     |  |
| _01     | 9                                                                | 0 | 1 | 1 | 0 | 0       | G0: |  |
| 0042730 | Fibrinolysis                                                     |   |   |   |   |         |     |  |



|         |                                                                                                    |   |   |   |   |          |     |
|---------|----------------------------------------------------------------------------------------------------|---|---|---|---|----------|-----|
| _01     | 24                                                                                                 | 0 | 1 | 1 | 0 | 0        | G0: |
| 0042733 | Embryonic_digit_morphogenesis                                                                      |   |   |   |   |          | G0: |
| _01     | 30                                                                                                 | 0 | 1 | 1 | 0 | 0        | G0: |
| 0042734 | Presynaptic_membrane                                                                               |   |   |   |   |          | G0: |
| _01     | 51                                                                                                 | 0 | 1 | 1 | 0 | 0        | G0: |
| 0042742 | Defense_response_to_bacterium                                                                      |   |   |   |   |          | G0: |
| _01     | 10                                                                                                 | 0 | 1 | 1 | 0 | 0        | G0: |
| 0042744 | Hydrogen_peroxide_catabolic_process                                                                |   |   |   |   |          | G0: |
| _01     | 6                                                                                                  | 0 | 1 | 1 | 0 | 0        | G0: |
| 0042752 | Regulation_of_circadian_rhythm                                                                     |   |   |   |   |          | G0: |
| _01     | 19                                                                                                 | 0 | 1 | 1 | 0 | 0        | G0: |
| 0042755 | Eating_behavior                                                                                    |   |   |   |   |          | G0: |
| _01     | 6                                                                                                  | 0 | 1 | 1 | 0 | 0        | G0: |
| 0042756 | Drinking_behavior                                                                                  |   |   |   |   |          | G0: |
| _01     | 5                                                                                                  | 0 | 1 | 1 | 0 | 0        | G0: |
| 0042769 | DNA_damage_response,_detection_of_DNA_damage                                                       |   |   |   |   |          | G0: |
| _01     | 12                                                                                                 | 0 | 1 | 1 | 0 | 0        | G0: |
| 0042771 | DNA_damage_response,_signal_transduction_by_p53_class_mediator_resulting_in_induction_of_apoptosis |   |   |   |   |          | G0: |
| _01     | 9                                                                                                  | 0 | 1 | 1 | 0 | 0        | G0: |
| 0042776 | Mitochondrial_ATP_synthesis_coupled_proton_transport                                               |   |   |   |   |          | G0: |
| _01     | 11                                                                                                 | 0 | 1 | 1 | 0 | 0        | G0: |
| 0042787 | Protein_ubiquitination_involved_in_ubiquitin-dependent_protein_catabolic_process                   |   |   |   |   |          | G0: |
| _01     | 8                                                                                                  | 1 | 1 | 1 | 0 | 0.000423 | G0: |
| 0042800 | Histone_methyltransferase_activity_(H3-K4_specific)                                                |   |   |   |   |          | G0: |
| _01     | 216                                                                                                | 1 | 1 | 1 | 0 | 5e-05    | G0: |
| 0042802 | Identical_protein_binding                                                                          |   |   |   |   |          | G0: |
| _01     | 244                                                                                                | 1 | 1 | 1 | 0 | 6.9e-05  | G0: |
| 0042803 | Protein_homodimerization_activity                                                                  |   |   |   |   |          | G0: |
| _01     | 10                                                                                                 | 0 | 1 | 1 | 0 | 0        | G0: |
| 0042809 | Vitamin_D_receptor_binding                                                                         |   |   |   |   |          | G0: |
| _01     | 10                                                                                                 | 0 | 1 | 1 | 0 | 0        | G0: |
| 0042813 | Wnt_receptor_activity                                                                              |   |   |   |   |          | G0: |
| _01     | 28                                                                                                 | 0 | 1 | 1 | 0 | 0        | G0: |
| 0042826 | Histone_deacetylase_binding                                                                        |   |   |   |   |          | G0: |
| _01     | 5                                                                                                  | 0 | 1 | 1 | 0 | 0        | G0: |
| 0042832 | Defense_response_to_protozoan                                                                      |   |   |   |   |          | G0: |
| _01     | 5                                                                                                  | 0 | 1 | 1 | 0 | 0        | G0: |
| 0042921 | Glucocorticoid_receptor_signaling_pathway                                                          |   |   |   |   |          | G0: |
| _01     | 5                                                                                                  | 0 | 1 | 1 | 0 | 0        | G0: |
| 0042923 | Neuropeptide_binding                                                                               |   |   |   |   |          | G0: |
| _01     | 8                                                                                                  | 0 | 1 | 1 | 0 | 0        | G0: |
| 0042953 | Lipoprotein_transport                                                                              |   |   |   |   |          | G0: |
| _01     | 116                                                                                                | 0 | 1 | 1 | 0 | 0        | G0: |
| 0042981 | Regulation_of_apoptosis                                                                            |   |   |   |   |          | G0: |
| _01     | 5                                                                                                  | 0 | 1 | 1 | 0 | 0        | G0: |
| 0042994 | Cytoplasmic_sequestering_of_transcription_factor                                                   |   |   |   |   |          | G0: |
| _01     | 70                                                                                                 | 0 | 1 | 1 | 0 | 0        | G0: |
| 0042995 | Cell_projection                                                                                    |   |   |   |   |          | G0: |
| _01     | 43                                                                                                 | 0 | 1 | 1 | 0 | 0        | G0: |
| 0043005 | Neuron_projection                                                                                  |   |   |   |   |          | G0: |
| _01     | 18                                                                                                 | 0 | 1 | 1 | 0 | 0        | G0: |

|         |                                                           |   |   |   |   |         |  |     |
|---------|-----------------------------------------------------------|---|---|---|---|---------|--|-----|
| 0043010 | Camera-type_eye_development                               |   |   |   |   |         |  |     |
| _01     | 5                                                         | 0 | 1 | 1 | 0 | 0       |  | G0: |
| 0043011 | Myeloid_dendritic_cell_differentiation                    |   |   |   |   |         |  |     |
| _01     | 5                                                         | 0 | 1 | 1 | 0 | 0       |  | G0: |
| 0043015 | Gamma-tubulin_binding                                     |   |   |   |   |         |  |     |
| _01     | 6                                                         | 0 | 1 | 1 | 0 | 0       |  | G0: |
| 0043020 | NADPH_oxidase_complex                                     |   |   |   |   |         |  |     |
| _01     | 8                                                         | 0 | 1 | 1 | 0 | 0       |  | G0: |
| 0043021 | Ribonucleoprotein_binding                                 |   |   |   |   |         |  |     |
| _01     | 12                                                        | 0 | 1 | 1 | 0 | 0       |  | G0: |
| 0043022 | Ribosome_binding                                          |   |   |   |   |         |  |     |
| _01     | 96                                                        | 0 | 1 | 1 | 0 | 0       |  | G0: |
| 0043025 | Neuronal_cell_body                                        |   |   |   |   |         |  |     |
| _01     | 6                                                         | 0 | 1 | 1 | 0 | 0       |  | G0: |
| 0043027 | Caspase_inhibitor_activity                                |   |   |   |   |         |  |     |
| _01     | 9                                                         | 0 | 1 | 1 | 0 | 0       |  | G0: |
| 0043029 | T_cell_homeostasis                                        |   |   |   |   |         |  |     |
| _01     | 9                                                         | 0 | 1 | 1 | 0 | 0       |  | G0: |
| 0043034 | Costamere                                                 |   |   |   |   |         |  |     |
| _01     | 5                                                         | 0 | 1 | 1 | 0 | 0       |  | G0: |
| 0043043 | Peptide_biosynthetic_process                              |   |   |   |   |         |  |     |
| _01     | 7                                                         | 0 | 1 | 1 | 0 | 0       |  | G0: |
| 0043046 | DNA_methylation_involved_in_gamete_generation             |   |   |   |   |         |  |     |
| _01     | 90                                                        | 1 | 1 | 1 | 0 | 3.9e-05 |  | G0: |
| 0043065 | Positive_regulation_of_apoptosis                          |   |   |   |   |         |  |     |
| _01     | 102                                                       | 0 | 1 | 1 | 0 | 0       |  | G0: |
| 0043066 | Negative_regulation_of_apoptosis                          |   |   |   |   |         |  |     |
| _01     | 5                                                         | 0 | 1 | 1 | 0 | 0       |  | G0: |
| 0043069 | Negative_regulation_of_programmed_cell_death              |   |   |   |   |         |  |     |
| _01     | 9                                                         | 0 | 1 | 1 | 0 | 0       |  | G0: |
| 0043085 | Positive_regulation_of_catalytic_activity                 |   |   |   |   |         |  |     |
| _01     | 6                                                         | 0 | 1 | 1 | 0 | 0       |  | G0: |
| 0043087 | Regulation_of_GTPase_activity                             |   |   |   |   |         |  |     |
| _01     | 9                                                         | 0 | 1 | 1 | 0 | 0       |  | G0: |
| 0043101 | Purine-containing_compound_salvage                        |   |   |   |   |         |  |     |
| _01     | 6                                                         | 0 | 1 | 1 | 0 | 0       |  | G0: |
| 0043113 | Receptor_clustering                                       |   |   |   |   |         |  |     |
| _01     | 80                                                        | 0 | 1 | 1 | 0 | 0       |  | G0: |
| 0043123 | Positive_regulation_of_I-kappaB_kinase/NF-kappaB_cascade  |   |   |   |   |         |  |     |
| _01     | 6                                                         | 0 | 1 | 1 | 0 | 0       |  | G0: |
| 0043124 | Negative_regulation_of_I-kappaB_kinase/NF-kappaB_cascade  |   |   |   |   |         |  |     |
| _01     | 5                                                         | 0 | 1 | 1 | 0 | 0       |  | G0: |
| 0043129 | Surfactant_homeostasis                                    |   |   |   |   |         |  |     |
| _01     | 16                                                        | 0 | 1 | 1 | 0 | 0       |  | G0: |
| 0043130 | Ubiquitin_binding                                         |   |   |   |   |         |  |     |
| _01     | 5                                                         | 0 | 1 | 1 | 0 | 0       |  | G0: |
| 0043149 | Stress_fiber_assembly                                     |   |   |   |   |         |  |     |
| _01     | 13                                                        | 0 | 1 | 1 | 0 | 0       |  | G0: |
| 0043154 | Negative_regulation_of_caspase_activity                   |   |   |   |   |         |  |     |
| _01     | 30                                                        | 0 | 1 | 1 | 0 | 0       |  | G0: |
| 0043161 | Proteasomal_ubiquitin-dependent_protein_catabolic_process |   |   |   |   |         |  |     |
| _01     | 16                                                        | 0 | 1 | 1 | 0 | 0       |  | G0: |
| 0043169 | Cation_binding                                            |   |   |   |   |         |  |     |
| _01     | 5                                                         | 0 | 1 | 1 | 0 | 0       |  | G0: |

|         |                                                    |   |         |          |   |          |     |  |
|---------|----------------------------------------------------|---|---------|----------|---|----------|-----|--|
| 0043186 | P_granule                                          |   |         |          |   |          |     |  |
| _01     | 5                                                  | 0 | 1       | 1        | 0 | 0        | G0: |  |
| 0043190 | ATP-binding_cassette_(ABC)_transporter_complex     |   |         |          |   |          |     |  |
| _01     | 43                                                 | 0 | 1       | 1        | 0 | 0        | G0: |  |
| 0043193 | Positive_regulation_of_gene-specific_transcription |   |         |          |   |          |     |  |
| _01     | 21                                                 | 0 | 1       | 1        | 0 | 0        | G0: |  |
| 0043195 | Terminal_button                                    |   |         |          |   |          |     |  |
| _01     | 29                                                 | 0 | 1       | 1        | 0 | 0        | G0: |  |
| 0043197 | Dendritic_spine                                    |   |         |          |   |          |     |  |
| _01     | 10                                                 | 0 | 1       | 1        | 0 | 0        | G0: |  |
| 0043198 | Dendritic_shaft                                    |   |         |          |   |          |     |  |
| _01     | 15                                                 | 0 | 1       | 1        | 0 | 0        | G0: |  |
| 0043200 | Response_to_amino_acid_stimulus                    |   |         |          |   |          |     |  |
| _01     | 5                                                  | 0 | 1       | 1        | 0 | 0        | G0: |  |
| 0043202 | Lysosomal_lumen                                    |   |         |          |   |          |     |  |
| _01     | 22                                                 | 0 | 1       | 1        | 0 | 0        | G0: |  |
| 0043204 | Perikaryon                                         |   |         |          |   |          |     |  |
| _01     | 5                                                  | 0 | 1       | 1        | 0 | 0        | G0: |  |
| 0043206 | Fibril_organization                                |   |         |          |   |          |     |  |
| _01     | 6                                                  | 0 | 1       | 1        | 0 | 0        | G0: |  |
| 0043208 | Glycosphingolipid_binding                          |   |         |          |   |          |     |  |
| _01     | 6                                                  | 0 | 1       | 1        | 0 | 0        | G0: |  |
| 0043209 | Myelin_sheath                                      |   |         |          |   |          |     |  |
| _01     | 130                                                | 0 | 1       | 1        | 0 | 0        | G0: |  |
| 0043231 | Intracellular_membrane-bounded_organelle           |   |         |          |   |          |     |  |
| _01     | 112                                                | 2 | 0.00452 | 0.352829 | 0 | 0.000189 | G0: |  |
| 0043234 | Protein_complex                                    |   |         |          |   |          |     |  |
| _01     | 12                                                 | 0 | 1       | 1        | 0 | 0        | G0: |  |
| 0043235 | Receptor_complex                                   |   |         |          |   |          |     |  |
| _01     | 8                                                  | 0 | 1       | 1        | 0 | 0        | G0: |  |
| 0043236 | Laminin_binding                                    |   |         |          |   |          |     |  |
| _01     | 7                                                  | 0 | 1       | 1        | 0 | 0        | G0: |  |
| 0043252 | Sodium-independent_organic_anion_transport         |   |         |          |   |          |     |  |
| _01     | 5                                                  | 0 | 1       | 1        | 0 | 0        | G0: |  |
| 0043277 | Apoptotic_cell_clearance                           |   |         |          |   |          |     |  |
| _01     | 13                                                 | 0 | 1       | 1        | 0 | 0        | G0: |  |
| 0043278 | Response_to_morphine                               |   |         |          |   |          |     |  |
| _01     | 9                                                  | 0 | 1       | 1        | 0 | 0        | G0: |  |
| 0043280 | Positive_regulation_of_caspase_activity            |   |         |          |   |          |     |  |
| _01     | 6                                                  | 0 | 1       | 1        | 0 | 0        | G0: |  |
| 0043292 | Contractile_fiber                                  |   |         |          |   |          |     |  |
| _01     | 5                                                  | 0 | 1       | 1        | 0 | 0        | G0: |  |
| 0043306 | Positive_regulation_of_mast_cell_degranulation     |   |         |          |   |          |     |  |
| _01     | 8                                                  | 0 | 1       | 1        | 0 | 0        | G0: |  |
| 0043325 | Phosphatidylinositol-3,4-bisphosphate_binding      |   |         |          |   |          |     |  |
| _01     | 7                                                  | 0 | 1       | 1        | 0 | 0        | G0: |  |
| 0043330 | Response_to_exogenous_dsRNA                        |   |         |          |   |          |     |  |
| _01     | 9                                                  | 0 | 1       | 1        | 0 | 0        | G0: |  |
| 0043388 | Positive_regulation_of_DNA_binding                 |   |         |          |   |          |     |  |
| _01     | 8                                                  | 0 | 1       | 1        | 0 | 0        | G0: |  |
| 0043392 | Negative_regulation_of_DNA_binding                 |   |         |          |   |          |     |  |
| _01     | 6                                                  | 0 | 1       | 1        | 0 | 0        | G0: |  |
| 0043393 | Regulation_of_protein_binding                      |   |         |          |   |          |     |  |
| _01     | 7                                                  | 0 | 1       | 1        | 0 | 0        | G0: |  |

|         |                                                                                       |   |   |   |   |   |  |  |     |
|---------|---------------------------------------------------------------------------------------|---|---|---|---|---|--|--|-----|
| 0043395 | Heparan_sulfate_proteoglycan_binding                                                  |   |   |   |   |   |  |  |     |
| _01     | 7                                                                                     | 0 | 1 | 1 | 0 | 0 |  |  | GO: |
| 0043403 | Skeletal_muscle_tissue_regeneration                                                   |   |   |   |   |   |  |  |     |
| _01     | 14                                                                                    | 0 | 1 | 1 | 0 | 0 |  |  | GO: |
| 0043406 | Positive_regulation_of_MAP_kinase_activity                                            |   |   |   |   |   |  |  |     |
| _01     | 17                                                                                    | 0 | 1 | 1 | 0 | 0 |  |  | GO: |
| 0043407 | Negative_regulation_of_MAP_kinase_activity                                            |   |   |   |   |   |  |  |     |
| _01     | 5                                                                                     | 0 | 1 | 1 | 0 | 0 |  |  | GO: |
| 0043408 | Regulation_of_MAPKKK_cascade                                                          |   |   |   |   |   |  |  |     |
| _01     | 8                                                                                     | 0 | 1 | 1 | 0 | 0 |  |  | GO: |
| 0043409 | Negative_regulation_of_MAPKKK_cascade                                                 |   |   |   |   |   |  |  |     |
| _01     | 31                                                                                    | 0 | 1 | 1 | 0 | 0 |  |  | GO: |
| 0043410 | Positive_regulation_of_MAPKKK_cascade                                                 |   |   |   |   |   |  |  |     |
| _01     | 26                                                                                    | 0 | 1 | 1 | 0 | 0 |  |  | GO: |
| 0043433 | Negative_regulation_of_transcription_factor_activity                                  |   |   |   |   |   |  |  |     |
| _01     | 40                                                                                    | 0 | 1 | 1 | 0 | 0 |  |  | GO: |
| 0043434 | Response_to_peptide_hormone_stimulus                                                  |   |   |   |   |   |  |  |     |
| _01     | 13                                                                                    | 0 | 1 | 1 | 0 | 0 |  |  | GO: |
| 0043473 | Pigmentation                                                                          |   |   |   |   |   |  |  |     |
| _01     | 9                                                                                     | 0 | 1 | 1 | 0 | 0 |  |  | GO: |
| 0043484 | Regulation_of_RNA_splicing                                                            |   |   |   |   |   |  |  |     |
| _01     | 6                                                                                     | 0 | 1 | 1 | 0 | 0 |  |  | GO: |
| 0043488 | Regulation_of_mRNA_stability                                                          |   |   |   |   |   |  |  |     |
| _01     | 8                                                                                     | 0 | 1 | 1 | 0 | 0 |  |  | GO: |
| 0043491 | Protein_kinase_B_signaling_cascade                                                    |   |   |   |   |   |  |  |     |
| _01     | 10                                                                                    | 0 | 1 | 1 | 0 | 0 |  |  | GO: |
| 0043498 | Cell_surface_binding                                                                  |   |   |   |   |   |  |  |     |
| _01     | 11                                                                                    | 0 | 1 | 1 | 0 | 0 |  |  | GO: |
| 0043499 | Eukaryotic_cell_surface_binding                                                       |   |   |   |   |   |  |  |     |
| _01     | 13                                                                                    | 0 | 1 | 1 | 0 | 0 |  |  | GO: |
| 0043507 | Positive_regulation_of_JUN_kinase_activity                                            |   |   |   |   |   |  |  |     |
| _01     | 5                                                                                     | 0 | 1 | 1 | 0 | 0 |  |  | GO: |
| 0043508 | Negative_regulation_of_JUN_kinase_activity                                            |   |   |   |   |   |  |  |     |
| _01     | 5                                                                                     | 0 | 1 | 1 | 0 | 0 |  |  | GO: |
| 0043518 | Negative_regulation_of_DNA_damage_response,_signal_transduction_by_p53_class_mediator |   |   |   |   |   |  |  |     |
| _01     | 38                                                                                    | 0 | 1 | 1 | 0 | 0 |  |  | GO: |
| 0043524 | Negative_regulation_of_neuron_apoptosis                                               |   |   |   |   |   |  |  |     |
| _01     | 13                                                                                    | 0 | 1 | 1 | 0 | 0 |  |  | GO: |
| 0043525 | Positive_regulation_of_neuron_apoptosis                                               |   |   |   |   |   |  |  |     |
| _01     | 12                                                                                    | 0 | 1 | 1 | 0 | 0 |  |  | GO: |
| 0043526 | Neuroprotection                                                                       |   |   |   |   |   |  |  |     |
| _01     | 11                                                                                    | 0 | 1 | 1 | 0 | 0 |  |  | GO: |
| 0043531 | ADP_binding                                                                           |   |   |   |   |   |  |  |     |
| _01     | 7                                                                                     | 0 | 1 | 1 | 0 | 0 |  |  | GO: |
| 0043534 | Blood_vessel_endothelial_cell_migration                                               |   |   |   |   |   |  |  |     |
| _01     | 7                                                                                     | 0 | 1 | 1 | 0 | 0 |  |  | GO: |
| 0043536 | Positive_regulation_of_blood_vessel_endothelial_cell_migration                        |   |   |   |   |   |  |  |     |
| _01     | 5                                                                                     | 0 | 1 | 1 | 0 | 0 |  |  | GO: |
| 0043537 | Negative_regulation_of_blood_vessel_endothelial_cell_migration                        |   |   |   |   |   |  |  |     |
| _01     | 8                                                                                     | 0 | 1 | 1 | 0 | 0 |  |  | GO: |

|            |                                                                                                     |   |          |          |   |             |   |     |
|------------|-----------------------------------------------------------------------------------------------------|---|----------|----------|---|-------------|---|-----|
| 0043542    | Endothelial_cell_migration                                                                          |   |          |          |   |             |   |     |
| _01        | 7                                                                                                   | 0 | 1        | 1        | 0 | 0           | 0 | GO: |
| 0043548    | Phosphoinositide_3-kinase_binding                                                                   |   |          |          |   |             |   |     |
| _01        | 8                                                                                                   | 0 | 1        | 1        | 0 | 0           | 0 | GO: |
| 0043560    | Insulin_receptor_substrate_binding                                                                  |   |          |          |   |             |   |     |
| _01        | 321                                                                                                 | 3 | 0.001001 | 0.168941 | 0 | 0.000160667 | 0 |     |
| G0:0043565 | Sequence-specific_DNA_binding                                                                       |   |          |          |   |             |   |     |
| _01        | 5                                                                                                   | 0 | 1        | 1        | 0 | 0           | 0 | GO: |
| 0043568    | Positive_regulation_of_insulin-like_growth_factor_receptor_signaling_pathway                        |   |          |          |   |             |   |     |
| _01        | 5                                                                                                   | 1 | 1        | 1        | 0 | 0.000339    | 0 | GO: |
| 0043583    | Ear_development                                                                                     |   |          |          |   |             |   |     |
| _01        | 5                                                                                                   | 0 | 1        | 1        | 0 | 0           | 0 | GO: |
| 0043586    | Tongue_development                                                                                  |   |          |          |   |             |   |     |
| _01        | 5                                                                                                   | 0 | 1        | 1        | 0 | 0           | 0 | GO: |
| 0043587    | Tongue_morphogenesis                                                                                |   |          |          |   |             |   |     |
| _01        | 18                                                                                                  | 0 | 1        | 1        | 0 | 0           | 0 | GO: |
| 0043588    | Skin_development                                                                                    |   |          |          |   |             |   |     |
| _01        | 10                                                                                                  | 0 | 1        | 1        | 0 | 0           | 0 | GO: |
| 0043616    | Keratinocyte_proliferation                                                                          |   |          |          |   |             |   |     |
| _01        | 8                                                                                                   | 0 | 1        | 1        | 0 | 0           | 0 | GO: |
| 0043621    | Protein_self-association                                                                            |   |          |          |   |             |   |     |
| _01        | 36                                                                                                  | 0 | 1        | 1        | 0 | 0           | 0 | GO: |
| 0043627    | Response_to_estrogen_stimulus                                                                       |   |          |          |   |             |   |     |
| _01        | 9                                                                                                   | 0 | 1        | 1        | 0 | 0           | 0 | GO: |
| 0043679    | Axon_terminus                                                                                       |   |          |          |   |             |   |     |
| _01        | 74                                                                                                  | 0 | 1        | 1        | 0 | 0           | 0 | GO: |
| 0043687    | Post-translational_protein_modification                                                             |   |          |          |   |             |   |     |
| _01        | 11                                                                                                  | 0 | 1        | 1        | 0 | 0           | 0 | GO: |
| 0043691    | Reverse_cholesterol_transport                                                                       |   |          |          |   |             |   |     |
| _01        | 18                                                                                                  | 0 | 1        | 1        | 0 | 0           | 0 | GO: |
| 0043928    | Exonucleolytic_nuclear-transcribed_mRNA_catabolic_process_involved_in_deadenylation-dependent_decay |   |          |          |   |             |   |     |
| _01        | 24                                                                                                  | 0 | 1        | 1        | 0 | 0           | 0 | GO: |
| 0043966    | Histone_H3_acetylation                                                                              |   |          |          |   |             |   |     |
| _01        | 13                                                                                                  | 0 | 1        | 1        | 0 | 0           | 0 | GO: |
| 0043967    | Histone_H4_acetylation                                                                              |   |          |          |   |             |   |     |
| _01        | 10                                                                                                  | 0 | 1        | 1        | 0 | 0           | 0 | GO: |
| 0043968    | Histone_H2A_acetylation                                                                             |   |          |          |   |             |   |     |
| _01        | 5                                                                                                   | 0 | 1        | 1        | 0 | 0           | 0 | GO: |
| 0043983    | Histone_H4-K12_acetylation                                                                          |   |          |          |   |             |   |     |
| _01        | 8                                                                                                   | 0 | 1        | 1        | 0 | 0           | 0 | GO: |
| 0043984    | Histone_H4-K16_acetylation                                                                          |   |          |          |   |             |   |     |
| _01        | 9                                                                                                   | 0 | 1        | 1        | 0 | 0           | 0 | GO: |
| 0044130    | Negative_regulation_of_growth_of_symbiont_in_host                                                   |   |          |          |   |             |   |     |
| _01        | 11                                                                                                  | 0 | 1        | 1        | 0 | 0           | 0 | GO: |
| 0044237    | Cellular_metabolic_process                                                                          |   |          |          |   |             |   |     |
| _01        | 76                                                                                                  | 0 | 1        | 1        | 0 | 0           | 0 | GO: |
| 0044255    | Cellular_lipid_metabolic_process                                                                    |   |          |          |   |             |   |     |
| _01        | 7                                                                                                   | 0 | 1        | 1        | 0 | 0           | 0 | GO: |
| 0044262    | Cellular_carbohydrate_metabolic_process                                                             |   |          |          |   |             |   |     |
| _01        | 151                                                                                                 | 0 | 1        | 1        | 0 | 0           | 0 | GO: |
| 0044267    | Cellular_protein_metabolic_process                                                                  |   |          |          |   |             |   |     |

|         |                                                              |   |          |          |   |          |     |
|---------|--------------------------------------------------------------|---|----------|----------|---|----------|-----|
| _01     | 180                                                          | 1 | 1        | 1        | 0 | 7.4e-05  | G0: |
| 0044419 | Interspecies_interaction_between_organisms                   |   |          |          |   |          |     |
| _01     | 6                                                            | 0 | 1        | 1        | 0 | 0        | G0: |
| 0044424 | Intracellular_part                                           |   |          |          |   |          |     |
| _01     | 6                                                            | 0 | 1        | 1        | 0 | 0        | G0: |
| 0044428 | Nuclear_part                                                 |   |          |          |   |          |     |
| _01     | 5                                                            | 0 | 1        | 1        | 0 | 0        | G0: |
| 0044444 | Cytoplasmic_part                                             |   |          |          |   |          |     |
| _01     | 6                                                            | 0 | 1        | 1        | 0 | 0        | G0: |
| 0045022 | Early_endosome_to_late_endosome_transport                    |   |          |          |   |          |     |
| _01     | 15                                                           | 0 | 1        | 1        | 0 | 0        | G0: |
| 0045028 | Purinergic_nucleotide_receptor_activity,_G-protein_coupled   |   |          |          |   |          |     |
| _01     | 5                                                            | 0 | 1        | 1        | 0 | 0        | G0: |
| 0045055 | Regulated_secretory_pathway                                  |   |          |          |   |          |     |
| _01     | 6                                                            | 0 | 1        | 1        | 0 | 0        | G0: |
| 0045059 | Positive_thymic_T_cell_selection                             |   |          |          |   |          |     |
| _01     | 8                                                            | 0 | 1        | 1        | 0 | 0        | G0: |
| 0045060 | Negative_thymic_T_cell_selection                             |   |          |          |   |          |     |
| _01     | 7                                                            | 0 | 1        | 1        | 0 | 0        | G0: |
| 0045078 | Positive_regulation_of_interferon-gamma_biosynthetic_process |   |          |          |   |          |     |
| _01     | 6                                                            | 0 | 1        | 1        | 0 | 0        | G0: |
| 0045084 | Positive_regulation_of_interleukin-12_biosynthetic_process   |   |          |          |   |          |     |
| _01     | 7                                                            | 0 | 1        | 1        | 0 | 0        | G0: |
| 0045086 | Positive_regulation_of_interleukin-2_biosynthetic_process    |   |          |          |   |          |     |
| _01     | 125                                                          | 0 | 1        | 1        | 0 | 0        | G0: |
| 0045087 | Innate_immune_response                                       |   |          |          |   |          |     |
| _01     | 9                                                            | 0 | 1        | 1        | 0 | 0        | G0: |
| 0045089 | Positive_regulation_of_innate_immune_response                |   |          |          |   |          |     |
| _01     | 31                                                           | 0 | 1        | 1        | 0 | 0        | G0: |
| 0045095 | Keratin_filament                                             |   |          |          |   |          |     |
| _01     | 6                                                            | 0 | 1        | 1        | 0 | 0        | G0: |
| 0045109 | Intermediate_filament_organization                           |   |          |          |   |          |     |
| _01     | 20                                                           | 0 | 1        | 1        | 0 | 0        | G0: |
| 0045111 | Intermediate_filament_cytoskeleton                           |   |          |          |   |          |     |
| _01     | 7                                                            | 0 | 1        | 1        | 0 | 0        | G0: |
| 0045116 | Protein_neddylation                                          |   |          |          |   |          |     |
| _01     | 5                                                            | 0 | 1        | 1        | 0 | 0        | G0: |
| 0045120 | Pronucleus                                                   |   |          |          |   |          |     |
| _01     | 74                                                           | 0 | 1        | 1        | 0 | 0        | G0: |
| 0045121 | Membrane_raft                                                |   |          |          |   |          |     |
| _01     | 19                                                           | 0 | 1        | 1        | 0 | 0        | G0: |
| 0045165 | Cell_fate_commitment                                         |   |          |          |   |          |     |
| _01     | 5                                                            | 0 | 1        | 1        | 0 | 0        | G0: |
| 0045176 | Apical_protein_localization                                  |   |          |          |   |          |     |
| _01     | 25                                                           | 0 | 1        | 1        | 0 | 0        | G0: |
| 0045177 | Apical_part_of_cell                                          |   |          |          |   |          |     |
| _01     | 13                                                           | 0 | 1        | 1        | 0 | 0        | G0: |
| 0045182 | Translation_regulator_activity                               |   |          |          |   |          |     |
| _01     | 9                                                            | 0 | 1        | 1        | 0 | 0        | G0: |
| 0045184 | Establishment_of_protein_localization                        |   |          |          |   |          |     |
| _01     | 5                                                            | 0 | 1        | 1        | 0 | 0        | G0: |
| 0045190 | Isotype_switching                                            |   |          |          |   |          |     |
| _01     | 180                                                          | 2 | 0.037092 | 0.676482 | 0 | 4.55e-05 | G0: |
| 0045202 | Synapse                                                      |   |          |          |   |          |     |

|           |                                                           |   |           |   |          |         |     |
|-----------|-----------------------------------------------------------|---|-----------|---|----------|---------|-----|
| _01       | 110                                                       | 0 | 1         | 1 | 0        | 0       | G0: |
| 0045211   | Postsynaptic_membrane                                     |   |           |   |          |         |     |
| _01       | 8                                                         | 0 | 1         | 1 | 0        | 0       | G0: |
| 0045214   | Sarcomere_organization                                    |   |           |   |          |         |     |
| _01       | 38                                                        | 0 | 1         | 1 | 0        | 0       | G0: |
| 0045216   | Cell-cell_junction_organization                           |   |           |   |          |         |     |
| _01       | 6                                                         | 0 | 1         | 1 | 0        | 0       | G0: |
| 0045294   | Alpha-catenin_binding                                     |   |           |   |          |         |     |
| _01       | 8                                                         | 0 | 1         | 1 | 0        | 0       | G0: |
| 0045295   | Gamma-catenin_binding                                     |   |           |   |          |         |     |
| _01       | 19                                                        | 0 | 1         | 1 | 0        | 0       | G0: |
| 0045296   | Cadherin_binding                                          |   |           |   |          |         |     |
| _01       | 6                                                         | 0 | 1         | 1 | 0        | 0       | G0: |
| 0045333   | Cellular_respiration                                      |   |           |   |          |         |     |
| _01       | 5                                                         | 0 | 1         | 1 | 0        | 0       | G0: |
| 0045348   | Positive_regulation_of_MHC_class_II_biosynthetic_process  |   |           |   |          |         |     |
| _01       | 5                                                         | 0 | 1         | 1 | 0        | 0       | G0: |
| 0045410   | Positive_regulation_of_interleukin-6_biosynthetic_process |   |           |   |          |         |     |
| _01       | 15                                                        | 1 | 1         | 1 | 0        | 3.9e-05 | G0: |
| 0045429   | Positive_regulation_of_nitric_oxide_biosynthetic_process  |   |           |   |          |         |     |
| _01       | 19                                                        | 0 | 1         | 1 | 0        | 0       | G0: |
| 0045444   | Fat_cell_differentiation                                  |   |           |   |          |         |     |
| _01       | 11                                                        | 0 | 1         | 1 | 0        | 0       | G0: |
| 0045445   | Myoblast_differentiation                                  |   |           |   |          |         |     |
| _01       | 6                                                         | 0 | 1         | 1 | 0        | 0       | G0: |
| 0045446   | Endothelial_cell_differentiation                          |   |           |   |          |         |     |
| _01       | 585                                                       | 2 | 0.0647219 |   | 0.738657 | 0       |     |
| 0.0003835 | G0:0045449 Regulation_of_transcription                    |   |           |   |          |         |     |
| _01       | 12                                                        | 0 | 1         | 1 | 0        | 0       | G0: |
| 0045453   | Bone_resorption                                           |   |           |   |          |         |     |
| _01       | 47                                                        | 0 | 1         | 1 | 0        | 0       | G0: |
| 0045454   | Cell_redox_homeostasis                                    |   |           |   |          |         |     |
| _01       | 42                                                        | 0 | 1         | 1 | 0        | 0       | G0: |
| 0045471   | Response_to_ethanol                                       |   |           |   |          |         |     |
| _01       | 15                                                        | 0 | 1         | 1 | 0        | 0       | G0: |
| 0045494   | Photoreceptor_cell_maintenance                            |   |           |   |          |         |     |
| _01       | 5                                                         | 0 | 1         | 1 | 0        | 0       | G0: |
| 0045499   | Chemorepellent_activity                                   |   |           |   |          |         |     |
| _01       | 5                                                         | 0 | 1         | 1 | 0        | 0       | G0: |
| 0045588   | Positive_regulation_of_gamma-delta_T_cell_differentiation |   |           |   |          |         |     |
| _01       | 10                                                        | 0 | 1         | 1 | 0        | 0       | G0: |
| 0045595   | Regulation_of_cell_differentiation                        |   |           |   |          |         |     |
| _01       | 13                                                        | 0 | 1         | 1 | 0        | 0       | G0: |
| 0045596   | Negative_regulation_of_cell_differentiation               |   |           |   |          |         |     |
| _01       | 13                                                        | 0 | 1         | 1 | 0        | 0       | G0: |
| 0045597   | Positive_regulation_of_cell_differentiation               |   |           |   |          |         |     |
| _01       | 10                                                        | 0 | 1         | 1 | 0        | 0       | G0: |
| 0045599   | Negative_regulation_of_fat_cell_differentiation           |   |           |   |          |         |     |
| _01       | 9                                                         | 0 | 1         | 1 | 0        | 0       | G0: |
| 0045600   | Positive_regulation_of_fat_cell_differentiation           |   |           |   |          |         |     |
| _01       | 5                                                         | 0 | 1         | 1 | 0        | 0       | G0: |
| 0045647   | Negative_regulation_of_erythrocyte_differentiation        |   |           |   |          |         |     |
| _01       | 10                                                        | 0 | 1         | 1 | 0        | 0       | G0: |
| 0045648   | Positive_regulation_of_erythrocyte_differentiation        |   |           |   |          |         |     |

|         |                                                                             |   |   |   |   |         |     |
|---------|-----------------------------------------------------------------------------|---|---|---|---|---------|-----|
| _01     | 5                                                                           | 0 | 1 | 1 | 0 | 0       | G0: |
| 0045651 | Positive_regulation_of_macrophage_differentiation                           |   |   |   |   |         |     |
| _01     | 6                                                                           | 0 | 1 | 1 | 0 | 0       | G0: |
| 0045662 | Negative_regulation_of_myoblast_differentiation                             |   |   |   |   |         |     |
| _01     | 5                                                                           | 0 | 1 | 1 | 0 | 0       | G0: |
| 0045663 | Positive_regulation_of_myoblast_differentiation                             |   |   |   |   |         |     |
| _01     | 12                                                                          | 0 | 1 | 1 | 0 | 0       | G0: |
| 0045664 | Regulation_of_neuron_differentiation                                        |   |   |   |   |         |     |
| _01     | 18                                                                          | 0 | 1 | 1 | 0 | 0       | G0: |
| 0045665 | Negative_regulation_of_neuron_differentiation                               |   |   |   |   |         |     |
| _01     | 22                                                                          | 1 | 1 | 1 | 0 | 6.3e-05 | G0: |
| 0045666 | Positive_regulation_of_neuron_differentiation                               |   |   |   |   |         |     |
| _01     | 6                                                                           | 0 | 1 | 1 | 0 | 0       | G0: |
| 0045667 | Regulation_of_osteoblast_differentiation                                    |   |   |   |   |         |     |
| _01     | 9                                                                           | 0 | 1 | 1 | 0 | 0       | G0: |
| 0045668 | Negative_regulation_of_osteoblast_differentiation                           |   |   |   |   |         |     |
| _01     | 21                                                                          | 0 | 1 | 1 | 0 | 0       | G0: |
| 0045669 | Positive_regulation_of_osteoblast_differentiation                           |   |   |   |   |         |     |
| _01     | 10                                                                          | 0 | 1 | 1 | 0 | 0       | G0: |
| 0045671 | Negative_regulation_of_osteoclast_differentiation                           |   |   |   |   |         |     |
| _01     | 6                                                                           | 0 | 1 | 1 | 0 | 0       | G0: |
| 0045672 | Positive_regulation_of_osteoclast_differentiation                           |   |   |   |   |         |     |
| _01     | 6                                                                           | 0 | 1 | 1 | 0 | 0       | G0: |
| 0045723 | Positive_regulation_of_fatty_acid_biosynthetic_process                      |   |   |   |   |         |     |
| _01     | 9                                                                           | 0 | 1 | 1 | 0 | 0       | G0: |
| 0045725 | Positive_regulation_of_glycogen_biosynthetic_process                        |   |   |   |   |         |     |
| _01     | 18                                                                          | 0 | 1 | 1 | 0 | 0       | G0: |
| 0045727 | Positive_regulation_of_translation                                          |   |   |   |   |         |     |
| _01     | 5                                                                           | 0 | 1 | 1 | 0 | 0       | G0: |
| 0045730 | Respiratory_burst                                                           |   |   |   |   |         |     |
| _01     | 11                                                                          | 0 | 1 | 1 | 0 | 0       | G0: |
| 0045732 | Positive_regulation_of_protein_catabolic_process                            |   |   |   |   |         |     |
| _01     | 11                                                                          | 0 | 1 | 1 | 0 | 0       | G0: |
| 0045736 | Negative_regulation_of_cyclin-dependent_protein_kinase_activity             |   |   |   |   |         |     |
| _01     | 10                                                                          | 0 | 1 | 1 | 0 | 0       | G0: |
| 0045739 | Positive_regulation_of_DNA_repair                                           |   |   |   |   |         |     |
| _01     | 25                                                                          | 0 | 1 | 1 | 0 | 0       | G0: |
| 0045740 | Positive_regulation_of_DNA_replication                                      |   |   |   |   |         |     |
| _01     | 5                                                                           | 0 | 1 | 1 | 0 | 0       | G0: |
| 0045745 | Positive_regulation_of_G-protein_coupled_receptor_protein_signaling_pathway |   |   |   |   |         |     |
| _01     | 5                                                                           | 0 | 1 | 1 | 0 | 0       | G0: |
| 0045746 | Negative_regulation_of_Notch_signaling_pathway                              |   |   |   |   |         |     |
| _01     | 5                                                                           | 0 | 1 | 1 | 0 | 0       | G0: |
| 0045747 | Positive_regulation_of_Notch_signaling_pathway                              |   |   |   |   |         |     |
| _01     | 7                                                                           | 0 | 1 | 1 | 0 | 0       | G0: |
| 0045749 | Negative_regulation_of_S_phase_of_mitotic_cell_cycle                        |   |   |   |   |         |     |
| _01     | 18                                                                          | 0 | 1 | 1 | 0 | 0       | G0: |
| 0045765 | Regulation_of_angiogenesis                                                  |   |   |   |   |         |     |
| _01     | 29                                                                          | 0 | 1 | 1 | 0 | 0       | G0: |
| 0045766 | Positive_regulation_of_angiogenesis                                         |   |   |   |   |         |     |
| _01     | 27                                                                          | 0 | 1 | 1 | 0 | 0       | G0: |
| 0045768 | Positive_regulation_of_anti-apoptosis                                       |   |   |   |   |         |     |



|         |                                                         |   |   |   |   |          |     |
|---------|---------------------------------------------------------|---|---|---|---|----------|-----|
| _01     | 9                                                       | 0 | 1 | 1 | 0 | 0        | G0: |
| 0045773 | Positive_regulation_of_axon_extension                   |   |   |   |   |          |     |
| _01     | 14                                                      | 0 | 1 | 1 | 0 | 0        | G0: |
| 0045776 | Negative_regulation_of_blood_pressure                   |   |   |   |   |          |     |
| _01     | 8                                                       | 0 | 1 | 1 | 0 | 0        | G0: |
| 0045777 | Positive_regulation_of_blood_pressure                   |   |   |   |   |          |     |
| _01     | 7                                                       | 0 | 1 | 1 | 0 | 0        | G0: |
| 0045778 | Positive_regulation_of_ossification                     |   |   |   |   |          |     |
| _01     | 5                                                       | 0 | 1 | 1 | 0 | 0        | G0: |
| 0045779 | Negative_regulation_of_bone_resorption                  |   |   |   |   |          |     |
| _01     | 18                                                      | 0 | 1 | 1 | 0 | 0        | G0: |
| 0045785 | Positive_regulation_of_cell_adhesion                    |   |   |   |   |          |     |
| _01     | 28                                                      | 0 | 1 | 1 | 0 | 0        | G0: |
| 0045786 | Negative_regulation_of_cell_cycle                       |   |   |   |   |          |     |
| _01     | 11                                                      | 0 | 1 | 1 | 0 | 0        | G0: |
| 0045787 | Positive_regulation_of_cell_cycle                       |   |   |   |   |          |     |
| _01     | 7                                                       | 0 | 1 | 1 | 0 | 0        | G0: |
| 0045792 | Negative_regulation_of_cell_size                        |   |   |   |   |          |     |
| _01     | 6                                                       | 0 | 1 | 1 | 0 | 0        | G0: |
| 0045807 | Positive_regulation_of_endocytosis                      |   |   |   |   |          |     |
| _01     | 6                                                       | 0 | 1 | 1 | 0 | 0        | G0: |
| 0045821 | Positive_regulation_of_glycolysis                       |   |   |   |   |          |     |
| _01     | 6                                                       | 0 | 1 | 1 | 0 | 0        | G0: |
| 0045822 | Negative_regulation_of_heart_contraction                |   |   |   |   |          |     |
| _01     | 12                                                      | 0 | 1 | 1 | 0 | 0        | G0: |
| 0045840 | Positive_regulation_of_mitosis                          |   |   |   |   |          |     |
| _01     | 7                                                       | 0 | 1 | 1 | 0 | 0        | G0: |
| 0045859 | Regulation_of_protein_kinase_activity                   |   |   |   |   |          |     |
| _01     | 13                                                      | 0 | 1 | 1 | 0 | 0        | G0: |
| 0045860 | Positive_regulation_of_protein_kinase_activity          |   |   |   |   |          |     |
| _01     | 6                                                       | 1 | 1 | 1 | 0 | 0.000339 | G0: |
| 0045861 | Negative_regulation_of_proteolysis                      |   |   |   |   |          |     |
| _01     | 6                                                       | 0 | 1 | 1 | 0 | 0        | G0: |
| 0045862 | Positive_regulation_of_proteolysis                      |   |   |   |   |          |     |
| _01     | 5                                                       | 0 | 1 | 1 | 0 | 0        | G0: |
| 0045879 | Negative_regulation_of_smoothened_signaling_pathway     |   |   |   |   |          |     |
| _01     | 7                                                       | 0 | 1 | 1 | 0 | 0        | G0: |
| 0045880 | Positive_regulation_of_smoothened_signaling_pathway     |   |   |   |   |          |     |
| _01     | 12                                                      | 0 | 1 | 1 | 0 | 0        | G0: |
| 0045885 | Positive_regulation_of_survival_gene_product_expression |   |   |   |   |          |     |
| _01     | 61                                                      | 0 | 1 | 1 | 0 | 0        | G0: |
| 0045892 | Negative_regulation_of_transcription,_DNA-dependent     |   |   |   |   |          |     |
| _01     | 89                                                      | 0 | 1 | 1 | 0 | 0        | G0: |
| 0045893 | Positive_regulation_of_transcription,_DNA-dependent     |   |   |   |   |          |     |
| _01     | 11                                                      | 1 | 1 | 1 | 0 | 3.9e-05  | G0: |
| 0045907 | Positive_regulation_of_vasoconstriction                 |   |   |   |   |          |     |
| _01     | 11                                                      | 0 | 1 | 1 | 0 | 0        | G0: |
| 0045909 | Positive_regulation_of_vasodilation                     |   |   |   |   |          |     |
| _01     | 5                                                       | 0 | 1 | 1 | 0 | 0        | G0: |
| 0045921 | Positive_regulation_of_exocytosis                       |   |   |   |   |          |     |
| _01     | 8                                                       | 0 | 1 | 1 | 0 | 0        | G0: |
| 0045930 | Negative_regulation_of_mitotic_cell_cycle               |   |   |   |   |          |     |
| _01     | 12                                                      | 1 | 1 | 1 | 0 | 6.3e-05  | G0: |
| 0045931 | Positive_regulation_of_mitotic_cell_cycle               |   |   |   |   |          |     |

|         |                                                                      |   |   |   |   |         |     |
|---------|----------------------------------------------------------------------|---|---|---|---|---------|-----|
| _01     | 106                                                                  | 0 | 1 | 1 | 0 | 0       | G0: |
| 0045941 | Positive_regulation_of_transcription                                 |   |   |   |   |         |     |
| _01     | 228                                                                  | 1 | 1 | 1 | 0 | 6.3e-05 | G0: |
| 0045944 | Positive_regulation_of_transcription_from_RNA_polymerase_II_promoter |   |   |   |   |         |     |
| _01     | 5                                                                    | 0 | 1 | 1 | 0 | 0       | G0: |
| 0045947 | Negative_regulation_of_translational_initiation                      |   |   |   |   |         |     |
| _01     | 7                                                                    | 0 | 1 | 1 | 0 | 0       | G0: |
| 0045954 | Positive_regulation_of_natural_killer_cell_mediated_cytotoxicity     |   |   |   |   |         |     |
| _01     | 11                                                                   | 1 | 1 | 1 | 0 | 3.9e-05 | G0: |
| 0045987 | Positive_regulation_of_smooth_muscle_contraction                     |   |   |   |   |         |     |
| _01     | 5                                                                    | 0 | 1 | 1 | 0 | 0       | G0: |
| 0045995 | Regulation_of_embryonic_development                                  |   |   |   |   |         |     |
| _01     | 7                                                                    | 0 | 1 | 1 | 0 | 0       | G0: |
| 0046034 | ATP_metabolic_process                                                |   |   |   |   |         |     |
| _01     | 8                                                                    | 0 | 1 | 1 | 0 | 0       | G0: |
| 0046135 | Pyrimidine_nucleoside_catabolic_process                              |   |   |   |   |         |     |
| _01     | 6                                                                    | 0 | 1 | 1 | 0 | 0       | G0: |
| 0046209 | Nitric_oxide_metabolic_process                                       |   |   |   |   |         |     |
| _01     | 11                                                                   | 0 | 1 | 1 | 0 | 0       | G0: |
| 0046320 | Regulation_of_fatty_acid_oxidation                                   |   |   |   |   |         |     |
| _01     | 15                                                                   | 0 | 1 | 1 | 0 | 0       | G0: |
| 0046326 | Positive_regulation_of_glucose_import                                |   |   |   |   |         |     |
| _01     | 8                                                                    | 0 | 1 | 1 | 0 | 0       | G0: |
| 0046328 | Regulation_of_JNK_cascade                                            |   |   |   |   |         |     |
| _01     | 9                                                                    | 0 | 1 | 1 | 0 | 0       | G0: |
| 0046329 | Negative_regulation_of_JNK_cascade                                   |   |   |   |   |         |     |
| _01     | 19                                                                   | 1 | 1 | 1 | 0 | 5e-05   | G0: |
| 0046330 | Positive_regulation_of_JNK_cascade                                   |   |   |   |   |         |     |
| _01     | 19                                                                   | 0 | 1 | 1 | 0 | 0       | G0: |
| 0046332 | SMAD_binding                                                         |   |   |   |   |         |     |
| _01     | 6                                                                    | 0 | 1 | 1 | 0 | 0       | G0: |
| 0046415 | Urate_metabolic_process                                              |   |   |   |   |         |     |
| _01     | 7                                                                    | 0 | 1 | 1 | 0 | 0       | G0: |
| 0046427 | Positive_regulation_of_JAK-STAT_cascade                              |   |   |   |   |         |     |
| _01     | 5                                                                    | 0 | 1 | 1 | 0 | 0       | G0: |
| 0046470 | Phosphatidylcholine_metabolic_process                                |   |   |   |   |         |     |
| _01     | 8                                                                    | 0 | 1 | 1 | 0 | 0       | G0: |
| 0046488 | Phosphatidylinositol_metabolic_process                               |   |   |   |   |         |     |
| _01     | 5                                                                    | 0 | 1 | 1 | 0 | 0       | G0: |
| 0046498 | S-adenosylhomocysteine_metabolic_process                             |   |   |   |   |         |     |
| _01     | 7                                                                    | 0 | 1 | 1 | 0 | 0       | G0: |
| 0046513 | Ceramide_biosynthetic_process                                        |   |   |   |   |         |     |
| _01     | 9                                                                    | 0 | 1 | 1 | 0 | 0       | G0: |
| 0046579 | Positive_regulation_of_Ras_protein_signal_transduction               |   |   |   |   |         |     |
| _01     | 6                                                                    | 0 | 1 | 1 | 0 | 0       | G0: |
| 0046580 | Negative_regulation_of_Ras_protein_signal_transduction               |   |   |   |   |         |     |
| _01     | 5                                                                    | 0 | 1 | 1 | 0 | 0       | G0: |
| 0046620 | Regulation_of_organ_growth                                           |   |   |   |   |         |     |
| _01     | 12                                                                   | 0 | 1 | 1 | 0 | 0       | G0: |
| 0046627 | Negative_regulation_of_insulin_receptor_signaling_pathway            |   |   |   |   |         |     |
| _01     | 6                                                                    | 0 | 1 | 1 | 0 | 0       | G0: |
| 0046638 | Positive_regulation_of_alpha-beta_T_cell_differentiation             |   |   |   |   |         |     |

|         |                                                                       |   |   |   |   |         |     |
|---------|-----------------------------------------------------------------------|---|---|---|---|---------|-----|
| _01     | 5                                                                     | 0 | 1 | 1 | 0 | 0       | G0: |
| 0046641 | Positive_regulation_of_alpha-beta_T_cell_proliferation                |   |   |   |   |         | G0: |
| _01     | 5                                                                     | 0 | 1 | 1 | 0 | 0       | G0: |
| 0046655 | Folic_acid_metabolic_process                                          |   |   |   |   |         | G0: |
| _01     | 14                                                                    | 0 | 1 | 1 | 0 | 0       | G0: |
| 0046658 | Anchored_to_plasma_membrane                                           |   |   |   |   |         | G0: |
| _01     | 9                                                                     | 0 | 1 | 1 | 0 | 0       | G0: |
| 0046676 | Negative_regulation_of_insulin_secretion                              |   |   |   |   |         | G0: |
| _01     | 20                                                                    | 0 | 1 | 1 | 0 | 0       | G0: |
| 0046677 | Response_to_antibiotic                                                |   |   |   |   |         | G0: |
| _01     | 5                                                                     | 0 | 1 | 1 | 0 | 0       | G0: |
| 0046685 | Response_to_arsenic                                                   |   |   |   |   |         | G0: |
| _01     | 9                                                                     | 0 | 1 | 1 | 0 | 0       | G0: |
| 0046686 | Response_to_cadmium_ion                                               |   |   |   |   |         | G0: |
| _01     | 10                                                                    | 0 | 1 | 1 | 0 | 0       | G0: |
| 0046688 | Response_to_copper_ion                                                |   |   |   |   |         | G0: |
| _01     | 8                                                                     | 1 | 1 | 1 | 0 | 3.9e-05 | G0: |
| 0046697 | Decidualization                                                       |   |   |   |   |         | G0: |
| _01     | 8                                                                     | 1 | 1 | 1 | 0 | 5e-05   | G0: |
| 0046716 | Muscle_cell_homeostasis                                               |   |   |   |   |         | G0: |
| _01     | 52                                                                    | 0 | 1 | 1 | 0 | 0       | G0: |
| 0046777 | Protein_autophosphorylation                                           |   |   |   |   |         | G0: |
| _01     | 6                                                                     | 0 | 1 | 1 | 0 | 0       | G0: |
| 0046784 | Intronless_viral_mRNA_export_from_host_nucleus                        |   |   |   |   |         | G0: |
| _01     | 15                                                                    | 0 | 1 | 1 | 0 | 0       | G0: |
| 0046847 | Filopodium_assembly                                                   |   |   |   |   |         | G0: |
| _01     | 7                                                                     | 0 | 1 | 1 | 0 | 0       | G0: |
| 0046854 | Phosphoinositide_phosphorylation                                      |   |   |   |   |         | G0: |
| _01     | 10                                                                    | 0 | 1 | 1 | 0 | 0       | G0: |
| 0046873 | Metal_ion_transmembrane_transporter_activity                          |   |   |   |   |         | G0: |
| _01     | 5                                                                     | 0 | 1 | 1 | 0 | 0       | G0: |
| 0046875 | Ephrin_receptor_binding                                               |   |   |   |   |         | G0: |
| _01     | 8                                                                     | 0 | 1 | 1 | 0 | 0       | G0: |
| 0046887 | Positive_regulation_of_hormone_secretion                              |   |   |   |   |         | G0: |
| _01     | 7                                                                     | 0 | 1 | 1 | 0 | 0       | G0: |
| 0046888 | Negative_regulation_of_hormone_secretion                              |   |   |   |   |         | G0: |
| _01     | 6                                                                     | 0 | 1 | 1 | 0 | 0       | G0: |
| 0046902 | Regulation_of_mitochondrial_membrane_permeability                     |   |   |   |   |         | G0: |
| _01     | 13                                                                    | 0 | 1 | 1 | 0 | 0       | G0: |
| 0046907 | Intracellular_transport                                               |   |   |   |   |         | G0: |
| _01     | 5                                                                     | 0 | 1 | 1 | 0 | 0       | G0: |
| 0046914 | Transition_metal_ion_binding                                          |   |   |   |   |         | G0: |
| _01     | 10                                                                    | 0 | 1 | 1 | 0 | 0       | G0: |
| 0046928 | Regulation_of_neurotransmitter_secretion                              |   |   |   |   |         | G0: |
| _01     | 6                                                                     | 0 | 1 | 1 | 0 | 0       | G0: |
| 0046930 | Pore_complex                                                          |   |   |   |   |         | G0: |
| _01     | 10                                                                    | 0 | 1 | 1 | 0 | 0       | G0: |
| 0046933 | Hydrogen_ion_transporting_ATP_synthase_activity,_rotational_mechanism |   |   |   |   |         | G0: |
| _01     | 13                                                                    | 0 | 1 | 1 | 0 | 0       | G0: |
| 0046961 | Proton-transporting_ATPase_activity,_rotational_mechanism             |   |   |   |   |         | G0: |
| _01     | 5                                                                     | 0 | 1 | 1 | 0 | 0       | G0: |
| 0046965 | Retinoid_X_receptor_binding                                           |   |   |   |   |         | G0: |

|         |                                                               |   |   |   |   |          |     |
|---------|---------------------------------------------------------------|---|---|---|---|----------|-----|
| _01     | 16                                                            | 0 | 1 | 1 | 0 | 0        | G0: |
| 0046966 | Thyroid_hormone_receptor_binding                              |   |   |   |   |          |     |
| _01     | 148                                                           | 1 | 1 | 1 | 0 | 6.9e-05  | G0: |
| 0046982 | Protein_heterodimerization_activity                           |   |   |   |   |          |     |
| _01     | 56                                                            | 0 | 1 | 1 | 0 | 0        | G0: |
| 0046983 | Protein_dimerization_activity                                 |   |   |   |   |          |     |
| _01     | 5                                                             | 0 | 1 | 1 | 0 | 0        | G0: |
| 0047372 | Acylglycerol_lipase_activity                                  |   |   |   |   |          |     |
| _01     | 48                                                            | 0 | 1 | 1 | 0 | 0        | G0: |
| 0047485 | Protein_N-terminus_binding                                    |   |   |   |   |          |     |
| _01     | 5                                                             | 0 | 1 | 1 | 0 | 0        | G0: |
| 0047496 | Vesicle_transport_along_microtubule                           |   |   |   |   |          |     |
| _01     | 6                                                             | 0 | 1 | 1 | 0 | 0        | G0: |
| 0047498 | Calcium-dependent_phospholipase_A2_activity                   |   |   |   |   |          |     |
| _01     | 4                                                             | 0 | 1 | 1 | 0 | 0        | G0: |
| 0047760 | Butyrate-CoA_ligase_activity                                  |   |   |   |   |          |     |
| _01     | 15                                                            | 0 | 1 | 1 | 0 | 0        | G0: |
| 0048008 | Platelet-derived_growth_factor_receptor_signaling_pathway     |   |   |   |   |          |     |
| _01     | 8                                                             | 0 | 1 | 1 | 0 | 0        | G0: |
| 0048009 | Insulin-like_growth_factor_receptor_signaling_pathway         |   |   |   |   |          |     |
| _01     | 12                                                            | 0 | 1 | 1 | 0 | 0        | G0: |
| 0048010 | Vascular_endothelial_growth_factor_receptor_signaling_pathway |   |   |   |   |          |     |
| _01     | 146                                                           | 0 | 1 | 1 | 0 | 0        | G0: |
| 0048011 | Nerve_growth_factor_receptor_signaling_pathway                |   |   |   |   |          |     |
| _01     | 6                                                             | 0 | 1 | 1 | 0 | 0        | G0: |
| 0048013 | Ephrin_receptor_signaling_pathway                             |   |   |   |   |          |     |
| _01     | 45                                                            | 0 | 1 | 1 | 0 | 0        | G0: |
| 0048015 | Phosphoinositide-mediated_signaling                           |   |   |   |   |          |     |
| _01     | 12                                                            | 0 | 1 | 1 | 0 | 0        | G0: |
| 0048037 | Cofactor_binding                                              |   |   |   |   |          |     |
| _01     | 6                                                             | 0 | 1 | 1 | 0 | 0        | G0: |
| 0048038 | Quinone_binding                                               |   |   |   |   |          |     |
| _01     | 11                                                            | 1 | 1 | 1 | 0 | 5e-05    | G0: |
| 0048041 | Focal_adhesion_assembly                                       |   |   |   |   |          |     |
| _01     | 5                                                             | 0 | 1 | 1 | 0 | 0        | G0: |
| 0048066 | Developmental_pigmentation                                    |   |   |   |   |          |     |
| _01     | 29                                                            | 0 | 1 | 1 | 0 | 0        | G0: |
| 0048146 | Positive_regulation_of_fibroblast_proliferation               |   |   |   |   |          |     |
| _01     | 5                                                             | 0 | 1 | 1 | 0 | 0        | G0: |
| 0048147 | Negative_regulation_of_fibroblast_proliferation               |   |   |   |   |          |     |
| _01     | 5                                                             | 0 | 1 | 1 | 0 | 0        | G0: |
| 0048148 | Behavioral_response_to_cocaine                                |   |   |   |   |          |     |
| _01     | 13                                                            | 0 | 1 | 1 | 0 | 0        | G0: |
| 0048167 | Regulation_of_synaptic_plasticity                             |   |   |   |   |          |     |
| _01     | 12                                                            | 0 | 1 | 1 | 0 | 0        | G0: |
| 0048168 | Regulation_of_neuronal_synaptic_plasticity                    |   |   |   |   |          |     |
| _01     | 10                                                            | 0 | 1 | 1 | 0 | 0        | G0: |
| 0048169 | Regulation_of_long-term_neuronal_synaptic_plasticity          |   |   |   |   |          |     |
| _01     | 8                                                             | 0 | 1 | 1 | 0 | 0        | G0: |
| 0048185 | Activin_binding                                               |   |   |   |   |          |     |
| _01     | 6                                                             | 1 | 1 | 1 | 0 | 0.000423 | G0: |
| 0048188 | Set1C/COMPASS_complex                                         |   |   |   |   |          |     |
| _01     | 5                                                             | 0 | 1 | 1 | 0 | 0        | G0: |

|         |                                                          |   |   |   |   |         |  |     |
|---------|----------------------------------------------------------|---|---|---|---|---------|--|-----|
| 0048193 | Golgi_vesicle_transport                                  |   |   |   |   |         |  |     |
| _01     | 5                                                        | 0 | 1 | 1 | 0 | 0       |  | GO: |
| 0048205 | COPI_coating_of_Golgi_vesicle                            |   |   |   |   |         |  |     |
| _01     | 5                                                        | 0 | 1 | 1 | 0 | 0       |  | GO: |
| 0048208 | COPII_vesicle_coating                                    |   |   |   |   |         |  |     |
| _01     | 8                                                        | 0 | 1 | 1 | 0 | 0       |  | GO: |
| 0048246 | Macrophage_chemotaxis                                    |   |   |   |   |         |  |     |
| _01     | 6                                                        | 0 | 1 | 1 | 0 | 0       |  | GO: |
| 0048247 | Lymphocyte_chemotaxis                                    |   |   |   |   |         |  |     |
| _01     | 10                                                       | 0 | 1 | 1 | 0 | 0       |  | GO: |
| 0048255 | MRNA_stabilization                                       |   |   |   |   |         |  |     |
| _01     | 7                                                        | 0 | 1 | 1 | 0 | 0       |  | GO: |
| 0048260 | Positive_regulation_of_receptor-mediated_endocytosis     |   |   |   |   |         |  |     |
| _01     | 7                                                        | 0 | 1 | 1 | 0 | 0       |  | GO: |
| 0048265 | Response_to_pain                                         |   |   |   |   |         |  |     |
| _01     | 5                                                        | 0 | 1 | 1 | 0 | 0       |  | GO: |
| 0048268 | Clathrin_coat_assembly                                   |   |   |   |   |         |  |     |
| _01     | 19                                                       | 0 | 1 | 1 | 0 | 0       |  | GO: |
| 0048286 | Lung_alveolus_development                                |   |   |   |   |         |  |     |
| _01     | 6                                                        | 0 | 1 | 1 | 0 | 0       |  | GO: |
| 0048304 | Positive_regulation_of_isotype_switching_to_IgG_isotypes |   |   |   |   |         |  |     |
| _01     | 20                                                       | 0 | 1 | 1 | 0 | 0       |  | GO: |
| 0048306 | Calcium-dependent_protein_binding                        |   |   |   |   |         |  |     |
| _01     | 5                                                        | 0 | 1 | 1 | 0 | 0       |  | GO: |
| 0048339 | Paraxial_mesoderm_development                            |   |   |   |   |         |  |     |
| _01     | 7                                                        | 0 | 1 | 1 | 0 | 0       |  | GO: |
| 0048365 | Rac_GTPase_binding                                       |   |   |   |   |         |  |     |
| _01     | 6                                                        | 0 | 1 | 1 | 0 | 0       |  | GO: |
| 0048384 | Retinoic_acid_receptor_signaling_pathway                 |   |   |   |   |         |  |     |
| _01     | 8                                                        | 0 | 1 | 1 | 0 | 0       |  | GO: |
| 0048407 | Platelet-derived_growth_factor_binding                   |   |   |   |   |         |  |     |
| _01     | 12                                                       | 0 | 1 | 1 | 0 | 0       |  | GO: |
| 0048468 | Cell_development                                         |   |   |   |   |         |  |     |
| _01     | 17                                                       | 0 | 1 | 1 | 0 | 0       |  | GO: |
| 0048469 | Cell_maturation                                          |   |   |   |   |         |  |     |
| _01     | 236                                                      | 0 | 1 | 1 | 0 | 0       |  | GO: |
| 0048471 | Perinuclear_region_of_cytoplasm                          |   |   |   |   |         |  |     |
| _01     | 9                                                        | 1 | 1 | 1 | 0 | 6.9e-05 |  | GO: |
| 0048477 | Oogenesis                                                |   |   |   |   |         |  |     |
| _01     | 6                                                        | 0 | 1 | 1 | 0 | 0       |  | GO: |
| 0048484 | Enteric_nervous_system_development                       |   |   |   |   |         |  |     |
| _01     | 7                                                        | 0 | 1 | 1 | 0 | 0       |  | GO: |
| 0048485 | Sympathetic_nervous_system_development                   |   |   |   |   |         |  |     |
| _01     | 10                                                       | 0 | 1 | 1 | 0 | 0       |  | GO: |
| 0048487 | Beta-tubulin_binding                                     |   |   |   |   |         |  |     |
| _01     | 5                                                        | 0 | 1 | 1 | 0 | 0       |  | GO: |
| 0048489 | Synaptic_vesicle_transport                               |   |   |   |   |         |  |     |
| _01     | 14                                                       | 0 | 1 | 1 | 0 | 0       |  | GO: |
| 0048511 | Rhythmic_process                                         |   |   |   |   |         |  |     |
| _01     | 5                                                        | 0 | 1 | 1 | 0 | 0       |  | GO: |
| 0048513 | Organ_development                                        |   |   |   |   |         |  |     |
| _01     | 10                                                       | 0 | 1 | 1 | 0 | 0       |  | GO: |
| 0048514 | Blood_vessel_morphogenesis                               |   |   |   |   |         |  |     |
| _01     | 12                                                       | 0 | 1 | 1 | 0 | 0       |  | GO: |

|         |                                                          |   |   |   |   |          |     |  |
|---------|----------------------------------------------------------|---|---|---|---|----------|-----|--|
| 0048536 | Spleen_development                                       |   |   |   |   |          |     |  |
| _01     | 19                                                       | 0 | 1 | 1 | 0 | 0        | G0: |  |
| 0048538 | Thymus_development                                       |   |   |   |   |          |     |  |
| _01     | 5                                                        | 0 | 1 | 1 | 0 | 0        | G0: |  |
| 0048541 | Peyer's_patch_development                                |   |   |   |   |          |     |  |
| _01     | 14                                                       | 0 | 1 | 1 | 0 | 0        | G0: |  |
| 0048545 | Response_to_steroid_hormone_stimulus                     |   |   |   |   |          |     |  |
| _01     | 10                                                       | 0 | 1 | 1 | 0 | 0        | G0: |  |
| 0048565 | Digestive_tract_development                              |   |   |   |   |          |     |  |
| _01     | 7                                                        | 0 | 1 | 1 | 0 | 0        | G0: |  |
| 0048566 | Embryonic_digestive_tract_development                    |   |   |   |   |          |     |  |
| _01     | 8                                                        | 0 | 1 | 1 | 0 | 0        | G0: |  |
| 0048568 | Embryonic_organ_development                              |   |   |   |   |          |     |  |
| _01     | 20                                                       | 0 | 1 | 1 | 0 | 0        | G0: |  |
| 0048589 | Developmental_growth                                     |   |   |   |   |          |     |  |
| _01     | 12                                                       | 0 | 1 | 1 | 0 | 0        | G0: |  |
| 0048593 | Camera-type_eye_morphogenesis                            |   |   |   |   |          |     |  |
| _01     | 7                                                        | 1 | 1 | 1 | 0 | 6.9e-05  | G0: |  |
| 0048599 | Oocyte_development                                       |   |   |   |   |          |     |  |
| _01     | 6                                                        | 0 | 1 | 1 | 0 | 0        | G0: |  |
| 0048617 | Embryonic_foregut_morphogenesis                          |   |   |   |   |          |     |  |
| _01     | 5                                                        | 1 | 1 | 1 | 0 | 0.000339 | G0: |  |
| 0048644 | Muscle_organ_morphogenesis                               |   |   |   |   |          |     |  |
| _01     | 10                                                       | 0 | 1 | 1 | 0 | 0        | G0: |  |
| 0048646 | Anatomical_structure_formation_involved_in_morphogenesis |   |   |   |   |          |     |  |
| _01     | 20                                                       | 1 | 1 | 1 | 0 | 3.9e-05  | G0: |  |
| 0048661 | Positive_regulation_of_smooth_muscle_cell_proliferation  |   |   |   |   |          |     |  |
| _01     | 9                                                        | 0 | 1 | 1 | 0 | 0        | G0: |  |
| 0048662 | Negative_regulation_of_smooth_muscle_cell_proliferation  |   |   |   |   |          |     |  |
| _01     | 11                                                       | 0 | 1 | 1 | 0 | 0        | G0: |  |
| 0048663 | Neuron_fate_commitment                                   |   |   |   |   |          |     |  |
| _01     | 7                                                        | 1 | 1 | 1 | 0 | 6.3e-05  | G0: |  |
| 0048665 | Neuron_fate_specification                                |   |   |   |   |          |     |  |
| _01     | 19                                                       | 0 | 1 | 1 | 0 | 0        | G0: |  |
| 0048666 | Neuron_development                                       |   |   |   |   |          |     |  |
| _01     | 13                                                       | 0 | 1 | 1 | 0 | 0        | G0: |  |
| 0048678 | Response_to_axon_injury                                  |   |   |   |   |          |     |  |
| _01     | 5                                                        | 0 | 1 | 1 | 0 | 0        | G0: |  |
| 0048699 | Generation_of_neurons                                    |   |   |   |   |          |     |  |
| _01     | 10                                                       | 0 | 1 | 1 | 0 | 0        | G0: |  |
| 0048701 | Embryonic_cranial_skeleton_morphogenesis                 |   |   |   |   |          |     |  |
| _01     | 7                                                        | 0 | 1 | 1 | 0 | 0        | G0: |  |
| 0048703 | Embryonic_viscerocranium_morphogenesis                   |   |   |   |   |          |     |  |
| _01     | 31                                                       | 1 | 1 | 1 | 0 | 0.000339 | G0: |  |
| 0048704 | Embryonic_skeletal_system_morphogenesis                  |   |   |   |   |          |     |  |
| _01     | 17                                                       | 0 | 1 | 1 | 0 | 0        | G0: |  |
| 0048705 | Skeletal_system_morphogenesis                            |   |   |   |   |          |     |  |
| _01     | 15                                                       | 0 | 1 | 1 | 0 | 0        | G0: |  |
| 0048706 | Embryonic_skeletal_system_development                    |   |   |   |   |          |     |  |
| _01     | 8                                                        | 0 | 1 | 1 | 0 | 0        | G0: |  |
| 0048709 | Oligodendrocyte_differentiation                          |   |   |   |   |          |     |  |
| _01     | 8                                                        | 0 | 1 | 1 | 0 | 0        | G0: |  |
| 0048738 | Cardiac_muscle_tissue_development                        |   |   |   |   |          |     |  |
| _01     | 6                                                        | 0 | 1 | 1 | 0 | 0        | G0: |  |



|         |                                                          |   |   |   |   |         |     |
|---------|----------------------------------------------------------|---|---|---|---|---------|-----|
| _01     | 8                                                        | 0 | 1 | 1 | 0 | 0       | G0: |
| 0050718 | Positive_regulation_of_interleukin-1_beta_secretion      |   |   |   |   |         |     |
| _01     | 8                                                        | 1 | 1 | 1 | 0 | 3.9e-05 | G0: |
| 0050727 | Regulation_of_inflammatory_response                      |   |   |   |   |         |     |
| _01     | 17                                                       | 0 | 1 | 1 | 0 | 0       | G0: |
| 0050728 | Negative_regulation_of_inflammatory_response             |   |   |   |   |         |     |
| _01     | 16                                                       | 0 | 1 | 1 | 0 | 0       | G0: |
| 0050729 | Positive_regulation_of_inflammatory_response             |   |   |   |   |         |     |
| _01     | 7                                                        | 0 | 1 | 1 | 0 | 0       | G0: |
| 0050730 | Regulation_of_peptidyl-tyrosine_phosphorylation          |   |   |   |   |         |     |
| _01     | 34                                                       | 0 | 1 | 1 | 0 | 0       | G0: |
| 0050731 | Positive_regulation_of_peptidyl-tyrosine_phosphorylation |   |   |   |   |         |     |
| _01     | 5                                                        | 0 | 1 | 1 | 0 | 0       | G0: |
| 0050732 | Negative_regulation_of_peptidyl-tyrosine_phosphorylation |   |   |   |   |         |     |
| _01     | 10                                                       | 0 | 1 | 1 | 0 | 0       | G0: |
| 0050750 | Low-density_lipoprotein_receptor_binding                 |   |   |   |   |         |     |
| _01     | 9                                                        | 0 | 1 | 1 | 0 | 0       | G0: |
| 0050766 | Positive_regulation_of_phagocytosis                      |   |   |   |   |         |     |
| _01     | 9                                                        | 0 | 1 | 1 | 0 | 0       | G0: |
| 0050768 | Negative_regulation_of_neurogenesis                      |   |   |   |   |         |     |
| _01     | 7                                                        | 0 | 1 | 1 | 0 | 0       | G0: |
| 0050769 | Positive_regulation_of_neurogenesis                      |   |   |   |   |         |     |
| _01     | 13                                                       | 0 | 1 | 1 | 0 | 0       | G0: |
| 0050770 | Regulation_of_axonogenesis                               |   |   |   |   |         |     |
| _01     | 12                                                       | 0 | 1 | 1 | 0 | 0       | G0: |
| 0050771 | Negative_regulation_of_axonogenesis                      |   |   |   |   |         |     |
| _01     | 10                                                       | 0 | 1 | 1 | 0 | 0       | G0: |
| 0050772 | Positive_regulation_of_axonogenesis                      |   |   |   |   |         |     |
| _01     | 7                                                        | 0 | 1 | 1 | 0 | 0       | G0: |
| 0050775 | Positive_regulation_of_dendrite_morphogenesis            |   |   |   |   |         |     |
| _01     | 41                                                       | 0 | 1 | 1 | 0 | 0       | G0: |
| 0050776 | Regulation_of_immune_response                            |   |   |   |   |         |     |
| _01     | 52                                                       | 0 | 1 | 1 | 0 | 0       | G0: |
| 0050796 | Regulation_of_insulin_secretion                          |   |   |   |   |         |     |
| _01     | 5                                                        | 0 | 1 | 1 | 0 | 0       | G0: |
| 0050804 | Regulation_of_synaptic_transmission                      |   |   |   |   |         |     |
| _01     | 5                                                        | 0 | 1 | 1 | 0 | 0       | G0: |
| 0050806 | Positive_regulation_of_synaptic_transmission             |   |   |   |   |         |     |
| _01     | 5                                                        | 0 | 1 | 1 | 0 | 0       | G0: |
| 0050808 | Synapse_organization                                     |   |   |   |   |         |     |
| _01     | 5                                                        | 0 | 1 | 1 | 0 | 0       | G0: |
| 0050810 | Regulation_of_steroid_biosynthetic_process               |   |   |   |   |         |     |
| _01     | 6                                                        | 0 | 1 | 1 | 0 | 0       | G0: |
| 0050811 | GABA_receptor_binding                                    |   |   |   |   |         |     |
| _01     | 26                                                       | 0 | 1 | 1 | 0 | 0       | G0: |
| 0050821 | Protein_stabilization                                    |   |   |   |   |         |     |
| _01     | 7                                                        | 0 | 1 | 1 | 0 | 0       | G0: |
| 0050829 | Defense_response_to_Gram-negative_bacterium              |   |   |   |   |         |     |
| _01     | 15                                                       | 0 | 1 | 1 | 0 | 0       | G0: |
| 0050830 | Defense_response_to_Gram-positive_bacterium              |   |   |   |   |         |     |
| _01     | 5                                                        | 0 | 1 | 1 | 0 | 0       | G0: |
| 0050832 | Defense_response_to_fungus                               |   |   |   |   |         |     |
| _01     | 7                                                        | 0 | 1 | 1 | 0 | 0       | G0: |
| 0050839 | Cell_adhesion_molecule_binding                           |   |   |   |   |         |     |



|         |                                                                          |   |   |   |   |   |     |
|---------|--------------------------------------------------------------------------|---|---|---|---|---|-----|
| _01     | 9                                                                        | 0 | 1 | 1 | 0 | 0 | G0: |
| 0050840 | Extracellular_matrix_binding                                             |   |   |   |   |   |     |
| _01     | 12                                                                       | 0 | 1 | 1 | 0 | 0 | G0: |
| 0050850 | Positive_regulation_of_calcium-mediated_signaling                        |   |   |   |   |   |     |
| _01     | 49                                                                       | 0 | 1 | 1 | 0 | 0 | G0: |
| 0050852 | T_cell_receptor_signaling_pathway                                        |   |   |   |   |   |     |
| _01     | 10                                                                       | 0 | 1 | 1 | 0 | 0 | G0: |
| 0050853 | B_cell_receptor_signaling_pathway                                        |   |   |   |   |   |     |
| _01     | 5                                                                        | 0 | 1 | 1 | 0 | 0 | G0: |
| 0050860 | Negative_regulation_of_T_cell_receptor_signaling_pathway                 |   |   |   |   |   |     |
| _01     | 6                                                                        | 0 | 1 | 1 | 0 | 0 | G0: |
| 0050870 | Positive_regulation_of_T_cell_activation                                 |   |   |   |   |   |     |
| _01     | 5                                                                        | 0 | 1 | 1 | 0 | 0 | G0: |
| 0050872 | White_fat_cell_differentiation                                           |   |   |   |   |   |     |
| _01     | 18                                                                       | 0 | 1 | 1 | 0 | 0 | G0: |
| 0050873 | Brown_fat_cell_differentiation                                           |   |   |   |   |   |     |
| _01     | 5                                                                        | 0 | 1 | 1 | 0 | 0 | G0: |
| 0050877 | Neurological_system_process                                              |   |   |   |   |   |     |
| _01     | 11                                                                       | 0 | 1 | 1 | 0 | 0 | G0: |
| 0050880 | Regulation_of_blood_vessel_size                                          |   |   |   |   |   |     |
| _01     | 14                                                                       | 0 | 1 | 1 | 0 | 0 | G0: |
| 0050885 | Neuromuscular_process_controlling_balance                                |   |   |   |   |   |     |
| _01     | 6                                                                        | 0 | 1 | 1 | 0 | 0 | G0: |
| 0050890 | Cognition                                                                |   |   |   |   |   |     |
| _01     | 5                                                                        | 0 | 1 | 1 | 0 | 0 | G0: |
| 0050892 | Intestinal_absorption                                                    |   |   |   |   |   |     |
| _01     | 406                                                                      | 0 | 1 | 1 | 0 | 0 | G0: |
| 0050896 | Response_to_stimulus                                                     |   |   |   |   |   |     |
| _01     | 61                                                                       | 0 | 1 | 1 | 0 | 0 | G0: |
| 0050900 | Leukocyte_migration                                                      |   |   |   |   |   |     |
| _01     | 5                                                                        | 0 | 1 | 1 | 0 | 0 | G0: |
| 0050901 | Leukocyte_tethering_or_rolling                                           |   |   |   |   |   |     |
| _01     | 13                                                                       | 0 | 1 | 1 | 0 | 0 | G0: |
| 0050909 | Sensory_perception_of_taste                                              |   |   |   |   |   |     |
| _01     | 7                                                                        | 0 | 1 | 1 | 0 | 0 | G0: |
| 0050910 | Detection_of_mechanical_stimulus_involved_in_sensory_perception_of_sound |   |   |   |   |   |     |
| _01     | 5                                                                        | 0 | 1 | 1 | 0 | 0 | G0: |
| 0050918 | Positive_chemotaxis                                                      |   |   |   |   |   |     |
| _01     | 5                                                                        | 0 | 1 | 1 | 0 | 0 | G0: |
| 0050919 | Negative_chemotaxis                                                      |   |   |   |   |   |     |
| _01     | 7                                                                        | 0 | 1 | 1 | 0 | 0 | G0: |
| 0050927 | Positive_regulation_of_positive_chemotaxis                               |   |   |   |   |   |     |
| _01     | 8                                                                        | 0 | 1 | 1 | 0 | 0 | G0: |
| 0050930 | Induction_of_positive_chemotaxis                                         |   |   |   |   |   |     |
| _01     | 8                                                                        | 0 | 1 | 1 | 0 | 0 | G0: |
| 0050953 | Sensory_perception_of_light_stimulus                                     |   |   |   |   |   |     |
| _01     | 6                                                                        | 0 | 1 | 1 | 0 | 0 | G0: |
| 0050957 | Equilibrioception                                                        |   |   |   |   |   |     |
| _01     | 7                                                                        | 0 | 1 | 1 | 0 | 0 | G0: |
| 0050995 | Negative_regulation_of_lipid_catabolic_process                           |   |   |   |   |   |     |
| _01     | 8                                                                        | 0 | 1 | 1 | 0 | 0 | G0: |
| 0050999 | Regulation_of_nitric-oxide_synthase_activity                             |   |   |   |   |   |     |

|         |                                                                |   |            |          |   |          |     |
|---------|----------------------------------------------------------------|---|------------|----------|---|----------|-----|
| _01     | 8                                                              | 0 | 1          | 1        | 0 | 0        | G0: |
| 0051000 | Positive_regulation_of_nitric-oxide_synthase_activity          |   |            |          |   |          |     |
| _01     | 7                                                              | 0 | 1          | 1        | 0 | 0        | G0: |
| 0051006 | Positive_regulation_of_lipoprotein_lipase_activity             |   |            |          |   |          |     |
| _01     | 8                                                              | 0 | 1          | 1        | 0 | 0        | G0: |
| 0051010 | Microtubule_plus-end_binding                                   |   |            |          |   |          |     |
| _01     | 33                                                             | 1 | 1          | 1        | 0 | 6.9e-05  | G0: |
| 0051015 | Actin_filament_binding                                         |   |            |          |   |          |     |
| _01     | 10                                                             | 1 | 1          | 1        | 0 | 6.9e-05  | G0: |
| 0051017 | Actin_filament_bundle_assembly                                 |   |            |          |   |          |     |
| _01     | 5                                                              | 0 | 1          | 1        | 0 | 0        | G0: |
| 0051018 | Protein_kinase_A_binding                                       |   |            |          |   |          |     |
| _01     | 5                                                              | 0 | 1          | 1        | 0 | 0        | G0: |
| 0051019 | Mitogen-activated_protein_kinase_binding                       |   |            |          |   |          |     |
| _01     | 11                                                             | 0 | 1          | 1        | 0 | 0        | G0: |
| 0051020 | GTPase_binding                                                 |   |            |          |   |          |     |
| _01     | 27                                                             | 0 | 1          | 1        | 0 | 0        | G0: |
| 0051028 | MRNA_transport                                                 |   |            |          |   |          |     |
| _01     | 7                                                              | 0 | 1          | 1        | 0 | 0        | G0: |
| 0051044 | Positive_regulation_of_membrane_protein_ectodomain_proteolysis |   |            |          |   |          |     |
| _01     | 106                                                            | 2 | 0.00927499 | 0.466609 | 0 | 0.000236 | G0: |
| 0051056 | Regulation_of_small_GTPase_mediated_signal_transduction        |   |            |          |   |          |     |
| _01     | 10                                                             | 0 | 1          | 1        | 0 | 0        | G0: |
| 0051059 | NF-kappaB_binding                                              |   |            |          |   |          |     |
| _01     | 72                                                             | 0 | 1          | 1        | 0 | 0        | G0: |
| 0051082 | Unfolded_protein_binding                                       |   |            |          |   |          |     |
| _01     | 19                                                             | 0 | 1          | 1        | 0 | 0        | G0: |
| 0051084 | 'de_novo'_posttranslational_protein_folding                    |   |            |          |   |          |     |
| _01     | 8                                                              | 0 | 1          | 1        | 0 | 0        | G0: |
| 0051085 | Chaperone_mediated_protein_folding_requiring_cofactor          |   |            |          |   |          |     |
| _01     | 18                                                             | 0 | 1          | 1        | 0 | 0        | G0: |
| 0051087 | Chaperone_binding                                              |   |            |          |   |          |     |
| _01     | 40                                                             | 1 | 1          | 1        | 0 | 6.3e-05  | G0: |
| 0051090 | Regulation_of_transcription_factor_activity                    |   |            |          |   |          |     |
| _01     | 28                                                             | 1 | 1          | 1        | 0 | 6.3e-05  | G0: |
| 0051091 | Positive_regulation_of_transcription_factor_activity           |   |            |          |   |          |     |
| _01     | 41                                                             | 0 | 1          | 1        | 0 | 0        | G0: |
| 0051092 | Positive_regulation_of_NF-kappaB_transcription_factor_activity |   |            |          |   |          |     |
| _01     | 12                                                             | 0 | 1          | 1        | 0 | 0        | G0: |
| 0051117 | ATPase_binding                                                 |   |            |          |   |          |     |
| _01     | 7                                                              | 0 | 1          | 1        | 0 | 0        | G0: |
| 0051145 | Smooth_muscle_cell_differentiation                             |   |            |          |   |          |     |
| _01     | 8                                                              | 0 | 1          | 1        | 0 | 0        | G0: |
| 0051209 | Release_of_sequestered_calcium_ion_into_cytosol                |   |            |          |   |          |     |
| _01     | 28                                                             | 0 | 1          | 1        | 0 | 0        | G0: |
| 0051216 | Cartilage_development                                          |   |            |          |   |          |     |
| _01     | 15                                                             | 0 | 1          | 1        | 0 | 0        | G0: |
| 0051219 | Phosphoprotein_binding                                         |   |            |          |   |          |     |
| _01     | 13                                                             | 0 | 1          | 1        | 0 | 0        | G0: |
| 0051225 | Spindle_assembly                                               |   |            |          |   |          |     |
| _01     | 27                                                             | 0 | 1          | 1        | 0 | 0        | G0: |
| 0051246 | Regulation_of_protein_metabolic_process                        |   |            |          |   |          |     |

|         |                                                                                         |   |   |   |   |          |     |
|---------|-----------------------------------------------------------------------------------------|---|---|---|---|----------|-----|
| _01     | 14                                                                                      | 0 | 1 | 1 | 0 | 0        | G0: |
| 0051258 | Protein_polymerization                                                                  |   |   |   |   |          |     |
| _01     | 20                                                                                      | 0 | 1 | 1 | 0 | 0        | G0: |
| 0051259 | Protein_oligomerization                                                                 |   |   |   |   |          |     |
| _01     | 47                                                                                      | 0 | 1 | 1 | 0 | 0        | G0: |
| 0051260 | Protein_homooligomerization                                                             |   |   |   |   |          |     |
| _01     | 7                                                                                       | 0 | 1 | 1 | 0 | 0        | G0: |
| 0051262 | Protein_tetramerization                                                                 |   |   |   |   |          |     |
| _01     | 10                                                                                      | 0 | 1 | 1 | 0 | 0        | G0: |
| 0051272 | Positive_regulation_of_cellular_component_movement                                      |   |   |   |   |          |     |
| _01     | 9                                                                                       | 0 | 1 | 1 | 0 | 0        | G0: |
| 0051276 | Chromosome_organization                                                                 |   |   |   |   |          |     |
| _01     | 8                                                                                       | 0 | 1 | 1 | 0 | 0        | G0: |
| 0051281 | Positive_regulation_of_release_of_sequestered_calcium_ion_into_cytosol                  |   |   |   |   |          |     |
| _01     | 23                                                                                      | 0 | 1 | 1 | 0 | 0        | G0: |
| 0051287 | NAD_or_NADH_binding                                                                     |   |   |   |   |          |     |
| _01     | 16                                                                                      | 0 | 1 | 1 | 0 | 0        | G0: |
| 0051289 | Protein_homotetramerization                                                             |   |   |   |   |          |     |
| _01     | 5                                                                                       | 0 | 1 | 1 | 0 | 0        | G0: |
| 0051290 | Protein_heterotetramerization                                                           |   |   |   |   |          |     |
| _01     | 33                                                                                      | 0 | 1 | 1 | 0 | 0        | G0: |
| 0051291 | Protein_heterooligomerization                                                           |   |   |   |   |          |     |
| _01     | 10                                                                                      | 0 | 1 | 1 | 0 | 0        | G0: |
| 0051297 | Centrosome_organization                                                                 |   |   |   |   |          |     |
| _01     | 5                                                                                       | 0 | 1 | 1 | 0 | 0        | G0: |
| 0051298 | Centrosome_duplication                                                                  |   |   |   |   |          |     |
| _01     | 145                                                                                     | 1 | 1 | 1 | 0 | 0.000423 | G0: |
| 0051301 | Cell_division                                                                           |   |   |   |   |          |     |
| _01     | 5                                                                                       | 0 | 1 | 1 | 0 | 0        | G0: |
| 0051378 | Serotonin_binding                                                                       |   |   |   |   |          |     |
| _01     | 47                                                                                      | 1 | 1 | 1 | 0 | 3.9e-05  | G0: |
| 0051384 | Response_to_glucocorticoid_stimulus                                                     |   |   |   |   |          |     |
| _01     | 11                                                                                      | 0 | 1 | 1 | 0 | 0        | G0: |
| 0051402 | Neuron_apoptosis                                                                        |   |   |   |   |          |     |
| _01     | 34                                                                                      | 0 | 1 | 1 | 0 | 0        | G0: |
| 0051403 | Stress-activated_MAPK_cascade                                                           |   |   |   |   |          |     |
| _01     | 14                                                                                      | 0 | 1 | 1 | 0 | 0        | G0: |
| 0051412 | Response_to_corticosterone_stimulus                                                     |   |   |   |   |          |     |
| _01     | 46                                                                                      | 1 | 1 | 1 | 0 | 0.000423 | G0: |
| 0051436 | Negative_regulation_of_ubiquitin-protein_ligase_activity_involved_in_mitotic_cell_cycle |   |   |   |   |          |     |
| _01     | 51                                                                                      | 1 | 1 | 1 | 0 | 0.000423 | G0: |
| 0051437 | Positive_regulation_of_ubiquitin-protein_ligase_activity_involved_in_mitotic_cell_cycle |   |   |   |   |          |     |
| _01     | 52                                                                                      | 1 | 1 | 1 | 0 | 0.000423 | G0: |
| 0051439 | Regulation_of_ubiquitin-protein_ligase_activity_involved_in_mitotic_cell_cycle          |   |   |   |   |          |     |
| _01     | 6                                                                                       | 0 | 1 | 1 | 0 | 0        | G0: |
| 0051457 | Maintenance_of_protein_location_in_nucleus                                              |   |   |   |   |          |     |
| _01     | 7                                                                                       | 0 | 1 | 1 | 0 | 0        | G0: |
| 0051480 | Cytosolic_calcium_ion_homeostasis                                                       |   |   |   |   |          |     |
| _01     | 9                                                                                       | 0 | 1 | 1 | 0 | 0        | G0: |

|         |                                                                                                                  |   |   |   |   |          |     |
|---------|------------------------------------------------------------------------------------------------------------------|---|---|---|---|----------|-----|
| 0051482 | Elevation_of_cytosolic_calcium_ion_concentration_involved_in_G-protein_signaling_coupled_to_IP3_second_messenger |   |   |   |   |          |     |
| _01     | 8                                                                                                                | 0 | 1 | 1 | 0 | 0        | G0: |
| 0051491 | Positive_regulation_of_filopodium_assembly                                                                       |   |   |   |   |          |     |
| _01     | 11                                                                                                               | 0 | 1 | 1 | 0 | 0        | G0: |
| 0051496 | Positive_regulation_of_stress_fiber_assembly                                                                     |   |   |   |   |          |     |
| _01     | 9                                                                                                                | 0 | 1 | 1 | 0 | 0        | G0: |
| 0051536 | Iron-sulfur_cluster_binding                                                                                      |   |   |   |   |          |     |
| _01     | 10                                                                                                               | 0 | 1 | 1 | 0 | 0        | G0: |
| 0051537 | 2_iron,_2_sulfur_cluster_binding                                                                                 |   |   |   |   |          |     |
| _01     | 15                                                                                                               | 0 | 1 | 1 | 0 | 0        | G0: |
| 0051539 | 4_iron,_4_sulfur_cluster_binding                                                                                 |   |   |   |   |          |     |
| _01     | 8                                                                                                                | 1 | 1 | 1 | 0 | 0.000423 | G0: |
| 0051568 | Histone_H3-K4_methylation                                                                                        |   |   |   |   |          |     |
| _01     | 26                                                                                                               | 0 | 1 | 1 | 0 | 0        | G0: |
| 0051591 | Response_to_cAMP                                                                                                 |   |   |   |   |          |     |
| _01     | 34                                                                                                               | 0 | 1 | 1 | 0 | 0        | G0: |
| 0051592 | Response_to_calcium_ion                                                                                          |   |   |   |   |          |     |
| _01     | 7                                                                                                                | 0 | 1 | 1 | 0 | 0        | G0: |
| 0051602 | Response_to_electrical_stimulus                                                                                  |   |   |   |   |          |     |
| _01     | 15                                                                                                               | 0 | 1 | 1 | 0 | 0        | G0: |
| 0051603 | Proteolysis_involved_in_cellular_protein_catabolic_process                                                       |   |   |   |   |          |     |
| _01     | 11                                                                                                               | 0 | 1 | 1 | 0 | 0        | G0: |
| 0051605 | Protein_maturation_by_peptide_bond_cleavage                                                                      |   |   |   |   |          |     |
| _01     | 16                                                                                                               | 0 | 1 | 1 | 0 | 0        | G0: |
| 0051607 | Defense_response_to_virus                                                                                        |   |   |   |   |          |     |
| _01     | 7                                                                                                                | 0 | 1 | 1 | 0 | 0        | G0: |
| 0051635 | Bacterial_cell_surface_binding                                                                                   |   |   |   |   |          |     |
| _01     | 5                                                                                                                | 0 | 1 | 1 | 0 | 0        | G0: |
| 0051642 | Centrosome_localization                                                                                          |   |   |   |   |          |     |
| _01     | 12                                                                                                               | 0 | 1 | 1 | 0 | 0        | G0: |
| 0051693 | Actin_filament_capping                                                                                           |   |   |   |   |          |     |
| _01     | 9                                                                                                                | 0 | 1 | 1 | 0 | 0        | G0: |
| 0051721 | Protein_phosphatase_2A_binding                                                                                   |   |   |   |   |          |     |
| _01     | 36                                                                                                               | 1 | 1 | 1 | 0 | 3.9e-05  | G0: |
| 0051726 | Regulation_of_cell_cycle                                                                                         |   |   |   |   |          |     |
| _01     | 6                                                                                                                | 0 | 1 | 1 | 0 | 0        | G0: |
| 0051739 | Ammonia_transmembrane_transporter_activity                                                                       |   |   |   |   |          |     |
| _01     | 30                                                                                                               | 0 | 1 | 1 | 0 | 0        | G0: |
| 0051781 | Positive_regulation_of_cell_division                                                                             |   |   |   |   |          |     |
| _01     | 5                                                                                                                | 0 | 1 | 1 | 0 | 0        | G0: |
| 0051787 | Misfolded_protein_binding                                                                                        |   |   |   |   |          |     |
| _01     | 30                                                                                                               | 0 | 1 | 1 | 0 | 0        | G0: |
| 0051789 | Response_to_protein_stimulus                                                                                     |   |   |   |   |          |     |
| _01     | 5                                                                                                                | 1 | 1 | 1 | 0 | 0.000423 | G0: |
| 0051864 | Histone_demethylase_activity_(H3-K36_specific)                                                                   |   |   |   |   |          |     |
| _01     | 15                                                                                                               | 0 | 1 | 1 | 0 | 0        | G0: |
| 0051865 | Protein_autoubiquitination                                                                                       |   |   |   |   |          |     |
| _01     | 7                                                                                                                | 0 | 1 | 1 | 0 | 0        | G0: |
| 0051879 | Hsp90_protein_binding                                                                                            |   |   |   |   |          |     |
| _01     | 6                                                                                                                | 0 | 1 | 1 | 0 | 0        | G0: |
| 0051881 | Regulation_of_mitochondrial_membrane_potential                                                                   |   |   |   |   |          |     |
| _01     | 16                                                                                                               | 0 | 1 | 1 | 0 | 0        | G0: |

|         |                                                             |     |     |   |         |          |   |          |     |
|---------|-------------------------------------------------------------|-----|-----|---|---------|----------|---|----------|-----|
| 0051897 | Positive_regulation_of_protein_kinase_B_signaling_cascade   | _01 | 5   | 0 | 1       | 1        | 0 | 0        | G0: |
| 0051898 | Negative_regulation_of_protein_kinase_B_signaling_cascade   | _01 | 15  | 0 | 1       | 1        | 0 | 0        | G0: |
| 0051899 | Membrane_depolarization                                     | _01 | 6   | 0 | 1       | 1        | 0 | 0        | G0: |
| 0051918 | Negative_regulation_of_fibrinolysis                         | _01 | 11  | 1 | 1       | 1        | 0 | 0.000423 | G0: |
| 0051924 | Regulation_of_calcium_ion_transport                         | _01 | 9   | 1 | 1       | 1        | 0 | 0.000423 | G0: |
| 0051928 | Positive_regulation_of_calcium_ion_transport                | _01 | 13  | 0 | 1       | 1        | 0 | 0        | G0: |
| 0051930 | Regulation_of_sensory_perception_of_pain                    | _01 | 6   | 0 | 1       | 1        | 0 | 0        | G0: |
| 0051965 | Positive_regulation_of_synaptogenesis                       | _01 | 6   | 0 | 1       | 1        | 0 | 0        | G0: |
| 0051967 | Negative_regulation_of_synaptic_transmission,_glutamatergic | _01 | 7   | 1 | 1       | 1        | 0 | 3.9e-05  | G0: |
| 0051968 | Positive_regulation_of_synaptic_transmission,_glutamatergic | _01 | 9   | 0 | 1       | 1        | 0 | 0        | G0: |
| 0055007 | Cardiac_muscle_cell_differentiation                         | _01 | 5   | 0 | 1       | 1        | 0 | 0        | G0: |
| 0055008 | Cardiac_muscle_tissue_morphogenesis                         | _01 | 5   | 0 | 1       | 1        | 0 | 0        | G0: |
| 0055009 | Atrial_cardiac_muscle_tissue_morphogenesis                  | _01 | 19  | 0 | 1       | 1        | 0 | 0        | G0: |
| 0055010 | Ventricular_cardiac_muscle_tissue_morphogenesis             | _01 | 8   | 0 | 1       | 1        | 0 | 0        | G0: |
| 0055015 | Ventricular_cardiac_muscle_cell_development                 | _01 | 12  | 0 | 1       | 1        | 0 | 0        | G0: |
| 0055037 | Recycling_endosome                                          | _01 | 9   | 0 | 1       | 1        | 0 | 0        | G0: |
| 0055038 | Recycling_endosome_membrane                                 | _01 | 6   | 0 | 1       | 1        | 0 | 0        | G0: |
| 0055056 | D-glucose_transmembrane_transporter_activity                | _01 | 7   | 0 | 1       | 1        | 0 | 0        | G0: |
| 0055074 | Calcium_ion_homeostasis                                     | _01 | 404 | 0 | 1       | 1        | 0 | 0        | G0: |
| 0055085 | Transmembrane_transport                                     | _01 | 56  | 0 | 1       | 1        | 0 | 0        | G0: |
| 0055086 | Nucleobase,_nucleoside_and_nucleotide_metabolic_process     | _01 | 10  | 0 | 1       | 1        | 0 | 0        | G0: |
| 0055088 | Lipid_homeostasis                                           | _01 | 7   | 0 | 1       | 1        | 0 | 0        | G0: |
| 0055093 | Response_to_hyperoxia                                       | _01 | 321 | 2 | 0.01498 | 0.529507 | 0 | 0.000231 | G0: |
| 0055114 | Oxidation-reduction_process                                 | _01 | 5   | 0 | 1       | 1        | 0 | 0        | G0: |
| 0055117 | Regulation_of_cardiac_muscle_contraction                    | _01 | 5   | 0 | 1       | 1        | 0 | 0        | G0: |
| 0060017 | Parathyroid_gland_development                               | _01 | 30  | 0 | 1       | 1        | 0 | 0        | G0: |
| 0060021 | Palate_development                                          | _01 | 7   | 0 | 1       | 1        | 0 | 0        | G0: |

|         |                                                              |     |    |   |   |   |   |   |     |
|---------|--------------------------------------------------------------|-----|----|---|---|---|---|---|-----|
| 0060037 | Pharyngeal_system_development                                | _01 | 5  | 0 | 1 | 1 | 0 | 0 | G0: |
| 0060039 | Pericardium_development                                      | _01 | 14 | 0 | 1 | 1 | 0 | 0 | G0: |
| 0060041 | Retina_development_in_camera-type_eye                        | _01 | 9  | 0 | 1 | 1 | 0 | 0 | G0: |
| 0060045 | Positive_regulation_of_cardiac_muscle_cell_proliferation     | _01 | 13 | 0 | 1 | 1 | 0 | 0 | G0: |
| 0060048 | Cardiac_muscle_contraction                                   | _01 | 5  | 0 | 1 | 1 | 0 | 0 | G0: |
| 0060055 | Angiogenesis_involved_in_wound_healing                       | _01 | 5  | 0 | 1 | 1 | 0 | 0 | G0: |
| 0060056 | Mammary_gland_involution                                     | _01 | 29 | 0 | 1 | 1 | 0 | 0 | G0: |
| 0060070 | Canonical_Wnt_receptor_signaling_pathway                     | _01 | 5  | 0 | 1 | 1 | 0 | 0 | G0: |
| 0060071 | Wnt_receptor_signaling_pathway,_planar_cell_polarity_pathway | _01 | 11 | 0 | 1 | 1 | 0 | 0 | G0: |
| 0060079 | Regulation_of_excitatory_postsynaptic_membrane_potential     | _01 | 5  | 0 | 1 | 1 | 0 | 0 | G0: |
| 0060134 | Prepulse_inhibition                                          | _01 | 8  | 0 | 1 | 1 | 0 | 0 | G0: |
| 0060135 | Maternal_process_involved_in_female_pregnancy                | _01 | 5  | 0 | 1 | 1 | 0 | 0 | G0: |
| 0060155 | Platelet_dense_granule_organization                          | _01 | 7  | 0 | 1 | 1 | 0 | 0 | G0: |
| 0060170 | Cilium_membrane                                              | _01 | 8  | 0 | 1 | 1 | 0 | 0 | G0: |
| 0060173 | Limb_development                                             | _01 | 6  | 0 | 1 | 1 | 0 | 0 | G0: |
| 0060174 | Limb_bud_formation                                           | _01 | 6  | 0 | 1 | 1 | 0 | 0 | G0: |
| 0060271 | Cilium_morphogenesis                                         | _01 | 8  | 0 | 1 | 1 | 0 | 0 | G0: |
| 0060325 | Face_morphogenesis                                           | _01 | 8  | 0 | 1 | 1 | 0 | 0 | G0: |
| 0060326 | Cell_chemotaxis                                              | _01 | 7  | 0 | 1 | 1 | 0 | 0 | G0: |
| 0060347 | Heart_trabecula_formation                                    | _01 | 6  | 0 | 1 | 1 | 0 | 0 | G0: |
| 0060349 | Bone_morphogenesis                                           | _01 | 9  | 0 | 1 | 1 | 0 | 0 | G0: |
| 0060389 | Pathway-restricted_SMAD_protein_phosphorylation              | _01 | 6  | 0 | 1 | 1 | 0 | 0 | G0: |
| 0060391 | Positive_regulation_of_SMAD_protein_import_into_nucleus      | _01 | 13 | 0 | 1 | 1 | 0 | 0 | G0: |
| 0060395 | SMAD_protein_signal_transduction                             | _01 | 5  | 0 | 1 | 1 | 0 | 0 | G0: |
| 0060406 | Positive_regulation_of_penile_erection                       | _01 | 7  | 0 | 1 | 1 | 0 | 0 | G0: |
| 0060412 | Ventricular_septum_morphogenesis                             | _01 | 5  | 0 | 1 | 1 | 0 | 0 | G0: |
| 0060425 | Lung_morphogenesis                                           | _01 | 6  | 0 | 1 | 1 | 0 | 0 | G0: |

|         |                                                                                           |   |   |   |   |         |     |  |
|---------|-------------------------------------------------------------------------------------------|---|---|---|---|---------|-----|--|
| 0060426 | Lung_vasculature_development                                                              |   |   |   |   |         |     |  |
| _01     | 6                                                                                         | 1 | 1 | 1 | 0 | 6.3e-05 | G0: |  |
| 0060441 | Epithelial_tube_branching_involved_in_lung_morphogenesis                                  |   |   |   |   |         |     |  |
| _01     | 6                                                                                         | 0 | 1 | 1 | 0 | 0       | G0: |  |
| 0060445 | Branching_involved_in_salivary_gland_morphogenesis                                        |   |   |   |   |         |     |  |
| _01     | 7                                                                                         | 0 | 1 | 1 | 0 | 0       | G0: |  |
| 0060484 | Lung-associated_mesenchyme_development                                                    |   |   |   |   |         |     |  |
| _01     | 5                                                                                         | 0 | 1 | 1 | 0 | 0       | G0: |  |
| 0060527 | Prostate_epithelial_cord_arborization_involved_in_prostate_glandular_acinus_morphogenesis |   |   |   |   |         |     |  |
| _01     | 10                                                                                        | 0 | 1 | 1 | 0 | 0       | G0: |  |
| 0060548 | Negative_regulation_of_cell_death                                                         |   |   |   |   |         |     |  |
| _01     | 5                                                                                         | 0 | 1 | 1 | 0 | 0       | G0: |  |
| 0060612 | Adipose_tissue_development                                                                |   |   |   |   |         |     |  |
| _01     | 6                                                                                         | 0 | 1 | 1 | 0 | 0       | G0: |  |
| 0060644 | Mammary_gland_epithelial_cell_differentiation                                             |   |   |   |   |         |     |  |
| _01     | 5                                                                                         | 0 | 1 | 1 | 0 | 0       | G0: |  |
| 0060666 | Dichotomous_subdivision_of_terminal_units_involved_in_salivary_gland_branching            |   |   |   |   |         |     |  |
| _01     | 5                                                                                         | 0 | 1 | 1 | 0 | 0       | G0: |  |
| 0060670 | Branching_involved_in_embryonic_placenta_morphogenesis                                    |   |   |   |   |         |     |  |
| _01     | 5                                                                                         | 0 | 1 | 1 | 0 | 0       | G0: |  |
| 0060687 | Regulation_of_branching_involved_in_prostate_gland_morphogenesis                          |   |   |   |   |         |     |  |
| _01     | 7                                                                                         | 0 | 1 | 1 | 0 | 0       | G0: |  |
| 0060707 | Trophoblast_giant_cell_differentiation                                                    |   |   |   |   |         |     |  |
| _01     | 11                                                                                        | 0 | 1 | 1 | 0 | 0       | G0: |  |
| 0060716 | Labyrinthine_layer_blood_vessel_development                                               |   |   |   |   |         |     |  |
| _01     | 7                                                                                         | 1 | 1 | 1 | 0 | 6.3e-05 | G0: |  |
| 0060740 | Prostate_gland_epithelium_morphogenesis                                                   |   |   |   |   |         |     |  |
| _01     | 7                                                                                         | 0 | 1 | 1 | 0 | 0       | G0: |  |
| 0060749 | Mammary_gland_alveolus_development                                                        |   |   |   |   |         |     |  |
| _01     | 5                                                                                         | 0 | 1 | 1 | 0 | 0       | G0: |  |
| 0060828 | Regulation_of_canonical_Wnt_receptor_signaling_pathway                                    |   |   |   |   |         |     |  |
| _01     | 5                                                                                         | 0 | 1 | 1 | 0 | 0       | G0: |  |
| 0061036 | Positive_regulation_of_cartilage_development                                              |   |   |   |   |         |     |  |
| _01     | 6                                                                                         | 0 | 1 | 1 | 0 | 0       | G0: |  |
| 0061202 | Clathrin_sculpted_gamma-aminobutyric_acid_transport_vesicle_membrane                      |   |   |   |   |         |     |  |
| _01     | 5                                                                                         | 0 | 1 | 1 | 0 | 0       | G0: |  |
| 0070016 | Armadillo_repeat_domain_binding                                                           |   |   |   |   |         |     |  |
| _01     | 7                                                                                         | 0 | 1 | 1 | 0 | 0       | G0: |  |
| 0070064 | Proline-rich_region_binding                                                               |   |   |   |   |         |     |  |
| _01     | 5                                                                                         | 0 | 1 | 1 | 0 | 0       | G0: |  |
| 0070198 | Protein_localization_to_chromosome,_telomeric_region                                      |   |   |   |   |         |     |  |
| _01     | 5                                                                                         | 0 | 1 | 1 | 0 | 0       | G0: |  |
| 0070207 | Protein_homotrimerization                                                                 |   |   |   |   |         |     |  |
| _01     | 6                                                                                         | 0 | 1 | 1 | 0 | 0       | G0: |  |
| 0070301 | Cellular_response_to_hydrogen_peroxide                                                    |   |   |   |   |         |     |  |
| _01     | 9                                                                                         | 0 | 1 | 1 | 0 | 0       | G0: |  |
| 0070328 | Triglyceride_homeostasis                                                                  |   |   |   |   |         |     |  |
| _01     | 10                                                                                        | 0 | 1 | 1 | 0 | 0       | G0: |  |

|         |                                              |   |   |   |   |          |  |     |
|---------|----------------------------------------------|---|---|---|---|----------|--|-----|
| 0070330 | Aromatase_activity                           |   |   |   |   |          |  |     |
| _01     | 5                                            | 0 | 1 | 1 | 0 | 0        |  | GO: |
| 0070371 | ERK1_and_ERK2_cascade                        |   |   |   |   |          |  |     |
| _01     | 9                                            | 0 | 1 | 1 | 0 | 0        |  | GO: |
| 0070373 | Negative_regulation_of_ERK1_and_ERK2_cascade |   |   |   |   |          |  |     |
| _01     | 29                                           | 0 | 1 | 1 | 0 | 0        |  | GO: |
| 0070374 | Positive_regulation_of_ERK1_and_ERK2_cascade |   |   |   |   |          |  |     |
| _01     | 7                                            | 0 | 1 | 1 | 0 | 0        |  | GO: |
| 0070403 | NAD_binding                                  |   |   |   |   |          |  |     |
| _01     | 8                                            | 0 | 1 | 1 | 0 | 0        |  | GO: |
| 0070411 | I-SMAD_binding                               |   |   |   |   |          |  |     |
| _01     | 9                                            | 0 | 1 | 1 | 0 | 0        |  | GO: |
| 0070412 | R-SMAD_binding                               |   |   |   |   |          |  |     |
| _01     | 24                                           | 0 | 1 | 1 | 0 | 0        |  | GO: |
| 0070469 | Respiratory_chain                            |   |   |   |   |          |  |     |
| _01     | 10                                           | 0 | 1 | 1 | 0 | 0        |  | GO: |
| 0070491 | Repressing_transcription_factor_binding      |   |   |   |   |          |  |     |
| _01     | 9                                            | 0 | 1 | 1 | 0 | 0        |  | GO: |
| 0070534 | Protein_K63-linked_ubiquitination            |   |   |   |   |          |  |     |
| _01     | 6                                            | 0 | 1 | 1 | 0 | 0        |  | GO: |
| 0070536 | Protein_K63-linked_deubiquitination          |   |   |   |   |          |  |     |
| _01     | 8                                            | 0 | 1 | 1 | 0 | 0        |  | GO: |
| 0070542 | Response_to_fatty_acid                       |   |   |   |   |          |  |     |
| _01     | 16                                           | 0 | 1 | 1 | 0 | 0        |  | GO: |
| 0070555 | Response_to_interleukin-1                    |   |   |   |   |          |  |     |
| _01     | 5                                            | 0 | 1 | 1 | 0 | 0        |  | GO: |
| 0070652 | HAUS_complex                                 |   |   |   |   |          |  |     |
| _01     | 6                                            | 0 | 1 | 1 | 0 | 0        |  | GO: |
| 0070688 | MLL5-L_complex                               |   |   |   |   |          |  |     |
| _01     | 5                                            | 0 | 1 | 1 | 0 | 0        |  | GO: |
| 0070695 | FHF_complex                                  |   |   |   |   |          |  |     |
| _01     | 7                                            | 0 | 1 | 1 | 0 | 0        |  | GO: |
| 0070742 | C2H2_zinc_finger_domain_binding              |   |   |   |   |          |  |     |
| _01     | 5                                            | 0 | 1 | 1 | 0 | 0        |  | GO: |
| 0070761 | Pre-snoRNP_complex                           |   |   |   |   |          |  |     |
| _01     | 5                                            | 0 | 1 | 1 | 0 | 0        |  | GO: |
| 0070776 | MOZ/MORF_histone_acetyltransferase_complex   |   |   |   |   |          |  |     |
| _01     | 16                                           | 0 | 1 | 1 | 0 | 0        |  | GO: |
| 0070830 | Tight_junction_assembly                      |   |   |   |   |          |  |     |
| _01     | 5                                            | 0 | 1 | 1 | 0 | 0        |  | GO: |
| 0070848 | Response_to_growth_factor_stimulus           |   |   |   |   |          |  |     |
| _01     | 6                                            | 0 | 1 | 1 | 0 | 0        |  | GO: |
| 0070888 | E-box_binding                                |   |   |   |   |          |  |     |
| _01     | 5                                            | 1 | 1 | 1 | 0 | 5.2e-05  |  | GO: |
| 0070934 | CRD-mediated_mRNA_stabilization              |   |   |   |   |          |  |     |
| _01     | 12                                           | 0 | 1 | 1 | 0 | 0        |  | GO: |
| 0070936 | Protein_K48-linked_ubiquitination            |   |   |   |   |          |  |     |
| _01     | 5                                            | 1 | 1 | 1 | 0 | 5.2e-05  |  | GO: |
| 0070937 | CRD-mediated_mRNA_stability_complex          |   |   |   |   |          |  |     |
| _01     | 15                                           | 1 | 1 | 1 | 0 | 0.000423 |  | GO: |
| 0070979 | Protein_K11-linked_ubiquitination            |   |   |   |   |          |  |     |
| _01     | 12                                           | 0 | 1 | 1 | 0 | 0        |  | GO: |
| 0071044 | Histone_mRNA_catabolic_process               |   |   |   |   |          |  |     |
| _01     | 6                                            | 0 | 1 | 1 | 0 | 0        |  | GO: |



|         |                                                                 |   |   |   |   |   |  |     |
|---------|-----------------------------------------------------------------|---|---|---|---|---|--|-----|
| 0071108 | Protein_K48-linked_deubiquitination                             |   |   |   |   |   |  |     |
| _01     | 6                                                               | 0 | 1 | 1 | 0 | 0 |  | GO: |
| 0071157 | Negative_regulation_of_cell_cycle_arrest                        |   |   |   |   |   |  |     |
| _01     | 5                                                               | 0 | 1 | 1 | 0 | 0 |  | GO: |
| 0071203 | WASH_complex                                                    |   |   |   |   |   |  |     |
| _01     | 12                                                              | 0 | 1 | 1 | 0 | 0 |  | GO: |
| 0071222 | Cellular_response_to_lipopolysaccharide                         |   |   |   |   |   |  |     |
| _01     | 6                                                               | 0 | 1 | 1 | 0 | 0 |  | GO: |
| 0071230 | Cellular_response_to_amino_acid_stimulus                        |   |   |   |   |   |  |     |
| _01     | 13                                                              | 0 | 1 | 1 | 0 | 0 |  | GO: |
| 0071300 | Cellular_response_to_retinoic_acid                              |   |   |   |   |   |  |     |
| _01     | 15                                                              | 0 | 1 | 1 | 0 | 0 |  | GO: |
| 0071339 | MLL1_complex                                                    |   |   |   |   |   |  |     |
| _01     | 5                                                               | 0 | 1 | 1 | 0 | 0 |  | GO: |
| 0071347 | Cellular_response_to_interleukin-1                              |   |   |   |   |   |  |     |
| _01     | 11                                                              | 0 | 1 | 1 | 0 | 0 |  | GO: |
| 0071363 | Cellular_response_to_growth_factor_stimulus                     |   |   |   |   |   |  |     |
| _01     | 7                                                               | 0 | 1 | 1 | 0 | 0 |  | GO: |
| 0071407 | Cellular_response_to_organic_cyclic_substance                   |   |   |   |   |   |  |     |
| _01     | 7                                                               | 0 | 1 | 1 | 0 | 0 |  | GO: |
| 0071445 | Cellular_response_to_protein_stimulus                           |   |   |   |   |   |  |     |
| _01     | 7                                                               | 0 | 1 | 1 | 0 | 0 |  | GO: |
| 0071456 | Cellular_response_to_hypoxia                                    |   |   |   |   |   |  |     |
| _01     | 5                                                               | 0 | 1 | 1 | 0 | 0 |  | GO: |
| 0071560 | Cellular_response_to_transforming_growth_factor_beta_stimulus   |   |   |   |   |   |  |     |
| _01     | 8                                                               | 0 | 1 | 1 | 0 | 0 |  | GO: |
| 0071564 | NpBAF_complex                                                   |   |   |   |   |   |  |     |
| _01     | 9                                                               | 0 | 1 | 1 | 0 | 0 |  | GO: |
| 0071565 | NBAF_complex                                                    |   |   |   |   |   |  |     |
| _01     | 5                                                               | 0 | 1 | 1 | 0 | 0 |  | GO: |
| 0072357 | PTW/PP1_phosphatase_complex                                     |   |   |   |   |   |  |     |
| _01     | 7                                                               | 0 | 1 | 1 | 0 | 0 |  | GO: |
| 0080008 | CUL4_RING_ubiquitin_ligase_complex                              |   |   |   |   |   |  |     |
| _01     | 6                                                               | 0 | 1 | 1 | 0 | 0 |  | GO: |
| 0080025 | Phosphatidylinositol-3,5-bisphosphate_binding                   |   |   |   |   |   |  |     |
| _01     | 31                                                              | 0 | 1 | 1 | 0 | 0 |  | GO: |
| 0090090 | Negative_regulation_of_canonical_Wnt_receptor_signaling_pathway |   |   |   |   |   |  |     |
| _01     | 5                                                               | 0 | 1 | 1 | 0 | 0 |  | GO: |
| 0090136 | Epithelial_cell-cell_adhesion                                   |   |   |   |   |   |  |     |
| _01     | 16                                                              | 0 | 1 | 1 | 0 | 0 |  | GO: |
| 0090263 | Positive_regulation_of_canonical_Wnt_receptor_signaling_pathway |   |   |   |   |   |  |     |
| _01     | 5                                                               | 0 | 1 | 1 | 0 | 0 |  | GO: |
| 0090286 | Cytoskeletal_anchoring_at_nuclear_membrane                      |   |   |   |   |   |  |     |

---

## II. Interval-Gene-Target Summary

---

| _02 | INTERVAL | GENE_LOC              | GENE_ID | GENE_DESC | TARGET                | P |
|-----|----------|-----------------------|---------|-----------|-----------------------|---|
| _02 | int20:   | chrM:7119859..7845353 |         |           | chrM:7794400..7841032 |   |

51433 ANAPC5 A G0:0000075 Cell\_cycle\_checkpoint 1  
\_02 int20:chrM:7119859..7845353 chrM:7794400..7841032  
51433 ANAPC5 A G0:0000086 G2/  
M\_transition\_of\_mitotic\_cell\_cycle 1  
\_02 int9:chr8:16013494..16106285 chr8:16077537..16083232  
3169 FOXA1 F G0:0000122  
Negative\_regulation\_of\_transcription\_from\_RNA\_polymerase\_II\_promoter  
1.1e-05  
\_02 int10:chr8:63223904..63813192 chr8:63705038..63706981  
145258 GSC G G0:0000122  
Negative\_regulation\_of\_transcription\_from\_RNA\_polymerase\_II\_promoter  
1.1e-05  
\_02 int13:chr16:45965023..46373321 chr16:46053149..46131685  
3660 IRF2 I G0:0000122  
Negative\_regulation\_of\_transcription\_from\_RNA\_polymerase\_II\_promoter  
1.1e-05  
\_02 int16:chrX:24666408..24763994 chrX:24599559..24692559  
6304 SATB1 S G0:0000122  
Negative\_regulation\_of\_transcription\_from\_RNA\_polymerase\_II\_promoter  
1.1e-05  
\_02 int20:chrM:7119859..7845353 chrM:7145120..7148771  
79369 B3GNT4 U G0:0000139 Golgi\_membrane 1  
\_02 int3:chr6:18012525..18106914 chr6:18010887..18029186  
9344 TAOK2 T G0:0000186 Activation\_of\_MAPKK\_activity  
1  
\_02 int3:chr6:18012525..18106914 chr6:18085139..18092858  
5531 PPP4C P G0:0000226  
Microtubule\_cytoskeleton\_organization 1  
\_02 int20:chrM:7119859..7845353 chrM:7794400..7841032  
51433 ANAPC5 A G0:0000278 Mitotic\_cell\_cycle 1  
\_02 int5:chr7:16160915..16235033 chr7:16233741..16292928  
1660 DHX9 D G0:0000398 Nuclear\_mRNA\_splicing,\_via\_spliceosome  
1  
\_02 int16:chrX:24666408..24763994 chrX:24599559..24692559  
6304 SATB1 S G0:0000785 Chromatin 1  
\_02 int7:chr7:19633367..19714459 chr7:19668098..19674935  
5743 PTGS2 P G0:0001516  
Prostaglandin\_biosynthetic\_process 1  
\_02 int0:chr4:31133158..31204643 chr4:30515861..31557604  
10718 NRG3 N G0:0001558 Regulation\_of\_cell\_growth  
9.99999e-06  
\_02 int3:chr6:18012525..18106914 chr6:18010887..18029186  
9344 TAOK2 T G0:0001558 Regulation\_of\_cell\_growth  
9.99999e-06  
\_02 int8:chr7:22714810..22804810 chr7:22772438..23143385  
60676 PAPP2 P G0:0001558 Regulation\_of\_cell\_growth  
9.99999e-06  
\_02 int10:chr8:63223904..63813192 chr8:63386661..63400389  
5265 SERPINA1 S G0:0001666 Response\_to\_hypoxia 1  
\_02 int3:chr6:18012525..18106914 chr6:18093188..18098314  
6911 TBX6 T G0:0001707 Mesoderm\_formation 1  
\_02 int3:chr6:18012525..18106914 chr6:18093188..18098314  
6911 TBX6 T G0:0001708 Cell\_fate\_specification 1  
\_02 int10:chr8:63223904..63813192 chr8:63386661..63400389

5265 SERPINA1 S GO:0002020 Protease\_binding 1  
\_02 int10:chr8:63223904..63813192 chr8:63567114..63577016  
5104 SERPINA5 S GO:0002020 Protease\_binding 1  
\_02 int3:chr6:18012525..18106914 chr6:18069904..18083053  
226 ALDOA A GO:0002576 Platelet\_degranulation  
0.000348  
\_02 int10:chr8:63223904..63813192 chr8:63386661..63400389  
5265 SERPINA1 S GO:0002576 Platelet\_degranulation  
0.000348  
\_02 int20:chrM:7119859..7845353 chrM:7264614..7295832  
605 BCL7A B GO:0003674 Molecular\_function 1  
\_02 int18:chrX:48440818..48536955 chrX:48407005..48456332  
170506 DHX36 D GO:0003676 Nucleic\_acid\_binding 1  
\_02 int9:chr8:16013494..16106285 chr8:16077537..16083232  
3169 FOXA1 F GO:0003690 Double-stranded\_DNA\_binding  
0.0012  
\_02 int16:chrX:24666408..24763994 chrX:24599559..24692559  
6304 SATB1 S GO:0003690 Double-stranded\_DNA\_binding  
0.0012  
\_02 int3:chr6:18012525..18106914 chr6:18093188..18098314  
6911 TBX6 T GO:0003700 Sequence-specific\_DNA\_binding\_transcription\_factor\_activity 3e-06  
\_02 int9:chr8:16013494..16106285 chr8:16077537..16083232  
3169 FOXA1 F GO:0003700 Sequence-specific\_DNA\_binding\_transcription\_factor\_activity 3e-06  
\_02 int10:chr8:63223904..63813192 chr8:63705038..63706981  
145258 GSC G GO:0003700 Sequence-specific\_DNA\_binding\_transcription\_factor\_activity 3e-06  
\_02 int13:chr16:45965023..46373321 chr16:46053149..46131685  
3660 IRF2 I GO:0003700 Sequence-specific\_DNA\_binding\_transcription\_factor\_activity 3e-06  
\_02 int16:chrX:24666408..24763994 chrX:24599559..24692559  
6304 SATB1 S GO:0003700 Sequence-specific\_DNA\_binding\_transcription\_factor\_activity 3e-06  
\_02 int20:chrM:7119859..7845353 chrM:7223951..7225043  
652963 BTF3P12 B GO:0003700 Sequence-specific\_DNA\_binding\_transcription\_factor\_activity 3e-06  
\_02 int13:chr16:45965023..46373321 chr16:46053149..46131685  
3660 IRF2 I GO:0003702 RNA\_polymerase\_II\_transcription\_factor\_activity 1  
\_02 int9:chr8:16013494..16106285 chr8:16077537..16083232  
3169 FOXA1 F GO:0003704 Specific\_RNA\_polymerase\_II\_transcription\_factor\_activity 1  
\_02 int9:chr8:16013494..16106285 chr8:16077537..16083232  
3169 FOXA1 F GO:0003705 Sequence-specific\_enhancer\_binding\_RNA\_polymerase\_II\_transcription\_factor\_activity 1  
\_02 int20:chrM:7119859..7845353 chrM:7443827..7467087  
23067 SETD1B S GO:0003723 RNA\_binding 1  
\_02 int5:chr7:16160915..16235033 chr7:16233741..16292928  
1660 DHX9 D GO:0003724 RNA\_helicase\_activity 1  
\_02 int5:chr7:16160915..16235033 chr7:16233741..16292928  
1660 DHX9 D GO:0003725 Double-stranded\_RNA\_binding 1  
\_02 int3:chr6:18012525..18106914 chr6:18069904..18083053

226 ALDOA A GO:0003779 Actin\_binding 0.020267  
\_02 int11:chr10:69076487..69161721 chr10:69056997..69142988  
119 ADD2 A GO:0003779 Actin\_binding 0.020267  
\_02 int20:chrM:7119859..7845353 chrM:7478035..7489428  
54509 RHOF R GO:0003924 GTPase\_activity 1  
\_02 int5:chr7:16160915..16235033 chr7:16233741..16292928  
1660 DHX9 D GO:0004003 ATP-dependent\_DNA\_helicase\_activity  
1  
\_02 int5:chr7:16160915..16235033 chr7:16233741..16292928  
1660 DHX9 D GO:0004004 ATP-dependent\_RNA\_helicase\_activity  
1  
\_02 int2:chr5:29189236..29284352 chr5:29187858..29196161  
4316 MMP7 M GO:0004222 Metalloendopeptidase\_activity 0.001655  
\_02 int8:chr7:22714810..22804810 chr7:22772438..23143385  
60676 PAPP2 P GO:0004222 Metalloendopeptidase\_activity  
0.001655  
\_02 int18:chrX:48440818..48536955 chrX:48407005..48456332  
170506 DHX36 D GO:0004386 Helicase\_activity 1  
\_02 int7:chr7:19633367..19714459 chr7:19668098..19674935  
5743 PTGS2 P GO:0004601 Peroxidase\_activity 1  
\_02 int3:chr6:18012525..18106914 chr6:18010887..18029186  
9344 TAOK2 T GO:0004674 Protein\_serine/  
threonine\_kinase\_activity 1  
\_02 int3:chr6:18012525..18106914 chr6:18085139..18092858  
5531 PPP4C P GO:0004722 Protein\_serine/  
threonine\_phosphatase\_activity 1  
\_02 int20:chrM:7119859..7845353 chrM:7794400..7841032  
51433 ANAPC5 A GO:0004842 Ubiquitin-  
protein\_ligase\_activity 1  
\_02 int10:chr8:63223904..63813192 chr8:63324149..63341782  
866 SERPINA6 S GO:0004867 Serine-  
type\_endopeptidase\_inhibitor\_activity 1  
\_02 int10:chr8:63223904..63813192 chr8:63379422..63381819  
390502 SERPINA2 S GO:0004867 Serine-  
type\_endopeptidase\_inhibitor\_activity 1  
\_02 int10:chr8:63223904..63813192 chr8:63386661..63400389  
5265 SERPINA1 S GO:0004867 Serine-  
type\_endopeptidase\_inhibitor\_activity 1  
\_02 int10:chr8:63223904..63813192 chr8:63436708..63453265  
256394 SERPINA11 S GO:0004867 Serine-  
type\_endopeptidase\_inhibitor\_activity 1  
\_02 int10:chr8:63223904..63813192 chr8:63473300..63488592  
327657 SERPINA9 S GO:0004867 Serine-  
type\_endopeptidase\_inhibitor\_activity 1  
\_02 int10:chr8:63223904..63813192 chr8:63497827..63521295  
145264 SERPINA12 S GO:0004867 Serine-  
type\_endopeptidase\_inhibitor\_activity 1  
\_02 int10:chr8:63223904..63813192 chr8:63552073..63560608  
5267 SERPINA4 S GO:0004867 Serine-  
type\_endopeptidase\_inhibitor\_activity 1  
\_02 int10:chr8:63223904..63813192 chr8:63567114..63577016  
5104 SERPINA5 S GO:0004867 Serine-  
type\_endopeptidase\_inhibitor\_activity 1  
\_02 int10:chr8:63223904..63813192 chr8:63588248..63596955

|          |                                       |   |            |                                    |          |  |
|----------|---------------------------------------|---|------------|------------------------------------|----------|--|
| 12       | SERPINA3                              | S | G0:0004867 | Serine-                            |          |  |
|          | type_endopeptidase_inhibitor_activity |   |            |                                    | 1        |  |
| _02      | int18:chrX:48440818..48536955         |   |            | chrX:48471675..48535300            |          |  |
| 344758   | GPR149                                | G | G0:0004872 | Receptor_activity                  | 1        |  |
| _02      | int18:chrX:48440818..48536955         |   |            | chrX:48471675..48535300            |          |  |
| 344758   | GPR149                                | G | G0:0004930 | G-                                 |          |  |
|          | protein_coupled_receptor_activity     |   |            |                                    | 1        |  |
| _02      | int12:chr14:42191677..42265654        |   |            | chr14:42217642..42513368           |          |  |
| 1124     | CHN2                                  | C | G0:0005070 | SH3/SH2_adaptor_activity           | 1        |  |
| _02      | int12:chr14:42191677..42265654        |   |            | chr14:42217642..42513368           |          |  |
| 1124     | CHN2                                  | C | G0:0005096 | GTPase_activator_activity          | 1        |  |
| _02      | int20:chrM:7119859..7845353           |   |            | chrM:7173150..7175594              |          |  |
| 386653   | IL31                                  | I | G0:0005125 | Cytokine_activity                  | 1        |  |
| _02      | int11:chr10:69076487..69161721        |   |            | chr10:69056997..69142988           |          |  |
| 119      | ADD2                                  | A | G0:0005198 | Structural_molecule_activity       | 1        |  |
| _02      | int3:chr6:18012525..18106914          |   |            | chr6:18041311..18046793            |          |  |
| 8448     | DOC2A                                 | D | G0:0005215 | Transporter_activity               | 1        |  |
| _02      | int20:chrM:7119859..7845353           |   |            | chrM:7584448..7599633              |          |  |
| 84876    | ORAI1                                 | O | G0:0005216 | Ion_channel_activity               | 1        |  |
| _02      | int3:chr6:18012525..18106914          |   |            | chr6:18041311..18046793            |          |  |
| 8448     | DOC2A                                 | D | G0:0005488 | Binding                            | 0.023215 |  |
| _02      | int20:chrM:7119859..7845353           |   |            | chrM:7794400..7841032              |          |  |
| 51433    | ANAPC5                                | A | G0:0005488 | Binding                            | 0.023215 |  |
| _02      | int10:chr8:63223904..63813192         |   |            | chr8:63324149..63341782            |          |  |
| 866      | SERPINA6                              | S | G0:0005496 | Steroid_binding                    | 1        |  |
| _02      | int20:chrM:7119859..7845353           |   |            | chrM:7308885..7375053              |          |  |
| 144406   | WDR66                                 | W | G0:0005509 | Calcium_ion_binding                | 1        |  |
| _02      | int11:chr10:69076487..69161721        |   |            | chr10:69056997..69142988           |          |  |
| 119      | ADD2                                  | A | G0:0005516 | Calmodulin_binding                 | 1        |  |
| _02      | int3:chr6:18012525..18106914          |   |            | chr6:18010887..18029186            |          |  |
| 9344     | TAOK2                                 | T | G0:0005524 | ATP_binding                        | 0.047166 |  |
| _02      | int5:chr7:16160915..16235033          |   |            | chr7:16233741..16292928            |          |  |
| 1660     | DHX9                                  | D | G0:0005524 | ATP_binding                        | 0.047166 |  |
| _02      | int18:chrX:48440818..48536955         |   |            | chrX:48407005..48456332            |          |  |
| 170506   | DHX36                                 | D | G0:0005524 | ATP_binding                        | 0.047166 |  |
| _02      | int20:chrM:7119859..7845353           |   |            | chrM:7478035..7489428              |          |  |
| 54509    | RHOF                                  | R | G0:0005525 | GTP_binding                        | 1        |  |
| _02      | int10:chr8:63223904..63813192         |   |            | chr8:63567114..63577016            |          |  |
| 5104     | SERPINA5                              | S | G0:0005539 | Glycosaminoglycan_binding          |          |  |
| 1        |                                       |   |            |                                    |          |  |
| _02      | int3:chr6:18012525..18106914          |   |            | chr6:18041311..18046793            |          |  |
| 8448     | DOC2A                                 | D | G0:0005544 | Calcium-                           |          |  |
|          | dependent_phospholipid_binding        |   |            |                                    | 1        |  |
| _02      | int8:chr7:22714810..22804810          |   |            | chr7:22455294..22753932            |          |  |
| 460      | ASTN1                                 | A | G0:0005575 | Cellular_component                 | 0.030622 |  |
| _02      | int20:chrM:7119859..7845353           |   |            | chrM:7264614..7295832              |          |  |
| 605      | BCL7A                                 | B | G0:0005575 | Cellular_component                 | 0.030622 |  |
| _02      | int2:chr5:29189236..29284352          |   |            | chr5:29187858..29196161            |          |  |
| 4316     | MMP7                                  | M | G0:0005578 | Proteinaceous_extracellular_matrix |          |  |
| 0.011648 |                                       |   |            |                                    |          |  |
| _02      | int10:chr8:63223904..63813192         |   |            | chr8:63386661..63400389            |          |  |
| 5265     | SERPINA1                              | S | G0:0005578 |                                    |          |  |
|          | Proteinaceous_extracellular_matrix    |   |            |                                    | 0.011648 |  |
| _02      | int2:chr5:29189236..29284352          |   |            | chr5:29187858..29196161            |          |  |

|        |          |   |                                |                                   |           |
|--------|----------|---|--------------------------------|-----------------------------------|-----------|
| 4316   | MMP7     | M | GO:0005615                     | Extracellular_space               | 0.003443  |
| _02    |          |   | int10:chr8:63223904..63813192  | chr8:63324149..63341782           |           |
| 866    | SERPINA6 | S | GO:0005615                     | Extracellular_space               | 0.003443  |
| _02    |          |   | int10:chr8:63223904..63813192  | chr8:63386661..63400389           |           |
| 5265   | SERPINA1 | S | GO:0005615                     | Extracellular_space               | 0.003443  |
| _02    |          |   | int10:chr8:63223904..63813192  | chr8:63552073..63560608           |           |
| 5267   | SERPINA4 | S | GO:0005615                     | Extracellular_space               | 0.003443  |
| _02    |          |   | int20:chrM:7119859..7845353    | chrM:7173150..7175594             |           |
| 386653 | IL31     | I | GO:0005615                     | Extracellular_space               | 0.003443  |
| _02    |          |   | int5:chr7:16160915..16235033   | chr7:16233741..16292928           |           |
| 1660   | DHX9     | D | GO:0005654                     | Nucleoplasm                       | 0.002715  |
| _02    |          |   | int16:chrX:24666408..24763994  | chrX:24599559..24692559           |           |
| 6304   | SATB1    | S | GO:0005654                     | Nucleoplasm                       | 0.002715  |
| _02    |          |   | int20:chrM:7119859..7845353    | chrM:7794400..7841032             |           |
| 51433  | ANAPC5   | A | GO:0005654                     | Nucleoplasm                       | 0.002715  |
| _02    |          |   | int9:chr8:16013494..16106285   | chr8:16077537..16083232           |           |
| 3169   | FOXA1    | F | GO:0005667                     | Transcription_factor_complex      | 0.000119  |
| _02    |          |   | int10:chr8:63223904..63813192  | chr8:63705038..63706981           |           |
| 145258 | GSC      | G | GO:0005667                     | Transcription_factor_complex      | 0.000119  |
| _02    |          |   | int11:chr10:69076487..69161721 | chr10:69148923..69162939          |           |
| 344018 | FIGLA    | F | GO:0005667                     | Transcription_factor_complex      | 0.000119  |
| _02    |          |   | int20:chrM:7119859..7845353    | chrM:7794400..7841032             |           |
| 51433  | ANAPC5   | A | GO:0005680                     | Anaphase-promoting_complex        | 1         |
| _02    |          |   | int20:chrM:7119859..7845353    | chrM:7443827..7467087             |           |
| 23067  | SETD1B   | S | GO:0005694                     | Chromosome                        | 1         |
| _02    |          |   | int16:chrX:24666408..24763994  | chrX:24599559..24692559           |           |
| 6304   | SATB1    | S | GO:0005720                     | Nuclear_heterochromatin           | 1         |
| _02    |          |   | int3:chr6:18012525..18106914   | chr6:18010887..18029186           |           |
| 9344   | TAOK2    | T | GO:0005730                     | Nucleolus                         | 0.001055  |
| _02    |          |   | int3:chr6:18012525..18106914   | chr6:18098760..18102068           |           |
| 83719  | YPEL3    | Y | GO:0005730                     | Nucleolus                         | 0.001055  |
| _02    |          |   | int5:chr7:16160915..16235033   | chr7:16233741..16292928           |           |
| 1660   | DHX9     | D | GO:0005730                     | Nucleolus                         | 0.001055  |
| _02    |          |   | int13:chr16:45965023..46373321 | chr16:46053149..46131685          |           |
| 3660   | IRF2     | I | GO:0005730                     | Nucleolus                         | 0.001055  |
| _02    |          |   | int20:chrM:7119859..7845353    | chrM:7443827..7467087             |           |
| 23067  | SETD1B   | S | GO:0005730                     | Nucleolus                         | 0.001055  |
| _02    |          |   | int20:chrM:7119859..7845353    | chrM:7625403..7746298             |           |
| 84678  | KDM2B    | L | GO:0005730                     | Nucleolus                         | 0.001055  |
| _02    |          |   | int20:chrM:7119859..7845353    | chrM:7123780..7144993             |           |
| 56616  | DIABLO   | D | GO:0005739                     | Mitochondrion                     | 1         |
| _02    |          |   | int20:chrM:7119859..7845353    | chrM:7123780..7144993             |           |
| 56616  | DIABLO   | D | GO:0005758                     | Mitochondrial_intermembrane_space | 1         |
| _02    |          |   | int3:chr6:18012525..18106914   | chr6:18041311..18046793           |           |
| 8448   | DOC2A    | D | GO:0005764                     | Lysosome                          | 1         |
| _02    |          |   | int3:chr6:18012525..18106914   | chr6:18053839..18057610           |           |
| 83723  | FAM57B   | F | GO:0005783                     | Endoplasmic_reticulum             | 0.0593539 |
| _02    |          |   | int7:chr7:19633367..19714459   | chr7:19668098..19674935           |           |

5743 PTGS2 P GO:0005783 Endoplasmic\_reticulum  
0.0593539  
\_02 int7:chr7:19633367..19714459 chr7:19668098..19674935  
5743 PTGS2 P GO:0005788 Endoplasmic\_reticulum\_lumen  
1  
\_02 int7:chr7:19633367..19714459 chr7:19668098..19674935  
5743 PTGS2 P GO:0005789 Endoplasmic\_reticulum\_membrane  
1  
\_02 int7:chr7:19633367..19714459 chr7:19668098..19674935  
5743 PTGS2 P GO:0005792 Microsome 1  
\_02 int20:chrM:7119859..7845353 chrM:7145120..7148771  
79369 B3GNT4 U GO:0005794 Golgi\_apparatus 1  
\_02 int3:chr6:18012525..18106914 chr6:18085139..18092858  
5531 PPP4C P GO:0005813 Centrosome 0.00338  
\_02 int5:chr7:16160915..16235033 chr7:16233741..16292928  
1660 DHX9 D GO:0005813 Centrosome 0.00338  
\_02 int3:chr6:18012525..18106914 chr6:18010887..18029186  
9344 TAOK2 T GO:0005856 Cytoskeleton 0.00865799  
\_02 int3:chr6:18012525..18106914 chr6:18085139..18092858  
5531 PPP4C P GO:0005856 Cytoskeleton 0.00865799  
\_02 int11:chr10:69076487..69161721 chr10:69056997..69142988  
119 ADD2 A GO:0005856 Cytoskeleton 0.00865799  
\_02 int20:chrM:7119859..7845353 chrM:7478035..7489428  
54509 RHOF R GO:0005856 Cytoskeleton 0.00865799  
\_02 int0:chr4:31133158..31204643 chr4:30515861..31557604  
10718 NRG3 N GO:0005887 Integral\_to\_plasma\_membrane 0.111196  
\_02 int20:chrM:7119859..7845353 chrM:7584448..7599633  
84876 ORAI1 O GO:0005887 Integral\_to\_plasma\_membrane  
0.111196  
\_02 int7:chr7:19633367..19714459 chr7:19668098..19674935  
5743 PTGS2 P GO:0005901 Caveola 1  
\_02 int13:chr16:45965023..46373321 chr16:46053149..46131685  
3660 IRF2 I GO:0005925 Focal\_adhesion 1  
\_02 int3:chr6:18012525..18106914 chr6:18069904..18083053  
226 ALDOA A GO:0005975 Carbohydrate\_metabolic\_process  
0.004555  
\_02 int5:chr7:16160915..16235033 chr7:16190066..16223809  
80896 NPL N GO:0005975 Carbohydrate\_metabolic\_process 0.004555  
\_02 int3:chr6:18012525..18106914 chr6:18069904..18083053  
226 ALDOA A GO:0006000 Fructose\_metabolic\_process  
1  
\_02 int3:chr6:18012525..18106914 chr6:18069904..18083053  
226 ALDOA A GO:0006006 Glucose\_metabolic\_process  
0.000428  
\_02 int10:chr8:63223904..63813192 chr8:63497827..63521295  
145264 SERPINA12 S GO:0006006 Glucose\_metabolic\_process  
0.000428  
\_02 int3:chr6:18012525..18106914 chr6:18069904..18083053  
226 ALDOA A GO:0006094 Gluconeogenesis 1  
\_02 int3:chr6:18012525..18106914 chr6:18069904..18083053  
226 ALDOA A GO:0006096 Glycolysis 1  
\_02 int16:chrX:24666408..24763994 chrX:24599559..24692559  
6304 SATB1 S GO:0006325 Chromatin\_organization  
1

|        |                                            |                                                               |
|--------|--------------------------------------------|---------------------------------------------------------------|
| _02    | int3:chr6:18012525..18106914               | chr6:18030062..18033191                                       |
| 8479   | HIRIP3 H                                   | G0:0006333                                                    |
|        | Chromatin_assembly_or_disassembly          | 1                                                             |
| _02    | int9:chr8:16013494..16106285               | chr8:16077537..16083232                                       |
| 3169   | FOXA1 F                                    | G0:0006338 Chromatin_remodeling 1                             |
| _02    | int3:chr6:18012525..18106914               | chr6:18093188..18098314                                       |
| 6911   | TBX6 T                                     | G0:0006355 Regulation_of_transcription,_DNA-dependent 1.6e-05 |
| _02    | int10:chr8:63223904..63813192              | chr8:63705038..63706981                                       |
| 145258 | GSC G                                      | G0:0006355 Regulation_of_transcription,_DNA-dependent 1.6e-05 |
| _02    | int13:chr16:45965023..46373321             | chr16:46053149..46131685                                      |
| 3660   | IRF2 I                                     | G0:0006355 Regulation_of_transcription,_DNA-dependent 1.6e-05 |
| _02    | int16:chrX:24666408..24763994              | chrX:24599559..24692559                                       |
| 6304   | SATB1 S                                    | G0:0006355                                                    |
|        | Regulation_of_transcription,_DNA-dependent | 1.6e-05                                                       |
| _02    | int20:chrM:7119859..7845353                | chrM:7223951..7225043                                         |
| 652963 | BTF3P12 B                                  | G0:0006355                                                    |
|        | Regulation_of_transcription,_DNA-dependent | 1.6e-05                                                       |
| _02    | int20:chrM:7119859..7845353                | chrM:7145120..7148771                                         |
| 79369  | B3GNT4 U                                   | G0:0006486 Protein_glycosylation 1                            |
| _02    | int2:chr5:29189236..29284352               | chr5:29187858..29196161                                       |
| 4316   | MMP7 M                                     | G0:0006508 Proteolysis 0.016238                               |
| _02    | int8:chr7:22714810..22804810               | chr7:22772438..23143385                                       |
| 60676  | PAPPA2 P                                   | G0:0006508 Proteolysis 0.016238                               |
| _02    | int20:chrM:7119859..7845353                | chrM:7794400..7841032                                         |
| 51433  | ANAPC5 A                                   | G0:0006511 Ubiquitin-dependent_protein_catabolic_process 1    |
| _02    | int3:chr6:18012525..18106914               | chr6:18010887..18029186                                       |
| 9344   | TAOK2 T                                    | G0:0006612 Protein_targeting_to_membrane 1                    |
| _02    | int7:chr7:19633367..19714459               | chr7:19668098..19674935                                       |
| 5743   | PTGS2 P                                    | G0:0006633 Fatty_acid_biosynthetic_process 1                  |
| _02    | int7:chr7:19633367..19714459               | chr7:19668098..19674935                                       |
| 5743   | PTGS2 P                                    | G0:0006692 Prostanoid_metabolic_process 1                     |
| _02    | int7:chr7:19633367..19714459               | chr7:19668098..19674935                                       |
| 5743   | PTGS2 P                                    | G0:0006693 Prostaglandin_metabolic_process 1                  |
| _02    | int3:chr6:18012525..18106914               | chr6:18069904..18083053                                       |
| 226    | ALDOA A                                    | G0:0006754 ATP_biosynthetic_process 1                         |
| _02    | int7:chr7:19633367..19714459               | chr7:19668098..19674935                                       |
| 5743   | PTGS2 P                                    | G0:0006805 Xenobiotic_metabolic_process 1                     |
| _02    | int10:chr8:63223904..63813192              | chr8:63324149..63341782                                       |
| 866    | SERPINA6 S                                 | G0:0006810 Transport 1                                        |
| _02    | int11:chr10:69076487..69161721             | chr10:69056997..69142988                                      |
| 119    | ADD2 A                                     | G0:0006811 Ion_transport 0.0635899                            |
| _02    | int20:chrM:7119859..7845353                | chrM:7584448..7599633                                         |
| 84876  | ORAI1 0                                    | G0:0006811 Ion_transport 0.0635899                            |
| _02    | int3:chr6:18012525..18106914               | chr6:18010887..18029186                                       |



|                                                      |                                |            |                                      |          |
|------------------------------------------------------|--------------------------------|------------|--------------------------------------|----------|
| 9344                                                 | TAOK2 T                        | G0:0006915 | Apoptosis                            | 0.002442 |
| _02                                                  | int16:chrX:24666408..24763994  |            | chrX:24599559..24692559              |          |
| 6304                                                 | SATB1 S                        | G0:0006915 | Apoptosis                            | 0.002442 |
| _02                                                  | int20:chrM:7119859..7845353    |            | chrM:7123780..7144993                |          |
| 56616                                                | DIABLO D                       | G0:0006915 | Apoptosis                            | 0.002442 |
| _02                                                  | int20:chrM:7119859..7845353    |            | chrM:7749375..7767935                |          |
| 80196                                                | RNF34 R                        | G0:0006915 | Apoptosis                            | 0.002442 |
| _02                                                  | int20:chrM:7119859..7845353    |            | chrM:7123780..7144993                |          |
| 56616                                                | DIABLO D                       | G0:0006917 | Induction_of_apoptosis               |          |
| 1                                                    |                                |            |                                      |          |
| _02                                                  | int20:chrM:7119859..7845353    |            | chrM:7123780..7144993                |          |
| 56616                                                | DIABLO D                       | G0:0006919 | Activation_of_caspase_activity       |          |
| 1                                                    |                                |            |                                      |          |
| _02                                                  | int16:chrX:24666408..24763994  |            | chrX:24599559..24692559              |          |
| 6304                                                 | SATB1 S                        | G0:0006921 |                                      |          |
| Cellular_component_disassembly_involved_in_apoptosis |                                |            |                                      | 1        |
| _02                                                  | int7:chr7:19633367..19714459   |            | chr7:19668098..19674935              |          |
| 5743                                                 | PTGS2 P                        | G0:0006928 | Cellular_component_movement          |          |
| 1                                                    |                                |            |                                      |          |
| _02                                                  | int3:chr6:18012525..18106914   |            | chr6:18069904..18083053              |          |
| 226                                                  | ALDOA A                        | G0:0006941 | Striated_muscle_contraction          |          |
| 1                                                    |                                |            |                                      |          |
| _02                                                  | int3:chr6:18012525..18106914   |            | chr6:18010887..18029186              |          |
| 9344                                                 | TAOK2 T                        | G0:0006950 | Response_to_stress                   | 1        |
| _02                                                  | int10:chr8:63223904..63813192  |            | chr8:63386661..63400389              |          |
| 5265                                                 | SERPINA1 S                     | G0:0006953 | Acute-phase_response                 | 1        |
| _02                                                  | int10:chr8:63223904..63813192  |            | chr8:63588248..63596955              |          |
| 12                                                   | SERPINA3 S                     | G0:0006953 | Acute-phase_response                 | 1        |
| _02                                                  | int10:chr8:63223904..63813192  |            | chr8:63588248..63596955              |          |
| 12                                                   | SERPINA3 S                     | G0:0006954 | Inflammatory_response                | 1        |
| _02                                                  | int7:chr7:19633367..19714459   |            | chr7:19668098..19674935              |          |
| 5743                                                 | PTGS2 P                        | G0:0006979 | Response_to_oxidative_stress         |          |
| 1                                                    |                                |            |                                      |          |
| _02                                                  | int3:chr6:18012525..18106914   |            | chr6:18069904..18083053              |          |
| 226                                                  | ALDOA A                        | G0:0007015 | Actin_filament_organization          |          |
| 8.39999e-05                                          |                                |            |                                      |          |
| _02                                                  | int20:chrM:7119859..7845353    |            | chrM:7478035..7489428                |          |
| 54509                                                | RHOF R                         | G0:0007015 | Actin_filament_organization          |          |
| 8.39999e-05                                          |                                |            |                                      |          |
| _02                                                  | int20:chrM:7119859..7845353    |            | chrM:7794400..7841032                |          |
| 51433                                                | ANAPC5 A                       | G0:0007094 |                                      |          |
| Mitotic_cell_cycle_spindle_assembly_checkpoint       |                                |            |                                      | 1        |
| _02                                                  | int12:chr14:42191677..42265654 |            | chr14:42217642..42513368             |          |
| 1124                                                 | CHN2 C                         | G0:0007165 | Signal_transduction                  | 1        |
| _02                                                  | int0:chr4:31133158..31204643   |            | chr4:30515861..31557604              |          |
| 10718                                                | NRG3 N                         | G0:0007243 | Intracellular_protein_kinase_cascade |          |
| 1                                                    |                                |            |                                      |          |
| _02                                                  | int12:chr14:42191677..42265654 |            | chr14:42217642..42513368             |          |
| 1124                                                 | CHN2 C                         | G0:0007264 |                                      |          |
| Small_GTPase_mediated_signal_transduction            |                                |            |                                      | 0.013636 |
| _02                                                  | int20:chrM:7119859..7845353    |            | chrM:7478035..7489428                |          |
| 54509                                                | RHOF R                         | G0:0007264 |                                      |          |
| Small_GTPase_mediated_signal_transduction            |                                |            |                                      | 0.013636 |
| _02                                                  | int3:chr6:18012525..18106914   |            | chr6:18041311..18046793              |          |

8448 DOC2A D GO:0007268 Synaptic\_transmission 1  
\_02 int3:chr6:18012525..18106914 chr6:18093188..18098314  
6911 TBX6 T GO:0007275 Multicellular\_organismal\_development  
0.012557  
\_02 int10:chr8:63223904..63813192 chr8:63705038..63706981  
145258 GSC G GO:0007275 Multicellular\_organismal\_development  
0.012557  
\_02 int11:chr10:69076487..69161721 chr10:69148923..69162939  
344018 FIGLA F GO:0007275  
Multicellular\_organismal\_development 0.012557  
\_02 int10:chr8:63223904..63813192 chr8:63567114..63577016  
5104 SERPINA5 S GO:0007283 Spermatogenesis 1  
\_02 int10:chr8:63223904..63813192 chr8:63567114..63577016  
5104 SERPINA5 S GO:0007342  
Fusion\_of\_sperm\_to\_egg\_plasma\_membrane 1  
\_02 int10:chr8:63223904..63813192 chr8:63705038..63706981  
145258 GSC G GO:0007369 Gastrulation 1  
\_02 int0:chr4:31133158..31204643 chr4:30515861..31557604  
10718 NRG3 N GO:0007389 Pattern\_specification\_process 0.001235  
\_02 int9:chr8:16013494..16106285 chr8:16077537..16083232  
3169 FOXA1 F GO:0007389 Pattern\_specification\_process  
0.001235  
\_02 int3:chr6:18012525..18106914 chr6:18041311..18046793  
8448 DOC2A D GO:0007399 Nervous\_system\_development  
1  
\_02 int3:chr6:18012525..18106914 chr6:18093188..18098314  
6911 TBX6 T GO:0007498 Mesoderm\_development 1  
\_02 int7:chr7:19633367..19714459 chr7:19668098..19674935  
5743 PTGS2 P GO:0007566 Embryo\_implantation 1  
\_02 int3:chr6:18012525..18106914 chr6:18069904..18083053  
226 ALDOA A GO:0007596 Blood\_coagulation 0.00111  
\_02 int10:chr8:63223904..63813192 chr8:63386661..63400389  
5265 SERPINA1 S GO:0007596 Blood\_coagulation 0.00111  
\_02 int20:chrM:7119859..7845353 chrM:7584448..7599633  
84876 ORAI1 O GO:0007596 Blood\_coagulation 0.00111  
\_02 int7:chr7:19633367..19714459 chr7:19668098..19674935  
5743 PTGS2 P GO:0007613 Memory 1  
\_02 int8:chr7:22714810..22804810 chr7:22455294..22753932  
460 ASTN1 A GO:0007626 Locomotory\_behavior 1  
\_02 int18:chrX:48440818..48536955 chrX:48407005..48456332  
170506 DHX36 D GO:0008026 ATP-dependent\_helicase\_activity  
1  
\_02 int0:chr4:31133158..31204643 chr4:30515861..31557604  
10718 NRG3 N GO:0008083 Growth\_factor\_activity 1  
\_02 int3:chr6:18012525..18106914 chr6:18069904..18083053  
226 ALDOA A GO:0008092 Cytoskeletal\_protein\_binding  
1  
\_02 int9:chr8:16013494..16106285 chr8:16077537..16083232  
3169 FOXA1 F GO:0008134 Transcription\_factor\_binding  
0.00613999  
\_02 int11:chr10:69076487..69161721 chr10:69148923..69162939  
344018 FIGLA F GO:0008134 Transcription\_factor\_binding  
0.00613999  
\_02 int20:chrM:7119859..7845353 chrM:7625403..7746298

84678 KDM2B L GO:0008150 Biological\_process 1  
\_02 int2:chr5:29189236..29284352 chr5:29187858..29196161  
4316 MMP7 M GO:0008152 Metabolic\_process 1  
\_02 int20:chrM:7119859..7845353 chrM:7443827..7467087  
23067 SETD1B S GO:0008168 Methyltransferase\_activity  
1  
\_02 int10:chr8:63223904..63813192 chr8:63567114..63577016  
5104 SERPINA5 S GO:0008201 Heparin\_binding 1  
\_02 int7:chr7:19633367..19714459 chr7:19668098..19674935  
5743 PTGS2 P GO:0008217 Regulation\_of\_blood\_pressure  
1  
\_02 int2:chr5:29189236..29284352 chr5:29187858..29196161  
4316 MMP7 M GO:0008233 Peptidase\_activity 0.019572  
\_02 int8:chr7:22714810..22804810 chr7:22772438..23143385  
60676 PAPP2 P GO:0008233 Peptidase\_activity 0.019572  
\_02 int8:chr7:22714810..22804810 chr7:22772438..23143385  
60676 PAPP2 P GO:0008237 Metallopeptidase\_activity  
1  
\_02 int13:chr16:45965023..46373321 chr16:46053149..46131685  
3660 IRF2 I GO:0008283 Cell\_proliferation 1  
\_02 int7:chr7:19633367..19714459 chr7:19668098..19674935  
5743 PTGS2 P GO:0008285  
Negative\_regulation\_of\_cell\_proliferation 1  
\_02 int10:chr8:63223904..63813192 chr8:63202560..63300353  
57718 PPP4R4 P GO:0008287 Protein\_serine/  
threonine\_phosphatase\_complex 1  
\_02 int7:chr7:19633367..19714459 chr7:19668098..19674935  
5743 PTGS2 P GO:0008289 Lipid\_binding 1  
\_02 int11:chr10:69076487..69161721 chr10:69056997..69142988  
119 ADD2 A GO:0008290 F-actin\_capping\_protein\_complex  
1  
\_02 int9:chr8:16013494..16106285 chr8:16077537..16083232  
3169 FOXA1 F GO:0008301 DNA\_bending\_activity 1  
\_02 int3:chr6:18012525..18106914 chr6:18010887..18029186  
9344 TAOK2 T GO:0008360 Regulation\_of\_cell\_shape  
1  
\_02 int3:chr6:18012525..18106914 chr6:18069904..18083053  
226 ALDOA A GO:0008360 Regulation\_of\_cell\_shape  
1  
\_02 int20:chrM:7119859..7845353 chrM:7145120..7148771  
79369 B3GNT4 U GO:0008378 Galactosyltransferase\_activity  
1  
\_02 int5:chr7:16160915..16235033 chr7:16233741..16292928  
1660 DHX9 D GO:0008380 RNA\_splicing 1  
\_02 int20:chrM:7119859..7845353 chrM:7123780..7144993  
56616 DIABLO D GO:0008625  
Induction\_of\_apoptosis\_via\_death\_domain\_receptors 1  
\_02 int20:chrM:7119859..7845353 chrM:7123780..7144993  
56616 DIABLO D GO:0008629  
Induction\_of\_apoptosis\_by\_intracellular\_signals 1  
\_02 int20:chrM:7119859..7845353 chrM:7123780..7144993  
56616 DIABLO D GO:0008631  
Induction\_of\_apoptosis\_by\_oxidative\_stress 1  
\_02 int9:chr8:16013494..16106285 chr8:16077537..16083232

3169 FOXA1 F G0:0008634  
Negative\_regulation\_of\_survival\_gene\_product\_expression 1  
\_02 int20:chrM:7119859..7845353 chrM:7123780..7144993  
56616 DIABLO D G0:0008635  
Activation\_of\_caspase\_activity\_by\_cytochrome\_c 1  
\_02 int13:chr16:45965023..46373321 chr16:46247401..46358457  
133121 ENPP6 E G0:0008889  
Glycerophosphodiester\_phosphodiesterase\_activity 1  
\_02 int3:chr6:18012525..18106914 chr6:18093188..18098314  
6911 TBX6 T G0:0009653 Anatomical\_structure\_morphogenesis  
0.000601999  
\_02 int10:chr8:63223904..63813192 chr8:63705038..63706981  
145258 GSC G G0:0009653 Anatomical\_structure\_morphogenesis  
0.000601999  
\_02 int7:chr7:19633367..19714459 chr7:19668098..19674935  
5743 PTGS2 P G0:0009750 Response\_to\_fructose\_stimulus  
1  
\_02 int9:chr8:16013494..16106285 chr8:16077537..16083232  
3169 FOXA1 F G0:0009790 Embryo\_development 1  
\_02 int7:chr7:19633367..19714459 chr7:19668098..19674935  
5743 PTGS2 P G0:0010243 Response\_to\_organic\_nitrogen  
1  
\_02 int10:chr8:63223904..63813192 chr8:63386661..63400389  
5265 SERPINA1 S G0:0010288 Response\_to\_lead\_ion 1  
\_02 int5:chr7:16160915..16235033 chr7:16233741..16292928  
1660 DHX9 D G0:0010467 Gene\_expression 1  
\_02 int9:chr8:16013494..16106285 chr8:16077537..16083232  
3169 FOXA1 F G0:0010551 Regulation\_of\_gene-  
specific\_transcription\_from\_RNA\_polymerase\_II\_promoter 1  
\_02 int9:chr8:16013494..16106285 chr8:16077537..16083232  
3169 FOXA1 F G0:0010552 Positive\_regulation\_of\_gene-  
specific\_transcription\_from\_RNA\_polymerase\_II\_promoter 1  
\_02 int7:chr7:19633367..19714459 chr7:19668098..19674935  
5743 PTGS2 P G0:0010575  
Positive\_regulation\_vascular\_endothelial\_growth\_factor\_production  
1  
\_02 int9:chr8:16013494..16106285 chr8:16077537..16083232  
3169 FOXA1 F G0:0010843 Promoter\_binding 1  
\_02 int20:chrM:7119859..7845353 chrM:7749375..7767935  
80196 RNF34 R G0:0012505 Endomembrane\_system 1  
\_02 int7:chr7:19633367..19714459 chr7:19668098..19674935  
5743 PTGS2 P G0:0014070  
Response\_to\_organic\_cyclic\_substance 0.000727999  
\_02 int10:chr8:63223904..63813192 chr8:63386661..63400389  
5265 SERPINA1 S G0:0014070  
Response\_to\_organic\_cyclic\_substance 0.000727999  
\_02 int3:chr6:18012525..18106914 chr6:18069904..18083053  
226 ALDOA A G0:0015629 Actin\_cytoskeleton 1  
\_02 int3:chr6:18012525..18106914 chr6:18069904..18083053  
226 ALDOA A G0:0015631 Tubulin\_binding 1  
\_02 int3:chr6:18012525..18106914 chr6:18010887..18029186  
9344 TAOK2 T G0:0016023 Cytoplasmic\_membrane-  
bounded\_vesicle 1  
\_02 int13:chr16:45965023..46373321 chr16:46247401..46358457

133121 ENPP6 E G0:0016042 Lipid\_catabolic\_process  
1  
\_02 int3:chr6:18012525..18106914 chr6:18041311..18046793  
8448 DOC2A D G0:0016079 Synaptic\_vesicle\_exocytosis  
1  
\_02 int16:chrX:24666408..24763994 chrX:24599559..24692559  
6304 SATB1 S G0:0016363 Nuclear\_matrix 1  
\_02 int3:chr6:18012525..18106914 chr6:18010887..18029186  
9344 TAOK2 T G0:0016477 Cell\_migration 0.001313  
\_02 int8:chr7:22714810..22804810 chr7:22455294..22753932  
460 ASTN1 A G0:0016477 Cell\_migration 0.001313  
\_02 int20:chrM:7119859..7845353 chrM:7264614..7295832  
605 BCL7A B G0:0016481  
Negative\_regulation\_of\_transcription 1  
\_02 int7:chr7:19633367..19714459 chr7:19668098..19674935  
5743 PTGS2 P G0:0016491 Oxidoreductase\_activity  
0.011199  
\_02 int20:chrM:7119859..7845353 chrM:7625403..7746298  
84678 KDM2B L G0:0016491 Oxidoreductase\_activity  
0.011199  
\_02 int9:chr8:16013494..16106285 chr8:16077537..16083232  
3169 FOXA1 F G0:0016563  
Transcription\_activator\_activity 1  
\_02 int16:chrX:24666408..24763994 chrX:24599559..24692559  
6304 SATB1 S G0:0016564  
Transcription\_repressor\_activity 1  
\_02 int9:chr8:16013494..16106285 chr8:16077537..16083232  
3169 FOXA1 F G0:0016566  
Specific\_transcriptional\_repressor\_activity 1  
\_02 int16:chrX:24666408..24763994 chrX:24599559..24692559  
6304 SATB1 S G0:0016568 Chromatin\_modification  
0.00593299  
\_02 int20:chrM:7119859..7845353 chrM:7443827..7467087  
23067 SETD1B S G0:0016568 Chromatin\_modification  
0.00593299  
\_02 int20:chrM:7119859..7845353 chrM:7625403..7746298  
84678 KDM2B L G0:0016568 Chromatin\_modification  
0.00593299  
\_02 int16:chrX:24666408..24763994 chrX:24599559..24692559  
6304 SATB1 S G0:0016571 Histone\_methylation 1  
\_02 int16:chrX:24666408..24763994 chrX:24599559..24692559  
6304 SATB1 S G0:0016605 PML\_body 1  
\_02 int20:chrM:7119859..7845353 chrM:7443827..7467087  
23067 SETD1B S G0:0016607 Nuclear\_speck 1  
\_02 int20:chrM:7119859..7845353 chrM:7749375..7767935  
80196 RNF34 R G0:0016607 Nuclear\_speck 1  
\_02 int7:chr7:19633367..19714459 chr7:19668098..19674935  
5743 PTGS2 P G0:0016702  
Oxidoreductase\_activity,\_acting\_on\_single\_donors\_with\_incorporation\_of\_molecular\_oxygen,\_incorporation\_of\_two\_atoms\_of\_oxygen 0.000314  
\_02 int20:chrM:7119859..7845353 chrM:7625403..7746298  
84678 KDM2B L G0:0016702  
Oxidoreductase\_activity,\_acting\_on\_single\_donors\_with\_incorporation\_of\_molecular\_oxygen,\_incorporation\_of\_two\_atoms\_of\_oxygen 0.000314

|                                                    |                                |                          |                                                      |
|----------------------------------------------------|--------------------------------|--------------------------|------------------------------------------------------|
| _02                                                | int3:chr6:18012525..18106914   | chr6:18010887..18029186  |                                                      |
| 9344                                               | TAOK2 T                        | G0:0016740               | Transferase_activity 0.1261                          |
| _02                                                | int20:chrM:7119859..7845353    | chrM:7443827..7467087    |                                                      |
| 23067                                              | SETD1B S                       | G0:0016740               | Transferase_activity 0.1261                          |
| _02                                                | int20:chrM:7119859..7845353    | chrM:7145120..7148771    |                                                      |
| 79369                                              | B3GNT4 U                       | G0:0016757               |                                                      |
| Transferase_activity,_transferring_glycosyl_groups |                                |                          | 1                                                    |
| _02                                                | int3:chr6:18012525..18106914   | chr6:18085139..18092858  |                                                      |
| 5531                                               | PPP4C P                        | G0:0016787               | Hydrolase_activity 0.001131                          |
| _02                                                | int5:chr7:16160915..16235033   | chr7:16233741..16292928  |                                                      |
| 1660                                               | DHX9 D                         | G0:0016787               | Hydrolase_activity 0.001131                          |
| _02                                                | int13:chr16:45965023..46373321 | chr16:46247401..46358457 |                                                      |
| 133121                                             | ENPP6 E                        | G0:0016787               | Hydrolase_activity 0.001131                          |
| _02                                                | int18:chrX:48440818..48536955  | chrX:48407005..48456332  |                                                      |
| 170506                                             | DHX36 D                        | G0:0016787               | Hydrolase_activity 0.001131                          |
| _02                                                | int3:chr6:18012525..18106914   | chr6:18069904..18083053  |                                                      |
| 226                                                | ALDOA A                        | G0:0016829               | Lyase_activity 0.000477                              |
| _02                                                | int5:chr7:16160915..16235033   | chr7:16190066..16223809  |                                                      |
| 80896                                              | NPL N                          | G0:0016829               | Lyase_activity 0.000477                              |
| _02                                                | int20:chrM:7119859..7845353    | chrM:7749375..7767935    |                                                      |
| 80196                                              | RNF34 R                        | G0:0016874               | Ligase_activity 1                                    |
| _02                                                | int3:chr6:18012525..18106914   | chr6:18041311..18046793  |                                                      |
| 8448                                               | DOC2A D                        | G0:0017158               | Regulation_of_calcium_ion-<br>dependent_exocytosis 1 |
| _02                                                | int10:chr8:63223904..63813192  | chr8:63588248..63596955  |                                                      |
| 12                                                 | SERPINA3 S                     | G0:0019216               |                                                      |
| Regulation_of_lipid_metabolic_process              |                                |                          | 1                                                    |
| _02                                                | int3:chr6:18012525..18106914   | chr6:18041311..18046793  |                                                      |
| 8448                                               | DOC2A D                        | G0:0019717               | Synaptosome 1                                        |
| _02                                                | int20:chrM:7119859..7845353    | chrM:7625403..7746298    |                                                      |
| 84678                                              | KDM2B L                        | G0:0019843               | RRNA_binding 1                                       |
| _02                                                | int7:chr7:19633367..19714459   | chr7:19668098..19674935  |                                                      |
| 5743                                               | PTGS2 P                        | G0:0019899               | Enzyme_binding 1                                     |
| _02                                                | int9:chr8:16013494..16106285   | chr8:16077537..16083232  |                                                      |
| 3169                                               | FOXA1 F                        | G0:0019904               | Protein_domain_specific_binding<br>1                 |
| _02                                                | int7:chr7:19633367..19714459   | chr7:19668098..19674935  |                                                      |
| 5743                                               | PTGS2 P                        | G0:0020037               | Heme_binding 1                                       |
| _02                                                | int10:chr8:63223904..63813192  | chr8:63705038..63706981  |                                                      |
| 145258                                             | GSC G                          | G0:0021904               | Dorsal/ventral_neural_tube_patterning<br>1           |
| _02                                                | int3:chr6:18012525..18106914   | chr6:18010887..18029186  |                                                      |
| 9344                                               | TAOK2 T                        | G0:0030036               | Actin_cytoskeleton_organization<br>0.00546999        |
| _02                                                | int11:chr10:69076487..69161721 | chr10:69056997..69142988 |                                                      |
| 119                                                | ADD2 A                         | G0:0030036               | Actin_cytoskeleton_organization<br>0.00546999        |
| _02                                                | int3:chr6:18012525..18106914   | chr6:18041311..18046793  |                                                      |
| 8448                                               | DOC2A D                        | G0:0030054               | Cell_junction 0.0549819                              |
| _02                                                | int19:chrY:41275569..41346277  | chrY:41314209..41321352  |                                                      |
| 140689                                             | CBLN4 C                        | G0:0030054               | Cell_junction 0.0549819                              |
| _02                                                | int1:chr5:6499318..8170565     | chr5:7583475..8124265    |                                                      |
| 84623                                              | KIRREL3 K                      | G0:0030097               | Hemopoiesis 0.000805999                              |
| _02                                                | int11:chr10:69076487..69161721 | chr10:69056997..69142988 |                                                      |

|                                                       |                                |                                             |             |
|-------------------------------------------------------|--------------------------------|---------------------------------------------|-------------|
| 119                                                   | ADD2 A                         | G0:0030097 Hemopoiesis                      | 0.000805999 |
| _02                                                   | int8:chr7:22714810..22804810   | chr7:22772438..23143385                     |             |
| 60676                                                 | PAPPA2 P                       | G0:0030154 Cell_differentiation             | 0.030068    |
| _02                                                   | int11:chr10:69076487..69161721 | chr10:69148923..69162939                    |             |
| 344018                                                | FIGLA F                        | G0:0030154 Cell_differentiation             | 0.030068    |
| _02                                                   | int3:chr6:18012525..18106914   | chr6:18069904..18083053                     |             |
| 226                                                   | ALDOA A                        | G0:0030168 Platelet_activation              |             |
| 0.000547999                                           |                                |                                             |             |
| _02                                                   | int10:chr8:63223904..63813192  | chr8:63386661..63400389                     |             |
| 5265                                                  | SERPINA1 S                     | G0:0030168 Platelet_activation              |             |
| 0.000547999                                           |                                |                                             |             |
| _02                                                   | int20:chrM:7119859..7845353    | chrM:7584448..7599633                       |             |
| 84876                                                 | ORAI1 O                        | G0:0030168 Platelet_activation              |             |
| 0.000547999                                           |                                |                                             |             |
| _02                                                   | int10:chr8:63223904..63813192  | chr8:63705038..63706981                     |             |
| 145258                                                | GSC G                          | G0:0030178                                  |             |
| Negative_regulation_of_Wnt_receptor_signaling_pathway |                                |                                             | 1           |
| _02                                                   | int7:chr7:19633367..19714459   | chr7:19668098..19674935                     |             |
| 5743                                                  | PTGS2 P                        | G0:0030282 Bone_mineralization              | 1           |
| _02                                                   | int9:chr8:16013494..16106285   | chr8:16077537..16083232                     |             |
| 3169                                                  | FOXA1 F                        | G0:0030324 Lung_development                 | 1           |
| _02                                                   | int10:chr8:63223904..63813192  | chr8:63379422..63381819                     |             |
| 390502                                                | SERPINA2 S                     | G0:0030414 Peptidase_inhibitor_activity     |             |
| 1                                                     |                                |                                             |             |
| _02                                                   | int10:chr8:63223904..63813192  | chr8:63386661..63400389                     |             |
| 5265                                                  | SERPINA1 S                     | G0:0030414 Peptidase_inhibitor_activity     |             |
| 1                                                     |                                |                                             |             |
| _02                                                   | int10:chr8:63223904..63813192  | chr8:63436708..63453265                     |             |
| 256394                                                | SERPINA11 S                    | G0:0030414 Peptidase_inhibitor_activity     |             |
| 1                                                     |                                |                                             |             |
| _02                                                   | int10:chr8:63223904..63813192  | chr8:63473300..63488592                     |             |
| 327657                                                | SERPINA9 S                     | G0:0030414 Peptidase_inhibitor_activity     |             |
| 1                                                     |                                |                                             |             |
| _02                                                   | int10:chr8:63223904..63813192  | chr8:63497827..63521295                     |             |
| 145264                                                | SERPINA12 S                    | G0:0030414 Peptidase_inhibitor_activity     |             |
| 1                                                     |                                |                                             |             |
| _02                                                   | int10:chr8:63223904..63813192  | chr8:63552073..63560608                     |             |
| 5267                                                  | SERPINA4 S                     | G0:0030414 Peptidase_inhibitor_activity     |             |
| 1                                                     |                                |                                             |             |
| _02                                                   | int10:chr8:63223904..63813192  | chr8:63567114..63577016                     |             |
| 5104                                                  | SERPINA5 S                     | G0:0030414 Peptidase_inhibitor_activity     |             |
| 1                                                     |                                |                                             |             |
| _02                                                   | int10:chr8:63223904..63813192  | chr8:63588248..63596955                     |             |
| 12                                                    | SERPINA3 S                     | G0:0030414 Peptidase_inhibitor_activity     |             |
| 1                                                     |                                |                                             |             |
| _02                                                   | int11:chr10:69076487..69161721 | chr10:69056997..69142988                    |             |
| 119                                                   | ADD2 A                         | G0:0030507 Spectrin_binding                 | 1           |
| _02                                                   | int10:chr8:63223904..63813192  | chr8:63705038..63706981                     |             |
| 145258                                                | GSC G                          | G0:0030528 Transcription_regulator_activity |             |
| 0.004723                                              |                                |                                             |             |
| _02                                                   | int11:chr10:69076487..69161721 | chr10:69148923..69162939                    |             |
| 344018                                                | FIGLA F                        | G0:0030528                                  |             |
| Transcription_regulator_activity                      |                                |                                             | 0.004723    |
| _02                                                   | int5:chr7:16160915..16235033   | chr7:16233741..16292928                     |             |

|             |            |                                |                                                                                                |   |
|-------------|------------|--------------------------------|------------------------------------------------------------------------------------------------|---|
| 1660        | DHX9 D     | G0:0030529                     | Ribonucleoprotein_complex                                                                      | 1 |
| _02         |            | int2:chr5:29189236..29284352   | chr5:29187858..29196161                                                                        |   |
| 4316        | MMP7 M     | G0:0030574                     | Collagen_catabolic_process                                                                     | 1 |
| _02         |            | int3:chr6:18012525..18106914   | chr6:18010887..18029186                                                                        |   |
| 9344        | TAOK2 T    | G0:0030659                     | Cytoplasmic_vesicle_membrane                                                                   |   |
| 1           |            |                                |                                                                                                |   |
| _02         |            | int3:chr6:18012525..18106914   | chr6:18041311..18046793                                                                        |   |
| 8448        | DOC2A D    | G0:0030672                     | Synaptic_vesicle_membrane                                                                      |   |
| 1           |            |                                |                                                                                                |   |
| _02         |            | int7:chr7:19633367..19714459   | chr7:19668098..19674935                                                                        |   |
| 5743        | PTGS2 P    | G0:0030728                     | Ovulation                                                                                      | 1 |
| _02         |            | int0:chr4:31133158..31204643   | chr4:30515861..31557604                                                                        |   |
| 10718       | NRG3 N     | G0:0030879                     | Mammary_gland_development                                                                      | 1 |
| _02         |            | int10:chr8:63223904..63813192  | chr8:63705038..63706981                                                                        |   |
| 145258      | GSC G      | G0:0030900                     | Forebrain_development                                                                          | 1 |
| _02         |            | int0:chr4:31133158..31204643   | chr4:30515861..31557604                                                                        |   |
| 10718       | NRG3 N     | G0:0030971                     | Receptor_tyrosine_kinase_binding                                                               |   |
| 1           |            |                                |                                                                                                |   |
| _02         |            | int3:chr6:18012525..18106914   | chr6:18069904..18083053                                                                        |   |
| 226         | ALDOA A    | G0:0031093                     | Platelet_alpha_granule_lumen                                                                   |   |
| 8.49999e-05 |            |                                |                                                                                                |   |
| _02         |            | int10:chr8:63223904..63813192  | chr8:63386661..63400389                                                                        |   |
| 5265        | SERPINA1 S | G0:0031093                     | Platelet_alpha_granule_lumen                                                                   |   |
| 8.49999e-05 |            |                                |                                                                                                |   |
| _02         |            | int20:chrM:7119859..7845353    | chrM:7794400..7841032                                                                          |   |
| 51433       | ANAPC5 A   | G0:0031145                     | Anaphase-promoting_complex-dependent_proteasomal_ubiquitin-dependent_protein_catabolic_process |   |
| 1           |            |                                |                                                                                                |   |
| _02         |            | int3:chr6:18012525..18106914   | chr6:18041311..18046793                                                                        |   |
| 8448        | DOC2A D    | G0:0031410                     | Cytoplasmic_vesicle                                                                            | 1 |
| _02         |            | int7:chr7:19633367..19714459   | chr7:19668098..19674935                                                                        |   |
| 5743        | PTGS2 P    | G0:0031622                     | Positive_regulation_of_fever                                                                   |   |
| 1           |            |                                |                                                                                                |   |
| _02         |            | int3:chr6:18012525..18106914   | chr6:18069904..18083053                                                                        |   |
| 226         | ALDOA A    | G0:0031674                     | I_band                                                                                         | 1 |
| _02         |            | int11:chr10:69076487..69161721 | chr10:69056997..69142988                                                                       |   |
| 119         | ADD2 A     | G0:0032092                     | Positive_regulation_of_protein_binding                                                         |   |
| 1           |            |                                |                                                                                                |   |
| _02         |            | int7:chr7:19633367..19714459   | chr7:19668098..19674935                                                                        |   |
| 5743        | PTGS2 P    | G0:0032355                     | Response_to_estradiol_stimulus                                                                 |   |
| 3e-06       |            |                                |                                                                                                |   |
| _02         |            | int9:chr8:16013494..16106285   | chr8:16077537..16083232                                                                        |   |
| 3169        | FOXA1 F    | G0:0032355                     | Response_to_estradiol_stimulus                                                                 |   |
| 3e-06       |            |                                |                                                                                                |   |
| _02         |            | int10:chr8:63223904..63813192  | chr8:63386661..63400389                                                                        |   |
| 5265        | SERPINA1 S | G0:0032355                     | Response_to_estradiol_stimulus                                                                 |   |
| 3e-06       |            |                                |                                                                                                |   |
| _02         |            | int7:chr7:19633367..19714459   | chr7:19668098..19674935                                                                        |   |
| 5743        | PTGS2 P    | G0:0032496                     | Response_to_lipopolysaccharide                                                                 |   |
| 0.000601999 |            |                                |                                                                                                |   |
| _02         |            | int10:chr8:63223904..63813192  | chr8:63386661..63400389                                                                        |   |
| 5265        | SERPINA1 S | G0:0032496                     | Response_to_lipopolysaccharide                                                                 |   |
| 0.000601999 |            |                                |                                                                                                |   |
| _02         |            | int7:chr7:19633367..19714459   | chr7:19668098..19674935                                                                        |   |



5743 PTGS2 P GO:0033280 Response\_to\_vitamin\_D 1  
\_02 int7:chr7:19633367..19714459 chr7:19668098..19674935  
5743 PTGS2 P GO:0034097 Response\_to\_cytokine\_stimulus  
0.000151  
\_02 int10:chr8:63223904..63813192 chr8:63386661..63400389  
5265 SERPINA1 S GO:0034097 Response\_to\_cytokine\_stimulus  
0.000151  
\_02 int5:chr7:16160915..16235033 chr7:16233741..16292928  
1660 DHX9 D GO:0034605 Cellular\_response\_to\_heat 1  
\_02 int20:chrM:7119859..7845353 chrM:7443827..7467087  
23067 SETD1B S GO:0035097  
Histone\_methyltransferase\_complex 1  
\_02 int16:chrX:24666408..24763994 chrX:24599559..24692559  
6304 SATB1 S GO:0042110 T\_cell\_activation 1  
\_02 int2:chr5:29189236..29284352 chr5:29187858..29196161  
4316 MMP7 M GO:0042127 Regulation\_of\_cell\_proliferation  
1  
\_02 int9:chr8:16013494..16106285 chr8:16077537..16083232  
3169 FOXA1 F GO:0042445 Hormone\_metabolic\_process  
1  
\_02 int7:chr7:19633367..19714459 chr7:19668098..19674935  
5743 PTGS2 P GO:0042446 Hormone\_biosynthetic\_process  
1  
\_02 int10:chr8:63223904..63813192 chr8:63705038..63706981  
145258 GSC G GO:0042474 Middle\_ear\_morphogenesis 1  
\_02 int7:chr7:19633367..19714459 chr7:19668098..19674935  
5743 PTGS2 P GO:0042493 Response\_to\_drug 1  
\_02 int9:chr8:16013494..16106285 chr8:16077537..16083232  
3169 FOXA1 F GO:0042593 Glucose\_homeostasis 1  
\_02 int7:chr7:19633367..19714459 chr7:19668098..19674935  
5743 PTGS2 P GO:0042640 Anagen 1  
\_02 int20:chrM:7119859..7845353 chrM:7443827..7467087  
23067 SETD1B S GO:0042800  
Histone\_methyltransferase\_activity\_(H3-K4\_specific) 1  
\_02 int3:chr6:18012525..18106914 chr6:18069904..18083053  
226 ALDOA A GO:0042802 Identical\_protein\_binding  
1  
\_02 int11:chr10:69076487..69161721 chr10:69056997..69142988  
119 ADD2 A GO:0042803 Protein\_homodimerization\_activity  
1  
\_02 int7:chr7:19633367..19714459 chr7:19668098..19674935  
5743 PTGS2 P GO:0043065  
Positive\_regulation\_of\_apoptosis 1  
\_02 int7:chr7:19633367..19714459 chr7:19668098..19674935  
5743 PTGS2 P GO:0043234 Protein\_complex 0.00452  
\_02 int10:chr8:63223904..63813192 chr8:63567114..63577016  
5104 SERPINA5 S GO:0043234 Protein\_complex 0.00452  
\_02 int10:chr8:63223904..63813192 chr8:63705038..63706981  
145258 GSC G GO:0043565 Sequence-specific\_DNA\_binding 0.001001  
\_02 int11:chr10:69076487..69161721 chr10:69148923..69162939  
344018 FIGLA F GO:0043565 Sequence-specific\_DNA\_binding  
0.001001  
\_02 int16:chrX:24666408..24763994 chrX:24599559..24692559  
6304 SATB1 S GO:0043565 Sequence-specific\_DNA\_binding

0.001001  
\_02 int10:chr8:63223904..63813192 chr8:63705038..63706981  
145258 GSC G GO:0043583 Ear\_development 1  
\_02 int16:chrX:24666408..24763994 chrX:24599559..24692559  
6304 SATB1 S GO:0044419  
Interspecies\_interaction\_between\_organisms 1  
\_02 int3:chr6:18012525..18106914 chr6:18041311..18046793  
8448 DOC2A D GO:0045202 Synapse 0.037092  
\_02 int19:chrY:41275569..41346277 chrY:41314209..41321352  
140689 CBLN4 C GO:0045202 Synapse 0.037092  
\_02 int7:chr7:19633367..19714459 chr7:19668098..19674935  
5743 PTGS2 P GO:0045429  
Positive\_regulation\_of\_nitric\_oxide\_biosynthetic\_process 1  
\_02 int13:chr16:45965023..46373321 chr16:46053149..46131685  
3660 IRF2 I GO:0045449 Regulation\_of\_transcription  
0.0647219  
\_02 int20:chrM:7119859..7845353 chrM:7443827..7467087  
23067 SETD1B S GO:0045449 Regulation\_of\_transcription  
0.0647219  
\_02 int20:chrM:7119859..7845353 chrM:7625403..7746298  
84678 KDM2B L GO:0045449 Regulation\_of\_transcription  
0.0647219  
\_02 int9:chr8:16013494..16106285 chr8:16077537..16083232  
3169 FOXA1 F GO:0045666  
Positive\_regulation\_of\_neuron\_differentiation 1  
\_02 int10:chr8:63223904..63813192 chr8:63567114..63577016  
5104 SERPINA5 S GO:0045861  
Negative\_regulation\_of\_proteolysis 1  
\_02 int7:chr7:19633367..19714459 chr7:19668098..19674935  
5743 PTGS2 P GO:0045907  
Positive\_regulation\_of\_vasoconstriction 1  
\_02 int9:chr8:16013494..16106285 chr8:16077537..16083232  
3169 FOXA1 F GO:0045931  
Positive\_regulation\_of\_mitotic\_cell\_cycle 1  
\_02 int9:chr8:16013494..16106285 chr8:16077537..16083232  
3169 FOXA1 F GO:0045944  
Positive\_regulation\_of\_transcription\_from\_RNA\_polymerase\_II\_promoter  
1  
\_02 int7:chr7:19633367..19714459 chr7:19668098..19674935  
5743 PTGS2 P GO:0045987  
Positive\_regulation\_of\_smooth\_muscle\_contraction 1  
\_02 int3:chr6:18012525..18106914 chr6:18010887..18029186  
9344 TAOK2 T GO:0046330  
Positive\_regulation\_of\_JNK\_cascade 1  
\_02 int7:chr7:19633367..19714459 chr7:19668098..19674935  
5743 PTGS2 P GO:0046697 Decidualization 1  
\_02 int3:chr6:18012525..18106914 chr6:18069904..18083053  
226 ALDOA A GO:0046716 Muscle\_cell\_homeostasis  
1  
\_02 int11:chr10:69076487..69161721 chr10:69056997..69142988  
119 ADD2 A GO:0046982 Protein\_heterodimerization\_activity  
1  
\_02 int3:chr6:18012525..18106914 chr6:18010887..18029186  
9344 TAOK2 T GO:0048041 Focal\_adhesion\_assembly

1

\_02 int20:chrM:7119859..7845353 chrM:7443827..7467087  
23067 SETD1B S GO:0048188 Set1C/COMPASS\_complex 1

\_02 int11:chr10:69076487..69161721 chr10:69148923..69162939  
344018 FIGLA F GO:0048477 Oogenesis 1

\_02 int11:chr10:69076487..69161721 chr10:69148923..69162939  
344018 FIGLA F GO:0048599 Oocyte\_development 1

\_02 int10:chr8:63223904..63813192 chr8:63705038..63706981  
145258 GSC G GO:0048644 Muscle\_organ\_morphogenesis 1

\_02 int7:chr7:19633367..19714459 chr7:19668098..19674935  
5743 PTGS2 P GO:0048661

Positive\_regulation\_of\_smooth\_muscle\_cell\_proliferation 1

\_02 int9:chr8:16013494..16106285 chr8:16077537..16083232  
3169 FOXA1 F GO:0048665 Neuron\_fate\_specification

1

\_02 int10:chr8:63223904..63813192 chr8:63705038..63706981  
145258 GSC G GO:0048704 Embryonic\_skeletal\_system\_morphogenesis 1

\_02 int9:chr8:16013494..16106285 chr8:16077537..16083232  
3169 FOXA1 F GO:0048754

Branching\_morphogenesis\_of\_a\_tube 1

\_02 int7:chr7:19633367..19714459 chr7:19668098..19674935  
5743 PTGS2 P GO:0050727

Regulation\_of\_inflammatory\_response 1

\_02 int11:chr10:69076487..69161721 chr10:69056997..69142988  
119 ADD2 A GO:0051015 Actin\_filament\_binding 1

\_02 int11:chr10:69076487..69161721 chr10:69056997..69142988  
119 ADD2 A GO:0051017 Actin\_filament\_bundle\_assembly 1

\_02 int12:chr14:42191677..42265654 chr14:42217642..42513368  
1124 CHN2 C GO:0051056

Regulation\_of\_small\_GTPase\_mediated\_signal\_transduction  
0.00927499

\_02 int20:chrM:7119859..7845353 chrM:7478035..7489428  
54509 RHOF R GO:0051056

Regulation\_of\_small\_GTPase\_mediated\_signal\_transduction  
0.00927499

\_02 int9:chr8:16013494..16106285 chr8:16077537..16083232  
3169 FOXA1 F GO:0051090

Regulation\_of\_transcription\_factor\_activity 1

\_02 int9:chr8:16013494..16106285 chr8:16077537..16083232  
3169 FOXA1 F GO:0051091

Positive\_regulation\_of\_transcription\_factor\_activity 1

\_02 int20:chrM:7119859..7845353 chrM:7794400..7841032  
51433 ANAPC5 A GO:0051301 Cell\_division 1

\_02 int7:chr7:19633367..19714459 chr7:19668098..19674935  
5743 PTGS2 P GO:0051384

Response\_to\_glucocorticoid\_stimulus 1

\_02 int20:chrM:7119859..7845353 chrM:7794400..7841032  
51433 ANAPC5 A GO:0051436

Negative\_regulation\_of\_ubiquitin-  
protein\_ligase\_activity\_involved\_in\_mitotic\_cell\_cycle 1

\_02 int20:chrM:7119859..7845353 chrM:7794400..7841032  
51433 ANAPC5 A GO:0051437

Positive\_regulation\_of\_ubiquitin-

protein\_ligase\_activity\_involved\_in\_mitotic\_cell\_cycle 1  
 \_02 int20:chrM:7119859..7845353 chrM:7794400..7841032  
 51433 ANAPC5 A GO:0051439 Regulation\_of\_ubiquitin-  
 protein\_ligase\_activity\_involved\_in\_mitotic\_cell\_cycle 1  
 \_02 int20:chrM:7119859..7845353 chrM:7443827..7467087  
 23067 SETD1B S GO:0051568 Histone\_H3-K4\_methylation  
 1  
 \_02 int7:chr7:19633367..19714459 chr7:19668098..19674935  
 5743 PTGS2 P GO:0051726 Regulation\_of\_cell\_cycle  
 1  
 \_02 int20:chrM:7119859..7845353 chrM:7625403..7746298  
 84678 KDM2B L GO:0051864  
 Histone\_demethylase\_activity\_(H3-K36\_specific) 1  
 \_02 int20:chrM:7119859..7845353 chrM:7584448..7599633  
 84876 ORAI1 O GO:0051924  
 Regulation\_of\_calcium\_ion\_transport 1  
 \_02 int20:chrM:7119859..7845353 chrM:7584448..7599633  
 84876 ORAI1 O GO:0051928  
 Positive\_regulation\_of\_calcium\_ion\_transport 1  
 \_02 int7:chr7:19633367..19714459 chr7:19668098..19674935  
 5743 PTGS2 P GO:0051968  
 Positive\_regulation\_of\_synaptic\_transmission,\_glutamatergic  
 1  
 \_02 int7:chr7:19633367..19714459 chr7:19668098..19674935  
 5743 PTGS2 P GO:0055114 Oxidation-reduction\_process  
 0.01498  
 \_02 int20:chrM:7119859..7845353 chrM:7625403..7746298  
 84678 KDM2B L GO:0055114 Oxidation-reduction\_process  
 0.01498  
 \_02 int9:chr8:16013494..16106285 chr8:16077537..16083232  
 3169 FOXA1 F GO:0060441  
 Epithelial\_tube\_branching\_involved\_in\_lung\_morphogenesis 1  
 \_02 int9:chr8:16013494..16106285 chr8:16077537..16083232  
 3169 FOXA1 F GO:0060740  
 Prostate\_gland\_epithelium\_morphogenesis 1  
 \_02 int5:chr7:16160915..16235033 chr7:16233741..16292928  
 1660 DHX9 D GO:0070934 CRD-mediated\_mRNA\_stabilization  
 1  
 \_02 int5:chr7:16160915..16235033 chr7:16233741..16292928  
 1660 DHX9 D GO:0070937 CRD-mediated\_mRNA\_stability\_complex  
 1  
 \_02 int20:chrM:7119859..7845353 chrM:7794400..7841032  
 51433 ANAPC5 A GO:0070979 Protein\_K11-  
 linked\_ubiquitination 1

---

### III. Interval Summary

---

| _03   | INTERVAL                     | N_SNP | N_ALTLOC | N_GENE | GENE_ID | GENE_DESC |
|-------|------------------------------|-------|----------|--------|---------|-----------|
| _03   | int0:chr4:31133158..31204643 |       |          |        | 0       | 0 1       |
| 10718 | NRG3                         | n     |          |        |         |           |
| _03   | int1:chr5:6499318..8170565   |       |          |        | 0       | 0 2       |

|                 |                               |   |   |    |
|-----------------|-------------------------------|---|---|----|
| 84623,100422918 | KIRREL3,MIR3167 k ; m ;       |   |   |    |
| _03             | int1:chr5:6499318..8170565    | 0 | 0 | 2  |
| 399972,28960    | FLJ39051,DCPS h ; d ;         |   |   |    |
| _03             | int2:chr5:29189236..29284352  | 0 | 0 | 1  |
| 4316            | MMP7 m                        |   |   |    |
| _03             | int3:chr6:18012525..18106914  | 0 | 0 | 8  |
| 9344            | TAOK2 T                       |   |   |    |
| _03             | int3:chr6:18012525..18106914  | 0 | 0 | 8  |
| 8479            | HIRIP3 H                      |   |   |    |
| _03             | int3:chr6:18012525..18106914  | 0 | 0 | 8  |
| 283899,8448     | IN080E,DOC2A I ; d ;          |   |   |    |
| _03             | int3:chr6:18012525..18106914  | 0 | 0 | 8  |
| 146378,83723    | C16orf92,FAM57B c ; f ;       |   |   |    |
| _03             | int3:chr6:18012525..18106914  | 0 | 0 | 8  |
| 226             | ALDOA a                       |   |   |    |
| _03             | int3:chr6:18012525..18106914  | 0 | 0 | 8  |
| 5531            | PPP4C p                       |   |   |    |
| _03             | int3:chr6:18012525..18106914  | 0 | 0 | 8  |
| 6911            | TBX6 T                        |   |   |    |
| _03             | int3:chr6:18012525..18106914  | 0 | 0 | 8  |
| 83719           | YPEL3 y                       |   |   |    |
| _03             | int5:chr7:16160915..16235033  | 0 | 0 | 2  |
| 80896           | NPL N                         |   |   |    |
| _03             | int5:chr7:16160915..16235033  | 0 | 0 | 2  |
| 1660            | DHX9 D                        |   |   |    |
| _03             | int6:chr7:17747493..17832876  | 0 | 0 | 1  |
| 81563           | C1orf21 c                     |   |   |    |
| _03             | int7:chr7:19633367..19714459  | 0 | 0 | 1  |
| 5743            | PTGS2 p                       |   |   |    |
| _03             | int8:chr7:22714810..22804810  | 0 | 0 | 2  |
| 460,574441      | ASTN1,MIR488 a ; m ;          |   |   |    |
| _03             | int8:chr7:22714810..22804810  | 0 | 0 | 2  |
| 60676           | PAPPA2 p                      |   |   |    |
| _03             | int9:chr8:16013494..16106285  | 0 | 0 | 2  |
| 145282          | MIPOL1 m                      |   |   |    |
| _03             | int9:chr8:16013494..16106285  | 0 | 0 | 2  |
| 3169            | FOXA1 f                       |   |   |    |
| _03             | int10:chr8:63223904..63813192 | 0 | 0 | 11 |
| 57718           | PPP4R4 p                      |   |   |    |
| _03             | int10:chr8:63223904..63813192 | 0 | 0 | 11 |
| 866             | SERPINA6 s                    |   |   |    |
| _03             | int10:chr8:63223904..63813192 | 0 | 0 | 11 |
| 390502          | SERPINA2 s                    |   |   |    |
| _03             | int10:chr8:63223904..63813192 | 0 | 0 | 11 |
| 5265            | SERPINA1 s                    |   |   |    |
| _03             | int10:chr8:63223904..63813192 | 0 | 0 | 11 |
| 256394          | SERPINA11 s                   |   |   |    |
| _03             | int10:chr8:63223904..63813192 | 0 | 0 | 11 |
| 327657          | SERPINA9 s                    |   |   |    |
| _03             | int10:chr8:63223904..63813192 | 0 | 0 | 11 |
| 145264          | SERPINA12 s                   |   |   |    |
| _03             | int10:chr8:63223904..63813192 | 0 | 0 | 11 |
| 5267            | SERPINA4 s                    |   |   |    |
| _03             | int10:chr8:63223904..63813192 | 0 | 0 | 11 |

|        |                                |   |   |   |    |
|--------|--------------------------------|---|---|---|----|
| 5104   | SERPINA5                       | s |   |   |    |
| _03    | int10:chr8:63223904..63813192  |   | 0 | 0 | 11 |
| 12     | SERPINA3                       | s |   |   |    |
| _03    | int10:chr8:63223904..63813192  |   | 0 | 0 | 11 |
| 145258 | GSC                            | g |   |   |    |
| _03    | int11:chr10:69076487..69161721 |   | 0 | 0 | 2  |
| 119    | ADD2                           | a |   |   |    |
| _03    | int11:chr10:69076487..69161721 |   | 0 | 0 | 2  |
| 344018 | FIGLA                          | f |   |   |    |
| _03    | int12:chr14:42191677..42265654 |   | 0 | 0 | 1  |
| 1124   | CHN2                           | c |   |   |    |
| _03    | int13:chr16:45965023..46373321 |   | 0 | 0 | 2  |
| 3660   | IRF2                           | i |   |   |    |
| _03    | int13:chr16:45965023..46373321 |   | 0 | 0 | 2  |
| 133121 | ENPP6                          | e |   |   |    |
| _03    | int14:chr21:45925954..46020103 |   | 0 | 0 | 1  |
| 338645 | LUZP2                          | l |   |   |    |
| _03    | int16:chrX:24666408..24763994  |   | 0 | 0 | 1  |
| 6304   | SATB1                          | S |   |   |    |
| _03    | int18:chrX:48440818..48536955  |   | 0 | 0 | 2  |
| 170506 | DHX36                          | D |   |   |    |
| _03    | int18:chrX:48440818..48536955  |   | 0 | 0 | 2  |
| 344758 | GPR149                         | G |   |   |    |
| _03    | int19:chrY:41275569..41346277  |   | 0 | 0 | 1  |
| 140689 | CBLN4                          | c |   |   |    |
| _03    | int20:chrM:7119859..7845353    |   | 0 | 0 | 13 |
| 56616  | DIABLO                         | d |   |   |    |
| _03    | int20:chrM:7119859..7845353    |   | 0 | 0 | 13 |
| 79369  | B3GNT4                         | U |   |   |    |
| _03    | int20:chrM:7119859..7845353    |   | 0 | 0 | 13 |
| 386653 | IL31                           | i |   |   |    |
| _03    | int20:chrM:7119859..7845353    |   | 0 | 0 | 13 |
| 652963 | BTF3P12                        | b |   |   |    |
| _03    | int20:chrM:7119859..7845353    |   | 0 | 0 | 13 |
| 605    | BCL7A                          | B |   |   |    |
| _03    | int20:chrM:7119859..7845353    |   | 0 | 0 | 13 |
| 144406 | WDR66                          | W |   |   |    |
| _03    | int20:chrM:7119859..7845353    |   | 0 | 0 | 13 |
| 23067  | SETD1B                         | S |   |   |    |
| _03    | int20:chrM:7119859..7845353    |   | 0 | 0 | 13 |
| 338799 | LOC338799                      | h |   |   |    |
| _03    | int20:chrM:7119859..7845353    |   | 0 | 0 | 13 |
| 54509  | RHOF                           | r |   |   |    |
| _03    | int20:chrM:7119859..7845353    |   | 0 | 0 | 13 |
| 84876  | ORAI1                          | O |   |   |    |
| _03    | int20:chrM:7119859..7845353    |   | 0 | 0 | 13 |
| 84678  | KDM2B                          | l |   |   |    |
| _03    | int20:chrM:7119859..7845353    |   | 0 | 0 | 13 |
| 80196  | RNF34                          | r |   |   |    |
| _03    | int20:chrM:7119859..7845353    |   | 0 | 0 | 13 |
| 51433  | ANAPC5                         | a |   |   |    |
