# Supplementary material for: Genome-Wide Analyses Suggest Mechanisms Involving Early B-Cell Development in Canine IgA Deficiency
Source: PubMed Central journal article supplement (PMC4520476; doi:10.1371/journal.pone.0133844), 2015-07-30
Supplement: pone.0133844.s023.pdf [file pone.0133844.s023.pdf]

**Table S13. Descriptive statistics of IgA levels in four dog breeds**

| <b>Breed</b> | <b>Number of ind.</b> | <b>IgA min</b> | <b>25% percentile</b> | <b>Median IgA</b> | <b>75% percentile</b> | <b>IgA max</b> | <b>Mean IgA (SD)</b> | <b>Lower 95% CI of the geometric mean</b> |
|--------------|-----------------------|----------------|-----------------------|-------------------|-----------------------|----------------|----------------------|-------------------------------------------|
| <b>GSD</b>   | 516                   | 0.02           | 0.13                  | 0.21              | 0.32                  | 1.35           | 0.26 (0.19)          | 0.19                                      |
| <b>GR</b>    | 162                   | 0.03           | 0.1                   | 0.18              | 0.33                  | 1.12           | 0.26 (0.21)          | 0.16                                      |
| <b>LR</b>    | 139                   | 0.03           | 0.1                   | 0.19              | 0.32                  | 1.22           | 0.28 (0.23)          | 0.16                                      |
| <b>SP</b>    | 96                    | 0.01           | 0.04                  | 0.07              | 0.14                  | 0.56           | 0.10 (0.10)          | 0.06                                      |
