# Supplementary material for: Genome-Wide Analyses Suggest Mechanisms Involving Early B-Cell Development in Canine IgA Deficiency
Source: PubMed Central journal article supplement (PMC4520476; doi:10.1371/journal.pone.0133844), 2015-07-30
Supplement: pone.0133844.s024.pdf [file pone.0133844.s024.pdf]

**Table S14. IgA intervals (and number of individuals) used in GWAS, specified for each breed.**

| <b>Two percentile groups</b>    | <b>GSD</b>      | <b>GR</b>      | <b>LR</b>      | <b>SP</b>      |
|---------------------------------|-----------------|----------------|----------------|----------------|
| group 1 < 25 % perc. (cases)    | 0.02-0.13 (133) | 0.03-0.09 (56) | 0.03-0.09 (41) | 0.01-0.04 (29) |
| group 2 > 75 % perc. (controls) | 0.33-1.35 (129) | 0.34-1.12 (41) | 0.33-1.22 (36) | 0.14-0.56 (24) |
| <b>Three percentile groups</b>  | <b>GSD</b>      | <b>GR</b>      | <b>LR</b>      | <b>SP</b>      |
| group 1 < 33,3 % perc.          | 0.02-0.15 (168) | 0.03-0.12 (57) | 0.03-0.11 (50) | 0.01-0.05 (36) |
| group 2 33,3-66,7 % perc.       | 0.16-0.28 (168) | 0.13-0.27 (56) | 0.12-0.27 (46) | 0.06-0.11 (30) |
| group 3 >66,7 % perc.           | 0.29-1.35 (160) | 0.28-1.12 (56) | 0.28-1.22 (45) | 0.12-0.56 (28) |
| <b>Four percentile groups</b>   | <b>GSD</b>      | <b>GR</b>      | <b>LR</b>      | <b>SP</b>      |
| group 1 < 25 % perc.            | 0.02-0.13 (133) | 0.03-0.10 (56) | 0.03-0.10 (41) | 0.01-0.04 (29) |
| group 2 25-50 % perc.           | 0.14-0.21 (118) | 0.11-0.18 (33) | 0.11-0.19 (34) | 0.05-0.07 (19) |
| group 3 50-75 % perc.           | 0.22-0.32 (124) | 0.19-0.33 (39) | 0.20-0.32 (34) | 0.08-0.14 (26) |
| group 4 > 75 % perc.            | 0.32-1.35 (121) | 0.34-1.12 (41) | 0.33-1.22 (32) | 0.15-0.56 (20) |
| <b>Five percentile groups</b>   | <b>GSD</b>      | <b>GR</b>      | <b>LR</b>      | <b>SP</b>      |
| group 1 < 20 % perc.            | 0.02-0.12 (100) | 0.03-0.09 (44) | 0.03-0.09 (41) | 0.01-0.04 (29) |
| group 2 20-40 % perc.           | 0.13-0.18 (111) | 0.10-0.15 (30) | 0.10-0.14 (17) | 0.05-0.06 (19) |
| group 3 40-60 % perc.           | 0.19-0.25 (90)  | 0.16-0.23 (30) | 0.15-0.23 (33) | 0.07-0.08 (10) |
| group 4 60-80 % perc.           | 0.26-0.36 (102) | 0.24-0.40 (32) | 0.24-0.41 (24) | 0.09-0.17 (17) |
| group 5 > 80 % perc.            | 0.37-1.35 (93)  | 0.41-1.12 (33) | 0.42-1.22 (26) | 0.18-0.56 (19) |
