# Supplementary material for: Genome-Wide Analyses Suggest Mechanisms Involving Early B-Cell Development in Canine IgA Deficiency
Source: PubMed Central journal article supplement (PMC4520476; doi:10.1371/journal.pone.0133844), 2015-07-30
Supplement: pone.0133844.s025.pdf [file pone.0133844.s025.pdf]

**Table S15. The complete set of control breeds**

| <b>IgA control breeds</b>     | <b>N</b>   | <b>IgA risk breeds</b> | <b>N</b> |
|-------------------------------|------------|------------------------|----------|
| Bernese Mountain Dog          | 12         | GSD                    | 370      |
| Border Collie                 | 14         | SP                     | 94       |
| Border Terrier                | 25         | GR                     | 185      |
| Boxer                         | 2          | LR                     | 302      |
| Brittany Spaniel              | 12         |                        |          |
| Cavalier King Charles Spaniel | 2          |                        |          |
| Cocker Spaniel                | 14         |                        |          |
| Dachshund                     | 12         |                        |          |
| Dalmatian                     | 7          |                        |          |
| Doberman Pinscher             | 25         |                        |          |
| English Bulldog               | 12         |                        |          |
| English Setter                | 12         |                        |          |
| Eurasian                      | 12         |                        |          |
| Finnish Spitz                 | 12         |                        |          |
| Gordon Setter                 | 25         |                        |          |
| Greyhound                     | 11         |                        |          |
| Greenland Sledge Dog          | 12         |                        |          |
| Irish Wolfhound               | 11         |                        |          |
| Jack Russell Terrier          | 12         |                        |          |
| Newfoundland                  | 25         |                        |          |
| Poodle                        | 11         |                        |          |
| Rottweiler                    | 12         |                        |          |
| Schipperke                    | 25         |                        |          |
| Standard Poodle               | 21         |                        |          |
| Terrier Yorkshire             | 12         |                        |          |
| <b>In total 25 breeds</b>     | <b>350</b> |                        |          |
