# Supplementary material for: Genome-Wide Analyses Suggest Mechanisms Involving Early B-Cell Development in Canine IgA Deficiency
Source: PubMed Central journal article supplement (PMC4520476; doi:10.1371/journal.pone.0133844), 2015-07-30
Supplement: pone.0133844.s026.pdf [file pone.0133844.s026.pdf]

Table S16. Allele frequencies based on eight breeds (160 dogs) across chr28: 9000091-11999424 (canfam3)

| CHROM | POS     | N_ALLELES | N_CHR | {ALLELE:FREQ}                                                                                                       |
|-------|---------|-----------|-------|---------------------------------------------------------------------------------------------------------------------|
| chr28 | 9000091 | 2         | 312   | T:0.900641 C:0.099359                                                                                               |
| chr28 | 9000246 | 2         | 304   | T:0.947368 TCAA:0.0526316                                                                                           |
| chr28 | 9000473 | 2         | 302   | A:0.933775 G:0.0662252                                                                                              |
| chr28 | 9000522 | 2         | 312   | T:0.935897 C:0.0641026                                                                                              |
| chr28 | 9000657 | 2         | 308   | C:0.935065 CTTTAT:0.0649351                                                                                         |
| chr28 | 9000789 | 2         | 302   | T:0.943709 C:0.0562914                                                                                              |
| chr28 | 9000939 | 2         | 312   | CGG:0.923077 C:0.0769231                                                                                            |
| chr28 | 9001032 | 2         | 300   | C:0.923333 G:0.0766667                                                                                              |
| chr28 | 9001109 | 2         | 292   | C:0.945205 G:0.0547945                                                                                              |
| chr28 | 9001229 | 5         | 318   | GAGAGAAGAGA:0.213836 G:<br>0.132075 GAGAGA:0.273585 GAGAGAAGAGAAGAGA:0.110063<br>GAGAGAAGAGAAGAGAAGAGAAGAGA:0.27044 |
| chr28 | 9001674 | 2         | 310   | G:0.93871 A:0.0612903                                                                                               |
| chr28 | 9001787 | 2         | 298   | CA:0.95302 C:0.0469799                                                                                              |
| chr28 | 9001833 | 2         | 312   | A:0.939103 G:0.0608974                                                                                              |
| chr28 | 9001982 | 2         | 310   | AT:0.951613 A:0.0483871                                                                                             |
| chr28 | 9002236 | 2         | 314   | ATCCAGGAC:0.920382 A:<br>0.0796178                                                                                  |
| chr28 | 9002267 | 2         | 298   | C:0.936242 T:0.0637584                                                                                              |
| chr28 | 9002509 | 2         | 300   | C:0.853333 T:0.146667                                                                                               |
| chr28 | 9002784 | 2         | 304   | A:0.9375 G:0.0625                                                                                                   |
| chr28 | 9002831 | 2         | 302   | C:0.927152 T:0.0728477                                                                                              |
| chr28 | 9003437 | 2         | 298   | T:0.936242 C:0.0637584                                                                                              |
| chr28 | 9003632 | 2         | 288   | G:0.947917 GCTCT:0.0520833                                                                                          |
| chr28 | 9003633 | 2         | 288   | C:0.940972 CTCTT:0.0590278                                                                                          |
| chr28 | 9003904 | 2         | 298   | C:0.92953 T:0.0704698                                                                                               |
| chr28 | 9004320 | 2         | 298   | A:0.869128 C:0.130872                                                                                               |
| chr28 | 9004520 | 2         | 310   | A:0.86129 C:0.13871                                                                                                 |
| chr28 | 9004564 | 2         | 294   | A:0.92517 G:0.0748299                                                                                               |
| chr28 | 9004919 | 2         | 300   | T:0.94 C:0.06                                                                                                       |
| chr28 | 9005309 | 2         | 310   | A:0.883871 G:0.116129                                                                                               |
| chr28 | 9005338 | 2         | 304   | T:0.930921 C:0.0690789                                                                                              |
| chr28 | 9005502 | 2         | 316   | G:0.949367 C:0.0506329                                                                                              |
| chr28 | 9005638 | 2         | 318   | G:0.962264 A:0.0377358                                                                                              |
| chr28 | 9005688 | 2         | 312   | A:0.929487 C:0.0705128                                                                                              |
| chr28 | 9006019 | 2         | 296   | A:0.935811 AC:0.0641892                                                                                             |
| chr28 | 9006568 | 2         | 284   | T:0.855634 TA:0.144366                                                                                              |
| chr28 | 9007042 | 2         | 292   | A:0.945205 C:0.0547945                                                                                              |
| chr28 | 9007529 | 2         | 310   | CA:0.945161 C:0.0548387                                                                                             |
| chr28 | 9008103 | 2         | 300   | T:0.966667 C:0.0333333                                                                                              |
| chr28 | 9008419 | 2         | 304   | C:0.967105 T:0.0328947                                                                                              |
| chr28 | 9008506 | 2         | 290   | CAGAG:0.944828 C:0.0551724                                                                                          |
| chr28 | 9008594 | 2         | 274   | C:0.959854 T:0.040146                                                                                               |
| chr28 | 9008801 | 2         | 308   | C:0.951299 CA:0.0487013                                                                                             |
| chr28 | 9008900 | 2         | 280   | T:0.878571 TA:0.121429                                                                                              |
| chr28 | 9009257 | 2         | 298   | A:0.895973 G:0.104027                                                                                               |
| chr28 | 9009318 | 2         | 286   | G:0.968531 A:0.0314685                                                                                              |
| chr28 | 9009369 | 2         | 300   | AAC:0.976667 A:0.0233333                                                                                            |
| chr28 | 9009943 | 2         | 300   | C:0.976667 T:0.0233333                                                                                              |
| chr28 | 9010058 | 2         | 308   | GTT:0.970779 G:0.0292208                                                                                            |
| chr28 | 9010471 | 2         | 300   | G:0.956667 A:0.0433333                                                                                              |

|                 |         |               |     |                      |                |
|-----------------|---------|---------------|-----|----------------------|----------------|
| chr28           | 9011133 | 2             | 304 | A:0.963816           | C:0.0361842    |
| chr28           | 9011297 | 2             | 304 | G:0.973684           | A:0.0263158    |
| chr28           | 9011572 | 2             | 302 | A:0.97351            | T:0.0264901    |
| chr28           | 9011586 | 2             | 304 | TGTA:0.970395        | T:0.0296053    |
| chr28           | 9012020 | 2             | 316 | CCTTTCTTTCT:0.914557 | C:             |
| 0.085443        |         |               |     |                      |                |
| chr28           | 9012155 | 2             | 302 | C:0.97351            | T:0.0264901    |
| chr28           | 9012207 | 2             | 312 | GCTC:0.964744        | G:0.0352564    |
| chr28           | 9012229 | 2             | 312 | G:0.964744           | T:0.0352564    |
| chr28           | 9012232 | 2             | 312 | A:0.964744           | C:0.0352564    |
| chr28           | 9012244 | 2             | 312 | C:0.964744           | T:0.0352564    |
| chr28           | 9012364 | 2             | 306 | G:0.96732            | A:0.0326797    |
| chr28           | 9012499 | 2             | 282 | C:0.960993           | T:0.0390071    |
| chr28           | 9012965 | 2             | 304 | G:0.967105           | A:0.0328947    |
| chr28           | 9013095 | 2             | 310 | C:0.970968           | G:0.0290323    |
| chr28           | 9013098 | 2             | 308 | A:0.805195           | G:0.194805     |
| chr28           | 9013127 | 2             | 302 | T:0.966887           | C:0.0331126    |
| chr28           | 9013382 | 2             | 296 | T:0.807432           | C:0.192568     |
| chr28           | 9013443 | 2             | 314 | G:0.961783           | A:0.0382166    |
| chr28           | 9013453 | 2             | 314 | G:0.961783           | A:0.0382166    |
| chr28           | 9013626 | 2             | 316 | C:0.85443            | T:0.14557      |
| chr28           | 9013745 | 2             | 300 | T:0.8                | C:0.2          |
| chr28           | 9013848 | 2             | 308 | C:0.974026           | T:0.025974     |
| chr28           | 9013894 | 2             | 302 | C:0.970199           | T:0.0298013    |
| chr28           | 9013951 | 2             | 308 | C:0.961039           | G:0.038961     |
| chr28           | 9014048 | 2             | 312 | G:0.964744           | A:0.0352564    |
| chr28           | 9014089 | 2             | 306 | A:0.781046           | C:0.218954     |
| chr28           | 9014093 | 2             | 300 | C:0.936667           | CA:0.0633333   |
| chr28           | 9014112 | 2             | 296 | T:0.797297           | C:0.202703     |
| chr28           | 9014138 | 2             | 298 | T:0.808725           | G:0.191275     |
| chr28           | 9014282 | 2             | 312 | C:0.830128           | T:0.169872     |
| chr28           | 9014788 | 2             | 314 | G:0.974522           | GTCA:0.0254777 |
| chr28           | 9014789 | 2             | 314 | G:0.974522           | GGATCCTGATC:   |
| 0.0254777       |         |               |     |                      |                |
| chr28           | 9014793 | 2             | 314 | C:0.974522           | T:0.0254777    |
| chr28           | 9014795 | 2             | 314 | CG:0.974522          | C:0.0254777    |
| chr28           | 9014797 | 2             | 314 | G:0.974522           | T:0.0254777    |
| chr28           | 9014841 | 2             | 304 | C:0.825658           | T:0.174342     |
| chr28           | 9014988 | 2             | 306 | G:0.826797           | T:0.173203     |
| chr28           | 9015209 | 2             | 310 | CAT:0.835484         | C:0.164516     |
| chr28           | 9015491 | 2             | 308 | A:0.980519           | G:0.0194805    |
| chr28           | 9015823 | 2             | 310 | T:0.832258           | A:0.167742     |
| chr28           | 9016088 | 2             | 298 | C:0.973154           | G:0.0268456    |
| chr28           | 9016103 | 2             | 304 | A:0.819079           | G:0.180921     |
| chr28           | 9016322 | 2             | 312 | A:0.932692           | AAT:0.0673077  |
| chr28           | 9016326 | 2             | 308 | CACAT:0.964286       | C:0.0357143    |
| chr28           | 9016330 | 5             | 314 | T:0.461783           | C:0.133758     |
| TAC:0.194268    |         | TACAC:0.10828 |     | TACACAC:0.101911     |                |
| chr28           | 9016360 | 3             | 314 | C:0.863057           | G:0.0636943    |
| CACAG:0.0732484 |         |               |     |                      |                |
| chr28           | 9016682 | 2             | 302 | G:0.980132           | GA:0.0198675   |
| chr28           | 9016800 | 2             | 312 | T:0.971154           | A:0.0288462    |
| chr28           | 9016982 | 2             | 288 | A:0.961806           | G:0.0381944    |
| chr28           | 9017130 | 3             | 306 | GAA:0.718954         | G:0.0326797    |

GA:0.248366

|       |         |   |     |                        |                |
|-------|---------|---|-----|------------------------|----------------|
| chr28 | 9017172 | 2 | 302 | A:0.834437             | AAAGC:0.165563 |
| chr28 | 9017284 | 2 | 302 | C:0.97351              | T:0.0264901    |
| chr28 | 9017304 | 2 | 302 | T:0.97351              | G:0.0264901    |
| chr28 | 9017446 | 2 | 286 | C:0.972028             | T:0.027972     |
| chr28 | 9017524 | 2 | 272 | TCTCTCC:0.863971       | T:0.136029     |
| chr28 | 9017528 | 2 | 276 | TCC:0.431159           | T:0.568841     |
| chr28 | 9017953 | 2 | 298 | G:0.812081             | A:0.187919     |
| chr28 | 9018548 | 2 | 310 | T:0.13871              | G:0.86129      |
| chr28 | 9018662 | 2 | 292 | C:0.965753             | G:0.0342466    |
| chr28 | 9018674 | 2 | 282 | TA:0.794326            | T:0.205674     |
| chr28 | 9018856 | 5 | 312 | CAAATAAATAAAT:0.532051 | C:             |

0.112179 CTAAAT:0.0512821 CTAATAAAT:0.0480769  
CAAATAAATAAATAAAT:0.25641

|       |         |   |     |              |                   |
|-------|---------|---|-----|--------------|-------------------|
| chr28 | 9018860 | 2 | 312 | T:0.964744   | TCTC:0.0352564    |
| chr28 | 9018864 | 2 | 310 | T:0.977419   | TCTC:0.0225806    |
| chr28 | 9019603 | 2 | 300 | C:0.84       | T:0.16            |
| chr28 | 9019751 | 2 | 292 | A:0.849315   | AT:0.150685       |
| chr28 | 9020694 | 2 | 308 | C:0.798701   | CAAAT:0.201299    |
| chr28 | 9020794 | 2 | 302 | A:0.966887   | G:0.0331126       |
| chr28 | 9020798 | 2 | 302 | A:0.966887   | G:0.0331126       |
| chr28 | 9021002 | 2 | 292 | A:0.821918   | T:0.178082        |
| chr28 | 9022289 | 2 | 308 | C:0.834416   | T:0.165584        |
| chr28 | 9022290 | 2 | 308 | A:0.811688   | G:0.188312        |
| chr28 | 9022351 | 2 | 308 | C:0.814935   | T:0.185065        |
| chr28 | 9022352 | 2 | 308 | G:0.814935   | A:0.185065        |
| chr28 | 9022420 | 2 | 314 | G:0.869427   | T:0.130573        |
| chr28 | 9022668 | 2 | 306 | AG:0.836601  | A:0.163399        |
| chr28 | 9022984 | 2 | 254 | C:0.834646   | CT:0.165354       |
| chr28 | 9023016 | 2 | 268 | G:0.835821   | T:0.164179        |
| chr28 | 9023157 | 2 | 310 | C:0.967742   | CTGTGTG:0.0322581 |
| chr28 | 9023159 | 3 | 312 | CTG:0.913462 | C:0.0544872       |

GTG:0.0320513

|       |         |   |     |              |                |
|-------|---------|---|-----|--------------|----------------|
| chr28 | 9023202 | 2 | 288 | T:0.951389   | TA:0.0486111   |
| chr28 | 9023408 | 2 | 292 | G:0.832192   | GTAAA:0.167808 |
| chr28 | 9023450 | 3 | 306 | TGA:0.647059 | T:0.222222     |

TGAGA:0.130719

|       |         |   |     |            |               |
|-------|---------|---|-----|------------|---------------|
| chr28 | 9023552 | 2 | 288 | G:0.829861 | GATC:0.170139 |
| chr28 | 9024684 | 2 | 290 | A:0.968966 | G:0.0310345   |
| chr28 | 9024720 | 4 | 286 | T:0.402098 | TA:0.181818   |

TAA:0.286713 TAAA:0.129371

|       |         |   |     |            |              |
|-------|---------|---|-----|------------|--------------|
| chr28 | 9024730 | 2 | 308 | A:0.801948 | AAAAAAAAAAG: |
|-------|---------|---|-----|------------|--------------|

0.198052

|       |         |   |     |              |              |
|-------|---------|---|-----|--------------|--------------|
| chr28 | 9024778 | 2 | 288 | C:0.836806   | T:0.163194   |
| chr28 | 9025290 | 2 | 312 | C:0.836538   | T:0.163462   |
| chr28 | 9025339 | 2 | 300 | T:0.956667   | TG:0.0433333 |
| chr28 | 9025345 | 2 | 300 | A:0.956667   | T:0.0433333  |
| chr28 | 9025361 | 2 | 298 | T:0.845638   | A:0.154362   |
| chr28 | 9025362 | 2 | 298 | A:0.845638   | T:0.154362   |
| chr28 | 9025730 | 2 | 262 | AAT:0.942748 | A:0.0572519  |
| chr28 | 9025731 | 2 | 252 | AT:0.198413  | A:0.801587   |
| chr28 | 9025899 | 2 | 254 | C:0.952756   | T:0.0472441  |
| chr28 | 9026013 | 2 | 312 | TG:0.846154  | T:0.153846   |
| chr28 | 9026014 | 2 | 312 | G:0.967949   | T:0.0320513  |

|                             |         |   |     |                            |                |
|-----------------------------|---------|---|-----|----------------------------|----------------|
| chr28                       | 9026018 | 2 | 312 | T:0.846154                 | A:0.153846     |
| chr28                       | 9026023 | 2 | 312 | T:0.846154                 | A:0.153846     |
| chr28                       | 9026048 | 2 | 312 | C:0.817308                 | T:0.182692     |
| chr28                       | 9026069 | 2 | 312 | G:0.967949                 | C:0.0320513    |
| chr28                       | 9026275 | 3 | 300 | TAA:0.626667               | T:0.163333     |
| TA:0.21                     |         |   |     |                            |                |
| chr28                       | 9026405 | 2 | 290 | G:0.834483                 | A:0.165517     |
| chr28                       | 9026635 | 2 | 298 | A:0.842282                 | G:0.157718     |
| chr28                       | 9026679 | 2 | 282 | T:0.826241                 | C:0.173759     |
| chr28                       | 9026960 | 2 | 300 | A:0.856667                 | G:0.143333     |
| chr28                       | 9027069 | 2 | 294 | C:0.823129                 | A:0.176871     |
| chr28                       | 9028226 | 2 | 310 | C:0.832258                 | T:0.167742     |
| chr28                       | 9028471 | 2 | 314 | C:0.961783                 | T:0.0382166    |
| chr28                       | 9029031 | 2 | 298 | C:0.838926                 | CA:0.161074    |
| chr28                       | 9029032 | 2 | 318 | A:0.940252                 |                |
| AAAAAAAAAATAAAAAT:0.0597484 |         |   |     |                            |                |
| chr28                       | 9029064 | 2 | 310 | T:0.812903                 | C:0.187097     |
| chr28                       | 9029759 | 2 | 278 | C:0.766187                 | CT:0.233813    |
| chr28                       | 9029808 | 2 | 314 | CACAGAGAGAGAGAGAG:0.796178 |                |
| C:0.203822                  |         |   |     |                            |                |
| chr28                       | 9029810 | 3 | 314 | CAG:0.43949                | C:0.433121     |
| CAGAG:0.127389              |         |   |     |                            |                |
| chr28                       | 9029956 | 2 | 294 | G:0.795918                 | GAGCC:0.204082 |
| chr28                       | 9030144 | 2 | 304 | A:0.871711                 | G:0.128289     |
| chr28                       | 9030185 | 2 | 302 | T:0.791391                 | A:0.208609     |
| chr28                       | 9030186 | 2 | 302 | T:0.966887                 | A:0.0331126    |
| chr28                       | 9030657 | 2 | 290 | G:0.975862                 | A:0.0241379    |
| chr28                       | 9030699 | 2 | 292 | C:0.876712                 | T:0.123288     |
| chr28                       | 9031234 | 2 | 286 | G:0.958042                 | A:0.041958     |
| chr28                       | 9031701 | 2 | 300 | C:0.96                     | T:0.04         |
| chr28                       | 9031738 | 2 | 298 | T:0.828859                 | C:0.171141     |
| chr28                       | 9031741 | 3 | 286 | GT:0.601399                | G:0.304196     |
| GTT:0.0944056               |         |   |     |                            |                |
| chr28                       | 9032465 | 2 | 302 | A:0.993377                 | G:0.00662252   |
| chr28                       | 9033585 | 2 | 296 | T:0.827703                 | A:0.172297     |
| chr28                       | 9033586 | 2 | 296 | T:0.827703                 | C:0.172297     |
| chr28                       | 9033837 | 2 | 204 | TA:0.637255                | T:0.362745     |
| chr28                       | 9034448 | 2 | 306 | G:0.964052                 | A:0.0359477    |
| chr28                       | 9035127 | 2 | 308 | C:0.827922                 | CTTAT:0.172078 |
| chr28                       | 9035331 | 2 | 310 | T:0.829032                 | TAATA:0.170968 |
| chr28                       | 9036932 | 2 | 308 | T:0.831169                 | C:0.168831     |
| chr28                       | 9037083 | 2 | 308 | T:0.321429                 | C:0.678571     |
| chr28                       | 9037089 | 2 | 308 | T:0.850649                 | C:0.149351     |
| chr28                       | 9037329 | 2 | 302 | G:0.980132                 | A:0.0198675    |
| chr28                       | 9037585 | 2 | 302 | G:0.831126                 | GA:0.168874    |
| chr28                       | 9037594 | 2 | 302 | C:0.956954                 | A:0.0430464    |
| chr28                       | 9037846 | 2 | 300 | CTG:0.966667               | C:0.0333333    |
| chr28                       | 9038349 | 2 | 308 | A:0.831169                 | G:0.168831     |
| chr28                       | 9038962 | 2 | 298 | G:0.979866                 | A:0.0201342    |
| chr28                       | 9039044 | 2 | 294 | T:0.880952                 | G:0.119048     |
| chr28                       | 9039059 | 2 | 302 | C:0.84106                  | CCTT:0.15894   |
| chr28                       | 9039125 | 2 | 304 | C:0.986842                 | T:0.0131579    |
| chr28                       | 9039672 | 2 | 296 | G:0.905405                 | A:0.0945946    |
| chr28                       | 9039766 | 2 | 302 | G:0.900662                 | C:0.0993377    |

|       |                       |   |                                 |                            |                 |
|-------|-----------------------|---|---------------------------------|----------------------------|-----------------|
| chr28 | 9040250               | 2 | 294                             | T:0.87415                  | C:0.12585       |
| chr28 | 9040258               | 2 | 298                             | GC:0.815436                | G:0.184564      |
| chr28 | 9040648               | 2 | 310                             | G:0.906452                 | C:0.0935484     |
| chr28 | 9040777               | 2 | 306                             | C:0.915033                 | CACTA:0.0849673 |
| chr28 | 9040794               | 2 | 298                             | A:0.912752                 | G:0.0872483     |
| chr28 | 9040979               | 2 | 296                             | T:0.915541                 | C:0.0844595     |
| chr28 | 9040991               | 2 | 294                             | ACT:0.914966               | A:0.085034      |
| chr28 | 9041256               | 2 | 290                             | G:0.986207                 | A:0.0137931     |
| chr28 | 9041508               | 2 | 302                             | A:0.976821                 | C:0.0231788     |
| chr28 | 9041559               | 2 | 280                             | G:0.917857                 | A:0.0821429     |
| chr28 | 9041584               | 2 | 286                             | CTT:0.912587               | C:0.0874126     |
| chr28 | 9042088               | 2 | 304                             | G:0.901316                 | A:0.0986842     |
| chr28 | 9042090               | 2 | 304                             | A:0.901316                 | T:0.0986842     |
| chr28 | 9042656               | 2 | 302                             | T:0.900662                 | G:0.0993377     |
| chr28 | 9042713               | 2 | 304                             | C:0.983553                 | T:0.0164474     |
| chr28 | 9043052               | 2 | 298                             | GC:0.899329                | G:0.100671      |
| chr28 | 9046466               | 2 | 294                             | G:0.918367                 | A:0.0816327     |
| chr28 | 9046907               | 2 | 308                             | A:0.928571                 | AAC:0.0714286   |
| chr28 | 9047244               | 2 | 300                             | A:0                        | G:1             |
| chr28 | 9047405               | 2 | 298                             | G:0.899329                 | A:0.100671      |
| chr28 | 9047791               | 2 | 284                             | T:0.0105634                | TG:0.989437     |
| chr28 | 9048050               | 2 | 272                             | T:0.930147                 | C:0.0698529     |
| chr28 | 9048208               | 2 | 246                             | AT:0                       | A:1             |
| chr28 | 9048224               | 2 | 194                             | T:0.912371                 | C:0.0876289     |
| chr28 | 9048896               | 2 | 296                             | GC:0.898649                | G:0.101351      |
| chr28 | 9049363               | 2 | 320                             | AAAG:0.903125              | A:0.096875      |
| chr28 | 9049366               | 3 | 318                             | GAAGAAAGAAAGAAAGA:0.484277 |                 |
|       | G:0.339623            |   | GAAGA:0.176101                  |                            |                 |
| chr28 | 9049429               | 2 | 320                             | G:0.903125                 | GA:0.096875     |
| chr28 | 9050173               | 2 | 290                             | TG:0.913793                | T:0.0862069     |
| chr28 | 9050240               | 2 | 308                             | A:0.909091                 | C:0.0909091     |
| chr28 | 9051784               | 2 | 300                             | G:0.903333                 | C:0.0966667     |
| chr28 | 9051823               | 2 | 302                             | C:0.903974                 | T:0.0960265     |
| chr28 | 9051826               | 2 | 302                             | C:0.903974                 | T:0.0960265     |
| chr28 | 9052674               | 2 | 306                             | A:0.905229                 | T:0.0947712     |
| chr28 | 9052923               | 2 | 278                             | G:0.910072                 | A:0.0899281     |
| chr28 | 9052947               | 4 | 298                             | AACACACAC:0.244966         | A:              |
|       | 0.281879 AAC:0.352349 |   | AACAC:0.120805                  |                            |                 |
| chr28 | 9053125               | 2 | 296                             | G:0.908784                 | A:0.0912162     |
| chr28 | 9053140               | 2 | 302                             | A:0.97351                  | G:0.0264901     |
| chr28 | 9053532               | 2 | 300                             | G:0.9                      | C:0.1           |
| chr28 | 9055264               | 2 | 300                             | GT:0.356667                | G:0.643333      |
| chr28 | 9056134               | 2 | 310                             | GGCAGCCCCCGTGGT:0.916129   | G:              |
|       | 0.083871              |   |                                 |                            |                 |
| chr28 | 9056143               | 2 | 310                             | C:0.941935                 | G:0.0580645     |
| chr28 | 9056457               | 2 | 298                             | A:0.919463                 | G:0.0805369     |
| chr28 | 9057481               | 2 | 304                             | T:0.986842                 | A:0.0131579     |
| chr28 | 9058292               | 2 | 294                             | T:0.891156                 | TA:0.108844     |
| chr28 | 9059203               | 2 | 274                             | ATTTCTT:0.959854           | A:0.040146      |
| chr28 | 9059843               | 2 | 308                             | G:0.996753                 | C:0.00324675    |
| chr28 | 9060075               | 4 | 314                             | TACAAA:0.840764            | T:0.0764331     |
|       | TACAAAACAAA:0.0414013 |   | TACAAAACAAAACAAAACAAA:0.0414013 |                            |                 |
| chr28 | 9060852               | 2 | 302                             | C:0.450331                 | T:0.549669      |
| chr28 | 9061609               | 2 | 296                             | A:0.942568                 | C:0.0574324     |

|                                                 |         |   |     |                    |                   |
|-------------------------------------------------|---------|---|-----|--------------------|-------------------|
| chr28                                           | 9061679 | 2 | 302 | A:0.94702          | G:0.0529801       |
| chr28                                           | 9061900 | 2 | 300 | C:0.936667         | T:0.0633333       |
| chr28                                           | 9062033 | 2 | 296 | TCGCTCACA:0.942568 | T:                |
| 0.0574324                                       |         |   |     |                    |                   |
| chr28                                           | 9062147 | 2 | 298 | G:0.936242         | A:0.0637584       |
| chr28                                           | 9062361 | 3 | 222 | TGG:0.716216       | T:0.130631        |
| TG:0.153153                                     |         |   |     |                    |                   |
| chr28                                           | 9063282 | 2 | 170 | AC:0.835294        | A:0.164706        |
| chr28                                           | 9063400 | 2 | 220 | G:0.522727         | C:0.477273        |
| chr28                                           | 9064386 | 2 | 278 | C:0.820144         | CTT:0.179856      |
| chr28                                           | 9064472 | 2 | 302 | G:0.857616         | GC:0.142384       |
| chr28                                           | 9064477 | 2 | 302 | G:0.857616         | C:0.142384        |
| chr28                                           | 9064668 | 2 | 308 | G:0.987013         | T:0.012987        |
| chr28                                           | 9065709 | 2 | 306 | GA:0.954248        | G:0.0457516       |
| chr28                                           | 9066664 | 2 | 306 | G:0.872549         | A:0.127451        |
| chr28                                           | 9066770 | 2 | 304 | A:0.855263         | G:0.144737        |
| chr28                                           | 9067055 | 2 | 304 | G:0.871711         | A:0.128289        |
| chr28                                           | 9068116 | 2 | 312 | A:0.564103         | AAAAG:0.435897    |
| chr28                                           | 9068122 | 2 | 316 | A:0.901899         | AAGAAAG:0.0981013 |
| chr28                                           | 9068140 | 2 | 308 | G:0.886364         | A:0.113636        |
| chr28                                           | 9068147 | 2 | 316 | A:0.914557         | AAAG:0.085443     |
| chr28                                           | 9068158 | 3 | 316 | G:0.462025         | GAAGA:0.240506    |
| GGAAGAAAGAAAGAAAGGAAGGAAGAAAGAAAGAAAGA:0.297468 |         |   |     |                    |                   |
| chr28                                           | 9068456 | 2 | 306 | C:0.859477         | T:0.140523        |
| chr28                                           | 9068849 | 2 | 316 | T:0.863924         | TAAAAAA:0.136076  |
| chr28                                           | 9068872 | 2 | 310 | GGAATA:0.893548    | G:0.106452        |
| chr28                                           | 9069173 | 2 | 304 | G:0.845395         | A:0.154605        |
| chr28                                           | 9069266 | 2 | 298 | A:0.875839         | G:0.124161        |
| chr28                                           | 9069399 | 2 | 244 | C:0.668033         | CA:0.331967       |
| chr28                                           | 9069746 | 2 | 294 | T:0.853741         | C:0.146259        |
| chr28                                           | 9070332 | 2 | 302 | A:0.857616         | AGT:0.142384      |
| chr28                                           | 9071571 | 2 | 306 | G:0.937908         | T:0.0620915       |
| chr28                                           | 9071574 | 2 | 308 | G:0.873377         | T:0.126623        |
| chr28                                           | 9071694 | 2 | 310 | A:0.887097         | G:0.112903        |
| chr28                                           | 9071730 | 2 | 296 | G:0.935811         | T:0.0641892       |
| chr28                                           | 9072256 | 2 | 298 | T:0.88255          | A:0.11745         |
| chr28                                           | 9073177 | 3 | 304 | TAA:0.536184       | T:0.118421        |
| TA:0.345395                                     |         |   |     |                    |                   |
| chr28                                           | 9073184 | 2 | 306 | A:0.800654         | T:0.199346        |
| chr28                                           | 9073654 | 2 | 306 | T:0.866013         | G:0.133987        |
| chr28                                           | 9073869 | 2 | 290 | T:0.862069         | C:0.137931        |
| chr28                                           | 9073993 | 2 | 308 | A:0.720779         | AT:0.279221       |
| chr28                                           | 9073995 | 2 | 308 | A:0.720779         | T:0.279221        |
| chr28                                           | 9074033 | 2 | 302 | CAGATAGAG:0.715232 | C:                |
| 0.284768                                        |         |   |     |                    |                   |
| chr28                                           | 9074037 | 3 | 306 | TAGAGAG:0.781046   | T:0.0294118       |
| TAGAG:0.189542                                  |         |   |     |                    |                   |
| chr28                                           | 9074750 | 2 | 304 | TA:0.723684        | T:0.276316        |
| chr28                                           | 9075130 | 2 | 306 | C:0.699346         | T:0.300654        |
| chr28                                           | 9075511 | 2 | 318 | CT:0.710692        | C:0.289308        |
| chr28                                           | 9075676 | 2 | 302 | A:0.705298         | G:0.294702        |
| chr28                                           | 9075684 | 2 | 302 | T:0.705298         | A:0.294702        |
| chr28                                           | 9076002 | 2 | 294 | C:0.952381         | T:0.047619        |
| chr28                                           | 9076092 | 2 | 306 | G:0.732026         | C:0.267974        |

|                 |         |   |     |                |              |
|-----------------|---------|---|-----|----------------|--------------|
| chr28           | 9076158 | 2 | 304 | T:0.733553     | C:0.266447   |
| chr28           | 9076182 | 2 | 304 | T:0.733553     | C:0.266447   |
| chr28           | 9076673 | 2 | 308 | CA:0.733766    | C:0.266234   |
| chr28           | 9076764 | 2 | 298 | T:0.724832     | C:0.275168   |
| chr28           | 9076812 | 2 | 308 | G:0.737013     | T:0.262987   |
| chr28           | 9076821 | 2 | 308 | T:0.737013     | G:0.262987   |
| chr28           | 9076835 | 2 | 308 | G:0.737013     | T:0.262987   |
| chr28           | 9076846 | 2 | 308 | C:0.737013     | T:0.262987   |
| chr28           | 9076857 | 2 | 308 | A:0.737013     | T:0.262987   |
| chr28           | 9076902 | 2 | 288 | T:0.732639     | C:0.267361   |
| chr28           | 9076908 | 2 | 288 | T:0.732639     | C:0.267361   |
| chr28           | 9076958 | 3 | 284 | TA:0.471831    | T:0.253521   |
| TAA:0.274648    |         |   |     |                |              |
| chr28           | 9077225 | 2 | 308 | C:0.733766     | T:0.266234   |
| chr28           | 9077262 | 2 | 304 | T:0.746711     | A:0.253289   |
| chr28           | 9077365 | 2 | 308 | A:0.847403     | G:0.152597   |
| chr28           | 9077504 | 2 | 300 | C:0.753333     | T:0.246667   |
| chr28           | 9077715 | 2 | 306 | T:0.784314     | C:0.215686   |
| chr28           | 9077725 | 3 | 308 | C:0.785714     | CTTT:0.12013 |
| CTTTT:0.0941558 |         |   |     |                |              |
| chr28           | 9078016 | 2 | 308 | GCAGT:0.850649 | G:0.149351   |
| chr28           | 9078201 | 2 | 308 | C:0.733766     | T:0.266234   |
| chr28           | 9078207 | 2 | 308 | A:0.733766     | G:0.266234   |
| chr28           | 9078254 | 2 | 302 | T:0.731788     | G:0.268212   |
| chr28           | 9078267 | 2 | 300 | C:0.73 A:0.27  |              |
| chr28           | 9078294 | 2 | 298 | A:0.731544     | G:0.268456   |
| chr28           | 9078307 | 2 | 306 | T:0.72549      | TG:0.27451   |
| chr28           | 9078314 | 2 | 306 | G:0.72549      | A:0.27451    |
| chr28           | 9078760 | 2 | 302 | C:0.427152     | CT:0.572848  |
| chr28           | 9079172 | 2 | 314 | A:0.735669     | G:0.264331   |
| chr28           | 9079178 | 2 | 314 | G:0.735669     | A:0.264331   |
| chr28           | 9079196 | 2 | 314 | A:0.735669     | G:0.264331   |
| chr28           | 9079218 | 2 | 314 | A:0.735669     | G:0.264331   |
| chr28           | 9079312 | 2 | 308 | C:0.717532     | T:0.282468   |
| chr28           | 9079313 | 2 | 308 | CT:0.717532    | C:0.282468   |
| chr28           | 9079508 | 2 | 286 | C:0.898601     | T:0.101399   |
| chr28           | 9079509 | 2 | 286 | A:0.793706     | G:0.206294   |
| chr28           | 9079784 | 2 | 294 | C:0.959184     | CT:0.0408163 |
| chr28           | 9080212 | 2 | 294 | G:0.952381     | GCC:0.047619 |
| chr28           | 9080216 | 2 | 294 | C:0.952381     | CGA:0.047619 |
| chr28           | 9080219 | 2 | 286 | T:0.84965      | G:0.15035    |
| chr28           | 9080220 | 2 | 286 | C:0.84965      | A:0.15035    |
| chr28           | 9080303 | 2 | 306 | G:0.718954     | A:0.281046   |
| chr28           | 9080344 | 2 | 298 | C:0.993289     | T:0.00671141 |
| chr28           | 9080453 | 2 | 280 | T:0.721429     | C:0.278571   |
| chr28           | 9080484 | 2 | 280 | T:0.742857     | TA:0.257143  |
| chr28           | 9080539 | 2 | 298 | G:0.724832     | A:0.275168   |
| chr28           | 9081156 | 2 | 224 | C:0.839286     | CT:0.160714  |
| chr28           | 9081540 | 2 | 308 | A:0.691558     | C:0.308442   |
| chr28           | 9081732 | 2 | 302 | C:0.701987     | A:0.298013   |
| chr28           | 9082462 | 2 | 300 | C:0.696667     | CT:0.303333  |
| chr28           | 9082581 | 2 | 296 | G:0.706081     | A:0.293919   |
| chr28           | 9082712 | 2 | 308 | CAA:0.720779   | C:0.279221   |
| chr28           | 9082716 | 2 | 310 | T:0.722581     | C:0.277419   |

|              |         |   |     |                  |                  |
|--------------|---------|---|-----|------------------|------------------|
| chr28        | 9082732 | 2 | 312 | C:0.714744       | CTT:0.285256     |
| chr28        | 9082740 | 2 | 310 | C:0.167742       | T:0.832258       |
| chr28        | 9083013 | 2 | 306 | A:0.702614       | G:0.297386       |
| chr28        | 9083057 | 2 | 308 | T:0.698052       | C:0.301948       |
| chr28        | 9083137 | 2 | 306 | C:0.70915        | T:0.29085        |
| chr28        | 9083675 | 2 | 298 | CT:0.808725      | C:0.191275       |
| chr28        | 9084375 | 2 | 302 | CCT:0.715232     | C:0.284768       |
| chr28        | 9084629 | 2 | 298 | G:0.721477       | C:0.278523       |
| chr28        | 9084938 | 2 | 300 | G:0.713333       | A:0.286667       |
| chr28        | 9085196 | 2 | 294 | G:0.727891       | T:0.272109       |
| chr28        | 9085578 | 2 | 304 | G:0.700658       | GCTCTCT:0.299342 |
| chr28        | 9085618 | 2 | 306 | T:0.859477       | A:0.140523       |
| chr28        | 9086088 | 2 | 300 | CTT:0.716667     | C:0.283333       |
| chr28        | 9086258 | 2 | 290 | G:0.710345       | C:0.289655       |
| chr28        | 9086297 | 2 | 308 | CTTTATA:0.905844 | C:0.0941558      |
| chr28        | 9086512 | 2 | 304 | T:0.963816       | C:0.0361842      |
| chr28        | 9086603 | 2 | 310 | T:0.970968       | C:0.0290323      |
| chr28        | 9086707 | 2 | 300 | C:0.856667       | G:0.143333       |
| chr28        | 9086913 | 2 | 296 | T:0.709459       | C:0.290541       |
| chr28        | 9087018 | 2 | 298 | A:0.194631       | C:0.805369       |
| chr28        | 9087957 | 2 | 300 | A:0.696667       | G:0.303333       |
| chr28        | 9088172 | 3 | 294 | TA:0.659864      | T:0.129252       |
| TAA:0.210884 |         |   |     |                  |                  |
| chr28        | 9088444 | 2 | 308 | TAGCTA:0.857143  | T:0.142857       |
| chr28        | 9088609 | 2 | 240 | T:0.666667       | TAA:0.333333     |
| chr28        | 9088684 | 2 | 280 | T:0.696429       | C:0.303571       |
| chr28        | 9088799 | 2 | 226 | T:0.646018       | TAA:0.353982     |
| chr28        | 9088927 | 2 | 296 | C:0.85473        | G:0.14527        |
| chr28        | 9089022 | 2 | 272 | C:0.735294       | A:0.264706       |
| chr28        | 9089105 | 2 | 304 | C:0.845395       | T:0.154605       |
| chr28        | 9089203 | 2 | 314 | T:0.710191       | A:0.289809       |
| chr28        | 9089232 | 2 | 310 | C:0.854839       | CAGAGAG:0.145161 |
| chr28        | 9089415 | 2 | 314 | C:0.840764       | T:0.159236       |
| chr28        | 9090136 | 2 | 302 | G:0.874172       | A:0.125828       |
| chr28        | 9090764 | 2 | 302 | A:0.850993       | C:0.149007       |
| chr28        | 9090988 | 2 | 292 | A:0.678082       | G:0.321918       |
| chr28        | 9091191 | 2 | 294 | C:0.85034        | T:0.14966        |
| chr28        | 9091307 | 2 | 312 | C:0.842949       | T:0.157051       |
| chr28        | 9091652 | 2 | 302 | C:0.864238       | T:0.135762       |
| chr28        | 9091771 | 2 | 300 | GT:0.84 G:0.16   |                  |
| chr28        | 9091923 | 2 | 310 | G:0.825806       | A:0.174194       |
| chr28        | 9092080 | 2 | 306 | C:0.846405       | G:0.153595       |
| chr28        | 9092223 | 2 | 306 | C:0.856209       | T:0.143791       |
| chr28        | 9092909 | 2 | 294 | CT:0.836735      | C:0.163265       |
| chr28        | 9093041 | 2 | 300 | C:0.863333       | T:0.136667       |
| chr28        | 9093112 | 2 | 286 | G:0.853147       | A:0.146853       |
| chr28        | 9093187 | 2 | 296 | CCT:0.689189     | C:0.310811       |
| chr28        | 9093590 | 2 | 278 | CCT:0.81295      | C:0.18705        |
| chr28        | 9093627 | 2 | 292 | TAAAA:0.85274    | T:0.14726        |
| chr28        | 9093630 | 2 | 304 | A:0.980263       | AT:0.0197368     |
| chr28        | 9093633 | 2 | 304 | A:0.980263       | AT:0.0197368     |
| chr28        | 9093635 | 2 | 292 | A:0.85274        | T:0.14726        |
| chr28        | 9093641 | 2 | 304 | A:0.980263       | T:0.0197368      |
| chr28        | 9094162 | 2 | 306 | A:0.722222       | G:0.277778       |



|                         |         |   |     |                   |                 |
|-------------------------|---------|---|-----|-------------------|-----------------|
| chr28                   | 9094920 | 2 | 310 | T:0.851613        | G:0.148387      |
| chr28                   | 9095328 | 2 | 292 | G:0.869863        | A:0.130137      |
| chr28                   | 9095562 | 2 | 298 | CTCTG:0.832215    | C:0.167785      |
| chr28                   | 9095605 | 3 | 292 | AG:0.708904       | A:0.164384      |
| AGG:0.126712            |         |   |     |                   |                 |
| chr28                   | 9095719 | 2 | 302 | G:0.976821        | A:0.0231788     |
| chr28                   | 9095822 | 2 | 300 | G:0.856667        | T:0.143333      |
| chr28                   | 9096051 | 2 | 300 | A:0.86 G:0.14     |                 |
| chr28                   | 9096278 | 2 | 292 | T:0.996575        | G:0.00342466    |
| chr28                   | 9096366 | 2 | 298 | TAC:0.724832      | T:0.275168      |
| chr28                   | 9096449 | 2 | 288 | C:0.989583        | G:0.0104167     |
| chr28                   | 9096503 | 2 | 316 | C:0.629747        | CTTTTTTTTTTTTT: |
| 0.370253                |         |   |     |                   |                 |
| chr28                   | 9096636 | 2 | 290 | T:0.872414        | C:0.127586      |
| chr28                   | 9097105 | 2 | 292 | C:0.869863        | T:0.130137      |
| chr28                   | 9097982 | 2 | 314 | C:0.859873        | T:0.140127      |
| chr28                   | 9098466 | 2 | 310 | T:0.948387        | A:0.0516129     |
| chr28                   | 9098761 | 2 | 302 | AC:0.864238       | A:0.135762      |
| chr28                   | 9099002 | 2 | 308 | C:0.944805        | T:0.0551948     |
| chr28                   | 9099249 | 2 | 304 | T:0.805921        | C:0.194079      |
| chr28                   | 9099266 | 2 | 300 | G:0.953333        | T:0.0466667     |
| chr28                   | 9099550 | 2 | 306 | T:0.95098         | TAA:0.0490196   |
| chr28                   | 9099640 | 2 | 290 | A:0.944828        | C:0.0551724     |
| chr28                   | 9100002 | 2 | 288 | G:0.951389        | A:0.0486111     |
| chr28                   | 9100006 | 2 | 288 | C:0.8125 T:0.1875 |                 |
| chr28                   | 9100067 | 2 | 308 | TTCTC:0.935065    | T:0.0649351     |
| chr28                   | 9100103 | 2 | 306 | GA:0.95098        | G:0.0490196     |
| chr28                   | 9100185 | 2 | 312 | G:0.887821        | C:0.112179      |
| chr28                   | 9100333 | 2 | 278 | T:0.94964         | C:0.0503597     |
| chr28                   | 9100450 | 3 | 316 | C:0.841772        | CTCTG:0.117089  |
| CTCTCTCTCTCTG:0.0411392 |         |   |     |                   |                 |
| chr28                   | 9100716 | 2 | 280 | C:0.95 A:0.05     |                 |
| chr28                   | 9100869 | 2 | 294 | C:0.945578        | T:0.0544218     |
| chr28                   | 9101114 | 2 | 300 | T:0.943333        | C:0.0566667     |
| chr28                   | 9101296 | 2 | 302 | C:0.791391        | G:0.208609      |
| chr28                   | 9102150 | 2 | 298 | A:0.939597        | G:0.0604027     |
| chr28                   | 9102269 | 2 | 296 | G:0.942568        | C:0.0574324     |
| chr28                   | 9102282 | 2 | 300 | A:0.943333        | G:0.0566667     |
| chr28                   | 9102285 | 2 | 300 | G:0.943333        | C:0.0566667     |
| chr28                   | 9102675 | 2 | 294 | CCTGT:0.911565    | C:0.0884354     |
| chr28                   | 9103023 | 2 | 302 | C:0.937086        | T:0.0629139     |
| chr28                   | 9103084 | 2 | 304 | T:0.861842        | A:0.138158      |
| chr28                   | 9103085 | 2 | 304 | T:0.799342        | A:0.200658      |
| chr28                   | 9103207 | 2 | 294 | T:0.94898         | C:0.0510204     |
| chr28                   | 9103230 | 2 | 288 | T:0 C:1           |                 |
| chr28                   | 9103393 | 2 | 308 | T:0.954545        | C:0.0454545     |
| chr28                   | 9103559 | 2 | 294 | G:0.94898         | A:0.0510204     |
| chr28                   | 9104029 | 2 | 316 | A:0.949367        | G:0.0506329     |
| chr28                   | 9104106 | 2 | 302 | C:0.950331        | G:0.0496689     |
| chr28                   | 9104152 | 2 | 310 | TAAC:0.867742     | T:0.132258      |
| chr28                   | 9104461 | 2 | 300 | T:0.953333        | TA:0.0466667    |
| chr28                   | 9104565 | 2 | 306 | CAATT:0.944444    | C:0.0555556     |
| chr28                   | 9104842 | 2 | 312 | C:0.951923        | CTTTCTTTTCT:    |
| 0.0480769               |         |   |     |                   |                 |

|           |         |   |     |                            |                |
|-----------|---------|---|-----|----------------------------|----------------|
| chr28     | 9104935 | 2 | 302 | A:0.953642                 | G:0.0463576    |
| chr28     | 9105010 | 2 | 316 | CTTTTTTTTGTTTT:0.797468 C: |                |
| 0.202532  |         |   |     |                            |                |
| chr28     | 9105019 | 2 | 318 | GT:0.827044                | G:0.172956     |
| chr28     | 9105026 | 2 | 318 | T:0.959119                 | G:0.0408805    |
| chr28     | 9105332 | 2 | 308 | C:0.961039                 | G:0.038961     |
| chr28     | 9105405 | 2 | 306 | G:0.839869                 | A:0.160131     |
| chr28     | 9105780 | 2 | 296 | G:0.972973                 | A:0.027027     |
| chr28     | 9106125 | 2 | 310 | TCTTTCCC:0.935484          | T:             |
| 0.0645161 |         |   |     |                            |                |
| chr28     | 9106133 | 2 | 310 | A:0.935484                 | AGGT:0.0645161 |
| chr28     | 9106477 | 2 | 304 | A:0.9375 G:0.0625          |                |
| chr28     | 9106924 | 2 | 292 | G:0.876712                 | A:0.123288     |
| chr28     | 9107300 | 2 | 300 | G:0.95                     | A:0.05         |
| chr28     | 9107320 | 2 | 292 | C:0.958904                 | T:0.0410959    |
| chr28     | 9107462 | 2 | 310 | G:0.825806                 | C:0.174194     |
| chr28     | 9107744 | 2 | 310 | C:0.86129                  | T:0.13871      |
| chr28     | 9108048 | 2 | 306 | A:0.954248                 | G:0.0457516    |
| chr28     | 9108085 | 2 | 308 | G:0.883117                 | A:0.116883     |
| chr28     | 9108126 | 2 | 308 | T:0.954545                 | C:0.0454545    |
| chr28     | 9108519 | 2 | 296 | CTTT:0.952703              | C:0.0472973    |
| chr28     | 9108535 | 2 | 296 | T:0.925676                 | A:0.0743243    |
| chr28     | 9108685 | 2 | 306 | GAA:0.931373               | G:0.0686275    |
| chr28     | 9108720 | 2 | 312 | T:0.945513                 | C:0.0544872    |
| chr28     | 9108873 | 2 | 296 | C:0.952703                 | T:0.0472973    |
| chr28     | 9108950 | 2 | 278 | C:0.94964                  | A:0.0503597    |
| chr28     | 9108980 | 2 | 310 | AAAAAG:0.929032            | A:0.0709677    |
| chr28     | 9109317 | 2 | 306 | T:0.973856                 | A:0.0261438    |
| chr28     | 9109371 | 2 | 306 | A:0.944444                 | G:0.0555556    |
| chr28     | 9109634 | 2 | 292 | A:0.941781                 | G:0.0582192    |
| chr28     | 9109805 | 2 | 300 | C:0.943333                 | T:0.0566667    |
| chr28     | 9110262 | 2 | 308 | A:0.954545                 | G:0.0454545    |
| chr28     | 9110338 | 2 | 296 | G:0.949324                 | A:0.0506757    |
| chr28     | 9110411 | 2 | 302 | G:0.986755                 | A:0.013245     |
| chr28     | 9110488 | 2 | 304 | T:0.953947                 | C:0.0460526    |
| chr28     | 9110514 | 3 | 300 | TA:0.903333                | T:0.0566667    |
| TAA:0.04  |         |   |     |                            |                |
| chr28     | 9110601 | 2 | 302 | GA:0.993377                | G:0.00662252   |
| chr28     | 9110604 | 2 | 302 | GT:0.993377                | G:0.00662252   |
| chr28     | 9110928 | 2 | 302 | A:0.817881                 | G:0.182119     |
| chr28     | 9111013 | 2 | 306 | G:0.944444                 | A:0.0555556    |
| chr28     | 9111170 | 2 | 310 | A:0.951613                 | C:0.0483871    |
| chr28     | 9111254 | 2 | 300 | G:0.94                     | GT:0.06        |
| chr28     | 9111556 | 2 | 310 | C:0.819355                 | G:0.180645     |
| chr28     | 9111695 | 2 | 296 | A:0.952703                 | G:0.0472973    |
| chr28     | 9112237 | 2 | 308 | G:0.957792                 | A:0.0422078    |
| chr28     | 9113042 | 2 | 302 | G:0.950331                 | A:0.0496689    |
| chr28     | 9113206 | 2 | 298 | C:0.852349                 | G:0.147651     |
| chr28     | 9113447 | 2 | 308 | TTTA:0.970779              | T:0.0292208    |
| chr28     | 9113448 | 2 | 308 | TTA:0.977273               | T:0.0227273    |
| chr28     | 9113458 | 2 | 314 | TTTTA:0.936306             | T:0.0636943    |
| chr28     | 9113486 | 2 | 274 | C:0.941606                 | CAG:0.0583942  |
| chr28     | 9113601 | 2 | 286 | C:0.947552                 | A:0.0524476    |
| chr28     | 9113608 | 2 | 280 | T:0.817857                 | C:0.182143     |

|                  |         |   |     |                                    |                |
|------------------|---------|---|-----|------------------------------------|----------------|
| chr28            | 9113777 | 2 | 296 | TG:0.945946                        | T:0.0540541    |
| chr28            | 9113925 | 2 | 264 | TA:0.931818                        | T:0.0681818    |
| chr28            | 9114091 | 2 | 288 | G:0.8125 C:0.1875                  |                |
| chr28            | 9114192 | 2 | 312 | C:0.955128                         | A:0.0448718    |
| chr28            | 9114394 | 2 | 294 | T:0.816327                         | A:0.183673     |
| chr28            | 9114401 | 2 | 304 | C:0.953947                         | CAA:0.0460526  |
| chr28            | 9114999 | 2 | 296 | C:0.945946                         | T:0.0540541    |
| chr28            | 9115428 | 2 | 302 | C:0.950331                         | T:0.0496689    |
| chr28            | 9115456 | 2 | 312 | A:0.961538                         | G:0.0384615    |
| chr28            | 9115654 | 2 | 314 | A:0.94586                          | G:0.0541401    |
| chr28            | 9115933 | 2 | 312 | G:0.807692                         | GTTGT:0.192308 |
| chr28            | 9116460 | 2 | 312 | C:0.961538                         | T:0.0384615    |
| chr28            | 9117028 | 2 | 308 | T:0.86039                          | A:0.13961      |
| chr28            | 9117210 | 2 | 312 | T:0.86859                          | C:0.13141      |
| chr28            | 9117252 | 2 | 314 | A:0.859873                         | G:0.140127     |
| chr28            | 9117980 | 2 | 314 | A:0.961783                         | T:0.0382166    |
| chr28            | 9117981 | 3 | 314 | AAG:0.93949                        | A:0.0382166    |
| GAG:0.022293     |         |   |     |                                    |                |
| chr28            | 9118004 | 2 | 314 | C:0.961783                         | T:0.0382166    |
| chr28            | 9118072 | 2 | 298 | GAAA:0.946309                      | G:0.0536913    |
| chr28            | 9118145 | 2 | 300 | C:0.946667                         | T:0.0533333    |
| chr28            | 9118226 | 2 | 314 | T:0.955414                         | C:0.044586     |
| chr28            | 9118408 | 2 | 306 | T:0.846405                         | C:0.153595     |
| chr28            | 9118672 | 2 | 300 | T:0.946667                         | A:0.0533333    |
| chr28            | 9118674 | 2 | 300 | C:0.946667                         | A:0.0533333    |
| chr28            | 9118781 | 3 | 292 | CT:0.592466                        | C:0.222603     |
| CTT:0.184932     |         |   |     |                                    |                |
| chr28            | 9118803 | 2 | 298 | TTTTA:0.785235                     | T:0.214765     |
| chr28            | 9119002 | 2 | 300 | G:0.97 T:0.03                      |                |
| chr28            | 9119203 | 2 | 304 | G:0.947368                         | A:0.0526316    |
| chr28            | 9119345 | 3 | 280 | TA:0.653571                        | T:0.189286     |
| TAAA:0.157143    |         |   |     |                                    |                |
| chr28            | 9119362 | 2 | 300 | A:0.95 AT:0.05                     |                |
| chr28            | 9119470 | 2 | 308 | T:0.951299                         | A:0.0487013    |
| chr28            | 9119870 | 3 | 312 | AT:0.737179                        | A:0.108974     |
| ATGTTTT:0.153846 |         |   |     |                                    |                |
| chr28            | 9120006 | 2 | 292 | G:0.94863                          | A:0.0513699    |
| chr28            | 9120038 | 2 | 294 | A:0.812925                         | G:0.187075     |
| chr28            | 9120081 | 2 | 302 | C:0.950331                         | T:0.0496689    |
| chr28            | 9120109 | 2 | 308 | C:0.87013                          | T:0.12987      |
| chr28            | 9120303 | 2 | 306 | C:0.947712                         | T:0.0522876    |
| chr28            | 9120801 | 2 | 300 | C:0.8 T:0.2                        |                |
| chr28            | 9121069 | 2 | 298 | G:0.946309                         | A:0.0536913    |
| chr28            | 9121180 | 2 | 288 | C:0.868056                         | CT:0.131944    |
| chr28            | 9121516 | 2 | 308 | A:0.840909                         | G:0.159091     |
| chr28            | 9122021 | 2 | 320 | AGGACATTTGGGCAGTGATGTTTTT:0.865625 |                |
| A:0.134375       |         |   |     |                                    |                |
| chr28            | 9122067 | 2 | 306 | T:0.944444                         | TA:0.0555556   |
| chr28            | 9122560 | 2 | 298 | C:0.869128                         | T:0.130872     |
| chr28            | 9122818 | 2 | 294 | G:0.959184                         | A:0.0408163    |
| chr28            | 9122925 | 2 | 304 | A:0.957237                         | C:0.0427632    |
| chr28            | 9123875 | 2 | 300 | C:0.946667                         | T:0.0533333    |
| chr28            | 9123928 | 2 | 300 | C:0.953333                         | T:0.0466667    |
| chr28            | 9123957 | 2 | 304 | T:0.802632                         | C:0.197368     |

|       |               |   |     |                   |              |
|-------|---------------|---|-----|-------------------|--------------|
| chr28 | 9124006       | 2 | 314 | CCTCTCTCT:0.93949 | C:           |
|       | 0.0605096     |   |     |                   |              |
| chr28 | 9124042       | 2 | 312 | A:0.951923        | T:0.0480769  |
| chr28 | 9124060       | 2 | 312 | A:0.977564        | C:0.0224359  |
| chr28 | 9124061       | 2 | 312 | C:0.974359        | A:0.025641   |
| chr28 | 9124281       | 2 | 304 | T:0.940789        | C:0.0592105  |
| chr28 | 9124572       | 2 | 294 | T:0.94898         | TC:0.0510204 |
| chr28 | 9124752       | 2 | 300 | T:0.956667        | C:0.0433333  |
| chr28 | 9124828       | 3 | 274 | CT:0.423358       | C:0.171533   |
|       | CTT:0.405109  |   |     |                   |              |
| chr28 | 9124843       | 2 | 300 | T:0.956667        | A:0.0433333  |
| chr28 | 9124899       | 2 | 262 | C:0.965649        | G:0.0343511  |
| chr28 | 9124901       | 2 | 262 | C:0.965649        | G:0.0343511  |
| chr28 | 9124972       | 2 | 294 | G:0.955782        | A:0.0442177  |
| chr28 | 9124982       | 2 | 294 | G:0.955782        | A:0.0442177  |
| chr28 | 9125096       | 2 | 308 | A:0.951299        | G:0.0487013  |
| chr28 | 9126738       | 2 | 302 | T:0.953642        | C:0.0463576  |
| chr28 | 9127083       | 2 | 294 | C:0.955782        | T:0.0442177  |
| chr28 | 9127129       | 2 | 306 | CCTCT:0.970588    | C:0.0294118  |
| chr28 | 9127181       | 2 | 308 | TTAAAA:0.967532   | T:0.0324675  |
| chr28 | 9127226       | 2 | 310 | A:0.948387        | C:0.0516129  |
| chr28 | 9127250       | 2 | 308 | G:0.951299        | GA:0.0487013 |
| chr28 | 9127363       | 2 | 306 | T:0.944444        | A:0.0555556  |
| chr28 | 9127803       | 2 | 308 | T:0.954545        | TA:0.0454545 |
| chr28 | 9127952       | 2 | 306 | A:0.957516        | G:0.0424837  |
| chr28 | 9128086       | 2 | 304 | T:0.878289        | C:0.121711   |
| chr28 | 9128585       | 2 | 294 | G:0.955782        | T:0.0442177  |
| chr28 | 9128938       | 2 | 292 | T:0.945205        | C:0.0547945  |
| chr28 | 9129276       | 2 | 302 | C:0.943709        | T:0.0562914  |
| chr28 | 9129297       | 2 | 300 | C:0.94 A:0.06     |              |
| chr28 | 9129460       | 2 | 298 | A:0.95302         | G:0.0469799  |
| chr28 | 9129912       | 2 | 294 | T:0.945578        | C:0.0544218  |
| chr28 | 9129963       | 2 | 298 | C:0.795302        | T:0.204698   |
| chr28 | 9129964       | 2 | 298 | A:0.795302        | G:0.204698   |
| chr28 | 9130261       | 2 | 294 | T:0.959184        | C:0.0408163  |
| chr28 | 9130795       | 2 | 302 | C:0.857616        | T:0.142384   |
| chr28 | 9130813       | 2 | 302 | T:0.86755         | C:0.13245    |
| chr28 | 9130936       | 2 | 312 | T:0.945513        | C:0.0544872  |
| chr28 | 9130939       | 2 | 312 | A:0.945513        | G:0.0544872  |
| chr28 | 9131645       | 2 | 170 | G:0.694118        | A:0.305882   |
| chr28 | 9132326       | 2 | 252 | T:0.785714        | C:0.214286   |
| chr28 | 9132540       | 2 | 302 | T:0.880795        | C:0.119205   |
| chr28 | 9134968       | 2 | 290 | C:0.955172        | T:0.0448276  |
| chr28 | 9135012       | 2 | 218 | TA:0.605505       | T:0.394495   |
| chr28 | 9135153       | 2 | 298 | C:0.936242        | T:0.0637584  |
| chr28 | 9135492       | 3 | 282 | TA:0.535461       | T:0.301418   |
|       | TAAA:0.163121 |   |     |                   |              |
| chr28 | 9135625       | 2 | 308 | T:0.961039        | A:0.038961   |
| chr28 | 9136723       | 2 | 304 | CAT:0.963816      | C:0.0361842  |
| chr28 | 9136768       | 2 | 310 | T:0.945161        | G:0.0548387  |
| chr28 | 9136846       | 2 | 310 | A:0.951613        | T:0.0483871  |
| chr28 | 9136848       | 2 | 310 | G:0.951613        | T:0.0483871  |
| chr28 | 9136969       | 2 | 310 | G:0.948387        | A:0.0516129  |
| chr28 | 9137075       | 2 | 282 | CT:0.787234       | C:0.212766   |

|                                                   |         |   |     |                                     |                  |
|---------------------------------------------------|---------|---|-----|-------------------------------------|------------------|
| chr28                                             | 9137096 | 2 | 306 | TTTTA:0.846405                      | T:0.153595       |
| chr28                                             | 9137144 | 2 | 304 | T:0.953947                          | C:0.0460526      |
| chr28                                             | 9137614 | 2 | 308 | A:0.957792                          | C:0.0422078      |
| chr28                                             | 9138170 | 3 | 314 | C:0.853503                          | CCTCT:0.101911   |
| CCTCTCTCTCTCTCT:0.044586                          |         |   |     |                                     |                  |
| chr28                                             | 9138203 | 2 | 298 | GAATA:0.949664                      | G:0.0503356      |
| chr28                                             | 9138235 | 2 | 292 | T:0.267123                          | TA:0.732877      |
| chr28                                             | 9139044 | 2 | 304 | A:0.960526                          | G:0.0394737      |
| chr28                                             | 9139062 | 2 | 306 | C:0.813725                          | CTTCT:0.186275   |
| chr28                                             | 9139324 | 2 | 300 | C:0.956667                          | CACAGAGAG:       |
| 0.0433333                                         |         |   |     |                                     |                  |
| chr28                                             | 9139613 | 2 | 290 | G:0.97931                           | C:0.0206897      |
| chr28                                             | 9139644 | 2 | 300 | G:0.97                              | T:0.03           |
| chr28                                             | 9139804 | 2 | 290 | G:0.855172                          | T:0.144828       |
| chr28                                             | 9139909 | 2 | 304 | C:0.957237                          | G:0.0427632      |
| chr28                                             | 9140077 | 2 | 302 | A:0.983444                          | T:0.0165563      |
| chr28                                             | 9140530 | 2 | 312 | G:0.846154                          | C:0.153846       |
| chr28                                             | 9140720 | 2 | 308 | G:0.948052                          | A:0.0519481      |
| chr28                                             | 9140804 | 2 | 306 | C:0.944444                          | CTG:0.0555556    |
| chr28                                             | 9141197 | 2 | 314 | T:0.958599                          | TA:0.0414013     |
| chr28                                             | 9141271 | 2 | 310 | A:0.948387                          | T:0.0516129      |
| chr28                                             | 9141396 | 2 | 296 | G:0.942568                          | C:0.0574324      |
| chr28                                             | 9142392 | 2 | 304 | G:0.950658                          | A:0.0493421      |
| chr28                                             | 9142600 | 2 | 302 | A:0.94702                           | T:0.0529801      |
| chr28                                             | 9142635 | 2 | 296 | A:0.787162                          | AT:0.212838      |
| chr28                                             | 9142668 | 2 | 300 | TAGAC:0.95                          | T:0.05           |
| chr28                                             | 9142680 | 3 | 318 | AAGAGAGAG:0.672956                  | A:               |
| 0.0754717 AAGAGAGAGAG:0.251572                    |         |   |     |                                     |                  |
| chr28                                             | 9142841 | 3 | 248 | TCC:0.745968                        | T:0.197581       |
| TC:0.0564516                                      |         |   |     |                                     |                  |
| chr28                                             | 9142881 | 2 | 278 | T:0.935252                          | TA:0.0647482     |
| chr28                                             | 9143006 | 2 | 298 | C:0.822148                          | T:0.177852       |
| chr28                                             | 9143377 | 3 | 286 | AT:0.678322                         | A:0.206294       |
| ATT:0.115385                                      |         |   |     |                                     |                  |
| chr28                                             | 9143426 | 2 | 300 | CAGAGAGAG:0.843333                  | C:               |
| 0.156667                                          |         |   |     |                                     |                  |
| chr28                                             | 9143525 | 2 | 298 | A:0.822148                          | G:0.177852       |
| chr28                                             | 9143900 | 2 | 306 | TA:0.895425                         | T:0.104575       |
| chr28                                             | 9144440 | 2 | 302 | G:0.804636                          | T:0.195364       |
| chr28                                             | 9144446 | 2 | 306 | G:0.95098                           | A:0.0490196      |
| chr28                                             | 9144686 | 2 | 302 | A:0.956954                          | T:0.0430464      |
| chr28                                             | 9145028 | 2 | 294 | TGAAATATCTGGAAAAAAAAAAAAAAAAA:      |                  |
| 0.853741 T:0.146259                               |         |   |     |                                     |                  |
| chr28                                             | 9145032 | 2 | 294 | ATATC:0.962585                      | A:0.037415       |
| chr28                                             | 9145038 | 2 | 294 | GGAAAAAAAAAAAAAAAAAAGAAATA:0.962585 |                  |
| G:0.037415                                        |         |   |     |                                     |                  |
| chr28                                             | 9145148 | 2 | 270 | CT:0.618519                         | C:0.381481       |
| chr28                                             | 9145161 | 2 | 296 | T:0.780405                          | A:0.219595       |
| chr28                                             | 9145164 | 4 | 314 | GATTTATTT:0.770701                  | G:               |
| 0.0987261 GATTT:0.0382166 GATTTATTTATTT:0.0923567 |         |   |     |                                     |                  |
| chr28                                             | 9145226 | 2 | 304 | T:0.950658                          | TGAGA:0.0493421  |
| chr28                                             | 9145643 | 2 | 316 | C:0.946203                          | CAAGAT:0.0537975 |
| chr28                                             | 9145790 | 2 | 312 | CTCT:0.945513                       | C:0.0544872      |
| chr28                                             | 9145810 | 2 | 312 | T:0.945513                          | A:0.0544872      |

|                                    |         |   |     |                  |                |
|------------------------------------|---------|---|-----|------------------|----------------|
| chr28                              | 9145957 | 2 | 312 | CACG:0.86859     | C:0.13141      |
| chr28                              | 9146538 | 2 | 306 | G:0.856209       | A:0.143791     |
| chr28                              | 9146594 | 2 | 306 | ATC:0.872549     | A:0.127451     |
| chr28                              | 9146977 | 2 | 282 | T:0.812057       | A:0.187943     |
| chr28                              | 9147023 | 2 | 282 | G:0.932624       | T:0.0673759    |
| chr28                              | 9147135 | 2 | 298 | TC:0.66443       | T:0.33557      |
| chr28                              | 9147162 | 2 | 296 | T:0.797297       | C:0.202703     |
| chr28                              | 9147164 | 2 | 296 | T:0.797297       | C:0.202703     |
| chr28                              | 9147406 | 2 | 216 | A:0.939815       | G:0.0601852    |
| chr28                              | 9149465 | 2 | 250 | TA:0.512 T:0.488 |                |
| chr28                              | 9150836 | 2 | 290 | GT:0.775862      | G:0.224138     |
| chr28                              | 9153248 | 2 | 304 | C:0.967105       | T:0.0328947    |
| chr28                              | 9157090 | 2 | 296 | GT:0.733108      | G:0.266892     |
| chr28                              | 9157133 | 2 | 300 | CAGAG:0.923333   | C:0.0766667    |
| chr28                              | 9158152 | 2 | 280 | AT:0.946429      | A:0.0535714    |
| chr28                              | 9158201 | 2 | 280 | GGA:0.839286     | G:0.160714     |
| chr28                              | 9158997 | 2 | 296 | TA:0.959459      | T:0.0405405    |
| chr28                              | 9159272 | 3 | 302 | AAG:0.850993     | A:0.115894     |
| AAGAGAG:0.0331126                  |         |   |     |                  |                |
| chr28                              | 9160165 | 2 | 288 | T:0.934028       | TA:0.0659722   |
| chr28                              | 9160327 | 2 | 270 | CTG:0.237037     | C:0.762963     |
| chr28                              | 9160429 | 2 | 306 | C:0.781046       | T:0.218954     |
| chr28                              | 9160757 | 2 | 312 | AC:0.990385      | A:0.00961538   |
| chr28                              | 9161374 | 2 | 306 | T:0.973856       | A:0.0261438    |
| chr28                              | 9161866 | 2 | 312 | C:0.958333       | T:0.0416667    |
| chr28                              | 9162302 | 2 | 302 | GGA:0.880795     | G:0.119205     |
| chr28                              | 9163197 | 2 | 296 | GA:0.152027      | G:0.847973     |
| chr28                              | 9163247 | 2 | 298 | A:0.765101       | G:0.234899     |
| chr28                              | 9164020 | 2 | 318 | C:0.974843       |                |
| CTTTGTTCTCTTTTTTTTTTTTTT:0.0251572 |         |   |     |                  |                |
| chr28                              | 9164559 | 2 | 306 | G:0.970588       | GT:0.0294118   |
| chr28                              | 9164798 | 2 | 300 | TA:0.696667      | T:0.303333     |
| chr28                              | 9165080 | 3 | 306 | TA:0.777778      | T:0.199346     |
| AA:0.0228758                       |         |   |     |                  |                |
| chr28                              | 9165804 | 2 | 302 | T:0.778146       | C:0.221854     |
| chr28                              | 9166894 | 2 | 276 | C:0.887681       | CT:0.112319    |
| chr28                              | 9167364 | 2 | 284 | C:0.323944       | CT:0.676056    |
| chr28                              | 9167454 | 2 | 292 | C:0.982877       | T:0.0171233    |
| chr28                              | 9168441 | 2 | 256 | CAG:0.53125      | C:0.46875      |
| chr28                              | 9168549 | 2 | 282 | A:0.496454       | G:0.503546     |
| chr28                              | 9169426 | 2 | 312 | A:0.958333       | G:0.0416667    |
| chr28                              | 9170031 | 2 | 302 | G:0.801325       | A:0.198675     |
| chr28                              | 9170724 | 2 | 282 | C:0.138298       | CAGAG:0.861702 |
| chr28                              | 9171159 | 2 | 310 | C:0.948387       | T:0.0516129    |
| chr28                              | 9175560 | 2 | 306 | T:0.964052       | C:0.0359477    |
| chr28                              | 9175795 | 2 | 280 | CT:0.828571      | C:0.171429     |
| chr28                              | 9178631 | 2 | 302 | T:0.990066       | C:0.00993377   |
| chr28                              | 9180681 | 2 | 274 | A:0.934307       | G:0.0656934    |
| chr28                              | 9180806 | 2 | 302 | C:0.953642       | T:0.0463576    |
| chr28                              | 9180948 | 2 | 288 | T:0.972222       | G:0.0277778    |
| chr28                              | 9181107 | 2 | 312 | C:0.980769       | T:0.0192308    |
| chr28                              | 9181265 | 2 | 296 | C:0.969595       | T:0.0304054    |
| chr28                              | 9184306 | 3 | 298 | CAG:0.644295     | C:0.151007     |
| CAGAG:0.204698                     |         |   |     |                  |                |

|                |                |   |     |                           |                |
|----------------|----------------|---|-----|---------------------------|----------------|
| chr28          | 9187030        | 2 | 290 | CAAAT:0.458621            | C:0.541379     |
| chr28          | 9187804        | 2 | 290 | G:0.824138                | A:0.175862     |
| chr28          | 9188964        | 2 | 306 | T:0.944444                | C:0.0555556    |
| chr28          | 9190252        | 2 | 288 | CT:0.927083               | C:0.0729167    |
| chr28          | 9190810        | 2 | 298 | G:0.97651                 | A:0.0234899    |
| chr28          | 9191746        | 2 | 288 | G:0 T:1                   |                |
| chr28          | 9194302        | 2 | 308 | C:0.974026                | T:0.025974     |
| chr28          | 9195381        | 2 | 306 | T:0.990196                | G:0.00980392   |
| chr28          | 9195814        | 2 | 302 | G:0.976821                | A:0.0231788    |
| chr28          | 9197247        | 2 | 308 | G:0.993506                | A:0.00649351   |
| chr28          | 9200444        | 2 | 316 | G:0.901899                | A:0.0981013    |
| chr28          | 9200919        | 2 | 268 | CT:0.761194               | C:0.238806     |
| chr28          | 9202338        | 2 | 306 | C:0.781046                | T:0.218954     |
| chr28          | 9202393        | 2 | 242 | AT:0.652893               | A:0.347107     |
| chr28          | 9203008        | 4 | 310 | CTTCTTTCT:0.358065        | C:             |
| 0.167742       | CTTCT:0.167742 |   |     | CTTCTTTCTTTCT:0.306452    |                |
| chr28          | 9203378        | 2 | 300 | GT:0.71 G:0.29            |                |
| chr28          | 9204202        | 2 | 292 | GAC:0.821918              | G:0.178082     |
| chr28          | 9205805        | 2 | 312 | CTTCTTCTTCTTCTCT:0.887821 | C:             |
| 0.112179       |                |   |     |                           |                |
| chr28          | 9205814        | 2 | 308 | CTTCTCT:0.948052          | C:0.0519481    |
| chr28          | 9208416        | 2 | 302 | T:0.897351                | A:0.102649     |
| chr28          | 9208559        | 2 | 278 | C:0.971223                | T:0.028777     |
| chr28          | 9208833        | 2 | 302 | C:0.953642                | T:0.0463576    |
| chr28          | 9210336        | 2 | 302 | C:0.986755                | T:0.013245     |
| chr28          | 9211793        | 2 | 266 | AC:0 A:1                  |                |
| chr28          | 9214201        | 2 | 296 | G:0.959459                | A:0.0405405    |
| chr28          | 9218725        | 2 | 306 | C:0.957516                | T:0.0424837    |
| chr28          | 9220104        | 2 | 290 | A:0.731034                | AATTC:0.268966 |
| chr28          | 9221330        | 2 | 262 | T:0.351145                | C:0.648855     |
| chr28          | 9222795        | 2 | 304 | C:0.947368                | T:0.0526316    |
| chr28          | 9224068        | 2 | 308 | G:0.152597                | A:0.847403     |
| chr28          | 9224369        | 2 | 306 | A:0.859477                | G:0.140523     |
| chr28          | 9225820        | 2 | 288 | C:0.878472                | G:0.121528     |
| chr28          | 9225982        | 2 | 296 | T:0.952703                | G:0.0472973    |
| chr28          | 9226256        | 2 | 306 | TCAA:0.764706             | T:0.235294     |
| chr28          | 9226379        | 2 | 296 | G:0.952703                | A:0.0472973    |
| chr28          | 9226462        | 2 | 288 | C:0.930556                | T:0.0694444    |
| chr28          | 9229209        | 2 | 308 | C:0.983766                | T:0.0162338    |
| chr28          | 9231342        | 3 | 290 | C:0.544828                | CT:0.306897    |
| CTT:0.148276   |                |   |     |                           |                |
| chr28          | 9234080        | 2 | 286 | C:0.93007                 | T:0.0699301    |
| chr28          | 9235371        | 2 | 290 | G:0.786207                | A:0.213793     |
| chr28          | 9235627        | 2 | 306 | G:0.96732                 | C:0.0326797    |
| chr28          | 9236536        | 3 | 280 | T:0.228571                | TTG:0.435714   |
| TTGTG:0.335714 |                |   |     |                           |                |
| chr28          | 9241046        | 2 | 264 | T:0.829545                | TAC:0.170455   |
| chr28          | 9241915        | 2 | 308 | G:0.961039                | T:0.038961     |
| chr28          | 9242810        | 2 | 310 | C:0.980645                | T:0.0193548    |
| chr28          | 9245246        | 2 | 298 | G:0.895973                | A:0.104027     |
| chr28          | 9245562        | 2 | 314 | C:0.805732                | CAG:0.194268   |
| chr28          | 9245594        | 2 | 318 | GAAACATAGGC:0.915094      | G:             |
| 0.0849057      |                |   |     |                           |                |
| chr28          | 9245609        | 2 | 318 | G:0.915094                | A:0.0849057    |

|                                                |         |   |     |                       |                 |
|------------------------------------------------|---------|---|-----|-----------------------|-----------------|
| chr28                                          | 9246068 | 3 | 252 | CT:0.563492           | C:0.218254      |
| CTT:0.218254                                   |         |   |     |                       |                 |
| chr28                                          | 9249971 | 2 | 262 | GA:0.816794           | G:0.183206      |
| chr28                                          | 9252355 | 2 | 290 | G:0.803448            | GC:0.196552     |
| chr28                                          | 9255857 | 2 | 296 | A:0.905405            | G:0.0945946     |
| chr28                                          | 9256832 | 2 | 294 | T:0.972789            | C:0.0272109     |
| chr28                                          | 9258279 | 2 | 290 | T:0.962069            | TTTTTC:0.037931 |
| chr28                                          | 9260451 | 2 | 296 | TA:0.841216           | T:0.158784      |
| chr28                                          | 9262984 | 2 | 260 | C:0.984615            | A:0.0153846     |
| chr28                                          | 9263081 | 2 | 296 | T:0.956081            | A:0.0439189     |
| chr28                                          | 9263695 | 2 | 310 | C:0.0709677           | A:0.929032      |
| chr28                                          | 9266238 | 4 | 314 | TAAATAAAAATA:0.401274 | T:              |
| 0.343949 TAAATA:0.0923567 TAAATAAAAATA:0.16242 |         |   |     |                       |                 |
| chr28                                          | 9266559 | 2 | 310 | C:0.941935            | T:0.0580645     |
| chr28                                          | 9268562 | 3 | 286 | T:0.814685            | TCA:0.104895    |
| TCACA:0.0804196                                |         |   |     |                       |                 |
| chr28                                          | 9270413 | 2 | 310 | T:0.883871            | TA:0.116129     |
| chr28                                          | 9270532 | 2 | 304 | C:0.9375              | G:0.0625        |
| chr28                                          | 9271166 | 3 | 314 | AAG:0.853503          | A:0.130573      |
| AAGAGAG:0.0159236                              |         |   |     |                       |                 |
| chr28                                          | 9274164 | 2 | 308 | A:0.938312            | T:0.0616883     |
| chr28                                          | 9274623 | 2 | 290 | G:0.982759            | A:0.0172414     |
| chr28                                          | 9274782 | 3 | 302 | TTTTA:0.678808        | T:0.0761589     |
| TTTTATTTA:0.245033                             |         |   |     |                       |                 |
| chr28                                          | 9276305 | 2 | 298 | G:0.983221            | A:0.0167785     |
| chr28                                          | 9279792 | 3 | 306 | TTCTCTCTCTC:0.575163  | T:              |
| 0.19281 TTCTCTC:0.232026                       |         |   |     |                       |                 |
| chr28                                          | 9279868 | 2 | 288 | A:0.9375              | T:0.0625        |
| chr28                                          | 9279890 | 2 | 284 | T:0.292254            | TA:0.707746     |
| chr28                                          | 9282265 | 2 | 300 | C:0.993333            | T:0.00666667    |
| chr28                                          | 9286422 | 2 | 300 | A:0.913333            | G:0.0866667     |
| chr28                                          | 9289479 | 2 | 298 | G:0                   | GT:1            |
| chr28                                          | 9289501 | 2 | 298 | AG:0                  | A:1             |
| chr28                                          | 9289508 | 2 | 298 | C:0                   | CA:1            |
| chr28                                          | 9289522 | 2 | 292 | CT:0                  | C:1             |
| chr28                                          | 9289527 | 2 | 292 | C:0                   | CA:1            |
| chr28                                          | 9289532 | 2 | 292 | AT:0                  | A:1             |
| chr28                                          | 9289540 | 2 | 294 | A:0                   | AC:1            |
| chr28                                          | 9289550 | 2 | 294 | G:0                   | C:1             |
| chr28                                          | 9289551 | 2 | 294 | C:0                   | T:1             |
| chr28                                          | 9289563 | 2 | 286 | A:0.00699301          | AT:0.993007     |
| chr28                                          | 9289582 | 2 | 290 | T:0.0137931           | TTG:0.986207    |
| chr28                                          | 9289586 | 2 | 290 | A:0.0137931           | AG:0.986207     |
| chr28                                          | 9289594 | 2 | 290 | A:0.00689655          | AT:0.993103     |
| chr28                                          | 9289602 | 2 | 284 | C:0.00704225          | CT:0.992958     |
| chr28                                          | 9289611 | 2 | 284 | C:0                   | CT:1            |
| chr28                                          | 9289613 | 2 | 284 | A:0                   | T:1             |
| chr28                                          | 9289628 | 2 | 282 | T:0                   | C:1             |
| chr28                                          | 9289678 | 2 | 294 | G:0                   | GA:1            |
| chr28                                          | 9289765 | 3 | 290 | GT:0.686207           | G:0.162069      |
| GTT:0.151724                                   |         |   |     |                       |                 |
| chr28                                          | 9291028 | 2 | 282 | G:0.85461             | GA:0.14539      |
| chr28                                          | 9292480 | 2 | 306 | A:0.98366             | G:0.0163399     |
| chr28                                          | 9292702 | 2 | 292 | A:0.883562            | AT:0.116438     |



|                                                 |         |   |     |                      |                 |
|-------------------------------------------------|---------|---|-----|----------------------|-----------------|
| chr28                                           | 9293543 | 2 | 304 | A:0.907895           | T:0.0921053     |
| chr28                                           | 9294590 | 2 | 284 | CT:0.785211          | C:0.214789      |
| chr28                                           | 9295280 | 2 | 292 | C:0.952055           | CTGTG:0.0479452 |
| chr28                                           | 9296459 | 2 | 308 | C:0.305195           | A:0.694805      |
| chr28                                           | 9297124 | 2 | 308 | TG:0 T:1             |                 |
| chr28                                           | 9297705 | 2 | 288 | CT:0.763889          | C:0.236111      |
| chr28                                           | 9297733 | 2 | 286 | T:0.79021            | A:0.20979       |
| chr28                                           | 9297746 | 2 | 280 | T:0.882143           | G:0.117857      |
| chr28                                           | 9299280 | 2 | 246 | T:0.841463           | TA:0.158537     |
| chr28                                           | 9302028 | 2 | 294 | G:0.969388           | A:0.0306122     |
| chr28                                           | 9303306 | 2 | 308 | C:0.967532           | T:0.0324675     |
| chr28                                           | 9307062 | 3 | 264 | TA:0.522727          | T:0.223485      |
| TAA:0.253788                                    |         |   |     |                      |                 |
| chr28                                           | 9307815 | 2 | 298 | C:0.922819           | T:0.0771812     |
| chr28                                           | 9310023 | 3 | 304 | TA:0.832237          | T:0.121711      |
| TAA:0.0460526                                   |         |   |     |                      |                 |
| chr28                                           | 9310572 | 2 | 312 | G:0.948718           | A:0.0512821     |
| chr28                                           | 9313118 | 2 | 304 | C:0.898026           | T:0.101974      |
| chr28                                           | 9313791 | 2 | 276 | TA:0.916667          | T:0.0833333     |
| chr28                                           | 9314189 | 2 | 282 | A:0.960993           | T:0.0390071     |
| chr28                                           | 9314438 | 2 | 246 | CATATATATAT:0.422764 | C:              |
| 0.577236                                        |         |   |     |                      |                 |
| chr28                                           | 9315188 | 2 | 300 | AC:0.93 A:0.07       |                 |
| chr28                                           | 9315208 | 2 | 302 | A:0.996689           | G:0.00331126    |
| chr28                                           | 9318528 | 2 | 208 | TA:0.711538          | T:0.288462      |
| chr28                                           | 9320292 | 2 | 296 | G:0.986486           | A:0.0135135     |
| chr28                                           | 9320305 | 2 | 288 | TG:0.913194          | T:0.0868056     |
| chr28                                           | 9320833 | 2 | 258 | G:0.965116           | GCA:0.0348837   |
| chr28                                           | 9322001 | 2 | 300 | A:0.983333           | G:0.0166667     |
| chr28                                           | 9323951 | 2 | 298 | G:0.11745            | A:0.88255       |
| chr28                                           | 9325691 | 2 | 312 | A:0.996795           | G:0.00320513    |
| chr28                                           | 9326224 | 2 | 304 | C:0.865132           | T:0.134868      |
| chr28                                           | 9330049 | 2 | 294 | CCT:0.962585         | C:0.037415      |
| chr28                                           | 9330093 | 2 | 298 | TA:0.761745          | T:0.238255      |
| chr28                                           | 9338162 | 2 | 300 | CT:0.69 C:0.31       |                 |
| chr28                                           | 9338671 | 2 | 304 | T:0.875 C:0.125      |                 |
| chr28                                           | 9339342 | 2 | 292 | T:0.25 C:0.75        |                 |
| chr28                                           | 9340687 | 2 | 310 | A:0.932258           | C:0.0677419     |
| chr28                                           | 9342346 | 2 | 306 | CAGAG:0.993464       | C:0.00653595    |
| chr28                                           | 9342381 | 2 | 302 | G:0.857616           | A:0.142384      |
| chr28                                           | 9344449 | 2 | 296 | T:0.871622           | G:0.128378      |
| chr28                                           | 9346223 | 2 | 294 | C:0.97619            | CAATA:0.0238095 |
| chr28                                           | 9346437 | 2 | 302 | GA:0.950331          | G:0.0496689     |
| chr28                                           | 9347895 | 3 | 300 | T:0.243333           | TTTTA:0.566667  |
| TTTTATTA:0.19                                   |         |   |     |                      |                 |
| chr28                                           | 9349792 | 2 | 310 | T:0.990323           | C:0.00967742    |
| chr28                                           | 9350405 | 2 | 302 | A:0.960265           | G:0.0397351     |
| chr28                                           | 9351340 | 4 | 308 | TATAAATAA:0.282468   | T:              |
| 0.327922 TATAA:0.334416 TATAAATAAATAA:0.0551948 |         |   |     |                      |                 |
| chr28                                           | 9352037 | 2 | 304 | G:0.973684           | C:0.0263158     |
| chr28                                           | 9355014 | 2 | 284 | CCT:0.922535         | C:0.0774648     |
| chr28                                           | 9356156 | 2 | 266 | TA:0.706767          | T:0.293233      |
| chr28                                           | 9356483 | 2 | 298 | CT:0.889262          | C:0.110738      |
| chr28                                           | 9357139 | 3 | 278 | AT:0.798561          | A:0.140288      |

ATT:0.0611511

|       |         |   |     |                       |               |
|-------|---------|---|-----|-----------------------|---------------|
| chr28 | 9357371 | 2 | 310 | C:0                   | A:1           |
| chr28 | 9357778 | 2 | 300 | T:0.993333            | TA:0.00666667 |
| chr28 | 9359170 | 2 | 312 | A:0.961538            | T:0.0384615   |
| chr28 | 9359227 | 2 | 314 | GGCAGAGGGAGAA:0.93949 | G:            |

0.0605096

|       |         |   |     |                    |              |
|-------|---------|---|-----|--------------------|--------------|
| chr28 | 9359764 | 2 | 276 | TA:0.876812        | T:0.123188   |
| chr28 | 9360813 | 2 | 308 | C:0.967532         | T:0.0324675  |
| chr28 | 9361289 | 2 | 294 | T:0.142857         | C:0.857143   |
| chr28 | 9361760 | 2 | 294 | CTG:0.931973       | C:0.0680272  |
| chr28 | 9361762 | 2 | 296 | G:0.847973         | C:0.152027   |
| chr28 | 9362169 | 2 | 310 | G:0.958065         | A:0.0419355  |
| chr28 | 9363389 | 2 | 314 | T:0.990446         | G:0.00955414 |
| chr28 | 9363703 | 2 | 312 | AAAAGAAAG:0.951923 | A:           |

0.0480769

|       |         |   |     |                        |    |
|-------|---------|---|-----|------------------------|----|
| chr28 | 9363721 | 3 | 316 | AAGAAAGAAAAAG:0.775316 | A: |
|-------|---------|---|-----|------------------------|----|

0.056962 AAAAGAAAAAG:0.167722

|       |         |   |     |                             |              |
|-------|---------|---|-----|-----------------------------|--------------|
| chr28 | 9363727 | 2 | 316 | GAA:0.927215                | G:0.0727848  |
| chr28 | 9363729 | 2 | 320 | A:0.765625                  | AAG:0.234375 |
| chr28 | 9364175 | 2 | 302 | T:0.857616                  | C:0.142384   |
| chr28 | 9364724 | 2 | 300 | G:0.98                      | A:0.02       |
| chr28 | 9365482 | 2 | 312 | CAA:0.961538                | C:0.0384615  |
| chr28 | 9365955 | 2 | 302 | C:0                         | T:1          |
| chr28 | 9366573 | 2 | 304 | T:0.967105                  | A:0.0328947  |
| chr28 | 9367828 | 2 | 302 | A:0                         | T:1          |
| chr28 | 9367875 | 2 | 294 | TA:0.962585                 | T:0.037415   |
| chr28 | 9367881 | 2 | 294 | G:0.962585                  | C:0.037415   |
| chr28 | 9368763 | 2 | 220 | TA:0.727273                 | T:0.272727   |
| chr28 | 9370512 | 2 | 296 | A:0.75                      | G:0.25       |
| chr28 | 9371129 | 2 | 186 | G:0.193548                  | C:0.806452   |
| chr28 | 9371139 | 2 | 184 | TCCGCGCCGCCGCGCCGC:0.266304 |              |

T:0.733696

|       |         |   |     |              |                 |
|-------|---------|---|-----|--------------|-----------------|
| chr28 | 9371311 | 2 | 226 | C:0.362832   | G:0.637168      |
| chr28 | 9371383 | 2 | 250 | G:0.148      | T:0.852         |
| chr28 | 9371461 | 2 | 250 | C:0.8        | G:0.2           |
| chr28 | 9372170 | 2 | 304 | A:0.940789   | G:0.0592105     |
| chr28 | 9372185 | 2 | 304 | A:0.940789   | G:0.0592105     |
| chr28 | 9372781 | 2 | 270 | CT:0.62963   | C:0.37037       |
| chr28 | 9374018 | 2 | 306 | G:0.892157   | C:0.107843      |
| chr28 | 9374197 | 2 | 292 | T:0.941781   | C:0.0582192     |
| chr28 | 9374225 | 2 | 290 | T:0.941379   | TTC:0.0586207   |
| chr28 | 9374408 | 2 | 296 | C:0.922297   | T:0.0777027     |
| chr28 | 9375292 | 2 | 304 | A:0.0723684  | C:0.927632      |
| chr28 | 9375559 | 2 | 302 | C:0.913907   | CCTCT:0.0860927 |
| chr28 | 9376063 | 2 | 308 | A:0.974026   | T:0.025974      |
| chr28 | 9376620 | 2 | 300 | A:0.93       | T:0.07          |
| chr28 | 9376724 | 2 | 304 | A:0.9375     | G:0.0625        |
| chr28 | 9377246 | 2 | 302 | TCA:0.950331 | T:0.0496689     |
| chr28 | 9377362 | 2 | 304 | T:0.9375     | A:0.0625        |
| chr28 | 9377406 | 2 | 304 | G:0.9375     | A:0.0625        |
| chr28 | 9378066 | 2 | 284 | TA:0.855634  | T:0.144366      |
| chr28 | 9378352 | 2 | 310 | T:0.948387   | C:0.0516129     |
| chr28 | 9379155 | 2 | 294 | CT:0.853741  | C:0.146259      |
| chr28 | 9379714 | 2 | 308 | AT:0.607143  | A:0.392857      |

|       |                |   |     |                            |               |
|-------|----------------|---|-----|----------------------------|---------------|
| chr28 | 9379904        | 2 | 296 | G:0.932432                 | A:0.0675676   |
| chr28 | 9379915        | 2 | 306 | G:0.98366                  | A:0.0163399   |
| chr28 | 9381902        | 2 | 312 | G:0.955128                 | A:0.0448718   |
| chr28 | 9382377        | 2 | 286 | C:0.961538                 | T:0.0384615   |
| chr28 | 9382570        | 2 | 292 | T:0.955479                 | C:0.0445205   |
| chr28 | 9382869        | 2 | 302 | A:0.950331                 | G:0.0496689   |
| chr28 | 9383106        | 2 | 298 | T:0.963087                 | C:0.0369128   |
| chr28 | 9383420        | 2 | 308 | G:0.954545                 | T:0.0454545   |
| chr28 | 9383516        | 2 | 304 | G:0.963816                 | A:0.0361842   |
| chr28 | 9383681        | 2 | 308 | G:0.909091                 | A:0.0909091   |
| chr28 | 9384144        | 2 | 304 | G:0.934211                 | T:0.0657895   |
| chr28 | 9384153        | 2 | 304 | T:0.934211                 | C:0.0657895   |
| chr28 | 9384469        | 2 | 306 | C:0.957516                 | CT:0.0424837  |
| chr28 | 9384854        | 2 | 302 | C:0.94702                  | G:0.0529801   |
| chr28 | 9384896        | 2 | 296 | CT:0.949324                | C:0.0506757   |
| chr28 | 9385165        | 2 | 294 | A:0.972789                 | G:0.0272109   |
| chr28 | 9385324        | 2 | 306 | TG:0.95098                 | T:0.0490196   |
| chr28 | 9385492        | 2 | 302 | G:0.933775                 | GT:0.0662252  |
| chr28 | 9385817        | 2 | 312 | TAA:0.932692               | T:0.0673077   |
| chr28 | 9385948        | 2 | 294 | A:0.945578                 | G:0.0544218   |
| chr28 | 9386281        | 2 | 304 | AGCT:0.950658              | A:0.0493421   |
| chr28 | 9386287        | 2 | 304 | T:0.950658                 | A:0.0493421   |
| chr28 | 9387287        | 2 | 296 | C:0.952703                 | T:0.0472973   |
| chr28 | 9387331        | 2 | 300 | C:0.95 T:0.05              |               |
| chr28 | 9387708        | 2 | 302 | A:0.953642                 | T:0.0463576   |
| chr28 | 9387720        | 2 | 302 | A:0.953642                 | T:0.0463576   |
| chr28 | 9387722        | 2 | 302 | T:0.953642                 | TC:0.0463576  |
| chr28 | 9388020        | 2 | 306 | T:0.941176                 | A:0.0588235   |
| chr28 | 9388110        | 2 | 296 | C:0.952703                 | T:0.0472973   |
| chr28 | 9388356        | 2 | 284 | C:0.957746                 | A:0.0422535   |
| chr28 | 9388423        | 2 | 302 | T:0.970199                 | A:0.0298013   |
| chr28 | 9388498        | 2 | 292 | AT:0.94863                 | A:0.0513699   |
| chr28 | 9388688        | 2 | 298 | G:0.966443                 | A:0.033557    |
| chr28 | 9388702        | 2 | 298 | A:0.966443                 | G:0.033557    |
| chr28 | 9388808        | 2 | 314 | CTTCTG:0.961783            | C:0.0382166   |
| chr28 | 9388923        | 2 | 302 | G:0.996689                 | A:0.00331126  |
| chr28 | 9389027        | 2 | 298 | C:0.946309                 | T:0.0536913   |
| chr28 | 9389031        | 2 | 298 | A:0.946309                 | G:0.0536913   |
| chr28 | 9389127        | 2 | 316 | T:0.990506                 | G:0.00949367  |
| chr28 | 9389456        | 2 | 300 | TA:0.903333                | T:0.0966667   |
| chr28 | 9389930        | 2 | 310 | G:0.958065                 | A:0.0419355   |
| chr28 | 9390113        | 2 | 290 | C:0.968966                 | G:0.0310345   |
| chr28 | 9390141        | 2 | 318 | GTCTCTGCCTCTCTCTC:0.738994 |               |
|       | G:0.261006     |   |     |                            |               |
| chr28 | 9390148        | 2 | 316 | C:0.952532                 | CCT:0.0474684 |
| chr28 | 9390206        | 2 | 292 | AT:0.952055                | A:0.0479452   |
| chr28 | 9390620        | 3 | 292 | CTTT:0.280822              | C:0.0616438   |
|       | CTTTT:0.657534 |   |     |                            |               |
| chr28 | 9390863        | 2 | 312 | G:0.891026                 | A:0.108974    |
| chr28 | 9390877        | 2 | 310 | A:0.96129                  | G:0.0387097   |
| chr28 | 9391347        | 2 | 296 | G:0.952703                 | T:0.0472973   |
| chr28 | 9391436        | 2 | 308 | A:0.954545                 | G:0.0454545   |
| chr28 | 9391460        | 2 | 306 | C:0.928105                 | A:0.0718954   |
| chr28 | 9391949        | 2 | 282 | TAA:0.822695               | T:0.177305    |

|             |         |   |     |                     |               |
|-------------|---------|---|-----|---------------------|---------------|
| chr28       | 9392036 | 2 | 302 | T:0.966887          | C:0.0331126   |
| chr28       | 9392240 | 2 | 302 | T:0.950331          | C:0.0496689   |
| chr28       | 9392571 | 2 | 298 | G:0.949664          | A:0.0503356   |
| chr28       | 9392725 | 2 | 308 | A:0.951299          | G:0.0487013   |
| chr28       | 9392832 | 2 | 314 | G:0.961783          | T:0.0382166   |
| chr28       | 9393098 | 2 | 310 | CGTTT:0.954839      | C:0.0451613   |
| chr28       | 9393371 | 2 | 312 | G:0.945513          | A:0.0544872   |
| chr28       | 9393865 | 2 | 282 | A:0.953901          | AAT:0.0460993 |
| chr28       | 9393906 | 2 | 292 | A:0.958904          | AC:0.0410959  |
| chr28       | 9394201 | 2 | 286 | C:0.961538          | T:0.0384615   |
| chr28       | 9394334 | 2 | 296 | T:0.945946          | TA:0.0540541  |
| chr28       | 9394397 | 2 | 318 | C:0.946541          | CT:0.0534591  |
| chr28       | 9394399 | 2 | 318 | GCCCAGTTAA:0.946541 | G:            |
| 0.0534591   |         |   |     |                     |               |
| chr28       | 9394573 | 2 | 296 | G:0.969595          | A:0.0304054   |
| chr28       | 9394893 | 2 | 304 | C:0.947368          | G:0.0526316   |
| chr28       | 9394988 | 2 | 294 | C:0.816327          | CT:0.183673   |
| chr28       | 9395160 | 2 | 294 | T:0.959184          | A:0.0408163   |
| chr28       | 9395301 | 2 | 304 | G:0.953947          | T:0.0460526   |
| chr28       | 9395358 | 2 | 306 | G:0.96732           | T:0.0326797   |
| chr28       | 9397180 | 2 | 290 | TA:0.958621         | T:0.0413793   |
| chr28       | 9397221 | 2 | 304 | T:0.960526          | TG:0.0394737  |
| chr28       | 9397328 | 2 | 304 | C:0.950658          | A:0.0493421   |
| chr28       | 9397335 | 2 | 304 | T:0.950658          | A:0.0493421   |
| chr28       | 9397356 | 2 | 298 | CT:0.969799         | C:0.0302013   |
| chr28       | 9397587 | 2 | 300 | C:0.956667          | T:0.0433333   |
| chr28       | 9397666 | 2 | 308 | A:0.935065          | T:0.0649351   |
| chr28       | 9398030 | 2 | 298 | A:0.963087          | G:0.0369128   |
| chr28       | 9398401 | 2 | 316 | TA:0.955696         | T:0.0443038   |
| chr28       | 9398419 | 2 | 316 | T:0.955696          | TA:0.0443038  |
| chr28       | 9398455 | 2 | 316 | T:0.955696          | G:0.0443038   |
| chr28       | 9398642 | 2 | 280 | A:0.95 T:0.05       |               |
| chr28       | 9398643 | 2 | 280 | A:0.95 C:0.05       |               |
| chr28       | 9398660 | 2 | 280 | A:0.95 G:0.05       |               |
| chr28       | 9398733 | 2 | 284 | C:0.957746          | T:0.0422535   |
| chr28       | 9399036 | 2 | 276 | G:0.971014          | A:0.0289855   |
| chr28       | 9399350 | 2 | 312 | CCT:0.426282        | C:0.573718    |
| chr28       | 9399378 | 2 | 312 | AAATT:0.971154      | A:0.0288462   |
| chr28       | 9399604 | 2 | 302 | T:0.94702           | C:0.0529801   |
| chr28       | 9399605 | 2 | 302 | G:0.94702           | A:0.0529801   |
| chr28       | 9399623 | 2 | 302 | G:0.94702           | C:0.0529801   |
| chr28       | 9399641 | 2 | 302 | T:0.94702           | C:0.0529801   |
| chr28       | 9399673 | 2 | 280 | G:0.957143          | A:0.0428571   |
| chr28       | 9399755 | 3 | 274 | TA:0.605839         | T:0.19708     |
| TAA:0.19708 |         |   |     |                     |               |
| chr28       | 9399791 | 2 | 296 | A:0.969595          | C:0.0304054   |
| chr28       | 9399927 | 2 | 306 | A:0.947712          | C:0.0522876   |
| chr28       | 9400413 | 2 | 284 | C:0.975352          | T:0.0246479   |
| chr28       | 9400472 | 2 | 314 | T:0.955414          | TG:0.044586   |
| chr28       | 9400654 | 2 | 304 | G:0.950658          | A:0.0493421   |
| chr28       | 9400813 | 2 | 306 | GA:0.908497         | G:0.0915033   |
| chr28       | 9400892 | 2 | 306 | C:0.954248          | T:0.0457516   |
| chr28       | 9401088 | 2 | 310 | C:0.958065          | A:0.0419355   |
| chr28       | 9401781 | 2 | 318 | A:0.959119          | ATGTGTGTGTG:  |

0.0408805

|       |         |   |     |             |              |
|-------|---------|---|-----|-------------|--------------|
| chr28 | 9401846 | 2 | 308 | G:0.951299  | A:0.0487013  |
| chr28 | 9401855 | 2 | 310 | G:0.980645  | A:0.0193548  |
| chr28 | 9402130 | 2 | 286 | A:0.954545  | AT:0.0454545 |
| chr28 | 9402175 | 3 | 258 | CT:0.577519 | C:0.325581   |

CTT:0.0968992

|       |         |   |     |              |             |
|-------|---------|---|-----|--------------|-------------|
| chr28 | 9402275 | 2 | 308 | T:0.957792   | C:0.0422078 |
| chr28 | 9402316 | 2 | 308 | T:0.951299   | C:0.0487013 |
| chr28 | 9402515 | 3 | 302 | ATC:0.811258 | A:0.145695  |

ATTCTC:0.0430464

|       |         |   |     |                 |                 |
|-------|---------|---|-----|-----------------|-----------------|
| chr28 | 9402517 | 2 | 298 | C:0.989933      | T:0.0100671     |
| chr28 | 9403020 | 2 | 306 | A:0.95098       | AT:0.0490196    |
| chr28 | 9403055 | 2 | 300 | AAC:0.953333    | A:0.0466667     |
| chr28 | 9403414 | 2 | 308 | T:0.951299      | C:0.0487013     |
| chr28 | 9403486 | 2 | 308 | T:0.954545      | C:0.0454545     |
| chr28 | 9403716 | 2 | 308 | A:0.957792      | G:0.0422078     |
| chr28 | 9403888 | 2 | 296 | C:0.932432      | T:0.0675676     |
| chr28 | 9403982 | 2 | 300 | G:0.96 C:0.04   |                 |
| chr28 | 9404223 | 2 | 292 | AAT:0.684932    | A:0.315068      |
| chr28 | 9404561 | 2 | 302 | G:0.94702       | A:0.0529801     |
| chr28 | 9404634 | 2 | 306 | C:0.954248      | T:0.0457516     |
| chr28 | 9404838 | 2 | 298 | T:0.946309      | C:0.0536913     |
| chr28 | 9404885 | 2 | 312 | T:0.958333      | G:0.0416667     |
| chr28 | 9405333 | 2 | 310 | A:0.948387      | G:0.0516129     |
| chr28 | 9405405 | 2 | 296 | C:0.952703      | A:0.0472973     |
| chr28 | 9405444 | 2 | 300 | G:0.946667      | T:0.0533333     |
| chr28 | 9405823 | 2 | 304 | A:0.960526      | G:0.0394737     |
| chr28 | 9405940 | 2 | 298 | G:0.956376      | GA:0.0436242    |
| chr28 | 9406050 | 2 | 298 | CT:0.956376     | C:0.0436242     |
| chr28 | 9406264 | 2 | 314 | G:0.958599      | A:0.0414013     |
| chr28 | 9406371 | 2 | 294 | C:0.962585      | G:0.037415      |
| chr28 | 9406496 | 2 | 302 | T:0.963576      | G:0.0364238     |
| chr28 | 9406604 | 2 | 300 | A:0.956667      | G:0.0433333     |
| chr28 | 9406877 | 2 | 298 | C:0.956376      | T:0.0436242     |
| chr28 | 9406943 | 2 | 294 | G:0.965986      | A:0.0340136     |
| chr28 | 9407001 | 2 | 300 | GTC:0.89 G:0.11 |                 |
| chr28 | 9407048 | 2 | 300 | TA:0.823333     | T:0.176667      |
| chr28 | 9407144 | 2 | 300 | G:0.943333      | A:0.0566667     |
| chr28 | 9407251 | 2 | 296 | G:0.945946      | A:0.0540541     |
| chr28 | 9407317 | 2 | 298 | CT:0.902685     | C:0.0973154     |
| chr28 | 9407363 | 2 | 296 | C:0.959459      | CAGAG:0.0405405 |
| chr28 | 9407435 | 2 | 292 | T:0.965753      | C:0.0342466     |
| chr28 | 9407708 | 2 | 306 | A:0.96732       | G:0.0326797     |
| chr28 | 9408117 | 2 | 306 | A:0.964052      | G:0.0359477     |
| chr28 | 9408844 | 2 | 298 | T:0.959732      | C:0.0402685     |
| chr28 | 9409094 | 5 | 314 | TATAA:0.375796  | T:0.197452      |

TATAAATAA:0.296178

TATAAATAAATAA:0.111465

TATAAATAAATAAATAA:0.0191083

|       |         |   |     |            |            |
|-------|---------|---|-----|------------|------------|
| chr28 | 9409136 | 2 | 318 | T:0.918239 | TAAATAAAA: |
|-------|---------|---|-----|------------|------------|

0.081761

|       |         |   |     |            |             |
|-------|---------|---|-----|------------|-------------|
| chr28 | 9409832 | 2 | 294 | A:0.94898  | G:0.0510204 |
| chr28 | 9412296 | 2 | 312 | G:0.955128 | A:0.0448718 |
| chr28 | 9412365 | 2 | 298 | C:0.956376 | T:0.0436242 |
| chr28 | 9412764 | 2 | 302 | T:0.960265 | A:0.0397351 |

|                |         |   |     |                              |               |
|----------------|---------|---|-----|------------------------------|---------------|
| chr28          | 9413209 | 2 | 230 | C:0.952174                   | CCT:0.0478261 |
| chr28          | 9414925 | 2 | 274 | TA:0.894161                  | T:0.105839    |
| chr28          | 9414938 | 2 | 282 | TTAA:0.964539                | T:0.035461    |
| chr28          | 9414939 | 2 | 272 | TA:0.0551471                 | T:0.944853    |
| chr28          | 9414983 | 2 | 296 | A:0 G:1                      |               |
| chr28          | 9415014 | 2 | 304 | A:0 G:1                      |               |
| chr28          | 9415036 | 2 | 304 | A:0 G:1                      |               |
| chr28          | 9415125 | 2 | 284 | A:0 C:1                      |               |
| chr28          | 9415544 | 2 | 286 | T:0.968531                   | G:0.0314685   |
| chr28          | 9416238 | 2 | 318 | C:0.446541                   | CA:0.553459   |
| chr28          | 9416347 | 2 | 318 | C:0.446541                   | CA:0.553459   |
| chr28          | 9416349 | 2 | 318 | C:0.446541                   | CA:0.553459   |
| chr28          | 9416351 | 2 | 318 | G:0.446541                   | GA:0.553459   |
| chr28          | 9416355 | 2 | 318 | C:0.446541                   | CT:0.553459   |
| chr28          | 9417023 | 2 | 306 | GTTA:0.941176                | G:0.0588235   |
| chr28          | 9417266 | 2 | 302 | G:0.953642                   | A:0.0463576   |
| chr28          | 9417400 | 2 | 308 | C:0.954545                   | T:0.0454545   |
| chr28          | 9417497 | 2 | 298 | C:0.963087                   | G:0.0369128   |
| chr28          | 9418472 | 2 | 304 | A:0.957237                   | T:0.0427632   |
| chr28          | 9418536 | 2 | 286 | A:0.965035                   | G:0.034965    |
| chr28          | 9419145 | 2 | 292 | T:0.962329                   | C:0.0376712   |
| chr28          | 9419440 | 3 | 292 | CATATAT:0.260274             | C:0.10274     |
| CATAT:0.636986 |         |   |     |                              |               |
| chr28          | 9420740 | 2 | 306 | T:0.924837                   | A:0.0751634   |
| chr28          | 9422117 | 3 | 278 | TAA:0.165468                 | T:0.133094    |
| TA:0.701439    |         |   |     |                              |               |
| chr28          | 9422780 | 2 | 310 | GTTTGTT:0.945161             | G:0.0548387   |
| chr28          | 9423180 | 2 | 296 | T:0.952703                   | A:0.0472973   |
| chr28          | 9423467 | 2 | 304 | A:0.960526                   | G:0.0394737   |
| chr28          | 9423648 | 2 | 302 | C:0.960265                   | T:0.0397351   |
| chr28          | 9423833 | 2 | 292 | C:0.982877                   | CT:0.0171233  |
| chr28          | 9423839 | 2 | 290 | T:0.937931                   | TG:0.062069   |
| chr28          | 9423840 | 2 | 292 | G:0.678082                   | T:0.321918    |
| chr28          | 9425194 | 2 | 290 | T:0.951724                   | G:0.0482759   |
| chr28          | 9425684 | 2 | 302 | C:0.950331                   | T:0.0496689   |
| chr28          | 9425738 | 2 | 300 | C:0.95 A:0.05                |               |
| chr28          | 9425879 | 2 | 288 | TA:0.958333                  | T:0.0416667   |
| chr28          | 9425882 | 2 | 288 | T:0.958333                   | C:0.0416667   |
| chr28          | 9425956 | 2 | 302 | G:0.963576                   | T:0.0364238   |
| chr28          | 9426387 | 2 | 304 | A:0.950658                   | G:0.0493421   |
| chr28          | 9426951 | 2 | 294 | T:0.982993                   | A:0.0170068   |
| chr28          | 9427212 | 2 | 314 | C:0.958599                   | T:0.0414013   |
| chr28          | 9427415 | 2 | 300 | A:0.956667                   | C:0.0433333   |
| chr28          | 9427767 | 2 | 306 | A:0.957516                   | T:0.0424837   |
| chr28          | 9428233 | 2 | 310 | T:0.954839                   | C:0.0451613   |
| chr28          | 9428369 | 2 | 302 | G:0.960265                   | A:0.0397351   |
| chr28          | 9428449 | 2 | 300 | G:0.963333                   | C:0.0366667   |
| chr28          | 9428465 | 2 | 302 | C:0.966887                   | T:0.0331126   |
| chr28          | 9428611 | 2 | 292 | ATCTCCCTGGTG:0               | A:1           |
| chr28          | 9428625 | 2 | 292 | TATCTTTC:0                   | T:1           |
| chr28          | 9428633 | 2 | 292 | C:0 CAAAAAAAAAAAAAAAAAAAAA:1 |               |
| chr28          | 9428636 | 2 | 292 | C:0 A:1                      |               |
| chr28          | 9428727 | 2 | 290 | C:0 A:1                      |               |
| chr28          | 9428782 | 2 | 298 | G:0 A:1                      |               |

|                                            |         |   |     |                    |                 |
|--------------------------------------------|---------|---|-----|--------------------|-----------------|
| chr28                                      | 9428833 | 2 | 304 | C:0.940789         | T:0.0592105     |
| chr28                                      | 9428852 | 2 | 306 | C:0 CA:1           |                 |
| chr28                                      | 9428890 | 2 | 310 | G:0.954839         | C:0.0451613     |
| chr28                                      | 9428914 | 2 | 310 | T:0.954839         | C:0.0451613     |
| chr28                                      | 9428931 | 2 | 310 | T:0 A:1            |                 |
| chr28                                      | 9429394 | 2 | 320 | A:0.95625          | T:0.04375       |
| chr28                                      | 9429401 | 2 | 320 | A:0.95625          |                 |
| ATAAATAAATAAATAAATAAATAAATAAATAAAT:0.04375 |         |   |     |                    |                 |
| chr28                                      | 9429409 | 2 | 320 | G:0.95625          | T:0.04375       |
| chr28                                      | 9429422 | 2 | 320 | C:0.95625          | G:0.04375       |
| chr28                                      | 9429460 | 2 | 310 | G:0.96129          | A:0.0387097     |
| chr28                                      | 9429511 | 2 | 300 | G:0.956667         | C:0.0433333     |
| chr28                                      | 9429518 | 2 | 300 | A:0.976667         | G:0.0233333     |
| chr28                                      | 9429977 | 2 | 296 | C:0.942568         | T:0.0574324     |
| chr28                                      | 9430651 | 2 | 264 | TA:0.94697         | T:0.0530303     |
| chr28                                      | 9431418 | 2 | 312 | T:0.967949         | G:0.0320513     |
| chr28                                      | 9431600 | 2 | 306 | T:0.947712         | C:0.0522876     |
| chr28                                      | 9431728 | 2 | 298 | TG:0.939597        | T:0.0604027     |
| chr28                                      | 9431746 | 2 | 302 | G:0.950331         | T:0.0496689     |
| chr28                                      | 9431863 | 2 | 298 | C:0.956376         | T:0.0436242     |
| chr28                                      | 9431864 | 2 | 298 | C:0.956376         | G:0.0436242     |
| chr28                                      | 9431869 | 2 | 298 | G:0.956376         | T:0.0436242     |
| chr28                                      | 9432029 | 2 | 300 | G:0.956667         | GAC:0.0433333   |
| chr28                                      | 9432086 | 2 | 298 | G:0.966443         | C:0.033557      |
| chr28                                      | 9432105 | 2 | 298 | C:0.966443         | T:0.033557      |
| chr28                                      | 9432107 | 2 | 298 | T:0.966443         | A:0.033557      |
| chr28                                      | 9432244 | 2 | 314 | C:0.977707         | T:0.022293      |
| chr28                                      | 9432247 | 2 | 314 | C:0.977707         |                 |
| CGGGATCCCTGGGTGGCGCAGCGGTTT:0.022293       |         |   |     |                    |                 |
| chr28                                      | 9432303 | 2 | 288 | T:0.96875          | C:0.03125       |
| chr28                                      | 9432351 | 2 | 304 | A:0.970395         | G:0.0296053     |
| chr28                                      | 9432764 | 2 | 310 | A:0.951613         | T:0.0483871     |
| chr28                                      | 9432963 | 2 | 304 | G:0.980263         | C:0.0197368     |
| chr28                                      | 9433378 | 2 | 304 | CAAAT:0.957237     | C:0.0427632     |
| chr28                                      | 9433708 | 2 | 300 | T:0.946667         | C:0.0533333     |
| chr28                                      | 9433904 | 2 | 304 | C:0.953947         | T:0.0460526     |
| chr28                                      | 9434848 | 2 | 298 | C:0.959732         | T:0.0402685     |
| chr28                                      | 9435007 | 2 | 300 | G:0.95 A:0.05      |                 |
| chr28                                      | 9435282 | 2 | 304 | A:0.944079         | T:0.0559211     |
| chr28                                      | 9435329 | 2 | 310 | G:0.951613         | A:0.0483871     |
| chr28                                      | 9435369 | 2 | 304 | G:0.944079         | T:0.0559211     |
| chr28                                      | 9435417 | 2 | 300 | A:0.946667         | C:0.0533333     |
| chr28                                      | 9435633 | 2 | 292 | G:0.952055         | A:0.0479452     |
| chr28                                      | 9435984 | 2 | 286 | G:0.755245         | GTT:0.244755    |
| chr28                                      | 9436029 | 2 | 310 | T:0.954839         | C:0.0451613     |
| chr28                                      | 9436182 | 2 | 300 | C:0.963333         | T:0.0366667     |
| chr28                                      | 9436385 | 2 | 308 | A:0.964286         | G:0.0357143     |
| chr28                                      | 9436531 | 2 | 298 | C:0.942953         | T:0.057047      |
| chr28                                      | 9437044 | 2 | 318 | GAAAAAAGA:0.940252 | G:              |
| 0.0597484                                  |         |   |     |                    |                 |
| chr28                                      | 9437167 | 3 | 314 | G:0.796178         | GAAGA:0.0605096 |
| GAAGAAAGAAAGAAAGA:0.143312                 |         |   |     |                    |                 |
| chr28                                      | 9437220 | 2 | 312 | AAG:0.974359       | A:0.025641      |
| chr28                                      | 9438308 | 2 | 306 | T:0.95098          | C:0.0490196     |

|              |         |   |     |                        |        |              |
|--------------|---------|---|-----|------------------------|--------|--------------|
| chr28        | 9438570 | 2 | 300 | A:0.95                 | G:0.05 |              |
| chr28        | 9438598 | 2 | 298 | A:0.956376             |        | G:0.0436242  |
| chr28        | 9439112 | 2 | 308 | G:0.954545             |        | A:0.0454545  |
| chr28        | 9439383 | 2 | 310 | A:0.954839             |        | C:0.0451613  |
| chr28        | 9439813 | 2 | 310 | C:0.951613             |        | T:0.0483871  |
| chr28        | 9439816 | 2 | 310 | C:0.951613             |        | T:0.0483871  |
| chr28        | 9439872 | 2 | 310 | G:0.951613             |        | A:0.0483871  |
| chr28        | 9440086 | 2 | 308 | G:0.961039             |        | A:0.038961   |
| chr28        | 9440269 | 2 | 300 | T:0.95                 | C:0.05 |              |
| chr28        | 9440301 | 2 | 308 | C:0.954545             |        | T:0.0454545  |
| chr28        | 9440404 | 2 | 286 | T:0.793706             |        | TA:0.206294  |
| chr28        | 9441330 | 2 | 300 | T:0.953333             |        | C:0.0466667  |
| chr28        | 9441547 | 3 | 304 | ATT:0.786184           |        | A:0.0559211  |
| AT:0.157895  |         |   |     |                        |        |              |
| chr28        | 9441578 | 2 | 302 | A:0.956954             |        | T:0.0430464  |
| chr28        | 9441710 | 2 | 290 | CAG:0.931034           |        | C:0.0689655  |
| chr28        | 9441745 | 2 | 294 | G:0.952381             |        | T:0.047619   |
| chr28        | 9441756 | 2 | 294 | C:0.952381             |        | T:0.047619   |
| chr28        | 9442441 | 2 | 122 | G:0                    | GC:1   |              |
| chr28        | 9442473 | 2 | 260 | A:0                    | AG:1   |              |
| chr28        | 9442561 | 2 | 310 | A:0.00322581           |        | C:0.996774   |
| chr28        | 9442666 | 2 | 306 | G:0.895425             |        | A:0.104575   |
| chr28        | 9442971 | 2 | 310 | C:0.951613             |        | T:0.0483871  |
| chr28        | 9443556 | 2 | 310 | CTTTT:0.958065         |        | C:0.0419355  |
| chr28        | 9443584 | 2 | 310 | C:0.958065             |        | T:0.0419355  |
| chr28        | 9443764 | 2 | 294 | A:0.94898              |        | G:0.0510204  |
| chr28        | 9443880 | 2 | 308 | A:0.961039             |        | T:0.038961   |
| chr28        | 9444011 | 2 | 288 | G:0.965278             |        | A:0.0347222  |
| chr28        | 9444061 | 2 | 302 | ATGT:0.953642          |        | A:0.0463576  |
| chr28        | 9444079 | 2 | 302 | T:0.953642             |        | C:0.0463576  |
| chr28        | 9444233 | 2 | 308 | T:0.996753             |        | A:0.00324675 |
| chr28        | 9444234 | 2 | 308 | T:0.912338             |        | A:0.0876623  |
| chr28        | 9444364 | 2 | 294 | A:0.952381             |        | T:0.047619   |
| chr28        | 9444470 | 2 | 310 | C:0.958065             |        | G:0.0419355  |
| chr28        | 9445035 | 2 | 304 | G:0.957237             |        | A:0.0427632  |
| chr28        | 9445149 | 2 | 312 | T:0.958333             |        | G:0.0416667  |
| chr28        | 9445583 | 2 | 318 | GTTTCATTTCTCC:0.924528 |        | G:           |
| 0.0754717    |         |   |     |                        |        |              |
| chr28        | 9445639 | 2 | 308 | C:0                    | CA:1   |              |
| chr28        | 9445772 | 2 | 300 | T:0.946667             |        | G:0.0533333  |
| chr28        | 9445921 | 2 | 294 | C:0.952381             |        | G:0.047619   |
| chr28        | 9445978 | 2 | 300 | GACAA:0.96             |        | G:0.04       |
| chr28        | 9445984 | 2 | 300 | C:0.96                 | T:0.04 |              |
| chr28        | 9446204 | 2 | 308 | A:0.967532             |        | G:0.0324675  |
| chr28        | 9446344 | 2 | 310 | A:0.996774             |        | T:0.00322581 |
| chr28        | 9446623 | 3 | 290 | GACAC:0.258621         |        | G:0.582759   |
| GAC:0.158621 |         |   |     |                        |        |              |
| chr28        | 9447360 | 2 | 306 | T:0.957516             |        | C:0.0424837  |
| chr28        | 9448027 | 2 | 296 | C:0                    | CT:1   |              |
| chr28        | 9448308 | 2 | 308 | T:0.886364             |        | C:0.113636   |
| chr28        | 9448777 | 2 | 294 | A:0.945578             |        | G:0.0544218  |
| chr28        | 9448821 | 2 | 290 | A:0.944828             |        | T:0.0551724  |
| chr28        | 9448828 | 2 | 290 | G:0.944828             |        | A:0.0551724  |
| chr28        | 9449544 | 2 | 310 | A:0.948387             |        | G:0.0516129  |



|                                                            |         |   |     |                       |                 |
|------------------------------------------------------------|---------|---|-----|-----------------------|-----------------|
| chr28                                                      | 9449897 | 2 | 314 | G:0.942675            | A:0.0573248     |
| chr28                                                      | 9449905 | 2 | 314 | A:0.942675            | G:0.0573248     |
| chr28                                                      | 9450169 | 2 | 296 | A:0.962838            | G:0.0371622     |
| chr28                                                      | 9450262 | 2 | 308 | A:0.944805            | G:0.0551948     |
| chr28                                                      | 9450367 | 2 | 306 | C:0.964052            | T:0.0359477     |
| chr28                                                      | 9450609 | 2 | 302 | G:0.953642            | A:0.0463576     |
| chr28                                                      | 9450610 | 2 | 302 | T:0.953642            | A:0.0463576     |
| chr28                                                      | 9450900 | 2 | 320 | G:0.95                | A:0.05          |
| chr28                                                      | 9451000 | 2 | 304 | T:0.960526            | G:0.0394737     |
| chr28                                                      | 9451020 | 2 | 304 | A:0.960526            | G:0.0394737     |
| chr28                                                      | 9451201 | 2 | 312 | T:0.948718            | C:0.0512821     |
| chr28                                                      | 9451362 | 2 | 300 | T:0.95                | C:0.05          |
| chr28                                                      | 9451900 | 2 | 306 | G:0.95098             | T:0.0490196     |
| chr28                                                      | 9452012 | 2 | 292 | G:0.965753            | A:0.0342466     |
| chr28                                                      | 9452028 | 2 | 288 | T:0.934028            | A:0.0659722     |
| chr28                                                      | 9452129 | 2 | 296 | T:0.952703            | C:0.0472973     |
| chr28                                                      | 9452233 | 2 | 286 | A:0.958042            | G:0.041958      |
| chr28                                                      | 9452270 | 2 | 264 | G:0.950758            | A:0.0492424     |
| chr28                                                      | 9452314 | 2 | 234 | TG:0.858974           | T:0.141026      |
| chr28                                                      | 9452427 | 2 | 288 | G:0.954861            | A:0.0451389     |
| chr28                                                      | 9452712 | 2 | 284 | A:0.954225            | G:0.0457746     |
| chr28                                                      | 9452734 | 2 | 286 | T:0.947552            | G:0.0524476     |
| chr28                                                      | 9453163 | 3 | 318 | C:0.345912            | CA:0.559748     |
| CAA:0.0943396                                              |         |   |     |                       |                 |
| chr28                                                      | 9453932 | 2 | 318 | TTATCTCTAAAA:0.927673 | T:              |
| 0.072327                                                   |         |   |     |                       |                 |
| chr28                                                      | 9454106 | 2 | 294 | A:0.959184            | T:0.0408163     |
| chr28                                                      | 9454107 | 2 | 294 | A:0.959184            | T:0.0408163     |
| chr28                                                      | 9454196 | 2 | 300 | C:0.963333            | T:0.0366667     |
| chr28                                                      | 9454395 | 2 | 298 | T:0.942953            | TA:0.057047     |
| chr28                                                      | 9454706 | 2 | 306 | TC:0.95098            | T:0.0490196     |
| chr28                                                      | 9454805 | 2 | 304 | C:0.950658            | T:0.0493421     |
| chr28                                                      | 9455025 | 2 | 304 | A:0.953947            | C:0.0460526     |
| chr28                                                      | 9455167 | 2 | 292 | T:0.958904            | C:0.0410959     |
| chr28                                                      | 9455343 | 2 | 306 | C:0.947712            | T:0.0522876     |
| chr28                                                      | 9455449 | 2 | 308 | A:0.941558            | G:0.0584416     |
| chr28                                                      | 9455723 | 2 | 300 | A:0.96                | G:0.04          |
| chr28                                                      | 9455757 | 2 | 296 | T:0.952703            | C:0.0472973     |
| chr28                                                      | 9455869 | 2 | 308 | T:0.957792            | C:0.0422078     |
| chr28                                                      | 9455902 | 2 | 298 | G:0.956376            | A:0.0436242     |
| chr28                                                      | 9456042 | 2 | 274 | C:0.952555            | A:0.0474453     |
| chr28                                                      | 9456143 | 2 | 286 | C:0.951049            | A:0.048951      |
| chr28                                                      | 9456168 | 2 | 308 | C:0.961039            | CTGTT:0.038961  |
| chr28                                                      | 9456189 | 2 | 308 | C:0.961039            | T:0.038961      |
| chr28                                                      | 9456651 | 2 | 312 | C:0.948718            | A:0.0512821     |
| chr28                                                      | 9456873 | 2 | 298 | A:0.95302             | T:0.0469799     |
| chr28                                                      | 9456996 | 2 | 316 | A:0.939873            | AGTCAGAATTG:    |
| 0.0601266                                                  |         |   |     |                       |                 |
| chr28                                                      | 9457229 | 2 | 302 | C:0.950331            | T:0.0496689     |
| chr28                                                      | 9457587 | 2 | 302 | A:0.956954            | ATACT:0.0430464 |
| chr28                                                      | 9457713 | 2 | 306 | C:0.954248            | T:0.0457516     |
| chr28                                                      | 9457811 | 2 | 316 | T:0.955696            |                 |
| TAGAAACTTACTGTTTTAAAAAATAAATAAATAAAATAAAATAAAAAA:0.0443038 |         |   |     |                       |                 |
| chr28                                                      | 9457928 | 2 | 308 | C:0.954545            | G:0.0454545     |

|                    |         |   |     |                   |                |
|--------------------|---------|---|-----|-------------------|----------------|
| chr28              | 9457936 | 2 | 308 | A:0.954545        | G:0.0454545    |
| chr28              | 9458001 | 2 | 304 | T:0.944079        | A:0.0559211    |
| chr28              | 9458292 | 2 | 304 | A:0.957237        | G:0.0427632    |
| chr28              | 9458778 | 2 | 288 | G:0.954861        | T:0.0451389    |
| chr28              | 9458795 | 2 | 284 | T:0.957746        | C:0.0422535    |
| chr28              | 9459245 | 2 | 310 | G:0.941935        | T:0.0580645    |
| chr28              | 9459498 | 2 | 302 | CA:0.943709       | C:0.0562914    |
| chr28              | 9459828 | 2 | 310 | A:0.948387        | G:0.0516129    |
| chr28              | 9459891 | 2 | 312 | A:0.961538        | C:0.0384615    |
| chr28              | 9460192 | 2 | 304 | T:0.957237        | C:0.0427632    |
| chr28              | 9461215 | 2 | 306 | A:0.947712        | G:0.0522876    |
| chr28              | 9461439 | 2 | 304 | A:0.950658        | G:0.0493421    |
| chr28              | 9462044 | 2 | 284 | A:0.978873        | T:0.0211268    |
| chr28              | 9462052 | 3 | 290 | A:0.827586        | T:0.0310345    |
| AT:0.141379        |         |   |     |                   |                |
| chr28              | 9462054 | 3 | 290 | T:0.313793        | A:0.0586207    |
| TA:0.627586        |         |   |     |                   |                |
| chr28              | 9462408 | 2 | 298 | G:0.963087        | A:0.0369128    |
| chr28              | 9462535 | 2 | 298 | A:0.946309        | G:0.0536913    |
| chr28              | 9462713 | 2 | 308 | G:0.961039        | T:0.038961     |
| chr28              | 9462752 | 2 | 312 | G:0.948718        | T:0.0512821    |
| chr28              | 9462942 | 2 | 306 | A:0.96732         | T:0.0326797    |
| chr28              | 9463848 | 2 | 298 | G:0.949664        | C:0.0503356    |
| chr28              | 9463906 | 2 | 292 | CCT:0.921233      | C:0.0787671    |
| chr28              | 9463999 | 2 | 310 | T:0.958065        | A:0.0419355    |
| chr28              | 9464086 | 2 | 304 | CAA:0.963816      | C:0.0361842    |
| chr28              | 9464290 | 2 | 282 | C:0.897163        | CAAT:0.102837  |
| chr28              | 9464350 | 2 | 304 | G:0.957237        | A:0.0427632    |
| chr28              | 9464386 | 3 | 300 | GATAT:0.743333    | G:0.0666667    |
| GAT:0.19           |         |   |     |                   |                |
| chr28              | 9465510 | 2 | 302 | C:0.953642        | A:0.0463576    |
| chr28              | 9465524 | 3 | 290 | G:0.524138        | GATTT:0.258621 |
| GATTTATTT:0.217241 |         |   |     |                   |                |
| chr28              | 9465616 | 2 | 284 | G:0.982394        | A:0.0176056    |
| chr28              | 9465675 | 2 | 274 | G:0.959854        | A:0.040146     |
| chr28              | 9466782 | 2 | 308 | T:0.957792        | C:0.0422078    |
| chr28              | 9466972 | 2 | 302 | G:0.94702         | A:0.0529801    |
| chr28              | 9467047 | 2 | 308 | G:0.938312        | A:0.0616883    |
| chr28              | 9467215 | 2 | 302 | AG:0.94702        | A:0.0529801    |
| chr28              | 9467298 | 2 | 288 | C:0.9375 T:0.0625 |                |
| chr28              | 9467639 | 2 | 306 | G:0.957516        | T:0.0424837    |
| chr28              | 9467695 | 2 | 308 | G:0.954545        | A:0.0454545    |
| chr28              | 9467980 | 2 | 308 | C:0.961039        | T:0.038961     |
| chr28              | 9468105 | 2 | 302 | T:0.940397        | C:0.0596026    |
| chr28              | 9468372 | 2 | 298 | C:0 A:1           |                |
| chr28              | 9468424 | 2 | 290 | G:0 T:1           |                |
| chr28              | 9468495 | 2 | 256 | G:0.765625        | T:0.234375     |
| chr28              | 9468515 | 2 | 208 | GC:0.8125         | G:0.1875       |
| chr28              | 9468894 | 2 | 304 | A:0.953947        | G:0.0460526    |
| chr28              | 9468919 | 2 | 302 | T:0.960265        | G:0.0397351    |
| chr28              | 9469082 | 2 | 292 | A:0.993151        | C:0.00684932   |
| chr28              | 9469240 | 2 | 290 | T:0.951724        | C:0.0482759    |
| chr28              | 9469513 | 2 | 302 | C:0.950331        | T:0.0496689    |
| chr28              | 9469663 | 2 | 310 | G:0.958065        | A:0.0419355    |

|                                            |         |   |     |                    |                   |
|--------------------------------------------|---------|---|-----|--------------------|-------------------|
| chr28                                      | 9469964 | 2 | 308 | A:0.948052         | C:0.0519481       |
| chr28                                      | 9470952 | 2 | 302 | A:0.940397         | G:0.0596026       |
| chr28                                      | 9471337 | 2 | 298 | T:0.963087         | C:0.0369128       |
| chr28                                      | 9471374 | 2 | 290 | A:0.965517         | T:0.0344828       |
| chr28                                      | 9471647 | 2 | 304 | T:0.953947         | C:0.0460526       |
| chr28                                      | 9471683 | 2 | 290 | C:0.965517         | T:0.0344828       |
| chr28                                      | 9471820 | 3 | 302 | TAAA:0.513245      | T:0.0331126       |
| TAA:0.453642                               |         |   |     |                    |                   |
| chr28                                      | 9471824 | 2 | 300 | A:0.97             | T:0.03            |
| chr28                                      | 9471834 | 2 | 300 | A:0.97             | T:0.03            |
| chr28                                      | 9471878 | 2 | 270 | TA:0.885185        | T:0.114815        |
| chr28                                      | 9472139 | 2 | 314 | G:0.94586          | GAATA:0.0541401   |
| chr28                                      | 9472160 | 2 | 314 | A:0.94586          | C:0.0541401       |
| chr28                                      | 9472164 | 3 | 314 | TA:0.83758         | T:0.10828         |
| TAA:0.0541401                              |         |   |     |                    |                   |
| chr28                                      | 9472507 | 2 | 298 | A:0.949664         | T:0.0503356       |
| chr28                                      | 9472509 | 2 | 298 | A:0.949664         | ATT:0.0503356     |
| chr28                                      | 9472687 | 2 | 294 | TAA:0.972789       | T:0.0272109       |
| chr28                                      | 9472771 | 2 | 302 | T:0.953642         | C:0.0463576       |
| chr28                                      | 9472811 | 2 | 298 | T:0.949664         | C:0.0503356       |
| chr28                                      | 9472976 | 2 | 306 | C:0.95098          | T:0.0490196       |
| chr28                                      | 9473107 | 2 | 304 | G:0.8125           | T:0.1875          |
| chr28                                      | 9473232 | 2 | 306 | T:0.405229         | C:0.594771        |
| chr28                                      | 9473467 | 2 | 298 | C:0.956376         | G:0.0436242       |
| chr28                                      | 9473630 | 2 | 294 | G:0.969388         | A:0.0306122       |
| chr28                                      | 9473921 | 2 | 312 | C:0.945513         | T:0.0544872       |
| chr28                                      | 9474078 | 2 | 304 | A:0.963816         | T:0.0361842       |
| chr28                                      | 9474098 | 2 | 300 | GT:0.91            | G:0.09            |
| chr28                                      | 9474243 | 2 | 304 | G:0.957237         | A:0.0427632       |
| chr28                                      | 9474274 | 2 | 296 | A:0.949324         | G:0.0506757       |
| chr28                                      | 9474534 | 2 | 304 | C:0.957237         | G:0.0427632       |
| chr28                                      | 9475305 | 2 | 308 | C:0.948052         | A:0.0519481       |
| chr28                                      | 9475872 | 2 | 306 | T:0.977124         | TA:0.0228758      |
| chr28                                      | 9475873 | 2 | 306 | A:0.964052         | T:0.0359477       |
| chr28                                      | 9477403 | 2 | 302 | C:0.963576         | G:0.0364238       |
| chr28                                      | 9477706 | 2 | 296 | C:0.898649         | A:0.101351        |
| chr28                                      | 9480667 | 2 | 298 | T:0.946309         | C:0.0536913       |
| chr28                                      | 9481732 | 2 | 314 | G:0.971338         | T:0.0286624       |
| chr28                                      | 9484016 | 2 | 300 | T:0.886667         | C:0.113333        |
| chr28                                      | 9484192 | 2 | 308 | G:0.905844         | GTA:0.0941558     |
| chr28                                      | 9484730 | 2 | 314 | T:0.977707         | C:0.022293        |
| chr28                                      | 9485452 | 2 | 294 | GTA:0.952381       | G:0.047619        |
| chr28                                      | 9485454 | 2 | 296 | A:0.945946         | G:0.0540541       |
| chr28                                      | 9485472 | 2 | 294 | C:0.904762         | T:0.0952381       |
| chr28                                      | 9486159 | 4 | 310 | ATATTTATT:0.274194 | A:                |
| 0.296774 ATATT:0.283871 ATATTTATT:0.145161 |         |   |     |                    |                   |
| chr28                                      | 9486719 | 3 | 300 | TGA:0.82           | T:0.123333 TGAGA: |
| 0.0566667                                  |         |   |     |                    |                   |
| chr28                                      | 9487304 | 2 | 308 | A:0.961039         | C:0.038961        |
| chr28                                      | 9488801 | 2 | 314 | AAG:0.936306       | A:0.0636943       |
| chr28                                      | 9489052 | 2 | 204 | AT:0.72549         | A:0.27451         |
| chr28                                      | 9489128 | 2 | 298 | C:0.966443         | T:0.033557        |
| chr28                                      | 9489474 | 2 | 298 | T:0                | A:1               |
| chr28                                      | 9490421 | 2 | 310 | C:0.880645         | T:0.119355        |

|                          |         |   |     |                         |                  |
|--------------------------|---------|---|-----|-------------------------|------------------|
| chr28                    | 9492278 | 2 | 306 | G:0.888889              | T:0.111111       |
| chr28                    | 9492364 | 2 | 306 | GC:0.862745             | G:0.137255       |
| chr28                    | 9492496 | 2 | 238 | TG:0.537815             | T:0.462185       |
| chr28                    | 9492789 | 2 | 286 | AT:0.283217             | A:0.716783       |
| chr28                    | 9492936 | 2 | 306 | C:0.879085              | A:0.120915       |
| chr28                    | 9493004 | 2 | 310 | G:0.945161              | T:0.0548387      |
| chr28                    | 9493238 | 3 | 308 | TTTTATTTA:0.746753      | T:               |
| 0.201299 TTTTA:0.0519481 |         |   |     |                         |                  |
| chr28                    | 9493368 | 2 | 296 | G:0.635135              | A:0.364865       |
| chr28                    | 9493572 | 2 | 298 | C:0.614094              | T:0.385906       |
| chr28                    | 9493903 | 2 | 310 | C:0.587097              | T:0.412903       |
| chr28                    | 9494588 | 2 | 304 | C:0.861842              | T:0.138158       |
| chr28                    | 9494885 | 2 | 314 | CTATGTTTCCTAGT:0.378981 | C:               |
| 0.621019                 |         |   |     |                         |                  |
| chr28                    | 9494918 | 2 | 314 | C:0.955414              | T:0.044586       |
| chr28                    | 9495016 | 2 | 294 | C:0.853741              | G:0.146259       |
| chr28                    | 9495288 | 2 | 252 | G:0.416667              | T:0.583333       |
| chr28                    | 9495331 | 2 | 258 | A:0.383721              | AT:0.616279      |
| chr28                    | 9495351 | 2 | 264 | TTTTAAATTA:0.893939     | T:               |
| 0.106061                 |         |   |     |                         |                  |
| chr28                    | 9495479 | 2 | 240 | T:0.554167              | A:0.445833       |
| chr28                    | 9495505 | 2 | 264 | C:0.420455              | A:0.579545       |
| chr28                    | 9495512 | 2 | 264 | C:0.420455              | A:0.579545       |
| chr28                    | 9495626 | 2 | 284 | C:0.454225              | CACAG:0.545775   |
| chr28                    | 9495731 | 2 | 282 | A:0.0531915             | G:0.946809       |
| chr28                    | 9495755 | 2 | 294 | G:0.585034              | A:0.414966       |
| chr28                    | 9495778 | 2 | 290 | G:0.575862              | A:0.424138       |
| chr28                    | 9496008 | 2 | 292 | T:0.60274               | TATG:0.39726     |
| chr28                    | 9496100 | 2 | 266 | C:0.556391              | T:0.443609       |
| chr28                    | 9496179 | 2 | 292 | GATT:0.876712           | G:0.123288       |
| chr28                    | 9496208 | 2 | 288 | AG:0.402778             | A:0.597222       |
| chr28                    | 9496209 | 2 | 288 | GGAGA:0.604167          | G:0.395833       |
| chr28                    | 9496213 | 2 | 288 | A:0.402778              | AG:0.597222      |
| chr28                    | 9496260 | 2 | 276 | G:0.427536              | T:0.572464       |
| chr28                    | 9496284 | 3 | 276 | T:0.427536              | C:0.442029       |
| G:0.130435               |         |   |     |                         |                  |
| chr28                    | 9496489 | 2 | 290 | CT:0.6 C:0.4            |                  |
| chr28                    | 9496593 | 2 | 284 | A:0.588028              | G:0.411972       |
| chr28                    | 9498183 | 2 | 304 | A:0.615132              | G:0.384868       |
| chr28                    | 9498273 | 2 | 306 | A:0.601307              | T:0.398693       |
| chr28                    | 9498387 | 2 | 294 | A:0.629252              | G:0.370748       |
| chr28                    | 9498587 | 3 | 294 | A:0.394558              | AT:0.455782      |
| ATT:0.14966              |         |   |     |                         |                  |
| chr28                    | 9498665 | 2 | 302 | A:0.486755              | G:0.513245       |
| chr28                    | 9498680 | 2 | 302 | G:0.639073              | A:0.360927       |
| chr28                    | 9498726 | 2 | 300 | T:0.406667              | G:0.593333       |
| chr28                    | 9498764 | 2 | 294 | G:0.840136              | A:0.159864       |
| chr28                    | 9498915 | 3 | 288 | GT:0.444444             | G:0.322917       |
| GTT:0.232639             |         |   |     |                         |                  |
| chr28                    | 9499084 | 2 | 310 | A:0.635484              | AGTTGTT:0.364516 |
| chr28                    | 9499151 | 2 | 296 | C:0.949324              | T:0.0506757      |
| chr28                    | 9499210 | 2 | 298 | G:0.469799              | GAA:0.530201     |
| chr28                    | 9499407 | 2 | 286 | GA:0.986014             | G:0.013986       |
| chr28                    | 9499490 | 2 | 300 | G:0.636667              | T:0.363333       |

|                     |         |   |     |                              |               |
|---------------------|---------|---|-----|------------------------------|---------------|
| chr28               | 9499610 | 2 | 306 | C:0.385621                   | T:0.614379    |
| chr28               | 9499889 | 2 | 312 | T:0.387821                   | G:0.612179    |
| chr28               | 9499975 | 2 | 298 | C:0.392617                   | A:0.607383    |
| chr28               | 9500610 | 2 | 304 | A:0.615132                   | G:0.384868    |
| chr28               | 9500809 | 2 | 306 | A:0.611111                   | G:0.388889    |
| chr28               | 9501246 | 2 | 290 | C:0.589655                   | T:0.410345    |
| chr28               | 9501285 | 2 | 286 | T:0.562937                   | C:0.437063    |
| chr28               | 9501415 | 3 | 312 | T:0.413462                   | TTA:0.233974  |
| TTTA:0.352564       |         |   |     |                              |               |
| chr28               | 9501431 | 2 | 312 | AT:0.410256                  | A:0.589744    |
| chr28               | 9501440 | 2 | 312 | T:0.410256                   | A:0.589744    |
| chr28               | 9501715 | 2 | 306 | CT:0.388889                  | C:0.611111    |
| chr28               | 9501902 | 2 | 308 | T:0.38961                    | C:0.61039     |
| chr28               | 9502402 | 2 | 310 | G:0.412903                   | A:0.587097    |
| chr28               | 9502449 | 2 | 312 | C:0.846154                   | T:0.153846    |
| chr28               | 9503233 | 2 | 308 | T:0.402597                   | C:0.597403    |
| chr28               | 9503303 | 2 | 300 | A:0.863333                   | G:0.136667    |
| chr28               | 9503721 | 2 | 282 | C:0.865248                   | T:0.134752    |
| chr28               | 9503885 | 2 | 304 | T:0.536184                   | G:0.463816    |
| chr28               | 9504296 | 2 | 306 | T:0.604575                   | C:0.395425    |
| chr28               | 9504525 | 2 | 306 | A:0.509804                   | C:0.490196    |
| chr28               | 9505005 | 2 | 304 | T:0.598684                   | C:0.401316    |
| chr28               | 9505226 | 2 | 304 | A:0.601974                   | G:0.398026    |
| chr28               | 9505395 | 2 | 304 | A:0.618421                   | AAAT:0.381579 |
| chr28               | 9505549 | 2 | 316 | CTCCTTCCTTTCCTGTATCTTTATGCT: |               |
| 0.398734 C:0.601266 |         |   |     |                              |               |
| chr28               | 9505860 | 2 | 290 | T:0.493103                   | C:0.506897    |
| chr28               | 9506135 | 2 | 300 | T:0.613333                   | A:0.386667    |
| chr28               | 9506136 | 2 | 300 | C:0.613333                   | A:0.386667    |
| chr28               | 9506513 | 2 | 310 | T:0.393548                   | A:0.606452    |
| chr28               | 9506791 | 2 | 312 | G:0.384615                   | A:0.615385    |
| chr28               | 9507084 | 2 | 306 | A:0.614379                   | G:0.385621    |
| chr28               | 9507340 | 2 | 314 | T:0.621019                   | TTCTCTCTCTC:  |
| 0.378981            |         |   |     |                              |               |
| chr28               | 9508167 | 2 | 290 | T:0.655172                   | C:0.344828    |
| chr28               | 9508173 | 2 | 298 | T:0.993289                   | G:0.00671141  |
| chr28               | 9508449 | 2 | 296 | A:0.611486                   | G:0.388514    |
| chr28               | 9508663 | 2 | 304 | G:0.792763                   | A:0.207237    |
| chr28               | 9508770 | 2 | 296 | G:0.618243                   | A:0.381757    |
| chr28               | 9509126 | 2 | 304 | G:0.473684                   | A:0.526316    |
| chr28               | 9509282 | 2 | 304 | T:0.460526                   | C:0.539474    |
| chr28               | 9509465 | 2 | 302 | C:0.596026                   | T:0.403974    |
| chr28               | 9509494 | 2 | 304 | T:0.401316                   | A:0.598684    |
| chr28               | 9510303 | 2 | 308 | C:0.405844                   | CT:0.594156   |
| chr28               | 9510340 | 2 | 282 | GTTTT:0.421986               | G:0.578014    |
| chr28               | 9510675 | 3 | 300 | TAA:0.5 T:0.36               | TA:0.14       |
| chr28               | 9511120 | 2 | 240 | AT:0.9 A:0.1                 |               |
| chr28               | 9511125 | 3 | 242 | T:0.119835                   | G:0.466942    |
| TG:0.413223         |         |   |     |                              |               |
| chr28               | 9511342 | 2 | 268 | CTTT:0.58209                 | C:0.41791     |
| chr28               | 9511791 | 2 | 314 | T:0.863057                   | C:0.136943    |
| chr28               | 9512450 | 3 | 292 | CCTCTCT:0.688356             | C:0.19863     |
| CCTCT:0.113014      |         |   |     |                              |               |
| chr28               | 9512527 | 2 | 296 | A:0.577703                   | C:0.422297    |

|                          |         |                    |     |                              |               |
|--------------------------|---------|--------------------|-----|------------------------------|---------------|
| chr28                    | 9512624 | 2                  | 306 | A:0.457516                   | C:0.542484    |
| chr28                    | 9512645 | 2                  | 304 | TG:0.628289                  | T:0.371711    |
| chr28                    | 9513488 | 5                  | 312 | GGT:0.365385                 | G:0.160256    |
| GGTGT:0.0673077          |         | GGTGTGTGT:0.144231 |     | GGTGTGTGTGT:0.262821         |               |
| chr28                    | 9513529 | 2                  | 320 | TTGATTTGCATTTCTCTGA:0.840625 |               |
| T:0.159375               |         |                    |     |                              |               |
| chr28                    | 9513642 | 2                  | 280 | CTT:0.485714                 | C:0.514286    |
| chr28                    | 9513673 | 2                  | 290 | T:0.413793                   | C:0.586207    |
| chr28                    | 9513850 | 2                  | 292 | A:0.366438                   | G:0.633562    |
| chr28                    | 9513900 | 2                  | 252 | C:0.59127                    | CTT:0.40873   |
| chr28                    | 9514092 | 2                  | 296 | C:0.962838                   | T:0.0371622   |
| chr28                    | 9514247 | 2                  | 308 | A:0.876623                   | G:0.123377    |
| chr28                    | 9514276 | 2                  | 292 | C:0.623288                   | T:0.376712    |
| chr28                    | 9514391 | 3                  | 288 | CCT:0.555556                 | C:0.322917    |
| CCTCT:0.121528           |         |                    |     |                              |               |
| chr28                    | 9515554 | 2                  | 310 | C:0.816129                   | T:0.183871    |
| chr28                    | 9516333 | 2                  | 302 | A:0.264901                   | ATAG:0.735099 |
| chr28                    | 9517458 | 2                  | 306 | G:0.784314                   | T:0.215686    |
| chr28                    | 9517894 | 2                  | 264 | GA:0.94697                   | G:0.0530303   |
| chr28                    | 9517899 | 2                  | 292 | GAAAAGAAAAGAAAAGA:0.780822   |               |
| G:0.219178               |         |                    |     |                              |               |
| chr28                    | 9517904 | 2                  | 288 | GAAAAGAAAAGA:0.809028        | G:            |
| 0.190972                 |         |                    |     |                              |               |
| chr28                    | 9517909 | 2                  | 316 | GAAAAGA:0.832278             | G:0.167722    |
| chr28                    | 9517914 | 2                  | 316 | GA:0.939873                  | G:0.0601266   |
| chr28                    | 9517928 | 3                  | 316 | AAAAAGAAAAG:0.443038         | A:            |
| 0.338608 AAAAAG:0.218354 |         |                    |     |                              |               |
| chr28                    | 9518095 | 2                  | 282 | GAGAA:0.897163               | G:0.102837    |
| chr28                    | 9518139 | 2                  | 310 | AAAAGAAAAGAAAG:0.845161      | A:            |
| 0.154839                 |         |                    |     |                              |               |
| chr28                    | 9518438 | 2                  | 278 | G:0.766187                   | T:0.233813    |
| chr28                    | 9518562 | 2                  | 304 | C:0.493421                   | CT:0.506579   |
| chr28                    | 9518567 | 2                  | 306 | T:0.513072                   | TA:0.486928   |
| chr28                    | 9518776 | 2                  | 260 | G:0.826923                   | C:0.173077    |
| chr28                    | 9518823 | 4                  | 296 | TAAAA:0.462838               | T:0.0675676   |
| TAA:0.226351             |         | TAAA:0.243243      |     |                              |               |
| chr28                    | 9518931 | 2                  | 302 | AC:0.298013                  | A:0.701987    |
| chr28                    | 9518934 | 2                  | 302 | TGGA:0.298013                | T:0.701987    |
| chr28                    | 9520117 | 2                  | 310 | C:0.903226                   | T:0.0967742   |
| chr28                    | 9520496 | 2                  | 312 | C:0.464744                   | G:0.535256    |
| chr28                    | 9520512 | 2                  | 312 | G:0.464744                   | A:0.535256    |
| chr28                    | 9520561 | 2                  | 298 | A:0.275168                   | T:0.724832    |
| chr28                    | 9520834 | 2                  | 300 | CA:0.276667                  | C:0.723333    |
| chr28                    | 9520922 | 2                  | 296 | G:0.486486                   | T:0.513514    |
| chr28                    | 9520997 | 2                  | 282 | G:0.755319                   | A:0.244681    |
| chr28                    | 9521353 | 2                  | 288 | T:0.802083                   | A:0.197917    |
| chr28                    | 9521380 | 2                  | 300 | G:0.543333                   | A:0.456667    |
| chr28                    | 9521388 | 2                  | 302 | C:0.486755                   | T:0.513245    |
| chr28                    | 9522025 | 2                  | 302 | C:0.801325                   | T:0.198675    |
| chr28                    | 9522046 | 3                  | 298 | G:0.802013                   | GAA:0.104027  |
| GAAA:0.0939597           |         |                    |     |                              |               |
| chr28                    | 9522056 | 2                  | 286 | AG:0.493007                  | A:0.506993    |
| chr28                    | 9522057 | 2                  | 292 | G:0.797945                   | A:0.202055    |
| chr28                    | 9522239 | 2                  | 304 | A:0.799342                   | T:0.200658    |

|                                                       |         |   |     |                         |                  |
|-------------------------------------------------------|---------|---|-----|-------------------------|------------------|
| chr28                                                 | 9522566 | 2 | 314 | G:0.77707               | T:0.22293        |
| chr28                                                 | 9522631 | 2 | 310 | C:0.787097              | T:0.212903       |
| chr28                                                 | 9522639 | 2 | 308 | A:0.876623              | G:0.123377       |
| chr28                                                 | 9522821 | 2 | 300 | C:0.323333              | CCTCTGT:0.676667 |
| chr28                                                 | 9523058 | 2 | 300 | T:0.613333              | G:0.386667       |
| chr28                                                 | 9523213 | 2 | 292 | C:0.643836              | T:0.356164       |
| chr28                                                 | 9524088 | 2 | 294 | G:0.687075              | A:0.312925       |
| chr28                                                 | 9524160 | 2 | 292 | T:0.59589               | TC:0.40411       |
| chr28                                                 | 9524162 | 2 | 292 | T:0.59589               | C:0.40411        |
| chr28                                                 | 9524196 | 2 | 278 | T:0.579137              | A:0.420863       |
| chr28                                                 | 9525081 | 2 | 300 | G:0.26 A:0.74           |                  |
| chr28                                                 | 9525142 | 2 | 308 | G:0.62987               | A:0.37013        |
| chr28                                                 | 9525692 | 2 | 306 | G:0.647059              | C:0.352941       |
| chr28                                                 | 9525696 | 2 | 310 | C:0.274194              | T:0.725806       |
| chr28                                                 | 9526115 | 2 | 304 | T:0.595395              | TA:0.404605      |
| chr28                                                 | 9526276 | 2 | 304 | G:0.957237              | A:0.0427632      |
| chr28                                                 | 9526780 | 2 | 308 | G:0.607143              | C:0.392857       |
| chr28                                                 | 9527150 | 2 | 310 | G:0.26129               | T:0.73871        |
| chr28                                                 | 9527488 | 2 | 200 | A:0.23 C:0.77           |                  |
| chr28                                                 | 9527492 | 2 | 200 | C:0.23 A:0.77           |                  |
| chr28                                                 | 9527499 | 2 | 250 | A:0.112 AC:0.888        |                  |
| chr28                                                 | 9527529 | 4 | 316 | GAAGAAAGA:0.731013      | G:               |
| 0.123418 GAAGA:0.0981013 GAAGAAAGAAAGA:0.0474684      |         |   |     |                         |                  |
| chr28                                                 | 9527537 | 2 | 316 | A:0.968354              | AAAG:0.0316456   |
| chr28                                                 | 9527764 | 2 | 292 | A:0.59589               | G:0.40411        |
| chr28                                                 | 9528033 | 2 | 282 | G:0.631206              | T:0.368794       |
| chr28                                                 | 9528160 | 2 | 306 | G:0.650327              | C:0.349673       |
| chr28                                                 | 9528182 | 3 | 302 | T:0.65894               | TA:0.175497      |
| TAA:0.165563                                          |         |   |     |                         |                  |
| chr28                                                 | 9528207 | 2 | 308 | A:0.704545              | AAC:0.295455     |
| chr28                                                 | 9528208 | 2 | 308 | A:0.587662              | AC:0.412338      |
| chr28                                                 | 9528209 | 2 | 312 | A:0.637821              | AAAC:0.362179    |
| chr28                                                 | 9528216 | 2 | 312 | A:0.964744              | AC:0.0352564     |
| chr28                                                 | 9528253 | 2 | 300 | T:0.633333              | C:0.366667       |
| chr28                                                 | 9528902 | 2 | 298 | A:0.271812              | G:0.728188       |
| chr28                                                 | 9529067 | 2 | 298 | C:0.248322              | T:0.751678       |
| chr28                                                 | 9529360 | 2 | 308 | C:0.633117              |                  |
| CACAGAGAAAGAGAGAGAGAGAGAGAGAGAGAGGCAGAGAGACA:0.366883 |         |   |     |                         |                  |
| chr28                                                 | 9529491 | 2 | 206 | G:0.194175              | GT:0.805825      |
| chr28                                                 | 9529511 | 2 | 208 | CTTATATTTATTTT:0.567308 | C:               |
| 0.432692                                              |         |   |     |                         |                  |
| chr28                                                 | 9529577 | 2 | 118 | A:0.822034              | AAG:0.177966     |
| chr28                                                 | 9529688 | 2 | 306 | G:0.591503              | T:0.408497       |
| chr28                                                 | 9529766 | 2 | 296 | A:0.699324              | ACC:0.300676     |
| chr28                                                 | 9529773 | 2 | 298 | T:0.258389              | C:0.741611       |
| chr28                                                 | 9530088 | 2 | 306 | A:0.663399              | G:0.336601       |
| chr28                                                 | 9531740 | 2 | 308 | T:0.642857              | C:0.357143       |
| chr28                                                 | 9532276 | 2 | 312 | A:0.660256              | G:0.339744       |
| chr28                                                 | 9533095 | 2 | 302 | A:0.274834              | G:0.725166       |
| chr28                                                 | 9533300 | 2 | 300 | T:0.68 G:0.32           |                  |
| chr28                                                 | 9533491 | 2 | 306 | A:0.676471              | T:0.323529       |
| chr28                                                 | 9533685 | 2 | 304 | G:0.634868              | T:0.365132       |
| chr28                                                 | 9533715 | 2 | 310 | T:0.951613              | C:0.0483871      |
| chr28                                                 | 9533792 | 2 | 308 | G:0.256494              | GT:0.743506      |

|                           |         |   |     |                      |                 |
|---------------------------|---------|---|-----|----------------------|-----------------|
| chr28                     | 9533874 | 2 | 308 | CT:0.662338          | C:0.337662      |
| chr28                     | 9534245 | 2 | 306 | T:0.653595           | TA:0.346405     |
| chr28                     | 9534425 | 2 | 314 | T:0.675159           | C:0.324841      |
| chr28                     | 9534450 | 3 | 318 | CTTTTATTTTA:0.600629 | C:              |
| 0.358491 CTTTTA:0.0408805 |         |   |     |                      |                 |
| chr28                     | 9534493 | 2 | 296 | TTTTA:0.621622       | T:0.378378      |
| chr28                     | 9534662 | 2 | 290 | C:0.355172           | T:0.644828      |
| chr28                     | 9534670 | 2 | 274 | TTC:0.894161         | T:0.105839      |
| chr28                     | 9534691 | 2 | 274 | T:0.339416           | TTTTA:0.660584  |
| chr28                     | 9534741 | 2 | 288 | G:0.649306           | C:0.350694      |
| chr28                     | 9534747 | 2 | 292 | G:0.633562           | A:0.366438      |
| chr28                     | 9535206 | 2 | 290 | C:0.675862           | T:0.324138      |
| chr28                     | 9535650 | 2 | 306 | A:0.300654           | G:0.699346      |
| chr28                     | 9535696 | 2 | 308 | C:0.253247           | T:0.746753      |
| chr28                     | 9535967 | 2 | 300 | T:0.63 C:0.37        |                 |
| chr28                     | 9536027 | 2 | 308 | TC:0.967532          | T:0.0324675     |
| chr28                     | 9536028 | 3 | 300 | C:0.333333           | CTT:0.336667    |
| CTTT:0.33                 |         |   |     |                      |                 |
| chr28                     | 9536056 | 2 | 292 | T:0.667808           | G:0.332192      |
| chr28                     | 9536195 | 2 | 280 | C:0.592857           | T:0.407143      |
| chr28                     | 9536362 | 2 | 300 | T:0.3 C:0.7          |                 |
| chr28                     | 9536624 | 3 | 286 | TA:0.744755          | T:0.0979021     |
| TAA:0.157343              |         |   |     |                      |                 |
| chr28                     | 9537154 | 2 | 304 | A:0.611842           | AT:0.388158     |
| chr28                     | 9537172 | 2 | 310 | AAC:0.954839         | A:0.0451613     |
| chr28                     | 9537354 | 2 | 300 | T:0.99 A:0.01        |                 |
| chr28                     | 9537511 | 2 | 302 | TA:0.688742          | T:0.311258      |
| chr28                     | 9537555 | 2 | 306 | A:0.627451           | T:0.372549      |
| chr28                     | 9537556 | 2 | 306 | T:0.627451           | G:0.372549      |
| chr28                     | 9537565 | 2 | 310 | A:0.7 C:0.3          |                 |
| chr28                     | 9537697 | 2 | 312 | G:0.955128           | C:0.0448718     |
| chr28                     | 9537699 | 2 | 312 | G:0.653846           | A:0.346154      |
| chr28                     | 9537780 | 2 | 306 | C:0.964052           | T:0.0359477     |
| chr28                     | 9538134 | 2 | 316 | T:0.632911           | TAAAAAAC:       |
| 0.367089                  |         |   |     |                      |                 |
| chr28                     | 9538161 | 2 | 316 | TCA:0.632911         | T:0.367089      |
| chr28                     | 9538230 | 2 | 286 | C:0.608392           | G:0.391608      |
| chr28                     | 9538320 | 2 | 262 | A:0.599237           | AG:0.400763     |
| chr28                     | 9538380 | 2 | 248 | G:0.673387           | C:0.326613      |
| chr28                     | 9538530 | 2 | 260 | A:0.623077           | G:0.376923      |
| chr28                     | 9538894 | 2 | 246 | CG:0.5 C:0.5         |                 |
| chr28                     | 9539003 | 2 | 288 | C:0.652778           | G:0.347222      |
| chr28                     | 9539029 | 2 | 296 | G:0.655405           | T:0.344595      |
| chr28                     | 9539131 | 2 | 290 | G:0.631034           | C:0.368966      |
| chr28                     | 9539496 | 2 | 282 | A:0.620567           | G:0.379433      |
| chr28                     | 9539650 | 2 | 310 | C:0.951613           | CTCTA:0.0483871 |
| chr28                     | 9539693 | 2 | 292 | A:0.657534           | T:0.342466      |
| chr28                     | 9539856 | 2 | 298 | A:0.667785           | G:0.332215      |
| chr28                     | 9539946 | 2 | 310 | C:0.680645           | T:0.319355      |
| chr28                     | 9540151 | 2 | 294 | G:0.636054           | A:0.363946      |
| chr28                     | 9540383 | 2 | 278 | T:0.661871           | TA:0.338129     |
| chr28                     | 9540981 | 2 | 310 | C:0.970968           | T:0.0290323     |
| chr28                     | 9542285 | 2 | 306 | G:0.683007           | C:0.316993      |
| chr28                     | 9542524 | 2 | 312 | C:0.990385           | G:0.00961538    |



|                               |         |   |     |                      |                |
|-------------------------------|---------|---|-----|----------------------|----------------|
| chr28                         | 9542826 | 2 | 288 | G:0.684028           | C:0.315972     |
| chr28                         | 9543002 | 2 | 292 | G:0.5 T:0.5          |                |
| chr28                         | 9543081 | 2 | 282 | G:0.585106           | C:0.414894     |
| chr28                         | 9543089 | 2 | 292 | T:0.976027           | TGTG:0.0239726 |
| chr28                         | 9543110 | 2 | 268 | GGT:0.955224         | G:0.0447761    |
| chr28                         | 9543112 | 2 | 298 | T:0.734899           | TGGTG:0.265101 |
| chr28                         | 9543441 | 2 | 310 | CCCTCTA:0.822581     | C:0.177419     |
| chr28                         | 9543447 | 2 | 308 | A:0.672078           | C:0.327922     |
| chr28                         | 9543483 | 2 | 300 | TCTCA:0.686667       | T:0.313333     |
| chr28                         | 9543487 | 2 | 300 | A:0.846667           | T:0.153333     |
| chr28                         | 9543735 | 2 | 298 | C:0.526846           | T:0.473154     |
| chr28                         | 9543860 | 3 | 316 | AACACACACAC:0.537975 | A:             |
| 0.224684 AACACACACAC:0.237342 |         |   |     |                      |                |
| chr28                         | 9544056 | 2 | 306 | A:0.486928           | AT:0.513072    |
| chr28                         | 9544375 | 2 | 306 | G:0.679739           | C:0.320261     |
| chr28                         | 9544725 | 2 | 294 | C:0.693878           | CT:0.306122    |
| chr28                         | 9544848 | 2 | 308 | G:0.957792           | GTCA:0.0422078 |
| chr28                         | 9545657 | 2 | 284 | G:0.623239           | GC:0.376761    |
| chr28                         | 9545740 | 2 | 306 | G:0.663399           | A:0.336601     |
| chr28                         | 9546080 | 2 | 306 | C:0.444444           | CTAAA:0.555556 |
| chr28                         | 9546249 | 2 | 306 | T:0.614379           | A:0.385621     |
| chr28                         | 9546401 | 2 | 302 | G:0.423841           | T:0.576159     |
| chr28                         | 9547729 | 2 | 300 | G:0.986667           | A:0.0133333    |
| chr28                         | 9547754 | 2 | 308 | G:0.5 GAACTT:0.5     |                |
| chr28                         | 9547967 | 2 | 306 | T:0.656863           | C:0.343137     |
| chr28                         | 9548836 | 2 | 290 | G:0.993103           | T:0.00689655   |
| chr28                         | 9548879 | 2 | 288 | C:0.940972           | CCT:0.0590278  |
| chr28                         | 9548927 | 2 | 298 | T:0.486577           | TA:0.513423    |
| chr28                         | 9549186 | 2 | 310 | TAA:0.641935         | T:0.358065     |
| chr28                         | 9549260 | 2 | 304 | C:0.963816           | T:0.0361842    |
| chr28                         | 9549466 | 2 | 306 | T:0.503268           | G:0.496732     |
| chr28                         | 9549533 | 2 | 306 | A:0.699346           | G:0.300654     |
| chr28                         | 9549617 | 2 | 308 | T:0.659091           | G:0.340909     |
| chr28                         | 9550879 | 3 | 292 | GAA:0.380137         | G:0.383562     |
| GA:0.236301                   |         |   |     |                      |                |
| chr28                         | 9550955 | 2 | 306 | T:0.5 G:0.5          |                |
| chr28                         | 9551321 | 2 | 296 | AT:0.831081          | A:0.168919     |
| chr28                         | 9551324 | 2 | 296 | T:0.236486           | A:0.763514     |
| chr28                         | 9551336 | 2 | 300 | C:0.826667           | T:0.173333     |
| chr28                         | 9551751 | 2 | 300 | A:0.83 G:0.17        |                |
| chr28                         | 9552058 | 2 | 312 | G:0.99359            | A:0.00641026   |
| chr28                         | 9552210 | 2 | 300 | A:0.976667           | G:0.0233333    |
| chr28                         | 9552368 | 2 | 310 | A:0.841935           | G:0.158065     |
| chr28                         | 9552896 | 2 | 302 | GA:0.847682          | G:0.152318     |
| chr28                         | 9552963 | 2 | 296 | T:0.5 C:0.5          |                |
| chr28                         | 9553043 | 2 | 304 | C:0.710526           | CCTCT:0.289474 |
| chr28                         | 9553084 | 2 | 302 | T:0.834437           | TA:0.165563    |
| chr28                         | 9553085 | 2 | 308 | A:0.993506           | T:0.00649351   |
| chr28                         | 9553087 | 2 | 306 | A:0.98366            | AT:0.0163399   |
| chr28                         | 9553185 | 2 | 310 | ATTCTT:0.845161      | A:0.154839     |
| chr28                         | 9553297 | 2 | 294 | CAT:0.993197         | C:0.00680272   |
| chr28                         | 9553608 | 2 | 308 | G:0.49026            | A:0.50974      |
| chr28                         | 9553743 | 2 | 304 | TA:0.832237          | T:0.167763     |
| chr28                         | 9554716 | 2 | 300 | T:0.893333           | G:0.106667     |

chr28 9555719 2 306 A:0.823529 C:0.176471  
chr28 9556220 3 306 TA:0.823529 T:0.0620915  
TAA:0.114379  
chr28 9556926 2 306 C:0.872549 G:0.127451  
chr28 9557108 2 296 A:0.983108 T:0.0168919  
chr28 9557190 2 300 T:0.436667 C:0.563333  
chr28 9557298 2 300 A:0.836667 T:0.163333  
chr28 9557305 2 298 T:0.825503 A:0.174497  
chr28 9557451 2 302 C:0.983444 T:0.0165563  
chr28 9558305 2 296 AAGAT:0.959459 A:0.0405405  
chr28 9558311 3 308 G:0.243506 T:0.425325  
GATTTATTTATTTATTT:0.331169  
chr28 9558838 2 280 T:0.592857 C:0.407143  
chr28 9559014 2 284 G:0.570423 GA:0.429577  
chr28 9559483 2 288 G:0.555556 A:0.444444  
chr28 9559536 6 302  
ATTTCTTTTCTTTTCTTTTCTTTTCTTTTCTTTTCT:0.321192 A:0.248344  
ATTTCT:0.0761589 ATTTCTTTTCTTTTCT:0.0695364  
ATTTCTTTTCTTTTCTTTTCT:0.198675 ATTTCTTTTCTTTTCTTTTCTTTTCT:  
0.0860927  
chr28 9559552 2 290 TTTCTTTTCTTTTCTTTTCTTTTCTTTTCT:  
0.97931 T:0.0206897  
chr28 9560695 2 288 A:0.618056 G:0.381944  
chr28 9560734 2 278 C:0.607914 T:0.392086  
chr28 9561005 2 270 G:0.544444 GAA:0.455556  
chr28 9561271 2 300 T:0.623333 C:0.376667  
chr28 9561290 2 296 G:0.658784 A:0.341216  
chr28 9561550 2 306 G:0.673203 A:0.326797  
chr28 9561952 2 298 C:0.459732 CCT:0.540268  
chr28 9561991 2 308 T:0.805195 A:0.194805  
chr28 9561992 2 308 T:0.805195 A:0.194805  
chr28 9562048 2 320 T:0.828125  
TAAGCGTCTGACTCTTAAAAATAAAAAAAAAAAATAAATAAATAAAAAAAAAAA:0.171875  
chr28 9562139 3 302 TAAAAA:0.427152 T:0.228477  
TAAAAA:0.344371  
chr28 9562141 2 280 A:0.685714 T:0.314286  
chr28 9562226 2 304 C:0.865132 T:0.134868  
chr28 9562307 2 302 A:0.662252 G:0.337748  
chr28 9562854 2 114 GTC:0.815789 G:0.184211  
chr28 9562963 2 256 C:0.496094 T:0.503906  
chr28 9563089 2 300 ACTTC:0.96 A:0.04  
chr28 9563094 2 300 T:0.96 G:0.04  
chr28 9563687 2 304 T:0.453947 C:0.546053  
chr28 9563689 2 304 T:0.828947 C:0.171053  
chr28 9563728 2 310 G:0.990323 A:0.00967742  
chr28 9563806 2 306 C:0.437908 T:0.562092  
chr28 9563872 2 296 A:0.449324 G:0.550676  
chr28 9563966 2 304 T:0.417763 C:0.582237  
chr28 9564087 2 284 T:0.401408 A:0.598592  
chr28 9564157 4 314 CATATATATATATATATAT:0.187898  
C:0.343949 CAT:0.404459 CATATATATATATATATAT:0.0636943  
chr28 9564232 2 286 A:0.370629 G:0.629371  
chr28 9564455 2 286 C:0.41958 A:0.58042  
chr28 9564517 2 308 C:0.461039 T:0.538961

|                  |         |   |     |                  |                  |
|------------------|---------|---|-----|------------------|------------------|
| chr28            | 9564662 | 2 | 298 | ATACC:0.459732   | A:0.540268       |
| chr28            | 9564839 | 2 | 302 | A:0.622517       | ATCTC:0.377483   |
| chr28            | 9564860 | 2 | 300 | T:0.953333       | TC:0.0466667     |
| chr28            | 9564863 | 2 | 300 | T:0.953333       | TTC:0.0466667    |
| chr28            | 9564880 | 2 | 294 | C:0.959184       | T:0.0408163      |
| chr28            | 9564988 | 2 | 292 | C:0.421233       | T:0.578767       |
| chr28            | 9565137 | 2 | 308 | G:0.448052       | A:0.551948       |
| chr28            | 9565255 | 2 | 306 | T:0.986928       | G:0.0130719      |
| chr28            | 9565492 | 2 | 304 | T:0.434211       | A:0.565789       |
| chr28            | 9565976 | 2 | 300 | CT:0.933333      | C:0.0666667      |
| chr28            | 9566010 | 2 | 308 | C:0.467532       | T:0.532468       |
| chr28            | 9566172 | 2 | 312 | CTTCCTAT:0.49359 | C:0.50641        |
| chr28            | 9566326 | 2 | 308 | T:0.948052       | C:0.0519481      |
| chr28            | 9566408 | 2 | 308 | T:0.448052       | C:0.551948       |
| chr28            | 9566466 | 2 | 308 | T:0.983766       | C:0.0162338      |
| chr28            | 9566635 | 2 | 298 | CT:0.419463      | C:0.580537       |
| chr28            | 9566638 | 2 | 304 | T:0.513158       | C:0.486842       |
| chr28            | 9566641 | 3 | 310 | T:0.945161       | TTTTTC:0.0419355 |
| TTTTTC:0.0129032 |         |   |     |                  |                  |
| chr28            | 9566845 | 2 | 296 | A:0.476351       | T:0.523649       |
| chr28            | 9566980 | 3 | 304 | CAA:0.460526     | C:0.473684       |
| CA:0.0657895     |         |   |     |                  |                  |
| chr28            | 9567018 | 2 | 292 | C:0.452055       | T:0.547945       |
| chr28            | 9567089 | 2 | 296 | A:0.445946       | G:0.554054       |
| chr28            | 9567242 | 2 | 292 | C:0.479452       | T:0.520548       |
| chr28            | 9567334 | 2 | 276 | T:0.463768       | G:0.536232       |
| chr28            | 9567374 | 2 | 298 | T:0.493289       | TAAAAAA:0.506711 |
| chr28            | 9567491 | 2 | 300 | A:0.456667       | T:0.543333       |
| chr28            | 9567567 | 2 | 306 | A:0.447712       | G:0.552288       |
| chr28            | 9567838 | 2 | 306 | T:0.924837       | C:0.0751634      |
| chr28            | 9568410 | 2 | 312 | C:0.935897       | T:0.0641026      |
| chr28            | 9568453 | 2 | 304 | A:0.480263       | C:0.519737       |
| chr28            | 9568758 | 2 | 296 | T:0.945946       | G:0.0540541      |
| chr28            | 9568823 | 2 | 300 | T:0.453333       | C:0.546667       |
| chr28            | 9568867 | 2 | 300 | T:0.953333       | A:0.0466667      |
| chr28            | 9568868 | 2 | 304 | A:0.944079       | T:0.0559211      |
| chr28            | 9568876 | 2 | 304 | A:0.944079       | T:0.0559211      |
| chr28            | 9568938 | 2 | 302 | TAC:0.923841     | T:0.0761589      |
| chr28            | 9569039 | 2 | 292 | C:0.945205       | CAT:0.0547945    |
| chr28            | 9569139 | 2 | 306 | A:0.973856       | G:0.0261438      |
| chr28            | 9569192 | 2 | 306 | A:0.964052       | AG:0.0359477     |
| chr28            | 9569449 | 2 | 302 | T:0.917219       | C:0.0827815      |
| chr28            | 9569456 | 2 | 302 | T:0.917219       | C:0.0827815      |
| chr28            | 9569549 | 2 | 304 | A:0.930921       | T:0.0690789      |
| chr28            | 9569567 | 2 | 308 | A:0.477273       | G:0.522727       |
| chr28            | 9569730 | 2 | 306 | A:0.918301       | G:0.0816993      |
| chr28            | 9569792 | 2 | 298 | C:0.95302        | T:0.0469799      |
| chr28            | 9569865 | 2 | 306 | T:0.915033       | TA:0.0849673     |
| chr28            | 9569873 | 3 | 316 | A:0.490506       | AAAG:0.0696203   |
| AAAAAAG:0.439873 |         |   |     |                  |                  |
| chr28            | 9569932 | 2 | 310 | T:0.945161       | G:0.0548387      |
| chr28            | 9569936 | 2 | 310 | T:0.945161       | C:0.0548387      |
| chr28            | 9570043 | 2 | 310 | T:0.948387       | A:0.0516129      |
| chr28            | 9570739 | 2 | 288 | T:0.482639       | TA:0.517361      |

|                                    |              |   |     |                 |                  |
|------------------------------------|--------------|---|-----|-----------------|------------------|
| chr28                              | 9570895      | 2 | 302 | C:0.933775      | T:0.0662252      |
| chr28                              | 9571027      | 2 | 302 | T:0.956954      | A:0.0430464      |
| chr28                              | 9571090      | 2 | 290 | A:0.937931      | T:0.062069       |
| chr28                              | 9571210      | 2 | 308 | C:0.951299      | T:0.0487013      |
| chr28                              | 9571231      | 2 | 290 | TA:0.47931      | T:0.52069        |
| chr28                              | 9571414      | 2 | 298 | T:0.432886      | G:0.567114       |
| chr28                              | 9571507      | 2 | 306 | A:0.46732       | G:0.53268        |
| chr28                              | 9571879      | 2 | 304 | A:0.480263      | T:0.519737       |
| chr28                              | 9572284      | 2 | 284 | TCAG:0.693662   | T:0.306338       |
| chr28                              | 9572372      | 4 | 236 | AG:0.516949     | A:0.127119       |
| AGG:0.199153                       | AGGG:0.15678 |   |     |                 |                  |
| chr28                              | 9574033      | 2 | 296 | G:0.956081      | T:0.0439189      |
| chr28                              | 9574255      | 2 | 300 | G:0.943333      | T:0.0566667      |
| chr28                              | 9574382      | 2 | 308 | G:0.944805      | C:0.0551948      |
| chr28                              | 9574497      | 2 | 296 | G:0.753378      | GT:0.246622      |
| chr28                              | 9574508      | 2 | 308 | T:0.944805      | TTTA:0.0551948   |
| chr28                              | 9574595      | 2 | 308 | C:0.951299      | T:0.0487013      |
| chr28                              | 9574685      | 2 | 314 | C:0.929936      | T:0.0700637      |
| chr28                              | 9574911      | 2 | 308 | G:0.954545      | T:0.0454545      |
| chr28                              | 9575111      | 2 | 298 | T:0.701342      | TG:0.298658      |
| chr28                              | 9575539      | 2 | 318 | T:0.95283       | TC:0.0471698     |
| chr28                              | 9575563      | 2 | 318 | G:0.95283       | T:0.0471698      |
| chr28                              | 9575754      | 2 | 302 | A:0.923841      | G:0.0761589      |
| chr28                              | 9575783      | 2 | 306 | A:0.960784      | T:0.0392157      |
| chr28                              | 9576019      | 2 | 308 | A:0.954545      | T:0.0454545      |
| chr28                              | 9576029      | 2 | 308 | A:0.954545      | T:0.0454545      |
| chr28                              | 9576357      | 2 | 302 | T:0.956954      | G:0.0430464      |
| chr28                              | 9576358      | 2 | 302 | T:0.956954      | C:0.0430464      |
| chr28                              | 9576589      | 2 | 304 | G:0.950658      | A:0.0493421      |
| chr28                              | 9576677      | 2 | 310 | C:0.267742      | G:0.732258       |
| chr28                              | 9577179      | 2 | 308 | ATAAAG:0.935065 | A:0.0649351      |
| chr28                              | 9577329      | 2 | 184 | TG:0.907609     | T:0.0923913      |
| chr28                              | 9577593      | 2 | 304 | A:0.858553      | G:0.141447       |
| chr28                              | 9577819      | 2 | 304 | A:0.980263      | G:0.0197368      |
| chr28                              | 9577997      | 2 | 308 | C:0.941558      | T:0.0584416      |
| chr28                              | 9578021      | 2 | 318 | C:0.943396      | CGGG:0.0566038   |
| chr28                              | 9578022      | 2 | 318 | A:0.943396      | ATCCCTGGGTGGCGC: |
| 0.0566038                          |              |   |     |                 |                  |
| chr28                              | 9578024      | 2 | 318 | G:0.943396      |                  |
| GCGGTTTGCGCCTGCCT:0.0566038        |              |   |     |                 |                  |
| chr28                              | 9578050      | 2 | 306 | G:0.794118      | A:0.205882       |
| chr28                              | 9578247      | 2 | 300 | A:0.966667      | G:0.0333333      |
| chr28                              | 9578336      | 2 | 320 | A:0.95          |                  |
| ATTATCTTTATTATTTCTTTTTTTTTTTT:0.05 |              |   |     |                 |                  |
| chr28                              | 9578932      | 2 | 300 | T:0.963333      | G:0.0366667      |
| chr28                              | 9579011      | 2 | 318 | A:0.955975      |                  |
| ATATAGAATATATGTCAT:0.0440252       |              |   |     |                 |                  |
| chr28                              | 9579015      | 2 | 318 | A:0.955975      | ATAT:0.0440252   |
| chr28                              | 9579016      | 2 | 318 | C:0.955975      | G:0.0440252      |
| chr28                              | 9579207      | 2 | 310 | G:0.948387      | A:0.0516129      |
| chr28                              | 9579410      | 2 | 308 | C:0.987013      | T:0.012987       |
| chr28                              | 9579440      | 2 | 310 | T:0.96129       | C:0.0387097      |
| chr28                              | 9579871      | 2 | 302 | G:0.970199      | T:0.0298013      |
| chr28                              | 9580107      | 2 | 314 | A:0.33121       | G:0.66879        |

|                 |         |   |     |                |               |
|-----------------|---------|---|-----|----------------|---------------|
| chr28           | 9580128 | 2 | 316 | C:0.265823     | T:0.734177    |
| chr28           | 9580216 | 2 | 300 | G:0.216667     | A:0.783333    |
| chr28           | 9580396 | 2 | 304 | T:0.960526     | G:0.0394737   |
| chr28           | 9580457 | 2 | 310 | G:0.951613     | A:0.0483871   |
| chr28           | 9580922 | 2 | 308 | A:0.948052     | AT:0.0519481  |
| chr28           | 9580931 | 2 | 304 | C:0.950658     | CCA:0.0493421 |
| chr28           | 9581200 | 2 | 280 | TA:0.807143    | T:0.192857    |
| chr28           | 9581214 | 2 | 274 | AT:0.79562     | A:0.20438     |
| chr28           | 9581215 | 2 | 278 | T:0.546763     | A:0.453237    |
| chr28           | 9581374 | 2 | 290 | G:0.941379     | A:0.0586207   |
| chr28           | 9581495 | 2 | 286 | G:0.986014     | A:0.013986    |
| chr28           | 9581533 | 2 | 278 | G:0.960432     | A:0.0395683   |
| chr28           | 9581568 | 2 | 294 | G:0.97619      | A:0.0238095   |
| chr28           | 9581640 | 2 | 310 | T:0.945161     | C:0.0548387   |
| chr28           | 9581651 | 2 | 312 | C:0.689103     | T:0.310897    |
| chr28           | 9581821 | 2 | 296 | G:0.966216     | A:0.0337838   |
| chr28           | 9581918 | 2 | 306 | A:0.944444     | G:0.0555556   |
| chr28           | 9582135 | 2 | 296 | T:0.956081     | C:0.0439189   |
| chr28           | 9582608 | 2 | 308 | A:0.944805     | G:0.0551948   |
| chr28           | 9582966 | 2 | 316 | A:0.958861     | AT:0.0411392  |
| chr28           | 9582975 | 2 | 316 | G:0.958861     | A:0.0411392   |
| chr28           | 9582976 | 2 | 308 | C:0.337662     | CT:0.662338   |
| chr28           | 9582986 | 2 | 316 | T:0.958861     | TA:0.0411392  |
| chr28           | 9583014 | 2 | 312 | TGAGA:0.935897 | T:0.0641026   |
| chr28           | 9583915 | 2 | 304 | A:0.960526     | AGT:0.0394737 |
| chr28           | 9584159 | 2 | 304 | G:0.967105     | GC:0.0328947  |
| chr28           | 9584161 | 2 | 304 | G:0.967105     | A:0.0328947   |
| chr28           | 9584202 | 2 | 304 | A:0.710526     | G:0.289474    |
| chr28           | 9584260 | 2 | 270 | G:0.966667     | GTC:0.0333333 |
| chr28           | 9584262 | 2 | 292 | C:0.962329     | CTA:0.0376712 |
| chr28           | 9585083 | 2 | 314 | G:0.958599     | A:0.0414013   |
| chr28           | 9585095 | 2 | 314 | A:0.958599     | G:0.0414013   |
| chr28           | 9585230 | 2 | 306 | C:0.69281      | T:0.30719     |
| chr28           | 9585360 | 2 | 292 | G:0.736301     | GT:0.263699   |
| chr28           | 9586291 | 2 | 306 | A:0.954248     | G:0.0457516   |
| chr28           | 9586670 | 2 | 302 | G:0.986755     | A:0.013245    |
| chr28           | 9587213 | 2 | 298 | C:0.956376     | CT:0.0436242  |
| chr28           | 9587279 | 2 | 304 | T:0.963816     | C:0.0361842   |
| chr28           | 9587607 | 2 | 310 | C:0.945161     | G:0.0548387   |
| chr28           | 9587634 | 2 | 316 | T:0.949367     | C:0.0506329   |
| chr28           | 9587706 | 2 | 300 | G:0.94 GT:0.06 |               |
| chr28           | 9588002 | 2 | 298 | C:0.95302      | T:0.0469799   |
| chr28           | 9588003 | 2 | 298 | A:0.95302      | G:0.0469799   |
| chr28           | 9589333 | 2 | 298 | G:0.95302      | A:0.0469799   |
| chr28           | 9590225 | 2 | 310 | G:0.270968     | A:0.729032    |
| chr28           | 9590592 | 2 | 310 | G:0.958065     | T:0.0419355   |
| chr28           | 9590966 | 2 | 300 | A:0.206667     | G:0.793333    |
| chr28           | 9591226 | 3 | 298 | GTA:0.644295   | G:0.191275    |
| GTATATA:0.16443 |         |   |     |                |               |
| chr28           | 9591411 | 2 | 288 | A:0.208333     | T:0.791667    |
| chr28           | 9591551 | 2 | 312 | C:0.964744     | T:0.0352564   |
| chr28           | 9591697 | 2 | 316 | A:0.952532     | C:0.0474684   |
| chr28           | 9591720 | 2 | 314 | C:0.961783     | T:0.0382166   |
| chr28           | 9591912 | 2 | 302 | A:0.953642     | AG:0.0463576  |

|              |         |   |     |                  |                |
|--------------|---------|---|-----|------------------|----------------|
| chr28        | 9591913 | 3 | 302 | AT:0.218543      | A:0.735099     |
| TT:0.0463576 |         |   |     |                  |                |
| chr28        | 9592007 | 2 | 312 | G:0.964744       | A:0.0352564    |
| chr28        | 9592121 | 2 | 310 | C:0.951613       | T:0.0483871    |
| chr28        | 9592682 | 2 | 306 | G:0.862745       | GT:0.137255    |
| chr28        | 9593230 | 2 | 304 | T:0.217105       | C:0.782895     |
| chr28        | 9593310 | 2 | 294 | C:0.955782       | T:0.0442177    |
| chr28        | 9593919 | 2 | 306 | C:0.944444       | G:0.0555556    |
| chr28        | 9593973 | 2 | 312 | T:0.99359        | C:0.00641026   |
| chr28        | 9594038 | 2 | 302 | G:0.953642       | A:0.0463576    |
| chr28        | 9595125 | 2 | 304 | T:0.957237       | C:0.0427632    |
| chr28        | 9595450 | 2 | 312 | G:0.907051       | T:0.0929487    |
| chr28        | 9595656 | 2 | 306 | T:0.947712       | C:0.0522876    |
| chr28        | 9596638 | 2 | 306 | T:0.728758       | C:0.271242     |
| chr28        | 9596694 | 2 | 302 | G:0.94702        | A:0.0529801    |
| chr28        | 9597063 | 2 | 310 | T:0.990323       | C:0.00967742   |
| chr28        | 9599398 | 2 | 292 | A:0.921233       | AT:0.0787671   |
| chr28        | 9599515 | 2 | 308 | C:0.733766       | T:0.266234     |
| chr28        | 9599719 | 2 | 308 | C:0.954545       | T:0.0454545    |
| chr28        | 9599929 | 2 | 296 | G:0.966216       | A:0.0337838    |
| chr28        | 9599962 | 3 | 258 | CT:0.573643      | C:0.162791     |
| CTT:0.263566 |         |   |     |                  |                |
| chr28        | 9600142 | 2 | 304 | G:0.792763       | GAA:0.207237   |
| chr28        | 9600972 | 2 | 314 | G:0.27707        | A:0.72293      |
| chr28        | 9601336 | 2 | 296 | T:0.969595       | C:0.0304054    |
| chr28        | 9601346 | 2 | 276 | G:0.528986       | GTTT:0.471014  |
| chr28        | 9601688 | 2 | 308 | A:0.909091       | T:0.0909091    |
| chr28        | 9601819 | 2 | 318 | C:0.962264       | CT:0.0377358   |
| chr28        | 9602071 | 2 | 306 | G:0.960784       | T:0.0392157    |
| chr28        | 9602515 | 2 | 302 | C:0.698675       | CAGAG:0.301325 |
| chr28        | 9602556 | 2 | 296 | T:0.692568       | C:0.307432     |
| chr28        | 9602709 | 2 | 298 | G:0.959732       | T:0.0402685    |
| chr28        | 9602781 | 2 | 314 | G:0.780255       | A:0.219745     |
| chr28        | 9603071 | 2 | 310 | G:0.958065       | A:0.0419355    |
| chr28        | 9603595 | 2 | 308 | C:0.967532       | T:0.0324675    |
| chr28        | 9603705 | 2 | 312 | CAAATGT:0.939103 | C:0.0608974    |
| chr28        | 9603737 | 2 | 308 | G:0.688312       | A:0.311688     |
| chr28        | 9603866 | 2 | 294 | A:0.942177       | G:0.0578231    |
| chr28        | 9604113 | 2 | 310 | C:0.958065       | CAAT:0.0419355 |
| chr28        | 9604502 | 2 | 312 | C:0.955128       | T:0.0448718    |
| chr28        | 9604526 | 2 | 308 | C:0.253247       | G:0.746753     |
| chr28        | 9604595 | 2 | 298 | A:0.95302        | AT:0.0469799   |
| chr28        | 9604900 | 2 | 308 | C:0.353896       | T:0.646104     |
| chr28        | 9604964 | 2 | 304 | A:0.710526       | AATT:0.289474  |
| chr28        | 9605189 | 2 | 292 | T:0.952055       | C:0.0479452    |
| chr28        | 9605274 | 2 | 292 | C:0.945205       | T:0.0547945    |
| chr28        | 9605900 | 2 | 316 | A:0.977848       | G:0.0221519    |
| chr28        | 9606015 | 2 | 312 | A:0.99359        | G:0.00641026   |
| chr28        | 9606378 | 2 | 306 | A:0.95098        | C:0.0490196    |
| chr28        | 9607071 | 2 | 304 | A:0.375 G:0.625  |                |
| chr28        | 9607195 | 2 | 304 | G:0.953947       | A:0.0460526    |
| chr28        | 9607695 | 2 | 316 | T:0.446203       | TG:0.553797    |
| chr28        | 9608901 | 2 | 312 | C:0.772436       | T:0.227564     |
| chr28        | 9609333 | 2 | 306 | C:0.313725       | T:0.686275     |

|              |         |   |     |                |                |
|--------------|---------|---|-----|----------------|----------------|
| chr28        | 9609384 | 2 | 312 | A:0.987179     | G:0.0128205    |
| chr28        | 9609453 | 2 | 312 | AG:0.971154    | A:0.0288462    |
| chr28        | 9609874 | 2 | 304 | T:0.950658     | C:0.0493421    |
| chr28        | 9609894 | 2 | 300 | G:0.96 A:0.04  |                |
| chr28        | 9609925 | 2 | 304 | C:0.694079     | CAAAT:0.305921 |
| chr28        | 9610424 | 2 | 294 | C:0.952381     | G:0.047619     |
| chr28        | 9610717 | 2 | 304 | T:0.279605     | A:0.720395     |
| chr28        | 9610718 | 3 | 304 | T:0.236842     | A:0.720395     |
| TA:0.0427632 |         |   |     |                |                |
| chr28        | 9610948 | 2 | 306 | A:0.70915      | T:0.29085      |
| chr28        | 9611116 | 2 | 242 | C:0.690083     | CTT:0.309917   |
| chr28        | 9612034 | 2 | 314 | G:0.958599     | A:0.0414013    |
| chr28        | 9612691 | 2 | 310 | G:0.951613     | A:0.0483871    |
| chr28        | 9612988 | 2 | 296 | G:0.956081     | A:0.0439189    |
| chr28        | 9613566 | 2 | 292 | C:0.294521     | CT:0.705479    |
| chr28        | 9614922 | 2 | 314 | ACTTT:0.729299 | A:0.270701     |
| chr28        | 9615103 | 2 | 310 | C:0.941935     | G:0.0580645    |
| chr28        | 9615195 | 3 | 308 | G:0.279221     | GA:0.0876623   |
| GAA:0.633117 |         |   |     |                |                |
| chr28        | 9615206 | 2 | 310 | C:0.948387     | A:0.0516129    |
| chr28        | 9615427 | 2 | 308 | T:0.961039     | C:0.038961     |
| chr28        | 9615564 | 2 | 304 | T:0.322368     | G:0.677632     |
| chr28        | 9616775 | 2 | 310 | A:0.258065     | C:0.741935     |
| chr28        | 9616846 | 2 | 300 | A:0.853333     | C:0.146667     |
| chr28        | 9616922 | 2 | 292 | TA:0.184932    | T:0.815068     |
| chr28        | 9616934 | 2 | 292 | A:0.184932     | C:0.815068     |
| chr28        | 9617161 | 2 | 300 | T:0.906667     | C:0.0933333    |
| chr28        | 9617887 | 2 | 302 | C:0.980132     | T:0.0198675    |
| chr28        | 9618073 | 2 | 300 | A:0.903333     | T:0.0966667    |
| chr28        | 9619536 | 2 | 304 | A:0.944079     | G:0.0559211    |
| chr28        | 9620179 | 2 | 308 | AG:0.659091    | A:0.340909     |
| chr28        | 9620202 | 2 | 312 | G:0.855769     | A:0.144231     |
| chr28        | 9620729 | 2 | 312 | A:0.227564     | T:0.772436     |
| chr28        | 9620950 | 2 | 304 | T:0.671053     | C:0.328947     |
| chr28        | 9621608 | 2 | 310 | C:0.993548     | T:0.00645161   |
| chr28        | 9622738 | 2 | 302 | ATT:0.880795   | A:0.119205     |
| chr28        | 9623784 | 2 | 314 | A:0.219745     | G:0.780255     |
| chr28        | 9623870 | 2 | 314 | A:0.898089     | G:0.101911     |
| chr28        | 9624327 | 2 | 310 | C:0.232258     | T:0.767742     |
| chr28        | 9624715 | 2 | 312 | A:0.320513     | G:0.679487     |
| chr28        | 9625347 | 2 | 304 | T:0.680921     | C:0.319079     |
| chr28        | 9625621 | 2 | 300 | A:0.926667     | G:0.0733333    |
| chr28        | 9626145 | 2 | 312 | TG:0.951923    | T:0.0480769    |
| chr28        | 9626211 | 2 | 306 | T:0.993464     | C:0.00653595   |
| chr28        | 9627016 | 2 | 312 | A:0.942308     | C:0.0576923    |
| chr28        | 9627355 | 2 | 306 | C:0.686275     | A:0.313725     |
| chr28        | 9628345 | 2 | 296 | C:0.300676     | T:0.699324     |
| chr28        | 9629034 | 2 | 306 | A:0.676471     | T:0.323529     |
| chr28        | 9630247 | 2 | 300 | A:0.826667     | AAG:0.173333   |
| chr28        | 9630576 | 2 | 304 | C:0.700658     | CAT:0.299342   |
| chr28        | 9630904 | 2 | 306 | A:0.22549      | G:0.77451      |
| chr28        | 9630930 | 2 | 316 | C:0.96519      | T:0.0348101    |
| chr28        | 9630936 | 2 | 312 | A:0.314103     | T:0.685897     |
| chr28        | 9631549 | 2 | 298 | A:0.681208     | T:0.318792     |

|                                                   |         |   |     |                    |                   |
|---------------------------------------------------|---------|---|-----|--------------------|-------------------|
| chr28                                             | 9632064 | 2 | 306 | CT:0.957516        | C:0.0424837       |
| chr28                                             | 9632137 | 4 | 312 | G:0.483974         | GCATT:0.214744    |
| GCATTCATT:0.192308 GCATTCATTCATT:0.108974         |         |   |     |                    |                   |
| chr28                                             | 9632654 | 2 | 302 | G:0.788079         | A:0.211921        |
| chr28                                             | 9632733 | 2 | 306 | A:0.696078         | ATCTG:0.303922    |
| chr28                                             | 9632756 | 2 | 314 | TGGCTACAG:0.958599 | T:                |
| 0.0414013                                         |         |   |     |                    |                   |
| chr28                                             | 9632783 | 2 | 314 | G:0.828025         | A:0.171975        |
| chr28                                             | 9632961 | 2 | 304 | T:0.986842         | TTTTG:0.0131579   |
| chr28                                             | 9633726 | 2 | 292 | C:0.695205         | T:0.304795        |
| chr28                                             | 9633821 | 2 | 256 | GATTT:0.578125     | G:0.421875        |
| chr28                                             | 9634589 | 2 | 300 | C:0.89 CT:0.11     |                   |
| chr28                                             | 9634607 | 2 | 314 | T:0.305732         | G:0.694268        |
| chr28                                             | 9634619 | 2 | 316 | TTTTG:0.31962      | T:0.68038         |
| chr28                                             | 9634690 | 2 | 296 | G:0.922297         | A:0.0777027       |
| chr28                                             | 9634767 | 2 | 290 | G:0.668966         | A:0.331034        |
| chr28                                             | 9635248 | 2 | 310 | G:0.958065         | T:0.0419355       |
| chr28                                             | 9635437 | 2 | 300 | G:0.976667         | A:0.0233333       |
| chr28                                             | 9635479 | 2 | 300 | G:0.956667         | T:0.0433333       |
| chr28                                             | 9635722 | 2 | 306 | C:0.326797         | T:0.673203        |
| chr28                                             | 9637485 | 2 | 302 | G:0.672185         | A:0.327815        |
| chr28                                             | 9637689 | 2 | 306 | G:0.70915          | A:0.29085         |
| chr28                                             | 9638048 | 2 | 310 | A:0 AT:1           |                   |
| chr28                                             | 9638178 | 3 | 304 | TAA:0.263158       | T:0.0789474       |
| TA:0.657895                                       |         |   |     |                    |                   |
| chr28                                             | 9638628 | 2 | 302 | C:0.791391         | T:0.208609        |
| chr28                                             | 9638765 | 2 | 292 | G:0.280822         | A:0.719178        |
| chr28                                             | 9638891 | 2 | 312 | AT:0.272436        | A:0.727564        |
| chr28                                             | 9638897 | 2 | 312 | T:0.272436         | A:0.727564        |
| chr28                                             | 9638903 | 2 | 304 | TTTTTA:0.911184    | T:0.0888158       |
| chr28                                             | 9638904 | 2 | 304 | TTTTA:0.365132     | T:0.634868        |
| chr28                                             | 9639007 | 2 | 308 | T:0.269481         | C:0.730519        |
| chr28                                             | 9639582 | 2 | 298 | G:0.973154         | A:0.0268456       |
| chr28                                             | 9640520 | 2 | 298 | T:0.963087         | C:0.0369128       |
| chr28                                             | 9640812 | 2 | 300 | C:0.713333         | T:0.286667        |
| chr28                                             | 9640917 | 2 | 300 | A:0.983333         | T:0.0166667       |
| chr28                                             | 9641210 | 2 | 282 | C:0.943262         | T:0.0567376       |
| chr28                                             | 9641320 | 3 | 258 | TAAAAAA:0.321705   | T:                |
| 0.294574 TA:0.383721                              |         |   |     |                    |                   |
| chr28                                             | 9641432 | 2 | 268 | GAT:0.858209       | G:0.141791        |
| chr28                                             | 9641446 | 4 | 316 | T:0.455696         |                   |
| TATATATATATGATGTCATATATATATGATGTCATC:0.227848     |         |   |     |                    |                   |
| TATATATATATATGATGTCATATATATATGATGTCATC:0.193038   |         |   |     |                    |                   |
| TATATATATATATATGATGTCATATATATATGATGTCATC:0.123418 |         |   |     |                    |                   |
| chr28                                             | 9641936 | 2 | 306 | A:0.95098          | G:0.0490196       |
| chr28                                             | 9642104 | 2 | 306 | C:0.267974         | G:0.732026        |
| chr28                                             | 9642174 | 2 | 300 | G:0.306667         | T:0.693333        |
| chr28                                             | 9643130 | 2 | 294 | GA:0.921769        | G:0.0782313       |
| chr28                                             | 9646093 | 2 | 310 | A:0.732258         | G:0.267742        |
| chr28                                             | 9646782 | 2 | 292 | C:0.246575         | CT:0.753425       |
| chr28                                             | 9647574 | 2 | 298 | T:0.271812         | TA:0.728188       |
| chr28                                             | 9647680 | 3 | 314 | A:0.77707          | AGTGTGTGT:0.11465 |
| AGTGTGTGTGT:0.10828                               |         |   |     |                    |                   |
| chr28                                             | 9647845 | 2 | 304 | T:0.680921         | C:0.319079        |



|                             |         |   |     |                   |               |
|-----------------------------|---------|---|-----|-------------------|---------------|
| chr28                       | 9648320 | 2 | 308 | G:0.987013        | A:0.012987    |
| chr28                       | 9648412 | 2 | 304 | C:0.3125 T:0.6875 |               |
| chr28                       | 9648490 | 2 | 310 | C:0.96129         | T:0.0387097   |
| chr28                       | 9648986 | 2 | 302 | A:0.960265        | G:0.0397351   |
| chr28                       | 9649214 | 2 | 312 | A:0.24359         | G:0.75641     |
| chr28                       | 9649446 | 2 | 306 | A:0.777778        | C:0.222222    |
| chr28                       | 9649505 | 2 | 312 | A:0.766026        | G:0.233974    |
| chr28                       | 9650323 | 3 | 266 | G:0.236842        | GTT:0.353383  |
| GTTT:0.409774               |         |   |     |                   |               |
| chr28                       | 9650634 | 2 | 304 | C:0.555921        | A:0.444079    |
| chr28                       | 9650639 | 2 | 306 | T:0.993464        | C:0.00653595  |
| chr28                       | 9651038 | 2 | 302 | T:0.443709        | C:0.556291    |
| chr28                       | 9651083 | 2 | 304 | CTT:0.427632      | C:0.572368    |
| chr28                       | 9651369 | 2 | 304 | A:0.953947        | G:0.0460526   |
| chr28                       | 9651668 | 2 | 312 | T:0.945513        | C:0.0544872   |
| chr28                       | 9651680 | 2 | 316 | G:0.455696        | A:0.544304    |
| chr28                       | 9652019 | 2 | 312 | TGTCA:0.432692    | T:0.567308    |
| chr28                       | 9652056 | 2 | 306 | G:0.954248        | C:0.0457516   |
| chr28                       | 9652957 | 2 | 302 | T:0.44702         | C:0.55298     |
| chr28                       | 9653028 | 2 | 306 | T:0.444444        | C:0.555556    |
| chr28                       | 9653703 | 2 | 312 | T:0.948718        | C:0.0512821   |
| chr28                       | 9653750 | 2 | 302 | A:0.94702         | G:0.0529801   |
| chr28                       | 9653818 | 2 | 304 | T:0.460526        | TTAA:0.539474 |
| chr28                       | 9654143 | 2 | 244 | A:0.47541         | G:0.52459     |
| chr28                       | 9654174 | 2 | 212 | C:0.533019        | T:0.466981    |
| chr28                       | 9654445 | 2 | 222 | G:0.63964         | GC:0.36036    |
| chr28                       | 9654971 | 2 | 302 | A:0.602649        | G:0.397351    |
| chr28                       | 9655006 | 2 | 308 | C:0.464286        | T:0.535714    |
| chr28                       | 9655026 | 2 | 306 | T:0.385621        | C:0.614379    |
| chr28                       | 9655278 | 2 | 316 | T:0.96519         |               |
| TGAGTTACCCCTCACTG:0.0348101 |         |   |     |                   |               |
| chr28                       | 9655280 | 2 | 316 | A:0.623418        |               |
| AGTTACCCCTCACTGGG:0.376582  |         |   |     |                   |               |
| chr28                       | 9655689 | 2 | 292 | C:0.931507        | T:0.0684932   |
| chr28                       | 9655751 | 2 | 286 | C:0.986014        | T:0.013986    |
| chr28                       | 9655846 | 2 | 304 | G:0.940789        | A:0.0592105   |
| chr28                       | 9656111 | 2 | 296 | A:0.993243        | G:0.00675676  |
| chr28                       | 9656180 | 2 | 296 | T:0.432432        | G:0.567568    |
| chr28                       | 9656183 | 2 | 296 | C:0.506757        | CA:0.493243   |
| chr28                       | 9656400 | 2 | 304 | G:0.509868        | A:0.490132    |
| chr28                       | 9656541 | 2 | 306 | A:0.405229        | C:0.594771    |
| chr28                       | 9656548 | 2 | 306 | G:0.493464        | A:0.506536    |
| chr28                       | 9656876 | 2 | 260 | A:0.469231        | T:0.530769    |
| chr28                       | 9657139 | 2 | 206 | T:0.558252        | C:0.441748    |
| chr28                       | 9657309 | 2 | 284 | GT:0.887324       | G:0.112676    |
| chr28                       | 9657397 | 2 | 282 | G:0.950355        | A:0.0496454   |
| chr28                       | 9657624 | 2 | 278 | T:0.147482        | A:0.852518    |
| chr28                       | 9657795 | 2 | 236 | C:0.927966        | A:0.0720339   |
| chr28                       | 9657904 | 2 | 276 | G:0.963768        | A:0.0362319   |
| chr28                       | 9657940 | 2 | 296 | A:0.628378        | AGCATGCAGT:   |
| 0.371622                    |         |   |     |                   |               |
| chr28                       | 9658171 | 2 | 302 | TC:0.980132       | T:0.0198675   |
| chr28                       | 9658397 | 2 | 308 | T:0.548701        | C:0.451299    |
| chr28                       | 9658782 | 2 | 308 | C:0.957792        | T:0.0422078   |

|                            |         |   |     |              |              |
|----------------------------|---------|---|-----|--------------|--------------|
| chr28                      | 9658807 | 2 | 310 | A:0.445161   | T:0.554839   |
| chr28                      | 9659055 | 2 | 288 | A:0.559028   | AGC:0.440972 |
| chr28                      | 9659105 | 2 | 316 | T:0.566456   |              |
| TGCTTCCGCTGTGTCAG:0.433544 |         |   |     |              |              |
| chr28                      | 9659176 | 2 | 310 | G:0.393548   | GA:0.606452  |
| chr28                      | 9659199 | 2 | 314 | A:0.452229   | G:0.547771   |
| chr28                      | 9659205 | 2 | 314 | G:0.452229   | A:0.547771   |
| chr28                      | 9659489 | 2 | 308 | CAA:0.957792 | C:0.0422078  |
| chr28                      | 9659589 | 2 | 300 | C:0.566667   | T:0.433333   |
| chr28                      | 9659647 | 2 | 296 | T:0.418919   | C:0.581081   |
| chr28                      | 9659741 | 2 | 302 | G:0.910596   | A:0.089404   |
| chr28                      | 9659752 | 2 | 302 | T:0.956954   | A:0.0430464  |
| chr28                      | 9659891 | 2 | 290 | G:0.910345   | GC:0.0896552 |
| chr28                      | 9660193 | 2 | 300 | G:0.953333   | T:0.0466667  |
| chr28                      | 9660414 | 2 | 306 | C:0.95098    | T:0.0490196  |
| chr28                      | 9660529 | 2 | 296 | C:0.945946   | T:0.0540541  |
| chr28                      | 9660628 | 2 | 314 | T:0.936306   | G:0.0636943  |
| chr28                      | 9660887 | 2 | 308 | T:0.512987   | C:0.487013   |
| chr28                      | 9661344 | 2 | 298 | G:0.963087   | T:0.0369128  |
| chr28                      | 9661812 | 2 | 282 | C:0.570922   | G:0.429078   |
| chr28                      | 9661982 | 2 | 306 | TAA:0.509804 | T:0.490196   |
| chr28                      | 9661983 | 2 | 306 | A:0.977124   | T:0.0228758  |
| chr28                      | 9662011 | 2 | 300 | C:0.95       | CAG:0.05     |
| chr28                      | 9662101 | 2 | 292 | A:0.534247   | T:0.465753   |
| chr28                      | 9662113 | 2 | 292 | C:0.965753   | T:0.0342466  |
| chr28                      | 9662146 | 2 | 294 | T:0.557823   | C:0.442177   |
| chr28                      | 9662157 | 2 | 294 | G:0.602041   | A:0.397959   |
| chr28                      | 9662260 | 2 | 310 | C:0.951613   | T:0.0483871  |
| chr28                      | 9662584 | 2 | 300 | A:0.486667   | T:0.513333   |
| chr28                      | 9662786 | 2 | 298 | T:0.493289   | C:0.506711   |
| chr28                      | 9662830 | 2 | 306 | C:0.954248   | T:0.0457516  |
| chr28                      | 9663399 | 2 | 300 | C:0.953333   | T:0.0466667  |
| chr28                      | 9663510 | 2 | 300 | A:0.433333   | G:0.566667   |
| chr28                      | 9663899 | 2 | 308 | G:0.594156   | A:0.405844   |
| chr28                      | 9664071 | 2 | 306 | T:0.405229   | C:0.594771   |
| chr28                      | 9664231 | 2 | 304 | T:0.947368   | A:0.0526316  |
| chr28                      | 9664387 | 2 | 310 | G:0.9        | A:0.1        |
| chr28                      | 9664447 | 2 | 306 | G:0.578431   | A:0.421569   |
| chr28                      | 9664638 | 2 | 308 | A:0.396104   | G:0.603896   |
| chr28                      | 9665033 | 2 | 298 | T:0.479866   | C:0.520134   |
| chr28                      | 9665243 | 2 | 302 | G:0.950331   | A:0.0496689  |
| chr28                      | 9665256 | 2 | 300 | C:0.91       | G:0.09       |
| chr28                      | 9665461 | 2 | 300 | G:0.586667   | A:0.413333   |
| chr28                      | 9665513 | 2 | 298 | C:0.986577   | T:0.0134228  |
| chr28                      | 9666121 | 2 | 290 | A:0.417241   | T:0.582759   |
| chr28                      | 9666214 | 2 | 310 | G:0.945161   | A:0.0548387  |
| chr28                      | 9666242 | 2 | 302 | A:0.410596   | G:0.589404   |
| chr28                      | 9666302 | 2 | 302 | T:0.44702    | G:0.55298    |
| chr28                      | 9666472 | 2 | 298 | G:0.503356   | C:0.496644   |
| chr28                      | 9666500 | 2 | 286 | G:0.986014   | A:0.013986   |
| chr28                      | 9666626 | 2 | 256 | C:0.640625   | CT:0.359375  |
| chr28                      | 9666723 | 2 | 310 | C:0.954839   | T:0.0451613  |
| chr28                      | 9666783 | 2 | 304 | C:0.950658   | G:0.0493421  |
| chr28                      | 9666948 | 2 | 298 | G:0.533557   | T:0.466443   |

|                |         |   |     |                 |                  |
|----------------|---------|---|-----|-----------------|------------------|
| chr28          | 9667079 | 2 | 308 | T:0.948052      | C:0.0519481      |
| chr28          | 9667086 | 2 | 308 | C:0.964286      | CCG:0.0357143    |
| chr28          | 9667231 | 2 | 306 | C:0.535948      | A:0.464052       |
| chr28          | 9667505 | 2 | 298 | C:0.604027      | T:0.395973       |
| chr28          | 9667701 | 2 | 296 | C:0.956081      | T:0.0439189      |
| chr28          | 9667996 | 2 | 300 | A:0.6 G:0.4     |                  |
| chr28          | 9668104 | 2 | 300 | C:0.6 T:0.4     |                  |
| chr28          | 9668263 | 2 | 314 | A:0.496815      | G:0.503185       |
| chr28          | 9668410 | 2 | 308 | C:0 CA:1        |                  |
| chr28          | 9668421 | 2 | 308 | TG:0 T:1        |                  |
| chr28          | 9668423 | 2 | 308 | T:0 A:1         |                  |
| chr28          | 9668439 | 2 | 304 | C:0.973684      | T:0.0263158      |
| chr28          | 9668995 | 2 | 308 | G:0.584416      | A:0.415584       |
| chr28          | 9669489 | 2 | 302 | G:0.496689      | A:0.503311       |
| chr28          | 9669533 | 2 | 302 | T:0.94702       | C:0.0529801      |
| chr28          | 9669608 | 2 | 304 | T:0.953947      | C:0.0460526      |
| chr28          | 9669803 | 2 | 296 | T:0.52027       | C:0.47973        |
| chr28          | 9669900 | 2 | 312 | T:0.615385      | TCC:0.384615     |
| chr28          | 9669906 | 3 | 312 | A:0.592949      | AAAAAC:0.0480769 |
| AAAAC:0.358974 |         |   |     |                 |                  |
| chr28          | 9670366 | 2 | 298 | A:0 G:1         |                  |
| chr28          | 9671318 | 2 | 302 | G:0.460265      | A:0.539735       |
| chr28          | 9671397 | 2 | 304 | C:0.375 T:0.625 |                  |
| chr28          | 9671732 | 2 | 304 | A:0.503289      | G:0.496711       |
| chr28          | 9671764 | 2 | 306 | C:0.954248      | T:0.0457516      |
| chr28          | 9671862 | 2 | 316 | T:0.411392      | C:0.588608       |
| chr28          | 9671913 | 2 | 306 | A:0.957516      | G:0.0424837      |
| chr28          | 9671943 | 2 | 308 | A:0.454545      | ACTGT:0.545455   |
| chr28          | 9672157 | 2 | 312 | C:0.951923      | CT:0.0480769     |
| chr28          | 9672165 | 2 | 312 | T:0.50641       | A:0.49359        |
| chr28          | 9672255 | 2 | 298 | T:0.503356      | G:0.496644       |
| chr28          | 9672418 | 2 | 310 | A:0.909677      | G:0.0903226      |
| chr28          | 9672819 | 2 | 298 | C:0.966443      | CT:0.033557      |
| chr28          | 9672838 | 2 | 304 | C:0.582237      | T:0.417763       |
| chr28          | 9672902 | 2 | 278 | A:0.913669      | G:0.0863309      |
| chr28          | 9672992 | 2 | 252 | T:0.912698      | C:0.0873016      |
| chr28          | 9673011 | 2 | 252 | A:0.912698      | C:0.0873016      |
| chr28          | 9673012 | 2 | 236 | T:0.957627      | C:0.0423729      |
| chr28          | 9673119 | 2 | 116 | C:0.793103      | T:0.206897       |
| chr28          | 9673653 | 2 | 234 | CA:0.534188     | C:0.465812       |
| chr28          | 9673654 | 2 | 234 | A:0.752137      | C:0.247863       |
| chr28          | 9673757 | 2 | 280 | C:0.964286      | T:0.0357143      |
| chr28          | 9674395 | 2 | 224 | C:0.700893      | T:0.299107       |
| chr28          | 9674746 | 2 | 312 | G:0.99359       | T:0.00641026     |
| chr28          | 9674957 | 2 | 254 | T:0.692913      | TA:0.307087      |
| chr28          | 9675054 | 2 | 306 | G:0.892157      | GA:0.107843      |
| chr28          | 9675246 | 2 | 306 | C:0.470588      | CT:0.529412      |
| chr28          | 9675392 | 2 | 308 | G:0.935065      | A:0.0649351      |
| chr28          | 9675737 | 2 | 306 | C:0.503268      | T:0.496732       |
| chr28          | 9676395 | 2 | 298 | C:0.949664      | T:0.0503356      |
| chr28          | 9676547 | 2 | 292 | C:0.486301      | T:0.513699       |
| chr28          | 9676732 | 2 | 304 | G:0.496711      | A:0.503289       |
| chr28          | 9676832 | 2 | 306 | T:0.48366       | C:0.51634        |
| chr28          | 9677014 | 2 | 292 | A:0.486301      | G:0.513699       |

|              |               |   |     |                      |                  |
|--------------|---------------|---|-----|----------------------|------------------|
| chr28        | 9677144       | 2 | 298 | A:0.479866           | T:0.520134       |
| chr28        | 9677639       | 2 | 308 | A:0.5 ATTG:0.5       |                  |
| chr28        | 9677825       | 2 | 306 | G:0.496732           | A:0.503268       |
| chr28        | 9677987       | 2 | 308 | G:0.980519           | C:0.0194805      |
| chr28        | 9678142       | 2 | 308 | A:0.50974            | C:0.49026        |
| chr28        | 9678350       | 2 | 312 | C:0.50641            | A:0.49359        |
| chr28        | 9678399       | 2 | 304 | G:0.509868           | A:0.490132       |
| chr28        | 9678745       | 2 | 310 | G:0.970968           | T:0.0290323      |
| chr28        | 9679435       | 2 | 296 | A:0.486486           | G:0.513514       |
| chr28        | 9679624       | 2 | 288 | A:0.975694           | C:0.0243056      |
| chr28        | 9679710       | 2 | 298 | A:0.949664           | G:0.0503356      |
| chr28        | 9680298       | 2 | 306 | C:0.486928           | T:0.513072       |
| chr28        | 9680322       | 2 | 306 | T:0.486928           | C:0.513072       |
| chr28        | 9680453       | 2 | 306 | C:0.571895           | T:0.428105       |
| chr28        | 9680576       | 2 | 308 | C:0.954545           | T:0.0454545      |
| chr28        | 9680940       | 2 | 284 | A:0.507042           | G:0.492958       |
| chr28        | 9681149       | 2 | 298 | G:0.5 A:0.5          |                  |
| chr28        | 9681230       | 2 | 296 | T:0.496622           | C:0.503378       |
| chr28        | 9681350       | 2 | 284 | C:0.485915           | T:0.514085       |
| chr28        | 9681525       | 2 | 312 | C:0.903846           | T:0.0961538      |
| chr28        | 9681616       | 2 | 286 | G:0.493007           | A:0.506993       |
| chr28        | 9682796       | 2 | 304 | A:0.963816           | T:0.0361842      |
| chr28        | 9684073       | 2 | 294 | A:0.962585           | G:0.037415       |
| chr28        | 9684650       | 2 | 298 | G:0.530201           | GTA:0.469799     |
| chr28        | 9684944       | 2 | 292 | T:0.458904           | C:0.541096       |
| chr28        | 9685059       | 2 | 298 | C:0.560403           | CCTCTCT:0.439597 |
| chr28        | 9685108       | 4 | 292 | TAA:0.34589          | T:0.44863        |
| TA:0.0650685 | TAAA:0.140411 |   |     |                      |                  |
| chr28        | 9686194       | 2 | 284 | G:0.538732           | A:0.461268       |
| chr28        | 9687510       | 2 | 302 | G:0.980132           | A:0.0198675      |
| chr28        | 9687764       | 2 | 302 | A:0.437086           | C:0.562914       |
| chr28        | 9688323       | 2 | 292 | C:0.469178           | G:0.530822       |
| chr28        | 9688775       | 2 | 304 | A:0.953947           | G:0.0460526      |
| chr28        | 9690095       | 2 | 312 | A:0.961538           | AAAT:0.0384615   |
| chr28        | 9690750       | 2 | 304 | C:0.963816           | CAG:0.0361842    |
| chr28        | 9691046       | 2 | 312 | T:0.977564           | TAA:0.0224359    |
| chr28        | 9691065       | 2 | 298 | AAAT:0.875839        | A:0.124161       |
| chr28        | 9691066       | 2 | 302 | AAT:0.834437         | A:0.165563       |
| chr28        | 9691068       | 3 | 312 | TAA:0.942308         | T:0.00641026     |
| TA:0.0512821 |               |   |     |                      |                  |
| chr28        | 9691517       | 2 | 304 | T:0.960526           | A:0.0394737      |
| chr28        | 9692141       | 2 | 304 | A:0.960526           | T:0.0394737      |
| chr28        | 9692875       | 2 | 290 | C:0.951724           | T:0.0482759      |
| chr28        | 9693030       | 2 | 294 | C:0.94898            | CG:0.0510204     |
| chr28        | 9693291       | 2 | 284 | G:0.440141           | A:0.559859       |
| chr28        | 9693366       | 2 | 294 | A:0.435374           | G:0.564626       |
| chr28        | 9694301       | 3 | 300 | ACT:0.85 A:0.0866667 | ACTCT:           |
| 0.0633333    |               |   |     |                      |                  |
| chr28        | 9694803       | 2 | 304 | A:0.967105           | C:0.0328947      |
| chr28        | 9695387       | 2 | 174 | TGGGGG:0.408046      | T:0.591954       |
| chr28        | 9696099       | 2 | 308 | G:0.444805           | T:0.555195       |
| chr28        | 9696868       | 2 | 308 | T:0.954545           | C:0.0454545      |
| chr28        | 9696922       | 2 | 306 | C:0.924837           | T:0.0751634      |
| chr28        | 9697041       | 3 | 302 | A:0.304636           | ATTTCTTTC:       |

0.483444 ATTTCTTTCTTTC:0.211921  
 chr28 9697490 2 304 G:0.990132 A:0.00986842  
 chr28 9697717 2 302 A:0.97351 T:0.0264901  
 chr28 9697967 2 288 A:0.46875 AT:0.53125  
 chr28 9698894 2 312 CTTTTTTTTTTTT:0.913462 C:  
 0.0865385  
 chr28 9699500 3 298 G:0.516779 GTT:0.352349  
 GTTT:0.130872  
 chr28 9701740 2 298 G:0.946309 T:0.0536913  
 chr28 9703418 2 310 C:0.512903 T:0.487097  
 chr28 9703677 2 302 T:0.986755 A:0.013245  
 chr28 9704056 2 306 T:0.934641 C:0.0653595  
 chr28 9704171 2 298 G:0.95302 A:0.0469799  
 chr28 9704381 2 302 C:0.960265 T:0.0397351  
 chr28 9704426 2 302 T:0.417219 C:0.582781  
 chr28 9704625 2 298 C:0.949664 T:0.0503356  
 chr28 9704945 2 294 G:0.442177 A:0.557823  
 chr28 9706082 2 308 T:0.5 C:0.5  
 chr28 9706194 2 298 G:0.432886 T:0.567114  
 chr28 9706698 2 312 C:0.426282 T:0.573718  
 chr28 9707018 2 310 C:0.554839 CAG:0.445161  
 chr28 9707475 2 296 T:0.662162 C:0.337838  
 chr28 9708142 2 308 G:0.63961 A:0.36039  
 chr28 9708223 4 318 TAATAAAATAAAATAA:0.147799 T:  
 0.525157 TAATAAAATAA:0.106918 TAATAAAATAAAATAAAATAA:0.220126  
 chr28 9710033 2 294 A:0.0952381 G:0.904762  
 chr28 9710282 3 316 CATAGAT:0.696203 C:0.208861  
 CATAGATATAGAT:0.0949367  
 chr28 9710299 2 316 A:0.911392 ATC:0.0886076  
 chr28 9710301 2 316 A:0.911392 AGATCTAGATC:  
 0.0886076  
 chr28 9710322 2 316 G:0.908228 GATATAGAT:  
 0.0917722  
 chr28 9710326 2 314 G:0.904459 T:0.0955414  
 chr28 9710328 3 316 T:0.806962 G:0.0981013  
 TATAG:0.0949367  
 chr28 9711031 2 310 AGTGT:0.667742 A:0.332258  
 chr28 9711258 2 298 G:0.959732 A:0.0402685  
 chr28 9712579 2 300 T:0.933333 TA:0.0666667  
 chr28 9713224 2 302 C:0.983444 G:0.0165563  
 chr28 9713970 2 292 A:0.561644 G:0.438356  
 chr28 9714649 2 318 CAATTTAATTACTTCAATTAATAA:0.132075  
 C:0.867925  
 chr28 9714674 2 318 A:0.132075 AGG:0.867925  
 chr28 9715061 2 298 T:0.879195 TA:0.120805  
 chr28 9715135 2 306 T:0.944444 A:0.0555556  
 chr28 9715311 2 304 C:0.986842 T:0.0131579  
 chr28 9715329 3 308 TA:0.675325 T:0.217532  
 TAA:0.107143  
 chr28 9715348 2 312 T:0.426282 C:0.573718  
 chr28 9715604 2 298 G:0.45302 T:0.54698  
 chr28 9716009 2 302 G:0.543046 A:0.456954  
 chr28 9716417 2 292 CT:0.59589 C:0.40411  
 chr28 9717522 2 302 G:0.950331 A:0.0496689

chr28 9717530 5 314 ATGTG:0.146497 A:0.286624  
ATG:0.0605096 ATGTGTGTGTG:0.127389 ATGTGTGTGTGTG:0.378981  
chr28 9717732 2 308 C:0.987013 T:0.012987  
chr28 9717766 2 302 ACT:0.456954 A:0.543046  
chr28 9718146 2 302 T:0.546358 C:0.453642  
chr28 9718514 2 306 A:0.447712 G:0.552288  
chr28 9718616 2 258 TA:0.689922 T:0.310078  
chr28 9718710 2 294 A:0.438776 C:0.561224  
chr28 9719127 2 302 G:0.57947 T:0.42053  
chr28 9719292 2 300 C:0.436667 T:0.563333  
chr28 9719408 2 306 G:0.960784 A:0.0392157  
chr28 9719755 2 306 A:0.69281 C:0.30719  
chr28 9720134 2 304 C:0.960526 T:0.0394737  
chr28 9721639 2 290 T:0.5 C:0.5  
chr28 9721686 2 300 C:0.993333 T:0.00666667  
chr28 9721729 2 298 C:0.52349 T:0.47651  
chr28 9722300 2 306 C:0.46732 T:0.53268  
chr28 9722335 2 302 C:0.533113 T:0.466887  
chr28 9722472 2 306 G:0.95098 A:0.0490196  
chr28 9722667 2 294 A:0.517007 C:0.482993  
chr28 9722668 2 292 GT:0.643836 G:0.356164  
chr28 9722959 2 300 C:0.976667 T:0.0233333  
chr28 9723206 2 272 A:0.985294 G:0.0147059  
chr28 9723630 2 294 G:0.503401 A:0.496599  
chr28 9723919 2 302 C:0.509934 G:0.490066  
chr28 9723997 2 302 G:0.476821 A:0.523179  
chr28 9724006 2 310 A:0.990323 G:0.00967742  
chr28 9724574 2 306 G:0.977124 C:0.0228758  
chr28 9724633 2 302 T:0.980132 C:0.0198675  
chr28 9724744 2 308 C:0.983766 T:0.0162338  
chr28 9724827 2 300 A:0.986667 G:0.0133333  
chr28 9724894 2 296 T:0.983108 C:0.0168919  
chr28 9724895 2 296 T:0.983108 C:0.0168919  
chr28 9725235 2 318 A:0.990566 AC:0.00943396  
chr28 9725236 2 318 A:0.990566 T:0.00943396  
chr28 9725255 2 318 T:0.990566 C:0.00943396  
chr28 9725275 2 318 T:0.990566 C:0.00943396  
chr28 9725447 2 302 T:0.986755 G:0.013245  
chr28 9725570 2 302 G:0.460265 A:0.539735  
chr28 9725663 2 300 G:0.986667 A:0.0133333  
chr28 9725823 2 304 T:0.986842 C:0.0131579  
chr28 9725868 2 308 TG:0.626623 T:0.373377  
chr28 9725883 2 300 A:0.986667 C:0.0133333  
chr28 9725982 2 304 T:0.990132 C:0.00986842  
chr28 9726140 2 300 CT:0.91 C:0.09  
chr28 9726488 2 302 T:0.94702 C:0.0529801  
chr28 9726505 2 300 TA:0.466667 T:0.533333  
chr28 9727078 2 302 T:0.466887 C:0.533113  
chr28 9727823 2 302 C:0.960265 T:0.0397351  
chr28 9727831 2 310 AAAACGT:0.470968 A:0.529032  
chr28 9728288 2 310 T:0.519355 C:0.480645  
chr28 9728361 2 308 A:0.896104 T:0.103896  
chr28 9728491 2 304 T:0.467105 G:0.532895  
chr28 9729023 2 300 G:0.613333 A:0.386667

|                            |                |   |                         |                    |               |
|----------------------------|----------------|---|-------------------------|--------------------|---------------|
| chr28                      | 9729591        | 4 | 318                     | TAATGAATG:0.191824 | T:            |
| 0.235849                   | TAATG:0.534591 |   | TAATGAATGAATG:0.0377358 |                    |               |
| chr28                      | 9730419        | 2 | 304                     | T:0.638158         | A:0.361842    |
| chr28                      | 9730820        | 2 | 306                     | T:0.0882353        | C:0.911765    |
| chr28                      | 9730882        | 2 | 308                     | T:0.883117         | C:0.116883    |
| chr28                      | 9731081        | 2 | 296                     | C:0.530405         | T:0.469595    |
| chr28                      | 9731210        | 2 | 312                     | A:0.974359         | AT:0.025641   |
| chr28                      | 9731212        | 2 | 312                     | A:0.974359         | T:0.025641    |
| chr28                      | 9731223        | 2 | 306                     | GAT:0.464052       | G:0.535948    |
| chr28                      | 9731276        | 2 | 304                     | C:0.532895         | T:0.467105    |
| chr28                      | 9731289        | 2 | 304                     | T:0.532895         | G:0.467105    |
| chr28                      | 9731315        | 2 | 306                     | CAAT:0.513072      | C:0.486928    |
| chr28                      | 9731461        | 2 | 308                     | C:0.538961         | T:0.461039    |
| chr28                      | 9731643        | 2 | 306                     | A:0.620915         | G:0.379085    |
| chr28                      | 9731646        | 2 | 306                     | G:0.957516         | A:0.0424837   |
| chr28                      | 9732250        | 2 | 302                     | C:0.834437         | G:0.165563    |
| chr28                      | 9732289        | 2 | 310                     | TCC:0.629032       | T:0.370968    |
| chr28                      | 9732713        | 2 | 300                     | A:0.63 C:0.37      |               |
| chr28                      | 9732824        | 2 | 310                     | C:0.919355         |               |
| CTATATATAACTATA:0.0806452  |                |   |                         |                    |               |
| chr28                      | 9733050        | 2 | 308                     | C:0.886364         | T:0.113636    |
| chr28                      | 9733070        | 2 | 308                     | A:0.636364         | G:0.363636    |
| chr28                      | 9733084        | 2 | 306                     | C:0.885621         | T:0.114379    |
| chr28                      | 9733147        | 2 | 286                     | T:0.888112         | A:0.111888    |
| chr28                      | 9733150        | 2 | 286                     | C:0.888112         | T:0.111888    |
| chr28                      | 9733564        | 2 | 306                     | G:0.643791         | A:0.356209    |
| chr28                      | 9733818        | 2 | 304                     | CAGAA:0.641447     | C:0.358553    |
| chr28                      | 9733823        | 2 | 304                     | A:0.641447         | C:0.358553    |
| chr28                      | 9733861        | 2 | 296                     | A:0.986486         | G:0.0135135   |
| chr28                      | 9734028        | 2 | 296                     | T:0.469595         | C:0.530405    |
| chr28                      | 9734239        | 2 | 312                     | T:0.323718         | C:0.676282    |
| chr28                      | 9734628        | 3 | 306                     | G:0.20915          | GTC:0.379085  |
| GTCTC:0.411765             |                |   |                         |                    |               |
| chr28                      | 9734706        | 2 | 298                     | A:0.627517         | T:0.372483    |
| chr28                      | 9734721        | 3 | 292                     | CAA:0.482877       | C:0.373288    |
| CAAA:0.143836              |                |   |                         |                    |               |
| chr28                      | 9734868        | 2 | 292                     | G:0.787671         | C:0.212329    |
| chr28                      | 9736579        | 2 | 302                     | A:0.662252         | G:0.337748    |
| chr28                      | 9736608        | 2 | 288                     | A:0.996528         | T:0.00347222  |
| chr28                      | 9736672        | 2 | 268                     | T:0.656716         | TAAG:0.343284 |
| chr28                      | 9736841        | 2 | 292                     | A:0.356164         | G:0.643836    |
| chr28                      | 9737006        | 4 | 314                     | A:0.292994         | ATG:0.226115  |
| ATGTGTGTGTGTGTGTG:0.286624 |                |   |                         |                    |               |
| chr28                      | 9737028        | 2 | 290                     | A:0.365517         | ATT:0.634483  |
| chr28                      | 9737409        | 2 | 300                     | T:0.35 C:0.65      |               |
| chr28                      | 9737548        | 3 | 296                     | GT:0.307432        | G:0.621622    |
| GTT:0.0709459              |                |   |                         |                    |               |
| chr28                      | 9737645        | 2 | 300                     | A:0.343333         | C:0.656667    |
| chr28                      | 9737667        | 2 | 298                     | C:0.661074         | T:0.338926    |
| chr28                      | 9737805        | 2 | 308                     | A:0.350649         | G:0.649351    |
| chr28                      | 9737930        | 2 | 300                     | T:0.793333         | C:0.206667    |
| chr28                      | 9738289        | 2 | 302                     | CA:0.837748        | C:0.162252    |
| chr28                      | 9738986        | 2 | 292                     | T:0.84589          | C:0.15411     |
| chr28                      | 9739027        | 2 | 282                     | G:0.815603         | A:0.184397    |

|                        |         |   |     |                |               |
|------------------------|---------|---|-----|----------------|---------------|
| chr28                  | 9739349 | 2 | 310 | G:0.796774     | A:0.203226    |
| chr28                  | 9739370 | 2 | 310 | T:0.796774     | C:0.203226    |
| chr28                  | 9739420 | 2 | 312 | C:0.782051     | T:0.217949    |
| chr28                  | 9739441 | 2 | 312 | T:0.782051     | C:0.217949    |
| chr28                  | 9739464 | 2 | 312 | T:0.782051     | C:0.217949    |
| chr28                  | 9739475 | 2 | 312 | G:0.782051     | A:0.217949    |
| chr28                  | 9739585 | 2 | 304 | C:0.796053     | T:0.203947    |
| chr28                  | 9739593 | 2 | 308 | G:0.948052     | A:0.0519481   |
| chr28                  | 9739661 | 2 | 304 | C:0.654605     | T:0.345395    |
| chr28                  | 9739683 | 2 | 296 | G:0.814189     | T:0.185811    |
| chr28                  | 9739715 | 3 | 304 | A:0.861842     | C:0.105263    |
| T:0.0328947            |         |   |     |                |               |
| chr28                  | 9739815 | 2 | 314 | G:0.821656     | A:0.178344    |
| chr28                  | 9739860 | 2 | 304 | C:0.825658     | T:0.174342    |
| chr28                  | 9739865 | 2 | 304 | C:0.825658     | G:0.174342    |
| chr28                  | 9739866 | 2 | 302 | A:0.887417     | G:0.112583    |
| chr28                  | 9739947 | 2 | 304 | G:0.828947     | C:0.171053    |
| chr28                  | 9740055 | 2 | 304 | G:0.164474     | A:0.835526    |
| chr28                  | 9740120 | 2 | 308 | C:0.827922     | T:0.172078    |
| chr28                  | 9740234 | 2 | 290 | G:0.351724     | A:0.648276    |
| chr28                  | 9740295 | 2 | 292 | C:0.945205     | T:0.0547945   |
| chr28                  | 9740534 | 2 | 308 | G:0.941558     | A:0.0584416   |
| chr28                  | 9740867 | 2 | 298 | G:0.35906      | A:0.64094     |
| chr28                  | 9740886 | 2 | 308 | C:0.788961     | T:0.211039    |
| chr28                  | 9740999 | 2 | 306 | CT:0.954248    | C:0.0457516   |
| chr28                  | 9741008 | 4 | 300 | GT:0.176667    | G:0.636667    |
| GTT:0.136667 GTTT:0.05 |         |   |     |                |               |
| chr28                  | 9741185 | 2 | 308 | TCTC:0.795455  | T:0.204545    |
| chr28                  | 9741427 | 2 | 306 | TTC:0.79085    | T:0.20915     |
| chr28                  | 9741441 | 2 | 306 | T:0.79085      | C:0.20915     |
| chr28                  | 9741450 | 2 | 306 | T:0.79085      | C:0.20915     |
| chr28                  | 9741626 | 2 | 298 | A:0.795302     | C:0.204698    |
| chr28                  | 9741663 | 2 | 296 | G:0.601351     | A:0.398649    |
| chr28                  | 9741924 | 2 | 308 | G:0.801948     | A:0.198052    |
| chr28                  | 9741942 | 2 | 310 | AATTG:0.974194 | A:0.0258065   |
| chr28                  | 9742027 | 2 | 292 | T:0.109589     | C:0.890411    |
| chr28                  | 9742045 | 2 | 298 | C:0.818792     | T:0.181208    |
| chr28                  | 9742095 | 2 | 304 | A:0.809211     | AT:0.190789   |
| chr28                  | 9742175 | 2 | 306 | G:0.0980392    | A:0.901961    |
| chr28                  | 9742286 | 2 | 302 | C:0.798013     | T:0.201987    |
| chr28                  | 9742324 | 2 | 302 | C:0.804636     | T:0.195364    |
| chr28                  | 9742332 | 2 | 304 | A:0.657895     | G:0.342105    |
| chr28                  | 9742394 | 2 | 306 | G:0.79085      | A:0.20915     |
| chr28                  | 9742571 | 2 | 304 | G:0.878289     | A:0.121711    |
| chr28                  | 9742760 | 2 | 302 | T:0.678808     | G:0.321192    |
| chr28                  | 9742857 | 2 | 306 | G:0.80719      | C:0.19281     |
| chr28                  | 9743064 | 2 | 310 | T:0.809677     | A:0.190323    |
| chr28                  | 9743116 | 2 | 306 | T:0.816993     | TA:0.183007   |
| chr28                  | 9743160 | 2 | 300 | C:0.806667     | A:0.193333    |
| chr28                  | 9743176 | 2 | 302 | A:0.807947     | C:0.192053    |
| chr28                  | 9743185 | 2 | 302 | G:0.63245      | A:0.36755     |
| chr28                  | 9743202 | 2 | 306 | A:0.803922     | G:0.196078    |
| chr28                  | 9743328 | 2 | 316 | T:0.696203     | C:0.303797    |
| chr28                  | 9743590 | 2 | 320 | G:0.94375      | GGGAT:0.05625 |



|                         |                        |   |     |                 |                   |
|-------------------------|------------------------|---|-----|-----------------|-------------------|
| chr28                   | 9743591                | 4 | 320 | GGATAGATA:0.625 | G:0.065625        |
| GGATA:0.21875           | GGATAGATAGATA:0.090625 |   |     |                 |                   |
| chr28                   | 9743595                | 2 | 316 | A:0.981013      | G:0.0189873       |
| chr28                   | 9743634                | 3 | 320 | T:0.83125       | TAGATAG:0.059375  |
| TGATAGATAGATAG:0.109375 |                        |   |     |                 |                   |
| chr28                   | 9743837                | 2 | 298 | G:0.95302       | C:0.0469799       |
| chr28                   | 9743838                | 2 | 298 | T:0.64094       | C:0.35906         |
| chr28                   | 9743960                | 2 | 298 | A:0.338926      | T:0.661074        |
| chr28                   | 9744247                | 2 | 308 | C:0.75 A:0.25   |                   |
| chr28                   | 9744622                | 2 | 300 | A:0.776667      | G:0.223333        |
| chr28                   | 9744849                | 2 | 310 | G:0.76129       | A:0.23871         |
| chr28                   | 9745014                | 2 | 306 | G:0.764706      | T:0.235294        |
| chr28                   | 9745028                | 2 | 306 | T:0.95098       | TA:0.0490196      |
| chr28                   | 9745205                | 2 | 302 | C:0.983444      | T:0.0165563       |
| chr28                   | 9745251                | 2 | 312 | T:0.740385      | C:0.259615        |
| chr28                   | 9745261                | 2 | 312 | G:0.740385      | A:0.259615        |
| chr28                   | 9745314                | 2 | 306 | G:0.960784      | A:0.0392157       |
| chr28                   | 9746163                | 2 | 302 | T:0.483444      | G:0.516556        |
| chr28                   | 9746181                | 2 | 310 | C:0.490323      | T:0.509677        |
| chr28                   | 9746220                | 2 | 312 | C:0.49359       | T:0.50641         |
| chr28                   | 9746611                | 2 | 294 | TC:0.952381     | T:0.047619        |
| chr28                   | 9746612                | 2 | 294 | C:0.506803      | T:0.493197        |
| chr28                   | 9746758                | 2 | 304 | T:0.953947      | C:0.0460526       |
| chr28                   | 9747095                | 2 | 290 | T:0.941379      | TAC:0.0586207     |
| chr28                   | 9747240                | 2 | 316 | TC:0.898734     | T:0.101266        |
| chr28                   | 9747525                | 2 | 300 | A:0.92 T:0.08   |                   |
| chr28                   | 9747633                | 2 | 284 | C:0.96831       | T:0.0316901       |
| chr28                   | 9747866                | 2 | 300 | C:0.333333      | T:0.666667        |
| chr28                   | 9747984                | 2 | 300 | A:0.12 G:0.88   |                   |
| chr28                   | 9748265                | 2 | 308 | G:0.938312      | A:0.0616883       |
| chr28                   | 9748530                | 2 | 302 | G:0.503311      | A:0.496689        |
| chr28                   | 9749203                | 2 | 306 | A:0.901961      | G:0.0980392       |
| chr28                   | 9749315                | 2 | 286 | C:0.933566      | CT:0.0664336      |
| chr28                   | 9749494                | 2 | 308 | A:0.373377      | G:0.626623        |
| chr28                   | 9749795                | 2 | 290 | A:0.22069       | G:0.77931         |
| chr28                   | 9749831                | 2 | 294 | GC:0.261905     | G:0.738095        |
| chr28                   | 9750270                | 2 | 304 | G:0.953947      | C:0.0460526       |
| chr28                   | 9750347                | 2 | 302 | A:0.0960265     | C:0.903974        |
| chr28                   | 9750948                | 2 | 300 | A:0.123333      | G:0.876667        |
| chr28                   | 9751061                | 2 | 290 | C:0.910345      | G:0.0896552       |
| chr28                   | 9751265                | 2 | 300 | C:0.95 T:0.05   |                   |
| chr28                   | 9751372                | 2 | 292 | C:0.958904      | T:0.0410959       |
| chr28                   | 9751465                | 4 | 298 | AT:0.677852     | A:0.11745         |
| ATT:0.0738255           | ATTTT:0.130872         |   |     |                 |                   |
| chr28                   | 9752140                | 3 | 290 | C:0.303448      | CTG:0.558621      |
| CTGTG:0.137931          |                        |   |     |                 |                   |
| chr28                   | 9752675                | 2 | 312 | G:0.945513      | A:0.0544872       |
| chr28                   | 9752676                | 2 | 312 | A:0.945513      | G:0.0544872       |
| chr28                   | 9753535                | 2 | 290 | C:0.382759      | A:0.617241        |
| chr28                   | 9753816                | 2 | 294 | G:0.336735      | A:0.663265        |
| chr28                   | 9754192                | 2 | 294 | T:0.673469      | C:0.326531        |
| chr28                   | 9754329                | 2 | 302 | T:0.31457       | C:0.68543         |
| chr28                   | 9754954                | 2 | 316 | T:0.968354      | TTTTTTA:0.0316456 |
| chr28                   | 9754961                | 2 | 316 | A:0.968354      |                   |

ATTTATTTTTTTTTTAAATTT:0.0316456  
 chr28 9755512 2 298 G:0.889262 A:0.110738  
 chr28 9755568 2 308 C:0.444805 A:0.555195  
 chr28 9755764 2 280 G:0.4 T:0.6  
 chr28 9755816 2 296 A:0.439189 G:0.560811  
 chr28 9755909 2 298 CAAATAATAATAATAATAA:0.946309  
 C:0.0536913  
 chr28 9755910 6 312 AAATAATAATAATAAT:0.272436 A:  
 0.0608974 AAAT:0.0416667 AAATAAT:0.221154 AAATAATAAT:  
 0.198718 AAATAATAATAAT:0.205128  
 chr28 9756064 2 274 A:0.412409 G:0.587591  
 chr28 9756106 2 278 C:0.442446 G:0.557554  
 chr28 9756139 2 310 T:0.922581 TA:0.0774194  
 chr28 9756756 2 300 A:0.94 G:0.06  
 chr28 9756881 2 302 A:0.453642 G:0.546358  
 chr28 9757016 2 306 C:0.398693 G:0.601307  
 chr28 9757207 2 314 T:0.929936 A:0.0700637  
 chr28 9757230 2 310 C:0.877419 T:0.122581  
 chr28 9757270 2 320 TCCTTCTCTCC:0.9375 T:0.0625  
 chr28 9757282 2 320 T:0.9375 G:0.0625  
 chr28 9757346 2 320 TTCTCTCCATAAGTAATGATC:0.9375  
 T:0.0625  
 chr28 9757454 2 298 C:0.416107 T:0.583893  
 chr28 9757710 2 296 A:0.956081 G:0.0439189  
 chr28 9758156 2 296 C:0.344595 CTTTTTTTT:  
 0.655405  
 chr28 9758433 2 304 TA:0.256579 T:0.743421  
 chr28 9758746 2 304 T:0.463816 A:0.536184  
 chr28 9758811 2 300 C:0.893333 T:0.106667  
 chr28 9759090 2 306 GA:0.931373 G:0.0686275  
 chr28 9759127 2 308 G:0.821429 GAA:0.178571  
 chr28 9759435 2 296 G:0.847973 C:0.152027  
 chr28 9759494 2 246 T:0.0528455 TAA:0.947154  
 chr28 9759580 2 300 C:0.816667 A:0.183333  
 chr28 9759649 2 296 T:0.841216 C:0.158784  
 chr28 9759874 2 296 T:0.847973 C:0.152027  
 chr28 9759938 2 304 A:0.243421 G:0.756579  
 chr28 9759994 2 294 G:0.840136 A:0.159864  
 chr28 9760373 2 304 T:0.838816 C:0.161184  
 chr28 9760542 2 294 G:0.836735 A:0.163265  
 chr28 9760660 2 298 C:0.92953 T:0.0704698  
 chr28 9761086 2 296 GA:0.891892 G:0.108108  
 chr28 9761098 2 298 A:0.949664 C:0.0503356  
 chr28 9761245 2 284 C:0.795775 CCT:0.204225  
 chr28 9761552 2 314 T:0.83121 G:0.16879  
 chr28 9761728 2 304 G:0.486842 GT:0.513158  
 chr28 9762479 2 302 TG:0.834437 T:0.165563  
 chr28 9762767 2 308 AAG:0.970779 A:0.0292208  
 chr28 9763333 2 306 A:0.95098 T:0.0490196  
 chr28 9763478 2 312 C:0.163462 T:0.836538  
 chr28 9763486 2 312 T:0.11859 C:0.88141  
 chr28 9764176 2 296 C:0.14527 G:0.85473  
 chr28 9764669 2 298 G:0.16443 C:0.83557  
 chr28 9764759 2 318 G:0.95283

GAAATACAGATGTCAAAAAAAAAAAAAA:0.0471698

|                     |         |   |     |                              |                 |
|---------------------|---------|---|-----|------------------------------|-----------------|
| chr28               | 9765181 | 2 | 300 | C:0.91                       | T:0.09          |
| chr28               | 9765523 | 2 | 298 | T:0                          | G:1             |
| chr28               | 9765634 | 2 | 300 | C:0.706667                   | G:0.293333      |
| chr28               | 9765903 | 2 | 298 | C:0.939597                   | T:0.0604027     |
| chr28               | 9766373 | 2 | 230 | T:0.730435                   | C:0.269565      |
| chr28               | 9766593 | 2 | 302 | GAGAAAGAAAAGAAGAAAGAAAGAAGA: |                 |
| 0.274834 G:0.725166 |         |   |     |                              |                 |
| chr28               | 9766676 | 2 | 296 | AAG:0.304054                 | A:0.695946      |
| chr28               | 9766683 | 2 | 296 | G:0.304054                   | GA:0.695946     |
| chr28               | 9766993 | 2 | 308 | G:0.25974                    | A:0.74026       |
| chr28               | 9767153 | 2 | 304 | C:0.950658                   | T:0.0493421     |
| chr28               | 9767192 | 2 | 294 | T:0.894558                   | C:0.105442      |
| chr28               | 9767386 | 2 | 306 | T:0.95098                    | TTAGA:0.0490196 |
| chr28               | 9767447 | 2 | 308 | T:0.253247                   | C:0.746753      |
| chr28               | 9767480 | 2 | 302 | G:0.735099                   | C:0.264901      |
| chr28               | 9767673 | 2 | 314 | G:0.738854                   | A:0.261146      |
| chr28               | 9768353 | 2 | 302 | A:0.258278                   | G:0.741722      |
| chr28               | 9768697 | 2 | 306 | C:0.434641                   | T:0.565359      |
| chr28               | 9769049 | 2 | 302 | A:0.490066                   | AT:0.509934     |
| chr28               | 9769050 | 2 | 300 | T:0.953333                   | TA:0.0466667    |
| chr28               | 9770759 | 2 | 304 | G:0.953947                   | C:0.0460526     |
| chr28               | 9771167 | 2 | 308 | C:0.542208                   | T:0.457792      |
| chr28               | 9771342 | 2 | 302 | C:0.456954                   | T:0.543046      |
| chr28               | 9771538 | 2 | 298 | T:0.627517                   | TA:0.372483     |
| chr28               | 9771702 | 2 | 306 | C:0.69281                    | T:0.30719       |
| chr28               | 9771730 | 2 | 308 | A:0.396104                   | G:0.603896      |
| chr28               | 9772152 | 2 | 300 | G:0.623333                   | T:0.376667      |
| chr28               | 9772348 | 2 | 302 | A:0.599338                   | G:0.400662      |
| chr28               | 9772580 | 2 | 306 | A:0.598039                   | G:0.401961      |
| chr28               | 9772908 | 2 | 306 | T:0.611111                   | C:0.388889      |
| chr28               | 9772982 | 2 | 314 | ATG:0.627389                 | A:0.372611      |
| chr28               | 9772985 | 2 | 314 | CCAGTGTAA:0.627389           | C:              |
| 0.372611            |         |   |     |                              |                 |
| chr28               | 9773464 | 2 | 300 | C:0.65                       | T:0.35          |
| chr28               | 9773787 | 2 | 292 | A:0.599315                   | G:0.400685      |
| chr28               | 9773853 | 2 | 288 | A:0.604167                   | G:0.395833      |
| chr28               | 9773867 | 2 | 294 | C:0.608844                   | T:0.391156      |
| chr28               | 9774139 | 2 | 300 | G:0.8                        | A:0.2           |
| chr28               | 9774505 | 2 | 310 | A:0.664516                   | G:0.335484      |
| chr28               | 9774726 | 2 | 306 | C:0.457516                   | T:0.542484      |
| chr28               | 9774815 | 2 | 302 | C:0.847682                   | T:0.152318      |
| chr28               | 9775141 | 2 | 306 | G:0.519608                   | A:0.480392      |
| chr28               | 9775184 | 2 | 302 | T:0.953642                   | TC:0.0463576    |
| chr28               | 9775707 | 2 | 302 | C:0.612583                   | T:0.387417      |
| chr28               | 9775881 | 2 | 304 | G:0.618421                   | GAA:0.381579    |
| chr28               | 9776378 | 2 | 294 | T:0.469388                   | C:0.530612      |
| chr28               | 9776533 | 2 | 304 | C:0.513158                   | T:0.486842      |
| chr28               | 9776550 | 2 | 300 | T:0.836667                   | TC:0.163333     |
| chr28               | 9777051 | 2 | 304 | G:0.842105                   | A:0.157895      |
| chr28               | 9777185 | 2 | 308 | G:0.636364                   | C:0.363636      |
| chr28               | 9777308 | 2 | 302 | T:0.625828                   | C:0.374172      |
| chr28               | 9777424 | 2 | 298 | T:0.64094                    | C:0.35906       |
| chr28               | 9777623 | 2 | 308 | T:0.623377                   | C:0.376623      |

|       |         |   |     |             |              |
|-------|---------|---|-----|-------------|--------------|
| chr28 | 9777957 | 2 | 306 | C:0.970588  | A:0.0294118  |
| chr28 | 9777990 | 2 | 302 | T:0.615894  | A:0.384106   |
| chr28 | 9778333 | 2 | 302 | C:0.874172  | T:0.125828   |
| chr28 | 9778511 | 2 | 302 | C:0.619205  | T:0.380795   |
| chr28 | 9778650 | 2 | 310 | CT:0.629032 | C:0.370968   |
| chr28 | 9778713 | 2 | 306 | T:0.513072  | G:0.486928   |
| chr28 | 9779028 | 2 | 302 | A:0.400662  | G:0.599338   |
| chr28 | 9779184 | 2 | 302 | A:0.125828  | G:0.874172   |
| chr28 | 9779188 | 2 | 306 | A:0.905229  | G:0.0947712  |
| chr28 | 9779472 | 2 | 300 | C:0.976667  | T:0.0233333  |
| chr28 | 9779502 | 2 | 304 | G:0.473684  | A:0.526316   |
| chr28 | 9779585 | 2 | 304 | G:0.898026  | A:0.101974   |
| chr28 | 9779744 | 2 | 300 | G:0.943333  | A:0.0566667  |
| chr28 | 9779765 | 2 | 306 | C:0.529412  | T:0.470588   |
| chr28 | 9779849 | 2 | 298 | G:0.114094  | C:0.885906   |
| chr28 | 9779986 | 2 | 300 | C:0.9       | G:0.1        |
| chr28 | 9780107 | 2 | 294 | T:0.721088  | C:0.278912   |
| chr28 | 9780582 | 2 | 234 | GAAAA:0     | G:1          |
| chr28 | 9780586 | 2 | 234 | A:0         | AGGCGC:1     |
| chr28 | 9781109 | 2 | 236 | CT:0.567797 | C:0.432203   |
| chr28 | 9781370 | 2 | 284 | G:0.556338  | A:0.443662   |
| chr28 | 9781580 | 2 | 302 | T:0.34106   | C:0.65894    |
| chr28 | 9781610 | 2 | 292 | A:0.311644  | G:0.688356   |
| chr28 | 9781893 | 2 | 300 | C:0.576667  | T:0.423333   |
| chr28 | 9782443 | 2 | 294 | T:0.591837  | G:0.408163   |
| chr28 | 9782499 | 2 | 294 | G:0.761905  | A:0.238095   |
| chr28 | 9782808 | 2 | 194 | A:0.778351  | T:0.221649   |
| chr28 | 9782809 | 2 | 194 | C:0.778351  | A:0.221649   |
| chr28 | 9782819 | 2 | 178 | G:0.578652  | T:0.421348   |
| chr28 | 9782979 | 2 | 260 | C:0.792308  | T:0.207692   |
| chr28 | 9783183 | 2 | 300 | C:0         | G:1          |
| chr28 | 9783199 | 2 | 300 | T:0.776667  | C:0.223333   |
| chr28 | 9783448 | 2 | 288 | T:0.565972  | C:0.434028   |
| chr28 | 9783582 | 2 | 302 | C:0.764901  | A:0.235099   |
| chr28 | 9783784 | 2 | 302 | A:0.774834  | G:0.225166   |
| chr28 | 9783843 | 2 | 302 | G:0.34106   | T:0.65894    |
| chr28 | 9783881 | 2 | 306 | T:0.336601  | G:0.663399   |
| chr28 | 9784009 | 2 | 312 | G:0.310897  | C:0.689103   |
| chr28 | 9784056 | 2 | 308 | G:0.584416  | A:0.415584   |
| chr28 | 9784260 | 2 | 294 | C:0.581633  | T:0.418367   |
| chr28 | 9784474 | 2 | 292 | T:0.756849  | C:0.243151   |
| chr28 | 9784506 | 2 | 292 | C:0.585616  | T:0.414384   |
| chr28 | 9784586 | 2 | 302 | C:0.983444  | G:0.0165563  |
| chr28 | 9784588 | 2 | 300 | G:0.576667  | A:0.423333   |
| chr28 | 9784622 | 2 | 292 | T:0.777397  | C:0.222603   |
| chr28 | 9784780 | 2 | 306 | T:0.764706  | G:0.235294   |
| chr28 | 9785095 | 2 | 292 | C:0.773973  | A:0.226027   |
| chr28 | 9785624 | 2 | 300 | C:0.77      | T:0.23       |
| chr28 | 9785777 | 2 | 300 | T:0.77      | C:0.23       |
| chr28 | 9785850 | 2 | 304 | G:0.779605  | A:0.220395   |
| chr28 | 9785965 | 2 | 306 | T:0.650327  | G:0.349673   |
| chr28 | 9786023 | 2 | 308 | G:0.993506  | A:0.00649351 |
| chr28 | 9786138 | 2 | 286 | A:0.636364  | G:0.363636   |
| chr28 | 9786603 | 2 | 306 | G:0.764706  | T:0.235294   |

|       |         |   |     |             |                |
|-------|---------|---|-----|-------------|----------------|
| chr28 | 9786794 | 2 | 296 | G:0.77027   | A:0.22973      |
| chr28 | 9786881 | 2 | 304 | C:0.746711  | T:0.253289     |
| chr28 | 9786990 | 2 | 294 | C:0.697279  | T:0.302721     |
| chr28 | 9787175 | 2 | 296 | A:0.743243  | G:0.256757     |
| chr28 | 9787339 | 2 | 300 | C:0.763333  | T:0.236667     |
| chr28 | 9787422 | 2 | 296 | T:0.763514  | C:0.236486     |
| chr28 | 9787520 | 2 | 290 | T:0.772414  | G:0.227586     |
| chr28 | 9787968 | 2 | 310 | A:0.758065  | G:0.241935     |
| chr28 | 9788045 | 2 | 300 | G:0.766667  | A:0.233333     |
| chr28 | 9788135 | 2 | 302 | T:0.761589  | A:0.238411     |
| chr28 | 9788454 | 2 | 304 | G:0.759868  | A:0.240132     |
| chr28 | 9788807 | 2 | 302 | G:0.768212  | A:0.231788     |
| chr28 | 9788899 | 2 | 312 | T:0.740385  | A:0.259615     |
| chr28 | 9789035 | 2 | 282 | CT:0.751773 | C:0.248227     |
| chr28 | 9789068 | 2 | 298 | C:0.795302  | CAAAT:0.204698 |
| chr28 | 9789180 | 2 | 302 | C:0.745033  | T:0.254967     |
| chr28 | 9789612 | 2 | 292 | T:0.763699  | C:0.236301     |
| chr28 | 9789645 | 2 | 292 | G:0.113014  | A:0.886986     |
| chr28 | 9789859 | 2 | 284 | C:0.792254  | A:0.207746     |
| chr28 | 9790016 | 2 | 306 | T:0.787582  | TAGCC:0.212418 |
| chr28 | 9790026 | 2 | 286 | TA:0.867133 | T:0.132867     |
| chr28 | 9790074 | 2 | 284 | C:0.739437  | T:0.260563     |
| chr28 | 9790405 | 2 | 296 | C:0.915541  | T:0.0844595    |
| chr28 | 9790419 | 2 | 296 | G:0.763514  | A:0.236486     |
| chr28 | 9790455 | 2 | 288 | T:0.118056  | C:0.881944     |
| chr28 | 9790526 | 2 | 292 | A:0.736301  | G:0.263699     |
| chr28 | 9790662 | 2 | 296 | C:0.773649  | T:0.226351     |
| chr28 | 9791240 | 2 | 310 | A:0.767742  | AAG:0.232258   |
| chr28 | 9791601 | 2 | 306 | G:0.764706  | A:0.235294     |
| chr28 | 9791611 | 2 | 306 | C:0.764706  | T:0.235294     |
| chr28 | 9792278 | 2 | 280 | T:0.417857  | TA:0.582143    |
| chr28 | 9792359 | 2 | 306 | G:0.767974  | T:0.232026     |
| chr28 | 9792736 | 2 | 300 | C:0.973333  | T:0.0266667    |
| chr28 | 9792838 | 2 | 298 | G:0.808725  | C:0.191275     |
| chr28 | 9792888 | 2 | 304 | AC:0.796053 | A:0.203947     |
| chr28 | 9793291 | 2 | 308 | G:0.993506  | A:0.00649351   |
| chr28 | 9793351 | 2 | 312 | C:0.967949  | T:0.0320513    |
| chr28 | 9793488 | 2 | 290 | G:0.965517  | A:0.0344828    |
| chr28 | 9793596 | 2 | 312 | C:0.798077  | T:0.201923     |
| chr28 | 9793667 | 2 | 310 | G:0.812903  | A:0.187097     |
| chr28 | 9793740 | 2 | 306 | G:0.800654  | T:0.199346     |
| chr28 | 9793897 | 2 | 294 | G:0.812925  | A:0.187075     |
| chr28 | 9793969 | 2 | 300 | A:0.786667  | G:0.213333     |
| chr28 | 9793999 | 2 | 284 | G:0.630282  | GA:0.369718    |
| chr28 | 9794014 | 2 | 294 | AT:0.785714 | A:0.214286     |
| chr28 | 9794053 | 2 | 288 | A:0.777778  | G:0.222222     |
| chr28 | 9794505 | 2 | 300 | A:0.99      | G:0.01         |
| chr28 | 9794625 | 2 | 304 | A:0.970395  | G:0.0296053    |
| chr28 | 9795001 | 2 | 292 | C:0.982877  | T:0.0171233    |
| chr28 | 9795058 | 2 | 290 | C:0.72069   | G:0.27931      |
| chr28 | 9795444 | 2 | 304 | A:0.0361842 | G:0.963816     |
| chr28 | 9795515 | 2 | 298 | T:0.033557  | C:0.966443     |
| chr28 | 9795678 | 2 | 298 | A:0.781879  | G:0.218121     |
| chr28 | 9795826 | 2 | 308 | CT:0.967532 | C:0.0324675    |

|                |                        |   |     |                   |              |
|----------------|------------------------|---|-----|-------------------|--------------|
| chr28          | 9795946                | 2 | 302 | A:0.0397351       | G:0.960265   |
| chr28          | 9795986                | 2 | 302 | T:0.983444        | C:0.0165563  |
| chr28          | 9796648                | 2 | 302 | C:0.0596026       | T:0.940397   |
| chr28          | 9796896                | 2 | 292 | T:0.643836        | C:0.356164   |
| chr28          | 9797057                | 2 | 304 | C:0.6875          | A:0.3125     |
| chr28          | 9797235                | 2 | 294 | T:0.959184        | C:0.0408163  |
| chr28          | 9797265                | 2 | 298 | T:0.647651        | C:0.352349   |
| chr28          | 9797266                | 2 | 302 | G:0.701987        | A:0.298013   |
| chr28          | 9797282                | 2 | 300 | C:0.946667        | T:0.0533333  |
| chr28          | 9797798                | 2 | 302 | G:0.950331        | A:0.0496689  |
| chr28          | 9798027                | 2 | 308 | C:0.548701        | T:0.451299   |
| chr28          | 9798108                | 2 | 306 | G:0.947712        | A:0.0522876  |
| chr28          | 9798234                | 2 | 314 | T:0.942675        | C:0.0573248  |
| chr28          | 9800437                | 2 | 306 | A:0.0392157       | G:0.960784   |
| chr28          | 9800547                | 5 | 308 | C:0.172078        | CA:0.126623  |
| CAA:0.136364   | CAAAAA:0.386364        |   |     | CAAAAAAA:0.178571 |              |
| chr28          | 9801138                | 2 | 300 | C:0.96            | T:0.04       |
| chr28          | 9801139                | 2 | 300 | A:0.96            | G:0.04       |
| chr28          | 9801402                | 2 | 290 | G:0.968966        | T:0.0310345  |
| chr28          | 9801683                | 2 | 288 | C:0.920139        | T:0.0798611  |
| chr28          | 9802136                | 2 | 298 | C:0.932886        | G:0.0671141  |
| chr28          | 9802306                | 2 | 290 | C:0.972414        | T:0.0275862  |
| chr28          | 9802363                | 4 | 300 | C:0.08            | CA:0.0466667 |
| 0.313333       | CAAAAA:0.56            |   |     |                   | CAAAA:       |
| chr28          | 9802788                | 2 | 310 | G:0.103226        | A:0.896774   |
| chr28          | 9802920                | 3 | 294 | GAA:0.166667      | G:0.129252   |
| GA:0.704082    |                        |   |     |                   |              |
| chr28          | 9803120                | 2 | 310 | C:0.687097        | T:0.312903   |
| chr28          | 9803834                | 2 | 302 | G:0.715232        | A:0.284768   |
| chr28          | 9803869                | 2 | 290 | G:0.696552        | A:0.303448   |
| chr28          | 9804295                | 2 | 308 | G:0.694805        | A:0.305195   |
| chr28          | 9804465                | 2 | 304 | T:0.690789        | C:0.309211   |
| chr28          | 9804556                | 2 | 314 | T:0.687898        | TA:0.312102  |
| chr28          | 9804561                | 2 | 314 | T:0.687898        | C:0.312102   |
| chr28          | 9804876                | 2 | 306 | C:0.705882        | T:0.294118   |
| chr28          | 9805551                | 2 | 304 | T:0.671053        | C:0.328947   |
| chr28          | 9805552                | 2 | 304 | G:0.671053        | C:0.328947   |
| chr28          | 9805581                | 2 | 302 | A:0.115894        | ACT:0.884106 |
| chr28          | 9806859                | 2 | 298 | A:0.996644        | G:0.0033557  |
| chr28          | 9807002                | 4 | 310 | AAC:0.267742      | A:0.151613   |
| AACAC:0.222581 | AACACACACACAC:0.358065 |   |     |                   |              |
| chr28          | 9807618                | 2 | 304 | A:0.578947        | G:0.421053   |
| chr28          | 9808169                | 2 | 308 | A:0.928571        | C:0.0714286  |
| chr28          | 9808283                | 2 | 296 | A:0.415541        | G:0.584459   |
| chr28          | 9808530                | 2 | 300 | G:0.96            | A:0.04       |
| chr28          | 9809053                | 2 | 298 | G:0.604027        | A:0.395973   |
| chr28          | 9809286                | 2 | 298 | G:0.540268        | T:0.459732   |
| chr28          | 9809566                | 2 | 300 | C:0.61            | T:0.39       |
| chr28          | 9810156                | 2 | 302 | C:0.586093        | G:0.413907   |
| chr28          | 9810157                | 2 | 302 | A:0.125828        | G:0.874172   |
| chr28          | 9810435                | 2 | 298 | G:0.607383        | A:0.392617   |
| chr28          | 9810671                | 2 | 308 | GAGA:0.561688     | G:0.438312   |
| chr28          | 9810895                | 2 | 302 | A:0.615894        | G:0.384106   |
| chr28          | 9811110                | 2 | 302 | G:0.609272        | A:0.390728   |

|                               |         |   |     |                          |                  |
|-------------------------------|---------|---|-----|--------------------------|------------------|
| chr28                         | 9811232 | 2 | 294 | G:0.585034               | C:0.414966       |
| chr28                         | 9811910 | 2 | 298 | C:0.583893               | T:0.416107       |
| chr28                         | 9812192 | 2 | 310 | C:0.580645               | T:0.419355       |
| chr28                         | 9812358 | 2 | 300 | G:0.58                   | A:0.42           |
| chr28                         | 9812908 | 2 | 302 | T:0.576159               | A:0.423841       |
| chr28                         | 9812918 | 3 | 318 | AGTGTGTGTGTGTGT:0.147799 | A:               |
| 0.443396 AGTGTGTGTGT:0.408805 |         |   |     |                          |                  |
| chr28                         | 9813361 | 2 | 294 | T:0.129252               | G:0.870748       |
| chr28                         | 9813377 | 2 | 296 | G:0.847973               | A:0.152027       |
| chr28                         | 9813701 | 2 | 298 | C:0.580537               | A:0.419463       |
| chr28                         | 9814165 | 2 | 290 | C:0.558621               | T:0.441379       |
| chr28                         | 9814419 | 3 | 302 | GAA:0.549669             | G:0.122517       |
| GAAAA:0.327815                |         |   |     |                          |                  |
| chr28                         | 9814618 | 2 | 302 | G:0.950331               | T:0.0496689      |
| chr28                         | 9814674 | 2 | 300 | A:0.14                   | G:0.86           |
| chr28                         | 9814903 | 2 | 306 | C:0.555556               | T:0.444444       |
| chr28                         | 9814907 | 2 | 306 | T:0.980392               | A:0.0196078      |
| chr28                         | 9815148 | 2 | 312 | A:0.121795               | G:0.878205       |
| chr28                         | 9815254 | 2 | 312 | T:0.862179               | TTAATAA:0.137821 |
| chr28                         | 9815653 | 2 | 296 | G:0.138514               | A:0.861486       |
| chr28                         | 9815684 | 2 | 306 | G:0.924837               | A:0.0751634      |
| chr28                         | 9815850 | 2 | 306 | G:0.643791               | A:0.356209       |
| chr28                         | 9816208 | 2 | 312 | T:0.13141                | C:0.86859        |
| chr28                         | 9816217 | 2 | 312 | C:0.13141                | A:0.86859        |
| chr28                         | 9817044 | 2 | 302 | A:0.84106                | G:0.15894        |
| chr28                         | 9817417 | 2 | 304 | G:0.407895               | A:0.592105       |
| chr28                         | 9817556 | 2 | 308 | T:0.574675               | C:0.425325       |
| chr28                         | 9818005 | 3 | 294 | A:0.469388               | G:0.142857       |
| T:0.387755                    |         |   |     |                          |                  |
| chr28                         | 9818139 | 2 | 290 | G:0.448276               | A:0.551724       |
| chr28                         | 9818302 | 2 | 300 | C:0.956667               | T:0.0433333      |
| chr28                         | 9818360 | 2 | 304 | GGTGA:0.710526           | G:0.289474       |
| chr28                         | 9818551 | 2 | 298 | T:0.446309               | C:0.553691       |
| chr28                         | 9818586 | 2 | 294 | G:0.42517                | A:0.57483        |
| chr28                         | 9818719 | 2 | 306 | C:0.431373               | T:0.568627       |
| chr28                         | 9818756 | 2 | 300 | C:0.426667               | T:0.573333       |
| chr28                         | 9819007 | 2 | 302 | T:0.443709               | C:0.556291       |
| chr28                         | 9820122 | 2 | 302 | T:0.983444               | A:0.0165563      |
| chr28                         | 9820376 | 2 | 304 | G:0.125                  | C:0.875          |
| chr28                         | 9821600 | 2 | 300 | T:0.95                   | C:0.05           |
| chr28                         | 9821617 | 2 | 302 | A:0.675497               | AAAAC:0.324503   |
| chr28                         | 9821736 | 2 | 308 | G:0.688312               | A:0.311688       |
| chr28                         | 9822122 | 2 | 304 | GAA:0.983553             | G:0.0164474      |
| chr28                         | 9822210 | 2 | 308 | C:0.126623               | T:0.873377       |
| chr28                         | 9822230 | 2 | 304 | A:0.115132               | C:0.884868       |
| chr28                         | 9822659 | 2 | 306 | G:0.133987               | A:0.866013       |
| chr28                         | 9822684 | 2 | 304 | C:0.421053               | T:0.578947       |
| chr28                         | 9822815 | 2 | 302 | T:0.122517               | C:0.877483       |
| chr28                         | 9822998 | 2 | 300 | C:0.996667               | CA:0.00333333    |
| chr28                         | 9823379 | 2 | 300 | G:0.683333               | T:0.316667       |
| chr28                         | 9823507 | 2 | 304 | T:0.986842               | C:0.0131579      |
| chr28                         | 9823706 | 2 | 296 | G:0.841216               | A:0.158784       |
| chr28                         | 9824113 | 2 | 294 | A:0.258503               | G:0.741497       |
| chr28                         | 9824436 | 2 | 294 | T:0.70068                | G:0.29932        |

|       |         |   |     |                           |                 |
|-------|---------|---|-----|---------------------------|-----------------|
| chr28 | 9824554 | 2 | 300 | C:0.57                    | T:0.43          |
| chr28 | 9824573 | 2 | 300 | C:0.846667                | A:0.153333      |
| chr28 | 9824820 | 2 | 108 | A:0.685185                | T:0.314815      |
| chr28 | 9824902 | 2 | 302 | G:0.13245                 | A:0.86755       |
| chr28 | 9825043 | 2 | 310 | A:0.987097                | G:0.0129032     |
| chr28 | 9825151 | 2 | 310 | CTTTTTTTTTT:0.587097      | C:<br>0.412903  |
| chr28 | 9825239 | 2 | 302 | T:0.688742                | C:0.311258      |
| chr28 | 9825274 | 2 | 304 | T:0.292763                | C:0.707237      |
| chr28 | 9825381 | 2 | 278 | T:0.28777                 | C:0.71223       |
| chr28 | 9825714 | 2 | 310 | C:0.945161                | T:0.0548387     |
| chr28 | 9825812 | 2 | 310 | T:0.280645                | C:0.719355      |
| chr28 | 9826285 | 2 | 296 | G:0.959459                | A:0.0405405     |
| chr28 | 9826483 | 2 | 310 | GAAGT:0.6                 | G:0.4           |
| chr28 | 9826672 | 2 | 300 | C:0.293333                | T:0.706667      |
| chr28 | 9827433 | 2 | 296 | TTTTTC:0.662162           | T:0.337838      |
| chr28 | 9827734 | 2 | 300 | A:0.28                    | C:0.72          |
| chr28 | 9827865 | 2 | 312 | C:0.291667                | T:0.708333      |
| chr28 | 9828526 | 2 | 302 | C:0.264901                | A:0.735099      |
| chr28 | 9828545 | 2 | 306 | TACACACACAA:0.96732       | T:<br>0.0326797 |
| chr28 | 9828555 | 4 | 318 | AACACACACACACAC:0.283019  | A:<br>0.31761   |
| chr28 | 9828679 | 2 | 304 | CACACACACACACAC:0.0534591 | A:0.148026      |
| chr28 | 9828690 | 2 | 308 | C:0.851974                | A:0.148026      |
| chr28 | 9828927 | 2 | 308 | TACAA:0.298701            | T:0.701299      |
| chr28 | 9829025 | 2 | 308 | C:0.305195                | T:0.694805      |
| chr28 | 9829252 | 2 | 310 | C:0.691558                | T:0.308442      |
| chr28 | 9829295 | 2 | 310 | T:0.277419                | C:0.722581      |
| chr28 | 9829295 | 2 | 310 | T:0.277419                | A:0.722581      |
| chr28 | 9829352 | 2 | 316 | T:0.287975                | G:0.712025      |
| chr28 | 9829354 | 2 | 316 | G:0.287975                | A:0.712025      |
| chr28 | 9829438 | 2 | 304 | G:0.289474                | A:0.710526      |
| chr28 | 9830182 | 2 | 308 | G:0.272727                | T:0.727273      |
| chr28 | 9830309 | 2 | 296 | T:0.297297                | TA:0.702703     |
| chr28 | 9830679 | 2 | 312 | T:0.0833333               | TA:0.916667     |
| chr28 | 9830811 | 2 | 298 | C:0.983221                | A:0.0167785     |
| chr28 | 9831040 | 2 | 308 | G:0.266234                | A:0.733766      |
| chr28 | 9831068 | 2 | 306 | C:0.277778                | T:0.722222      |
| chr28 | 9831687 | 2 | 306 | T:0.29085                 | C:0.70915       |
| chr28 | 9831751 | 2 | 312 | T:0.266026                | C:0.733974      |
| chr28 | 9832026 | 2 | 302 | A:0.976821                | G:0.0231788     |
| chr28 | 9832433 | 2 | 302 | T:0.897351                | C:0.102649      |
| chr28 | 9832538 | 2 | 304 | A:0.253289                | G:0.746711      |
| chr28 | 9832873 | 2 | 294 | CT:0.278912               | C:0.721088      |
| chr28 | 9833889 | 2 | 304 | CTT:0.950658              | C:0.0493421     |
| chr28 | 9833997 | 2 | 292 | T:0.328767                | C:0.671233      |
| chr28 | 9834032 | 2 | 260 | G:0.403846                | C:0.596154      |
| chr28 | 9834344 | 2 | 296 | G:0.260135                | A:0.739865      |
| chr28 | 9834526 | 2 | 310 | G:0.680645                | A:0.319355      |
| chr28 | 9834887 | 2 | 294 | T:0.268707                | G:0.731293      |
| chr28 | 9835154 | 2 | 316 | T:0.727848                | C:0.272152      |
| chr28 | 9835283 | 2 | 304 | T:0.654605                | G:0.345395      |
| chr28 | 9835327 | 2 | 308 | T:0.681818                | C:0.318182      |
| chr28 | 9836035 | 2 | 306 | C:0.70915                 | G:0.29085       |



|                |         |   |     |                  |                  |
|----------------|---------|---|-----|------------------|------------------|
| chr28          | 9836232 | 2 | 310 | T:0.696774       | TGAGAGA:0.303226 |
| chr28          | 9836370 | 2 | 282 | C:0.677305       | T:0.322695       |
| chr28          | 9836413 | 2 | 280 | ATGTG:0.571429   | A:0.428571       |
| chr28          | 9836440 | 2 | 280 | TGTGTGC:0.742857 | T:0.257143       |
| chr28          | 9836868 | 2 | 308 | C:0.704545       | T:0.295455       |
| chr28          | 9836958 | 2 | 306 | C:0.964052       | T:0.0359477      |
| chr28          | 9837299 | 2 | 308 | C:0.954545       | T:0.0454545      |
| chr28          | 9837424 | 2 | 304 | C:0.690789       | G:0.309211       |
| chr28          | 9837820 | 2 | 312 | C:0.673077       | T:0.326923       |
| chr28          | 9838398 | 2 | 310 | A:0.706452       | G:0.293548       |
| chr28          | 9838524 | 2 | 296 | G:0.699324       | A:0.300676       |
| chr28          | 9838729 | 2 | 308 | G:0.659091       | A:0.340909       |
| chr28          | 9839753 | 3 | 298 | G:0.362416       | GAT:0.392617     |
| GATAT:0.244966 |         |   |     |                  |                  |
| chr28          | 9839853 | 2 | 256 | C:0.214844       | CCT:0.785156     |
| chr28          | 9840164 | 2 | 306 | A:0.898693       | G:0.101307       |
| chr28          | 9840384 | 2 | 304 | T:0.680921       | G:0.319079       |
| chr28          | 9840452 | 2 | 306 | A:0.653595       | T:0.346405       |
| chr28          | 9840554 | 2 | 314 | T:0.681529       | C:0.318471       |
| chr28          | 9841083 | 2 | 310 | C:0.6 G:0.4      |                  |
| chr28          | 9841148 | 2 | 296 | C:0.989865       | T:0.0101351      |
| chr28          | 9841160 | 2 | 292 | G:0.695205       | A:0.304795       |
| chr28          | 9842075 | 2 | 278 | G:0.690647       | A:0.309353       |
| chr28          | 9842205 | 3 | 314 | T:0.694268       | TAA:0.22293      |
| TAAA:0.0828025 |         |   |     |                  |                  |
| chr28          | 9842215 | 3 | 314 | TA:0.292994      | T:0.401274       |
| AA:0.305732    |         |   |     |                  |                  |
| chr28          | 9842217 | 2 | 310 | A:0.987097       | T:0.0129032      |
| chr28          | 9842220 | 2 | 308 | A:0.899351       | T:0.100649       |
| chr28          | 9842238 | 3 | 314 | A:0.178344       | AT:0.515924      |
| AAT:0.305732   |         |   |     |                  |                  |
| chr28          | 9842322 | 2 | 304 | C:0.664474       | T:0.335526       |
| chr28          | 9842442 | 2 | 302 | G:0.695364       | C:0.304636       |
| chr28          | 9842543 | 2 | 308 | A:0.694805       | T:0.305195       |
| chr28          | 9842745 | 2 | 298 | C:0.667785       | T:0.332215       |
| chr28          | 9843409 | 2 | 286 | T:0.695804       | C:0.304196       |
| chr28          | 9843430 | 2 | 286 | T:0.695804       | C:0.304196       |
| chr28          | 9843567 | 2 | 286 | T:0.695804       | TAA:0.304196     |
| chr28          | 9843654 | 2 | 254 | G:0.88189        | C:0.11811        |
| chr28          | 9843795 | 2 | 12  | C:0.666667       | T:0.333333       |
| chr28          | 9843984 | 2 | 298 | T:0.657718       | C:0.342282       |
| chr28          | 9843998 | 2 | 302 | G:0.884106       | A:0.115894       |
| chr28          | 9844064 | 2 | 304 | G:0.983553       | GAT:0.0164474    |
| chr28          | 9844773 | 2 | 298 | C:0.986577       | T:0.0134228      |
| chr28          | 9844863 | 3 | 288 | CA:0.527778      | C:0.142361       |
| CAA:0.329861   |         |   |     |                  |                  |
| chr28          | 9844902 | 2 | 298 | C:0.694631       | T:0.305369       |
| chr28          | 9845152 | 2 | 310 | G:0.683871       | A:0.316129       |
| chr28          | 9845180 | 2 | 304 | A:0.707237       | T:0.292763       |
| chr28          | 9845491 | 2 | 296 | A:0.695946       | G:0.304054       |
| chr28          | 9845837 | 2 | 316 | TA:0.689873      | T:0.310127       |
| chr28          | 9845981 | 2 | 286 | A:0.688811       | G:0.311189       |
| chr28          | 9846137 | 2 | 306 | A:0.689542       | G:0.310458       |
| chr28          | 9846192 | 3 | 300 | CAGAG:0.566667   | C:0.29 CAGAGAG:  |

0.143333

chr28 9846229 2 294 G:0.697279 C:0.302721  
chr28 9846345 2 274 TC:0.70073 T:0.29927  
chr28 9846363 3 288 T:0.368056 TA:0.520833

TAA:0.111111

chr28 9846436 2 312 G:0.929487 A:0.0705128  
chr28 9846461 2 310 C:0.703226 T:0.296774  
chr28 9846494 2 302 T:0.688742 C:0.311258  
chr28 9846687 2 292 C:0.688356 CCT:0.311644  
chr28 9846729 2 292 AT:0.606164 A:0.393836  
chr28 9846731 2 292 TTA:0.986301 T:0.0136986  
chr28 9846732 2 288 TA:0.538194 T:0.461806  
chr28 9847396 2 296 C:0.662162 T:0.337838  
chr28 9847506 2 302 T:0.13245 C:0.86755  
chr28 9847533 2 292 A:0.64726 C:0.35274  
chr28 9848139 2 292 T:0.835616 C:0.164384  
chr28 9848246 2 298 G:0.828859 A:0.171141  
chr28 9848298 2 290 A:0.144828 G:0.855172  
chr28 9849306 2 302 C:0.294702 T:0.705298  
chr28 9849486 2 298 A:0.822148 AC:0.177852  
chr28 9849721 2 304 A:0.322368 C:0.677632  
chr28 9849820 2 292 CACA:0.328767 C:0.671233  
chr28 9849928 2 300 A:0.333333 T:0.666667  
chr28 9850403 2 316

CTAGTAGCACCTAGTAGGTGGGAGAGTGAAGCGGGGCGAAG:0.14557 C:0.85443

chr28 9850627 2 312 A:0.836538 G:0.163462  
chr28 9850811 2 298 AT:0.446309 A:0.553691  
chr28 9850888 2 300 C:0.35 CT:0.65  
chr28 9850891 2 300 A:0.35 T:0.65  
chr28 9851276 2 302 A:0.162252 C:0.837748  
chr28 9851497 2 298 A:0.822148 G:0.177852  
chr28 9851627 2 308 G:0.457792 A:0.542208  
chr28 9851629 2 306 TC:0.957516 T:0.0424837  
chr28 9851788 2 292 C:0.910959 T:0.0890411  
chr28 9851888 2 294 A:0.812925 T:0.187075  
chr28 9852068 2 252 TGGG:0.238095 T:0.761905  
chr28 9852170 2 300 ACCT:0.546667 A:0.453333  
chr28 9852576 2 310 A:0.809677 G:0.190323  
chr28 9852994 2 312 A:0.820513 T:0.179487  
chr28 9853053 2 298 G:0.567114 A:0.432886  
chr28 9853304 2 296 C:0.195946 T:0.804054  
chr28 9853494 2 304 A:0.361842 G:0.638158  
chr28 9853508 2 304 A:0.184211 G:0.815789  
chr28 9853632 2 302 C:0.377483 CGAGG:0.622517  
chr28 9853923 2 294 C:0.952381 A:0.047619  
chr28 9854234 2 296 C:0.378378 T:0.621622  
chr28 9854412 2 300 A:0.383333 T:0.616667  
chr28 9854497 2 306 AAC:0.993464 A:0.00653595  
chr28 9854514 2 308 C:0.204545 G:0.795455  
chr28 9854797 2 306 G:0.333333 A:0.666667  
chr28 9855172 2 302 A:0.370861 G:0.629139  
chr28 9855239 3 296 C:0.135135 CT:0.239865

CTT:0.625

chr28 9855333 2 300 A:0.38 C:0.62

|                    |         |                         |     |                  |               |
|--------------------|---------|-------------------------|-----|------------------|---------------|
| chr28              | 9855871 | 2                       | 304 | G:0.368421       | A:0.631579    |
| chr28              | 9856031 | 2                       | 308 | A:0.357143       | AG:0.642857   |
| chr28              | 9856260 | 2                       | 302 | G:0.34106        | A:0.65894     |
| chr28              | 9856378 | 2                       | 296 | G:0.378378       | C:0.621622    |
| chr28              | 9856454 | 2                       | 292 | CA:0.883562      | C:0.116438    |
| chr28              | 9856687 | 2                       | 304 | A:0.358553       | G:0.641447    |
| chr28              | 9856755 | 2                       | 298 | C:0.372483       | T:0.627517    |
| chr28              | 9856858 | 2                       | 304 | C:0.986842       | T:0.0131579   |
| chr28              | 9857134 | 2                       | 306 | T:0.388889       | C:0.611111    |
| chr28              | 9858708 | 2                       | 282 | C:0.914894       | T:0.0851064   |
| chr28              | 9859278 | 2                       | 294 | C:0.578231       | T:0.421769    |
| chr28              | 9861136 | 4                       | 302 | CCT:0.615894     | C:0.198675    |
| CCTCT:0.0993377    |         | CCTCTCT:0.0860927       |     |                  |               |
| chr28              | 9861190 | 3                       | 280 | TA:0.421429      | T:0.153571    |
| TAA:0.425          |         |                         |     |                  |               |
| chr28              | 9861661 | 2                       | 300 | C:0.906667       | T:0.0933333   |
| chr28              | 9862142 | 2                       | 302 | C:0.450331       | T:0.549669    |
| chr28              | 9862228 | 2                       | 246 | GGAGAGA:0.845528 | G:0.154472    |
| chr28              | 9862257 | 2                       | 264 | GAGAGA:0.753788  | G:0.246212    |
| chr28              | 9862263 | 4                       | 300 | GGC:0.596667     | GCGC:0.27     |
| G:0.0866667        |         | GGCGC:0.0466667         |     |                  |               |
| chr28              | 9862625 | 2                       | 304 | T:0.976974       | C:0.0230263   |
| chr28              | 9862626 | 2                       | 304 | C:0.976974       | T:0.0230263   |
| chr28              | 9862661 | 2                       | 302 | C:0.990066       | T:0.00993377  |
| chr28              | 9862727 | 2                       | 306 | C:0.937908       | G:0.0620915   |
| chr28              | 9862798 | 2                       | 302 | G:0.917219       | A:0.0827815   |
| chr28              | 9863474 | 2                       | 312 | C:0.983974       | A:0.0160256   |
| chr28              | 9863582 | 2                       | 290 | A:0.986207       | ATG:0.0137931 |
| chr28              | 9863699 | 2                       | 298 | G:0.510067       | A:0.489933    |
| chr28              | 9863896 | 2                       | 304 | C:0.980263       | T:0.0197368   |
| chr28              | 9864348 | 2                       | 296 | G:0.986486       | A:0.0135135   |
| chr28              | 9864350 | 2                       | 296 | T:0.962838       | TA:0.0371622  |
| chr28              | 9864458 | 2                       | 298 | C:0.916107       | T:0.0838926   |
| chr28              | 9864476 | 2                       | 304 | A:0.203947       | G:0.796053    |
| chr28              | 9864707 | 2                       | 300 | T:0.976667       | A:0.0233333   |
| chr28              | 9864884 | 2                       | 298 | G:0.489933       | A:0.510067    |
| chr28              | 9865059 | 2                       | 304 | A:0.980263       | G:0.0197368   |
| chr28              | 9865602 | 2                       | 302 | C:0.976821       | A:0.0231788   |
| chr28              | 9865684 | 2                       | 306 | A:0.375817       | G:0.624183    |
| chr28              | 9865692 | 2                       | 310 | G:0.906452       | T:0.0935484   |
| chr28              | 9865757 | 2                       | 302 | C:0.970199       | A:0.0298013   |
| chr28              | 9865970 | 2                       | 304 | C:0.983553       | T:0.0164474   |
| chr28              | 9866030 | 2                       | 314 | C:0.980892       | T:0.0191083   |
| chr28              | 9866648 | 4                       | 312 | TTTTA:0.317308   | T:0.0705128   |
| TTTTATTTA:0.538462 |         | TTTTATTTATTTA:0.0737179 |     |                  |               |
| chr28              | 9866773 | 2                       | 296 | C:0.989865       | T:0.0101351   |
| chr28              | 9867334 | 2                       | 306 | G:0.970588       | A:0.0294118   |
| chr28              | 9867590 | 2                       | 300 | G:0.98           | A:0.02        |
| chr28              | 9867754 | 2                       | 292 | T:0.304795       | C:0.695205    |
| chr28              | 9867842 | 2                       | 298 | C:0.892617       | G:0.107383    |
| chr28              | 9867917 | 2                       | 294 | C:0.979592       | G:0.0204082   |
| chr28              | 9868206 | 2                       | 312 | A:0.807692       | T:0.192308    |
| chr28              | 9868291 | 2                       | 302 | T:0.996689       | G:0.00331126  |
| chr28              | 9868294 | 2                       | 302 | T:0.307947       | C:0.692053    |

|       |         |   |     |                |                           |
|-------|---------|---|-----|----------------|---------------------------|
| chr28 | 9868531 | 2 | 296 | A:0.550676     | C:0.449324                |
| chr28 | 9868569 | 2 | 300 | T:0.883333     | C:0.116667                |
| chr28 | 9868623 | 2 | 306 | A:0.555556     | G:0.444444                |
| chr28 | 9868641 | 2 | 306 | G:0.803922     | A:0.196078                |
| chr28 | 9868719 | 2 | 288 | G:0.597222     | T:0.402778                |
| chr28 | 9868812 | 2 | 296 | C:0.817568     | T:0.182432                |
| chr28 | 9868859 | 2 | 300 | A:0.973333     | C:0.0266667               |
| chr28 | 9868965 | 2 | 282 | TG:0.425532    | T:0.574468                |
| chr28 | 9869492 | 2 | 262 | T:0.698473     | TA:0.301527               |
| chr28 | 9869832 | 2 | 310 | C:0.858065     | T:0.141935                |
| chr28 | 9869902 | 2 | 296 | C:0.945946     | T:0.0540541               |
| chr28 | 9870157 | 2 | 318 | ATTAGT:0.91195 | A:0.0880503               |
| chr28 | 9871663 | 2 | 304 | A:0.523026     | G:0.476974                |
| chr28 | 9872139 | 2 | 312 | T:0.439103     | C:0.560897                |
| chr28 | 9872724 | 2 | 308 | T:0.535714     | C:0.464286                |
| chr28 | 9872888 | 2 | 296 | T:0.439189     | A:0.560811                |
| chr28 | 9872930 | 2 | 290 | G:0.444828     | T:0.555172                |
| chr28 | 9873655 | 2 | 308 | G:0.918831     | T:0.0811688               |
| chr28 | 9874827 | 2 | 312 | G:0.516026     | C:0.483974                |
| chr28 | 9875173 | 2 | 304 | A:0.907895     | G:0.0921053               |
| chr28 | 9875181 | 2 | 306 | G:0.888889     | T:0.111111                |
| chr28 | 9875347 | 2 | 294 | G:0.561224     | A:0.438776                |
| chr28 | 9875558 | 2 | 304 | T:0.578947     | C:0.421053                |
| chr28 | 9875957 | 2 | 304 | GA:0.539474    | G:0.460526                |
| chr28 | 9876029 | 2 | 304 | C:0.664474     | T:0.335526                |
| chr28 | 9876312 | 2 | 292 | A:0.989726     | G:0.010274                |
| chr28 | 9876381 | 2 | 316 | T:0.977848     | TGGAGGGCCAC:<br>0.0221519 |
| chr28 | 9876550 | 2 | 290 | G:0.406897     | T:0.593103                |
| chr28 | 9877259 | 2 | 304 | T:0.565789     | C:0.434211                |
| chr28 | 9877592 | 2 | 312 | T:0.676282     | G:0.323718                |
| chr28 | 9877635 | 2 | 312 | G:0.503205     | GA:0.496795               |
| chr28 | 9877656 | 2 | 314 | T:0.299363     | A:0.700637                |
| chr28 | 9877730 | 2 | 310 | A:0.56129      | G:0.43871                 |
| chr28 | 9878408 | 2 | 298 | C:0.302013     | G:0.697987                |
| chr28 | 9878831 | 2 | 300 | G:0.93 A:0.07  |                           |
| chr28 | 9878967 | 2 | 306 | G:0.69281      | A:0.30719                 |
| chr28 | 9879096 | 2 | 310 | T:0.86129      | A:0.13871                 |
| chr28 | 9879617 | 2 | 290 | G:0.972414     | T:0.0275862               |
| chr28 | 9880012 | 2 | 300 | C:0.456667     | T:0.543333                |
| chr28 | 9880112 | 2 | 288 | C:0.444444     | T:0.555556                |
| chr28 | 9880193 | 2 | 304 | G:0.842105     | A:0.157895                |
| chr28 | 9880387 | 2 | 284 | C:0.552817     | G:0.447183                |
| chr28 | 9880464 | 2 | 296 | CCA:0.780405   | C:0.219595                |
| chr28 | 9880508 | 2 | 290 | G:0.451724     | A:0.548276                |
| chr28 | 9880510 | 2 | 290 | A:0.237931     | G:0.762069                |
| chr28 | 9880537 | 2 | 278 | A:0.478417     | G:0.521583                |
| chr28 | 9880570 | 2 | 284 | G:0.855634     | A:0.144366                |
| chr28 | 9880870 | 2 | 310 | T:0.248387     | TC:0.751613               |
| chr28 | 9880874 | 2 | 310 | T:0.248387     | TCTACCA:0.751613          |
| chr28 | 9880964 | 2 | 302 | A:0.407285     | G:0.592715                |
| chr28 | 9881334 | 2 | 258 | C:0.581395     | G:0.418605                |
| chr28 | 9881668 | 2 | 298 | C:0.916107     | T:0.0838926               |
| chr28 | 9881779 | 2 | 306 | G:0.849673     | T:0.150327                |

|       |                             |   |     |               |             |
|-------|-----------------------------|---|-----|---------------|-------------|
| chr28 | 9881780                     | 3 | 296 | AT:0.530405   | A:0.222973  |
|       | ATT:0.246622                |   |     |               |             |
| chr28 | 9881785                     | 2 | 306 | T:0.849673    | A:0.150327  |
| chr28 | 9882122                     | 2 | 300 | A:0.766667    | G:0.233333  |
| chr28 | 9882387                     | 2 | 306 | C:0.663399    | A:0.336601  |
| chr28 | 9882497                     | 2 | 294 | T:0.891156    | C:0.108844  |
| chr28 | 9882690                     | 2 | 310 | T:0.919355    | A:0.0806452 |
| chr28 | 9882745                     | 2 | 306 | G:0.75817     | A:0.24183   |
| chr28 | 9882816                     | 2 | 302 | G:0.854305    | A:0.145695  |
| chr28 | 9882890                     | 2 | 302 | T:0.0794702   | C:0.92053   |
| chr28 | 9882931                     | 2 | 302 | G:0.92053     | A:0.0794702 |
| chr28 | 9882979                     | 2 | 304 | G:0.914474    | A:0.0855263 |
| chr28 | 9883080                     | 2 | 294 | G:0.72449     | C:0.27551   |
| chr28 | 9883168                     | 2 | 312 | CAG:0.471154  | C:0.528846  |
| chr28 | 9883170                     | 2 | 312 | GA:0.791667   | G:0.208333  |
| chr28 | 9883353                     | 2 | 286 | T:0.370629    | C:0.629371  |
| chr28 | 9883357                     | 2 | 292 | C:0.914384    | T:0.0856164 |
| chr28 | 9883364                     | 2 | 284 | A:0.253521    | G:0.746479  |
| chr28 | 9883521                     | 2 | 274 | C:0.39781     | T:0.60219   |
| chr28 | 9883583                     | 2 | 234 | C:0.41453     | CCG:0.58547 |
| chr28 | 9883586                     | 2 | 234 | A:0.41453     | C:0.58547   |
| chr28 | 9883756                     | 2 | 288 | AT:0.274306   | A:0.725694  |
| chr28 | 9883762                     | 2 | 288 | G:0.927083    | C:0.0729167 |
| chr28 | 9884133                     | 2 | 306 | G:0.732026    | A:0.267974  |
| chr28 | 9884153                     | 2 | 306 | TA:0.924837   | T:0.0751634 |
| chr28 | 9884223                     | 2 | 306 | G:0.748366    | A:0.251634  |
| chr28 | 9884383                     | 2 | 308 | T:0.331169    | C:0.668831  |
| chr28 | 9884555                     | 2 | 304 | T:0.618421    | G:0.381579  |
| chr28 | 9884681                     | 2 | 304 | A:0.638158    | G:0.361842  |
| chr28 | 9884689                     | 2 | 306 | G:0.918301    | A:0.0816993 |
| chr28 | 9884923                     | 2 | 304 | A:0.611842    | G:0.388158  |
| chr28 | 9884992                     | 2 | 300 | A:0.39 T:0.61 |             |
| chr28 | 9885099                     | 4 | 312 | T:0.0480769   | TA:0.166667 |
|       | TAA:0.237179 TAAAA:0.548077 |   |     |               |             |
| chr28 | 9885950                     | 2 | 302 | ATCT:0.877483 | A:0.122517  |
| chr28 | 9886081                     | 2 | 304 | T:0.950658    | C:0.0493421 |
| chr28 | 9886147                     | 2 | 298 | T:0.181208    | C:0.818792  |
| chr28 | 9886881                     | 2 | 306 | A:0.98366     | T:0.0163399 |
| chr28 | 9887013                     | 2 | 310 | A:0.864516    | G:0.135484  |
| chr28 | 9887087                     | 2 | 304 | A:0.976974    | C:0.0230263 |
| chr28 | 9887412                     | 2 | 300 | C:0.973333    | T:0.0266667 |
| chr28 | 9887429                     | 2 | 298 | T:0.862416    | G:0.137584  |
| chr28 | 9887864                     | 2 | 302 | A:0.976821    | G:0.0231788 |
| chr28 | 9888421                     | 2 | 286 | G:0.975524    | A:0.0244755 |
| chr28 | 9888500                     | 2 | 300 | C:0.866667    | A:0.133333  |
| chr28 | 9889061                     | 2 | 304 | C:0.983553    | A:0.0164474 |
| chr28 | 9889248                     | 2 | 302 | A:0.86755     | G:0.13245   |
| chr28 | 9889768                     | 2 | 300 | TA:0.5 T:0.5  |             |
| chr28 | 9889985                     | 2 | 296 | T:0.986486    | A:0.0135135 |
| chr28 | 9890004                     | 2 | 304 | G:0.503289    | T:0.496711  |
| chr28 | 9890114                     | 2 | 310 | T:0.893548    | G:0.106452  |
| chr28 | 9890129                     | 2 | 304 | T:0.891447    | A:0.108553  |
| chr28 | 9890444                     | 2 | 310 | C:0.883871    | T:0.116129  |
| chr28 | 9890455                     | 2 | 310 | C:0.883871    | T:0.116129  |

|              |         |   |     |              |              |
|--------------|---------|---|-----|--------------|--------------|
| chr28        | 9890473 | 2 | 310 | A:0.883871   | AC:0.116129  |
| chr28        | 9890512 | 2 | 300 | G:0.863333   | A:0.136667   |
| chr28        | 9890523 | 2 | 300 | G:0.863333   | T:0.136667   |
| chr28        | 9890737 | 2 | 310 | A:0.880645   | T:0.119355   |
| chr28        | 9891212 | 2 | 290 | G:0.889655   | A:0.110345   |
| chr28        | 9891337 | 2 | 294 | G:0.979592   | T:0.0204082  |
| chr28        | 9891404 | 2 | 302 | C:0.357616   | T:0.642384   |
| chr28        | 9891610 | 2 | 314 | C:0.875796   | CT:0.124204  |
| chr28        | 9891719 | 2 | 306 | C:0.875817   | T:0.124183   |
| chr28        | 9891795 | 2 | 304 | TG:0.858553  | T:0.141447   |
| chr28        | 9892170 | 2 | 312 | C:0.875      | T:0.125      |
| chr28        | 9892247 | 2 | 300 | A:0.89       | G:0.11       |
| chr28        | 9892299 | 2 | 318 | T:0.858491   | C:0.141509   |
| chr28        | 9892543 | 2 | 306 | A:0.859477   | C:0.140523   |
| chr28        | 9892591 | 2 | 312 | T:0.839744   | G:0.160256   |
| chr28        | 9892766 | 2 | 310 | A:0.874194   | G:0.125806   |
| chr28        | 9892877 | 2 | 306 | C:0.522876   | A:0.477124   |
| chr28        | 9892943 | 2 | 294 | C:0.87415    | T:0.12585    |
| chr28        | 9893728 | 2 | 314 | T:0.519108   | G:0.480892   |
| chr28        | 9893742 | 2 | 314 | G:0.850318   | C:0.149682   |
| chr28        | 9893744 | 2 | 314 | A:0.866242   | G:0.133758   |
| chr28        | 9893812 | 2 | 304 | A:0.983553   | G:0.0164474  |
| chr28        | 9893869 | 2 | 300 | C:0.96       | G:0.04       |
| chr28        | 9894369 | 2 | 302 | C:0.884106   | CTT:0.115894 |
| chr28        | 9894394 | 2 | 300 | C:0.496667   | T:0.503333   |
| chr28        | 9894917 | 2 | 304 | A:0.881579   | G:0.118421   |
| chr28        | 9894930 | 2 | 298 | C:0.979866   | T:0.0201342  |
| chr28        | 9895380 | 2 | 302 | T:0.940397   | C:0.0596026  |
| chr28        | 9895399 | 2 | 308 | G:0.980519   | A:0.0194805  |
| chr28        | 9895686 | 2 | 308 | C:0.980519   | T:0.0194805  |
| chr28        | 9895992 | 2 | 244 | CT:0.504098  | C:0.495902   |
| chr28        | 9897009 | 2 | 276 | C:0.315217   | T:0.684783   |
| chr28        | 9897107 | 2 | 238 | C:0.789916   | T:0.210084   |
| chr28        | 9898734 | 2 | 242 | G:0.818182   | A:0.181818   |
| chr28        | 9898990 | 2 | 312 | A:0.983974   | T:0.0160256  |
| chr28        | 9899121 | 2 | 298 | A:0.895973   | AT:0.104027  |
| chr28        | 9900019 | 2 | 304 | C:0.986842   | T:0.0131579  |
| chr28        | 9900260 | 2 | 312 | T:0.317308   | C:0.682692   |
| chr28        | 9902271 | 2 | 312 | C:0.961538   | A:0.0384615  |
| chr28        | 9902493 | 2 | 298 | GTA:0.902685 | G:0.0973154  |
| chr28        | 9902507 | 2 | 298 | A:0.610738   | T:0.389262   |
| chr28        | 9902509 | 2 | 298 | A:0.469799   | T:0.530201   |
| chr28        | 9902511 | 2 | 298 | A:0.469799   | T:0.530201   |
| chr28        | 9902600 | 2 | 312 | T:0.788462   | C:0.211538   |
| chr28        | 9903002 | 2 | 296 | C:0.256757   | CA:0.743243  |
| chr28        | 9903712 | 2 | 314 | C:0.675159   | T:0.324841   |
| chr28        | 9904554 | 2 | 306 | G:0.797386   | A:0.202614   |
| chr28        | 9904665 | 2 | 288 | CT:0.663194  | C:0.336806   |
| chr28        | 9905089 | 2 | 304 | C:0.677632   | A:0.322368   |
| chr28        | 9905601 | 2 | 310 | A:0.796774   | T:0.203226   |
| chr28        | 9905625 | 2 | 312 | T:0.320513   | C:0.679487   |
| chr28        | 9906398 | 3 | 272 | C:0.305147   | CA:0.371324  |
| CAA:0.323529 |         |   |     |              |              |
| chr28        | 9906895 | 2 | 306 | T:0.852941   | A:0.147059   |

|                                       |         |   |     |                           |                |
|---------------------------------------|---------|---|-----|---------------------------|----------------|
| chr28                                 | 9908236 | 2 | 302 | C:0.996689                | T:0.00331126   |
| chr28                                 | 9908829 | 2 | 306 | TAC:0.862745              | T:0.137255     |
| chr28                                 | 9909116 | 2 | 306 | A:0.316993                | T:0.683007     |
| chr28                                 | 9909253 | 3 | 294 | TA:0.520408               | T:0.35034      |
| TAA:0.129252                          |         |   |     |                           |                |
| chr28                                 | 9909408 | 2 | 308 | G:0.340909                | A:0.659091     |
| chr28                                 | 9910182 | 2 | 306 | G:0.781046                | A:0.218954     |
| chr28                                 | 9910194 | 2 | 308 | T:0.957792                | C:0.0422078    |
| chr28                                 | 9910897 | 2 | 310 | C:0.7 CAA:0.3             |                |
| chr28                                 | 9910907 | 2 | 310 | A:0.983871                | C:0.016129     |
| chr28                                 | 9910908 | 2 | 308 | C:0.50974                 | A:0.49026      |
| chr28                                 | 9911166 | 2 | 310 | TACAGAC:0.325806          | T:0.674194     |
| chr28                                 | 9911617 | 2 | 302 | C:0.649007                | A:0.350993     |
| chr28                                 | 9912096 | 2 | 250 | TA:0.608 T:0.392          |                |
| chr28                                 | 9912205 | 2 | 300 | C:0.8 T:0.2               |                |
| chr28                                 | 9912296 | 2 | 304 | G:0.973684                | A:0.0263158    |
| chr28                                 | 9912299 | 2 | 306 | C:0.993464                | A:0.00653595   |
| chr28                                 | 9912740 | 2 | 308 | G:0.970779                | A:0.0292208    |
| chr28                                 | 9913290 | 2 | 302 | G:0.960265                | A:0.0397351    |
| chr28                                 | 9914398 | 2 | 298 | G:0.946309                | GA:0.0536913   |
| chr28                                 | 9914533 | 2 | 298 | C:0.765101                | CT:0.234899    |
| chr28                                 | 9914702 | 2 | 302 | C:0.688742                | T:0.311258     |
| chr28                                 | 9915736 | 3 | 306 | T:0.405229                | TA:0.447712    |
| TAA:0.147059                          |         |   |     |                           |                |
| chr28                                 | 9916602 | 2 | 302 | C:0.788079                | T:0.211921     |
| chr28                                 | 9916893 | 2 | 312 | AGG:0.673077              | A:0.326923     |
| chr28                                 | 9916896 | 2 | 312 | T:0.673077                | TAG:0.326923   |
| chr28                                 | 9916898 | 3 | 312 | AAATGAT:0.0416667         | A:             |
| 0.307692 ATAGTAATGAT:0.650641         |         |   |     |                           |                |
| chr28                                 | 9917159 | 2 | 300 | G:0.31 A:0.69             |                |
| chr28                                 | 9917550 | 2 | 302 | G:0.794702                | A:0.205298     |
| chr28                                 | 9917873 | 2 | 312 | T:0.798077                | A:0.201923     |
| chr28                                 | 9917902 | 2 | 312 | C:0.464744                | CCA:0.535256   |
| chr28                                 | 9917957 | 2 | 306 | C:0.477124                | G:0.522876     |
| chr28                                 | 9918034 | 2 | 308 | C:0.655844                | T:0.344156     |
| chr28                                 | 9918417 | 2 | 302 | A:0.642384                | G:0.357616     |
| chr28                                 | 9918510 | 4 | 320 | ATGTGTGTG:0.3375          | A:0.334375     |
| ATGTGTG:0.190625 ATGTGTGTGTGTG:0.1375 |         |   |     |                           |                |
| chr28                                 | 9918860 | 2 | 310 | T:0.664516                | C:0.335484     |
| chr28                                 | 9918865 | 2 | 312 | T:0.679487                | TA:0.320513    |
| chr28                                 | 9920614 | 2 | 298 | G:0.939597                | C:0.0604027    |
| chr28                                 | 9920691 | 2 | 296 | A:0.665541                | C:0.334459     |
| chr28                                 | 9921321 | 2 | 304 | A:0.664474                | G:0.335526     |
| chr28                                 | 9921393 | 2 | 312 | A:0.846154                | T:0.153846     |
| chr28                                 | 9921431 | 2 | 310 | T:0.990323                | TA:0.00967742  |
| chr28                                 | 9921727 | 2 | 316 | A:0.85443                 | T:0.14557      |
| chr28                                 | 9921736 | 2 | 316 | T:0.471519                | TAAAG:0.528481 |
| chr28                                 | 9921988 | 2 | 308 | G:0.665584                | A:0.334416     |
| chr28                                 | 9922247 | 3 | 316 | GAGAAAGAA:0.322785        | G:             |
| 0.525316 GAGAA:0.151899               |         |   |     |                           |                |
| chr28                                 | 9922309 | 2 | 316 | GAGA:0.829114             | G:0.170886     |
| chr28                                 | 9922312 | 2 | 292 | AAAAG:0.873288            | A:0.126712     |
| chr28                                 | 9922350 | 2 | 316 | AAGAAAGAAAGAAAAG:0.829114 |                |
| A:0.170886                            |         |   |     |                           |                |

|                        |         |   |                                |                        |                  |
|------------------------|---------|---|--------------------------------|------------------------|------------------|
| chr28                  | 9922389 | 3 | 318                            | AAAAGAAAGAAAG:0.754717 | A:               |
| 0.157233               |         |   | AAAAGAAAG:0.0880503            |                        |                  |
| chr28                  | 9922484 | 2 | 308                            | A:0.711039             | AAACAAC:0.288961 |
| chr28                  | 9922491 | 2 | 308                            | A:0.808442             | T:0.191558       |
| chr28                  | 9923102 | 2 | 302                            | C:0.980132             | T:0.0198675      |
| chr28                  | 9923322 | 2 | 302                            | A:0.672185             | G:0.327815       |
| chr28                  | 9923729 | 2 | 298                            | G:0.973154             | GA:0.0268456     |
| chr28                  | 9924429 | 2 | 310                            | T:0.33871              | C:0.66129        |
| chr28                  | 9924670 | 2 | 292                            | G:0.671233             | GA:0.328767      |
| chr28                  | 9925035 | 2 | 312                            | T:0.669872             | C:0.330128       |
| chr28                  | 9925087 | 2 | 316                            | C:0.816456             | T:0.183544       |
| chr28                  | 9925180 | 2 | 318                            | A:0.679245             | T:0.320755       |
| chr28                  | 9925490 | 2 | 308                            | G:0.672078             | C:0.327922       |
| chr28                  | 9925725 | 2 | 304                            | T:0.457237             | C:0.542763       |
| chr28                  | 9927365 | 2 | 316                            | T:0.477848             | C:0.522152       |
| chr28                  | 9927462 | 2 | 312                            | AAT:0.967949           | A:0.0320513      |
| chr28                  | 9927599 | 2 | 304                            | C:0.8125               | T:0.1875         |
| chr28                  | 9928055 | 2 | 308                            | A:0.818182             | T:0.181818       |
| chr28                  | 9928142 | 2 | 318                            | A:0.996855             | T:0.00314465     |
| chr28                  | 9928654 | 2 | 302                            | C:0.0761589            | T:0.923841       |
| chr28                  | 9929062 | 2 | 296                            | CCTCT:0.358108         | C:0.641892       |
| chr28                  | 9929534 | 2 | 292                            | CAAAA:0.715753         | C:0.284247       |
| chr28                  | 9929677 | 2 | 160                            | T:0.7125               | TA:0.2875        |
| chr28                  | 9930040 | 2 | 298                            | TA:0.308725            | T:0.691275       |
| chr28                  | 9930276 | 2 | 304                            | TA:0.483553            | T:0.516447       |
| chr28                  | 9931128 | 2 | 206                            | TA:0.626214            | T:0.373786       |
| chr28                  | 9932271 | 2 | 308                            | C:0.331169             | T:0.668831       |
| chr28                  | 9932368 | 2 | 296                            | T:0.827703             | C:0.172297       |
| chr28                  | 9932584 | 2 | 292                            | T:0.688356             | C:0.311644       |
| chr28                  | 9932724 | 2 | 286                            | C:0.688811             | G:0.311189       |
| chr28                  | 9932870 | 6 | 316                            | AATAGATAG:0.148734     | A:               |
| 0.0822785              |         |   | AATAG:0.0727848                | AATAGATAGATAG:0.262658 |                  |
| AATAGATAGATAGATAG:0.25 |         |   | AATAGATAGATAGATAGATAG:0.183544 |                        |                  |
| chr28                  | 9934201 | 2 | 310                            | G:0.977419             | A:0.0225806      |
| chr28                  | 9934316 | 2 | 304                            | C:0.799342             | T:0.200658       |
| chr28                  | 9934493 | 2 | 310                            | A:0.309677             | G:0.690323       |
| chr28                  | 9934961 | 2 | 286                            | C:0.332168             | CA:0.667832      |
| chr28                  | 9935090 | 2 | 308                            | AT:0.866883            | A:0.133117       |
| chr28                  | 9935179 | 2 | 294                            | G:0.319728             | A:0.680272       |
| chr28                  | 9935476 | 2 | 306                            | T:0.862745             | G:0.137255       |
| chr28                  | 9935849 | 3 | 292                            | T:0.684932             | TA:0.287671      |
| TAA:0.0273973          |         |   |                                |                        |                  |
| chr28                  | 9936028 | 2 | 314                            | GA:0                   | G:1              |
| chr28                  | 9936036 | 2 | 314                            | G:0                    | GA:1             |
| chr28                  | 9936130 | 2 | 304                            | G:0.651316             | A:0.348684       |
| chr28                  | 9938943 | 3 | 304                            | C:0.733553             | CA:0.0394737     |
| CAA:0.226974           |         |   |                                |                        |                  |
| chr28                  | 9939204 | 2 | 286                            | AAC:0.727273           | A:0.272727       |
| chr28                  | 9939206 | 2 | 284                            | C:0.901408             | A:0.0985915      |
| chr28                  | 9940272 | 2 | 298                            | A:0.808725             | G:0.191275       |
| chr28                  | 9940348 | 2 | 304                            | TTTC:0.802632          | T:0.197368       |
| chr28                  | 9942369 | 2 | 314                            | GGAGA:0.980892         | G:0.0191083      |
| chr28                  | 9944305 | 2 | 306                            | T:0.676471             | C:0.323529       |
| chr28                  | 9945252 | 2 | 292                            | T:0.506849             | C:0.493151       |



|                                       |         |   |     |                          |                 |
|---------------------------------------|---------|---|-----|--------------------------|-----------------|
| chr28                                 | 9945832 | 2 | 308 | TA:0.311688              | T:0.688312      |
| chr28                                 | 9947583 | 2 | 312 | T:0.983974               | C:0.0160256     |
| chr28                                 | 9947736 | 3 | 310 | A:0.525806               | AG:0.332258     |
| AGG:0.141935                          |         |   |     |                          |                 |
| chr28                                 | 9947747 | 3 | 314 | A:0.321656               | AG:0.538217     |
| G:0.140127                            |         |   |     |                          |                 |
| chr28                                 | 9947926 | 2 | 300 | C:0.986667               | A:0.0133333     |
| chr28                                 | 9947989 | 2 | 300 | C:0.823333               | CA:0.176667     |
| chr28                                 | 9948544 | 2 | 300 | A:0.996667               | C:0.00333333    |
| chr28                                 | 9949016 | 2 | 304 | ACAAT:0.335526           | A:0.664474      |
| chr28                                 | 9949084 | 2 | 310 | A:0.33871                | AT:0.66129      |
| chr28                                 | 9949465 | 2 | 306 | T:0.813725               | A:0.186275      |
| chr28                                 | 9950701 | 2 | 298 | T:0.97651                | C:0.0234899     |
| chr28                                 | 9951013 | 2 | 290 | A:0.686207               | G:0.313793      |
| chr28                                 | 9951541 | 2 | 290 | C:0.410345               | CCTCT:0.589655  |
| chr28                                 | 9952690 | 2 | 308 | C:0.795455               | T:0.204545      |
| chr28                                 | 9953010 | 2 | 308 | A:0.983766               | T:0.0162338     |
| chr28                                 | 9953318 | 2 | 262 | CCT:0.263359             | C:0.736641      |
| chr28                                 | 9953671 | 2 | 314 | C:0.869427               | T:0.130573      |
| chr28                                 | 9953923 | 3 | 306 | G:0.660131               | GA:0.24183      |
| GAA:0.0980392                         |         |   |     |                          |                 |
| chr28                                 | 9954492 | 2 | 300 | G:0.663333               | GA:0.336667     |
| chr28                                 | 9954881 | 2 | 304 | T:0.6875                 | G:0.3125        |
| chr28                                 | 9954891 | 2 | 298 | AT:0.828859              | A:0.171141      |
| chr28                                 | 9954901 | 2 | 300 | T:0.696667               | A:0.303333      |
| chr28                                 | 9955119 | 2 | 296 | T:0.672297               | TA:0.327703     |
| chr28                                 | 9955544 | 2 | 306 | G:0.816993               | T:0.183007      |
| chr28                                 | 9955881 | 2 | 308 | C:0.688312               | G:0.311688      |
| chr28                                 | 9956105 | 2 | 292 | C:0.962329               | T:0.0376712     |
| chr28                                 | 9956137 | 3 | 302 | G:0.384106               | GTCTC:0.211921  |
| GTCTCTC:0.403974                      |         |   |     |                          |                 |
| chr28                                 | 9956173 | 2 | 294 | TA:0.346939              | T:0.653061      |
| chr28                                 | 9956424 | 2 | 298 | A:0.325503               | G:0.674497      |
| chr28                                 | 9956653 | 2 | 288 | C:0.3125                 | T:0.6875        |
| chr28                                 | 9957148 | 2 | 310 | T:0.332258               | C:0.667742      |
| chr28                                 | 9957756 | 2 | 284 | T:0.672535               | A:0.327465      |
| chr28                                 | 9957779 | 2 | 300 | T:0.933333               | TAAAA:0.0666667 |
| chr28                                 | 9957785 | 2 | 304 | T:0.865132               | TAA:0.134868    |
| chr28                                 | 9957787 | 2 | 302 | A:0.665563               | AAT:0.334437    |
| chr28                                 | 9957794 | 3 | 302 | TA:0.433775              | AA:0.231788     |
| T:0.334437                            |         |   |     |                          |                 |
| chr28                                 | 9957796 | 2 | 284 | A:0.841549               | AT:0.158451     |
| chr28                                 | 9957802 | 2 | 302 | A:0.665563               | T:0.334437      |
| chr28                                 | 9957821 | 2 | 302 | T:0.665563               | C:0.334437      |
| chr28                                 | 9957952 | 5 | 308 | CCTCTCTCTCTCTCTCTCT:0.25 | C:              |
| 0.418831 CCTCTCTCTCTCTCTCTCT:0.207792 |         |   |     |                          |                 |
| CCTCTCTCTCTCTCTCTCT:0.0487013         |         |   |     |                          |                 |
| chr28                                 | 9958001 | 2 | 292 | CATAA:0.623288           | C:0.376712      |
| chr28                                 | 9958025 | 3 | 308 | A:0.886364               | C:0.0811688     |
| AATAC:0.0324675                       |         |   |     |                          |                 |
| chr28                                 | 9958242 | 2 | 296 | CT:0.956081              | C:0.0439189     |
| chr28                                 | 9958526 | 2 | 308 | A:0.321429               | T:0.678571      |
| chr28                                 | 9958909 | 2 | 310 | C:0.806452               | T:0.193548      |
| chr28                                 | 9959119 | 2 | 304 | T:0.332237               | C:0.667763      |

|                                                                      |         |   |     |                      |                |
|----------------------------------------------------------------------|---------|---|-----|----------------------|----------------|
| chr28                                                                | 9959432 | 2 | 298 | G:0.667785           | A:0.332215     |
| chr28                                                                | 9959710 | 2 | 310 | C:0.983871           | G:0.016129     |
| chr28                                                                | 9959963 | 2 | 308 | T:0.685065           | C:0.314935     |
| chr28                                                                | 9960316 | 2 | 296 | TA:0.638514          | T:0.361486     |
| chr28                                                                | 9960317 | 2 | 302 | A:0.698675           | T:0.301325     |
| chr28                                                                | 9960471 | 2 | 288 | TG:0.989583          | T:0.0104167    |
| chr28                                                                | 9960605 | 3 | 288 | TA:0.534722          | T:0.149306     |
| TAA:0.315972                                                         |         |   |     |                      |                |
| chr28                                                                | 9960622 | 2 | 304 | T:0.358553           | TCTG:0.641447  |
| chr28                                                                | 9960700 | 2 | 304 | G:0.802632           | A:0.197368     |
| chr28                                                                | 9960975 | 2 | 298 | A:0.926174           | T:0.0738255    |
| chr28                                                                | 9961089 | 2 | 308 | C:0.701299           | T:0.298701     |
| chr28                                                                | 9961105 | 2 | 312 | C:0.839744           | T:0.160256     |
| chr28                                                                | 9961338 | 2 | 316 | A:0.341772           | AG:0.658228    |
| chr28                                                                | 9961482 | 2 | 314 | C:0.684713           | CT:0.315287    |
| chr28                                                                | 9961588 | 2 | 312 | T:0.958333           | TC:0.0416667   |
| chr28                                                                | 9961876 | 2 | 304 | A:0.680921           | G:0.319079     |
| chr28                                                                | 9962049 | 2 | 302 | CAT:0.788079         | C:0.211921     |
| chr28                                                                | 9962281 | 2 | 280 | CCT:0.825            | C:0.175        |
| chr28                                                                | 9962470 | 2 | 298 | T:0.862416           | C:0.137584     |
| chr28                                                                | 9962583 | 2 | 320 | A:0.98125            |                |
| AAGACATCACCCAGTCTACGGCCATAACCACCTGAACGCGCCCGATCTCGTCTGATCTCGGAAGCTAA |         |   |     |                      |                |
| GCAGGGTCGGGCCTGGTTAGTACTTGGATGGG:0.01875                             |         |   |     |                      |                |
| chr28                                                                | 9962672 | 2 | 310 | T:0.680645           | C:0.319355     |
| chr28                                                                | 9963026 | 2 | 304 | C:0.703947           | T:0.296053     |
| chr28                                                                | 9963417 | 2 | 302 | C:0.639073           | T:0.360927     |
| chr28                                                                | 9963449 | 2 | 304 | G:0.976974           | A:0.0230263    |
| chr28                                                                | 9963862 | 2 | 314 | C:0.464968           | T:0.535032     |
| chr28                                                                | 9964118 | 2 | 308 | C:0.672078           | A:0.327922     |
| chr28                                                                | 9964363 | 2 | 302 | T:0.68543            | C:0.31457      |
| chr28                                                                | 9964449 | 2 | 314 | C:0.678344           | CCTCT:0.321656 |
| chr28                                                                | 9964485 | 4 | 296 | T:0.368243           | TA:0.361486    |
| TAA:0.233108      TAAA:0.0371622                                     |         |   |     |                      |                |
| chr28                                                                | 9964630 | 2 | 302 | C:0.824503           | CCTCT:0.175497 |
| chr28                                                                | 9964740 | 2 | 316 | GA:0.243671          | G:0.756329     |
| chr28                                                                | 9964838 | 2 | 306 | A:0.313725           | G:0.686275     |
| chr28                                                                | 9965642 | 2 | 302 | G:0.642384           | A:0.357616     |
| chr28                                                                | 9965676 | 2 | 300 | G:0.663333           | C:0.336667     |
| chr28                                                                | 9967175 | 2 | 308 | A:0.967532           | G:0.0324675    |
| chr28                                                                | 9968483 | 2 | 312 | A:0.663462           | G:0.336538     |
| chr28                                                                | 9969013 | 2 | 314 | T:0.496815           | C:0.503185     |
| chr28                                                                | 9969507 | 2 | 294 | AAAG:0.982993        | A:0.0170068    |
| chr28                                                                | 9969512 | 2 | 294 | A:0.979592           | C:0.0204082    |
| chr28                                                                | 9969777 | 3 | 312 | AAC:0.689103         | A:0.102564     |
| AACACAC:0.208333                                                     |         |   |     |                      |                |
| chr28                                                                | 9969871 | 2 | 306 | G:0.924837           | A:0.0751634    |
| chr28                                                                | 9969879 | 2 | 302 | T:0.208609           | C:0.791391     |
| chr28                                                                | 9970039 | 2 | 300 | CGGGAGCCCCGCGAT:0.03 | C:0.97         |
| chr28                                                                | 9971287 | 2 | 210 | G:0.614286           | T:0.385714     |
| chr28                                                                | 9971366 | 2 | 246 | C:0.703252           | A:0.296748     |
| chr28                                                                | 9971397 | 2 | 228 | G:0.714912           | T:0.285088     |
| chr28                                                                | 9971574 | 2 | 276 | C:0.612319           | A:0.387681     |
| chr28                                                                | 9971681 | 2 | 276 | G:0.757246           | C:0.242754     |
| chr28                                                                | 9971687 | 2 | 274 | A:0.755474           | C:0.244526     |

|                   |         |                |     |                |                |
|-------------------|---------|----------------|-----|----------------|----------------|
| chr28             | 9972155 | 2              | 294 | C:0.965986     | CTTT:0.0340136 |
| chr28             | 9972167 | 2              | 292 | T:0.791096     | TTA:0.208904   |
| chr28             | 9972180 | 2              | 290 | C:0.631034     | T:0.368966     |
| chr28             | 9972222 | 2              | 296 | A:0.929054     | T:0.0709459    |
| chr28             | 9972623 | 2              | 298 | AT:0.942953    | A:0.057047     |
| chr28             | 9972653 | 4              | 302 | GT:0.192053    | G:0.466887     |
| GTTT:0.13245      |         | GTTTT:0.208609 |     |                |                |
| chr28             | 9972690 | 3              | 292 | CAGAG:0.630137 | C:0.287671     |
| CAGAGAG:0.0821918 |         |                |     |                |                |
| chr28             | 9973458 | 2              | 312 | G:0.788462     | A:0.211538     |
| chr28             | 9973537 | 2              | 308 | A:0.642857     | AAC:0.357143   |
| chr28             | 9973915 | 2              | 308 | C:0.876623     | CAA:0.123377   |
| chr28             | 9974638 | 2              | 306 | T:0.598039     | C:0.401961     |
| chr28             | 9974833 | 2              | 304 | C:0.621711     | T:0.378289     |
| chr28             | 9974848 | 2              | 304 | C:0.973684     | T:0.0263158    |
| chr28             | 9974904 | 2              | 300 | A:0.04 G:0.96  |                |
| chr28             | 9974936 | 2              | 300 | C:0.606667     | T:0.393333     |
| chr28             | 9975592 | 3              | 300 | C:0.773333     | CACAG:0.14     |
| CACACAG:0.0866667 |         |                |     |                |                |
| chr28             | 9975627 | 2              | 262 | A:0.698473     | G:0.301527     |
| chr28             | 9975839 | 2              | 300 | T:0.896667     | C:0.103333     |
| chr28             | 9975887 | 2              | 298 | T:0.610738     | C:0.389262     |
| chr28             | 9975979 | 2              | 304 | A:0.595395     | C:0.404605     |
| chr28             | 9976067 | 2              | 312 | A:0.608974     | T:0.391026     |
| chr28             | 9976079 | 2              | 312 | C:0.608974     | T:0.391026     |
| chr28             | 9976406 | 2              | 308 | T:0.613636     | A:0.386364     |
| chr28             | 9976412 | 2              | 308 | T:0.613636     | C:0.386364     |
| chr28             | 9976549 | 2              | 290 | C:0.6 T:0.4    |                |
| chr28             | 9976570 | 2              | 284 | GTC:0.640845   | G:0.359155     |
| chr28             | 9976621 | 2              | 306 | T:0.686275     | G:0.313725     |
| chr28             | 9976866 | 2              | 300 | T:0.586667     | TAG:0.413333   |
| chr28             | 9977173 | 2              | 302 | G:0.956954     | A:0.0430464    |
| chr28             | 9977269 | 2              | 306 | G:0.578431     | A:0.421569     |
| chr28             | 9977368 | 2              | 302 | G:0.599338     | A:0.400662     |
| chr28             | 9977531 | 2              | 308 | C:0.61039      | CA:0.38961     |
| chr28             | 9977551 | 3              | 310 | C:0.874194     | CA:0.0774194   |
| CAA:0.0483871     |         |                |     |                |                |
| chr28             | 9977615 | 2              | 310 | T:0.63871      | C:0.36129      |
| chr28             | 9977652 | 2              | 310 | G:0.980645     | A:0.0193548    |
| chr28             | 9977724 | 2              | 292 | G:0.589041     | A:0.410959     |
| chr28             | 9977937 | 2              | 308 | A:0.607143     | G:0.392857     |
| chr28             | 9978248 | 2              | 306 | A:0.627451     | G:0.372549     |
| chr28             | 9978328 | 2              | 306 | A:0.901961     | G:0.0980392    |
| chr28             | 9978417 | 2              | 308 | T:0.594156     | C:0.405844     |
| chr28             | 9978479 | 2              | 304 | A:0.980263     | G:0.0197368    |
| chr28             | 9978950 | 2              | 306 | T:0.611111     | C:0.388889     |
| chr28             | 9979983 | 2              | 292 | C:0.979452     | T:0.0205479    |
| chr28             | 9980549 | 2              | 298 | C:0.714765     | T:0.285235     |
| chr28             | 9980829 | 2              | 288 | T:0.583333     | C:0.416667     |
| chr28             | 9980925 | 2              | 300 | C:0.993333     | T:0.00666667   |
| chr28             | 9981357 | 2              | 298 | G:0.986577     | A:0.0134228    |
| chr28             | 9981483 | 2              | 288 | G:0.878472     | A:0.121528     |
| chr28             | 9981866 | 2              | 308 | A:0.980519     | ATCCCTGGG:     |
| 0.0194805         |         |                |     |                |                |

|                |         |   |     |                  |              |
|----------------|---------|---|-----|------------------|--------------|
| chr28          | 9981870 | 2 | 308 | C:0.980519       | CGCAGCGGT:   |
| 0.0194805      |         |   |     |                  |              |
| chr28          | 9981975 | 2 | 302 | T:0.596026       | C:0.403974   |
| chr28          | 9982005 | 2 | 298 | A:0.620805       | G:0.379195   |
| chr28          | 9982050 | 2 | 302 | C:0.910596       | T:0.089404   |
| chr28          | 9982104 | 2 | 306 | C:0.584967       | T:0.415033   |
| chr28          | 9982112 | 2 | 306 | G:0.584967       | A:0.415033   |
| chr28          | 9982162 | 3 | 302 | CCTCTCT:0.417219 | C:0.433775   |
| CCTCT:0.149007 |         |   |     |                  |              |
| chr28          | 9982193 | 2 | 290 | C:0.572414       | G:0.427586   |
| chr28          | 9982831 | 2 | 304 | C:0.575658       | G:0.424342   |
| chr28          | 9982863 | 2 | 310 | C:0.606452       | T:0.393548   |
| chr28          | 9983073 | 2 | 290 | C:0.6            | T:0.4        |
| chr28          | 9983260 | 2 | 302 | G:0.549669       | A:0.450331   |
| chr28          | 9983295 | 2 | 284 | C:0.721831       | A:0.278169   |
| chr28          | 9983396 | 2 | 304 | G:0.980263       | A:0.0197368  |
| chr28          | 9983522 | 2 | 308 | G:0.594156       | A:0.405844   |
| chr28          | 9983533 | 2 | 302 | T:0.57947        | C:0.42053    |
| chr28          | 9983570 | 2 | 308 | C:0.574675       | T:0.425325   |
| chr28          | 9984009 | 2 | 306 | T:0.598039       | C:0.401961   |
| chr28          | 9984025 | 2 | 314 | G:0.601911       | A:0.398089   |
| chr28          | 9984223 | 2 | 308 | C:0.987013       | G:0.012987   |
| chr28          | 9984291 | 2 | 300 | C:0.573333       | G:0.426667   |
| chr28          | 9984452 | 2 | 306 | T:0.98366        | C:0.0163399  |
| chr28          | 9984534 | 2 | 310 | C:0.603226       | G:0.396774   |
| chr28          | 9984633 | 2 | 302 | G:0.97351        | A:0.0264901  |
| chr28          | 9984635 | 2 | 302 | G:0.609272       | C:0.390728   |
| chr28          | 9984850 | 2 | 312 | C:0.987179       | T:0.0128205  |
| chr28          | 9984907 | 2 | 290 | T:0.734483       | TA:0.265517  |
| chr28          | 9985389 | 2 | 290 | A:0.97931        | G:0.0206897  |
| chr28          | 9985655 | 2 | 294 | G:0.982993       | A:0.0170068  |
| chr28          | 9985722 | 2 | 292 | T:0.140411       | C:0.859589   |
| chr28          | 9985736 | 2 | 290 | A:0.6            | T:0.4        |
| chr28          | 9985765 | 2 | 286 | T:0.975524       | A:0.0244755  |
| chr28          | 9985816 | 2 | 300 | T:0.98           | TA:0.02      |
| chr28          | 9986285 | 2 | 312 | C:0.714744       | T:0.285256   |
| chr28          | 9986551 | 2 | 304 | T:0.990132       | C:0.00986842 |
| chr28          | 9986841 | 2 | 298 | G:0.869128       | T:0.130872   |
| chr28          | 9986915 | 2 | 298 | C:0.97651        | G:0.0234899  |
| chr28          | 9987186 | 2 | 300 | T:0.62           | TAG:0.38     |
| chr28          | 9987300 | 2 | 306 | A:0.986928       | T:0.0130719  |
| chr28          | 9987449 | 2 | 302 | C:0.97351        | T:0.0264901  |
| chr28          | 9987855 | 2 | 312 | C:0.971154       | A:0.0288462  |
| chr28          | 9987877 | 2 | 310 | T:0.590323       | TA:0.409677  |
| chr28          | 9987927 | 3 | 304 | AT:0.611842      | A:0.128289   |
| ATT:0.259868   |         |   |     |                  |              |
| chr28          | 9988108 | 2 | 314 | A:0.984076       | T:0.0159236  |
| chr28          | 9988315 | 2 | 308 | T:0.993506       | C:0.00649351 |
| chr28          | 9988511 | 2 | 186 | C:0.446237       | CA:0.553763  |
| chr28          | 9989242 | 2 | 286 | T:0.986014       | A:0.013986   |
| chr28          | 9990006 | 2 | 306 | C:0.98366        | A:0.0163399  |
| chr28          | 9990178 | 2 | 310 | C:0.709677       | T:0.290323   |
| chr28          | 9990183 | 2 | 308 | C:0.571429       | T:0.428571   |
| chr28          | 9990416 | 2 | 296 | A:0.983108       | G:0.0168919  |

|                                        |          |                                |     |                            |                |
|----------------------------------------|----------|--------------------------------|-----|----------------------------|----------------|
| chr28                                  | 9990557  | 2                              | 302 | T:0.983444                 | A:0.0165563    |
| chr28                                  | 9990932  | 2                              | 300 | T:0.983333                 | C:0.0166667    |
| chr28                                  | 9990959  | 2                              | 296 | T:0.97973                  | C:0.0202703    |
| chr28                                  | 9990970  | 2                              | 296 | C:0.97973                  | T:0.0202703    |
| chr28                                  | 9991065  | 2                              | 302 | C:0.718543                 | T:0.281457     |
| chr28                                  | 9991102  | 2                              | 300 | T:0.706667                 | G:0.293333     |
| chr28                                  | 9991563  | 2                              | 304 | A:0.983553                 | T:0.0164474    |
| chr28                                  | 9991672  | 2                              | 302 | T:0.708609                 | C:0.291391     |
| chr28                                  | 9991885  | 2                              | 288 | C:0.975694                 | T:0.0243056    |
| chr28                                  | 9992325  | 2                              | 258 | C:0.581395                 | T:0.418605     |
| chr28                                  | 9992501  | 2                              | 162 | G:0.691358                 | A:0.308642     |
| chr28                                  | 9992546  | 2                              | 158 | AGGAGG:0.455696            | A:0.544304     |
| chr28                                  | 9992570  | 2                              | 158 | G:0.455696                 | A:0.544304     |
| chr28                                  | 9992722  | 2                              | 254 | G:0.555118                 | A:0.444882     |
| chr28                                  | 9992731  | 2                              | 254 | C:0.555118                 | A:0.444882     |
| chr28                                  | 9992882  | 2                              | 300 | A:0.986667                 | G:0.0133333    |
| chr28                                  | 9992924  | 2                              | 304 | G:0.601974                 | T:0.398026     |
| chr28                                  | 9992928  | 2                              | 304 | A:0.601974                 | G:0.398026     |
| chr28                                  | 9992963  | 2                              | 298 | A:0.573826                 | G:0.426174     |
| chr28                                  | 9993055  | 2                              | 286 | G:0.611888                 | A:0.388112     |
| chr28                                  | 9993060  | 2                              | 286 | C:0.611888                 | T:0.388112     |
| chr28                                  | 9993145  | 2                              | 298 | C:0.577181                 | T:0.422819     |
| chr28                                  | 9993279  | 2                              | 298 | G:0.590604                 | A:0.409396     |
| chr28                                  | 9993341  | 2                              | 292 | C:0.592466                 | T:0.407534     |
| chr28                                  | 9993410  | 2                              | 300 | T:0.573333                 | C:0.426667     |
| chr28                                  | 9993413  | 2                              | 300 | T:0.573333                 | TG:0.426667    |
| chr28                                  | 9993962  | 2                              | 302 | C:0.576159                 | T:0.423841     |
| chr28                                  | 9994647  | 2                              | 304 | C:0.740132                 | A:0.259868     |
| chr28                                  | 9994812  | 2                              | 298 | T:0.587248                 | C:0.412752     |
| chr28                                  | 9995928  | 2                              | 306 | G:0.604575                 | T:0.395425     |
| chr28                                  | 9996072  | 2                              | 304 | G:0.753289                 | A:0.246711     |
| chr28                                  | 9996290  | 2                              | 306 | G:0.715686                 | A:0.284314     |
| chr28                                  | 9996574  | 2                              | 310 | AAGC:0.73871               | A:0.26129      |
| chr28                                  | 9996642  | 2                              | 300 | T:0.596667                 | C:0.403333     |
| chr28                                  | 9997195  | 2                              | 288 | G:0.607639                 | T:0.392361     |
| chr28                                  | 9997477  | 2                              | 272 | C:0.764706                 | G:0.235294     |
| chr28                                  | 9997600  | 4                              | 314 | GATTTATTTATTTATTT:0.442675 |                |
| G:0.226115                             |          | GATTTATTTATTTATTTATTT:0.210191 |     |                            |                |
| GATTTATTTATTTATTTATTTATTTATTT:0.121019 |          |                                |     |                            |                |
| chr28                                  | 9997720  | 2                              | 258 | C:0.883721                 | T:0.116279     |
| chr28                                  | 9997873  | 4                              | 308 | T:0.616883                 | TCACA:0.146104 |
| TCACACA:0.201299                       |          | TCACACACA:0.0357143            |     |                            |                |
| chr28                                  | 9997890  | 2                              | 308 | C:0.902597                 | G:0.0974026    |
| chr28                                  | 9998077  | 2                              | 302 | C:0.768212                 | T:0.231788     |
| chr28                                  | 9998409  | 2                              | 308 | T:0.727273                 | C:0.272727     |
| chr28                                  | 9998552  | 2                              | 296 | A:0.591216                 | G:0.408784     |
| chr28                                  | 9999121  | 2                              | 292 | C:0.592466                 | T:0.407534     |
| chr28                                  | 10000713 | 2                              | 300 | G:0.986667                 | A:0.0133333    |
| chr28                                  | 10001026 | 2                              | 260 | TA:0.588462                | T:0.411538     |
| chr28                                  | 10002489 | 2                              | 298 | C:0.604027                 | T:0.395973     |
| chr28                                  | 10002497 | 2                              | 296 | GCTCT:0.675676             | G:0.324324     |
| chr28                                  | 10004928 | 2                              | 306 | GA:0.620915                | G:0.379085     |
| chr28                                  | 10004934 | 2                              | 306 | A:0.620915                 | G:0.379085     |
| chr28                                  | 10004977 | 2                              | 300 | T:0.756667                 | C:0.243333     |

|       |          |   |     |                            |                        |           |
|-------|----------|---|-----|----------------------------|------------------------|-----------|
| chr28 | 10005188 | 2 | 304 | C:0.615132                 | A:0.384868             |           |
| chr28 | 10005207 | 2 | 304 | A:0.631579                 | G:0.368421             |           |
| chr28 | 10005272 | 2 | 296 | A:0.621622                 | G:0.378378             |           |
| chr28 | 10005547 | 2 | 302 | A:0.612583                 | T:0.387417             |           |
| chr28 | 10005764 | 2 | 312 | A:0.733974                 | G:0.266026             |           |
| chr28 | 10006211 | 2 | 310 | C:0.619355                 | T:0.380645             |           |
| chr28 | 10006365 | 2 | 310 | T:0.609677                 | C:0.390323             |           |
| chr28 | 10006642 | 2 | 304 | C:0.618421                 | T:0.381579             |           |
| chr28 | 10006683 | 2 | 302 | G:0.721854                 | A:0.278146             |           |
| chr28 | 10006760 | 2 | 306 | T:0.624183                 | TAGCCA:0.375817        |           |
| chr28 | 10006950 | 2 | 306 | G:0.614379                 | A:0.385621             |           |
| chr28 | 10007006 | 2 | 298 | G:0.604027                 | T:0.395973             |           |
| chr28 | 10007231 | 2 | 300 | C:0.98                     | T:0.02                 |           |
| chr28 | 10007530 | 2 | 276 | G:0.601449                 | A:0.398551             |           |
| chr28 | 10007900 | 2 | 298 | G:0.607383                 | A:0.392617             |           |
| chr28 | 10008098 | 2 | 296 | G:0.820946                 | A:0.179054             |           |
| chr28 | 10008446 | 2 | 304 | C:0.730263                 | G:0.269737             |           |
| chr28 | 10009248 | 2 | 308 | A:0.597403                 | C:0.402597             |           |
| chr28 | 10009355 | 2 | 304 | A:0.595395                 | C:0.404605             |           |
| chr28 | 10009415 | 2 | 296 | C:0.591216                 | T:0.408784             |           |
| chr28 | 10009645 | 2 | 304 | G:0.618421                 | A:0.381579             |           |
| chr28 | 10009655 | 2 | 304 | T:0.618421                 | C:0.381579             |           |
| chr28 | 10010658 | 2 | 306 | A:0.611111                 | G:0.388889             |           |
| chr28 | 10010680 | 2 | 308 | G:0.623377                 | T:0.376623             |           |
| chr28 | 10010872 | 2 | 292 | C:0.613014                 | T:0.386986             |           |
| chr28 | 10011312 | 2 | 302 | G:0.60596                  | C:0.39404              |           |
| chr28 | 10011360 | 2 | 308 | T:0.983766                 | TCATC:0.0162338        |           |
| chr28 | 10012507 | 2 | 300 | T:0.94                     | C:0.06                 |           |
| chr28 | 10012544 | 2 | 302 | G:0.874172                 | A:0.125828             |           |
| chr28 | 10013329 | 2 | 314 | G:0.694268                 | T:0.305732             |           |
| chr28 | 10013461 | 2 | 298 | C:0.573826                 | G:0.426174             |           |
| chr28 | 10015175 | 2 | 300 | AT:0.576667                | A:0.423333             |           |
| chr28 | 10015379 | 2 | 290 | CT:0.793103                | C:0.206897             |           |
| chr28 | 10015437 | 2 | 298 | G:0.885906                 | A:0.114094             |           |
| chr28 | 10015601 | 2 | 304 | C:0.917763                 | CT:0.0822368           |           |
| chr28 | 10015852 | 2 | 284 | G:0.866197                 | C:0.133803             |           |
| chr28 | 10015955 | 2 | 304 | G:0.713816                 | A:0.286184             |           |
| chr28 | 10015988 | 2 | 294 | G:0.636054                 | A:0.363946             |           |
| chr28 | 10016418 | 2 | 308 | A:0.594156                 | G:0.405844             |           |
| chr28 | 10016464 | 2 | 292 | ACT:0.613014               | A:0.386986             |           |
| chr28 | 10016606 | 2 | 302 | G:0.850993                 | T:0.149007             |           |
| chr28 | 10016758 | 2 | 314 | A:0.729299                 | G:0.270701             |           |
| chr28 | 10016842 | 2 | 298 | T:0.755034                 | C:0.244966             |           |
| chr28 | 10017100 | 2 | 302 | A:0.903974                 | G:0.0960265            |           |
| chr28 | 10018096 | 2 | 306 | A:0.980392                 | G:0.0196078            |           |
| chr28 | 10018353 | 2 | 306 | G:0.764706                 | T:0.235294             |           |
| chr28 | 10020076 | 2 | 300 | A:0.616667                 | C:0.383333             |           |
| chr28 | 10020334 | 6 | 316 | ATTATTTATTTATTTATTTATT     | :0.357595              |           |
|       |          |   |     | A:0.158228                 | ATTATTTATTTATTTATTTATT | :0.107595 |
|       |          |   |     | ATATTTATTTATTTATTTATTTATT  | :0.199367              |           |
|       |          |   |     | ATTATTTATTTATTTATTTATTTATT | :0.123418              |           |
|       |          |   |     | ATATTTATTTATTTATTTATTTATT  | :0.0537975             |           |
| chr28 | 10020378 | 2 | 312 | T:0.849359                 | C:0.150641             |           |
| chr28 | 10020673 | 2 | 308 | T:0.600649                 | G:0.399351             |           |

|                    |            |     |                  |              |
|--------------------|------------|-----|------------------|--------------|
| chr28              | 10020828 2 | 294 | T:0.605442       | C:0.394558   |
| chr28              | 10021397 2 | 306 | C:0.728758       | T:0.271242   |
| chr28              | 10022282 2 | 302 | A:0.629139       | G:0.370861   |
| chr28              | 10023320 2 | 298 | G:0.610738       | A:0.389262   |
| chr28              | 10024839 2 | 308 | T:0.600649       | C:0.399351   |
| chr28              | 10024912 2 | 314 | C:0.605096       | T:0.394904   |
| chr28              | 10025008 2 | 306 | C:0.931373       | T:0.0686275  |
| chr28              | 10025114 2 | 304 | A:0.578947       | G:0.421053   |
| chr28              | 10025601 2 | 302 | T:0.589404       | C:0.410596   |
| chr28              | 10026279 2 | 304 | G:0.960526       | A:0.0394737  |
| chr28              | 10026946 2 | 308 | G:0.603896       | C:0.396104   |
| chr28              | 10027645 2 | 310 | C:0.906452       | T:0.0935484  |
| chr28              | 10027876 2 | 300 | T:0.636667       | C:0.363333   |
| chr28              | 10028796 2 | 310 | CCTCCA:0.635484  | C:0.364516   |
| chr28              | 10028803 2 | 310 | T:0.635484       | TA:0.364516  |
| chr28              | 10029083 2 | 298 | G:0.848993       | A:0.151007   |
| chr28              | 10029354 2 | 304 | G:0.763158       | A:0.236842   |
| chr28              | 10029920 2 | 314 | G:0.767516       | A:0.232484   |
| chr28              | 10029933 2 | 306 | GGA:0.944444     | G:0.0555556  |
| chr28              | 10030068 2 | 296 | G:0.628378       | A:0.371622   |
| chr28              | 10030773 2 | 278 | T:0.618705       | C:0.381295   |
| chr28              | 10030790 2 | 260 | C:0.796154       | CCT:0.203846 |
| chr28              | 10030838 2 | 274 | T:0.718978       | TAA:0.281022 |
| chr28              | 10030894 2 | 292 | T:0.866438       | A:0.133562   |
| chr28              | 10031113 2 | 306 | C:0.846405       | T:0.153595   |
| chr28              | 10031128 2 | 300 | G:0.943333       | A:0.0566667  |
| chr28              | 10031274 2 | 300 | G:0.616667       | A:0.383333   |
| chr28              | 10031469 2 | 306 | CATT:0.954248    | C:0.0457516  |
| chr28              | 10031581 2 | 302 | CA:0.854305      | C:0.145695   |
| chr28              | 10032164 2 | 304 | C:0.789474       | CA:0.210526  |
| chr28              | 10032818 2 | 300 | C:0.62 T:0.38    |              |
| chr28              | 10032927 2 | 288 | C:0.979167       | A:0.0208333  |
| chr28              | 10033520 2 | 306 | C:0.75817        | T:0.24183    |
| chr28              | 10034022 2 | 288 | A:0.833333       | T:0.166667   |
| chr28              | 10034024 2 | 290 | A:0.57931        | G:0.42069    |
| chr28              | 10034333 2 | 302 | G:0.980132       | A:0.0198675  |
| chr28              | 10034440 2 | 292 | CCT:0.84589      | C:0.15411    |
| chr28              | 10034758 2 | 296 | A:0.597973       | T:0.402027   |
| chr28              | 10035134 2 | 302 | CTCTT:0.97351    | C:0.0264901  |
| chr28              | 10035171 2 | 300 | A:0.983333       | G:0.0166667  |
| chr28              | 10035173 2 | 298 | TA:0.956376      | T:0.0436242  |
| chr28              | 10035182 2 | 302 | A:0.480132       | T:0.519868   |
| chr28              | 10035532 2 | 304 | G:0.855263       | A:0.144737   |
| chr28              | 10035735 2 | 286 | G:0.86014        | A:0.13986    |
| chr28              | 10035823 2 | 308 | AAAAAAT:0.616883 | A:0.383117   |
| chr28              | 10036775 2 | 308 | T:0.970779       | C:0.0292208  |
| chr28              | 10037636 2 | 298 | GC:0.986577      | G:0.0134228  |
| chr28              | 10037685 2 | 308 | T:0.63961        | C:0.36039    |
| chr28              | 10039396 3 | 306 | TTCTCTC:0.712418 | T:0.0588235  |
| TTCTCTCTC:0.228758 |            |     |                  |              |
| chr28              | 10040013 2 | 300 | C:0.986667       | G:0.0133333  |
| chr28              | 10040175 2 | 308 | A:0.577922       | T:0.422078   |
| chr28              | 10040882 2 | 312 | A:0.971154       | C:0.0288462  |
| chr28              | 10041010 2 | 310 | A:0.00645161     | G:0.993548   |

|              |          |   |     |                |              |
|--------------|----------|---|-----|----------------|--------------|
| chr28        | 10041310 | 2 | 318 | G:0.981132     | A:0.0188679  |
| chr28        | 10042479 | 2 | 304 | G:0.986842     | A:0.0131579  |
| chr28        | 10042569 | 2 | 308 | G:0.983766     | A:0.0162338  |
| chr28        | 10042632 | 2 | 306 | C:0.98366      | T:0.0163399  |
| chr28        | 10042747 | 2 | 308 | C:0.477273     | G:0.522727   |
| chr28        | 10043976 | 2 | 294 | A:0.455782     | G:0.544218   |
| chr28        | 10044855 | 2 | 294 | A:0.833333     | T:0.166667   |
| chr28        | 10044930 | 2 | 304 | A:0.855263     | T:0.144737   |
| chr28        | 10044931 | 2 | 304 | A:0.855263     | T:0.144737   |
| chr28        | 10044951 | 2 | 306 | C:0.673203     | T:0.326797   |
| chr28        | 10045052 | 2 | 292 | T:0.832192     | G:0.167808   |
| chr28        | 10045135 | 2 | 304 | T:0.838816     | A:0.161184   |
| chr28        | 10045151 | 2 | 304 | C:0.838816     | T:0.161184   |
| chr28        | 10045236 | 2 | 304 | GTAAA:0.842105 | G:0.157895   |
| chr28        | 10045498 | 2 | 302 | C:0.824503     | T:0.175497   |
| chr28        | 10045566 | 2 | 306 | T:0.820261     | A:0.179739   |
| chr28        | 10045661 | 2 | 308 | T:0.837662     | C:0.162338   |
| chr28        | 10045823 | 2 | 314 | A:0.840764     | G:0.159236   |
| chr28        | 10046105 | 2 | 300 | C:0.91         | T:0.09       |
| chr28        | 10046511 | 2 | 292 | C:0.811644     | CAA:0.188356 |
| chr28        | 10046531 | 2 | 286 | A:0.807692     | G:0.192308   |
| chr28        | 10046533 | 2 | 286 | AC:0.503497    | A:0.496503   |
| chr28        | 10046770 | 2 | 306 | C:0.686275     | T:0.313725   |
| chr28        | 10046871 | 2 | 298 | T:0.828859     | C:0.171141   |
| chr28        | 10046949 | 2 | 302 | C:0.817881     | T:0.182119   |
| chr28        | 10047007 | 2 | 306 | C:0.830065     | T:0.169935   |
| chr28        | 10047016 | 2 | 304 | GAA:0.832237   | G:0.167763   |
| chr28        | 10047087 | 2 | 304 | T:0.855263     | TG:0.144737  |
| chr28        | 10047088 | 2 | 292 | G:0.900685     | GT:0.0993151 |
| chr28        | 10047278 | 2 | 310 | T:0.483871     | C:0.516129   |
| chr28        | 10047881 | 2 | 300 | G:0.98         | A:0.02       |
| chr28        | 10049508 | 2 | 304 | G:0.845395     | T:0.154605   |
| chr28        | 10049599 | 2 | 258 | CTT:0.802326   | C:0.197674   |
| chr28        | 10050396 | 2 | 308 | T:0.850649     | C:0.149351   |
| chr28        | 10051303 | 2 | 302 | G:0.956954     | A:0.0430464  |
| chr28        | 10052597 | 2 | 282 | G:0.585106     | T:0.414894   |
| chr28        | 10052665 | 2 | 290 | T:0.613793     | G:0.386207   |
| chr28        | 10054158 | 2 | 290 | T:0.755172     | TA:0.244828  |
| chr28        | 10054168 | 2 | 290 | C:0.755172     | A:0.244828   |
| chr28        | 10054326 | 2 | 298 | A:0.436242     | T:0.563758   |
| chr28        | 10054423 | 2 | 302 | C:0.748344     | T:0.251656   |
| chr28        | 10054475 | 2 | 302 | A:0.721854     | C:0.278146   |
| chr28        | 10055778 | 2 | 306 | A:0.415033     | G:0.584967   |
| chr28        | 10057013 | 2 | 312 | G:0.974359     | A:0.025641   |
| chr28        | 10057327 | 2 | 302 | C:0.298013     | CTG:0.701987 |
| chr28        | 10057799 | 2 | 312 | T:0.817308     | G:0.182692   |
| chr28        | 10058016 | 2 | 294 | T:0.595238     | C:0.404762   |
| chr28        | 10058393 | 2 | 286 | G:0.835664     | A:0.164336   |
| chr28        | 10058485 | 2 | 300 | A:0.59         | T:0.41       |
| chr28        | 10059372 | 3 | 290 | C:0.248276     | CA:0.527586  |
| CAA:0.224138 |          |   |     |                |              |
| chr28        | 10060023 | 2 | 304 | G:0.838816     | T:0.161184   |
| chr28        | 10060123 | 2 | 302 | T:0.589404     | C:0.410596   |
| chr28        | 10060126 | 2 | 298 | AT:0.825503    | A:0.174497   |



|                  |          |   |     |                       |                  |
|------------------|----------|---|-----|-----------------------|------------------|
| chr28            | 10060315 | 2 | 296 | AG:0.834459           | A:0.165541       |
| chr28            | 10060710 | 2 | 302 | A:0.231788            | G:0.768212       |
| chr28            | 10061091 | 2 | 294 | G:0.595238            | A:0.404762       |
| chr28            | 10061284 | 3 | 294 | TA:0.578231           | T:0.391156       |
| TAAA:0.0306122   |          |   |     |                       |                  |
| chr28            | 10061832 | 2 | 318 | T:0.575472            | TA:0.424528      |
| chr28            | 10061836 | 2 | 298 | AAATTAATT:0.842282    | A:               |
| 0.157718         |          |   |     |                       |                  |
| chr28            | 10061840 | 2 | 314 | T:0.83121             | A:0.16879        |
| chr28            | 10061883 | 2 | 306 | C:0.931373            | T:0.0686275      |
| chr28            | 10062552 | 2 | 298 | T:0.818792            | C:0.181208       |
| chr28            | 10062726 | 2 | 300 | GT:0.573333           | G:0.426667       |
| chr28            | 10062863 | 2 | 314 | T:0.00636943          | C:0.993631       |
| chr28            | 10063276 | 2 | 318 | A:0.836478            | AAT:0.163522     |
| chr28            | 10063583 | 2 | 304 | T:0.740132            | C:0.259868       |
| chr28            | 10064160 | 2 | 300 | GT:0.776667           | G:0.223333       |
| chr28            | 10064204 | 2 | 306 | C:0.493464            | CAGAGAG:0.506536 |
| chr28            | 10064491 | 2 | 310 | A:0.409677            | G:0.590323       |
| chr28            | 10064587 | 2 | 302 | T:0.804636            | TA:0.195364      |
| chr28            | 10064593 | 2 | 300 | AT:0.46               | A:0.54           |
| chr28            | 10064594 | 2 | 302 | T:0.804636            | A:0.195364       |
| chr28            | 10065475 | 2 | 284 | C:0.556338            | A:0.443662       |
| chr28            | 10065578 | 2 | 296 | A:0.442568            | G:0.557432       |
| chr28            | 10065761 | 2 | 288 | G:0.972222            | A:0.0277778      |
| chr28            | 10065988 | 2 | 294 | C:0.42517             | T:0.57483        |
| chr28            | 10066201 | 2 | 276 | TA:0.565217           | T:0.434783       |
| chr28            | 10066680 | 2 | 300 | GT:0.84               | G:0.16           |
| chr28            | 10066743 | 2 | 306 | A:0.598039            | G:0.401961       |
| chr28            | 10066979 | 2 | 298 | C:0.818792            | T:0.181208       |
| chr28            | 10067114 | 2 | 292 | C:0.565068            | T:0.434932       |
| chr28            | 10067307 | 2 | 304 | G:0.993421            | A:0.00657895     |
| chr28            | 10067941 | 2 | 298 | T:0.818792            | G:0.181208       |
| chr28            | 10067961 | 2 | 298 | T:0.818792            | A:0.181208       |
| chr28            | 10068042 | 2 | 306 | A:0.575163            | G:0.424837       |
| chr28            | 10068636 | 2 | 290 | T:0.241379            | C:0.758621       |
| chr28            | 10069175 | 2 | 270 | G:0.72963             | GA:0.27037       |
| chr28            | 10069892 | 2 | 282 | T:0.489362            | C:0.510638       |
| chr28            | 10070151 | 2 | 296 | C:0.962838            | T:0.0371622      |
| chr28            | 10070483 | 3 | 302 | CAAAA:0.86755         | C:0.0529801      |
| CAAAAA:0.0794702 |          |   |     |                       |                  |
| chr28            | 10070487 | 2 | 300 | A:0.833333            | C:0.166667       |
| chr28            | 10070720 | 2 | 300 | G:0.796667            | GT:0.203333      |
| chr28            | 10070728 | 2 | 300 | C:0.796667            | CT:0.203333      |
| chr28            | 10070746 | 2 | 308 | A:0.970779            | T:0.0292208      |
| chr28            | 10070777 | 2 | 302 | C:0.854305            | CAG:0.145695     |
| chr28            | 10070843 | 2 | 306 | G:0.53268             | A:0.46732        |
| chr28            | 10070878 | 2 | 314 | GGCTAAAGCGGC:0.789809 | G:               |
| 0.210191         |          |   |     |                       |                  |
| chr28            | 10070947 | 2 | 292 | G:0.794521            | A:0.205479       |
| chr28            | 10071041 | 2 | 304 | G:0.230263            | A:0.769737       |
| chr28            | 10071202 | 2 | 306 | G:0.803922            | A:0.196078       |
| chr28            | 10071317 | 2 | 306 | GA:0.781046           | G:0.218954       |
| chr28            | 10071810 | 2 | 310 | A:0.796774            | T:0.203226       |
| chr28            | 10072480 | 2 | 308 | G:0.785714            | A:0.214286       |

|                                                       |          |   |     |                            |                |
|-------------------------------------------------------|----------|---|-----|----------------------------|----------------|
| chr28                                                 | 10072523 | 2 | 306 | AT:0.80719                 | A:0.19281      |
| chr28                                                 | 10072534 | 2 | 292 | AT:0.972603                | A:0.0273973    |
| chr28                                                 | 10072535 | 2 | 306 | T:0.80719                  | A:0.19281      |
| chr28                                                 | 10072625 | 2 | 288 | C:0.791667                 | G:0.208333     |
| chr28                                                 | 10072630 | 2 | 288 | C:0.791667                 | T:0.208333     |
| chr28                                                 | 10072761 | 2 | 306 | A:0.46732                  | C:0.53268      |
| chr28                                                 | 10072909 | 2 | 312 | A:0.894231                 | ATGGG:0.105769 |
| chr28                                                 | 10072913 | 3 | 314 | GTGGA:0.535032             | G:0.43949      |
| GTGGATGGATGGA:0.0254777                               |          |   |     |                            |                |
| chr28                                                 | 10072942 | 3 | 318 | T:0.77673                  | TGGAAGGAA:     |
| 0.0691824 TGGATGGATGGAAGGAA:0.154088                  |          |   |     |                            |                |
| chr28                                                 | 10072989 | 2 | 312 | C:0.807692                 | T:0.192308     |
| chr28                                                 | 10073256 | 2 | 302 | C:0.768212                 | A:0.231788     |
| chr28                                                 | 10073257 | 2 | 302 | T:0.768212                 | TA:0.231788    |
| chr28                                                 | 10073634 | 2 | 220 | G:0.781818                 | A:0.218182     |
| chr28                                                 | 10073742 | 2 | 258 | G:0.771318                 | C:0.228682     |
| chr28                                                 | 10074158 | 2 | 316 | C:0.806962                 | G:0.193038     |
| chr28                                                 | 10074162 | 2 | 318 | G:0.981132                 | A:0.0188679    |
| chr28                                                 | 10074844 | 2 | 300 | T:0.826667                 | C:0.173333     |
| chr28                                                 | 10075230 | 2 | 292 | C:0.825342                 | T:0.174658     |
| chr28                                                 | 10075314 | 3 | 278 | CTT:0.327338               | C:0.118705     |
| CT:0.553957                                           |          |   |     |                            |                |
| chr28                                                 | 10075364 | 2 | 208 | G:0.6875                   | GT:0.3125      |
| chr28                                                 | 10075629 | 2 | 306 | C:0.826797                 | A:0.173203     |
| chr28                                                 | 10075750 | 2 | 304 | G:0.822368                 | A:0.177632     |
| chr28                                                 | 10076043 | 2 | 314 | C:0.802548                 | T:0.197452     |
| chr28                                                 | 10076045 | 2 | 314 | T:0.802548                 | A:0.197452     |
| chr28                                                 | 10076129 | 2 | 314 | T:0.980892                 | C:0.0191083    |
| chr28                                                 | 10076485 | 2 | 312 | T:0.971154                 | C:0.0288462    |
| chr28                                                 | 10076686 | 2 | 306 | G:0.813725                 | A:0.186275     |
| chr28                                                 | 10076703 | 2 | 308 | G:0.448052                 | A:0.551948     |
| chr28                                                 | 10076850 | 2 | 296 | C:0.800676                 | T:0.199324     |
| chr28                                                 | 10076853 | 2 | 296 | T:0.800676                 | C:0.199324     |
| chr28                                                 | 10076907 | 2 | 306 | C:0.79085                  | T:0.20915      |
| chr28                                                 | 10077169 | 2 | 314 | C:0.802548                 | T:0.197452     |
| chr28                                                 | 10077236 | 2 | 306 | A:0.970588                 | AT:0.0294118   |
| chr28                                                 | 10077237 | 2 | 306 | T:0.826797                 | TA:0.173203    |
| chr28                                                 | 10077324 | 2 | 296 | TG:0.814189                | T:0.185811     |
| chr28                                                 | 10078138 | 2 | 300 | C:0.813333                 | T:0.186667     |
| chr28                                                 | 10078199 | 2 | 290 | G:0.824138                 | A:0.175862     |
| chr28                                                 | 10078207 | 3 | 308 | TAAAAATAAATAAATA:0.909091  |                |
| T:0.0551948 TAATAAATA:0.0357143                       |          |   |     |                            |                |
| chr28                                                 | 10078210 | 5 | 310 | AAAATAAATAAATAAAT:0.477419 |                |
| A:0.0580645 AAAATAAAT:0.290323 AAAATAAATAAAT:0.125806 |          |   |     |                            |                |
| TAAATAAATAAATAAAT:0.0483871                           |          |   |     |                            |                |
| chr28                                                 | 10078261 | 2 | 304 | AT:0.986842                | A:0.0131579    |
| chr28                                                 | 10078263 | 2 | 304 | AAAT:0.986842              | A:0.0131579    |
| chr28                                                 | 10078526 | 2 | 296 | C:0.983108                 | T:0.0168919    |
| chr28                                                 | 10079795 | 2 | 312 | T:0.785256                 | C:0.214744     |
| chr28                                                 | 10080015 | 2 | 302 | CTG:0.976821               | C:0.0231788    |
| chr28                                                 | 10080029 | 2 | 302 | A:0.496689                 | G:0.503311     |
| chr28                                                 | 10080379 | 2 | 306 | TA:0.803922                | T:0.196078     |
| chr28                                                 | 10080459 | 2 | 296 | CCGA:0.804054              | C:0.195946     |
| chr28                                                 | 10080475 | 2 | 294 | C:0.846939                 | T:0.153061     |

|       |                             |     |                                    |                   |
|-------|-----------------------------|-----|------------------------------------|-------------------|
| chr28 | 10080691 2                  | 310 | C:0.987097                         | T:0.0129032       |
| chr28 | 10080746 2                  | 292 | G:0.811644                         | A:0.188356        |
| chr28 | 10080917 3                  | 300 | GCA:0.66 G:0.0633333               | GCACA:            |
|       | 0.276667                    |     |                                    |                   |
| chr28 | 10081526 2                  | 312 | G:0.24359                          | A:0.75641         |
| chr28 | 10081739 2                  | 310 | C:0.274194                         | CTTCTGAA:0.725806 |
| chr28 | 10081788 2                  | 306 | A:0.277778                         | G:0.722222        |
| chr28 | 10082157 2                  | 316 | CAGAGAGAGAG:0.303797               | C:                |
|       | 0.696203                    |     |                                    |                   |
| chr28 | 10082780 3                  | 302 | CAAATAAATAAATAAATAAATAAAT:0.112583 |                   |
|       | C:0.486755                  |     | CAAATAAAT:0.400662                 |                   |
| chr28 | 10082898 2                  | 178 | A:0.370787                         | AGGAG:0.629213    |
| chr28 | 10084653 2                  | 302 | C:0.970199                         | A:0.0298013       |
| chr28 | 10084683 2                  | 306 | C:0.25817                          | G:0.74183         |
| chr28 | 10084892 2                  | 310 | G:0.251613                         | T:0.748387        |
| chr28 | 10085050 2                  | 316 | T:0.275316                         | C:0.724684        |
| chr28 | 10085104 2                  | 306 | G:0.27451                          | A:0.72549         |
| chr28 | 10085310 2                  | 236 | CT:0.788136                        | C:0.211864        |
| chr28 | 10085343 2                  | 276 | C:0.485507                         | CT:0.514493       |
| chr28 | 10086152 2                  | 296 | T:0.304054                         | C:0.695946        |
| chr28 | 10086243 2                  | 300 | C:0.286667                         | T:0.713333        |
| chr28 | 10086541 2                  | 294 | C:0.979592                         | A:0.0204082       |
| chr28 | 10086599 2                  | 294 | C:0.401361                         | CCT:0.598639      |
| chr28 | 10086657 2                  | 300 | T:0.306667                         | TA:0.693333       |
| chr28 | 10086958 2                  | 318 | C:0.279874                         | G:0.720126        |
| chr28 | 10087380 2                  | 250 | CTT:0.872                          | C:0.128           |
| chr28 | 10087430 2                  | 276 | C:0.844203                         | CAG:0.155797      |
| chr28 | 10089009 2                  | 308 | GCT:0.266234                       | G:0.733766        |
| chr28 | 10089396 3                  | 304 | CCTCTCTCT:0.286184                 | C:                |
|       | 0.328947 CCT:0.384868       |     |                                    |                   |
| chr28 | 10089464 2                  | 292 | A:0.284247                         | G:0.715753        |
| chr28 | 10089623 2                  | 192 | TA:0.828125                        | T:0.171875        |
| chr28 | 10089847 3                  | 288 | GTCTC:0.309028                     | G:0.118056        |
|       | GTC:0.572917                |     |                                    |                   |
| chr28 | 10089900 2                  | 304 | A:0.309211                         | AAAAAG:0.690789   |
| chr28 | 10089994 2                  | 296 | T:0.263514                         | C:0.736486        |
| chr28 | 10090186 2                  | 286 | G:0.248252                         | T:0.751748        |
| chr28 | 10090333 2                  | 258 | G:0.468992                         | A:0.531008        |
| chr28 | 10090414 2                  | 244 | CCT:0.348361                       | C:0.651639        |
| chr28 | 10090458 3                  | 300 | A:0.896667                         | AAAAT:0.05        |
|       | AAAATAAAT:0.0533333         |     |                                    |                   |
| chr28 | 10090502 5                  | 312 | T:0.403846                         | TAAATA:0.221154   |
|       | TAAATAAATA:0.13141          |     | TAAATAAATAAATA:0.0737179           |                   |
|       | TAAATAAATAAATAAATA:0.169872 |     |                                    |                   |
| chr28 | 10091191 2                  | 264 | AAAAAAG:0.784091                   | A:0.215909        |
| chr28 | 10091192 2                  | 260 | AAAAAAG:0.523077                   | A:0.476923        |
| chr28 | 10091349 2                  | 268 | C:0.261194                         | A:0.738806        |
| chr28 | 10091547 2                  | 268 | T:0.320896                         | TCC:0.679104      |
| chr28 | 10091937 2                  | 270 | TTC:0.22963                        | T:0.77037         |
| chr28 | 10092104 2                  | 290 | C:0.244828                         | CA:0.755172       |
| chr28 | 10092126 2                  | 304 | T:0.289474                         | TAAAATA:0.710526  |
| chr28 | 10092158 2                  | 250 | T:0.952 TA:0.048                   |                   |
| chr28 | 10092160 2                  | 294 | A:0.877551                         | AAAATAAAT:        |
|       | 0.122449                    |     |                                    |                   |

|                |          |   |                                      |                      |                 |
|----------------|----------|---|--------------------------------------|----------------------|-----------------|
| chr28          | 10092165 | 2 | 250                                  | A:0.952              | AAAT:0.048      |
| chr28          | 10092348 | 2 | 258                                  | G:0.790698           | A:0.209302      |
| chr28          | 10092577 | 2 | 304                                  | A:0.279605           | ATAAAT:0.720395 |
| chr28          | 10092836 | 2 | 298                                  | T:0.285235           | A:0.714765      |
| chr28          | 10092850 | 2 | 298                                  | C:0.285235           | G:0.714765      |
| chr28          | 10093038 | 2 | 296                                  | GT:0.266892          | G:0.733108      |
| chr28          | 10093112 | 2 | 302                                  | A:0.278146           | AT:0.721854     |
| chr28          | 10093364 | 2 | 306                                  | A:0.254902           | C:0.745098      |
| chr28          | 10093366 | 2 | 306                                  | C:0.254902           | T:0.745098      |
| chr28          | 10093569 | 2 | 310                                  | G:0.287097           | C:0.712903      |
| chr28          | 10093578 | 2 | 310                                  | G:0.287097           | A:0.712903      |
| chr28          | 10093621 | 2 | 312                                  | G:0.266026           | A:0.733974      |
| chr28          | 10093670 | 2 | 316                                  | T:0.25               | C:0.75          |
| chr28          | 10093679 | 2 | 316                                  | G:0.974684           | A:0.0253165     |
| chr28          | 10093886 | 2 | 304                                  | C:0.766447           | CGCATT:0.233553 |
| chr28          | 10093997 | 2 | 304                                  | G:0.467105           | A:0.532895      |
| chr28          | 10094136 | 2 | 308                                  | G:0.438312           | A:0.561688      |
| chr28          | 10094540 | 2 | 304                                  | C:0.871711           | G:0.128289      |
| chr28          | 10094866 | 2 | 292                                  | G:0.825342           | GA:0.174658     |
| chr28          | 10095524 | 2 | 102                                  | C:0.509804           | G:0.490196      |
| chr28          | 10095808 | 2 | 260                                  | T:0.8                | A:0.2           |
| chr28          | 10095961 | 2 | 302                                  | C:0.794702           | A:0.205298      |
| chr28          | 10096511 | 5 | 316                                  | AAC:0.553797         | A:0.0348101     |
| AACAC:0.129747 |          |   | AACACAC:0.189873 AACACACAC:0.0917722 |                      |                 |
| chr28          | 10096535 | 2 | 304                                  | C:0.792763           | CAT:0.207237    |
| chr28          | 10096621 | 2 | 300                                  | A:0.79               | G:0.21          |
| chr28          | 10097262 | 2 | 300                                  | CA:0.926667          | C:0.0733333     |
| chr28          | 10098620 | 2 | 296                                  | G:0.810811           | A:0.189189      |
| chr28          | 10098707 | 2 | 298                                  | T:0.815436           | C:0.184564      |
| chr28          | 10099037 | 2 | 302                                  | G:0.81457            | C:0.18543       |
| chr28          | 10099202 | 2 | 306                                  | C:0.862745           | T:0.137255      |
| chr28          | 10099239 | 2 | 308                                  | T:0.801948           | TC:0.198052     |
| chr28          | 10099738 | 2 | 304                                  | G:0.8125             | T:0.1875        |
| chr28          | 10100126 | 2 | 294                                  | C:0.982993           | T:0.0170068     |
| chr28          | 10100782 | 2 | 300                                  | T:0.963333           | C:0.0366667     |
| chr28          | 10100882 | 2 | 306                                  | C:0.395425           | T:0.604575      |
| chr28          | 10101917 | 2 | 312                                  | T:0.814103           | TA:0.185897     |
| chr28          | 10102255 | 2 | 300                                  | C:0.806667           | T:0.193333      |
| chr28          | 10102743 | 2 | 312                                  | T:0.798077           | A:0.201923      |
| chr28          | 10103171 | 2 | 292                                  | G:0.982877           | A:0.0171233     |
| chr28          | 10103202 | 2 | 288                                  | TA:0.784722          | T:0.215278      |
| chr28          | 10103505 | 2 | 306                                  | T:0.803922           | C:0.196078      |
| chr28          | 10103578 | 2 | 300                                  | T:0.82               | A:0.18          |
| chr28          | 10103655 | 2 | 296                                  | G:0.804054           | A:0.195946      |
| chr28          | 10103847 | 2 | 302                                  | T:0.937086           | C:0.0629139     |
| chr28          | 10104001 | 2 | 294                                  | C:0.816327           | A:0.183673      |
| chr28          | 10104218 | 2 | 308                                  | T:0.811688           | C:0.188312      |
| chr28          | 10105506 | 2 | 290                                  | A:0                  | T:1             |
| chr28          | 10105512 | 2 | 290                                  | G:0                  | T:1             |
| chr28          | 10105531 | 2 | 304                                  | C:0.976974           | T:0.0230263     |
| chr28          | 10105576 | 2 | 304                                  | A:0.838816           | AT:0.161184     |
| chr28          | 10105579 | 2 | 304                                  | A:0.838816           | T:0.161184      |
| chr28          | 10106044 | 2 | 304                                  | T:0.815789           | A:0.184211      |
| chr28          | 10106203 | 2 | 314                                  | ACACCCTGGGC:0.754777 | A:              |

0.245223

|       |          |   |     |                |              |
|-------|----------|---|-----|----------------|--------------|
| chr28 | 10106407 | 2 | 308 | T:0.801948     | C:0.198052   |
| chr28 | 10106817 | 2 | 300 | T:0.803333     | C:0.196667   |
| chr28 | 10107030 | 2 | 298 | T:0.805369     | C:0.194631   |
| chr28 | 10107056 | 2 | 296 | G:0.807432     | GT:0.192568  |
| chr28 | 10107095 | 2 | 302 | A:0.81457      | G:0.18543    |
| chr28 | 10107288 | 2 | 302 | C:0.804636     | A:0.195364   |
| chr28 | 10107430 | 2 | 310 | G:0.803226     | A:0.196774   |
| chr28 | 10107531 | 2 | 310 | T:0.8 A:0.2    |              |
| chr28 | 10107690 | 2 | 312 | G:0.948718     | A:0.0512821  |
| chr28 | 10107722 | 2 | 312 | G:0.820513     | A:0.179487   |
| chr28 | 10108281 | 2 | 284 | A:0.78169      | C:0.21831    |
| chr28 | 10108956 | 2 | 304 | A:0.835526     | T:0.164474   |
| chr28 | 10109651 | 2 | 312 | T:0.820513     | A:0.179487   |
| chr28 | 10109700 | 2 | 314 | C:0.968153     | G:0.0318471  |
| chr28 | 10110817 | 2 | 282 | C:0.70922      | CT:0.29078   |
| chr28 | 10111283 | 2 | 278 | G:0.852518     | T:0.147482   |
| chr28 | 10111747 | 2 | 306 | C:0.826797     | CT:0.173203  |
| chr28 | 10112779 | 2 | 308 | T:0.792208     | A:0.207792   |
| chr28 | 10112970 | 2 | 294 | T:0.778912     | C:0.221088   |
| chr28 | 10113257 | 2 | 300 | A:0.486667     | G:0.513333   |
| chr28 | 10113277 | 2 | 306 | G:0.810458     | A:0.189542   |
| chr28 | 10113438 | 2 | 310 | T:0.806452     | G:0.193548   |
| chr28 | 10113915 | 2 | 300 | A:0.806667     | G:0.193333   |
| chr28 | 10113965 | 2 | 302 | T:0.791391     | A:0.208609   |
| chr28 | 10115385 | 3 | 300 | TAAAA:0.693333 | T:0.07 TAAA: |

0.236667

|       |          |   |     |                          |                |
|-------|----------|---|-----|--------------------------|----------------|
| chr28 | 10115597 | 2 | 282 | G:0.93617                | A:0.0638298    |
| chr28 | 10115897 | 2 | 284 | C:0.954225               | CGTT:0.0457746 |
| chr28 | 10116159 | 2 | 284 | CAG:0.859155             | C:0.140845     |
| chr28 | 10116680 | 2 | 246 | G:0.906504               | GA:0.0934959   |
| chr28 | 10117651 | 2 | 304 | C:0.822368               | T:0.177632     |
| chr28 | 10117766 | 2 | 292 | C:0.818493               | CT:0.181507    |
| chr28 | 10119515 | 2 | 302 | T:0.993377               | C:0.00662252   |
| chr28 | 10119785 | 2 | 308 | G:0.821429               | A:0.178571     |
| chr28 | 10120019 | 2 | 292 | C:0.976027               | T:0.0239726    |
| chr28 | 10120177 | 2 | 300 | A:0.83 G:0.17            |                |
| chr28 | 10120315 | 2 | 302 | G:0.817881               | A:0.182119     |
| chr28 | 10120745 | 2 | 298 | G:0.959732               | A:0.0402685    |
| chr28 | 10121284 | 2 | 312 | T:0.826923               | TTTAC:0.173077 |
| chr28 | 10121586 | 2 | 308 | C:0.811688               | T:0.188312     |
| chr28 | 10122715 | 2 | 256 | C:0.488281               | CT:0.511719    |
| chr28 | 10122759 | 2 | 286 | G:0.77972                | C:0.22028      |
| chr28 | 10122974 | 2 | 316 | ATCATGATCCCAGGG:0.778481 | A:             |

0.221519

|       |          |   |     |              |               |
|-------|----------|---|-----|--------------|---------------|
| chr28 | 10123077 | 2 | 304 | T:0.792763   | C:0.207237    |
| chr28 | 10124051 | 2 | 306 | A:0.810458   | C:0.189542    |
| chr28 | 10124215 | 2 | 306 | C:0.800654   | T:0.199346    |
| chr28 | 10124244 | 2 | 294 | A:0.513605   | AT:0.486395   |
| chr28 | 10124862 | 2 | 302 | ATT:0.513245 | A:0.486755    |
| chr28 | 10124867 | 3 | 302 | T:0.304636   | TAAA:0.486755 |

TA:0.208609

|       |          |   |     |           |                |
|-------|----------|---|-----|-----------|----------------|
| chr28 | 10124999 | 4 | 320 | G:0.46875 | GTCTC:0.115625 |
|-------|----------|---|-----|-----------|----------------|

GTCTCTC:0.253125 GTCTCTCTCTCTC:0.1625

|                                 |            |     |               |              |
|---------------------------------|------------|-----|---------------|--------------|
| chr28                           | 10125084 2 | 300 | A:0.816667    | T:0.183333   |
| chr28                           | 10125493 2 | 296 | C:0.827703    | T:0.172297   |
| chr28                           | 10125613 2 | 294 | G:0.513605    | A:0.486395   |
| chr28                           | 10125652 2 | 266 | A:0.879699    | AT:0.120301  |
| chr28                           | 10125921 2 | 294 | C:0.969388    | G:0.0306122  |
| chr28                           | 10125998 2 | 312 | C:0.983974    | T:0.0160256  |
| chr28                           | 10126072 2 | 308 | AC:0.814935   | A:0.185065   |
| chr28                           | 10126127 2 | 304 | T:0.809211    | A:0.190789   |
| chr28                           | 10126138 2 | 300 | T:0.523333    | C:0.476667   |
| chr28                           | 10126617 2 | 300 | T:0.536667    | C:0.463333   |
| chr28                           | 10126622 2 | 298 | T:0.963087    | C:0.0369128  |
| chr28                           | 10126737 2 | 294 | A:0.326531    | G:0.673469   |
| chr28                           | 10127431 2 | 296 | T:0.847973    | TA:0.152027  |
| chr28                           | 10127853 2 | 302 | G:0.970199    | A:0.0298013  |
| chr28                           | 10127978 2 | 302 | C:0.516556    | T:0.483444   |
| chr28                           | 10128193 3 | 296 | T:0.310811    | TA:0.655405  |
| TAA:0.0337838                   |            |     |               |              |
| chr28                           | 10128339 2 | 298 | A:0.808725    | G:0.191275   |
| chr28                           | 10128587 2 | 300 | A:0.27        | G:0.73       |
| chr28                           | 10128663 2 | 290 | G:0.796552    | A:0.203448   |
| chr28                           | 10128703 2 | 274 | A:0.354015    | G:0.645985   |
| chr28                           | 10128796 2 | 306 | A:0.964052    | G:0.0359477  |
| chr28                           | 10128797 2 | 306 | A:0.787582    | G:0.212418   |
| chr28                           | 10129048 2 | 306 | C:0.539216    | T:0.460784   |
| chr28                           | 10129091 2 | 306 | T:0.330065    | A:0.669935   |
| chr28                           | 10129195 2 | 306 | ATCT:0.977124 | A:0.0228758  |
| chr28                           | 10129258 2 | 306 | AG:0.977124   | A:0.0228758  |
| chr28                           | 10129397 2 | 306 | T:0.519608    | G:0.480392   |
| chr28                           | 10129433 2 | 298 | A:0.305369    | G:0.694631   |
| chr28                           | 10129449 2 | 302 | G:0.791391    | A:0.208609   |
| chr28                           | 10129496 2 | 308 | T:0.00649351  | G:0.993506   |
| chr28                           | 10129566 2 | 300 | T:0.516667    | A:0.483333   |
| chr28                           | 10129780 4 | 316 | A:0.316456    | AGTTGTTGTT:  |
| 0.224684 AGTTGTTGTTGTT:0.246835 |            |     |               |              |
| chr28                           | 10130205 2 | 288 | C:0.982639    | T:0.0173611  |
| chr28                           | 10130209 2 | 284 | T:0.341549    | C:0.658451   |
| chr28                           | 10130249 2 | 254 | C:0.712598    | CCT:0.287402 |
| chr28                           | 10130303 2 | 280 | TA:0.789286   | T:0.210714   |
| chr28                           | 10130475 2 | 292 | G:0.972603    | A:0.0273973  |
| chr28                           | 10130573 2 | 280 | G:0.553571    | A:0.446429   |
| chr28                           | 10130657 2 | 216 | C:0.805556    | CCT:0.194444 |
| chr28                           | 10130720 2 | 268 | TAA:0.5       | T:0.5        |
| chr28                           | 10130743 2 | 290 | C:0.796552    | T:0.203448   |
| chr28                           | 10130774 2 | 302 | A:0.00662252  | G:0.993377   |
| chr28                           | 10130874 2 | 242 | G:0.132231    | C:0.867769   |
| chr28                           | 10131021 2 | 248 | T:0           | TA:1         |
| chr28                           | 10131487 2 | 266 | G:0.973684    | T:0.0263158  |
| chr28                           | 10131492 2 | 276 | T:0.32971     | G:0.67029    |
| chr28                           | 10131505 2 | 276 | T:0.32971     | C:0.67029    |
| chr28                           | 10131651 2 | 258 | G:0.55814     | GC:0.44186   |
| chr28                           | 10131678 2 | 280 | C:0.985714    | T:0.0142857  |
| chr28                           | 10131857 2 | 282 | TG:0.546099   | T:0.453901   |
| chr28                           | 10132020 2 | 298 | G:0.510067    | GT:0.489933  |
| chr28                           | 10132022 3 | 298 | TC:0.791946   | T:0.0167785  |

TCC:0.191275  
 chr28 10132439 2 300 T:0.83 C:0.17  
 chr28 10132652 3 292 CT:0.332192 C:0.202055  
 CTT:0.465753  
 chr28 10132900 2 292 C:0.979452 T:0.0205479  
 chr28 10133410 2 296 T:0.787162 TC:0.212838  
 chr28 10133788 2 284 G:0.841549 GAA:0.158451  
 chr28 10133978 2 198 T:0.919192 A:0.0808081  
 chr28 10134071 2 192 C:0.651042 T:0.348958  
 chr28 10134365 2 198 A:0.646465 G:0.353535  
 chr28 10134481 2 196 G:0.617347 A:0.382653  
 chr28 10134640 2 204 AT:0.647059 A:0.352941  
 chr28 10134643 2 204 AAT:0.647059 A:0.352941  
 chr28 10134645 2 196 TA:0.561224 T:0.438776  
 chr28 10134653 2 204 A:0.647059 T:0.352941  
 chr28 10134828 2 182 C:0.648352 T:0.351648  
 chr28 10136462 2 302 C:0.97351 T:0.0264901  
 chr28 10136854 2 300 T:0.983333 C:0.0166667  
 chr28 10137070 2 318 GAAAAAGAAAACCAAAAAAAAAAAAAAAAAAAAAA:  
 0.361635 G:0.638365  
 chr28 10137137 2 268 G:0.820896 A:0.179104  
 chr28 10137644 2 294 G:0.826531 A:0.173469  
 chr28 10137692 2 290 C:0.486207 T:0.513793  
 chr28 10137697 2 290 T:0.52069 A:0.47931  
 chr28 10137774 2 290 C:0.62069 CCTCT:0.37931  
 chr28 10137795 2 286 C:0.821678 CTG:0.178322  
 chr28 10138143 2 302 A:0.331126 G:0.668874  
 chr28 10138144 2 302 T:0.331126 A:0.668874  
 chr28 10138331 2 290 T:0.837931 C:0.162069  
 chr28 10138822 2 278 C:0.535971 G:0.464029  
 chr28 10138986 2 296 G:0.290541 A:0.709459  
 chr28 10139094 2 296 T:0.817568 A:0.182432  
 chr28 10139240 2 306 T:0.986928 C:0.0130719  
 chr28 10139597 2 296 A:0.800676 C:0.199324  
 chr28 10139797 2 310 G:0.958065 A:0.0419355  
 chr28 10140077 2 316 C:0 G:1  
 chr28 10140097 2 316 AG:0 A:1  
 chr28 10140385 3 296 TA:0.287162 T:0.523649  
 TAA:0.189189  
 chr28 10140474 2 288 G:0.96875 A:0.03125  
 chr28 10140533 2 274 ATC:0.321168 A:0.678832  
 chr28 10140599 2 310 T:0.132258 A:0.867742  
 chr28 10140961 2 304 C:0.490132 T:0.509868  
 chr28 10141158 2 300 G:0.986667 T:0.0133333  
 chr28 10141522 2 312 G:0.977564 A:0.0224359  
 chr28 10141979 2 298 G:0.298658 A:0.701342  
 chr28 10142270 2 302 G:0.966887 A:0.0331126  
 chr28 10142335 2 298 T:0.97651 C:0.0234899  
 chr28 10142667 2 296 G:0.908784 A:0.0912162  
 chr28 10142776 2 284 CCT:0.785211 C:0.214789  
 chr28 10142881 2 304 T:0.970395 G:0.0296053  
 chr28 10143149 2 306 T:0.529412 A:0.470588  
 chr28 10143281 2 290 G:0.968966 A:0.0310345  
 chr28 10143371 2 294 C:0.97619 T:0.0238095

|                                                     |          |   |     |                 |              |
|-----------------------------------------------------|----------|---|-----|-----------------|--------------|
| chr28                                               | 10143432 | 2 | 310 | A:0.964516      | T:0.0354839  |
| chr28                                               | 10143856 | 2 | 306 | A:0.761438      | G:0.238562   |
| chr28                                               | 10144051 | 2 | 306 | G:0.977124      | A:0.0228758  |
| chr28                                               | 10144301 | 2 | 306 | T:0.513072      | C:0.486928   |
| chr28                                               | 10144486 | 2 | 288 | A:0.975694      | G:0.0243056  |
| chr28                                               | 10144544 | 2 | 270 | CCT:0.511111    | C:0.488889   |
| chr28                                               | 10144548 | 2 | 320 | T:0.81875       |              |
| TCTCTCTCTCTCTCTCTGCTTCTCCCTCTGCCTGTGTCTCTGC:0.18125 |          |   |     |                 |              |
| chr28                                               | 10144605 | 2 | 300 | TA:0.95         | T:0.05       |
| chr28                                               | 10144851 | 2 | 308 | G:0.977273      | A:0.0227273  |
| chr28                                               | 10145459 | 2 | 304 | C:0.253289      | CTA:0.746711 |
| chr28                                               | 10145579 | 2 | 306 | T:0.754902      | G:0.245098   |
| chr28                                               | 10145854 | 2 | 304 | T:0.220395      | C:0.779605   |
| chr28                                               | 10145985 | 2 | 304 | G:0.980263      | T:0.0197368  |
| chr28                                               | 10145992 | 2 | 304 | T:0.980263      | C:0.0197368  |
| chr28                                               | 10146039 | 2 | 306 | GGTGT:0.80719   | G:0.19281    |
| chr28                                               | 10146058 | 2 | 314 | G:0.576433      | GTA:0.423567 |
| chr28                                               | 10146103 | 2 | 306 | T:0.784314      | C:0.215686   |
| chr28                                               | 10146246 | 2 | 310 | A:0.641935      | G:0.358065   |
| chr28                                               | 10146279 | 2 | 312 | T:0.660256      | C:0.339744   |
| chr28                                               | 10147010 | 2 | 312 | G:0.666667      | C:0.333333   |
| chr28                                               | 10147135 | 2 | 298 | G:0.288591      | C:0.711409   |
| chr28                                               | 10147191 | 2 | 304 | T:0.667763      | G:0.332237   |
| chr28                                               | 10147472 | 2 | 302 | A:0.695364      | G:0.304636   |
| chr28                                               | 10147807 | 2 | 304 | T:0.269737      | TC:0.730263  |
| chr28                                               | 10148232 | 2 | 298 | GA:0.751678     | G:0.248322   |
| chr28                                               | 10148242 | 2 | 298 | AGAG:0.751678   | A:0.248322   |
| chr28                                               | 10148245 | 3 | 316 | GAAGA:0.841772  | G:0.0917722  |
| GAAGAAAGA:0.0664557                                 |          |   |     |                 |              |
| chr28                                               | 10148288 | 2 | 310 | GAA:0.919355    | G:0.0806452  |
| chr28                                               | 10148294 | 2 | 242 | AAG:0.677686    | A:0.322314   |
| chr28                                               | 10148300 | 2 | 256 | GAA:0.601562    | G:0.398438   |
| chr28                                               | 10148412 | 2 | 312 | C:0.939103      | T:0.0608974  |
| chr28                                               | 10149146 | 2 | 304 | T:0.299342      | G:0.700658   |
| chr28                                               | 10149410 | 2 | 300 | A:0.653333      | G:0.346667   |
| chr28                                               | 10149449 | 2 | 302 | G:0.870861      | T:0.129139   |
| chr28                                               | 10149841 | 2 | 300 | C:0.363333      | CT:0.636667  |
| chr28                                               | 10149893 | 2 | 288 | A:0.597222      | T:0.402778   |
| chr28                                               | 10149980 | 2 | 300 | C:0.653333      | T:0.346667   |
| chr28                                               | 10149999 | 2 | 296 | G:0.97973       | C:0.0202703  |
| chr28                                               | 10150042 | 2 | 278 | T:0.97482       | C:0.0251799  |
| chr28                                               | 10150292 | 2 | 308 | A:0.649351      | T:0.350649   |
| chr28                                               | 10150297 | 2 | 310 | G:0.980645      | T:0.0193548  |
| chr28                                               | 10150322 | 2 | 310 | C:0.980645      | T:0.0193548  |
| chr28                                               | 10150341 | 2 | 288 | AT:0.635417     | A:0.364583   |
| chr28                                               | 10150377 | 4 | 312 | CAG:0.477564    | C:0.330128   |
| CAGAGAGAG:0.150641                                  |          |   |     |                 |              |
| CAGAGAGAGAG:0.0416667                               |          |   |     |                 |              |
| chr28                                               | 10150480 | 2 | 310 | A:0.980645      | ACATCCTGAG:  |
| 0.0193548                                           |          |   |     |                 |              |
| chr28                                               | 10150723 | 2 | 314 | CCTTAT:0.649682 | C:0.350318   |
| chr28                                               | 10150822 | 2 | 314 | C:0.977707      | A:0.022293   |
| chr28                                               | 10150902 | 2 | 312 | A:0.259615      | T:0.740385   |
| chr28                                               | 10150992 | 2 | 312 | C:0.282051      | A:0.717949   |
| chr28                                               | 10151037 | 2 | 298 | G:0.275168      | T:0.724832   |



|       |                                                                   |     |                              |                |
|-------|-------------------------------------------------------------------|-----|------------------------------|----------------|
| chr28 | 10151226 2                                                        | 304 | G:0.667763                   | A:0.332237     |
| chr28 | 10151411 2                                                        | 288 | T:0.642361                   | C:0.357639     |
| chr28 | 10151543 2                                                        | 306 | AT:0.372549                  | A:0.627451     |
| chr28 | 10152372 2                                                        | 302 | C:0.311258                   | T:0.688742     |
| chr28 | 10152413 4                                                        | 300 | TAA:0.39 T:0.263333          | TA:            |
|       | 0.186667 TAAA:0.16                                                |     |                              |                |
| chr28 | 10152907 2                                                        | 298 | GA:0.634228                  | G:0.365772     |
| chr28 | 10153343 2                                                        | 294 | G:0.639456                   | A:0.360544     |
| chr28 | 10153365 2                                                        | 302 | C:0.874172                   | T:0.125828     |
| chr28 | 10153418 2                                                        | 304 | C:0.641447                   | A:0.358553     |
| chr28 | 10153642 2                                                        | 280 | C:0.953571                   | T:0.0464286    |
| chr28 | 10153904 2                                                        | 302 | G:0.288079                   | A:0.711921     |
| chr28 | 10153945 2                                                        | 298 | GTC:0.728188                 | G:0.271812     |
| chr28 | 10153996 2                                                        | 302 | T:0.668874                   | C:0.331126     |
| chr28 | 10154047 2                                                        | 288 | A:0.40625                    | G:0.59375      |
| chr28 | 10154104 2                                                        | 266 | A:0.928571                   | T:0.0714286    |
| chr28 | 10154196 2                                                        | 210 | C:0.528571                   | CCT:0.471429   |
| chr28 | 10154306 2                                                        | 294 | C:0.632653                   | A:0.367347     |
| chr28 | 10154338 2                                                        | 316 | C:0.651899                   |                |
|       | CCAAAAAAAAAAACAAAAAAAAACAAAAAAAAATAATTAAAAAAAAAAAAAAAAAAAAAAAAAA: |     |                              |                |
|       | 0.348101                                                          |     |                              |                |
| chr28 | 10154339 2                                                        | 316 | G:0.651899                   | GAACCTGCCTTCC: |
|       | 0.348101                                                          |     |                              |                |
| chr28 | 10154461 3                                                        | 264 | T:0.318182                   | TA:0.371212    |
|       | TAA:0.310606                                                      |     |                              |                |
| chr28 | 10154689 2                                                        | 314 | C:0.66879                    | G:0.33121      |
| chr28 | 10154839 2                                                        | 222 | CCTCT:0.387387               | C:0.612613     |
| chr28 | 10154898 3                                                        | 278 | CA:0.392086                  | C:0.341727     |
|       | CAAA:0.266187                                                     |     |                              |                |
| chr28 | 10155088 2                                                        | 256 | TAAAAGTTTTTAAAAA:0.667969 T: |                |
|       | 0.332031                                                          |     |                              |                |
| chr28 | 10155093 2                                                        | 266 | GTTTTTAAAAAAAAGT:0.74812 G:  |                |
|       | 0.25188                                                           |     |                              |                |
| chr28 | 10155179 2                                                        | 282 | G:0.712766                   | GA:0.287234    |
| chr28 | 10155187 2                                                        | 282 | T:0.606383                   | A:0.393617     |
| chr28 | 10155196 2                                                        | 282 | T:0.70922                    | A:0.29078      |
| chr28 | 10155249 2                                                        | 234 | T:0.67094                    | C:0.32906      |
| chr28 | 10155371 2                                                        | 276 | G:0.40942                    | C:0.59058      |
| chr28 | 10155420 2                                                        | 286 | A:0.402098                   | T:0.597902     |
| chr28 | 10155466 2                                                        | 240 | ATC:0.741667                 | A:0.258333     |
| chr28 | 10155468 2                                                        | 244 | CTCT:0.651639                | C:0.348361     |
| chr28 | 10155470 2                                                        | 240 | C:0.625 T:0.375              |                |
| chr28 | 10155496 2                                                        | 244 | T:0.651639                   | TGATA:0.348361 |
| chr28 | 10155500 2                                                        | 244 | ACT:0.651639                 | A:0.348361     |
| chr28 | 10155509 2                                                        | 244 | GAC:0.651639                 | G:0.348361     |
| chr28 | 10155611 2                                                        | 308 | GC:0 G:1                     |                |
| chr28 | 10155632 2                                                        | 270 | T:0.277778                   | C:0.722222     |
| chr28 | 10155666 2                                                        | 282 | T:0.698582                   | TA:0.301418    |
| chr28 | 10155667 3                                                        | 292 | T:0.0273973                  | A:0.325342     |
|       | TA:0.64726                                                        |     |                              |                |
| chr28 | 10155678 2                                                        | 284 | T:0 TA:1                     |                |
| chr28 | 10155975 2                                                        | 306 | C:0.666667                   | CTAA:0.333333  |
| chr28 | 10156113 2                                                        | 298 | C:0.278523                   | A:0.721477     |
| chr28 | 10156169 2                                                        | 304 | AAATT:0.990132               | A:0.00986842   |

chr28 10156261 2 310 T:0.635484 C:0.364516  
chr28 10156606 2 294 G:0.721088 A:0.278912  
chr28 10156658 2 226 C:0.433628 CT:0.566372  
chr28 10156835 2 228 G:0.5 A:0.5  
chr28 10156897 2 258 T:0.344961 C:0.655039  
chr28 10157052 2 256 T:0.832031 TA:0.167969  
chr28 10157058 4 256 T:0.636719 TTTTA:0.0390625  
TTA:0.167969 TTTTATTTATTTA:0.15625  
chr28 10157251 2 264 C:0.609848  
CTATATGAGTAAACTTTACAATATTTCTGAAAGATCCAAAAATAGACTGGATCCATCGATAA:  
0.390152  
chr28 10157831 3 150 TA:0.3 T:0.646667 TAA:  
0.0533333  
chr28 10158165 2 294 GTGTC:0.819728 G:0.180272  
chr28 10158167 3 306 GTCTCTCTC:0.676471 G:  
0.222222 GTCTCTC:0.101307  
chr28 10158232 3 294 TAAAAAA:0.384354 TA:0.292517  
T:0.323129  
chr28 10158238 2 272 A:0.650735 ATT:0.349265  
chr28 10158290 2 288 A:0.642361 AG:0.357639  
chr28 10158392 2 300 T:0.67 C:0.33  
chr28 10158447 2 284 CT:0.65493 C:0.34507  
chr28 10158486 2 294 T:0.727891 TAC:0.272109  
chr28 10158490 3 316 C:0.737342 CAGAGAGAGAGAG:  
0.189873 CAGAGAGAGAGAG:0.0727848  
chr28 10158492 2 298 G:0.959732 C:0.0402685  
chr28 10158537 2 298 G:0.620805 T:0.379195  
chr28 10158667 2 294 A:0.656463 G:0.343537  
chr28 10159009 2 298 G:0.654362 A:0.345638  
chr28 10159257 2 302 G:0.986755 GA:0.013245  
chr28 10159626 2 312 A:0.733974 T:0.266026  
chr28 10159654 2 304 T:0.371711 A:0.628289  
chr28 10159695 2 300 T:0.666667 C:0.333333  
chr28 10159868 2 130 C:0.738462 CT:0.261538  
chr28 10159995 2 128 C:0.90625 T:0.09375  
chr28 10160300 2 290 C:0.62069 T:0.37931  
chr28 10160324 2 300 C:0.833333 T:0.166667  
chr28 10160325 2 300 G:0.32 T:0.68  
chr28 10160674 2 304 C:0.259868 A:0.740132  
chr28 10161160 2 310 A:0.967742 G:0.0322581  
chr28 10161412 2 312 TAATTTATA:0.397436 T:  
0.602564  
chr28 10161423 2 312 GA:0.971154 G:0.0288462  
chr28 10161772 2 294 TTC:0.642857 T:0.357143  
chr28 10161810 2 314 CTGTGTGTGTGTG:0.630573 C:  
0.369427  
chr28 10161852 2 294 T:0.945578 A:0.0544218  
chr28 10161975 2 306 C:0.369281 A:0.630719  
chr28 10162099 2 272 TCA:0.683824 T:0.316176  
chr28 10162212 2 310 CACTT:0.658065 C:0.341935  
chr28 10162302 4 300 C:0.323333 CT:0.343333  
CTT:0.253333 CTTT:0.08  
chr28 10162453 2 284 C:0.690141 T:0.309859  
chr28 10162530 2 296 A:0.695946 G:0.304054

|                                                    |          |   |     |                  |                  |
|----------------------------------------------------|----------|---|-----|------------------|------------------|
| chr28                                              | 10162553 | 2 | 308 | C:0.977273       | A:0.0227273      |
| chr28                                              | 10162727 | 2 | 290 | G:0.982759       | A:0.0172414      |
| chr28                                              | 10162764 | 2 | 296 | A:0.337838       | G:0.662162       |
| chr28                                              | 10162876 | 3 | 292 | T:0.671233       | TAAA:0.140411    |
| TAAAA:0.188356                                     |          |   |     |                  |                  |
| chr28                                              | 10162901 | 2 | 290 | T:0.641379       | A:0.358621       |
| chr28                                              | 10163470 | 2 | 166 | G:0.837349       | T:0.162651       |
| chr28                                              | 10164070 | 2 | 294 | GTCTC:0.942177   | G:0.0578231      |
| chr28                                              | 10164099 | 2 | 290 | TCTG:0.931034    | T:0.0689655      |
| chr28                                              | 10164101 | 4 | 316 | T:0.594937       | TC:0.110759      |
| TCTCTC:0.0411392 TCTCTCTCTCTC:0.253165             |          |   |     |                  |                  |
| chr28                                              | 10164102 | 2 | 306 | G:0.571895       | T:0.428105       |
| chr28                                              | 10164474 | 2 | 306 | G:0.588235       | A:0.411765       |
| chr28                                              | 10164559 | 2 | 310 | A:0.987097       | AGCGCC:0.0129032 |
| chr28                                              | 10164587 | 2 | 304 | C:0.697368       | T:0.302632       |
| chr28                                              | 10164611 | 2 | 300 | C:0.876667       | T:0.123333       |
| chr28                                              | 10164666 | 2 | 298 | C:0.57047        | G:0.42953        |
| chr28                                              | 10164669 | 2 | 296 | TCTTC:0.706081   | T:0.293919       |
| chr28                                              | 10164671 | 3 | 312 | TTCGTC:0.400641  | T:0.410256       |
| TGTTTC:0.189103                                    |          |   |     |                  |                  |
| chr28                                              | 10164675 | 2 | 294 | T:0.482993       | TC:0.517007      |
| chr28                                              | 10164677 | 2 | 294 | C:0.482993       | CT:0.517007      |
| chr28                                              | 10164702 | 2 | 290 | A:0.0206897      | AG:0.97931       |
| chr28                                              | 10164787 | 2 | 300 | C:0.713333       | G:0.286667       |
| chr28                                              | 10164880 | 2 | 314 | G:0.579618       | A:0.420382       |
| chr28                                              | 10165039 | 2 | 300 | TCATG:0.596667   | T:0.403333       |
| chr28                                              | 10165148 | 3 | 314 | T:0.375796       |                  |
| TTCTCTCTCTCTCTC:0.292994 TTCTCTCTCTCTCTCTC:0.33121 |          |   |     |                  |                  |
| chr28                                              | 10165184 | 4 | 282 | TAAA:0.368794    | T:0.347518       |
| TA:0.187943 TAA:0.0957447                          |          |   |     |                  |                  |
| chr28                                              | 10165347 | 2 | 218 | C:0.311927       | CA:0.688073      |
| chr28                                              | 10165388 | 2 | 284 | C:0.707746       | T:0.292254       |
| chr28                                              | 10165697 | 2 | 300 | G:0.703333       | A:0.296667       |
| chr28                                              | 10165799 | 2 | 304 | C:0.427632       | A:0.572368       |
| chr28                                              | 10165856 | 2 | 312 | A:0.730769       | G:0.269231       |
| chr28                                              | 10166000 | 2 | 302 | C:0.721854       | T:0.278146       |
| chr28                                              | 10166114 | 2 | 288 | T:0.746528       | TG:0.253472      |
| chr28                                              | 10166115 | 3 | 286 | GTTT:0.867133    | G:0.0314685      |
| GTT:0.101399                                       |          |   |     |                  |                  |
| chr28                                              | 10166116 | 2 | 298 | T:0.714765       | TGG:0.285235     |
| chr28                                              | 10166119 | 2 | 284 | T:0.975352       | G:0.0246479      |
| chr28                                              | 10166202 | 2 | 314 | G:0.72293        | A:0.27707        |
| chr28                                              | 10166217 | 2 | 314 | T:0.72293        | C:0.27707        |
| chr28                                              | 10166314 | 3 | 304 | TGA:0.766447     | T:0.111842       |
| TGAGAGA:0.121711                                   |          |   |     |                  |                  |
| chr28                                              | 10166335 | 2 | 298 | GA:0.744966      | G:0.255034       |
| chr28                                              | 10166338 | 2 | 298 | AGAGGC:0.744966  | A:0.255034       |
| chr28                                              | 10166523 | 2 | 302 | G:0.986755       | GC:0.013245      |
| chr28                                              | 10166524 | 2 | 300 | T:0.29 C:0.71    |                  |
| chr28                                              | 10166526 | 2 | 302 | T:0.986755       | C:0.013245       |
| chr28                                              | 10166527 | 2 | 300 | CCA:0.29 C:0.71  |                  |
| chr28                                              | 10166529 | 2 | 302 | A:0.986755       | G:0.013245       |
| chr28                                              | 10166595 | 2 | 302 | GAGAGAC:0.758278 | G:0.241722       |
| chr28                                              | 10166651 | 2 | 292 | A:0.702055       | G:0.297945       |

|                                                                 |          |   |     |                 |                 |
|-----------------------------------------------------------------|----------|---|-----|-----------------|-----------------|
| chr28                                                           | 10166815 | 2 | 278 | C:0.471223      | A:0.528777      |
| chr28                                                           | 10167035 | 2 | 216 | T:0.615741      | TA:0.384259     |
| chr28                                                           | 10167173 | 2 | 300 | AT:0.666667     | A:0.333333      |
| chr28                                                           | 10167306 | 2 | 256 | T:0.972656      | C:0.0273438     |
| chr28                                                           | 10167353 | 2 | 254 | C:0.614173      | T:0.385827      |
| chr28                                                           | 10167432 | 2 | 256 | C:0.625 T:0.375 |                 |
| chr28                                                           | 10167461 | 2 | 260 | TA:0.615385     | T:0.384615      |
| chr28                                                           | 10167532 | 2 | 298 | G:0.758389      | A:0.241611      |
| chr28                                                           | 10167797 | 2 | 298 | C:0.728188      | T:0.271812      |
| chr28                                                           | 10167871 | 2 | 308 | G:0.324675      | A:0.675325      |
| chr28                                                           | 10167923 | 2 | 310 | A:0.709677      | C:0.290323      |
| chr28                                                           | 10167993 | 2 | 300 | A:0.706667      | G:0.293333      |
| chr28                                                           | 10168029 | 2 | 284 | G:0.292254      | GT:0.707746     |
| chr28                                                           | 10168285 | 2 | 302 | T:0.291391      | C:0.708609      |
| chr28                                                           | 10168409 | 2 | 288 | TTG:0.913194    | T:0.0868056     |
| chr28                                                           | 10168410 | 2 | 274 | TG:0.587591     | T:0.412409      |
| chr28                                                           | 10168483 | 2 | 306 | A:0.300654      | G:0.699346      |
| chr28                                                           | 10168500 | 2 | 306 | TA:0.300654     | T:0.699346      |
| chr28                                                           | 10168720 | 2 | 306 | A:0.300654      | G:0.699346      |
| chr28                                                           | 10169095 | 2 | 292 | A:0.69863       | ATT:0.30137     |
| chr28                                                           | 10169138 | 2 | 306 | C:0.934641      | A:0.0653595     |
| chr28                                                           | 10169343 | 2 | 166 | AT:0.855422     | A:0.144578      |
| chr28                                                           | 10169635 | 2 | 306 | T:0.990196      | A:0.00980392    |
| chr28                                                           | 10169645 | 2 | 304 | T:0.427632      | C:0.572368      |
| chr28                                                           | 10169770 | 2 | 314 | A:0.691083      | G:0.308917      |
| chr28                                                           | 10169804 | 3 | 304 | CTT:0.394737    | C:0.299342      |
| CT:0.305921                                                     |          |   |     |                 |                 |
| chr28                                                           | 10170040 | 2 | 290 | T:0.993103      | C:0.00689655    |
| chr28                                                           | 10170089 | 2 | 316 | G:0.981013      | GT:0.0189873    |
| chr28                                                           | 10170108 | 2 | 298 | C:0.687919      | T:0.312081      |
| chr28                                                           | 10170182 | 5 | 314 | T:0.735669      | TTTTA:0.0350318 |
| TTATTTA:0.089172 TTATTTATTTA:0.0191083 TTATTTATTTATTTA:0.121019 |          |   |     |                 |                 |
| chr28                                                           | 10170238 | 2 | 298 | A:0.724832      | G:0.275168      |
| chr28                                                           | 10170244 | 2 | 298 | G:0.724832      | T:0.275168      |
| chr28                                                           | 10170287 | 2 | 306 | G:0.954248      | A:0.0457516     |
| chr28                                                           | 10170290 | 2 | 296 | G:0.722973      | A:0.277027      |
| chr28                                                           | 10170527 | 2 | 308 | T:0.720779      | C:0.279221      |
| chr28                                                           | 10170663 | 2 | 300 | C:0.613333      | T:0.386667      |
| chr28                                                           | 10170835 | 2 | 304 | T:0.289474      | A:0.710526      |
| chr28                                                           | 10170916 | 2 | 312 | TA:0.605769     | T:0.394231      |
| chr28                                                           | 10171137 | 2 | 306 | G:0.297386      | A:0.702614      |
| chr28                                                           | 10171237 | 2 | 304 | C:0.713816      | T:0.286184      |
| chr28                                                           | 10171367 | 2 | 306 | G:0.565359      | GA:0.434641     |
| chr28                                                           | 10171752 | 2 | 288 | T:0.236111      | C:0.763889      |
| chr28                                                           | 10171820 | 2 | 258 | T:0.22093       | TAAA:0.77907    |
| chr28                                                           | 10171859 | 2 | 296 | G:0.719595      | A:0.280405      |
| chr28                                                           | 10171865 | 2 | 296 | G:0.719595      | A:0.280405      |
| chr28                                                           | 10171943 | 2 | 302 | G:0.731788      | C:0.268212      |
| chr28                                                           | 10172177 | 2 | 308 | C:0.704545      | A:0.295455      |
| chr28                                                           | 10172284 | 2 | 304 | CT:0.973684     | C:0.0263158     |
| chr28                                                           | 10172425 | 2 | 304 | A:0.713816      | C:0.286184      |
| chr28                                                           | 10172799 | 2 | 302 | C:0.711921      | T:0.288079      |
| chr28                                                           | 10173033 | 2 | 310 | A:0.729032      | G:0.270968      |
| chr28                                                           | 10173460 | 2 | 294 | G:0.721088      | C:0.278912      |

|                                  |          |   |     |                     |                |
|----------------------------------|----------|---|-----|---------------------|----------------|
| chr28                            | 10174465 | 2 | 296 | C:0.283784          | T:0.716216     |
| chr28                            | 10174656 | 2 | 304 | C:0.707237          | T:0.292763     |
| chr28                            | 10175018 | 2 | 268 | TA:0.731343         | T:0.268657     |
| chr28                            | 10175020 | 2 | 272 | A:0.933824          | T:0.0661765    |
| chr28                            | 10175416 | 2 | 296 | G:0 C:1             |                |
| chr28                            | 10175462 | 2 | 288 | C:0.739583          | T:0.260417     |
| chr28                            | 10175676 | 2 | 302 | GCAA:0.721854       | G:0.278146     |
| chr28                            | 10175995 | 2 | 298 | A:0.711409          | G:0.288591     |
| chr28                            | 10176036 | 2 | 296 | G:0.706081          | A:0.293919     |
| chr28                            | 10176088 | 2 | 288 | A:0.732639          | T:0.267361     |
| chr28                            | 10176155 | 2 | 314 | T:0.726115          |                |
| TAAATATTTTTGTTGAAAAAAAAAAGAAAAA: |          |   |     | 0.273885            |                |
| chr28                            | 10176451 | 2 | 300 | C:0.7 T:0.3         |                |
| chr28                            | 10176452 | 2 | 300 | G:0.926667          | A:0.0733333    |
| chr28                            | 10176636 | 2 | 298 | G:0.718121          | A:0.281879     |
| chr28                            | 10177037 | 2 | 302 | C:0 CA:1            |                |
| chr28                            | 10177053 | 2 | 302 | C:0 CA:1            |                |
| chr28                            | 10177172 | 2 | 290 | G:0.696552          | A:0.303448     |
| chr28                            | 10177588 | 2 | 314 | T:0.719745          | A:0.280255     |
| chr28                            | 10177752 | 2 | 296 | C:0.709459          | A:0.290541     |
| chr28                            | 10177792 | 2 | 288 | T:0.732639          | C:0.267361     |
| chr28                            | 10177951 | 2 | 310 | G:0.732258          | A:0.267742     |
| chr28                            | 10177995 | 2 | 298 | C:0.751678          | T:0.248322     |
| chr28                            | 10178073 | 2 | 286 | G:0.573427          | A:0.426573     |
| chr28                            | 10178127 | 2 | 300 | T:0.75 C:0.25       |                |
| chr28                            | 10178215 | 2 | 298 | T:0.781879          | TA:0.218121    |
| chr28                            | 10178216 | 3 | 300 | T:0.78 TA:0.0566667 | TATA:          |
| 0.163333                         |          |   |     |                     |                |
| chr28                            | 10178259 | 2 | 298 | G:0.748322          | A:0.251678     |
| chr28                            | 10178587 | 2 | 314 | CTGGGAGATGCTT:      | 0.726115 C:    |
| 0.273885                         |          |   |     |                     |                |
| chr28                            | 10178669 | 2 | 292 | G:0.746575          | A:0.253425     |
| chr28                            | 10178780 | 2 | 304 | CA:0.736842         | C:0.263158     |
| chr28                            | 10178917 | 2 | 292 | C:0.722603          | T:0.277397     |
| chr28                            | 10178994 | 2 | 308 | T:0.746753          | G:0.253247     |
| chr28                            | 10179163 | 2 | 298 | C:0.959732          | T:0.0402685    |
| chr28                            | 10179338 | 2 | 312 | T:0.798077          | C:0.201923     |
| chr28                            | 10179482 | 2 | 312 | A:0.865385          | T:0.134615     |
| chr28                            | 10179722 | 2 | 270 | G:0.52963           | GTT:0.47037    |
| chr28                            | 10179732 | 2 | 316 | T:0.873418          | TG:0.126582    |
| chr28                            | 10179736 | 2 | 316 | T:0.870253          | TGTTTTTTTG:    |
| 0.129747                         |          |   |     |                     |                |
| chr28                            | 10179777 | 2 | 288 | G:0.861111          | A:0.138889     |
| chr28                            | 10179926 | 2 | 292 | A:0.873288          | T:0.126712     |
| chr28                            | 10180117 | 2 | 308 | C:0.876623          | T:0.123377     |
| chr28                            | 10180121 | 2 | 308 | T:0.876623          | C:0.123377     |
| chr28                            | 10180448 | 2 | 312 | A:0.871795          | AGAGAGAGAGAGC: |
| 0.128205                         |          |   |     |                     |                |
| chr28                            | 10180452 | 2 | 294 | C:0.55102           | T:0.44898      |
| chr28                            | 10180559 | 2 | 294 | A:0.418367          | G:0.581633     |
| chr28                            | 10180810 | 2 | 272 | T:0.871324          | C:0.128676     |
| chr28                            | 10180918 | 2 | 288 | TA:0.916667         | T:0.0833333    |
| chr28                            | 10180948 | 2 | 300 | T:0.853333          | A:0.146667     |
| chr28                            | 10181070 | 2 | 306 | A:0.856209          | AT:0.143791    |

|                                                                 |          |   |     |                    |                   |
|-----------------------------------------------------------------|----------|---|-----|--------------------|-------------------|
| chr28                                                           | 10181208 | 2 | 314 | G:0.585987         | A:0.414013        |
| chr28                                                           | 10181272 | 2 | 316 | A:0.96519          | C:0.0348101       |
| chr28                                                           | 10181355 | 2 | 306 | C:0.895425         | T:0.104575        |
| chr28                                                           | 10181433 | 2 | 312 | T:0.961538         | C:0.0384615       |
| chr28                                                           | 10181455 | 2 | 314 | A:0.980892         | ATGCTGC:0.0191083 |
| chr28                                                           | 10181479 | 2 | 308 | CTTCTGTTT:0.899351 | C:                |
| 0.100649                                                        |          |   |     |                    |                   |
| chr28                                                           | 10181484 | 2 | 316 | G:0.756329         | GT:0.243671       |
| chr28                                                           | 10181492 | 2 | 298 | TTG:0.946309       | T:0.0536913       |
| chr28                                                           | 10181494 | 2 | 306 | G:0.663399         | T:0.336601        |
| chr28                                                           | 10181512 | 4 | 302 | GTTT:0.470199      | G:0.102649        |
| GTTTT:0.0562914 TTTT:0.370861                                   |          |   |     |                    |                   |
| chr28                                                           | 10182245 | 2 | 304 | T:0.828947         | C:0.171053        |
| chr28                                                           | 10182413 | 2 | 300 | G:0.8 T:0.2        |                   |
| chr28                                                           | 10182486 | 2 | 302 | T:0.807947         | C:0.192053        |
| chr28                                                           | 10182646 | 2 | 306 | G:0.80719          | A:0.19281         |
| chr28                                                           | 10182848 | 4 | 294 | CT:0.102041        | C:0.197279        |
| CTT:0.346939 CTTT:0.353741                                      |          |   |     |                    |                   |
| chr28                                                           | 10183221 | 2 | 310 | G:0.793548         | A:0.206452        |
| chr28                                                           | 10183345 | 2 | 306 | TAGTC:0.800654     | T:0.199346        |
| chr28                                                           | 10183420 | 2 | 300 | T:0.793333         | C:0.206667        |
| chr28                                                           | 10183703 | 2 | 320 | G:0.90625          | GTTTTTTTTTTT:     |
| 0.09375                                                         |          |   |     |                    |                   |
| chr28                                                           | 10184034 | 2 | 260 | T:0.784615         | TAA:0.215385      |
| chr28                                                           | 10184066 | 2 | 278 | C:0.81295          | CT:0.18705        |
| chr28                                                           | 10184150 | 2 | 306 | A:0.660131         | T:0.339869        |
| chr28                                                           | 10184152 | 2 | 308 | ATTTATTT:0.652597  | A:                |
| 0.347403                                                        |          |   |     |                    |                   |
| chr28                                                           | 10184489 | 2 | 304 | A:0.421053         | G:0.578947        |
| chr28                                                           | 10184650 | 2 | 320 |                    |                   |
| CCAAACTTTCTTTTTCTTTTTTTTTTTTTTTTTTTTTTTTTTTTTTTTTTTT:0.028125C: |          |   |     |                    |                   |
| 0.971875                                                        |          |   |     |                    |                   |
| chr28                                                           | 10184933 | 2 | 304 | T:0.930921         | C:0.0690789       |
| chr28                                                           | 10185046 | 2 | 308 | TA:0.779221        | T:0.220779        |
| chr28                                                           | 10185574 | 2 | 294 | C:0.959184         | T:0.0408163       |
| chr28                                                           | 10185602 | 2 | 304 | T:0.930921         | A:0.0690789       |
| chr28                                                           | 10185825 | 2 | 300 | G:0.993333         | A:0.00666667      |
| chr28                                                           | 10186039 | 2 | 304 | A:0.766447         | AT:0.233553       |
| chr28                                                           | 10186510 | 2 | 312 | G:0.333333         | A:0.666667        |
| chr28                                                           | 10187094 | 2 | 310 | TA:0.435484        | T:0.564516        |
| chr28                                                           | 10187445 | 2 | 308 | AAAC:0.772727      | A:0.227273        |
| chr28                                                           | 10187515 | 2 | 306 | G:0.565359         | A:0.434641        |
| chr28                                                           | 10187527 | 2 | 306 | G:0.444444         | A:0.555556        |
| chr28                                                           | 10187572 | 2 | 296 | C:0.763514         | A:0.236486        |
| chr28                                                           | 10187573 | 2 | 296 | G:0.432432         | A:0.567568        |
| chr28                                                           | 10187947 | 2 | 310 | G:0.606452         |                   |
| GAAACATGTCCACACAAAATGTGTTTAC:0.393548                           |          |   |     |                    |                   |
| chr28                                                           | 10188244 | 2 | 302 | TC:0.890728        | T:0.109272        |
| chr28                                                           | 10188277 | 2 | 288 | C:0.6875 G:0.3125  |                   |
| chr28                                                           | 10188361 | 2 | 298 | T:0.949664         | TA:0.0503356      |
| chr28                                                           | 10188362 | 2 | 302 | T:0.331126         | A:0.668874        |
| chr28                                                           | 10188490 | 2 | 306 | C:0.627451         | T:0.372549        |
| chr28                                                           | 10189517 | 2 | 280 | TC:0.739286        | T:0.260714        |
| chr28                                                           | 10189654 | 2 | 272 | G:0.654412         | C:0.345588        |

|                    |            |     |                   |                  |
|--------------------|------------|-----|-------------------|------------------|
| chr28              | 10189689 2 | 284 | C:0.623239        | T:0.376761       |
| chr28              | 10189692 2 | 282 | T:0.666667        | C:0.333333       |
| chr28              | 10189913 2 | 294 | A:0.663265        | G:0.336735       |
| chr28              | 10190601 2 | 308 | G:0.974026        | A:0.025974       |
| chr28              | 10190834 2 | 302 | T:0.321192        | A:0.678808       |
| chr28              | 10191435 2 | 310 | C:0.341935        | G:0.658065       |
| chr28              | 10191496 2 | 298 | A:0.338926        | G:0.661074       |
| chr28              | 10191911 2 | 242 | TA:0.669421       | T:0.330579       |
| chr28              | 10191933 2 | 242 | G:0.669421        | A:0.330579       |
| chr28              | 10192231 2 | 286 | C:0.961538        | T:0.0384615      |
| chr28              | 10192255 2 | 286 | C:0.667832        | T:0.332168       |
| chr28              | 10192561 2 | 274 | A:0.854015        | T:0.145985       |
| chr28              | 10192640 2 | 270 | T:0.544444        | A:0.455556       |
| chr28              | 10192664 2 | 258 | C:0.244186        | G:0.755814       |
| chr28              | 10192898 2 | 154 | G:0.623377        | C:0.376623       |
| chr28              | 10194221 2 | 252 | T:0.698413        | C:0.301587       |
| chr28              | 10194540 3 | 282 | G:0.865248        | GTGC:0.0673759   |
| GTGCTGC:0.0673759  |            |     |                   |                  |
| chr28              | 10194740 2 | 300 | A:0.656667        | G:0.343333       |
| chr28              | 10195054 2 | 298 | CTT:0.862416      | C:0.137584       |
| chr28              | 10195593 2 | 306 | GTATT:0.77451     | G:0.22549        |
| chr28              | 10195621 3 | 316 | GT:0.64557        | G:0.0696203      |
| GTTTTT:0.28481     |            |     |                   |                  |
| chr28              | 10196362 2 | 308 | A:0.36039         | G:0.63961        |
| chr28              | 10196855 2 | 286 | CTT:0.968531      | C:0.0314685      |
| chr28              | 10196857 4 | 316 | TTTTTC:0.740506   | T:0.056962       |
| TTTCTTTTC:0.155063 |            |     |                   |                  |
| chr28              | 10196894 2 | 316 | T:0.908228        | TTTCTTTTTCTTTTC: |
| 0.0917722          |            |     |                   |                  |
| chr28              | 10196944 2 | 316 | C:0.971519        | CCTTT:0.028481   |
| chr28              | 10196965 2 | 312 | CTTTCTTT:0.971154 | C:               |
| 0.0288462          |            |     |                   |                  |
| chr28              | 10196972 2 | 310 | T:0.851613        | TC:0.148387      |
| chr28              | 10196985 2 | 308 | C:0.775974        | T:0.224026       |
| chr28              | 10198571 2 | 296 | A:0.280405        | AAATT:0.719595   |
| chr28              | 10198572 2 | 298 | A:0.879195        | AATT:0.120805    |
| chr28              | 10198658 4 | 318 | C:0.386792        | CATAA:0.361635   |
| CATAAATAA:0.144654 |            |     |                   |                  |
| chr28              | 10199197 2 | 294 | C:0.884354        | T:0.115646       |
| chr28              | 10199651 2 | 294 | C:0.142857        | CT:0.857143      |
| chr28              | 10199887 2 | 294 | TTTTA:0.863946    | T:0.136054       |
| chr28              | 10201240 2 | 292 | CATTT:0.0239726   | C:0.976027       |
| chr28              | 10201918 2 | 296 | C:0.837838        | T:0.162162       |
| chr28              | 10202452 2 | 304 | A:0.0263158       | G:0.973684       |
| chr28              | 10204117 2 | 310 | T:0.0225806       | A:0.977419       |
| chr28              | 10204662 2 | 298 | T:0.35906         | A:0.64094        |
| chr28              | 10204694 2 | 270 | C:0.992593        | CAG:0.00740741   |
| chr28              | 10204858 2 | 304 | T:0.328947        | C:0.671053       |
| chr28              | 10204975 2 | 304 | A:0.332237        | T:0.667763       |
| chr28              | 10206008 2 | 306 | C:0.957516        | T:0.0424837      |
| chr28              | 10206285 3 | 294 | TA:0.479592       | T:0.0646259      |
| TAA:0.455782       |            |     |                   |                  |
| chr28              | 10206466 2 | 296 | C:0               | T:1              |
| chr28              | 10206866 2 | 262 | C:0.717557        | CA:0.282443      |

|           |          |   |     |                 |                  |
|-----------|----------|---|-----|-----------------|------------------|
| chr28     | 10206960 | 2 | 296 | A:0.486486      | AT:0.513514      |
| chr28     | 10209139 | 2 | 250 | C:0.5 CT:0.5    |                  |
| chr28     | 10209599 | 2 | 266 | C:0.954887      | T:0.0451128      |
| chr28     | 10209824 | 2 | 302 | T:0.86755       | C:0.13245        |
| chr28     | 10210027 | 2 | 308 | T:0.363636      | TA:0.636364      |
| chr28     | 10210545 | 2 | 310 | G:0.651613      | C:0.348387       |
| chr28     | 10211524 | 2 | 300 | CAG:0.95 C:0.05 |                  |
| chr28     | 10211592 | 2 | 284 | C:0.901408      | T:0.0985915      |
| chr28     | 10211945 | 2 | 294 | G:0.360544      | A:0.639456       |
| chr28     | 10213084 | 2 | 300 | A:0.343333      | G:0.656667       |
| chr28     | 10214082 | 2 | 298 | C:0.959732      | T:0.0402685      |
| chr28     | 10215146 | 2 | 316 | TAA:0.933544    | T:0.0664557      |
| chr28     | 10215148 | 2 | 316 | A:0.933544      | ATTTTTTTTTTTTTT: |
| 0.0664557 |          |   |     |                 |                  |
| chr28     | 10215235 | 2 | 274 | A:0.635036      | G:0.364964       |
| chr28     | 10215560 | 2 | 194 | A:0.309278      | C:0.690722       |
| chr28     | 10215797 | 2 | 270 | CT:0.614815     | C:0.385185       |
| chr28     | 10216136 | 2 | 302 | T:0.665563      | G:0.334437       |
| chr28     | 10216903 | 2 | 300 | TTTTA:0.92      | T:0.08           |
| chr28     | 10217303 | 2 | 304 | C:0.355263      | G:0.644737       |
| chr28     | 10217443 | 2 | 306 | T:0.918301      | G:0.0816993      |
| chr28     | 10217656 | 2 | 298 | C:0.0033557     | T:0.996644       |
| chr28     | 10217667 | 2 | 298 | A:0 T:1         |                  |
| chr28     | 10217670 | 2 | 298 | A:0 T:1         |                  |
| chr28     | 10217684 | 2 | 290 | A:0 G:1         |                  |
| chr28     | 10217713 | 2 | 300 | G:0 C:1         |                  |
| chr28     | 10217717 | 2 | 300 | G:0 C:1         |                  |
| chr28     | 10217725 | 2 | 300 | G:0 A:1         |                  |
| chr28     | 10217727 | 2 | 300 | T:0 C:1         |                  |
| chr28     | 10217732 | 2 | 300 | TG:0 T:1        |                  |
| chr28     | 10217750 | 2 | 304 | G:0 T:1         |                  |
| chr28     | 10217757 | 2 | 304 | A:0 G:1         |                  |
| chr28     | 10217769 | 2 | 312 | C:0 CA:1        |                  |
| chr28     | 10217772 | 2 | 312 | G:0 T:1         |                  |
| chr28     | 10217773 | 2 | 312 | AT:0 A:1        |                  |
| chr28     | 10217776 | 2 | 312 | T:0 C:1         |                  |
| chr28     | 10217785 | 2 | 316 | G:0 GC:1        |                  |
| chr28     | 10217791 | 2 | 316 | TCTAG:0 T:1     |                  |
| chr28     | 10217796 | 2 | 316 | A:0 ATC:1       |                  |
| chr28     | 10217805 | 2 | 316 | A:0 T:1         |                  |
| chr28     | 10217814 | 2 | 316 | A:0 C:1         |                  |
| chr28     | 10217815 | 2 | 316 | C:0 A:1         |                  |
| chr28     | 10217816 | 2 | 316 | T:0 G:1         |                  |
| chr28     | 10217887 | 2 | 302 | G:0 A:1         |                  |
| chr28     | 10219877 | 2 | 296 | A:0.648649      | G:0.351351       |
| chr28     | 10220208 | 2 | 288 | G:0.0208333     | GA:0.979167      |
| chr28     | 10220401 | 2 | 306 | T:0.630719      | TC:0.369281      |
| chr28     | 10220414 | 2 | 304 | A:0.855263      | T:0.144737       |
| chr28     | 10220416 | 2 | 304 | A:0.302632      | T:0.697368       |
| chr28     | 10220438 | 2 | 288 | G:0.420139      | GT:0.579861      |
| chr28     | 10220523 | 2 | 300 | G:0.35 A:0.65   |                  |
| chr28     | 10220530 | 2 | 300 | G:0.983333      | A:0.0166667      |
| chr28     | 10220819 | 2 | 304 | A:0.927632      | T:0.0723684      |
| chr28     | 10220844 | 2 | 276 | T:0.684783      | C:0.315217       |



|                                |                  |   |     |                                             |               |
|--------------------------------|------------------|---|-----|---------------------------------------------|---------------|
| chr28                          | 10221024         | 2 | 310 | A:0                                         | G:1           |
| chr28                          | 10221026         | 2 | 310 | A:0                                         | G:1           |
| chr28                          | 10221031         | 2 | 310 | AG:0                                        | A:1           |
| chr28                          | 10221051         | 2 | 310 | G:0                                         | A:1           |
| chr28                          | 10221065         | 2 | 310 | A:0                                         | ATATT:1       |
| chr28                          | 10221066         | 2 | 310 | AAGGG:0                                     | A:1           |
| chr28                          | 10221075         | 2 | 310 | T:0                                         | A:1           |
| chr28                          | 10221092         | 2 | 310 | GAA:0                                       | G:1           |
| chr28                          | 10221094         | 2 | 310 | A:0                                         | ATTT:1        |
| chr28                          | 10221096         | 2 | 310 | C:0                                         | CT:1          |
| chr28                          | 10221102         | 2 | 310 | T:0                                         | TA:1          |
| chr28                          | 10221130         | 2 | 310 | G:0                                         | T:1           |
| chr28                          | 10221169         | 2 | 292 | A:0                                         | T:1           |
| chr28                          | 10221188         | 2 | 292 | G:0                                         | T:1           |
| chr28                          | 10221251         | 2 | 284 | C:0.96831                                   | CCT:0.0316901 |
| chr28                          | 10221651         | 2 | 282 | C:0.960993                                  | CT:0.0390071  |
| chr28                          | 10221784         | 2 | 302 | TTTCTTTC:0.556291                           | T:            |
| 0.443709                       |                  |   |     |                                             |               |
| chr28                          | 10221870         | 2 | 280 | CTCTTTCTTTCTTTCTTTCTTTCTT:0.771429          |               |
| C:0.228571                     |                  |   |     |                                             |               |
| chr28                          | 10222097         | 2 | 316 | TTCTTTCTTTCTTTCTTTCCTTTCTCTCTCTCTC:0.443038 | T:0.556962    |
| chr28                          | 10225079         | 2 | 294 | TCCC:0.37415                                | T:0.62585     |
| chr28                          | 10225082         | 2 | 294 | C:0.642857                                  | T:0.357143    |
| chr28                          | 10225086         | 2 | 258 | A:0.852713                                  | ATTC:0.147287 |
| chr28                          | 10225154         | 2 | 278 | G:0.971223                                  | A:0.028777    |
| chr28                          | 10226261         | 4 | 304 | CAG:0.450658                                | C:0.0921053   |
| CAGAG:0.256579                 | CAGAGAG:0.200658 |   |     |                                             |               |
| chr28                          | 10226865         | 2 | 308 | A:0.961039                                  | C:0.038961    |
| chr28                          | 10227301         | 2 | 308 | A:0.37013                                   | G:0.62987     |
| chr28                          | 10227734         | 3 | 244 | C:0.196721                                  | CT:0.553279   |
| CTT:0.25                       |                  |   |     |                                             |               |
| chr28                          | 10227822         | 2 | 292 | AT:0.667808                                 | A:0.332192    |
| chr28                          | 10228493         | 2 | 314 | TAAA:0.987261                               | T:0.0127389   |
| chr28                          | 10228498         | 2 | 314 | A:0.987261                                  | T:0.0127389   |
| chr28                          | 10228609         | 2 | 308 | C:0.863636                                  | T:0.136364    |
| chr28                          | 10229110         | 2 | 308 | GA:0.720779                                 | G:0.279221    |
| chr28                          | 10229543         | 2 | 302 | G:0.963576                                  | GT:0.0364238  |
| chr28                          | 10229764         | 2 | 302 | AT:0.642384                                 | A:0.357616    |
| chr28                          | 10229828         | 2 | 274 | C:0.627737                                  | CT:0.372263   |
| chr28                          | 10230082         | 2 | 300 | C:0.86                                      | A:0.14        |
| chr28                          | 10231615         | 2 | 302 | G:0.956954                                  | C:0.0430464   |
| chr28                          | 10231666         | 5 | 318 | TTATCTATCTATCTATC:0.191824                  |               |
| T:0.188679                     | TTATC:0.110063   |   |     | TTATCTATCTATC:0.380503                      |               |
| TTATCTATCTATCTATCTATC:0.128931 |                  |   |     |                                             |               |
| chr28                          | 10232630         | 2 | 306 | T:0.00326797                                | A:0.996732    |
| chr28                          | 10232644         | 2 | 306 | ATTT:0.00326797                             | A:0.996732    |
| chr28                          | 10232649         | 2 | 306 | T:0.00326797                                | TGG:0.996732  |
| chr28                          | 10232651         | 2 | 306 | A:0.00326797                                | G:0.996732    |
| chr28                          | 10232653         | 2 | 306 | GC:0.00326797                               | G:0.996732    |
| chr28                          | 10232658         | 2 | 306 | A:0.00326797                                | G:0.996732    |
| chr28                          | 10232662         | 2 | 306 | C:0.00326797                                | T:0.996732    |
| chr28                          | 10232681         | 2 | 306 | C:0.00326797                                | A:0.996732    |
| chr28                          | 10232696         | 2 | 306 | G:0.00326797                                | T:0.996732    |

|       |                       |     |                    |                 |
|-------|-----------------------|-----|--------------------|-----------------|
| chr28 | 10232705 2            | 306 | C:0.00326797       | A:0.996732      |
| chr28 | 10232731 2            | 300 | A:0 T:1            |                 |
| chr28 | 10232738 2            | 300 | T:0 A:1            |                 |
| chr28 | 10232760 2            | 300 | C:0 A:1            |                 |
| chr28 | 10232886 2            | 284 | GT:0.806338        | G:0.193662      |
| chr28 | 10233249 2            | 302 | T:0.34106          | A:0.65894       |
| chr28 | 10233584 2            | 284 | CT:0.362676        | C:0.637324      |
| chr28 | 10233628 3            | 290 | A:0.672414         | AAG:0.296552    |
|       | AAGAG:0.0310345       |     |                    |                 |
| chr28 | 10234058 2            | 304 | T:0.355263         | A:0.644737      |
| chr28 | 10234981 2            | 308 | TA:0.863636        | T:0.136364      |
| chr28 | 10236023 2            | 314 | CTGATTGAT:0.872611 | C:              |
|       | 0.127389              |     |                    |                 |
| chr28 | 10236871 2            | 294 | C:0.340136         | A:0.659864      |
| chr28 | 10237348 3            | 318 | T:0.704403         | TTTTTA:0.257862 |
|       | TTTTTATTTTA:0.0377358 |     |                    |                 |
| chr28 | 10237407 3            | 306 | CAG:0.820261       | C:0.0718954     |
|       | CAGAG:0.107843        |     |                    |                 |
| chr28 | 10237409 2            | 298 | G:0.691275         | C:0.308725      |
| chr28 | 10237514 2            | 266 | G:0.654135         | C:0.345865      |
| chr28 | 10237537 2            | 282 | G:0.663121         | A:0.336879      |
| chr28 | 10239051 2            | 294 | AGT:0.952381       | A:0.047619      |
| chr28 | 10239081 2            | 290 | T:0.668966         | A:0.331034      |
| chr28 | 10239174 2            | 304 | T:0.654605         | A:0.345395      |
| chr28 | 10241743 2            | 292 | C:0.952055         | T:0.0479452     |
| chr28 | 10241847 2            | 304 | A:0.375 T:0.625    |                 |
| chr28 | 10241959 2            | 298 | C:0.788591         | T:0.211409      |
| chr28 | 10242101 2            | 306 | A:0.647059         | C:0.352941      |
| chr28 | 10242211 2            | 304 | AT:0.572368        | A:0.427632      |
| chr28 | 10243424 2            | 314 | T:0.990446         | C:0.00955414    |
| chr28 | 10243517 2            | 320 | A:0.421875         | AAAAAC:0.578125 |
| chr28 | 10243960 2            | 302 | C:0.36755          | CCT:0.63245     |
| chr28 | 10244078 2            | 306 | T:0.333333         | G:0.666667      |
| chr28 | 10244190 2            | 296 | C:0.324324         | A:0.675676      |
| chr28 | 10244813 2            | 308 | A:0.655844         | G:0.344156      |
| chr28 | 10245114 3            | 290 | G:0.375862         | GT:0.47931      |
|       | GTT:0.144828          |     |                    |                 |
| chr28 | 10245632 2            | 308 | C:0.954545         | T:0.0454545     |
| chr28 | 10246538 2            | 308 | C:0.941558         | CT:0.0584416    |
| chr28 | 10246807 3            | 268 | CTT:0.436567       | C:0.466418      |
|       | CTTT:0.0970149        |     |                    |                 |
| chr28 | 10247331 2            | 286 | TA:0.632867        | T:0.367133      |
| chr28 | 10247387 2            | 284 | TA:0.841549        | T:0.158451      |
| chr28 | 10247592 2            | 228 | G:0.684211         | GT:0.315789     |
| chr28 | 10247617 2            | 270 | C:0.651852         | CT:0.348148     |
| chr28 | 10247886 2            | 308 | T:0.62987          | C:0.37013       |
| chr28 | 10248273 2            | 302 | AC:0.837748        | A:0.162252      |
| chr28 | 10248337 2            | 306 | T:0.954248         | TGAGA:0.0457516 |
| chr28 | 10250140 2            | 298 | A:0.681208         | G:0.318792      |
| chr28 | 10250481 2            | 308 | CT:0.850649        | C:0.149351      |
| chr28 | 10250920 2            | 306 | T:0.650327         | C:0.349673      |
| chr28 | 10251016 2            | 312 | T:0.987179         | G:0.0128205     |
| chr28 | 10252020 2            | 306 | G:0.74183          | A:0.25817       |
| chr28 | 10254917 2            | 268 | TCA:0.929104       | T:0.0708955     |



|                     |            |                        |                       |                 |
|---------------------|------------|------------------------|-----------------------|-----------------|
| chr28               | 10271879 2 | 304                    | C:0.641447            | CT:0.358553     |
| chr28               | 10272031 2 | 284                    | C:0.841549            | CT:0.158451     |
| chr28               | 10272409 2 | 282                    | C:0.659574            | CT:0.340426     |
| chr28               | 10272452 2 | 260                    | C:0.876923            | CAG:0.123077    |
| chr28               | 10273279 2 | 308                    | C:0.340909            | T:0.659091      |
| chr28               | 10273590 2 | 316                    | A:0 T:1               |                 |
| chr28               | 10273628 2 | 308                    | G:0 T:1               |                 |
| chr28               | 10273855 2 | 308                    | C:0.964286            | T:0.0357143     |
| chr28               | 10274988 2 | 310                    | C:0.645161            | CT:0.354839     |
| chr28               | 10275285 2 | 312                    | G:0.641026            | A:0.358974      |
| chr28               | 10275539 2 | 292                    | A:0.65411             | ATATG:0.34589   |
| chr28               | 10275577 2 | 304                    | G:0.871711            | A:0.128289      |
| chr28               | 10275764 2 | 304                    | G:0.345395            | A:0.654605      |
| chr28               | 10275837 2 | 308                    | T:0.318182            | A:0.681818      |
| chr28               | 10277251 2 | 306                    | C:0.653595            | A:0.346405      |
| chr28               | 10277361 2 | 304                    | T:0.674342            | TTTTTG:0.325658 |
| chr28               | 10277457 2 | 300                    | CTG:0.66 C:0.34       |                 |
| chr28               | 10277913 2 | 304                    | A:0.845395            | G:0.154605      |
| chr28               | 10278194 2 | 292                    | T:0 A:1               |                 |
| chr28               | 10278201 2 | 292                    | C:0 G:1               |                 |
| chr28               | 10278206 2 | 292                    | G:0 T:1               |                 |
| chr28               | 10278208 2 | 292                    | C:0 T:1               |                 |
| chr28               | 10278214 2 | 292                    | TA:0 T:1              |                 |
| chr28               | 10278235 2 | 294                    | C:0 A:1               |                 |
| chr28               | 10278245 2 | 294                    | T:0 A:1               |                 |
| chr28               | 10278248 2 | 294                    | C:0 T:1               |                 |
| chr28               | 10278252 2 | 294                    | T:0 A:1               |                 |
| chr28               | 10278278 2 | 306                    | G:0 T:1               |                 |
| chr28               | 10278281 2 | 306                    | A:0 T:1               |                 |
| chr28               | 10278287 2 | 306                    | G:0 T:1               |                 |
| chr28               | 10278347 2 | 310                    | G:0 T:1               |                 |
| chr28               | 10278366 2 | 304                    | T:0 TG:1              |                 |
| chr28               | 10278374 2 | 304                    | GA:0 G:1              |                 |
| chr28               | 10278377 2 | 304                    | A:0 T:1               |                 |
| chr28               | 10278380 2 | 304                    | C:0 T:1               |                 |
| chr28               | 10278383 2 | 304                    | C:0 T:1               |                 |
| chr28               | 10278384 2 | 304                    | G:0 GT:1              |                 |
| chr28               | 10278389 2 | 304                    | A:0 T:1               |                 |
| chr28               | 10278392 2 | 304                    | GA:0 G:1              |                 |
| chr28               | 10278414 2 | 284                    | G:0 T:1               |                 |
| chr28               | 10278426 2 | 306                    | A:0.0588235           | AG:0.941176     |
| chr28               | 10278427 2 | 306                    | A:0.0588235           | AT:0.941176     |
| chr28               | 10278429 2 | 306                    | C:0.0588235           | T:0.941176      |
| chr28               | 10278431 2 | 306                    | T:0.0588235           | TA:0.941176     |
| chr28               | 10278436 2 | 306                    | C:0.0588235           | CA:0.941176     |
| chr28               | 10278862 5 | 308                    | T:0.418831            | TGAGA:0.275974  |
| TGAGAGA:0.11039     |            | TGAGAGAGA:0.149351     | TGAGAGAGAGA:0.0454545 |                 |
| chr28               | 10280142 2 | 306                    | C:0.640523            | T:0.359477      |
| chr28               | 10282101 2 | 310                    | A:0.332258            | C:0.667742      |
| chr28               | 10283438 4 | 316                    | TATTC:0.262658        | T:0.496835      |
| TATTCATTC:0.0506329 |            | TATTCATTCATTC:0.189873 |                       |                 |
| chr28               | 10283617 2 | 302                    | C:0.950331            | T:0.0496689     |
| chr28               | 10283905 4 | 304                    | TCACACA:0.384868      | T:0.529605      |
| TCA:0.0328947       |            | TCACA:0.0526316        |                       |                 |

|       |            |     |                  |                   |
|-------|------------|-----|------------------|-------------------|
| chr28 | 10284389 2 | 300 | CT:0.916667      | C:0.0833333       |
| chr28 | 10284402 2 | 300 | T:0.35 A:0.65    |                   |
| chr28 | 10284429 2 | 282 | C:0.43617        | CAG:0.56383       |
| chr28 | 10284649 2 | 304 | T:0.855263       | G:0.144737        |
| chr28 | 10286031 2 | 290 | CT:0.334483      | C:0.665517        |
| chr28 | 10286311 2 | 280 | T:0.925 TA:0.075 |                   |
| chr28 | 10286602 2 | 184 | TG:0.679348      | T:0.320652        |
| chr28 | 10286866 2 | 286 | A:0.423077       | AT:0.576923       |
| chr28 | 10288118 2 | 304 | C:0.351974       | A:0.648026        |
| chr28 | 10289368 2 | 314 | AAATG:0.659236   | A:0.340764        |
| chr28 | 10290222 2 | 306 | C:0.362745       | T:0.637255        |
| chr28 | 10291300 2 | 304 | T:0.983553       | A:0.0164474       |
| chr28 | 10291599 2 | 302 | T:0.327815       | G:0.672185        |
| chr28 | 10292188 2 | 302 | G:0.956954       | GC:0.0430464      |
| chr28 | 10292196 2 | 304 | C:0.868421       | A:0.131579        |
| chr28 | 10293113 2 | 296 | A:0.763514       | AC:0.236486       |
| chr28 | 10293942 2 | 314 | A:0.872611       | G:0.127389        |
| chr28 | 10293975 2 | 312 | CTG:0.355769     | C:0.644231        |
| chr28 | 10295027 2 | 314 | G:0.993631       | T:0.00636943      |
| chr28 | 10296691 2 | 304 | C:0.345395       | A:0.654605        |
| chr28 | 10297215 2 | 170 | A:0.864706       | AT:0.135294       |
| chr28 | 10297228 2 | 146 | A:0.342466       | AT:0.657534       |
| chr28 | 10297234 2 | 172 | T:0.877907       | TA:0.122093       |
| chr28 | 10297242 2 | 152 | A:0.796053       | T:0.203947        |
| chr28 | 10297584 2 | 308 | T:0.951299       | G:0.0487013       |
| chr28 | 10298321 2 | 272 | T:0.341912       | G:0.658088        |
| chr28 | 10299018 2 | 310 | A:0.329032       | C:0.670968        |
| chr28 | 10299242 2 | 304 | G:0.351974       | GTGATGA:0.648026  |
| chr28 | 10299389 2 | 280 | AG:0.942857      | A:0.0571429       |
| chr28 | 10299571 2 | 296 | CT:0.915541      | C:0.0844595       |
| chr28 | 10299671 2 | 292 | G:0.633562       | A:0.366438        |
| chr28 | 10300921 2 | 296 | T:0.320946       | C:0.679054        |
| chr28 | 10303275 2 | 310 | T:0.893548       | TAATAATTAAATA:    |
|       | 0.106452   |     |                  |                   |
| chr28 | 10303278 2 | 272 | TA:0.838235      | T:0.161765        |
| chr28 | 10303281 2 | 260 | A:0.811538       | T:0.188462        |
| chr28 | 10303282 2 | 272 | TAAA:0.838235    | T:0.161765        |
| chr28 | 10303322 2 | 308 | T:0.892857       | TAAATAAA:0.107143 |
| chr28 | 10305770 2 | 304 | GT:0.351974      | G:0.648026        |
| chr28 | 10306110 2 | 310 | G:0.977419       | A:0.0225806       |
| chr28 | 10306667 3 | 284 | G:0.362676       | GT:0.137324       |
|       | GTT:0.5    |     |                  |                   |
| chr28 | 10308168 2 | 300 | CTTTG:0.95       | C:0.05            |
| chr28 | 10308216 2 | 274 | TA:0.715328      | T:0.284672        |
| chr28 | 10308710 2 | 306 | T:0.986928       | C:0.0130719       |
| chr28 | 10309124 2 | 316 | T:0.905063       | TCTTCTCCTTCTC:    |
|       | 0.0949367  |     |                  |                   |
| chr28 | 10309226 2 | 308 | T:0.99026        | A:0.00974026      |
| chr28 | 10309300 2 | 298 | G:0.630872       | A:0.369128        |
| chr28 | 10309586 2 | 300 | T:0.33 TTG:0.67  |                   |
| chr28 | 10309762 2 | 314 | C:0.977707       | T:0.022293        |
| chr28 | 10314496 2 | 308 | AG:0.318182      | A:0.681818        |
| chr28 | 10318186 2 | 296 | T:0.351351       | G:0.648649        |
| chr28 | 10320740 2 | 304 | C:0.868421       | T:0.131579        |

|              |          |   |     |                      |                |
|--------------|----------|---|-----|----------------------|----------------|
| chr28        | 10322045 | 2 | 310 | T:0.96129            | A:0.0387097    |
| chr28        | 10322857 | 2 | 304 | G:0.861842           | A:0.138158     |
| chr28        | 10323774 | 2 | 308 | A:0.857143           | G:0.142857     |
| chr28        | 10324368 | 2 | 286 | TAC:0.853147         | T:0.146853     |
| chr28        | 10326115 | 2 | 306 | A:0.69281            | T:0.30719      |
| chr28        | 10326851 | 2 | 290 | T:0.834483           | TA:0.165517    |
| chr28        | 10327782 | 2 | 306 | TA:0.660131          | T:0.339869     |
| chr28        | 10328178 | 2 | 308 | AG:0.974026          | A:0.025974     |
| chr28        | 10328491 | 2 | 276 | C:0.532609           | CCTCT:0.467391 |
| chr28        | 10329049 | 3 | 270 | TA:0.277778          | T:0.444444     |
| TAA:0.277778 |          |   |     |                      |                |
| chr28        | 10330111 | 2 | 298 | G:0.989933           | A:0.0100671    |
| chr28        | 10330709 | 2 | 258 | G:0                  | T:1            |
| chr28        | 10330904 | 2 | 294 | TA:0.547619          | T:0.452381     |
| chr28        | 10331042 | 2 | 300 | A:0.983333           | T:0.0166667    |
| chr28        | 10331876 | 2 | 306 | G:0.980392           | A:0.0196078    |
| chr28        | 10333265 | 2 | 302 | C:0.688742           | T:0.311258     |
| chr28        | 10333520 | 2 | 296 | G:0.668919           | A:0.331081     |
| chr28        | 10335857 | 2 | 310 | G:0.987097           | A:0.0129032    |
| chr28        | 10336123 | 2 | 312 | CTTTG:0.679487       | C:0.320513     |
| chr28        | 10336126 | 2 | 312 | T:0.326923           | G:0.673077     |
| chr28        | 10336127 | 2 | 312 | G:0.326923           | T:0.673077     |
| chr28        | 10337878 | 2 | 308 | TTAGCTGCATG:0.922078 | T:             |
| 0.0779221    |          |   |     |                      |                |
| chr28        | 10338084 | 2 | 300 | A:0.68               | AT:0.32        |
| chr28        | 10338969 | 2 | 312 | A:0.666667           | G:0.333333     |
| chr28        | 10342121 | 2 | 306 | C:0.964052           | G:0.0359477    |
| chr28        | 10345207 | 2 | 296 | G:0.341216           | T:0.658784     |
| chr28        | 10346971 | 2 | 294 | A:0.687075           | AT:0.312925    |
| chr28        | 10346982 | 2 | 304 | AT:0.921053          | A:0.0789474    |
| chr28        | 10346991 | 2 | 306 | T:0.970588           | A:0.0294118    |
| chr28        | 10347370 | 2 | 292 | G:0.972603           | T:0.0273973    |
| chr28        | 10347881 | 2 | 294 | T:0.687075           | C:0.312925     |
| chr28        | 10348188 | 2 | 290 | G:0.986207           | A:0.0137931    |
| chr28        | 10348754 | 2 | 300 | T:0                  | C:1            |
| chr28        | 10350541 | 2 | 308 | C:0.974026           | T:0.025974     |
| chr28        | 10352784 | 2 | 288 | T:0.291667           | G:0.708333     |
| chr28        | 10353339 | 2 | 190 | C:0.731579           | T:0.268421     |
| chr28        | 10353730 | 2 | 288 | C:0.822917           | A:0.177083     |
| chr28        | 10353892 | 2 | 290 | C:0.97931            | T:0.0206897    |
| chr28        | 10354223 | 2 | 296 | T:0.736486           | C:0.263514     |
| chr28        | 10354372 | 2 | 296 | G:0.672297           | GC:0.327703    |
| chr28        | 10354374 | 2 | 296 | G:0.672297           | T:0.327703     |
| chr28        | 10354908 | 2 | 300 | C:0.986667           | T:0.0133333    |
| chr28        | 10355356 | 2 | 274 | C:0.715328           | CA:0.284672    |
| chr28        | 10355921 | 2 | 306 | A:0.323529           | G:0.676471     |
| chr28        | 10356475 | 2 | 244 | TG:0.82377           | T:0.17623      |
| chr28        | 10357042 | 2 | 288 | T:0.697917           | C:0.302083     |
| chr28        | 10358217 | 2 | 270 | TA:0.87037           | T:0.12963      |
| chr28        | 10358632 | 2 | 294 | C:0.333333           | A:0.666667     |
| chr28        | 10358988 | 2 | 296 | G:0.952703           | A:0.0472973    |
| chr28        | 10359688 | 2 | 306 | C:0.980392           | T:0.0196078    |
| chr28        | 10360705 | 2 | 300 | T:0                  | A:1            |
| chr28        | 10360707 | 2 | 300 | A:0                  | AT:1           |

|                           |            |     |              |         |                 |
|---------------------------|------------|-----|--------------|---------|-----------------|
| chr28                     | 10360711 2 | 300 | G:0          | T:1     |                 |
| chr28                     | 10360718 2 | 300 | A:0          | AT:1    |                 |
| chr28                     | 10360739 2 | 304 | T:0          | G:1     |                 |
| chr28                     | 10360895 2 | 306 | A:0.316993   |         | G:0.683007      |
| chr28                     | 10361065 2 | 302 | G:0.307947   |         | A:0.692053      |
| chr28                     | 10361098 2 | 298 | T:0.318792   |         | C:0.681208      |
| chr28                     | 10362366 2 | 300 | C:0.303333   |         | G:0.696667      |
| chr28                     | 10363075 3 | 282 | ATG:0.882979 |         | A:0.0780142     |
| ATGTG:0.0390071           |            |     |              |         |                 |
| chr28                     | 10363085 2 | 274 | G:0.883212   |         | GTA:0.116788    |
| chr28                     | 10363087 4 | 288 | G:0.541667   |         | A:0.204861      |
| GTA:0.0625 GTATA:0.190972 |            |     |              |         |                 |
| chr28                     | 10363501 2 | 310 | C:0.96129    |         | T:0.0387097     |
| chr28                     | 10363642 2 | 304 | G:0.322368   |         | A:0.677632      |
| chr28                     | 10363714 2 | 304 | G:0.654605   |         | C:0.345395      |
| chr28                     | 10363864 2 | 282 | T:0.319149   |         | C:0.680851      |
| chr28                     | 10364030 2 | 302 | G:0.655629   |         | C:0.344371      |
| chr28                     | 10364043 2 | 306 | G:0.336601   |         | A:0.663399      |
| chr28                     | 10365147 2 | 270 | G:0.677778   |         | A:0.322222      |
| chr28                     | 10365157 2 | 270 | A:0.974074   |         | C:0.0259259     |
| chr28                     | 10365235 2 | 308 | G:0.672078   |         | GAACGCTGCAGCCC: |
| 0.327922                  |            |     |              |         |                 |
| chr28                     | 10365596 2 | 288 | G:0.694444   |         | A:0.305556      |
| chr28                     | 10365841 2 | 300 | CGG:0.33     | C:0.67  |                 |
| chr28                     | 10365890 2 | 302 | T:0.304636   |         | C:0.695364      |
| chr28                     | 10366396 2 | 298 | C:0.95302    |         | T:0.0469799     |
| chr28                     | 10366452 2 | 292 | C:0.952055   |         | T:0.0479452     |
| chr28                     | 10366773 2 | 280 | G:0.935714   |         | A:0.0642857     |
| chr28                     | 10366873 2 | 282 | G:0.301418   |         | A:0.698582      |
| chr28                     | 10367446 2 | 304 | CCG:0.756579 |         | C:0.243421      |
| chr28                     | 10367453 2 | 304 | C:0.756579   |         | CACACA:0.243421 |
| chr28                     | 10367644 2 | 292 | C:0.688356   |         | T:0.311644      |
| chr28                     | 10367688 2 | 282 | G:0          | C:1     |                 |
| chr28                     | 10367732 2 | 286 | G:0.304196   |         | T:0.695804      |
| chr28                     | 10368120 2 | 304 | T:0.305921   |         | C:0.694079      |
| chr28                     | 10369407 2 | 278 | A:0.917266   |         | AGT:0.0827338   |
| chr28                     | 10370816 2 | 296 | G:0          | A:1     |                 |
| chr28                     | 10370817 2 | 296 | A:0          | T:1     |                 |
| chr28                     | 10370858 2 | 302 | T:0          | C:1     |                 |
| chr28                     | 10370865 2 | 302 | C:0          | G:1     |                 |
| chr28                     | 10370866 2 | 302 | TCCCC:0      | T:1     |                 |
| chr28                     | 10370872 2 | 302 | C:0          | CTATG:1 |                 |
| chr28                     | 10370927 2 | 268 | T:0          | TA:1    |                 |
| chr28                     | 10374078 2 | 300 | C:0.45       | T:0.55  |                 |
| chr28                     | 10377572 2 | 298 | C:0.996644   |         | T:0.0033557     |
| chr28                     | 10378750 2 | 276 | A:0.847826   |         | G:0.152174      |
| chr28                     | 10378769 2 | 276 | G:0.851449   |         | A:0.148551      |
| chr28                     | 10379163 2 | 250 | C:0.872      | T:0.128 |                 |
| chr28                     | 10379774 2 | 276 | G:0.836957   |         | C:0.163043      |
| chr28                     | 10379827 2 | 288 | T:0.854167   |         | C:0.145833      |
| chr28                     | 10379987 2 | 286 | A:0.867133   |         | G:0.132867      |
| chr28                     | 10380811 2 | 304 | C:0.842105   |         | A:0.157895      |
| chr28                     | 10381643 2 | 284 | A:0.866197   |         | G:0.133803      |
| chr28                     | 10381703 2 | 288 | C:0.996528   |         | T:0.00347222    |

|            |          |   |     |                                |                  |
|------------|----------|---|-----|--------------------------------|------------------|
| chr28      | 10381792 | 2 | 260 | G:0.938462                     | A:0.0615385      |
| chr28      | 10381872 | 2 | 310 | TCC:0.683871                   | T:0.316129       |
| chr28      | 10381875 | 2 | 310 | TCTCCTCTCCTCCTCCCTCCC:0.683871 |                  |
| T:0.316129 |          |   |     |                                |                  |
| chr28      | 10382353 | 2 | 292 | C:0.849315                     | G:0.150685       |
| chr28      | 10382580 | 2 | 290 | C:0.565517                     | T:0.434483       |
| chr28      | 10383052 | 2 | 294 | A:0.85034                      | T:0.14966        |
| chr28      | 10383887 | 2 | 302 | A:0.86755                      | G:0.13245        |
| chr28      | 10384028 | 2 | 298 | A:0.85906                      | G:0.14094        |
| chr28      | 10384349 | 2 | 284 | C:0.869718                     | T:0.130282       |
| chr28      | 10384687 | 2 | 302 | T:0.880795                     | C:0.119205       |
| chr28      | 10385385 | 2 | 294 | G:0.0102041                    | C:0.989796       |
| chr28      | 10385825 | 2 | 300 | G:0.863333                     | A:0.136667       |
| chr28      | 10385939 | 2 | 310 | A:0.870968                     | G:0.129032       |
| chr28      | 10385971 | 2 | 298 | G:0.872483                     | GA:0.127517      |
| chr28      | 10385974 | 2 | 298 | G:0.872483                     | A:0.127517       |
| chr28      | 10386297 | 2 | 286 | T:0.867133                     | C:0.132867       |
| chr28      | 10386315 | 2 | 286 | G:0.867133                     | C:0.132867       |
| chr28      | 10386328 | 2 | 264 | A:0.977273                     | G:0.0227273      |
| chr28      | 10386501 | 2 | 272 | G:0.893382                     | GA:0.106618      |
| chr28      | 10386609 | 2 | 280 | A:0.875                        | T:0.125          |
| chr28      | 10386908 | 2 | 306 | C:0.862745                     | T:0.137255       |
| chr28      | 10386918 | 2 | 306 | T:0.862745                     | A:0.137255       |
| chr28      | 10387323 | 2 | 298 | C:0.862416                     | T:0.137584       |
| chr28      | 10387401 | 2 | 288 | G:0.961806                     | A:0.0381944      |
| chr28      | 10387594 | 2 | 296 | T:0.861486                     | C:0.138514       |
| chr28      | 10387806 | 2 | 258 | A:0.856589                     | G:0.143411       |
| chr28      | 10388313 | 2 | 298 | T:0.872483                     | C:0.127517       |
| chr28      | 10388466 | 2 | 294 | TG:0.867347                    | T:0.132653       |
| chr28      | 10388628 | 2 | 302 | T:0.86755                      | TA:0.13245       |
| chr28      | 10388841 | 2 | 280 | A:0.842857                     | G:0.157143       |
| chr28      | 10389161 | 2 | 198 | C:0.868687                     | T:0.131313       |
| chr28      | 10389928 | 2 | 302 | A:0.847682                     | ATTCATT:0.152318 |
| chr28      | 10390280 | 2 | 298 | C:0.869128                     | T:0.130872       |
| chr28      | 10390562 | 2 | 274 | A:0.90146                      | C:0.0985401      |
| chr28      | 10390574 | 2 | 280 | T:0.914286                     | C:0.0857143      |
| chr28      | 10391260 | 2 | 258 | CA:0                           | C:1              |
| chr28      | 10391476 | 2 | 292 | G:0.866438                     | C:0.133562       |
| chr28      | 10391557 | 2 | 292 | C:0.849315                     | T:0.150685       |
| chr28      | 10391721 | 2 | 292 | G:0.84589                      | A:0.15411        |
| chr28      | 10391895 | 2 | 298 | C:0.865772                     | T:0.134228       |
| chr28      | 10392035 | 2 | 296 | C:0.871622                     | T:0.128378       |
| chr28      | 10392085 | 2 | 292 | G:0.797945                     | T:0.202055       |
| chr28      | 10392319 | 2 | 290 | CG:0                           | C:1              |
| chr28      | 10392365 | 2 | 292 | G:0.859589                     | A:0.140411       |
| chr28      | 10392446 | 2 | 298 | T:0.855705                     | C:0.144295       |
| chr28      | 10392796 | 2 | 290 | T:0.858621                     | C:0.141379       |
| chr28      | 10392902 | 2 | 282 | A:0.893617                     | G:0.106383       |
| chr28      | 10393550 | 2 | 294 | C:0.846939                     | G:0.153061       |
| chr28      | 10393652 | 2 | 292 | G:0.876712                     | GC:0.123288      |
| chr28      | 10393861 | 2 | 296 | C:0.871622                     | T:0.128378       |
| chr28      | 10394024 | 2 | 292 | T:0.84589                      | C:0.15411        |
| chr28      | 10394271 | 2 | 284 | AT:0.862676                    | A:0.137324       |
| chr28      | 10394288 | 2 | 290 | C:0.848276                     | A:0.151724       |



|                |          |   |     |              |               |
|----------------|----------|---|-----|--------------|---------------|
| chr28          | 10394868 | 2 | 308 | G:0.853896   | A:0.146104    |
| chr28          | 10394921 | 2 | 302 | G:0.854305   | T:0.145695    |
| chr28          | 10395152 | 2 | 312 | G:0.871795   | A:0.128205    |
| chr28          | 10395369 | 2 | 296 | G:0.85473    | C:0.14527     |
| chr28          | 10395401 | 2 | 304 | T:0.855263   | TA:0.144737   |
| chr28          | 10395424 | 2 | 304 | C:0.855263   | CA:0.144737   |
| chr28          | 10395599 | 2 | 294 | G:0.853741   | T:0.146259    |
| chr28          | 10395865 | 2 | 290 | A:0          | T:1           |
| chr28          | 10395870 | 2 | 298 | C:0.848993   | T:0.151007    |
| chr28          | 10395873 | 2 | 290 | C:0          | A:1           |
| chr28          | 10395874 | 2 | 290 | A:0          | T:1           |
| chr28          | 10395884 | 2 | 298 | G:0.848993   | A:0.151007    |
| chr28          | 10396284 | 3 | 280 | A:0.282143   | AG:0.121429   |
| AAGAG:0.596429 |          |   |     |              |               |
| chr28          | 10396416 | 2 | 266 | G:0.842105   | C:0.157895    |
| chr28          | 10396706 | 2 | 226 | C:0.207965   | A:0.792035    |
| chr28          | 10396711 | 2 | 242 | T:0.892562   | A:0.107438    |
| chr28          | 10396728 | 2 | 238 | A:0.962185   | T:0.0378151   |
| chr28          | 10397205 | 2 | 294 | T:0.880952   | C:0.119048    |
| chr28          | 10397433 | 2 | 302 | T:0.86755    | C:0.13245     |
| chr28          | 10397476 | 2 | 296 | T:0.986486   | G:0.0135135   |
| chr28          | 10397487 | 2 | 296 | G:0.989865   | A:0.0101351   |
| chr28          | 10397646 | 2 | 284 | GC:0.876761  | G:0.123239    |
| chr28          | 10397753 | 2 | 304 | A:0.845395   | C:0.154605    |
| chr28          | 10398029 | 2 | 308 | C:0.863636   | T:0.136364    |
| chr28          | 10398460 | 2 | 304 | T:0.851974   | C:0.148026    |
| chr28          | 10398873 | 2 | 298 | C:0.875839   | T:0.124161    |
| chr28          | 10399254 | 2 | 300 | G:0.87       | A:0.13        |
| chr28          | 10399272 | 2 | 314 | A:0.993631   | AGGAGGAGCAGG: |
| 0.00636943     |          |   |     |              |               |
| chr28          | 10399274 | 2 | 314 | CCA:0.993631 | C:0.00636943  |
| chr28          | 10399850 | 2 | 304 | C:0.993421   | G:0.00657895  |
| chr28          | 10400340 | 2 | 306 | C:0.862745   | T:0.137255    |
| chr28          | 10400437 | 2 | 296 | G:0.986486   | A:0.0135135   |
| chr28          | 10400982 | 2 | 296 | T:0.871622   | C:0.128378    |
| chr28          | 10401034 | 2 | 288 | T:0.878472   | C:0.121528    |
| chr28          | 10401176 | 2 | 304 | A:0.858553   | T:0.141447    |
| chr28          | 10401361 | 2 | 298 | A:0.865772   | G:0.134228    |
| chr28          | 10401442 | 2 | 296 | C:0.868243   | T:0.131757    |
| chr28          | 10401785 | 2 | 296 | C:0.983108   | T:0.0168919   |
| chr28          | 10401793 | 2 | 296 | G:0.983108   | A:0.0168919   |
| chr28          | 10402031 | 2 | 296 | G:0.864865   | A:0.135135    |
| chr28          | 10402078 | 2 | 286 | T:0.853147   | C:0.146853    |
| chr28          | 10402969 | 2 | 302 | C:0.986755   | T:0.013245    |
| chr28          | 10403312 | 2 | 308 | A:0.883117   | C:0.116883    |
| chr28          | 10403318 | 2 | 308 | G:0.883117   | A:0.116883    |
| chr28          | 10403424 | 2 | 300 | C:0.87       | T:0.13        |
| chr28          | 10403627 | 2 | 288 | T:0.864583   | G:0.135417    |
| chr28          | 10403866 | 2 | 284 | T:0.0176056  | C:0.982394    |
| chr28          | 10403925 | 2 | 282 | A:0.897163   | G:0.102837    |
| chr28          | 10404228 | 2 | 276 | A:0.884058   | G:0.115942    |
| chr28          | 10404455 | 2 | 242 | G:0          | GT:1          |
| chr28          | 10404475 | 2 | 242 | T:0          | TA:1          |
| chr28          | 10404477 | 2 | 242 | GA:0         | G:1           |

|       |              |     |                  |         |              |
|-------|--------------|-----|------------------|---------|--------------|
| chr28 | 10404483 2   | 242 | AC:0             | A:1     |              |
| chr28 | 10404523 2   | 282 | C:0.29078        |         | CT:0.70922   |
| chr28 | 10404526 2   | 282 | A:0.29078        |         | G:0.70922    |
| chr28 | 10404528 2   | 282 | A:0.29078        |         | G:0.70922    |
| chr28 | 10404530 2   | 282 | CG:0.29078       |         | C:0.70922    |
| chr28 | 10404532 2   | 282 | CG:0.29078       |         | C:0.70922    |
| chr28 | 10404536 2   | 282 | C:0.29078        |         | A:0.70922    |
| chr28 | 10404538 2   | 282 | C:0.29078        |         | A:0.70922    |
| chr28 | 10404550 2   | 282 | CCCCCCCCCCTCCCG: | 0.29078 | C:           |
|       | 0.70922      |     |                  |         |              |
| chr28 | 10404948 2   | 296 | T:0.885135       |         | C:0.114865   |
| chr28 | 10405303 2   | 302 | T:0.877483       |         | C:0.122517   |
| chr28 | 10405445 2   | 284 | G:0.81338        |         | A:0.18662    |
| chr28 | 10405479 2   | 270 | T:0              | TG:1    |              |
| chr28 | 10405525 2   | 280 | G:0              | GT:1    |              |
| chr28 | 10405526 2   | 280 | A:0              | G:1     |              |
| chr28 | 10405552 2   | 302 | A:0              | AT:1    |              |
| chr28 | 10405745 2   | 296 | T:0.885135       |         | C:0.114865   |
| chr28 | 10405770 2   | 288 | G:0.993056       |         | A:0.00694444 |
| chr28 | 10405847 2   | 286 | G:0.867133       |         | A:0.132867   |
| chr28 | 10406752 2   | 304 | C:0.914474       |         | T:0.0855263  |
| chr28 | 10407069 2   | 298 | G:0.989933       |         | A:0.0100671  |
| chr28 | 10407082 2   | 294 | G:0.880952       |         | A:0.119048   |
| chr28 | 10407326 2   | 302 | A:0.877483       |         | AT:0.122517  |
| chr28 | 10407690 2   | 296 | T:0.871622       |         | C:0.128378   |
| chr28 | 10407941 2   | 302 | G:0.990066       |         | A:0.00993377 |
| chr28 | 10407944 2   | 302 | A:0.990066       |         | G:0.00993377 |
| chr28 | 10408200 2   | 310 | T:0.990323       |         | C:0.00967742 |
| chr28 | 10408224 2   | 310 | G:0.990323       |         | A:0.00967742 |
| chr28 | 10408225 2   | 304 | C:0.963816       |         | A:0.0361842  |
| chr28 | 10408264 2   | 306 | A:0.954248       |         | C:0.0457516  |
| chr28 | 10408297 2   | 308 | G:0.996753       |         | A:0.00324675 |
| chr28 | 10408306 2   | 308 | C:0.996753       |         | T:0.00324675 |
| chr28 | 10409581 2   | 298 | C:0.993289       |         | T:0.00671141 |
| chr28 | 10409893 3   | 288 | CCTCT:0.444444   |         | C:0.295139   |
|       | CCT:0.260417 |     |                  |         |              |
| chr28 | 10410057 2   | 300 | G:0.88           | A:0.12  |              |
| chr28 | 10410061 2   | 300 | T:0.88           | C:0.12  |              |
| chr28 | 10410483 2   | 294 | T:0.840136       |         | C:0.159864   |
| chr28 | 10410673 2   | 298 | C:0.989933       |         | A:0.0100671  |
| chr28 | 10410775 2   | 296 | GACT:0.983108    |         | G:0.0168919  |
| chr28 | 10410995 2   | 308 | A:0.99026        |         | T:0.00974026 |
| chr28 | 10411027 2   | 302 | G:0.874172       |         | A:0.125828   |
| chr28 | 10411592 2   | 300 | C:0.916667       |         | CT:0.0833333 |
| chr28 | 10411745 2   | 306 | C:0.986928       |         | T:0.0130719  |
| chr28 | 10411760 2   | 306 | A:0.986928       |         | C:0.0130719  |
| chr28 | 10411798 2   | 300 | C:0.993333       |         | T:0.00666667 |
| chr28 | 10411853 2   | 302 | T:0.990066       |         | A:0.00993377 |
| chr28 | 10412125 2   | 304 | T:0.858553       |         | C:0.141447   |
| chr28 | 10412330 2   | 302 | A:0.990066       |         | G:0.00993377 |
| chr28 | 10412347 2   | 302 | G:0.990066       |         | A:0.00993377 |
| chr28 | 10412552 2   | 300 | C:0.996667       |         | T:0.00333333 |
| chr28 | 10412857 2   | 274 | T:0.846715       |         | TC:0.153285  |
| chr28 | 10413499 2   | 308 | C:0.866883       |         | CG:0.133117  |

|                           |          |   |     |                        |                 |
|---------------------------|----------|---|-----|------------------------|-----------------|
| chr28                     | 10413599 | 2 | 302 | C:0.903974             | A:0.0960265     |
| chr28                     | 10413685 | 2 | 308 | A:0.876623             | G:0.123377      |
| chr28                     | 10414238 | 2 | 290 | C:0.986207             | CT:0.0137931    |
| chr28                     | 10414470 | 2 | 288 | T:0.871528             | C:0.128472      |
| chr28                     | 10414517 | 2 | 284 | G:0.869718             | A:0.130282      |
| chr28                     | 10414527 | 2 | 284 | C:0.869718             | T:0.130282      |
| chr28                     | 10415601 | 2 | 294 | AAAAAT:0.97619         | A:0.0238095     |
| chr28                     | 10415621 | 2 | 298 | TAAAATAAATA:0.932886   | T:              |
| 0.0671141                 |          |   |     |                        |                 |
| chr28                     | 10415626 | 2 | 314 | T:0.863057             | TAAATA:0.136943 |
| chr28                     | 10417377 | 3 | 310 | CGAGAGAGAGAGA:0.674194 | C:              |
| 0.222581 CGAGAGA:0.103226 |          |   |     |                        |                 |
| chr28                     | 10417383 | 2 | 316 | A:0.993671             | ATC:0.00632911  |
| chr28                     | 10417945 | 2 | 304 | G:0.881579             | A:0.118421      |
| chr28                     | 10418020 | 2 | 298 | C:0.761745             | A:0.238255      |
| chr28                     | 10418409 | 2 | 286 | C:0.986014             | T:0.013986      |
| chr28                     | 10418813 | 3 | 296 | CAT:0.547297           | C:0.138514      |
| CATAT:0.314189            |          |   |     |                        |                 |
| chr28                     | 10418846 | 2 | 298 | T:0.875839             | A:0.124161      |
| chr28                     | 10418874 | 2 | 308 | G:0.886364             | GTGTATATA:      |
| 0.113636                  |          |   |     |                        |                 |
| chr28                     | 10419697 | 2 | 300 | A:0.856667             | C:0.143333      |
| chr28                     | 10419784 | 2 | 290 | T:0.775862             | TA:0.224138     |
| chr28                     | 10420261 | 2 | 304 | T:0.865132             | C:0.134868      |
| chr28                     | 10420334 | 2 | 314 | T:0.984076             | C:0.0159236     |
| chr28                     | 10420397 | 2 | 318 | G:0.874214             | T:0.125786      |
| chr28                     | 10420564 | 2 | 300 | T:0.86                 | C:0.14          |
| chr28                     | 10420766 | 2 | 312 | A:0.858974             | G:0.141026      |
| chr28                     | 10420781 | 2 | 312 | A:0.858974             | G:0.141026      |
| chr28                     | 10421296 | 2 | 306 | T:0.872549             | G:0.127451      |
| chr28                     | 10421541 | 2 | 296 | T:0.864865             | C:0.135135      |
| chr28                     | 10421665 | 2 | 284 | A:0.862676             | G:0.137324      |
| chr28                     | 10422136 | 2 | 296 | T:0.837838             | TA:0.162162     |
| chr28                     | 10423036 | 2 | 302 | A:0.890728             | G:0.109272      |
| chr28                     | 10423544 | 2 | 310 | C:0.858065             | T:0.141935      |
| chr28                     | 10423594 | 2 | 306 | G:0.862745             | C:0.137255      |
| chr28                     | 10423598 | 2 | 306 | A:0.862745             | C:0.137255      |
| chr28                     | 10423967 | 2 | 306 | C:0.970588             | T:0.0294118     |
| chr28                     | 10424083 | 2 | 296 | A:0.868243             | G:0.131757      |
| chr28                     | 10424214 | 2 | 308 | C:0.834416             | T:0.165584      |
| chr28                     | 10424321 | 2 | 306 | T:0.875817             | TG:0.124183     |
| chr28                     | 10424506 | 2 | 310 | C:0.870968             | T:0.129032      |
| chr28                     | 10424645 | 2 | 298 | A:0.872483             | C:0.127517      |
| chr28                     | 10424808 | 2 | 290 | G:0.872414             | A:0.127586      |
| chr28                     | 10424814 | 2 | 290 | A:0.872414             | G:0.127586      |
| chr28                     | 10424852 | 2 | 286 | C:0.846154             | CT:0.153846     |
| chr28                     | 10424875 | 2 | 300 | A:0.846667             | G:0.153333      |
| chr28                     | 10425041 | 2 | 288 | CGTGTGT:0.645833       | C:0.354167      |
| chr28                     | 10425511 | 2 | 306 | G:0.846405             | A:0.153595      |
| chr28                     | 10425606 | 2 | 298 | T:0.869128             | C:0.130872      |
| chr28                     | 10425839 | 2 | 298 | T:0.838926             | A:0.161074      |
| chr28                     | 10425952 | 2 | 302 | C:0.874172             | T:0.125828      |
| chr28                     | 10427022 | 2 | 304 | GC:0.871711            | G:0.128289      |
| chr28                     | 10427176 | 2 | 294 | G:0.877551             | A:0.122449      |

|           |          |   |     |                      |                   |
|-----------|----------|---|-----|----------------------|-------------------|
| chr28     | 10427759 | 2 | 308 | G:0.857143           | A:0.142857        |
| chr28     | 10427979 | 2 | 312 | C:0.990385           | T:0.00961538      |
| chr28     | 10428209 | 2 | 294 | C:0.853741           | G:0.146259        |
| chr28     | 10428504 | 2 | 300 | A:0.866667           | G:0.133333        |
| chr28     | 10428822 | 2 | 250 | AT:0.7               | A:0.3             |
| chr28     | 10428863 | 2 | 284 | G:0.859155           | A:0.140845        |
| chr28     | 10429206 | 2 | 312 | C:0.875              | A:0.125           |
| chr28     | 10429290 | 2 | 308 | T:0.957792           | C:0.0422078       |
| chr28     | 10429814 | 2 | 308 | TC:0.876623          | T:0.123377        |
| chr28     | 10430037 | 2 | 296 | C:0.837838           | T:0.162162        |
| chr28     | 10430172 | 2 | 298 | C:0.865772           | T:0.134228        |
| chr28     | 10431042 | 2 | 286 | C:0.937063           | CT:0.0629371      |
| chr28     | 10431233 | 2 | 282 | G:0.858156           | A:0.141844        |
| chr28     | 10431502 | 2 | 296 | T:0.861486           | C:0.138514        |
| chr28     | 10432230 | 2 | 288 | G:0.989583           | T:0.0104167       |
| chr28     | 10432245 | 2 | 288 | G:0.878472           | A:0.121528        |
| chr28     | 10432448 | 2 | 302 | T:0.864238           | A:0.135762        |
| chr28     | 10432673 | 2 | 310 | C:0.729032           | T:0.270968        |
| chr28     | 10433001 | 2 | 210 | AGAGAGAGGAG:0.942857 | A:                |
| 0.0571429 |          |   |     |                      |                   |
| chr28     | 10433005 | 2 | 192 | AGAGGAG:0.786458     | A:0.213542        |
| chr28     | 10433007 | 2 | 198 | AGGAG:0.363636       | A:0.636364        |
| chr28     | 10434312 | 2 | 306 | A:0.879085           | G:0.120915        |
| chr28     | 10436203 | 2 | 302 | C:0.986755           | G:0.013245        |
| chr28     | 10436522 | 2 | 294 | G:0.982993           | A:0.0170068       |
| chr28     | 10437820 | 2 | 298 | C:0.996644           | G:0.0033557       |
| chr28     | 10438297 | 2 | 286 | G:0.63986            | T:0.36014         |
| chr28     | 10438805 | 2 | 314 | GCCAGGAC:0.980892    | G:                |
| 0.0191083 |          |   |     |                      |                   |
| chr28     | 10441394 | 2 | 300 | G:0.996667           | A:0.00333333      |
| chr28     | 10441797 | 2 | 312 | G:0.653846           | C:0.346154        |
| chr28     | 10441989 | 2 | 292 | G:0.869863           | T:0.130137        |
| chr28     | 10442087 | 2 | 298 | T:0.85906            | A:0.14094         |
| chr28     | 10442113 | 2 | 296 | A:0.834459           | AG:0.165541       |
| chr28     | 10442807 | 2 | 296 | A:0.97973            | C:0.0202703       |
| chr28     | 10443124 | 2 | 276 | C:0.985507           | CCT:0.0144928     |
| chr28     | 10443155 | 2 | 304 | TA:0.986842          | T:0.0131579       |
| chr28     | 10443174 | 2 | 304 | A:0.986842           | AAAATTT:0.0131579 |
| chr28     | 10443485 | 2 | 298 | A:0.986577           | T:0.0134228       |
| chr28     | 10443497 | 2 | 298 | TA:0.986577          | T:0.0134228       |
| chr28     | 10443670 | 2 | 302 | T:0.980132           | TA:0.0198675      |
| chr28     | 10443950 | 2 | 276 | T:0.945652           | TAA:0.0543478     |
| chr28     | 10443955 | 2 | 266 | A:0.43985            | AAT:0.56015       |
| chr28     | 10444272 | 2 | 306 | A:0.98366            | G:0.0163399       |
| chr28     | 10444470 | 2 | 308 | A:0.977273           | T:0.0227273       |
| chr28     | 10444772 | 2 | 304 | C:0.996711           | T:0.00328947      |
| chr28     | 10445301 | 2 | 288 | C:0.989583           | T:0.0104167       |
| chr28     | 10445305 | 2 | 290 | T:0.996552           | C:0.00344828      |
| chr28     | 10445326 | 2 | 298 | C:0.986577           | G:0.0134228       |
| chr28     | 10445406 | 2 | 294 | C:0.996599           | A:0.00340136      |
| chr28     | 10445550 | 2 | 308 | C:0.977273           | A:0.0227273       |
| chr28     | 10445640 | 2 | 298 | C:0.989933           | T:0.0100671       |
| chr28     | 10446428 | 2 | 298 | C:0.989933           | T:0.0100671       |
| chr28     | 10446700 | 2 | 298 | T:0.969799           | C:0.0302013       |

|       |          |   |     |                     |                  |
|-------|----------|---|-----|---------------------|------------------|
| chr28 | 10446807 | 2 | 302 | T:0.980132          | C:0.0198675      |
| chr28 | 10446829 | 2 | 294 | G:0.993197          | A:0.00680272     |
| chr28 | 10446843 | 2 | 296 | G:0.986486          | A:0.0135135      |
| chr28 | 10447462 | 2 | 308 | T:0.967532          | C:0.0324675      |
| chr28 | 10447683 | 2 | 292 | C:0.982877          | T:0.0171233      |
| chr28 | 10447739 | 2 | 278 | G:0.780576          | GT:0.219424      |
| chr28 | 10447794 | 2 | 266 | C:0.815789          | CAG:0.184211     |
| chr28 | 10448124 | 2 | 292 | A:0.976027          | G:0.0239726      |
| chr28 | 10448364 | 2 | 302 | A:0.983444          | G:0.0165563      |
| chr28 | 10449013 | 2 | 312 | G:0.987179          | A:0.0128205      |
| chr28 | 10449165 | 2 | 304 | T:0.986842          | C:0.0131579      |
| chr28 | 10449174 | 2 | 304 | G:0.986842          | A:0.0131579      |
| chr28 | 10449975 | 2 | 300 | C:0.983333          | T:0.0166667      |
| chr28 | 10449977 | 2 | 300 | A:0.983333          | C:0.0166667      |
| chr28 | 10450144 | 2 | 298 | A:0.986577          | T:0.0134228      |
| chr28 | 10450153 | 3 | 300 | TA:0.88 T:0.0133333 | TAA:<br>0.106667 |
| chr28 | 10450155 | 2 | 298 | A:0.986577          | T:0.0134228      |
| chr28 | 10451487 | 2 | 316 | TCA:0.800633        | T:0.199367       |
| chr28 | 10451760 | 2 | 300 | C:0.756667          | T:0.243333       |
| chr28 | 10453124 | 2 | 304 | G:0.720395          | T:0.279605       |
| chr28 | 10453220 | 2 | 296 | C:0.273649          | T:0.726351       |
| chr28 | 10453221 | 2 | 296 | T:0.273649          | G:0.726351       |
| chr28 | 10453340 | 2 | 300 | G:0.25 A:0.75       |                  |
| chr28 | 10453397 | 2 | 296 | G:0.996622          | A:0.00337838     |
| chr28 | 10453654 | 2 | 296 | T:0.253378          | C:0.746622       |
| chr28 | 10454031 | 2 | 314 | C:0.235669          | T:0.764331       |
| chr28 | 10454118 | 2 | 298 | G:0.993289          | A:0.00671141     |
| chr28 | 10455483 | 2 | 300 | G:0.99 A:0.01       |                  |
| chr28 | 10455514 | 2 | 290 | T:0.989655          | C:0.0103448      |
| chr28 | 10456454 | 2 | 302 | T:0.00331126        | C:0.996689       |
| chr28 | 10456632 | 2 | 298 | C:0.989933          | T:0.0100671      |
| chr28 | 10457104 | 2 | 304 | AT:0.0394737        | A:0.960526       |
| chr28 | 10457244 | 2 | 308 | A:0.993506          | T:0.00649351     |
| chr28 | 10457252 | 2 | 308 | C:0.993506          | T:0.00649351     |
| chr28 | 10457765 | 2 | 300 | T:0.873333          | G:0.126667       |
| chr28 | 10458109 | 2 | 296 | G:0.962838          | A:0.0371622      |
| chr28 | 10458290 | 2 | 284 | G:0.00352113        | A:0.996479       |
| chr28 | 10458604 | 2 | 288 | A:0.0104167         | G:0.989583       |
| chr28 | 10458825 | 2 | 302 | A:0.00993377        | C:0.990066       |
| chr28 | 10459013 | 2 | 308 | G:0.993506          | A:0.00649351     |
| chr28 | 10460830 | 2 | 304 | T:0.986842          | C:0.0131579      |
| chr28 | 10460841 | 2 | 308 | A:0.99026           | G:0.00974026     |
| chr28 | 10461036 | 2 | 298 | A:0.996644          | G:0.0033557      |
| chr28 | 10461926 | 2 | 312 | A:0.990385          | G:0.00961538     |
| chr28 | 10462118 | 2 | 302 | A:0.00993377        | C:0.990066       |
| chr28 | 10462141 | 2 | 310 | C:0.993548          | T:0.00645161     |
| chr28 | 10462648 | 2 | 294 | C:0.993197          | T:0.00680272     |
| chr28 | 10462900 | 2 | 300 | T:0.986667          | C:0.0133333      |
| chr28 | 10463060 | 2 | 288 | A:0.982639          | G:0.0173611      |
| chr28 | 10463186 | 2 | 290 | T:0.00689655        | C:0.993103       |
| chr28 | 10463187 | 2 | 290 | G:0.00689655        | A:0.993103       |
| chr28 | 10463400 | 2 | 296 | AT:0.962838         | A:0.0371622      |
| chr28 | 10463475 | 2 | 308 | CGGCTTT:0.012987    | C:0.987013       |

|       |          |   |     |                         |              |
|-------|----------|---|-----|-------------------------|--------------|
| chr28 | 10463618 | 2 | 290 | C:0.00689655            | T:0.993103   |
| chr28 | 10463649 | 2 | 300 | A:0.00666667            | G:0.993333   |
| chr28 | 10463654 | 2 | 300 | A:0.00666667            | C:0.993333   |
| chr28 | 10464467 | 2 | 286 | CT:0.00699301           | C:0.993007   |
| chr28 | 10465467 | 2 | 296 | G:0.0439189             | A:0.956081   |
| chr28 | 10466178 | 2 | 286 | A:0 T:1                 |              |
| chr28 | 10466668 | 2 | 302 | G:0.00993377            | A:0.990066   |
| chr28 | 10467048 | 2 | 264 | C:0.848485              | CT:0.151515  |
| chr28 | 10468099 | 2 | 300 | C:0.01 T:0.99           |              |
| chr28 | 10468140 | 2 | 298 | C:0.0100671             | T:0.989933   |
| chr28 | 10468190 | 2 | 292 | A:0.010274              | T:0.989726   |
| chr28 | 10468601 | 2 | 286 | A:0.0104895             | C:0.98951    |
| chr28 | 10468818 | 2 | 298 | C:0.989933              | T:0.0100671  |
| chr28 | 10469513 | 2 | 300 | GT:0.993333             | G:0.00666667 |
| chr28 | 10469933 | 2 | 308 | T:0.99026               | C:0.00974026 |
| chr28 | 10470363 | 2 | 302 | G:0.960265              | A:0.0397351  |
| chr28 | 10470454 | 2 | 300 | C:0.993333              | T:0.00666667 |
| chr28 | 10471019 | 2 | 306 | T:0.986928              | C:0.0130719  |
| chr28 | 10471128 | 2 | 304 | A:0.983553              | G:0.0164474  |
| chr28 | 10471268 | 2 | 304 | G:0.00657895            | T:0.993421   |
| chr28 | 10471749 | 2 | 308 | G:0.993506              | C:0.00649351 |
| chr28 | 10472372 | 2 | 288 | G:0.0173611             | C:0.982639   |
| chr28 | 10472382 | 2 | 288 | C:0.0173611             | T:0.982639   |
| chr28 | 10472405 | 2 | 284 | A:0.0105634             | G:0.989437   |
| chr28 | 10472496 | 2 | 302 | T:0.00662252            | C:0.993377   |
| chr28 | 10472721 | 2 | 306 | G:0.954248              | A:0.0457516  |
| chr28 | 10473124 | 2 | 302 | C:0.966887              | T:0.0331126  |
| chr28 | 10473220 | 2 | 300 | C:0.99 A:0.01           |              |
| chr28 | 10473702 | 2 | 304 | A:0.940789              | G:0.0592105  |
| chr28 | 10474306 | 2 | 304 | G:0.957237              | T:0.0427632  |
| chr28 | 10474709 | 2 | 308 | C:0.00974026            | G:0.99026    |
| chr28 | 10474800 | 2 | 306 | A:0.00653595            | G:0.993464   |
| chr28 | 10475240 | 2 | 306 | CAAAT:0.0653595         | C:0.934641   |
| chr28 | 10476277 | 2 | 292 | A:0.0205479             | AT:0.979452  |
| chr28 | 10476460 | 2 | 298 | CAG:0.885906            | C:0.114094   |
| chr28 | 10477100 | 2 | 302 | G:0.00662252            | C:0.993377   |
| chr28 | 10477151 | 2 | 306 | G:0.00653595            | A:0.993464   |
| chr28 | 10477238 | 2 | 304 | T:0.953947              | A:0.0460526  |
| chr28 | 10477792 | 2 | 306 | TG:0.00653595           | T:0.993464   |
| chr28 | 10477931 | 2 | 296 | G:0.00675676            | A:0.993243   |
| chr28 | 10478437 | 2 | 286 | AT:0.0034965            | A:0.996503   |
| chr28 | 10478679 | 2 | 274 | G:0.0693431             | A:0.930657   |
| chr28 | 10478862 | 2 | 294 | A:0.00680272            | G:0.993197   |
| chr28 | 10479039 | 2 | 306 | C:0.993464              | T:0.00653595 |
| chr28 | 10479052 | 2 | 306 | T:0.993464              | C:0.00653595 |
| chr28 | 10479655 | 2 | 308 | C:0.993506              | A:0.00649351 |
| chr28 | 10479729 | 2 | 314 | TACATACATACAC:0.0573248 | T:           |
|       | 0.942675 |   |     |                         |              |
| chr28 | 10480199 | 2 | 296 | T:0.878378              | A:0.121622   |
| chr28 | 10480614 | 2 | 294 | C:0.945578              | A:0.0544218  |
| chr28 | 10480617 | 2 | 296 | A:0.959459              | T:0.0405405  |
| chr28 | 10480627 | 2 | 300 | C:0.93 T:0.07           |              |
| chr28 | 10480657 | 2 | 298 | A:0.916107              | C:0.0838926  |
| chr28 | 10480753 | 2 | 302 | CAAA:0.950331           | C:0.0496689  |

|       |             |     |                              |                |
|-------|-------------|-----|------------------------------|----------------|
| chr28 | 10480930 2  | 304 | G:0.0526316                  | A:0.947368     |
| chr28 | 10481065 2  | 300 | T:0.906667                   | C:0.0933333    |
| chr28 | 10481291 2  | 296 | G:0.983108                   | A:0.0168919    |
| chr28 | 10481321 2  | 300 | G:0.986667                   | A:0.0133333    |
| chr28 | 10481705 2  | 302 | G:0.937086                   | A:0.0629139    |
| chr28 | 10481790 2  | 300 | G:0.946667                   | A:0.0533333    |
| chr28 | 10482555 2  | 284 | T:0.957746                   | A:0.0422535    |
| chr28 | 10482662 2  | 306 | A:0.96732                    | G:0.0326797    |
| chr28 | 10482683 2  | 308 | C:0.961039                   | CAGTT:0.038961 |
| chr28 | 10482915 2  | 306 | A:0.954248                   | C:0.0457516    |
| chr28 | 10483086 2  | 284 | A:0.954225                   | G:0.0457746    |
| chr28 | 10483165 2  | 310 | G:0.967742                   | A:0.0322581    |
| chr28 | 10484059 2  | 292 | A:0.0410959                  | T:0.958904     |
| chr28 | 10484244 2  | 266 | C:0.913534                   | G:0.0864662    |
| chr28 | 10484531 2  | 314 | AGAGGATGGATAGGTGAAG:0.920382 |                |
|       | A:0.0796178 |     |                              |                |
| chr28 | 10484723 2  | 298 | A:0.949664                   | G:0.0503356    |
| chr28 | 10484729 2  | 298 | C:0.949664                   | T:0.0503356    |
| chr28 | 10484756 2  | 296 | A:0.945946                   | AC:0.0540541   |
| chr28 | 10484941 2  | 298 | A:0.956376                   | G:0.0436242    |
| chr28 | 10485235 2  | 290 | C:0.996552                   | T:0.00344828   |
| chr28 | 10485354 2  | 302 | G:0.0596026                  | A:0.940397     |
| chr28 | 10485410 2  | 298 | G:0.989933                   | A:0.0100671    |
| chr28 | 10485591 2  | 294 | A:0.945578                   | G:0.0544218    |
| chr28 | 10485726 2  | 290 | T:0.962069                   | C:0.037931     |
| chr28 | 10485753 2  | 286 | T:0.909091                   | C:0.0909091    |
| chr28 | 10486174 2  | 306 | A:0.0980392                  | G:0.901961     |
| chr28 | 10486240 2  | 314 | C:0.0700637                  | CTAAA:0.929936 |
| chr28 | 10486311 2  | 304 | T:0.914474                   | A:0.0855263    |
| chr28 | 10486438 2  | 296 | C:0.114865                   | A:0.885135     |
| chr28 | 10486495 2  | 310 | C:0.0612903                  | G:0.93871      |
| chr28 | 10487737 2  | 294 | A:0.047619                   | G:0.952381     |
| chr28 | 10487775 2  | 300 | G:0.103333                   | A:0.896667     |
| chr28 | 10488156 2  | 308 | T:0.957792                   | C:0.0422078    |
| chr28 | 10488182 2  | 300 | T:0.993333                   | C:0.00666667   |
| chr28 | 10488230 2  | 302 | G:0.0529801                  | A:0.94702      |
| chr28 | 10488231 2  | 302 | T:0.0529801                  | C:0.94702      |
| chr28 | 10488467 2  | 300 | C:0.966667                   | CT:0.0333333   |
| chr28 | 10488606 2  | 308 | T:0.935065                   | C:0.0649351    |
| chr28 | 10488873 2  | 302 | AC:0.960265                  | A:0.0397351    |
| chr28 | 10488986 2  | 306 | G:0.964052                   | A:0.0359477    |
| chr28 | 10489224 2  | 288 | A:0.913194                   | G:0.0868056    |
| chr28 | 10489255 2  | 292 | A:0.0993151                  | C:0.900685     |
| chr28 | 10489259 2  | 292 | A:0.0993151                  | G:0.900685     |
| chr28 | 10489306 2  | 300 | C:0.103333                   | CCA:0.896667   |
| chr28 | 10489446 2  | 304 | CA:0.894737                  | C:0.105263     |
| chr28 | 10489453 2  | 304 | G:0.894737                   | C:0.105263     |
| chr28 | 10489887 2  | 310 | G:0.0516129                  | T:0.948387     |
| chr28 | 10489978 2  | 302 | T:0.0529801                  | G:0.94702      |
| chr28 | 10490118 2  | 308 | T:0.0584416                  | C:0.941558     |
| chr28 | 10490313 2  | 310 | A:0.993548                   | T:0.00645161   |
| chr28 | 10490316 2  | 306 | G:0.0457516                  | C:0.954248     |
| chr28 | 10490690 2  | 292 | G:0.955479                   | A:0.0445205    |
| chr28 | 10490875 2  | 302 | G:0.0430464                  | A:0.956954     |

|                      |            |     |                              |              |
|----------------------|------------|-----|------------------------------|--------------|
| chr28                | 10490928 2 | 300 | GAC:0.923333                 | G:0.0766667  |
| chr28                | 10490959 2 | 304 | G:0.125 A:0.875              |              |
| chr28                | 10490970 2 | 310 | T:0.929032                   | A:0.0709677  |
| chr28                | 10491278 2 | 312 | G:0.0512821                  | A:0.948718   |
| chr28                | 10491324 2 | 310 | C:0.0419355                  | T:0.958065   |
| chr28                | 10491898 2 | 304 | T:0.930921                   | C:0.0690789  |
| chr28                | 10492084 2 | 278 | A:0.0467626                  | G:0.953237   |
| chr28                | 10492096 2 | 284 | G:0.954225                   | A:0.0457746  |
| chr28                | 10492234 2 | 296 | T:0.945946                   | A:0.0540541  |
| chr28                | 10492251 2 | 296 | A:0.945946                   | T:0.0540541  |
| chr28                | 10492788 2 | 306 | C:0.993464                   | T:0.00653595 |
| chr28                | 10493120 2 | 300 | C:0.0533333                  | T:0.946667   |
| chr28                | 10493336 2 | 306 | T:0.993464                   | C:0.00653595 |
| chr28                | 10493467 2 | 310 | G:0.958065                   | C:0.0419355  |
| chr28                | 10493542 2 | 300 | G:0.953333                   | GC:0.0466667 |
| chr28                | 10493971 3 | 294 | CTT:0.159864                 | C:0.115646   |
| CT:0.72449           |            |     |                              |              |
| chr28                | 10494096 2 | 290 | G:0.927586                   | C:0.0724138  |
| chr28                | 10494328 2 | 304 | CA:0.993421                  | C:0.00657895 |
| chr28                | 10494341 2 | 302 | G:0.874172                   | A:0.125828   |
| chr28                | 10494349 2 | 302 | A:0.0463576                  | G:0.953642   |
| chr28                | 10494830 2 | 296 | T:0.0506757                  | C:0.949324   |
| chr28                | 10494838 2 | 296 | T:0.0506757                  | C:0.949324   |
| chr28                | 10494914 2 | 276 | T:0.0652174                  | C:0.934783   |
| chr28                | 10495072 2 | 300 | C:0.92 T:0.08                |              |
| chr28                | 10495147 2 | 282 | C:0.996454                   | T:0.0035461  |
| chr28                | 10495571 2 | 302 | G:0.996689                   | T:0.00331126 |
| chr28                | 10495874 2 | 304 | C:0.907895                   | T:0.0921053  |
| chr28                | 10495926 2 | 300 | A:0.906667                   | G:0.0933333  |
| chr28                | 10496120 2 | 316 | TAAGAAGAGGAAAAGAAAAAAAAAAAA: |              |
| 0.901899 T:0.0981013 |            |     |                              |              |
| chr28                | 10496286 2 | 296 | A:0.0608108                  | G:0.939189   |
| chr28                | 10496348 2 | 300 | G:0.14 T:0.86                |              |
| chr28                | 10496390 2 | 304 | A:0.914474                   | G:0.0855263  |
| chr28                | 10496416 2 | 308 | A:0.905844                   | G:0.0941558  |
| chr28                | 10496501 2 | 302 | T:0.927152                   | C:0.0728477  |
| chr28                | 10496502 2 | 302 | G:0.927152                   | A:0.0728477  |
| chr28                | 10496557 2 | 282 | G:0.925532                   | A:0.0744681  |
| chr28                | 10496630 2 | 292 | C:0.934932                   | T:0.0650685  |
| chr28                | 10496764 2 | 302 | G:0.238411                   | A:0.761589   |
| chr28                | 10496770 2 | 302 | G:0.910596                   | C:0.089404   |
| chr28                | 10496875 2 | 296 | A:0.0405405                  | C:0.959459   |
| chr28                | 10497044 2 | 296 | T:0.918919                   | C:0.0810811  |
| chr28                | 10497105 2 | 300 | AAGG:0.13                    | A:0.87       |
| chr28                | 10497318 2 | 220 | A:0.181818                   | G:0.818182   |
| chr28                | 10497383 2 | 232 | C:0.189655                   | A:0.810345   |
| chr28                | 10497468 2 | 278 | G:0.881295                   | A:0.118705   |
| chr28                | 10497554 2 | 278 | G:0.899281                   | A:0.100719   |
| chr28                | 10497558 2 | 278 | C:0.899281                   | T:0.100719   |
| chr28                | 10497565 2 | 278 | C:0.899281                   | A:0.100719   |
| chr28                | 10497589 2 | 292 | A:0 C:1                      |              |
| chr28                | 10497592 2 | 292 | G:0 C:1                      |              |
| chr28                | 10497660 2 | 304 | G:0.914474                   | A:0.0855263  |
| chr28                | 10497693 2 | 300 | A:0 AC:1                     |              |



|               |               |                 |                                   |              |
|---------------|---------------|-----------------|-----------------------------------|--------------|
| chr28         | 10497725 2    | 306             | A:0.859477                        | C:0.140523   |
| chr28         | 10497773 2    | 296             | A:0.875 G:0.125                   |              |
| chr28         | 10498021 2    | 294             | T:0.112245                        | C:0.887755   |
| chr28         | 10498078 2    | 298             | A:0.130872                        | G:0.869128   |
| chr28         | 10498147 4    | 302             | GCACACA:0.0860927                 | G:           |
| 0.788079      | GCA:0.0496689 | GCACA:0.0761589 |                                   |              |
| chr28         | 10498448 2    | 302             | G:0.92053                         | A:0.0794702  |
| chr28         | 10498511 2    | 302             | T:0.943709                        | G:0.0562914  |
| chr28         | 10498541 2    | 316             | AGGTCCTGTCTGGTAACAGGACCT:0.882911 |              |
| A:0.117089    |               |                 |                                   |              |
| chr28         | 10498710 2    | 316             | C:0.920886                        | T:0.0791139  |
| chr28         | 10498723 2    | 316             | T:0.920886                        | C:0.0791139  |
| chr28         | 10499073 2    | 302             | C:0.0463576                       | CA:0.953642  |
| chr28         | 10499137 2    | 292             | C:0.952055                        | T:0.0479452  |
| chr28         | 10499219 2    | 286             | TC:0.944056                       | T:0.0559441  |
| chr28         | 10499282 2    | 286             | TA:0.678322                       | T:0.321678   |
| chr28         | 10499359 2    | 304             | G:0.901316                        | C:0.0986842  |
| chr28         | 10499416 2    | 296             | A:0.932432                        | T:0.0675676  |
| chr28         | 10499501 2    | 312             | CA:0.932692                       | C:0.0673077  |
| chr28         | 10499571 2    | 306             | G:0.928105                        | A:0.0718954  |
| chr28         | 10499708 2    | 300             | T:0.923333                        | C:0.0766667  |
| chr28         | 10499713 2    | 302             | T:0.930464                        | C:0.0695364  |
| chr28         | 10499878 2    | 294             | A:0.037415                        | G:0.962585   |
| chr28         | 10500007 2    | 294             | T:0.921769                        | C:0.0782313  |
| chr28         | 10500100 3    | 302             | T:0.903974                        | TA:0.0331126 |
| TAA:0.0629139 |               |                 |                                   |              |
| chr28         | 10500406 2    | 302             | C:0.927152                        | T:0.0728477  |
| chr28         | 10500445 2    | 302             | C:0.92053                         | T:0.0794702  |
| chr28         | 10500483 2    | 296             | G:0.929054                        | A:0.0709459  |
| chr28         | 10500524 2    | 296             | G:0.925676                        | A:0.0743243  |
| chr28         | 10500529 2    | 296             | G:0.925676                        | A:0.0743243  |
| chr28         | 10500978 2    | 260             | A:0.880769                        | G:0.119231   |
| chr28         | 10501240 2    | 296             | A:0.918919                        | G:0.0810811  |
| chr28         | 10501364 2    | 290             | G:0.913793                        | C:0.0862069  |
| chr28         | 10501382 2    | 294             | A:0.914966                        | G:0.085034   |
| chr28         | 10501385 2    | 294             | A:0.914966                        | G:0.085034   |
| chr28         | 10501432 2    | 298             | T:0.909396                        | C:0.090604   |
| chr28         | 10501443 2    | 304             | A:0.805921                        | G:0.194079   |
| chr28         | 10501454 2    | 306             | G:0.934641                        | A:0.0653595  |
| chr28         | 10501493 2    | 306             | G:0.977124                        | C:0.0228758  |
| chr28         | 10501534 2    | 302             | C:0.927152                        | T:0.0728477  |
| chr28         | 10501548 2    | 300             | C:0.953333                        | T:0.0466667  |
| chr28         | 10501639 2    | 306             | G:0.901961                        | A:0.0980392  |
| chr28         | 10501640 2    | 306             | T:0.901961                        | G:0.0980392  |
| chr28         | 10501691 2    | 314             | A:0.898089                        | G:0.101911   |
| chr28         | 10501816 2    | 306             | T:0.888889                        | C:0.111111   |
| chr28         | 10501919 2    | 296             | T:0.881757                        | G:0.118243   |
| chr28         | 10502181 2    | 302             | A:0.940397                        | C:0.0596026  |
| chr28         | 10502226 2    | 278             | A:0.910072                        | G:0.0899281  |
| chr28         | 10502518 2    | 290             | A:0.786207                        | G:0.213793   |
| chr28         | 10502522 2    | 288             | G:0.940972                        | A:0.0590278  |
| chr28         | 10502601 2    | 306             | T:0.95098                         | C:0.0490196  |
| chr28         | 10502730 2    | 302             | C:0.0430464                       | G:0.956954   |
| chr28         | 10502893 2    | 294             | T:0.918367                        | C:0.0816327  |

|             |          |   |     |                   |                   |
|-------------|----------|---|-----|-------------------|-------------------|
| chr28       | 10503172 | 2 | 294 | G:0.986395        | A:0.0136054       |
| chr28       | 10503199 | 2 | 302 | C:0.983444        | T:0.0165563       |
| chr28       | 10503801 | 2 | 262 | CTTTTCTT:0.255725 | C:                |
| 0.744275    |          |   |     |                   |                   |
| chr28       | 10503808 | 2 | 302 | T:0.990066        | TTTTTC:0.00993377 |
| chr28       | 10503843 | 2 | 276 | CTTT:0.98913      | C:0.0108696       |
| chr28       | 10504846 | 2 | 288 | G:0.986111        | T:0.0138889       |
| chr28       | 10505578 | 2 | 292 | TGA:0.979452      | T:0.0205479       |
| chr28       | 10505851 | 2 | 282 | CT:0.858156       | C:0.141844        |
| chr28       | 10506237 | 2 | 292 | A:0.979452        | C:0.0205479       |
| chr28       | 10506576 | 2 | 314 | G:0.984076        | A:0.0159236       |
| chr28       | 10506774 | 2 | 304 | T:0.118421        | C:0.881579        |
| chr28       | 10506846 | 2 | 308 | T:0.974026        | C:0.025974        |
| chr28       | 10506862 | 2 | 308 | C:0.974026        | CCTTG:0.025974    |
| chr28       | 10506923 | 2 | 292 | A:0.986301        | G:0.0136986       |
| chr28       | 10507097 | 2 | 282 | T:0.975177        | C:0.0248227       |
| chr28       | 10507576 | 2 | 282 | C:0.975177        | T:0.0248227       |
| chr28       | 10507885 | 2 | 300 | C:0.99            | G:0.01            |
| chr28       | 10507946 | 2 | 256 | T:0.976562        | C:0.0234375       |
| chr28       | 10507957 | 2 | 172 | C:0.203488        | CT:0.796512       |
| chr28       | 10508091 | 2 | 290 | C:0.975862        | T:0.0241379       |
| chr28       | 10508159 | 3 | 278 | TAA:0.705036      | T:0.0971223       |
| TA:0.197842 |          |   |     |                   |                   |
| chr28       | 10508191 | 2 | 244 | C:0.877049        | CT:0.122951       |
| chr28       | 10508347 | 2 | 300 | A:0.886667        | G:0.113333        |
| chr28       | 10508357 | 2 | 300 | T:0.886667        | C:0.113333        |
| chr28       | 10508629 | 2 | 296 | C:0.925676        | T:0.0743243       |
| chr28       | 10509066 | 2 | 304 | G:0.105263        | T:0.894737        |
| chr28       | 10511315 | 2 | 312 | T:0.108974        | C:0.891026        |
| chr28       | 10512059 | 2 | 296 | G:0.885135        | A:0.114865        |
| chr28       | 10512115 | 2 | 314 | T:0.904459        | TTCTCTCTC:        |
| 0.0955414   |          |   |     |                   |                   |
| chr28       | 10512616 | 2 | 308 | G:0.737013        | GT:0.262987       |
| chr28       | 10512620 | 2 | 310 | T:0.964516        | G:0.0354839       |
| chr28       | 10512669 | 2 | 302 | T:0.92053         | C:0.0794702       |
| chr28       | 10512749 | 2 | 302 | T:0.900662        | C:0.0993377       |
| chr28       | 10513085 | 2 | 298 | A:0.124161        | G:0.875839        |
| chr28       | 10513322 | 2 | 304 | C:0.878289        | T:0.121711        |
| chr28       | 10513530 | 2 | 304 | G:0.917763        | T:0.0822368       |
| chr28       | 10514199 | 2 | 298 | C:0.0838926       | T:0.916107        |
| chr28       | 10514412 | 2 | 296 | A:0.0777027       | G:0.922297        |
| chr28       | 10514583 | 2 | 306 | C:0.0980392       | T:0.901961        |
| chr28       | 10515232 | 2 | 298 | A:0.114094        | G:0.885906        |
| chr28       | 10515282 | 2 | 298 | T:0.104027        | A:0.895973        |
| chr28       | 10515351 | 3 | 284 | A:0.90493         | T:0.0387324       |
| AT:0.056338 |          |   |     |                   |                   |
| chr28       | 10515445 | 2 | 298 | G:0.979866        | A:0.0201342       |
| chr28       | 10516428 | 2 | 302 | T:0.923841        | G:0.0761589       |
| chr28       | 10516548 | 2 | 292 | T:0.917808        | C:0.0821918       |
| chr28       | 10517160 | 2 | 296 | A:0.0506757       | G:0.949324        |
| chr28       | 10517313 | 2 | 306 | T:0.147059        | C:0.852941        |
| chr28       | 10517345 | 2 | 306 | A:0.147059        | G:0.852941        |
| chr28       | 10517435 | 2 | 180 | C:0.3             | T:0.7             |
| chr28       | 10517439 | 2 | 180 | T:0.3             | TCC:0.7           |

|              |          |   |                  |                      |               |
|--------------|----------|---|------------------|----------------------|---------------|
| chr28        | 10517453 | 2 | 264              | T:0.92803            | TCA:0.0719697 |
| chr28        | 10517690 | 2 | 300              | G:0.216667           | A:0.783333    |
| chr28        | 10517787 | 2 | 300              | C:0.183333           | T:0.816667    |
| chr28        | 10517820 | 2 | 290              | C:0.224138           | T:0.775862    |
| chr28        | 10518033 | 2 | 298              | T:0.949664           | C:0.0503356   |
| chr28        | 10518080 | 2 | 294              | G:0.962585           | GT:0.037415   |
| chr28        | 10518081 | 3 | 298              | G:0.174497           | T:0.0369128   |
| GTT:0.788591 |          |   |                  |                      |               |
| chr28        | 10518269 | 2 | 282              | G:0.968085           | A:0.0319149   |
| chr28        | 10518280 | 2 | 276              | C:0.974638           | G:0.0253623   |
| chr28        | 10518281 | 2 | 280              | C:0.910714           | T:0.0892857   |
| chr28        | 10518374 | 2 | 296              | G:0.952703           | C:0.0472973   |
| chr28        | 10518411 | 2 | 272              | G:0.959559           | C:0.0404412   |
| chr28        | 10518497 | 2 | 232              | CG:0.866379          | C:0.133621    |
| chr28        | 10519342 | 2 | 154              | AG:0                 | A:1           |
| chr28        | 10519353 | 2 | 146              | TC:0                 | T:1           |
| chr28        | 10519366 | 2 | 132              | TC:0                 | T:1           |
| chr28        | 10519388 | 2 | 132              | CT:0                 | C:1           |
| chr28        | 10519430 | 2 | 134              | CT:0                 | C:1           |
| chr28        | 10519534 | 2 | 182              | A:0.28022            | G:0.71978     |
| chr28        | 10519546 | 2 | 182              | A:0.28022            | ACC:0.71978   |
| chr28        | 10519548 | 2 | 182              | A:0.28022            | G:0.71978     |
| chr28        | 10519654 | 2 | 252              | G:0.920635           | C:0.0793651   |
| chr28        | 10519675 | 2 | 254              | G:0.956693           | C:0.0433071   |
| chr28        | 10519739 | 2 | 232              | T:0.599138           | C:0.400862    |
| chr28        | 10519864 | 2 | 228              | G:0.627193           | A:0.372807    |
| chr28        | 10520051 | 2 | 130              | AG:0.646154          | A:0.353846    |
| chr28        | 10520150 | 2 | 286              | A:0.975524           | G:0.0244755   |
| chr28        | 10520305 | 2 | 268              | C:0.973881           | G:0.0261194   |
| chr28        | 10520332 | 2 | 288              | AG:0.6875            | A:0.3125      |
| chr28        | 10520668 | 2 | 302              | G:0.698675           | A:0.301325    |
| chr28        | 10520890 | 2 | 292              | C:0.979452           | CG:0.0205479  |
| chr28        | 10520935 | 2 | 294              | C:0.72449            | T:0.27551     |
| chr28        | 10521102 | 2 | 308              | A:0.633117           | G:0.366883    |
| chr28        | 10521620 | 2 | 254              | C:0.948819           | G:0.0511811   |
| chr28        | 10522208 | 2 | 290              | C:0.658621           | A:0.341379    |
| chr28        | 10522366 | 2 | 308              | C:0.948052           | T:0.0519481   |
| chr28        | 10522633 | 2 | 312              | A:0.657051           | G:0.342949    |
| chr28        | 10522956 | 2 | 284              | A:0.661972           | AT:0.338028   |
| chr28        | 10522983 | 2 | 290              | T:0.986207           | G:0.0137931   |
| chr28        | 10523071 | 2 | 286              | A:0.65035            | G:0.34965     |
| chr28        | 10523174 | 2 | 292              | G:0.965753           | A:0.0342466   |
| chr28        | 10523305 | 2 | 292              | A:0.945205           | G:0.0547945   |
| chr28        | 10523777 | 2 | 302              | A:0.665563           | G:0.334437    |
| chr28        | 10523822 | 2 | 300              | G:0.976667           | A:0.0233333   |
| chr28        | 10524256 | 2 | 310              | A:0.7                | G:0.3         |
| chr28        | 10524518 | 2 | 308              | T:0.720779           | G:0.279221    |
| chr28        | 10524932 | 2 | 300              | T:0.696667           | C:0.303333    |
| chr28        | 10525567 | 2 | 304              | G:0.756579           | A:0.243421    |
| chr28        | 10525601 | 2 | 304              | T:0.934211           | A:0.0657895   |
| chr28        | 10525681 | 2 | 306              | C:0.673203           | T:0.326797    |
| chr28        | 10525713 | 2 | 290              | A:0.975862           | AT:0.0241379  |
| chr28        | 10525755 | 4 | 316              | CAGAGAGAGAG:0.120253 | C:            |
| 0.0886076    |          |   | CAGAGAG:0.329114 | CAGAGAGAG:0.462025   |               |

|       |                             |     |                        |                |
|-------|-----------------------------|-----|------------------------|----------------|
| chr28 | 10525997 2                  | 302 | A:0.682119             | C:0.317881     |
| chr28 | 10526376 5                  | 318 | GAATAAATA:0.566038     | G:             |
|       | 0.179245                    |     | GAATAAATAAATA:0.154088 |                |
|       | GAATAAATAAATAAATA:0.0440252 |     |                        |                |
| chr28 | 10526519 2                  | 290 | A:0.682759             | G:0.317241     |
| chr28 | 10527997 2                  | 312 | G:0.733974             | T:0.266026     |
| chr28 | 10528186 2                  | 298 | GA:0.949664            | G:0.0503356    |
| chr28 | 10528530 2                  | 302 | A:0.983444             | AT:0.0165563   |
| chr28 | 10528700 2                  | 282 | G:0.737589             | C:0.262411     |
| chr28 | 10528814 2                  | 308 | C:0.746753             | T:0.253247     |
| chr28 | 10528977 2                  | 316 | C:0.974684             | G:0.0253165    |
| chr28 | 10529218 2                  | 314 | T:0.671975             | C:0.328025     |
| chr28 | 10529380 2                  | 300 | C:0.673333             | G:0.326667     |
| chr28 | 10529384 2                  | 302 | C:0.754967             | A:0.245033     |
| chr28 | 10529489 3                  | 288 | TA:0.576389            | T:0.302083     |
|       | TAA:0.121528                |     |                        |                |
| chr28 | 10529526 2                  | 304 | C:0.694079             | CTCTG:0.305921 |
| chr28 | 10530570 2                  | 302 | G:0.983444             | A:0.0165563    |
| chr28 | 10531210 2                  | 308 | A:0.980519             | G:0.0194805    |
| chr28 | 10531444 2                  | 300 | TG:0.98 T:0.02         |                |
| chr28 | 10531787 2                  | 304 | CA:0.950658            | C:0.0493421    |
| chr28 | 10531942 2                  | 304 | G:0.947368             | A:0.0526316    |
| chr28 | 10532071 2                  | 302 | G:0.748344             | A:0.251656     |
| chr28 | 10532897 2                  | 220 | C:0.7 T:0.3            |                |
| chr28 | 10533054 2                  | 270 | G:0.7 C:0.3            |                |
| chr28 | 10533354 2                  | 308 | TAGAGG:0.977273        | T:0.0227273    |
| chr28 | 10533459 2                  | 302 | G:0.718543             | T:0.281457     |
| chr28 | 10533652 2                  | 288 | G:0.982639             | A:0.0173611    |
| chr28 | 10533958 2                  | 290 | C:0.962069             | T:0.037931     |
| chr28 | 10534843 2                  | 302 | G:0.953642             | A:0.0463576    |
| chr28 | 10534893 2                  | 306 | T:0.960784             | C:0.0392157    |
| chr28 | 10535021 3                  | 306 | GA:0.843137            | G:0.0849673    |
|       | GAA:0.0718954               |     |                        |                |
| chr28 | 10535315 2                  | 312 | AC:0.983974            | A:0.0160256    |
| chr28 | 10535331 2                  | 308 | G:0.983766             | T:0.0162338    |
| chr28 | 10535811 2                  | 298 | C:0.728188             | T:0.271812     |
| chr28 | 10535898 2                  | 306 | T:0.928105             | G:0.0718954    |
| chr28 | 10535958 2                  | 304 | G:0.934211             | A:0.0657895    |
| chr28 | 10536054 2                  | 300 | C:0.93 G:0.07          |                |
| chr28 | 10536332 2                  | 298 | C:0.936242             | CAG:0.0637584  |
| chr28 | 10536420 2                  | 306 | A:0.650327             | G:0.349673     |
| chr28 | 10536976 2                  | 308 | A:0.977273             | G:0.0227273    |
| chr28 | 10537452 2                  | 312 | C:0.676282             | CTGAG:0.323718 |
| chr28 | 10537507 2                  | 296 | T:0.939189             | TTG:0.0608108  |
| chr28 | 10537895 3                  | 304 | CTGTGTGTG:0.286184     | C:             |
|       | 0.453947                    |     |                        |                |
| chr28 | 10538001 3                  | 296 | T:0.682432             | TA:0.246622    |
|       | TAA:0.0709459               |     |                        |                |
| chr28 | 10538258 2                  | 292 | T:0.674658             | C:0.325342     |
| chr28 | 10538270 2                  | 294 | CA:0.778912            | C:0.221088     |
| chr28 | 10538288 2                  | 292 | C:0.934932             | T:0.0650685    |
| chr28 | 10538316 2                  | 296 | C:0.939189             | T:0.0608108    |
| chr28 | 10538331 2                  | 296 | A:0.939189             | T:0.0608108    |
| chr28 | 10538333 2                  | 296 | G:0.939189             | A:0.0608108    |

|                         |          |   |     |                |               |
|-------------------------|----------|---|-----|----------------|---------------|
| chr28                   | 10538383 | 3 | 312 | C:0.692308     | CCT:0.0608974 |
| CCTCTCTCT:0.246795      |          |   |     |                |               |
| chr28                   | 10538390 | 3 | 298 | ATC:0.52349    | A:0.154362    |
| CTC:0.322148            |          |   |     |                |               |
| chr28                   | 10538436 | 2 | 296 | A:0.719595     | T:0.280405    |
| chr28                   | 10538437 | 2 | 298 | A:0.959732     | T:0.0402685   |
| chr28                   | 10538626 | 2 | 290 | C:0.827586     | T:0.172414    |
| chr28                   | 10538656 | 2 | 306 | G:0.862745     | A:0.137255    |
| chr28                   | 10538661 | 2 | 314 | G:0.920382     | A:0.0796178   |
| chr28                   | 10538951 | 4 | 318 | TTTTA:0.606918 | T:0.194969    |
| TTTTATTTA:0.169811      |          |   |     |                |               |
| TTTTATTTATTTA:0.0283019 |          |   |     |                |               |
| chr28                   | 10538997 | 2 | 292 | CAGAG:0.671233 | C:0.328767    |
| chr28                   | 10539277 | 2 | 306 | G:0.915033     | A:0.0849673   |
| chr28                   | 10539510 | 2 | 298 | C:0.912752     | T:0.0872483   |
| chr28                   | 10539517 | 2 | 298 | G:0.761745     | A:0.238255    |
| chr28                   | 10539547 | 2 | 294 | C:0.972789     | T:0.0272109   |
| chr28                   | 10539548 | 2 | 292 | T:0.958904     | A:0.0410959   |
| chr28                   | 10539557 | 2 | 298 | G:0.936242     | T:0.0637584   |
| chr28                   | 10539625 | 2 | 306 | G:0.735294     | C:0.264706    |
| chr28                   | 10539801 | 2 | 302 | C:0.976821     | T:0.0231788   |
| chr28                   | 10539911 | 2 | 304 | T:0.6875       | C:0.3125      |
| chr28                   | 10540342 | 2 | 306 | G:0.732026     | A:0.267974    |
| chr28                   | 10540382 | 2 | 300 | T:0.943333     | C:0.0566667   |
| chr28                   | 10540621 | 2 | 308 | A:0.974026     | G:0.025974    |
| chr28                   | 10540628 | 2 | 306 | T:0.696078     | A:0.303922    |
| chr28                   | 10540871 | 2 | 302 | T:0.943709     | A:0.0562914   |
| chr28                   | 10540884 | 2 | 290 | A:0.755172     | AT:0.244828   |
| chr28                   | 10540929 | 2 | 246 | C:0.869919     | CAG:0.130081  |
| chr28                   | 10541015 | 2 | 270 | CG:0.974074    | C:0.0259259   |
| chr28                   | 10541076 | 2 | 302 | A:0            | C:1           |
| chr28                   | 10541096 | 2 | 302 | T:0            | G:1           |
| chr28                   | 10541101 | 2 | 302 | T:0            | A:1           |
| chr28                   | 10541103 | 2 | 302 | T:0            | A:1           |
| chr28                   | 10541118 | 2 | 302 | T:0            | A:1           |
| chr28                   | 10541125 | 2 | 302 | A:0            | C:1           |
| chr28                   | 10541264 | 2 | 146 | CCT:0.376712   | C:0.623288    |
| chr28                   | 10541327 | 2 | 246 | T:0.101626     | TA:0.898374   |
| chr28                   | 10541417 | 2 | 282 | A:0.929078     | G:0.070922    |
| chr28                   | 10541554 | 2 | 246 | G:0.939024     | A:0.0609756   |
| chr28                   | 10541916 | 2 | 302 | C:0.966887     | T:0.0331126   |
| chr28                   | 10541958 | 2 | 306 | G:0.728758     | A:0.271242    |
| chr28                   | 10541965 | 2 | 306 | C:0.728758     | T:0.271242    |
| chr28                   | 10542313 | 2 | 296 | ACT:0.665541   | A:0.334459    |
| chr28                   | 10542400 | 2 | 306 | C:0.928105     | T:0.0718954   |
| chr28                   | 10542690 | 2 | 304 | CG:0.950658    | C:0.0493421   |
| chr28                   | 10542732 | 2 | 298 | G:0.973154     | A:0.0268456   |
| chr28                   | 10543285 | 2 | 304 | A:0.947368     | G:0.0526316   |
| chr28                   | 10544144 | 2 | 310 | GATTA:0.954839 | G:0.0451613   |
| chr28                   | 10544407 | 2 | 282 | GC:0.489362    | G:0.510638    |
| chr28                   | 10544578 | 2 | 296 | A:0.962838     | G:0.0371622   |
| chr28                   | 10544598 | 2 | 292 | C:0.965753     | A:0.0342466   |
| chr28                   | 10544748 | 2 | 298 | C:0.97651      | T:0.0234899   |
| chr28                   | 10544902 | 2 | 304 | C:0.0657895    | T:0.934211    |
| chr28                   | 10544947 | 2 | 312 | G:0.958333     | A:0.0416667   |

|                                   |          |   |     |                    |                |
|-----------------------------------|----------|---|-----|--------------------|----------------|
| chr28                             | 10545316 | 2 | 302 | A:0.470199         | G:0.529801     |
| chr28                             | 10545752 | 2 | 292 | G:0.958904         | A:0.0410959    |
| chr28                             | 10545882 | 2 | 304 | T:0.980263         | C:0.0197368    |
| chr28                             | 10545941 | 2 | 296 | T:0.949324         | C:0.0506757    |
| chr28                             | 10546062 | 3 | 244 | GC:0.704918        | G:0.221311     |
| GCC:0.0737705                     |          |   |     |                    |                |
| chr28                             | 10546246 | 2 | 286 | G:0.958042         | A:0.041958     |
| chr28                             | 10546274 | 2 | 288 | AT:0.96875         | A:0.03125      |
| chr28                             | 10546470 | 2 | 288 | T:0.0451389        | G:0.954861     |
| chr28                             | 10546482 | 2 | 290 | ATC:0.982759       | A:0.0172414    |
| chr28                             | 10546594 | 2 | 236 | C:0.949153         | CCG:0.0508475  |
| chr28                             | 10546605 | 2 | 236 | C:0.949153         | T:0.0508475    |
| chr28                             | 10546670 | 2 | 288 | A:0.927083         | G:0.0729167    |
| chr28                             | 10546749 | 2 | 276 | G:0.913043         | GT:0.0869565   |
| chr28                             | 10546809 | 3 | 292 | C:0.934932         | G:0.0136986    |
| T:0.0513699                       |          |   |     |                    |                |
| chr28                             | 10546810 | 2 | 292 | A:0.934932         | G:0.0650685    |
| chr28                             | 10547311 | 2 | 286 | C:0.947552         | CG:0.0524476   |
| chr28                             | 10547549 | 2 | 308 | T:0.977273         | C:0.0227273    |
| chr28                             | 10547730 | 2 | 292 | C:0.979452         | T:0.0205479    |
| chr28                             | 10548151 | 2 | 296 | C:0.337838         | G:0.662162     |
| chr28                             | 10548254 | 2 | 246 | AAG:0.386179       | A:0.613821     |
| chr28                             | 10548327 | 2 | 212 | AAAAGAAAG:0.726415 | A:             |
| 0.273585                          |          |   |     |                    |                |
| chr28                             | 10548437 | 2 | 280 | G:0.403571         | GAAGAAAGA:     |
| 0.596429                          |          |   |     |                    |                |
| chr28                             | 10548616 | 2 | 300 | T:0.956667         | C:0.0433333    |
| chr28                             | 10548914 | 2 | 298 | G:0.95302          | A:0.0469799    |
| chr28                             | 10550186 | 2 | 310 | T:0.654839         | C:0.345161     |
| chr28                             | 10550235 | 2 | 300 | C:0.956667         | T:0.0433333    |
| chr28                             | 10550733 | 2 | 234 | TA:0.606838        | T:0.393162     |
| chr28                             | 10550976 | 2 | 304 | ATC:0.970395       | A:0.0296053    |
| chr28                             | 10551173 | 2 | 278 | C:0.830935         | G:0.169065     |
| chr28                             | 10551192 | 2 | 298 | A:0.946309         | AT:0.0536913   |
| chr28                             | 10551203 | 2 | 264 | TA:0.814394        | T:0.185606     |
| chr28                             | 10551273 | 2 | 302 | T:0.715232         | TGA:0.284768   |
| chr28                             | 10551427 | 2 | 274 | G:0.656934         | A:0.343066     |
| chr28                             | 10551575 | 3 | 304 | CTAAA:0.671053     | C:0.0394737    |
| CTAAATAAA:0.289474                |          |   |     |                    |                |
| chr28                             | 10551612 | 3 | 304 | T:0.680921         | A:0.0690789    |
| TAAAA:0.25                        |          |   |     |                    |                |
| chr28                             | 10551999 | 2 | 292 | G:0.688356         | A:0.311644     |
| chr28                             | 10552082 | 2 | 300 | G:0.65 C:0.35      |                |
| chr28                             | 10552149 | 2 | 314 | T:0.955414         | TAATC:0.044586 |
| chr28                             | 10552741 | 2 | 310 | CTT:0.66129        | C:0.33871      |
| chr28                             | 10552743 | 2 | 310 | T:0.66129          | TACAC:0.33871  |
| chr28                             | 10553306 | 2 | 308 | G:0.977273         | A:0.0227273    |
| chr28                             | 10553549 | 2 | 314 | G:0.984076         | C:0.0159236    |
| chr28                             | 10554159 | 2 | 302 | C:0.990066         | T:0.00993377   |
| chr28                             | 10555699 | 4 | 306 | CAG:0.683007       | C:0.0882353    |
| CAGAG:0.120915 CAGAGAGAG:0.107843 |          |   |     |                    |                |
| chr28                             | 10556187 | 2 | 284 | CCAGT:0.697183     | C:0.302817     |
| chr28                             | 10556286 | 2 | 258 | C:0.813953         | CATAT:0.186047 |
| chr28                             | 10556306 | 2 | 190 | TAC:0.936842       | T:0.0631579    |

|                |            |     |                          |                 |
|----------------|------------|-----|--------------------------|-----------------|
| chr28          | 10556310 2 | 240 | T:0.958333               | TAC:0.0416667   |
| chr28          | 10557662 2 | 310 | AAAC:0.983871            | A:0.016129      |
| chr28          | 10559647 2 | 310 | CGCCACCAT:0.63871        | C:              |
| 0.36129        |            |     |                          |                 |
| chr28          | 10560511 2 | 286 | T:0.660839               | TA:0.339161     |
| chr28          | 10561385 2 | 300 | G:0.99 A:0.01            |                 |
| chr28          | 10561624 2 | 272 | G:0.944853               | A:0.0551471     |
| chr28          | 10561781 2 | 138 | T:0.485507               | TA:0.514493     |
| chr28          | 10561958 2 | 86  | GAGGA:0.732558           | G:0.267442      |
| chr28          | 10562746 3 | 298 | CCT:0.483221             | C:0.318792      |
| CCTCT:0.197987 |            |     |                          |                 |
| chr28          | 10562865 2 | 300 | C:0.81 G:0.19            |                 |
| chr28          | 10563588 2 | 288 | C:0.934028               | T:0.0659722     |
| chr28          | 10563736 2 | 314 | G:0.697452               | A:0.302548      |
| chr28          | 10563944 2 | 290 | CCTCT:0.613793           | C:0.386207      |
| chr28          | 10563995 2 | 288 | TA:0.704861              | T:0.295139      |
| chr28          | 10563996 2 | 304 | A:0.957237               | T:0.0427632     |
| chr28          | 10565183 2 | 298 | C:0.852349               | T:0.147651      |
| chr28          | 10565409 2 | 282 | TA:0.535461              | T:0.464539      |
| chr28          | 10565818 2 | 312 | T:0.875 G:0.125          |                 |
| chr28          | 10566177 2 | 302 | GT:0.615894              | G:0.384106      |
| chr28          | 10566240 2 | 308 | GGGAAGAAA:0.711039       | G:              |
| 0.288961       |            |     |                          |                 |
| chr28          | 10566893 2 | 296 | T:0.655405               | C:0.344595      |
| chr28          | 10567203 2 | 312 | G:0.961538               | T:0.0384615     |
| chr28          | 10567759 2 | 310 | ACAGGCTAACAACTG:0.612903 | A:              |
| 0.387097       |            |     |                          |                 |
| chr28          | 10568250 2 | 290 | T:0.955172               | TA:0.0448276    |
| chr28          | 10568591 2 | 304 | G:0.990132               | A:0.00986842    |
| chr28          | 10568623 2 | 304 | A:0.628289               | G:0.371711      |
| chr28          | 10569503 2 | 294 | A:0.666667               | G:0.333333      |
| chr28          | 10569890 2 | 294 | A:0.70068                | T:0.29932       |
| chr28          | 10569998 2 | 300 | CT:0.966667              | C:0.0333333     |
| chr28          | 10571008 2 | 302 | T:0.639073               | C:0.360927      |
| chr28          | 10571845 2 | 310 | T:0.667742               | C:0.332258      |
| chr28          | 10572371 2 | 304 | A:0.894737               | T:0.105263      |
| chr28          | 10573035 2 | 308 | C:0.688312               | CAAGAA:0.311688 |
| chr28          | 10573367 2 | 314 | T:0.643312               | C:0.356688      |
| chr28          | 10573672 2 | 304 | C:0.671053               | A:0.328947      |
| chr28          | 10574227 2 | 302 | G:0.970199               | A:0.0298013     |
| chr28          | 10574663 2 | 294 | G:0.615646               | A:0.384354      |
| chr28          | 10574717 2 | 282 | C:0.712766               | G:0.287234      |
| chr28          | 10574739 2 | 310 | A:0.945161               | AT:0.0548387    |
| chr28          | 10574749 2 | 310 | A:0.945161               | AT:0.0548387    |
| chr28          | 10574760 2 | 310 | A:0.945161               | AG:0.0548387    |
| chr28          | 10575007 2 | 302 | A:0.629139               | G:0.370861      |
| chr28          | 10575338 2 | 286 | C:0.451049               | CT:0.548951     |
| chr28          | 10575340 2 | 298 | T:0.889262               | C:0.110738      |
| chr28          | 10575737 2 | 280 | G:0.967857               | A:0.0321429     |
| chr28          | 10576071 3 | 284 | T:0.334507               | A:0.31338       |
| TA:0.352113    |            |     |                          |                 |
| chr28          | 10576074 2 | 284 | A:0.68662                | AT:0.31338      |
| chr28          | 10576100 2 | 302 | A:0.996689               | T:0.00331126    |
| chr28          | 10576262 2 | 238 | C:0.680672               | CT:0.319328     |

|                     |            |     |                   |                 |
|---------------------|------------|-----|-------------------|-----------------|
| chr28               | 10576306 2 | 294 | C:0.955782        | CAGAG:0.0442177 |
| chr28               | 10576365 2 | 296 | C:0.969595        | T:0.0304054     |
| chr28               | 10576729 2 | 282 | C:0.836879        | T:0.163121      |
| chr28               | 10576852 2 | 308 | T:0.646104        | C:0.353896      |
| chr28               | 10576884 2 | 288 | C:0.704861        | CA:0.295139     |
| chr28               | 10576892 3 | 298 | A:0.936242        | T:0.0234899     |
| AT:0.0402685        |            |     |                   |                 |
| chr28               | 10576911 2 | 300 | AAAAT:0.95        | A:0.05          |
| chr28               | 10576941 2 | 294 | G:0.969388        | A:0.0306122     |
| chr28               | 10577125 2 | 272 | T:0.856618        | TA:0.143382     |
| chr28               | 10577126 2 | 278 | T:0.705036        | A:0.294964      |
| chr28               | 10577379 2 | 290 | G:0.958621        | A:0.0413793     |
| chr28               | 10577506 2 | 256 | TA:0.585938       | T:0.414062      |
| chr28               | 10577805 3 | 298 | C:0.708054        | CCT:0.265101    |
| CCTCT:0.0268456     |            |     |                   |                 |
| chr28               | 10577855 2 | 310 | AAAATAAAT:0.63871 | A:              |
| 0.36129             |            |     |                   |                 |
| chr28               | 10578996 2 | 310 | T:0.645161        | TAAC:0.354839   |
| chr28               | 10579062 2 | 310 | AAG:0.658065      | A:0.341935      |
| chr28               | 10580462 2 | 286 | C:0.947552        | CT:0.0524476    |
| chr28               | 10580464 2 | 280 | TA:0.925 T:0.075  |                 |
| chr28               | 10581386 2 | 294 | GA:0.639456       | G:0.360544      |
| chr28               | 10581895 2 | 302 | C:0.917219        | T:0.0827815     |
| chr28               | 10581982 2 | 308 | A:0.996753        | T:0.00324675    |
| chr28               | 10582211 2 | 306 | T:0.95098         | C:0.0490196     |
| chr28               | 10582988 2 | 304 | C:0.960526        | T:0.0394737     |
| chr28               | 10583824 3 | 302 | CA:0.695364       | C:0.109272      |
| CAAA:0.195364       |            |     |                   |                 |
| chr28               | 10584077 2 | 290 | C:0.713793        | A:0.286207      |
| chr28               | 10584152 2 | 296 | CCT:0.601351      | C:0.398649      |
| chr28               | 10584919 2 | 304 | A:0.628289        | G:0.371711      |
| chr28               | 10585831 2 | 320 | AT:0.8 A:0.2      |                 |
| chr28               | 10586056 2 | 304 | T:0.858553        | A:0.141447      |
| chr28               | 10586531 2 | 286 | T:0.646853        | C:0.353147      |
| chr28               | 10586537 2 | 286 | G:0.954545        | A:0.0454545     |
| chr28               | 10587009 2 | 312 | A:0.913462        | AAATG:0.0865385 |
| chr28               | 10588186 2 | 298 | C:0.473154        | CA:0.526846     |
| chr28               | 10588731 2 | 304 | C:0.615132        | T:0.384868      |
| chr28               | 10589102 2 | 298 | T:0.818792        | TA:0.181208     |
| chr28               | 10590953 2 | 290 | A:0.665517        | G:0.334483      |
| chr28               | 10591396 2 | 298 | G:0.869128        | GA:0.130872     |
| chr28               | 10591455 2 | 306 | T:0.964052        | A:0.0359477     |
| chr28               | 10591516 2 | 258 | TG:0.713178       | T:0.286822      |
| chr28               | 10592814 2 | 288 | TA:0.625 T:0.375  |                 |
| chr28               | 10592845 2 | 302 | A:0.649007        | G:0.350993      |
| chr28               | 10593145 2 | 290 | CA:0.855172       | C:0.144828      |
| chr28               | 10594082 2 | 304 | TA:0.976974       | T:0.0230263     |
| chr28               | 10594538 2 | 294 | G:0.608844        | GA:0.391156     |
| chr28               | 10594595 2 | 304 | T:0.631579        | C:0.368421      |
| chr28               | 10594959 2 | 306 | T:0.823529        | G:0.176471      |
| chr28               | 10595189 2 | 306 | T:0.633987        | A:0.366013      |
| chr28               | 10595758 3 | 310 | G:0.793548        | GAATA:0.164516  |
| GAATAAATA:0.0419355 |            |     |                   |                 |
| chr28               | 10596022 3 | 250 | CTT:0.62 C:0.196  | CT:0.184        |



|                          |            |     |                      |                   |
|--------------------------|------------|-----|----------------------|-------------------|
| chr28                    | 10596068 2 | 292 | T:0.643836           | TAAAG:0.356164    |
| chr28                    | 10596279 2 | 316 | CCTCTCTCTCT:0.503165 | C:                |
| 0.496835                 |            |     |                      |                   |
| chr28                    | 10596340 2 | 290 | TA:0.931034          | T:0.0689655       |
| chr28                    | 10596511 2 | 308 | T:0.944805           | G:0.0551948       |
| chr28                    | 10596926 2 | 292 | C:0.976027           | T:0.0239726       |
| chr28                    | 10596936 2 | 290 | G:0.951724           | A:0.0482759       |
| chr28                    | 10598903 2 | 290 | A:0.655172           | G:0.344828        |
| chr28                    | 10599477 2 | 286 | G:0.884615           | A:0.115385        |
| chr28                    | 10600160 2 | 300 | TTTG:0.673333        | T:0.326667        |
| chr28                    | 10600172 2 | 304 | G:0.967105           | T:0.0328947       |
| chr28                    | 10600191 2 | 300 | C:0.973333           | CAGAG:0.0266667   |
| chr28                    | 10600289 2 | 292 | A:0.657534           | G:0.342466        |
| chr28                    | 10600456 2 | 308 | AT:0.62987           | A:0.37013         |
| chr28                    | 10600860 2 | 308 | A:0.623377           | C:0.376623        |
| chr28                    | 10601025 2 | 290 | A:0.644828           | G:0.355172        |
| chr28                    | 10601393 2 | 302 | C:0.960265           | T:0.0397351       |
| chr28                    | 10601547 3 | 298 | TA:0.45302           | T:0.238255        |
| AA:0.308725              |            |     |                      |                   |
| chr28                    | 10601552 2 | 300 | A:0.873333           | T:0.126667        |
| chr28                    | 10601895 2 | 294 | C:0.615646           | T:0.384354        |
| chr28                    | 10602230 2 | 280 | A:0.628571           | G:0.371429        |
| chr28                    | 10602417 2 | 286 | A:0.601399           | G:0.398601        |
| chr28                    | 10602631 2 | 300 | A:0 T:1              |                   |
| chr28                    | 10602632 2 | 300 | A:0 T:1              |                   |
| chr28                    | 10604178 2 | 270 | A:0.974074           | T:0.0259259       |
| chr28                    | 10604330 2 | 300 | TA:0.27 T:0.73       |                   |
| chr28                    | 10606620 2 | 304 | T:0.713816           | A:0.286184        |
| chr28                    | 10607017 2 | 258 | C:0.790698           | CCT:0.209302      |
| chr28                    | 10607070 2 | 296 | T:0.635135           | TA:0.364865       |
| chr28                    | 10607627 2 | 304 | A:0.664474           | AGGCTCCT:0.335526 |
| chr28                    | 10608406 2 | 308 | A:0.516234           | AGATT:0.483766    |
| chr28                    | 10609257 2 | 308 | T:0.970779           | TA:0.0292208      |
| chr28                    | 10609343 2 | 308 | T:0.99026            | C:0.00974026      |
| chr28                    | 10609455 2 | 296 | G:0.64527            | T:0.35473         |
| chr28                    | 10609610 2 | 312 | C:0.621795           | T:0.378205        |
| chr28                    | 10610000 2 | 316 |                      |                   |
| CTTAGGATGTTTCAGTTTC##### |            |     |                      |                   |
| TT:0                     | C:1        |     |                      |                   |
| chr28                    | 10610363 2 | 290 | CT:0.906897          | C:0.0931034       |
| chr28                    | 10610502 2 | 290 | G:0.682759           | A:0.317241        |
| chr28                    | 10610893 2 | 300 | G:0.966667           | C:0.0333333       |
| chr28                    | 10611159 2 | 298 | T:0.922819           | C:0.0771812       |
| chr28                    | 10612139 2 | 192 | C:0.947917           | T:0.0520833       |
| chr28                    | 10612291 2 | 132 | T:0.560606           | TA:0.439394       |
| chr28                    | 10612743 2 | 304 | C:0.953947           | T:0.0460526       |
| chr28                    | 10612925 2 | 298 | A:0.865772           | G:0.134228        |
| chr28                    | 10612928 2 | 298 | A:0.644295           | G:0.355705        |
| chr28                    | 10613580 2 | 284 | T:0.647887           | C:0.352113        |
| chr28                    | 10613752 2 | 280 | CCT:0.603571         | C:0.396429        |
| chr28                    | 10613808 2 | 300 | AT:0.66 A:0.34       |                   |
| chr28                    | 10613812 2 | 302 | T:0.980132           | A:0.0198675       |
| chr28                    | 10614272 2 | 240 | A:0.979167           | C:0.0208333       |
| chr28                    | 10614821 2 | 294 | G:0.622449           | T:0.377551        |

|       |                         |     |                        |                |
|-------|-------------------------|-----|------------------------|----------------|
| chr28 | 10615196 3              | 294 | ATT:0.639456           | A:0.0510204    |
|       | AT:0.309524             |     |                        |                |
| chr28 | 10615512 2              | 304 | T:0.694079             | G:0.305921     |
| chr28 | 10617162 4              | 316 | GATTTATTT:0.398734     | G:             |
|       | 0.189873 GATTT:0.193038 |     | GATTTATTTATTT:0.218354 |                |
| chr28 | 10617438 2              | 290 | G:0.937931             | A:0.062069     |
| chr28 | 10617682 2              | 288 | C:0.635417             | CA:0.364583    |
| chr28 | 10617699 2              | 288 | C:0                    | T:1            |
| chr28 | 10617780 2              | 300 | G:0                    | A:1            |
| chr28 | 10617826 2              | 300 | G:0                    | A:1            |
| chr28 | 10617832 2              | 300 | CT:0                   | C:1            |
| chr28 | 10617839 2              | 300 | T:0                    | A:1            |
| chr28 | 10617854 2              | 298 | C:0                    | A:1            |
| chr28 | 10617869 2              | 294 | C:0                    | A:1            |
| chr28 | 10617903 2              | 312 | T:0                    | TA:1           |
| chr28 | 10617918 2              | 312 | A:0                    | T:1            |
| chr28 | 10617919 2              | 312 | T:0                    | A:1            |
| chr28 | 10617927 2              | 312 | A:0                    | AT:1           |
| chr28 | 10617929 2              | 312 | A:0                    | T:1            |
| chr28 | 10617963 2              | 312 | TG:0                   | T:1            |
| chr28 | 10617977 2              | 312 | GA:0                   | G:1            |
| chr28 | 10618000 2              | 312 | G:0                    | A:1            |
| chr28 | 10618010 2              | 312 | A:0                    | AC:1           |
| chr28 | 10618031 2              | 312 | T:0                    | C:1            |
| chr28 | 10618032 2              | 312 | T:0                    | C:1            |
| chr28 | 10618246 2              | 128 | CTA:0.851562           | C:0.148438     |
| chr28 | 10618248 2              | 128 | A:0.15625              | C:0.84375      |
| chr28 | 10618872 2              | 300 | T:0.98                 | G:0.02         |
| chr28 | 10618890 2              | 300 | A:0.87                 | G:0.13         |
| chr28 | 10619117 2              | 300 | A:0.946667             | T:0.0533333    |
| chr28 | 10619145 3              | 304 | CAGAGAG:0.578947       | C:0.0953947    |
|       | CAG:0.325658            |     |                        |                |
| chr28 | 10619482 2              | 286 | A:0.646853             | G:0.353147     |
| chr28 | 10619486 2              | 286 | C:0.646853             | CAG:0.353147   |
| chr28 | 10619721 2              | 296 | GTGGC:0.716216         | G:0.283784     |
| chr28 | 10619871 2              | 260 | GCT:0.980769           | G:0.0192308    |
| chr28 | 10621164 2              | 288 | G:0.444444             | T:0.555556     |
| chr28 | 10621953 2              | 226 | C:0.402655             | T:0.597345     |
| chr28 | 10621964 2              | 244 | A:0.389344             | G:0.610656     |
| chr28 | 10622622 2              | 316 | GC:0.617089            | G:0.382911     |
| chr28 | 10622643 2              | 316 | G:0.617089             | GTGA:0.382911  |
| chr28 | 10622647 2              | 316 | TAGG:0.617089          | T:0.382911     |
| chr28 | 10622771 2              | 316 | T:0.920886             | TAAA:0.0791139 |
| chr28 | 10622878 2              | 302 | G:0.705298             | A:0.294702     |
| chr28 | 10622883 2              | 302 | T:0.705298             | C:0.294702     |
| chr28 | 10622935 2              | 286 | T:0.671329             | G:0.328671     |
| chr28 | 10623376 2              | 312 | C:0.958333             | T:0.0416667    |
| chr28 | 10624357 2              | 282 | G:0.620567             | T:0.379433     |
| chr28 | 10624425 2              | 294 | C:0.853741             | A:0.146259     |
| chr28 | 10625989 2              | 310 | T:0.532258             | A:0.467742     |
| chr28 | 10626000 2              | 308 | T:0.525974             | C:0.474026     |
| chr28 | 10626353 2              | 300 | A:0.88                 | T:0.12         |
| chr28 | 10626516 2              | 304 | A:0.565789             | G:0.434211     |
| chr28 | 10627065 2              | 292 | T:0.996575             | C:0.00342466   |

|             |          |               |     |                                 |                |
|-------------|----------|---------------|-----|---------------------------------|----------------|
| chr28       | 10627402 | 2             | 304 | A:0.401316                      | G:0.598684     |
| chr28       | 10627470 | 2             | 308 | A:0.594156                      | G:0.405844     |
| chr28       | 10627479 | 2             | 308 | A:0.594156                      | C:0.405844     |
| chr28       | 10627673 | 2             | 298 | A:0.630872                      | G:0.369128     |
| chr28       | 10627837 | 2             | 300 | G:0.353333                      | A:0.646667     |
| chr28       | 10628053 | 4             | 294 | TAA:0.272109                    | T:0.105442     |
| TA:0.482993 |          | TAAA:0.139456 |     |                                 |                |
| chr28       | 10628054 | 2             | 300 | A:0.983333                      | C:0.016667     |
| chr28       | 10628554 | 2             | 302 | T:0.397351                      | C:0.602649     |
| chr28       | 10628556 | 2             | 302 | C:0.397351                      | G:0.602649     |
| chr28       | 10628630 | 2             | 292 | A:0.965753                      | G:0.0342466    |
| chr28       | 10628686 | 2             | 300 | C:0.343333                      | T:0.656667     |
| chr28       | 10629369 | 2             | 300 | A:0.626667                      | G:0.373333     |
| chr28       | 10629607 | 2             | 296 | C:0.989865                      | T:0.0101351    |
| chr28       | 10629969 | 2             | 318 | GGAGAGAGAGAGAGAGA:0.584906      |                |
| G:0.415094  |          |               |     |                                 |                |
| chr28       | 10630008 | 2             | 318 | CAGAGA:0.584906                 | C:0.415094     |
| chr28       | 10630016 | 2             | 318 | C:0.584906                      | CT:0.415094    |
| chr28       | 10630026 | 2             | 318 | GAGAAGCAGGCTCCATGCAGGA:0.584906 |                |
| G:0.415094  |          |               |     |                                 |                |
| chr28       | 10630251 | 2             | 308 | T:0.795455                      | C:0.204545     |
| chr28       | 10630452 | 2             | 292 | G:0.880137                      | T:0.119863     |
| chr28       | 10630515 | 2             | 300 | C:0.38                          | T:0.62         |
| chr28       | 10630780 | 2             | 302 | T:0.380795                      | G:0.619205     |
| chr28       | 10630830 | 2             | 286 | A:0.688811                      | AT:0.311189    |
| chr28       | 10630953 | 2             | 286 | G:0.646853                      | T:0.353147     |
| chr28       | 10630963 | 2             | 284 | C:0.908451                      | T:0.0915493    |
| chr28       | 10631066 | 2             | 298 | T:0                             | C:1            |
| chr28       | 10631096 | 2             | 308 | C:0                             | T:1            |
| chr28       | 10631098 | 2             | 308 | G:0                             | T:1            |
| chr28       | 10631733 | 2             | 310 | T:0.0806452                     | C:0.919355     |
| chr28       | 10631854 | 2             | 308 | C:0.188312                      | A:0.811688     |
| chr28       | 10632105 | 2             | 290 | A:0.389655                      | G:0.610345     |
| chr28       | 10632233 | 2             | 304 | T:0.940789                      | G:0.0592105    |
| chr28       | 10632242 | 2             | 304 | A:0.355263                      | G:0.644737     |
| chr28       | 10632248 | 2             | 306 | T:0.973856                      | C:0.0261438    |
| chr28       | 10632600 | 2             | 306 | T:0.973856                      | C:0.0261438    |
| chr28       | 10632617 | 2             | 298 | A:0.734899                      | G:0.265101     |
| chr28       | 10632699 | 2             | 284 | T:0.640845                      | C:0.359155     |
| chr28       | 10632728 | 2             | 280 | G:0.867857                      | C:0.132143     |
| chr28       | 10632911 | 2             | 242 | AT:0.789256                     | A:0.210744     |
| chr28       | 10633163 | 2             | 278 | G:0                             | C:1            |
| chr28       | 10633165 | 2             | 278 | C:0                             | A:1            |
| chr28       | 10633202 | 2             | 302 | ATGTC:0.970199                  | A:0.0298013    |
| chr28       | 10633728 | 2             | 286 | A:0.884615                      | AT:0.115385    |
| chr28       | 10633784 | 2             | 292 | A:0.859589                      | G:0.140411     |
| chr28       | 10633815 | 2             | 300 | A:0.86                          | T:0.14         |
| chr28       | 10633825 | 2             | 300 | G:0.86                          | C:0.14         |
| chr28       | 10633919 | 2             | 298 | T:0.275168                      | A:0.724832     |
| chr28       | 10633945 | 2             | 310 | TA:0.867742                     | T:0.132258     |
| chr28       | 10634021 | 2             | 294 | C:0.887755                      | CTCCA:0.112245 |
| chr28       | 10634257 | 2             | 312 | TTAAAAAAAAAAAA:0.907051         | T:             |
| 0.0929487   |          |               |     |                                 |                |
| chr28       | 10634258 | 3             | 312 | TAAAAAAAA:0.913462              | TAAAA:         |

|                  |          |             |     |                   |               |
|------------------|----------|-------------|-----|-------------------|---------------|
| 0.0416667        |          | T:0.0448718 |     |                   |               |
| chr28            | 10634262 | 2           | 312 | AAAAAAAT:0.964744 | A:            |
| 0.0352564        |          |             |     |                   |               |
| chr28            | 10634264 | 2           | 318 | A:0.805031        | AATATATTC:    |
| 0.194969         |          |             |     |                   |               |
| chr28            | 10634266 | 3           | 316 | A:0.731013        | T:0.237342    |
| AAAAT:0.0316456  |          |             |     |                   |               |
| chr28            | 10634268 | 2           | 314 | A:0.773885        | T:0.226115    |
| chr28            | 10634269 | 2           | 302 | AT:0.970199       | A:0.0298013   |
| chr28            | 10634270 | 3           | 318 | T:0.779874        | TTC:0.160377  |
| TTCAA:0.0597484  |          |             |     |                   |               |
| chr28            | 10634271 | 2           | 308 | AAATAAAT:0.970779 | A:            |
| 0.0292208        |          |             |     |                   |               |
| chr28            | 10634272 | 3           | 318 | AAT:0.808176      | TAT:0.0314465 |
| A:0.160377       |          |             |     |                   |               |
| chr28            | 10634274 | 2           | 308 | TAAA:0.977273     | T:0.0227273   |
| chr28            | 10634279 | 2           | 308 | A:0.977273        | C:0.0227273   |
| chr28            | 10634281 | 2           | 308 | ATAAAT:0.977273   | A:0.0227273   |
| chr28            | 10634487 | 2           | 300 | A:0.41 G:0.59     |               |
| chr28            | 10634607 | 2           | 296 | AAAG:0.956081     | A:0.0439189   |
| chr28            | 10634747 | 2           | 280 | C:0.375 CA:0.625  |               |
| chr28            | 10634817 | 2           | 284 | G:0.383803        | C:0.616197    |
| chr28            | 10634840 | 2           | 282 | T:0.365248        | C:0.634752    |
| chr28            | 10635490 | 2           | 196 | C:0.923469        | A:0.0765306   |
| chr28            | 10636541 | 2           | 208 | T:0.0913462       | G:0.908654    |
| chr28            | 10636814 | 2           | 284 | C:0.848592        | CCT:0.151408  |
| chr28            | 10637002 | 2           | 302 | A:0.109272        | G:0.890728    |
| chr28            | 10637235 | 2           | 274 | TG:0.90146        | T:0.0985401   |
| chr28            | 10637237 | 2           | 274 | G:0.959854        | T:0.040146    |
| chr28            | 10638364 | 2           | 294 | G:0.969388        | GT:0.0306122  |
| chr28            | 10638365 | 2           | 294 | G:0.969388        | T:0.0306122   |
| chr28            | 10638401 | 2           | 306 | G:0.722222        | A:0.277778    |
| chr28            | 10638429 | 2           | 308 | C:0.970779        | T:0.0292208   |
| chr28            | 10638694 | 2           | 306 | G:0.823529        | A:0.176471    |
| chr28            | 10638697 | 2           | 306 | T:0.849673        | C:0.150327    |
| chr28            | 10638806 | 2           | 314 | T:0.547771        | C:0.452229    |
| chr28            | 10638899 | 2           | 298 | T:0.580537        | A:0.419463    |
| chr28            | 10639109 | 2           | 296 | A:0.912162        | G:0.0878378   |
| chr28            | 10639164 | 2           | 306 | T:0.120915        | C:0.879085    |
| chr28            | 10639509 | 2           | 298 | GT:0.966443       | G:0.033557    |
| chr28            | 10639510 | 3           | 302 | T:0.877483        | TGG:0.0728477 |
| TGGG:0.0496689   |          |             |     |                   |               |
| chr28            | 10639511 | 2           | 294 | GT:0.748299       | G:0.251701    |
| chr28            | 10639512 | 2           | 294 | T:0.806122        | G:0.193878    |
| chr28            | 10639567 | 3           | 278 | G:0.741007        | GA:0.226619   |
| GAA:0.0323741    |          |             |     |                   |               |
| chr28            | 10639837 | 2           | 292 | C:0.414384        | T:0.585616    |
| chr28            | 10639951 | 3           | 304 | C:0.506579        | CCT:0.319079  |
| CCTCTCT:0.174342 |          |             |     |                   |               |
| chr28            | 10640000 | 2           | 290 | AT:0.972414       | A:0.0275862   |
| chr28            | 10640010 | 2           | 274 | A:0.70438         | T:0.29562     |
| chr28            | 10640011 | 2           | 274 | T:0.70438         | A:0.29562     |
| chr28            | 10640012 | 2           | 290 | A:0.972414        | T:0.0275862   |
| chr28            | 10640013 | 2           | 290 | A:0.972414        | T:0.0275862   |

|                            |          |   |     |                           |          |               |
|----------------------------|----------|---|-----|---------------------------|----------|---------------|
| chr28                      | 10640083 | 2 | 296 | G:0                       | C:1      |               |
| chr28                      | 10640091 | 2 | 296 | G:0                       | C:1      |               |
| chr28                      | 10640200 | 2 | 304 | T:0.973684                |          | A:0.0263158   |
| chr28                      | 10640201 | 2 | 296 | T:0.763514                |          | A:0.236486    |
| chr28                      | 10640230 | 2 | 284 | C:0.78169                 |          | CAG:0.21831   |
| chr28                      | 10640250 | 2 | 282 | G:0.407801                |          | GA:0.592199   |
| chr28                      | 10640251 | 2 | 282 | G:0.407801                |          | GA:0.592199   |
| chr28                      | 10640316 | 2 | 280 | C:0.139286                |          | G:0.860714    |
| chr28                      | 10640330 | 2 | 292 | C:0.969178                |          | T:0.0308219   |
| chr28                      | 10640350 | 2 | 282 | C:0.326241                |          | T:0.673759    |
| chr28                      | 10640363 | 2 | 288 | C:0.972222                |          | T:0.0277778   |
| chr28                      | 10640400 | 2 | 292 | G:0.181507                |          | GA:0.818493   |
| chr28                      | 10640523 | 3 | 306 | CTTT:0.00326797           |          | C:0.869281    |
| CTT:0.127451               |          |   |     |                           |          |               |
| chr28                      | 10640567 | 2 | 298 | T:0.409396                |          | A:0.590604    |
| chr28                      | 10640568 | 2 | 298 | A:0.97651                 |          | T:0.0234899   |
| chr28                      | 10640569 | 2 | 298 | A:0.97651                 |          | T:0.0234899   |
| chr28                      | 10641158 | 2 | 294 | A:0.870748                |          | C:0.129252    |
| chr28                      | 10641161 | 2 | 292 | GA:0.0273973              |          | G:0.972603    |
| chr28                      | 10641648 | 2 | 300 | T:0.48                    | G:0.52   |               |
| chr28                      | 10642984 | 2 | 298 | G:0.473154                |          | A:0.526846    |
| chr28                      | 10643363 | 2 | 228 | C:0.201754                |          | G:0.798246    |
| chr28                      | 10643973 | 2 | 312 | T:0.830128                |          | C:0.169872    |
| chr28                      | 10644364 | 2 | 292 | C:0.64726                 |          | T:0.35274     |
| chr28                      | 10644502 | 2 | 284 | T:0.556338                |          | C:0.443662    |
| chr28                      | 10644704 | 2 | 282 | G:0.907801                |          | A:0.0921986   |
| chr28                      | 10644856 | 2 | 306 | C:0.69281                 |          | CCTCT:0.30719 |
| chr28                      | 10644871 | 2 | 292 | CTGTG:0.85274             |          | C:0.14726     |
| chr28                      | 10644873 | 2 | 306 | G:0.69281                 |          | C:0.30719     |
| chr28                      | 10644911 | 2 | 302 | TAAAA:0.539735            |          | T:0.460265    |
| chr28                      | 10644941 | 2 | 302 | T:0.13245                 |          | C:0.86755     |
| chr28                      | 10645306 | 2 | 292 | T:0.633562                |          | G:0.366438    |
| chr28                      | 10645376 | 2 | 302 | C:0.870861                |          | T:0.129139    |
| chr28                      | 10645404 | 2 | 304 | G:0.661184                |          | C:0.338816    |
| chr28                      | 10645750 | 2 | 284 | C:0.84507                 |          | T:0.15493     |
| chr28                      | 10645875 | 2 | 310 | A:0.851613                |          | AT:0.148387   |
| chr28                      | 10645877 | 2 | 308 | A:0.743506                |          | T:0.256494    |
| chr28                      | 10645886 | 2 | 312 | AAAAATAAAAT:0.836538      |          | A:            |
| 0.163462                   |          |   |     |                           |          |               |
| chr28                      | 10645933 | 2 | 308 | A:0.847403                |          | T:0.152597    |
| chr28                      | 10646181 | 2 | 304 | C:0.858553                |          | T:0.141447    |
| chr28                      | 10646700 | 2 | 296 | C:0.560811                |          | A:0.439189    |
| chr28                      | 10646902 | 2 | 294 | G:0.598639                |          | A:0.401361    |
| chr28                      | 10646921 | 2 | 296 | T:0.881757                |          | C:0.118243    |
| chr28                      | 10646983 | 2 | 306 | G:0.565359                |          | C:0.434641    |
| chr28                      | 10647487 | 2 | 304 | G:0.625                   | GT:0.375 |               |
| chr28                      | 10647679 | 2 | 296 | C:0.567568                |          | T:0.432432    |
| chr28                      | 10647999 | 2 | 298 | G:0.989933                |          | A:0.0100671   |
| chr28                      | 10648322 | 4 | 180 | TGGCGGCGGCGGCGGC:0.438889 |          | T:            |
| 0.366667 TGGCGGC:0.0888889 |          |   |     |                           |          |               |
| chr28                      | 10648328 | 2 | 164 | C:0.97561                 |          | T:0.0243902   |
| chr28                      | 10648331 | 2 | 162 | C:0.882716                |          | T:0.117284    |
| chr28                      | 10648334 | 2 | 160 | C:0.975                   | T:0.025  |               |
| chr28                      | 10648337 | 2 | 128 | C:0.734375                |          | T:0.265625    |

|                |          |   |     |                               |                 |
|----------------|----------|---|-----|-------------------------------|-----------------|
| chr28          | 10650449 | 2 | 302 | GAC:0.798013                  | G:0.201987      |
| chr28          | 10650524 | 2 | 292 | G:0.982877                    | A:0.0171233     |
| chr28          | 10651103 | 2 | 260 | GT:0.653846                   | G:0.346154      |
| chr28          | 10651360 | 2 | 316 | T:0.860759                    | TTTGATGCGTCTG:  |
| 0.139241       |          |   |     |                               |                 |
| chr28          | 10653423 | 3 | 276 | TTC:0.565217                  | T:0.358696      |
| TTCTC:0.076087 |          |   |     |                               |                 |
| chr28          | 10654846 | 2 | 312 | C:0.977564                    | CCTCT:0.0224359 |
| chr28          | 10654982 | 2 | 306 | C:0.660131                    | T:0.339869      |
| chr28          | 10655254 | 2 | 310 | C:0.990323                    | A:0.00967742    |
| chr28          | 10658845 | 2 | 300 | G:0.976667                    | A:0.0233333     |
| chr28          | 10660157 | 2 | 266 | G:0.796992                    | GT:0.203008     |
| chr28          | 10660205 | 2 | 290 | A:0.865517                    | G:0.134483      |
| chr28          | 10660330 | 2 | 296 | C:0.638514                    | T:0.361486      |
| chr28          | 10660506 | 2 | 294 | G:0.727891                    | GTC:0.272109    |
| chr28          | 10660516 | 3 | 296 | C:0.888514                    | G:0.0608108     |
| CTG:0.0506757  |          |   |     |                               |                 |
| chr28          | 10660985 | 2 | 298 | TA:0.92953                    | T:0.0704698     |
| chr28          | 10661219 | 2 | 236 | C:0.817797                    | CT:0.182203     |
| chr28          | 10663314 | 3 | 274 | CT:0.591241                   | C:0.120438      |
| CTT:0.288321   |          |   |     |                               |                 |
| chr28          | 10664419 | 2 | 286 | C:0.870629                    | CT:0.129371     |
| chr28          | 10664431 | 2 | 290 | A:0.924138                    | AT:0.0758621    |
| chr28          | 10664460 | 2 | 292 | C:0.640411                    | CAG:0.359589    |
| chr28          | 10664886 | 2 | 306 | C:0.866013                    | T:0.133987      |
| chr28          | 10666011 | 2 | 306 | A:0.960784                    | T:0.0392157     |
| chr28          | 10667082 | 2 | 312 | G:0.983974                    | A:0.0160256     |
| chr28          | 10668639 | 3 | 242 | GAAA:0.53719                  | G:0.161157      |
| GA:0.301653    |          |   |     |                               |                 |
| chr28          | 10668690 | 2 | 218 | TC:0.5                        | T:0.5           |
| chr28          | 10670738 | 2 | 302 | C:0.887417                    | T:0.112583      |
| chr28          | 10673042 | 2 | 296 | T:0.945946                    | G:0.0540541     |
| chr28          | 10674395 | 2 | 302 | C:0.950331                    | T:0.0496689     |
| chr28          | 10674646 | 2 | 290 | G:0.989655                    | A:0.0103448     |
| chr28          | 10675012 | 2 | 292 | A:0.952055                    | G:0.0479452     |
| chr28          | 10675344 | 2 | 304 | G:0.970395                    | A:0.0296053     |
| chr28          | 10675556 | 2 | 310 | T:0.987097                    | C:0.0129032     |
| chr28          | 10676284 | 2 | 304 | A:0.914474                    | G:0.0855263     |
| chr28          | 10676356 | 2 | 294 | C:0.969388                    | A:0.0306122     |
| chr28          | 10676947 | 2 | 316 | TCTGTTTTTGCC:0.924051         | T:              |
| 0.0759494      |          |   |     |                               |                 |
| chr28          | 10677728 | 2 | 278 | C:0.964029                    | T:0.0359712     |
| chr28          | 10677902 | 2 | 306 | T:0.647059                    | C:0.352941      |
| chr28          | 10682717 | 2 | 296 | A:0.969595                    | AC:0.0304054    |
| chr28          | 10685522 | 2 | 292 | C:0.671233                    | T:0.328767      |
| chr28          | 10686538 | 2 | 300 | G:0.996667                    | A:0.00333333    |
| chr28          | 10689002 | 2 | 316 | CTATCATT:0                    | C:1             |
| chr28          | 10689011 | 2 | 316 | CAACACCAGAAATACTTGTACAAGCTT:0 |                 |
| C:1            |          |   |     |                               |                 |
| chr28          | 10689041 | 2 | 316 | CAAAG:0                       | C:1             |
| chr28          | 10689052 | 2 | 316 | TGTAGTCTGTCTAC:0              | T:1             |
| chr28          | 10689067 | 2 | 316 | AAATTTCTGACATCAG:0            | A:1             |
| chr28          | 10689084 | 2 | 316 | CCCAAAGGAGAA:0                | C:1             |
| chr28          | 10689096 | 2 | 316 | T:0                           | TTG:1           |

|       |          |   |     |                      |                |
|-------|----------|---|-----|----------------------|----------------|
| chr28 | 10690263 | 2 | 300 | C:0.996667           | T:0.00333333   |
| chr28 | 10690732 | 2 | 296 | T:0.918919           | A:0.0810811    |
| chr28 | 10691590 | 2 | 286 | C:0.968531           | A:0.0314685    |
| chr28 | 10692902 | 2 | 312 | A:0.628205           | G:0.371795     |
| chr28 | 10692987 | 2 | 298 | T:0.654362           | C:0.345638     |
| chr28 | 10693211 | 2 | 242 | G:0.632231           | GA:0.367769    |
| chr28 | 10694061 | 2 | 306 | T:0.647059           | C:0.352941     |
| chr28 | 10694176 | 2 | 304 | G:0.838816           | A:0.161184     |
| chr28 | 10694780 | 2 | 280 | T:0.610714           | C:0.389286     |
| chr28 | 10694786 | 2 | 284 | C:0.961268           | T:0.0387324    |
| chr28 | 10696593 | 2 | 304 | G:0.638158           | A:0.361842     |
| chr28 | 10696929 | 2 | 308 | T:0.983766           | C:0.0162338    |
| chr28 | 10696974 | 2 | 300 | C:0.99               | T:0.01         |
| chr28 | 10697088 | 2 | 304 | C:0.967105           | T:0.0328947    |
| chr28 | 10698154 | 2 | 276 | G:0.626812           | A:0.373188     |
| chr28 | 10698493 | 2 | 284 | C:0.489437           | CT:0.510563    |
| chr28 | 10699540 | 2 | 298 | CCTCT:0.92953        | C:0.0704698    |
| chr28 | 10699735 | 2 | 294 | A:0.629252           | G:0.370748     |
| chr28 | 10699869 | 2 | 312 | T:0.628205           | C:0.371795     |
| chr28 | 10700188 | 2 | 302 | T:0.645695           | A:0.354305     |
| chr28 | 10700658 | 2 | 294 | G:0.622449           | T:0.377551     |
| chr28 | 10701197 | 2 | 280 | AG:0.685714          | A:0.314286     |
| chr28 | 10701214 | 2 | 290 | A:0.689655           | G:0.310345     |
| chr28 | 10701258 | 2 | 300 | A:0.99               | G:0.01         |
| chr28 | 10701341 | 2 | 290 | T:0.672414           | A:0.327586     |
| chr28 | 10701625 | 2 | 296 | A:0.655405           | G:0.344595     |
| chr28 | 10702509 | 2 | 312 | CTTTCTTTTCT:0.660256 | C:             |
|       | 0.339744 |   |     |                      |                |
| chr28 | 10702592 | 2 | 304 | G:0.651316           | GACAC:0.348684 |
| chr28 | 10702654 | 2 | 288 | T:0.621528           | C:0.378472     |
| chr28 | 10703393 | 2 | 306 | A:0.627451           | G:0.372549     |
| chr28 | 10703679 | 2 | 302 | C:0.956954           | T:0.0430464    |
| chr28 | 10703918 | 2 | 308 | C:0.987013           | T:0.012987     |
| chr28 | 10704612 | 2 | 302 | CT:0.612583          | C:0.387417     |
| chr28 | 10705081 | 2 | 292 | G:0.660959           | A:0.339041     |
| chr28 | 10705509 | 2 | 306 | A:0.640523           | T:0.359477     |
| chr28 | 10705881 | 2 | 310 | T:0.880645           | TA:0.119355    |
| chr28 | 10706231 | 2 | 302 | A:0.65894            | AT:0.34106     |
| chr28 | 10706893 | 2 | 310 | C:0.664516           | T:0.335484     |
| chr28 | 10707391 | 2 | 302 | C:0.649007           | CAGAG:0.350993 |
| chr28 | 10707514 | 2 | 286 | T:0.632867           | C:0.367133     |
| chr28 | 10707996 | 2 | 302 | G:0.678808           | C:0.321192     |
| chr28 | 10708030 | 2 | 302 | G:0.668874           | GA:0.331126    |
| chr28 | 10708233 | 2 | 298 | C:0.667785           | T:0.332215     |
| chr28 | 10708260 | 2 | 310 | T:0.658065           | G:0.341935     |
| chr28 | 10708964 | 2 | 308 | A:0.655844           | G:0.344156     |
| chr28 | 10709326 | 2 | 300 | A:0.673333           | G:0.326667     |
| chr28 | 10709441 | 2 | 300 | C:0.676667           | T:0.323333     |
| chr28 | 10710218 | 2 | 238 | ATT:0.621849         | A:0.378151     |
| chr28 | 10710293 | 2 | 292 | A:0.650685           | T:0.349315     |
| chr28 | 10710621 | 2 | 282 | A:0                  | G:1            |
| chr28 | 10710791 | 2 | 298 | GAC:0.701342         | G:0.298658     |
| chr28 | 10711014 | 2 | 310 | T:0.677419           | C:0.322581     |
| chr28 | 10711234 | 3 | 272 | AT:0.591912          | A:0.0919118    |

ATT:0.316176  
 chr28 10711887 2 300 C:0.636667 T:0.363333  
 chr28 10712016 2 314 T:0.678344 C:0.321656  
 chr28 10712106 2 306 T:0.977124 G:0.0228758  
 chr28 10712617 2 288 AT:0.232639 A:0.767361  
 chr28 10712647 2 272 C:0.6875 CAG:0.3125  
 chr28 10713398 2 300 G:0.656667 A:0.343333  
 chr28 10713453 2 290 A:0.982759 G:0.0172414  
 chr28 10713526 2 276 G:0.981884 C:0.0181159  
 chr28 10713788 2 304 ATCACC:0.674342 A:0.325658  
 chr28 10713889 2 304 T:0.664474 A:0.335526  
 chr28 10714028 2 308 T:0.941558 C:0.0584416  
 chr28 10714302 2 300 T:0.643333 G:0.356667  
 chr28 10714438 2 314 C:0.656051 T:0.343949  
 chr28 10715462 2 290 C:0.668966 A:0.331034  
 chr28 10716192 2 200 C:0.685 CT:0.315  
 chr28 10716452 2 252 T:0.630952 C:0.369048  
 chr28 10716626 3 260 T:0.626923 TA:0.180769  
 TAA:0.192308  
 chr28 10717050 2 302 G:0.953642 A:0.0463576  
 chr28 10717141 2 288 C:0.979167 A:0.0208333  
 chr28 10717190 3 292 GA:0.613014 G:0.0856164  
 GAA:0.30137  
 chr28 10717334 2 288 C:0.659722 G:0.340278  
 chr28 10717644 2 296 T:0.155405 G:0.844595  
 chr28 10717691 2 294 A:0.989796 G:0.0102041  
 chr28 10717743 2 270 TA:0.677778 T:0.322222  
 chr28 10717873 2 288 T:0.677083 C:0.322917  
 chr28 10719409 2 288 G:0.722222 A:0.277778  
 chr28 10719846 2 280 G:0.996429 T:0.00357143  
 chr28 10719852 2 264 TC:0.674242 T:0.325758  
 chr28 10719870 2 276 A:0.869565 C:0.130435  
 chr28 10721042 2 286 T:0.727273 C:0.272727  
 chr28 10721098 2 294 T:0.945578 C:0.0544218  
 chr28 10722029 2 312 AAGC:0.958333 A:0.0416667  
 chr28 10722105 2 278 C:0.636691 CTT:0.363309  
 chr28 10722278 2 306 A:0.689542 G:0.310458  
 chr28 10722378 2 308 T:0.720779 G:0.279221  
 chr28 10722820 2 304 G:0.680921 T:0.319079  
 chr28 10723336 2 308 A:0.665584 T:0.334416  
 chr28 10723380 2 302 G:0.65894 A:0.34106  
 chr28 10723459 2 172 ATT:0.901163 A:0.0988372  
 chr28 10723462 2 180 T:0.955556 TA:0.0444444  
 chr28 10723470 2 186 T:0.983871 A:0.016129  
 chr28 10723992 2 310 CCTCTCT:0.693548 C:0.306452  
 chr28 10724046 2 308 AG:0.75974 A:0.24026  
 chr28 10724099 2 310 A:0.664516 G:0.335484  
 chr28 10724369 2 312 A:0.679487 C:0.320513  
 chr28 10724901 2 306 A:0.683007 G:0.316993  
 chr28 10725057 2 302 CT:0.738411 C:0.261589  
 chr28 10725067 2 284 TTTTTTTC:0.774648 T:  
 0.225352  
 chr28 10725068 2 284 TTTTTTTC:0.901408 T:  
 0.0985915



|       |                 |     |                  |                 |
|-------|-----------------|-----|------------------|-----------------|
| chr28 | 10725642 3      | 278 | CTTT:0.557554    | C:0.338129      |
|       | CTTT:0.104317   |     |                  |                 |
| chr28 | 10725688 2      | 270 | CAG:0.655556     | C:0.344444      |
| chr28 | 10725754 2      | 292 | G:0.986301       | A:0.0136986     |
| chr28 | 10726592 2      | 312 | T:0.679487       | C:0.320513      |
| chr28 | 10727319 2      | 264 | CA:0.69697       | C:0.30303       |
| chr28 | 10727335 2      | 264 | G:0.655303       | GTA:0.344697    |
| chr28 | 10727645 2      | 312 | C:0.689103       | A:0.310897      |
| chr28 | 10728488 2      | 308 | G:0.672078       | A:0.327922      |
| chr28 | 10728500 2      | 292 | GT:0.715753      | G:0.284247      |
| chr28 | 10730049 2      | 308 | C:0.681818       | T:0.318182      |
| chr28 | 10730584 2      | 302 | A:0.68543        | C:0.31457       |
| chr28 | 10731280 2      | 316 | T:0.689873       | C:0.310127      |
| chr28 | 10731398 2      | 304 | A:0.684211       | G:0.315789      |
| chr28 | 10732073 2      | 300 | C:0.673333       | T:0.326667      |
| chr28 | 10732241 2      | 304 | T:0.684211       | TAAATC:0.315789 |
| chr28 | 10732717 2      | 292 | G:0.678082       | GA:0.321918     |
| chr28 | 10733060 2      | 300 | A:0.596667       | T:0.403333      |
| chr28 | 10733105 2      | 308 | A:0.675325       | G:0.324675      |
| chr28 | 10733286 2      | 268 | A:0.80597        | G:0.19403       |
| chr28 | 10733508 2      | 302 | C:0.678808       | T:0.321192      |
| chr28 | 10733562 2      | 230 | CTT:0.7 C:0.3    |                 |
| chr28 | 10733613 2      | 208 | C:0.706731       | CAG:0.293269    |
| chr28 | 10733971 2      | 290 | AT:0.775862      | A:0.224138      |
| chr28 | 10733972 2      | 288 | T:0.913194       | A:0.0868056     |
| chr28 | 10733977 2      | 292 | A:0.688356       | T:0.311644      |
| chr28 | 10734120 2      | 244 | A:0.704918       | G:0.295082      |
| chr28 | 10734164 2      | 266 | A:0.725564       | G:0.274436      |
| chr28 | 10734177 2      | 278 | T:0.78777        | TA:0.21223      |
| chr28 | 10734403 2      | 294 | AAAGGC:0.938776  | A:0.0612245     |
| chr28 | 10734434 2      | 286 | G:0.972028       | A:0.027972      |
| chr28 | 10734596 2      | 294 | G:0.663265       | A:0.336735      |
| chr28 | 10735011 2      | 300 | T:0.686667       | C:0.313333      |
| chr28 | 10735131 2      | 310 | G:0.674194       | A:0.325806      |
| chr28 | 10735165 2      | 300 | CT:0.693333      | C:0.306667      |
| chr28 | 10735204 3      | 306 | C:0.764706       | CAG:0.0392157   |
|       | CAGAG:0.196078  |     |                  |                 |
| chr28 | 10735206 3      | 306 | C:0.640523       | G:0.29085       |
|       | CAGAG:0.0686275 |     |                  |                 |
| chr28 | 10735781 2      | 294 | A:0.92517        | T:0.0748299     |
| chr28 | 10736087 2      | 306 | C:0.96732        | T:0.0326797     |
| chr28 | 10737303 2      | 312 | G:0.987179       | C:0.0128205     |
| chr28 | 10737520 2      | 314 | A:0.652866       | G:0.347134      |
| chr28 | 10739199 2      | 276 | G:0.880435       | A:0.119565      |
| chr28 | 10739353 2      | 286 | G:0.870629       | A:0.129371      |
| chr28 | 10739553 3      | 282 | AG:0.797872      | A:0.134752      |
|       | AGG:0.0673759   |     |                  |                 |
| chr28 | 10739597 2      | 268 | C:0.776119       | T:0.223881      |
| chr28 | 10740077 2      | 306 | C:0.872549       | T:0.127451      |
| chr28 | 10740145 2      | 296 | C:0.915541       | CA:0.0844595    |
| chr28 | 10740147 2      | 280 | A:0.539286       | AT:0.460714     |
| chr28 | 10740404 3      | 298 | C:0.734899       | CT:0.147651     |
|       | CTT:0.11745     |     |                  |                 |
| chr28 | 10740445 3      | 306 | CAGAGAG:0.683007 | C:0.160131      |

CAGAG:0.156863

|                      |            |     |                 |                 |
|----------------------|------------|-----|-----------------|-----------------|
| chr28                | 10740947 2 | 306 | T:0.875817      | C:0.124183      |
| chr28                | 10741145 2 | 310 | T:0.964516      | G:0.0354839     |
| chr28                | 10741571 2 | 294 | T:0.884354      | C:0.115646      |
| chr28                | 10741822 2 | 312 | G:0.980769      | A:0.0192308     |
| chr28                | 10742324 2 | 308 | T:0.876623      | C:0.123377      |
| chr28                | 10742707 2 | 300 | C:0.89 CT:0.11  |                 |
| chr28                | 10742710 2 | 298 | T:0.895973      | TAA:0.104027    |
| chr28                | 10743089 2 | 298 | C:0.942953      | T:0.057047      |
| chr28                | 10743465 2 | 298 | C:0.969799      | T:0.0302013     |
| chr28                | 10744059 2 | 302 | G:0.884106      | C:0.115894      |
| chr28                | 10744615 2 | 304 | T:0.773026      | C:0.226974      |
| chr28                | 10744908 2 | 308 | G:0.987013      | A:0.012987      |
| chr28                | 10745602 2 | 290 | T:0.996552      | C:0.00344828    |
| chr28                | 10746348 2 | 298 | T:0.879195      | C:0.120805      |
| chr28                | 10746405 2 | 294 | C:0.897959      | T:0.102041      |
| chr28                | 10746557 2 | 308 | T:0.983766      | G:0.0162338     |
| chr28                | 10747138 2 | 310 | C:0.967742      | T:0.0322581     |
| chr28                | 10747901 2 | 294 | A:0.673469      | AAAG:0.326531   |
| chr28                | 10748051 2 | 294 | G:0.901361      | A:0.0986395     |
| chr28                | 10748086 2 | 292 | A:0.777397      | G:0.222603      |
| chr28                | 10748125 2 | 298 | G:0.909396      | T:0.090604      |
| chr28                | 10748217 2 | 238 | TA:0.57563      | T:0.42437       |
| chr28                | 10748235 2 | 300 | A:0.886667      | T:0.113333      |
| chr28                | 10748238 2 | 300 | A:0.886667      | G:0.113333      |
| chr28                | 10748313 2 | 306 | TCCTG:0.941176  | T:0.0588235     |
| chr28                | 10748702 2 | 296 | C:0.983108      | T:0.0168919     |
| chr28                | 10748721 2 | 292 | C:0.873288      | T:0.126712      |
| chr28                | 10750001 2 | 314 | A:0.799363      | G:0.200637      |
| chr28                | 10750349 2 | 302 | T:0.549669      | C:0.450331      |
| chr28                | 10750796 2 | 284 | AG:0.862676     | A:0.137324      |
| chr28                | 10750958 2 | 272 | C:0.893382      | G:0.106618      |
| chr28                | 10750978 3 | 286 | TAAA:0.716783   | T:0.0804196     |
| TAAAA:0.202797       |            |     |                 |                 |
| chr28                | 10751008 2 | 288 | A:0.982639      | G:0.0173611     |
| chr28                | 10751976 2 | 310 | A:0.948387      | G:0.0516129     |
| chr28                | 10752176 2 | 310 | A:0.751613      | G:0.248387      |
| chr28                | 10753060 2 | 290 | CAT:0.906897    | C:0.0931034     |
| chr28                | 10753191 4 | 318 | AAAAAC:0.443396 | A:0.0566038     |
| AAAAACAAAAC:0.446541 |            |     |                 |                 |
| chr28                | 10753229 3 | 318 | A:0.902516      | C:0.0880503     |
| AACAAAC:0.00943396   |            |     |                 |                 |
| chr28                | 10753234 2 | 314 | C:0.773885      | CAAAA:0.226115  |
| chr28                | 10753435 2 | 300 | C:0.873333      | A:0.126667      |
| chr28                | 10753754 2 | 300 | G:0.893333      | A:0.106667      |
| chr28                | 10755296 2 | 308 | T:0.951299      | C:0.0487013     |
| chr28                | 10755601 2 | 304 | A:0.868421      | C:0.131579      |
| chr28                | 10756021 2 | 298 | A:0.88255       | G:0.11745       |
| chr28                | 10756752 2 | 304 | AAAAC:0.776316  | A:0.223684      |
| chr28                | 10757820 2 | 302 | T:0.903974      | C:0.0960265     |
| chr28                | 10758996 2 | 300 | G:0.846667      | A:0.153333      |
| chr28                | 10760078 2 | 308 | A:0.785714      | AT:0.214286     |
| chr28                | 10760230 2 | 310 | T:0.874194      | C:0.125806      |
| chr28                | 10761064 2 | 308 | A:0.772727      | ATAGTT:0.227273 |

|                                 |            |     |                 |                 |
|---------------------------------|------------|-----|-----------------|-----------------|
| chr28                           | 10761196 3 | 288 | CA:0.4375       | C:0.409722      |
| CAA:0.152778                    |            |     |                 |                 |
| chr28                           | 10761567 2 | 316 | A:0.743671      |                 |
| ACAGCTATTTTTGTGTCTG:0.256329    |            |     |                 |                 |
| chr28                           | 10761664 2 | 294 | C:0.928571      | T:0.0714286     |
| chr28                           | 10761718 2 | 312 | T:0.990385      | C:0.00961538    |
| chr28                           | 10761997 2 | 294 | AT:0.887755     | A:0.112245      |
| chr28                           | 10762095 2 | 276 | C:0.898551      | T:0.101449      |
| chr28                           | 10762286 4 | 286 | TAAAA:0.465035  | T:0.118881      |
| TAA:0.157343 TAAA:0.258741      |            |     |                 |                 |
| chr28                           | 10762464 2 | 296 | T:0.885135      | TATGTC:0.114865 |
| chr28                           | 10762491 2 | 296 | G:0.976351      | C:0.0236486     |
| chr28                           | 10762522 2 | 304 | T:0.888158      | C:0.111842      |
| chr28                           | 10763694 2 | 296 | G:0.966216      | A:0.0337838     |
| chr28                           | 10763987 4 | 316 | CAGAG:0.53481   | C:0.117089      |
| CAG:0.234177 CAGAGAG:0.113924   |            |     |                 |                 |
| chr28                           | 10764143 2 | 300 | T:0.76 C:0.24   |                 |
| chr28                           | 10764367 2 | 300 | C:0.886667      | T:0.113333      |
| chr28                           | 10764591 2 | 314 | T:0.754777      | C:0.245223      |
| chr28                           | 10765710 2 | 298 | A:0.781879      | C:0.218121      |
| chr28                           | 10765969 2 | 306 | T:0.970588      | C:0.0294118     |
| chr28                           | 10766709 4 | 298 | TAG:0.261745    | T:0.251678      |
| TAGAG:0.342282 TAGAGAG:0.144295 |            |     |                 |                 |
| chr28                           | 10766801 2 | 274 | C:0.857664      | T:0.142336      |
| chr28                           | 10767588 2 | 300 | A:0.956667      | G:0.0433333     |
| chr28                           | 10767617 2 | 302 | CACA:0.980132   | C:0.0198675     |
| chr28                           | 10767623 2 | 304 | G:0.875 T:0.125 |                 |
| chr28                           | 10767629 2 | 304 | C:0.875 A:0.125 |                 |
| chr28                           | 10768234 2 | 298 | G:0.889262      | GT:0.110738     |
| chr28                           | 10768246 2 | 300 | T:0.786667      | A:0.213333      |
| chr28                           | 10768247 2 | 300 | A:0.75 T:0.25   |                 |
| chr28                           | 10769125 2 | 314 | AATGT:0.936306  | A:0.0636943     |
| chr28                           | 10769156 2 | 304 | C:0.756579      | A:0.243421      |
| chr28                           | 10769679 2 | 302 | T:0.877483      | C:0.122517      |
| chr28                           | 10769736 2 | 308 | A:0.883117      | G:0.116883      |
| chr28                           | 10770443 2 | 296 | G:0.989865      | C:0.0101351     |
| chr28                           | 10770945 2 | 302 | A:0.761589      | G:0.238411      |
| chr28                           | 10771080 2 | 306 | A:0.751634      | ACT:0.248366    |
| chr28                           | 10772205 2 | 302 | TA:0.781457     | T:0.218543      |
| chr28                           | 10772387 3 | 270 | ATT:0.703704    | A:0.148148      |
| AT:0.148148                     |            |     |                 |                 |
| chr28                           | 10772437 2 | 252 | CAG:0.940476    | C:0.0595238     |
| chr28                           | 10772439 2 | 264 | G:0.962121      | C:0.0378788     |
| chr28                           | 10772859 2 | 302 | C:0.748344      | T:0.251656      |
| chr28                           | 10772884 2 | 306 | TA:0.852941     | T:0.147059      |
| chr28                           | 10773090 2 | 304 | T:0.707237      | C:0.292763      |
| chr28                           | 10773296 2 | 280 | C:0.939286      | T:0.0607143     |
| chr28                           | 10773321 2 | 268 | C:0.794776      | CT:0.205224     |
| chr28                           | 10774112 2 | 306 | CTA:0.879085    | C:0.120915      |
| chr28                           | 10774172 3 | 308 | AAAAC:0.75      | A:0.123377      |
| AAAACAAAC:0.126623              |            |     |                 |                 |
| chr28                           | 10774615 2 | 302 | G:0.890728      | A:0.109272      |
| chr28                           | 10774791 2 | 314 | G:0.869427      | A:0.130573      |
| chr28                           | 10774957 2 | 300 | A:0.873333      | C:0.126667      |

|              |          |   |     |                      |                  |
|--------------|----------|---|-----|----------------------|------------------|
| chr28        | 10775164 | 2 | 306 | G:0.761438           | A:0.238562       |
| chr28        | 10776442 | 2 | 304 | T:0.782895           | C:0.217105       |
| chr28        | 10776469 | 2 | 306 | AT:0.986928          | A:0.0130719      |
| chr28        | 10776941 | 2 | 294 | A:0.921769           | T:0.0782313      |
| chr28        | 10777379 | 2 | 298 | C:0.95302            | T:0.0469799      |
| chr28        | 10777681 | 2 | 294 | A:0.92517            | AAAAAG:0.0748299 |
| chr28        | 10777772 | 2 | 306 | C:0.856209           | T:0.143791       |
| chr28        | 10777871 | 2 | 304 | T:0.763158           | A:0.236842       |
| chr28        | 10778270 | 2 | 292 | GA:0.938356          | G:0.0616438      |
| chr28        | 10778309 | 2 | 304 | C:0.766447           | T:0.233553       |
| chr28        | 10778666 | 2 | 302 | C:0.890728           | T:0.109272       |
| chr28        | 10779001 | 2 | 296 | C:0.871622           | T:0.128378       |
| chr28        | 10779043 | 2 | 304 | C:0.878289           | T:0.121711       |
| chr28        | 10779220 | 2 | 292 | C:0.962329           | CT:0.0376712     |
| chr28        | 10779294 | 2 | 292 | C:0.876712           | T:0.123288       |
| chr28        | 10779582 | 2 | 306 | G:0.885621           | T:0.114379       |
| chr28        | 10779588 | 2 | 308 | G:0.983766           | T:0.0162338      |
| chr28        | 10780909 | 2 | 300 | TA:0.95 T:0.05       |                  |
| chr28        | 10780910 | 3 | 300 | ATT:0.786667         | A:0.116667       |
| AT:0.0966667 |          |   |     |                      |                  |
| chr28        | 10781368 | 2 | 306 | C:0.98366            | T:0.0163399      |
| chr28        | 10781582 | 2 | 288 | TTC:0.947917         | T:0.0520833      |
| chr28        | 10781588 | 2 | 300 | T:0.99 C:0.01        |                  |
| chr28        | 10782031 | 2 | 284 | C:0.75 T:0.25        |                  |
| chr28        | 10782115 | 2 | 258 | T:0.883721           | TA:0.116279      |
| chr28        | 10782176 | 2 | 276 | T:0.731884           | TCTG:0.268116    |
| chr28        | 10782912 | 2 | 284 | A:0.746479           | G:0.253521       |
| chr28        | 10783073 | 2 | 252 | T:0.876984           | TA:0.123016      |
| chr28        | 10783138 | 2 | 172 | G:0.860465           | A:0.139535       |
| chr28        | 10783392 | 2 | 214 | G:0.873832           | GC:0.126168      |
| chr28        | 10783837 | 2 | 264 | C:0.833333           | T:0.166667       |
| chr28        | 10784018 | 2 | 208 | G:0.9375 T:0.0625    |                  |
| chr28        | 10784077 | 2 | 170 | G:0.888235           | C:0.111765       |
| chr28        | 10785442 | 2 | 266 | G:0.954887           | A:0.0451128      |
| chr28        | 10786021 | 2 | 282 | G:0.843972           | A:0.156028       |
| chr28        | 10786049 | 2 | 304 | T:0.967105           | G:0.0328947      |
| chr28        | 10786062 | 2 | 304 | G:0.753289           | T:0.246711       |
| chr28        | 10786076 | 2 | 302 | G:0 T:1              |                  |
| chr28        | 10786136 | 2 | 304 | C:0 G:1              |                  |
| chr28        | 10786220 | 2 | 296 | T:0.956081           | C:0.0439189      |
| chr28        | 10786342 | 2 | 304 | G:0.891447           | A:0.108553       |
| chr28        | 10786343 | 2 | 304 | G:0.960526           | A:0.0394737      |
| chr28        | 10786477 | 2 | 306 | G:0.954248           | T:0.0457516      |
| chr28        | 10786561 | 2 | 302 | C:0.834437           | T:0.165563       |
| chr28        | 10786564 | 2 | 302 | G:0.960265           | T:0.0397351      |
| chr28        | 10786946 | 2 | 310 | G:0.977419           | A:0.0225806      |
| chr28        | 10787158 | 2 | 306 | T:0.96732            | C:0.0326797      |
| chr28        | 10787239 | 2 | 296 | CTTTCT:0.297297      | C:0.702703       |
| chr28        | 10787349 | 2 | 196 | G:0.331633           | T:0.668367       |
| chr28        | 10787915 | 2 | 306 | GC:0 G:1             |                  |
| chr28        | 10788645 | 2 | 298 | C:0 G:1              |                  |
| chr28        | 10788875 | 2 | 316 | AGCATCCTGCC:0.936709 | A:               |
| 0.0632911    |          |   |     |                      |                  |
| chr28        | 10788888 | 2 | 316 | A:0.89557            | G:0.10443        |

|                                 |            |     |                      |                 |
|---------------------------------|------------|-----|----------------------|-----------------|
| chr28                           | 10789147 2 | 312 | C:0.990385           | T:0.00961538    |
| chr28                           | 10789640 2 | 310 | CA:0.951613          | C:0.0483871     |
| chr28                           | 10789643 2 | 310 | TGGGC:0.951613       | T:0.0483871     |
| chr28                           | 10789652 2 | 310 | C:0.951613           | T:0.0483871     |
| chr28                           | 10789771 2 | 302 | G:0.725166           | A:0.274834      |
| chr28                           | 10789774 2 | 302 | G:0.97351            | A:0.0264901     |
| chr28                           | 10790103 2 | 310 | T:0.696774           | C:0.303226      |
| chr28                           | 10790171 2 | 290 | C:0.962069           | T:0.037931      |
| chr28                           | 10790236 3 | 314 | A:0.694268           | AGATG:0.11465   |
| AGATGGATG:0.191083              |            |     |                      |                 |
| chr28                           | 10790365 2 | 296 | ATTT:0.847973        | A:0.152027      |
| chr28                           | 10790372 2 | 314 | T:0.984076           | TA:0.0159236    |
| chr28                           | 10790396 2 | 290 | G:0.97931            | A:0.0206897     |
| chr28                           | 10790601 2 | 302 | G:0.831126           | C:0.168874      |
| chr28                           | 10790641 2 | 302 | G:0.937086           | A:0.0629139     |
| chr28                           | 10790672 2 | 304 | G:0.970395           | A:0.0296053     |
| chr28                           | 10791027 2 | 306 | A:0.826797           | G:0.173203      |
| chr28                           | 10791097 2 | 300 | A:0.96 G:0.04        |                 |
| chr28                           | 10791288 2 | 278 | G:0.938849           | GTGCTAGAGC:     |
| 0.0611511                       |            |     |                      |                 |
| chr28                           | 10791360 2 | 146 | T:0.246575           | C:0.753425      |
| chr28                           | 10791635 2 | 312 | TAAAAAAA:0.964744    | T:              |
| 0.0352564                       |            |     |                      |                 |
| chr28                           | 10791636 2 | 308 | A:0.987013           | T:0.012987      |
| chr28                           | 10791651 2 | 312 | A:0.964744           | T:0.0352564     |
| chr28                           | 10791925 2 | 316 | CT:0.306962          | C:0.693038      |
| chr28                           | 10791931 2 | 316 | A:0.882911           | T:0.117089      |
| chr28                           | 10792362 2 | 302 | G:0.960265           | A:0.0397351     |
| chr28                           | 10792475 2 | 290 | C:0.127586           | T:0.872414      |
| chr28                           | 10792513 2 | 288 | G:0.986111           | A:0.0138889     |
| chr28                           | 10792605 2 | 298 | C:0.95302            | CATGA:0.0469799 |
| chr28                           | 10792682 2 | 306 | G:0.957516           | A:0.0424837     |
| chr28                           | 10792694 4 | 318 | GCACA:0.18239        | G:0.0943396     |
| GCA:0.606918 GCACACACA:0.116352 |            |     |                      |                 |
| chr28                           | 10792696 2 | 316 | A:0.981013           | G:0.0189873     |
| chr28                           | 10792698 2 | 312 | A:0.964744           | G:0.0352564     |
| chr28                           | 10792700 2 | 308 | A:0.983766           | G:0.0162338     |
| chr28                           | 10792702 2 | 308 | A:0.983766           | G:0.0162338     |
| chr28                           | 10792912 2 | 306 | C:0.300654           | A:0.699346      |
| chr28                           | 10792915 2 | 308 | GT:0.967532          | G:0.0324675     |
| chr28                           | 10793232 2 | 304 | G:0.986842           | A:0.0131579     |
| chr28                           | 10793344 2 | 294 | G:0.717687           | GA:0.282313     |
| chr28                           | 10793715 2 | 284 | A:0.235915           | C:0.764085      |
| chr28                           | 10793717 2 | 282 | A:0.929078           | C:0.070922      |
| chr28                           | 10793778 2 | 296 | A:0.989865           | G:0.0101351     |
| chr28                           | 10794281 2 | 304 | C:0.292763           | T:0.707237      |
| chr28                           | 10794711 2 | 304 | ACCC:0.983553        | A:0.0164474     |
| chr28                           | 10794779 2 | 300 | C:0.973333           | T:0.0266667     |
| chr28                           | 10796986 2 | 292 | A:0.263699           | G:0.736301      |
| chr28                           | 10797230 2 | 300 | A:0.303333           | G:0.696667      |
| chr28                           | 10797858 2 | 312 | AGGGTTGGGGC:0.301282 | A:              |
| 0.698718                        |            |     |                      |                 |
| chr28                           | 10798030 2 | 298 | T:0.221477           | C:0.778523      |
| chr28                           | 10798522 2 | 306 | G:0.316993           | A:0.683007      |

|                                |            |     |                                 |                   |
|--------------------------------|------------|-----|---------------------------------|-------------------|
| chr28                          | 10798608 2 | 304 | A:0.105263                      | C:0.894737        |
| chr28                          | 10798699 2 | 280 | C:0.971429                      | T:0.0285714       |
| chr28                          | 10798759 2 | 296 | T:0.692568                      | C:0.307432        |
| chr28                          | 10798910 2 | 290 | TG:0.331034                     | T:0.668966        |
| chr28                          | 10798916 2 | 290 | GCACC:0.693103                  | G:0.306897        |
| chr28                          | 10798919 2 | 290 | C:0.331034                      | CA:0.668966       |
| chr28                          | 10799285 2 | 284 | C:0.278169                      | A:0.721831        |
| chr28                          | 10799467 2 | 284 | C:0.299296                      | T:0.700704        |
| chr28                          | 10799500 2 | 282 | T:0.322695                      | C:0.677305        |
| chr28                          | 10799935 2 | 296 | T:0.692568                      | G:0.307432        |
| chr28                          | 10800458 2 | 306 | C:0.960784                      | T:0.0392157       |
| chr28                          | 10800816 2 | 302 | T:0.986755                      | TAA:0.013245      |
| chr28                          | 10800817 2 | 302 | GCT:0.986755                    | G:0.013245        |
| chr28                          | 10800836 2 | 296 | G:0.753378                      | A:0.246622        |
| chr28                          | 10801389 2 | 312 | G:0.958333                      | T:0.0416667       |
| chr28                          | 10801683 2 | 306 | G:0.284314                      | A:0.715686        |
| chr28                          | 10801900 2 | 304 | G:0.703947                      | A:0.296053        |
| chr28                          | 10802217 2 | 302 | AAGAG:0.745033                  | A:0.254967        |
| chr28                          | 10802229 2 | 304 | G:0.9375 A:0.0625               |                   |
| chr28                          | 10803019 2 | 304 | C:0.986842                      | T:0.0131579       |
| chr28                          | 10803956 2 | 306 | T:0.986928                      | G:0.0130719       |
| chr28                          | 10804116 2 | 300 | G:0.716667                      | A:0.283333        |
| chr28                          | 10804198 2 | 286 | CTG:0.699301                    | C:0.300699        |
| chr28                          | 10804280 2 | 302 | TA:0.748344                     | T:0.251656        |
| chr28                          | 10805161 2 | 300 | A:0.71 G:0.29                   |                   |
| chr28                          | 10805332 2 | 316 | T:0.962025                      | TG:0.0379747      |
| chr28                          | 10805334 2 | 316 | A:0.962025                      |                   |
| AGACAAAAGAAGGAGACAGC:0.0379747 |            |     |                                 |                   |
| chr28                          | 10805337 2 | 316 | GCTCTCTC:0.962025               | G:                |
| 0.0379747                      |            |     |                                 |                   |
| chr28                          | 10805458 2 | 308 | G:0.756494                      | A:0.243506        |
| chr28                          | 10805484 2 | 306 | C:0.986928                      | T:0.0130719       |
| chr28                          | 10805708 2 | 308 | A:0.311688                      | T:0.688312        |
| chr28                          | 10805938 2 | 262 | C:0.984733                      | T:0.0152672       |
| chr28                          | 10806164 2 | 258 | T:0.697674                      | C:0.302326        |
| chr28                          | 10807229 2 | 302 | A:0.986755                      | G:0.013245        |
| chr28                          | 10807334 2 | 302 | G:0.708609                      | A:0.291391        |
| chr28                          | 10807952 2 | 308 | CT:0.967532                     | C:0.0324675       |
| chr28                          | 10808716 2 | 304 | G:0.203947                      | T:0.796053        |
| chr28                          | 10808723 2 | 294 | C:0.418367                      | CTCTT:0.581633    |
| chr28                          | 10808727 2 | 310 | T:0.951613                      | TTCTTTC:0.0483871 |
| chr28                          | 10808788 2 | 300 | G:0.956667                      | A:0.0433333       |
| chr28                          | 10810294 2 | 320 | G:0.825 GAAAAAAAAAAAAAAAAAAAAA: |                   |
| 0.175                          |            |     |                                 |                   |
| chr28                          | 10810296 2 | 320 | A:0.790625                      | AAAATCTGATGAGGT:  |
| 0.209375                       |            |     |                                 |                   |
| chr28                          | 10810503 2 | 296 | G:0.709459                      | A:0.290541        |
| chr28                          | 10810518 2 | 290 | G:0.72069                       | T:0.27931         |
| chr28                          | 10810680 2 | 304 | C:0.289474                      | T:0.710526        |
| chr28                          | 10810910 2 | 294 | T:0.292517                      | C:0.707483        |
| chr28                          | 10811208 2 | 308 | GT:0.314935                     | G:0.685065        |
| chr28                          | 10811217 2 | 308 | C:0.314935                      | T:0.685065        |
| chr28                          | 10811295 2 | 304 | G:0.299342                      | C:0.700658        |
| chr28                          | 10811860 2 | 292 | A:0.732877                      | G:0.267123        |

|                                             |          |   |     |                    |              |
|---------------------------------------------|----------|---|-----|--------------------|--------------|
| chr28                                       | 10811995 | 2 | 278 | G:0.708633         | T:0.291367   |
| chr28                                       | 10812105 | 2 | 286 | A:0.944056         | G:0.0559441  |
| chr28                                       | 10812120 | 2 | 288 | G:0.725694         | A:0.274306   |
| chr28                                       | 10812280 | 2 | 294 | T:0.255102         | C:0.744898   |
| chr28                                       | 10812446 | 2 | 294 | C:0.309524         | T:0.690476   |
| chr28                                       | 10812841 | 2 | 298 | G:0.288591         | A:0.711409   |
| chr28                                       | 10812961 | 2 | 312 | A:0.983974         | G:0.0160256  |
| chr28                                       | 10813514 | 2 | 288 | T:0.329861         | A:0.670139   |
| chr28                                       | 10814023 | 2 | 290 | A:0.931034         | G:0.0689655  |
| chr28                                       | 10814099 | 2 | 302 | AT:0.701987        | A:0.298013   |
| chr28                                       | 10814148 | 2 | 306 | C:0.764706         | CT:0.235294  |
| chr28                                       | 10814149 | 2 | 306 | C:0.53268          | T:0.46732    |
| chr28                                       | 10814150 | 3 | 306 | C:0.738562         | T:0.238562   |
| CTT:0.0228758                               |          |   |     |                    |              |
| chr28                                       | 10814876 | 2 | 250 | C:0.192 G:0.808    |              |
| chr28                                       | 10815237 | 2 | 292 | G:0.291096         | A:0.708904   |
| chr28                                       | 10815616 | 2 | 300 | G:0.71 T:0.29      |              |
| chr28                                       | 10815779 | 2 | 288 | CG:0.708333        | C:0.291667   |
| chr28                                       | 10815825 | 4 | 314 | CCTCTCTCT:0.187898 | C:           |
| 0.646497 CCT:0.0191083 CTTCTCTCTCT:0.146497 |          |   |     |                    |              |
| chr28                                       | 10815846 | 2 | 282 | C:0.978723         | G:0.0212766  |
| chr28                                       | 10815848 | 2 | 266 | C:0.255639         | G:0.744361   |
| chr28                                       | 10815896 | 2 | 294 | T:0.319728         | TA:0.680272  |
| chr28                                       | 10816356 | 2 | 300 | A:0.69 G:0.31      |              |
| chr28                                       | 10816447 | 2 | 304 | G:0.947368         | A:0.0526316  |
| chr28                                       | 10816779 | 2 | 284 | G:0.971831         | A:0.028169   |
| chr28                                       | 10816995 | 2 | 296 | G:0.287162         | A:0.712838   |
| chr28                                       | 10817370 | 2 | 296 | A:0.722973         | G:0.277027   |
| chr28                                       | 10817535 | 2 | 290 | G:0.744828         | T:0.255172   |
| chr28                                       | 10818450 | 2 | 298 | A:0.963087         | G:0.0369128  |
| chr28                                       | 10819367 | 2 | 300 | A:0.72 G:0.28      |              |
| chr28                                       | 10819539 | 2 | 302 | T:0.705298         | C:0.294702   |
| chr28                                       | 10819736 | 2 | 294 | C:0.931973         | CG:0.0680272 |
| chr28                                       | 10819935 | 3 | 258 | TA:0.810078        | T:0.108527   |
| TAA:0.0813953                               |          |   |     |                    |              |
| chr28                                       | 10820648 | 2 | 296 | C:0.695946         | T:0.304054   |
| chr28                                       | 10821105 | 2 | 306 | A:0.986928         | G:0.0130719  |
| chr28                                       | 10821281 | 2 | 294 | G:0.29932          | A:0.70068    |
| chr28                                       | 10821414 | 2 | 304 | G:0.904605         | A:0.0953947  |
| chr28                                       | 10821971 | 2 | 302 | C:0.943709         | T:0.0562914  |
| chr28                                       | 10822368 | 2 | 300 | T:0.31 C:0.69      |              |
| chr28                                       | 10822387 | 2 | 308 | C:0.262987         | T:0.737013   |
| chr28                                       | 10823190 | 2 | 304 | T:0.707237         | C:0.292763   |
| chr28                                       | 10823207 | 2 | 294 | T:0.693878         | TA:0.306122  |
| chr28                                       | 10823751 | 2 | 314 | T:0.308917         | A:0.691083   |
| chr28                                       | 10823975 | 2 | 286 | G:0.954545         | A:0.0454545  |
| chr28                                       | 10824004 | 2 | 302 | C:0 A:1            |              |
| chr28                                       | 10824116 | 2 | 298 | T:0.738255         | C:0.261745   |
| chr28                                       | 10824189 | 2 | 300 | G:0.73 A:0.27      |              |
| chr28                                       | 10824896 | 2 | 266 | T:0.778195         | C:0.221805   |
| chr28                                       | 10825145 | 2 | 246 | A:0.703252         | C:0.296748   |
| chr28                                       | 10825361 | 2 | 280 | G:0.878571         | A:0.121429   |
| chr28                                       | 10825928 | 2 | 302 | A:0.986755         | G:0.013245   |
| chr28                                       | 10826445 | 2 | 300 | T:0.28 C:0.72      |              |

|                                        |          |   |     |                    |                   |
|----------------------------------------|----------|---|-----|--------------------|-------------------|
| chr28                                  | 10826488 | 2 | 298 | C:0.765101         | T:0.234899        |
| chr28                                  | 10826717 | 2 | 296 | G:0.233108         | A:0.766892        |
| chr28                                  | 10827088 | 2 | 304 | T:0.233553         | C:0.766447        |
| chr28                                  | 10827157 | 2 | 302 | G:0.261589         | A:0.738411        |
| chr28                                  | 10827382 | 2 | 294 | T:0.244898         | C:0.755102        |
| chr28                                  | 10827768 | 2 | 294 | CATTT:0.744898     | C:0.255102        |
| chr28                                  | 10827809 | 2 | 276 | G:0.981884         | A:0.0181159       |
| chr28                                  | 10828635 | 2 | 310 | T:0.712903         | C:0.287097        |
| chr28                                  | 10829371 | 2 | 310 | G:0.951613         | A:0.0483871       |
| chr28                                  | 10830034 | 2 | 284 | T:0.753521         | TA:0.246479       |
| chr28                                  | 10830214 | 2 | 294 | T:0.77551          | TA:0.22449        |
| chr28                                  | 10830246 | 2 | 284 | G:0.771127         | A:0.228873        |
| chr28                                  | 10830435 | 2 | 288 | A:0.958333         | C:0.0416667       |
| chr28                                  | 10830652 | 2 | 302 | T:0.731788         | C:0.268212        |
| chr28                                  | 10831011 | 2 | 288 | G:0.996528         | A:0.00347222      |
| chr28                                  | 10831614 | 2 | 298 | T:0.993289         | G:0.00671141      |
| chr28                                  | 10831690 | 2 | 300 | G:0.736667         | A:0.263333        |
| chr28                                  | 10832068 | 2 | 302 | C:0.980132         | T:0.0198675       |
| chr28                                  | 10832590 | 2 | 298 | TAAAAA:0.573826    | T:0.426174        |
| chr28                                  | 10833107 | 2 | 296 | C:0.75 A:0.25      |                   |
| chr28                                  | 10833406 | 2 | 298 | G:0.714765         | A:0.285235        |
| chr28                                  | 10833643 | 2 | 294 | A:0.755102         | C:0.244898        |
| chr28                                  | 10833794 | 2 | 306 | G:0.990196         | A:0.00980392      |
| chr28                                  | 10833839 | 3 | 314 | G:0.589172         | GTTCTTTTCTTTTCTT: |
| 0.248408 GTTCTTTTCTTTTCTTTTCTT:0.16242 |          |   |     |                    |                   |
| chr28                                  | 10833871 | 2 | 314 | T:0.920382         | TC:0.0796178      |
| chr28                                  | 10833872 | 2 | 314 | T:0.920382         |                   |
| TTTTCTTTTCTTTTCTTTTC:0.0796178         |          |   |     |                    |                   |
| chr28                                  | 10834198 | 2 | 292 | A:0.743151         | T:0.256849        |
| chr28                                  | 10834480 | 2 | 198 | G:0.979798         | T:0.020202        |
| chr28                                  | 10835886 | 2 | 286 | T:0.79021          | G:0.20979         |
| chr28                                  | 10836669 | 2 | 282 | G:0.223404         | GC:0.776596       |
| chr28                                  | 10837170 | 2 | 288 | G:0.9375 A:0.0625  |                   |
| chr28                                  | 10837946 | 2 | 304 | G:0.868421         | T:0.131579        |
| chr28                                  | 10838357 | 2 | 296 | G:0.699324         | C:0.300676        |
| chr28                                  | 10838463 | 2 | 294 | T:0.887755         | C:0.112245        |
| chr28                                  | 10838727 | 2 | 290 | C:0.703448         | T:0.296552        |
| chr28                                  | 10839018 | 2 | 284 | AG:0.989437        | A:0.0105634       |
| chr28                                  | 10839579 | 2 | 288 | C:0.423611         | T:0.576389        |
| chr28                                  | 10839669 | 2 | 262 | A:0.732824         | G:0.267176        |
| chr28                                  | 10839670 | 2 | 262 | T:0.732824         | G:0.267176        |
| chr28                                  | 10839780 | 3 | 294 | TTAAATAAA:0.394558 | T:                |
| 0.377551 TTAAA:0.227891                |          |   |     |                    |                   |
| chr28                                  | 10840014 | 2 | 278 | G:0.28777          | C:0.71223         |
| chr28                                  | 10840673 | 2 | 306 | G:0.986928         | A:0.0130719       |
| chr28                                  | 10840824 | 2 | 298 | A:0.0771812        | T:0.922819        |
| chr28                                  | 10840924 | 2 | 286 | C:0.954545         | T:0.0454545       |
| chr28                                  | 10841198 | 2 | 284 | G:0.869718         | A:0.130282        |
| chr28                                  | 10841364 | 2 | 298 | T:0.181208         | A:0.818792        |
| chr28                                  | 10841596 | 2 | 298 | T:0.718121         | C:0.281879        |
| chr28                                  | 10842018 | 2 | 300 | A:0.7 C:0.3        |                   |
| chr28                                  | 10842498 | 2 | 286 | T:0 C:1            |                   |
| chr28                                  | 10843285 | 2 | 284 | G:0.943662         | A:0.056338        |
| chr28                                  | 10843350 | 2 | 282 | A:0.705674         | G:0.294326        |



|       |              |   |     |                     |               |
|-------|--------------|---|-----|---------------------|---------------|
| chr28 | 10843359     | 2 | 284 | T:0.901408          | G:0.0985915   |
| chr28 | 10843728     | 2 | 302 | T:0.642384          | C:0.357616    |
| chr28 | 10843855     | 2 | 304 | G:0.680921          | C:0.319079    |
| chr28 | 10843924     | 2 | 302 | T:0.665563          | C:0.334437    |
| chr28 | 10843962     | 2 | 306 | G:0.663399          | A:0.336601    |
| chr28 | 10844288     | 2 | 306 | G:0.660131          | C:0.339869    |
| chr28 | 10844333     | 2 | 312 | GACTGAGAGT:0.650641 | G:            |
|       | 0.349359     |   |     |                     |               |
| chr28 | 10844335     | 2 | 312 | C:0.375             | CT:0.625      |
| chr28 | 10844341     | 2 | 312 | GT:0.375            | G:0.625       |
| chr28 | 10844570     | 2 | 262 | A:0.270992          | G:0.729008    |
| chr28 | 10844616     | 2 | 298 | A:0.285235          | G:0.714765    |
| chr28 | 10844668     | 2 | 294 | CT:0.248299         | C:0.751701    |
| chr28 | 10844683     | 3 | 294 | ATT:0.22449         | A:0.676871    |
|       | AT:0.0986395 |   |     |                     |               |
| chr28 | 10844687     | 2 | 294 | T:0.938776          | A:0.0612245   |
| chr28 | 10844769     | 2 | 288 | A:0.340278          | ACT:0.659722  |
| chr28 | 10844795     | 2 | 290 | T:0.313793          | C:0.686207    |
| chr28 | 10844839     | 2 | 278 | C:0.877698          | T:0.122302    |
| chr28 | 10844863     | 2 | 290 | A:0.293103          | G:0.706897    |
| chr28 | 10844929     | 2 | 306 | C:0.124183          | T:0.875817    |
| chr28 | 10845417     | 2 | 298 | C:0.674497          | T:0.325503    |
| chr28 | 10845589     | 2 | 294 | T:0.693878          | C:0.306122    |
| chr28 | 10846118     | 3 | 304 | CTT:0.319079        | C:0.0559211   |
|       | CT:0.625     |   |     |                     |               |
| chr28 | 10846650     | 2 | 304 | T:0.690789          | TAGG:0.309211 |
| chr28 | 10846675     | 2 | 304 | C:0.700658          | T:0.299342    |
| chr28 | 10846928     | 2 | 294 | G:0.442177          | T:0.557823    |
| chr28 | 10847235     | 2 | 302 | G:0.943709          | A:0.0562914   |
| chr28 | 10847410     | 2 | 314 | G:0.968153          | C:0.0318471   |
| chr28 | 10847418     | 2 | 314 | A:0.0955414         | G:0.904459    |
| chr28 | 10847584     | 2 | 296 | T:0.280405          | A:0.719595    |
| chr28 | 10847679     | 2 | 72  | CAG:0.5             | C:0.5         |
| chr28 | 10848111     | 2 | 296 | G:0.307432          | A:0.692568    |
| chr28 | 10848174     | 2 | 284 | T:0.112676          | C:0.887324    |
| chr28 | 10848225     | 2 | 282 | G:0.258865          | A:0.741135    |
| chr28 | 10848239     | 2 | 282 | C:0.85461           | A:0.14539     |
| chr28 | 10848338     | 2 | 266 | T:0.966165          | TA:0.0338346  |
| chr28 | 10848394     | 2 | 262 | T:0.828244          | A:0.171756    |
| chr28 | 10848395     | 2 | 262 | T:0.870229          | A:0.129771    |
| chr28 | 10848499     | 2 | 224 | A:0.40625           | T:0.59375     |
| chr28 | 10849025     | 2 | 196 | GTTTTT:0            | G:1           |
| chr28 | 10849030     | 2 | 196 | T:0                 | TGCCGC:1      |
| chr28 | 10849039     | 2 | 200 | T:0.86              | C:0.14        |
| chr28 | 10849065     | 2 | 192 | GTTT:0.880208       | G:0.119792    |
| chr28 | 10849066     | 2 | 170 | T:0.170588          | G:0.829412    |
| chr28 | 10849067     | 2 | 170 | TTTT:0.170588       | TCC:0.829412  |
| chr28 | 10849069     | 2 | 192 | T:0.880208          | G:0.119792    |
| chr28 | 10849070     | 2 | 192 | T:0.880208          | TCC:0.119792  |
| chr28 | 10849276     | 2 | 292 | T:0.763699          | C:0.236301    |
| chr28 | 10849368     | 2 | 298 | C:0.771812          | G:0.228188    |
| chr28 | 10849447     | 2 | 308 | G:0.415584          | A:0.584416    |
| chr28 | 10849747     | 2 | 304 | C:0.875             | T:0.125       |
| chr28 | 10850041     | 2 | 308 | A:0.0941558         | G:0.905844    |

|                                                                   |            |     |                             |              |
|-------------------------------------------------------------------|------------|-----|-----------------------------|--------------|
| chr28                                                             | 10850060 2 | 304 | T:0.240132                  | C:0.759868   |
| chr28                                                             | 10850147 2 | 310 | CACTG:0.377419              | C:0.622581   |
| chr28                                                             | 10850252 2 | 302 | G:0.943709                  | A:0.0562914  |
| chr28                                                             | 10850338 2 | 300 | G:0.396667                  | T:0.603333   |
| chr28                                                             | 10850349 2 | 300 | G:0.926667                  | C:0.0733333  |
| chr28                                                             | 10850419 2 | 302 | T:0.248344                  | C:0.751656   |
| chr28                                                             | 10850681 2 | 298 | T:0.234899                  | G:0.765101   |
| chr28                                                             | 10850687 2 | 298 | T:0.234899                  | C:0.765101   |
| chr28                                                             | 10850927 2 | 300 | G:0.85 C:0.15               |              |
| chr28                                                             | 10850955 2 | 296 | A:0.135135                  | G:0.864865   |
| chr28                                                             | 10850988 2 | 302 | C:0.221854                  | T:0.778146   |
| chr28                                                             | 10851005 2 | 298 | G:0.939597                  | A:0.0604027  |
| chr28                                                             | 10851045 2 | 296 | C:0.381757                  | T:0.618243   |
| chr28                                                             | 10851749 2 | 308 | TA:0.214286                 | T:0.785714   |
| chr28                                                             | 10851825 2 | 300 | T:0.906667                  | TA:0.0933333 |
| chr28                                                             | 10851934 2 | 300 | A:0.386667                  | G:0.613333   |
| chr28                                                             | 10851940 2 | 302 | A:0.768212                  | G:0.231788   |
| chr28                                                             | 10852366 2 | 290 | A:0.241379                  | G:0.758621   |
| chr28                                                             | 10852426 2 | 290 | T:0.258621                  | C:0.741379   |
| chr28                                                             | 10852547 2 | 298 | G:0.385906                  | A:0.614094   |
| chr28                                                             | 10852562 2 | 298 | C:0.385906                  | T:0.614094   |
| chr28                                                             | 10852702 2 | 298 | C:0.989933                  | T:0.0100671  |
| chr28                                                             | 10853084 2 | 280 | C:0.928571                  | T:0.0714286  |
| chr28                                                             | 10853383 2 | 304 | G:0.9375 A:0.0625           |              |
| chr28                                                             | 10853503 2 | 320 |                             |              |
| TGAGCCACCAGAGCCACCCAAGCCATCAGAGCTACCCAAGCCATCCGAGCCACCCAAGCCACCA: |            |     |                             |              |
| 0.353125 T:0.646875                                               |            |     |                             |              |
| chr28                                                             | 10853651 2 | 302 | T:0.221854                  | A:0.778146   |
| chr28                                                             | 10853841 2 | 288 | G:0.923611                  | A:0.0763889  |
| chr28                                                             | 10854052 2 | 314 | TCAAGTGGCCC:0.907643        | T:           |
| 0.0923567                                                         |            |     |                             |              |
| chr28                                                             | 10854055 2 | 314 | A:0.378981                  | T:0.621019   |
| chr28                                                             | 10854064 2 | 314 | TGG:0.907643                | T:0.0923567  |
| chr28                                                             | 10854067 2 | 314 | C:0.907643                  | A:0.0923567  |
| chr28                                                             | 10854492 2 | 304 | G:0.148026                  | C:0.851974   |
| chr28                                                             | 10854518 2 | 290 | T:0.989655                  | TC:0.0103448 |
| chr28                                                             | 10854706 2 | 298 | C:0.828859                  | T:0.171141   |
| chr28                                                             | 10854778 2 | 292 | A:0.958904                  | G:0.0410959  |
| chr28                                                             | 10854837 2 | 300 | C:0.856667                  | T:0.143333   |
| chr28                                                             | 10855201 4 | 312 | TTATCTATCTATC:0.471154      | T:           |
| 0.0705128 TTATCTATC:0.163462 TTATCTATCTATCTATC:                   |            |     |                             |              |
| 0.294872                                                          |            |     |                             |              |
| chr28                                                             | 10855616 2 | 300 | A:0.156667                  | G:0.843333   |
| chr28                                                             | 10855998 2 | 320 | G:0.8375 GGA:0.1625         |              |
| chr28                                                             | 10856001 2 | 320 | ATCT:0.8375                 | A:0.1625     |
| chr28                                                             | 10856008 2 | 320 | AAAAAAGTTT:0.8375           | A:0.1625     |
| chr28                                                             | 10856018 2 | 320 | CAA:0.8375                  | C:0.1625     |
| chr28                                                             | 10856024 2 | 320 | GACAAAATTCAAAGTCTGCA:0.8375 |              |
| G:0.1625                                                          |            |     |                             |              |
| chr28                                                             | 10856047 2 | 320 | AGT:0.8375                  | A:0.1625     |
| chr28                                                             | 10856051 2 | 320 | TAG:0.8375                  | T:0.1625     |
| chr28                                                             | 10856054 2 | 320 | T:0.8375 TAA:0.1625         |              |
| chr28                                                             | 10856060 2 | 320 | T:0.8375 A:0.1625           |              |
| chr28                                                             | 10856061 2 | 320 | GTT:0.8375                  | G:0.1625     |

|       |                               |     |                             |
|-------|-------------------------------|-----|-----------------------------|
| chr28 | 10856067 2                    | 320 | T:0.8375 TAA:0.1625         |
| chr28 | 10856069 2                    | 320 | T:0.8375 A:0.1625           |
| chr28 | 10856605 2                    | 302 | GC:0.387417 G:0.612583      |
| chr28 | 10856834 2                    | 288 | G:0.361111 A:0.638889       |
| chr28 | 10856891 2                    | 302 | C:0.764901 T:0.235099       |
| chr28 | 10857213 4                    | 316 | GGAGAGAGAGAGAGA:0.553797 G: |
|       | 0.126582 GGAGAGAGAGA:0.126582 |     | GGAGAGAGAGAGAGAGA:0.193038  |
| chr28 | 10857820 2                    | 278 | C:0.809353 CT:0.190647      |
| chr28 | 10857822 2                    | 272 | TC:0.683824 T:0.316176      |
| chr28 | 10858452 2                    | 286 | G:0.982517 A:0.0174825      |
| chr28 | 10858753 2                    | 302 | G:0.860927 A:0.139073       |
| chr28 | 10859031 2                    | 308 | C:0.980519 A:0.0194805      |
| chr28 | 10859145 2                    | 304 | G:0.845395 A:0.154605       |
| chr28 | 10859432 2                    | 292 | T:0.366438 C:0.633562       |
| chr28 | 10859500 3                    | 292 | C:0.174658 CCT:0.660959     |
|       | CCTCT:0.164384                |     |                             |
| chr28 | 10859548 3                    | 288 | T:0.121528 TAA:0.711806     |
|       | TAAA:0.166667                 |     |                             |
| chr28 | 10859591 2                    | 308 | A:0.0779221 G:0.922078      |
| chr28 | 10859789 3                    | 308 | GT:0.454545 G:0.0422078     |
|       | GTT:0.503247                  |     |                             |
| chr28 | 10859873 2                    | 308 | C:0.155844 G:0.844156       |
| chr28 | 10859994 2                    | 312 | A:0.875 G:0.125             |
| chr28 | 10860062 2                    | 304 | A:0.875 G:0.125             |
| chr28 | 10860259 2                    | 308 | CAGAAAAA:0.288961 C:        |
|       | 0.711039                      |     |                             |
| chr28 | 10860267 2                    | 308 | TG:0.288961 T:0.711039      |
| chr28 | 10860770 2                    | 306 | A:0.238562 G:0.761438       |
| chr28 | 10861029 2                    | 294 | G:0.945578 A:0.0544218      |
| chr28 | 10861190 2                    | 256 | G:0.691406 C:0.308594       |
| chr28 | 10861553 2                    | 298 | G:0.395973 A:0.604027       |
| chr28 | 10861598 2                    | 302 | C:0.877483 T:0.122517       |
| chr28 | 10861930 2                    | 292 | G:0.39726 A:0.60274         |
| chr28 | 10862118 2                    | 306 | C:0.869281 T:0.130719       |
| chr28 | 10862629 2                    | 294 | A:0.285714 G:0.714286       |
| chr28 | 10862731 2                    | 274 | G:0.945255 T:0.0547445      |
| chr28 | 10862999 2                    | 296 | C:0.692568 T:0.307432       |
| chr28 | 10863039 2                    | 298 | A:0.885906 T:0.114094       |
| chr28 | 10863951 2                    | 312 | C:0.737179 T:0.262821       |
| chr28 | 10863957 2                    | 312 | C:0.426282 T:0.573718       |
| chr28 | 10864055 2                    | 302 | A:0.741722 G:0.258278       |
| chr28 | 10864420 2                    | 296 | GT:0.402027 G:0.597973      |
| chr28 | 10864676 2                    | 308 | T:0.256494 A:0.743506       |
| chr28 | 10864720 2                    | 300 | A:0.27 T:0.73               |
| chr28 | 10865160 2                    | 314 | TAC:0.414013 T:0.585987     |
| chr28 | 10865211 3                    | 298 | GT:0.379195 G:0.583893      |
|       | GTT:0.0369128                 |     |                             |
| chr28 | 10865255 2                    | 296 | C:0.371622 A:0.628378       |
| chr28 | 10865768 4                    | 292 | C:0.263699 CT:0.136986      |
|       | CTT:0.458904 CTTT:0.140411    |     |                             |
| chr28 | 10865823 2                    | 312 | A:0.788462 AAGAGAGAG:       |
|       | 0.211538                      |     |                             |
| chr28 | 10865863 2                    | 296 | C:0.695946 A:0.304054       |
| chr28 | 10865864 2                    | 296 | C:0.695946 G:0.304054       |

|                               |          |   |     |                      |               |
|-------------------------------|----------|---|-----|----------------------|---------------|
| chr28                         | 10866132 | 2 | 304 | TAGA:0.947368        | T:0.0526316   |
| chr28                         | 10866499 | 2 | 310 | G:0.945161           | A:0.0548387   |
| chr28                         | 10866730 | 2 | 302 | A:0.903974           | G:0.0960265   |
| chr28                         | 10866868 | 2 | 310 | C:0.929032           | A:0.0709677   |
| chr28                         | 10866882 | 3 | 314 | T:0.410828           | TTTTTTTTTC:   |
| 0.487261 TTTTTTTTTTC:0.101911 |          |   |     |                      |               |
| chr28                         | 10866963 | 2 | 302 | T:0.837748           | C:0.162252    |
| chr28                         | 10867622 | 2 | 294 | T:0.42517            | A:0.57483     |
| chr28                         | 10867736 | 2 | 284 | G:0.764085           | C:0.235915    |
| chr28                         | 10868147 | 2 | 262 | C:0.515267           | T:0.484733    |
| chr28                         | 10868162 | 2 | 300 | C:0.773333           | T:0.226667    |
| chr28                         | 10868166 | 3 | 316 | CCTCT:0.313291       | C:0.21519     |
| CCTCTCTCTCTCTCTCT:0.471519    |          |   |     |                      |               |
| chr28                         | 10868195 | 2 | 290 | C:0.465517           | T:0.534483    |
| chr28                         | 10868318 | 2 | 310 | T:0.412903           | A:0.587097    |
| chr28                         | 10868481 | 2 | 280 | A:0.0857143          | T:0.914286    |
| chr28                         | 10868483 | 2 | 280 | T:0.167857           | C:0.832143    |
| chr28                         | 10868521 | 2 | 308 | CTCTCTCTCTT:0.818182 | C:            |
| 0.181818                      |          |   |     |                      |               |
| chr28                         | 10868576 | 2 | 298 | A:0.151007           | AAAT:0.848993 |
| chr28                         | 10868578 | 2 | 298 | A:0.926174           | AT:0.0738255  |
| chr28                         | 10868758 | 2 | 286 | C:0.741259           | T:0.258741    |
| chr28                         | 10868815 | 2 | 288 | G:0.381944           | C:0.618056    |
| chr28                         | 10868964 | 2 | 306 | T:0.418301           | A:0.581699    |
| chr28                         | 10869130 | 2 | 292 | C:0.260274           | T:0.739726    |
| chr28                         | 10869158 | 2 | 288 | T:0.871528           | G:0.128472    |
| chr28                         | 10869284 | 2 | 310 | A:0.432258           | G:0.567742    |
| chr28                         | 10869285 | 2 | 310 | A:0.432258           | C:0.567742    |
| chr28                         | 10869310 | 2 | 310 | T:0.16129            | G:0.83871     |
| chr28                         | 10869556 | 2 | 276 | C:0.376812           | CTTT:0.623188 |
| chr28                         | 10869590 | 2 | 304 | GAGAT:0.967105       | G:0.0328947   |
| chr28                         | 10869596 | 2 | 292 | GAGAC:0.767123       | G:0.232877    |
| chr28                         | 10869650 | 2 | 298 | A:0.322148           | T:0.677852    |
| chr28                         | 10869654 | 2 | 296 | C:0.398649           | T:0.601351    |
| chr28                         | 10869696 | 2 | 282 | C:0.397163           | T:0.602837    |
| chr28                         | 10869731 | 2 | 298 | C:0.372483           | A:0.627517    |
| chr28                         | 10869775 | 2 | 290 | T:0.403448           | A:0.596552    |
| chr28                         | 10869897 | 2 | 290 | C:0.4                | T:0.6         |
| chr28                         | 10870079 | 2 | 296 | C:0.385135           | T:0.614865    |
| chr28                         | 10870392 | 2 | 306 | A:0.441176           | G:0.558824    |
| chr28                         | 10870618 | 2 | 296 | T:0.439189           | G:0.560811    |
| chr28                         | 10870656 | 2 | 294 | G:0.421769           | A:0.578231    |
| chr28                         | 10870776 | 2 | 264 | G:0.439394           | GT:0.560606   |
| chr28                         | 10870878 | 2 | 282 | T:0.868794           | C:0.131206    |
| chr28                         | 10870990 | 2 | 278 | A:0.266187           | G:0.733813    |
| chr28                         | 10871005 | 2 | 286 | C:0.940559           | A:0.0594406   |
| chr28                         | 10871006 | 2 | 286 | C:0.888112           | T:0.111888    |
| chr28                         | 10871062 | 2 | 292 | G:0.414384           | T:0.585616    |
| chr28                         | 10871087 | 2 | 298 | C:0.432886           | T:0.567114    |
| chr28                         | 10871128 | 2 | 292 | T:0.39726            | C:0.60274     |
| chr28                         | 10871129 | 2 | 292 | G:0.39726            | A:0.60274     |
| chr28                         | 10871149 | 2 | 300 | C:0.85               | T:0.15        |
| chr28                         | 10871212 | 2 | 296 | G:0.885135           | A:0.114865    |
| chr28                         | 10871264 | 2 | 298 | C:0.419463           | A:0.580537    |

|                      |          |   |     |               |                   |
|----------------------|----------|---|-----|---------------|-------------------|
| chr28                | 10871302 | 2 | 286 | C:0.381119    | T:0.618881        |
| chr28                | 10871347 | 2 | 302 | T:0.887417    | C:0.112583        |
| chr28                | 10871425 | 2 | 298 | C:0.389262    | T:0.610738        |
| chr28                | 10871534 | 2 | 298 | A:0.268456    | G:0.731544        |
| chr28                | 10871606 | 2 | 310 | GC:0.919355   | G:0.0806452       |
| chr28                | 10871740 | 2 | 302 | A:0.950331    | G:0.0496689       |
| chr28                | 10871886 | 2 | 304 | G:0.434211    | A:0.565789        |
| chr28                | 10871887 | 2 | 304 | T:0.434211    | C:0.565789        |
| chr28                | 10872568 | 2 | 300 | T:0.1 A:0.9   |                   |
| chr28                | 10872820 | 2 | 300 | AG:0.176667   | A:0.823333        |
| chr28                | 10872826 | 2 | 304 | T:0.983553    | TA:0.0164474      |
| chr28                | 10872858 | 2 | 306 | A:0.434641    | G:0.565359        |
| chr28                | 10872929 | 2 | 308 | T:0.863636    | G:0.136364        |
| chr28                | 10873807 | 2 | 310 | T:0.432258    | C:0.567742        |
| chr28                | 10874308 | 2 | 292 | G:0.0993151   | A:0.900685        |
| chr28                | 10874488 | 2 | 302 | C:0.847682    | T:0.152318        |
| chr28                | 10874513 | 2 | 298 | C:0.919463    | T:0.0805369       |
| chr28                | 10874561 | 2 | 302 | A:0.933775    | C:0.0662252       |
| chr28                | 10874875 | 2 | 288 | T:0.989583    | C:0.0104167       |
| chr28                | 10874877 | 2 | 286 | G:0.979021    | A:0.020979        |
| chr28                | 10875700 | 2 | 306 | C:0.846405    | T:0.153595        |
| chr28                | 10876582 | 2 | 296 | C:0.925676    | G:0.0743243       |
| chr28                | 10876610 | 2 | 300 | G:0.83 T:0.17 |                   |
| chr28                | 10876739 | 2 | 300 | G:0.84 A:0.16 |                   |
| chr28                | 10877140 | 2 | 294 | G:0.408163    | A:0.591837        |
| chr28                | 10877370 | 2 | 302 | T:0.145695    | G:0.854305        |
| chr28                | 10877580 | 2 | 278 | TCA:0.942446  | T:0.057554        |
| chr28                | 10877612 | 3 | 276 | T:0.282609    | TA:0.34058        |
| TAAA:0.376812        |          |   |     |               |                   |
| chr28                | 10877971 | 2 | 302 | G:0.927152    | T:0.0728477       |
| chr28                | 10877998 | 2 | 304 | C:0.845395    | T:0.154605        |
| chr28                | 10878014 | 2 | 304 | C:0.845395    | A:0.154605        |
| chr28                | 10878049 | 2 | 300 | A:0.846667    | T:0.153333        |
| chr28                | 10878119 | 2 | 300 | A:0.25 G:0.75 |                   |
| chr28                | 10878826 | 2 | 300 | C:0.97 T:0.03 |                   |
| chr28                | 10879239 | 2 | 312 | T:0.413462    | A:0.586538        |
| chr28                | 10879496 | 2 | 310 | T:0.980645    | C:0.0193548       |
| chr28                | 10879749 | 2 | 302 | G:0.966887    | C:0.0331126       |
| chr28                | 10879835 | 2 | 312 | C:0.272436    | G:0.727564        |
| chr28                | 10879837 | 2 | 308 | AT:0.831169   | A:0.168831        |
| chr28                | 10879933 | 2 | 302 | T:0.135762    | C:0.864238        |
| chr28                | 10880214 | 2 | 294 | C:0.14966     | T:0.85034         |
| chr28                | 10880333 | 2 | 310 | G:0.141935    | GATTAA:0.858065   |
| chr28                | 10880468 | 2 | 286 | C:0.839161    | T:0.160839        |
| chr28                | 10880501 | 2 | 282 | G:0.0957447   | A:0.904255        |
| chr28                | 10880523 | 2 | 284 | C:0.838028    | T:0.161972        |
| chr28                | 10880620 | 2 | 306 | C:0.254902    | G:0.745098        |
| chr28                | 10880621 | 2 | 314 | T:0.127389    | TGTGA:0.872611    |
| chr28                | 10880633 | 2 | 310 | T:0.954839    | TA:0.0451613      |
| chr28                | 10880637 | 2 | 306 | A:0.859477    | AAAAAAAT:         |
| 0.140523             |          |   |     |               |                   |
| chr28                | 10880638 | 3 | 306 | A:0.356209    | AAAAAAAT:0.633987 |
| AAAAAAATT:0.00980392 |          |   |     |               |                   |
| chr28                | 10880657 | 2 | 310 | A:0.954839    | T:0.0451613       |

|                          |          |   |     |                          |                |
|--------------------------|----------|---|-----|--------------------------|----------------|
| chr28                    | 10880785 | 2 | 296 | T:0.0810811              | A:0.918919     |
| chr28                    | 10880789 | 2 | 296 | C:0.898649               | A:0.101351     |
| chr28                    | 10881307 | 2 | 304 | A:0.167763               | C:0.832237     |
| chr28                    | 10881437 | 2 | 308 | A:0.863636               | G:0.136364     |
| chr28                    | 10881444 | 2 | 308 | C:0.383117               | T:0.616883     |
| chr28                    | 10881588 | 3 | 292 | CTTTT:0.818493           | C:0.0993151    |
| CTT:0.0821918            |          |   |     |                          |                |
| chr28                    | 10881646 | 2 | 298 | C:0.899329               | T:0.100671     |
| chr28                    | 10881792 | 2 | 286 | T:0.912587               | G:0.0874126    |
| chr28                    | 10881808 | 2 | 292 | G:0.921233               | A:0.0787671    |
| chr28                    | 10881849 | 2 | 296 | A:0.847973               | G:0.152027     |
| chr28                    | 10882110 | 2 | 292 | C:0.859589               | CCTCT:0.140411 |
| chr28                    | 10882163 | 2 | 288 | C:0.847222               | T:0.152778     |
| chr28                    | 10882434 | 2 | 306 | G:0.169935               | C:0.830065     |
| chr28                    | 10882688 | 2 | 298 | TG:0.171141              | T:0.828859     |
| chr28                    | 10882760 | 2 | 296 | C:0.817568               | A:0.182432     |
| chr28                    | 10882808 | 2 | 306 | A:0.800654               | G:0.199346     |
| chr28                    | 10882976 | 2 | 308 | C:0.418831               | G:0.581169     |
| chr28                    | 10883014 | 2 | 304 | C:0.8125                 | T:0.1875       |
| chr28                    | 10883028 | 2 | 300 | A:0.09                   | G:0.91         |
| chr28                    | 10883125 | 2 | 290 | T:0.817241               | C:0.182759     |
| chr28                    | 10883240 | 2 | 290 | TA:0.786207              | T:0.213793     |
| chr28                    | 10883368 | 2 | 306 | T:0.179739               | G:0.820261     |
| chr28                    | 10883680 | 2 | 306 | T:0.189542               | C:0.810458     |
| chr28                    | 10884142 | 2 | 304 | A:0.240132               | AT:0.759868    |
| chr28                    | 10884231 | 2 | 308 | A:0.237013               | T:0.762987     |
| chr28                    | 10884436 | 2 | 294 | A:0.789116               | G:0.210884     |
| chr28                    | 10884509 | 2 | 300 | G:0.983333               | C:0.0166667    |
| chr28                    | 10884565 | 2 | 296 | T:0.97973                | G:0.0202703    |
| chr28                    | 10884599 | 4 | 298 | TAAA:0.221477            | T:0.157718     |
| TA:0.463087 TAA:0.157718 |          |   |     |                          |                |
| chr28                    | 10885261 | 2 | 270 | T:0.144444               | C:0.855556     |
| chr28                    | 10885283 | 2 | 278 | G:0.147482               | A:0.852518     |
| chr28                    | 10885292 | 2 | 286 | G:0.786713               | A:0.213287     |
| chr28                    | 10885993 | 2 | 304 | T:0.421053               | A:0.578947     |
| chr28                    | 10886462 | 2 | 308 | TAA:0.142857             | T:0.857143     |
| chr28                    | 10886477 | 2 | 312 | C:0.730769               | A:0.269231     |
| chr28                    | 10886537 | 2 | 306 | G:0.973856               | A:0.0261438    |
| chr28                    | 10887200 | 2 | 308 | G:0.717532               | A:0.282468     |
| chr28                    | 10887440 | 2 | 306 | AT:0.401961              | A:0.598039     |
| chr28                    | 10887451 | 2 | 308 | TG:0.996753              | T:0.00324675   |
| chr28                    | 10887501 | 2 | 318 | C:0.886792               | CT:0.113208    |
| chr28                    | 10887503 | 2 | 318 | T:0.41195                | TTA:0.58805    |
| chr28                    | 10887504 | 2 | 318 | TTTTTTTATTTTTTA:0.871069 | T:             |
| 0.128931                 |          |   |     |                          |                |
| chr28                    | 10887511 | 2 | 318 | A:0.446541               | AT:0.553459    |
| chr28                    | 10887512 | 2 | 316 | TTTTTTAA:0.993671        | T:             |
| 0.00632911               |          |   |     |                          |                |
| chr28                    | 10887519 | 2 | 318 | A:0.446541               | T:0.553459     |
| chr28                    | 10887526 | 2 | 318 | T:0.871069               | TA:0.128931    |
| chr28                    | 10887540 | 2 | 318 | G:0.767296               | GT:0.232704    |
| chr28                    | 10887541 | 3 | 318 | C:0.166667               | A:0.591195     |
| CA:0.242138              |          |   |     |                          |                |
| chr28                    | 10887552 | 2 | 318 | G:0.474843               | GAGAGAGGC:     |

0.525157

|       |          |   |     |            |                |
|-------|----------|---|-----|------------|----------------|
| chr28 | 10887723 | 2 | 294 | C:0.969388 | A:0.0306122    |
| chr28 | 10887724 | 2 | 294 | C:0.278912 | G:0.721088     |
| chr28 | 10887906 | 2 | 306 | T:0.251634 | A:0.748366     |
| chr28 | 10887991 | 2 | 300 | G:0.84     | A:0.16         |
| chr28 | 10888001 | 2 | 308 | G:0.87987  | A:0.12013      |
| chr28 | 10888546 | 2 | 304 | A:0.276316 | G:0.723684     |
| chr28 | 10888643 | 2 | 304 | T:0.407895 | C:0.592105     |
| chr28 | 10888752 | 2 | 316 | C:0.294304 | T:0.705696     |
| chr28 | 10888856 | 2 | 304 | A:0.421053 | G:0.578947     |
| chr28 | 10888873 | 2 | 302 | A:0.245033 | T:0.754967     |
| chr28 | 10888979 | 2 | 308 | A:0.292208 | G:0.707792     |
| chr28 | 10889159 | 2 | 316 | A:0.439873 | G:0.560127     |
| chr28 | 10889208 | 2 | 308 | G:0.86039  | GTTATT:0.13961 |
| chr28 | 10889388 | 2 | 288 | G:0.868056 | C:0.131944     |
| chr28 | 10889581 | 2 | 300 | TTTTA:0.87 | T:0.13         |
| chr28 | 10889598 | 2 | 298 | A:0.869128 | G:0.130872     |
| chr28 | 10889965 | 2 | 270 | A:0.214815 | AT:0.785185    |
| chr28 | 10890035 | 2 | 280 | C:0.871429 | T:0.128571     |
| chr28 | 10890255 | 2 | 300 | G:0.313333 | A:0.686667     |
| chr28 | 10890290 | 2 | 294 | A:0.758503 | G:0.241497     |
| chr28 | 10890352 | 2 | 278 | G:0.751799 | C:0.248201     |
| chr28 | 10890492 | 2 | 282 | G:0.677305 | A:0.322695     |
| chr28 | 10890598 | 3 | 242 | T:0.396694 | TG:0.516529    |

TGG:0.0867769

|       |          |   |     |                        |    |
|-------|----------|---|-----|------------------------|----|
| chr28 | 10890840 | 2 | 112 | TGGCGGCGGCGGC:0.294643 | T: |
|-------|----------|---|-----|------------------------|----|

0.705357

|       |          |   |     |             |             |
|-------|----------|---|-----|-------------|-------------|
| chr28 | 10891262 | 2 | 258 | C:0.0968992 | CA:0.903101 |
| chr28 | 10891267 | 2 | 262 | G:0.80916   | C:0.19084   |
| chr28 | 10891415 | 2 | 292 | G:0.472603  | A:0.527397  |
| chr28 | 10891631 | 2 | 294 | C:0.132653  | G:0.867347  |
| chr28 | 10892104 | 2 | 300 | G:0.873333  | C:0.126667  |
| chr28 | 10892388 | 2 | 304 | A:0.980263  | C:0.0197368 |
| chr28 | 10892613 | 3 | 290 | C:0.582759  | CT:0.231034 |

CTTT:0.186207

|       |          |   |     |                |              |
|-------|----------|---|-----|----------------|--------------|
| chr28 | 10893265 | 2 | 296 | T:0.881757     | A:0.118243   |
| chr28 | 10893391 | 2 | 310 | CT:0.877419    | C:0.122581   |
| chr28 | 10893402 | 2 | 308 | C:0.824675     | T:0.175325   |
| chr28 | 10893436 | 2 | 308 | G:0.987013     | A:0.012987   |
| chr28 | 10894068 | 2 | 304 | C:0.809211     | T:0.190789   |
| chr28 | 10894272 | 2 | 268 | A:0.86194      | AT:0.13806   |
| chr28 | 10894438 | 2 | 316 | A:0.993671     | T:0.00632911 |
| chr28 | 10894539 | 2 | 278 | C:0.482014     | CAG:0.517986 |
| chr28 | 10894647 | 2 | 300 | C:0.44         | A:0.56       |
| chr28 | 10894755 | 2 | 304 | G:0.940789     | GT:0.0592105 |
| chr28 | 10894864 | 2 | 298 | A:0.97651      | T:0.0234899  |
| chr28 | 10894994 | 2 | 290 | C:0.975862     | T:0.0241379  |
| chr28 | 10895137 | 3 | 314 | TATTG:0.347134 | T:0.0541401  |

TATTGATTG:0.598726

|       |          |   |     |                  |             |
|-------|----------|---|-----|------------------|-------------|
| chr28 | 10895171 | 2 | 312 | GACACAC:0.179487 | G:0.820513  |
| chr28 | 10895298 | 2 | 296 | G:0.925676       | C:0.0743243 |
| chr28 | 10895383 | 2 | 308 | GTTTGTT:0.87987  | G:0.12013   |
| chr28 | 10895443 | 2 | 310 | G:0.980645       | A:0.0193548 |
| chr28 | 10895844 | 2 | 302 | G:0.983444       | A:0.0165563 |

|                                  |            |     |                                 |                             |
|----------------------------------|------------|-----|---------------------------------|-----------------------------|
| chr28                            | 10896146 2 | 308 | T:0.418831                      | A:0.581169                  |
| chr28                            | 10896255 2 | 298 | G:0.989933                      | C:0.0100671                 |
| chr28                            | 10896385 2 | 288 | TA:0.763889                     | T:0.236111                  |
| chr28                            | 10897336 2 | 306 | G:0.0816993                     | GC:0.918301                 |
| chr28                            | 10897637 2 | 314 | A:0 C:1                         |                             |
| chr28                            | 10897638 2 | 314 | A:0 T:1                         |                             |
| chr28                            | 10897678 2 | 310 | A:0 T:1                         |                             |
| chr28                            | 10897680 2 | 310 | G:0 A:1                         |                             |
| chr28                            | 10898145 2 | 302 | T:0.0993377                     | G:0.900662                  |
| chr28                            | 10899759 2 | 304 | G:0.858553                      | A:0.141447                  |
| chr28                            | 10900002 2 | 306 | A:0.415033                      | G:0.584967                  |
| chr28                            | 10901102 2 | 290 | A:0.975862                      | AT:0.0241379                |
| chr28                            | 10901787 2 | 310 | AGGATTTTCACTGT:0.983871         | A:<br>0.016129              |
| chr28                            | 10902365 4 | 304 | T:0.256579                      | TTC:0.536184                |
| TTCTC:0.128289 TTCTCTC:0.0789474 |            |     |                                 |                             |
| chr28                            | 10902471 3 | 302 | CT:0.652318                     | C:0.168874                  |
| CTT:0.178808                     |            |     |                                 |                             |
| chr28                            | 10902624 2 | 308 | G:0.967532                      | A:0.0324675                 |
| chr28                            | 10902631 2 | 298 | GGA:0.969799                    | G:0.0302013                 |
| chr28                            | 10903125 2 | 304 | T:0.980263                      | C:0.0197368                 |
| chr28                            | 10905054 2 | 312 | A:0.961538                      | G:0.0384615                 |
| chr28                            | 10905636 2 | 268 | C:0.697761                      | CT:0.302239                 |
| chr28                            | 10905757 2 | 290 | C:0.358621                      | CT:0.641379                 |
| chr28                            | 10906371 2 | 300 | C:0.986667                      | T:0.0133333                 |
| chr28                            | 10907929 3 | 272 | C:0.345588                      | CT:0.595588                 |
| CTT:0.0588235                    |            |     |                                 |                             |
| chr28                            | 10908479 2 | 286 | G:0.195804                      | GT:0.804196                 |
| chr28                            | 10909005 2 | 258 | G:0.375969                      | A:0.624031                  |
| chr28                            | 10909089 2 | 298 | C:0.922819                      | T:0.0771812                 |
| chr28                            | 10909106 2 | 286 | T:0.454545                      | TAAA:0.545455               |
| chr28                            | 10909107 4 | 290 | T:0.2 A:0.555172                | TAAA:<br>0.213793           |
| TTAA:0.0310345                   |            |     |                                 |                             |
| chr28                            | 10909525 2 | 298 | C:0.902685                      | CAGAG:0.0973154             |
| chr28                            | 10909952 6 | 318 | T:0.185535                      | TATAG:0.122642              |
| TATAGATAG:0.216981               |            |     | TATAGATAGATAG:0.380503          |                             |
| TATAGATAGATAGATAG:0.0754717      |            |     | TATAGATAGATAGATAGATAG:0.0188679 |                             |
| chr28                            | 10909963 2 | 318 | A:0.965409                      | AGATAGATAGATG:<br>0.0345912 |
| chr28                            | 10911677 2 | 300 | CT:0.963333                     | C:0.0366667                 |
| chr28                            | 10912047 2 | 294 | T:0.969388                      | A:0.0306122                 |
| chr28                            | 10912950 2 | 306 | A:0.862745                      | G:0.137255                  |
| chr28                            | 10913896 2 | 306 | TG:0.98366                      | T:0.0163399                 |
| chr28                            | 10914811 2 | 292 | CTA:0.339041                    | C:0.660959                  |
| chr28                            | 10914827 5 | 312 | CAAATAAAT:0.221154              | C:<br>0.269231              |
| CAAAT:0.160256                   |            |     | CAAATAAATAAAT:0.185897          |                             |
| CAAATAAATAAATAAAT:0.163462       |            |     |                                 |                             |
| chr28                            | 10915294 2 | 310 | C:0.974194                      | T:0.0258065                 |
| chr28                            | 10915752 2 | 302 | T:0.81457                       | A:0.18543                   |
| chr28                            | 10915858 2 | 290 | C:0.996552                      | T:0.00344828                |
| chr28                            | 10916032 3 | 266 | C:0.289474                      | CT:0.357143                 |
| CTTT:0.353383                    |            |     |                                 |                             |
| chr28                            | 10916305 2 | 290 | T:0.431034                      | C:0.568966                  |
| chr28                            | 10916365 2 | 310 | C:0.445161                      | T:0.554839                  |



|                                        |            |     |                             |                |
|----------------------------------------|------------|-----|-----------------------------|----------------|
| chr28                                  | 10917379 2 | 238 | C:0.390756                  | CT:0.609244    |
| chr28                                  | 10917399 2 | 268 | A:0.850746                  | C:0.149254     |
| chr28                                  | 10918597 2 | 302 | T:0.97351                   | C:0.0264901    |
| chr28                                  | 10918758 2 | 314 | CTAAG:0.996815              | C:0.00318471   |
| chr28                                  | 10918832 2 | 302 | C:0.857616                  | T:0.142384     |
| chr28                                  | 10920076 2 | 294 | C:0.972789                  | G:0.0272109    |
| chr28                                  | 10924839 2 | 296 | G:0.810811                  | A:0.189189     |
| chr28                                  | 10924859 2 | 300 | T:0.916667                  | A:0.0833333    |
| chr28                                  | 10925321 2 | 242 | GC:0.92562                  | G:0.0743802    |
| chr28                                  | 10925332 2 | 250 | CCA:0.924                   | C:0.076        |
| chr28                                  | 10925333 2 | 218 | CA:0.678899                 | C:0.321101     |
| chr28                                  | 10925638 2 | 308 | C:0.912338                  | T:0.0876623    |
| chr28                                  | 10925699 2 | 294 | TC:0.982993                 | T:0.0170068    |
| chr28                                  | 10926072 2 | 290 | T:0.424138                  | C:0.575862     |
| chr28                                  | 10926654 2 | 298 | A:0.469799                  | G:0.530201     |
| chr28                                  | 10926698 2 | 270 | TA:0.740741                 | T:0.259259     |
| chr28                                  | 10927281 2 | 298 | C:0.177852                  | T:0.822148     |
| chr28                                  | 10927702 2 | 300 | C:0.973333                  | T:0.0266667    |
| chr28                                  | 10927966 2 | 296 | T:0.175676                  | C:0.824324     |
| chr28                                  | 10928296 4 | 300 | T:0.15 TA:0.413333          | TAA:           |
| 0.353333 TAAA:0.0833333                |            |     |                             |                |
| chr28                                  | 10928307 2 | 308 | A:0.99026                   | AAC:0.00974026 |
| chr28                                  | 10929538 2 | 304 | T:0.657895                  | C:0.342105     |
| chr28                                  | 10929724 2 | 306 | G:0.934641                  | A:0.0653595    |
| chr28                                  | 10930563 2 | 220 | G:0.940909                  | A:0.0590909    |
| chr28                                  | 10930732 2 | 126 | G:0.230159                  | C:0.769841     |
| chr28                                  | 10931128 2 | 204 | CG:0.127451                 | C:0.872549     |
| chr28                                  | 10931223 2 | 268 | T:0.242537                  | C:0.757463     |
| chr28                                  | 10931289 2 | 282 | A:0.900709                  | G:0.0992908    |
| chr28                                  | 10931588 2 | 306 | G:0.379085                  | C:0.620915     |
| chr28                                  | 10931590 2 | 304 | G:0.460526                  | C:0.539474     |
| chr28                                  | 10931625 2 | 312 | T:0.275641                  | TA:0.724359    |
| chr28                                  | 10931626 2 | 312 | T:0.275641                  | A:0.724359     |
| chr28                                  | 10931741 2 | 308 | A:0.412338                  | C:0.587662     |
| chr28                                  | 10931801 2 | 276 | G:0.978261                  | C:0.0217391    |
| chr28                                  | 10931842 2 | 280 | C:0.296429                  | CAG:0.703571   |
| chr28                                  | 10932002 3 | 318 | TAAAAAAAAAAAAACATA:0.311321 |                |
| T:0.144654 TAAAAAAAAAAAAACATA:0.544025 |            |     |                             |                |
| chr28                                  | 10932018 2 | 316 | TA:0.471519                 | T:0.528481     |
| chr28                                  | 10932229 3 | 222 | CTGTG:0.445946              | C:0.292793     |
| CTG:0.261261                           |            |     |                             |                |
| chr28                                  | 10932540 2 | 306 | C:0.633987                  | A:0.366013     |
| chr28                                  | 10932838 2 | 312 | C:0.974359                  | T:0.025641     |
| chr28                                  | 10933289 2 | 308 | A:0.782468                  | G:0.217532     |
| chr28                                  | 10933798 2 | 288 | C:0.847222                  | CA:0.152778    |
| chr28                                  | 10933842 2 | 306 | T:0.980392                  | A:0.0196078    |
| chr28                                  | 10934253 2 | 298 | T:0.657718                  | C:0.342282     |
| chr28                                  | 10934424 2 | 298 | T:0.201342                  | C:0.798658     |
| chr28                                  | 10934487 2 | 302 | A:0.225166                  | T:0.774834     |
| chr28                                  | 10934765 2 | 302 | T:0.612583                  | C:0.387417     |
| chr28                                  | 10934913 2 | 302 | A:0.943709                  | G:0.0562914    |
| chr28                                  | 10934991 2 | 276 | TA:0.333333                 | T:0.666667     |
| chr28                                  | 10934992 2 | 278 | A:0.931655                  | T:0.0683453    |
| chr28                                  | 10935306 2 | 310 | T:0.76129                   | A:0.23871      |

chr28 10935724 2 296 T:0.898649 C:0.101351  
chr28 10935759 3 304 TA:0.684211 T:0.263158  
TAA:0.0526316  
chr28 10935844 2 304 C:0.904605 T:0.0953947  
chr28 10936650 2 306 C:0.761438 T:0.238562  
chr28 10936790 2 296 A:0.621622 ACT:0.378378  
chr28 10936918 2 294 G:0.959184 A:0.0408163  
chr28 10937108 2 290 C:0.251724 T:0.748276  
chr28 10937631 2 298 T:0.61745 C:0.38255  
chr28 10937655 2 300 G:0.76 A:0.24  
chr28 10937749 2 296 C:0.871622 T:0.128378  
chr28 10937773 2 296 C:0.942568 CATTT:0.0574324  
chr28 10937780 3 302 T:0.251656 TTTTTTTTAA:  
0.655629 TTTTTTTTTTAA:0.0927152  
chr28 10937947 2 290 G:0.62069 A:0.37931  
chr28 10938016 2 306 T:0.872549 C:0.127451  
chr28 10938156 2 266 G:0.951128 A:0.0488722  
chr28 10938218 2 292 CTCTCTCCCT:0.804795 C:  
0.195205  
chr28 10938220 2 294 CTCTCCCT:0.908163 C:  
0.0918367  
chr28 10938222 3 300 CTCCCT:0.64 CTCCCT:0.34  
C:0.02  
chr28 10938223 2 314 T:0.888535 TC:0.111465  
chr28 10938226 2 308 C:0.545455 T:0.454545  
chr28 10938228 2 310 T:0.493548 TC:0.506452  
chr28 10938232 2 296 C:0.733108 G:0.266892  
chr28 10938234 2 310 G:0.958065 C:0.0419355  
chr28 10938284 2 304 G:0.927632 GAAAGA:0.0723684  
chr28 10938529 4 320  
TTTTCTTTCTTTCTTTCTTTCTTTCTTTCTTTCTTTCTTTTC:0.18125 T:0.68125  
TTTTCTTTTC:0.08125  
TTTTCTTTCTTTCTTTCTTTCTTTCTTTCTTTCTTTCTTTCTTTCTTTTC:0.05625  
chr28 10938824 2 304 A:0.621711 G:0.378289  
chr28 10939148 2 308 C:0.753247 T:0.246753  
chr28 10939244 2 316 T:0.411392 G:0.588608  
chr28 10939253 2 316 G:0.262658 A:0.737342  
chr28 10939350 2 308 A:0.24026 G:0.75974  
chr28 10939452 2 300 A:0.913333 G:0.0866667  
chr28 10939519 2 300 A:0.966667 G:0.0333333  
chr28 10939720 2 298 G:0.996644 A:0.0033557  
chr28 10940564 2 300 C:0.99 T:0.01  
chr28 10940679 2 296 C:0.760135 T:0.239865  
chr28 10941347 2 302 C:0.251656 T:0.748344  
chr28 10941594 2 294 C:0.982993 T:0.0170068  
chr28 10941647 2 302 G:0.271523 GCTCT:0.728477  
chr28 10942341 2 306 G:0.957516 C:0.0424837  
chr28 10942723 2 304 C:0.904605 T:0.0953947  
chr28 10942928 2 314 T:0.958599 G:0.0414013  
chr28 10943113 2 300 G:0.763333 A:0.236667  
chr28 10943289 2 310 C:0.73871 G:0.26129  
chr28 10943290 2 310 A:0.73871 G:0.26129  
chr28 10943378 2 304 A:0.726974 G:0.273026  
chr28 10943556 2 282 T:0.758865 C:0.241135

|            |          |   |     |                           |              |
|------------|----------|---|-----|---------------------------|--------------|
| chr28      | 10943966 | 2 | 312 | A:0.746795                | G:0.253205   |
| chr28      | 10943989 | 2 | 306 | A:0.748366                | G:0.251634   |
| chr28      | 10944846 | 2 | 306 | C:0.339869                | T:0.660131   |
| chr28      | 10944878 | 2 | 314 | C:0.869427                | A:0.130573   |
| chr28      | 10945075 | 2 | 296 | G:0.986486                | A:0.0135135  |
| chr28      | 10945214 | 2 | 296 | T:0.280405                | C:0.719595   |
| chr28      | 10945434 | 2 | 284 | G:0.369718                | A:0.630282   |
| chr28      | 10946291 | 2 | 290 | C:0.386207                | T:0.613793   |
| chr28      | 10946391 | 2 | 274 | G:0.335766                | A:0.664234   |
| chr28      | 10946568 | 2 | 190 | A:0.2                     | G:0.8        |
| chr28      | 10946632 | 2 | 162 | A:0.117284                | G:0.882716   |
| chr28      | 10948332 | 2 | 272 | C:0.856618                | T:0.143382   |
| chr28      | 10948399 | 2 | 230 | C:0.8                     | CT:0.2       |
| chr28      | 10948404 | 2 | 230 | C:0.8                     | CCG:0.2      |
| chr28      | 10948410 | 2 | 230 | T:0.8                     | C:0.2        |
| chr28      | 10949030 | 2 | 312 | ACAGCTGGCC:0.942308       | A:           |
| 0.0576923  |          |   |     |                           |              |
| chr28      | 10949135 | 2 | 308 | T:0.762987                | A:0.237013   |
| chr28      | 10949245 | 2 | 304 | T:0.746711                | C:0.253289   |
| chr28      | 10949618 | 2 | 296 | A:0.972973                | G:0.027027   |
| chr28      | 10949636 | 2 | 278 | T:0.816547                | TA:0.183453  |
| chr28      | 10949827 | 2 | 306 | C:0.901961                | T:0.0980392  |
| chr28      | 10949911 | 2 | 300 | A:0.563333                | C:0.436667   |
| chr28      | 10950059 | 2 | 294 | C:0.942177                | T:0.0578231  |
| chr28      | 10950206 | 2 | 304 | A:0.986842                | C:0.0131579  |
| chr28      | 10950222 | 2 | 304 | G:0.763158                | A:0.236842   |
| chr28      | 10950323 | 2 | 292 | C:0.917808                | G:0.0821918  |
| chr28      | 10950328 | 2 | 296 | C:0.753378                | T:0.246622   |
| chr28      | 10950411 | 2 | 292 | C:0.732877                | G:0.267123   |
| chr28      | 10950548 | 2 | 294 | C:0.744898                | T:0.255102   |
| chr28      | 10950605 | 2 | 298 | C:0.996644                | G:0.0033557  |
| chr28      | 10951080 | 2 | 294 | C:0.751701                | A:0.248299   |
| chr28      | 10951082 | 2 | 294 | G:0.751701                | A:0.248299   |
| chr28      | 10951248 | 2 | 304 | A:0.983553                | G:0.0164474  |
| chr28      | 10951424 | 2 | 316 | ACCCTGCATGGTTTAC:0.943038 | A:           |
| 0.056962   |          |   |     |                           |              |
| chr28      | 10951510 | 2 | 298 | C:0.744966                | G:0.255034   |
| chr28      | 10952305 | 2 | 298 | A:0.966443                | C:0.033557   |
| chr28      | 10952502 | 3 | 306 | A:0.761438                | C:0.00653595 |
| G:0.232026 |          |   |     |                           |              |
| chr28      | 10952514 | 2 | 306 | A:0.993464                | G:0.00653595 |
| chr28      | 10952562 | 2 | 294 | C:0.996599                | G:0.00340136 |
| chr28      | 10952625 | 2 | 310 | G:0.990323                | C:0.00967742 |
| chr28      | 10952637 | 2 | 302 | GTA:0.735099              | G:0.264901   |
| chr28      | 10952639 | 2 | 310 | A:0.990323                | G:0.00967742 |
| chr28      | 10952815 | 2 | 302 | T:0.738411                | C:0.261589   |
| chr28      | 10952979 | 2 | 298 | A:0.761745                | G:0.238255   |
| chr28      | 10953058 | 2 | 298 | A:0.919463                | T:0.0805369  |
| chr28      | 10953067 | 2 | 306 | T:0.915033                | A:0.0849673  |
| chr28      | 10953068 | 2 | 306 | T:0.748366                | A:0.251634   |
| chr28      | 10953078 | 2 | 294 | AAAAAT:0.962585           | A:0.037415   |
| chr28      | 10953092 | 2 | 306 | A:0.748366                | G:0.251634   |
| chr28      | 10953185 | 2 | 250 | C:0.816                   | CA:0.184     |
| chr28      | 10953242 | 2 | 224 | T:0.78125                 | C:0.21875    |

|                                 |          |   |     |                              |                 |
|---------------------------------|----------|---|-----|------------------------------|-----------------|
| chr28                           | 10953533 | 2 | 204 | G:0.838235                   | T:0.161765      |
| chr28                           | 10953616 | 2 | 228 | C:0.820175                   | A:0.179825      |
| chr28                           | 10953773 | 2 | 318 | G:0.908805                   | GAGTGTGGA:      |
| 0.091195                        |          |   |     |                              |                 |
| chr28                           | 10953774 | 2 | 318 | C:0.889937                   |                 |
| CCACCCATGGCATAGCCAGCAT:0.110063 |          |   |     |                              |                 |
| chr28                           | 10954058 | 2 | 292 | C:0.787671                   | T:0.212329      |
| chr28                           | 10954059 | 2 | 292 | A:0.787671                   | G:0.212329      |
| chr28                           | 10954098 | 2 | 308 | C:0.233766                   | CAGGGA:0.766234 |
| chr28                           | 10954143 | 2 | 308 | T:0.795455                   | A:0.204545      |
| chr28                           | 10954226 | 2 | 292 | T:0.804795                   | TTTTA:0.195205  |
| chr28                           | 10954538 | 2 | 288 | G:0.600694                   | C:0.399306      |
| chr28                           | 10954668 | 2 | 294 | C:0.880952                   | T:0.119048      |
| chr28                           | 10954711 | 2 | 300 | A:0.99                       | AATT:0.01       |
| chr28                           | 10954733 | 2 | 294 | C:0.979592                   | T:0.0204082     |
| chr28                           | 10954773 | 2 | 300 | AGGCG:0.246667               | A:0.753333      |
| chr28                           | 10955057 | 2 | 302 | T:0.731788                   | C:0.268212      |
| chr28                           | 10955111 | 2 | 294 | CACG:0.632653                | C:0.367347      |
| chr28                           | 10955169 | 2 | 298 | A:0.355705                   | G:0.644295      |
| chr28                           | 10955289 | 2 | 300 | G:0.0833333                  | C:0.916667      |
| chr28                           | 10955498 | 2 | 304 | GAC:0.907895                 | G:0.0921053     |
| chr28                           | 10955581 | 2 | 306 | G:0.911765                   | A:0.0882353     |
| chr28                           | 10955860 | 2 | 292 | G:0.705479                   | T:0.294521      |
| chr28                           | 10955862 | 2 | 292 | A:0.705479                   | G:0.294521      |
| chr28                           | 10956211 | 2 | 298 | A:0.577181                   | C:0.422819      |
| chr28                           | 10956220 | 2 | 296 | C:0.831081                   | T:0.168919      |
| chr28                           | 10956406 | 2 | 312 | AGTGATTTTTTTTACCTTG:0.557692 |                 |
| A:0.442308                      |          |   |     |                              |                 |
| chr28                           | 10956444 | 2 | 310 | T:0.822581                   | A:0.177419      |
| chr28                           | 10956472 | 3 | 296 | C:0.635135                   | CAG:0.0912162   |
| CAGAGAG:0.273649                |          |   |     |                              |                 |
| chr28                           | 10956634 | 2 | 274 | AT:0.821168                  | A:0.178832      |
| chr28                           | 10956653 | 2 | 286 | A:0.573427                   | T:0.426573      |
| chr28                           | 10956654 | 2 | 286 | A:0.573427                   | T:0.426573      |
| chr28                           | 10956764 | 2 | 306 | A:0.385621                   | AT:0.614379     |
| chr28                           | 10956893 | 2 | 264 | G:0.784091                   | A:0.215909      |
| chr28                           | 10956988 | 2 | 304 | A:0.368421                   | G:0.631579      |
| chr28                           | 10957438 | 2 | 292 | G:0.917808                   | A:0.0821918     |
| chr28                           | 10957724 | 2 | 298 | T:0.627517                   | G:0.372483      |
| chr28                           | 10957781 | 2 | 288 | C:0.680556                   | CT:0.319444     |
| chr28                           | 10957792 | 2 | 284 | G:0.443662                   | T:0.556338      |
| chr28                           | 10957793 | 2 | 288 | GAA:0.680556                 | G:0.319444      |
| chr28                           | 10957794 | 2 | 284 | A:0.802817                   | G:0.197183      |
| chr28                           | 10957804 | 2 | 294 | A:0.673469                   | T:0.326531      |
| chr28                           | 10958111 | 2 | 312 | G:0.419872                   | A:0.580128      |
| chr28                           | 10958233 | 2 | 298 | AT:0.681208                  | A:0.318792      |
| chr28                           | 10958332 | 2 | 288 | T:0.815972                   | G:0.184028      |
| chr28                           | 10958419 | 2 | 300 | C:0.83                       | A:0.17          |
| chr28                           | 10958530 | 3 | 294 | CT:0.520408                  | C:0.29932       |
| CTT:0.180272                    |          |   |     |                              |                 |
| chr28                           | 10958549 | 3 | 264 | CTT:0.443182                 | C:0.155303      |
| CT:0.401515                     |          |   |     |                              |                 |
| chr28                           | 10958909 | 2 | 304 | GGAC:0.930921                | G:0.0690789     |
| chr28                           | 10958913 | 2 | 304 | TCA:0.930921                 | T:0.0690789     |

|                                                     |          |   |     |                                 |                   |          |
|-----------------------------------------------------|----------|---|-----|---------------------------------|-------------------|----------|
| chr28                                               | 10959445 | 2 | 306 | C:0.405229                      | T:0.594771        |          |
| chr28                                               | 10959761 | 2 | 298 | T:0.979866                      | A:0.0201342       |          |
| chr28                                               | 10959870 | 2 | 310 | G:0.967742                      | C:0.0322581       |          |
| chr28                                               | 10959990 | 2 | 278 | G:0.838129                      | GAC:0.161871      |          |
| chr28                                               | 10960491 | 2 | 284 | TA:0.383803                     | T:0.616197        |          |
| chr28                                               | 10960645 | 2 | 300 | TCTA:0.97                       | T:0.03            |          |
| chr28                                               | 10960661 | 2 | 296 | C:0.547297                      | T:0.452703        |          |
| chr28                                               | 10960664 | 2 | 296 | T:0.547297                      | C:0.452703        |          |
| chr28                                               | 10960683 | 2 | 220 | CT:0.336364                     | C:0.663636        |          |
| chr28                                               | 10960719 | 3 | 300 | C:0.55                          | CAG:0.213333      | CAGAGAG: |
| 0.236667                                            |          |   |     |                                 |                   |          |
| chr28                                               | 10960739 | 2 | 278 | GGC:0.967626                    | G:0.0323741       |          |
| chr28                                               | 10961047 | 2 | 312 | T:0.705128                      | C:0.294872        |          |
| chr28                                               | 10961328 | 2 | 318 | T:0.72327                       |                   |          |
| TTTTTTTTGTTTGTTTTTTTTTTTTACATCAATAAAATCTTAA:0.27673 |          |   |     |                                 |                   |          |
| chr28                                               | 10961337 | 2 | 270 | ACC:0.559259                    | A:0.440741        |          |
| chr28                                               | 10961571 | 2 | 266 | T:0.447368                      | G:0.552632        |          |
| chr28                                               | 10961978 | 2 | 292 | C:0.945205                      | T:0.0547945       |          |
| chr28                                               | 10962777 | 2 | 258 | T:0.468992                      | C:0.531008        |          |
| chr28                                               | 10962807 | 2 | 316 | CGATCCTGGAGACCCGGGATCG:0.753165 |                   |          |
| C:0.246835                                          |          |   |     |                                 |                   |          |
| chr28                                               | 10962928 | 2 | 308 | TTAAAAAAA:0.951299              | T:                |          |
| 0.0487013                                           |          |   |     |                                 |                   |          |
| chr28                                               | 10962929 | 2 | 310 | T:0.909677                      | TA:0.0903226      |          |
| chr28                                               | 10962938 | 2 | 308 | T:0.522727                      | TA:0.477273       |          |
| chr28                                               | 10962939 | 2 | 308 | A:0.99026                       | AT:0.00974026     |          |
| chr28                                               | 10963007 | 2 | 298 | A:0.949664                      | G:0.0503356       |          |
| chr28                                               | 10963122 | 2 | 292 | A:0.914384                      | G:0.0856164       |          |
| chr28                                               | 10963320 | 2 | 298 | CAA:0.818792                    | C:0.181208        |          |
| chr28                                               | 10963342 | 2 | 300 | G:0.546667                      | C:0.453333        |          |
| chr28                                               | 10963556 | 2 | 306 | C:0.79085                       | CT:0.20915        |          |
| chr28                                               | 10963558 | 2 | 318 | T:0.902516                      | TTCTTTC:0.0974843 |          |
| chr28                                               | 10964557 | 2 | 294 | GC:0.816327                     | G:0.183673        |          |
| chr28                                               | 10964800 | 2 | 292 | C:0.787671                      | T:0.212329        |          |
| chr28                                               | 10964924 | 2 | 308 | T:0.974026                      | C:0.025974        |          |
| chr28                                               | 10965013 | 2 | 290 | C:0.910345                      | CT:0.0896552      |          |
| chr28                                               | 10965016 | 2 | 302 | T:0.589404                      | TTTTTC:0.410596   |          |
| chr28                                               | 10965062 | 2 | 306 | C:0.401961                      | G:0.598039        |          |
| chr28                                               | 10965153 | 2 | 288 | G:0.975694                      | A:0.0243056       |          |
| chr28                                               | 10965483 | 2 | 276 | A:0.637681                      | ACC:0.362319      |          |
| chr28                                               | 10965485 | 2 | 290 | C:0.786207                      | CCT:0.213793      |          |
| chr28                                               | 10965491 | 2 | 282 | C:0.638298                      | CCA:0.361702      |          |
| chr28                                               | 10965492 | 2 | 290 | A:0.786207                      | C:0.213793        |          |
| chr28                                               | 10965784 | 2 | 276 | AAGG:0.884058                   | A:0.115942        |          |
| chr28                                               | 10966005 | 2 | 260 | A:0.807692                      | G:0.192308        |          |
| chr28                                               | 10966282 | 2 | 186 | G:0.774194                      | C:0.225806        |          |
| chr28                                               | 10966579 | 2 | 234 | G:0.106838                      | A:0.893162        |          |
| chr28                                               | 10966622 | 2 | 280 | A:0.889286                      | G:0.110714        |          |
| chr28                                               | 10966652 | 2 | 272 | G:0.926471                      | A:0.0735294       |          |
| chr28                                               | 10966710 | 2 | 262 | T:0.89313                       | C:0.10687         |          |
| chr28                                               | 10966731 | 2 | 284 | G:0.806338                      | T:0.193662        |          |
| chr28                                               | 10966732 | 2 | 284 | A:0.806338                      | T:0.193662        |          |
| chr28                                               | 10966981 | 2 | 304 | G:0.457237                      | A:0.542763        |          |
| chr28                                               | 10967204 | 2 | 300 | G:0.896667                      | A:0.103333        |          |

|              |            |             |                                    |                    |
|--------------|------------|-------------|------------------------------------|--------------------|
| chr28        | 10967625 2 | 316         | C:0.490506                         | T:0.509494         |
| chr28        | 10967688 2 | 314         | A:0.16879                          | G:0.83121          |
| chr28        | 10967758 2 | 280         | G:0.817857                         | C:0.182143         |
| chr28        | 10967940 2 | 304         | T:0.523026                         | C:0.476974         |
| chr28        | 10967997 2 | 306         | T:0.375817                         | C:0.624183         |
| chr28        | 10968267 2 | 312         | A:0.852564                         | T:0.147436         |
| chr28        | 10968892 2 | 314         | A:0.990446                         | G:0.00955414       |
| chr28        | 10969042 2 | 312         | T:0.964744                         | C:0.0352564        |
| chr28        | 10969128 2 | 314         | G:0.490446                         | A:0.509554         |
| chr28        | 10969133 2 | 316         | T:0.325949                         | C:0.674051         |
| chr28        | 10969630 2 | 298         | A:0.513423                         | G:0.486577         |
| chr28        | 10969949 2 | 306         | A:0.503268                         | ATTGT:0.496732     |
| chr28        | 10969976 2 | 304         | G:0.822368                         | A:0.177632         |
| chr28        | 10970109 2 | 292         | G:0.945205                         | A:0.0547945        |
| chr28        | 10970473 2 | 298         | T:0.325503                         | C:0.674497         |
| chr28        | 10970631 2 | 304         | T:0.473684                         | A:0.526316         |
| chr28        | 10970698 2 | 304         | G:0.476974                         | A:0.523026         |
| chr28        | 10971002 2 | 292         | A:0.989726                         | C:0.010274         |
| chr28        | 10971194 2 | 294         | CAG:0.496599                       | C:0.503401         |
| chr28        | 10971312 2 | 292         | C:0.866438                         | T:0.133562         |
| chr28        | 10971398 2 | 304         | G:0.947368                         | A:0.0526316        |
| chr28        | 10972104 2 | 296         | G:0.466216                         | A:0.533784         |
| chr28        | 10972185 4 | 302         | ATTT:0.195364                      | AT:0.201987        |
| ATT:0.543046 |            | A:0.0596026 |                                    |                    |
| chr28        | 10972211 4 | 318         | CTTTATTTATTTATTTATTTATTTATTTATTTA: |                    |
| 0.292453     |            | C:0.248428  |                                    | CTTTATTTA:0.119497 |
| 0.339623     |            |             |                                    | CTTTATTTATTTA:     |
| chr28        | 10972309 2 | 300         | T:0.47                             | C:0.53             |
| chr28        | 10972350 2 | 290         | C:0.510345                         | T:0.489655         |
| chr28        | 10972364 2 | 292         | C:0.815068                         | T:0.184932         |
| chr28        | 10972567 2 | 308         | G:0.814935                         | A:0.185065         |
| chr28        | 10972570 2 | 306         | G:0.493464                         | T:0.506536         |
| chr28        | 10972747 2 | 314         | GCCATCTTTTTCTGAAAAAGC:0.850318     |                    |
| G:0.149682   |            |             |                                    |                    |
| chr28        | 10972778 2 | 300         | T:0.33                             | TC:0.67            |
| chr28        | 10972787 2 | 300         | G:0.33                             | GTGGT:0.67         |
| chr28        | 10973528 2 | 300         | G:0.526667                         | A:0.473333         |
| chr28        | 10973608 2 | 302         | A:0.539735                         | G:0.460265         |
| chr28        | 10973714 2 | 294         | G:0.972789                         | T:0.0272109        |
| chr28        | 10973828 2 | 286         | C:0.888112                         | T:0.111888         |
| chr28        | 10974020 2 | 288         | C:0.496528                         | A:0.503472         |
| chr28        | 10974066 2 | 280         | C:0.435714                         | T:0.564286         |
| chr28        | 10974133 2 | 284         | C:0.827465                         | T:0.172535         |
| chr28        | 10974294 2 | 306         | C:0.51634                          | T:0.48366          |
| chr28        | 10974322 2 | 294         | C:0.527211                         | T:0.472789         |
| chr28        | 10974417 2 | 302         | G:0.94702                          | A:0.0529801        |
| chr28        | 10974622 2 | 312         | T:0.467949                         | TC:0.532051        |
| chr28        | 10974634 2 | 312         | T:0.467949                         | C:0.532051         |
| chr28        | 10974958 2 | 320         | T:0.49375                          | TTTC:0.50625       |
| chr28        | 10975024 3 | 294         | GTTT:0.636054                      | G:0.217687         |
| GT:0.146259  |            |             |                                    |                    |
| chr28        | 10975261 2 | 306         | G:0.96732                          | A:0.0326797        |
| chr28        | 10975398 2 | 304         | T:0.506579                         | C:0.493421         |
| chr28        | 10975516 2 | 304         | A:0.503289                         | G:0.496711         |

|                      |            |             |                 |                  |
|----------------------|------------|-------------|-----------------|------------------|
| chr28                | 10975656 2 | 312         | G:0.820513      | A:0.179487       |
| chr28                | 10975693 2 | 304         | AT:0.851974     | A:0.148026       |
| chr28                | 10975698 2 | 306         | T:0.885621      | TA:0.114379      |
| chr28                | 10975702 4 | 306         | TAA:0.496732    | T:0.117647       |
| AAA:0.147059         |            | TA:0.238562 |                 |                  |
| chr28                | 10975704 2 | 302         | A:0.94702       | T:0.0529801      |
| chr28                | 10975763 2 | 284         | G:0.665493      | T:0.334507       |
| chr28                | 10976105 2 | 136         | GA:0 G:1        |                  |
| chr28                | 10976177 2 | 224         | TTATG:0.754464  | T:0.245536       |
| chr28                | 10976274 2 | 296         | TC:0.510135     | T:0.489865       |
| chr28                | 10976373 2 | 286         | C:0.842657      | T:0.157343       |
| chr28                | 10976533 2 | 226         | C:0.920354      | CAT:0.079646     |
| chr28                | 10976599 2 | 280         | G:0.460714      | C:0.539286       |
| chr28                | 10976600 2 | 280         | A:0.460714      | T:0.539286       |
| chr28                | 10976984 2 | 288         | T:0.121528      | C:0.878472       |
| chr28                | 10977233 3 | 302         | C:0.645695      | CAGAGAG:0.208609 |
| CAGAGAGAGAG:0.145695 |            |             |                 |                  |
| chr28                | 10977288 2 | 250         | T:0.504 C:0.496 |                  |
| chr28                | 10977367 2 | 286         | G:0.695804      | A:0.304196       |
| chr28                | 10977383 2 | 284         | CA:0.989437     | C:0.0105634      |
| chr28                | 10977384 2 | 290         | A:0.517241      | G:0.482759       |
| chr28                | 10977394 2 | 290         | T:0.517241      | A:0.482759       |
| chr28                | 10977396 2 | 290         | T:0.517241      | A:0.482759       |
| chr28                | 10977449 2 | 244         | CGACA:0.827869  | C:0.172131       |
| chr28                | 10977452 3 | 280         | CAG:0.771429    | C:0.132143       |
| GAG:0.0964286        |            |             |                 |                  |
| chr28                | 10977531 2 | 250         | CATG:0.516      | C:0.484          |
| chr28                | 10977593 2 | 274         | T:0.49635       | C:0.50365        |
| chr28                | 10978165 3 | 302         | T:0.347682      | C:0.155629       |
| G:0.496689           |            |             |                 |                  |
| chr28                | 10978203 2 | 296         | G:0.810811      | T:0.189189       |
| chr28                | 10978372 2 | 304         | G:0.996711      | A:0.00328947     |
| chr28                | 10978381 2 | 312         | A:0.945513      | C:0.0544872      |
| chr28                | 10978429 2 | 304         | C:0.467105      | CA:0.532895      |
| chr28                | 10978430 2 | 304         | C:0.901316      | T:0.0986842      |
| chr28                | 10978442 2 | 304         | G:0.467105      | GGTA:0.532895    |
| chr28                | 10978513 2 | 286         | A:0.486014      | C:0.513986       |
| chr28                | 10978703 2 | 278         | A:0.492806      | C:0.507194       |
| chr28                | 10979470 2 | 304         | C:0.976974      | T:0.0230263      |
| chr28                | 10979777 2 | 314         | G:0.496815      | GTCTT:0.503185   |
| chr28                | 10979849 2 | 312         | T:0.916667      | A:0.0833333      |
| chr28                | 10979907 2 | 302         | G:0.937086      | A:0.0629139      |
| chr28                | 10979981 2 | 304         | G:0.861842      | A:0.138158       |
| chr28                | 10980312 2 | 300         | G:0.876667      | T:0.123333       |
| chr28                | 10980412 2 | 306         | T:0.820261      | TA:0.179739      |
| chr28                | 10980524 2 | 310         | A:0.312903      | G:0.687097       |
| chr28                | 10980567 2 | 300         | T:0.483333      | A:0.516667       |
| chr28                | 10980625 2 | 294         | T:0.326531      | C:0.673469       |
| chr28                | 10981037 2 | 298         | A:0.530201      | G:0.469799       |
| chr28                | 10981304 2 | 306         | T:0.346405      | C:0.653595       |
| chr28                | 10981413 2 | 296         | T:0.189189      | C:0.810811       |
| chr28                | 10981744 2 | 302         | T:0.34106       | C:0.65894        |
| chr28                | 10981920 2 | 312         | C:0.839744      | T:0.160256       |
| chr28                | 10982003 2 | 302         | A:0.758278      | G:0.241722       |

|                                                  |            |     |                    |                |
|--------------------------------------------------|------------|-----|--------------------|----------------|
| chr28                                            | 10982720 2 | 298 | A:0.973154         | T:0.0268456    |
| chr28                                            | 10983100 2 | 294 | G:0.554422         | A:0.445578     |
| chr28                                            | 10983107 2 | 296 | G:0.351351         | A:0.648649     |
| chr28                                            | 10983144 2 | 298 | C:0.889262         | CTTCT:0.110738 |
| chr28                                            | 10983198 3 | 308 | CAGAGAG:0.467532   | C:0.383117     |
| CAGAGAGAG:0.149351                               |            |     |                    |                |
| chr28                                            | 10983293 2 | 276 | C:0.82971          | A:0.17029      |
| chr28                                            | 10983352 2 | 296 | CCTT:0.844595      | C:0.155405     |
| chr28                                            | 10983401 2 | 296 | A:0.510135         | G:0.489865     |
| chr28                                            | 10983418 2 | 302 | T:0.503311         | G:0.496689     |
| chr28                                            | 10983603 2 | 298 | G:0.503356         | A:0.496644     |
| chr28                                            | 10983637 2 | 304 | T:0.503289         | C:0.496711     |
| chr28                                            | 10983774 2 | 306 | A:0.496732         | AGTCC:0.503268 |
| chr28                                            | 10983818 2 | 314 | G:0.850318         | A:0.149682     |
| chr28                                            | 10983977 2 | 290 | G:0.893103         | A:0.106897     |
| chr28                                            | 10984009 2 | 298 | G:0.503356         | A:0.496644     |
| chr28                                            | 10984411 2 | 300 | C:0.466667         | T:0.533333     |
| chr28                                            | 10984568 2 | 304 | C:0.532895         | A:0.467105     |
| chr28                                            | 10984869 2 | 300 | G:0.453333         | A:0.546667     |
| chr28                                            | 10984997 2 | 298 | T:0.459732         | C:0.540268     |
| chr28                                            | 10985087 2 | 298 | C:0.513423         | T:0.486577     |
| chr28                                            | 10985273 4 | 314 | CTG:0.484076       | C:0.264331     |
| CTGTG:0.0477707 CTGTGTGTGTGTGTGTGTGTGTG:0.203822 |            |     |                    |                |
| chr28                                            | 10985285 2 | 316 | G:0.886076         |                |
| GTGTGTGTGTGTGTGTGTGTGTGTGTGTGTGTGTGT:0.113924    |            |     |                    |                |
| chr28                                            | 10985313 2 | 296 | A:0.537162         | G:0.462838     |
| chr28                                            | 10985337 2 | 296 | A:0.537162         | G:0.462838     |
| chr28                                            | 10985486 2 | 298 | A:0.47651          | C:0.52349      |
| chr28                                            | 10985523 2 | 290 | T:0.517241         | C:0.482759     |
| chr28                                            | 10985564 2 | 290 | C:0.47931          | CT:0.52069     |
| chr28                                            | 10985604 2 | 310 | AT:0.509677        | A:0.490323     |
| chr28                                            | 10985656 2 | 314 | T:0.33758          | C:0.66242      |
| chr28                                            | 10985748 2 | 296 | C:0.516892         | CT:0.483108    |
| chr28                                            | 10985921 2 | 304 | A:0.3125 AT:0.6875 |                |
| chr28                                            | 10986385 2 | 300 | C:0.826667         | T:0.173333     |
| chr28                                            | 10986427 2 | 296 | T:0.506757         | C:0.493243     |
| chr28                                            | 10986678 2 | 292 | T:0.479452         | G:0.520548     |
| chr28                                            | 10986718 2 | 298 | A:0.493289         | G:0.506711     |
| chr28                                            | 10986842 2 | 306 | G:0.826797         | A:0.173203     |
| chr28                                            | 10986885 2 | 306 | G:0.490196         | T:0.509804     |
| chr28                                            | 10987378 2 | 306 | C:0.493464         | A:0.506536     |
| chr28                                            | 10987477 2 | 296 | T:0.827703         | A:0.172297     |
| chr28                                            | 10987505 2 | 302 | T:0.543046         | G:0.456954     |
| chr28                                            | 10987590 2 | 308 | T:0.512987         | C:0.487013     |
| chr28                                            | 10987599 2 | 308 | C:0.512987         | G:0.487013     |
| chr28                                            | 10987920 2 | 286 | A:0.493007         | G:0.506993     |
| chr28                                            | 10987986 2 | 276 | T:0.521739         | C:0.478261     |
| chr28                                            | 10988012 2 | 288 | C:0.857639         | T:0.142361     |
| chr28                                            | 10988453 2 | 288 | C:0.815972         | CG:0.184028    |
| chr28                                            | 10988522 2 | 298 | C:0.88255          | T:0.11745      |
| chr28                                            | 10988580 2 | 298 | A:0.848993         | G:0.151007     |
| chr28                                            | 10988882 2 | 308 | C:0.831169         | T:0.168831     |
| chr28                                            | 10988978 2 | 306 | CT:0.320261        | C:0.679739     |
| chr28                                            | 10989264 2 | 302 | C:0.688742         | T:0.311258     |



|              |          |   |     |                 |                 |
|--------------|----------|---|-----|-----------------|-----------------|
| chr28        | 10989268 | 2 | 302 | C:0.688742      | T:0.311258      |
| chr28        | 10989464 | 2 | 304 | A:0.845395      | C:0.154605      |
| chr28        | 10989866 | 2 | 300 | C:0.833333      | A:0.166667      |
| chr28        | 10990280 | 2 | 290 | A:0.934483      | T:0.0655172     |
| chr28        | 10990637 | 2 | 302 | T:0.877483      | G:0.122517      |
| chr28        | 10990840 | 2 | 308 | A:0.834416      | G:0.165584      |
| chr28        | 10991115 | 2 | 304 | TTTC:0.901316   | T:0.0986842     |
| chr28        | 10991142 | 3 | 290 | T:0.703448      | TA:0.158621     |
| TAA:0.137931 |          |   |     |                 |                 |
| chr28        | 10991340 | 2 | 294 | T:0.704082      | C:0.295918      |
| chr28        | 10991590 | 2 | 308 | G:0.993506      | A:0.00649351    |
| chr28        | 10991684 | 2 | 304 | A:0.855263      | T:0.144737      |
| chr28        | 10991696 | 2 | 304 | T:0.855263      | C:0.144737      |
| chr28        | 10991738 | 2 | 298 | A:0.842282      | G:0.157718      |
| chr28        | 10991766 | 2 | 302 | A:0.821192      | G:0.178808      |
| chr28        | 10991773 | 2 | 302 | G:0.821192      | A:0.178808      |
| chr28        | 10991800 | 2 | 296 | A:0.550676      | G:0.449324      |
| chr28        | 10991874 | 2 | 302 | A:0.81457       | C:0.18543       |
| chr28        | 10992336 | 2 | 286 | C:0.839161      | T:0.160839      |
| chr28        | 10992547 | 2 | 262 | G:0.851145      | A:0.148855      |
| chr28        | 10992571 | 2 | 274 | C:0.850365      | A:0.149635      |
| chr28        | 10992572 | 2 | 274 | CG:0.850365     | C:0.149635      |
| chr28        | 10992573 | 2 | 272 | G:0.893382      | C:0.106618      |
| chr28        | 10992700 | 2 | 288 | T:0.118056      | C:0.881944      |
| chr28        | 10992714 | 2 | 290 | C:0.286207      | T:0.713793      |
| chr28        | 10992715 | 2 | 288 | G:0.836806      | A:0.163194      |
| chr28        | 10992822 | 2 | 282 | G:0.847518      | GC:0.152482     |
| chr28        | 10993329 | 2 | 304 | GC:0.871711     | G:0.128289      |
| chr28        | 10993330 | 2 | 302 | CCCCAG:0.261589 | C:0.738411      |
| chr28        | 10993332 | 2 | 302 | C:0.877483      | CTG:0.122517    |
| chr28        | 10993333 | 2 | 302 | CAG:0.877483    | C:0.122517      |
| chr28        | 10993335 | 2 | 304 | G:0.871711      | GC:0.128289     |
| chr28        | 10993525 | 2 | 268 | A:0.955224      | G:0.0447761     |
| chr28        | 10993669 | 2 | 240 | A:0.920833      | G:0.0791667     |
| chr28        | 10993730 | 2 | 274 | G:0.967153      | GGTGT:0.0328467 |
| chr28        | 10993759 | 2 | 222 | GTA:0.882883    | G:0.117117      |
| chr28        | 10993761 | 2 | 220 | A:0.918182      | G:0.0818182     |
| chr28        | 10993763 | 2 | 228 | A:0.95614       | G:0.0438596     |
| chr28        | 10993946 | 2 | 292 | GA:0.280822     | G:0.719178      |
| chr28        | 10994209 | 2 | 294 | TA:0.806122     | T:0.193878      |
| chr28        | 10994309 | 2 | 294 | C:0.721088      | T:0.278912      |
| chr28        | 10994311 | 2 | 294 | A:0.721088      | G:0.278912      |
| chr28        | 10994906 | 2 | 296 | G:0.108108      | A:0.891892      |
| chr28        | 10995117 | 2 | 292 | G:0.996575      | A:0.00342466    |
| chr28        | 10995247 | 2 | 290 | T:0.317241      | G:0.682759      |
| chr28        | 10995395 | 2 | 292 | C:0.119863      | G:0.880137      |
| chr28        | 10995495 | 2 | 296 | A:0.692568      | G:0.307432      |
| chr28        | 10995595 | 2 | 274 | A:0.894161      | C:0.105839      |
| chr28        | 10995777 | 2 | 212 | CTG:0.839623    | C:0.160377      |
| chr28        | 10996035 | 2 | 268 | G:0.873134      | C:0.126866      |
| chr28        | 10996211 | 2 | 294 | A:0.894558      | AG:0.105442     |
| chr28        | 10996475 | 2 | 300 | G:0.97 A:0.03   |                 |
| chr28        | 10996540 | 2 | 292 | A:0.0993151     | T:0.900685      |
| chr28        | 10996665 | 2 | 298 | C:0.812081      | T:0.187919      |

|       |                                             |     |                               |                     |
|-------|---------------------------------------------|-----|-------------------------------|---------------------|
| chr28 | 10996729 2                                  | 298 | C:0.332215                    | T:0.667785          |
| chr28 | 10996829 2                                  | 292 | A:0.876712                    | G:0.123288          |
| chr28 | 10996877 6                                  | 316 | CGTGTGTGTGTGTGTGT:0.243671    |                     |
|       | C:0.367089                                  |     | CGTGTGT:0.107595              | CGTGTGTGT:0.0791139 |
|       | CGTGTGTGTGTGTGT:0.110759                    |     | CGTGTGTGTGTGTGTGTGT:0.0917722 |                     |
| chr28 | 10996947 2                                  | 288 | A:0.71875                     | G:0.28125           |
| chr28 | 10997231 2                                  | 296 | A:0.85473                     | G:0.14527           |
| chr28 | 10997649 2                                  | 300 | G:0.163333                    | GT:0.836667         |
| chr28 | 10997759 2                                  | 300 | A:0.1                         | G:0.9               |
| chr28 | 10997837 2                                  | 298 | T:0.691275                    | C:0.308725          |
| chr28 | 10997840 2                                  | 300 | GCC:0.83                      | G:0.17              |
| chr28 | 10997871 2                                  | 300 | C:0.81                        | G:0.19              |
| chr28 | 10997960 2                                  | 310 | GGCTCTCTCTCCCCT:0.132258      | G:                  |
|       | 0.867742                                    |     |                               |                     |
| chr28 | 10998658 2                                  | 294 | ATG:0.982993                  | A:0.0170068         |
| chr28 | 10998674 2                                  | 298 | G:0.701342                    | GT:0.298658         |
| chr28 | 10998675 3                                  | 312 | G:0.714744                    | GT:0.173077         |
|       | GTGTGTGT:0.112179                           |     |                               |                     |
| chr28 | 10998719 2                                  | 288 | C:0.892361                    | T:0.107639          |
| chr28 | 10998878 2                                  | 264 | A:0.784091                    | G:0.215909          |
| chr28 | 10998898 2                                  | 270 | T:0.751852                    | C:0.248148          |
| chr28 | 10998904 2                                  | 270 | T:0.751852                    | C:0.248148          |
| chr28 | 10998976 2                                  | 260 | G:0.111538                    | C:0.888462          |
| chr28 | 10999062 2                                  | 208 | C:0.230769                    | CG:0.769231         |
| chr28 | 10999116 2                                  | 182 | CGT:0.521978                  | C:0.478022          |
| chr28 | 10999539 2                                  | 70  | G:0                           | GT:1                |
| chr28 | 11000448 2                                  | 272 | G:0.595588                    | A:0.404412          |
| chr28 | 11000873 2                                  | 306 | G:0.875817                    | T:0.124183          |
| chr28 | 11000897 2                                  | 308 | G:0.938312                    | A:0.0616883         |
| chr28 | 11001070 2                                  | 290 | G:0.986207                    | T:0.0137931         |
| chr28 | 11001281 2                                  | 300 | G:0.143333                    | A:0.856667          |
| chr28 | 11001339 2                                  | 304 | A:0.131579                    | G:0.868421          |
| chr28 | 11001408 2                                  | 312 | GTTCC:0.153846                | G:0.846154          |
| chr28 | 11001623 2                                  | 304 | T:0.983553                    | C:0.0164474         |
| chr28 | 11001813 2                                  | 292 | T:0.119863                    | C:0.880137          |
| chr28 | 11001908 2                                  | 296 | C:0.922297                    | T:0.0777027         |
| chr28 | 11001982 2                                  | 298 | C:0.869128                    | T:0.130872          |
| chr28 | 11002146 2                                  | 294 | A:0.986395                    | AC:0.0136054        |
| chr28 | 11002454 2                                  | 310 | AAACAAC:0.645161              | A:0.354839          |
| chr28 | 11002457 2                                  | 314 | C:0.5                         | T:0.5               |
| chr28 | 11002463 2                                  | 310 | C:0.645161                    | T:0.354839          |
| chr28 | 11002469 2                                  | 314 | CAACAACAAT:0.5                | C:0.5               |
| chr28 | 11003002 4                                  | 306 | A:0.147059                    | AT:0.297386         |
|       | ATT:0.513072                                |     | ATTTT:0.0424837               |                     |
| chr28 | 11003098 2                                  | 308 | A:0.912338                    |                     |
|       | AACTAAATTTTGCTTATTAATAAAATTTTAAAC:0.0876623 |     |                               |                     |
| chr28 | 11003273 2                                  | 304 | AAAAT:0.986842                | A:0.0131579         |
| chr28 | 11003288 2                                  | 316 | A:0.96519                     | AT:0.0348101        |
| chr28 | 11003289 2                                  | 306 | TAAA:0.98366                  | T:0.0163399         |
| chr28 | 11003290 2                                  | 316 | A:0.96519                     | AATT:0.0348101      |
| chr28 | 11003293 2                                  | 306 | TA:0.98366                    | T:0.0163399         |
| chr28 | 11003294 2                                  | 306 | A:0.830065                    | T:0.169935          |
| chr28 | 11003334 2                                  | 294 | A:0.986395                    | C:0.0136054         |
| chr28 | 11003363 2                                  | 302 | A:0.874172                    | G:0.125828          |

|                             |            |     |                       |                   |
|-----------------------------|------------|-----|-----------------------|-------------------|
| chr28                       | 11003468 2 | 304 | GTTTCTTTTCTTCC:0.9375 | G:0.0625          |
| chr28                       | 11003555 2 | 314 | T:0.528662            | TCTA:0.471338     |
| chr28                       | 11003575 2 | 314 | A:0.859873            | G:0.140127        |
| chr28                       | 11003578 2 | 314 | C:0.993631            | T:0.00636943      |
| chr28                       | 11003603 2 | 282 | C:0.804965            | CT:0.195035       |
| chr28                       | 11003607 2 | 312 | T:0.990385            | C:0.00961538      |
| chr28                       | 11003633 3 | 304 | C:0.161184            | CAGAGAG:0.819079  |
| CAGAGAGAGAG:0.0197368       |            |     |                       |                   |
| chr28                       | 11003635 2 | 316 | G:0.974684            | GAGAGAA:0.0253165 |
| chr28                       | 11003644 2 | 294 | T:0.142857            | TGA:0.857143      |
| chr28                       | 11003846 2 | 284 | C:0.179577            | CTT:0.820423      |
| chr28                       | 11004025 2 | 282 | G:0.975177            | A:0.0248227       |
| chr28                       | 11004046 2 | 288 | G:0.982639            | A:0.0173611       |
| chr28                       | 11004192 2 | 296 | C:0.898649            | T:0.101351        |
| chr28                       | 11004311 2 | 284 | G:0.116197            | A:0.883803        |
| chr28                       | 11004606 2 | 296 | A:0.972973            | G:0.027027        |
| chr28                       | 11004722 2 | 298 | G:0.88255             | A:0.11745         |
| chr28                       | 11004801 2 | 304 | C:0.967105            | A:0.0328947       |
| chr28                       | 11005123 2 | 302 | T:0.115894            | C:0.884106        |
| chr28                       | 11005235 2 | 290 | C:0.103448            | T:0.896552        |
| chr28                       | 11005298 2 | 300 | A:0.89 G:0.11         |                   |
| chr28                       | 11005327 2 | 310 | G:0.977419            | C:0.0225806       |
| chr28                       | 11005435 2 | 298 | T:0.909396            | C:0.090604        |
| chr28                       | 11005509 2 | 304 | G:0.980263            | A:0.0197368       |
| chr28                       | 11005663 2 | 302 | G:0.460265            | C:0.539735        |
| chr28                       | 11005676 2 | 306 | G:0.0849673           | A:0.915033        |
| chr28                       | 11006028 2 | 304 | T:0.865132            | C:0.134868        |
| chr28                       | 11006142 2 | 300 | C:0.136667            | T:0.863333        |
| chr28                       | 11006203 2 | 296 | T:0.121622            | C:0.878378        |
| chr28                       | 11006223 4 | 318 | C:0.116352            | CTGAA:0.0125786   |
| CTGAATGAACGAA:0.820755      |            |     |                       |                   |
| CTGAATGAACGAATGAA:0.0503145 |            |     |                       |                   |
| chr28                       | 11006246 2 | 318 | G:0.128931            | A:0.871069        |
| chr28                       | 11006397 2 | 302 | C:0.864238            | CT:0.135762       |
| chr28                       | 11006726 2 | 288 | T:0.121528            | C:0.878472        |
| chr28                       | 11006737 2 | 286 | AC:0.884615           | A:0.115385        |
| chr28                       | 11006739 2 | 278 | C:0.23741             | T:0.76259         |
| chr28                       | 11006741 2 | 286 | C:0.884615            | T:0.115385        |
| chr28                       | 11006750 2 | 284 | G:0.112676            | A:0.887324        |
| chr28                       | 11006751 2 | 284 | C:0.112676            | T:0.887324        |
| chr28                       | 11006837 2 | 296 | A:0.763514            | C:0.236486        |
| chr28                       | 11006936 2 | 304 | C:0.118421            | T:0.881579        |
| chr28                       | 11006979 2 | 300 | A:0.906667            | G:0.0933333       |
| chr28                       | 11006991 2 | 302 | A:0.907285            | G:0.0927152       |
| chr28                       | 11007002 2 | 298 | G:0.916107            | GGA:0.0838926     |
| chr28                       | 11007058 2 | 294 | A:0.884354            | T:0.115646        |
| chr28                       | 11007138 2 | 306 | C:0.888889            | T:0.111111        |
| chr28                       | 11007215 2 | 304 | T:0.0921053           | C:0.907895        |
| chr28                       | 11007601 2 | 286 | A:0.881119            | C:0.118881        |
| chr28                       | 11007664 2 | 284 | A:0.897887            | T:0.102113        |
| chr28                       | 11007697 2 | 298 | G:0.872483            | T:0.127517        |
| chr28                       | 11007727 2 | 290 | AG:0.868966           | A:0.131034        |
| chr28                       | 11007782 2 | 300 | A:0.89 G:0.11         |                   |
| chr28                       | 11007923 2 | 292 | C:0.136986            | G:0.863014        |
| chr28                       | 11008346 2 | 290 | T:0.12069             | C:0.87931         |

|                  |          |   |     |                |                  |
|------------------|----------|---|-----|----------------|------------------|
| chr28            | 11008356 | 2 | 304 | G:0.134868     | GC:0.865132      |
| chr28            | 11008376 | 2 | 294 | A:0.139456     | G:0.860544       |
| chr28            | 11008391 | 2 | 294 | T:0.108844     | A:0.891156       |
| chr28            | 11008404 | 2 | 292 | T:0.89726      | G:0.10274        |
| chr28            | 11008522 | 2 | 294 | A:0.0714286    | G:0.928571       |
| chr28            | 11008580 | 2 | 308 | G:0.12013      | A:0.87987        |
| chr28            | 11008589 | 2 | 308 | A:0.12013      | G:0.87987        |
| chr28            | 11008669 | 2 | 296 | AT:0.108108    | A:0.891892       |
| chr28            | 11008980 | 2 | 298 | A:0.852349     | G:0.147651       |
| chr28            | 11008999 | 2 | 300 | G:0.13 A:0.87  |                  |
| chr28            | 11009011 | 2 | 294 | AG:0.97619     | A:0.0238095      |
| chr28            | 11009048 | 2 | 284 | T:0.897887     | C:0.102113       |
| chr28            | 11009258 | 2 | 284 | G:0.830986     | A:0.169014       |
| chr28            | 11009314 | 2 | 284 | G:0.883803     | A:0.116197       |
| chr28            | 11009484 | 2 | 308 | G:0.113636     | C:0.886364       |
| chr28            | 11009729 | 2 | 302 | G:0.983444     | A:0.0165563      |
| chr28            | 11009792 | 2 | 292 | T:0.106164     | C:0.893836       |
| chr28            | 11009928 | 2 | 298 | A:0.993289     | C:0.00671141     |
| chr28            | 11010161 | 2 | 284 | A:0.116197     | G:0.883803       |
| chr28            | 11010227 | 2 | 288 | C:0.902778     | A:0.0972222      |
| chr28            | 11010228 | 2 | 290 | A:0.996552     | C:0.00344828     |
| chr28            | 11010301 | 2 | 272 | G:0.110294     | C:0.889706       |
| chr28            | 11010623 | 2 | 290 | C:0.103448     | T:0.896552       |
| chr28            | 11010763 | 2 | 296 | A:0.891892     | G:0.108108       |
| chr28            | 11010769 | 2 | 296 | A:0.891892     | G:0.108108       |
| chr28            | 11010775 | 2 | 300 | AAG:0.966667   | A:0.0333333      |
| chr28            | 11010793 | 2 | 300 | C:0.966667     | T:0.0333333      |
| chr28            | 11010810 | 2 | 316 | C:0.892405     | CCTTGGG:0.107595 |
| chr28            | 11010926 | 2 | 310 | T:0.893548     | C:0.106452       |
| chr28            | 11010949 | 2 | 310 | A:0.893548     | T:0.106452       |
| chr28            | 11011061 | 2 | 286 | C:0.982517     | T:0.0174825      |
| chr28            | 11011219 | 2 | 288 | T:0.111111     | C:0.888889       |
| chr28            | 11011252 | 2 | 296 | G:0.891892     | A:0.108108       |
| chr28            | 11011267 | 2 | 298 | G:0.147651     | A:0.852349       |
| chr28            | 11011340 | 3 | 314 | TAA:0.124204   | T:0.850318       |
| TAAAAA:0.0254777 |          |   |     |                |                  |
| chr28            | 11011350 | 2 | 312 | TAAAA:0.144231 | T:0.855769       |
| chr28            | 11011559 | 2 | 278 | G:0.104317     | A:0.895683       |
| chr28            | 11011876 | 2 | 274 | C:0.967153     | T:0.0328467      |
| chr28            | 11011927 | 2 | 282 | C:0.237589     | CCT:0.762411     |
| chr28            | 11011978 | 3 | 282 | T:0.379433     | TA:0.336879      |
| TAA:0.283688     |          |   |     |                |                  |
| chr28            | 11012037 | 2 | 310 | A:0.170968     | ATGTAGGCAGAGG:   |
| 0.829032         |          |   |     |                |                  |
| chr28            | 11012378 | 2 | 304 | A:0.871711     | G:0.128289       |
| chr28            | 11012386 | 2 | 304 | A:0.871711     | G:0.128289       |
| chr28            | 11012542 | 2 | 308 | G:0.905844     | C:0.0941558      |
| chr28            | 11013044 | 2 | 296 | A:0.118243     | C:0.881757       |
| chr28            | 11013094 | 2 | 280 | G:0.878571     | T:0.121429       |
| chr28            | 11013431 | 2 | 212 | G:0.924528     | T:0.0754717      |
| chr28            | 11013511 | 2 | 272 | C:0.0919118    | T:0.908088       |
| chr28            | 11013592 | 2 | 206 | G:0.81068      | A:0.18932        |
| chr28            | 11013647 | 2 | 252 | TTG:0.130952   | T:0.869048       |
| chr28            | 11013660 | 2 | 252 | G:0.130952     | C:0.869048       |

|                                         |          |   |     |                |               |
|-----------------------------------------|----------|---|-----|----------------|---------------|
| chr28                                   | 11014025 | 2 | 300 | C:0.126667     | G:0.873333    |
| chr28                                   | 11014797 | 2 | 266 | A:0.913534     | G:0.0864662   |
| chr28                                   | 11015379 | 2 | 298 | T:0.107383     | C:0.892617    |
| chr28                                   | 11015536 | 2 | 298 | C:0.989933     | T:0.0100671   |
| chr28                                   | 11015724 | 2 | 290 | C:0.972414     | T:0.0275862   |
| chr28                                   | 11015901 | 2 | 292 | A:0.979452     | T:0.0205479   |
| chr28                                   | 11015942 | 4 | 304 | C:0.746711     | CAG:0.0888158 |
| CAGAGAG:0.111842 CAGAGAGAG:0.0526316    |          |   |     |                |               |
| chr28                                   | 11015944 | 4 | 314 | C:0.394904     | G:0.254777    |
| CAGAGAGAG:0.226115 CAGAGAGAGAG:0.124204 |          |   |     |                |               |
| chr28                                   | 11015946 | 2 | 294 | C:0.258503     | G:0.741497    |
| chr28                                   | 11016331 | 2 | 286 | C:0.846154     | T:0.153846    |
| chr28                                   | 11016384 | 2 | 290 | C:0.889655     | T:0.110345    |
| chr28                                   | 11016567 | 2 | 296 | C:0.996622     | T:0.00337838  |
| chr28                                   | 11016701 | 2 | 226 | GGGT:0.743363  | G:0.256637    |
| chr28                                   | 11016702 | 2 | 226 | GGT:0.283186   | G:0.716814    |
| chr28                                   | 11017185 | 2 | 290 | T:0.97931      | C:0.0206897   |
| chr28                                   | 11017239 | 2 | 280 | G:0.446429     | A:0.553571    |
| chr28                                   | 11017242 | 2 | 284 | G:0.514085     | A:0.485915    |
| chr28                                   | 11017398 | 2 | 284 | T:0.975352     | C:0.0246479   |
| chr28                                   | 11017488 | 2 | 298 | C:0.513423     | G:0.486577    |
| chr28                                   | 11017968 | 2 | 308 | C:0.49026      | T:0.50974     |
| chr28                                   | 11018133 | 2 | 292 | C:0.513699     | T:0.486301    |
| chr28                                   | 11018217 | 2 | 304 | C:0.947368     | T:0.0526316   |
| chr28                                   | 11018324 | 2 | 296 | GT:0.993243    | G:0.00675676  |
| chr28                                   | 11018561 | 2 | 300 | C:0.773333     | T:0.226667    |
| chr28                                   | 11018591 | 2 | 292 | C:0.972603     | T:0.0273973   |
| chr28                                   | 11018792 | 2 | 294 | A:0.503401     | C:0.496599    |
| chr28                                   | 11018807 | 3 | 314 | TTTTA:0.665605 | T:0.216561    |
| TTTTATTTA:0.117834                      |          |   |     |                |               |
| chr28                                   | 11018811 | 2 | 308 | AT:0.974026    | A:0.025974    |
| chr28                                   | 11019252 | 2 | 304 | G:0.990132     | A:0.00986842  |
| chr28                                   | 11019519 | 2 | 302 | A:0.364238     | G:0.635762    |
| chr28                                   | 11019735 | 2 | 296 | C:0.0878378    | T:0.912162    |
| chr28                                   | 11020123 | 2 | 302 | G:0.771523     | A:0.228477    |
| chr28                                   | 11020179 | 2 | 304 | T:0.871711     | C:0.128289    |
| chr28                                   | 11020202 | 2 | 308 | GT:0.772727    | G:0.227273    |
| chr28                                   | 11020349 | 2 | 256 | G:0.207031     | GT:0.792969   |
| chr28                                   | 11020376 | 2 | 254 | C:0.748031     | T:0.251969    |
| chr28                                   | 11020781 | 2 | 268 | G:0.966418     | A:0.0335821   |
| chr28                                   | 11021012 | 2 | 296 | G:0.483108     | T:0.516892    |
| chr28                                   | 11021017 | 2 | 296 | G:0.483108     | A:0.516892    |
| chr28                                   | 11021468 | 2 | 290 | G:0.968966     | A:0.0310345   |
| chr28                                   | 11021915 | 2 | 302 | T:0.0927152    | G:0.907285    |
| chr28                                   | 11022233 | 2 | 302 | C:0.519868     | T:0.480132    |
| chr28                                   | 11022346 | 2 | 294 | A:0.734694     | G:0.265306    |
| chr28                                   | 11022767 | 2 | 270 | A:0.97037      | G:0.0296296   |
| chr28                                   | 11023439 | 2 | 306 | G:0.496732     | T:0.503268    |
| chr28                                   | 11023556 | 2 | 308 | C:0.876623     | T:0.123377    |
| chr28                                   | 11023666 | 2 | 298 | T:0.510067     | C:0.489933    |
| chr28                                   | 11023689 | 2 | 296 | T:0.516892     | C:0.483108    |
| chr28                                   | 11023703 | 2 | 294 | G:0.911565     | A:0.0884354   |
| chr28                                   | 11023783 | 2 | 306 | C:0.996732     | T:0.00326797  |
| chr28                                   | 11024066 | 2 | 300 | G:0.48 C:0.52  |               |

|       |          |   |     |             |              |
|-------|----------|---|-----|-------------|--------------|
| chr28 | 11024127 | 2 | 306 | T:0.973856  | A:0.0261438  |
| chr28 | 11024250 | 2 | 308 | T:0.461039  | G:0.538961   |
| chr28 | 11024596 | 2 | 292 | C:0.989726  | T:0.010274   |
| chr28 | 11024783 | 2 | 292 | A:0.496575  | AC:0.503425  |
| chr28 | 11025055 | 2 | 302 | C:0.976821  | T:0.0231788  |
| chr28 | 11025116 | 2 | 294 | T:0.493197  | G:0.506803   |
| chr28 | 11025149 | 2 | 300 | CA:0.986667 | C:0.0133333  |
| chr28 | 11025326 | 2 | 308 | AG:0.779221 | A:0.220779   |
| chr28 | 11025647 | 2 | 300 | G:0.876667  | A:0.123333   |
| chr28 | 11025713 | 2 | 312 | C:0.503205  | T:0.496795   |
| chr28 | 11026043 | 2 | 298 | C:0.446309  | CTA:0.553691 |
| chr28 | 11026217 | 2 | 294 | G:0.520408  | GC:0.479592  |
| chr28 | 11026485 | 2 | 298 | G:0.936242  | A:0.0637584  |
| chr28 | 11026700 | 2 | 298 | T:0.536913  | C:0.463087   |
| chr28 | 11026905 | 2 | 294 | G:0.959184  | A:0.0408163  |
| chr28 | 11027254 | 2 | 308 | G:0.438312  | A:0.561688   |
| chr28 | 11027319 | 2 | 312 | C:0.974359  | T:0.025641   |
| chr28 | 11027331 | 2 | 312 | TG:0.496795 | T:0.503205   |
| chr28 | 11027534 | 2 | 304 | C:0.980263  | T:0.0197368  |
| chr28 | 11027768 | 2 | 298 | C:0.577181  | G:0.422819   |
| chr28 | 11027837 | 2 | 296 | T:0.530405  | C:0.469595   |
| chr28 | 11028083 | 2 | 296 | T:0.679054  | G:0.320946   |
| chr28 | 11028211 | 2 | 308 | T:0.935065  | C:0.0649351  |
| chr28 | 11028231 | 2 | 308 | A:0.935065  | G:0.0649351  |
| chr28 | 11028232 | 2 | 308 | G:0.935065  | C:0.0649351  |
| chr28 | 11028451 | 2 | 300 | T:0.2       | C:0.8        |
| chr28 | 11028454 | 2 | 300 | C:0.2       | T:0.8        |
| chr28 | 11028918 | 2 | 314 | A:0.764331  | G:0.235669   |
| chr28 | 11029112 | 2 | 298 | C:0.95302   | T:0.0469799  |
| chr28 | 11029411 | 2 | 316 | C:0.762658  | T:0.237342   |
| chr28 | 11029473 | 2 | 298 | T:0.761745  | A:0.238255   |
| chr28 | 11029699 | 2 | 260 | C:0.753846  | T:0.246154   |
| chr28 | 11029723 | 2 | 252 | T:0.988095  | C:0.0119048  |
| chr28 | 11029790 | 2 | 146 | G:0.479452  | C:0.520548   |
| chr28 | 11029936 | 2 | 244 | A:0.532787  | G:0.467213   |
| chr28 | 11030002 | 2 | 254 | A:0.496063  | G:0.503937   |
| chr28 | 11030312 | 2 | 286 | T:0.479021  | C:0.520979   |
| chr28 | 11030318 | 2 | 288 | G:0.965278  | T:0.0347222  |
| chr28 | 11030336 | 2 | 294 | A:0.959184  | G:0.0408163  |
| chr28 | 11030502 | 2 | 304 | C:0.447368  | CT:0.552632  |
| chr28 | 11030527 | 2 | 308 | C:0.954545  | T:0.0454545  |
| chr28 | 11030746 | 2 | 300 | T:0.516667  | C:0.483333   |
| chr28 | 11031145 | 2 | 300 | G:0.473333  | A:0.526667   |
| chr28 | 11031243 | 2 | 296 | A:0.496622  | G:0.503378   |
| chr28 | 11031297 | 2 | 302 | A:0.440397  | G:0.559603   |
| chr28 | 11031331 | 2 | 306 | C:0.454248  | T:0.545752   |
| chr28 | 11031449 | 2 | 304 | G:0.697368  | A:0.302632   |
| chr28 | 11031494 | 2 | 300 | C:0.493333  | G:0.506667   |
| chr28 | 11031525 | 2 | 308 | G:0.457792  | A:0.542208   |
| chr28 | 11031693 | 2 | 302 | G:0.993377  | A:0.00662252 |
| chr28 | 11031743 | 2 | 298 | A:0.536913  | C:0.463087   |
| chr28 | 11031794 | 2 | 306 | T:0.990196  | C:0.00980392 |
| chr28 | 11031909 | 2 | 294 | T:0.530612  | A:0.469388   |
| chr28 | 11031910 | 2 | 294 | C:0.530612  | T:0.469388   |

|       |                                              |     |                               |               |
|-------|----------------------------------------------|-----|-------------------------------|---------------|
| chr28 | 11031948 2                                   | 304 | T:0.503289                    | C:0.496711    |
| chr28 | 11031967 2                                   | 300 | C:0.47 T:0.53                 |               |
| chr28 | 11032012 2                                   | 310 | C:0.970968                    | T:0.0290323   |
| chr28 | 11032121 2                                   | 306 | GTATAAGA:0.535948             | G:            |
|       | 0.464052                                     |     |                               |               |
| chr28 | 11032172 2                                   | 296 | T:0.456081                    | C:0.543919    |
| chr28 | 11032245 2                                   | 296 | T:0.52027                     | G:0.47973     |
| chr28 | 11032317 2                                   | 192 | T:0.307292                    | A:0.692708    |
| chr28 | 11032686 2                                   | 290 | C:0.503448                    | CTTT:0.496552 |
| chr28 | 11032702 4                                   | 320 | TTTTA:0.315625                | T:0.175       |
|       | TTTTATTTA:0.315625                           |     | TTTTATTTATTTATTTATTTA:0.19375 |               |
| chr28 | 11032740 2                                   | 286 | C:0.503497                    | CAG:0.496503  |
| chr28 | 11032795 2                                   | 284 | G:0.510563                    | A:0.489437    |
| chr28 | 11032824 2                                   | 288 | C:0.506944                    | T:0.493056    |
| chr28 | 11032875 2                                   | 284 | T:0.482394                    | C:0.517606    |
| chr28 | 11032919 2                                   | 320 |                               |               |
|       | TCTTTATCTAGTATGATCTCTAGACACTTCTTTGC:0.978125 |     | T:0.021875                    |               |
| chr28 | 11032957 2                                   | 320 | T:0.978125                    | C:0.021875    |
| chr28 | 11033126 2                                   | 304 | C:0.483553                    | T:0.516447    |
| chr28 | 11033139 2                                   | 304 | G:0.483553                    | A:0.516447    |
| chr28 | 11033239 2                                   | 312 | A:0.990385                    | C:0.00961538  |
| chr28 | 11033276 2                                   | 306 | T:0.506536                    | C:0.493464    |
| chr28 | 11033358 2                                   | 306 | G:0.970588                    | A:0.0294118   |
| chr28 | 11033557 2                                   | 302 | C:0.748344                    | T:0.251656    |
| chr28 | 11033749 2                                   | 312 | T:0.477564                    | G:0.522436    |
| chr28 | 11033753 2                                   | 312 | T:0.477564                    | C:0.522436    |
| chr28 | 11034008 2                                   | 306 | C:0.506536                    | T:0.493464    |
| chr28 | 11034015 2                                   | 308 | G:0.146104                    | A:0.853896    |
| chr28 | 11034065 2                                   | 308 | C:0.99026                     | T:0.00974026  |
| chr28 | 11034156 2                                   | 306 | C:0.764706                    | T:0.235294    |
| chr28 | 11034325 2                                   | 302 | G:0.463576                    | A:0.536424    |
| chr28 | 11034469 2                                   | 250 | C:0.696 CTTT:0.304            |               |
| chr28 | 11034523 2                                   | 288 | CTT:0.496528                  | C:0.503472    |
| chr28 | 11034636 2                                   | 290 | C:0.503448                    | T:0.496552    |
| chr28 | 11034645 2                                   | 308 | G:0.954545                    | GT:0.0454545  |
| chr28 | 11034647 2                                   | 308 | GCCCAACC:0.954545             | G:            |
|       | 0.0454545                                    |     |                               |               |
| chr28 | 11034970 2                                   | 300 | G:0.763333                    | A:0.236667    |
| chr28 | 11035099 2                                   | 314 | G:0.522293                    | A:0.477707    |
| chr28 | 11035355 2                                   | 306 | G:0.973856                    | A:0.0261438   |
| chr28 | 11035439 2                                   | 308 | C:0.977273                    | T:0.0227273   |
| chr28 | 11035764 2                                   | 298 | G:0.493289                    | A:0.506711    |
| chr28 | 11035877 2                                   | 306 | C:0.509804                    | T:0.490196    |
| chr28 | 11036037 2                                   | 302 | C:0.983444                    | T:0.0165563   |
| chr28 | 11036374 2                                   | 300 | C:0.253333                    | T:0.746667    |
| chr28 | 11036470 2                                   | 308 | G:0.866883                    | A:0.133117    |
| chr28 | 11036491 2                                   | 304 | C:0.884868                    | T:0.115132    |
| chr28 | 11036637 2                                   | 310 | C:0.487097                    | A:0.512903    |
| chr28 | 11036639 2                                   | 310 | T:0.903226                    | G:0.0967742   |
| chr28 | 11036705 2                                   | 308 | G:0.762987                    | A:0.237013    |
| chr28 | 11036874 2                                   | 290 | C:0.0827586                   | G:0.917241    |
| chr28 | 11037064 2                                   | 310 | G:0.512903                    | A:0.487097    |
| chr28 | 11037211 2                                   | 308 | T:0.902597                    | C:0.0974026   |
| chr28 | 11037431 2                                   | 308 | G:0.75 A:0.25                 |               |

|                                                    |            |     |                  |              |
|----------------------------------------------------|------------|-----|------------------|--------------|
| chr28                                              | 11037491 2 | 302 | CTTTTCT:0.847682 | C:0.152318   |
| chr28                                              | 11037506 2 | 304 | T:0.911184       | C:0.0888158  |
| chr28                                              | 11037508 2 | 304 | C:0.911184       | T:0.0888158  |
| chr28                                              | 11037518 2 | 304 | C:0.911184       | T:0.0888158  |
| chr28                                              | 11037522 4 | 320 | C:0.659375       | T:0.084375   |
| CTTTCCTTCTTTCTTTCTTTTTTCTTTCTTTCT:0.23125          |            |     |                  |              |
| CTTTCCTTCTTTCTTTCTTTCTTTCTTTTCTTTCTTTCTTTCTT:0.025 |            |     |                  |              |
| chr28                                              | 11037524 2 | 304 | T:0.911184       | C:0.0888158  |
| chr28                                              | 11037538 2 | 320 | A:0.74375        | T:0.25625    |
| chr28                                              | 11037815 2 | 302 | G:0.5 C:0.5      |              |
| chr28                                              | 11037838 2 | 310 | C:0.932258       | T:0.0677419  |
| chr28                                              | 11037916 2 | 298 | A:0.768456       | T:0.231544   |
| chr28                                              | 11037997 2 | 286 | G:0.765734       | A:0.234266   |
| chr28                                              | 11038002 2 | 286 | T:0.503497       | A:0.496503   |
| chr28                                              | 11038011 2 | 284 | T:0.028169       | C:0.971831   |
| chr28                                              | 11038194 2 | 180 | G:0.905556       | A:0.0944444  |
| chr28                                              | 11038344 2 | 318 | ATTCT:0.861635   | A:0.138365   |
| chr28                                              | 11038412 2 | 314 | C:0.996815       | T:0.00318471 |
| chr28                                              | 11038442 2 | 310 | G:0.983871       | A:0.016129   |
| chr28                                              | 11038526 2 | 298 | A:0.771812       | G:0.228188   |
| chr28                                              | 11038578 2 | 310 | G:0.758065       | A:0.241935   |
| chr28                                              | 11038649 2 | 310 | A:0.748387       | G:0.251613   |
| chr28                                              | 11038656 2 | 310 | A:0.748387       | C:0.251613   |
| chr28                                              | 11038726 2 | 314 | G:0.757962       | A:0.242038   |
| chr28                                              | 11038746 2 | 314 | CT:0.757962      | C:0.242038   |
| chr28                                              | 11038767 2 | 302 | T:0.496689       | C:0.503311   |
| chr28                                              | 11038955 2 | 300 | C:0.746667       | T:0.253333   |
| chr28                                              | 11039000 2 | 300 | A:0.743333       | T:0.256667   |
| chr28                                              | 11039001 2 | 300 | G:0.906667       | C:0.0933333  |
| chr28                                              | 11039040 2 | 300 | A:0.753333       | G:0.246667   |
| chr28                                              | 11039042 2 | 300 | A:0.753333       | G:0.246667   |
| chr28                                              | 11039119 2 | 300 | T:0.84 G:0.16    |              |
| chr28                                              | 11039147 2 | 296 | G:0.871622       | A:0.128378   |
| chr28                                              | 11039175 2 | 294 | G:0.816327       | A:0.183673   |
| chr28                                              | 11039213 2 | 302 | G:0.817881       | A:0.182119   |
| chr28                                              | 11039336 2 | 300 | C:0.753333       | T:0.246667   |
| chr28                                              | 11039421 2 | 302 | G:0.758278       | A:0.241722   |
| chr28                                              | 11039444 2 | 302 | A:0.758278       | G:0.241722   |
| chr28                                              | 11039502 2 | 314 | G:0.761146       | GAAGTCCCCT:  |
| 0.238854                                           |            |     |                  |              |
| chr28                                              | 11039705 2 | 306 | C:0.771242       | T:0.228758   |
| chr28                                              | 11039750 2 | 304 | G:0.815789       | T:0.184211   |
| chr28                                              | 11039822 2 | 300 | G:0.766667       | A:0.233333   |
| chr28                                              | 11039827 2 | 300 | G:0.326667       | C:0.673333   |
| chr28                                              | 11039882 2 | 314 | C:0.996815       | T:0.00318471 |
| chr28                                              | 11039902 2 | 310 | G:0.770968       | A:0.229032   |
| chr28                                              | 11039922 2 | 294 | G:0.860544       | A:0.139456   |
| chr28                                              | 11039935 2 | 298 | G:0.986577       | A:0.0134228  |
| chr28                                              | 11039942 2 | 310 | G:0.770968       | A:0.229032   |
| chr28                                              | 11040024 2 | 298 | G:0.828859       | A:0.171141   |
| chr28                                              | 11040055 2 | 298 | A:0.100671       | C:0.899329   |
| chr28                                              | 11040084 2 | 294 | C:0.738095       | A:0.261905   |
| chr28                                              | 11040134 2 | 304 | T:0.0986842      | C:0.901316   |
| chr28                                              | 11040220 2 | 296 | A:0.756757       | G:0.243243   |



|       |          |   |     |             |              |
|-------|----------|---|-----|-------------|--------------|
| chr28 | 11040227 | 2 | 296 | G:0.756757  | A:0.243243   |
| chr28 | 11040244 | 2 | 292 | A:0.753425  | T:0.246575   |
| chr28 | 11040316 | 2 | 286 | A:0.730769  | G:0.269231   |
| chr28 | 11040349 | 2 | 296 | C:0.739865  | T:0.260135   |
| chr28 | 11040436 | 2 | 300 | T:0.506667  | C:0.493333   |
| chr28 | 11040688 | 2 | 278 | G:0.823741  | C:0.176259   |
| chr28 | 11040769 | 2 | 202 | T:0.683168  | C:0.316832   |
| chr28 | 11040994 | 2 | 274 | T:0.485401  | C:0.514599   |
| chr28 | 11041095 | 2 | 296 | A:0.986486  | C:0.0135135  |
| chr28 | 11041311 | 2 | 298 | G:0.812081  | A:0.187919   |
| chr28 | 11041433 | 2 | 292 | C:0.113014  | T:0.886986   |
| chr28 | 11041590 | 2 | 310 | G:0.990323  | A:0.00967742 |
| chr28 | 11041594 | 2 | 312 | C:0.971154  | T:0.0288462  |
| chr28 | 11041634 | 2 | 308 | A:0.74026   | G:0.25974    |
| chr28 | 11041754 | 2 | 298 | C:0.986577  | T:0.0134228  |
| chr28 | 11041778 | 2 | 300 | T:0.706667  | C:0.293333   |
| chr28 | 11041959 | 2 | 284 | T:0.482394  | C:0.517606   |
| chr28 | 11042130 | 2 | 274 | C:0.594891  | A:0.405109   |
| chr28 | 11042173 | 2 | 284 | G:0.482394  | A:0.517606   |
| chr28 | 11042503 | 2 | 298 | C:0.902685  | T:0.0973154  |
| chr28 | 11042585 | 2 | 302 | T:0.857616  | A:0.142384   |
| chr28 | 11042646 | 2 | 290 | T:0.617241  | A:0.382759   |
| chr28 | 11042665 | 2 | 290 | A:0.834483  | G:0.165517   |
| chr28 | 11042676 | 2 | 290 | A:0.582759  | G:0.417241   |
| chr28 | 11042708 | 2 | 294 | T:0.085034  | C:0.914966   |
| chr28 | 11042715 | 2 | 300 | T:0.786667  | C:0.213333   |
| chr28 | 11042733 | 2 | 294 | C:0.806122  | T:0.193878   |
| chr28 | 11042792 | 2 | 294 | A:0.79932   | G:0.20068    |
| chr28 | 11042800 | 2 | 296 | C:0.0777027 | CA:0.922297  |
| chr28 | 11042878 | 2 | 310 | C:0.812903  | T:0.187097   |
| chr28 | 11042885 | 2 | 310 | A:0.812903  | G:0.187097   |
| chr28 | 11042902 | 2 | 310 | A:0.812903  | T:0.187097   |
| chr28 | 11042903 | 2 | 310 | T:0.812903  | C:0.187097   |
| chr28 | 11042925 | 2 | 286 | G:0.821678  | GT:0.178322  |
| chr28 | 11043013 | 2 | 298 | C:0.744966  | T:0.255034   |
| chr28 | 11043039 | 2 | 308 | G:0.86039   | C:0.13961    |
| chr28 | 11043040 | 2 | 308 | G:0.86039   | T:0.13961    |
| chr28 | 11043061 | 2 | 308 | A:0.811688  | G:0.188312   |
| chr28 | 11043217 | 2 | 306 | C:0.803922  | T:0.196078   |
| chr28 | 11043288 | 2 | 298 | T:0.469799  | G:0.530201   |
| chr28 | 11043364 | 2 | 310 | C:0.587097  | T:0.412903   |
| chr28 | 11043430 | 2 | 310 | A:0.76129   | G:0.23871    |
| chr28 | 11043466 | 2 | 304 | C:0.569079  | T:0.430921   |
| chr28 | 11043573 | 2 | 298 | G:0.587248  | A:0.412752   |
| chr28 | 11043743 | 2 | 308 | T:0.551948  | C:0.448052   |
| chr28 | 11043747 | 2 | 308 | G:0.551948  | A:0.448052   |
| chr28 | 11043767 | 2 | 308 | C:0.977273  | A:0.0227273  |
| chr28 | 11043779 | 2 | 298 | A:0.563758  | G:0.436242   |
| chr28 | 11043785 | 2 | 300 | G:0.77      | A:0.23       |
| chr28 | 11043879 | 2 | 306 | C:0.584967  | A:0.415033   |
| chr28 | 11043889 | 2 | 306 | C:0.584967  | G:0.415033   |
| chr28 | 11043968 | 2 | 302 | C:0.738411  | A:0.261589   |
| chr28 | 11044034 | 2 | 294 | C:0.537415  | T:0.462585   |
| chr28 | 11044071 | 2 | 304 | A:0.809211  | G:0.190789   |

|       |                                    |           |                |                |
|-------|------------------------------------|-----------|----------------|----------------|
| chr28 | 11044072 2                         | 304       | T:0.809211     | C:0.190789     |
| chr28 | 11044133 2                         | 314       | A:0.541401     | ACCCAGGGGTAAG: |
|       | 0.458599                           |           |                |                |
| chr28 | 11044260 2                         | 304       | G:0.476974     | C:0.523026     |
| chr28 | 11044291 2                         | 290       | G:0.975862     | A:0.0241379    |
| chr28 | 11044351 2                         | 300       | A:0.55 T:0.45  |                |
| chr28 | 11044353 2                         | 300       | C:0.99 T:0.01  |                |
| chr28 | 11044494 2                         | 292       | G:0.568493     | A:0.431507     |
| chr28 | 11044534 2                         | 302       | A:0.741722     | G:0.258278     |
| chr28 | 11044630 2                         | 294       | G:0.918367     | C:0.0816327    |
| chr28 | 11044814 2                         | 302       | CCT:0.784768   | C:0.215232     |
| chr28 | 11044910 2                         | 302       | G:0.963576     | A:0.0364238    |
| chr28 | 11044915 2                         | 298       | G:0.751678     | T:0.248322     |
| chr28 | 11044953 2                         | 316       | T:0.911392     |                |
|       | TGAGACTGAATTTTTTTTTTTTTTTTTTTGGAA: | 0.0886076 |                |                |
| chr28 | 11044981 3                         | 298       | G:0.755034     | GGT:0.100671   |
|       | GGTGT:0.144295                     |           |                |                |
| chr28 | 11044996 2                         | 282       | GTA:0.968085   | G:0.0319149    |
| chr28 | 11044998 2                         | 282       | A:0.680851     | G:0.319149     |
| chr28 | 11045201 2                         | 298       | C:0.956376     | T:0.0436242    |
| chr28 | 11045229 2                         | 290       | G:0.889655     | T:0.110345     |
| chr28 | 11045441 2                         | 304       | G:0.898026     | C:0.101974     |
| chr28 | 11045483 2                         | 314       | G:0.958599     | A:0.0414013    |
| chr28 | 11045564 2                         | 306       | T:0.565359     | C:0.434641     |
| chr28 | 11045598 2                         | 316       | G:0.765823     | A:0.234177     |
| chr28 | 11045608 2                         | 316       | A:0.484177     | T:0.515823     |
| chr28 | 11045649 2                         | 320       | A:0.090625     | C:0.909375     |
| chr28 | 11045652 2                         | 320       | C:0.49375      | T:0.50625      |
| chr28 | 11045820 2                         | 296       | C:0.743243     | T:0.256757     |
| chr28 | 11045837 2                         | 302       | G:0.877483     | A:0.122517     |
| chr28 | 11045846 2                         | 300       | C:0.586667     | T:0.413333     |
| chr28 | 11045875 2                         | 298       | T:0.516779     | C:0.483221     |
| chr28 | 11045956 2                         | 300       | G:0.993333     | A:0.00666667   |
| chr28 | 11046093 2                         | 300       | A:0.486667     | T:0.513333     |
| chr28 | 11046283 2                         | 296       | C:0.925676     | G:0.0743243    |
| chr28 | 11046314 3                         | 300       | TTTTA:0.743333 | T:0.106667     |
|       | TTTTATTTA:0.15                     |           |                |                |
| chr28 | 11046366 2                         | 310       | T:0.603226     |                |
|       | TTTTATTTATTTATTTATTTATTTA:0.396774 |           |                |                |
| chr28 | 11046734 2                         | 306       | C:0.630719     | T:0.369281     |
| chr28 | 11046745 2                         | 306       | C:0.630719     | T:0.369281     |
| chr28 | 11046806 2                         | 304       | A:0.832237     | G:0.167763     |
| chr28 | 11046821 2                         | 296       | G:0.925676     | A:0.0743243    |
| chr28 | 11047302 2                         | 290       | C:0.489655     | T:0.510345     |
| chr28 | 11047309 2                         | 294       | C:0.996599     | T:0.00340136   |
| chr28 | 11047492 2                         | 292       | G:0.503425     | A:0.496575     |
| chr28 | 11047710 2                         | 298       | C:0.966443     | T:0.033557     |
| chr28 | 11047757 2                         | 300       | A:0.07 G:0.93  |                |
| chr28 | 11047883 2                         | 296       | G:0.0844595    | T:0.915541     |
| chr28 | 11047960 2                         | 298       | A:0.983221     | T:0.0167785    |
| chr28 | 11047997 2                         | 292       | T:0.60274      | G:0.39726      |
| chr28 | 11048566 2                         | 298       | A:0.936242     | C:0.0637584    |
| chr28 | 11048570 2                         | 302       | A:0.506623     | G:0.493377     |
| chr28 | 11048798 2                         | 294       | A:0.0578231    | G:0.942177     |

|                           |          |   |     |                         |               |
|---------------------------|----------|---|-----|-------------------------|---------------|
| chr28                     | 11048852 | 2 | 300 | C:0.976667              | T:0.0233333   |
| chr28                     | 11048868 | 2 | 296 | C:0.0945946             | A:0.905405    |
| chr28                     | 11048974 | 2 | 296 | C:0.496622              | A:0.503378    |
| chr28                     | 11049105 | 2 | 282 | C:0.971631              | T:0.0283688   |
| chr28                     | 11049165 | 2 | 278 | GA:0.122302             | G:0.877698    |
| chr28                     | 11049177 | 2 | 278 | A:0.122302              | G:0.877698    |
| chr28                     | 11049178 | 2 | 278 | A:0.122302              | T:0.877698    |
| chr28                     | 11049225 | 2 | 270 | C:0.977778              | T:0.0222222   |
| chr28                     | 11049282 | 2 | 286 | A:0.940559              | AG:0.0594406  |
| chr28                     | 11049309 | 3 | 310 | TAAAAACAAAAAC:0.445161  | T:            |
| 0.170968 TAAAAAC:0.383871 |          |   |     |                         |               |
| chr28                     | 11049314 | 2 | 310 | A:0.687097              | G:0.312903    |
| chr28                     | 11049392 | 2 | 296 | C:0.631757              | CCTT:0.368243 |
| chr28                     | 11049477 | 2 | 298 | C:0.620805              | G:0.379195    |
| chr28                     | 11049681 | 2 | 294 | T:0.972789              | C:0.0272109   |
| chr28                     | 11049791 | 2 | 294 | T:0.982993              | C:0.0170068   |
| chr28                     | 11049831 | 2 | 306 | T:0.617647              | C:0.382353    |
| chr28                     | 11049855 | 2 | 306 | T:0.617647              | C:0.382353    |
| chr28                     | 11050086 | 2 | 314 | A:0.617834              | C:0.382166    |
| chr28                     | 11050104 | 2 | 314 | C:0.617834              | T:0.382166    |
| chr28                     | 11050151 | 2 | 312 | T:0.608974              | C:0.391026    |
| chr28                     | 11050468 | 2 | 292 | A:0.962329              | G:0.0376712   |
| chr28                     | 11050712 | 2 | 298 | G:0.963087              | A:0.0369128   |
| chr28                     | 11050994 | 2 | 298 | T:0.147651              | A:0.852349    |
| chr28                     | 11051063 | 2 | 306 | C:0.820261              | T:0.179739    |
| chr28                     | 11051264 | 2 | 292 | C:0.636986              | T:0.363014    |
| chr28                     | 11051347 | 2 | 284 | AT:0.989437             | A:0.0105634   |
| chr28                     | 11051551 | 2 | 294 | AC:0.986395             | A:0.0136054   |
| chr28                     | 11051910 | 2 | 246 | C:0.630081              | CT:0.369919   |
| chr28                     | 11051955 | 2 | 286 | C:0.972028              | T:0.027972    |
| chr28                     | 11052728 | 2 | 294 | C:0.986395              | T:0.0136054   |
| chr28                     | 11052738 | 2 | 294 | C:0.986395              | T:0.0136054   |
| chr28                     | 11052817 | 2 | 298 | T:0.989933              | C:0.0100671   |
| chr28                     | 11052838 | 2 | 310 | TTTTCTTTC:0.970968      | T:            |
| 0.0290323                 |          |   |     |                         |               |
| chr28                     | 11052898 | 2 | 310 | CTTTCTTTCTTTCT:0.983871 | C:            |
| 0.016129                  |          |   |     |                         |               |
| chr28                     | 11052902 | 2 | 316 | CTTTCTTTCT:0.962025     | C:            |
| 0.0379747                 |          |   |     |                         |               |
| chr28                     | 11052911 | 2 | 320 | T:0.971875              | TTTC:0.028125 |
| chr28                     | 11053169 | 2 | 296 | C:0.989865              | T:0.0101351   |
| chr28                     | 11053300 | 2 | 292 | G:0.993151              | A:0.00684932  |
| chr28                     | 11054904 | 2 | 310 | T:0.858065              | C:0.141935    |
| chr28                     | 11055340 | 3 | 298 | CT:0.419463             | C:0.375839    |
| CTT:0.204698              |          |   |     |                         |               |
| chr28                     | 11057389 | 2 | 300 | A:0.883333              | G:0.116667    |
| chr28                     | 11057902 | 2 | 300 | T:0.973333              | C:0.0266667   |
| chr28                     | 11058160 | 2 | 302 | C:0.963576              | T:0.0364238   |
| chr28                     | 11058630 | 4 | 300 | ATTT:0.103333           | A:0.353333    |
| AT:0.446667 ATT:0.0966667 |          |   |     |                         |               |
| chr28                     | 11058660 | 2 | 288 | T:0.986111              | C:0.0138889   |
| chr28                     | 11059767 | 2 | 286 | T:0.5 TG:0.5            |               |
| chr28                     | 11060285 | 2 | 300 | C:0.96 T:0.04           |               |
| chr28                     | 11060514 | 2 | 304 | C:0.0789474             | T:0.921053    |

|       |          |   |     |                |                |
|-------|----------|---|-----|----------------|----------------|
| chr28 | 11060525 | 2 | 302 | C:0.950331     | CA:0.0496689   |
| chr28 | 11061225 | 2 | 296 | G:0.966216     | A:0.0337838    |
| chr28 | 11062055 | 2 | 304 | T:0.654605     | A:0.345395     |
| chr28 | 11062158 | 2 | 302 | G:0.84106      | A:0.15894      |
| chr28 | 11062245 | 2 | 302 | T:0.503311     | C:0.496689     |
| chr28 | 11062255 | 2 | 302 | A:0.142384     | C:0.857616     |
| chr28 | 11062310 | 2 | 298 | G:0.832215     | A:0.167785     |
| chr28 | 11062417 | 2 | 296 | T:0.824324     | TA:0.175676    |
| chr28 | 11062567 | 2 | 312 | T:0.823718     | C:0.176282     |
| chr28 | 11062762 | 2 | 310 | C:0.835484     | T:0.164516     |
| chr28 | 11062783 | 2 | 310 | C:0.835484     | G:0.164516     |
| chr28 | 11062834 | 2 | 310 | A:0.174194     | T:0.825806     |
| chr28 | 11062874 | 2 | 304 | G:0.957237     | C:0.0427632    |
| chr28 | 11063078 | 2 | 308 | A:0.214286     | T:0.785714     |
| chr28 | 11063083 | 2 | 306 | T:0.846405     | G:0.153595     |
| chr28 | 11063122 | 2 | 302 | T:0.824503     | C:0.175497     |
| chr28 | 11063134 | 2 | 302 | T:0.824503     | C:0.175497     |
| chr28 | 11063207 | 2 | 290 | C:0.906897     | T:0.0931034    |
| chr28 | 11063288 | 2 | 298 | T:0.842282     | A:0.157718     |
| chr28 | 11063324 | 2 | 314 | G:0.850318     | A:0.149682     |
| chr28 | 11063335 | 2 | 314 | C:0.901274     | T:0.0987261    |
| chr28 | 11063349 | 2 | 314 | A:0.850318     | G:0.149682     |
| chr28 | 11063403 | 2 | 308 | A:0.863636     | G:0.136364     |
| chr28 | 11063568 | 2 | 302 | G:0.97351      | A:0.0264901    |
| chr28 | 11063647 | 2 | 306 | A:0.147059     | G:0.852941     |
| chr28 | 11063753 | 2 | 304 | C:0.154605     | A:0.845395     |
| chr28 | 11063772 | 2 | 310 | TGTTA:0.151613 | T:0.848387     |
| chr28 | 11063953 | 2 | 306 | G:0.169935     | GTGTC:0.830065 |
| chr28 | 11064493 | 2 | 278 | T:0.158273     | C:0.841727     |
| chr28 | 11064863 | 3 | 280 | TAA:0.303571   | T:0.475 TA:    |
|       | 0.221429 |   |     |                |                |
| chr28 | 11064942 | 2 | 288 | T:0.965278     | A:0.0347222    |
| chr28 | 11065209 | 2 | 244 | A:0.729508     | G:0.270492     |
| chr28 | 11066114 | 2 | 278 | CT:0.0935252   | C:0.906475     |
| chr28 | 11066583 | 2 | 308 | A:0.892857     | G:0.107143     |
| chr28 | 11066856 | 2 | 306 | A:0 T:1        |                |
| chr28 | 11066857 | 2 | 306 | A:0 G:1        |                |
| chr28 | 11066898 | 2 | 300 | A:0 G:1        |                |
| chr28 | 11066926 | 2 | 302 | A:0.748344     | AC:0.251656    |
| chr28 | 11067087 | 2 | 304 | A:0.983553     | G:0.0164474    |
| chr28 | 11067397 | 2 | 300 | C:0.77 T:0.23  |                |
| chr28 | 11067465 | 2 | 304 | T:0.210526     | C:0.789474     |
| chr28 | 11067559 | 2 | 302 | G:0.930464     | T:0.0695364    |
| chr28 | 11067786 | 2 | 298 | T:0.748322     | C:0.251678     |
| chr28 | 11068293 | 2 | 300 | A:0.77 G:0.23  |                |
| chr28 | 11068294 | 2 | 304 | G:0.111842     | GGA:0.888158   |
| chr28 | 11068433 | 2 | 304 | T:0 G:1        |                |
| chr28 | 11068476 | 2 | 286 | CTG:0.870629   | C:0.129371     |
| chr28 | 11068486 | 2 | 288 | T:0 C:1        |                |
| chr28 | 11068487 | 2 | 288 | T:0 C:1        |                |
| chr28 | 11068648 | 2 | 274 | AT:0.729927    | A:0.270073     |
| chr28 | 11068658 | 2 | 274 | T:0.99635      | A:0.00364964   |
| chr28 | 11069264 | 2 | 300 | G:0.953333     | C:0.0466667    |
| chr28 | 11069542 | 2 | 298 | G:0.986577     | C:0.0134228    |

|       |                      |     |                              |                 |
|-------|----------------------|-----|------------------------------|-----------------|
| chr28 | 11069630 2           | 318 | GCTGGCAAGTGCCTGGGGC:0.858491 |                 |
|       | G:0.141509           |     |                              |                 |
| chr28 | 11069722 2           | 308 | G:0.853896                   | A:0.146104      |
| chr28 | 11070083 2           | 312 | AT:0.788462                  | A:0.211538      |
| chr28 | 11070732 2           | 296 | C:0.972973                   | T:0.027027      |
| chr28 | 11070951 2           | 288 | GT:0.423611                  | G:0.576389      |
| chr28 | 11071678 2           | 290 | T:0.124138                   | C:0.875862      |
| chr28 | 11071878 2           | 304 | C:0.855263                   | T:0.144737      |
| chr28 | 11071976 2           | 296 | C:0.888514                   | T:0.111486      |
| chr28 | 11072114 2           | 302 | A:0.635762                   | T:0.364238      |
| chr28 | 11072137 2           | 296 | A:0.608108                   | G:0.391892      |
| chr28 | 11072430 2           | 294 | T:0.510204                   | C:0.489796      |
| chr28 | 11072492 3           | 250 | CTT:0.304                    | C:0.476 CT:0.22 |
| chr28 | 11072543 2           | 300 | GAC:0.84 G:0.16              |                 |
| chr28 | 11072547 3           | 312 | CACAG:0.679487               | C:0.163462      |
|       | CAGAGAGACAG:0.157051 |     |                              |                 |
| chr28 | 11072549 3           | 308 | CAGAGAG:0.512987             | C:0.103896      |
|       | GAGAGAG:0.383117     |     |                              |                 |
| chr28 | 11072840 2           | 262 | G:0.110687                   | T:0.889313      |
| chr28 | 11073413 2           | 298 | T:0.52349                    | A:0.47651       |
| chr28 | 11073415 2           | 298 | G:0.52349                    | A:0.47651       |
| chr28 | 11073659 2           | 292 | C:0.989726                   | T:0.010274      |
| chr28 | 11073995 2           | 264 | GCTT:0.693182                | G:0.306818      |
| chr28 | 11073998 2           | 284 | T:0.964789                   | G:0.0352113     |
| chr28 | 11073999 2           | 284 | CTT:0.964789                 | C:0.0352113     |
| chr28 | 11074002 2           | 292 | T:0.952055                   | C:0.0479452     |
| chr28 | 11074091 2           | 294 | A:0.965986                   | G:0.0340136     |
| chr28 | 11074125 2           | 298 | A:0.879195                   | G:0.120805      |
| chr28 | 11074183 2           | 294 | C:0.969388                   | T:0.0306122     |
| chr28 | 11074258 2           | 304 | C:0.835526                   | T:0.164474      |
| chr28 | 11074371 2           | 308 | C:0.961039                   | CG:0.038961     |
| chr28 | 11074479 2           | 294 | A:0.989796                   | G:0.0102041     |
| chr28 | 11074654 2           | 316 | G:0.962025                   | A:0.0379747     |
| chr28 | 11074671 2           | 318 | GGC:0.550314                 | G:0.449686      |
| chr28 | 11074800 2           | 294 | G:0.901361                   | A:0.0986395     |
| chr28 | 11074844 2           | 298 | GGT:0.728188                 | G:0.271812      |
| chr28 | 11074860 2           | 298 | G:0.718121                   | A:0.281879      |
| chr28 | 11074980 2           | 300 | G:0.97 C:0.03                |                 |
| chr28 | 11075230 2           | 280 | A:0.957143                   | G:0.0428571     |
| chr28 | 11075318 2           | 288 | A:0.965278                   | G:0.0347222     |
| chr28 | 11075428 2           | 290 | C:0.962069                   | T:0.037931      |
| chr28 | 11075439 2           | 290 | C:0.962069                   | G:0.037931      |
| chr28 | 11075530 2           | 298 | C:0.956376                   | T:0.0436242     |
| chr28 | 11075544 2           | 298 | ATAAGT:0.956376              | A:0.0436242     |
| chr28 | 11075654 2           | 294 | A:0.714286                   | AT:0.285714     |
| chr28 | 11075655 2           | 294 | A:0.714286                   | T:0.285714      |
| chr28 | 11075670 2           | 296 | C:0.131757                   | T:0.868243      |
| chr28 | 11075741 3           | 294 | TTTATTTA:0.64966             | TTTTA:0.268707  |
|       | T:0.0816327          |     |                              |                 |
| chr28 | 11075748 3           | 308 | ATTTTT:0.282468              | A:0.256494      |
|       | ATTTTTT:0.461039     |     |                              |                 |
| chr28 | 11075791 2           | 276 | A:0.807971                   | C:0.192029      |
| chr28 | 11075888 2           | 282 | G:0.897163                   | C:0.102837      |
| chr28 | 11075926 2           | 294 | A:0.153061                   | G:0.846939      |

|                                      |            |     |                                 |                   |
|--------------------------------------|------------|-----|---------------------------------|-------------------|
| chr28                                | 11075938 2 | 296 | T:0.733108                      | G:0.266892        |
| chr28                                | 11075981 2 | 286 | T:0.968531                      | TC:0.0314685      |
| chr28                                | 11076189 2 | 292 | AT:0.945205                     | A:0.0547945       |
| chr28                                | 11076227 2 | 300 | G:0.963333                      | T:0.0366667       |
| chr28                                | 11076236 2 | 300 | T:0.963333                      | TG:0.0366667      |
| chr28                                | 11076317 2 | 292 | G:0.962329                      | C:0.0376712       |
| chr28                                | 11076385 2 | 300 | G:0.98 A:0.02                   |                   |
| chr28                                | 11076630 2 | 290 | T:0.955172                      | C:0.0448276       |
| chr28                                | 11076714 2 | 302 | G:0.966887                      | A:0.0331126       |
| chr28                                | 11076770 2 | 310 | G:0.964516                      | A:0.0354839       |
| chr28                                | 11076911 2 | 300 | G:0.96 A:0.04                   |                   |
| chr28                                | 11076921 2 | 296 | T:0.817568                      | A:0.182432        |
| chr28                                | 11076937 2 | 294 | C:0.965986                      | T:0.0340136       |
| chr28                                | 11076994 2 | 312 | GCACTGC:0.942308                | G:0.0576923       |
| chr28                                | 11077054 2 | 296 | C:0.986486                      | A:0.0135135       |
| chr28                                | 11077133 2 | 296 | C:0.851351                      | T:0.148649        |
| chr28                                | 11077297 2 | 300 | C:0.696667                      | T:0.303333        |
| chr28                                | 11077318 2 | 300 | A:0.1 G:0.9                     |                   |
| chr28                                | 11077319 2 | 302 | T:0.966887                      | C:0.0331126       |
| chr28                                | 11077447 2 | 314 | T:0.977707                      |                   |
| TCCAGGCACAGAGCTACCAA:0.022293        |            |     |                                 |                   |
| chr28                                | 11077561 2 | 296 | C:0.966216                      | T:0.0337838       |
| chr28                                | 11077680 2 | 302 | CTT:0.963576                    | C:0.0364238       |
| chr28                                | 11077780 2 | 302 | G:0.966887                      | A:0.0331126       |
| chr28                                | 11077863 2 | 302 | C:0.596026                      | A:0.403974        |
| chr28                                | 11077910 2 | 304 | G:0.993421                      | C:0.00657895      |
| chr28                                | 11078064 2 | 306 | GA:0.928105                     | G:0.0718954       |
| chr28                                | 11078201 2 | 292 | T:0.623288                      | C:0.376712        |
| chr28                                | 11078236 2 | 302 | A:0.917219                      | G:0.0827815       |
| chr28                                | 11078310 2 | 292 | A:0.565068                      | G:0.434932        |
| chr28                                | 11078317 2 | 292 | A:0.921233                      | C:0.0787671       |
| chr28                                | 11078404 2 | 290 | C:0.237931                      | CG:0.762069       |
| chr28                                | 11078422 2 | 302 | C:0.890728                      | CGGGCTGCTGTG:     |
| 0.109272                             |            |     |                                 |                   |
| chr28                                | 11078501 2 | 274 | A:0.919708                      | C:0.080292        |
| chr28                                | 11078804 2 | 310 | T:0.406452                      | C:0.593548        |
| chr28                                | 11078812 2 | 314 | CGGAGGGAGGGTGACTGGCCCG:0.869427 |                   |
| C:0.130573                           |            |     |                                 |                   |
| chr28                                | 11078843 2 | 312 | A:0.189103                      | G:0.810897        |
| chr28                                | 11078939 2 | 288 | C:0.725694                      | T:0.274306        |
| chr28                                | 11078991 2 | 294 | A:0.721088                      | G:0.278912        |
| chr28                                | 11079200 2 | 304 | A:0.697368                      | G:0.302632        |
| chr28                                | 11079493 2 | 316 | A:0.693038                      |                   |
| AATGAGTGCGTGTGCATTCAAGTGTAT:0.306962 |            |     |                                 |                   |
| chr28                                | 11079599 2 | 306 | C:0.732026                      | T:0.267974        |
| chr28                                | 11079620 2 | 302 | G:0.907285                      | A:0.0927152       |
| chr28                                | 11079735 2 | 308 | C:0.678571                      | T:0.321429        |
| chr28                                | 11079947 2 | 302 | T:0.741722                      | C:0.258278        |
| chr28                                | 11080056 2 | 302 | G:0.956954                      | C:0.0430464       |
| chr28                                | 11080401 2 | 276 | A:0.916667                      | G:0.0833333       |
| chr28                                | 11080539 2 | 304 | ACAG:0.973684                   | A:0.0263158       |
| chr28                                | 11080543 2 | 304 | G:0.973684                      | GTGATGA:0.0263158 |
| chr28                                | 11080749 2 | 286 | C:0.597902                      | T:0.402098        |
| chr28                                | 11080756 2 | 290 | T:0.737931                      | C:0.262069        |

|             |          |   |     |                                |                  |
|-------------|----------|---|-----|--------------------------------|------------------|
| chr28       | 11080853 | 2 | 304 | TG:0.970395                    | T:0.0296053      |
| chr28       | 11080976 | 2 | 308 | T:0.753247                     | G:0.246753       |
| chr28       | 11081239 | 2 | 294 | A:0.765306                     | G:0.234694       |
| chr28       | 11081330 | 2 | 308 | CTG:0.987013                   | C:0.012987       |
| chr28       | 11081483 | 2 | 302 | A:0.735099                     | AC:0.264901      |
| chr28       | 11081494 | 2 | 304 | T:0.674342                     | G:0.325658       |
| chr28       | 11081540 | 2 | 302 | C:0.725166                     | T:0.274834       |
| chr28       | 11081649 | 2 | 300 | C:0.976667                     | T:0.0233333      |
| chr28       | 11081757 | 2 | 290 | C:0.272414                     | G:0.727586       |
| chr28       | 11081919 | 2 | 296 | C:0.733108                     | T:0.266892       |
| chr28       | 11081959 | 2 | 306 | T:0.0816993                    | C:0.918301       |
| chr28       | 11082040 | 2 | 304 | T:0.726974                     | C:0.273026       |
| chr28       | 11082136 | 2 | 308 | A:0.727273                     | C:0.272727       |
| chr28       | 11082244 | 2 | 310 | C:0.183871                     | T:0.816129       |
| chr28       | 11082388 | 2 | 306 | C:0.218954                     | G:0.781046       |
| chr28       | 11082442 | 2 | 306 | C:0.189542                     | T:0.810458       |
| chr28       | 11082920 | 2 | 306 | G:0.738562                     | A:0.261438       |
| chr28       | 11083144 | 2 | 302 | T:0.715232                     | C:0.284768       |
| chr28       | 11083204 | 3 | 314 | C:0.694268                     | G:0.00636943     |
| T:0.299363  |          |   |     |                                |                  |
| chr28       | 11083338 | 2 | 306 | C:0.627451                     | CTG:0.372549     |
| chr28       | 11083603 | 2 | 288 | A:0.701389                     | T:0.298611       |
| chr28       | 11083870 | 2 | 296 | C:0.418919                     | T:0.581081       |
| chr28       | 11083873 | 2 | 292 | C:0.989726                     | T:0.010274       |
| chr28       | 11083874 | 2 | 292 | G:0.989726                     | A:0.010274       |
| chr28       | 11083953 | 2 | 304 | C:0.967105                     | T:0.0328947      |
| chr28       | 11084408 | 2 | 302 | C:0.913907                     | T:0.0860927      |
| chr28       | 11084893 | 2 | 130 | T:0.584615                     | TA:0.415385      |
| chr28       | 11084944 | 2 | 306 | GAGAGAGAGAGAGCACGCGCC:0.650327 |                  |
| G:0.349673  |          |   |     |                                |                  |
| chr28       | 11085077 | 2 | 284 | G:0.380282                     | A:0.619718       |
| chr28       | 11085221 | 2 | 292 | T:0.428082                     | C:0.571918       |
| chr28       | 11085223 | 2 | 290 | C:0.955172                     | A:0.0448276      |
| chr28       | 11085484 | 2 | 310 | G:0.777419                     | A:0.222581       |
| chr28       | 11085598 | 2 | 308 | GT:0.99026                     | G:0.00974026     |
| chr28       | 11085630 | 2 | 304 | A:0.947368                     | G:0.0526316      |
| chr28       | 11085654 | 2 | 318 | A:0.113208                     | AGTGAAGTACTGTGG: |
| 0.886792    |          |   |     |                                |                  |
| chr28       | 11085939 | 2 | 298 | T:0.788591                     | C:0.211409       |
| chr28       | 11086111 | 2 | 304 | G:0.990132                     | A:0.00986842     |
| chr28       | 11086130 | 2 | 294 | C:0.629252                     | CG:0.370748      |
| chr28       | 11086334 | 2 | 298 | C:0.61745                      | A:0.38255        |
| chr28       | 11086385 | 2 | 300 | G:0.706667                     | A:0.293333       |
| chr28       | 11086761 | 2 | 298 | C:0.620805                     | T:0.379195       |
| chr28       | 11086773 | 2 | 290 | T:0.6 C:0.4                    |                  |
| chr28       | 11086780 | 2 | 296 | C:0.85473                      | T:0.14527        |
| chr28       | 11087050 | 2 | 296 | T:0.60473                      | C:0.39527        |
| chr28       | 11087121 | 2 | 302 | G:0.970199                     | A:0.0298013      |
| chr28       | 11087143 | 2 | 312 | T:0.980769                     | C:0.0192308      |
| chr28       | 11087191 | 2 | 298 | C:0.979866                     | CT:0.0201342     |
| chr28       | 11087197 | 3 | 298 | A:0.228188                     | G:0.751678       |
| C:0.0201342 |          |   |     |                                |                  |
| chr28       | 11087228 | 2 | 290 | G:0.758621                     | T:0.241379       |
| chr28       | 11087249 | 2 | 294 | T:0.251701                     | C:0.748299       |

|                             |            |     |                |              |
|-----------------------------|------------|-----|----------------|--------------|
| chr28                       | 11087269 3 | 304 | A:0.246711     | G:0.730263   |
| C:0.0230263                 |            |     |                |              |
| chr28                       | 11087277 2 | 304 | C:0.973684     | T:0.0263158  |
| chr28                       | 11087278 2 | 304 | G:0.792763     | A:0.207237   |
| chr28                       | 11087407 2 | 300 | C:0.99         | T:0.01       |
| chr28                       | 11087609 2 | 300 | C:0.923333     | T:0.0766667  |
| chr28                       | 11087639 2 | 304 | C:0.898026     | T:0.101974   |
| chr28                       | 11087712 2 | 312 | C:0.99359      | A:0.00641026 |
| chr28                       | 11088107 2 | 306 | T:0.960784     | A:0.0392157  |
| chr28                       | 11088113 2 | 304 | A:0.674342     | G:0.325658   |
| chr28                       | 11088146 2 | 300 | C:0.763333     | T:0.236667   |
| chr28                       | 11088216 2 | 304 | T:0.671053     | A:0.328947   |
| chr28                       | 11088303 2 | 308 | T:0.961039     | A:0.038961   |
| chr28                       | 11088311 2 | 308 | T:0.961039     | A:0.038961   |
| chr28                       | 11088406 2 | 298 | G:0.899329     | T:0.100671   |
| chr28                       | 11088443 2 | 286 | C:0.804196     | T:0.195804   |
| chr28                       | 11088646 2 | 302 | G:0.788079     | C:0.211921   |
| chr28                       | 11088889 2 | 294 | C:0.47619      | G:0.52381    |
| chr28                       | 11088961 2 | 278 | G:0.478417     | T:0.521583   |
| chr28                       | 11089447 2 | 290 | T:0.737931     | TG:0.262069  |
| chr28                       | 11089675 2 | 286 | T:0.804196     | C:0.195804   |
| chr28                       | 11089868 2 | 294 | ATGAT:0.816327 | A:0.183673   |
| chr28                       | 11090312 2 | 304 | C:0.509868     | T:0.490132   |
| chr28                       | 11090385 2 | 298 | C:0.57047      | T:0.42953    |
| chr28                       | 11090391 2 | 306 | G:0.794118     | A:0.205882   |
| chr28                       | 11090401 2 | 306 | T:0.794118     | C:0.205882   |
| chr28                       | 11090601 2 | 304 | T:0.549342     | C:0.450658   |
| chr28                       | 11090646 2 | 302 | G:0.678808     | A:0.321192   |
| chr28                       | 11090851 2 | 310 | T:0.8          | C:0.2        |
| chr28                       | 11091691 2 | 304 | T:0.904605     | C:0.0953947  |
| chr28                       | 11091957 2 | 306 | A:0.529412     | T:0.470588   |
| chr28                       | 11091964 2 | 308 | C:0.818182     | T:0.181818   |
| chr28                       | 11091986 2 | 312 | C:0.298077     | T:0.701923   |
| chr28                       | 11092072 2 | 300 | G:0.89         | A:0.11       |
| chr28                       | 11092484 2 | 308 | G:0.50974      | A:0.49026    |
| chr28                       | 11092673 2 | 290 | C:0.806897     | G:0.193103   |
| chr28                       | 11092734 2 | 288 | G:0.541667     | A:0.458333   |
| chr28                       | 11092759 2 | 294 | A:0.306122     | G:0.693878   |
| chr28                       | 11092773 4 | 300 | CT:0.536667    | C:0.113333   |
| CTT:0.256667 CTTT:0.0933333 |            |     |                |              |
| chr28                       | 11092798 2 | 272 | A:0.518382     | G:0.481618   |
| chr28                       | 11093193 2 | 262 | T:0.767176     | C:0.232824   |
| chr28                       | 11093450 2 | 306 | C:0.957516     | T:0.0424837  |
| chr28                       | 11093451 2 | 306 | G:0.954248     | A:0.0457516  |
| chr28                       | 11093600 2 | 298 | T:0.536913     | C:0.463087   |
| chr28                       | 11093730 2 | 308 | C:0.967532     | T:0.0324675  |
| chr28                       | 11093772 2 | 308 | A:0.0909091    | C:0.909091   |
| chr28                       | 11094006 2 | 300 | T:0.216667     | C:0.783333   |
| chr28                       | 11094058 2 | 304 | C:0.296053     | T:0.703947   |
| chr28                       | 11094197 2 | 286 | A:0.293706     | C:0.706294   |
| chr28                       | 11094562 2 | 292 | T:0.321918     | C:0.678082   |
| chr28                       | 11094827 2 | 262 | T:0.221374     | C:0.778626   |
| chr28                       | 11094880 2 | 264 | G:0.768939     | C:0.231061   |
| chr28                       | 11095001 2 | 148 | CTA:0.506757   | C:0.493243   |



|       |            |     |                            |                 |
|-------|------------|-----|----------------------------|-----------------|
| chr28 | 11095046 2 | 282 | GAGGT:0.262411             | G:0.737589      |
| chr28 | 11095051 2 | 282 | CATCACTGTTTCCTCGA:0.262411 |                 |
|       | C:0.737589 |     |                            |                 |
| chr28 | 11095265 2 | 256 | A:0.242188                 | G:0.757812      |
| chr28 | 11095422 2 | 260 | C:0.953846                 | T:0.0461538     |
| chr28 | 11095450 2 | 226 | T:0.247788                 | C:0.752212      |
| chr28 | 11095473 2 | 182 | G:0.510989                 | GC:0.489011     |
| chr28 | 11095587 2 | 262 | GC:0.729008                | G:0.270992      |
| chr28 | 11095611 2 | 268 | T:0.80597                  | C:0.19403       |
| chr28 | 11095636 2 | 280 | T:0.214286                 | TC:0.785714     |
| chr28 | 11095641 2 | 280 | T:0.214286                 | C:0.785714      |
| chr28 | 11095713 2 | 276 | G:0.293478                 | A:0.706522      |
| chr28 | 11095747 2 | 276 | C:0.32971                  | T:0.67029       |
| chr28 | 11096086 2 | 294 | T:0.292517                 | TC:0.707483     |
| chr28 | 11096095 2 | 294 | T:0.292517                 | C:0.707483      |
| chr28 | 11096168 2 | 288 | T:0.0659722                | C:0.934028      |
| chr28 | 11096230 2 | 296 | C:0.912162                 | G:0.0878378     |
| chr28 | 11096387 2 | 294 | T:0.115646                 | C:0.884354      |
| chr28 | 11096613 2 | 312 | C:0.099359                 | A:0.900641      |
| chr28 | 11096615 2 | 312 | C:0.342949                 | T:0.657051      |
| chr28 | 11096744 2 | 254 | C:0.992126                 | T:0.00787402    |
| chr28 | 11096805 2 | 268 | G:0.955224                 | A:0.0447761     |
| chr28 | 11096887 2 | 314 | C:0.0700637                | T:0.929936      |
| chr28 | 11096899 2 | 312 | TTATAA:0.323718            | T:0.676282      |
| chr28 | 11097168 2 | 282 | C:0.904255                 | T:0.0957447     |
| chr28 | 11097174 2 | 280 | T:0.332143                 | C:0.667857      |
| chr28 | 11097222 2 | 276 | G:0.753623                 | T:0.246377      |
| chr28 | 11097772 2 | 298 | T:0.241611                 | C:0.758389      |
| chr28 | 11097881 2 | 284 | G:0.753521                 | T:0.246479      |
| chr28 | 11098026 2 | 280 | A:0.742857                 | C:0.257143      |
| chr28 | 11098304 2 | 274 | G:0.762774                 | T:0.237226      |
| chr28 | 11098527 2 | 296 | A:0.996622                 | G:0.00337838    |
| chr28 | 11098587 2 | 294 | A:0.204082                 | G:0.795918      |
| chr28 | 11098782 2 | 296 | C:0.993243                 | CCTT:0.00675676 |
| chr28 | 11099365 2 | 272 | G:0.889706                 | C:0.110294      |
| chr28 | 11099488 2 | 278 | GA:0.197842                | G:0.802158      |
| chr28 | 11099513 2 | 290 | G:0.782759                 | A:0.217241      |
| chr28 | 11099641 2 | 286 | G:0.737762                 | A:0.262238      |
| chr28 | 11099763 2 | 284 | T:0.950704                 | C:0.0492958     |
| chr28 | 11099799 2 | 284 | A:0.56338                  | G:0.43662       |
| chr28 | 11100187 2 | 282 | T:0.975177                 | C:0.0248227     |
| chr28 | 11100307 2 | 286 | T:0.0769231                | C:0.923077      |
| chr28 | 11100470 2 | 280 | T:0.960714                 | C:0.0392857     |
| chr28 | 11100601 2 | 294 | G:0.785714                 | A:0.214286      |
| chr28 | 11100610 2 | 296 | G:0.959459                 | C:0.0405405     |
| chr28 | 11100623 2 | 296 | G:0.959459                 | A:0.0405405     |
| chr28 | 11100882 2 | 304 | C:0.309211                 | T:0.690789      |
| chr28 | 11101093 2 | 290 | T:0.317241                 | C:0.682759      |
| chr28 | 11101147 2 | 298 | C:0.963087                 | T:0.0369128     |
| chr28 | 11101263 2 | 292 | T:0.938356                 | TA:0.0616438    |
| chr28 | 11101367 2 | 300 | G:0.25 C:0.75              |                 |
| chr28 | 11101835 2 | 302 | C:0.298013                 | T:0.701987      |
| chr28 | 11101862 2 | 284 | T:0.190141                 | TC:0.809859     |
| chr28 | 11101892 2 | 264 | A:0.825758                 | AC:0.174242     |

|       |                                 |   |          |                |              |
|-------|---------------------------------|---|----------|----------------|--------------|
| chr28 | 11102125                        | 2 | 292      | C:0.291096     | T:0.708904   |
| chr28 | 11102168                        | 2 | 288      | C:0.965278     | T:0.0347222  |
| chr28 | 11102205                        | 2 | 288      | C:0.986111     | T:0.0138889  |
| chr28 | 11102340                        | 2 | 294      | G:0.292517     | A:0.707483   |
| chr28 | 11102341                        | 2 | 294      | C:0.904762     | T:0.0952381  |
| chr28 | 11102815                        | 2 | 294      | C:0.972789     | T:0.0272109  |
| chr28 | 11103125                        | 2 | 304      | G:0.296053     | A:0.703947   |
| chr28 | 11103373                        | 2 | 298      | C:0.966443     | G:0.033557   |
| chr28 | 11103479                        | 2 | 306      | C:0.179739     | T:0.820261   |
| chr28 | 11103607                        | 2 | 296      | G:0.293919     | A:0.706081   |
| chr28 | 11103837                        | 2 | 316      | A:0.566456     | AT:0.433544  |
| chr28 | 11104180                        | 2 | 310      | G:0.206452     | A:0.793548   |
| chr28 | 11104411                        | 2 | 292      | G:0.202055     | A:0.797945   |
| chr28 | 11104762                        | 2 | 298      | A:0.825503     | G:0.174497   |
| chr28 | 11104855                        | 2 | 314      | TTGTC:0.910828 | T:0.089172   |
| chr28 | 11105005                        | 2 | 306      | C:0.284314     | A:0.715686   |
| chr28 | 11105189                        | 2 | 304      | T:0.200658     | C:0.799342   |
| chr28 | 11105214                        | 2 | 296      | G:0.787162     | A:0.212838   |
| chr28 | 11105290                        | 2 | 302      | C:0.990066     | A:0.00993377 |
| chr28 | 11105354                        | 2 | 302      | T:0.0960265    | G:0.903974   |
| chr28 | 11105413                        | 2 | 310      | T:0.522581     | A:0.477419   |
| chr28 | 11105483                        | 2 | 300      | C:0.806667     | T:0.193333   |
| chr28 | 11105707                        | 2 | 302      | C:0.788079     | T:0.211921   |
| chr28 | 11105854                        | 2 | 290      | A:0.334483     | AT:0.665517  |
| chr28 | 11105936                        | 2 | 304      | A:0.197368     | C:0.802632   |
| chr28 | 11106029                        | 2 | 288      | C:0.201389     | T:0.798611   |
| chr28 | 11106299                        | 2 | 306      | C:0.418301     | T:0.581699   |
| chr28 | 11106656                        | 2 | 152      | G:0.394737     | C:0.605263   |
| chr28 | 11106834                        | 2 | 272      | GA:0.863971    | G:0.136029   |
| chr28 | 11106854                        | 2 | 276      | GGAA:0.818841  | G:0.181159   |
| chr28 | 11107247                        | 2 | 296      | G:0.766892     | T:0.233108   |
| chr28 | 11107330                        | 2 | 304      | C:0.447368     | G:0.552632   |
| chr28 | 11107343                        | 2 | 306      | A:0.960784     | AG:0.0392157 |
| chr28 | 11107350                        | 2 | 308      | A:0.448052     | C:0.551948   |
| chr28 | 11108437                        | 2 | 288      | A:0.798611     | G:0.201389   |
| chr28 | 11109076                        | 2 | 306      | C:0.830065     | T:0.169935   |
| chr28 | 11109354                        | 2 | 310      | G:0.567742     | GCCCTCTGT:   |
|       | 0.432258                        |   |          |                |              |
| chr28 | 11109367                        | 2 | 310      | C:0.519355     | CTGTCCCTG:   |
|       | 0.480645                        |   |          |                |              |
| chr28 | 11109508                        | 2 | 300      | C:0.833333     | G:0.166667   |
| chr28 | 11109652                        | 2 | 290      | C:0.0344828    | T:0.965517   |
| chr28 | 11109667                        | 2 | 300      | G:0.863333     | A:0.136667   |
| chr28 | 11109813                        | 2 | 294      | G:0.761905     | T:0.238095   |
| chr28 | 11110093                        | 2 | 302      | C:0.433775     | A:0.566225   |
| chr28 | 11110396                        | 2 | 300      | C:0.733333     | T:0.266667   |
| chr28 | 11110523                        | 2 | 300      | T:0.583333     | G:0.416667   |
| chr28 | 11110596                        | 2 | 302      | A:0.854305     | C:0.145695   |
| chr28 | 11110844                        | 2 | 304      | G:0.973684     | A:0.0263158  |
| chr28 | 11111059                        | 2 | 298      | G:0.751678     | A:0.248322   |
| chr28 | 11111267                        | 2 | 304      | T:0.828947     | C:0.171053   |
| chr28 | 11111378                        | 2 | 316      | T:0.838608     |              |
|       | TGCCAGTGGTCCCTGGGCCCTCTTAGAGAA: |   | 0.161392 |                |              |
| chr28 | 11111411                        | 2 | 302      | C:0.990066     | T:0.00993377 |

|                                        |          |   |     |                                |                  |
|----------------------------------------|----------|---|-----|--------------------------------|------------------|
| chr28                                  | 11111442 | 2 | 302 | C:0.761589                     | T:0.238411       |
| chr28                                  | 11111522 | 2 | 302 | G:0.831126                     | C:0.168874       |
| chr28                                  | 11111683 | 2 | 294 | G:0.85034                      | A:0.14966        |
| chr28                                  | 11111688 | 2 | 294 | A:0.85034                      | ACT:0.14966      |
| chr28                                  | 11111767 | 2 | 310 | C:0.832258                     | CTGCCCATTT:      |
| 0.167742                               |          |   |     |                                |                  |
| chr28                                  | 11111835 | 2 | 284 | A:0.84507                      | G:0.15493        |
| chr28                                  | 11111999 | 2 | 288 | G:0.986111                     | A:0.0138889      |
| chr28                                  | 11112156 | 2 | 294 | G:0.765306                     | GGT:0.234694     |
| chr28                                  | 11112381 | 2 | 296 | G:0.814189                     | C:0.185811       |
| chr28                                  | 11112479 | 2 | 306 | T:0.843137                     | A:0.156863       |
| chr28                                  | 11112502 | 2 | 308 | T:0.844156                     | C:0.155844       |
| chr28                                  | 11112579 | 2 | 308 | A:0.834416                     | G:0.165584       |
| chr28                                  | 11112915 | 2 | 294 | T:0.826531                     | C:0.173469       |
| chr28                                  | 11112950 | 2 | 282 | A:0.776596                     | C:0.223404       |
| chr28                                  | 11113095 | 2 | 308 | C:0.86039                      | A:0.13961        |
| chr28                                  | 11113144 | 2 | 308 | C:0.834416                     | G:0.165584       |
| chr28                                  | 11113246 | 2 | 286 | A:0.0979021                    | G:0.902098       |
| chr28                                  | 11113345 | 2 | 302 | CAGT:0.834437                  | C:0.165563       |
| chr28                                  | 11113470 | 2 | 308 | C:0.899351                     | T:0.100649       |
| chr28                                  | 11113826 | 2 | 294 | G:0.860544                     | C:0.139456       |
| chr28                                  | 11113919 | 2 | 298 | G:0.741611                     | T:0.258389       |
| chr28                                  | 11113945 | 2 | 308 | G:0.74026                      | A:0.25974        |
| chr28                                  | 11114003 | 2 | 308 | C:0.996753                     | A:0.00324675     |
| chr28                                  | 11114052 | 2 | 300 | CA:0.83 C:0.17                 |                  |
| chr28                                  | 11114214 | 2 | 296 | T:0.0844595                    | TG:0.915541      |
| chr28                                  | 11114250 | 2 | 306 | G:0.74183                      | GGGCATCA:0.25817 |
| chr28                                  | 11114310 | 2 | 302 | C:0.960265                     | T:0.0397351      |
| chr28                                  | 11114488 | 2 | 288 | G:0.0416667                    | A:0.958333       |
| chr28                                  | 11114644 | 2 | 308 | G:0.840909                     | C:0.159091       |
| chr28                                  | 11114680 | 2 | 298 | C:0.899329                     | A:0.100671       |
| chr28                                  | 11114745 | 2 | 296 | C:0.962838                     | G:0.0371622      |
| chr28                                  | 11114952 | 2 | 286 | T:0.958042                     | G:0.041958       |
| chr28                                  | 11115466 | 2 | 312 | GGTCATCACTCTTTT:0.826923       | G:               |
| 0.173077                               |          |   |     |                                |                  |
| chr28                                  | 11116483 | 2 | 300 | G:0.85 A:0.15                  |                  |
| chr28                                  | 11116748 | 2 | 304 | G:0.766447                     | A:0.233553       |
| chr28                                  | 11116868 | 2 | 300 | C:0.966667                     | T:0.0333333      |
| chr28                                  | 11117470 | 2 | 296 | C:0.969595                     | T:0.0304054      |
| chr28                                  | 11117661 | 2 | 302 | C:0.837748                     | T:0.162252       |
| chr28                                  | 11117865 | 2 | 298 | C:0.0268456                    | G:0.973154       |
| chr28                                  | 11117881 | 2 | 302 | T:0.953642                     | C:0.0463576      |
| chr28                                  | 11117882 | 2 | 302 | G:0.586093                     | A:0.413907       |
| chr28                                  | 11117970 | 2 | 306 | G:0.424837                     | A:0.575163       |
| chr28                                  | 11118123 | 2 | 298 | G:0.775168                     | T:0.224832       |
| chr28                                  | 11118577 | 2 | 288 | G:0.829861                     | A:0.170139       |
| chr28                                  | 11119076 | 3 | 320 | G:0.725 GTGTATATATATA:0.190625 |                  |
| GTGTATATATATATATATATATATATATA:0.084375 |          |   |     |                                |                  |
| chr28                                  | 11119439 | 2 | 294 | TA:0.265306                    | T:0.734694       |
| chr28                                  | 11119460 | 2 | 296 | C:0.584459                     | T:0.415541       |
| chr28                                  | 11119719 | 2 | 306 | AGCCGC:0.470588                | A:0.529412       |
| chr28                                  | 11119758 | 2 | 302 | C:0.993377                     | T:0.00662252     |
| chr28                                  | 11119763 | 2 | 302 | G:0.453642                     | A:0.546358       |
| chr28                                  | 11119851 | 2 | 298 | A:0.83557                      | G:0.16443        |

|              |            |     |                            |               |
|--------------|------------|-----|----------------------------|---------------|
| chr28        | 11119940 2 | 290 | G:0.962069                 | A:0.037931    |
| chr28        | 11119970 2 | 280 | G:0.757143                 | A:0.242857    |
| chr28        | 11120461 2 | 286 | C:0.625874                 | T:0.374126    |
| chr28        | 11120469 2 | 288 | T:0.0381944                | G:0.961806    |
| chr28        | 11120511 2 | 290 | C:0.817241                 | T:0.182759    |
| chr28        | 11120515 2 | 288 | A:0.0381944                | G:0.961806    |
| chr28        | 11120552 2 | 292 | A:0.0342466                | G:0.965753    |
| chr28        | 11120557 2 | 296 | G:0.591216                 | A:0.408784    |
| chr28        | 11120715 2 | 294 | GCCTC:0.840136             | G:0.159864    |
| chr28        | 11120719 2 | 294 | C:0.221088                 | G:0.778912    |
| chr28        | 11121395 2 | 294 | C:0.962585                 | T:0.037415    |
| chr28        | 11122447 2 | 298 | G:0.966443                 | A:0.033557    |
| chr28        | 11122803 2 | 312 | G:0.964744                 | A:0.0352564   |
| chr28        | 11122824 2 | 312 | C:0.576923                 | T:0.423077    |
| chr28        | 11122877 2 | 308 | G:0.448052                 | A:0.551948    |
| chr28        | 11122960 2 | 296 | A:0.929054                 | C:0.0709459   |
| chr28        | 11123223 2 | 202 | AGTGT:0.554455             | A:0.445545    |
| chr28        | 11123436 2 | 178 | C:0.398876                 | T:0.601124    |
| chr28        | 11123464 3 | 106 | G:0.0849057                | GC:0.537736   |
| GCC:0.377358 |            |     |                            |               |
| chr28        | 11123682 2 | 274 | G:0.912409                 | A:0.0875912   |
| chr28        | 11123715 2 | 268 | T:0.955224                 | TAG:0.0447761 |
| chr28        | 11123739 2 | 268 | A:0.58209                  | G:0.41791     |
| chr28        | 11123933 2 | 314 | GTCACCATCCAATGCA:0.598726  |               |
| G:0.401274   |            |     |                            |               |
| chr28        | 11124034 2 | 298 | C:0.624161                 | T:0.375839    |
| chr28        | 11124145 2 | 276 | T:0.561594                 | C:0.438406    |
| chr28        | 11124619 2 | 296 | C:0.753378                 | T:0.246622    |
| chr28        | 11124663 2 | 318 | AGGTGTCGCTATCTGCT:0.666667 |               |
| A:0.333333   |            |     |                            |               |
| chr28        | 11124729 2 | 288 | T:0.607639                 | C:0.392361    |
| chr28        | 11124852 2 | 296 | G:0.766892                 | C:0.233108    |
| chr28        | 11124920 2 | 288 | G:0.965278                 | A:0.0347222   |
| chr28        | 11125055 2 | 282 | G:0.840426                 | A:0.159574    |
| chr28        | 11125076 2 | 280 | T:0.0107143                | C:0.989286    |
| chr28        | 11125082 2 | 286 | A:0.902098                 | G:0.0979021   |
| chr28        | 11125296 2 | 282 | G:0.989362                 | C:0.0106383   |
| chr28        | 11125301 2 | 284 | A:0.838028                 | AG:0.161972   |
| chr28        | 11126251 2 | 304 | G:0.0427632                | A:0.957237    |
| chr28        | 11126751 2 | 302 | A:0.701987                 | T:0.298013    |
| chr28        | 11127161 2 | 296 | T:0.506757                 | TG:0.493243   |
| chr28        | 11127552 2 | 288 | A:0.520833                 | G:0.479167    |
| chr28        | 11127885 2 | 292 | T:0.520548                 | TG:0.479452   |
| chr28        | 11127933 2 | 292 | T:0.489726                 | C:0.510274    |
| chr28        | 11128622 2 | 300 | G:0.456667                 | A:0.543333    |
| chr28        | 11128738 2 | 302 | C:0.97351                  | T:0.0264901   |
| chr28        | 11128850 2 | 312 | T:0.772436                 | C:0.227564    |
| chr28        | 11128854 2 | 310 | C:0.790323                 | T:0.209677    |
| chr28        | 11128957 2 | 300 | C:0.963333                 | T:0.0366667   |
| chr28        | 11129294 2 | 304 | C:0.809211                 | G:0.190789    |
| chr28        | 11129364 2 | 288 | G:0.451389                 | A:0.548611    |
| chr28        | 11129661 2 | 308 | G:0.814935                 | A:0.185065    |
| chr28        | 11129712 2 | 308 | G:0.555195                 | GAGA:0.444805 |
| chr28        | 11129752 2 | 300 | A:0.533333                 | G:0.466667    |

|            |          |   |     |                 |                  |
|------------|----------|---|-----|-----------------|------------------|
| chr28      | 11129795 | 2 | 286 | C:0.534965      | T:0.465035       |
| chr28      | 11129822 | 2 | 298 | A:0.989933      | C:0.0100671      |
| chr28      | 11129834 | 2 | 298 | C:0.768456      | G:0.231544       |
| chr28      | 11129868 | 2 | 292 | A:0.804795      | G:0.195205       |
| chr28      | 11130117 | 2 | 290 | C:0.706897      | T:0.293103       |
| chr28      | 11130274 | 2 | 308 | A:0.762987      | T:0.237013       |
| chr28      | 11130544 | 2 | 312 | G:0.804487      | A:0.195513       |
| chr28      | 11130804 | 2 | 300 | C:0.77          | T:0.23           |
| chr28      | 11130815 | 2 | 300 | C:0.77          | T:0.23           |
| chr28      | 11130859 | 2 | 280 | G:0.767857      | A:0.232143       |
| chr28      | 11131063 | 2 | 300 | T:0.793333      | C:0.206667       |
| chr28      | 11131224 | 2 | 302 | A:0.854305      | T:0.145695       |
| chr28      | 11131264 | 2 | 296 | T:0.0574324     | C:0.942568       |
| chr28      | 11131378 | 2 | 308 | C:0.782468      | T:0.217532       |
| chr28      | 11131401 | 2 | 308 | G:0.782468      | A:0.217532       |
| chr28      | 11131888 | 2 | 264 | C:0.818182      | T:0.181818       |
| chr28      | 11131963 | 2 | 298 | C:0.248322      | T:0.751678       |
| chr28      | 11132199 | 2 | 292 | GAAGC:0.763699  | G:0.236301       |
| chr28      | 11132234 | 2 | 268 | C:0.75          | T:0.25           |
| chr28      | 11132682 | 2 | 302 | CTGGGA:0.748344 | C:0.251656       |
| chr28      | 11132688 | 2 | 300 | T:0.593333      | C:0.406667       |
| chr28      | 11132734 | 2 | 298 | G:0.825503      | T:0.174497       |
| chr28      | 11133031 | 2 | 302 | A:0.764901      | G:0.235099       |
| chr28      | 11133123 | 2 | 306 | A:0.761438      | C:0.238562       |
| chr28      | 11133233 | 2 | 300 | T:0.746667      | C:0.253333       |
| chr28      | 11133371 | 2 | 278 | A:0.730216      | G:0.269784       |
| chr28      | 11133787 | 2 | 298 | T:0.657718      | G:0.342282       |
| chr28      | 11133958 | 2 | 294 | A:0.765306      | T:0.234694       |
| chr28      | 11134127 | 2 | 296 | C:0.760135      | T:0.239865       |
| chr28      | 11134128 | 2 | 294 | A:0.35034       | G:0.64966        |
| chr28      | 11134207 | 2 | 310 | G:0.774194      | GT:0.225806      |
| chr28      | 11134396 | 2 | 306 | C:0.787582      | T:0.212418       |
| chr28      | 11134854 | 2 | 284 | C:0.767606      | G:0.232394       |
| chr28      | 11135111 | 2 | 300 | A:0.77          | T:0.23           |
| chr28      | 11135266 | 2 | 298 | T:0.755034      | C:0.244966       |
| chr28      | 11135305 | 2 | 300 | A:0.776667      | G:0.223333       |
| chr28      | 11135483 | 2 | 290 | G:0.775862      | T:0.224138       |
| chr28      | 11136856 | 2 | 292 | T:0.208904      | G:0.791096       |
| chr28      | 11137017 | 2 | 290 | G:0.813793      | A:0.186207       |
| chr28      | 11137148 | 2 | 306 | G:0.816993      | T:0.183007       |
| chr28      | 11137321 | 2 | 292 | T:0.236301      | C:0.763699       |
| chr28      | 11137812 | 2 | 300 | C:0.853333      | T:0.146667       |
| chr28      | 11138410 | 2 | 288 | C:0.815972      | T:0.184028       |
| chr28      | 11138674 | 2 | 300 | C:0.796667      | T:0.203333       |
| chr28      | 11139107 | 2 | 300 | A:0.783333      | G:0.216667       |
| chr28      | 11139630 | 2 | 310 | G:0.803226      | A:0.196774       |
| chr28      | 11139927 | 2 | 302 | G:0.764901      | A:0.235099       |
| chr28      | 11140069 | 2 | 298 | C:0.768456      | T:0.231544       |
| chr28      | 11141630 | 2 | 246 | CT:0.723577     | C:0.276423       |
| chr28      | 11141693 | 3 | 310 | C:0.487097      | CAGAGAG:0.322581 |
| CAGAGAGAG: | 0.190323 |   |     |                 |                  |
| chr28      | 11141931 | 2 | 302 | A:0.430464      | T:0.569536       |
| chr28      | 11141962 | 2 | 308 | C:0.399351      | T:0.600649       |
| chr28      | 11142267 | 3 | 318 | T:0.603774      | TAACAC:0.138365  |

TAACATAACATAACAC:0.257862

|                   |          |   |                     |                |                 |
|-------------------|----------|---|---------------------|----------------|-----------------|
| chr28             | 11142363 | 2 | 304                 | G:0.529605     | T:0.470395      |
| chr28             | 11142488 | 2 | 300                 | G:0.51 A:0.49  |                 |
| chr28             | 11142555 | 2 | 306                 | CT:0.542484    | C:0.457516      |
| chr28             | 11142679 | 2 | 304                 | A:0.805921     | G:0.194079      |
| chr28             | 11142692 | 2 | 302                 | AC:0.00331126  | A:0.996689      |
| chr28             | 11143194 | 2 | 302                 | T:0.00331126   | C:0.996689      |
| chr28             | 11143261 | 2 | 302                 | T:0.456954     | C:0.543046      |
| chr28             | 11143450 | 2 | 308                 | A:0.441558     | G:0.558442      |
| chr28             | 11144030 | 2 | 296                 | C:0.557432     | G:0.442568      |
| chr28             | 11144307 | 2 | 276                 | T:0.48913      | C:0.51087       |
| chr28             | 11144685 | 2 | 298                 | A:0.0033557    | G:0.996644      |
| chr28             | 11144887 | 2 | 308                 | ACTCT:0.584416 | A:0.415584      |
| chr28             | 11145043 | 2 | 298                 | T:0.0033557    | C:0.996644      |
| chr28             | 11145093 | 2 | 296                 | G:0.820946     | T:0.179054      |
| chr28             | 11145162 | 2 | 302                 | A:0.791391     | G:0.208609      |
| chr28             | 11145354 | 2 | 304                 | A:0.200658     | G:0.799342      |
| chr28             | 11145417 | 2 | 308                 | T:0.844156     | C:0.155844      |
| chr28             | 11145436 | 2 | 302                 | T:0.198675     | C:0.801325      |
| chr28             | 11145448 | 2 | 302                 | C:0.933775     | A:0.0662252     |
| chr28             | 11145545 | 2 | 300                 | G:0.19 T:0.81  |                 |
| chr28             | 11145690 | 2 | 274                 | C:0.60219      | G:0.39781       |
| chr28             | 11146295 | 2 | 300                 | C:0.456667     | T:0.543333      |
| chr28             | 11146472 | 2 | 306                 | C:0.784314     | A:0.215686      |
| chr28             | 11146594 | 2 | 308                 | C:0.24026      | A:0.75974       |
| chr28             | 11146971 | 2 | 298                 | G:0.177852     | GA:0.822148     |
| chr28             | 11146974 | 4 | 310                 | G:0.135484     | GGGAGA:0.283871 |
| GGGAGAGA:0.164516 |          |   | GGGAGAGAGA:0.416129 |                |                 |
| chr28             | 11147054 | 2 | 278                 | C:0.42446      | T:0.57554       |
| chr28             | 11147463 | 2 | 290                 | T:0.844828     | G:0.155172      |
| chr28             | 11147800 | 2 | 278                 | T:0.773381     | C:0.226619      |
| chr28             | 11147871 | 2 | 282                 | G:0.648936     | T:0.351064      |
| chr28             | 11148705 | 2 | 308                 | A:0.62013      | G:0.37987       |
| chr28             | 11148781 | 2 | 300                 | C:0.646667     | T:0.353333      |
| chr28             | 11149467 | 2 | 292                 | C:0.10274      | G:0.89726       |
| chr28             | 11149894 | 2 | 292                 | CT:0.640411    | C:0.359589      |
| chr28             | 11149941 | 2 | 296                 | G:0.837838     | A:0.162162      |
| chr28             | 11150015 | 2 | 308                 | T:0.665584     | C:0.334416      |
| chr28             | 11150447 | 2 | 300                 | T:0.63 C:0.37  |                 |
| chr28             | 11150546 | 2 | 306                 | G:0.24183      | A:0.75817       |
| chr28             | 11150858 | 2 | 300                 | G:0.96 A:0.04  |                 |
| chr28             | 11151445 | 2 | 298                 | G:0.234899     | GGA:0.765101    |
| chr28             | 11151693 | 2 | 288                 | C:0.659722     | G:0.340278      |
| chr28             | 11151793 | 2 | 304                 | C:0.641447     | T:0.358553      |
| chr28             | 11151986 | 2 | 304                 | C:0.648026     | A:0.351974      |
| chr28             | 11152066 | 2 | 306                 | C:0.00653595   | T:0.993464      |
| chr28             | 11152200 | 2 | 296                 | G:0.658784     | A:0.341216      |
| chr28             | 11152206 | 3 | 304                 | CTT:0.694079   | C:0.121711      |
| CTTTT:0.184211    |          |   |                     |                |                 |
| chr28             | 11152336 | 2 | 312                 | G:0.958333     | A:0.0416667     |
| chr28             | 11152348 | 2 | 314                 | C:0.929936     | T:0.0700637     |
| chr28             | 11152491 | 2 | 310                 | T:0.435484     | A:0.564516      |
| chr28             | 11152563 | 2 | 306                 | CAAAT:0.993464 | C:0.00653595    |
| chr28             | 11152752 | 2 | 312                 | T:0.663462     | C:0.336538      |

|                 |          |   |     |               |               |
|-----------------|----------|---|-----|---------------|---------------|
| chr28           | 11153222 | 2 | 302 | A:0.63245     | G:0.36755     |
| chr28           | 11153233 | 2 | 296 | G:0.773649    | T:0.226351    |
| chr28           | 11153341 | 2 | 298 | G:0.714765    | A:0.285235    |
| chr28           | 11153357 | 2 | 298 | A:0.697987    | G:0.302013    |
| chr28           | 11153836 | 2 | 298 | T:0.677852    | G:0.322148    |
| chr28           | 11153872 | 2 | 300 | T:0.79 C:0.21 |               |
| chr28           | 11154148 | 2 | 302 | C:0.788079    | T:0.211921    |
| chr28           | 11154154 | 2 | 302 | A:0.788079    | T:0.211921    |
| chr28           | 11154158 | 2 | 300 | C:0.236667    | T:0.763333    |
| chr28           | 11154931 | 2 | 302 | G:0.536424    | T:0.463576    |
| chr28           | 11155137 | 2 | 290 | TA:0.451724   | T:0.548276    |
| chr28           | 11155363 | 2 | 310 | T:0 TC:1      |               |
| chr28           | 11155369 | 2 | 310 | CA:0 C:1      |               |
| chr28           | 11155378 | 2 | 310 | G:0 GT:1      |               |
| chr28           | 11155382 | 2 | 310 | CT:0 C:1      |               |
| chr28           | 11156260 | 2 | 298 | C:0.765101    | A:0.234899    |
| chr28           | 11156387 | 2 | 280 | TA:0.682143   | T:0.317857    |
| chr28           | 11157509 | 2 | 298 | G:0.755034    | A:0.244966    |
| chr28           | 11157784 | 2 | 288 | A:0.802083    | T:0.197917    |
| chr28           | 11157947 | 2 | 292 | G:0.458904    | A:0.541096    |
| chr28           | 11158269 | 2 | 306 | C:0.761438    | G:0.238562    |
| chr28           | 11158274 | 2 | 306 | C:0.761438    | A:0.238562    |
| chr28           | 11158471 | 2 | 314 | TC:0.990446   | T:0.00955414  |
| chr28           | 11159109 | 2 | 294 | T:0.435374    | C:0.564626    |
| chr28           | 11159293 | 2 | 268 | G:0.936567    | A:0.0634328   |
| chr28           | 11159412 | 2 | 248 | G:0.455645    | T:0.544355    |
| chr28           | 11159430 | 2 | 252 | T:0.535714    | C:0.464286    |
| chr28           | 11159637 | 2 | 302 | C:0.798013    | T:0.201987    |
| chr28           | 11159720 | 2 | 302 | T:0 TA:1      |               |
| chr28           | 11159746 | 2 | 296 | T:0 A:1       |               |
| chr28           | 11159748 | 2 | 296 | T:0 G:1       |               |
| chr28           | 11159924 | 2 | 302 | T:0.774834    | C:0.225166    |
| chr28           | 11160453 | 3 | 304 | GTTT:0.371711 | G:0.536184    |
| GTTTT:0.0921053 |          |   |     |               |               |
| chr28           | 11160461 | 2 | 300 | T:0.456667    | A:0.543333    |
| chr28           | 11160509 | 2 | 300 | G:0.776667    | T:0.223333    |
| chr28           | 11160610 | 2 | 284 | C:0.46831     | T:0.53169     |
| chr28           | 11160754 | 2 | 302 | A:0.456954    | T:0.543046    |
| chr28           | 11161130 | 2 | 300 | C:0.783333    | T:0.216667    |
| chr28           | 11161179 | 2 | 296 | C:0.780405    | T:0.219595    |
| chr28           | 11161218 | 2 | 290 | G:0.437931    | A:0.562069    |
| chr28           | 11161643 | 2 | 276 | T:0.771739    | C:0.228261    |
| chr28           | 11161658 | 2 | 238 | T:0.907563    | TTTC:0.092437 |
| chr28           | 11161676 | 3 | 270 | C:0.411111    | CTTCT:0.22963 |
| CTTCTT:0.359259 |          |   |     |               |               |
| chr28           | 11161715 | 2 | 186 | G:0.634409    | GGA:0.365591  |
| chr28           | 11161760 | 2 | 166 | G:0.590361    | T:0.409639    |
| chr28           | 11162339 | 2 | 296 | T:0.547297    | C:0.452703    |
| chr28           | 11162664 | 2 | 296 | G:0.810811    | A:0.189189    |
| chr28           | 11162702 | 2 | 306 | A:0.545752    | G:0.454248    |
| chr28           | 11162782 | 2 | 294 | A:0.360544    | C:0.639456    |
| chr28           | 11162799 | 2 | 296 | T:0.344595    | C:0.655405    |
| chr28           | 11163218 | 2 | 302 | G:0.774834    | A:0.225166    |
| chr28           | 11163562 | 2 | 310 | T:0.777419    | C:0.222581    |





|                                                           |            |     |                   |                  |
|-----------------------------------------------------------|------------|-----|-------------------|------------------|
| chr28                                                     | 11174963 2 | 298 | G:0.275168        | A:0.724832       |
| chr28                                                     | 11175147 2 | 310 | G:0.564516        | A:0.435484       |
| chr28                                                     | 11175525 2 | 316 | AACTATGC:0.582278 | A:               |
| 0.417722                                                  |            |     |                   |                  |
| chr28                                                     | 11176031 2 | 306 | C:0.584967        | T:0.415033       |
| chr28                                                     | 11177011 2 | 284 | C:0.693662        | T:0.306338       |
| chr28                                                     | 11177390 2 | 294 | A:0.261905        | G:0.738095       |
| chr28                                                     | 11178063 2 | 302 | G:0.288079        | A:0.711921       |
| chr28                                                     | 11178400 2 | 294 | C:0.738095        | T:0.261905       |
| chr28                                                     | 11178599 2 | 304 | A:0.717105        | G:0.282895       |
| chr28                                                     | 11178762 2 | 304 | G:0.717105        | A:0.282895       |
| chr28                                                     | 11179142 2 | 306 | A:0.754902        | C:0.245098       |
| chr28                                                     | 11179183 2 | 304 | T:0 C:1           |                  |
| chr28                                                     | 11179361 2 | 308 | T:0.74026         | C:0.25974        |
| chr28                                                     | 11180159 2 | 300 | G:0.96 GT:0.04    |                  |
| chr28                                                     | 11180194 3 | 298 | CAA:0.033557      | C:0.308725       |
| CA:0.657718                                               |            |     |                   |                  |
| chr28                                                     | 11180350 2 | 296 | GGGA:0.739865     | G:0.260135       |
| chr28                                                     | 11181319 2 | 276 | AC:0.724638       | A:0.275362       |
| chr28                                                     | 11181590 2 | 286 | C:0.70979         | T:0.29021        |
| chr28                                                     | 11182207 2 | 300 | T:0.713333        | C:0.286667       |
| chr28                                                     | 11182463 2 | 300 | G:0.753333        | A:0.246667       |
| chr28                                                     | 11183194 2 | 294 | T:0.789116        | C:0.210884       |
| chr28                                                     | 11183281 2 | 306 | C:0.960784        | T:0.0392157      |
| chr28                                                     | 11183904 2 | 294 | A:0.244898        | G:0.755102       |
| chr28                                                     | 11183920 2 | 306 | A:0.993464        | ATGCTTTGCTT:     |
| 0.00653595                                                |            |     |                   |                  |
| chr28                                                     | 11183967 2 | 308 | T:0.844156        |                  |
| TCTTTTCTTTTCTTTTCTTTC:0.155844                            |            |     |                   |                  |
| chr28                                                     | 11184001 2 | 312 | T:0.961538        | TCTTTTCTTTC:     |
| 0.0384615                                                 |            |     |                   |                  |
| chr28                                                     | 11184021 3 | 312 | T:0.599359        |                  |
| TTTTCTTTCTTTCTTTCTTTCTTTC:0.346154 TTTTCTTTCTTTCTTTCTTTC: |            |     |                   |                  |
| 0.0544872                                                 |            |     |                   |                  |
| chr28                                                     | 11184055 2 | 302 | T:0.953642        | TTCTTTCTTTCTTTC: |
| 0.0463576                                                 |            |     |                   |                  |
| chr28                                                     | 11184072 2 | 302 | C:0.953642        | T:0.0463576      |
| chr28                                                     | 11184191 2 | 280 | C:0.767857        | A:0.232143       |
| chr28                                                     | 11184323 2 | 306 | C:0.254902        | A:0.745098       |
| chr28                                                     | 11184763 2 | 302 | G:0.824503        | C:0.175497       |
| chr28                                                     | 11184784 2 | 308 | G:0.74026         | A:0.25974        |
| chr28                                                     | 11184800 2 | 308 | T:0.74026         | C:0.25974        |
| chr28                                                     | 11184949 2 | 314 | A:0.726115        | AT:0.273885      |
| chr28                                                     | 11185127 2 | 302 | T:0.996689        | C:0.00331126     |
| chr28                                                     | 11185181 2 | 310 | A:0.741935        | T:0.258065       |
| chr28                                                     | 11185384 3 | 284 | A:0.429577        | AGT:0.34507      |
| AGTGT:0.225352                                            |            |     |                   |                  |
| chr28                                                     | 11185526 2 | 290 | A:0.7 G:0.3       |                  |
| chr28                                                     | 11186189 2 | 304 | AG:0.960526       | A:0.0394737      |
| chr28                                                     | 11186315 2 | 304 | T:0.5 G:0.5       |                  |
| chr28                                                     | 11186991 2 | 296 | A:0.209459        | AT:0.790541      |
| chr28                                                     | 11187145 2 | 296 | T:0.668919        | A:0.331081       |
| chr28                                                     | 11187384 3 | 282 | TAC:0.322695      | T:0.397163       |
| TACAC:0.280142                                            |            |     |                   |                  |

|       |          |   |     |                   |               |
|-------|----------|---|-----|-------------------|---------------|
| chr28 | 11187441 | 2 | 284 | T:0.683099        | C:0.316901    |
| chr28 | 11187765 | 2 | 306 | A:0.934641        | G:0.0653595   |
| chr28 | 11187923 | 2 | 308 | A:0.970779        | G:0.0292208   |
| chr28 | 11188230 | 2 | 308 | A:0.188312        | T:0.811688    |
| chr28 | 11188254 | 2 | 306 | T:0.767974        | TTG:0.232026  |
| chr28 | 11188271 | 2 | 296 | A:0.0472973       | T:0.952703    |
| chr28 | 11188390 | 2 | 290 | T:0.965517        | C:0.0344828   |
| chr28 | 11188604 | 2 | 298 | A:0.95302         | AT:0.0469799  |
| chr28 | 11188775 | 2 | 300 | C:0.96 T:0.04     |               |
| chr28 | 11189214 | 2 | 292 | C:0.962329        | T:0.0376712   |
| chr28 | 11189290 | 2 | 304 | A:0.546053        | ATGC:0.453947 |
| chr28 | 11189444 | 2 | 300 | AC:0.96 A:0.04    |               |
| chr28 | 11189943 | 2 | 308 | A:0.194805        | G:0.805195    |
| chr28 | 11189985 | 2 | 300 | G:0.996667        | C:0.00333333  |
| chr28 | 11190134 | 2 | 306 | G:0.74183         | C:0.25817     |
| chr28 | 11190159 | 2 | 302 | T:0.963576        | A:0.0364238   |
| chr28 | 11190487 | 2 | 292 | A:0.19863         | G:0.80137     |
| chr28 | 11190612 | 2 | 306 | C:0.513072        | T:0.486928    |
| chr28 | 11191046 | 2 | 308 | C:0.753247        | A:0.246753    |
| chr28 | 11191548 | 2 | 298 | G:0.97651         | A:0.0234899   |
| chr28 | 11191866 | 2 | 296 | A:0.925676        | G:0.0743243   |
| chr28 | 11191907 | 2 | 298 | A:0.969799        | G:0.0302013   |
| chr28 | 11192501 | 2 | 300 | T:0.186667        | C:0.813333    |
| chr28 | 11193109 | 2 | 298 | G:0.862416        | A:0.137584    |
| chr28 | 11193126 | 2 | 292 | C:0.969178        | T:0.0308219   |
| chr28 | 11193387 | 2 | 298 | A:0.0033557       | C:0.996644    |
| chr28 | 11193427 | 2 | 306 | C:0.859477        | T:0.140523    |
| chr28 | 11193547 | 2 | 310 | A:0.96129         | G:0.0387097   |
| chr28 | 11193767 | 2 | 304 | C:0.851974        | G:0.148026    |
| chr28 | 11194490 | 2 | 304 | C:0.621711        | T:0.378289    |
| chr28 | 11194601 | 2 | 312 | G:0.740385        | A:0.259615    |
| chr28 | 11194606 | 2 | 308 | C:0.165584        | CA:0.834416   |
| chr28 | 11194629 | 2 | 298 | C:0.969799        | T:0.0302013   |
| chr28 | 11194866 | 2 | 308 | G:0.866883        | A:0.133117    |
| chr28 | 11195436 | 2 | 216 | CG:0.680556       | C:0.319444    |
| chr28 | 11195609 | 2 | 280 | A:0.853571        | T:0.146429    |
| chr28 | 11195630 | 2 | 288 | T:0.850694        | A:0.149306    |
| chr28 | 11195750 | 2 | 302 | TTC:0.460265      | T:0.539735    |
| chr28 | 11195893 | 2 | 310 | C:0.619355        | T:0.380645    |
| chr28 | 11196142 | 2 | 304 | C:0.667763        | T:0.332237    |
| chr28 | 11196217 | 2 | 314 | T:0.191083        | C:0.808917    |
| chr28 | 11196473 | 2 | 306 | T:0.457516        | C:0.542484    |
| chr28 | 11196601 | 2 | 306 | CTG:0.836601      | C:0.163399    |
| chr28 | 11197557 | 2 | 312 | C:0.961538        | G:0.0384615   |
| chr28 | 11197560 | 2 | 312 | T:0.721154        | C:0.278846    |
| chr28 | 11197658 | 2 | 312 | A:0.974359        | G:0.025641    |
| chr28 | 11198089 | 2 | 308 | G:0.977273        | A:0.0227273   |
| chr28 | 11198252 | 2 | 312 | T:0.852564        | A:0.147436    |
| chr28 | 11198341 | 2 | 314 | TTA:0.719745      | T:0.280255    |
| chr28 | 11198570 | 2 | 304 | T:0.733553        | C:0.266447    |
| chr28 | 11198628 | 2 | 304 | A:0.1875 G:0.8125 |               |
| chr28 | 11198887 | 2 | 304 | T:0.651316        | C:0.348684    |
| chr28 | 11199236 | 2 | 308 | AAAG:0.970779     | A:0.0292208   |
| chr28 | 11199522 | 2 | 298 | T:0.194631        | TAC:0.805369  |

|                  |          |   |     |                 |              |
|------------------|----------|---|-----|-----------------|--------------|
| chr28            | 11199864 | 2 | 292 | A:0.715753      | T:0.284247   |
| chr28            | 11199915 | 2 | 300 | T:0.183333      | C:0.816667   |
| chr28            | 11200037 | 2 | 310 | C:0.703226      | T:0.296774   |
| chr28            | 11200262 | 2 | 306 | T:0.196078      | A:0.803922   |
| chr28            | 11200286 | 2 | 306 | C:0.964052      | T:0.0359477  |
| chr28            | 11200366 | 2 | 296 | C:0.989865      | T:0.0101351  |
| chr28            | 11200434 | 2 | 302 | ATAG:0.665563   | A:0.334437   |
| chr28            | 11200515 | 2 | 306 | A:0.849673      | C:0.150327   |
| chr28            | 11200585 | 2 | 298 | A:0.708054      | AAG:0.291946 |
| chr28            | 11200769 | 2 | 280 | AT:0.664286     | A:0.335714   |
| chr28            | 11200827 | 2 | 292 | C:0.876712      | T:0.123288   |
| chr28            | 11201104 | 2 | 302 | G:0.725166      | A:0.274834   |
| chr28            | 11201365 | 2 | 312 | T:0.983974      | C:0.0160256  |
| chr28            | 11201602 | 2 | 308 | T:0.967532      | C:0.0324675  |
| chr28            | 11201640 | 2 | 310 | C:0.977419      | T:0.0225806  |
| chr28            | 11201650 | 2 | 308 | A:0.821429      | G:0.178571   |
| chr28            | 11201836 | 2 | 292 | G:0.630137      | A:0.369863   |
| chr28            | 11202021 | 2 | 272 | CAAAAA:0.75     | C:0.25       |
| chr28            | 11202039 | 2 | 272 | CAA:0.75 C:0.25 |              |
| chr28            | 11202048 | 2 | 282 | C:0.663121      | A:0.336879   |
| chr28            | 11202051 | 2 | 272 | AAAAAAC:0.75    | A:0.25       |
| chr28            | 11202054 | 3 | 284 | A:0.665493      | AAC:0.221831 |
| AACAAAC:0.112676 |          |   |     |                 |              |
| chr28            | 11202060 | 2 | 284 | A:0.81338       | C:0.18662    |
| chr28            | 11202122 | 2 | 240 | C:0.625 T:0.375 |              |
| chr28            | 11202791 | 2 | 300 | T:0.223333      | C:0.776667   |
| chr28            | 11202793 | 2 | 300 | G:0.97 T:0.03   |              |
| chr28            | 11203019 | 2 | 296 | G:0.679054      | T:0.320946   |
| chr28            | 11203521 | 2 | 294 | A:0.187075      | G:0.812925   |
| chr28            | 11203603 | 2 | 318 | T:0.72327       | C:0.27673    |
| chr28            | 11204127 | 2 | 290 | A:0.82069       | G:0.17931    |
| chr28            | 11204563 | 2 | 306 | A:0.980392      | T:0.0196078  |
| chr28            | 11204776 | 2 | 302 | G:0.619205      | A:0.380795   |
| chr28            | 11204816 | 2 | 304 | T:0.184211      | A:0.815789   |
| chr28            | 11205012 | 2 | 312 | ATGTC:0.974359  | A:0.025641   |
| chr28            | 11205127 | 2 | 306 | A:0.702614      | G:0.297386   |
| chr28            | 11205576 | 2 | 300 | C:0.616667      | T:0.383333   |
| chr28            | 11205841 | 2 | 298 | A:0.875839      | C:0.124161   |
| chr28            | 11206426 | 2 | 300 | A:0.363333      | G:0.636667   |
| chr28            | 11206441 | 2 | 304 | T:0.996711      | G:0.00328947 |
| chr28            | 11207252 | 2 | 282 | T:0.843972      | G:0.156028   |
| chr28            | 11207309 | 2 | 300 | A:0.97 T:0.03   |              |
| chr28            | 11207665 | 2 | 296 | A:0.00337838    | C:0.996622   |
| chr28            | 11207955 | 2 | 310 | C:0.977419      | T:0.0225806  |
| chr28            | 11208138 | 2 | 316 | A:0.664557      | T:0.335443   |
| chr28            | 11208478 | 3 | 304 | TA:0.286184     | T:0.473684   |
| TAA:0.240132     |          |   |     |                 |              |
| chr28            | 11209025 | 2 | 306 | C:0.996732      | T:0.00326797 |
| chr28            | 11209347 | 2 | 300 | G:0.00333333    | A:0.996667   |
| chr28            | 11209461 | 2 | 302 | G:0.00331126    | A:0.996689   |
| chr28            | 11209546 | 2 | 312 | C:0.974359      | T:0.025641   |
| chr28            | 11209700 | 2 | 304 | G:0.970395      | A:0.0296053  |
| chr28            | 11209761 | 2 | 300 | C:0.99 A:0.01   |              |
| chr28            | 11210712 | 2 | 300 | G:0.963333      | T:0.0366667  |

|                          |          |   |     |               |                 |
|--------------------------|----------|---|-----|---------------|-----------------|
| chr28                    | 11211044 | 2 | 306 | C:0.892157    | T:0.107843      |
| chr28                    | 11211268 | 2 | 310 | G:0.016129    | GAACAA:0.983871 |
| chr28                    | 11211479 | 2 | 314 | G:0.812102    | A:0.187898      |
| chr28                    | 11211761 | 2 | 308 | G:0.977273    | A:0.0227273     |
| chr28                    | 11211804 | 2 | 296 | CT:0.648649   | C:0.351351      |
| chr28                    | 11211807 | 3 | 300 | TAA:0.406667  | T:0.54 TA:      |
| 0.0533333                |          |   |     |               |                 |
| chr28                    | 11211844 | 2 | 298 | A:0.600671    | AGAGAGAGC:      |
| 0.399329                 |          |   |     |               |                 |
| chr28                    | 11212061 | 2 | 302 | G:0.645695    | A:0.354305      |
| chr28                    | 11212096 | 2 | 300 | C:0.986667    | A:0.0133333     |
| chr28                    | 11212224 | 3 | 282 | A:0.560284    | AT:0.361702     |
| ATT:0.0780142            |          |   |     |               |                 |
| chr28                    | 11212567 | 2 | 308 | G:0.899351    | A:0.100649      |
| chr28                    | 11212891 | 2 | 296 | G:0.952703    | A:0.0472973     |
| chr28                    | 11213287 | 2 | 310 | C:0.996774    | T:0.00322581    |
| chr28                    | 11213555 | 2 | 310 | A:0.977419    | G:0.0225806     |
| chr28                    | 11213752 | 2 | 314 | T:0.401274    | C:0.598726      |
| chr28                    | 11214289 | 2 | 306 | C:0.594771    | T:0.405229      |
| chr28                    | 11214381 | 2 | 306 | AAGG:0.764706 | A:0.235294      |
| chr28                    | 11215670 | 2 | 298 | A:0.214765    | G:0.785235      |
| chr28                    | 11215677 | 2 | 298 | G:0.61745     | A:0.38255       |
| chr28                    | 11215769 | 2 | 300 | G:0.806667    | A:0.193333      |
| chr28                    | 11215833 | 4 | 300 | CTTTT:0.1     | C:0.366667      |
| CT:0.356667 CTT:0.176667 |          |   |     |               |                 |
| chr28                    | 11216573 | 2 | 306 | C:0.980392    | T:0.0196078     |
| chr28                    | 11216594 | 2 | 296 | T:0.00337838  | C:0.996622      |
| chr28                    | 11216783 | 2 | 290 | C:0.575862    | T:0.424138      |
| chr28                    | 11217136 | 2 | 248 | C:0.596774    | CT:0.403226     |
| chr28                    | 11217137 | 2 | 258 | T:0.717054    | TTC:0.282946    |
| chr28                    | 11217798 | 2 | 298 | A:0.66443     | T:0.33557       |
| chr28                    | 11217871 | 2 | 302 | C:0.427152    | T:0.572848      |
| chr28                    | 11217999 | 2 | 302 | A:0.430464    | C:0.569536      |
| chr28                    | 11218337 | 2 | 308 | A:0.538961    | G:0.461039      |
| chr28                    | 11218584 | 2 | 300 | G:0.43 A:0.57 |                 |
| chr28                    | 11218635 | 2 | 298 | G:0.42953     | A:0.57047       |
| chr28                    | 11218794 | 2 | 306 | C:0.434641    | A:0.565359      |
| chr28                    | 11218823 | 2 | 304 | G:0.621711    | A:0.378289      |
| chr28                    | 11218863 | 2 | 298 | C:0.0033557   | A:0.996644      |
| chr28                    | 11219026 | 2 | 298 | T:0.473154    | G:0.526846      |
| chr28                    | 11219082 | 2 | 290 | G:0.468966    | A:0.531034      |
| chr28                    | 11219280 | 2 | 294 | C:0.812925    | G:0.187075      |
| chr28                    | 11219290 | 2 | 296 | A:0.554054    | G:0.445946      |
| chr28                    | 11219442 | 2 | 292 | CA:0.534247   | C:0.465753      |
| chr28                    | 11219505 | 2 | 300 | C:0.576667    | T:0.423333      |
| chr28                    | 11219509 | 2 | 300 | A:0.576667    | G:0.423333      |
| chr28                    | 11219847 | 3 | 282 | GT:0.43617    | G:0.180851      |
| GTT:0.382979             |          |   |     |               |                 |
| chr28                    | 11220133 | 2 | 294 | C:0.744898    | T:0.255102      |
| chr28                    | 11220284 | 2 | 302 | C:0.94702     | T:0.0529801     |
| chr28                    | 11220447 | 2 | 302 | C:0.801325    | T:0.198675      |
| chr28                    | 11220625 | 2 | 300 | C:0.57 T:0.43 |                 |
| chr28                    | 11220870 | 2 | 294 | A:0.707483    | C:0.292517      |
| chr28                    | 11220884 | 2 | 296 | A:0.584459    | G:0.415541      |

|                                    |          |   |     |                      |                 |
|------------------------------------|----------|---|-----|----------------------|-----------------|
| chr28                              | 11220953 | 2 | 300 | G:0.563333           | A:0.436667      |
| chr28                              | 11221023 | 2 | 294 | T:0.55102            | C:0.44898       |
| chr28                              | 11221156 | 2 | 308 | C:0.961039           | G:0.038961      |
| chr28                              | 11221493 | 3 | 298 | C:0.348993           | CT:0.560403     |
| CTT:0.090604                       |          |   |     |                      |                 |
| chr28                              | 11221594 | 3 | 302 | GTCTCTC:0.460265     | G:0.291391      |
| GTC:0.248344                       |          |   |     |                      |                 |
| chr28                              | 11221603 | 2 | 264 | TCTCTCTCACA:0.939394 | T:              |
| 0.0606061                          |          |   |     |                      |                 |
| chr28                              | 11221609 | 2 | 290 | T:0.672414           | A:0.327586      |
| chr28                              | 11222176 | 2 | 302 | G:0.751656           | T:0.248344      |
| chr28                              | 11222232 | 2 | 302 | CAG:0.940397         | C:0.0596026     |
| chr28                              | 11222269 | 2 | 302 | C:0.698675           | T:0.301325      |
| chr28                              | 11222455 | 2 | 300 | T:0.26               | C:0.74          |
| chr28                              | 11222692 | 2 | 306 | G:0.19281            | A:0.80719       |
| chr28                              | 11222935 | 2 | 302 | G:0.953642           | A:0.0463576     |
| chr28                              | 11222971 | 2 | 310 | T:0.203226           | C:0.796774      |
| chr28                              | 11223019 | 2 | 318 | A:0.578616           | ACCCCCATTACCCT: |
| 0.421384                           |          |   |     |                      |                 |
| chr28                              | 11223059 | 2 | 304 | A:0.259868           | C:0.740132      |
| chr28                              | 11223154 | 2 | 292 | G:0.315068           | A:0.684932      |
| chr28                              | 11223202 | 2 | 308 | T:0.331169           | G:0.668831      |
| chr28                              | 11223225 | 2 | 308 | T:0.974026           | G:0.025974      |
| chr28                              | 11223363 | 2 | 298 | C:0.741611           | T:0.258389      |
| chr28                              | 11223455 | 2 | 300 | T:0.56               | C:0.44          |
| chr28                              | 11223465 | 2 | 300 | G:0.56               | A:0.44          |
| chr28                              | 11223475 | 2 | 300 | G:0.943333           | A:0.0566667     |
| chr28                              | 11224210 | 2 | 312 | T:0.942308           | C:0.0576923     |
| chr28                              | 11224549 | 2 | 304 | C:0.953947           | T:0.0460526     |
| chr28                              | 11225235 | 2 | 296 | A:0.472973           | G:0.527027      |
| chr28                              | 11225598 | 2 | 304 | C:0.960526           | T:0.0394737     |
| chr28                              | 11225914 | 2 | 274 | C:0.737226           | CCCA:0.262774   |
| chr28                              | 11226115 | 2 | 292 | A:0.945205           | T:0.0547945     |
| chr28                              | 11226301 | 2 | 258 | C:0.806202           | T:0.193798      |
| chr28                              | 11228114 | 2 | 226 | G:0.628319           | GC:0.371681     |
| chr28                              | 11228121 | 2 | 238 | CG:0.97479           | C:0.0252101     |
| chr28                              | 11228125 | 2 | 234 | C:0.645299           | G:0.354701      |
| chr28                              | 11228255 | 2 | 242 | T:0.797521           | A:0.202479      |
| chr28                              | 11228427 | 2 | 286 | G:0.968531           | C:0.0314685     |
| chr28                              | 11228779 | 4 | 310 | AAC:0.609677         | A:0.0290323     |
| AACAC:0.0387097 AACACACAC:0.322581 |          |   |     |                      |                 |
| chr28                              | 11229233 | 2 | 300 | C:0.926667           | T:0.0733333     |
| chr28                              | 11229617 | 2 | 288 | A:0.0104167          | T:0.989583      |
| chr28                              | 11229875 | 2 | 288 | C:0.465278           | A:0.534722      |
| chr28                              | 11229901 | 2 | 288 | T:0.611111           | C:0.388889      |
| chr28                              | 11229938 | 2 | 292 | G:0.64726            | GC:0.35274      |
| chr28                              | 11230222 | 2 | 308 | C:0.412338           | T:0.587662      |
| chr28                              | 11230368 | 2 | 302 | T:0.976821           | C:0.0231788     |
| chr28                              | 11230391 | 2 | 304 | A:0.970395           | C:0.0296053     |
| chr28                              | 11230393 | 2 | 304 | TC:0.970395          | T:0.0296053     |
| chr28                              | 11230722 | 2 | 288 | C:0.392361           | T:0.607639      |
| chr28                              | 11230730 | 2 | 290 | C:0.975862           | T:0.0241379     |
| chr28                              | 11230739 | 2 | 284 | C:0.0105634          | T:0.989437      |
| chr28                              | 11230799 | 2 | 310 | GTGTCTGTCTC:0.603226 | G:              |

0.396774

|               |            |     |             |              |
|---------------|------------|-----|-------------|--------------|
| chr28         | 11230977 2 | 292 | C:0.770548  | T:0.229452   |
| chr28         | 11231111 2 | 294 | A:0 G:1     |              |
| chr28         | 11231332 2 | 260 | T:0.646154  | G:0.353846   |
| chr28         | 11231353 2 | 290 | AC:0.958621 | A:0.0413793  |
| chr28         | 11231357 3 | 290 | A:0.937931  | C:0.0413793  |
| AAC:0.0206897 |            |     |             |              |
| chr28         | 11231362 3 | 290 | C:0.434483  | A:0.52069    |
| CA:0.0448276  |            |     |             |              |
| chr28         | 11231364 2 | 290 | AAC:0.97931 | A:0.0206897  |
| chr28         | 11231505 2 | 298 | C:0.651007  | T:0.348993   |
| chr28         | 11231888 2 | 308 | T:0.487013  | C:0.512987   |
| chr28         | 11231912 2 | 312 | G:0.483974  | A:0.516026   |
| chr28         | 11232195 2 | 314 | G:0.987261  | A:0.0127389  |
| chr28         | 11232372 2 | 302 | C:0.523179  | G:0.476821   |
| chr28         | 11232389 2 | 302 | C:0.536424  | T:0.463576   |
| chr28         | 11232628 2 | 298 | C:0.526846  | T:0.473154   |
| chr28         | 11232632 2 | 298 | T:0.526846  | C:0.473154   |
| chr28         | 11232796 2 | 298 | A:0.533557  | G:0.466443   |
| chr28         | 11232823 2 | 300 | A:0.866667  | G:0.133333   |
| chr28         | 11232935 2 | 302 | C:0.516556  | T:0.483444   |
| chr28         | 11233037 2 | 304 | A:0.539474  | G:0.460526   |
| chr28         | 11233049 2 | 304 | A:0.539474  | G:0.460526   |
| chr28         | 11233051 2 | 304 | T:0.539474  | C:0.460526   |
| chr28         | 11233069 2 | 304 | T:0.539474  | C:0.460526   |
| chr28         | 11233204 2 | 308 | G:0.99026   | T:0.00974026 |
| chr28         | 11233366 2 | 296 | A:0.496622  | T:0.503378   |
| chr28         | 11233477 2 | 300 | C:0.523333  | T:0.476667   |
| chr28         | 11234054 3 | 284 | T:0.485915  | TA:0.454225  |
| TAA:0.0598592 |            |     |             |              |
| chr28         | 11234137 2 | 298 | A:0.0436242 | C:0.956376   |
| chr28         | 11234325 2 | 308 | C:0.519481  | G:0.480519   |
| chr28         | 11234378 2 | 302 | G:0.503311  | T:0.496689   |
| chr28         | 11234982 2 | 284 | G:0.517606  | A:0.482394   |
| chr28         | 11234992 2 | 284 | G:0.517606  | A:0.482394   |
| chr28         | 11235094 2 | 256 | T:0.503906  | C:0.496094   |
| chr28         | 11235251 2 | 300 | T:0.486667  | C:0.513333   |
| chr28         | 11235275 2 | 302 | G:0.798013  | A:0.201987   |
| chr28         | 11235614 2 | 294 | A:0.496599  | G:0.503401   |
| chr28         | 11235736 2 | 294 | C:0.452381  | T:0.547619   |
| chr28         | 11235988 2 | 304 | T:0.470395  | C:0.529605   |
| chr28         | 11236283 2 | 290 | G:0.534483  | T:0.465517   |
| chr28         | 11236285 2 | 290 | G:0.534483  | T:0.465517   |
| chr28         | 11236615 2 | 304 | G:0.5 A:0.5 |              |
| chr28         | 11236617 2 | 304 | A:0.5 C:0.5 |              |
| chr28         | 11237023 2 | 308 | C:0.535714  | T:0.464286   |
| chr28         | 11237126 2 | 304 | A:0.532895  | AT:0.467105  |
| chr28         | 11237137 2 | 304 | T:0.532895  | G:0.467105   |
| chr28         | 11237162 2 | 304 | C:0.532895  | G:0.467105   |
| chr28         | 11237215 2 | 308 | A:0.538961  | C:0.461039   |
| chr28         | 11237220 2 | 308 | C:0.538961  | G:0.461039   |
| chr28         | 11237236 2 | 302 | A:0.0165563 | G:0.983444   |
| chr28         | 11237285 2 | 310 | T:0.519355  | TAA:0.480645 |
| chr28         | 11237310 2 | 310 | A:0.519355  | T:0.480645   |

|                           |          |   |     |                      |                   |
|---------------------------|----------|---|-----|----------------------|-------------------|
| chr28                     | 11237500 | 2 | 296 | T:0.989865           | C:0.0101351       |
| chr28                     | 11237567 | 2 | 310 | A:0.516129           | G:0.483871        |
| chr28                     | 11237652 | 2 | 298 | T:0.526846           | C:0.473154        |
| chr28                     | 11237739 | 2 | 304 | G:0.967105           | A:0.0328947       |
| chr28                     | 11237785 | 2 | 302 | A:0.993377           | T:0.00662252      |
| chr28                     | 11237827 | 2 | 290 | A:0.493103           | G:0.506897        |
| chr28                     | 11237836 | 2 | 290 | C:0.882759           | T:0.117241        |
| chr28                     | 11237954 | 2 | 300 | G:0.513333           | C:0.486667        |
| chr28                     | 11238024 | 2 | 306 | T:0.51634            | G:0.48366         |
| chr28                     | 11238028 | 2 | 306 | G:0.51634            | A:0.48366         |
| chr28                     | 11238594 | 2 | 304 | T:0.539474           | C:0.460526        |
| chr28                     | 11238761 | 2 | 284 | G:0.545775           | C:0.454225        |
| chr28                     | 11238777 | 2 | 300 | C:0.973333           | T:0.0266667       |
| chr28                     | 11238894 | 2 | 300 | G:0.533333           | A:0.466667        |
| chr28                     | 11238981 | 2 | 298 | G:0.520134           | A:0.479866        |
| chr28                     | 11239148 | 2 | 304 | G:0.536184           | A:0.463816        |
| chr28                     | 11239320 | 2 | 300 | G:0.523333           | A:0.476667        |
| chr28                     | 11239352 | 3 | 276 | GT:0.456522          | G:0.0905797       |
| GTT:0.452899              |          |   |     |                      |                   |
| chr28                     | 11239856 | 2 | 300 | TA:0.983333          | T:0.0166667       |
| chr28                     | 11240512 | 2 | 270 | C:0.533333           | T:0.466667        |
| chr28                     | 11241265 | 2 | 296 | G:0.952703           | T:0.0472973       |
| chr28                     | 11241476 | 2 | 286 | G:0.548951           | A:0.451049        |
| chr28                     | 11241518 | 2 | 264 | C:0.969697           | T:0.030303        |
| chr28                     | 11241600 | 2 | 234 | G:0.534188           | C:0.465812        |
| chr28                     | 11241628 | 2 | 304 | T:0.901316           | TAAAAAA:0.0986842 |
| chr28                     | 11241629 | 3 | 306 | T:0.617647           | A:0.281046        |
| TAAA:0.101307             |          |   |     |                      |                   |
| chr28                     | 11241715 | 2 | 306 | G:0.0196078          | A:0.980392        |
| chr28                     | 11241740 | 2 | 304 | A:0.5 T:0.5          |                   |
| chr28                     | 11241788 | 2 | 270 | T:0.559259           | A:0.440741        |
| chr28                     | 11241891 | 2 | 298 | C:0.563758           | T:0.436242        |
| chr28                     | 11242060 | 2 | 294 | G:0.0340136          | T:0.965986        |
| chr28                     | 11242096 | 2 | 300 | G:0.966667           | A:0.0333333       |
| chr28                     | 11242382 | 2 | 300 | AG:0.976667          | A:0.0233333       |
| chr28                     | 11243014 | 2 | 290 | T:0.955172           | C:0.0448276       |
| chr28                     | 11243101 | 5 | 314 | CT:0.248408          | C:0.0477707       |
| CTT:0.318471 CTTT:0.10828 |          |   |     |                      |                   |
| chr28                     | 11244344 | 2 | 292 | C:0.969178           | T:0.0308219       |
| chr28                     | 11244417 | 2 | 290 | A:0.975862           | G:0.0241379       |
| chr28                     | 11244560 | 2 | 292 | ATCTCTCTCTC:0.363014 | A:                |
| 0.636986                  |          |   |     |                      |                   |
| chr28                     | 11244902 | 2 | 304 | G:0.549342           | A:0.450658        |
| chr28                     | 11245275 | 2 | 306 | C:0.519608           | T:0.480392        |
| chr28                     | 11245411 | 2 | 296 | G:0.506757           | C:0.493243        |
| chr28                     | 11245427 | 2 | 298 | C:0.986577           | T:0.0134228       |
| chr28                     | 11245898 | 2 | 304 | C:0.486842           | T:0.513158        |
| chr28                     | 11245938 | 3 | 304 | G:0.950658           | A:0.0394737       |
| T:0.00986842              |          |   |     |                      |                   |
| chr28                     | 11245946 | 2 | 302 | C:0.817881           | A:0.182119        |
| chr28                     | 11246330 | 2 | 296 | G:0.993243           | A:0.00675676      |
| chr28                     | 11246627 | 2 | 294 | A:0.97619            | G:0.0238095       |
| chr28                     | 11246725 | 2 | 294 | G:0.503401           | C:0.496599        |
| chr28                     | 11246979 | 2 | 286 | T:0.979021           | G:0.020979        |

|                                     |          |   |     |                        |                |
|-------------------------------------|----------|---|-----|------------------------|----------------|
| chr28                               | 11247420 | 2 | 298 | G:0.973154             | A:0.0268456    |
| chr28                               | 11247430 | 2 | 308 | A:0.987013             | G:0.012987     |
| chr28                               | 11247484 | 2 | 316 | G:0.737342             | A:0.262658     |
| chr28                               | 11247492 | 2 | 314 | T:0.993631             | C:0.00636943   |
| chr28                               | 11247544 | 2 | 302 | T:0.956954             | C:0.0430464    |
| chr28                               | 11248338 | 2 | 304 | C:0.993421             | T:0.00657895   |
| chr28                               | 11248459 | 2 | 304 | GTCAAA:0.486842        | G:0.513158     |
| chr28                               | 11248466 | 2 | 304 | G:0.486842             | GGCC:0.513158  |
| chr28                               | 11248468 | 2 | 304 | C:0.486842             | CAG:0.513158   |
| chr28                               | 11248509 | 2 | 306 | G:0.761438             | A:0.238562     |
| chr28                               | 11248833 | 2 | 300 | C:0.97 T:0.03          |                |
| chr28                               | 11248948 | 2 | 312 | G:0.964744             | C:0.0352564    |
| chr28                               | 11249268 | 2 | 300 | C:0.993333             | T:0.00666667   |
| chr28                               | 11249413 | 2 | 304 | C:0.973684             | G:0.0263158    |
| chr28                               | 11249510 | 2 | 298 | C:0.993289             | A:0.00671141   |
| chr28                               | 11249816 | 2 | 306 | T:0.905229             | C:0.0947712    |
| chr28                               | 11249942 | 2 | 300 | T:0.963333             | C:0.0366667    |
| chr28                               | 11249996 | 2 | 298 | T:0.661074             | TTC:0.338926   |
| chr28                               | 11250040 | 2 | 316 | G:0.727848             | GTCTC:0.272152 |
| chr28                               | 11250044 | 2 | 310 | C:0.993548             | CTG:0.00645161 |
| chr28                               | 11250047 | 2 | 280 | TCTCACACACACA:0.821429 | T:             |
| 0.178571                            |          |   |     |                        |                |
| chr28                               | 11250049 | 2 | 306 | TCACA:0.986928         | T:0.0130719    |
| chr28                               | 11250055 | 2 | 308 | A:0.99026              | T:0.00974026   |
| chr28                               | 11250057 | 2 | 308 | A:0.99026              | T:0.00974026   |
| chr28                               | 11250059 | 2 | 308 | A:0.99026              | T:0.00974026   |
| chr28                               | 11250061 | 2 | 284 | A:0.992958             | T:0.00704225   |
| chr28                               | 11250063 | 2 | 274 | A:0.989051             | T:0.0109489    |
| chr28                               | 11250065 | 2 | 274 | A:0.989051             | T:0.0109489    |
| chr28                               | 11250313 | 2 | 298 | C:0.959732             | T:0.0402685    |
| chr28                               | 11250331 | 2 | 296 | T:0.75 C:0.25          |                |
| chr28                               | 11250705 | 2 | 300 | A:0.95 G:0.05          |                |
| chr28                               | 11251322 | 2 | 300 | T:0.99 C:0.01          |                |
| chr28                               | 11251447 | 2 | 298 | T:0.989933             | C:0.0100671    |
| chr28                               | 11251462 | 2 | 296 | G:0.935811             | A:0.0641892    |
| chr28                               | 11251590 | 2 | 298 | GT:0.95302             | G:0.0469799    |
| chr28                               | 11251993 | 2 | 310 | C:0.990323             | T:0.00967742   |
| chr28                               | 11252102 | 2 | 302 | T:0.983444             | C:0.0165563    |
| chr28                               | 11252187 | 2 | 310 | C:0.751613             | G:0.248387     |
| chr28                               | 11252656 | 2 | 314 | C:0.974522             | A:0.0254777    |
| chr28                               | 11252805 | 4 | 316 | CTTCT:0.75             | C:0.0474684    |
| CTTTCT:0.136076 CTTCTTTCT:0.0664557 |          |   |     |                        |                |
| chr28                               | 11252860 | 2 | 316 | C:0.987342             | CT:0.0126582   |
| chr28                               | 11253422 | 2 | 300 | G:0.946667             | T:0.0533333    |
| chr28                               | 11253544 | 2 | 306 | G:0.941176             | C:0.0588235    |
| chr28                               | 11253727 | 2 | 294 | C:0.755102             | G:0.244898     |
| chr28                               | 11253832 | 2 | 302 | C:0.741722             | T:0.258278     |
| chr28                               | 11253984 | 2 | 296 | G:0.523649             | A:0.476351     |
| chr28                               | 11254421 | 2 | 304 | C:0.990132             | T:0.00986842   |
| chr28                               | 11254589 | 2 | 298 | G:0.959732             | A:0.0402685    |
| chr28                               | 11254881 | 2 | 302 | A:0.824503             | G:0.175497     |
| chr28                               | 11255004 | 2 | 306 | G:0.95098              | C:0.0490196    |
| chr28                               | 11255252 | 2 | 302 | GC:0.983444            | G:0.0165563    |
| chr28                               | 11255254 | 2 | 302 | C:0.983444             | A:0.0165563    |



chr28 11255404 2 304 T:0.743421 C:0.256579  
chr28 11255687 2 294 CT:0.986395 C:0.0136054  
chr28 11255734 2 302 T:0.745033 C:0.254967  
chr28 11256193 2 306 T:0.960784 A:0.0392157  
chr28 11256194 2 308 A:0.746753 G:0.253247  
chr28 11256428 2 306 G:0.718954 A:0.281046  
chr28 11256480 2 310 T:0.190323 A:0.809677  
chr28 11256678 2 302 G:0.711921 A:0.288079  
chr28 11256791 2 220 AG:0.818182 A:0.181818  
chr28 11257115 2 312 G:0.99359 A:0.00641026  
chr28 11257131 2 308 A:0.714286 G:0.285714  
chr28 11257256 2 300 A:0.73 G:0.27  
chr28 11257622 2 302 T:0.738411 A:0.261589  
chr28 11257676 2 298 T:0.761745 C:0.238255  
chr28 11257751 2 306 G:0.75817 A:0.24183  
chr28 11257777 2 310 T:0.735484 C:0.264516  
chr28 11257868 2 308 T:0.363636 C:0.636364  
chr28 11257917 2 306 A:0.745098 T:0.254902  
chr28 11257919 2 306 A:0.745098 C:0.254902  
chr28 11257986 2 298 C:0.842282 T:0.157718  
chr28 11258344 2 284 G:0.767606 GT:0.232394  
chr28 11258384 2 304 GATGGGTAA:0.888158 G:  
0.111842  
chr28 11258487 2 282 C:0.989362 T:0.0106383  
chr28 11258540 2 276 A:0 G:1  
chr28 11258557 2 274 A:0.711679 G:0.288321  
chr28 11258598 2 296 A:0 G:1  
chr28 11258631 2 288 A:0.975694 C:0.0243056  
chr28 11259057 2 268 C:0.768657 A:0.231343  
chr28 11259219 2 278 G:0.931655 A:0.0683453  
chr28 11259309 2 292 C:0.996575 T:0.00342466  
chr28 11259354 2 286 T:0.22028 C:0.77972  
chr28 11259463 2 288 G:0.711806 A:0.288194  
chr28 11259464 2 288 T:0.711806 C:0.288194  
chr28 11259560 2 318 T:0.801887 TC:0.198113  
chr28 11259577 3 320 C:0.3125 CT:0.634375  
CTTTTCTTTTCTTTTCT:0.053125  
chr28 11259591 2 318 C:0.801887 CT:0.198113  
chr28 11259596 4 320 C:0.540625 T:0.196875  
CTTTTCTTTTCTTTTCTTTTCTTTCTT:0.2 CTTTCTTTTCTTTTCTTTCTT:  
0.0625  
chr28 11259606 2 318 T:0.801887 TTTC:0.198113  
chr28 11259619 3 316 C:0.718354 CTTTCT:0.193038  
CTTTCTTTTCT:0.0886076  
chr28 11259668 2 304 TTCTC:0.802632 T:0.197368  
chr28 11259670 4 308 C:0.538961 CTCCTT:0.191558  
CTCCTTTTCCTT:0.246753 CTCCTTTCTTTTCCTT:0.0227273  
chr28 11259675 2 304 T:0.802632 TTTC:0.197368  
chr28 11259784 2 288 G:0.5 T:0.5  
chr28 11260071 2 284 G:0.757042 T:0.242958  
chr28 11260086 2 312 T:0.102564 TTTTAGATC:  
0.897436  
chr28 11260125 2 294 C:0.755102 T:0.244898  
chr28 11260401 2 288 CTA:0.881944 C:0.118056

|                   |            |            |                      |                    |
|-------------------|------------|------------|----------------------|--------------------|
| chr28             | 11260415 2 | 278        | CTTT:0.960432        | C:0.0395683        |
| chr28             | 11260667 2 | 300        | G:0.193333           | A:0.806667         |
| chr28             | 11260926 2 | 300        | G:0.996667           | A:0.00333333       |
| chr28             | 11261438 2 | 300        | A:0.77 AC:0.23       |                    |
| chr28             | 11261560 2 | 308        | G:0.746753           | GTT:0.253247       |
| chr28             | 11261562 4 | 308        | A:0.220779           | AT:0.441558        |
| ATT:0.0811688     |            | T:0.256494 |                      |                    |
| chr28             | 11262845 3 | 314        | C:0.328025           | CT:0.582803        |
| CTT:0.089172      |            |            |                      |                    |
| chr28             | 11263466 2 | 308        | G:0.951299           | A:0.0487013        |
| chr28             | 11263663 2 | 300        | A:0.986667           | C:0.0133333        |
| chr28             | 11263809 2 | 306        | C:0.98366            | G:0.0163399        |
| chr28             | 11264751 2 | 302        | C:0.711921           | CTTTTTTTTTTTTTTTT: |
| 0.288079          |            |            |                      |                    |
| chr28             | 11264822 2 | 290        | G:0.158621           | C:0.841379         |
| chr28             | 11265008 2 | 304        | C:0.269737           | T:0.730263         |
| chr28             | 11265410 2 | 300        | C:0.26 T:0.74        |                    |
| chr28             | 11266285 2 | 308        | C:0.0616883          | CA:0.938312        |
| chr28             | 11266576 2 | 304        | TATC:0.907895        | T:0.0921053        |
| chr28             | 11266609 3 | 318        | C:0.855346           | CATT:0.0943396     |
| CATCATT:0.0503145 |            |            |                      |                    |
| chr28             | 11266641 2 | 302        | A:0.880795           | G:0.119205         |
| chr28             | 11266863 2 | 308        | G:0.905844           | A:0.0941558        |
| chr28             | 11267548 2 | 306        | T:0.95098            | C:0.0490196        |
| chr28             | 11269073 2 | 318        | TTAATACCTGA:0.968553 | T:                 |
| 0.0314465         |            |            |                      |                    |
| chr28             | 11269991 2 | 304        | C:0.174342           | T:0.825658         |
| chr28             | 11270027 2 | 304        | C:0.986842           | T:0.0131579        |
| chr28             | 11270760 2 | 304        | G:0.868421           | GAA:0.131579       |
| chr28             | 11270764 3 | 302        | C:0.0165563          | A:0.165563         |
| CA:0.817881       |            |            |                      |                    |
| chr28             | 11271011 2 | 302        | G:0.897351           | A:0.102649         |
| chr28             | 11271584 2 | 304        | G:0.174342           | A:0.825658         |
| chr28             | 11272131 2 | 276        | A:0.057971           | G:0.942029         |
| chr28             | 11272608 2 | 310        | G:0.890323           | A:0.109677         |
| chr28             | 11274137 2 | 268        | GT:0.664179          | G:0.335821         |
| chr28             | 11274150 2 | 290        | T:0.913793           | G:0.0862069        |
| chr28             | 11274151 3 | 296        | T:0.516892           | G:0.415541         |
| TG:0.0675676      |            |            |                      |                    |
| chr28             | 11274749 2 | 304        | A:0.993421           | G:0.00657895       |
| chr28             | 11274914 2 | 302        | T:0.996689           | C:0.00331126       |
| chr28             | 11274951 2 | 306        | C:0.111111           | T:0.888889         |
| chr28             | 11274968 2 | 312        | A:0.0512821          | ATG:0.948718       |
| chr28             | 11275014 2 | 300        | G:0.133333           | A:0.866667         |
| chr28             | 11275204 2 | 304        | A:0.9375 C:0.0625    |                    |
| chr28             | 11275219 2 | 298        | A:0.251678           | G:0.748322         |
| chr28             | 11275614 2 | 302        | T:0.0596026          | C:0.940397         |
| chr28             | 11275639 2 | 298        | G:0.922819           | A:0.0771812        |
| chr28             | 11276077 2 | 294        | C:0.952381           | T:0.047619         |
| chr28             | 11276601 2 | 300        | T:0.92 G:0.08        |                    |
| chr28             | 11276831 2 | 306        | GAAGAAC:0.924837     | G:0.0751634        |
| chr28             | 11276837 2 | 306        | C:0.924837           | CGTT:0.0751634     |
| chr28             | 11277354 2 | 298        | A:0.862416           | C:0.137584         |
| chr28             | 11277635 2 | 290        | A:0.989655           | G:0.0103448        |

|            |          |   |     |                          |                 |
|------------|----------|---|-----|--------------------------|-----------------|
| chr28      | 11277721 | 2 | 308 | C:0.915584               | T:0.0844156     |
| chr28      | 11278420 | 2 | 306 | C:0.843137               | T:0.156863      |
| chr28      | 11278902 | 2 | 296 | G:0.935811               | A:0.0641892     |
| chr28      | 11278938 | 2 | 298 | C:0.92953                | T:0.0704698     |
| chr28      | 11279515 | 2 | 292 | A:0.976027               | C:0.0239726     |
| chr28      | 11279669 | 2 | 286 | T:0.923077               | C:0.0769231     |
| chr28      | 11279683 | 2 | 292 | T:0.931507               | C:0.0684932     |
| chr28      | 11279726 | 2 | 212 | GC:0.226415              | G:0.773585      |
| chr28      | 11279768 | 2 | 306 | T:0.947712               | C:0.0522876     |
| chr28      | 11279772 | 2 | 306 | AC:0.947712              | A:0.0522876     |
| chr28      | 11279774 | 2 | 312 | C:0.163462               | A:0.836538      |
| chr28      | 11279778 | 2 | 306 | C:0.947712               | A:0.0522876     |
| chr28      | 11279779 | 2 | 312 | C:0.163462               | A:0.836538      |
| chr28      | 11279780 | 2 | 306 | AAATT:0.947712           | A:0.0522876     |
| chr28      | 11279784 | 2 | 312 | T:0.163462               | A:0.836538      |
| chr28      | 11279788 | 2 | 306 | CCAAACCAAACCAAT:0.947712 | C:<br>0.0522876 |
| chr28      | 11279789 | 2 | 298 | C:0.0637584              | A:0.936242      |
| chr28      | 11279794 | 2 | 298 | C:0.0637584              | A:0.936242      |
| chr28      | 11279799 | 2 | 292 | C:0.150685               | A:0.849315      |
| chr28      | 11279808 | 2 | 302 | C:0.897351               | T:0.102649      |
| chr28      | 11280003 | 2 | 290 | C:0.944828               | T:0.0551724     |
| chr28      | 11280036 | 2 | 292 | C:0.941781               | T:0.0582192     |
| chr28      | 11280704 | 2 | 302 | GAGAGGA:0.910596         | G:0.089404      |
| chr28      | 11280712 | 2 | 302 | G:0.910596               | T:0.089404      |
| chr28      | 11282085 | 2 | 298 | C:0.92953                | A:0.0704698     |
| chr28      | 11282186 | 2 | 308 | A:0.941558               | T:0.0584416     |
| chr28      | 11282191 | 2 | 308 | A:0.948052               | T:0.0519481     |
| chr28      | 11282475 | 2 | 306 | G:0.908497               | C:0.0915033     |
| chr28      | 11282869 | 2 | 302 | G:0.92053                | A:0.0794702     |
| chr28      | 11283417 | 2 | 306 | CAT:0.915033             | C:0.0849673     |
| chr28      | 11284267 | 2 | 308 | C:0.935065               | T:0.0649351     |
| chr28      | 11284521 | 2 | 310 | T:0.896774               | C:0.103226      |
| chr28      | 11284626 | 2 | 308 | T:0.902597               | C:0.0974026     |
| chr28      | 11284660 | 3 | 294 | TAA:0.251701             | T:0.173469      |
| TA:0.57483 |          |   |     |                          |                 |
| chr28      | 11285707 | 2 | 290 | C:0.937931               | T:0.062069      |
| chr28      | 11286498 | 2 | 294 | T:0.993197               | G:0.00680272    |
| chr28      | 11287034 | 2 | 290 | C:0.851724               | T:0.148276      |
| chr28      | 11287104 | 2 | 296 | A:0.939189               | G:0.0608108     |
| chr28      | 11287174 | 2 | 290 | G:0.937931               | A:0.062069      |
| chr28      | 11287793 | 2 | 254 | C:0.893701               | A:0.106299      |
| chr28      | 11288242 | 2 | 286 | C:0.968531               | A:0.0314685     |
| chr28      | 11289043 | 2 | 302 | A:0                      | G:1             |
| chr28      | 11289271 | 2 | 304 | T:0                      | C:1             |
| chr28      | 11291618 | 2 | 292 | T:0.0821918              | C:0.917808      |
| chr28      | 11291962 | 2 | 310 | A:0                      | G:1             |
| chr28      | 11292808 | 2 | 296 | G:0.986486               | A:0.0135135     |
| chr28      | 11292889 | 2 | 306 | C:0.977124               | T:0.0228758     |
| chr28      | 11294552 | 2 | 298 | CT:0.802013              | C:0.197987      |
| chr28      | 11294976 | 2 | 268 | TA:0.63806               | T:0.36194       |
| chr28      | 11295338 | 2 | 308 | C:0.987013               | T:0.012987      |
| chr28      | 11295532 | 2 | 300 | C:0.93                   | T:0.07          |
| chr28      | 11295568 | 2 | 308 | C:0.198052               | G:0.801948      |

|       |              |                |              |                |
|-------|--------------|----------------|--------------|----------------|
| chr28 | 11295581 4   | 312            | CTT:0.115385 | C:0.570513     |
|       | CT:0.11859   | CTTTT:0.195513 |              |                |
| chr28 | 11295610 2   | 308            | A:0.801948   | G:0.198052     |
| chr28 | 11295881 2   | 304            | G:0.786184   | A:0.213816     |
| chr28 | 11296048 2   | 316            | T:0.775316   | G:0.224684     |
| chr28 | 11296086 3   | 308            | AT:0.74026   | A:0.0584416    |
|       | ATT:0.201299 |                |              |                |
| chr28 | 11296136 2   | 304            | T:0.210526   | C:0.789474     |
| chr28 | 11296485 2   | 312            | T:0.224359   | G:0.775641     |
| chr28 | 11296493 2   | 312            | GA:0.224359  | G:0.775641     |
| chr28 | 11296594 2   | 310            | G:0.816129   | A:0.183871     |
| chr28 | 11296597 2   | 310            | C:0.816129   | T:0.183871     |
| chr28 | 11296669 2   | 316            | T:0.806962   | C:0.193038     |
| chr28 | 11296786 2   | 302            | A:0.215232   | G:0.784768     |
| chr28 | 11296838 2   | 302            | C:0.443709   | T:0.556291     |
| chr28 | 11296852 2   | 302            | G:0.771523   | A:0.228477     |
| chr28 | 11296855 2   | 302            | A:0.771523   | T:0.228477     |
| chr28 | 11297063 2   | 306            | C:0.24183    | A:0.75817      |
| chr28 | 11297074 2   | 308            | T:0          | C:1            |
| chr28 | 11297102 2   | 304            | T:0.230263   | C:0.769737     |
| chr28 | 11297140 2   | 296            | A:0.222973   | C:0.777027     |
| chr28 | 11297177 2   | 306            | C:0.215686   | T:0.784314     |
| chr28 | 11297189 2   | 308            | T:0.178571   | C:0.821429     |
| chr28 | 11297276 2   | 310            | C:0.816129   | G:0.183871     |
| chr28 | 11297294 2   | 310            | A:0.816129   | C:0.183871     |
| chr28 | 11297441 2   | 302            | C:0.0198675  | CAAAT:0.980132 |
| chr28 | 11297774 2   | 304            | GT:0.996711  | G:0.00328947   |
| chr28 | 11297834 2   | 310            | C:0.790323   | T:0.209677     |
| chr28 | 11297841 2   | 310            | T:0          | C:1            |
| chr28 | 11297904 2   | 298            | A:0          | G:1            |
| chr28 | 11297938 2   | 298            | C:0.218121   | T:0.781879     |
| chr28 | 11298093 2   | 308            | C:0.795455   | T:0.204545     |
| chr28 | 11298219 2   | 308            | A:0.792208   | AG:0.207792    |
| chr28 | 11298538 2   | 300            | C:0.783333   | T:0.216667     |
| chr28 | 11299765 2   | 314            | C:0.993631   | G:0.00636943   |
| chr28 | 11299866 2   | 300            | G:0.913333   | A:0.0866667    |
| chr28 | 11300176 2   | 306            | G:0          | A:1            |
| chr28 | 11300427 2   | 310            | A:0          | G:1            |
| chr28 | 11300494 2   | 318            | T:0.00314465 | C:0.996855     |
| chr28 | 11300518 2   | 318            | A:0.00314465 | G:0.996855     |
| chr28 | 11300531 2   | 318            | G:0.00314465 | A:0.996855     |
| chr28 | 11300768 2   | 300            | T:0.0566667  | A:0.943333     |
| chr28 | 11300844 2   | 300            | C:0.00333333 | T:0.996667     |
| chr28 | 11301654 2   | 294            | A:0.972789   | G:0.0272109    |
| chr28 | 11301685 2   | 268            | GT:0.716418  | G:0.283582     |
| chr28 | 11301776 2   | 278            | C:0.151079   | CT:0.848921    |
| chr28 | 11301899 2   | 284            | C:0.0105634  | T:0.989437     |
| chr28 | 11302619 2   | 298            | G:0.0469799  | C:0.95302      |
| chr28 | 11302652 2   | 292            | TGGA:0       | T:1            |
| chr28 | 11302682 2   | 292            | G:0.00684932 | A:0.993151     |
| chr28 | 11303627 2   | 298            | A:0.728188   | G:0.271812     |
| chr28 | 11304834 2   | 302            | A:0          | G:1            |
| chr28 | 11304909 2   | 300            | C:0.983333   | T:0.0166667    |
| chr28 | 11305037 2   | 308            | A:0.00649351 | C:0.993506     |

|                                    |          |   |     |                            |               |
|------------------------------------|----------|---|-----|----------------------------|---------------|
| chr28                              | 11305299 | 2 | 302 | T:0.970199                 | G:0.0298013   |
| chr28                              | 11306387 | 2 | 302 | T:0.970199                 | C:0.0298013   |
| chr28                              | 11306726 | 2 | 296 | C:0.682432                 | CT:0.317568   |
| chr28                              | 11306894 | 2 | 290 | G:0.982759                 | A:0.0172414   |
| chr28                              | 11307128 | 2 | 300 | GT:0.936667                | G:0.0633333   |
| chr28                              | 11309258 | 2 | 302 | C:0.976821                 | T:0.0231788   |
| chr28                              | 11310143 | 2 | 286 | T:0.996503                 | A:0.0034965   |
| chr28                              | 11310285 | 2 | 292 | G:0.90411                  | A:0.0958904   |
| chr28                              | 11311019 | 2 | 304 | A:0.970395                 | G:0.0296053   |
| chr28                              | 11311182 | 2 | 310 | GTTTTT:0.0354839           | G:0.964516    |
| chr28                              | 11311220 | 2 | 278 | T:0.0755396                | C:0.92446     |
| chr28                              | 11312459 | 3 | 288 | TA:0.5625                  | T:0.0833333   |
| TAA:0.354167                       |          |   |     |                            |               |
| chr28                              | 11312919 | 2 | 302 | A:0.0298013                | G:0.970199    |
| chr28                              | 11313232 | 2 | 302 | C:0.950331                 | A:0.0496689   |
| chr28                              | 11313614 | 2 | 312 | T:0.961538                 | C:0.0384615   |
| chr28                              | 11315504 | 2 | 312 | C:0.192308                 | G:0.807692    |
| chr28                              | 11315778 | 2 | 310 | T:0.932258                 | C:0.0677419   |
| chr28                              | 11315830 | 2 | 304 | C:0.976974                 | A:0.0230263   |
| chr28                              | 11315919 | 2 | 296 | CG:0.969595                | C:0.0304054   |
| chr28                              | 11315973 | 2 | 294 | CAG:0.979592               | C:0.0204082   |
| chr28                              | 11316005 | 2 | 292 | C:0.972603                 | T:0.0273973   |
| chr28                              | 11316162 | 2 | 302 | A:0.794702                 | C:0.205298    |
| chr28                              | 11316269 | 2 | 284 | A:0.971831                 | G:0.028169    |
| chr28                              | 11316475 | 2 | 266 | A:0.424812                 | G:0.575188    |
| chr28                              | 11316585 | 2 | 206 | G:0.42233                  | C:0.57767     |
| chr28                              | 11316604 | 2 | 192 | G:0.578125                 | A:0.421875    |
| chr28                              | 11316863 | 2 | 242 | G:0.954545                 | A:0.0454545   |
| chr28                              | 11317055 | 2 | 290 | T:0.762069                 | C:0.237931    |
| chr28                              | 11317197 | 2 | 262 | GGTCC:0.736641             | G:0.263359    |
| chr28                              | 11317201 | 2 | 266 | CG:0.796992                | C:0.203008    |
| chr28                              | 11317203 | 2 | 266 | TCCG:0.796992              | T:0.203008    |
| chr28                              | 11317231 | 3 | 302 | GGTGGGCT:0.854305          | G:            |
| 0.112583 GGTGGGCTGTGGGCT:0.0331126 |          |   |     |                            |               |
| chr28                              | 11317313 | 2 | 306 | A:0.803922                 | G:0.196078    |
| chr28                              | 11317402 | 2 | 296 | T:0.618243                 | A:0.381757    |
| chr28                              | 11317421 | 2 | 300 | T:0.8 A:0.2                |               |
| chr28                              | 11317602 | 2 | 306 | C:0.977124                 | T:0.0228758   |
| chr28                              | 11317604 | 2 | 306 | T:0.996732                 | TC:0.00326797 |
| chr28                              | 11317638 | 2 | 306 | TA:0.830065                | T:0.169935    |
| chr28                              | 11317642 | 2 | 306 | A:0.316993                 | T:0.683007    |
| chr28                              | 11317686 | 2 | 278 | A:0.147482                 | AAG:0.852518  |
| chr28                              | 11318037 | 2 | 272 | A:0.904412                 | G:0.0955882   |
| chr28                              | 11318059 | 2 | 272 | C:0.904412                 | T:0.0955882   |
| chr28                              | 11318401 | 2 | 282 | C:0.815603                 | T:0.184397    |
| chr28                              | 11318755 | 2 | 294 | C:0.945578                 | T:0.0544218   |
| chr28                              | 11318974 | 2 | 204 | C:0.553922                 | CT:0.446078   |
| chr28                              | 11319198 | 2 | 290 | A:0.57931                  | T:0.42069     |
| chr28                              | 11319289 | 2 | 304 | A:0.953947                 | T:0.0460526   |
| chr28                              | 11319292 | 2 | 306 | T:0.960784                 | A:0.0392157   |
| chr28                              | 11319395 | 2 | 274 | A:0.116788                 | G:0.883212    |
| chr28                              | 11319487 | 2 | 306 | C:0.993464                 | G:0.00653595  |
| chr28                              | 11319777 | 2 | 306 | G:0.986928                 | A:0.0130719   |
| chr28                              | 11320022 | 3 | 310 | CTATATATATATATATA:0.203226 |               |

C:0.280645            CTATATATATA:0.516129  
 chr28    11320295 2            296            A:0.996622            AT:0.00337838  
 chr28    11320463 2            304            G:0.996711            A:0.00328947  
 chr28    11320692 2            312            A:0.919872            AT:0.0801282  
 chr28    11321220 3            304            CT:0.733553            C:0.0789474  
 CTT:0.1875  
 chr28    11321302 2            306            T:0.120915            G:0.879085  
 chr28    11321615 2            300            A:0.956667            AT:0.0433333  
 chr28    11321688 2            298            G:0.932886            C:0.0671141  
 chr28    11321848 2            308            G:0.993506            A:0.00649351  
 chr28    11321885 2            308            G:0.925325            A:0.0746753  
 chr28    11321925 2            308            A:0.116883            G:0.883117  
 chr28    11322298 2            306            G:0.424837            A:0.575163  
 chr28    11322475 2            308            T:0.938312            A:0.0616883  
 chr28    11322736 2            304            T:0.993421            G:0.00657895  
 chr28    11323142 2            306            G:0.954248            A:0.0457516  
 chr28    11323350 2            310            G:0.990323            C:0.00967742  
 chr28    11323370 2            300            TGAG:0.933333            T:0.0666667  
 chr28    11324084 2            310            A:0.932258            T:0.0677419  
 chr28    11324431 3            306            GT:0.908497            G:0.0686275  
 GTTTT:0.0228758  
 chr28    11324732 2            304            T:0.993421            C:0.00657895  
 chr28    11325054 2            306            T:0.993464            C:0.00653595  
 chr28    11325291 2            306            C:0.937908            G:0.0620915  
 chr28    11325305 2            308            T:0.931818            G:0.0681818  
 chr28    11325854 2            312            A:0.413462            G:0.586538  
 chr28    11326114 3            320            A:0.48125  
 ACAGACATATCATTTTTTTTTTTTTTTAATTTTTTTTTTTT:0.271875  
 ACAGACATATCATTTTTTTTTTTTTTTAATTTTTTTTTTTT:0.246875  
 chr28    11326177 2            300            A:0.95    T:0.05  
 chr28    11326221 2            298            T:0.993289            G:0.00671141  
 chr28    11326512 2            302            A:0.993377            T:0.00662252  
 chr28    11326707 2            298            C:0.939597            T:0.0604027  
 chr28    11326756 2            300            A:0.993333            C:0.00666667  
 chr28    11326942 2            308            A:0.967532            G:0.0324675  
 chr28    11327080 2            304            G:0.993421            A:0.00657895  
 chr28    11327354 2            302            C:0.119205            G:0.880795  
 chr28    11327564 2            298            T:0.83557            G:0.16443  
 chr28    11327848 2            288            T:0.940972            C:0.0590278  
 chr28    11327995 2            296            T:0.442568            A:0.557432  
 chr28    11328012 2            306            T:0.918301            A:0.0816993  
 chr28    11328494 2            236            A:0.40678            T:0.59322  
 chr28    11328539 2            218            C:0.394495            T:0.605505  
 chr28    11329088 3            298            AT:0.845638            A:0.127517  
 ATT:0.0268456  
 chr28    11329098 2            302            T:0.950331            TC:0.0496689  
 chr28    11329128 2            306            C:0.973856            CACAG:0.0261438  
 chr28    11329135 2            300            A:0.986667            AG:0.0133333  
 chr28    11329136 3            306            A:0.957516            AG:0.0163399  
 G:0.0261438  
 chr28    11329530 2            294            G:0.139456            C:0.860544  
 chr28    11329742 2            300            T:0.94    A:0.06  
 chr28    11329922 2            246            G:0.821138            GT:0.178862  
 chr28    11329945 2            164            G:0.567073            A:0.432927

|       |                   |     |                                  |                 |
|-------|-------------------|-----|----------------------------------|-----------------|
| chr28 | 11329971 2        | 234 | GTGTATATATATATATATATATA:0.961538 |                 |
|       | G:0.0384615       |     |                                  |                 |
| chr28 | 11329973 2        | 286 | GTATATATATA:0.912587             | G:              |
|       | 0.0874126         |     |                                  |                 |
| chr28 | 11330070 2        | 276 | T:0.931159                       | C:0.0688406     |
| chr28 | 11330116 3        | 234 | GTT:0.405983                     | G:0.132479      |
|       | GT:0.461538       |     |                                  |                 |
| chr28 | 11330293 2        | 294 | G:0.401361                       | A:0.598639      |
| chr28 | 11331216 2        | 312 | A:0.977564                       | G:0.0224359     |
| chr28 | 11331797 2        | 304 | T:0.421053                       | G:0.578947      |
| chr28 | 11332333 2        | 312 | A:0.974359                       | G:0.025641      |
| chr28 | 11332587 2        | 312 | A:0.141026                       | AAAAAC:0.858974 |
| chr28 | 11332761 2        | 300 | G:0.976667                       | A:0.0233333     |
| chr28 | 11333661 2        | 312 | G:0.134615                       | GT:0.865385     |
| chr28 | 11333686 2        | 310 | G:0.970968                       | T:0.0290323     |
| chr28 | 11333928 2        | 312 | C:0.371795                       | G:0.628205      |
| chr28 | 11333938 2        | 314 | A:0.136943                       | G:0.863057      |
| chr28 | 11334020 2        | 300 | G:0.99                           | T:0.01          |
| chr28 | 11334067 2        | 304 | C:0.924342                       | A:0.0756579     |
| chr28 | 11334948 2        | 312 | C:0.980769                       | T:0.0192308     |
| chr28 | 11335240 2        | 308 | G:0.99026                        | C:0.00974026    |
| chr28 | 11335262 2        | 308 | A:0.928571                       | T:0.0714286     |
| chr28 | 11335382 2        | 308 | A:0.948052                       | G:0.0519481     |
| chr28 | 11336565 2        | 318 | CT:0.86478                       | C:0.13522       |
| chr28 | 11337174 2        | 310 | C:0.990323                       | T:0.00967742    |
| chr28 | 11337189 2        | 304 | G:0.990132                       | A:0.00986842    |
| chr28 | 11337192 2        | 306 | T:0.111111                       | C:0.888889      |
| chr28 | 11338940 2        | 312 | G:0.996795                       | C:0.00320513    |
| chr28 | 11338972 2        | 318 | T:0.993711                       | C:0.00628931    |
| chr28 | 11338995 2        | 310 | G:0.970968                       | GT:0.0290323    |
| chr28 | 11339013 2        | 314 | T:0.977707                       | A:0.022293      |
| chr28 | 11339016 2        | 302 | G:0.970199                       | GATTT:0.0298013 |
| chr28 | 11339345 2        | 296 | T:0.118243                       | C:0.881757      |
| chr28 | 11339675 2        | 284 | T:0.841549                       | C:0.158451      |
| chr28 | 11340018 2        | 304 | AT:0.921053                      | A:0.0789474     |
| chr28 | 11340028 2        | 308 | T:0.970779                       | A:0.0292208     |
| chr28 | 11340268 2        | 306 | C:0.836601                       | T:0.163399      |
| chr28 | 11340368 2        | 288 | C:0.909722                       | CT:0.0902778    |
| chr28 | 11340584 2        | 308 | A:0.931818                       | G:0.0681818     |
| chr28 | 11340714 2        | 304 | C:0.927632                       | T:0.0723684     |
| chr28 | 11340837 2        | 308 | G:0                              | GT:1            |
| chr28 | 11340842 2        | 308 | G:0                              | GT:1            |
| chr28 | 11341080 2        | 306 | A:0.990196                       | C:0.00980392    |
| chr28 | 11342374 2        | 302 | A:0.60596                        | G:0.39404       |
| chr28 | 11342516 2        | 308 | T:0.977273                       | C:0.0227273     |
| chr28 | 11342528 2        | 310 | C:0.129032                       | CCTCT:0.870968  |
| chr28 | 11342901 2        | 298 | A:0.120805                       | G:0.879195      |
| chr28 | 11342943 2        | 264 | CTTT:0.534091                    | C:0.465909      |
| chr28 | 11343133 2        | 302 | G:0.990066                       | T:0.00993377    |
| chr28 | 11343752 3        | 314 | TTTTG:0.242038                   | T:0.627389      |
|       | TTTTGTTG:0.130573 |     |                                  |                 |
| chr28 | 11343794 2        | 304 | G:0.957237                       | A:0.0427632     |
| chr28 | 11345173 2        | 284 | C:0.876761                       | CT:0.123239     |
| chr28 | 11345441 2        | 310 | G:0.980645                       | A:0.0193548     |

|                              |          |   |     |                     |                  |
|------------------------------|----------|---|-----|---------------------|------------------|
| chr28                        | 11345575 | 2 | 296 | T:0.972973          | A:0.027027       |
| chr28                        | 11345772 | 2 | 312 | A:0.987179          | G:0.0128205      |
| chr28                        | 11346071 | 3 | 294 | AT:0.751701         | A:0.0816327      |
| ATT:0.166667                 |          |   |     |                     |                  |
| chr28                        | 11346075 | 2 | 302 | T:0.953642          | A:0.0463576      |
| chr28                        | 11346082 | 2 | 298 | T:0.97651           | A:0.0234899      |
| chr28                        | 11346252 | 2 | 306 | G:0                 | A:1              |
| chr28                        | 11346276 | 2 | 306 | G:0                 | A:1              |
| chr28                        | 11346283 | 2 | 306 | T:0                 | A:1              |
| chr28                        | 11346284 | 2 | 306 | G:0                 | A:1              |
| chr28                        | 11346293 | 2 | 306 | T:0                 | A:1              |
| chr28                        | 11346369 | 2 | 308 | CA:0                | C:1              |
| chr28                        | 11346741 | 2 | 316 | G:0.981013          | A:0.0189873      |
| chr28                        | 11347334 | 2 | 302 | G:0.97351           | GT:0.0264901     |
| chr28                        | 11347473 | 2 | 308 | G:0.983766          | C:0.0162338      |
| chr28                        | 11347805 | 2 | 306 | G:0.990196          | T:0.00980392     |
| chr28                        | 11348225 | 2 | 302 | GT:0.89404          | G:0.10596        |
| chr28                        | 11348241 | 2 | 306 | G:0.993464          | A:0.00653595     |
| chr28                        | 11348405 | 2 | 302 | T:0.139073          | TTC:0.860927     |
| chr28                        | 11348569 | 2 | 304 | CAG:0.963816        | C:0.0361842      |
| chr28                        | 11349440 | 2 | 312 | A:0.99359           | G:0.00641026     |
| chr28                        | 11349578 | 2 | 308 | G:0.980519          | A:0.0194805      |
| chr28                        | 11350096 | 2 | 306 | T:0.924837          | A:0.0751634      |
| chr28                        | 11350268 | 2 | 308 | T:0.993506          | TTGTG:0.00649351 |
| chr28                        | 11350327 | 2 | 300 | G:0.976667          | GT:0.0233333     |
| chr28                        | 11350916 | 2 | 304 | A:0.414474          | G:0.585526       |
| chr28                        | 11351877 | 2 | 312 | G:0.983974          | C:0.0160256      |
| chr28                        | 11352296 | 2 | 296 | C:0.993243          | T:0.00675676     |
| chr28                        | 11352433 | 4 | 306 | CTT:0.686275        | C:0.0228758      |
| CTTT:0.179739 CTTTT:0.111111 |          |   |     |                     |                  |
| chr28                        | 11353222 | 2 | 300 | T:0.993333          | C:0.00666667     |
| chr28                        | 11353570 | 2 | 306 | T:0.124183          | C:0.875817       |
| chr28                        | 11353951 | 2 | 292 | A:0.941781          | AG:0.0582192     |
| chr28                        | 11353954 | 3 | 292 | G:0.215753          | GT:0.760274      |
| GTT:0.0239726                |          |   |     |                     |                  |
| chr28                        | 11354007 | 3 | 240 | TGTGTGGGGGGG:0.7375 | T:               |
| 0.0333333 TGG:0.229167       |          |   |     |                     |                  |
| chr28                        | 11354009 | 2 | 252 | TGTGGGGGGG:0.809524 | T:               |
| 0.190476                     |          |   |     |                     |                  |
| chr28                        | 11354011 | 2 | 268 | TGGGGGGG:0.779851   | T:               |
| 0.220149                     |          |   |     |                     |                  |
| chr28                        | 11354189 | 2 | 296 | T:0.969595          | C:0.0304054      |
| chr28                        | 11355172 | 2 | 310 | C:0.948387          | A:0.0516129      |
| chr28                        | 11355407 | 3 | 310 | CT:0.254839         | C:0.590323       |
| CTT:0.154839                 |          |   |     |                     |                  |
| chr28                        | 11356045 | 2 | 308 | G:0.983766          | A:0.0162338      |
| chr28                        | 11356881 | 3 | 304 | GAA:0.233553        | G:0.128289       |
| GA:0.638158                  |          |   |     |                     |                  |
| chr28                        | 11358289 | 3 | 292 | TA:0.308219         | T:0.613014       |
| TAA:0.0787671                |          |   |     |                     |                  |
| chr28                        | 11358300 | 2 | 308 | A:0.993506          | C:0.00649351     |
| chr28                        | 11358751 | 2 | 306 | T:0.816993          | A:0.183007       |
| chr28                        | 11358783 | 2 | 312 | T:0.88141           | C:0.11859        |
| chr28                        | 11358785 | 2 | 312 | C:0.99359           | T:0.00641026     |



|               |          |   |     |                |              |
|---------------|----------|---|-----|----------------|--------------|
| chr28         | 11358995 | 2 | 314 | A:0.996815     | T:0.00318471 |
| chr28         | 11359571 | 2 | 316 | T:0.924051     | A:0.0759494  |
| chr28         | 11359911 | 3 | 292 | CT:0.640411    | C:0.273973   |
| CTT:0.0856164 |          |   |     |                |              |
| chr28         | 11360031 | 2 | 300 | A:0.966667     | G:0.0333333  |
| chr28         | 11360684 | 2 | 302 | C:0.00331126   | T:0.996689   |
| chr28         | 11360703 | 2 | 306 | TTGAC:0.977124 | T:0.0228758  |
| chr28         | 11360990 | 2 | 308 | G:0.99026      | C:0.00974026 |
| chr28         | 11361323 | 2 | 306 | C:0.98366      | T:0.0163399  |
| chr28         | 11361862 | 2 | 306 | A:0.986928     | T:0.0130719  |
| chr28         | 11361867 | 2 | 310 | A:0.996774     | G:0.00322581 |
| chr28         | 11362406 | 2 | 302 | A:0.983444     | G:0.0165563  |
| chr28         | 11362523 | 2 | 304 | A:0.983553     | G:0.0164474  |
| chr28         | 11362701 | 2 | 312 | T:0.977564     | C:0.0224359  |
| chr28         | 11362897 | 2 | 310 | A:0.416129     | G:0.583871   |
| chr28         | 11362904 | 2 | 310 | CAT:0.980645   | C:0.0193548  |
| chr28         | 11363289 | 2 | 308 | T:0.974026     | C:0.025974   |
| chr28         | 11363460 | 2 | 300 | CT:0.826667    | C:0.173333   |
| chr28         | 11363642 | 2 | 308 | T:0.146104     | C:0.853896   |
| chr28         | 11363936 | 2 | 306 | A:0.95098      | C:0.0490196  |
| chr28         | 11363960 | 2 | 302 | G:0.983444     | A:0.0165563  |
| chr28         | 11364022 | 2 | 310 | T:0.993548     | C:0.00645161 |
| chr28         | 11364054 | 2 | 312 | TAAA:0.99359   | T:0.00641026 |
| chr28         | 11364938 | 2 | 302 | C:0.996689     | T:0.00331126 |
| chr28         | 11365347 | 2 | 314 | T:0.977707     | C:0.022293   |
| chr28         | 11366535 | 2 | 316 | A:0.825949     | T:0.174051   |
| chr28         | 11367224 | 2 | 298 | A:0.993289     | G:0.00671141 |
| chr28         | 11367266 | 2 | 312 | G:0.99359      | A:0.00641026 |
| chr28         | 11367613 | 2 | 306 | G:0.140523     | A:0.859477   |
| chr28         | 11368188 | 2 | 306 | G:0.98366      | C:0.0163399  |
| chr28         | 11368883 | 2 | 308 | G:0.983766     | A:0.0162338  |
| chr28         | 11368930 | 2 | 312 | G:0.977564     | A:0.0224359  |
| chr28         | 11369634 | 2 | 308 | C:0.983766     | T:0.0162338  |
| chr28         | 11369698 | 2 | 312 | A:0.942308     | G:0.0576923  |
| chr28         | 11369707 | 2 | 314 | C:0.990446     | T:0.00955414 |
| chr28         | 11369865 | 2 | 308 | C:0.993506     | A:0.00649351 |
| chr28         | 11369931 | 2 | 300 | T:0.133333     | TAC:0.866667 |
| chr28         | 11370083 | 2 | 314 | G:0.426752     | T:0.573248   |
| chr28         | 11370174 | 2 | 290 | C:0.417241     | T:0.582759   |
| chr28         | 11370406 | 2 | 288 | G:0.986111     | C:0.0138889  |
| chr28         | 11370827 | 2 | 298 | TTC:0.778523   | T:0.221477   |
| chr28         | 11370879 | 3 | 280 | CA:0.310714    | C:0.203571   |
| CAA:0.485714  |          |   |     |                |              |
| chr28         | 11371043 | 2 | 304 | T:0.825658     | A:0.174342   |
| chr28         | 11372112 | 2 | 310 | T:0.996774     | A:0.00322581 |
| chr28         | 11372115 | 2 | 310 | A:0.983871     | AT:0.016129  |
| chr28         | 11372357 | 2 | 310 | G:0.983871     | A:0.016129   |
| chr28         | 11372999 | 2 | 304 | G:0.976974     | A:0.0230263  |
| chr28         | 11373109 | 2 | 296 | A:0.993243     | G:0.00675676 |
| chr28         | 11373317 | 2 | 290 | A:0.82069      | AT:0.17931   |
| chr28         | 11373539 | 2 | 300 | G:0.99         | A:0.01       |
| chr28         | 11373568 | 2 | 308 | G:0.993506     | A:0.00649351 |
| chr28         | 11374137 | 2 | 302 | C:0.817881     | T:0.182119   |
| chr28         | 11374318 | 2 | 304 | G:0.983553     | A:0.0164474  |

|                                                                                            |            |     |                           |              |
|--------------------------------------------------------------------------------------------|------------|-----|---------------------------|--------------|
| chr28                                                                                      | 11375016 2 | 314 | T:0.111465                | A:0.888535   |
| chr28                                                                                      | 11375064 2 | 306 | T:0.993464                | C:0.00653595 |
| chr28                                                                                      | 11375204 2 | 306 | C:0.781046                | CT:0.218954  |
| chr28                                                                                      | 11375257 2 | 310 | CAG:0.945161              | C:0.0548387  |
| chr28                                                                                      | 11376138 2 | 300 | G:0.993333                | A:0.00666667 |
| chr28                                                                                      | 11376448 2 | 298 | A:0.979866                | T:0.0201342  |
| chr28                                                                                      | 11376449 2 | 294 | C:0.785714                | T:0.214286   |
| chr28                                                                                      | 11376645 2 | 310 | C:0.990323                | T:0.00967742 |
| chr28                                                                                      | 11377176 2 | 304 | C:0.138158                | T:0.861842   |
| chr28                                                                                      | 11377785 2 | 302 | GA:0.986755               | G:0.013245   |
| chr28                                                                                      | 11377847 2 | 300 | T:0.146667                | C:0.853333   |
| chr28                                                                                      | 11377911 2 | 310 | G:0.980645                | A:0.0193548  |
| chr28                                                                                      | 11377940 2 | 310 | GAT:0.980645              | G:0.0193548  |
| chr28                                                                                      | 11378893 2 | 248 | GT:0.354839               | G:0.645161   |
| chr28                                                                                      | 11379024 2 | 304 | C:0.861842                | T:0.138158   |
| chr28                                                                                      | 11380042 3 | 320 | G:0.85                    |              |
| GCCAAATAGTCTTTTTATTTTTTTTTTTTTTTTTTTTTTTTTTTTTTTTTTTTTTTTTTTTTTTTTTTTTTTTTTTTTTTT:0.109375 |            |     |                           |              |
| GCCAAATAGTCTTTTTATTTTTTTTTTTTTTTTTTTTTTTTTTTTTTTTTTTTTTTTTTTTTTTTTTTTTTTTTTTTTTTT:0.040625 |            |     |                           |              |
| chr28                                                                                      | 11380061 2 | 310 | C:0.996774                | T:0.00322581 |
| chr28                                                                                      | 11380180 2 | 306 | C:0.816993                | CT:0.183007  |
| chr28                                                                                      | 11380262 2 | 304 | A:0.578947                | G:0.421053   |
| chr28                                                                                      | 11380346 2 | 304 | TAA:0.819079              | T:0.180921   |
| chr28                                                                                      | 11380606 2 | 316 | G:0.987342                | GTTTAGTAACA: |
| 0.0126582                                                                                  |            |     |                           |              |
| chr28                                                                                      | 11380786 2 | 290 | TG:0.962069               | T:0.037931   |
| chr28                                                                                      | 11381145 3 | 290 | A:0.189655                | ATT:0.293103 |
| ATTAT:0.517241                                                                             |            |     |                           |              |
| chr28                                                                                      | 11381146 2 | 290 | A:0.965517                | T:0.0344828  |
| chr28                                                                                      | 11381457 3 | 310 | CTTAT:0.758065            | C:0.177419   |
| CTTATTTAT:0.0645161                                                                        |            |     |                           |              |
| chr28                                                                                      | 11381771 2 | 312 | C:0.115385                | T:0.884615   |
| chr28                                                                                      | 11381789 2 | 296 | G:0.993243                | A:0.00675676 |
| chr28                                                                                      | 11381828 2 | 304 | C:0.980263                | A:0.0197368  |
| chr28                                                                                      | 11382448 2 | 308 | G:0.980519                | A:0.0194805  |
| chr28                                                                                      | 11382674 2 | 304 | C:0.148026                | T:0.851974   |
| chr28                                                                                      | 11382703 2 | 304 | G:0.980263                | A:0.0197368  |
| chr28                                                                                      | 11382784 2 | 288 | C:0.788194                | CT:0.211806  |
| chr28                                                                                      | 11382796 2 | 292 | C:0.756849                | CT:0.243151  |
| chr28                                                                                      | 11382890 2 | 292 | A:0.993151                | G:0.00684932 |
| chr28                                                                                      | 11382915 2 | 292 | CG:0.424658               | C:0.575342   |
| chr28                                                                                      | 11382929 2 | 294 | C:0.578231                | T:0.421769   |
| chr28                                                                                      | 11383210 2 | 294 | C:0.979592                | T:0.0204082  |
| chr28                                                                                      | 11384031 2 | 292 | C:0.979452                | A:0.0205479  |
| chr28                                                                                      | 11384336 2 | 294 | T:0.982993                | C:0.0170068  |
| chr28                                                                                      | 11384435 3 | 312 | GTTTTTTTTTTTTTTT:0.612179 | G:           |
| 0.176282 GTT:0.211538                                                                      |            |     |                           |              |
| chr28                                                                                      | 11384574 2 | 298 | G:0.979866                | A:0.0201342  |
| chr28                                                                                      | 11384657 2 | 290 | C:0.989655                | A:0.0103448  |
| chr28                                                                                      | 11385087 2 | 306 | C:0.137255                | T:0.862745   |
| chr28                                                                                      | 11385266 2 | 312 | C:0.99359                 | T:0.00641026 |
| chr28                                                                                      | 11385325 2 | 310 | G:0.980645                | A:0.0193548  |
| chr28                                                                                      | 11385610 2 | 302 | C:0.145695                | T:0.854305   |
| chr28                                                                                      | 11385832 2 | 296 | CA:0.135135               | C:0.864865   |
| chr28                                                                                      | 11385878 2 | 308 | G:0.996753                | A:0.00324675 |

|                                 |          |   |     |                      |                |
|---------------------------------|----------|---|-----|----------------------|----------------|
| chr28                           | 11386115 | 2 | 296 | C:0.989865           | T:0.0101351    |
| chr28                           | 11386490 | 2 | 298 | T:0.422819           | A:0.577181     |
| chr28                           | 11386521 | 2 | 308 | T:0.993506           | G:0.00649351   |
| chr28                           | 11386861 | 3 | 292 | TAA:0.400685         | T:0.14726      |
| TA:0.452055                     |          |   |     |                      |                |
| chr28                           | 11387684 | 2 | 306 | T:0.970588           | G:0.0294118    |
| chr28                           | 11387819 | 2 | 312 | ATGATTTTAAT:0.948718 | A:             |
| 0.0512821                       |          |   |     |                      |                |
| chr28                           | 11388558 | 2 | 276 | TA:0.710145          | T:0.289855     |
| chr28                           | 11388762 | 2 | 300 | G:0.403333           | A:0.596667     |
| chr28                           | 11388982 | 2 | 302 | A:0.94702            | G:0.0529801    |
| chr28                           | 11389436 | 2 | 300 | C:0.993333           | CT:0.00666667  |
| chr28                           | 11389806 | 2 | 310 | C:0.954839           | T:0.0451613    |
| chr28                           | 11390211 | 2 | 304 | G:0.963816           | A:0.0361842    |
| chr28                           | 11390298 | 2 | 304 | G:0.128289           | A:0.871711     |
| chr28                           | 11390661 | 2 | 312 | CTT:0.400641         | C:0.599359     |
| chr28                           | 11390684 | 2 | 312 | C:0.996795           | A:0.00320513   |
| chr28                           | 11391337 | 2 | 302 | G:0.993377           | A:0.00662252   |
| chr28                           | 11392149 | 2 | 308 | G:0.996753           | A:0.00324675   |
| chr28                           | 11392155 | 2 | 308 | C:0.996753           | T:0.00324675   |
| chr28                           | 11392243 | 2 | 314 | GTGAAAT:0.980892     | G:0.0191083    |
| chr28                           | 11392462 | 2 | 312 | GAC:0.977564         | G:0.0224359    |
| chr28                           | 11393180 | 2 | 296 | G:0.25               | GT:0.75        |
| chr28                           | 11393771 | 2 | 308 | G:0.87987            |                |
| GAGAGAGAGAGAGAGAGAGAGAA:0.12013 |          |   |     |                      |                |
| chr28                           | 11393782 | 2 | 246 | A:0.609756           | AG:0.390244    |
| chr28                           | 11393783 | 3 | 308 | A:0.548701           | AG:0.318182    |
| AGAGAGAGAAAAGAG:0.133117        |          |   |     |                      |                |
| chr28                           | 11393791 | 2 | 276 | A:0.876812           | AAGAG:0.123188 |
| chr28                           | 11393795 | 2 | 288 | GAGAA:0.725694       | G:0.274306     |
| chr28                           | 11393845 | 2 | 310 | G:0.790323           | GAA:0.209677   |
| chr28                           | 11393846 | 2 | 298 | AG:0.305369          | A:0.694631     |
| chr28                           | 11393849 | 2 | 306 | A:0.95098            | AAG:0.0490196  |
| chr28                           | 11393850 | 3 | 312 | A:0.266026           | G:0.673077     |
| AG:0.0608974                    |          |   |     |                      |                |
| chr28                           | 11393870 | 2 | 312 | GA:0.939103          | G:0.0608974    |
| chr28                           | 11393942 | 2 | 270 | T:0.766667           | TTA:0.233333   |
| chr28                           | 11393957 | 2 | 300 | TA:0.936667          | T:0.0633333    |
| chr28                           | 11393959 | 2 | 312 | T:0.913462           | TATA:0.0865385 |
| chr28                           | 11394662 | 2 | 298 | G:0.986577           | A:0.0134228    |
| chr28                           | 11395143 | 2 | 304 | A:0.993421           | T:0.00657895   |
| chr28                           | 11395453 | 2 | 308 | C:0.993506           | T:0.00649351   |
| chr28                           | 11395604 | 3 | 290 | CTT:0.765517         | C:0.0586207    |
| TTT:0.175862                    |          |   |     |                      |                |
| chr28                           | 11395984 | 2 | 290 | C:0.996552           | T:0.00344828   |
| chr28                           | 11396231 | 2 | 308 | G:0.116883           | T:0.883117     |
| chr28                           | 11396469 | 2 | 300 | C:0.403333           | T:0.596667     |
| chr28                           | 11396726 | 2 | 312 | T:0.99359            | C:0.00641026   |
| chr28                           | 11396729 | 2 | 312 | A:0.99359            | G:0.00641026   |
| chr28                           | 11396817 | 2 | 298 | C:0.993289           | T:0.00671141   |
| chr28                           | 11396858 | 2 | 304 | C:0.993421           | A:0.00657895   |
| chr28                           | 11397076 | 2 | 308 | G:0.987013           | A:0.012987     |
| chr28                           | 11397620 | 2 | 298 | GTT:0.147651         | G:0.852349     |
| chr28                           | 11397684 | 2 | 300 | AAGAG:0.4            | A:0.6          |

|                                   |          |   |     |                      |              |
|-----------------------------------|----------|---|-----|----------------------|--------------|
| chr28                             | 11397748 | 2 | 284 | A:0.126761           | G:0.873239   |
| chr28                             | 11397771 | 2 | 288 | C:0.930556           | T:0.0694444  |
| chr28                             | 11398479 | 2 | 302 | T:0.384106           | C:0.615894   |
| chr28                             | 11398842 | 2 | 294 | G:0.97619            | A:0.0238095  |
| chr28                             | 11399261 | 2 | 298 | T:0.989933           | C:0.0100671  |
| chr28                             | 11399472 | 2 | 292 | C:0.989726           | T:0.010274   |
| chr28                             | 11400792 | 2 | 296 | A:0.141892           | T:0.858108   |
| chr28                             | 11401721 | 2 | 314 | G:0.410828           | A:0.589172   |
| chr28                             | 11401844 | 2 | 306 | G:0.973856           | A:0.0261438  |
| chr28                             | 11401962 | 2 | 308 | G:0.980519           | A:0.0194805  |
| chr28                             | 11402177 | 2 | 306 | C:0.784314           | A:0.215686   |
| chr28                             | 11402263 | 2 | 300 | C:0.993333           | T:0.00666667 |
| chr28                             | 11402468 | 2 | 298 | G:0.966443           | T:0.033557   |
| chr28                             | 11402469 | 2 | 298 | A:0.966443           | T:0.033557   |
| chr28                             | 11402596 | 2 | 286 | T:0.972028           | C:0.027972   |
| chr28                             | 11402600 | 3 | 316 | CCTCTCTCTCT:0.322785 | C:           |
| 0.303797 CCTCTCTCTCTCTCT:0.373418 |          |   |     |                      |              |
| chr28                             | 11402645 | 2 | 242 | TA:0.475207          | T:0.524793   |
| chr28                             | 11402796 | 2 | 300 | C:0.843333           | T:0.156667   |
| chr28                             | 11403468 | 2 | 306 | C:0.820261           | T:0.179739   |
| chr28                             | 11403533 | 2 | 312 | A:0.99359            | G:0.00641026 |
| chr28                             | 11403536 | 2 | 310 | T:0.819355           | C:0.180645   |
| chr28                             | 11404631 | 2 | 288 | T:0.142361           | C:0.857639   |
| chr28                             | 11404670 | 2 | 308 | A:0.831169           | C:0.168831   |
| chr28                             | 11404882 | 2 | 298 | G:0.114094           | C:0.885906   |
| chr28                             | 11406064 | 2 | 298 | C:0.83557            | T:0.16443    |
| chr28                             | 11406676 | 2 | 294 | T:0.959184           | C:0.0408163  |
| chr28                             | 11406697 | 2 | 300 | T:0.396667           | A:0.603333   |
| chr28                             | 11406738 | 2 | 292 | AT:0.157534          | A:0.842466   |
| chr28                             | 11406755 | 2 | 300 | G:0.41 A:0.59        |              |
| chr28                             | 11406933 | 2 | 280 | G:0.964286           | A:0.0357143  |
| chr28                             | 11406993 | 2 | 296 | T:0.152027           | C:0.847973   |
| chr28                             | 11407521 | 2 | 294 | G:0.146259           | GT:0.853741  |
| chr28                             | 11407834 | 2 | 290 | G:0.993103           | A:0.00689655 |
| chr28                             | 11409745 | 2 | 294 | T:0.302721           | C:0.697279   |
| chr28                             | 11410506 | 2 | 284 | T:0.954225           | C:0.0457746  |
| chr28                             | 11410817 | 2 | 290 | G:0.955172           | C:0.0448276  |
| chr28                             | 11410823 | 2 | 292 | AT:0.277397          | A:0.722603   |
| chr28                             | 11411325 | 2 | 280 | G:0.864286           | A:0.135714   |
| chr28                             | 11411580 | 2 | 300 | C:0.486667           | A:0.513333   |
| chr28                             | 11411684 | 2 | 290 | G:0.351724           | A:0.648276   |
| chr28                             | 11411741 | 2 | 298 | T:0.298658           | C:0.701342   |
| chr28                             | 11411795 | 2 | 292 | A:0.989726           | G:0.010274   |
| chr28                             | 11411861 | 2 | 294 | T:0.357143           | C:0.642857   |
| chr28                             | 11411938 | 2 | 306 | C:0.866013           | T:0.133987   |
| chr28                             | 11411995 | 2 | 304 | CCA:0.332237         | C:0.667763   |
| chr28                             | 11412144 | 2 | 296 | A:0.344595           | C:0.655405   |
| chr28                             | 11412181 | 2 | 308 | T:0.344156           | G:0.655844   |
| chr28                             | 11412203 | 2 | 308 | C:0.344156           | T:0.655844   |
| chr28                             | 11412265 | 2 | 312 | T:0.987179           | C:0.0128205  |
| chr28                             | 11412370 | 2 | 304 | C:0.519737           | T:0.480263   |
| chr28                             | 11412429 | 2 | 294 | G:0.97619            | A:0.0238095  |
| chr28                             | 11412463 | 2 | 296 | A:0.131757           | G:0.868243   |
| chr28                             | 11412904 | 2 | 298 | C:0.52349            | T:0.47651    |

|       |          |   |     |                  |                |
|-------|----------|---|-----|------------------|----------------|
| chr28 | 11412963 | 2 | 292 | A:0.315068       | C:0.684932     |
| chr28 | 11413178 | 2 | 296 | A:0.331081       | G:0.668919     |
| chr28 | 11413588 | 2 | 294 | T:0.343537       | C:0.656463     |
| chr28 | 11413779 | 2 | 296 | G:0.327703       | C:0.672297     |
| chr28 | 11415240 | 2 | 298 | C:0.872483       | T:0.127517     |
| chr28 | 11415441 | 2 | 296 | G:0.949324       | GC:0.0506757   |
| chr28 | 11415479 | 2 | 302 | G:0.990066       | A:0.00993377   |
| chr28 | 11415635 | 2 | 294 | C:0.989796       | A:0.0102041    |
| chr28 | 11415710 | 2 | 298 | C:0.295302       | T:0.704698     |
| chr28 | 11416137 | 2 | 306 | T:0.30719        | G:0.69281      |
| chr28 | 11416184 | 2 | 302 | C:0.927152       | T:0.0728477    |
| chr28 | 11416385 | 2 | 300 | C:0.306667       | T:0.693333     |
| chr28 | 11416393 | 2 | 300 | A:0.306667       | G:0.693333     |
| chr28 | 11416421 | 2 | 300 | C:0.306667       | T:0.693333     |
| chr28 | 11416931 | 2 | 298 | G:0.862416       | A:0.137584     |
| chr28 | 11417125 | 2 | 294 | C:0.309524       | A:0.690476     |
| chr28 | 11417144 | 2 | 296 | C:0.317568       | G:0.682432     |
| chr28 | 11417358 | 2 | 294 | G:0.319728       | A:0.680272     |
| chr28 | 11417380 | 2 | 298 | T:0.305369       | C:0.694631     |
| chr28 | 11417401 | 2 | 294 | G:0.319728       | T:0.680272     |
| chr28 | 11417573 | 2 | 292 | C:0.934932       | T:0.0650685    |
| chr28 | 11417577 | 2 | 292 | A:0.308219       | G:0.691781     |
| chr28 | 11417769 | 2 | 302 | C:0.976821       | T:0.0231788    |
| chr28 | 11418418 | 2 | 302 | C:0.937086       | CTTA:0.0629139 |
| chr28 | 11418658 | 2 | 304 | G:0.973684       | A:0.0263158    |
| chr28 | 11418862 | 2 | 262 | C:0.305344       | T:0.694656     |
| chr28 | 11419163 | 2 | 218 | G:0.261468       | A:0.738532     |
| chr28 | 11419363 | 2 | 178 | A:0.578652       | T:0.421348     |
| chr28 | 11420115 | 2 | 218 | C:0.155963       | G:0.844037     |
| chr28 | 11420140 | 2 | 222 | G:0.761261       | A:0.238739     |
| chr28 | 11420191 | 2 | 190 | A:0.431579       | T:0.568421     |
| chr28 | 11420278 | 2 | 198 | G:0.843434       | A:0.156566     |
| chr28 | 11420342 | 2 | 200 | G:0.905 GC:0.095 |                |
| chr28 | 11420347 | 2 | 200 | G:0.25 GC:0.75   |                |
| chr28 | 11420354 | 2 | 200 | C:0.25 T:0.75    |                |
| chr28 | 11420399 | 2 | 208 | AC:0.153846      | A:0.846154     |
| chr28 | 11420410 | 2 | 208 | C:0.153846       | T:0.846154     |
| chr28 | 11420543 | 2 | 220 | C:0.154545       | G:0.845455     |
| chr28 | 11420689 | 2 | 244 | T:0.840164       | A:0.159836     |
| chr28 | 11421086 | 2 | 252 | C:0.845238       | T:0.154762     |
| chr28 | 11421306 | 2 | 262 | C:0.133588       | G:0.866412     |
| chr28 | 11421383 | 2 | 290 | C:0.365517       | T:0.634483     |
| chr28 | 11421567 | 2 | 296 | T:0.476351       | C:0.523649     |
| chr28 | 11421735 | 2 | 296 | C:0.138514       | A:0.861486     |
| chr28 | 11421942 | 2 | 306 | T:0.143791       | C:0.856209     |
| chr28 | 11422206 | 2 | 296 | G:0.111486       | A:0.888514     |
| chr28 | 11422385 | 2 | 298 | CT:0.97651       | C:0.0234899    |
| chr28 | 11422386 | 2 | 298 | T:0.187919       | C:0.812081     |
| chr28 | 11422387 | 2 | 298 | G:0.97651        | C:0.0234899    |
| chr28 | 11422461 | 2 | 290 | G:0.486207       | A:0.513793     |
| chr28 | 11422483 | 2 | 292 | G:0.688356       | A:0.311644     |
| chr28 | 11422662 | 2 | 302 | G:0.966887       | C:0.0331126    |
| chr28 | 11422677 | 2 | 300 | C:0.79 T:0.21    |                |
| chr28 | 11422834 | 2 | 304 | C:0.970395       | G:0.0296053    |

|          |                |   |     |                   |                 |
|----------|----------------|---|-----|-------------------|-----------------|
| chr28    | 11423120       | 2 | 288 | G:0.145833        | A:0.854167      |
| chr28    | 11423200       | 2 | 286 | G:0.496503        | A:0.503497      |
| chr28    | 11423349       | 2 | 288 | G:0.489583        | A:0.510417      |
| chr28    | 11423590       | 2 | 298 | G:0.147651        | A:0.852349      |
| chr28    | 11424170       | 2 | 300 | C:0.136667        | CT:0.863333     |
| chr28    | 11424205       | 2 | 294 | C:0.863946        | T:0.136054      |
| chr28    | 11424287       | 2 | 284 | T:0.978873        | TG:0.0211268    |
| chr28    | 11424305       | 2 | 280 | C:0.489286        | T:0.510714      |
| chr28    | 11424429       | 3 | 282 | ATTTTTTT:0.684397 | A:              |
| 0.156028 | ATTTT:0.159574 |   |     |                   |                 |
| chr28    | 11424609       | 2 | 274 | C:0.879562        | G:0.120438      |
| chr28    | 11424683       | 2 | 262 | T:0.866412        | TTGAAC:0.133588 |
| chr28    | 11424708       | 2 | 266 | C:0.894737        | T:0.105263      |
| chr28    | 11424721       | 2 | 274 | T:0.489051        | C:0.510949      |
| chr28    | 11424818       | 2 | 258 | C:0.786822        | T:0.213178      |
| chr28    | 11424884       | 2 | 228 | C:0.868421        | T:0.131579      |
| chr28    | 11425255       | 2 | 298 | C:0.879195        | T:0.120805      |
| chr28    | 11425269       | 2 | 296 | T:0.297297        | C:0.702703      |
| chr28    | 11425339       | 2 | 310 | G:0.880645        | C:0.119355      |
| chr28    | 11425346       | 2 | 308 | G:0.866883        | A:0.133117      |
| chr28    | 11425922       | 2 | 298 | G:0.879195        | T:0.120805      |
| chr28    | 11425958       | 2 | 296 | A:0.888514        | C:0.111486      |
| chr28    | 11426016       | 2 | 292 | A:0.863014        | AT:0.136986     |
| chr28    | 11426159       | 2 | 310 | A:0.880645        | G:0.119355      |
| chr28    | 11426266       | 2 | 300 | G:0.763333        | A:0.236667      |
| chr28    | 11426282       | 2 | 304 | T:0.898026        | C:0.101974      |
| chr28    | 11426438       | 2 | 288 | T:0.881944        | A:0.118056      |
| chr28    | 11426621       | 2 | 302 | A:0.728477        | G:0.271523      |
| chr28    | 11426737       | 2 | 302 | A:0.89404         | C:0.10596       |
| chr28    | 11426791       | 2 | 296 | T:0.888514        | C:0.111486      |
| chr28    | 11427406       | 2 | 310 | A:0.816129        | C:0.183871      |
| chr28    | 11427446       | 2 | 304 | G:0.805921        | A:0.194079      |
| chr28    | 11427512       | 2 | 304 | T:0.993421        | G:0.00657895    |
| chr28    | 11427715       | 2 | 298 | C:0.986577        | T:0.0134228     |
| chr28    | 11427820       | 2 | 310 | G:0.864516        | T:0.135484      |
| chr28    | 11427838       | 2 | 306 | T:0.869281        | C:0.130719      |
| chr28    | 11427908       | 2 | 294 | C:0.935374        | A:0.0646259     |
| chr28    | 11428001       | 2 | 292 | G:0.890411        | C:0.109589      |
| chr28    | 11428014       | 2 | 298 | C:0.889262        | T:0.110738      |
| chr28    | 11428071       | 2 | 300 | T:0.81 C:0.19     |                 |
| chr28    | 11428105       | 2 | 296 | T:0.881757        | G:0.118243      |
| chr28    | 11428263       | 2 | 294 | A:0.880952        | G:0.119048      |
| chr28    | 11428386       | 2 | 308 | A:0.925325        | G:0.0746753     |
| chr28    | 11428887       | 2 | 310 | T:0.974194        | C:0.0258065     |
| chr28    | 11428889       | 2 | 310 | A:0.887097        | G:0.112903      |
| chr28    | 11428965       | 2 | 310 | A:0.770968        | C:0.229032      |
| chr28    | 11429020       | 2 | 308 | A:0.987013        | G:0.012987      |
| chr28    | 11429207       | 2 | 310 | GTT:0.974194      | G:0.0258065     |
| chr28    | 11429220       | 2 | 312 | C:0.894231        | T:0.105769      |
| chr28    | 11429733       | 2 | 298 | A:0.379195        | T:0.620805      |
| chr28    | 11429844       | 2 | 300 | G:0.896667        | A:0.103333      |
| chr28    | 11429874       | 2 | 300 | A:0.766667        | G:0.233333      |
| chr28    | 11429887       | 2 | 300 | C:0.886667        | CTT:0.113333    |
| chr28    | 11430082       | 2 | 298 | A:0.744966        | T:0.255034      |

|                |                  |   |     |                    |                  |
|----------------|------------------|---|-----|--------------------|------------------|
| chr28          | 11430108         | 2 | 302 | C:0.738411         | T:0.261589       |
| chr28          | 11430770         | 2 | 304 | A:0.960526         | C:0.0394737      |
| chr28          | 11431115         | 2 | 312 | T:0.891026         | C:0.108974       |
| chr28          | 11431529         | 2 | 304 | G:0.858553         | C:0.141447       |
| chr28          | 11431632         | 2 | 304 | A:0.901316         | G:0.0986842      |
| chr28          | 11431899         | 2 | 310 | G:0.919355         | A:0.0806452      |
| chr28          | 11432698         | 2 | 300 | T:0.973333         | A:0.0266667      |
| chr28          | 11432793         | 2 | 302 | C:0.370861         | T:0.629139       |
| chr28          | 11432958         | 2 | 298 | TA:0.932886        | T:0.0671141      |
| chr28          | 11433004         | 2 | 306 | C:0.872549         | T:0.127451       |
| chr28          | 11433034         | 2 | 304 | C:0.996711         | G:0.00328947     |
| chr28          | 11433414         | 2 | 312 | T:0.894231         | TAAACAA:0.105769 |
| chr28          | 11434096         | 2 | 294 | CTTTT:0.85034      | C:0.14966        |
| chr28          | 11434131         | 2 | 294 | T:0.853741         | C:0.146259       |
| chr28          | 11434149         | 2 | 292 | G:0.863014         | A:0.136986       |
| chr28          | 11434291         | 2 | 300 | A:0.87 C:0.13      |                  |
| chr28          | 11434368         | 2 | 306 | G:0.398693         | A:0.601307       |
| chr28          | 11434415         | 2 | 304 | G:0.884868         | A:0.115132       |
| chr28          | 11434527         | 2 | 292 | A:0.873288         | G:0.126712       |
| chr28          | 11434650         | 2 | 272 | T:0.856618         | TGTG:0.143382    |
| chr28          | 11435664         | 2 | 298 | G:0.899329         | A:0.100671       |
| chr28          | 11435675         | 2 | 296 | G:0.902027         | T:0.097973       |
| chr28          | 11435691         | 2 | 296 | C:0.996622         | T:0.00337838     |
| chr28          | 11435692         | 2 | 296 | G:0.996622         | T:0.00337838     |
| chr28          | 11435780         | 2 | 296 | G:0.878378         | C:0.121622       |
| chr28          | 11436332         | 2 | 300 | G:0.876667         | A:0.123333       |
| chr28          | 11436376         | 2 | 292 | A:0.123288         | G:0.876712       |
| chr28          | 11436526         | 5 | 302 | GGA:0.274834       | G:0.125828       |
| GGAGA:0.175497 | GGAGAGA:0.172185 |   |     | GGAGAGAGA:0.251656 |                  |
| chr28          | 11436632         | 2 | 294 | C:0.863946         | T:0.136054       |
| chr28          | 11436634         | 2 | 294 | G:0.87415          | A:0.12585        |
| chr28          | 11436761         | 2 | 296 | C:0.861486         | T:0.138514       |
| chr28          | 11436807         | 2 | 286 | T:0.863636         | C:0.136364       |
| chr28          | 11436968         | 2 | 304 | G:0.980263         | A:0.0197368      |
| chr28          | 11437489         | 2 | 298 | A:0.956376         | C:0.0436242      |
| chr28          | 11437610         | 2 | 296 | T:0.125 C:0.875    |                  |
| chr28          | 11437708         | 2 | 306 | C:0.392157         | A:0.607843       |
| chr28          | 11438036         | 2 | 298 | C:0.865772         | T:0.134228       |
| chr28          | 11438150         | 2 | 296 | CT:0.128378        | C:0.871622       |
| chr28          | 11438221         | 2 | 298 | T:0.761745         | C:0.238255       |
| chr28          | 11438900         | 2 | 300 | G:0.446667         | A:0.553333       |
| chr28          | 11439207         | 2 | 296 | C:0.47973          | T:0.52027        |
| chr28          | 11439218         | 2 | 294 | T:0.370748         | C:0.629252       |
| chr28          | 11439221         | 2 | 296 | G:0.891892         | T:0.108108       |
| chr28          | 11439498         | 2 | 296 | C:0.462838         | T:0.537162       |
| chr28          | 11439553         | 2 | 306 | C:0.977124         | T:0.0228758      |
| chr28          | 11439861         | 2 | 302 | A:0.731788         | C:0.268212       |
| chr28          | 11439912         | 2 | 298 | G:0.741611         | A:0.258389       |
| chr28          | 11440127         | 2 | 298 | C:0.979866         | T:0.0201342      |
| chr28          | 11440362         | 2 | 294 | C:0.894558         | T:0.105442       |
| chr28          | 11440596         | 2 | 290 | A:0.975862         | T:0.0241379      |
| chr28          | 11440624         | 2 | 296 | TG:0.243243        | T:0.756757       |
| chr28          | 11440955         | 2 | 290 | C:0.517241         | A:0.482759       |
| chr28          | 11440979         | 2 | 296 | C:0.516892         | T:0.483108       |

|             |          |   |     |                      |                 |
|-------------|----------|---|-----|----------------------|-----------------|
| chr28       | 11441034 | 2 | 280 | C:0.782143           | A:0.217857      |
| chr28       | 11441221 | 2 | 296 | C:0.807432           | T:0.192568      |
| chr28       | 11441237 | 2 | 290 | T:0.493103           | C:0.506897      |
| chr28       | 11441467 | 2 | 304 | C:0.815789           | T:0.184211      |
| chr28       | 11441654 | 2 | 296 | C:0.260135           | T:0.739865      |
| chr28       | 11441685 | 2 | 294 | T:0.510204           | G:0.489796      |
| chr28       | 11441756 | 2 | 290 | A:0.268966           | G:0.731034      |
| chr28       | 11441841 | 2 | 296 | T:0.263514           | C:0.736486      |
| chr28       | 11441881 | 2 | 298 | G:0.255034           | A:0.744966      |
| chr28       | 11441889 | 2 | 298 | T:0.255034           | C:0.744966      |
| chr28       | 11442035 | 2 | 312 | A:0.285256           | C:0.714744      |
| chr28       | 11442388 | 2 | 298 | G:0.291946           | C:0.708054      |
| chr28       | 11442453 | 2 | 304 | T:0.996711           | A:0.00328947    |
| chr28       | 11443094 | 2 | 302 | A:0.235099           | G:0.764901      |
| chr28       | 11443106 | 2 | 300 | G:0.496667           | A:0.503333      |
| chr28       | 11443191 | 2 | 314 | G:0.248408           | A:0.751592      |
| chr28       | 11443231 | 2 | 310 | A:0.23871            | T:0.76129       |
| chr28       | 11443345 | 2 | 304 | T:0.483553           | C:0.516447      |
| chr28       | 11443407 | 2 | 298 | C:0.463087           | A:0.536913      |
| chr28       | 11443603 | 2 | 280 | CTATCT:0.928571      | C:0.0714286     |
| chr28       | 11443605 | 2 | 304 | ATCTAATCT:0.884868   | A:              |
| 0.115132    |          |   |     |                      |                 |
| chr28       | 11443607 | 2 | 298 | CT:0.64094           | C:0.35906       |
| chr28       | 11443608 | 2 | 310 | TA:0.73871           | T:0.26129       |
| chr28       | 11443609 | 2 | 308 | AATCT:0.935065       | A:0.0649351     |
| chr28       | 11443610 | 2 | 288 | ATCT:0.545139        | A:0.454861      |
| chr28       | 11443612 | 2 | 310 | C:0.73871            | CA:0.26129      |
| chr28       | 11443613 | 2 | 310 | T:0.73871            | A:0.26129       |
| chr28       | 11443968 | 2 | 306 | T:0.490196           | C:0.509804      |
| chr28       | 11444045 | 2 | 312 | G:0.516026           | C:0.483974      |
| chr28       | 11444217 | 2 | 298 | G:0.510067           | A:0.489933      |
| chr28       | 11444259 | 2 | 280 | C:0.817857           | T:0.182143      |
| chr28       | 11444508 | 3 | 84  | TAA:0.464286         | T:0.416667      |
| TA:0.119048 |          |   |     |                      |                 |
| chr28       | 11444585 | 2 | 292 | C:0.541096           | G:0.458904      |
| chr28       | 11444718 | 2 | 302 | A:0.930464           | G:0.0695364     |
| chr28       | 11445107 | 2 | 296 | A:0.506757           | AG:0.493243     |
| chr28       | 11445115 | 2 | 298 | G:0.597315           | C:0.402685      |
| chr28       | 11446124 | 2 | 302 | C:0.801325           | G:0.198675      |
| chr28       | 11446159 | 2 | 316 | C:0.509494           | T:0.490506      |
| chr28       | 11446167 | 2 | 316 | G:0.509494           | A:0.490506      |
| chr28       | 11446192 | 2 | 310 | C:0.8 T:0.2          |                 |
| chr28       | 11446200 | 2 | 304 | G:0.506579           | C:0.493421      |
| chr28       | 11446255 | 2 | 302 | G:0.970199           | A:0.0298013     |
| chr28       | 11446275 | 2 | 296 | T:0.5 G:0.5          |                 |
| chr28       | 11446490 | 2 | 304 | T:0.292763           | C:0.707237      |
| chr28       | 11446497 | 2 | 304 | G:0.526316           | A:0.473684      |
| chr28       | 11446963 | 2 | 300 | G:0.933333           | A:0.0666667     |
| chr28       | 11447015 | 2 | 288 | A:0.152778           | G:0.847222      |
| chr28       | 11447231 | 2 | 306 | G:0.823529           | A:0.176471      |
| chr28       | 11447532 | 2 | 298 | G:0.47651            | A:0.52349       |
| chr28       | 11447712 | 2 | 308 | T:0.691558           | TATCTC:0.308442 |
| chr28       | 11448227 | 2 | 314 | AGCTGGTCCAT:0.770701 | A:              |
| 0.229299    |          |   |     |                      |                 |



|           |          |   |     |                   |               |
|-----------|----------|---|-----|-------------------|---------------|
| chr28     | 11448339 | 2 | 292 | T:0.777397        | G:0.222603    |
| chr28     | 11448341 | 2 | 294 | T:0.982993        | C:0.0170068   |
| chr28     | 11448848 | 2 | 318 | CAACAGGG:0.764151 | C:            |
| 0.235849  |          |   |     |                   |               |
| chr28     | 11449428 | 2 | 292 | C:0.952055        | T:0.0479452   |
| chr28     | 11449436 | 2 | 290 | AC:0.693103       | A:0.306897    |
| chr28     | 11449587 | 2 | 300 | G:0.94            | A:0.06        |
| chr28     | 11449611 | 2 | 306 | A:0.931373        | G:0.0686275   |
| chr28     | 11449847 | 2 | 294 | C:0.792517        | T:0.207483    |
| chr28     | 11449862 | 2 | 290 | A:0.806897        | G:0.193103    |
| chr28     | 11449948 | 2 | 308 | A:0.941558        | G:0.0584416   |
| chr28     | 11450011 | 2 | 314 | C:0.942675        | A:0.0573248   |
| chr28     | 11450081 | 2 | 294 | T:0.520408        | G:0.479592    |
| chr28     | 11450420 | 2 | 306 | C:0.973856        | T:0.0261438   |
| chr28     | 11450463 | 2 | 312 | C:0.974359        | T:0.025641    |
| chr28     | 11450545 | 2 | 302 | A:0.943709        | T:0.0562914   |
| chr28     | 11450739 | 2 | 310 | G:0.877419        | A:0.122581    |
| chr28     | 11450777 | 2 | 310 | T:0.358065        | C:0.641935    |
| chr28     | 11450789 | 2 | 310 | A:0.358065        | C:0.641935    |
| chr28     | 11450968 | 2 | 312 | G:0.371795        | A:0.628205    |
| chr28     | 11451049 | 2 | 296 | A:0.918919        | AGG:0.0810811 |
| chr28     | 11451066 | 2 | 296 | A:0.381757        | G:0.618243    |
| chr28     | 11451117 | 2 | 296 | G:0.452703        | C:0.547297    |
| chr28     | 11451126 | 2 | 312 | C:0.923077        | CGACTGGTGG:   |
| 0.0769231 |          |   |     |                   |               |
| chr28     | 11451168 | 2 | 302 | A:0.913907        | C:0.0860927   |
| chr28     | 11451413 | 2 | 240 | A:0.779167        | G:0.220833    |
| chr28     | 11452138 | 2 | 264 | T:0.969697        | C:0.030303    |
| chr28     | 11452230 | 2 | 252 | G:0.678571        | A:0.321429    |
| chr28     | 11452504 | 2 | 128 | AGG:0.757812      | A:0.242188    |
| chr28     | 11452694 | 2 | 250 | G:0.736           | T:0.264       |
| chr28     | 11452814 | 2 | 290 | T:0.734483        | C:0.265517    |
| chr28     | 11452912 | 2 | 294 | C:0.979592        | T:0.0204082   |
| chr28     | 11452913 | 2 | 294 | A:0.721088        | G:0.278912    |
| chr28     | 11452971 | 2 | 282 | T:0.978723        | C:0.0212766   |
| chr28     | 11452972 | 2 | 286 | TGTG:0.762238     | T:0.237762    |
| chr28     | 11452982 | 2 | 286 | C:0.762238        | G:0.237762    |
| chr28     | 11453002 | 2 | 288 | T:0.777778        | C:0.222222    |
| chr28     | 11453120 | 2 | 304 | C:0.746711        | A:0.253289    |
| chr28     | 11453144 | 2 | 304 | G:0.950658        | A:0.0493421   |
| chr28     | 11453154 | 2 | 304 | T:0.809211        | C:0.190789    |
| chr28     | 11453161 | 2 | 300 | T:0.756667        | G:0.243333    |
| chr28     | 11453179 | 2 | 300 | T:0.756667        | C:0.243333    |
| chr28     | 11453221 | 2 | 296 | G:0.753378        | A:0.246622    |
| chr28     | 11453242 | 2 | 296 | A:0.753378        | C:0.246622    |
| chr28     | 11453243 | 2 | 296 | C:0.753378        | T:0.246622    |
| chr28     | 11453355 | 2 | 296 | C:0.773649        | T:0.226351    |
| chr28     | 11453388 | 2 | 292 | C:0.746575        | CT:0.253425   |
| chr28     | 11453520 | 2 | 294 | G:0.758503        | A:0.241497    |
| chr28     | 11453524 | 2 | 294 | C:0               | CT:1          |
| chr28     | 11453566 | 2 | 292 | G:0.777397        | A:0.222603    |
| chr28     | 11453615 | 2 | 302 | C:0.807947        | T:0.192053    |
| chr28     | 11453665 | 2 | 294 | AG:0.945578       | A:0.0544218   |
| chr28     | 11453669 | 2 | 298 | G:0.822148        | A:0.177852    |

|           |          |   |     |                   |              |
|-----------|----------|---|-----|-------------------|--------------|
| chr28     | 11453727 | 2 | 298 | T:0.758389        | A:0.241611   |
| chr28     | 11453737 | 2 | 298 | T:0.758389        | C:0.241611   |
| chr28     | 11453738 | 2 | 298 | A:0.758389        | T:0.241611   |
| chr28     | 11453762 | 2 | 290 | A:0.706897        | G:0.293103   |
| chr28     | 11453969 | 2 | 302 | C:0.754967        | A:0.245033   |
| chr28     | 11454093 | 2 | 308 | GC:0.753247       | G:0.246753   |
| chr28     | 11454095 | 2 | 308 | AT:0.753247       | A:0.246753   |
| chr28     | 11454115 | 2 | 308 | C:0.753247        | T:0.246753   |
| chr28     | 11454364 | 2 | 302 | G:0.960265        | A:0.0397351  |
| chr28     | 11454578 | 2 | 290 | GA:0.693103       | G:0.306897   |
| chr28     | 11454670 | 2 | 290 | GA:0.968966       | G:0.0310345  |
| chr28     | 11454721 | 2 | 286 | C:0.769231        | T:0.230769   |
| chr28     | 11454767 | 2 | 290 | C:0.97931         | G:0.0206897  |
| chr28     | 11454777 | 2 | 284 | GT:0.947183       | G:0.0528169  |
| chr28     | 11454794 | 2 | 302 | G:0.97351         | A:0.0264901  |
| chr28     | 11454897 | 2 | 304 | C:0.976974        | T:0.0230263  |
| chr28     | 11454945 | 2 | 298 | G:0.97651         | A:0.0234899  |
| chr28     | 11455006 | 2 | 304 | G:0.789474        | A:0.210526   |
| chr28     | 11455089 | 2 | 298 | G:0.986577        | A:0.0134228  |
| chr28     | 11455146 | 2 | 312 | TAGGTCAC:0.967949 | T:           |
| 0.0320513 |          |   |     |                   |              |
| chr28     | 11455185 | 2 | 302 | C:0.950331        | A:0.0496689  |
| chr28     | 11455244 | 2 | 302 | G:0.778146        | A:0.221854   |
| chr28     | 11455431 | 2 | 306 | C:0.98366         | T:0.0163399  |
| chr28     | 11455510 | 2 | 308 | A:0.983766        | G:0.0162338  |
| chr28     | 11455519 | 2 | 308 | T:0.983766        | A:0.0162338  |
| chr28     | 11455548 | 2 | 306 | T:0.98366         | G:0.0163399  |
| chr28     | 11455648 | 2 | 306 | A:0.748366        | C:0.251634   |
| chr28     | 11456272 | 2 | 306 | T:0.702614        | C:0.297386   |
| chr28     | 11456386 | 2 | 312 | A:0.798077        | C:0.201923   |
| chr28     | 11456427 | 2 | 310 | C:0.787097        | T:0.212903   |
| chr28     | 11456677 | 2 | 306 | T:0.960784        | C:0.0392157  |
| chr28     | 11456918 | 2 | 306 | A:0.98366         | G:0.0163399  |
| chr28     | 11457146 | 2 | 296 | A:0.983108        | T:0.0168919  |
| chr28     | 11457445 | 2 | 298 | A:0.97651         | G:0.0234899  |
| chr28     | 11457551 | 2 | 300 | C:0.95            | T:0.05       |
| chr28     | 11457766 | 2 | 296 | G:0.820946        | A:0.179054   |
| chr28     | 11458514 | 2 | 306 | C:0.964052        | T:0.0359477  |
| chr28     | 11458601 | 2 | 298 | G:0.963087        | A:0.0369128  |
| chr28     | 11458672 | 2 | 300 | A:0.75            | AT:0.25      |
| chr28     | 11458715 | 2 | 304 | T:0.976974        | C:0.0230263  |
| chr28     | 11458967 | 2 | 302 | T:0.956954        | A:0.0430464  |
| chr28     | 11459007 | 2 | 300 | A:0.956667        | AG:0.0433333 |
| chr28     | 11459431 | 2 | 304 | T:0.957237        | A:0.0427632  |
| chr28     | 11459445 | 2 | 300 | G:0.98            | A:0.02       |
| chr28     | 11459521 | 2 | 282 | G:0.829787        | A:0.170213   |
| chr28     | 11459530 | 2 | 284 | G:0.940141        | A:0.0598592  |
| chr28     | 11459536 | 2 | 294 | G:0.979592        | A:0.0204082  |
| chr28     | 11459549 | 2 | 298 | C:0.956376        | T:0.0436242  |
| chr28     | 11459552 | 2 | 296 | G:0.827703        | A:0.172297   |
| chr28     | 11459572 | 2 | 296 | G:0.827703        | A:0.172297   |
| chr28     | 11459585 | 2 | 294 | G:0.908163        | A:0.0918367  |
| chr28     | 11459667 | 2 | 304 | A:0.986842        | G:0.0131579  |
| chr28     | 11459673 | 2 | 304 | AT:0.75           | A:0.25       |

|       |            |     |                             |              |
|-------|------------|-----|-----------------------------|--------------|
| chr28 | 11459680 2 | 302 | C:0.807947                  | A:0.192053   |
| chr28 | 11459682 2 | 304 | A:0.75 C:0.25               |              |
| chr28 | 11459865 3 | 272 | TG:0.558824                 | T:0.3125 GG: |
|       | 0.128676   |     |                             |              |
| chr28 | 11459956 2 | 302 | C:0.983444                  | T:0.0165563  |
| chr28 | 11460400 2 | 304 | C:0.730263                  | CT:0.269737  |
| chr28 | 11460725 2 | 302 | T:0.811258                  | C:0.188742   |
| chr28 | 11460854 2 | 280 | C:0.807143                  | T:0.192857   |
| chr28 | 11461325 3 | 278 | TAA:0.586331                | T:0.125899   |
|       | TA:0.28777 |     |                             |              |
| chr28 | 11461353 2 | 294 | C:0.792517                  | T:0.207483   |
| chr28 | 11461437 2 | 300 | A:0.953333                  | G:0.0466667  |
| chr28 | 11461946 2 | 298 | G:0.956376                  | T:0.0436242  |
| chr28 | 11463041 2 | 306 | T:0.748366                  | C:0.251634   |
| chr28 | 11463062 2 | 306 | A:0.748366                  | G:0.251634   |
| chr28 | 11463108 2 | 298 | T:0.966443                  | A:0.033557   |
| chr28 | 11463293 2 | 298 | CG:0.765101                 | C:0.234899   |
| chr28 | 11463420 2 | 298 | T:0.751678                  | C:0.248322   |
| chr28 | 11463474 2 | 308 | G:0.918831                  | T:0.0811688  |
| chr28 | 11464030 2 | 308 | A:0.769481                  | C:0.230519   |
| chr28 | 11464210 2 | 308 | T:0.727273                  | C:0.272727   |
| chr28 | 11464364 2 | 300 | A:0.14 T:0.86               |              |
| chr28 | 11464436 2 | 304 | C:0.973684                  | A:0.0263158  |
| chr28 | 11465027 2 | 296 | C:0.753378                  | G:0.246622   |
| chr28 | 11465227 2 | 304 | G:0.819079                  | T:0.180921   |
| chr28 | 11465587 2 | 304 | T:0.720395                  | C:0.279605   |
| chr28 | 11465771 2 | 308 | T:0.743506                  | G:0.256494   |
| chr28 | 11466352 2 | 310 | T:0.741935                  | C:0.258065   |
| chr28 | 11466397 2 | 304 | G:0.963816                  | A:0.0361842  |
| chr28 | 11466444 2 | 294 | A:0.676871                  | G:0.323129   |
| chr28 | 11467469 2 | 294 | C:0.972789                  | A:0.0272109  |
| chr28 | 11467596 4 | 318 | AGGATGGAT:0.556604          | A:           |
|       | 0.261006   |     | AGGATGGATGGAT:0.150943      |              |
| chr28 | 11469003 2 | 296 | G:0.986486                  | A:0.0135135  |
| chr28 | 11469347 2 | 308 | T:0.655844                  | C:0.344156   |
| chr28 | 11469374 2 | 310 | A:0.977419                  | T:0.0225806  |
| chr28 | 11469448 2 | 300 | G:0.966667                  | A:0.0333333  |
| chr28 | 11469466 2 | 310 | C:0.970968                  | T:0.0290323  |
| chr28 | 11469490 2 | 300 | G:0.95 A:0.05               |              |
| chr28 | 11469498 2 | 308 | A:0.983766                  | G:0.0162338  |
| chr28 | 11469666 2 | 308 | G:0.925325                  | C:0.0746753  |
| chr28 | 11469897 2 | 308 | G:0.974026                  | C:0.025974   |
| chr28 | 11470230 2 | 304 | T:0.957237                  | C:0.0427632  |
| chr28 | 11470342 2 | 300 | TGTCA:0.81                  | T:0.19       |
| chr28 | 11471124 2 | 308 | G:0.980519                  | C:0.0194805  |
| chr28 | 11471161 2 | 300 | G:0.953333                  | A:0.0466667  |
| chr28 | 11471168 2 | 300 | C:0.97 T:0.03               |              |
| chr28 | 11471323 2 | 314 | GATATAAATCTGCACACA:0.815287 |              |
|       | G:0.184713 |     |                             |              |
| chr28 | 11471334 2 | 314 | G:0.847134                  | A:0.152866   |
| chr28 | 11471434 2 | 308 | C:0.863636                  | T:0.136364   |
| chr28 | 11471804 2 | 290 | T:0.782759                  | G:0.217241   |
| chr28 | 11471966 2 | 296 | T:0.905405                  | C:0.0945946  |
| chr28 | 11472208 2 | 304 | A:0.759868                  | G:0.240132   |

|             |          |   |     |               |              |
|-------------|----------|---|-----|---------------|--------------|
| chr28       | 11472488 | 2 | 298 | T:0.748322    | G:0.251678   |
| chr28       | 11472688 | 2 | 292 | G:0.907534    | A:0.0924658  |
| chr28       | 11472799 | 2 | 316 | C:0.924051    | T:0.0759494  |
| chr28       | 11472986 | 2 | 304 | T:0.842105    | C:0.157895   |
| chr28       | 11473001 | 2 | 298 | C:0.744966    | T:0.255034   |
| chr28       | 11473356 | 2 | 306 | C:0.771242    | G:0.228758   |
| chr28       | 11473384 | 2 | 304 | G:0.990132    | T:0.00986842 |
| chr28       | 11473414 | 2 | 302 | A:0.847682    | T:0.152318   |
| chr28       | 11473688 | 2 | 316 | A:0.974684    | G:0.0253165  |
| chr28       | 11474130 | 2 | 310 | T:0.832258    | C:0.167742   |
| chr28       | 11474197 | 2 | 304 | T:0.822368    | C:0.177632   |
| chr28       | 11474961 | 2 | 294 | G:0.989796    | A:0.0102041  |
| chr28       | 11475340 | 2 | 310 | A:0.980645    | G:0.0193548  |
| chr28       | 11475421 | 2 | 312 | G:0.983974    | C:0.0160256  |
| chr28       | 11475581 | 2 | 304 | GT:0.769737   | G:0.230263   |
| chr28       | 11475811 | 2 | 294 | G:0.986395    | A:0.0136054  |
| chr28       | 11476024 | 2 | 304 | G:0.983553    | A:0.0164474  |
| chr28       | 11476538 | 2 | 304 | A:0.983553    | G:0.0164474  |
| chr28       | 11476652 | 2 | 292 | G:0.989726    | A:0.010274   |
| chr28       | 11476824 | 2 | 296 | G:0.983108    | A:0.0168919  |
| chr28       | 11477140 | 2 | 304 | G:0.986842    | A:0.0131579  |
| chr28       | 11477164 | 2 | 306 | G:0.96732     | C:0.0326797  |
| chr28       | 11477263 | 2 | 318 | C:0.981132    | CATATCTT:    |
| 0.0188679   |          |   |     |               |              |
| chr28       | 11477418 | 2 | 306 | C:0.986928    | T:0.0130719  |
| chr28       | 11477480 | 2 | 316 | T:0.987342    | G:0.0126582  |
| chr28       | 11477587 | 2 | 306 | T:0.98366     | C:0.0163399  |
| chr28       | 11477592 | 2 | 306 | C:0.98366     | G:0.0163399  |
| chr28       | 11477687 | 2 | 312 | G:0.983974    | T:0.0160256  |
| chr28       | 11477721 | 2 | 304 | C:0.986842    | T:0.0131579  |
| chr28       | 11477917 | 2 | 300 | G:0.33 C:0.67 |              |
| chr28       | 11477984 | 2 | 316 | C:0.984177    | T:0.0158228  |
| chr28       | 11478176 | 2 | 302 | C:0.761589    | G:0.238411   |
| chr28       | 11478211 | 2 | 298 | T:0.983221    | C:0.0167785  |
| chr28       | 11478307 | 2 | 298 | T:0.986577    | C:0.0134228  |
| chr28       | 11478461 | 2 | 292 | G:0.982877    | A:0.0171233  |
| chr28       | 11478477 | 2 | 296 | T:0.986486    | C:0.0135135  |
| chr28       | 11478481 | 3 | 296 | C:0.918919    | T:0.0135135  |
| G:0.0675676 |          |   |     |               |              |
| chr28       | 11478581 | 2 | 314 | G:0.987261    | C:0.0127389  |
| chr28       | 11478646 | 2 | 312 | T:0.974359    | C:0.025641   |
| chr28       | 11478861 | 2 | 312 | C:0.987179    | A:0.0128205  |
| chr28       | 11478872 | 2 | 312 | A:0.987179    | G:0.0128205  |
| chr28       | 11478879 | 2 | 310 | T:0.774194    | C:0.225806   |
| chr28       | 11479017 | 2 | 308 | A:0.99026     | G:0.00974026 |
| chr28       | 11480928 | 2 | 294 | G:0.860544    | T:0.139456   |
| chr28       | 11481038 | 2 | 302 | A:0.880795    | G:0.119205   |
| chr28       | 11481693 | 2 | 296 | G:0.915541    | T:0.0844595  |
| chr28       | 11482073 | 2 | 312 | G:0.910256    | A:0.0897436  |
| chr28       | 11482106 | 2 | 306 | G:0.98366     | GA:0.0163399 |
| chr28       | 11482887 | 2 | 302 | G:0.92053     | T:0.0794702  |
| chr28       | 11483039 | 2 | 308 | C:0.961039    | G:0.038961   |
| chr28       | 11483102 | 2 | 302 | G:0.983444    | GT:0.0165563 |
| chr28       | 11483166 | 2 | 308 | C:0.964286    | A:0.0357143  |

|             |          |   |     |               |                   |
|-------------|----------|---|-----|---------------|-------------------|
| chr28       | 11483215 | 2 | 296 | A:0.929054    | C:0.0709459       |
| chr28       | 11483322 | 2 | 306 | T:0.964052    | C:0.0359477       |
| chr28       | 11483461 | 2 | 304 | G:0.963816    | A:0.0361842       |
| chr28       | 11483593 | 2 | 306 | T:0.872549    | C:0.127451        |
| chr28       | 11483649 | 2 | 300 | T:0.956667    | C:0.0433333       |
| chr28       | 11483657 | 2 | 296 | C:0.976351    | T:0.0236486       |
| chr28       | 11483764 | 2 | 292 | T:0.941781    | C:0.0582192       |
| chr28       | 11483777 | 2 | 284 | A:0.922535    | G:0.0774648       |
| chr28       | 11483812 | 2 | 316 | A:0.962025    | AAAAGAAAAG:       |
| 0.0379747   |          |   |     |               |                   |
| chr28       | 11483849 | 2 | 306 | A:0.846405    | G:0.153595        |
| chr28       | 11484111 | 2 | 298 | C:0.842282    | T:0.157718        |
| chr28       | 11484522 | 2 | 294 | T:0.979592    | C:0.0204082       |
| chr28       | 11484626 | 2 | 288 | G:0.979167    | C:0.0208333       |
| chr28       | 11484728 | 2 | 296 | C:0.898649    | T:0.101351        |
| chr28       | 11484740 | 2 | 296 | C:0.959459    | T:0.0405405       |
| chr28       | 11484799 | 2 | 294 | C:0.982993    | T:0.0170068       |
| chr28       | 11484800 | 2 | 296 | G:0.966216    | A:0.0337838       |
| chr28       | 11484987 | 2 | 306 | G:0.957516    | A:0.0424837       |
| chr28       | 11485184 | 2 | 296 | T:0.962838    | C:0.0371622       |
| chr28       | 11485308 | 2 | 302 | G:0.986755    | A:0.013245        |
| chr28       | 11485412 | 2 | 294 | G:0.952381    | A:0.047619        |
| chr28       | 11485563 | 2 | 300 | CT:0.803333   | C:0.196667        |
| chr28       | 11485583 | 2 | 308 | A:0.876623    | G:0.123377        |
| chr28       | 11485671 | 3 | 304 | A:0.878289    | C:0.0822368       |
| T:0.0394737 |          |   |     |               |                   |
| chr28       | 11485684 | 2 | 304 | C:0.960526    | T:0.0394737       |
| chr28       | 11485793 | 2 | 304 | C:0.953947    | T:0.0460526       |
| chr28       | 11485949 | 2 | 304 | G:0.980263    | T:0.0197368       |
| chr28       | 11485966 | 2 | 318 | T:0.886792    | TGTTTTTG:0.113208 |
| chr28       | 11486019 | 2 | 294 | T:0.914966    | C:0.085034        |
| chr28       | 11486116 | 2 | 294 | G:0.965986    | A:0.0340136       |
| chr28       | 11486158 | 2 | 292 | G:0.917808    | A:0.0821918       |
| chr28       | 11486231 | 2 | 290 | T:0.965517    | C:0.0344828       |
| chr28       | 11486251 | 2 | 298 | C:0.97651     | G:0.0234899       |
| chr28       | 11486293 | 2 | 302 | T:0.824503    | TG:0.175497       |
| chr28       | 11486369 | 2 | 304 | A:0.907895    | T:0.0921053       |
| chr28       | 11486603 | 2 | 300 | T:0.83 C:0.17 |                   |
| chr28       | 11486821 | 2 | 304 | C:0.986842    | T:0.0131579       |
| chr28       | 11486830 | 2 | 300 | A:0.83 G:0.17 |                   |
| chr28       | 11486883 | 2 | 304 | A:0.957237    | G:0.0427632       |
| chr28       | 11487163 | 2 | 304 | G:0.990132    | T:0.00986842      |
| chr28       | 11487466 | 2 | 304 | T:0.940789    | C:0.0592105       |
| chr28       | 11487880 | 2 | 302 | T:0.834437    | C:0.165563        |
| chr28       | 11488166 | 2 | 304 | C:0.930921    | T:0.0690789       |
| chr28       | 11488286 | 2 | 304 | TGC:0.934211  | T:0.0657895       |
| chr28       | 11488289 | 2 | 318 | G:0.921384    | GCTCT:0.0786164   |
| chr28       | 11488291 | 2 | 318 | G:0.902516    | T:0.0974843       |
| chr28       | 11488341 | 2 | 318 | A:0.77673     | G:0.22327         |
| chr28       | 11488740 | 2 | 300 | G:0.933333    | A:0.0666667       |
| chr28       | 11488817 | 2 | 308 | G:0.931818    | A:0.0681818       |
| chr28       | 11488832 | 2 | 308 | C:0.798701    | G:0.201299        |
| chr28       | 11489578 | 2 | 286 | G:0.98951     | A:0.0104895       |
| chr28       | 11489756 | 2 | 258 | T:0.728682    | TA:0.271318       |

|           |          |   |     |                  |               |
|-----------|----------|---|-----|------------------|---------------|
| chr28     | 11489966 | 2 | 304 | G:0.960526       | A:0.0394737   |
| chr28     | 11490486 | 2 | 298 | G:0.986577       | A:0.0134228   |
| chr28     | 11490715 | 2 | 318 | A:0.90566        | G:0.0943396   |
| chr28     | 11490799 | 2 | 302 | T:0.913907       | A:0.0860927   |
| chr28     | 11490936 | 2 | 312 | A:0.961538       | G:0.0384615   |
| chr28     | 11490937 | 2 | 312 | T:0.961538       | C:0.0384615   |
| chr28     | 11490945 | 2 | 312 | G:0.961538       | T:0.0384615   |
| chr28     | 11491365 | 2 | 306 | C:0.960784       | G:0.0392157   |
| chr28     | 11491994 | 2 | 300 | A:0.0333333      | AACT:0.966667 |
| chr28     | 11492273 | 2 | 302 | A:0.980132       | G:0.0198675   |
| chr28     | 11492868 | 2 | 250 | AG:0             | A:1           |
| chr28     | 11493620 | 2 | 300 | C:0.983333       | A:0.0166667   |
| chr28     | 11493665 | 2 | 282 | CG:0.975177      | C:0.0248227   |
| chr28     | 11493738 | 2 | 284 | G:0.975352       | A:0.0246479   |
| chr28     | 11494754 | 2 | 290 | G:0.934483       | A:0.0655172   |
| chr28     | 11494775 | 2 | 296 | AG:0.97973       | A:0.0202703   |
| chr28     | 11495053 | 2 | 306 | T:0.980392       | C:0.0196078   |
| chr28     | 11495155 | 2 | 304 | C:0.990132       | T:0.00986842  |
| chr28     | 11495639 | 2 | 302 | G:0.970199       | A:0.0298013   |
| chr28     | 11495958 | 2 | 292 | G:0.965753       | A:0.0342466   |
| chr28     | 11496440 | 2 | 310 | C:0.964516       | T:0.0354839   |
| chr28     | 11496629 | 2 | 300 | G:0.973333       | A:0.0266667   |
| chr28     | 11496751 | 2 | 294 | G:0.955782       | GT:0.0442177  |
| chr28     | 11496843 | 2 | 302 | G:0.678808       | A:0.321192    |
| chr28     | 11496867 | 2 | 298 | C:0.963087       | T:0.0369128   |
| chr28     | 11497063 | 2 | 304 | T:0.957237       | C:0.0427632   |
| chr28     | 11497560 | 2 | 298 | C:0.969799       | T:0.0302013   |
| chr28     | 11497797 | 2 | 304 | T:0.973684       | A:0.0263158   |
| chr28     | 11497809 | 2 | 304 | TA:0.973684      | T:0.0263158   |
| chr28     | 11498015 | 2 | 294 | A:0.969388       | AT:0.0306122  |
| chr28     | 11499679 | 2 | 308 | A:0.970779       | G:0.0292208   |
| chr28     | 11501918 | 2 | 288 | T:0.96875        | C:0.03125     |
| chr28     | 11502579 | 2 | 300 | A:0.973333       | G:0.0266667   |
| chr28     | 11502629 | 2 | 310 | T:0.964516       | C:0.0354839   |
| chr28     | 11502635 | 2 | 310 | A:0.964516       | G:0.0354839   |
| chr28     | 11502653 | 2 | 308 | C:0.964286       | T:0.0357143   |
| chr28     | 11502734 | 2 | 304 | A:0.963816       | C:0.0361842   |
| chr28     | 11503113 | 2 | 302 | A:0.97351        | G:0.0264901   |
| chr28     | 11503177 | 2 | 300 | T:0.973333       | C:0.0266667   |
| chr28     | 11503288 | 2 | 306 | A:0.957516       | G:0.0424837   |
| chr28     | 11503334 | 2 | 304 | G:0.957237       | A:0.0427632   |
| chr28     | 11503634 | 2 | 304 | T:0.963816       | C:0.0361842   |
| chr28     | 11504069 | 2 | 278 | G:0.953237       | A:0.0467626   |
| chr28     | 11504071 | 2 | 278 | T:0.953237       | C:0.0467626   |
| chr28     | 11504334 | 2 | 142 | ACC:0.93662      | A:0.0633803   |
| chr28     | 11504721 | 2 | 310 | CCATTTT:0.948387 | C:            |
| 0.0516129 |          |   |     |                  |               |
| chr28     | 11505153 | 2 | 290 | G:0.958621       | T:0.0413793   |
| chr28     | 11505207 | 2 | 308 | G:0.961039       | A:0.038961    |
| chr28     | 11505367 | 2 | 302 | A:0.970199       | G:0.0298013   |
| chr28     | 11505524 | 2 | 308 | C:0.967532       | T:0.0324675   |
| chr28     | 11505676 | 2 | 306 | C:0.921569       | T:0.0784314   |
| chr28     | 11505773 | 2 | 298 | G:0.681208       | GA:0.318792   |
| chr28     | 11505867 | 2 | 318 | G:0.974843       | A:0.0251572   |

|                                                               |          |   |     |                 |                |
|---------------------------------------------------------------|----------|---|-----|-----------------|----------------|
| chr28                                                         | 11506135 | 3 | 316 | CCT:0.64557     | C:0.0632911    |
| CCTCTCT:0.291139                                              |          |   |     |                 |                |
| chr28                                                         | 11506272 | 2 | 312 | T:0.971154      | C:0.0288462    |
| chr28                                                         | 11506414 | 2 | 298 | A:0.620805      | G:0.379195     |
| chr28                                                         | 11506817 | 2 | 298 | AC:0.687919     | A:0.312081     |
| chr28                                                         | 11507238 | 3 | 296 | TTG:0.577703    | T:0.138514     |
| TTGTG:0.283784                                                |          |   |     |                 |                |
| chr28                                                         | 11507382 | 2 | 306 | A:0.637255      | G:0.362745     |
| chr28                                                         | 11507492 | 2 | 300 | A:0.663333      | T:0.336667     |
| chr28                                                         | 11507572 | 2 | 306 | C:0.633987      | A:0.366013     |
| chr28                                                         | 11507680 | 2 | 308 | G:0.649351      | A:0.350649     |
| chr28                                                         | 11507821 | 2 | 308 | T:0.649351      | C:0.350649     |
| chr28                                                         | 11507946 | 2 | 310 | G:0.63871       | T:0.36129      |
| chr28                                                         | 11508055 | 2 | 302 | A:0.668874      | G:0.331126     |
| chr28                                                         | 11508165 | 2 | 310 | C:0.990323      | T:0.00967742   |
| chr28                                                         | 11509514 | 2 | 266 | CT:0.860902     | C:0.139098     |
| chr28                                                         | 11509614 | 2 | 302 | G:0.927152      | T:0.0728477    |
| chr28                                                         | 11510272 | 2 | 296 | T:0.679054      | G:0.320946     |
| chr28                                                         | 11511212 | 2 | 316 | C:0.683544      |                |
| CGCCTTGATTATGATACTACACTTGATCTTAGCCAAAAGGCCGAGAAGCGAT:0.316456 |          |   |     |                 |                |
| chr28                                                         | 11511222 | 2 | 314 | A:0.914013      | G:0.0859873    |
| chr28                                                         | 11511233 | 2 | 316 | A:0.96519       | G:0.0348101    |
| chr28                                                         | 11511316 | 2 | 306 | C:0.676471      | T:0.323529     |
| chr28                                                         | 11511841 | 2 | 302 | T:0.672185      | C:0.327815     |
| chr28                                                         | 11511913 | 2 | 310 | C:0.664516      | T:0.335484     |
| chr28                                                         | 11512011 | 2 | 276 | TTG:0.0108696   | T:0.98913      |
| chr28                                                         | 11512407 | 2 | 300 | A:0.91 T:0.09   |                |
| chr28                                                         | 11513140 | 2 | 238 | CT:0.634454     | C:0.365546     |
| chr28                                                         | 11513530 | 2 | 302 | A:0.798013      | G:0.201987     |
| chr28                                                         | 11513642 | 2 | 310 | C:0.967742      | T:0.0322581    |
| chr28                                                         | 11514371 | 2 | 310 | T:0.629032      | C:0.370968     |
| chr28                                                         | 11514674 | 2 | 316 | C:0 CA:1        |                |
| chr28                                                         | 11514693 | 2 | 316 | C:0 T:1         |                |
| chr28                                                         | 11514765 | 2 | 312 | A:0.980769      | T:0.0192308    |
| chr28                                                         | 11514797 | 2 | 314 | G:0.535032      | GATT:0.464968  |
| chr28                                                         | 11514978 | 2 | 304 | C:0.526316      | G:0.473684     |
| chr28                                                         | 11515167 | 2 | 306 | GCTGT:0.545752  | G:0.454248     |
| chr28                                                         | 11515383 | 2 | 304 | T:0.526316      | C:0.473684     |
| chr28                                                         | 11515793 | 2 | 302 | C:0.549669      | G:0.450331     |
| chr28                                                         | 11516163 | 2 | 304 | CAAGAT:0.907895 | C:0.0921053    |
| chr28                                                         | 11516390 | 2 | 300 | C:0.916667      | CCCA:0.0833333 |
| chr28                                                         | 11516429 | 2 | 302 | C:0.907285      | T:0.0927152    |
| chr28                                                         | 11516463 | 2 | 300 | C:0.973333      | T:0.0266667    |
| chr28                                                         | 11516757 | 2 | 304 | G:0.555921      | A:0.444079     |
| chr28                                                         | 11516761 | 2 | 306 | A:0.444444      | G:0.555556     |
| chr28                                                         | 11516798 | 2 | 306 | C:0.771242      | T:0.228758     |
| chr28                                                         | 11517070 | 2 | 296 | G:0.898649      | C:0.101351     |
| chr28                                                         | 11517763 | 2 | 304 | A:0.924342      | T:0.0756579    |
| chr28                                                         | 11517929 | 2 | 292 | C:0.90411       | T:0.0958904    |
| chr28                                                         | 11518074 | 2 | 298 | C:0.963087      | T:0.0369128    |
| chr28                                                         | 11518205 | 2 | 292 | G:0.924658      | A:0.0753425    |
| chr28                                                         | 11518482 | 2 | 296 | G:0.800676      | A:0.199324     |
| chr28                                                         | 11518915 | 2 | 286 | C:0.944056      | T:0.0559441    |
| chr28                                                         | 11519820 | 2 | 288 | G:0.541667      | A:0.458333     |

|                       |              |   |     |                |                  |
|-----------------------|--------------|---|-----|----------------|------------------|
| chr28                 | 11520070     | 2 | 294 | A:0.435374     | C:0.564626       |
| chr28                 | 11520739     | 2 | 310 | A:0.480645     | ATTTAT:0.519355  |
| chr28                 | 11521589     | 2 | 294 | TCGC:0.462585  | T:0.537415       |
| chr28                 | 11521714     | 2 | 292 | C:0.482877     | A:0.517123       |
| chr28                 | 11522169     | 2 | 284 | C:0.492958     | T:0.507042       |
| chr28                 | 11522337     | 2 | 270 | CT:0.914815    | C:0.0851852      |
| chr28                 | 11522354     | 4 | 294 | T:0.527211     | C:0.12585        |
| TC:0.163265           | TTC:0.183673 |   |     |                |                  |
| chr28                 | 11522935     | 2 | 310 | TA:0.490323    | T:0.509677       |
| chr28                 | 11523560     | 2 | 196 | G:0.357143     | GC:0.642857      |
| chr28                 | 11524592     | 2 | 302 | C:0.764901     | T:0.235099       |
| chr28                 | 11525728     | 2 | 290 | A:0.813793     | G:0.186207       |
| chr28                 | 11526058     | 2 | 272 | G:0.966912     | A:0.0330882      |
| chr28                 | 11527611     | 2 | 300 | T:0.523333     | C:0.476667       |
| chr28                 | 11528478     | 2 | 312 | G:0.919872     | A:0.0801282      |
| chr28                 | 11530233     | 2 | 282 | C:0            | CG:1             |
| chr28                 | 11530244     | 2 | 292 | A:0            | C:1              |
| chr28                 | 11530269     | 2 | 298 | C:0            | CA:1             |
| chr28                 | 11530274     | 2 | 298 | AT:0           | A:1              |
| chr28                 | 11530369     | 2 | 306 | G:0.80719      | A:0.19281        |
| chr28                 | 11530818     | 2 | 290 | C:0.968966     | G:0.0310345      |
| chr28                 | 11530874     | 2 | 294 | C:0.972789     | T:0.0272109      |
| chr28                 | 11531543     | 2 | 306 | G:0.54902      | T:0.45098        |
| chr28                 | 11532105     | 2 | 294 | T:0.952381     | TGAGA:0.047619   |
| chr28                 | 11532111     | 2 | 292 | A:0.928082     | G:0.0719178      |
| chr28                 | 11532192     | 2 | 296 | G:0.962838     | A:0.0371622      |
| chr28                 | 11532549     | 2 | 288 | G:0.965278     | A:0.0347222      |
| chr28                 | 11532847     | 2 | 308 | T:0.964286     | TACCAC:0.0357143 |
| chr28                 | 11533505     | 2 | 308 | T:0.496753     | A:0.503247       |
| chr28                 | 11533827     | 2 | 302 | A:0.887417     | G:0.112583       |
| chr28                 | 11533856     | 2 | 308 | T:0.977273     | A:0.0227273      |
| chr28                 | 11533911     | 2 | 308 | T:0.487013     | C:0.512987       |
| chr28                 | 11533989     | 2 | 288 | C:0.5          | CAG:0.5          |
| chr28                 | 11534005     | 2 | 292 | C:0.962329     | T:0.0376712      |
| chr28                 | 11534124     | 2 | 308 | T:0.970779     | C:0.0292208      |
| chr28                 | 11534183     | 2 | 308 | C:0.967532     | CT:0.0324675     |
| chr28                 | 11534650     | 2 | 312 | G:0.903846     | A:0.0961538      |
| chr28                 | 11534799     | 2 | 304 | C:0.957237     | T:0.0427632      |
| chr28                 | 11535501     | 2 | 302 | C:0.688742     | T:0.311258       |
| chr28                 | 11535645     | 2 | 292 | G:0.924658     | GA:0.0753425     |
| chr28                 | 11535897     | 2 | 304 | C:0.921053     | T:0.0789474      |
| chr28                 | 11535924     | 2 | 298 | C:0.973154     | T:0.0268456      |
| chr28                 | 11535926     | 2 | 298 | C:0.919463     | G:0.0805369      |
| chr28                 | 11536344     | 2 | 302 | C:0.92053      | A:0.0794702      |
| chr28                 | 11536414     | 2 | 298 | G:0.949664     | A:0.0503356      |
| chr28                 | 11536599     | 2 | 256 | CT:0.523438    | C:0.476562       |
| chr28                 | 11536711     | 2 | 292 | G:0.934932     | GA:0.0650685     |
| chr28                 | 11537054     | 3 | 312 | GTCTC:0.532051 | G:0.426282       |
| GTCTCTCTCTC:0.0416667 |              |   |     |                |                  |
| chr28                 | 11537056     | 2 | 312 | C:0.967949     | CTCTCTCTG:       |
| 0.0320513             |              |   |     |                |                  |
| chr28                 | 11537152     | 2 | 308 | T:0.928571     | C:0.0714286      |
| chr28                 | 11537281     | 2 | 280 | G:0.932143     | A:0.0678571      |
| chr28                 | 11537416     | 2 | 306 | G:0.751634     | A:0.248366       |



|       |          |   |     |               |                   |
|-------|----------|---|-----|---------------|-------------------|
| chr28 | 11537696 | 2 | 290 | C:0.948276    | T:0.0517241       |
| chr28 | 11538009 | 2 | 314 | A:0.703822    | C:0.296178        |
| chr28 | 11538294 | 2 | 304 | T:0.976974    | TC:0.0230263      |
| chr28 | 11538675 | 2 | 292 | T:0.931507    | C:0.0684932       |
| chr28 | 11538753 | 2 | 302 | A:0.688742    | G:0.311258        |
| chr28 | 11539134 | 2 | 302 | GC:0.622517   | G:0.377483        |
| chr28 | 11539147 | 2 | 306 | T:0.633987    | C:0.366013        |
| chr28 | 11539150 | 2 | 300 | T:0.0266667   | C:0.973333        |
| chr28 | 11539227 | 2 | 308 | G:0.792208    | T:0.207792        |
| chr28 | 11539262 | 2 | 312 | C:0.964744    | T:0.0352564       |
| chr28 | 11540390 | 2 | 296 | C:0.972973    | T:0.027027        |
| chr28 | 11540567 | 2 | 302 | C:0.933775    | T:0.0662252       |
| chr28 | 11540668 | 2 | 292 | C:0.921233    | T:0.0787671       |
| chr28 | 11540718 | 2 | 300 | G:0.556667    | C:0.443333        |
| chr28 | 11540928 | 2 | 292 | G:0.561644    | A:0.438356        |
| chr28 | 11541108 | 2 | 302 | A:0.357616    | C:0.642384        |
| chr28 | 11541429 | 2 | 298 | G:0.788591    | A:0.211409        |
| chr28 | 11541457 | 2 | 296 | G:0.969595    | T:0.0304054       |
| chr28 | 11541535 | 2 | 300 | G:0.783333    | A:0.216667        |
| chr28 | 11541554 | 2 | 304 | C:0.996711    | A:0.00328947      |
| chr28 | 11542693 | 2 | 304 | C:0.782895    | T:0.217105        |
| chr28 | 11543092 | 2 | 300 | G:0.28        | GCC:0.72          |
| chr28 | 11543557 | 2 | 292 | A:0.589041    | C:0.410959        |
| chr28 | 11543704 | 2 | 304 | A:0.381579    | G:0.618421        |
| chr28 | 11543708 | 2 | 302 | A:0.990066    | C:0.00993377      |
| chr28 | 11543713 | 2 | 304 | A:0.381579    | C:0.618421        |
| chr28 | 11544014 | 2 | 300 | G:0.986667    | A:0.0133333       |
| chr28 | 11544060 | 2 | 310 | A:0.787097    | G:0.212903        |
| chr28 | 11544073 | 2 | 306 | C:0.787582    | T:0.212418        |
| chr28 | 11544252 | 2 | 290 | C:0.924138    | T:0.0758621       |
| chr28 | 11544280 | 2 | 294 | A:0.656463    | G:0.343537        |
| chr28 | 11544391 | 2 | 294 | C:0.717687    | T:0.282313        |
| chr28 | 11544484 | 2 | 300 | C:0.416667    | T:0.583333        |
| chr28 | 11544499 | 2 | 302 | G:0.807947    | GCT:0.192053      |
| chr28 | 11544581 | 2 | 294 | G:0.77551     | A:0.22449         |
| chr28 | 11544714 | 2 | 296 | T:0.175676    | TG:0.824324       |
| chr28 | 11544717 | 2 | 298 | A:0.949664    | G:0.0503356       |
| chr28 | 11544799 | 2 | 296 | G:0.402027    | T:0.597973        |
| chr28 | 11544827 | 2 | 294 | T:0.714286    | C:0.285714        |
| chr28 | 11544877 | 2 | 296 | GTGT:0.949324 | G:0.0506757       |
| chr28 | 11544883 | 2 | 276 | GT:0.771739   | G:0.228261        |
| chr28 | 11544890 | 2 | 296 | G:0.949324    | GC:0.0506757      |
| chr28 | 11544914 | 2 | 292 | T:0.496575    | C:0.503425        |
| chr28 | 11544988 | 2 | 302 | C:0.36755     | T:0.63245         |
| chr28 | 11545100 | 2 | 290 | G:0.937931    | GC:0.062069       |
| chr28 | 11545302 | 2 | 298 | C:0.983221    | T:0.0167785       |
| chr28 | 11545375 | 2 | 288 | A:0.940972    | G:0.0590278       |
| chr28 | 11545391 | 2 | 282 | A:0.72695     | C:0.27305         |
| chr28 | 11545565 | 2 | 274 | G:0.405109    | T:0.594891        |
| chr28 | 11545679 | 2 | 268 | T:0.988806    | C:0.011194        |
| chr28 | 11545691 | 2 | 260 | T:0.742308    | TG:0.257692       |
| chr28 | 11545745 | 2 | 290 | C:0.924138    | CCTGCTT:0.0758621 |
| chr28 | 11545856 | 2 | 276 | G:0.387681    | C:0.612319        |
| chr28 | 11545895 | 2 | 274 | A:0.386861    | G:0.613139        |

|              |          |   |     |              |              |
|--------------|----------|---|-----|--------------|--------------|
| chr28        | 11545936 | 2 | 290 | G:0.365517   | T:0.634483   |
| chr28        | 11545944 | 2 | 290 | T:0.365517   | C:0.634483   |
| chr28        | 11546339 | 2 | 292 | C:0.506849   | G:0.493151   |
| chr28        | 11546711 | 2 | 294 | T:0          | C:1          |
| chr28        | 11547246 | 2 | 300 | C:0.586667   | T:0.413333   |
| chr28        | 11547749 | 2 | 296 | T:0.564189   | C:0.435811   |
| chr28        | 11547825 | 2 | 300 | G:0.58       | A:0.42       |
| chr28        | 11547909 | 2 | 292 | A:0.568493   | G:0.431507   |
| chr28        | 11547965 | 2 | 294 | G:0.57483    | A:0.42517    |
| chr28        | 11548201 | 2 | 278 | GGC:0.611511 | G:0.388489   |
| chr28        | 11548684 | 2 | 300 | A:0.6        | C:0.4        |
| chr28        | 11548728 | 2 | 296 | G:0.560811   | A:0.439189   |
| chr28        | 11548790 | 2 | 302 | T:0.798013   | C:0.201987   |
| chr28        | 11548905 | 2 | 302 | T:0.582781   | C:0.417219   |
| chr28        | 11549158 | 2 | 290 | C:0.67931    | T:0.32069    |
| chr28        | 11549225 | 2 | 298 | G:0.815436   | C:0.184564   |
| chr28        | 11549422 | 2 | 296 | G:0.972973   | A:0.027027   |
| chr28        | 11549854 | 2 | 298 | GC:0.536913  | G:0.463087   |
| chr28        | 11549886 | 2 | 292 | A:0.315068   | C:0.684932   |
| chr28        | 11550451 | 2 | 300 | G:0.506667   | T:0.493333   |
| chr28        | 11550453 | 2 | 300 | C:0.506667   | T:0.493333   |
| chr28        | 11550474 | 2 | 300 | C:0.6        | T:0.4        |
| chr28        | 11550527 | 2 | 302 | T:0.327815   | C:0.672185   |
| chr28        | 11550532 | 2 | 300 | A:0.536667   | G:0.463333   |
| chr28        | 11550589 | 2 | 280 | G:0.517857   | GA:0.482143  |
| chr28        | 11551403 | 2 | 312 | T:0.913462   | C:0.0865385  |
| chr28        | 11551428 | 2 | 304 | G:0.782895   | A:0.217105   |
| chr28        | 11551678 | 2 | 314 | C:0.503185   | A:0.496815   |
| chr28        | 11551766 | 2 | 300 | A:0.796667   | G:0.203333   |
| chr28        | 11552315 | 2 | 302 | C:0.811258   | T:0.188742   |
| chr28        | 11552628 | 2 | 308 | G:0.769481   | C:0.230519   |
| chr28        | 11552797 | 2 | 294 | A:0.309524   | G:0.690476   |
| chr28        | 11552898 | 2 | 306 | G:0.764706   | A:0.235294   |
| chr28        | 11552956 | 2 | 304 | C:0.973684   | T:0.0263158  |
| chr28        | 11553028 | 2 | 292 | C:0.80137    | T:0.19863    |
| chr28        | 11553058 | 2 | 298 | C:0.996644   | A:0.0033557  |
| chr28        | 11553744 | 2 | 134 | G:0.432836   | A:0.567164   |
| chr28        | 11553875 | 2 | 216 | A:0.166667   | C:0.833333   |
| chr28        | 11554042 | 2 | 264 | G:0.378788   | A:0.621212   |
| chr28        | 11554074 | 2 | 278 | C:0.805755   | T:0.194245   |
| chr28        | 11554165 | 2 | 292 | G:0.972603   | T:0.0273973  |
| chr28        | 11554424 | 2 | 296 | T:0.793919   | C:0.206081   |
| chr28        | 11554540 | 2 | 304 | G:0.786184   | A:0.213816   |
| chr28        | 11554663 | 3 | 292 | AC:0.195205  | A:0.640411   |
| ACC:0.164384 |          |   |     |              |              |
| chr28        | 11555304 | 2 | 302 | A:0.990066   | C:0.00993377 |
| chr28        | 11555340 | 2 | 302 | C:0.798013   | A:0.201987   |
| chr28        | 11555434 | 2 | 296 | A:0.182432   | G:0.817568   |
| chr28        | 11555462 | 2 | 286 | A:0.839161   | AC:0.160839  |
| chr28        | 11555463 | 2 | 286 | G:0.167832   | C:0.832168   |
| chr28        | 11555641 | 2 | 294 | C:0.785714   | T:0.214286   |
| chr28        | 11556141 | 2 | 280 | G:0.803571   | A:0.196429   |
| chr28        | 11556147 | 2 | 278 | C:0.866906   | T:0.133094   |
| chr28        | 11556157 | 2 | 272 | C:0.952206   | T:0.0477941  |

|                                               |          |   |     |                        |              |
|-----------------------------------------------|----------|---|-----|------------------------|--------------|
| chr28                                         | 11556412 | 2 | 304 | C:0.388158             | G:0.611842   |
| chr28                                         | 11556493 | 2 | 308 | A:0.37987              | G:0.62013    |
| chr28                                         | 11556601 | 2 | 302 | G:0.523179             | A:0.476821   |
| chr28                                         | 11556642 | 2 | 294 | A:0.367347             | G:0.632653   |
| chr28                                         | 11556693 | 3 | 304 | TAC:0.361842           | T:0.213816   |
| TACACAC:0.424342                              |          |   |     |                        |              |
| chr28                                         | 11556796 | 2 | 302 | A:0.360927             | G:0.639073   |
| chr28                                         | 11557075 | 2 | 286 | A:0.153846             | G:0.846154   |
| chr28                                         | 11557107 | 2 | 294 | C:0.370748             | T:0.629252   |
| chr28                                         | 11557257 | 2 | 276 | TGG:0.282609           | T:0.717391   |
| chr28                                         | 11557409 | 2 | 304 | TCC:0.496711           | T:0.503289   |
| chr28                                         | 11557492 | 2 | 302 | C:0.791391             | T:0.208609   |
| chr28                                         | 11558629 | 2 | 302 | G:0.791391             | A:0.208609   |
| chr28                                         | 11558708 | 3 | 302 | TAA:0.178808           | T:0.218543   |
| TA:0.602649                                   |          |   |     |                        |              |
| chr28                                         | 11558881 | 2 | 296 | T:0.777027             | C:0.222973   |
| chr28                                         | 11558998 | 2 | 316 | C:0.987342             | A:0.0126582  |
| chr28                                         | 11559044 | 2 | 308 | T:0.873377             | C:0.126623   |
| chr28                                         | 11559049 | 2 | 306 | A:0.98366              | G:0.0163399  |
| chr28                                         | 11559113 | 2 | 298 | C:0.869128             | T:0.130872   |
| chr28                                         | 11559336 | 2 | 302 | G:0.857616             | A:0.142384   |
| chr28                                         | 11559370 | 2 | 302 | G:0.784768             | A:0.215232   |
| chr28                                         | 11559660 | 2 | 298 | G:0.506711             | A:0.493289   |
| chr28                                         | 11559680 | 2 | 306 | C:0.996732             | A:0.00326797 |
| chr28                                         | 11559789 | 2 | 310 | G:0.854839             | A:0.145161   |
| chr28                                         | 11560380 | 2 | 280 | G:0.975 GAA:0.025      |              |
| chr28                                         | 11560678 | 2 | 280 | T:0.917857             | C:0.0821429  |
| chr28                                         | 11560738 | 2 | 294 | C:0.911565             | T:0.0884354  |
| chr28                                         | 11560775 | 2 | 292 | G:0.90411              | A:0.0958904  |
| chr28                                         | 11560960 | 2 | 316 | ACAGGGTGACTTG:0.481013 | A:           |
| 0.518987                                      |          |   |     |                        |              |
| chr28                                         | 11561034 | 2 | 298 | T:0.513423             | C:0.486577   |
| chr28                                         | 11561179 | 2 | 298 | A:0.983221             | G:0.0167785  |
| chr28                                         | 11561313 | 2 | 318 | A:0.996855             |              |
| ATTTGTGTTGTGTTGTGTTGTATGCTTTATATGG:0.00314465 |          |   |     |                        |              |
| chr28                                         | 11561358 | 2 | 296 | T:0.47973              | C:0.52027    |
| chr28                                         | 11561433 | 2 | 316 | G:0.984177             | A:0.0158228  |
| chr28                                         | 11561807 | 2 | 306 | C:0.937908             | T:0.0620915  |
| chr28                                         | 11562183 | 2 | 302 | C:0.993377             | T:0.00662252 |
| chr28                                         | 11562308 | 2 | 296 | A:0.283784             | T:0.716216   |
| chr28                                         | 11562402 | 2 | 300 | G:0.82 A:0.18          |              |
| chr28                                         | 11562430 | 2 | 302 | C:0.956954             | T:0.0430464  |
| chr28                                         | 11562453 | 2 | 306 | G:0.869281             | A:0.130719   |
| chr28                                         | 11562652 | 2 | 300 | C:0.98 T:0.02          |              |
| chr28                                         | 11562724 | 2 | 314 | T:0.270701             | C:0.729299   |
| chr28                                         | 11562746 | 2 | 314 | A:0.270701             | G:0.729299   |
| chr28                                         | 11562877 | 2 | 314 | A:0.863057             | C:0.136943   |
| chr28                                         | 11562957 | 2 | 304 | G:0.279605             | A:0.720395   |
| chr28                                         | 11563024 | 2 | 296 | G:0.277027             | T:0.722973   |
| chr28                                         | 11563301 | 2 | 288 | T:0.28125              | C:0.71875    |
| chr28                                         | 11563332 | 2 | 298 | G:0.288591             | A:0.711409   |
| chr28                                         | 11563436 | 2 | 290 | T:0.172414             | C:0.827586   |
| chr28                                         | 11563631 | 2 | 296 | C:0.293919             | T:0.706081   |
| chr28                                         | 11564298 | 2 | 294 | C:0.319728             | T:0.680272   |

|       |          |   |     |                 |              |
|-------|----------|---|-----|-----------------|--------------|
| chr28 | 11564438 | 2 | 292 | G:0.174658      | GTC:0.825342 |
| chr28 | 11564743 | 2 | 302 | T:0.304636      | C:0.695364   |
| chr28 | 11564765 | 2 | 290 | C:0.289655      | A:0.710345   |
| chr28 | 11564817 | 2 | 280 | T:0.164286      | C:0.835714   |
| chr28 | 11564942 | 2 | 286 | CTCTCT:0.391608 | C:0.608392   |
| chr28 | 11564975 | 2 | 306 | TA:0.339869     | T:0.660131   |
| chr28 | 11564976 | 2 | 304 | A:0.973684      | T:0.0263158  |
| chr28 | 11564977 | 2 | 302 | A:0.943709      | T:0.0562914  |
| chr28 | 11564997 | 2 | 306 | T:0.339869      | C:0.660131   |
| chr28 | 11565006 | 2 | 302 | G:0.857616      | GA:0.142384  |
| chr28 | 11565038 | 2 | 314 | G:0.308917      | A:0.691083   |
| chr28 | 11565040 | 2 | 312 | TGTTA:0.955128  | T:0.0448718  |
| chr28 | 11565107 | 2 | 296 | A:0.179054      | C:0.820946   |
| chr28 | 11565280 | 2 | 308 | C:0.305195      | A:0.694805   |
| chr28 | 11565509 | 2 | 300 | G:0.976667      | A:0.0233333  |
| chr28 | 11565518 | 2 | 300 | C:0.566667      | T:0.433333   |
| chr28 | 11565525 | 2 | 304 | C:0.983553      | T:0.0164474  |
| chr28 | 11565938 | 2 | 300 | A:0.163333      | T:0.836667   |
| chr28 | 11566480 | 2 | 308 | C:0.172078      | A:0.827922   |
| chr28 | 11566746 | 2 | 308 | A:0.980519      | G:0.0194805  |
| chr28 | 11567133 | 2 | 296 | A:0.168919      | G:0.831081   |
| chr28 | 11567398 | 2 | 312 | C:0.192308      | G:0.807692   |
| chr28 | 11567410 | 2 | 312 | T:0.192308      | A:0.807692   |
| chr28 | 11567464 | 2 | 310 | G:0.187097      | C:0.812903   |
| chr28 | 11567663 | 2 | 310 | A:0.996774      | G:0.00322581 |
| chr28 | 11567932 | 2 | 310 | A:0.158065      | G:0.841935   |
| chr28 | 11568038 | 2 | 310 | T:0.190323      | C:0.809677   |
| chr28 | 11568052 | 2 | 302 | T:0.195364      | C:0.804636   |
| chr28 | 11568086 | 2 | 294 | T:0.163265      | C:0.836735   |
| chr28 | 11568578 | 2 | 296 | T:0.185811      | C:0.814189   |
| chr28 | 11568998 | 2 | 290 | C:0.741379      | A:0.258621   |
| chr28 | 11569485 | 2 | 272 | A:0.974265      | AC:0.0257353 |
| chr28 | 11569547 | 2 | 298 | G:0.16443       | A:0.83557    |
| chr28 | 11569937 | 2 | 302 | G:0.983444      | A:0.0165563  |
| chr28 | 11570207 | 2 | 308 | G:0.175325      | GA:0.824675  |
| chr28 | 11570420 | 2 | 296 | T:0.182432      | C:0.817568   |
| chr28 | 11570482 | 2 | 308 | TC:0.977273     | T:0.0227273  |
| chr28 | 11571261 | 2 | 278 | A:0.507194      | T:0.492806   |
| chr28 | 11571394 | 2 | 292 | G:0.804795      | C:0.195205   |
| chr28 | 11571395 | 2 | 292 | G:0.804795      | T:0.195205   |
| chr28 | 11571515 | 2 | 298 | C:0             | CT:1         |
| chr28 | 11571579 | 2 | 304 | C:0             | A:1          |
| chr28 | 11571582 | 2 | 304 | T:0             | A:1          |
| chr28 | 11571583 | 2 | 304 | G:0             | A:1          |
| chr28 | 11571586 | 2 | 304 | G:0             | A:1          |
| chr28 | 11571687 | 2 | 246 | C:0.918699      | T:0.0813008  |
| chr28 | 11571773 | 2 | 240 | CCA:0.679167    | C:0.320833   |
| chr28 | 11571812 | 2 | 226 | T:0.831858      | G:0.168142   |
| chr28 | 11572221 | 2 | 90  | A:0.411111      | G:0.588889   |
| chr28 | 11572368 | 2 | 210 | G:0.67619       | T:0.32381    |
| chr28 | 11572559 | 2 | 280 | T:0.475         | C:0.525      |
| chr28 | 11572602 | 2 | 232 | A:0.599138      | T:0.400862   |
| chr28 | 11572697 | 2 | 192 | G:0.578125      | A:0.421875   |
| chr28 | 11572722 | 2 | 214 | G:0.906542      | A:0.0934579  |

|       |            |     |                                 |                             |
|-------|------------|-----|---------------------------------|-----------------------------|
| chr28 | 11572829 2 | 160 | A:0.475 T:0.525                 |                             |
| chr28 | 11573250 2 | 282 | T:0.588652                      | C:0.411348                  |
| chr28 | 11573328 2 | 282 | G:0.975177                      | A:0.0248227                 |
| chr28 | 11573350 2 | 296 | A:0 T:1                         |                             |
| chr28 | 11573351 2 | 296 | A:0 T:1                         |                             |
| chr28 | 11573352 2 | 296 | A:0 T:1                         |                             |
| chr28 | 11573392 2 | 304 | A:0.00657895                    | AT:0.993421                 |
| chr28 | 11573397 2 | 304 | A:0.00657895                    | AT:0.993421                 |
| chr28 | 11573680 2 | 306 | T:0.571895                      | C:0.428105                  |
| chr28 | 11573861 2 | 304 | A:0.605263                      | G:0.394737                  |
| chr28 | 11573910 2 | 306 | A:0.604575                      | G:0.395425                  |
| chr28 | 11573959 2 | 306 | A:0.98366                       | C:0.0163399                 |
| chr28 | 11574101 2 | 318 | TTTTCTTTCTTTC:0.597484          | T:                          |
|       | 0.402516   |     |                                 |                             |
| chr28 | 11574186 4 | 320 | CTTCCTTTTCCTTTTCCTTTTCCTTTTCCT: |                             |
|       | 0.215625   |     | C:0.3375 CTTTCCTTTTCCT:0.2      | CTTCCTTTTCCTTTTCCT:0.246875 |
| chr28 | 11574601 2 | 312 | C:0.214744                      | CAAAT:0.785256              |
| chr28 | 11574693 2 | 302 | T:0.612583                      | G:0.387417                  |
| chr28 | 11574809 2 | 300 | C:0.516667                      | CT:0.483333                 |
| chr28 | 11574818 2 | 302 | A:0.615894                      | T:0.384106                  |
| chr28 | 11575729 2 | 292 | AG:0.708904                     | A:0.291096                  |
| chr28 | 11576021 2 | 306 | G:0.996732                      | A:0.00326797                |
| chr28 | 11576230 2 | 312 | A:0.198718                      | T:0.801282                  |
| chr28 | 11576419 2 | 308 | T:0.224026                      | TG:0.775974                 |
| chr28 | 11576643 2 | 310 | CAAACAA:0.887097                | C:0.112903                  |
| chr28 | 11576716 2 | 300 | GTA:0.18 G:0.82                 |                             |
| chr28 | 11576738 2 | 304 | T:0.815789                      | A:0.184211                  |
| chr28 | 11576853 2 | 294 | G:0.391156                      | C:0.608844                  |
| chr28 | 11576869 2 | 296 | C:0.847973                      | T:0.152027                  |
| chr28 | 11577188 2 | 218 | CCT:0.334862                    | C:0.665138                  |
| chr28 | 11577216 2 | 232 | A:0.87931                       | AT:0.12069                  |
| chr28 | 11577346 2 | 304 | G:0.203947                      | A:0.796053                  |
| chr28 | 11577432 2 | 312 | G:0.810897                      | A:0.189103                  |
| chr28 | 11577541 2 | 314 | C:0.808917                      | T:0.191083                  |
| chr28 | 11577594 2 | 308 | A:0.980519                      | G:0.0194805                 |
| chr28 | 11577789 2 | 300 | C:0.35 A:0.65                   |                             |
| chr28 | 11577927 2 | 302 | T:0.172185                      | TAA:0.827815                |
| chr28 | 11577973 2 | 304 | T:0.161184                      | C:0.838816                  |
| chr28 | 11578112 2 | 292 | C:0.10274                       | T:0.89726                   |
| chr28 | 11578215 2 | 286 | A:0.216783                      | C:0.783217                  |
| chr28 | 11578269 2 | 78  | C:0.923077                      | A:0.0769231                 |
| chr28 | 11578484 2 | 278 | G:0.791367                      | A:0.208633                  |
| chr28 | 11578533 2 | 296 | C:0.905405                      | T:0.0945946                 |
| chr28 | 11578564 2 | 286 | C:0.216783                      | A:0.783217                  |
| chr28 | 11578718 2 | 296 | C:0.402027                      | T:0.597973                  |
| chr28 | 11578778 2 | 290 | TAC:0.503448                    | T:0.496552                  |
| chr28 | 11578794 2 | 290 | G:0.17931                       | A:0.82069                   |
| chr28 | 11578798 2 | 282 | A:0.890071                      | ATG:0.109929                |
| chr28 | 11578865 2 | 298 | A:0.47651                       | T:0.52349                   |
| chr28 | 11578932 2 | 290 | A:0.2 G:0.8                     |                             |
| chr28 | 11578956 2 | 286 | C:0.531469                      | A:0.468531                  |
| chr28 | 11579440 2 | 310 | G:0.193548                      | A:0.806452                  |
| chr28 | 11579558 2 | 308 | T:0.350649                      | C:0.649351                  |
| chr28 | 11580025 2 | 308 | G:0.977273                      | A:0.0227273                 |

|              |          |   |     |              |              |
|--------------|----------|---|-----|--------------|--------------|
| chr28        | 11580346 | 2 | 310 | C:0.312903   | T:0.687097   |
| chr28        | 11580885 | 2 | 302 | G:0.34106    | T:0.65894    |
| chr28        | 11581125 | 2 | 298 | G:0.895973   | A:0.104027   |
| chr28        | 11581162 | 2 | 288 | G:0.965278   | A:0.0347222  |
| chr28        | 11581232 | 2 | 294 | G:0.904762   | A:0.0952381  |
| chr28        | 11581388 | 2 | 304 | T:0.190789   | G:0.809211   |
| chr28        | 11581861 | 2 | 296 | G:0.192568   | A:0.807432   |
| chr28        | 11581981 | 2 | 314 | T:0.872611   | C:0.127389   |
| chr28        | 11582049 | 2 | 304 | T:0.901316   | A:0.0986842  |
| chr28        | 11582340 | 2 | 274 | G:0.879562   | A:0.120438   |
| chr28        | 11582811 | 2 | 272 | C:0.900735   | T:0.0992647  |
| chr28        | 11582964 | 2 | 296 | A:0.976351   | C:0.0236486  |
| chr28        | 11583458 | 2 | 270 | AC:0.718519  | A:0.281481   |
| chr28        | 11583596 | 2 | 296 | C:0.496622   | T:0.503378   |
| chr28        | 11583717 | 2 | 302 | C:0.195364   | A:0.804636   |
| chr28        | 11583875 | 2 | 304 | G:0.904605   | A:0.0953947  |
| chr28        | 11583892 | 2 | 308 | G:0.188312   | A:0.811688   |
| chr28        | 11584035 | 2 | 306 | T:0.986928   | C:0.0130719  |
| chr28        | 11584058 | 2 | 294 | T:0.982993   | G:0.0170068  |
| chr28        | 11584794 | 2 | 294 | CT:0.772109  | C:0.227891   |
| chr28        | 11585232 | 2 | 300 | A:0.896667   | G:0.103333   |
| chr28        | 11585430 | 2 | 296 | A:0.459459   | G:0.540541   |
| chr28        | 11585454 | 2 | 304 | G:0.980263   | C:0.0197368  |
| chr28        | 11585532 | 2 | 308 | A:0.967532   | C:0.0324675  |
| chr28        | 11585712 | 2 | 294 | C:0.462585   | T:0.537415   |
| chr28        | 11585736 | 2 | 298 | G:0.97651    | A:0.0234899  |
| chr28        | 11587009 | 2 | 306 | C:0.918301   | T:0.0816993  |
| chr28        | 11587232 | 2 | 282 | TGA:0.187943 | T:0.812057   |
| chr28        | 11587312 | 2 | 288 | G:0.440972   | A:0.559028   |
| chr28        | 11587332 | 2 | 282 | G:0.971631   | A:0.0283688  |
| chr28        | 11587641 | 2 | 294 | G:0.986395   | A:0.0136054  |
| chr28        | 11587651 | 2 | 292 | A:0.438356   | G:0.561644   |
| chr28        | 11588148 | 2 | 308 | A:0.412338   | G:0.587662   |
| chr28        | 11588471 | 3 | 296 | CT:0.638514  | C:0.185811   |
| CTT:0.175676 |          |   |     |              |              |
| chr28        | 11588601 | 2 | 294 | T:0.176871   | C:0.823129   |
| chr28        | 11588763 | 2 | 310 | C:0.974194   | T:0.0258065  |
| chr28        | 11589217 | 2 | 306 | C:0.496732   | T:0.503268   |
| chr28        | 11589258 | 2 | 310 | T:0.703226   | C:0.296774   |
| chr28        | 11589596 | 2 | 302 | G:0.993377   | A:0.00662252 |
| chr28        | 11589598 | 2 | 302 | C:0.493377   | T:0.506623   |
| chr28        | 11590069 | 2 | 290 | T:0.848276   | C:0.151724   |
| chr28        | 11590104 | 2 | 278 | C:0.985612   | T:0.0143885  |
| chr28        | 11590299 | 2 | 298 | C:0.503356   | A:0.496644   |
| chr28        | 11590481 | 2 | 302 | A:0.860927   | G:0.139073   |
| chr28        | 11590817 | 2 | 294 | G:0.312925   | A:0.687075   |
| chr28        | 11590925 | 2 | 302 | T:0.168874   | C:0.831126   |
| chr28        | 11591042 | 2 | 304 | T:0.861842   | C:0.138158   |
| chr28        | 11591043 | 2 | 304 | G:0.861842   | T:0.138158   |
| chr28        | 11591057 | 2 | 304 | A:0.871711   | T:0.128289   |
| chr28        | 11591069 | 2 | 306 | T:0.849673   | C:0.150327   |
| chr28        | 11591173 | 2 | 308 | G:0.983766   | A:0.0162338  |
| chr28        | 11591421 | 2 | 298 | T:0.986577   | TG:0.0134228 |
| chr28        | 11591717 | 2 | 302 | C:0.97351    | T:0.0264901  |

|                          |          |   |     |                        |                 |
|--------------------------|----------|---|-----|------------------------|-----------------|
| chr28                    | 11591970 | 2 | 294 | G:0.435374             | T:0.564626      |
| chr28                    | 11592040 | 2 | 290 | T:0.813793             | G:0.186207      |
| chr28                    | 11592531 | 2 | 304 | A:0.980263             | G:0.0197368     |
| chr28                    | 11592748 | 2 | 296 | T:0.976351             | G:0.0236486     |
| chr28                    | 11592995 | 2 | 264 | G:0.92803              | C:0.0719697     |
| chr28                    | 11593095 | 2 | 202 | A:0.445545             | G:0.554455      |
| chr28                    | 11593209 | 2 | 156 | G:0.782051             | A:0.217949      |
| chr28                    | 11593286 | 2 | 178 | GTGCGGC:0.522472       | G:0.477528      |
| chr28                    | 11593315 | 2 | 214 | CGGGCCA:0.995327       | C:0.0046729     |
| chr28                    | 11593329 | 2 | 236 | GGCCAGGGCCAGC:0.741525 | G:              |
| 0.258475                 |          |   |     |                        |                 |
| chr28                    | 11593513 | 2 | 278 | C:0.241007             | CG:0.758993     |
| chr28                    | 11593558 | 2 | 284 | C:0.725352             | T:0.274648      |
| chr28                    | 11594256 | 2 | 304 | C:0.983553             | CCCCT:0.0164474 |
| chr28                    | 11594264 | 2 | 296 | T:0.310811             | TC:0.689189     |
| chr28                    | 11594265 | 3 | 302 | T:0.294702             | TC:0.317881     |
| TCTC:0.387417            |          |   |     |                        |                 |
| chr28                    | 11594286 | 2 | 296 | AT:0.881757            | A:0.118243      |
| chr28                    | 11594291 | 2 | 296 | T:0.658784             | A:0.341216      |
| chr28                    | 11594296 | 2 | 296 | T:0.881757             | A:0.118243      |
| chr28                    | 11594297 | 4 | 306 | TA:0.418301            | T:0.281046      |
| AA:0.189542 TAA:0.111111 |          |   |     |                        |                 |
| chr28                    | 11594331 | 2 | 310 | C:0.925806             | T:0.0741935     |
| chr28                    | 11594374 | 2 | 310 | G:0.754839             | A:0.245161      |
| chr28                    | 11594483 | 2 | 302 | T:0.470199             | G:0.529801      |
| chr28                    | 11594670 | 2 | 310 | G:0.780645             | T:0.219355      |
| chr28                    | 11594671 | 2 | 310 | T:0.780645             | C:0.219355      |
| chr28                    | 11594796 | 2 | 310 | A:0.519355             | G:0.480645      |
| chr28                    | 11594872 | 2 | 314 | C:0.703822             | T:0.296178      |
| chr28                    | 11594893 | 2 | 312 | C:0.50641              | CAGAA:0.49359   |
| chr28                    | 11595014 | 2 | 302 | A:0.509934             | G:0.490066      |
| chr28                    | 11595259 | 2 | 302 | A:0.509934             | T:0.490066      |
| chr28                    | 11595360 | 2 | 290 | C:0.831034             | T:0.168966      |
| chr28                    | 11595626 | 2 | 304 | C:0.509868             | T:0.490132      |
| chr28                    | 11595862 | 2 | 302 | G:0.662252             | T:0.337748      |
| chr28                    | 11595870 | 2 | 304 | C:0.825658             | T:0.174342      |
| chr28                    | 11595883 | 2 | 300 | T:0.826667             | C:0.173333      |
| chr28                    | 11596094 | 2 | 306 | T:0.777778             | C:0.222222      |
| chr28                    | 11596296 | 2 | 308 | G:0.977273             | A:0.0227273     |
| chr28                    | 11596429 | 2 | 314 | T:0.254777             | C:0.745223      |
| chr28                    | 11596526 | 2 | 302 | A:0.788079             | G:0.211921      |
| chr28                    | 11596568 | 2 | 290 | T:0.786207             | A:0.213793      |
| chr28                    | 11596570 | 2 | 292 | C:0.989726             | T:0.010274      |
| chr28                    | 11596721 | 2 | 298 | G:0.483221             | C:0.516779      |
| chr28                    | 11596765 | 3 | 306 | GTT:0.48366            | G:0.24183       |
| GT:0.27451               |          |   |     |                        |                 |
| chr28                    | 11596776 | 2 | 306 | TTTTTTG:0.75817        | T:0.24183       |
| chr28                    | 11596779 | 2 | 304 | TTTG:0.976974          | T:0.0230263     |
| chr28                    | 11596782 | 2 | 308 | G:0.811688             | T:0.188312      |
| chr28                    | 11596785 | 2 | 308 | T:0.811688             | G:0.188312      |
| chr28                    | 11596787 | 2 | 304 | T:0.723684             | G:0.276316      |
| chr28                    | 11596788 | 2 | 304 | TG:0.723684            | T:0.276316      |
| chr28                    | 11596789 | 3 | 310 | GTT:0.577419           | G:0.23871       |
| TTT:0.183871             |          |   |     |                        |                 |

|                                            |          |   |     |                      |               |
|--------------------------------------------|----------|---|-----|----------------------|---------------|
| chr28                                      | 11596794 | 2 | 304 | T:0.976974           | TG:0.0230263  |
| chr28                                      | 11596927 | 2 | 302 | T:0.721854           | A:0.278146    |
| chr28                                      | 11597021 | 3 | 290 | C:0.296552           | CT:0.441379   |
| CTT:0.262069                               |          |   |     |                      |               |
| chr28                                      | 11597352 | 2 | 308 | C:0.720779           | T:0.279221    |
| chr28                                      | 11597367 | 2 | 304 | G:0.473684           | T:0.526316    |
| chr28                                      | 11597372 | 2 | 308 | G:0.720779           | A:0.279221    |
| chr28                                      | 11597823 | 2 | 298 | C:0.771812           | T:0.228188    |
| chr28                                      | 11598185 | 4 | 304 | CT:0.411184          | C:0.148026    |
| CTT:0.138158 CTTT:0.302632                 |          |   |     |                      |               |
| chr28                                      | 11598207 | 2 | 304 | A:0.700658           | T:0.299342    |
| chr28                                      | 11598277 | 2 | 296 | G:0.760135           | A:0.239865    |
| chr28                                      | 11598278 | 2 | 296 | A:0.760135           | T:0.239865    |
| chr28                                      | 11598332 | 2 | 294 | G:0.751701           | GGAT:0.248299 |
| chr28                                      | 11598335 | 2 | 294 | C:0.751701           | T:0.248299    |
| chr28                                      | 11598396 | 2 | 268 | C:0.75 CT:0.25       |               |
| chr28                                      | 11598404 | 2 | 272 | C:0.253676           | T:0.746324    |
| chr28                                      | 11598484 | 2 | 306 | G:0.771242           | T:0.228758    |
| chr28                                      | 11598559 | 2 | 310 | A:0.974194           | G:0.0258065   |
| chr28                                      | 11598737 | 2 | 300 | C:0.883333           | CA:0.116667   |
| chr28                                      | 11598800 | 4 | 306 | CTT:0.287582         | C:0.222222    |
| CT:0.245098 CTTT:0.245098                  |          |   |     |                      |               |
| chr28                                      | 11598860 | 2 | 306 | C:0.294118           | T:0.705882    |
| chr28                                      | 11599091 | 2 | 300 | T:0.72 G:0.28        |               |
| chr28                                      | 11599188 | 2 | 304 | C:0.986842           | A:0.0131579   |
| chr28                                      | 11599223 | 2 | 310 | A:0.73871            | C:0.26129     |
| chr28                                      | 11599278 | 2 | 308 | A:0.834416           | C:0.165584    |
| chr28                                      | 11599456 | 2 | 308 | T:0.272727           | C:0.727273    |
| chr28                                      | 11599457 | 2 | 312 | G:0.766026           | A:0.233974    |
| chr28                                      | 11599776 | 2 | 308 | T:0.967532           | G:0.0324675   |
| chr28                                      | 11599802 | 2 | 302 | T:0.794702           | A:0.205298    |
| chr28                                      | 11599821 | 2 | 304 | T:0.917763           | A:0.0822368   |
| chr28                                      | 11599924 | 2 | 304 | G:0.519737           | A:0.480263    |
| chr28                                      | 11600197 | 2 | 300 | GA:0.54 G:0.46       |               |
| chr28                                      | 11600932 | 2 | 306 | T:0.673203           | A:0.326797    |
| chr28                                      | 11601773 | 2 | 308 | A:0.935065           | C:0.0649351   |
| chr28                                      | 11601810 | 2 | 314 | G:0.550955           | A:0.449045    |
| chr28                                      | 11601818 | 2 | 314 | C:0.977707           | T:0.022293    |
| chr28                                      | 11601898 | 2 | 296 | C:0.814189           | G:0.185811    |
| chr28                                      | 11602097 | 2 | 304 | C:0.447368           | A:0.552632    |
| chr28                                      | 11602103 | 2 | 302 | T:0.897351           | G:0.102649    |
| chr28                                      | 11602416 | 2 | 304 | T:0.825658           | C:0.174342    |
| chr28                                      | 11602515 | 2 | 310 | T:0.825806           | C:0.174194    |
| chr28                                      | 11602545 | 2 | 310 | A:0.283871           | C:0.716129    |
| chr28                                      | 11602891 | 2 | 312 | C:0.826923           | T:0.173077    |
| chr28                                      | 11603063 | 2 | 314 | T:0.964968           | G:0.0350318   |
| chr28                                      | 11604252 | 2 | 304 | T:0.506579           | C:0.493421    |
| chr28                                      | 11604357 | 2 | 304 | A:0.990132           | T:0.00986842  |
| chr28                                      | 11604378 | 4 | 312 | TGAGAGAGAGA:0.391026 | T:            |
| 0.294872 TGAGA:0.205128 TGAGAGAGA:0.108974 |          |   |     |                      |               |
| chr28                                      | 11604394 | 2 | 304 | AG:0.825658          | A:0.174342    |
| chr28                                      | 11604396 | 2 | 304 | AGAGAGAG:0.825658    | A:            |
| 0.174342                                   |          |   |     |                      |               |
| chr28                                      | 11604458 | 2 | 292 | C:0.493151           | G:0.506849    |



|                         |            |     |                                |              |
|-------------------------|------------|-----|--------------------------------|--------------|
| chr28                   | 11604478 2 | 296 | TG:0.712838                    | T:0.287162   |
| chr28                   | 11604541 2 | 302 | A:0.781457                     | T:0.218543   |
| chr28                   | 11604741 2 | 306 | C:0.986928                     | A:0.0130719  |
| chr28                   | 11604757 2 | 318 | ATGAAGAAATGGAGACTGTTT:0.679245 |              |
| A:0.320755              |            |     |                                |              |
| chr28                   | 11604949 2 | 310 | A:0.477419                     | G:0.522581   |
| chr28                   | 11604955 2 | 310 | A:0.974194                     | G:0.0258065  |
| chr28                   | 11605172 2 | 298 | T:0.738255                     | G:0.261745   |
| chr28                   | 11605576 2 | 304 | C:0.786184                     | T:0.213816   |
| chr28                   | 11605909 2 | 302 | C:0.890728                     | T:0.109272   |
| chr28                   | 11606073 2 | 292 | A:0.636986                     | G:0.363014   |
| chr28                   | 11606519 2 | 284 | A:0.788732                     | G:0.211268   |
| chr28                   | 11606879 2 | 306 | CA:0.977124                    | C:0.0228758  |
| chr28                   | 11606945 2 | 308 | T:0.603896                     | A:0.396104   |
| chr28                   | 11607011 2 | 300 | A:0.94                         | G:0.06       |
| chr28                   | 11607897 2 | 312 | C:0.429487                     | T:0.570513   |
| chr28                   | 11608033 2 | 292 | G:0.804795                     | A:0.195205   |
| chr28                   | 11608180 3 | 310 | TAAACAAAC:0.435484             | T:           |
| 0.319355 TAAAC:0.245161 |            |     |                                |              |
| chr28                   | 11608898 2 | 312 | A:0.394231                     | G:0.605769   |
| chr28                   | 11608945 2 | 320 | G:0.4125                       | C:0.5875     |
| chr28                   | 11609061 2 | 304 | T:0.786184                     | C:0.213816   |
| chr28                   | 11609073 2 | 306 | A:0.395425                     | T:0.604575   |
| chr28                   | 11609146 2 | 304 | T:0.398026                     | C:0.601974   |
| chr28                   | 11609265 2 | 302 | T:0.410596                     | C:0.589404   |
| chr28                   | 11609484 2 | 276 | C:0.938406                     | T:0.0615942  |
| chr28                   | 11609564 2 | 274 | G:0.510949                     | A:0.489051   |
| chr28                   | 11609578 2 | 276 | C:0.815217                     | T:0.184783   |
| chr28                   | 11609722 2 | 282 | T:0.822695                     | G:0.177305   |
| chr28                   | 11609723 2 | 284 | A:0.419014                     | C:0.580986   |
| chr28                   | 11609803 2 | 284 | A:0.975352                     | T:0.0246479  |
| chr28                   | 11609990 2 | 302 | C:0.42053                      | A:0.57947    |
| chr28                   | 11610409 2 | 294 | G:0.806122                     | A:0.193878   |
| chr28                   | 11610793 2 | 302 | TCAG:0.791391                  | T:0.208609   |
| chr28                   | 11611072 2 | 306 | T:0.611111                     | C:0.388889   |
| chr28                   | 11611102 2 | 292 | T:0.633562                     | C:0.366438   |
| chr28                   | 11611344 2 | 304 | T:0.983553                     | C:0.0164474  |
| chr28                   | 11611618 2 | 300 | C:0.63                         | G:0.37       |
| chr28                   | 11611687 2 | 306 | C:0.611111                     | T:0.388889   |
| chr28                   | 11611791 2 | 306 | G:0.973856                     | A:0.0261438  |
| chr28                   | 11611845 2 | 302 | A:0.619205                     | T:0.380795   |
| chr28                   | 11611994 2 | 310 | G:0.848387                     | A:0.151613   |
| chr28                   | 11612122 2 | 308 | T:0.642857                     | C:0.357143   |
| chr28                   | 11612128 2 | 308 | A:0.892857                     | C:0.107143   |
| chr28                   | 11612184 2 | 298 | G:0.90604                      | A:0.0939597  |
| chr28                   | 11612734 2 | 300 | C:0.89                         | T:0.11       |
| chr28                   | 11612749 2 | 306 | G:0.911765                     | C:0.0882353  |
| chr28                   | 11613175 2 | 314 | G:0.875796                     | A:0.124204   |
| chr28                   | 11613346 2 | 300 | C:0.963333                     | T:0.0366667  |
| chr28                   | 11613350 2 | 300 | G:0.963333                     | T:0.0366667  |
| chr28                   | 11613641 2 | 310 | C:0.993548                     | A:0.00645161 |
| chr28                   | 11613768 2 | 286 | C:0.986014                     | T:0.013986   |
| chr28                   | 11613900 2 | 314 | G:0.987261                     | A:0.0127389  |
| chr28                   | 11614047 2 | 304 | T:0.993421                     | C:0.00657895 |

|                                           |          |   |     |                |              |
|-------------------------------------------|----------|---|-----|----------------|--------------|
| chr28                                     | 11614242 | 2 | 304 | G:0.394737     | A:0.605263   |
| chr28                                     | 11614331 | 2 | 300 | C:0.833333     | T:0.166667   |
| chr28                                     | 11614549 | 2 | 316 | C:0.825949     | T:0.174051   |
| chr28                                     | 11614894 | 2 | 306 | A:0.826797     | G:0.173203   |
| chr28                                     | 11615171 | 2 | 314 | G:0.821656     | T:0.178344   |
| chr28                                     | 11615352 | 2 | 306 | T:0.810458     | TA:0.189542  |
| chr28                                     | 11615568 | 2 | 298 | C:0.815436     | A:0.184564   |
| chr28                                     | 11615826 | 2 | 300 | G:0.93         | A:0.07       |
| chr28                                     | 11615868 | 2 | 302 | CTA:0.817881   | C:0.182119   |
| chr28                                     | 11615952 | 2 | 318 | ATTTTT:0.77673 | A:0.22327    |
| chr28                                     | 11615953 | 2 | 308 |                |              |
| TTTTTTTTTTTTTTTTTTTTTTTTTTTTTTGGTATTTGAA: |          |   |     | 0.935065       | T:0.0649351  |
| chr28                                     | 11616070 | 2 | 300 | C:0.976667     | CT:0.0233333 |
| chr28                                     | 11616117 | 2 | 302 | CT:0.798013    | C:0.201987   |
| chr28                                     | 11616268 | 2 | 298 | C:0.798658     | A:0.201342   |
| chr28                                     | 11616320 | 2 | 302 | G:0.811258     | T:0.188742   |
| chr28                                     | 11616406 | 2 | 302 | GTA:0.956954   | G:0.0430464  |
| chr28                                     | 11616536 | 2 | 298 | CA:0.798658    | C:0.201342   |
| chr28                                     | 11616567 | 2 | 290 | TC:0.882759    | T:0.117241   |
| chr28                                     | 11616568 | 2 | 292 | C:0.917808     | CT:0.0821918 |
| chr28                                     | 11616613 | 2 | 292 | A:0.934932     | C:0.0650685  |
| chr28                                     | 11616697 | 2 | 290 | G:0.186207     | A:0.813793   |
| chr28                                     | 11616963 | 2 | 308 | G:0.594156     | C:0.405844   |
| chr28                                     | 11617017 | 2 | 298 | T:0.802013     | C:0.197987   |
| chr28                                     | 11617076 | 2 | 302 | T:0.811258     | G:0.188742   |
| chr28                                     | 11617079 | 2 | 302 | C:0.933775     | T:0.0662252  |
| chr28                                     | 11617455 | 2 | 312 | G:0.820513     | A:0.179487   |
| chr28                                     | 11617492 | 2 | 306 | T:0.398693     | C:0.601307   |
| chr28                                     | 11617795 | 2 | 306 | A:0.993464     | G:0.00653595 |
| chr28                                     | 11618216 | 2 | 306 | AT:0.957516    | A:0.0424837  |
| chr28                                     | 11618267 | 2 | 304 | T:0.430921     | C:0.569079   |
| chr28                                     | 11618315 | 2 | 304 | G:0.832237     | A:0.167763   |
| chr28                                     | 11618439 | 2 | 272 | T:0.797794     | C:0.202206   |
| chr28                                     | 11618928 | 2 | 284 | GT:0.947183    | G:0.0528169  |
| chr28                                     | 11618960 | 2 | 288 | C:0.986111     | A:0.0138889  |
| chr28                                     | 11619029 | 2 | 310 | T:0.419355     | TG:0.580645  |
| chr28                                     | 11619034 | 2 | 310 | C:0.809677     | T:0.190323   |
| chr28                                     | 11619208 | 2 | 296 | G:0.986486     | C:0.0135135  |
| chr28                                     | 11619407 | 2 | 308 | A:0.954545     | T:0.0454545  |
| chr28                                     | 11619418 | 2 | 308 | A:0.811688     | G:0.188312   |
| chr28                                     | 11619623 | 2 | 306 | G:0.941176     | T:0.0588235  |
| chr28                                     | 11619624 | 2 | 306 | A:0.385621     | T:0.614379   |
| chr28                                     | 11619667 | 2 | 306 | C:0.986928     | T:0.0130719  |
| chr28                                     | 11619802 | 2 | 308 | T:0.808442     | A:0.191558   |
| chr28                                     | 11619807 | 2 | 308 | G:0.808442     | T:0.191558   |
| chr28                                     | 11620066 | 2 | 306 | G:0.941176     | A:0.0588235  |
| chr28                                     | 11620197 | 2 | 310 | G:0.958065     | A:0.0419355  |
| chr28                                     | 11620293 | 2 | 316 | TG:0.411392    | T:0.588608   |
| chr28                                     | 11620360 | 2 | 304 | C:0.990132     | T:0.00986842 |
| chr28                                     | 11620596 | 2 | 306 | G:0.852941     | A:0.147059   |
| chr28                                     | 11620674 | 2 | 318 | G:0.933962     | A:0.0660377  |
| chr28                                     | 11620751 | 2 | 306 | A:0.810458     | G:0.189542   |
| chr28                                     | 11620765 | 2 | 310 | C:0.935484     | T:0.0645161  |
| chr28                                     | 11620843 | 2 | 300 | A:0.953333     | G:0.0466667  |

|                                 |          |   |     |                                 |                |
|---------------------------------|----------|---|-----|---------------------------------|----------------|
| chr28                           | 11620896 | 2 | 308 | A:0.928571                      | C:0.0714286    |
| chr28                           | 11621240 | 2 | 302 | A:0.549669                      | T:0.450331     |
| chr28                           | 11621573 | 2 | 310 | G:0.867742                      | A:0.132258     |
| chr28                           | 11621624 | 2 | 306 | G:0.934641                      | A:0.0653595    |
| chr28                           | 11621742 | 2 | 302 | A:0.559603                      | G:0.440397     |
| chr28                           | 11621773 | 2 | 316 | T:0.933544                      | C:0.0664557    |
| chr28                           | 11621848 | 2 | 306 | G:0.862745                      | A:0.137255     |
| chr28                           | 11622244 | 2 | 306 | T:0.513072                      | A:0.486928     |
| chr28                           | 11623106 | 2 | 296 | A:0.597973                      | AATTT:0.402027 |
| chr28                           | 11623164 | 2 | 298 | C:0.674497                      | T:0.325503     |
| chr28                           | 11623166 | 2 | 298 | C:0.674497                      | T:0.325503     |
| chr28                           | 11623243 | 2 | 298 | T:0.667785                      | G:0.332215     |
| chr28                           | 11623314 | 2 | 300 | G:0.686667                      | A:0.313333     |
| chr28                           | 11623361 | 2 | 300 | C:0.676667                      | T:0.323333     |
| chr28                           | 11623373 | 2 | 298 | T:0.369128                      | C:0.630872     |
| chr28                           | 11623385 | 2 | 308 | G:0.795455                      | T:0.204545     |
| chr28                           | 11623406 | 2 | 304 | C:0.648026                      | T:0.351974     |
| chr28                           | 11623440 | 2 | 306 | T:0.993464                      | C:0.00653595   |
| chr28                           | 11623894 | 2 | 306 | C:0.986928                      | T:0.0130719    |
| chr28                           | 11624156 | 2 | 304 | C:0.940789                      | T:0.0592105    |
| chr28                           | 11624224 | 2 | 302 | T:0.768212                      | C:0.231788     |
| chr28                           | 11624878 | 2 | 308 | A:0.795455                      | T:0.204545     |
| chr28                           | 11625075 | 2 | 314 | C:0.382166                      | T:0.617834     |
| chr28                           | 11625161 | 2 | 302 | C:0.370861                      | T:0.629139     |
| chr28                           | 11625279 | 2 | 318 | T:0.603774                      | C:0.396226     |
| chr28                           | 11625400 | 2 | 306 | GTCAC:0.98366                   | G:0.0163399    |
| chr28                           | 11625617 | 2 | 312 | G:0.349359                      | A:0.650641     |
| chr28                           | 11625771 | 2 | 318 | G:0.361635                      | C:0.638365     |
| chr28                           | 11625905 | 3 | 304 | TC:0.381579                     | T:0.421053     |
| CC:0.197368                     |          |   |     |                                 |                |
| chr28                           | 11625915 | 2 | 304 | T:0.578947                      | C:0.421053     |
| chr28                           | 11625962 | 2 | 308 | G:0.37013                       | GTATT:0.62987  |
| chr28                           | 11626066 | 3 | 298 | CTGTGTG:0.486577                | C:0.432886     |
| CTGTG:0.0805369                 |          |   |     |                                 |                |
| chr28                           | 11626244 | 4 | 306 | CAG:0.473856                    | C:0.205882     |
| CAGAG:0.143791 CAGAGAG:0.176471 |          |   |     |                                 |                |
| chr28                           | 11626315 | 2 | 292 | G:0.80137                       | A:0.19863      |
| chr28                           | 11626402 | 2 | 298 | A:0.395973                      | G:0.604027     |
| chr28                           | 11626637 | 2 | 310 | C:0.587097                      | T:0.412903     |
| chr28                           | 11627103 | 2 | 306 | C:0.990196                      | T:0.00980392   |
| chr28                           | 11627334 | 2 | 308 | A:0.805195                      | G:0.194805     |
| chr28                           | 11627622 | 2 | 294 | TTC:0.982993                    | T:0.0170068    |
| chr28                           | 11627984 | 2 | 310 | T:0.941935                      | G:0.0580645    |
| chr28                           | 11628016 | 2 | 304 | A:0.776316                      | T:0.223684     |
| chr28                           | 11628478 | 2 | 308 | A:0.392857                      | G:0.607143     |
| chr28                           | 11628656 | 2 | 304 | G:0.944079                      | A:0.0559211    |
| chr28                           | 11628658 | 2 | 302 | G:0.980132                      | A:0.0198675    |
| chr28                           | 11628696 | 2 | 320 | CTTTATCATATTCTTTATTCTCT:0.78125 |                |
| C:0.21875                       |          |   |     |                                 |                |
| chr28                           | 11628917 | 2 | 282 | T:0.932624                      | A:0.0673759    |
| chr28                           | 11629114 | 2 | 300 | CTTTTTT:0.756667                | C:0.243333     |
| chr28                           | 11629359 | 2 | 308 | A:0.717532                      | G:0.282468     |
| chr28                           | 11629750 | 2 | 306 | T:0.937908                      | C:0.0620915    |
| chr28                           | 11629885 | 2 | 308 | G:0.951299                      | A:0.0487013    |

|                                                     |          |   |     |                             |                 |
|-----------------------------------------------------|----------|---|-----|-----------------------------|-----------------|
| chr28                                               | 11629911 | 2 | 298 | T:0.942953                  | C:0.057047      |
| chr28                                               | 11629947 | 2 | 308 | C:0.922078                  | T:0.0779221     |
| chr28                                               | 11630066 | 2 | 304 | T:0.934211                  | G:0.0657895     |
| chr28                                               | 11630218 | 2 | 308 | T:0.941558                  | C:0.0584416     |
| chr28                                               | 11630386 | 2 | 310 | A:0.429032                  | C:0.570968      |
| chr28                                               | 11630569 | 2 | 302 | A:0.718543                  | G:0.281457      |
| chr28                                               | 11630669 | 2 | 306 | G:0.434641                  | A:0.565359      |
| chr28                                               | 11630972 | 2 | 312 | C:0.772436                  | T:0.227564      |
| chr28                                               | 11631002 | 2 | 312 | C:0.807692                  | G:0.192308      |
| chr28                                               | 11631112 | 2 | 310 | G:0.929032                  | A:0.0709677     |
| chr28                                               | 11631274 | 2 | 310 | C:0.512903                  | T:0.487097      |
| chr28                                               | 11631806 | 2 | 290 | AT:0.589655                 | A:0.410345      |
| chr28                                               | 11631807 | 2 | 296 | T:0.834459                  | A:0.165541      |
| chr28                                               | 11631961 | 2 | 302 | AC:0.562914                 | A:0.437086      |
| chr28                                               | 11631997 | 2 | 294 | G:0.877551                  | T:0.122449      |
| chr28                                               | 11632048 | 2 | 298 | G:0.52349                   | A:0.47651       |
| chr28                                               | 11632389 | 2 | 310 | A:0.377419                  | G:0.622581      |
| chr28                                               | 11632448 | 2 | 308 | C:0.844156                  | G:0.155844      |
| chr28                                               | 11633018 | 2 | 306 | CA:0.529412                 | C:0.470588      |
| chr28                                               | 11633136 | 2 | 300 | T:0.36 TC:0.64              |                 |
| chr28                                               | 11633395 | 2 | 310 | C:0.990323                  | T:0.00967742    |
| chr28                                               | 11633438 | 2 | 296 | T:0.844595                  | C:0.155405      |
| chr28                                               | 11633629 | 2 | 298 | G:0.942953                  | A:0.057047      |
| chr28                                               | 11633883 | 2 | 298 | G:0.845638                  | A:0.154362      |
| chr28                                               | 11634053 | 2 | 302 | T:0.36755                   | C:0.63245       |
| chr28                                               | 11634287 | 2 | 296 | C:0.793919                  | T:0.206081      |
| chr28                                               | 11634408 | 2 | 304 | TGTAA:0.930921              | T:0.0690789     |
| chr28                                               | 11634473 | 2 | 306 | C:0.562092                  | A:0.437908      |
| chr28                                               | 11634938 | 2 | 320 | C:0.9875 CTTA:0.0125        |                 |
| chr28                                               | 11634941 | 2 | 320 | C:0.9875 G:0.0125           |                 |
| chr28                                               | 11634943 | 2 | 320 | A:0.9875 AGAACCTCT:0.0125   |                 |
| chr28                                               | 11634945 | 2 | 320 | A:0.9875 ATTGAAGAACC:0.0125 |                 |
| chr28                                               | 11635125 | 2 | 306 | GC:0.718954                 | G:0.281046      |
| chr28                                               | 11635128 | 2 | 306 | T:0.718954                  | G:0.281046      |
| chr28                                               | 11635701 | 2 | 302 | A:0.370861                  | G:0.629139      |
| chr28                                               | 11636000 | 2 | 262 | G:0.973282                  | A:0.0267176     |
| chr28                                               | 11636112 | 2 | 288 | T:0.652778                  | C:0.347222      |
| chr28                                               | 11636162 | 3 | 296 | G:0.773649                  | GAATA:0.0810811 |
| GAATAAATA:0.14527                                   |          |   |     |                             |                 |
| chr28                                               | 11636195 | 2 | 316 | A:0.943038                  |                 |
| AATACATAAATACATAAATAC:0.056962                      |          |   |     |                             |                 |
| chr28                                               | 11636202 | 2 | 312 | A:0.932692                  | AC:0.0673077    |
| chr28                                               | 11636203 | 6 | 318 | A:0.484277                  | AAAAAAAAT:      |
| 0.0220126 AATAAAAAT:0.147799 AATAAATAAAAAT:0.242138 |          |   |     |                             |                 |
| AATACATAAATAAATAAATAAAAAT:0.0377358                 |          |   |     |                             |                 |
| ATAAATACATAAATACATAAATAAATAAATAAAAAT:0.0660377      |          |   |     |                             |                 |
| chr28                                               | 11636449 | 2 | 304 | GCAA:0.944079               | G:0.0559211     |
| chr28                                               | 11636450 | 3 | 300 | CA:0.64 C:0.106667          | CAA:            |
| 0.253333                                            |          |   |     |                             |                 |
| chr28                                               | 11636585 | 2 | 298 | T:0.775168                  | C:0.224832      |
| chr28                                               | 11636666 | 2 | 306 | A:0.901961                  | C:0.0980392     |
| chr28                                               | 11636699 | 2 | 300 | C:0.79 T:0.21               |                 |
| chr28                                               | 11637097 | 2 | 262 | C:0.923664                  | T:0.0763359     |
| chr28                                               | 11637148 | 2 | 242 | TTC:0.85124                 | T:0.14876       |

|                                                                      |          |   |     |                              |                  |
|----------------------------------------------------------------------|----------|---|-----|------------------------------|------------------|
| chr28                                                                | 11637876 | 2 | 296 | A:0.912162                   | C:0.0878378      |
| chr28                                                                | 11638360 | 2 | 300 | T:0.88 C:0.12                |                  |
| chr28                                                                | 11638539 | 2 | 306 | T:0.996732                   | C:0.00326797     |
| chr28                                                                | 11638683 | 2 | 314 | C:0.382166                   | T:0.617834       |
| chr28                                                                | 11638838 | 2 | 300 | T:0.916667                   | G:0.0833333      |
| chr28                                                                | 11638897 | 2 | 306 | A:0.970588                   | AGC:0.0294118    |
| chr28                                                                | 11638902 | 3 | 306 | A:0.555556                   | ACG:0.415033     |
| G:0.0294118                                                          |          |   |     |                              |                  |
| chr28                                                                | 11638910 | 2 | 306 | G:0.921569                   | GCGACA:0.0784314 |
| chr28                                                                | 11638912 | 2 | 284 | A:0.820423                   | G:0.179577       |
| chr28                                                                | 11639095 | 2 | 296 | C:0.993243                   | T:0.00675676     |
| chr28                                                                | 11639874 | 2 | 280 | C:0.971429                   | A:0.0285714      |
| chr28                                                                | 11640588 | 6 | 320 | CATCTATCTATCTATCTATCT:0.2875 |                  |
| C:0.125 CATCTATCTATCTATCT:0.16875 CATCTATCTATCTATCTATCTATCT:0.315625 |          |   |     |                              |                  |
| CATCTATCTATCTATCTATCTATCTATCT:0.0875                                 |          |   |     |                              |                  |
| CATCTATCTATCTATCTATCTATCTATCTATCT:0.015625                           |          |   |     |                              |                  |
| chr28                                                                | 11640754 | 2 | 304 | A:0.246711                   | C:0.753289       |
| chr28                                                                | 11640794 | 2 | 312 | T:0.208333                   | TTATC:0.791667   |
| chr28                                                                | 11640807 | 2 | 310 | G:0.987097                   | A:0.0129032      |
| chr28                                                                | 11640936 | 2 | 308 | A:0.831169                   | T:0.168831       |
| chr28                                                                | 11641278 | 2 | 308 | A:0.912338                   | AT:0.0876623     |
| chr28                                                                | 11641403 | 2 | 300 | A:0.916667                   | C:0.0833333      |
| chr28                                                                | 11641509 | 2 | 314 | G:0.914013                   | A:0.0859873      |
| chr28                                                                | 11641581 | 2 | 304 | A:0.973684                   | G:0.0263158      |
| chr28                                                                | 11641643 | 2 | 302 | C:0.910596                   | T:0.089404       |
| chr28                                                                | 11641993 | 2 | 300 | C:0.74 T:0.26                |                  |
| chr28                                                                | 11642098 | 2 | 304 | AG:0.720395                  | A:0.279605       |
| chr28                                                                | 11642201 | 2 | 294 | G:0.887755                   | A:0.112245       |
| chr28                                                                | 11642416 | 2 | 292 | G:0.760274                   | C:0.239726       |
| chr28                                                                | 11642575 | 2 | 302 | G:0.738411                   | A:0.261589       |
| chr28                                                                | 11642692 | 2 | 296 | A:0.739865                   | G:0.260135       |
| chr28                                                                | 11642904 | 2 | 288 | T:0.75 C:0.25                |                  |
| chr28                                                                | 11643368 | 2 | 296 | CCT:0.942568                 | C:0.0574324      |
| chr28                                                                | 11643389 | 2 | 302 | C:0.728477                   | G:0.271523       |
| chr28                                                                | 11643473 | 2 | 300 | C:0.986667                   | T:0.0133333      |
| chr28                                                                | 11643490 | 2 | 304 | C:0.743421                   | T:0.256579       |
| chr28                                                                | 11643556 | 2 | 306 | A:0.75817                    | G:0.24183        |
| chr28                                                                | 11643956 | 2 | 304 | G:0.736842                   | A:0.263158       |
| chr28                                                                | 11643994 | 2 | 306 | C:0.72549                    | T:0.27451        |
| chr28                                                                | 11644107 | 2 | 298 | A:0.969799                   | G:0.0302013      |
| chr28                                                                | 11644288 | 2 | 300 | T:0.74 C:0.26                |                  |
| chr28                                                                | 11644717 | 2 | 302 | A:0.751656                   | G:0.248344       |
| chr28                                                                | 11644808 | 2 | 312 | A:0.99359                    | G:0.00641026     |
| chr28                                                                | 11645247 | 2 | 308 | A:0.746753                   | G:0.253247       |
| chr28                                                                | 11646411 | 2 | 308 | T:0.75974                    | C:0.24026        |
| chr28                                                                | 11646414 | 2 | 308 | C:0.772727                   | T:0.227273       |
| chr28                                                                | 11646644 | 2 | 308 | C:0.948052                   | T:0.0519481      |
| chr28                                                                | 11647305 | 2 | 288 | GT:0.704861                  | G:0.295139       |
| chr28                                                                | 11648316 | 2 | 298 | TG:0.768456                  | T:0.231544       |
| chr28                                                                | 11648719 | 2 | 308 | C:0.525974                   | G:0.474026       |
| chr28                                                                | 11648877 | 2 | 300 | G:0.973333                   | A:0.0266667      |
| chr28                                                                | 11648879 | 2 | 300 | G:0.573333                   | GCA:0.426667     |
| chr28                                                                | 11649448 | 2 | 292 | C:0.770548                   | T:0.229452       |
| chr28                                                                | 11649850 | 2 | 306 | T:0.918301                   | C:0.0816993      |

|                  |            |     |               |                |
|------------------|------------|-----|---------------|----------------|
| chr28            | 11650074 2 | 306 | T:0.53268     | C:0.46732      |
| chr28            | 11650446 2 | 304 | A:0.993421    | T:0.00657895   |
| chr28            | 11650763 2 | 302 | T:0.864238    | C:0.135762     |
| chr28            | 11651129 2 | 302 | C:0.738411    | CT:0.261589    |
| chr28            | 11651162 2 | 298 | G:0.758389    | A:0.241611     |
| chr28            | 11651188 2 | 300 | C:0.75 T:0.25 |                |
| chr28            | 11651220 2 | 298 | G:0.751678    | A:0.248322     |
| chr28            | 11651262 2 | 302 | G:0.735099    | C:0.264901     |
| chr28            | 11651378 2 | 304 | A:0.743421    | G:0.256579     |
| chr28            | 11651404 2 | 306 | C:0.754902    | T:0.245098     |
| chr28            | 11651493 2 | 304 | A:0.753289    | T:0.246711     |
| chr28            | 11651708 2 | 300 | C:0.786667    | T:0.213333     |
| chr28            | 11651773 2 | 304 | G:0.756579    | A:0.243421     |
| chr28            | 11651917 2 | 308 | T:0.74026     | A:0.25974      |
| chr28            | 11651918 2 | 308 | T:0.74026     | C:0.25974      |
| chr28            | 11651981 2 | 304 | C:0.743421    | CTT:0.256579   |
| chr28            | 11652232 2 | 210 | C:0.757143    | CCTT:0.242857  |
| chr28            | 11652278 2 | 220 | C:0.809091    | T:0.190909     |
| chr28            | 11652330 2 | 184 | T:0.673913    | C:0.326087     |
| chr28            | 11652763 2 | 262 | C:0.843511    | CTA:0.156489   |
| chr28            | 11653163 2 | 302 | GAGA:0.791391 | G:0.208609     |
| chr28            | 11653191 2 | 296 | C:0.97973     | T:0.0202703    |
| chr28            | 11653359 2 | 308 | A:0.792208    | G:0.207792     |
| chr28            | 11653409 2 | 288 | C:0.746528    | A:0.253472     |
| chr28            | 11653426 2 | 292 | G:0.828767    | A:0.171233     |
| chr28            | 11653579 2 | 226 | A:0.818584    | T:0.181416     |
| chr28            | 11653592 2 | 226 | T:0.818584    | A:0.181416     |
| chr28            | 11654206 2 | 224 | C:0.808036    | T:0.191964     |
| chr28            | 11654215 2 | 212 | A:0.561321    | G:0.438679     |
| chr28            | 11654296 2 | 286 | C:0.576923    | T:0.423077     |
| chr28            | 11654401 2 | 308 | T:0.798701    | G:0.201299     |
| chr28            | 11654527 2 | 282 | C:0.762411    | T:0.237589     |
| chr28            | 11654533 2 | 278 | T:0.55036     | C:0.44964      |
| chr28            | 11654573 3 | 304 | CCT:0.552632  | C:0.236842     |
| CCTCTCT:0.210526 |            |     |               |                |
| chr28            | 11654622 2 | 294 | C:0.778912    | T:0.221088     |
| chr28            | 11654717 2 | 306 | G:0.72549     | C:0.27451      |
| chr28            | 11654744 2 | 302 | T:0.738411    | C:0.261589     |
| chr28            | 11654788 2 | 308 | C:0.753247    | T:0.246753     |
| chr28            | 11654806 2 | 308 | G:0.753247    | GGA:0.246753   |
| chr28            | 11654835 2 | 302 | A:0.754967    | G:0.245033     |
| chr28            | 11654906 2 | 312 | C:0.769231    | T:0.230769     |
| chr28            | 11655174 2 | 312 | C:0.775641    | T:0.224359     |
| chr28            | 11655291 2 | 310 | C:0.754839    | T:0.245161     |
| chr28            | 11655316 2 | 310 | G:0.754839    | A:0.245161     |
| chr28            | 11655319 2 | 306 | G:0.996732    | A:0.00326797   |
| chr28            | 11655324 2 | 306 | C:0.777778    | T:0.222222     |
| chr28            | 11655454 2 | 314 | T:0.748408    | TCTTA:0.251592 |
| chr28            | 11655790 2 | 306 | T:0.75817     | C:0.24183      |
| chr28            | 11655791 2 | 306 | G:0.75817     | A:0.24183      |
| chr28            | 11655925 2 | 308 | A:0.99026     | G:0.00974026   |
| chr28            | 11655948 2 | 306 | G:0.745098    | A:0.254902     |
| chr28            | 11656006 2 | 304 | C:0.970395    | T:0.0296053    |
| chr28            | 11656314 2 | 302 | A:0.745033    | G:0.254967     |

|            |                |   |              |                           |               |
|------------|----------------|---|--------------|---------------------------|---------------|
| chr28      | 11656333       | 2 | 302          | A:0.745033                | C:0.254967    |
| chr28      | 11656345       | 2 | 302          | A:0.745033                | C:0.254967    |
| chr28      | 11656370       | 2 | 306          | A:0.986928                | G:0.0130719   |
| chr28      | 11656439       | 2 | 312          | C:0.714744                | T:0.285256    |
| chr28      | 11656683       | 2 | 310          | C:0.729032                | G:0.270968    |
| chr28      | 11656689       | 2 | 314          | C:0.847134                | G:0.152866    |
| chr28      | 11656782       | 2 | 308          | G:0.75974                 | A:0.24026     |
| chr28      | 11656805       | 2 | 304          | AG:0.766447               | A:0.233553    |
| chr28      | 11656806       | 2 | 304          | G:0.773026                | A:0.226974    |
| chr28      | 11656895       | 2 | 298          | A:0.734899                | T:0.265101    |
| chr28      | 11657017       | 2 | 310          | A:0.990323                | G:0.00967742  |
| chr28      | 11657049       | 2 | 314          | A:0.761146                | C:0.238854    |
| chr28      | 11657074       | 2 | 308          | A:0.99026                 | T:0.00974026  |
| chr28      | 11657122       | 2 | 314          | T:0.929936                | C:0.0700637   |
| chr28      | 11657324       | 2 | 312          | A:0.753205                | G:0.246795    |
| chr28      | 11657342       | 2 | 312          | A:0.753205                | C:0.246795    |
| chr28      | 11657425       | 2 | 304          | A:0.753289                | G:0.246711    |
| chr28      | 11657472       | 2 | 298          | CT:0.788591               | C:0.211409    |
| chr28      | 11657604       | 2 | 302          | A:0.738411                | G:0.261589    |
| chr28      | 11657746       | 2 | 302          | T:0.741722                | C:0.258278    |
| chr28      | 11657954       | 5 | 312          | GTTATTATTATTA:0.173077    | G:            |
| 0.384615   | GTTA:0.0480769 |   | GTTATTA:0.25 | GTTATTATTA:0.144231       |               |
| chr28      | 11657963       | 2 | 310          | A:0.874194                | G:0.125806    |
| chr28      | 11657969       | 2 | 302          | A:0.963576                | G:0.0364238   |
| chr28      | 11658263       | 2 | 304          | A:0.976974                | G:0.0230263   |
| chr28      | 11658441       | 2 | 306          | C:0.522876                | A:0.477124    |
| chr28      | 11658526       | 2 | 300          | A:0.99                    | T:0.01        |
| chr28      | 11658790       | 2 | 310          | C:0.990323                | A:0.00967742  |
| chr28      | 11658823       | 2 | 300          | A:0.39                    | G:0.61        |
| chr28      | 11659626       | 2 | 310          | C:0.806452                | CT:0.193548   |
| chr28      | 11659758       | 2 | 306          | T:0.800654                | C:0.199346    |
| chr28      | 11661093       | 3 | 306          | A:0.398693                | C:0.00980392  |
| T:0.591503 |                |   |              |                           |               |
| chr28      | 11661214       | 2 | 300          | T:0.376667                | TA:0.623333   |
| chr28      | 11661386       | 2 | 290          | G:0.989655                | A:0.0103448   |
| chr28      | 11661490       | 2 | 302          | C:0.986755                | T:0.013245    |
| chr28      | 11661717       | 2 | 296          | C:0.39527                 | T:0.60473     |
| chr28      | 11661758       | 2 | 304          | A:0.417763                | G:0.582237    |
| chr28      | 11661816       | 2 | 304          | T:0.921053                | A:0.0789474   |
| chr28      | 11661817       | 2 | 304          | G:0.921053                | T:0.0789474   |
| chr28      | 11661984       | 2 | 302          | T:0.403974                | C:0.596026    |
| chr28      | 11662084       | 2 | 302          | T:0.804636                | C:0.195364    |
| chr28      | 11662169       | 2 | 302          | C:0.990066                | T:0.00993377  |
| chr28      | 11662237       | 2 | 312          | T:0.99359                 | TTAGGTAGAATA: |
| 0.00641026 |                |   |              |                           |               |
| chr28      | 11662282       | 2 | 306          | G:0.973856                | C:0.0261438   |
| chr28      | 11662462       | 2 | 318          | AAC:0.732704              | A:0.267296    |
| chr28      | 11662480       | 2 | 318          | ACTGTGAGCTACTGAC:0.732704 |               |
| A:0.267296 |                |   |              |                           |               |
| chr28      | 11662796       | 2 | 308          | A:0.396104                | AC:0.603896   |
| chr28      | 11662804       | 2 | 308          | C:0.779221                | T:0.220779    |
| chr28      | 11662825       | 2 | 306          | G:0.405229                | A:0.594771    |
| chr28      | 11662862       | 2 | 310          | T:0.403226                | A:0.596774    |
| chr28      | 11662884       | 2 | 308          | A:0.418831                | T:0.581169    |

|       |            |     |                 |                |
|-------|------------|-----|-----------------|----------------|
| chr28 | 11663181 2 | 300 | A:0.996667      | ACT:0.00333333 |
| chr28 | 11663292 2 | 302 | A:0.423841      | T:0.576159     |
| chr28 | 11663403 2 | 300 | T:0.36 C:0.64   |                |
| chr28 | 11663419 2 | 304 | T:0.713816      | C:0.286184     |
| chr28 | 11663575 2 | 314 | C:0.382166      | T:0.617834     |
| chr28 | 11663586 2 | 314 | A:0.382166      | AT:0.617834    |
| chr28 | 11663630 2 | 318 | C:0.386792      | T:0.613208     |
| chr28 | 11663675 2 | 312 | T:0.785256      | C:0.214744     |
| chr28 | 11663739 2 | 302 | G:0.380795      | T:0.619205     |
| chr28 | 11663741 2 | 304 | G:0.990132      | C:0.00986842   |
| chr28 | 11663792 2 | 310 | A:0.390323      | C:0.609677     |
| chr28 | 11663894 2 | 306 | GA:0.392157     | G:0.607843     |
| chr28 | 11663948 2 | 302 | C:0.370861      | T:0.629139     |
| chr28 | 11664110 2 | 310 | A:0.990323      | T:0.00967742   |
| chr28 | 11664191 2 | 310 | T:0.729032      | C:0.270968     |
| chr28 | 11664251 2 | 312 | CATA:0.378205   | C:0.621795     |
| chr28 | 11664254 2 | 312 | A:0.987179      | T:0.0128205    |
| chr28 | 11664256 2 | 312 | T:0.987179      | C:0.0128205    |
| chr28 | 11664326 2 | 312 | C:0.375 T:0.625 |                |
| chr28 | 11664351 2 | 312 | T:0.375 C:0.625 |                |
| chr28 | 11664406 2 | 290 | G:0.406897      | C:0.593103     |
| chr28 | 11664486 2 | 306 | A:0.986928      | T:0.0130719    |
| chr28 | 11664713 2 | 294 | G:0.993197      | A:0.00680272   |
| chr28 | 11664724 2 | 296 | G:0.347973      | A:0.652027     |
| chr28 | 11664901 2 | 306 | C:0.990196      | A:0.00980392   |
| chr28 | 11664945 2 | 298 | C:0.651007      | A:0.348993     |
| chr28 | 11664965 2 | 304 | T:0.993421      | A:0.00657895   |
| chr28 | 11665294 2 | 306 | A:0.375817      | G:0.624183     |
| chr28 | 11665320 2 | 300 | C:0.726667      | T:0.273333     |
| chr28 | 11665484 2 | 298 | G:0.365772      | GA:0.634228    |
| chr28 | 11665594 2 | 306 | G:0.388889      | A:0.611111     |
| chr28 | 11665678 2 | 300 | T:0.373333      | C:0.626667     |
| chr28 | 11665705 2 | 296 | C:0.719595      | T:0.280405     |
| chr28 | 11665706 2 | 296 | A:0.361486      | G:0.638514     |
| chr28 | 11665989 2 | 312 | C:0.99359       | T:0.00641026   |
| chr28 | 11666004 2 | 308 | G:0.87987       | C:0.12013      |
| chr28 | 11666012 2 | 312 | T:0.99359       | C:0.00641026   |
| chr28 | 11666106 2 | 310 | G:0.796774      | A:0.203226     |
| chr28 | 11666130 2 | 310 | T:0.367742      | C:0.632258     |
| chr28 | 11666159 2 | 316 | G:0.360759      | T:0.639241     |
| chr28 | 11666161 2 | 316 | C:0.370253      | T:0.629747     |
| chr28 | 11666193 2 | 310 | C:0.970968      | T:0.0290323    |
| chr28 | 11666285 2 | 296 | C:0.368243      | T:0.631757     |
| chr28 | 11666395 2 | 296 | G:0.347973      | T:0.652027     |
| chr28 | 11666414 2 | 298 | T:0.375839      | C:0.624161     |
| chr28 | 11666482 2 | 306 | G:0.388889      | A:0.611111     |
| chr28 | 11666629 2 | 314 | G:0.414013      | T:0.585987     |
| chr28 | 11666647 2 | 316 | C:0.990506      | G:0.00949367   |
| chr28 | 11666701 2 | 304 | C:0.365132      | T:0.634868     |
| chr28 | 11666755 2 | 318 | G:0.399371      | A:0.600629     |
| chr28 | 11666762 2 | 318 | C:0.399371      | T:0.600629     |
| chr28 | 11666835 2 | 300 | CATT:0.78       | C:0.22         |
| chr28 | 11666869 2 | 304 | A:0.786184      | T:0.213816     |
| chr28 | 11666939 2 | 302 | A:0.357616      | T:0.642384     |



|                             |          |   |     |                                |              |
|-----------------------------|----------|---|-----|--------------------------------|--------------|
| chr28                       | 11667041 | 2 | 300 | C:0.346667                     | A:0.653333   |
| chr28                       | 11667295 | 2 | 318 | TAC:0.930818                   | T:0.0691824  |
| chr28                       | 11667321 | 2 | 312 | CACACAA:0.862179               | C:0.137821   |
| chr28                       | 11667323 | 2 | 312 | CACAA:0.887821                 | C:0.112179   |
| chr28                       | 11667325 | 2 | 312 | CAA:0.737179                   | C:0.262821   |
| chr28                       | 11667469 | 2 | 298 | C:0.724832                     | T:0.275168   |
| chr28                       | 11667474 | 2 | 300 | G:0.36                         | A:0.64       |
| chr28                       | 11667485 | 2 | 298 | C:0.637584                     | G:0.362416   |
| chr28                       | 11667540 | 2 | 304 | G:0.365132                     | A:0.634868   |
| chr28                       | 11667708 | 2 | 290 | T:0.875862                     | TAC:0.124138 |
| chr28                       | 11667740 | 2 | 290 | A:0.386207                     | G:0.613793   |
| chr28                       | 11667796 | 2 | 296 | T:0.364865                     | C:0.635135   |
| chr28                       | 11667797 | 2 | 296 | T:0.364865                     | A:0.635135   |
| chr28                       | 11667809 | 2 | 296 | G:0.976351                     | A:0.0236486  |
| chr28                       | 11667887 | 2 | 304 | A:0.884868                     | G:0.115132   |
| chr28                       | 11668132 | 2 | 308 | T:0.50974                      | C:0.49026    |
| chr28                       | 11668503 | 2 | 302 | C:0.980132                     | T:0.0198675  |
| chr28                       | 11668526 | 2 | 310 | GT:0.974194                    | G:0.0258065  |
| chr28                       | 11668732 | 2 | 296 | GA:0.983108                    | G:0.0168919  |
| chr28                       | 11668754 | 2 | 298 | C:0.97651                      | T:0.0234899  |
| chr28                       | 11668838 | 2 | 296 | A:0.986486                     | G:0.0135135  |
| chr28                       | 11668925 | 2 | 306 | GCCTTTAA:0.941176              | G:           |
| 0.0588235                   |          |   |     |                                |              |
| chr28                       | 11668967 | 2 | 282 | T:0.978723                     | C:0.0212766  |
| chr28                       | 11669252 | 2 | 304 | T:0.980263                     | C:0.0197368  |
| chr28                       | 11669308 | 2 | 302 | C:0.983444                     | A:0.0165563  |
| chr28                       | 11669781 | 2 | 298 | G:0.97651                      | C:0.0234899  |
| chr28                       | 11670042 | 2 | 320 | CAT:0.978125                   | C:0.021875   |
| chr28                       | 11670043 | 3 | 310 | A:0.480645                     | ATG:0.470968 |
| ATGTG:0.0483871             |          |   |     |                                |              |
| chr28                       | 11670061 | 2 | 320 | G:0.978125                     | A:0.021875   |
| chr28                       | 11670064 | 2 | 320 | C:0.959375                     | G:0.040625   |
| chr28                       | 11670314 | 2 | 304 | AC:0.763158                    | A:0.236842   |
| chr28                       | 11670454 | 2 | 294 | G:0.986395                     | A:0.0136054  |
| chr28                       | 11670603 | 2 | 302 | A:0.387417                     | T:0.612583   |
| chr28                       | 11671073 | 2 | 310 | C:0.896774                     | T:0.103226   |
| chr28                       | 11671184 | 2 | 310 | G:0.467742                     | A:0.532258   |
| chr28                       | 11671202 | 2 | 306 | C:0.437908                     | T:0.562092   |
| chr28                       | 11671346 | 2 | 296 | T:0.439189                     | C:0.560811   |
| chr28                       | 11671361 | 2 | 302 | C:0.423841                     | T:0.576159   |
| chr28                       | 11671460 | 2 | 310 | T:0.945161                     | A:0.0548387  |
| chr28                       | 11671813 | 2 | 298 | C:0.436242                     | T:0.563758   |
| chr28                       | 11671926 | 2 | 306 | G:0.941176                     | A:0.0588235  |
| chr28                       | 11671947 | 2 | 308 | C:0.418831                     | G:0.581169   |
| chr28                       | 11672114 | 2 | 318 | ACTTTCC:0.940252               | A:0.0597484  |
| chr28                       | 11672145 | 2 | 318 | A:0.940252                     | G:0.0597484  |
| chr28                       | 11672149 | 2 | 308 | T:0.431818                     | A:0.568182   |
| chr28                       | 11672178 | 2 | 304 | A:0.766447                     | G:0.233553   |
| chr28                       | 11672321 | 2 | 302 | C:0.943709                     | G:0.0562914  |
| chr28                       | 11672355 | 2 | 304 | T:0.782895                     | G:0.217105   |
| chr28                       | 11672417 | 2 | 294 | TG:0.442177                    | T:0.557823   |
| chr28                       | 11672566 | 6 | 312 | TTTTATTTATTTATTTATTTA:0.310897 |              |
| T:0.317308                  |          |   |     |                                |              |
| TTTTA:0.105769              |          |   |     |                                |              |
| TTTTATTTA:0.144231          |          |   |     |                                |              |
| TTTTATTTATTTA:0.0769231     |          |   |     |                                |              |
| TTTTATTTATTTATTTA:0.0448718 |          |   |     |                                |              |

|                  |          |               |     |                |                |
|------------------|----------|---------------|-----|----------------|----------------|
| chr28            | 11672615 | 2             | 312 | TTTA:0.820513  | T:0.179487     |
| chr28            | 11672855 | 2             | 316 | GTAAT:0.759494 | G:0.240506     |
| chr28            | 11672983 | 2             | 310 | GATTA:0.73871  | G:0.26129      |
| chr28            | 11674067 | 2             | 298 | C:0.419463     | A:0.580537     |
| chr28            | 11674195 | 3             | 296 | TA:0.412162    | T:0.503378     |
| TAA:0.0844595    |          |               |     |                |                |
| chr28            | 11674415 | 2             | 310 | T:0.948387     | A:0.0516129    |
| chr28            | 11674480 | 2             | 310 | C:0.941935     | A:0.0580645    |
| chr28            | 11675099 | 4             | 278 | TAA:0.431655   | T:0.158273     |
| TA:0.183453      |          | TAAA:0.226619 |     |                |                |
| chr28            | 11675118 | 2             | 284 | GA:0.661972    | G:0.338028     |
| chr28            | 11675396 | 2             | 298 | C:0.446309     | CA:0.553691    |
| chr28            | 11675414 | 2             | 296 | G:0.945946     | A:0.0540541    |
| chr28            | 11675566 | 2             | 306 | G:0.784314     | A:0.215686     |
| chr28            | 11675926 | 2             | 302 | TA:0.450331    | T:0.549669     |
| chr28            | 11676070 | 2             | 304 | A:0.9375       | AT:0.0625      |
| chr28            | 11676090 | 2             | 306 | A:0.738562     | T:0.261438     |
| chr28            | 11676203 | 2             | 304 | T:0.463816     | TA:0.536184    |
| chr28            | 11676290 | 2             | 302 | G:0.761589     | A:0.238411     |
| chr28            | 11676352 | 2             | 298 | C:0.439597     | T:0.560403     |
| chr28            | 11676692 | 2             | 306 | TAAA:0.411765  | T:0.588235     |
| chr28            | 11676696 | 2             | 302 | A:0.754967     | T:0.245033     |
| chr28            | 11676739 | 2             | 306 | T:0.421569     | C:0.578431     |
| chr28            | 11676836 | 2             | 304 | C:0.730263     | G:0.269737     |
| chr28            | 11676889 | 2             | 304 | C:0.746711     | T:0.253289     |
| chr28            | 11677022 | 2             | 310 | T:0.448387     | TAGTC:0.551613 |
| chr28            | 11677158 | 2             | 306 | A:0.509804     | AAG:0.490196   |
| chr28            | 11677159 | 2             | 306 | A:0.928105     | AG:0.0718954   |
| chr28            | 11677164 | 2             | 306 | T:0.928105     | A:0.0718954    |
| chr28            | 11677170 | 2             | 306 | A:0.928105     | G:0.0718954    |
| chr28            | 11677360 | 2             | 298 | C:0.687919     | CA:0.312081    |
| chr28            | 11677631 | 3             | 304 | TGAGA:0.575658 | T:0.0822368    |
| TGAGAGA:0.342105 |          |               |     |                |                |
| chr28            | 11677662 | 2             | 296 | C:0.804054     | T:0.195946     |
| chr28            | 11677675 | 2             | 292 | C:0.472603     | A:0.527397     |
| chr28            | 11677838 | 2             | 304 | C:0.414474     | G:0.585526     |
| chr28            | 11678159 | 3             | 298 | C:0.496644     | CT:0.261745    |
| CCTT:0.241611    |          |               |     |                |                |
| chr28            | 11678183 | 2             | 274 | T:0.332117     | C:0.667883     |
| chr28            | 11678370 | 2             | 310 | A:0.941935     | G:0.0580645    |
| chr28            | 11678849 | 2             | 298 | T:0.936242     | C:0.0637584    |
| chr28            | 11678978 | 2             | 312 | A:0.650641     | AT:0.349359    |
| chr28            | 11679100 | 2             | 310 | T:0.932258     | C:0.0677419    |
| chr28            | 11679252 | 2             | 306 | C:0.937908     | A:0.0620915    |
| chr28            | 11679465 | 2             | 292 | C:0.5          | T:0.5          |
| chr28            | 11679592 | 2             | 286 | A:0.965035     | C:0.034965     |
| chr28            | 11679828 | 2             | 240 | TC:0.458333    | T:0.541667     |
| chr28            | 11680019 | 2             | 288 | C:0.774306     | T:0.225694     |
| chr28            | 11680206 | 2             | 282 | C:0.48227      | G:0.51773      |
| chr28            | 11680249 | 2             | 286 | C:0.454545     | T:0.545455     |
| chr28            | 11680371 | 2             | 298 | G:0.630872     | A:0.369128     |
| chr28            | 11680456 | 2             | 286 | T:0.667832     | C:0.332168     |
| chr28            | 11680552 | 2             | 296 | C:0            | CA:1           |
| chr28            | 11681024 | 2             | 296 | G:0.655405     | A:0.344595     |

|             |            |     |                             |               |
|-------------|------------|-----|-----------------------------|---------------|
| chr28       | 11681265 2 | 306 | T:0.696078                  | A:0.303922    |
| chr28       | 11681314 2 | 302 | C:0.801325                  | T:0.198675    |
| chr28       | 11681488 2 | 314 | CAGAAACTCGGATGG:0.958599 C: |               |
| 0.0414013   |            |     |                             |               |
| chr28       | 11681515 2 | 300 | G:0.976667                  | A:0.0233333   |
| chr28       | 11681635 2 | 308 | T:0.672078                  | G:0.327922    |
| chr28       | 11681638 2 | 306 | A:0.761438                  | ACAG:0.238562 |
| chr28       | 11681822 2 | 308 | T:0.38961                   | G:0.61039     |
| chr28       | 11681960 2 | 306 | C:0.676471                  | T:0.323529    |
| chr28       | 11681964 2 | 304 | C:0.953947                  | T:0.0460526   |
| chr28       | 11682021 2 | 306 | G:0.375817                  | A:0.624183    |
| chr28       | 11682113 2 | 306 | T:0.852941                  | C:0.147059    |
| chr28       | 11682143 2 | 302 | A:0.675497                  | G:0.324503    |
| chr28       | 11682214 2 | 300 | T:0.76 C:0.24               |               |
| chr28       | 11682221 2 | 302 | G:0.791391                  | A:0.208609    |
| chr28       | 11682522 2 | 304 | T:0.769737                  | C:0.230263    |
| chr28       | 11682826 2 | 294 | C:0.653061                  | A:0.346939    |
| chr28       | 11682863 2 | 292 | C:0.979452                  | T:0.0205479   |
| chr28       | 11682929 2 | 314 | T:0.684713                  | C:0.315287    |
| chr28       | 11682955 2 | 312 | C:0.692308                  | T:0.307692    |
| chr28       | 11683463 2 | 302 | A:0.986755                  | C:0.013245    |
| chr28       | 11683516 2 | 286 | TA:0.951049                 | T:0.048951    |
| chr28       | 11683703 2 | 300 | T:0.95 TA:0.05              |               |
| chr28       | 11683704 3 | 304 | T:0.641447                  | A:0.0756579   |
| TA:0.282895 |            |     |                             |               |
| chr28       | 11683871 2 | 300 | A:0.66 T:0.34               |               |
| chr28       | 11683882 2 | 300 | T:0.66 C:0.34               |               |
| chr28       | 11683904 2 | 300 | T:0.98 C:0.02               |               |
| chr28       | 11683953 2 | 310 | G:0.670968                  | A:0.329032    |
| chr28       | 11684268 2 | 308 | T:0.675325                  | A:0.324675    |
| chr28       | 11684270 2 | 308 | C:0.935065                  | CT:0.0649351  |
| chr28       | 11684488 2 | 304 | T:0.671053                  | C:0.328947    |
| chr28       | 11684636 2 | 306 | T:0.656863                  | C:0.343137    |
| chr28       | 11684830 2 | 306 | A:0.754902                  | T:0.245098    |
| chr28       | 11684927 2 | 310 | C:0.674194                  | G:0.325806    |
| chr28       | 11685424 2 | 300 | T:0.98 C:0.02               |               |
| chr28       | 11685456 2 | 302 | A:0.662252                  | G:0.337748    |
| chr28       | 11685471 2 | 306 | T:0.980392                  | C:0.0196078   |
| chr28       | 11685838 2 | 308 | C:0.931818                  | T:0.0681818   |
| chr28       | 11686012 2 | 302 | C:0.678808                  | A:0.321192    |
| chr28       | 11686046 2 | 296 | C:0.682432                  | T:0.317568    |
| chr28       | 11686094 2 | 304 | G:0.763158                  | T:0.236842    |
| chr28       | 11686482 2 | 304 | C:0.694079                  | A:0.305921    |
| chr28       | 11686583 2 | 312 | G:0.698718                  | C:0.301282    |
| chr28       | 11686733 2 | 304 | A:0.927632                  | T:0.0723684   |
| chr28       | 11687334 2 | 298 | A:0.42953                   | G:0.57047     |
| chr28       | 11687417 2 | 310 | C:0.945161                  | T:0.0548387   |
| chr28       | 11688034 2 | 312 | A:0.907051                  | C:0.0929487   |
| chr28       | 11688227 2 | 312 | T:0.810897                  | C:0.189103    |
| chr28       | 11688665 2 | 312 | A:0.86859                   | T:0.13141     |
| chr28       | 11688672 2 | 312 | T:0.86859                   | TCTC:0.13141  |
| chr28       | 11688771 2 | 300 | G:0.7 A:0.3                 |               |
| chr28       | 11688958 2 | 278 | T:0.669065                  | TA:0.330935   |
| chr28       | 11689308 2 | 310 | T:0.790323                  | A:0.209677    |

|                                 |            |                |                     |                   |
|---------------------------------|------------|----------------|---------------------|-------------------|
| chr28                           | 11689682 2 | 308            | G:0.899351          | A:0.100649        |
| chr28                           | 11690414 2 | 302            | C:0.857616          | T:0.142384        |
| chr28                           | 11690489 2 | 296            | T:0.972973          | G:0.027027        |
| chr28                           | 11690556 2 | 318            | A:0.889937          | ACAAAGTAGTGTCATC: |
| 0.110063                        |            |                |                     |                   |
| chr28                           | 11690879 2 | 168            | TCC:0.809524        | T:0.190476        |
| chr28                           | 11690883 2 | 156            | CCCCA:0.711538      | C:0.288462        |
| chr28                           | 11690885 2 | 164            | CCCA:0.79878        | C:0.20122         |
| chr28                           | 11690888 2 | 168            | ACCC:0.809524       | A:0.190476        |
| chr28                           | 11690889 2 | 164            | C:0.79878           | G:0.20122         |
| chr28                           | 11690977 2 | 270            | T:0.67037           | C:0.32963         |
| chr28                           | 11691100 2 | 284            | T:0.859155          | C:0.140845        |
| chr28                           | 11691179 2 | 288            | T:0.972222          | C:0.0277778       |
| chr28                           | 11691215 2 | 276            | C:0.786232          | G:0.213768        |
| chr28                           | 11691342 4 | 248            | TAAA:0.584677       | T:0.149194        |
| TA:0.0967742                    |            | TAAAA:0.169355 |                     |                   |
| chr28                           | 11691381 3 | 232            | C:0.224138          | CT:0.577586       |
| CTT:0.198276                    |            |                |                     |                   |
| chr28                           | 11691535 2 | 146            | AAT:0.287671        | A:0.712329        |
| chr28                           | 11691644 2 | 174            | A:0.172414          | G:0.827586        |
| chr28                           | 11691670 2 | 212            | T:0.825472          | C:0.174528        |
| chr28                           | 11691825 2 | 274            | A:0.781022          | C:0.218978        |
| chr28                           | 11691854 2 | 290            | G:0.862069          | C:0.137931        |
| chr28                           | 11691905 2 | 296            | C:0.918919          | T:0.0810811       |
| chr28                           | 11691985 2 | 314            | T:0.984076          | TA:0.0159236      |
| chr28                           | 11691988 2 | 314            | T:0.984076          | TA:0.0159236      |
| chr28                           | 11691989 2 | 314            | T:0.942675          | TA:0.0573248      |
| chr28                           | 11691991 2 | 314            | T:0.984076          | TATTTATTTA:       |
| 0.0159236                       |            |                |                     |                   |
| chr28                           | 11691992 2 | 314            | T:0.942675          | TATTTATTTA:       |
| 0.0573248                       |            |                |                     |                   |
| chr28                           | 11691996 3 | 314            | T:0.923567          | C:0.0191083       |
| TC:0.0573248                    |            |                |                     |                   |
| chr28                           | 11692094 2 | 312            | T:0.926282          | C:0.0737179       |
| chr28                           | 11692109 2 | 312            | G:0.926282          | A:0.0737179       |
| chr28                           | 11692111 2 | 312            | T:0.926282          | G:0.0737179       |
| chr28                           | 11692146 2 | 300            | T:0.8 C:0.2         |                   |
| chr28                           | 11692697 4 | 298            | TAAA:0.40604        | T:0.191275        |
| TA:0.194631                     |            | TAA:0.208054   |                     |                   |
| chr28                           | 11692903 2 | 316            | C:0.920886          | T:0.0791139       |
| chr28                           | 11692913 2 | 294            | TGA:0.159864        | T:0.840136        |
| chr28                           | 11692931 2 | 316            | A:0.962025          | T:0.0379747       |
| chr28                           | 11692946 2 | 312            | AAGAG:0.935897      | A:0.0641026       |
| chr28                           | 11692990 2 | 302            | G:0.907285          | T:0.0927152       |
| chr28                           | 11693149 2 | 304            | C:0.980263          | T:0.0197368       |
| chr28                           | 11693163 2 | 300            | G:0.92 A:0.08       |                   |
| chr28                           | 11693239 2 | 308            | C:0.172078          | T:0.827922        |
| chr28                           | 11693250 2 | 306            | G:0.905229          | A:0.0947712       |
| chr28                           | 11693427 2 | 308            | T:0.915584          |                   |
| TAAATTCTAGCTAGAAAAAAA:0.0844156 |            |                |                     |                   |
| chr28                           | 11693736 2 | 308            | A:0.769481          | G:0.230519        |
| chr28                           | 11693880 2 | 310            | A:0.922581          | G:0.0774194       |
| chr28                           | 11693898 2 | 314            | C:0.863057          | T:0.136943        |
| chr28                           | 11694331 2 | 320            | C:0.975 CAGGG:0.025 |                   |

|       |               |   |     |                |                           |
|-------|---------------|---|-----|----------------|---------------------------|
| chr28 | 11694333      | 2 | 320 | T:0.975        | TCC:0.025                 |
| chr28 | 11694335      | 2 | 320 | T:0.975        | TGGGTGGCGCAGCGGTTTGGCGCC: |
|       |               |   |     | 0.025          |                           |
| chr28 | 11694776      | 2 | 292 | A:0.928082     | G:0.0719178               |
| chr28 | 11694790      | 2 | 300 | C:0.906667     | T:0.0933333               |
| chr28 | 11695051      | 2 | 308 | G:0.925325     | A:0.0746753               |
| chr28 | 11695127      | 2 | 306 | C:0.879085     | T:0.120915                |
| chr28 | 11695129      | 2 | 306 | C:0.879085     | T:0.120915                |
| chr28 | 11695454      | 3 | 298 | A:0.815436     | AT:0.120805               |
|       | ATT:0.0637584 |   |     |                |                           |
| chr28 | 11695464      | 2 | 298 | A:0.201342     | T:0.798658                |
| chr28 | 11695499      | 2 | 278 | TGAGA:0.302158 | T:0.697842                |
| chr28 | 11695895      | 2 | 300 | G:0.82         | T:0.18                    |
| chr28 | 11695928      | 2 | 294 | A:0.846939     | G:0.153061                |
| chr28 | 11695971      | 2 | 290 | C:0.851724     | CA:0.148276               |
| chr28 | 11696043      | 2 | 302 | T:0.821192     | C:0.178808                |
| chr28 | 11696157      | 2 | 310 | A:0.835484     | T:0.164516                |
| chr28 | 11696322      | 2 | 308 | T:0.837662     | C:0.162338                |
| chr28 | 11696333      | 2 | 304 | T:0.851974     | C:0.148026                |
| chr28 | 11696491      | 2 | 308 | T:0.847403     | G:0.152597                |
| chr28 | 11696563      | 2 | 306 | T:0.503268     | C:0.496732                |
| chr28 | 11696569      | 2 | 304 | A:0.835526     | C:0.164474                |
| chr28 | 11696667      | 2 | 298 | C:0.979866     | T:0.0201342               |
| chr28 | 11696696      | 2 | 298 | G:0.912752     | A:0.0872483               |
| chr28 | 11696738      | 2 | 302 | T:0.84106      | C:0.15894                 |
| chr28 | 11696739      | 2 | 302 | G:0.937086     | A:0.0629139               |
| chr28 | 11696799      | 2 | 306 | G:0.98366      | T:0.0163399               |
| chr28 | 11696804      | 2 | 306 | A:0.189542     | G:0.810458                |
| chr28 | 11696821      | 2 | 310 | TC:0.9         | T:0.1                     |
| chr28 | 11696879      | 4 | 298 | TAA:0.503356   | T:0.100671                |
|       | TA:0.0704698  |   |     |                |                           |
|       |               |   |     | TAAA:0.325503  |                           |
| chr28 | 11696890      | 2 | 304 | A:0.963816     | G:0.0361842               |
| chr28 | 11696987      | 2 | 296 | C:0.868243     | T:0.131757                |
| chr28 | 11697054      | 2 | 308 | T:0.873377     | C:0.126623                |
| chr28 | 11697164      | 2 | 308 | T:0.873377     | C:0.126623                |
| chr28 | 11697601      | 2 | 306 | T:0.862745     | C:0.137255                |
| chr28 | 11697656      | 2 | 310 | G:0.864516     | A:0.135484                |
| chr28 | 11697697      | 2 | 302 | C:0.877483     | T:0.122517                |
| chr28 | 11698030      | 2 | 312 | C:0.855769     | T:0.144231                |
| chr28 | 11698157      | 2 | 308 | A:0.857143     | G:0.142857                |
| chr28 | 11698169      | 2 | 306 | C:0.859477     | T:0.140523                |
| chr28 | 11698275      | 2 | 304 | T:0.292763     | C:0.707237                |
| chr28 | 11698653      | 2 | 306 | TC:0.415033    | T:0.584967                |
| chr28 | 11698840      | 2 | 310 | T:0.896774     | C:0.103226                |
| chr28 | 11698847      | 2 | 308 | G:0.948052     | T:0.0519481               |
| chr28 | 11699712      | 2 | 308 | A:0.876623     | G:0.123377                |
| chr28 | 11699795      | 2 | 304 | C:0.973684     | T:0.0263158               |
| chr28 | 11700007      | 2 | 316 | TTGAC:0.873418 | T:0.126582                |
| chr28 | 11700072      | 2 | 312 | GC:0.384615    | G:0.615385                |
| chr28 | 11700076      | 2 | 312 | A:0.384615     | ACTGT:0.615385            |
| chr28 | 11700159      | 2 | 314 | T:0.359873     | C:0.640127                |
| chr28 | 11700274      | 2 | 304 | T:0.194079     | C:0.805921                |
| chr28 | 11700395      | 2 | 306 | A:0.852941     | G:0.147059                |
| chr28 | 11700691      | 2 | 300 | A:0.726667     | C:0.273333                |

|                 |          |                     |     |                      |                   |
|-----------------|----------|---------------------|-----|----------------------|-------------------|
| chr28           | 11700988 | 2                   | 282 | A:0.351064           | AAAG:0.648936     |
| chr28           | 11701131 | 2                   | 310 | C:0.370968           | T:0.629032        |
| chr28           | 11701418 | 2                   | 304 | A:0.368421           | G:0.631579        |
| chr28           | 11701430 | 2                   | 298 | CATG:0.996644        | C:0.0033557       |
| chr28           | 11701535 | 2                   | 300 | A:0.373333           | C:0.626667        |
| chr28           | 11701569 | 2                   | 310 | T:0.367742           | G:0.632258        |
| chr28           | 11701671 | 2                   | 304 | A:0.766447           | G:0.233553        |
| chr28           | 11701845 | 2                   | 310 | C:0.390323           | A:0.609677        |
| chr28           | 11702069 | 2                   | 306 | A:0.395425           | G:0.604575        |
| chr28           | 11702330 | 2                   | 292 | T:0.383562           | C:0.616438        |
| chr28           | 11702460 | 2                   | 310 | G:0.4                | A:0.6             |
| chr28           | 11702480 | 2                   | 310 | A:0.4                | G:0.6             |
| chr28           | 11702530 | 2                   | 298 | T:0.872483           | C:0.127517        |
| chr28           | 11702555 | 2                   | 292 | AT:0.808219          | A:0.191781        |
| chr28           | 11702576 | 4                   | 306 | CAG:0.594771         | C:0.212418        |
| CAGAG:0.140523  |          | CAGAGAGAG:0.0522876 |     |                      |                   |
| chr28           | 11702775 | 2                   | 306 | A:0.921569           | G:0.0784314       |
| chr28           | 11703062 | 2                   | 306 | C:0.754902           | A:0.245098        |
| chr28           | 11703929 | 2                   | 308 | G:0.918831           | T:0.0811688       |
| chr28           | 11703942 | 2                   | 302 | A:0.953642           | C:0.0463576       |
| chr28           | 11703970 | 3                   | 306 | A:0.72549            | ATG:0.235294      |
| ATGTG:0.0392157 |          |                     |     |                      |                   |
| chr28           | 11703996 | 4                   | 318 | G:0.77044            | A:0.106918        |
| GTGTA:0.072327  |          | GTGTGTGTA:0.0503145 |     |                      |                   |
| chr28           | 11703997 | 2                   | 312 | T:0.916667           | TGTAA:0.0833333   |
| chr28           | 11703998 | 2                   | 312 | A:0.86859            | ATATATG:0.13141   |
| chr28           | 11704093 | 2                   | 310 | AACTT:0.883871       | A:0.116129        |
| chr28           | 11704168 | 2                   | 308 | T:0.425325           | G:0.574675        |
| chr28           | 11704368 | 2                   | 306 | C:0.872549           | T:0.127451        |
| chr28           | 11704375 | 2                   | 306 | C:0.918301           | G:0.0816993       |
| chr28           | 11705080 | 2                   | 318 | ACCAAGCAGTG:0.792453 | A:                |
| 0.207547        |          |                     |     |                      |                   |
| chr28           | 11705272 | 2                   | 298 | G:0.899329           | A:0.100671        |
| chr28           | 11705417 | 2                   | 276 | T:0.15942            | C:0.84058         |
| chr28           | 11705474 | 2                   | 284 | CCTCT:0.221831       | C:0.778169        |
| chr28           | 11705581 | 2                   | 300 | G:0.91               | GATTT:0.09        |
| chr28           | 11706162 | 2                   | 308 | C:0.944805           | T:0.0551948       |
| chr28           | 11706172 | 2                   | 304 | G:0.976974           | A:0.0230263       |
| chr28           | 11706272 | 2                   | 304 | T:0.322368           | C:0.677632        |
| chr28           | 11706273 | 2                   | 304 | G:0.904605           | A:0.0953947       |
| chr28           | 11706669 | 2                   | 300 | G:0.996667           | A:0.00333333      |
| chr28           | 11706952 | 2                   | 306 | T:0.529412           | G:0.470588        |
| chr28           | 11707335 | 2                   | 296 | T:0.537162           | C:0.462838        |
| chr28           | 11707436 | 2                   | 316 | A:0.952532           | ACTTCTT:0.0474684 |
| chr28           | 11707449 | 2                   | 310 | A:0.23871            | C:0.76129         |
| chr28           | 11707452 | 2                   | 312 | A:0.814103           | C:0.185897        |
| chr28           | 11707559 | 2                   | 294 | G:0.877551           | A:0.122449        |
| chr28           | 11707984 | 2                   | 300 | G:0.92               | A:0.08            |
| chr28           | 11708024 | 2                   | 290 | G:0.182759           | C:0.817241        |
| chr28           | 11708418 | 2                   | 294 | G:0.870748           | A:0.129252        |
| chr28           | 11708746 | 2                   | 294 | G:0.891156           | A:0.108844        |
| chr28           | 11708955 | 2                   | 306 | C:0.960784           | T:0.0392157       |
| chr28           | 11709127 | 4                   | 304 | CT:0.263158          | C:0.299342        |
| CTT:0.309211    |          | CTTT:0.128289       |     |                      |                   |

|                                                       |          |   |     |                   |                   |
|-------------------------------------------------------|----------|---|-----|-------------------|-------------------|
| chr28                                                 | 11709326 | 2 | 310 | C:0.603226        | T:0.396774        |
| chr28                                                 | 11709496 | 2 | 304 | G:0.789474        | A:0.210526        |
| chr28                                                 | 11709734 | 2 | 304 | C:0.654605        | T:0.345395        |
| chr28                                                 | 11710319 | 2 | 316 | A:0.943038        | T:0.056962        |
| chr28                                                 | 11710511 | 2 | 304 | G:0.684211        | A:0.315789        |
| chr28                                                 | 11710516 | 2 | 304 | A:0.684211        | G:0.315789        |
| chr28                                                 | 11710780 | 2 | 300 | C:0.95            | CTT:0.05          |
| chr28                                                 | 11710832 | 3 | 314 | CAA:0.194268      | C:0.375796        |
| CA:0.429936                                           |          |   |     |                   |                   |
| chr28                                                 | 11710891 | 2 | 310 | GA:0.974194       | G:0.0258065       |
| chr28                                                 | 11711092 | 2 | 294 | G:0.602041        | A:0.397959        |
| chr28                                                 | 11711396 | 2 | 314 | G:0.585987        | A:0.414013        |
| chr28                                                 | 11711437 | 2 | 304 | T:0.868421        | C:0.131579        |
| chr28                                                 | 11711629 | 2 | 310 | G:0.996774        | A:0.00322581      |
| chr28                                                 | 11711654 | 2 | 308 | T:0.461039        | C:0.538961        |
| chr28                                                 | 11712607 | 2 | 310 | C:0.941935        | T:0.0580645       |
| chr28                                                 | 11712708 | 2 | 300 | T:0.196667        | C:0.803333        |
| chr28                                                 | 11712782 | 2 | 306 | T:0.19281         | G:0.80719         |
| chr28                                                 | 11712968 | 2 | 302 | G:0.794702        | T:0.205298        |
| chr28                                                 | 11713049 | 2 | 300 | C:0.186667        | T:0.813333        |
| chr28                                                 | 11713254 | 2 | 300 | T:0.846667        | C:0.153333        |
| chr28                                                 | 11713386 | 2 | 300 | G:0.176667        | A:0.823333        |
| chr28                                                 | 11713631 | 2 | 306 | G:0.803922        | A:0.196078        |
| chr28                                                 | 11713777 | 2 | 308 | A:0.993506        | G:0.00649351      |
| chr28                                                 | 11713859 | 2 | 308 | G:0.74026         | A:0.25974         |
| chr28                                                 | 11713863 | 2 | 312 | T:0.926282        | C:0.0737179       |
| chr28                                                 | 11713956 | 2 | 306 | C:0.921569        | T:0.0784314       |
| chr28                                                 | 11714060 | 2 | 308 | C:0.866883        | T:0.133117        |
| chr28                                                 | 11714110 | 2 | 306 | A:0.189542        | G:0.810458        |
| chr28                                                 | 11714200 | 2 | 298 | T:0.802013        | A:0.197987        |
| chr28                                                 | 11714236 | 2 | 308 | T:0.737013        | C:0.262987        |
| chr28                                                 | 11714550 | 2 | 304 | T:0.733553        | A:0.266447        |
| chr28                                                 | 11714751 | 2 | 302 | C:0.781457        | T:0.218543        |
| chr28                                                 | 11715190 | 2 | 306 | C:0.810458        | T:0.189542        |
| chr28                                                 | 11715237 | 2 | 302 | G:0.847682        | A:0.152318        |
| chr28                                                 | 11715489 | 4 | 308 | ATGTG:0.590909    | A:0.136364        |
| ATG:0.168831 ATGTGTG:0.103896                         |          |   |     |                   |                   |
| chr28                                                 | 11715586 | 2 | 296 | T:0.695946        | G:0.304054        |
| chr28                                                 | 11715625 | 2 | 288 | G:0.684028        | GA:0.315972       |
| chr28                                                 | 11715826 | 2 | 302 | A:0.980132        | T:0.0198675       |
| chr28                                                 | 11715885 | 7 | 312 | AACACACAC:0.11859 | A:                |
| 0.144231 AAC:0.147436 AACAC:0.198718 AACACAC:0.185897 |          |   |     |                   |                   |
| AACACACACAC:0.121795 AACACACACACAC:0.0833333          |          |   |     |                   |                   |
| chr28                                                 | 11716376 | 2 | 302 | A:0.678808        | G:0.321192        |
| chr28                                                 | 11716569 | 2 | 304 | C:0.25            | T:0.75            |
| chr28                                                 | 11716825 | 2 | 308 | T:0.944805        | C:0.0551948       |
| chr28                                                 | 11717109 | 2 | 312 | C:0.951923        | G:0.0480769       |
| chr28                                                 | 11717110 | 2 | 318 | A:0.968553        | ACTGTTT:0.0314465 |
| chr28                                                 | 11717112 | 2 | 318 | A:0.968553        | T:0.0314465       |
| chr28                                                 | 11717115 | 2 | 318 | A:0.968553        | G:0.0314465       |
| chr28                                                 | 11717116 | 2 | 318 | T:0.968553        | TGTGTTCTGTTT:     |
| 0.0314465                                             |          |   |     |                   |                   |
| chr28                                                 | 11717266 | 2 | 300 | A:0.483333        | G:0.516667        |
| chr28                                                 | 11717510 | 2 | 308 | G:0.948052        | A:0.0519481       |

|       |          |   |     |                |                |
|-------|----------|---|-----|----------------|----------------|
| chr28 | 11717633 | 2 | 304 | A:0.671053     | G:0.328947     |
| chr28 | 11717756 | 2 | 306 | G:0.993464     | C:0.00653595   |
| chr28 | 11717888 | 2 | 302 | C:0.81457      | T:0.18543      |
| chr28 | 11718368 | 2 | 318 | C:0.95283      | T:0.0471698    |
| chr28 | 11718390 | 2 | 318 | C:0.955975     | T:0.0440252    |
| chr28 | 11718504 | 2 | 308 | G:0.698052     | C:0.301948     |
| chr28 | 11718548 | 2 | 314 | C:0.942675     | T:0.0573248    |
| chr28 | 11718549 | 2 | 314 | C:0.805732     | T:0.194268     |
| chr28 | 11718550 | 2 | 318 | C:0.704403     | T:0.295597     |
| chr28 | 11718551 | 2 | 320 | G:0.5          | A:0.5          |
| chr28 | 11718565 | 2 | 320 | G:0.5          | A:0.5          |
| chr28 | 11718678 | 2 | 308 | A:0.454545     | G:0.545455     |
| chr28 | 11718698 | 2 | 306 | C:0.944444     | T:0.0555556    |
| chr28 | 11718916 | 2 | 312 | GA:0.810897    | G:0.189103     |
| chr28 | 11718940 | 2 | 316 | T:0.702532     | C:0.297468     |
| chr28 | 11719139 | 2 | 316 | G:0.547468     | GTCCA:0.452532 |
| chr28 | 11719152 | 2 | 316 | C:0.481013     | G:0.518987     |
| chr28 | 11719208 | 2 | 312 | G:0.698718     | A:0.301282     |
| chr28 | 11719240 | 2 | 312 | G:0.942308     | A:0.0576923    |
| chr28 | 11719633 | 2 | 308 | G:0.925325     | A:0.0746753    |
| chr28 | 11720081 | 2 | 310 | T:0.945161     | C:0.0548387    |
| chr28 | 11720104 | 2 | 308 | G:0.74026      | A:0.25974      |
| chr28 | 11720159 | 2 | 306 | G:0.970588     | T:0.0294118    |
| chr28 | 11720191 | 2 | 298 | A:0.486577     | G:0.513423     |
| chr28 | 11720353 | 2 | 316 | C:0.474684     | T:0.525316     |
| chr28 | 11720469 | 2 | 298 | G:0.463087     | A:0.536913     |
| chr28 | 11720544 | 2 | 314 | G:0.942675     | A:0.0573248    |
| chr28 | 11720960 | 2 | 314 | A:0.977707     | T:0.022293     |
| chr28 | 11720994 | 2 | 312 | T:0.503205     | C:0.496795     |
| chr28 | 11721002 | 2 | 312 | A:0.817308     | G:0.182692     |
| chr28 | 11721029 | 2 | 306 | T:0.745098     | A:0.254902     |
| chr28 | 11721260 | 2 | 310 | C:0.167742     | A:0.832258     |
| chr28 | 11721292 | 2 | 314 | C:0.93949      | G:0.0605096    |
| chr28 | 11721367 | 2 | 312 | T:0.948718     | C:0.0512821    |
| chr28 | 11721379 | 2 | 310 | C:0.948387     | T:0.0516129    |
| chr28 | 11721484 | 2 | 306 | G:0.19281      | A:0.80719      |
| chr28 | 11721567 | 2 | 304 | T:0.1875       | C:0.8125       |
| chr28 | 11721850 | 2 | 308 | G:0.694805     | A:0.305195     |
| chr28 | 11722003 | 2 | 300 | G:0.843333     | A:0.156667     |
| chr28 | 11722131 | 2 | 296 | G:0.712838     | C:0.287162     |
| chr28 | 11722288 | 2 | 298 | C:0.194631     | T:0.805369     |
| chr28 | 11722477 | 2 | 304 | A:0.855263     | G:0.144737     |
| chr28 | 11722478 | 2 | 304 | G:0.855263     | T:0.144737     |
| chr28 | 11722493 | 2 | 308 | C:0.944805     | A:0.0551948    |
| chr28 | 11722659 | 2 | 314 | C:0.977707     | T:0.022293     |
| chr28 | 11722660 | 2 | 314 | A:0.707006     | G:0.292994     |
| chr28 | 11722665 | 2 | 316 | C:0.927215     | A:0.0727848    |
| chr28 | 11722748 | 2 | 314 | TACTC:0.914013 | T:0.0859873    |
| chr28 | 11723119 | 2 | 296 | G:0.939189     | T:0.0608108    |
| chr28 | 11723198 | 2 | 304 | A:0.825658     | G:0.174342     |
| chr28 | 11723529 | 2 | 302 | G:0.768212     | A:0.231788     |
| chr28 | 11723617 | 2 | 292 | T:0.167808     | C:0.832192     |
| chr28 | 11723841 | 2 | 258 | C:0.624031     | G:0.375969     |
| chr28 | 11724083 | 2 | 294 | CA:0.938776    | C:0.0612245    |



|       |          |   |     |                 |                  |
|-------|----------|---|-----|-----------------|------------------|
| chr28 | 11724092 | 2 | 294 | C:0.938776      | T:0.0612245      |
| chr28 | 11724129 | 2 | 310 | A:0.945161      | AGTAAT:0.0548387 |
| chr28 | 11724174 | 2 | 308 | T:0.733766      | G:0.266234       |
| chr28 | 11724300 | 2 | 314 | G:0.38535       | A:0.61465        |
| chr28 | 11724624 | 2 | 308 | A:0.957792      | ACACGG:0.0422078 |
| chr28 | 11724765 | 2 | 300 | C:0.87 A:0.13   |                  |
| chr28 | 11724983 | 2 | 310 | G:0.370968      | A:0.629032       |
| chr28 | 11725122 | 2 | 300 | A:0.86 C:0.14   |                  |
| chr28 | 11725132 | 2 | 294 | G:0.401361      | GA:0.598639      |
| chr28 | 11725179 | 2 | 314 | A:0.363057      | G:0.636943       |
| chr28 | 11725348 | 2 | 308 | G:0.733766      | T:0.266234       |
| chr28 | 11725375 | 2 | 310 | A:0.941935      | G:0.0580645      |
| chr28 | 11725670 | 2 | 314 | C:0.942675      | G:0.0573248      |
| chr28 | 11726126 | 2 | 306 | G:0.392157      | A:0.607843       |
| chr28 | 11726129 | 2 | 308 | A:0.941558      | G:0.0584416      |
| chr28 | 11726369 | 2 | 302 | A:0.745033      | C:0.254967       |
| chr28 | 11726394 | 2 | 310 | A:0.464516      | C:0.535484       |
| chr28 | 11726402 | 2 | 308 | T:0.938312      | C:0.0616883      |
| chr28 | 11726408 | 2 | 308 | G:0.396104      | A:0.603896       |
| chr28 | 11726499 | 2 | 314 | G:0.719745      | C:0.280255       |
| chr28 | 11726540 | 2 | 304 | G:0.700658      | A:0.299342       |
| chr28 | 11726628 | 2 | 310 | C:0.725806      | T:0.274194       |
| chr28 | 11726945 | 2 | 312 | T:0.945513      | C:0.0544872      |
| chr28 | 11726980 | 2 | 310 | G:0.709677      | A:0.290323       |
| chr28 | 11727124 | 2 | 302 | A:0.39404       | AGTT:0.60596     |
| chr28 | 11727419 | 2 | 308 | A:0.198052      | G:0.801948       |
| chr28 | 11727682 | 2 | 306 | G:0.74183       | C:0.25817        |
| chr28 | 11727699 | 2 | 306 | G:0.74183       | A:0.25817        |
| chr28 | 11727738 | 2 | 290 | A:0.393103      | T:0.606897       |
| chr28 | 11727777 | 2 | 296 | G:0.864865      | C:0.135135       |
| chr28 | 11727890 | 2 | 310 | CTTTAT:0.393548 | C:0.606452       |
| chr28 | 11727942 | 2 | 306 | G:0.45098       | C:0.54902        |
| chr28 | 11728046 | 2 | 294 | G:0.972789      | A:0.0272109      |
| chr28 | 11728195 | 2 | 316 | G:0.987342      | A:0.0126582      |
| chr28 | 11728438 | 2 | 298 | T:0.946309      | C:0.0536913      |
| chr28 | 11728532 | 2 | 298 | T:0.869128      | TA:0.130872      |
| chr28 | 11728568 | 2 | 304 | T:0.532895      | C:0.467105       |
| chr28 | 11728934 | 2 | 302 | T:0.188742      | C:0.811258       |
| chr28 | 11728968 | 2 | 300 | G:0.946667      | A:0.0533333      |
| chr28 | 11729059 | 2 | 302 | A:0.884106      | G:0.115894       |
| chr28 | 11729062 | 2 | 300 | AC:0.946667     | A:0.0533333      |
| chr28 | 11729189 | 2 | 302 | A:0.195364      | G:0.804636       |
| chr28 | 11729208 | 2 | 284 | A:0.778169      | AT:0.221831      |
| chr28 | 11729336 | 2 | 308 | A:0.844156      | T:0.155844       |
| chr28 | 11729414 | 2 | 300 | A:0.933333      | AT:0.0666667     |
| chr28 | 11729845 | 2 | 302 | G:0.94702       | GT:0.0529801     |
| chr28 | 11729856 | 2 | 308 | C:0.957792      | T:0.0422078      |
| chr28 | 11730457 | 2 | 310 | T:0.787097      | A:0.212903       |
| chr28 | 11730557 | 2 | 300 | C:0.593333      | A:0.406667       |
| chr28 | 11730558 | 2 | 300 | A:0.593333      | T:0.406667       |
| chr28 | 11730678 | 2 | 314 | G:0.904459      | T:0.0955414      |
| chr28 | 11731028 | 2 | 298 | C:0.409396      | T:0.590604       |
| chr28 | 11731043 | 2 | 294 | AT:0.72449      | A:0.27551        |
| chr28 | 11731203 | 2 | 296 | A:0.939189      | G:0.0608108      |

|       |          |   |     |                            |              |
|-------|----------|---|-----|----------------------------|--------------|
| chr28 | 11731384 | 2 | 292 | A:0.229452                 | C:0.770548   |
| chr28 | 11731464 | 2 | 308 | T:0.88961                  | C:0.11039    |
| chr28 | 11731567 | 2 | 314 | A:0.812102                 | G:0.187898   |
| chr28 | 11731671 | 2 | 300 | T:0.996667                 | C:0.00333333 |
| chr28 | 11731708 | 2 | 304 | G:0.773026                 | A:0.226974   |
| chr28 | 11731739 | 2 | 304 | T:0.950658                 | TA:0.0493421 |
| chr28 | 11731740 | 2 | 304 | G:0.950658                 | A:0.0493421  |
| chr28 | 11731743 | 2 | 306 | G:0.849673                 | T:0.150327   |
| chr28 | 11732347 | 2 | 302 | A:0.990066                 | C:0.00993377 |
| chr28 | 11732348 | 2 | 302 | G:0.990066                 | T:0.00993377 |
| chr28 | 11732452 | 2 | 306 | T:0.941176                 | C:0.0588235  |
| chr28 | 11732599 | 2 | 308 | C:0.948052                 | T:0.0519481  |
| chr28 | 11732701 | 2 | 288 | T:0.677083                 | C:0.322917   |
| chr28 | 11732767 | 2 | 304 | G:0.953947                 | A:0.0460526  |
| chr28 | 11732838 | 2 | 306 | C:0.676471                 | T:0.323529   |
| chr28 | 11732942 | 2 | 296 | A:0.658784                 | T:0.341216   |
| chr28 | 11733290 | 2 | 312 | G:0.961538                 | A:0.0384615  |
| chr28 | 11733329 | 2 | 312 | A:0.147436                 | G:0.852564   |
| chr28 | 11733710 | 2 | 310 | T:0.380645                 | C:0.619355   |
| chr28 | 11733715 | 2 | 310 | T:0.945161                 | C:0.0548387  |
| chr28 | 11733775 | 2 | 304 | T:0.401316                 | C:0.598684   |
| chr28 | 11734031 | 2 | 298 | G:0.939597                 | A:0.0604027  |
| chr28 | 11734088 | 2 | 310 | T:0.874194                 | G:0.125806   |
| chr28 | 11734722 | 2 | 302 | G:0.996689                 | A:0.00331126 |
| chr28 | 11734753 | 2 | 302 | T:0.791391                 | A:0.208609   |
| chr28 | 11735153 | 2 | 304 | C:0.911184                 | T:0.0888158  |
| chr28 | 11735175 | 2 | 292 | C:0.921233                 | CT:0.0787671 |
| chr28 | 11735301 | 2 | 300 | T:0.7                      | C:0.3        |
| chr28 | 11735469 | 2 | 302 | T:0.976821                 | G:0.0231788  |
| chr28 | 11735580 | 2 | 304 | TC:0.9375                  | T:0.0625     |
| chr28 | 11735631 | 2 | 300 | T:0.943333                 | G:0.0566667  |
| chr28 | 11735638 | 2 | 300 | T:0.943333                 | A:0.0566667  |
| chr28 | 11735692 | 2 | 316 | T:0.164557                 | A:0.835443   |
| chr28 | 11735701 | 2 | 316 | TAATGTCACTAAGTTTTG:0.93038 |              |
|       |          |   |     | T:0.0696203                |              |
| chr28 | 11735782 | 2 | 310 | C:0.941935                 | T:0.0580645  |
| chr28 | 11735932 | 2 | 288 | A:0.944444                 | C:0.0555556  |
| chr28 | 11736011 | 2 | 292 | T:0.955479                 | G:0.0445205  |
| chr28 | 11736058 | 3 | 306 | T:0.607843                 | TA:0.333333  |
|       |          |   |     | TAA:0.0588235              |              |
| chr28 | 11736124 | 2 | 312 | G:0.939103                 | A:0.0608974  |
| chr28 | 11736154 | 2 | 308 | G:0.970779                 | A:0.0292208  |
| chr28 | 11736271 | 2 | 306 | A:0.973856                 | G:0.0261438  |
| chr28 | 11736327 | 2 | 306 | T:0.954248                 | C:0.0457516  |
| chr28 | 11736399 | 2 | 304 | T:0.4375                   | C:0.5625     |
| chr28 | 11736492 | 2 | 300 | G:0.94                     | A:0.06       |
| chr28 | 11736637 | 2 | 308 | T:0.944805                 | A:0.0551948  |
| chr28 | 11736659 | 2 | 304 | A:0.940789                 | T:0.0592105  |
| chr28 | 11736793 | 2 | 300 | A:0.713333                 | G:0.286667   |
| chr28 | 11736832 | 2 | 296 | T:0.952703                 | G:0.0472973  |
| chr28 | 11736989 | 2 | 286 | C:0.863636                 | A:0.136364   |
| chr28 | 11737047 | 2 | 298 | G:0.171141                 | A:0.828859   |
| chr28 | 11737114 | 2 | 306 | A:0.650327                 | G:0.349673   |
| chr28 | 11737167 | 2 | 306 | A:0.405229                 | C:0.594771   |

|                   |            |                 |     |                                        |               |
|-------------------|------------|-----------------|-----|----------------------------------------|---------------|
| chr28             | 11737431   | 2               | 308 | T:0.993506                             | G:0.00649351  |
| chr28             | 11737474   | 2               | 308 | C:0.711039                             | T:0.288961    |
| chr28             | 11737555   | 2               | 296 | C:0.945946                             | T:0.0540541   |
| chr28             | 11737609   | 2               | 306 | T:0.885621                             | G:0.114379    |
| chr28             | 11737704   | 2               | 306 | C:0.970588                             | T:0.0294118   |
| chr28             | 11737793   | 2               | 304 | A:0.960526                             | G:0.0394737   |
| chr28             | 11737835   | 2               | 306 | C:0.754902                             | T:0.245098    |
| chr28             | 11737943   | 2               | 310 | T:0.677419                             | C:0.322581    |
| chr28             | 11737988   | 2               | 300 | C:0.696667                             | A:0.303333    |
| chr28             | 11738674   | 2               | 302 | A:0.682119                             | G:0.317881    |
| chr28             | 11738714   | 2               | 300 | A:0.766667                             | G:0.233333    |
| chr28             | 11738894   | 2               | 304 | T:0.881579                             | C:0.118421    |
| chr28             | 11738992   | 2               | 306 | G:0.947712                             | C:0.0522876   |
| chr28             | 11739053   | 2               | 312 | C:0.951923                             | T:0.0480769   |
| chr28             | 11739304   | 2               | 300 | G:0.716667                             | A:0.283333    |
| chr28             | 11739353   | 2               | 304 | C:0.947368                             | CTG:0.0526316 |
| chr28             | 11739355   | 4               | 306 | C:0.650327                             | G:0.0588235   |
| CTCTG:0.267974    |            | CTGTG:0.0228758 |     |                                        |               |
| chr28             | 11739443   | 2               | 302 | A:0.139073                             | G:0.860927    |
| chr28             | 11739473   | 2               | 292 | T:0.941781                             | C:0.0582192   |
| chr28             | 11739475   | 2               | 292 | G:0.941781                             | A:0.0582192   |
| chr28             | 11739534   | 3               | 312 | CCT:0.884615                           | C:0.0608974   |
| CCTCTCT:0.0544872 |            |                 |     |                                        |               |
| chr28             | 11739570   | 2               | 308 | A:0.698052                             | G:0.301948    |
| chr28             | 11739571   | 3               | 308 | TAAAAATTAAAAAAAAAAACTTAAAAAA:0.50974   |               |
|                   |            |                 |     | TAAAAATTAAAAAAAAAAACTTAAAAAA:0.0584416 |               |
| chr28             | 11739579   | 2               | 308 | AAAAAAAAAACTTAAAAAAAAAAATT:0.642857    |               |
|                   | A:0.357143 |                 |     |                                        |               |
| chr28             | 11739721   | 2               | 288 | A:0.9375 AAG:0.0625                    |               |
| chr28             | 11739753   | 2               | 288 | G:0.885417                             | A:0.114583    |
| chr28             | 11739762   | 2               | 288 | A:0.690972                             | T:0.309028    |
| chr28             | 11739763   | 2               | 288 | G:0.690972                             | A:0.309028    |
| chr28             | 11739831   | 2               | 310 | T:0.683871                             | C:0.316129    |
| chr28             | 11739926   | 2               | 304 | G:0.611842                             | T:0.388158    |
| chr28             | 11740697   | 2               | 306 | A:0.598039                             | C:0.401961    |
| chr28             | 11740934   | 2               | 310 | T:0.887097                             | A:0.112903    |
| chr28             | 11741024   | 2               | 298 | C:0.932886                             | T:0.0671141   |
| chr28             | 11741241   | 2               | 304 | C:0.996711                             | T:0.00328947  |
| chr28             | 11742019   | 2               | 302 | G:0.718543                             | A:0.281457    |
| chr28             | 11742044   | 2               | 298 | T:0.389262                             | G:0.610738    |
| chr28             | 11742213   | 2               | 308 | T:0.704545                             | C:0.295455    |
| chr28             | 11742283   | 2               | 298 | C:0.939597                             | T:0.0604027   |
| chr28             | 11742362   | 2               | 308 | T:0.993506                             | C:0.00649351  |
| chr28             | 11742433   | 2               | 302 | C:0.678808                             | G:0.321192    |
| chr28             | 11742883   | 2               | 308 | G:0.931818                             | A:0.0681818   |
| chr28             | 11743015   | 2               | 302 | A:0.970199                             | C:0.0298013   |
| chr28             | 11743065   | 2               | 310 | G:0.474194                             | A:0.525806    |
| chr28             | 11743074   | 2               | 312 | C:0.945513                             | T:0.0544872   |
| chr28             | 11743156   | 2               | 300 | C:0.8 T:0.2                            |               |
| chr28             | 11743195   | 2               | 300 | A:0.95 C:0.05                          |               |
| chr28             | 11743291   | 2               | 308 | G:0.438312                             | A:0.561688    |
| chr28             | 11743363   | 2               | 302 | T:0.943709                             | C:0.0562914   |
| chr28             | 11743412   | 2               | 302 | T:0.754967                             | C:0.245033    |
| chr28             | 11743534   | 2               | 304 | C:0.476974                             | T:0.523026    |

|       |          |   |     |             |                 |
|-------|----------|---|-----|-------------|-----------------|
| chr28 | 11743595 | 2 | 294 | T:0.469388  | C:0.530612      |
| chr28 | 11743633 | 2 | 294 | C:0.717687  | T:0.282313      |
| chr28 | 11743739 | 2 | 312 | C:0.467949  | T:0.532051      |
| chr28 | 11743856 | 2 | 298 | C:0.473154  | T:0.526846      |
| chr28 | 11743871 | 2 | 296 | C:0.135135  | G:0.864865      |
| chr28 | 11744902 | 2 | 294 | T:0.982993  | C:0.0170068     |
| chr28 | 11745129 | 2 | 296 | G:0.945946  | A:0.0540541     |
| chr28 | 11745150 | 2 | 296 | C:0.706081  | T:0.293919      |
| chr28 | 11745153 | 2 | 296 | G:0.486486  | A:0.513514      |
| chr28 | 11745162 | 2 | 296 | A:0.989865  | C:0.0101351     |
| chr28 | 11745296 | 2 | 312 | G:0.423077  | A:0.576923      |
| chr28 | 11745342 | 2 | 302 | C:0.927152  | CT:0.0728477    |
| chr28 | 11745693 | 2 | 310 | A:0.725806  | T:0.274194      |
| chr28 | 11745711 | 2 | 306 | G:0.424837  | A:0.575163      |
| chr28 | 11745848 | 2 | 288 | A:0.4375    | C:0.5625        |
| chr28 | 11745895 | 2 | 304 | C:0.75      | G:0.25          |
| chr28 | 11746260 | 2 | 302 | C:0.721854  | A:0.278146      |
| chr28 | 11746288 | 2 | 304 | A:0.450658  | ATCT:0.549342   |
| chr28 | 11746398 | 2 | 296 | C:0.472973  | T:0.527027      |
| chr28 | 11746450 | 2 | 302 | G:0.463576  | A:0.536424      |
| chr28 | 11746455 | 2 | 302 | C:0.463576  | T:0.536424      |
| chr28 | 11746530 | 2 | 296 | A:0.405405  | G:0.594595      |
| chr28 | 11746608 | 2 | 298 | C:0.949664  | T:0.0503356     |
| chr28 | 11746624 | 2 | 304 | T:0.434211  | C:0.565789      |
| chr28 | 11746672 | 2 | 302 | T:0.943709  | C:0.0562914     |
| chr28 | 11746701 | 2 | 304 | A:0.486842  | G:0.513158      |
| chr28 | 11746769 | 2 | 306 | T:0.931373  | TAGAC:0.0686275 |
| chr28 | 11746774 | 2 | 306 | A:0.509804  | C:0.490196      |
| chr28 | 11746779 | 2 | 308 | T:0.438312  | C:0.561688      |
| chr28 | 11746815 | 2 | 302 | G:0.937086  | GC:0.0629139    |
| chr28 | 11746863 | 2 | 302 | T:0.347682  | G:0.652318      |
| chr28 | 11747207 | 2 | 296 | T:0.972973  | C:0.027027      |
| chr28 | 11747361 | 2 | 310 | T:0.503226  | C:0.496774      |
| chr28 | 11747383 | 2 | 302 | C:0.5       | T:0.5           |
| chr28 | 11747404 | 2 | 306 | A:0.493464  | C:0.506536      |
| chr28 | 11747492 | 2 | 296 | T:0.787162  | C:0.212838      |
| chr28 | 11747632 | 2 | 310 | G:0.935484  | T:0.0645161     |
| chr28 | 11747678 | 2 | 314 | A:0.936306  | G:0.0636943     |
| chr28 | 11747686 | 2 | 314 | C:0.974522  | T:0.0254777     |
| chr28 | 11747705 | 2 | 312 | G:0.939103  | A:0.0608974     |
| chr28 | 11747918 | 2 | 308 | C:0.743506  | T:0.256494      |
| chr28 | 11748026 | 2 | 300 | A:0.936667  | G:0.0633333     |
| chr28 | 11748041 | 2 | 302 | T:0.84106   | C:0.15894       |
| chr28 | 11748103 | 2 | 308 | C:0.931818  | A:0.0681818     |
| chr28 | 11748179 | 2 | 320 | G:0.93125   | A:0.06875       |
| chr28 | 11748287 | 2 | 300 | T:0.896667  | A:0.103333      |
| chr28 | 11748536 | 2 | 304 | A:0.9375    | C:0.0625        |
| chr28 | 11748543 | 2 | 308 | TA:0.896104 | T:0.103896      |
| chr28 | 11748559 | 2 | 308 | G:0.896104  | T:0.103896      |
| chr28 | 11748669 | 2 | 308 | A:0.941558  | T:0.0584416     |
| chr28 | 11748694 | 2 | 308 | C:0.941558  | T:0.0584416     |
| chr28 | 11748695 | 2 | 302 | T:0.837748  | A:0.162252      |
| chr28 | 11748760 | 2 | 314 | G:0.94586   | T:0.0541401     |
| chr28 | 11748768 | 2 | 314 | A:0.94586   | T:0.0541401     |

|       |           |   |     |                     |               |
|-------|-----------|---|-----|---------------------|---------------|
| chr28 | 11748817  | 2 | 304 | C:0.904605          | T:0.0953947   |
| chr28 | 11748826  | 2 | 306 | T:0.931373          | C:0.0686275   |
| chr28 | 11749230  | 2 | 304 | TC:0.940789         | T:0.0592105   |
| chr28 | 11749346  | 2 | 302 | A:0.162252          | T:0.837748    |
| chr28 | 11749371  | 2 | 306 | T:0.859477          | TGTC:0.140523 |
| chr28 | 11749403  | 2 | 306 | T:0.846405          | C:0.153595    |
| chr28 | 11749624  | 2 | 304 | AT:0.9375           | A:0.0625      |
| chr28 | 11749767  | 2 | 310 | C:0.896774          | T:0.103226    |
| chr28 | 11750075  | 2 | 300 | G:0.846667          | T:0.153333    |
| chr28 | 11750108  | 2 | 304 | C:0.884868          | T:0.115132    |
| chr28 | 11750118  | 2 | 304 | G:0.884868          | A:0.115132    |
| chr28 | 11750298  | 2 | 308 | A:0.944805          | T:0.0551948   |
| chr28 | 11750397  | 2 | 304 | G:0.835526          | T:0.164474    |
| chr28 | 11750477  | 2 | 308 | A:0.87013           | C:0.12987     |
| chr28 | 11750496  | 2 | 298 | T:0.862416          | G:0.137584    |
| chr28 | 11750714  | 2 | 300 | C:0.943333          | T:0.0566667   |
| chr28 | 11750793  | 2 | 300 | T:0.946667          | G:0.0533333   |
| chr28 | 11751106  | 2 | 308 | C:0.961039          | T:0.038961    |
| chr28 | 11751221  | 2 | 310 | AACTC:0.887097      | A:0.112903    |
| chr28 | 11751359  | 2 | 304 | C:0.822368          | T:0.177632    |
| chr28 | 11751412  | 2 | 312 | A:0.833333          | G:0.166667    |
| chr28 | 11751632  | 2 | 302 | C:0.738411          | G:0.261589    |
| chr28 | 11751640  | 2 | 304 | C:0.993421          | A:0.00657895  |
| chr28 | 11751707  | 2 | 298 | G:0.852349          | C:0.147651    |
| chr28 | 11751732  | 2 | 302 | A:0.910596          | G:0.089404    |
| chr28 | 11751741  | 2 | 302 | A:0.943709          | G:0.0562914   |
| chr28 | 11751847  | 2 | 284 | C:0.926056          | CT:0.0739437  |
| chr28 | 11751848  | 2 | 286 | T:0.912587          | C:0.0874126   |
| chr28 | 11752068  | 2 | 296 | G:0.847973          | A:0.152027    |
| chr28 | 11752096  | 2 | 302 | T:0.837748          | A:0.162252    |
| chr28 | 11752211  | 2 | 296 | G:0.952703          | A:0.0472973   |
| chr28 | 11752340  | 2 | 310 | A:0.845161          | G:0.154839    |
| chr28 | 11752566  | 2 | 308 | TGTTTTTTTG:0.964286 | T:            |
|       | 0.0357143 |   |     |                     |               |
| chr28 | 11752614  | 2 | 298 | ATTTATTT:0.47651    | A:0.52349     |
| chr28 | 11752954  | 2 | 292 | T:0.938356          | C:0.0616438   |
| chr28 | 11752959  | 2 | 282 | T:0                 | TA:1          |
| chr28 | 11752992  | 2 | 302 | T:0                 | C:1           |
| chr28 | 11752993  | 2 | 302 | G:0                 | T:1           |
| chr28 | 11752996  | 2 | 302 | TA:0                | T:1           |
| chr28 | 11753001  | 2 | 302 | A:0                 | AT:1          |
| chr28 | 11753011  | 2 | 302 | C:0                 | T:1           |
| chr28 | 11753023  | 2 | 302 | C:0                 | CT:1          |
| chr28 | 11753061  | 2 | 306 | T:0                 | C:1           |
| chr28 | 11753063  | 2 | 306 | G:0                 | T:1           |
| chr28 | 11753067  | 2 | 306 | A:0                 | AT:1          |
| chr28 | 11753073  | 2 | 306 | C:0                 | CCTAA:1       |
| chr28 | 11753075  | 2 | 306 | G:0                 | A:1           |
| chr28 | 11753077  | 2 | 306 | ATAT:0              | A:1           |
| chr28 | 11753083  | 2 | 306 | G:0                 | GT:1          |
| chr28 | 11753088  | 2 | 306 | ATT:0               | A:1           |
| chr28 | 11753192  | 2 | 298 | C:0.875839          | T:0.124161    |
| chr28 | 11753196  | 2 | 298 | T:0.966443          | C:0.033557    |
| chr28 | 11753328  | 2 | 308 | G:0.162338          | A:0.837662    |

|           |          |   |     |                   |                 |
|-----------|----------|---|-----|-------------------|-----------------|
| chr28     | 11753366 | 2 | 306 | C:0.892157        | G:0.107843      |
| chr28     | 11753433 | 2 | 312 | T:0.298077        | G:0.701923      |
| chr28     | 11753690 | 2 | 310 | C:0.935484        | T:0.0645161     |
| chr28     | 11753833 | 2 | 310 | A:0.851613        | G:0.148387      |
| chr28     | 11753862 | 2 | 314 | TTA:0.850318      | T:0.149682      |
| chr28     | 11753866 | 2 | 314 | T:0.850318        | TCA:0.149682    |
| chr28     | 11753971 | 2 | 320 | T:0.865625        | A:0.134375      |
| chr28     | 11753989 | 2 | 320 | C:0.865625        | T:0.134375      |
| chr28     | 11754013 | 2 | 320 | G:0.865625        | A:0.134375      |
| chr28     | 11754054 | 2 | 306 | C:0.96732         | T:0.0326797     |
| chr28     | 11754316 | 2 | 312 | C:0.961538        | T:0.0384615     |
| chr28     | 11754371 | 2 | 310 | T:0.912903        | G:0.0870968     |
| chr28     | 11754373 | 2 | 312 | C:0.147436        | T:0.852564      |
| chr28     | 11754464 | 2 | 304 | A:0.996711        | G:0.00328947    |
| chr28     | 11754469 | 2 | 304 | G:0.898026        | A:0.101974      |
| chr28     | 11754654 | 2 | 308 | G:0.886364        | A:0.113636      |
| chr28     | 11754906 | 2 | 280 | A:0.896429        | G:0.103571      |
| chr28     | 11755001 | 2 | 154 | G:0.116883        | A:0.883117      |
| chr28     | 11755008 | 2 | 148 | G:0.655405        | A:0.344595      |
| chr28     | 11755023 | 2 | 148 | AG:0.655405       | A:0.344595      |
| chr28     | 11755177 | 2 | 274 | A:0.182482        | C:0.817518      |
| chr28     | 11755253 | 2 | 276 | C:0.873188        | A:0.126812      |
| chr28     | 11755303 | 2 | 298 | T:0.875839        | C:0.124161      |
| chr28     | 11755430 | 2 | 312 | T:0.891026        | TTTGTA:0.108974 |
| chr28     | 11755523 | 2 | 304 | AT:0.904605       | A:0.0953947     |
| chr28     | 11755599 | 2 | 312 | A:0.961538        | G:0.0384615     |
| chr28     | 11755688 | 2 | 308 | G:0.902597        | A:0.0974026     |
| chr28     | 11755801 | 2 | 312 | T:0.958333        | C:0.0416667     |
| chr28     | 11755835 | 2 | 316 | TCAGTCCC:0.901899 | T:              |
| 0.0981013 |          |   |     |                   |                 |
| chr28     | 11755867 | 2 | 316 | G:0.901899        | C:0.0981013     |
| chr28     | 11755935 | 2 | 312 | C:0.903846        | T:0.0961538     |
| chr28     | 11756119 | 2 | 300 | T:0.893333        | C:0.106667      |
| chr28     | 11756130 | 2 | 298 | T:0.85906         | C:0.14094       |
| chr28     | 11756251 | 2 | 302 | C:0.897351        | T:0.102649      |
| chr28     | 11756326 | 2 | 304 | C:0.878289        | G:0.121711      |
| chr28     | 11756376 | 2 | 306 | G:0.915033        | A:0.0849673     |
| chr28     | 11756482 | 2 | 306 | C:0.898693        | CT:0.101307     |
| chr28     | 11756520 | 2 | 304 | T:0.967105        | C:0.0328947     |
| chr28     | 11756606 | 2 | 304 | T:0.858553        | C:0.141447      |
| chr28     | 11756788 | 2 | 306 | C:0.957516        | A:0.0424837     |
| chr28     | 11756847 | 2 | 304 | A:0.970395        | G:0.0296053     |
| chr28     | 11756853 | 2 | 302 | A:0.86755         | G:0.13245       |
| chr28     | 11756973 | 2 | 310 | G:0.893548        | T:0.106452      |
| chr28     | 11757038 | 2 | 310 | A:0.958065        | G:0.0419355     |
| chr28     | 11757176 | 2 | 316 | T:0.968354        | C:0.0316456     |
| chr28     | 11757276 | 2 | 310 | A:0.964516        | C:0.0354839     |
| chr28     | 11757417 | 2 | 298 | TG:0.899329       | T:0.100671      |
| chr28     | 11757428 | 2 | 294 | G:0.867347        | A:0.132653      |
| chr28     | 11757535 | 2 | 312 | T:0.852564        | C:0.147436      |
| chr28     | 11757544 | 2 | 312 | G:0.852564        | A:0.147436      |
| chr28     | 11757665 | 2 | 306 | G:0.977124        | T:0.0228758     |
| chr28     | 11757782 | 2 | 306 | G:0.937908        | A:0.0620915     |
| chr28     | 11757820 | 2 | 308 | C:0.993506        | T:0.00649351    |

|                       |                                     |     |                        |                  |
|-----------------------|-------------------------------------|-----|------------------------|------------------|
| chr28                 | 11757837 2                          | 310 | T:0.864516             | A:0.135484       |
| chr28                 | 11757933 2                          | 314 | C:0.894904             | T:0.105096       |
| chr28                 | 11757943 2                          | 316 | A:0.993671             | G:0.00632911     |
| chr28                 | 11758254 2                          | 300 | C:0.87 T:0.13          |                  |
| chr28                 | 11758292 2                          | 306 | TA:0.895425            | T:0.104575       |
| chr28                 | 11758421 2                          | 276 | A:0.873188             | G:0.126812       |
| chr28                 | 11758542 7                          | 312 | TTATATATA:0.246795     | T:               |
| 0.137821              | TTA:0.0576923                       |     | TTATA:0.0480769        | TTATATA:0.282051 |
| TTATATATATA:0.0865385 |                                     |     | TTATATATATATA:0.141026 |                  |
| chr28                 | 11758583 2                          | 288 | G:0.913194             | A:0.0868056      |
| chr28                 | 11758654 2                          | 272 | A:0.922794             | G:0.0772059      |
| chr28                 | 11758731 2                          | 286 | AC:0.951049            | A:0.048951       |
| chr28                 | 11758736 2                          | 286 | A:0.951049             | AG:0.048951      |
| chr28                 | 11758846 2                          | 274 | AC:0.985401            | A:0.0145985      |
| chr28                 | 11759155 2                          | 264 | A:0.681818             | G:0.318182       |
| chr28                 | 11759257 2                          | 256 | AG:0.820312            | A:0.179688       |
| chr28                 | 11759580 2                          | 300 | G:0.976667             | GTA:0.0233333    |
| chr28                 | 11759626 2                          | 312 | T:0.964744             | TGTA:0.0352564   |
| chr28                 | 11759633 3                          | 318 | T:0.899371             | TAGATTAGA:       |
| 0.0377358             | TAGATTAGATAGATAGATAGATAGA:0.0628931 |     |                        |                  |
| chr28                 | 11759650 2                          | 318 | T:0.990566             | TAG:0.00943396   |
| chr28                 | 11759652 2                          | 318 | T:0.990566             | TAGA:0.00943396  |
| chr28                 | 11759654 2                          | 318 | G:0.990566             | A:0.00943396     |
| chr28                 | 11759656 2                          | 318 | C:0.990566             | A:0.00943396     |
| chr28                 | 11759659 2                          | 318 | T:0.990566             | G:0.00943396     |
| chr28                 | 11759663 2                          | 318 | T:0.990566             | G:0.00943396     |
| chr28                 | 11759666 2                          | 318 | A:0.990566             | ATTGG:0.00943396 |
| chr28                 | 11759678 2                          | 318 | CATTG:0.990566         | C:0.00943396     |
| chr28                 | 11759687 2                          | 318 | TATGTG:0.990566        | T:0.00943396     |
| chr28                 | 11759696 2                          | 318 | G:0.883648             | A:0.116352       |
| chr28                 | 11759783 2                          | 302 | T:0.89404              | C:0.10596        |
| chr28                 | 11759800 2                          | 306 | C:0.964052             | T:0.0359477      |
| chr28                 | 11759894 2                          | 308 | AT:0.857143            | A:0.142857       |
| chr28                 | 11759944 2                          | 312 | T:0.961538             | C:0.0384615      |
| chr28                 | 11760019 2                          | 310 | C:0.951613             | CA:0.0483871     |
| chr28                 | 11760300 2                          | 314 | C:0.971338             | T:0.0286624      |
| chr28                 | 11760339 2                          | 306 | A:0.908497             | G:0.0915033      |
| chr28                 | 11760449 2                          | 312 | C:0.939103             | T:0.0608974      |
| chr28                 | 11760463 2                          | 312 | C:0.939103             | T:0.0608974      |
| chr28                 | 11760472 2                          | 314 | A:0.735669             | T:0.264331       |
| chr28                 | 11760557 2                          | 316 | T:0.863924             | C:0.136076       |
| chr28                 | 11760585 2                          | 316 | A:0.936709             | G:0.0632911      |
| chr28                 | 11760624 2                          | 318 | T:0.971698             | C:0.0283019      |
| chr28                 | 11760663 2                          | 316 | C:0.984177             | CTTTT:0.0158228  |
| chr28                 | 11760665 2                          | 316 | T:0.946203             | TTTC:0.0537975   |
| chr28                 | 11760699 3                          | 304 | C:0.865132             | G:0.0493421      |
| CAG:0.0855263         |                                     |     |                        |                  |
| chr28                 | 11760752 2                          | 302 | C:0.996689             | T:0.00331126     |
| chr28                 | 11760779 2                          | 300 | C:0.91 A:0.09          |                  |
| chr28                 | 11760781 2                          | 300 | C:0.996667             | T:0.00333333     |
| chr28                 | 11760813 2                          | 296 | C:0.966216             | T:0.0337838      |
| chr28                 | 11760906 2                          | 306 | A:0.872549             | G:0.127451       |
| chr28                 | 11760940 2                          | 312 | C:0.897436             | T:0.102564       |
| chr28                 | 11761008 2                          | 302 | C:0.963576             | T:0.0364238      |

|                                                              |            |     |                        |                |
|--------------------------------------------------------------|------------|-----|------------------------|----------------|
| chr28                                                        | 11761240 2 | 304 | G:0.891447             | A:0.108553     |
| chr28                                                        | 11761340 2 | 304 | A:0.832237             | G:0.167763     |
| chr28                                                        | 11761480 2 | 308 | C:0.974026             | T:0.025974     |
| chr28                                                        | 11761669 2 | 306 | C:0.96732              | A:0.0326797    |
| chr28                                                        | 11761738 2 | 316 | T:0.851266             | C:0.148734     |
| chr28                                                        | 11761758 2 | 320 | T:0.99375              |                |
| TAATAATCATTTTAAAA:0.00625                                    |            |     |                        |                |
| chr28                                                        | 11761798 2 | 316 | CAT:0.96519            | C:0.0348101    |
| chr28                                                        | 11762033 2 | 312 | C:0.958333             | T:0.0416667    |
| chr28                                                        | 11762488 2 | 306 | G:0.973856             | A:0.0261438    |
| chr28                                                        | 11762505 2 | 302 | A:0.966887             | G:0.0331126    |
| chr28                                                        | 11762679 2 | 310 | CCA:0.958065           | C:0.0419355    |
| chr28                                                        | 11762724 2 | 300 | A:0.96 G:0.04          |                |
| chr28                                                        | 11762764 4 | 318 | TACACACACACAC:0.493711 | T:             |
| 0.292453 TACACACACACACAC:0.113208 TACACACACACACACAC:0.100629 |            |     |                        |                |
| chr28                                                        | 11762802 2 | 318 | C:0.965409             | T:0.0345912    |
| chr28                                                        | 11762821 2 | 298 | G:0.90604              | A:0.0939597    |
| chr28                                                        | 11762873 2 | 306 | G:0.977124             | A:0.0228758    |
| chr28                                                        | 11763027 2 | 304 | A:0.855263             | ACT:0.144737   |
| chr28                                                        | 11763144 2 | 298 | A:0.969799             | C:0.0302013    |
| chr28                                                        | 11763213 2 | 314 | A:0.894904             | C:0.105096     |
| chr28                                                        | 11763216 2 | 312 | T:0.974359             | A:0.025641     |
| chr28                                                        | 11763384 2 | 296 | G:0.969595             | T:0.0304054    |
| chr28                                                        | 11763486 2 | 300 | T:0.96 A:0.04          |                |
| chr28                                                        | 11763540 2 | 304 | C:0.161184             | A:0.838816     |
| chr28                                                        | 11763601 2 | 302 | C:0.86755              | G:0.13245      |
| chr28                                                        | 11763663 2 | 308 | TTTC:0.75974           | T:0.24026      |
| chr28                                                        | 11763713 2 | 298 | G:0.302013             | C:0.697987     |
| chr28                                                        | 11763777 2 | 294 | G:0.962585             | A:0.037415     |
| chr28                                                        | 11764044 2 | 300 | A:0.956667             | G:0.0433333    |
| chr28                                                        | 11764060 2 | 298 | T:0.855705             | G:0.144295     |
| chr28                                                        | 11764519 2 | 286 | T:0.982517             | C:0.0174825    |
| chr28                                                        | 11764552 2 | 298 | G:0.983221             | A:0.0167785    |
| chr28                                                        | 11764590 2 | 264 | TG:0.30303             | T:0.69697      |
| chr28                                                        | 11764592 2 | 282 | GTTT:0.964539          | G:0.035461     |
| chr28                                                        | 11764890 2 | 306 | T:0.964052             | TAAG:0.0359477 |
| chr28                                                        | 11765223 2 | 310 | AATC:0.767742          | A:0.232258     |
| chr28                                                        | 11765369 2 | 306 | C:0.964052             | A:0.0359477    |
| chr28                                                        | 11765425 2 | 310 | C:0.870968             | T:0.129032     |
| chr28                                                        | 11765464 2 | 320 | A:0.971875             |                |
| ATTATTTTTTATTTTATTATTT:0.028125                              |            |     |                        |                |
| chr28                                                        | 11765465 2 | 320 | C:0.971875             |                |
| CATTAAATTATTTTAAT:0.028125                                   |            |     |                        |                |
| chr28                                                        | 11765466 2 | 320 | C:0.971875             | T:0.028125     |
| chr28                                                        | 11765518 2 | 306 | T:0.970588             | C:0.0294118    |
| chr28                                                        | 11765627 2 | 304 | C:0.970395             | T:0.0296053    |
| chr28                                                        | 11765879 2 | 294 | G:0.714286             | T:0.285714     |
| chr28                                                        | 11766056 2 | 296 | A:0.966216             | C:0.0337838    |
| chr28                                                        | 11766099 2 | 304 | A:0.282895             | C:0.717105     |
| chr28                                                        | 11766106 2 | 304 | T:0.963816             | G:0.0361842    |
| chr28                                                        | 11766189 2 | 300 | A:0.963333             | T:0.0366667    |
| chr28                                                        | 11766254 2 | 292 | A:0.284247             | G:0.715753     |
| chr28                                                        | 11766328 4 | 316 | AAGAGAGAG:0.177215     | A:             |
| 0.281646 AAGAGAG:0.503165 AAGAGAGAGAGAGAG:0.0379747          |            |     |                        |                |



|           |            |     |                              |                |
|-----------|------------|-----|------------------------------|----------------|
| chr28     | 11766490 2 | 314 | CTTTTTTTTTTTT:0.372611 C:    |                |
| 0.627389  |            |     |                              |                |
| chr28     | 11766584 2 | 294 | C:0.918367                   | T:0.0816327    |
| chr28     | 11766717 2 | 300 | A:0.966667                   | G:0.0333333    |
| chr28     | 11767154 2 | 308 | G:0.931818                   | T:0.0681818    |
| chr28     | 11767267 2 | 296 | G:0.972973                   | A:0.027027     |
| chr28     | 11767311 2 | 290 | A:0.289655                   | G:0.710345     |
| chr28     | 11767397 2 | 304 | C:0.957237                   | T:0.0427632    |
| chr28     | 11767479 2 | 308 | A:0.967532                   | G:0.0324675    |
| chr28     | 11767489 2 | 304 | G:0.138158                   | A:0.861842     |
| chr28     | 11767576 2 | 280 | A:0.339286                   | T:0.660714     |
| chr28     | 11767711 2 | 308 | T:0.928571                   | C:0.0714286    |
| chr28     | 11767900 2 | 312 | T:0.900641                   | C:0.099359     |
| chr28     | 11768021 2 | 310 | G:0.180645                   | GGAAA:0.819355 |
| chr28     | 11768093 2 | 302 | T:0.960265                   | C:0.0397351    |
| chr28     | 11768261 2 | 298 | CA:0.16443                   | C:0.83557      |
| chr28     | 11768466 2 | 298 | C:0.969799                   | G:0.0302013    |
| chr28     | 11768605 2 | 308 | G:0.970779                   | A:0.0292208    |
| chr28     | 11768624 2 | 302 | A:0.847682                   | G:0.152318     |
| chr28     | 11768768 2 | 294 | T:0.979592                   | C:0.0204082    |
| chr28     | 11768919 2 | 310 | T:0.164516                   | A:0.835484     |
| chr28     | 11768996 2 | 302 | A:0.937086                   | G:0.0629139    |
| chr28     | 11769101 2 | 306 | C:0.928105                   | CTA:0.0718954  |
| chr28     | 11769122 2 | 306 | A:0.96732                    | C:0.0326797    |
| chr28     | 11769341 2 | 306 | C:0.980392                   | A:0.0196078    |
| chr28     | 11769666 2 | 310 | TGGCTTTCCCAAGTAA:0.980645 T: |                |
| 0.0193548 |            |     |                              |                |
| chr28     | 11769689 2 | 310 | C:0.883871                   | A:0.116129     |
| chr28     | 11769865 2 | 310 | A:0.322581                   | G:0.677419     |
| chr28     | 11770022 2 | 298 | G:0.959732                   | C:0.0402685    |
| chr28     | 11770722 2 | 302 | A:0.162252                   | G:0.837748     |
| chr28     | 11770739 2 | 304 | TG:0.898026                  | T:0.101974     |
| chr28     | 11771238 2 | 314 | C:0.968153                   | CTTA:0.0318471 |
| chr28     | 11771240 2 | 314 | T:0.181529                   | TATG:0.818471  |
| chr28     | 11771308 2 | 310 | T:0.970968                   | C:0.0290323    |
| chr28     | 11771840 2 | 304 | C:0.904605                   | A:0.0953947    |
| chr28     | 11772429 2 | 300 | G:0.746667                   | C:0.253333     |
| chr28     | 11772502 2 | 302 | T:0.933775                   | G:0.0662252    |
| chr28     | 11772564 2 | 302 | T:0.15894                    | C:0.84106      |
| chr28     | 11772595 2 | 302 | AT:0.55298                   | A:0.44702      |
| chr28     | 11772603 2 | 304 | T:0.990132                   | A:0.00986842   |
| chr28     | 11772715 2 | 302 | C:0.589404                   | A:0.410596     |
| chr28     | 11773090 2 | 296 | A:0.594595                   | C:0.405405     |
| chr28     | 11773354 2 | 310 | G:0.593548                   | A:0.406452     |
| chr28     | 11773427 2 | 304 | A:0.9375 G:0.0625            |                |
| chr28     | 11774005 2 | 306 | A:0.562092                   | C:0.437908     |
| chr28     | 11774216 2 | 308 | C:0.987013                   | T:0.012987     |
| chr28     | 11774403 2 | 296 | A:0.584459                   | G:0.415541     |
| chr28     | 11774797 2 | 308 | A:0.581169                   | T:0.418831     |
| chr28     | 11774834 2 | 310 | G:0.5 A:0.5                  |                |
| chr28     | 11775084 2 | 302 | A:0.572848                   | G:0.427152     |
| chr28     | 11775145 2 | 300 | C:0.753333                   | T:0.246667     |
| chr28     | 11775177 2 | 294 | GAATT:0.979592               | G:0.0204082    |
| chr28     | 11775270 2 | 286 | A:0.982517                   | G:0.0174825    |

|                                                                     |          |   |     |                                 |                   |
|---------------------------------------------------------------------|----------|---|-----|---------------------------------|-------------------|
| chr28                                                               | 11775358 | 2 | 294 | C:0.571429                      | T:0.428571        |
| chr28                                                               | 11775428 | 2 | 302 | A:0.556291                      | G:0.443709        |
| chr28                                                               | 11775447 | 2 | 302 | G:0.556291                      | T:0.443709        |
| chr28                                                               | 11775501 | 2 | 296 | A:0.959459                      | G:0.0405405       |
| chr28                                                               | 11775605 | 2 | 310 | G:0.577419                      | T:0.422581        |
| chr28                                                               | 11775627 | 2 | 310 | T:0.577419                      | C:0.422581        |
| chr28                                                               | 11775871 | 2 | 306 | A:0.584967                      | AC:0.415033       |
| chr28                                                               | 11775945 | 2 | 314 | A:0.576433                      | G:0.423567        |
| chr28                                                               | 11775964 | 2 | 314 | A:0.576433                      | T:0.423567        |
| chr28                                                               | 11776095 | 2 | 318 | A:0.962264                      | ATT:0.0377358     |
| chr28                                                               | 11776097 | 2 | 318 | T:0.962264                      | TTTAAAAG:         |
| 0.0377358                                                           |          |   |     |                                 |                   |
| chr28                                                               | 11776100 | 2 | 318 | A:0.962264                      | AGTGATT:0.0377358 |
| chr28                                                               | 11776103 | 2 | 318 | A:0.962264                      | AAAGACAGTG:       |
| 0.0377358                                                           |          |   |     |                                 |                   |
| chr28                                                               | 11776147 | 2 | 300 | C:0.583333                      | T:0.416667        |
| chr28                                                               | 11776163 | 2 | 306 | G:0.591503                      | A:0.408497        |
| chr28                                                               | 11776184 | 2 | 304 | G:0.766447                      | A:0.233553        |
| chr28                                                               | 11776207 | 2 | 310 | C:0.583871                      | G:0.416129        |
| chr28                                                               | 11776297 | 2 | 306 | T:0.584967                      | C:0.415033        |
| chr28                                                               | 11776433 | 2 | 308 | T:0.568182                      | C:0.431818        |
| chr28                                                               | 11776447 | 2 | 302 | A:0.559603                      | G:0.440397        |
| chr28                                                               | 11777017 | 2 | 302 | C:0.44702                       | T:0.55298         |
| chr28                                                               | 11777084 | 2 | 306 | A:0.767974                      | G:0.232026        |
| chr28                                                               | 11777250 | 2 | 290 | G:0.458621                      | A:0.541379        |
| chr28                                                               | 11777374 | 2 | 312 | C:0.464744                      | T:0.535256        |
| chr28                                                               | 11777375 | 2 | 312 | A:0.464744                      | G:0.535256        |
| chr28                                                               | 11777393 | 2 | 312 | GTCGAGGAATGTTCCCTCTATC:0.464744 |                   |
| G:0.535256                                                          |          |   |     |                                 |                   |
| chr28                                                               | 11777488 | 2 | 294 | G:0.465986                      | A:0.534014        |
| chr28                                                               | 11777788 | 2 | 304 | C:0.980263                      | G:0.0197368       |
| chr28                                                               | 11777938 | 2 | 290 | C:0.482759                      | T:0.517241        |
| chr28                                                               | 11777976 | 2 | 278 | TA:0.298561                     | T:0.701439        |
| chr28                                                               | 11778017 | 2 | 290 | GC:0.962069                     | G:0.037931        |
| chr28                                                               | 11778027 | 2 | 296 | C:0.976351                      | CAA:0.0236486     |
| chr28                                                               | 11778028 | 3 | 306 | C:0.251634                      | A:0.666667        |
| CAA:0.0816993                                                       |          |   |     |                                 |                   |
| chr28                                                               | 11778091 | 4 | 316 | CATTTTATTTTATTTTATTTT:0.607595  |                   |
| C:0.0474684      CATTTTATTTT:0.14557      CATTTTATTTTATTTT:0.199367 |          |   |     |                                 |                   |
| chr28                                                               | 11778217 | 2 | 284 | C:0.771127                      | T:0.228873        |
| chr28                                                               | 11778246 | 2 | 278 | C:0.471223                      | T:0.528777        |
| chr28                                                               | 11778341 | 2 | 298 | A:0.983221                      | G:0.0167785       |
| chr28                                                               | 11778413 | 2 | 308 | A:0.974026                      | G:0.025974        |
| chr28                                                               | 11778532 | 2 | 300 | G:0.986667                      | A:0.0133333       |
| chr28                                                               | 11778575 | 2 | 294 | A:0.969388                      | C:0.0306122       |
| chr28                                                               | 11778602 | 2 | 290 | T:0.503448                      | G:0.496552        |
| chr28                                                               | 11778783 | 2 | 300 | C:0.98    T:0.02                |                   |
| chr28                                                               | 11778821 | 2 | 282 | GCC:0.198582                    | G:0.801418        |
| chr28                                                               | 11778825 | 2 | 286 | C:0.975524                      | T:0.0244755       |
| chr28                                                               | 11779002 | 2 | 292 | CATA:0.986301                   | C:0.0136986       |
| chr28                                                               | 11779171 | 2 | 300 | G:0.913333                      | A:0.0866667       |
| chr28                                                               | 11779249 | 2 | 292 | G:0.489726                      | GAA:0.510274      |
| chr28                                                               | 11779250 | 3 | 294 | G:0.159864                      | A:0.55102         |
| GA:0.289116                                                         |          |   |     |                                 |                   |

|       |                               |     |                   |                  |
|-------|-------------------------------|-----|-------------------|------------------|
| chr28 | 11779353 2                    | 312 | C:0.961538        | T:0.0384615      |
| chr28 | 11779410 2                    | 312 | T:0.785256        | C:0.214744       |
| chr28 | 11779573 2                    | 304 | C:0.4375 T:0.5625 |                  |
| chr28 | 11779590 2                    | 302 | C:0.602649        | T:0.397351       |
| chr28 | 11780213 2                    | 314 | C:0.738854        | T:0.261146       |
| chr28 | 11780473 2                    | 312 | C:0.801282        | T:0.198718       |
| chr28 | 11780645 2                    | 304 | A:0.743421        | G:0.256579       |
| chr28 | 11780700 2                    | 308 | A:0.756494        | T:0.243506       |
| chr28 | 11780841 2                    | 306 | C:0.732026        | T:0.267974       |
| chr28 | 11780901 2                    | 310 | G:0.729032        | A:0.270968       |
| chr28 | 11781118 2                    | 298 | C:0.711409        | A:0.288591       |
| chr28 | 11781195 2                    | 300 | A:0.276667        | C:0.723333       |
| chr28 | 11781246 2                    | 300 | T:0.73 G:0.27     |                  |
| chr28 | 11781633 2                    | 310 | G:0.158065        | A:0.841935       |
| chr28 | 11781671 2                    | 308 | T:0.941558        | C:0.0584416      |
| chr28 | 11781690 2                    | 308 | A:0.730519        | AT:0.269481      |
| chr28 | 11782027 2                    | 306 | G:0.977124        | C:0.0228758      |
| chr28 | 11782187 2                    | 298 | A:0.714765        | T:0.285235       |
| chr28 | 11782207 2                    | 298 | A:0.728188        | G:0.271812       |
| chr28 | 11782276 2                    | 300 | G:0.703333        | A:0.296667       |
| chr28 | 11782293 2                    | 300 | G:0.85 A:0.15     |                  |
| chr28 | 11782738 2                    | 316 | T:0.696203        | TGGGTCCCTGGGCTC: |
|       | 0.303797                      |     |                   |                  |
| chr28 | 11782739 2                    | 316 | AC:0.696203       | A:0.303797       |
| chr28 | 11782818 2                    | 298 | A:0.993289        | G:0.00671141     |
| chr28 | 11782888 2                    | 306 | T:0.718954        | A:0.281046       |
| chr28 | 11783074 2                    | 288 | C:0.791667        | CCT:0.208333     |
| chr28 | 11783132 3                    | 310 | A:0.532258        | AAC:0.441935     |
|       | AACAC:0.0258065               |     |                   |                  |
| chr28 | 11783381 2                    | 298 | A:0.832215        | C:0.167785       |
| chr28 | 11783394 2                    | 306 | G:0.95098         | A:0.0490196      |
| chr28 | 11783522 2                    | 308 | A:0.133117        | C:0.866883       |
| chr28 | 11783544 2                    | 304 | A:0.210526        | G:0.789474       |
| chr28 | 11783653 2                    | 306 | C:0.944444        | T:0.0555556      |
| chr28 | 11783726 2                    | 302 | T:0.738411        | G:0.261589       |
| chr28 | 11783784 2                    | 308 | G:0.980519        | A:0.0194805      |
| chr28 | 11783812 4                    | 308 | T:0.594156        | TG:0.201299      |
|       | TGGC:0.0487013 TGGCG:0.155844 |     |                   |                  |
| chr28 | 11783861 2                    | 302 | AT:0.546358       | A:0.453642       |
| chr28 | 11784019 2                    | 312 | G:0.50641         | A:0.49359        |
| chr28 | 11784285 2                    | 302 | T:0.725166        | A:0.274834       |
| chr28 | 11784421 2                    | 312 | A:0.897436        | T:0.102564       |
| chr28 | 11784430 2                    | 306 | AT:0.836601       | A:0.163399       |
| chr28 | 11784451 2                    | 310 | T:0.170968        | G:0.829032       |
| chr28 | 11784754 2                    | 304 | G:0.907895        | A:0.0921053      |
| chr28 | 11784868 2                    | 296 | G:0.908784        | A:0.0912162      |
| chr28 | 11785165 2                    | 304 | C:0.898026        | T:0.101974       |
| chr28 | 11785291 2                    | 310 | A:0.903226        | C:0.0967742      |
| chr28 | 11785317 2                    | 304 | C:0.825658        | CT:0.174342      |
| chr28 | 11785352 2                    | 312 | G:0.737179        | A:0.262821       |
| chr28 | 11785677 2                    | 312 | G:0.823718        | T:0.176282       |
| chr28 | 11786110 2                    | 304 | C:0.970395        | T:0.0296053      |
| chr28 | 11786350 2                    | 306 | A:0.748366        | G:0.251634       |
| chr28 | 11786469 2                    | 302 | C:0.89404         | A:0.10596        |

|                                                           |          |   |     |                |              |
|-----------------------------------------------------------|----------|---|-----|----------------|--------------|
| chr28                                                     | 11786795 | 2 | 308 | T:0.788961     | C:0.211039   |
| chr28                                                     | 11787108 | 3 | 304 | C:0.605263     | CT:0.332237  |
| CTT:0.0625                                                |          |   |     |                |              |
| chr28                                                     | 11787247 | 2 | 310 | G:0.764516     | A:0.235484   |
| chr28                                                     | 11787410 | 2 | 312 | T:0.826923     | C:0.173077   |
| chr28                                                     | 11787613 | 2 | 302 | T:0.887417     | G:0.112583   |
| chr28                                                     | 11787775 | 2 | 306 | A:0.490196     | T:0.509804   |
| chr28                                                     | 11787811 | 2 | 312 | AT:0.753205    | A:0.246795   |
| chr28                                                     | 11787840 | 2 | 306 | C:0.787582     | T:0.212418   |
| chr28                                                     | 11788062 | 4 | 304 | CCT:0.523026   | C:0.0526316  |
| CCTCT:0.355263 CCTCTCT:0.0690789                          |          |   |     |                |              |
| chr28                                                     | 11788087 | 3 | 306 | C:0.843137     | CTG:0.133987 |
| CTCTG:0.0228758                                           |          |   |     |                |              |
| chr28                                                     | 11788253 | 2 | 290 | G:0.758621     | A:0.241379   |
| chr28                                                     | 11788301 | 2 | 282 | A:0.971631     | G:0.0283688  |
| chr28                                                     | 11788394 | 2 | 310 | G:0.96129      | A:0.0387097  |
| chr28                                                     | 11788490 | 2 | 296 | C:0.753378     | G:0.246622   |
| chr28                                                     | 11788587 | 2 | 306 | A:0.464052     | G:0.535948   |
| chr28                                                     | 11788962 | 2 | 304 | CACA:0.963816  | C:0.0361842  |
| chr28                                                     | 11788964 | 2 | 316 | C:0.920886     | T:0.0791139  |
| chr28                                                     | 11788967 | 7 | 318 | AAAAT:0.437107 | A:0.0408805  |
| TAAAT:0.138365 AAAATAAAT:0.166667 AAAATAAATAAAT:0.0849057 |          |   |     |                |              |
| ATAAAT:0.081761 AAAATAAATAAATAAAT:0.0503145               |          |   |     |                |              |
| chr28                                                     | 11789007 | 4 | 318 | T:0.704403     | A:0.106918   |
| TAAAA:0.106918 TAAATAAAA:0.081761                         |          |   |     |                |              |
| chr28                                                     | 11789017 | 2 | 302 | T:0.761589     | A:0.238411   |
| chr28                                                     | 11789228 | 2 | 304 | CAG:0.805921   | C:0.194079   |
| chr28                                                     | 11789273 | 2 | 310 | G:0.751613     | A:0.248387   |
| chr28                                                     | 11789401 | 2 | 312 | C:0.923077     | CA:0.0769231 |
| chr28                                                     | 11789780 | 2 | 304 | C:0.957237     | T:0.0427632  |
| chr28                                                     | 11789807 | 2 | 302 | C:0.572848     | T:0.427152   |
| chr28                                                     | 11789860 | 2 | 296 | A:0.564189     | T:0.435811   |
| chr28                                                     | 11789949 | 2 | 312 | G:0.977564     | GA:0.0224359 |
| chr28                                                     | 11790376 | 2 | 308 | G:0.720779     | T:0.279221   |
| chr28                                                     | 11790436 | 2 | 316 | A:0.971519     | C:0.028481   |
| chr28                                                     | 11790441 | 2 | 312 | G:0.996795     | A:0.00320513 |
| chr28                                                     | 11790546 | 2 | 300 | G:0.15 A:0.85  |              |
| chr28                                                     | 11790555 | 2 | 298 | C:0.567114     | A:0.432886   |
| chr28                                                     | 11791122 | 2 | 308 | C:0.948052     | T:0.0519481  |
| chr28                                                     | 11791647 | 2 | 306 | T:0.173203     | C:0.826797   |
| chr28                                                     | 11791873 | 2 | 304 | T:0.0394737    | C:0.960526   |
| chr28                                                     | 11791900 | 2 | 294 | C:0.751701     | T:0.248299   |
| chr28                                                     | 11793201 | 2 | 308 | C:0.724026     | T:0.275974   |
| chr28                                                     | 11793581 | 2 | 300 | C:0.953333     | T:0.0466667  |
| chr28                                                     | 11793605 | 2 | 308 | G:0.977273     | A:0.0227273  |
| chr28                                                     | 11793750 | 2 | 294 | A:0.748299     | AAG:0.251701 |
| chr28                                                     | 11793873 | 2 | 304 | A:0.161184     | C:0.838816   |
| chr28                                                     | 11793901 | 2 | 296 | AT:0.692568    | A:0.307432   |
| chr28                                                     | 11794282 | 2 | 298 | T:0.963087     | C:0.0369128  |
| chr28                                                     | 11794300 | 2 | 304 | G:0.75 T:0.25  |              |
| chr28                                                     | 11794318 | 2 | 310 | G:0.770968     | T:0.229032   |
| chr28                                                     | 11794971 | 2 | 294 | G:0.97619      | A:0.0238095  |
| chr28                                                     | 11794979 | 2 | 292 | G:0.157534     | A:0.842466   |
| chr28                                                     | 11795991 | 2 | 306 | C:0.957516     | T:0.0424837  |

|                                    |            |     |                    |                 |
|------------------------------------|------------|-----|--------------------|-----------------|
| chr28                              | 11796018 3 | 298 | T:0.302013         | TG:0.436242     |
| TTG:0.261745                       |            |     |                    |                 |
| chr28                              | 11796027 2 | 302 | G:0.864238         | GGA:0.135762    |
| chr28                              | 11796042 2 | 302 | T:0.940397         | C:0.0596026     |
| chr28                              | 11796175 2 | 304 | G:0.950658         | A:0.0493421     |
| chr28                              | 11796203 2 | 308 | C:0.977273         | T:0.0227273     |
| chr28                              | 11796322 2 | 310 | C:0.725806         | G:0.274194      |
| chr28                              | 11796550 2 | 304 | T:0.743421         | C:0.256579      |
| chr28                              | 11796653 2 | 308 | G:0.957792         | T:0.0422078     |
| chr28                              | 11796680 2 | 306 | A:0.738562         | C:0.261438      |
| chr28                              | 11796783 3 | 272 | TA:0.470588        | T:0.301471      |
| TAA:0.227941                       |            |     |                    |                 |
| chr28                              | 11796785 2 | 294 | A:0.982993         | T:0.0170068     |
| chr28                              | 11796954 2 | 304 | T:0.967105         | TATAA:0.0328947 |
| chr28                              | 11796955 4 | 306 | CTAAA:0.650327     | C:0.218954      |
| ATAAA:0.0392157 CTAATAAA:0.0915033 |            |     |                    |                 |
| chr28                              | 11797048 3 | 296 | GAA:0.182432       | G:0.581081      |
| GA:0.236486                        |            |     |                    |                 |
| chr28                              | 11797348 2 | 304 | C:0.940789         | T:0.0592105     |
| chr28                              | 11797612 2 | 310 | C:0.993548         | G:0.00645161    |
| chr28                              | 11797870 2 | 306 | TA:0.95098         | T:0.0490196     |
| chr28                              | 11797886 2 | 302 | C:0.721854         | CT:0.278146     |
| chr28                              | 11797924 2 | 304 | C:0.759868         | G:0.240132      |
| chr28                              | 11797926 2 | 304 | C:0.759868         | G:0.240132      |
| chr28                              | 11797930 3 | 306 | AAG:0.493464       | A:0.267974      |
| GAG:0.238562                       |            |     |                    |                 |
| chr28                              | 11798052 2 | 296 | C:0.716216         | T:0.283784      |
| chr28                              | 11798176 2 | 292 | GA:0.972603        | G:0.0273973     |
| chr28                              | 11798392 2 | 292 | T:0.722603         | C:0.277397      |
| chr28                              | 11798395 2 | 292 | C:0.722603         | T:0.277397      |
| chr28                              | 11798517 2 | 292 | AAATG:0.571918     | A:0.428082      |
| chr28                              | 11798537 2 | 298 | GAATGAATA:0.939597 | G:              |
| 0.0604027                          |            |     |                    |                 |
| chr28                              | 11798545 2 | 316 | A:0.892405         | AATG:0.107595   |
| chr28                              | 11798566 2 | 298 | A:0.761745         | C:0.238255      |
| chr28                              | 11798574 2 | 310 | A:0.951613         | AAG:0.0483871   |
| chr28                              | 11799037 2 | 312 | T:0.724359         | C:0.275641      |
| chr28                              | 11799055 2 | 306 | T:0.330065         | G:0.669935      |
| chr28                              | 11799202 2 | 286 | C:0.741259         | G:0.258741      |
| chr28                              | 11799343 2 | 266 | C:0.725564         | T:0.274436      |
| chr28                              | 11799356 2 | 272 | C:0.897059         | T:0.102941      |
| chr28                              | 11799383 2 | 258 | C:0.705426         | T:0.294574      |
| chr28                              | 11799462 2 | 286 | A:0.167832         | G:0.832168      |
| chr28                              | 11799673 2 | 294 | C:0.979592         | T:0.0204082     |
| chr28                              | 11799848 2 | 290 | C:0.355172         | T:0.644828      |
| chr28                              | 11799928 2 | 278 | C:0.870504         | CCT:0.129496    |
| chr28                              | 11799947 2 | 288 | C:0.600694         | G:0.399306      |
| chr28                              | 11800055 2 | 300 | T:0.386667         | C:0.613333      |
| chr28                              | 11800064 2 | 296 | TC:0.466216        | T:0.533784      |
| chr28                              | 11800122 2 | 292 | T:0.428082         | C:0.571918      |
| chr28                              | 11800129 2 | 290 | T:0.955172         | G:0.0448276     |
| chr28                              | 11800151 2 | 294 | C:0.969388         | A:0.0306122     |
| chr28                              | 11800187 2 | 300 | T:0.95 C:0.05      |                 |
| chr28                              | 11800210 2 | 302 | G:0.996689         | A:0.00331126    |

|       |                |                       |                        |               |
|-------|----------------|-----------------------|------------------------|---------------|
| chr28 | 11800343 4     | 312                   | CCTCTCTCTCTCT:0.394231 | C:0.125       |
|       | CCTCT:0.339744 | CCTCTCT:0.141026      |                        |               |
| chr28 | 11800516 2     | 296                   | T:0.817568             | A:0.182432    |
| chr28 | 11800593 2     | 306                   | A:0.408497             | C:0.591503    |
| chr28 | 11800604 2     | 304                   | AG:0.717105            | A:0.282895    |
| chr28 | 11800720 2     | 296                   | A:0.648649             | G:0.351351    |
| chr28 | 11800826 2     | 306                   | G:0.156863             | A:0.843137    |
| chr28 | 11800827 2     | 306                   | T:0.957516             | C:0.0424837   |
| chr28 | 11800915 2     | 314                   | T:0.152866             | G:0.847134    |
| chr28 | 11801101 2     | 308                   | T:0.818182             | A:0.181818    |
| chr28 | 11801371 2     | 308                   | G:0.827922             | A:0.172078    |
| chr28 | 11801386 2     | 304                   | A:0.838816             | G:0.161184    |
| chr28 | 11801464 2     | 304                   | A:0.983553             | C:0.0164474   |
| chr28 | 11801555 2     | 310                   | G:0.974194             | A:0.0258065   |
| chr28 | 11801669 2     | 314                   | C:0.573248             | T:0.426752    |
| chr28 | 11801788 2     | 314                   | G:0.942675             | A:0.0573248   |
| chr28 | 11802005 2     | 310                   | G:0.645161             | C:0.354839    |
| chr28 | 11802011 2     | 310                   | G:0.693548             | A:0.306452    |
| chr28 | 11802016 2     | 310                   | T:0.825806             | C:0.174194    |
| chr28 | 11802098 2     | 304                   | C:0.661184             | CT:0.338816   |
| chr28 | 11802211 2     | 306                   | A:0.95098              | T:0.0490196   |
| chr28 | 11802315 2     | 314                   | GTTTTCTTTCT:0.914013   | G:            |
|       | 0.0859873      |                       |                        |               |
| chr28 | 11802650 2     | 314                   | A:0.573248             | C:0.426752    |
| chr28 | 11802676 2     | 304                   | C:0.717105             | T:0.282895    |
| chr28 | 11802821 2     | 312                   | T:0.833333             | C:0.166667    |
| chr28 | 11803773 4     | 314                   | CGT:0.480892           | C:0.302548    |
|       | CGTGT:0.178344 | CGTGTGTGTGT:0.0382166 |                        |               |
| chr28 | 11804481 2     | 312                   | T:0.413462             | C:0.586538    |
| chr28 | 11804513 2     | 312                   | C:0.977564             | T:0.0224359   |
| chr28 | 11804562 2     | 308                   | C:0.980519             | T:0.0194805   |
| chr28 | 11804597 2     | 308                   | G:0.977273             | A:0.0227273   |
| chr28 | 11804796 2     | 312                   | G:0.977564             | A:0.0224359   |
| chr28 | 11804985 2     | 302                   | G:0.94702              | A:0.0529801   |
| chr28 | 11805043 2     | 314                   | C:0.818471             | G:0.181529    |
| chr28 | 11805140 2     | 310                   | AC:0.825806            | A:0.174194    |
| chr28 | 11805141 2     | 310                   | C:0.606452             | A:0.393548    |
| chr28 | 11805286 2     | 308                   | A:0.386364             | AGAG:0.613636 |
| chr28 | 11805554 2     | 302                   | C:0.612583             | T:0.387417    |
| chr28 | 11805609 2     | 312                   | G:0.823718             | T:0.176282    |
| chr28 | 11805896 2     | 310                   | T:0.906452             | C:0.0935484   |
| chr28 | 11805899 2     | 312                   | A:0.951923             | G:0.0480769   |
| chr28 | 11806045 2     | 310                   | G:0.835484             | T:0.164516    |
| chr28 | 11806146 2     | 302                   | C:0.407285             | CT:0.592715   |
| chr28 | 11806176 2     | 292                   | CA:0.94863             | C:0.0513699   |
| chr28 | 11806298 2     | 302                   | A:0.410596             | G:0.589404    |
| chr28 | 11806664 2     | 308                   | A:0.785714             | T:0.214286    |
| chr28 | 11807120 2     | 304                   | TACC:0.8125            | T:0.1875      |
| chr28 | 11807136 3     | 310                   | CT:0.764516            | C:0.190323    |
|       | CTT:0.0451613  |                       |                        |               |
| chr28 | 11807147 2     | 308                   | A:0.954545             | T:0.0454545   |
| chr28 | 11807307 2     | 310                   | CAA:0.619355           | C:0.380645    |
| chr28 | 11807387 2     | 298                   | G:0.577181             | T:0.422819    |
| chr28 | 11807555 2     | 304                   | A:0.411184             | T:0.588816    |

|       |            |     |                     |                 |
|-------|------------|-----|---------------------|-----------------|
| chr28 | 11807626 2 | 296 | A:0.837838          | G:0.162162      |
| chr28 | 11807707 2 | 294 | C:0.802721          | T:0.197279      |
| chr28 | 11807769 2 | 294 | G:0.884354          | A:0.115646      |
| chr28 | 11807828 2 | 310 | A:0.809677          | G:0.190323      |
| chr28 | 11808195 2 | 310 | T:0.841935          | C:0.158065      |
| chr28 | 11808348 2 | 302 | C:0.834437          | T:0.165563      |
| chr28 | 11808481 2 | 302 | T:0.860927          | C:0.139073      |
| chr28 | 11808638 2 | 306 | C:0.921569          | T:0.0784314     |
| chr28 | 11808712 2 | 304 | T:0.75 C:0.25       |                 |
| chr28 | 11809063 2 | 310 | T:0.4 C:0.6         |                 |
| chr28 | 11809072 2 | 310 | T:0.4 C:0.6         |                 |
| chr28 | 11809151 2 | 314 | C:0.585987          | T:0.414013      |
| chr28 | 11809171 2 | 314 | G:0.977707          | A:0.022293      |
| chr28 | 11809177 2 | 306 | A:0.401961          | G:0.598039      |
| chr28 | 11809382 2 | 300 | A:0.946667          | G:0.0533333     |
| chr28 | 11809535 2 | 316 | C:0.908228          | T:0.0917722     |
| chr28 | 11809603 2 | 310 | ATTC:0.893548       | A:0.106452      |
| chr28 | 11809604 2 | 310 | TTC:0.964516        | T:0.0354839     |
| chr28 | 11809605 2 | 310 | TC:0.970968         | T:0.0290323     |
| chr28 | 11809606 2 | 310 | C:0.658065          | CT:0.341935     |
| chr28 | 11809614 2 | 310 | T:0.993548          | TA:0.00645161   |
| chr28 | 11809622 2 | 310 | T:0.596774          | C:0.403226      |
| chr28 | 11809676 2 | 294 | G:0.598639          | A:0.401361      |
| chr28 | 11809724 2 | 290 | C:0.603448          | T:0.396552      |
| chr28 | 11809857 2 | 314 | A:0.573248          | G:0.426752      |
| chr28 | 11809963 2 | 304 | A:0.585526          | G:0.414474      |
| chr28 | 11810177 2 | 304 | T:0.838816          | A:0.161184      |
| chr28 | 11810265 2 | 312 | G:0.833333          | A:0.166667      |
| chr28 | 11810439 2 | 312 | G:0.977564          | C:0.0224359     |
| chr28 | 11810719 2 | 304 | T:0.575658          | C:0.424342      |
| chr28 | 11810788 2 | 306 | T:0.437908          | C:0.562092      |
| chr28 | 11810820 2 | 306 | C:0 A:1             |                 |
| chr28 | 11810822 2 | 306 | T:0 G:1             |                 |
| chr28 | 11810869 2 | 306 | C:0.588235          | T:0.411765      |
| chr28 | 11810984 2 | 308 | C:0.954545          | A:0.0454545     |
| chr28 | 11811150 2 | 306 | G:0.954248          | A:0.0457516     |
| chr28 | 11811157 2 | 304 | G:0.769737          | A:0.230263      |
| chr28 | 11811263 2 | 312 | C:0.580128          | T:0.419872      |
| chr28 | 11811376 2 | 302 | C:0.748344          | T:0.251656      |
| chr28 | 11811557 2 | 318 | T:0.965409          | G:0.0345912     |
| chr28 | 11811873 3 | 300 | CTT:0.51 C:0.266667 | CT:<br>0.223333 |
| chr28 | 11811960 2 | 294 | C:0.829932          | T:0.170068      |
| chr28 | 11812022 2 | 308 | G:0.837662          | T:0.162338      |
| chr28 | 11812159 2 | 310 | G:0.96129           | A:0.0387097     |
| chr28 | 11812218 2 | 304 | T:0.414474          | A:0.585526      |
| chr28 | 11812393 2 | 312 | G:0.955128          | T:0.0448718     |
| chr28 | 11812447 2 | 310 | T:0.964516          | C:0.0354839     |
| chr28 | 11812641 2 | 300 | G:0.74 C:0.26       |                 |
| chr28 | 11812831 2 | 308 | G:0.467532          | A:0.532468      |
| chr28 | 11812881 2 | 310 | A:0.583871          | AAT:0.416129    |
| chr28 | 11813079 2 | 310 | G:0.974194          | A:0.0258065     |
| chr28 | 11813123 2 | 306 | G:0.977124          | A:0.0228758     |
| chr28 | 11813221 2 | 304 | AC:0.970395         | A:0.0296053     |

|                      |          |   |     |                 |                   |
|----------------------|----------|---|-----|-----------------|-------------------|
| chr28                | 11813276 | 2 | 302 | T:0.751656      | TA:0.248344       |
| chr28                | 11813318 | 2 | 308 | A:0.409091      | G:0.590909        |
| chr28                | 11813397 | 2 | 302 | A:0.97351       | G:0.0264901       |
| chr28                | 11813433 | 2 | 300 | C:0.453333      | T:0.546667        |
| chr28                | 11813461 | 2 | 294 | AAC:0.965986    | A:0.0340136       |
| chr28                | 11813649 | 2 | 290 | C:0.97931       | T:0.0206897       |
| chr28                | 11813676 | 2 | 306 | T:0.421569      | TCGAGGTC:0.578431 |
| chr28                | 11813870 | 2 | 314 | G:0.974522      | GT:0.0254777      |
| chr28                | 11813872 | 2 | 314 | G:0.974522      | GT:0.0254777      |
| chr28                | 11813873 | 2 | 314 | G:0.974522      | GATA:0.0254777    |
| chr28                | 11813877 | 2 | 314 | G:0.974522      | GAAGTGAA:         |
| 0.0254777            |          |   |     |                 |                   |
| chr28                | 11813879 | 2 | 314 | ATTC:0.974522   | A:0.0254777       |
| chr28                | 11813883 | 2 | 314 | T:0.974522      | G:0.0254777       |
| chr28                | 11813898 | 2 | 294 | GA:0.139456     | G:0.860544        |
| chr28                | 11813981 | 2 | 300 | G:0.466667      | A:0.533333        |
| chr28                | 11813984 | 2 | 300 | C:0.98 T:0.02   |                   |
| chr28                | 11814013 | 2 | 302 | T:0.172185      | C:0.827815        |
| chr28                | 11814146 | 2 | 304 | G:0.967105      | GA:0.0328947      |
| chr28                | 11814337 | 2 | 302 | TCTC:0.966887   | T:0.0331126       |
| chr28                | 11814602 | 2 | 306 | C:0.934641      | CA:0.0653595      |
| chr28                | 11814736 | 2 | 300 | A:0.966667      | C:0.0333333       |
| chr28                | 11815053 | 2 | 306 | A:0.957516      | G:0.0424837       |
| chr28                | 11815772 | 2 | 304 | T:0.430921      | A:0.569079        |
| chr28                | 11815788 | 2 | 306 | G:0.166667      | A:0.833333        |
| chr28                | 11816506 | 3 | 316 | A:0.509494      | AAC:0.237342      |
| AACACACACAC:0.253165 |          |   |     |                 |                   |
| chr28                | 11816632 | 2 | 312 | T:0.650641      | C:0.349359        |
| chr28                | 11816655 | 2 | 306 | C:0.647059      | T:0.352941        |
| chr28                | 11816786 | 2 | 302 | T:0.698675      | C:0.301325        |
| chr28                | 11816941 | 2 | 308 | C:0.996753      | T:0.00324675      |
| chr28                | 11816942 | 2 | 308 | A:0.743506      | G:0.256494        |
| chr28                | 11816992 | 2 | 314 | G:0.684713      | C:0.315287        |
| chr28                | 11816998 | 2 | 314 | C:0.684713      | T:0.315287        |
| chr28                | 11817018 | 2 | 314 | A:0.684713      | G:0.315287        |
| chr28                | 11817080 | 2 | 304 | C:0.680921      | T:0.319079        |
| chr28                | 11817154 | 2 | 304 | A:0.680921      | G:0.319079        |
| chr28                | 11817388 | 2 | 308 | A:0.756494      | G:0.243506        |
| chr28                | 11817437 | 2 | 308 | T:0.681818      | A:0.318182        |
| chr28                | 11817467 | 2 | 308 | T:0.681818      | C:0.318182        |
| chr28                | 11817485 | 2 | 308 | C:0.681818      | T:0.318182        |
| chr28                | 11817814 | 2 | 306 | C:0.650327      | T:0.349673        |
| chr28                | 11817846 | 2 | 312 | CTAATT:0.958333 | C:0.0416667       |
| chr28                | 11818123 | 2 | 310 | C:0.687097      | T:0.312903        |
| chr28                | 11818310 | 2 | 298 | A:0.939597      | G:0.0604027       |
| chr28                | 11818731 | 2 | 312 | C:0.669872      | T:0.330128        |
| chr28                | 11819259 | 2 | 296 | T:0.689189      | C:0.310811        |
| chr28                | 11819408 | 2 | 316 | A:0.686709      | G:0.313291        |
| chr28                | 11819651 | 2 | 306 | G:0.679739      | A:0.320261        |
| chr28                | 11819773 | 2 | 308 | G:0.662338      | C:0.337662        |
| chr28                | 11819835 | 3 | 282 | CAA:0.195035    | C:0.695035        |
| CA:0.109929          |          |   |     |                 |                   |
| chr28                | 11819852 | 2 | 298 | A:0.667785      | G:0.332215        |
| chr28                | 11819948 | 2 | 310 | A:0.703226      | G:0.296774        |



chr28 11819970 2 318  
GTTAACTTAAGTTAAGTTAACTTAAGGCTTAAGTTAAGTTA:0.163522 G:0.836478  
chr28 11820100 2 300 T:0.836667 C:0.163333  
chr28 11820249 2 300 C:0.796667 T:0.203333  
chr28 11820285 3 314 GATAAATAATAA:0.340764 G:  
0.232484 GATAAATAA:0.426752  
chr28 11820434 2 302 T:0.682119 C:0.317881  
chr28 11820503 2 292 C:0.791096 T:0.208904  
chr28 11821191 2 300 G:0.78 GA:0.22  
chr28 11821468 2 304 T:0.924342 TG:0.0756579  
chr28 11822074 2 312 A:0.557692 T:0.442308  
chr28 11822106 2 312 C:0.625 T:0.375  
chr28 11822620 2 306 G:0.833333 T:0.166667  
chr28 11823401 2 298 C:0.993289 T:0.00671141  
chr28 11823549 2 304 T:0.542763 C:0.457237  
chr28 11823682 2 298 G:0.154362 A:0.845638  
chr28 11823745 2 310 A:0.593548 G:0.406452  
chr28 11824349 2 304 G:0.9375 C:0.0625  
chr28 11824401 2 310 G:0.132258 A:0.867742  
chr28 11824639 2 306 T:0.928105 G:0.0718954  
chr28 11824717 2 310 G:0.687097 T:0.312903  
chr28 11825067 2 306 G:0.918301 GC:0.0816993  
chr28 11825091 2 314 G:0.933121 A:0.066879  
chr28 11825265 2 308 G:0.477273 A:0.522727  
chr28 11825271 2 306 T:0.794118 C:0.205882  
chr28 11825284 2 308 C:0.477273 A:0.522727  
chr28 11825581 2 314 A:0.671975 G:0.328025  
chr28 11825663 2 302 C:0.450331 A:0.549669  
chr28 11825667 2 298 A:0.520134 T:0.479866  
chr28 11825919 2 312 T:0.996795 C:0.00320513  
chr28 11826023 2 308 G:0.152597 A:0.847403  
chr28 11826264 2 308 C:0.461039 CA:0.538961  
chr28 11826297 2 312 C:0.932692 T:0.0673077  
chr28 11826375 2 312 C:0.461538 A:0.538462  
chr28 11826420 2 298 C:0.147651 T:0.852349  
chr28 11826445 2 298 G:0.47651 C:0.52349  
chr28 11826491 2 302 G:0.665563 A:0.334437  
chr28 11826844 2 308 A:0.525974 G:0.474026  
chr28 11826905 2 314 C:0.770701 CTAAT:0.229299  
chr28 11826973 2 318 T:0.669811 C:0.330189  
chr28 11827081 2 312 CAATAA:0.923077 C:0.0769231  
chr28 11827150 2 304 A:0.973684 G:0.0263158  
chr28 11827449 2 308 T:0.951299 C:0.0487013  
chr28 11827559 2 302 C:0.68543 T:0.31457  
chr28 11827649 2 302 G:0.930464 A:0.0695364  
chr28 11827729 2 316 A:0.933544 G:0.0664557  
chr28 11827775 2 312 C:0.679487 T:0.320513  
chr28 11827790 2 312 G:0.919872 GAT:0.0801282  
chr28 11827919 2 308 A:0.162338 T:0.837662  
chr28 11827970 2 306 T:0.924837 A:0.0751634  
chr28 11827995 2 316 A:0.683544 ATTATATG:0.316456  
chr28 11828110 2 306 C:0.934641 A:0.0653595  
chr28 11828111 2 306 G:0.970588 A:0.0294118  
chr28 11828210 2 314 G:0.799363 A:0.200637

|       |          |   |     |                 |               |
|-------|----------|---|-----|-----------------|---------------|
| chr28 | 11828230 | 2 | 308 | T:0.928571      | TA:0.0714286  |
| chr28 | 11828240 | 2 | 312 | T:0.983974      | A:0.0160256   |
| chr28 | 11828364 | 2 | 308 | G:0.555195      | A:0.444805    |
| chr28 | 11828419 | 2 | 312 | C:0.541667      | T:0.458333    |
| chr28 | 11828430 | 2 | 312 | G:0.541667      | GT:0.458333   |
| chr28 | 11828459 | 2 | 312 | C:0.544872      | T:0.455128    |
| chr28 | 11828495 | 2 | 318 | C:0.144654      | T:0.855346    |
| chr28 | 11828545 | 2 | 312 | C:0.599359      | T:0.400641    |
| chr28 | 11828579 | 2 | 308 | T:0.525974      | C:0.474026    |
| chr28 | 11828585 | 2 | 306 | GA:0.594771     | G:0.405229    |
| chr28 | 11828601 | 2 | 318 | T:0.95283       | C:0.0471698   |
| chr28 | 11828692 | 2 | 300 | G:0.556667      | T:0.443333    |
| chr28 | 11828724 | 2 | 260 | A:0.257692      | G:0.742308    |
| chr28 | 11828765 | 2 | 204 | G:0.54902       | A:0.45098     |
| chr28 | 11828766 | 2 | 204 | A:0.387255      | G:0.612745    |
| chr28 | 11830489 | 2 | 104 | C:0.605769      | T:0.394231    |
| chr28 | 11830516 | 2 | 144 | ATT:0.548611    | A:0.451389    |
| chr28 | 11830520 | 2 | 144 | T:0.548611      | TAAA:0.451389 |
| chr28 | 11830549 | 2 | 230 | TA:0.278261     | T:0.721739    |
| chr28 | 11830623 | 2 | 286 | G:0.937063      | A:0.0629371   |
| chr28 | 11830972 | 2 | 292 | TTC:0.60274     | T:0.39726     |
| chr28 | 11830989 | 2 | 304 | TC:0.588816     | T:0.411184    |
| chr28 | 11831002 | 2 | 302 | C:0.645695      | T:0.354305    |
| chr28 | 11831044 | 2 | 304 | A:0.947368      | G:0.0526316   |
| chr28 | 11831052 | 2 | 304 | CT:0.947368     | C:0.0526316   |
| chr28 | 11831054 | 2 | 290 | TA:0.668966     | T:0.331034    |
| chr28 | 11831158 | 2 | 300 | A:0.166667      | AG:0.833333   |
| chr28 | 11831197 | 2 | 298 | G:0.489933      | A:0.510067    |
| chr28 | 11831230 | 2 | 300 | ACT:0.65 A:0.35 |               |
| chr28 | 11831478 | 2 | 294 | A:0.547619      | G:0.452381    |
| chr28 | 11831512 | 2 | 306 | AT:0.169935     | A:0.830065    |
| chr28 | 11831519 | 2 | 308 | C:0.555195      | T:0.444805    |
| chr28 | 11831520 | 2 | 308 | C:0.512987      | G:0.487013    |
| chr28 | 11831564 | 2 | 312 | A:0.554487      | T:0.445513    |
| chr28 | 11831602 | 2 | 300 | T:0.953333      | A:0.0466667   |
| chr28 | 11831672 | 2 | 314 | A:0.535032      | G:0.464968    |
| chr28 | 11831673 | 2 | 314 | C:0.700637      | T:0.299363    |
| chr28 | 11831689 | 2 | 314 | ATACC:0.535032  | A:0.464968    |
| chr28 | 11831695 | 2 | 314 | GGAA:0.535032   | G:0.464968    |
| chr28 | 11831743 | 2 | 298 | A:0.177852      | C:0.822148    |
| chr28 | 11831811 | 2 | 312 | T:0.490385      | C:0.509615    |
| chr28 | 11831902 | 2 | 314 | C:0.477707      | T:0.522293    |
| chr28 | 11831994 | 2 | 312 | G:0.971154      | T:0.0288462   |
| chr28 | 11832056 | 2 | 310 | G:0.948387      | A:0.0516129   |
| chr28 | 11832120 | 2 | 296 | G:0.527027      | A:0.472973    |
| chr28 | 11832161 | 2 | 308 | C:0.548701      | T:0.451299    |
| chr28 | 11832260 | 2 | 316 | G:0.487342      | A:0.512658    |
| chr28 | 11832317 | 2 | 298 | G:0.516779      | GA:0.483221   |
| chr28 | 11832396 | 2 | 294 | A:0.92517       | G:0.0748299   |
| chr28 | 11832428 | 2 | 302 | A:0.5 G:0.5     |               |
| chr28 | 11832479 | 2 | 310 | C:0.496774      | A:0.503226    |
| chr28 | 11832562 | 2 | 304 | G:0.496711      | A:0.503289    |
| chr28 | 11832586 | 2 | 302 | T:0.513245      | C:0.486755    |
| chr28 | 11832644 | 2 | 300 | T:0.51 C:0.49   |               |

|                                       |          |              |     |                               |                |
|---------------------------------------|----------|--------------|-----|-------------------------------|----------------|
| chr28                                 | 11832742 | 5            | 298 | ATTT:0.197987                 | A:0.0771812    |
| AT:0.302013                           |          | ATT:0.174497 |     | ATTTT:0.248322                |                |
| chr28                                 | 11832909 | 2            | 310 | A:0.5                         | G:0.5          |
| chr28                                 | 11832947 | 2            | 310 | T:0.945161                    | TA:0.0548387   |
| chr28                                 | 11832948 | 2            | 310 | A:0.841935                    | T:0.158065     |
| chr28                                 | 11832949 | 2            | 310 | G:0.512903                    | A:0.487097     |
| chr28                                 | 11833158 | 2            | 318 | T:0.943396                    |                |
| TTAAAACGTTTAAAAAAAATAAAAAAA:0.0566038 |          |              |     |                               |                |
| chr28                                 | 11833277 | 2            | 304 | C:0.536184                    | T:0.463816     |
| chr28                                 | 11833284 | 2            | 308 | T:0.993506                    | C:0.00649351   |
| chr28                                 | 11833337 | 2            | 310 | G:0.516129                    | A:0.483871     |
| chr28                                 | 11833421 | 2            | 300 | G:0.976667                    | T:0.0233333    |
| chr28                                 | 11833456 | 2            | 302 | CA:0                          | C:1            |
| chr28                                 | 11833459 | 2            | 302 | C:0                           | G:1            |
| chr28                                 | 11833491 | 2            | 310 | G:0.0193548                   | GAA:0.980645   |
| chr28                                 | 11833492 | 2            | 310 | T:0.0193548                   | TTAG:0.980645  |
| chr28                                 | 11833560 | 2            | 320 | ATGTGAATCT:0.946875           | A:             |
| 0.053125                              |          |              |     |                               |                |
| chr28                                 | 11833746 | 2            | 296 | C:0.496622                    | T:0.503378     |
| chr28                                 | 11833798 | 2            | 296 | T:0.97973                     | C:0.0202703    |
| chr28                                 | 11833836 | 2            | 300 | T:0.95                        | C:0.05         |
| chr28                                 | 11834109 | 2            | 296 | C:0.97973                     | T:0.0202703    |
| chr28                                 | 11834218 | 2            | 314 | C:0.675159                    | CCAAA:0.324841 |
| chr28                                 | 11834221 | 2            | 314 | C:0.675159                    | T:0.324841     |
| chr28                                 | 11834404 | 2            | 304 | A:0.5625                      | G:0.4375       |
| chr28                                 | 11834520 | 2            | 306 | G:0.147059                    | A:0.852941     |
| chr28                                 | 11834541 | 2            | 306 | G:0.169935                    | GT:0.830065    |
| chr28                                 | 11834686 | 2            | 310 | G:0.53871                     | A:0.46129      |
| chr28                                 | 11834708 | 2            | 306 | G:0.944444                    | A:0.0555556    |
| chr28                                 | 11834721 | 2            | 308 | C:0.149351                    | T:0.850649     |
| chr28                                 | 11834734 | 2            | 308 | C:0.149351                    | T:0.850649     |
| chr28                                 | 11834783 | 2            | 288 | G:0.649306                    | A:0.350694     |
| chr28                                 | 11834854 | 2            | 294 | A:0.97619                     | G:0.0238095    |
| chr28                                 | 11835063 | 2            | 306 | G:0.297386                    | A:0.702614     |
| chr28                                 | 11835117 | 2            | 304 | C:0.927632                    | CA:0.0723684   |
| chr28                                 | 11835326 | 2            | 306 | G:0.150327                    | A:0.849673     |
| chr28                                 | 11835337 | 3            | 318 | T:0.679245                    |                |
| TAAAATGGGAAGGTAAAAA:0.27044           |          |              |     | TAAAATGGGAAGGTAAAAA:0.0503145 |                |
| chr28                                 | 11835457 | 2            | 310 | G:0.922581                    | T:0.0774194    |
| chr28                                 | 11835484 | 2            | 300 | T:0.15                        | A:0.85         |
| chr28                                 | 11835514 | 2            | 298 | C:0.912752                    | CA:0.0872483   |
| chr28                                 | 11835610 | 2            | 308 | T:0.142857                    | C:0.857143     |
| chr28                                 | 11835757 | 2            | 306 | C:0.830065                    | T:0.169935     |
| chr28                                 | 11835894 | 2            | 302 | C:0.142384                    | T:0.857616     |
| chr28                                 | 11835919 | 2            | 302 | A:0.142384                    | G:0.857616     |
| chr28                                 | 11835996 | 2            | 306 | T:0.643791                    | A:0.356209     |
| chr28                                 | 11836065 | 2            | 308 | T:0.951299                    | C:0.0487013    |
| chr28                                 | 11836313 | 2            | 312 | A:0.833333                    |                |
| ATGAGAAAATATTTTTTTTTTTT:0.166667      |          |              |     |                               |                |
| chr28                                 | 11836403 | 2            | 308 | C:0.954545                    | T:0.0454545    |
| chr28                                 | 11836409 | 2            | 308 | A:0.506494                    | G:0.493506     |
| chr28                                 | 11836574 | 2            | 312 | T:0.935897                    | G:0.0641026    |
| chr28                                 | 11836609 | 2            | 308 | C:0.646104                    | A:0.353896     |
| chr28                                 | 11836733 | 2            | 304 | C:0.151316                    | T:0.848684     |

|       |          |   |     |                |                  |
|-------|----------|---|-----|----------------|------------------|
| chr28 | 11836800 | 2 | 310 | T:0.170968     | C:0.829032       |
| chr28 | 11836862 | 2 | 316 | G:0.161392     | A:0.838608       |
| chr28 | 11837006 | 2 | 308 | A:0.172078     | C:0.827922       |
| chr28 | 11837042 | 2 | 314 | A:0.681529     | T:0.318471       |
| chr28 | 11837067 | 2 | 314 | C:0.681529     | G:0.318471       |
| chr28 | 11837127 | 2 | 310 | A:0.187097     | C:0.812903       |
| chr28 | 11837136 | 2 | 306 | C:0.95098      | A:0.0490196      |
| chr28 | 11837245 | 2 | 312 | T:0.842949     | C:0.157051       |
| chr28 | 11837546 | 2 | 310 | T:0.670968     | C:0.329032       |
| chr28 | 11837672 | 2 | 304 | G:0.703947     | T:0.296053       |
| chr28 | 11837742 | 2 | 298 | A:0.687919     | G:0.312081       |
| chr28 | 11837794 | 2 | 302 | T:0.539735     | A:0.460265       |
| chr28 | 11837849 | 2 | 308 | A:0.155844     | G:0.844156       |
| chr28 | 11837878 | 2 | 300 | T:0.853333     | TA:0.146667      |
| chr28 | 11837879 | 2 | 304 | T:0.473684     | A:0.526316       |
| chr28 | 11838120 | 2 | 306 | G:0.69281      | A:0.30719        |
| chr28 | 11838205 | 2 | 310 | TAATG:0.690323 | T:0.309677       |
| chr28 | 11838398 | 2 | 306 | T:0.676471     | A:0.323529       |
| chr28 | 11838570 | 2 | 314 | A:0.175159     | G:0.824841       |
| chr28 | 11838777 | 2 | 306 | G:0.147059     | A:0.852941       |
| chr28 | 11838809 | 2 | 306 | ATC:0.95098    | A:0.0490196      |
| chr28 | 11838940 | 2 | 306 | A:0.156863     | G:0.843137       |
| chr28 | 11839043 | 2 | 300 | G:0.146667     | T:0.853333       |
| chr28 | 11839070 | 2 | 304 | A:0.157895     | G:0.842105       |
| chr28 | 11839158 | 2 | 306 | C:0.156863     | T:0.843137       |
| chr28 | 11839209 | 2 | 314 | T:0.171975     | TAAGA:0.828025   |
| chr28 | 11839356 | 2 | 306 | G:0.166667     | GA:0.833333      |
| chr28 | 11839467 | 2 | 308 | G:0.162338     | C:0.837662       |
| chr28 | 11840040 | 2 | 306 | T:0.666667     | C:0.333333       |
| chr28 | 11840100 | 2 | 300 | C:0.836667     | A:0.163333       |
| chr28 | 11840264 | 2 | 306 | G:0.539216     | A:0.460784       |
| chr28 | 11840358 | 2 | 304 | T:0.217105     | G:0.782895       |
| chr28 | 11840359 | 2 | 304 | A:0.217105     | G:0.782895       |
| chr28 | 11840463 | 2 | 316 | G:0.873418     | C:0.126582       |
| chr28 | 11841017 | 2 | 310 | AG:0.693548    | A:0.306452       |
| chr28 | 11841310 | 2 | 310 | T:0.132258     | C:0.867742       |
| chr28 | 11841644 | 2 | 308 | C:0.918831     | T:0.0811688      |
| chr28 | 11841865 | 2 | 302 | T:0.52649      | C:0.47351        |
| chr28 | 11841892 | 2 | 304 | A:0.930921     | G:0.0690789      |
| chr28 | 11841941 | 2 | 310 | G:0.970968     | A:0.0290323      |
| chr28 | 11841996 | 2 | 314 | C:0.130573     | T:0.869427       |
| chr28 | 11842065 | 2 | 308 | T:0.172078     | TTATATC:0.827922 |
| chr28 | 11842081 | 2 | 304 | A:0.980263     | G:0.0197368      |
| chr28 | 11842281 | 2 | 298 | TA:0.573826    | T:0.426174       |
| chr28 | 11842318 | 2 | 312 | C:0.13141      | A:0.86859        |
| chr28 | 11842384 | 2 | 298 | T:0.979866     | G:0.0201342      |
| chr28 | 11842436 | 2 | 306 | A:0.140523     | G:0.859477       |
| chr28 | 11842615 | 2 | 308 | T:0.142857     | C:0.857143       |
| chr28 | 11842801 | 2 | 298 | C:0.708054     | A:0.291946       |
| chr28 | 11842817 | 2 | 296 | G:0.841216     | A:0.158784       |
| chr28 | 11842837 | 2 | 296 | A:0.983108     | G:0.0168919      |
| chr28 | 11842919 | 2 | 306 | A:0.127451     | C:0.872549       |
| chr28 | 11842933 | 2 | 306 | T:0.823529     | A:0.176471       |
| chr28 | 11843043 | 2 | 302 | A:0.688742     | G:0.311258       |

|            |          |   |                |                      |                    |                |
|------------|----------|---|----------------|----------------------|--------------------|----------------|
| chr28      | 11843103 | 2 | 312            | G:0                  | GA:1               |                |
| chr28      | 11843108 | 2 | 312            | AT:0                 | A:1                |                |
| chr28      | 11843111 | 2 | 312            | G:0                  | A:1                |                |
| chr28      | 11843114 | 2 | 312            | AC:0                 | A:1                |                |
| chr28      | 11843120 | 2 | 312            | G:0                  | A:1                |                |
| chr28      | 11843121 | 2 | 312            | A:0                  | G:1                |                |
| chr28      | 11843135 | 2 | 312            | G:0                  | T:1                |                |
| chr28      | 11843136 | 2 | 312            | A:0                  | G:1                |                |
| chr28      | 11843151 | 2 | 312            | C:0                  | A:1                |                |
| chr28      | 11843152 | 2 | 312            | G:0                  | C:1                |                |
| chr28      | 11843216 | 2 | 312            | GC:0                 | G:1                |                |
| chr28      | 11843431 | 3 | 300            | G:0.606667           |                    | GA:0.22 GAA:   |
| 0.173333   |          |   |                |                      |                    |                |
| chr28      | 11843435 | 2 | 302            | A:0.837748           |                    | G:0.162252     |
| chr28      | 11843497 | 2 | 310            | C:0.46129            |                    | T:0.53871      |
| chr28      | 11843521 | 2 | 310            | A:0.845161           |                    | G:0.154839     |
| chr28      | 11843596 | 2 | 306            | C:0.79085            |                    | T:0.20915      |
| chr28      | 11843803 | 2 | 284            | T:0.816901           |                    | C:0.183099     |
| chr28      | 11843819 | 4 | 308            | CCTCTCTCTCTCTCTCTCT: | 0.175325           |                |
| C:0.227273 |          |   | CCTCT:0.311688 |                      | CCTCTCTCT:0.285714 |                |
| chr28      | 11843936 | 2 | 290            | G:0.848276           |                    | A:0.151724     |
| chr28      | 11844118 | 2 | 122            | C:0.704918           |                    | T:0.295082     |
| chr28      | 11844333 | 2 | 300            | C:0.156667           |                    | A:0.843333     |
| chr28      | 11844361 | 2 | 298            | AT:0.808725          |                    | A:0.191275     |
| chr28      | 11844447 | 2 | 302            | T:0.788079           |                    | G:0.211921     |
| chr28      | 11844576 | 2 | 316            | C:0.882911           |                    | CAAAA:0.117089 |
| chr28      | 11845066 | 2 | 230            | C:0.656522           |                    | T:0.343478     |
| chr28      | 11845187 | 2 | 214            | CA:0.602804          |                    | C:0.397196     |
| chr28      | 11845202 | 2 | 214            | C:0.602804           |                    | A:0.397196     |
| chr28      | 11845333 | 2 | 300            | A:0.846667           |                    | G:0.153333     |
| chr28      | 11845820 | 2 | 162            | T:0.851852           |                    | A:0.148148     |
| chr28      | 11845839 | 2 | 178            | A:0.179775           |                    | G:0.820225     |
| chr28      | 11845849 | 2 | 190            | T:0.957895           |                    | G:0.0421053    |
| chr28      | 11845940 | 2 | 302            | C:0.586093           |                    | T:0.413907     |
| chr28      | 11846050 | 2 | 126            | A:0.214286           |                    | G:0.785714     |
| chr28      | 11846163 | 2 | 304            | T:0.815789           |                    | G:0.184211     |
| chr28      | 11846225 | 2 | 308            | G:0.652597           |                    | A:0.347403     |
| chr28      | 11846457 | 2 | 306            | T:0.163399           |                    | G:0.836601     |
| chr28      | 11846915 | 2 | 300            | GT:0.843333          |                    | G:0.156667     |
| chr28      | 11846968 | 2 | 308            | G:0.451299           |                    | A:0.548701     |
| chr28      | 11847408 | 2 | 304            | G:0.121711           |                    | A:0.878289     |
| chr28      | 11847412 | 2 | 302            | C:0.440397           |                    | T:0.559603     |
| chr28      | 11847489 | 2 | 302            | A:0.625828           |                    | G:0.374172     |
| chr28      | 11847696 | 2 | 306            | G:0.614379           |                    | A:0.385621     |
| chr28      | 11847823 | 2 | 298            | T:0.694631           |                    | G:0.305369     |
| chr28      | 11848129 | 2 | 298            | T:0.758389           |                    | C:0.241611     |
| chr28      | 11848274 | 2 | 314            | A:0.83758            |                    | G:0.16242      |
| chr28      | 11848503 | 2 | 308            | TTTTTC:0.685065      |                    | T:0.314935     |
| chr28      | 11848581 | 2 | 294            | A:0.94898            |                    | C:0.0510204    |
| chr28      | 11849481 | 2 | 280            | C:0.875              | T:0.125            |                |
| chr28      | 11849660 | 2 | 304            | A:0.983553           |                    | T:0.0164474    |
| chr28      | 11849668 | 2 | 306            | A:0.748366           |                    | G:0.251634     |
| chr28      | 11849831 | 2 | 304            | A:0.430921           |                    | G:0.569079     |
| chr28      | 11850180 | 2 | 308            | T:0.266234           |                    | TA:0.733766    |

|                                   |          |   |     |                                |              |
|-----------------------------------|----------|---|-----|--------------------------------|--------------|
| chr28                             | 11850231 | 2 | 314 | T:0.140127                     | G:0.859873   |
| chr28                             | 11850436 | 2 | 296 | T:0.858108                     | TA:0.141892  |
| chr28                             | 11850510 | 2 | 306 | C:0.826797                     | G:0.173203   |
| chr28                             | 11850866 | 2 | 310 | G:0.980645                     | T:0.0193548  |
| chr28                             | 11851134 | 2 | 312 | G:0.823718                     | A:0.176282   |
| chr28                             | 11851149 | 2 | 298 | CT:0.469799                    | C:0.530201   |
| chr28                             | 11851158 | 2 | 302 | T:0.655629                     | A:0.344371   |
| chr28                             | 11851160 | 2 | 298 | A:0.704698                     | AT:0.295302  |
| chr28                             | 11851192 | 2 | 276 | A:0.518116                     | AAG:0.481884 |
| chr28                             | 11851261 | 2 | 280 | C:0.846429                     | T:0.153571   |
| chr28                             | 11851340 | 2 | 306 | C:0.898693                     | T:0.101307   |
| chr28                             | 11851374 | 2 | 300 | CA:0.943333                    | C:0.0566667  |
| chr28                             | 11851486 | 2 | 304 | G:0.986842                     | A:0.0131579  |
| chr28                             | 11851525 | 2 | 298 | T:0.14094                      | C:0.85906    |
| chr28                             | 11851613 | 2 | 312 | C:0.849359                     | T:0.150641   |
| chr28                             | 11851725 | 2 | 302 | T:0.738411                     | C:0.261589   |
| chr28                             | 11851797 | 2 | 300 | T:0.98 G:0.02                  |              |
| chr28                             | 11852005 | 2 | 306 | A:0.892157                     | T:0.107843   |
| chr28                             | 11852018 | 2 | 308 | A:0.282468                     | G:0.717532   |
| chr28                             | 11852216 | 2 | 294 | C:0.877551                     | T:0.122449   |
| chr28                             | 11852271 | 2 | 302 | C:0.52649                      | A:0.47351    |
| chr28                             | 11852326 | 2 | 306 | A:0.130719                     | G:0.869281   |
| chr28                             | 11852709 | 2 | 308 | T:0.279221                     | C:0.720779   |
| chr28                             | 11852752 | 2 | 308 | A:0.909091                     | G:0.0909091  |
| chr28                             | 11852785 | 2 | 310 | T:0.245161                     | A:0.754839   |
| chr28                             | 11853025 | 3 | 304 | CAA:0.161184                   | C:0.134868   |
| CA:0.703947                       |          |   |     |                                |              |
| chr28                             | 11853136 | 2 | 306 | C:0.856209                     | T:0.143791   |
| chr28                             | 11853296 | 2 | 308 | C:0.685065                     | A:0.314935   |
| chr28                             | 11853440 | 2 | 306 | T:0.124183                     | C:0.875817   |
| chr28                             | 11853526 | 2 | 304 | A:0.927632                     | G:0.0723684  |
| chr28                             | 11853567 | 2 | 308 | G:0.987013                     | A:0.012987   |
| chr28                             | 11853933 | 2 | 310 | A:0.674194                     | G:0.325806   |
| chr28                             | 11854146 | 2 | 306 | T:0.542484                     | G:0.457516   |
| chr28                             | 11854209 | 2 | 310 | G:0.654839                     | A:0.345161   |
| chr28                             | 11854354 | 2 | 304 | A:0.536184                     | G:0.463816   |
| chr28                             | 11854391 | 2 | 302 | G:0.927152                     | C:0.0728477  |
| chr28                             | 11854476 | 2 | 298 | TA:0.657718                    | T:0.342282   |
| chr28                             | 11854506 | 2 | 312 | C:0.673077                     | T:0.326923   |
| chr28                             | 11854642 | 2 | 302 | A:0.142384                     | T:0.857616   |
| chr28                             | 11854673 | 2 | 300 | T:0.7 A:0.3                    |              |
| chr28                             | 11854676 | 2 | 298 | A:0.627517                     | T:0.372483   |
| chr28                             | 11854708 | 2 | 304 | C:0.944079                     | A:0.0559211  |
| chr28                             | 11855104 | 2 | 314 | C:0.83121                      | T:0.16879    |
| chr28                             | 11855240 | 2 | 320 | TA:0.659375                    | T:0.340625   |
| chr28                             | 11855243 | 2 | 320 | CTCTATTTGTATATTTTGACAATCTATTT: |              |
| 0.659375 C:0.340625               |          |   |     |                                |              |
| chr28                             | 11855485 | 2 | 302 | TAA:0.864238                   | T:0.135762   |
| chr28                             | 11855489 | 2 | 298 | AAAAAATAAAATAAAAT:0.916107     |              |
| A:0.0838926                       |          |   |     |                                |              |
| chr28                             | 11855491 | 2 | 316 | A:0.490506                     | AT:0.509494  |
| chr28                             | 11855492 | 2 | 316 | AAAT:0.933544                  | A:0.0664557  |
| chr28                             | 11855495 | 3 | 316 | TAAAATAAAATAAAA:0.360759       | T:           |
| 0.129747 TAAAATAAAATAAAA:0.509494 |          |   |     |                                |              |

|       |            |     |               |                               |
|-------|------------|-----|---------------|-------------------------------|
| chr28 | 11855500 3 | 316 | TA:0.667722   | TAAA:0.0664557                |
|       | T:0.265823 |     |               |                               |
| chr28 | 11855501 2 | 316 | A:0.825949    | AAAT:0.174051                 |
| chr28 | 11855509 2 | 316 | A:0.490506    | T:0.509494                    |
| chr28 | 11855989 2 | 304 | A:0.894737    | G:0.105263                    |
| chr28 | 11856291 2 | 310 | G:0.703226    | A:0.296774                    |
| chr28 | 11856359 2 | 304 | C:0.608553    | A:0.391447                    |
| chr28 | 11856589 2 | 294 | T:0.972789    | C:0.0272109                   |
| chr28 | 11856689 2 | 300 | G:0.656667    | A:0.343333                    |
| chr28 | 11856771 2 | 304 | A:0.598684    | C:0.401316                    |
| chr28 | 11856801 2 | 300 | C:0.986667    | T:0.0133333                   |
| chr28 | 11856828 2 | 296 | C:0.983108    | T:0.0168919                   |
| chr28 | 11856850 2 | 302 | G:0.94702     | T:0.0529801                   |
| chr28 | 11856984 2 | 294 | C:0.911565    | T:0.0884354                   |
| chr28 | 11857174 2 | 294 | GA:0.163265   | G:0.836735                    |
| chr28 | 11857197 2 | 298 | G:0.946309    | A:0.0536913                   |
| chr28 | 11857306 2 | 306 | T:0.133987    | A:0.866013                    |
| chr28 | 11857441 2 | 310 | C:0.151613    | T:0.848387                    |
| chr28 | 11857656 2 | 306 | G:0.875817    | A:0.124183                    |
| chr28 | 11857712 2 | 296 | G:0.503378    | A:0.496622                    |
| chr28 | 11857887 2 | 304 | G:0.786184    | T:0.213816                    |
| chr28 | 11857896 2 | 298 | C:0.842282    | T:0.157718                    |
| chr28 | 11858000 2 | 298 | A:0.144295    | C:0.855705                    |
| chr28 | 11858084 2 | 306 | A:0.859477    | G:0.140523                    |
| chr28 | 11858194 2 | 300 | G:0.796667    | T:0.203333                    |
| chr28 | 11858610 2 | 302 | T:0.327815    | C:0.672185                    |
| chr28 | 11858912 2 | 308 | C:0.980519    | T:0.0194805                   |
| chr28 | 11859084 2 | 304 | C:0.819079    | A:0.180921                    |
| chr28 | 11859194 2 | 300 | C:0.85 T:0.15 |                               |
| chr28 | 11859376 2 | 308 | C:0.808442    | T:0.191558                    |
| chr28 | 11859705 2 | 310 | ATTT:0.345161 | A:0.654839                    |
| chr28 | 11859712 2 | 308 | C:0.961039    | T:0.038961                    |
| chr28 | 11859833 2 | 282 | T:0.343972    | TA:0.656028                   |
| chr28 | 11859960 2 | 296 | A:0.692568    | T:0.307432                    |
| chr28 | 11860041 2 | 302 | T:0.483444    | C:0.516556                    |
| chr28 | 11860201 2 | 298 | CAT:0.828859  | C:0.171141                    |
| chr28 | 11860909 2 | 302 | C:0.523179    | A:0.476821                    |
| chr28 | 11861144 2 | 316 | G:0.971519    | GTAAAA:0.028481               |
| chr28 | 11861147 2 | 316 | G:0.971519    | GA:0.028481                   |
| chr28 | 11861148 2 | 316 | T:0.971519    | TAATCTTTTATCTAGG:<br>0.028481 |
| chr28 | 11861292 2 | 298 | T:0.942953    | C:0.057047                    |
| chr28 | 11861299 2 | 296 | C:0.962838    | CT:0.0371622                  |
| chr28 | 11861520 2 | 312 | C:0.833333    | G:0.166667                    |
| chr28 | 11862021 2 | 292 | C:0.136986    | T:0.863014                    |
| chr28 | 11862382 2 | 308 | A:0.821429    | G:0.178571                    |
| chr28 | 11862419 2 | 296 | G:0.638514    | T:0.361486                    |
| chr28 | 11862432 2 | 284 | A:0.711268    | C:0.288732                    |
| chr28 | 11862474 2 | 288 | A:0.826389    | G:0.173611                    |
| chr28 | 11862665 2 | 304 | GA:0.996711   | G:0.00328947                  |
| chr28 | 11862708 2 | 300 | TG:0.803333   | T:0.196667                    |
| chr28 | 11862852 2 | 304 | A:0.131579    | G:0.868421                    |
| chr28 | 11863064 2 | 298 | G:0.969799    | C:0.0302013                   |
| chr28 | 11863087 2 | 306 | G:0.130719    | A:0.869281                    |

|                                             |            |                         |                    |                      |
|---------------------------------------------|------------|-------------------------|--------------------|----------------------|
| chr28                                       | 11863317 2 | 308                     | TCAA:0.853896      | T:0.146104           |
| chr28                                       | 11863409 5 | 312                     | AAG:0.230769       | A:0.153846           |
| AAGAGAG:0.169872                            |            | AAGAGAGAG:0.333333      |                    | AAGAGAGAGAG:0.112179 |
| chr28                                       | 11863543 2 | 304                     | T:0.151316         | G:0.848684           |
| chr28                                       | 11863601 2 | 310                     | C:0.858065         | A:0.141935           |
| chr28                                       | 11863735 2 | 308                     | C:0.987013         | T:0.012987           |
| chr28                                       | 11863841 2 | 302                     | C:0.480132         | T:0.519868           |
| chr28                                       | 11863912 2 | 306                     | T:0.470588         | C:0.529412           |
| chr28                                       | 11864152 2 | 300                     | A:0.466667         | G:0.533333           |
| chr28                                       | 11864492 2 | 312                     | A:0.823718         | G:0.176282           |
| chr28                                       | 11864653 2 | 308                     | A:0.892857         | T:0.107143           |
| chr28                                       | 11864859 2 | 304                     | C:0.161184         | CCT:0.838816         |
| chr28                                       | 11865229 2 | 300                     | T:0.636667         | C:0.363333           |
| chr28                                       | 11865376 2 | 302                     | C:0.817881         | G:0.182119           |
| chr28                                       | 11865467 2 | 258                     | TAGA:0.70155       | T:0.29845            |
| chr28                                       | 11865607 4 | 318                     | C:0.292453         | CTGTGTG:0.166667     |
| CTGTGTGTGTG:0.106918                        |            | CTGTGTGTGTGTG:0.433962  |                    |                      |
| chr28                                       | 11865639 2 | 316                     | C:0.563291         | G:0.436709           |
| chr28                                       | 11865677 2 | 318                     | A:0.688679         | AAATG:0.311321       |
| chr28                                       | 11865679 2 | 308                     | ATAAATAAG:0.477273 | A:                   |
| 0.522727                                    |            |                         |                    |                      |
| chr28                                       | 11865687 2 | 318                     | G:0.688679         | A:0.311321           |
| chr28                                       | 11865692 3 | 318                     | CAAAT:0.663522     | C:0.0251572          |
| TAAAT:0.311321                              |            |                         |                    |                      |
| chr28                                       | 11865704 4 | 318                     | T:0.688679         | TAAATA:0.110063      |
| TAAATAAATA:0.100629                         |            | TAAATAAATAAATA:0.100629 |                    |                      |
| chr28                                       | 11865794 2 | 286                     | C:0.947552         | T:0.0524476          |
| chr28                                       | 11866188 2 | 306                     | T:0.964052         | C:0.0359477          |
| chr28                                       | 11866467 2 | 306                     | G:0.133987         | A:0.866013           |
| chr28                                       | 11866651 2 | 310                     | C:0.125806         | G:0.874194           |
| chr28                                       | 11866749 2 | 280                     | G:0.253571         | GA:0.746429          |
| chr28                                       | 11866946 2 | 240                     | ATTAAT:0.7875      | A:0.2125             |
| chr28                                       | 11866955 2 | 284                     | A:0.81338          | ATTTAT:0.18662       |
| chr28                                       | 11867008 2 | 208                     | C:0.764423         | T:0.235577           |
| chr28                                       | 11867265 2 | 298                     | C:0.946309         | A:0.0536913          |
| chr28                                       | 11867606 2 | 308                     | C:0.746753         | T:0.253247           |
| chr28                                       | 11867663 2 | 302                     | A:0.854305         | C:0.145695           |
| chr28                                       | 11867677 2 | 304                     | C:0.967105         | T:0.0328947          |
| chr28                                       | 11868484 2 | 314                     | ATATACT:0.936306   | A:0.0636943          |
| chr28                                       | 11868566 2 | 302                     | T:0.715232         | C:0.284768           |
| chr28                                       | 11868609 2 | 298                     | G:0.973154         | A:0.0268456          |
| chr28                                       | 11868894 2 | 304                     | T:0.476974         | TG:0.523026          |
| chr28                                       | 11868900 2 | 304                     | ATC:0.476974       | A:0.523026           |
| chr28                                       | 11868905 2 | 304                     | T:0.476974         |                      |
| TCAGACCATGAGGTATATCAAATTAGATGTGGCA:0.523026 |            |                         |                    |                      |
| chr28                                       | 11869415 2 | 310                     | G:0.980645         | A:0.0193548          |
| chr28                                       | 11869471 2 | 308                     | C:0.633117         | T:0.366883           |
| chr28                                       | 11869604 2 | 292                     | C:0.928082         | G:0.0719178          |
| chr28                                       | 11869666 2 | 302                     | A:0.533113         | AT:0.466887          |
| chr28                                       | 11869801 2 | 310                     | CT:0.119355        | C:0.880645           |
| chr28                                       | 11869826 2 | 312                     | C:0.967949         | T:0.0320513          |
| chr28                                       | 11869857 2 | 304                     | A:0.523026         | C:0.476974           |
| chr28                                       | 11870017 2 | 300                     | A:0.776667         | AT:0.223333          |
| chr28                                       | 11870084 2 | 302                     | T:0.536424         | C:0.463576           |



|                         |          |                                |     |              |                |
|-------------------------|----------|--------------------------------|-----|--------------|----------------|
| chr28                   | 11870558 | 2                              | 292 | CA:0.140411  | C:0.859589     |
| chr28                   | 11870749 | 2                              | 296 | T:0.837838   | TC:0.162162    |
| chr28                   | 11870751 | 2                              | 294 | C:0.591837   | CG:0.408163    |
| chr28                   | 11870758 | 4                              | 306 | C:0.51634    | CAA:0.0620915  |
| CCCCAAA:0.183007        |          | CCCCAAA:0.238562               |     |              |                |
| chr28                   | 11870817 | 2                              | 296 | G:0.547297   | A:0.452703     |
| chr28                   | 11870859 | 2                              | 294 | G:0.969388   | A:0.0306122    |
| chr28                   | 11871195 | 2                              | 318 | G:0.946541   | A:0.0534591    |
| chr28                   | 11871288 | 2                              | 304 | A:0.986842   | G:0.0131579    |
| chr28                   | 11871939 | 2                              | 304 | C:0.615132   | CAAAA:0.384868 |
| chr28                   | 11871970 | 2                              | 306 | G:0.53268    | A:0.46732      |
| chr28                   | 11872004 | 2                              | 312 | G:0.125      | T:0.875        |
| chr28                   | 11872102 | 3                              | 298 | GTT:0.35906  | G:0.302013     |
| GTTT:0.338926           |          |                                |     |              |                |
| chr28                   | 11872114 | 2                              | 294 | T:0.802721   | A:0.197279     |
| chr28                   | 11872115 | 3                              | 298 | T:0.486577   | A:0.211409     |
| TAAA:0.302013           |          |                                |     |              |                |
| chr28                   | 11872116 | 2                              | 296 | A:0.658784   | T:0.341216     |
| chr28                   | 11872293 | 4                              | 296 | GTT:0.253378 | G:0.293919     |
| GT:0.0777027            |          | GTTT:0.375                     |     |              |                |
| chr28                   | 11872329 | 2                              | 302 | C:0.615894   | G:0.384106     |
| chr28                   | 11872333 | 2                              | 304 | C:0.950658   | T:0.0493421    |
| chr28                   | 11872600 | 2                              | 312 | G:0.641026   | GA:0.358974    |
| chr28                   | 11873067 | 2                              | 310 | A:0.348387   | AGT:0.651613   |
| chr28                   | 11873070 | 4                              | 314 | A:0.16879    | ATAG:0.210191  |
| ATAGTATAGTATAG:0.442675 |          | ATATAGTATAGTATAGTATAG:0.178344 |     |              |                |
| chr28                   | 11873397 | 2                              | 312 | T:0.137821   | C:0.862179     |
| chr28                   | 11873413 | 2                              | 310 | C:0.919355   | T:0.0806452    |
| chr28                   | 11873422 | 2                              | 312 | T:0.137821   | C:0.862179     |
| chr28                   | 11873476 | 2                              | 302 | G:0.976821   | A:0.0231788    |
| chr28                   | 11873785 | 2                              | 308 | A:0.99026    | G:0.00974026   |
| chr28                   | 11873991 | 2                              | 312 | T:0.839744   | A:0.160256     |
| chr28                   | 11874303 | 2                              | 302 | A:0.801325   | C:0.198675     |
| chr28                   | 11874403 | 2                              | 304 | T:0.141447   | TC:0.858553    |
| chr28                   | 11874613 | 2                              | 296 | C:0.719595   | T:0.280405     |
| chr28                   | 11874662 | 2                              | 296 | C:0.138514   | G:0.861486     |
| chr28                   | 11874841 | 2                              | 308 | G:0.62987    | A:0.37013      |
| chr28                   | 11874853 | 2                              | 304 | T:0.973684   | C:0.0263158    |
| chr28                   | 11875008 | 2                              | 300 | CA:0.786667  | C:0.213333     |
| chr28                   | 11875013 | 2                              | 310 | A:0.687097   | AAC:0.312903   |
| chr28                   | 11875034 | 2                              | 314 | AC:0.843949  | A:0.156051     |
| chr28                   | 11875039 | 2                              | 310 | AC:0.919355  | A:0.0806452    |
| chr28                   | 11875040 | 3                              | 318 | C:0.902516   | A:0.081761     |
| CAAA:0.0157233          |          |                                |     |              |                |
| chr28                   | 11875046 | 2                              | 314 | ACC:0.506369 | A:0.493631     |
| chr28                   | 11875047 | 2                              | 316 | C:0.756329   | A:0.243671     |
| chr28                   | 11875048 | 3                              | 318 | C:0.735849   | CAAA:0.091195  |
| CAAAAAAAAA:0.172956     |          |                                |     |              |                |
| chr28                   | 11875329 | 2                              | 310 | C:0.625806   | CT:0.374194    |
| chr28                   | 11875353 | 2                              | 314 | G:0.178344   | C:0.821656     |
| chr28                   | 11875472 | 2                              | 300 | G:0.616667   | A:0.383333     |
| chr28                   | 11875746 | 2                              | 304 | G:0.963816   | A:0.0361842    |
| chr28                   | 11875928 | 2                              | 310 | A:0.651613   | G:0.348387     |
| chr28                   | 11876735 | 2                              | 306 | C:0.70915    | T:0.29085      |

|                         |            |     |               |             |
|-------------------------|------------|-----|---------------|-------------|
| chr28                   | 11876758 2 | 302 | A:0.695364    | AT:0.304636 |
| chr28                   | 11876893 2 | 296 | A:0.432432    | AT:0.567568 |
| chr28                   | 11877045 2 | 296 | T:0.381757    | C:0.618243  |
| chr28                   | 11877356 2 | 306 | T:0.447712    | C:0.552288  |
| chr28                   | 11877566 2 | 310 | C:0.970968    | T:0.0290323 |
| chr28                   | 11877714 2 | 304 | A:0.953947    | G:0.0460526 |
| chr28                   | 11877788 2 | 302 | AT:0.440397   | A:0.559603  |
| chr28                   | 11877919 2 | 300 | G:0.783333    | A:0.216667  |
| chr28                   | 11878099 2 | 310 | C:0.435484    | T:0.564516  |
| chr28                   | 11878140 2 | 312 | T:0.948718    | C:0.0512821 |
| chr28                   | 11878157 2 | 310 | A:0.151613    | G:0.848387  |
| chr28                   | 11878380 2 | 310 | C:0.806452    | T:0.193548  |
| chr28                   | 11878898 2 | 304 | TC:0.634868   | T:0.365132  |
| chr28                   | 11878899 2 | 304 | C:0.822368    | T:0.177632  |
| chr28                   | 11878981 2 | 302 | A:0.94702     | G:0.0529801 |
| chr28                   | 11879372 2 | 300 | G:0.473333    | A:0.526667  |
| chr28                   | 11879468 2 | 300 | T:0           | C:1         |
| chr28                   | 11879520 2 | 292 | C:0           | T:1         |
| chr28                   | 11879527 2 | 292 | C:0           | T:1         |
| chr28                   | 11879532 2 | 292 | C:0           | T:1         |
| chr28                   | 11879539 2 | 292 | TG:0          | T:1         |
| chr28                   | 11879542 2 | 292 | G:0           | GT:1        |
| chr28                   | 11879590 2 | 284 | G:0           | T:1         |
| chr28                   | 11879696 2 | 212 | A:0.962264    | G:0.0377358 |
| chr28                   | 11879839 2 | 280 | TA:0.825      | T:0.175     |
| chr28                   | 11879919 2 | 306 | C:0.816993    | T:0.183007  |
| chr28                   | 11880140 2 | 312 | T:0.439103    | G:0.560897  |
| chr28                   | 11880412 2 | 306 | AG:0          | A:1         |
| chr28                   | 11880549 2 | 302 | AT:0.933775   | A:0.0662252 |
| chr28                   | 11880555 2 | 304 | T:0.430921    | G:0.569079  |
| chr28                   | 11881779 2 | 288 | G:0.774306    | A:0.225694  |
| chr28                   | 11881837 2 | 296 | C:0.72973     | T:0.27027   |
| chr28                   | 11882344 2 | 308 | G:0.737013    | T:0.262987  |
| chr28                   | 11882615 2 | 300 | T:0.693333    | C:0.306667  |
| chr28                   | 11883074 2 | 306 | G:0.957516    | C:0.0424837 |
| chr28                   | 11883409 2 | 306 | G:0.722222    | A:0.277778  |
| chr28                   | 11883866 2 | 302 | G:0.970199    | T:0.0298013 |
| chr28                   | 11883981 2 | 312 | T:0.695513    | A:0.304487  |
| chr28                   | 11884006 2 | 304 | G:0.973684    | T:0.0263158 |
| chr28                   | 11884147 2 | 312 | G:0.807692    | A:0.192308  |
| chr28                   | 11884208 2 | 312 | C:0.945513    | T:0.0544872 |
| chr28                   | 11884563 2 | 298 | A:0.402685    | G:0.597315  |
| chr28                   | 11885008 2 | 310 | G:0.735484    | A:0.264516  |
| chr28                   | 11885048 2 | 308 | C:0.980519    | T:0.0194805 |
| chr28                   | 11885990 2 | 298 | C:0.714765    | T:0.285235  |
| chr28                   | 11886152 2 | 256 | GAT:0.871094  | G:0.128906  |
| chr28                   | 11886155 2 | 256 | C:0.871094    | CA:0.128906 |
| chr28                   | 11886315 2 | 296 | ATTT:0.763514 | A:0.236486  |
| chr28                   | 11886318 3 | 296 | T:0.506757    | A:0.256757  |
| TAAAAAAAAAAAAA:0.236486 |            |     |               |             |
| chr28                   | 11886414 2 | 298 | G:0.687919    | A:0.312081  |
| chr28                   | 11886615 2 | 310 | G:0.412903    | T:0.587097  |
| chr28                   | 11887045 2 | 306 | T:0.477124    | TA:0.522876 |
| chr28                   | 11887409 2 | 314 | T:0.815287    | C:0.184713  |

|                              |          |   |     |                              |              |
|------------------------------|----------|---|-----|------------------------------|--------------|
| chr28                        | 11887582 | 2 | 306 | G:0.75817                    | A:0.24183    |
| chr28                        | 11887973 | 2 | 310 | C:0.96129                    | T:0.0387097  |
| chr28                        | 11888154 | 2 | 308 | C:0.483766                   | T:0.516234   |
| chr28                        | 11888210 | 2 | 312 | G:0.980769                   | A:0.0192308  |
| chr28                        | 11888556 | 2 | 298 | C:0.812081                   | G:0.187919   |
| chr28                        | 11888695 | 2 | 306 | C:0.941176                   | A:0.0588235  |
| chr28                        | 11889398 | 2 | 274 | C:0.759124                   | T:0.240876   |
| chr28                        | 11889609 | 2 | 300 | G:0.973333                   | A:0.0266667  |
| chr28                        | 11890634 | 2 | 300 | G:0.996667                   | T:0.00333333 |
| chr28                        | 11890884 | 2 | 312 | A:0.932692                   | G:0.0673077  |
| chr28                        | 11891477 | 2 | 306 | C:0.493464                   | G:0.506536   |
| chr28                        | 11891523 | 2 | 308 | A:0.961039                   | G:0.038961   |
| chr28                        | 11891537 | 2 | 308 | C:0.782468                   | T:0.217532   |
| chr28                        | 11892124 | 2 | 312 | G:0.983974                   | C:0.0160256  |
| chr28                        | 11892190 | 2 | 312 | C:0.926282                   | T:0.0737179  |
| chr28                        | 11892692 | 2 | 314 | AG:0.977707                  | A:0.022293   |
| chr28                        | 11892694 | 2 | 314 | C:0.977707                   | T:0.022293   |
| chr28                        | 11893064 | 2 | 312 | A:0.769231                   | G:0.230769   |
| chr28                        | 11893084 | 2 | 312 | G:0.878205                   | C:0.121795   |
| chr28                        | 11893095 | 2 | 310 | C:0.929032                   | A:0.0709677  |
| chr28                        | 11893182 | 2 | 304 | GA:0.444079                  | G:0.555921   |
| chr28                        | 11893201 | 2 | 306 | G:0.470588                   | A:0.529412   |
| chr28                        | 11893257 | 2 | 304 | A:0.473684                   | G:0.526316   |
| chr28                        | 11893458 | 2 | 302 | G:0.798013                   | C:0.201987   |
| chr28                        | 11893603 | 2 | 306 | C:0.918301                   | T:0.0816993  |
| chr28                        | 11894628 | 2 | 302 | C:0.460265                   | T:0.539735   |
| chr28                        | 11895309 | 2 | 306 | T:0.382353                   | C:0.617647   |
| chr28                        | 11896364 | 2 | 310 | C:0.935484                   | T:0.0645161  |
| chr28                        | 11897117 | 2 | 310 | TCCTAAGC:0.751613            | T:           |
| 0.248387                     |          |   |     |                              |              |
| chr28                        | 11897146 | 2 | 306 | A:0.843137                   | G:0.156863   |
| chr28                        | 11897231 | 2 | 304 | T:0.496711                   | G:0.503289   |
| chr28                        | 11897412 | 2 | 296 | AT:0.966216                  | A:0.0337838  |
| chr28                        | 11897471 | 2 | 300 | C:0.843333                   | T:0.156667   |
| chr28                        | 11897491 | 2 | 300 | A:0.843333                   | C:0.156667   |
| chr28                        | 11897718 | 2 | 282 | G:0.851064                   | A:0.148936   |
| chr28                        | 11897838 | 2 | 302 | A:0.145695                   | T:0.854305   |
| chr28                        | 11898077 | 2 | 268 | C:0.865672                   | T:0.134328   |
| chr28                        | 11898115 | 2 | 266 | C:0.902256                   | T:0.0977444  |
| chr28                        | 11898121 | 2 | 310 | AATATATATATATATATAT:0.212903 |              |
| A:0.787097                   |          |   |     |                              |              |
| chr28                        | 11898593 | 2 | 248 | ATG:0.774194                 | A:0.225806   |
| chr28                        | 11898597 | 3 | 300 | G:0.62 GTA:0.2               | GTATA:0.18   |
| chr28                        | 11898767 | 2 | 306 | G:0.784314                   | A:0.215686   |
| chr28                        | 11898859 | 2 | 296 | G:0.831081                   | A:0.168919   |
| chr28                        | 11899659 | 2 | 310 | G:0.774194                   | A:0.225806   |
| chr28                        | 11899683 | 2 | 304 | A:0.9375 G:0.0625            |              |
| chr28                        | 11899909 | 2 | 302 | A:0.956954                   | T:0.0430464  |
| chr28                        | 11900076 | 2 | 306 | G:0.882353                   | A:0.117647   |
| chr28                        | 11900354 | 2 | 300 | A:0.99 T:0.01                |              |
| chr28                        | 11900702 | 2 | 300 | C:0.843333                   | CT:0.156667  |
| chr28                        | 11900739 | 2 | 300 | CT:0.946667                  | C:0.0533333  |
| chr28                        | 11900952 | 4 | 296 | GAAA:0.307432                | G:0.121622   |
| GAA:0.243243 GAAAAA:0.327703 |          |   |     |                              |              |

|                                   |            |     |                 |               |
|-----------------------------------|------------|-----|-----------------|---------------|
| chr28                             | 11900971 2 | 288 | A:0.885417      | T:0.114583    |
| chr28                             | 11901038 2 | 284 | T:0.524648      | G:0.475352    |
| chr28                             | 11901103 4 | 292 | C:0.636986      | CCT:0.195205  |
| CCTCT:0.0719178 CCTCTCT:0.0958904 |            |     |                 |               |
| chr28                             | 11901139 2 | 290 | AAAT:0.882759   | A:0.117241    |
| chr28                             | 11901142 2 | 288 | T:0.944444      | TA:0.0555556  |
| chr28                             | 11901145 2 | 296 | A:0.935811      | ATT:0.0641892 |
| chr28                             | 11901490 2 | 304 | G:0.957237      | C:0.0427632   |
| chr28                             | 11901529 2 | 310 | G:0.948387      | A:0.0516129   |
| chr28                             | 11901609 2 | 304 | G:0.493421      | A:0.506579    |
| chr28                             | 11901648 2 | 302 | T:0.0728477     | C:0.927152    |
| chr28                             | 11901796 2 | 314 | C:0.490446      | T:0.509554    |
| chr28                             | 11901801 2 | 314 | A:0.156051      | T:0.843949    |
| chr28                             | 11902561 2 | 306 | G:0.683007      | A:0.316993    |
| chr28                             | 11902834 2 | 310 | A:0.154839      | G:0.845161    |
| chr28                             | 11902875 2 | 318 | T:0.767296      | TTTTCTTTC:    |
| 0.232704                          |            |     |                 |               |
| chr28                             | 11903577 2 | 300 | G:0.976667      | A:0.0233333   |
| chr28                             | 11904397 2 | 302 | A:0.572848      | G:0.427152    |
| chr28                             | 11904411 2 | 306 | G:0.732026      | GA:0.267974   |
| chr28                             | 11904423 2 | 306 | T:0.732026      | TG:0.267974   |
| chr28                             | 11904429 2 | 300 | A:0.37 G:0.63   |               |
| chr28                             | 11904966 2 | 300 | T:0.76 G:0.24   |               |
| chr28                             | 11905046 2 | 316 | A:0.737342      | G:0.262658    |
| chr28                             | 11905088 2 | 312 | A:0.926282      | AT:0.0737179  |
| chr28                             | 11905201 2 | 294 | C:0.119048      | G:0.880952    |
| chr28                             | 11905204 2 | 294 | C:0.748299      | T:0.251701    |
| chr28                             | 11905287 2 | 300 | T:0.41 A:0.59   |               |
| chr28                             | 11905538 2 | 304 | G:0.371711      | A:0.628289    |
| chr28                             | 11905562 2 | 312 | C:0.753205      | A:0.246795    |
| chr28                             | 11905567 2 | 312 | G:0.753205      | A:0.246795    |
| chr28                             | 11905695 2 | 308 | T:0.948052      | A:0.0519481   |
| chr28                             | 11905737 2 | 306 | GA:0.947712     | G:0.0522876   |
| chr28                             | 11905896 2 | 308 | AAC:0.75 A:0.25 |               |
| chr28                             | 11905908 2 | 304 | C:0.404605      | A:0.595395    |
| chr28                             | 11906048 2 | 308 | G:0.694805      | C:0.305195    |
| chr28                             | 11906064 2 | 308 | T:0.103896      | G:0.896104    |
| chr28                             | 11906235 2 | 294 | C:0.683673      | A:0.316327    |
| chr28                             | 11906252 2 | 300 | A:0.68 T:0.32   |               |
| chr28                             | 11906403 2 | 306 | A:0.931373      | G:0.0686275   |
| chr28                             | 11906470 2 | 314 | A:0.684713      | G:0.315287    |
| chr28                             | 11906582 2 | 302 | G:0.950331      | C:0.0496689   |
| chr28                             | 11906587 2 | 300 | A:0.71 G:0.29   |               |
| chr28                             | 11906709 2 | 296 | A:0.689189      | G:0.310811    |
| chr28                             | 11906993 2 | 310 | T:0.687097      | C:0.312903    |
| chr28                             | 11907074 2 | 308 | T:0.678571      | TC:0.321429   |
| chr28                             | 11907188 2 | 298 | C:0.959732      | T:0.0402685   |
| chr28                             | 11907338 2 | 308 | AC:0.672078     | A:0.327922    |
| chr28                             | 11907340 2 | 308 | A:0.672078      | T:0.327922    |
| chr28                             | 11907516 2 | 312 | T:0.967949      | C:0.0320513   |
| chr28                             | 11907594 2 | 302 | G:0.417219      | A:0.582781    |
| chr28                             | 11907854 2 | 300 | GAAC:0.123333   | G:0.876667    |
| chr28                             | 11908150 2 | 310 | T:0.870968      | A:0.129032    |
| chr28                             | 11908333 2 | 312 | A:0.294872      | G:0.705128    |

|                                 |          |   |     |                            |                   |
|---------------------------------|----------|---|-----|----------------------------|-------------------|
| chr28                           | 11908483 | 2 | 308 | A:0.701299                 | C:0.298701        |
| chr28                           | 11908607 | 2 | 310 | A:0.796774                 | G:0.203226        |
| chr28                           | 11908661 | 2 | 304 | CT:0.973684                | C:0.0263158       |
| chr28                           | 11908670 | 2 | 304 | TA:0.786184                | T:0.213816        |
| chr28                           | 11908671 | 2 | 302 | A:0.844371                 | T:0.155629        |
| chr28                           | 11908792 | 2 | 296 | C:0.787162                 | T:0.212838        |
| chr28                           | 11908821 | 2 | 302 | C:0.794702                 | G:0.205298        |
| chr28                           | 11908827 | 2 | 302 | C:0.794702                 | T:0.205298        |
| chr28                           | 11909091 | 2 | 298 | C:0.791946                 | T:0.208054        |
| chr28                           | 11909359 | 2 | 302 | G:0.81457                  | GTGAA:0.18543     |
| chr28                           | 11909966 | 2 | 306 | TGA:0.614379               | T:0.385621        |
| chr28                           | 11910739 | 2 | 318 | C:0.562893                 |                   |
| CAAATATAAAAAATATAAAAAA:0.437107 |          |   |     |                            |                   |
| chr28                           | 11910742 | 2 | 318 | C:0.562893                 | CAAAAAAT:0.437107 |
| chr28                           | 11910910 | 2 | 312 | G:0.310897                 | C:0.689103        |
| chr28                           | 11911220 | 2 | 312 | CTG:0.935897               | C:0.0641026       |
| chr28                           | 11911433 | 2 | 300 | G:0.313333                 | T:0.686667        |
| chr28                           | 11911657 | 2 | 302 | C:0.970199                 | T:0.0298013       |
| chr28                           | 11912001 | 3 | 290 | CTT:0.562069               | C:0.0724138       |
| CT:0.365517                     |          |   |     |                            |                   |
| chr28                           | 11912002 | 2 | 304 | T:0.759868                 | TC:0.240132       |
| chr28                           | 11912028 | 2 | 286 | C:0.304196                 | T:0.695804        |
| chr28                           | 11912031 | 2 | 286 | T:0.304196                 | C:0.695804        |
| chr28                           | 11912299 | 2 | 320 | C:0.95625                  | T:0.04375         |
| chr28                           | 11912379 | 2 | 320 | G:0.896875                 | GTC:0.103125      |
| chr28                           | 11912395 | 2 | 320 | C:0.984375                 | G:0.015625        |
| chr28                           | 11912418 | 2 | 318 | TAAA:0.893082              | T:0.106918        |
| chr28                           | 11912629 | 2 | 304 | A:0.694079                 | G:0.305921        |
| chr28                           | 11912867 | 2 | 308 | T:0.961039                 | C:0.038961        |
| chr28                           | 11912928 | 2 | 306 | A:0.728758                 | C:0.271242        |
| chr28                           | 11912964 | 2 | 306 | T:0.156863                 | TTGA:0.843137     |
| chr28                           | 11913368 | 2 | 296 | T:0.314189                 | A:0.685811        |
| chr28                           | 11913502 | 2 | 306 | T:0.303922                 | A:0.696078        |
| chr28                           | 11913526 | 2 | 310 | C:0.303226                 | T:0.696774        |
| chr28                           | 11913869 | 2 | 304 | C:0.694079                 | T:0.305921        |
| chr28                           | 11914247 | 2 | 306 | A:0.313725                 | T:0.686275        |
| chr28                           | 11914547 | 2 | 298 | CTTT:0.748322              | C:0.251678        |
| chr28                           | 11914566 | 3 | 298 | TAAG:0.634228              | T:0.107383        |
| AAAG:0.258389                   |          |   |     |                            |                   |
| chr28                           | 11914575 | 2 | 286 | T:0.311189                 | C:0.688811        |
| chr28                           | 11914582 | 2 | 286 | T:0.311189                 | TAGAC:0.688811    |
| chr28                           | 11914621 | 2 | 298 | C:0.724832                 | G:0.275168        |
| chr28                           | 11914627 | 2 | 298 | T:0.724832                 | C:0.275168        |
| chr28                           | 11914642 | 2 | 298 | C:0.724832                 | G:0.275168        |
| chr28                           | 11914711 | 2 | 304 | C:0.907895                 | T:0.0921053       |
| chr28                           | 11915125 | 2 | 300 | G:0.273333                 | A:0.726667        |
| chr28                           | 11915222 | 2 | 314 | CTCTTACTCTTAGACCT:0.318471 |                   |
| C:0.681529                      |          |   |     |                            |                   |
| chr28                           | 11915267 | 2 | 304 | T:0.355263                 | A:0.644737        |
| chr28                           | 11915465 | 2 | 308 | A:0.305195                 | G:0.694805        |
| chr28                           | 11915522 | 2 | 300 | G:0.993333                 | T:0.00666667      |
| chr28                           | 11915639 | 2 | 300 | G:0.266667                 | A:0.733333        |
| chr28                           | 11915812 | 2 | 310 | G:0.290323                 | A:0.709677        |
| chr28                           | 11915856 | 2 | 304 | T:0.766447                 | A:0.233553        |

|                                 |          |   |     |                      |                |
|---------------------------------|----------|---|-----|----------------------|----------------|
| chr28                           | 11916054 | 2 | 280 | A:0.296429           | G:0.703571     |
| chr28                           | 11916275 | 2 | 278 | G:0.97482            | A:0.0251799    |
| chr28                           | 11916371 | 2 | 290 | T:0.403448           | G:0.596552     |
| chr28                           | 11916624 | 2 | 304 | C:0.944079           | T:0.0559211    |
| chr28                           | 11916653 | 2 | 308 | T:0.961039           | C:0.038961     |
| chr28                           | 11916841 | 2 | 294 | A:0.965986           | G:0.0340136    |
| chr28                           | 11918348 | 2 | 164 | G:0.542683           | A:0.457317     |
| chr28                           | 11918457 | 2 | 262 | TA:0.736641          | T:0.263359     |
| chr28                           | 11918523 | 2 | 290 | G:0.724138           | GTT:0.275862   |
| chr28                           | 11919089 | 2 | 306 | C:0.892157           | T:0.107843     |
| chr28                           | 11919381 | 2 | 270 | A:0.374074           | G:0.625926     |
| chr28                           | 11919506 | 3 | 312 | GGTGTGTGTGT:0.471154 | G:             |
| 0.282051 GGTGTGTGTGTGT:0.246795 |          |   |     |                      |                |
| chr28                           | 11920706 | 2 | 312 | CT:0.801282          | C:0.198718     |
| chr28                           | 11921527 | 2 | 296 | G:0.773649           | A:0.226351     |
| chr28                           | 11922160 | 2 | 304 | GA:0.990132          | G:0.00986842   |
| chr28                           | 11922375 | 2 | 296 | A:0.702703           | T:0.297297     |
| chr28                           | 11922483 | 2 | 312 | C:0.971154           | T:0.0288462    |
| chr28                           | 11922543 | 2 | 302 | C:0.950331           | T:0.0496689    |
| chr28                           | 11922905 | 2 | 304 | A:0.967105           | G:0.0328947    |
| chr28                           | 11923553 | 2 | 304 | G:0.378289           | C:0.621711     |
| chr28                           | 11924130 | 2 | 310 | A:0.73871            | G:0.26129      |
| chr28                           | 11924200 | 2 | 290 | G:0.827586           | GA:0.172414    |
| chr28                           | 11924543 | 3 | 300 | T:0.636667           | TA:0.166667    |
| TAA:0.196667                    |          |   |     |                      |                |
| chr28                           | 11924749 | 2 | 298 | C:0.95302            | T:0.0469799    |
| chr28                           | 11924955 | 2 | 304 | G:0.960526           | C:0.0394737    |
| chr28                           | 11925141 | 2 | 306 | C:0.820261           | T:0.179739     |
| chr28                           | 11925145 | 2 | 306 | C:0.820261           | T:0.179739     |
| chr28                           | 11925403 | 2 | 294 | T:0.823129           | G:0.176871     |
| chr28                           | 11925465 | 3 | 298 | TAC:0.33557          | T:0.416107     |
| TACAC:0.248322                  |          |   |     |                      |                |
| chr28                           | 11925618 | 2 | 298 | GTA:0.825503         | G:0.174497     |
| chr28                           | 11926540 | 2 | 308 | C:0.964286           | T:0.0357143    |
| chr28                           | 11926790 | 2 | 292 | ATAT:0.808219        | A:0.191781     |
| chr28                           | 11927064 | 2 | 300 | A:0.94 G:0.06        |                |
| chr28                           | 11927120 | 2 | 302 | C:0.976821           | A:0.0231788    |
| chr28                           | 11927127 | 2 | 302 | G:0.976821           | A:0.0231788    |
| chr28                           | 11927537 | 2 | 302 | A:0.89404            | T:0.10596      |
| chr28                           | 11927971 | 2 | 304 | A:0.766447           | G:0.233553     |
| chr28                           | 11928193 | 3 | 304 | GA:0.707237          | G:0.0953947    |
| GAAAA:0.197368                  |          |   |     |                      |                |
| chr28                           | 11928202 | 2 | 304 | A:0.572368           | G:0.427632     |
| chr28                           | 11928669 | 2 | 306 | C:0.993464           | T:0.00653595   |
| chr28                           | 11929228 | 2 | 306 | A:0.767974           | G:0.232026     |
| chr28                           | 11929501 | 2 | 288 | A:0.295139           | T:0.704861     |
| chr28                           | 11929565 | 2 | 206 | T:0.291262           | TG:0.708738    |
| chr28                           | 11929912 | 2 | 294 | A:0.445578           | T:0.554422     |
| chr28                           | 11930389 | 2 | 296 | G:0.976351           | C:0.0236486    |
| chr28                           | 11930492 | 2 | 290 | A:0.72069            | G:0.27931      |
| chr28                           | 11930545 | 2 | 286 | G:0.143357           | GAATA:0.856643 |
| chr28                           | 11930585 | 2 | 294 | CT:0.928571          | C:0.0714286    |
| chr28                           | 11930846 | 2 | 310 | T:0.990323           | C:0.00967742   |
| chr28                           | 11931229 | 2 | 302 | C:0.983444           | T:0.0165563    |

|                        |          |   |                          |                                  |                  |
|------------------------|----------|---|--------------------------|----------------------------------|------------------|
| chr28                  | 11931810 | 2 | 304                      | A:0.947368                       | G:0.0526316      |
| chr28                  | 11931814 | 2 | 308                      | C:0.792208                       | CTAAA:0.207792   |
| chr28                  | 11932298 | 2 | 310                      | G:0.303226                       | T:0.696774       |
| chr28                  | 11932598 | 2 | 306                      | GTATATATATATATATATATATATATATATA: |                  |
| 0.535948 G:0.464052    |          |   |                          |                                  |                  |
| chr28                  | 11932897 | 2 | 228                      | G:0.403509                       | A:0.596491       |
| chr28                  | 11933330 | 2 | 310                      | A:0.996774                       | AAAAT:0.00322581 |
| chr28                  | 11933512 | 2 | 306                      | G:0.271242                       | GT:0.728758      |
| chr28                  | 11933888 | 2 | 310                      | T:0.13871                        | C:0.86129        |
| chr28                  | 11934128 | 2 | 294                      | C:0.765306                       | T:0.234694       |
| chr28                  | 11934241 | 2 | 306                      | T:0.70915                        | TC:0.29085       |
| chr28                  | 11934242 | 5 | 316                      | T:0.449367                       | C:0.275316       |
| TCTCTCTC:0.129747      |          |   | TCTCTCTCTCTCTC:0.0537975 |                                  |                  |
| 0.0917722              |          |   |                          |                                  |                  |
| chr28                  | 11934544 | 2 | 304                      | CAG:0.743421                     | C:0.256579       |
| chr28                  | 11934741 | 2 | 304                      | G:0.75                           | A:0.25           |
| chr28                  | 11935044 | 2 | 294                      | T:0.404762                       | A:0.595238       |
| chr28                  | 11935286 | 2 | 312                      | C:0.820513                       | CA:0.179487      |
| chr28                  | 11935773 | 2 | 296                      | CCTCTCTCT:0.317568               | C:               |
| 0.682432               |          |   |                          |                                  |                  |
| chr28                  | 11936014 | 2 | 290                      | T:0.941379                       | TA:0.0586207     |
| chr28                  | 11936934 | 2 | 294                      | T:0.585034                       | TA:0.414966      |
| chr28                  | 11937093 | 2 | 290                      | G:0.837931                       | T:0.162069       |
| chr28                  | 11937180 | 2 | 300                      | G:0.793333                       | A:0.206667       |
| chr28                  | 11937363 | 2 | 312                      | T:0.977564                       | A:0.0224359      |
| chr28                  | 11937914 | 2 | 290                      | T:0.958621                       | TAA:0.0413793    |
| chr28                  | 11937922 | 2 | 306                      | A:0.96732                        | AT:0.0326797     |
| chr28                  | 11937923 | 2 | 306                      | A:0.954248                       | ATAT:0.0457516   |
| chr28                  | 11937925 | 3 | 306                      | A:0.797386                       | T:0.0555556      |
| ATAT:0.147059          |          |   |                          |                                  |                  |
| chr28                  | 11937926 | 2 | 306                      | A:0.882353                       | AT:0.117647      |
| chr28                  | 11937927 | 4 | 306                      | A:0.261438                       | T:0.418301       |
| AT:0.24183             |          |   | ATAT:0.0784314           |                                  |                  |
| chr28                  | 11937946 | 2 | 274                      | A:0.346715                       | G:0.653285       |
| chr28                  | 11938525 | 3 | 304                      | TA:0.5                           | T:0.398026       |
| TTAAAAAAA:0.101974     |          |   |                          |                                  |                  |
| chr28                  | 11938606 | 2 | 282                      | G:0.950355                       | A:0.0496454      |
| chr28                  | 11938703 | 2 | 274                      | ATTTT:0.791971                   | A:0.208029       |
| chr28                  | 11938709 | 2 | 274                      | T:0.791971                       | TAAAAAA:0.208029 |
| chr28                  | 11938710 | 2 | 276                      | A:0.963768                       | T:0.0362319      |
| chr28                  | 11938757 | 5 | 310                      | AAAATAAATAAATAAATAAAT:0.26129    |                  |
| A:0.196774             |          |   | AAAAT:0.0419355          |                                  |                  |
| AAAATAAATAAAT:0.119355 |          |   |                          |                                  |                  |
| chr28                  | 11938798 | 2 | 312                      | AAAT:0.980769                    | A:0.0192308      |
| chr28                  | 11938805 | 2 | 312                      | TAAATAAATAAATA:0.980769          |                  |
| 0.0192308              |          |   |                          |                                  |                  |
| chr28                  | 11940234 | 2 | 306                      | C:0.104575                       | G:0.895425       |
| chr28                  | 11940662 | 2 | 308                      | T:0.948052                       | A:0.0519481      |
| chr28                  | 11941067 | 2 | 258                      | G:0.953488                       | A:0.0465116      |
| chr28                  | 11941333 | 3 | 278                      | GA:0.55036                       | G:0.21223        |
| GAA:0.23741            |          |   |                          |                                  |                  |
| chr28                  | 11941949 | 3 | 302                      | CT:0.546358                      | C:0.370861       |
| CTT:0.0827815          |          |   |                          |                                  |                  |
| chr28                  | 11942027 | 2 | 310                      | T:0.825806                       | A:0.174194       |

|                     |          |   |     |                   |                |
|---------------------|----------|---|-----|-------------------|----------------|
| chr28               | 11942083 | 2 | 308 | C:0.808442        | CT:0.191558    |
| chr28               | 11942208 | 2 | 302 | A:0.966887        | G:0.0331126    |
| chr28               | 11942504 | 2 | 312 | T:0.990385        | C:0.00961538   |
| chr28               | 11943099 | 2 | 302 | G:0.933775        | A:0.0662252    |
| chr28               | 11943182 | 2 | 302 | T:0.596026        | C:0.403974     |
| chr28               | 11943470 | 3 | 292 | C:0.510274        | CT:0.386986    |
| CTT:0.10274         |          |   |     |                   |                |
| chr28               | 11943775 | 2 | 312 | T:0.964744        | C:0.0352564    |
| chr28               | 11943783 | 2 | 314 | G:0.993631        | T:0.00636943   |
| chr28               | 11944716 | 3 | 318 | C:0.789308        | CTATT:0.185535 |
| CTATTTATT:0.0251572 |          |   |     |                   |                |
| chr28               | 11944733 | 2 | 314 | TA:0.538217       | T:0.461783     |
| chr28               | 11944735 | 2 | 314 | TTTATTTA:0.538217 | T:             |
| 0.461783            |          |   |     |                   |                |
| chr28               | 11945088 | 2 | 300 | A:0.956667        | T:0.0433333    |
| chr28               | 11945937 | 2 | 302 | G:0.993377        | A:0.00662252   |
| chr28               | 11946538 | 2 | 314 | G:0.509554        | A:0.490446     |
| chr28               | 11946751 | 2 | 300 | T:0.946667        | TG:0.0533333   |
| chr28               | 11946778 | 2 | 304 | A:0.805921        | G:0.194079     |
| chr28               | 11946871 | 2 | 302 | C:0.950331        | T:0.0496689    |
| chr28               | 11947351 | 2 | 300 | C:0.873333        | T:0.126667     |
| chr28               | 11947671 | 2 | 314 | C:0.821656        | T:0.178344     |
| chr28               | 11947690 | 2 | 314 | T:0.821656        | TC:0.178344    |
| chr28               | 11948105 | 2 | 292 | T:0.825342        | G:0.174658     |
| chr28               | 11948372 | 2 | 292 | G:0.80137         | C:0.19863      |
| chr28               | 11948644 | 2 | 308 | T:0.964286        | C:0.0357143    |
| chr28               | 11949722 | 2 | 302 | C:0.761589        | T:0.238411     |
| chr28               | 11949766 | 2 | 304 | G:0.388158        | A:0.611842     |
| chr28               | 11952122 | 2 | 304 | TA:0.990132       | T:0.00986842   |
| chr28               | 11952170 | 2 | 308 | A:0.996753        | T:0.00324675   |
| chr28               | 11953056 | 2 | 310 | A:0.841935        | G:0.158065     |
| chr28               | 11953367 | 2 | 300 | A:0.966667        | G:0.0333333    |
| chr28               | 11953661 | 2 | 296 | T:0               | A:1            |
| chr28               | 11953692 | 2 | 288 | AGATAGAT:0.986111 | A:             |
| 0.0138889           |          |   |     |                   |                |
| chr28               | 11953710 | 2 | 304 | AGAT:0.894737     | A:0.105263     |
| chr28               | 11953926 | 2 | 264 | TGGGGG:0          | T:1            |
| chr28               | 11953931 | 2 | 264 | G:0               | GTCATT:1       |
| chr28               | 11953980 | 2 | 282 | C:0               | G:1            |
| chr28               | 11954267 | 2 | 300 | GT:0.473333       | G:0.526667     |
| chr28               | 11954676 | 3 | 316 | C:0.509494        | CACAT:0.240506 |
| CACACAT:0.25        |          |   |     |                   |                |
| chr28               | 11956227 | 2 | 304 | T:0.865132        | TCC:0.134868   |
| chr28               | 11957195 | 2 | 298 | A:0.97651         | G:0.0234899    |
| chr28               | 11957224 | 2 | 292 | G:0.684932        | A:0.315068     |
| chr28               | 11957389 | 2 | 282 | GTC:0.801418      | G:0.198582     |
| chr28               | 11957443 | 2 | 296 | TA:0.949324       | T:0.0506757    |
| chr28               | 11957444 | 2 | 298 | A:0.949664        | T:0.0503356    |
| chr28               | 11958561 | 2 | 310 | C:0.96129         | T:0.0387097    |
| chr28               | 11958875 | 2 | 306 | A:0.281046        | G:0.718954     |
| chr28               | 11959680 | 2 | 308 | T:0.0811688       | C:0.918831     |
| chr28               | 11959744 | 2 | 298 | C:0.828859        | T:0.171141     |
| chr28               | 11960152 | 2 | 314 | C:0.980892        | A:0.0191083    |
| chr28               | 11960153 | 2 | 314 | A:0.980892        | G:0.0191083    |



|                             |            |                        |                    |              |
|-----------------------------|------------|------------------------|--------------------|--------------|
| chr28                       | 11960190 2 | 306                    | G:0.539216         | C:0.460784   |
| chr28                       | 11960659 2 | 306                    | T:0.95098          | C:0.0490196  |
| chr28                       | 11960831 2 | 308                    | C:0.324675         | T:0.675325   |
| chr28                       | 11961189 4 | 316                    | TAAAA:0.196203     | T:0.376582   |
| TA:0.243671                 |            | TAA:0.183544           |                    |              |
| chr28                       | 11961209 2 | 308                    | C:0.844156         | T:0.155844   |
| chr28                       | 11961560 2 | 304                    | A:0.970395         | T:0.0296053  |
| chr28                       | 11961614 2 | 302                    | T:0.963576         | C:0.0364238  |
| chr28                       | 11962378 2 | 306                    | A:0.954248         | G:0.0457516  |
| chr28                       | 11962816 2 | 294                    | G:0.540816         | T:0.459184   |
| chr28                       | 11963058 2 | 308                    | A:0.996753         | T:0.00324675 |
| chr28                       | 11963604 2 | 304                    | G:0.657895         | T:0.342105   |
| chr28                       | 11964129 2 | 316                    | CCCAACAGT:0.987342 | C:           |
| 0.0126582                   |            |                        |                    |              |
| chr28                       | 11964386 3 | 304                    | G:0.621711         | GA:0.319079  |
| GAA:0.0592105               |            |                        |                    |              |
| chr28                       | 11964876 2 | 306                    | A:0.797386         | G:0.202614   |
| chr28                       | 11965104 2 | 308                    | C:0.694805         | CA:0.305195  |
| chr28                       | 11966279 2 | 302                    | C:0.811258         | T:0.188742   |
| chr28                       | 11966965 2 | 306                    | T:0.947712         | C:0.0522876  |
| chr28                       | 11967211 2 | 310                    | G:0.958065         | A:0.0419355  |
| chr28                       | 11967480 2 | 308                    | C:0.470779         | G:0.529221   |
| chr28                       | 11967512 2 | 316                    | T:0.674051         | C:0.325949   |
| chr28                       | 11967802 2 | 296                    | T:0.942568         | TA:0.0574324 |
| chr28                       | 11967808 2 | 296                    | A:0.131757         | AT:0.868243  |
| chr28                       | 11967885 2 | 300                    | C:0.793333         | T:0.206667   |
| chr28                       | 11968174 2 | 294                    | G:0.986395         | A:0.0136054  |
| chr28                       | 11968322 2 | 302                    | C:0.0860927        | T:0.913907   |
| chr28                       | 11968856 4 | 310                    | TAAA:0.403226      | T:0.0741935  |
| TA:0.383871                 |            | TAA:0.13871            |                    |              |
| chr28                       | 11969669 2 | 294                    | T:0.734694         | TTC:0.265306 |
| chr28                       | 11970830 3 | 294                    | G:0.193878         | T:0.697279   |
| GT:0.108844                 |            |                        |                    |              |
| chr28                       | 11971952 2 | 308                    | T:0.12987          | A:0.87013    |
| chr28                       | 11972207 2 | 310                    | CT:0.709677        | C:0.290323   |
| chr28                       | 11972301 2 | 296                    | G:0.797297         | A:0.202703   |
| chr28                       | 11973488 2 | 298                    | T:0.137584         | A:0.862416   |
| chr28                       | 11973621 2 | 312                    | C:0.961538         | T:0.0384615  |
| chr28                       | 11974765 6 | 314                    | TTTTA:0.264331     | T:0.0700637  |
| TTTTATTTA:0.191083          |            | TTTTATTTATTTA:0.280255 |                    |              |
| TTTTATTTATTTATTTA:0.0796178 |            |                        |                    |              |
| chr28                       | 11974832 2 | 288                    | C:0.701389         | T:0.298611   |
| chr28                       | 11975354 3 | 316                    | CCTCTCT:0.64557    | C:0.287975   |
| CCTCTCTCT:0.0664557         |            |                        |                    |              |
| chr28                       | 11975970 2 | 308                    | TAA:0.652597       | T:0.347403   |
| chr28                       | 11976288 2 | 300                    | C:0.65             | T:0.35       |
| chr28                       | 11976388 2 | 266                    | C:0.842105         | G:0.157895   |
| chr28                       | 11976416 2 | 282                    | GA:0.833333        | G:0.166667   |
| chr28                       | 11977267 2 | 296                    | A:0.976351         | T:0.0236486  |
| chr28                       | 11977593 2 | 292                    | TG:0.94863         | T:0.0513699  |
| chr28                       | 11977594 2 | 292                    | G:0.520548         | T:0.479452   |
| chr28                       | 11977941 2 | 280                    | G:0.657143         | GCT:0.342857 |
| chr28                       | 11978498 2 | 302                    | C:0.966887         | T:0.0331126  |
| chr28                       | 11978698 2 | 306                    | C:0.95098          | G:0.0490196  |

|       |                         |           |                          |              |           |                   |    |
|-------|-------------------------|-----------|--------------------------|--------------|-----------|-------------------|----|
| chr28 | 11979036                | 2         | 302                      | C:0          | T:1       |                   |    |
| chr28 | 11979037                | 2         | 302                      | T:0          | A:1       |                   |    |
| chr28 | 11979045                | 2         | 302                      | G:0          | A:1       |                   |    |
| chr28 | 11979095                | 3         | 318                      | C:0          | A:0.31761 |                   | G: |
|       | 0.68239                 |           |                          |              |           |                   |    |
| chr28 | 11979096                | 2         | 318                      | G:0          | A:1       |                   |    |
| chr28 | 11979117                | 2         | 318                      | C:0          | A:1       |                   |    |
| chr28 | 11979120                | 2         | 318                      | TG:0         | T:1       |                   |    |
| chr28 | 11979122                | 2         | 318                      | T:0          | A:1       |                   |    |
| chr28 | 11979124                | 2         | 318                      | T:0          | TA:1      |                   |    |
| chr28 | 11979128                | 2         | 318                      | G:0          | GA:1      |                   |    |
| chr28 | 11979294                | 2         | 278                      | G:0.658273   |           | A:0.341727        |    |
| chr28 | 11979403                | 2         | 308                      | A:0.987013   |           | T:0.012987        |    |
| chr28 | 11979410                | 2         | 306                      | T:0.418301   |           | TA:0.581699       |    |
| chr28 | 11979466                | 2         | 308                      | A:0.948052   |           | G:0.0519481       |    |
| chr28 | 11979565                | 2         | 292                      | T:0.969178   |           | G:0.0308219       |    |
| chr28 | 11979783                | 2         | 304                      | GA:0.983553  |           | G:0.0164474       |    |
| chr28 | 11979986                | 2         | 308                      | T:0.896104   |           | TA:0.103896       |    |
| chr28 | 11980824                | 2         | 308                      | T:0.853896   |           | A:0.146104        |    |
| chr28 | 11981157                | 2         | 296                      | A:0.831081   |           | G:0.168919        |    |
| chr28 | 11981193                | 2         | 302                      | T:0.354305   |           | C:0.645695        |    |
| chr28 | 11981412                | 2         | 272                      | C:0.849265   |           | A:0.150735        |    |
| chr28 | 11981521                | 2         | 248                      | AT:0.633065  |           | A:0.366935        |    |
| chr28 | 11981630                | 2         | 168                      | G:0.880952   |           | A:0.119048        |    |
| chr28 | 11981868                | 2         | 276                      | T:0.963768   |           | C:0.0362319       |    |
| chr28 | 11981921                | 2         | 298                      | G:0.973154   |           | A:0.0268456       |    |
| chr28 | 11982155                | 2         | 306                      | C:0.98366    |           | T:0.0163399       |    |
| chr28 | 11982863                | 2         | 214                      | TA:0.542056  |           | T:0.457944        |    |
| chr28 | 11982967                | 2         | 298                      | T:0.385906   |           | G:0.614094        |    |
| chr28 | 11983015                | 2         | 278                      | C:0.964029   |           | T:0.0359712       |    |
| chr28 | 11984094                | 4         | 300                      | TA:0.456667  |           | T:0.0633333       |    |
|       | TAA:0.22                | TAAA:0.26 |                          |              |           |                   |    |
| chr28 | 11984180                | 2         | 296                      | A:0.85473    |           | T:0.14527         |    |
| chr28 | 11984232                | 2         | 268                      | TA:0.764925  |           | T:0.235075        |    |
| chr28 | 11984843                | 2         | 306                      | T:0.683007   |           | C:0.316993        |    |
| chr28 | 11985322                | 4         | 316                      | T:0.626582   |           | TACACAC:0.167722  |    |
|       | TACACACACACAC:0.0759494 |           | TACACACACACACAC:0.129747 |              |           |                   |    |
| chr28 | 11985341                | 2         | 310                      | A:0.967742   |           | ACACACG:0.0322581 |    |
| chr28 | 11986832                | 2         | 304                      | C:0.493421   |           | T:0.506579        |    |
| chr28 | 11986972                | 2         | 314                      | T:0.468153   |           | G:0.531847        |    |
| chr28 | 11987107                | 2         | 304                      | C:0.677632   |           | T:0.322368        |    |
| chr28 | 11987193                | 2         | 310                      | C:0.980645   |           | CT:0.0193548      |    |
| chr28 | 11987203                | 3         | 310                      | TAA:0.819355 |           | AAA:0.145161      |    |
|       | T:0.0354839             |           |                          |              |           |                   |    |
| chr28 | 11987204                | 2         | 306                      | A:0.27451    |           | T:0.72549         |    |
| chr28 | 11987205                | 3         | 310                      | A:0.619355   |           | T:0.345161        |    |
|       | ATTT:0.0354839          |           |                          |              |           |                   |    |
| chr28 | 11987394                | 2         | 278                      | G:0.485612   |           | A:0.514388        |    |
| chr28 | 11987565                | 2         | 304                      | C:0.661184   |           | G:0.338816        |    |
| chr28 | 11987567                | 2         | 306                      | G:0.526144   |           | C:0.473856        |    |
| chr28 | 11987569                | 2         | 306                      | T:0.0816993  |           | G:0.918301        |    |
| chr28 | 11987614                | 3         | 306                      | A:0.117647   |           | AC:0.803922       |    |
|       | AAC:0.0784314           |           |                          |              |           |                   |    |
| chr28 | 11987738                | 2         | 296                      | G:0.516892   |           | A:0.483108        |    |

|       |          |   |     |                    |              |
|-------|----------|---|-----|--------------------|--------------|
| chr28 | 11987792 | 2 | 292 | C:0.94863          | T:0.0513699  |
| chr28 | 11987831 | 2 | 292 | CA:0.534247        | C:0.465753   |
| chr28 | 11987838 | 2 | 296 | AG:0.976351        | A:0.0236486  |
| chr28 | 11987939 | 2 | 310 | G:0.5 A:0.5        |              |
| chr28 | 11988358 | 2 | 306 | T:0.519608         | A:0.480392   |
| chr28 | 11988666 | 2 | 304 | C:0.5 T:0.5        |              |
| chr28 | 11989396 | 2 | 304 | C:0.121711         | T:0.878289   |
| chr28 | 11989706 | 2 | 312 | T:0.778846         | C:0.221154   |
| chr28 | 11989779 | 2 | 310 | C:0.235484         | T:0.764516   |
| chr28 | 11989837 | 2 | 306 | G:0.839869         | A:0.160131   |
| chr28 | 11989917 | 2 | 308 | A:0.243506         | G:0.756494   |
| chr28 | 11990163 | 2 | 304 | G:0.822368         | A:0.177632   |
| chr28 | 11990325 | 2 | 310 | T:0.935484         | G:0.0645161  |
| chr28 | 11990723 | 2 | 306 | TTGAC:0.964052     | T:0.0359477  |
| chr28 | 11990918 | 2 | 312 | TTGTC:0.948718     | T:0.0512821  |
| chr28 | 11990954 | 2 | 308 | A:0.954545         | T:0.0454545  |
| chr28 | 11991092 | 2 | 298 | C:0.755034         | G:0.244966   |
| chr28 | 11991267 | 2 | 306 | C:0.980392         | T:0.0196078  |
| chr28 | 11991290 | 2 | 304 | T:0.973684         | C:0.0263158  |
| chr28 | 11991416 | 2 | 302 | G:0.241722         | A:0.758278   |
| chr28 | 11991771 | 2 | 316 | C:0.227848         | T:0.772152   |
| chr28 | 11992173 | 2 | 298 | A:0.0604027        | G:0.939597   |
| chr28 | 11992225 | 2 | 292 | TA:0.84589         | T:0.15411    |
| chr28 | 11992457 | 2 | 310 | T:0.783871         | C:0.216129   |
| chr28 | 11992471 | 2 | 312 | CT:0.955128        | C:0.0448718  |
| chr28 | 11992489 | 2 | 300 | C:0.96 A:0.04      |              |
| chr28 | 11992545 | 2 | 308 | G:0.993506         | A:0.00649351 |
| chr28 | 11992674 | 2 | 298 | GA:0.187919        | G:0.812081   |
| chr28 | 11993152 | 2 | 308 | A:0.0974026        | G:0.902597   |
| chr28 | 11993700 | 2 | 306 | A:0.0555556        | G:0.944444   |
| chr28 | 11993701 | 2 | 308 | A:0.951299         | G:0.0487013  |
| chr28 | 11994118 | 2 | 316 | A:0.981013         | T:0.0189873  |
| chr28 | 11994154 | 2 | 316 | G:0.724684         | A:0.275316   |
| chr28 | 11995746 | 2 | 306 | T:0.941176         | C:0.0588235  |
| chr28 | 11995875 | 2 | 284 | T:0.947183         | A:0.0528169  |
| chr28 | 11996015 | 2 | 308 | C:0.938312         | T:0.0616883  |
| chr28 | 11996842 | 2 | 302 | T:0.182119         | C:0.817881   |
| chr28 | 11996881 | 2 | 308 | C:0.977273         | T:0.0227273  |
| chr28 | 11996935 | 2 | 304 | G:0.0559211        | T:0.944079   |
| chr28 | 11997298 | 2 | 288 | G:0.9375 GA:0.0625 |              |
| chr28 | 11997605 | 2 | 304 | C:0.976974         | T:0.0230263  |
| chr28 | 11997790 | 2 | 302 | G:0.930464         | GA:0.0695364 |
| chr28 | 11997824 | 2 | 294 | C:0.996599         | G:0.00340136 |
| chr28 | 11998542 | 2 | 300 | C:0.0566667        | CT:0.943333  |
| chr28 | 11998797 | 2 | 298 | G:0.0503356        | C:0.949664   |
| chr28 | 11998803 | 2 | 298 | G:0.902685         | A:0.0973154  |
| chr28 | 11999041 | 2 | 308 | G:0.951299         | A:0.0487013  |
| chr28 | 11999424 | 2 | 306 | G:0.977124         | T:0.0228758  |
