# Supplementary material for: Genome-Wide Analyses Suggest Mechanisms Involving Early B-Cell Development in Canine IgA Deficiency
Source: PubMed Central journal article supplement (PMC4520476; doi:10.1371/journal.pone.0133844), 2015-07-30
Supplement: pone.0133844.s027.pdf [file pone.0133844.s027.pdf]

**Table S17: Coordinates in canfam2.0, hg18 and canfam3 for all IgA associated regions for GRAIL and INRICH analyses**

| region_id* | canfam2.0 |          |          | hg18 |           |           | canfam3 |          |          |
|------------|-----------|----------|----------|------|-----------|-----------|---------|----------|----------|
|            | chr       | start    | stop     | chr  | start     | stop      | chr     | start    | stop     |
| gsp1       | 28        | 13444314 | 16073744 | 10   | 98864730  | 102081284 | 28      | 10446800 | 13077479 |
| gsp2       | 28        | 21775320 | 21875320 | 10   | 108502194 | 108635312 | 28      | 18773291 | 18873291 |
| gsp3       | 28        | 12856831 | 12991728 | 10   | 98214849  | 98361838  | 28      | 9859408  | 9994305  |
| gsp4       | 28        | 10681718 | 10801858 | 10   | 95146745  | 95318062  | 28      | 7683212  | 7803352  |
| gsp5       | 28        | 8931432  | 9031432  | 10   | 93083749  | 93209420  | 28      | 5933856  | 6033856  |
| gsp6       | 4         | 34328856 | 34428856 | 10   | 84273940  | 84379019  | 4       | 31118913 | 31218913 |
| gsp7       | 7         | 18466863 | 18566863 | 1    | 180325372 | 180442510 | 7       | 15505664 | 15605664 |
| gsp8       | 7         | 19106802 | 19206802 | 1    | 180987985 | 181085258 | 7       | 16146250 | 16246197 |
| gsp9       | 7         | 20699277 | 20799277 | 1    | 182736880 | 182843787 | 7       | 17736665 | 17836665 |
| gsp10      | 7         | 22587896 | 22687896 | 1    | 184854786 | 184988218 | 7       | 19623829 | 19723829 |
| gsp11      | 7         | 25683140 | 25783140 | 1    | 175030853 | 175136140 | 7       | 22714328 | 22814328 |
| gsp12      | 8         | 19014736 | 19114736 | 14   | 37059446  | 37159929  | 8       | 16008011 | 16108075 |
| gsp13      | 22        | 23796999 | 23896999 | 13   | 65129544  | 65275791  | 22      | 20848859 | 20949206 |
| gsp14      | 24        | 44233381 | 44333381 | 20   | 53925151  | 54050713  | 24      | 41251998 | 41351998 |
| gsp15      | 35        | 4931728  | 5031728  | 6    | 1438693   | 1531669   | 35      | 1931709  | 2031709  |
| gsp16      | 35        | 11258142 | 11358142 | 6    | 8286608   | 8399749   | 35      | 8250009  | 8350115  |
| ggsd1      | 5         | 9500347  | 11174145 | 11   | 125720557 | 127533615 | 5       | 6498684  | 8172621  |
| ggsd6      | 8         | 66251422 | 66867233 | 14   | 93721279  | 94450755  | 8       | 63211755 | 63827575 |
| ggsd7      | 10        | 72227420 | 72329612 | 2    | 70765977  | 70893781  | 10      | 69072184 | 69174348 |
| ggsd8      | 14        | 45130092 | 45246967 | 7    | 29151909  | 29280089  | 14      | 42174407 | 42291282 |
| ggsd9      | 16        | 48920635 | 49337432 | 4    | 185504021 | 185740373 | 16      | 45960356 | 46377153 |
| ggsd11     | 23        | 51492483 | 51592483 | 3    | 155505284 | 155640373 | 23      | 48439474 | 48539474 |
| ggsd12     | 27        | 40276517 | 40483033 | 12   | 7926708   | 8122868   | 27      | 37248047 | 37454652 |
| ggsd13     | 5         | 32196812 | 32296812 | 11   | 101759107 | 101906384 | 5       | 29188112 | 29288253 |
| ggr1       | 6         | 21024771 | 21124771 | 16   | 29893801  | 30037277  | 6       | 18011946 | 18112312 |
| ggr2       | 21        | 49116056 | 49216056 | 11   | 24704154  | 24837668  | 21      | 45923013 | 46023013 |
| ggr3       | 26        | 10131206 | 10865491 | 12   | 120221446 | 121289322 | 26      | 7114611  | 7846707  |
| ggr4       | 28        | 40226068 | 40360530 | 10   | 130172844 | 130315432 | 28      | 37228122 | 37362478 |
| ggr5       | 29        | 13811471 | 14805990 | 8    | 61420069  | 62567586  | 29      | 10808328 | 11803162 |
| ggr6       | 34        | 24416647 | 25600000 | 3    | 190391367 | 191812849 | 34      | 21406221 | 22589723 |
| ggr7       | 34        | 44349864 | 44757483 | 3    | 179227787 | 179685817 | 34      | 41343801 | 41751420 |
| ggr8       | 34        | 13267919 | 13690838 | 5    | 2245032   | 2769961   | 34      | 10261397 | 10685205 |
| glr1       | 23        | 27717862 | 27823499 | 3    | 18261917  | 18389612  | 23      | 24665511 | 24771148 |
| glr2       | 23        | 45077859 | 45194536 | 3    | 148089336 | 148202105 | 23      | 42026107 | 42142835 |
| glr3       | 30        | 20807660 | 20907660 | 15   | 50188546  | 50300642  | 30      | 17817239 | 17917239 |

\* g=gwas region followed by breed.
