# Supplementary material for: Genome-Wide Analyses Suggest Mechanisms Involving Early B-Cell Development in Canine IgA Deficiency
Source: PLoS One. 2015 Jul 30;10(7):e0133844. doi: 10.1371/journal.pone.0133844 (PMC4520476; doi:10.1371/journal.pone.0133844)
Supplement: S3 Table — (XLSX) [file pone.0133844.s013.xlsx]

## Sheet: TableS7
Table S3: Frequencies of the top SNPs in the IgA associated regions
							GERMAN SHEPHERD								GOLDEN								SHARPEI								LABRADOR								Control breeds
SNP	Chr	postion	P	Alleles	Risk allele	Closest gene to SNP	A1	A2	No	Q,2	Risk allele freq	P.11	P.12	P.22	A1	A2	No	Q,2	Risk allele freq	P.11	P.12	P.22	A1	A2	No	Q,2	Risk allele freq	P.11	P.12	P.22	A1	A2	No	Q,2	Risk allele freq	P.11	P.12	P.22	Risk allele freq
German shepherd
BICF2P417629	5	7009995	3.0E-05	G/A	A	KIRREL3 (upstream of)	G	A	515	0.135922	0.135922	382	126	7	A	G	187	0	1	187	0	0	G	A	95	0.452632	0.452632	28	48	19	A	G	302	0.190397	0.809603	199	91	12	0.79
BICF2P853011	5	29238199	4.6E-04	T/C	C	TMEM123 (intron)	T	C	513	0.0555556	0.0555556	458	53	2	C	T	187	0.144385	0.855615	134	52	1	T	C	95	0.489474	0.489474	20	57	18	C	T	302	0.294702	0.705298	153	120	29	0.511461
TIGRP2P118956	8	63777575	8.9E-05	A/G	G	GSC (upstream of)	A	G	512	0.401367	0.401367	179	255	78	G	A	186	0.846774	0.153226	3	51	132	G	A	95	0.484211	0.515789	27	44	24	G	A	302	0.253311	0.746689	176	99	27	0.783668
BICF2S23435776	10	69122184	3.9E-04	A/C	C	ADD2 (upstream of)	A	C	510	0.490196	0.490196	135	250	125	A	C	186	0.241935	0.241935	106	70	10	C	A	94	0.452128	0.547872	26	51	17	A	C	299	0.100334	0.100334	243	52	4	0.709169
BICF2G630530840	14	42224407	3.9E-04	C/T	C	CHN2 (intronic)	A	C	514	0.183852	0.183852	347	145	22	C	A	187	0.0641711	0.935829	165	20	2	A	C	95	0.384211	0.384211	36	45	14	C	A	302	0.294702	0.705298	150	126	26	0.504286
BICF2P168717	16	46117662	3.0E-04	A/C	A	IRF2 (intronic)	A	C	511	0.495108	0.504892	132	252	127	A	C	186	0.287634	0.712366	91	83	12	A	C	95	0.184211	0.815789	63	29	3	A	C	302	0.163907	0.836093	210	85	7	0.707143
BICF2G630365408	23	48489474	4.1E-05	C/A	C	GPR149 (intronic)	C	A	492	0.0711382	0.928862	423	68	1	C	A	184	0.217391	0.782609	117	54	13	C	A	92	0.396739	0.603261	34	43	15	C	A	295	0.0254237	0.974576	281	13	1	0.652738
BICF2P247941	27	37404652	4.6E-04	T/C	T	FOXJ2 (upstream of)	T	C	516	0.554264	0.445736	97	266	153	T	C	187	0.342246	0.657754	77	92	18	T	C	95	0.0473684	0.952632	86	9	0	T	C	302	0.10596	0.89404	244	52	6	0.654286
Golden retriever
BICF2P856602	6	18062312	1.6E-04	C/T	T	PPP2CB (intronic)	T	C	514	0.337549	0.662451	235	211	68	C	T	187	0.163102	0.163102	131	51	5	C	T	95	0.0526316	0.0526316	85	10	0	C	T	302	0.38245	0.38245	105	163	34	0.494286
BICF2P442233	21	45973013	4.4E-04	T/C	T	LUZP2 (intronic)	T	C	506	0.322134	0.677866	234	218	54	T	C	186	0.556452	0.443548	39	87	60	T	C	87	0.396552	0.603448	35	35	17	T	C	282	0.124113	0.875887	213	68	1	0.676724
BICF2P261279	26	7164610	3.9E-05	G/A	A	Lrrc43 (intronic)	A	G	514	0.254864	0.745136	288	190	36	G	A	185	0.316216	0.316216	88	77	20	A	G	95	0.415789	0.584211	32	47	16	G	A	300	0.205	0.205	191	95	14	0.581429
BICF2G630261705	28	37236337	2.5E-04	T/C	T	MKI67 (upstream of)	C	T	512	0.250977	0.250977	287	193	32	T	C	187	0.68984	0.31016	22	72	93	T	C	95	0.347368	0.652632	39	46	10	T	C	302	0.273179	0.726821	158	123	21	0.595714
BICF2S232271	29	11752985	3.2E-04	A/G	G	CLVS1 (intronic)	A	G	514	0.442607	0.442607	159	255	100	A	G	187	0.596257	0.596257	27	97	63	G	A	95	0.142105	0.857895	70	23	2	A	G	302	0.251656	0.251656	170	112	20	0.585714
BICF2P877790	34	10311397	4.4E-04	C/T	T	IRX2 (downstream of)	C	T	515	0.000970874	0.000970874	514	1	0	C	T	187	0.0695187	0.0695187	161	26	0	C	T	96	0	0	96	0	0	C	T	302	0.0860927	0.0860927	253	46	3	0.878571
BICF2P963046	34	21820555	4.7E-05	G/T	G	TP63 (upstream of)	G	T	515	0.208738	0.791262	321	173	21	G	T	187	0.109626	0.890374	150	33	4	G	T	96	0.046875	0.953125	87	9	0	G	T	302	0.0430464	0.956954	276	26	0	0.798571
BICF2P1301719	34	41393801	4.4E-04	C/T	C	LRMP	T	C	513	0.192982	0.192982	342	144	27	C	T	187	0.532086	0.467914	40	95	52	C	T	95	0.242105	0.757895	57	30	8	C	T	302	0.172185	0.827815	207	86	9	0.542857
Labrador retriever
BICF2G630378390	23	24721148	3.8E-04	G/A	G	SATB1 (downstream of)	G	A	516	0.0852713	0.914729	433	78	5	G	A	187	0.171123	0.828877	130	50	7	A	G	95	0.405263	0.405263	35	43	17	G	A	302	0.165563	0.834437	209	86	7	0.75
TIGRP2P306755	23	42076158	3.3E-04	C/T	C	PLSCR5 (upstream)	C	T	513	0.177388	0.822612	351	142	20	C	T	187	0.475936	0.524064	48	100	39	C	T	95	0.173684	0.826316	64	29	2	C	T	302	0.263245	0.736755	165	115	22	0.607143
BICF2P227171	30	17867239	4.9E-04	T/C	T	GNB5 (intronic)	T	C	515	0.0669903	0.93301	446	69	0	T	C	187	0.0802139	0.919786	159	26	2	T	C	95	0.468421	0.531579	24	53	18	T	C	302	0.140728	0.859272	224	71	7	0.891117
Shar-Pei
BICF2S23136666	4	31168913	3.2E-04	C/A	A	NRG3 (intronic)	A	C	514	0.00583658	0.994163	508	6	0	A	C	187	0.820856	0.179144	6	55	126	C	A	95	0.210526	0.210526	60	30	5	A	C	302	0.301325	0.698675	149	124	29	0.674785
BICF2G630552985	7	15555664	4.1E-04	G/A	A	ZNF648 (upstream of)	A	G	515	0.0592233	0.940777	454	61	0	G	A	187	0.358289	0.358289	79	82	26	G	A	96	0.34375	0.34375	43	40	13	G	A	302	0.546358	0.546358	64	146	92	0.666189
BICF2S23410286	7	16196250	2.4E-04	C/T	T	NPL (intronic)	T	C	508	0.182087	0.817913	338	155	15	C	T	186	0.400538	0.400538	69	85	32	C	T	95	0.389474	0.389474	34	48	13	C	T	297	0.392256	0.392256	122	117	58	0.550578
BICF2P1401994	7	17786665	1.3E-04	C/T	T	C1orf21 (intronic)	T	C	513	0.398635	0.601365	192	233	88	T	C	187	0.221925	0.778075	119	53	15	C	T	95	0.489474	0.489474	27	43	25	T	C	302	0.0596026	0.940397	268	32	2	0.632184
BICF2S23136652	7	19673829	7.1E-05	T/C	C	PTGS2 (intronic)	C	T	514	0.0953307	0.904669	425	80	9	C	T	187	0.328877	0.671123	81	89	17	T	C	95	0.0894737	0.0894737	78	17	0	C	T	302	0.322848	0.677152	148	113	41	0.562857
BICF2P1436700	7	22764328	4.4E-04	A/G	G	ASTN1 & PAPPA2 (downstream of)	G	A	516	0.0852713	0.914729	431	82	3	G	A	187	0.318182	0.681818	93	69	25	A	G	95	0.0631579	0.0631579	83	12	0	G	A	302	0.599338	0.400662	55	132	115	0.592857
BICF2P215640	8	16058011	2.0E-04	A/G	G	MIPOL1 & FOXA1 (downstream of)	A	G	513	0.165692	0.165692	361	134	18	A	G	187	0.315508	0.315508	87	82	18	A	G	94	0.473404	0.473404	24	51	19	A	G	301	0.0581395	0.0581395	268	31	2	0.742857
BICF2S2361733	22	20899197	4.1E-04	T/G	G	none, closest gene is PCDH9	T	G	513	0.51462	0.51462	119	260	134	T	G	186	0.0698925	0.0698925	161	24	1	T	G	95	0.347368	0.347368	43	38	14	T	G	298	0.0587248	0.0587248	265	31	2	0.791429
TIGRP2P320304	24	41301998	3.3E-04	T/C	C	downstream of CBLN4	T	C	516	0	0	516	0	0	T	C	187	0.0026738	0.0026738	186	1	0	T	C	95	0.221053	0.221053	57	34	4	T	C	302	0.0198675	0.0198675	290	12	0	0.927143
BICF2S23711428	28	5983856	1.2E-04	G/T	T	HECTD2 (upstream of)	T	G	513	0.261209	0.738791	278	202	33	G	T	187	0.165775	0.165775	131	50	6	G	T	95	0.189474	0.189474	63	28	4	G	T	302	0.375828	0.375828	111	155	36	0.521429
BICF2G630276743	28	7733212	2.4E-04	T/C	T	MYOF (intronic)	T	C	514	0.442607	0.557393	162	249	103	C	T	187	0.328877	0.328877	89	73	25	T	C	95	0.384211	0.615789	34	49	12	C	T	302	0.514901	0.514901	71	151	80	0.65
BICF2G630276012	28	9909408	1.2E-04	A/G	G	TM9SF3 (intronic)	G	A	505	0.273267	0.726733	271	192	42	A	G	187	0.013369	0.013369	183	3	1	A	G	94	0.462766	0.462766	26	49	19	A	G	301	0.360465	0.360465	128	129	44	0.687143
BICF2G630275788	28	10515232	2.7E-05	G/A	G	SLIT1 (intronic)	G	A	513	0	1	513	0	0	G	A	184	0.293478	0.706522	92	76	16	G	A	95	0.426316	0.573684	30	49	16	G	A	297	0.003367	0.996633	295	2	0	0.897361
BICF2P677609	28	18823291	2.2E-04	A/G	G	SORCS1 (intronic)	A	G	514	0.290856	0.290856	266	197	51	A	G	187	0.013369	0.013369	182	5	0	A	G	95	0.126316	0.126316	71	24	0	A	G	302	0.177152	0.177152	209	79	14	0.634286
TIGRP2P404896	35	1981709	2.9E-04	C/T	T	FOXC1 (intronic)	C	T	515	0.616505	0.616505	81	233	201	C	T	187	0.0748663	0.0748663	161	24	2	C	T	95	0.484211	0.484211	23	52	20	C	T	302	0.259934	0.259934	167	113	22	0.744286
BICF2G630772654	35	8300115	2.7E-04	G/A	A	downstream of SLC35B3	G	A	514	0.360895	0.360895	205	247	62	A	G	187	0.446524	0.553476	63	81	43	G	A	93	0.139785	0.139785	69	22	2	A	G	302	0.321192	0.678808	141	128	33	0.507143
