# Supplementary material for: Genome-Wide Analyses Suggest Mechanisms Involving Early B-Cell Development in Canine IgA Deficiency
Source: PLoS One. 2015 Jul 30;10(7):e0133844. doi: 10.1371/journal.pone.0133844 (PMC4520476; doi:10.1371/journal.pone.0133844)
Supplement: S6 Table — (XLSX) [file pone.0133844.s016.xlsx]

## Sheet: GSD_11SNPwindow.txt
Table S6. Fixation using 11 variants per windows (1 variant overlap) in 20 German shepherds across CFA28: 9000091-11999424
no	position	prop fixed
1	9000789	0.909090909090909
2	9000939	0.909090909090909
3	9001032	0.909090909090909
4	9001109	0.909090909090909
5	9001229	0.909090909090909
6	9001674	0.909090909090909
7	9001787	0.818181818181818
8	9001833	0.818181818181818
9	9001982	0.818181818181818
10	9002236	0.818181818181818
11	9002267	0.909090909090909
12	9002509	0.909090909090909
13	9002784	0.909090909090909
14	9002831	0.909090909090909
15	9003437	0.909090909090909
16	9003632	0.909090909090909
17	9003633	0.909090909090909
18	9003904	1
19	9004320	1
20	9004520	1
21	9004564	1
22	9004919	1
23	9005309	1
24	9005338	0.909090909090909
25	9005502	0.909090909090909
26	9005638	0.909090909090909
27	9005688	0.909090909090909
28	9006019	0.909090909090909
29	9006568	0.909090909090909
30	9007042	0.909090909090909
31	9007529	0.909090909090909
32	9008103	0.818181818181818
33	9008419	0.727272727272727
34	9008506	0.727272727272727
35	9008594	0.818181818181818
36	9008801	0.818181818181818
37	9008900	0.818181818181818
38	9009257	0.727272727272727
39	9009318	0.727272727272727
40	9009369	0.727272727272727
41	9009943	0.727272727272727
42	9010058	0.727272727272727
43	9010471	0.727272727272727
44	9011133	0.818181818181818
45	9011297	0.818181818181818
46	9011572	0.818181818181818
47	9011586	0.818181818181818
48	9012020	0.818181818181818
49	9012155	0.909090909090909
50	9012207	0.909090909090909
51	9012229	0.909090909090909
52	9012232	0.909090909090909
53	9012244	0.909090909090909
54	9012364	1
55	9012499	1
56	9012965	1
57	9013095	1
58	9013098	1
59	9013127	1
60	9013382	1
61	9013443	1
62	9013453	1
63	9013626	1
64	9013745	1
65	9013848	0.909090909090909
66	9013894	0.909090909090909
67	9013951	0.909090909090909
68	9014048	0.909090909090909
69	9014089	0.909090909090909
70	9014093	0.909090909090909
71	9014112	0.909090909090909
72	9014138	0.909090909090909
73	9014282	0.909090909090909
74	9014788	0.909090909090909
75	9014789	0.909090909090909
76	9014793	1
77	9014795	1
78	9014797	1
79	9014841	1
80	9014988	1
81	9015209	1
82	9015491	1
83	9015823	0.909090909090909
84	9016088	0.909090909090909
85	9016103	0.909090909090909
86	9016322	0.909090909090909
87	9016326	0.909090909090909
88	9016330	0.818181818181818
89	9016360	0.818181818181818
90	9016682	0.818181818181818
91	9016800	0.818181818181818
92	9016982	0.818181818181818
93	9017130	0.727272727272727
94	9017172	0.727272727272727
95	9017284	0.727272727272727
96	9017304	0.636363636363636
97	9017446	0.636363636363636
98	9017524	0.636363636363636
99	9017528	0.636363636363636
100	9017953	0.636363636363636
101	9018548	0.636363636363636
102	9018662	0.636363636363636
103	9018674	0.636363636363636
104	9018856	0.727272727272727
105	9018860	0.818181818181818
106	9018864	0.818181818181818
107	9019603	0.909090909090909
108	9019751	0.909090909090909
109	9020694	0.909090909090909
110	9020794	1
111	9020798	1
112	9021002	0.909090909090909
113	9022289	0.909090909090909
114	9022290	0.818181818181818
115	9022351	0.818181818181818
116	9022352	0.818181818181818
117	9022420	0.727272727272727
118	9022668	0.727272727272727
119	9022984	0.727272727272727
120	9023016	0.636363636363636
121	9023157	0.636363636363636
122	9023159	0.636363636363636
123	9023202	0.636363636363636
124	9023408	0.636363636363636
125	9023450	0.727272727272727
126	9023552	0.727272727272727
127	9024684	0.727272727272727
128	9024720	0.818181818181818
129	9024730	0.818181818181818
130	9024778	0.818181818181818
131	9025290	0.909090909090909
132	9025339	0.909090909090909
133	9025345	0.909090909090909
134	9025361	1
135	9025362	1
136	9025730	1
137	9025731	1
138	9025899	1
139	9026013	1
140	9026014	0.909090909090909
141	9026018	0.909090909090909
142	9026023	0.909090909090909
143	9026048	0.909090909090909
144	9026069	0.909090909090909
145	9026275	0.909090909090909
146	9026405	0.909090909090909
147	9026635	0.909090909090909
148	9026679	0.818181818181818
149	9026960	0.818181818181818
150	9027069	0.818181818181818
151	9028226	0.818181818181818
152	9028471	0.727272727272727
153	9029031	0.636363636363636
154	9029032	0.636363636363636
155	9029064	0.545454545454545
156	9029759	0.545454545454545
157	9029808	0.545454545454545
158	9029810	0.545454545454545
159	9029956	0.545454545454545
160	9030144	0.545454545454545
161	9030185	0.454545454545455
162	9030186	0.545454545454545
163	9030657	0.545454545454545
164	9030699	0.636363636363636
165	9031234	0.636363636363636
166	9031701	0.727272727272727
167	9031738	0.636363636363636
168	9031741	0.636363636363636
169	9032465	0.636363636363636
170	9033585	0.727272727272727
171	9033586	0.727272727272727
172	9033837	0.727272727272727
173	9034448	0.727272727272727
174	9035127	0.818181818181818
175	9035331	0.818181818181818
176	9036932	0.818181818181818
177	9037083	0.818181818181818
178	9037089	0.909090909090909
179	9037329	0.909090909090909
180	9037585	0.818181818181818
181	9037594	0.818181818181818
182	9037846	0.818181818181818
183	9038349	0.909090909090909
184	9038962	0.909090909090909
185	9039044	0.818181818181818
186	9039059	0.727272727272727
187	9039125	0.727272727272727
188	9039672	0.727272727272727
189	9039766	0.727272727272727
190	9040250	0.727272727272727
191	9040258	0.818181818181818
192	9040648	0.818181818181818
193	9040777	0.818181818181818
194	9040794	0.818181818181818
195	9040979	0.818181818181818
196	9040991	0.909090909090909
197	9041256	1
198	9041508	1
199	9041559	1
200	9041584	1
201	9042088	1
202	9042090	1
203	9042656	1
204	9042713	1
205	9043052	1
206	9046466	1
207	9046907	1
208	9047244	1
209	9047405	1
210	9047791	1
211	9048050	0.909090909090909
212	9048208	0.909090909090909
213	9048224	0.909090909090909
214	9048896	0.909090909090909
215	9049363	0.909090909090909
216	9049366	0.909090909090909
217	9049429	0.909090909090909
218	9050173	0.909090909090909
219	9050240	0.909090909090909
220	9051784	0.818181818181818
221	9051823	0.818181818181818
222	9051826	0.909090909090909
223	9052674	0.909090909090909
224	9052923	0.818181818181818
225	9052947	0.818181818181818
226	9053125	0.818181818181818
227	9053140	0.818181818181818
228	9053532	0.818181818181818
229	9055264	0.818181818181818
230	9056134	0.818181818181818
231	9056143	0.909090909090909
232	9056457	0.818181818181818
233	9057481	0.727272727272727
234	9058292	0.727272727272727
235	9059203	0.818181818181818
236	9059843	0.818181818181818
237	9060075	0.818181818181818
238	9060852	0.818181818181818
239	9061609	0.727272727272727
240	9061679	0.636363636363636
241	9061900	0.545454545454545
242	9062033	0.454545454545455
243	9062147	0.454545454545455
244	9062361	0.454545454545455
245	9063282	0.454545454545455
246	9063400	0.363636363636364
247	9064386	0.272727272727273
248	9064472	0.272727272727273
249	9064477	0.272727272727273
250	9064668	0.272727272727273
251	9065709	0.363636363636364
252	9066664	0.454545454545455
253	9066770	0.545454545454545
254	9067055	0.545454545454545
255	9068116	0.636363636363636
256	9068122	0.545454545454545
257	9068140	0.636363636363636
258	9068147	0.727272727272727
259	9068158	0.727272727272727
260	9068456	0.636363636363636
261	9068849	0.727272727272727
262	9068872	0.727272727272727
263	9069173	0.727272727272727
264	9069266	0.727272727272727
265	9069399	0.818181818181818
266	9069746	0.727272727272727
267	9070332	0.818181818181818
268	9071571	0.727272727272727
269	9071574	0.636363636363636
270	9071694	0.636363636363636
271	9071730	0.727272727272727
272	9072256	0.636363636363636
273	9073177	0.545454545454545
274	9073184	0.454545454545455
275	9073654	0.363636363636364
276	9073869	0.272727272727273
277	9073993	0.272727272727273
278	9073995	0.181818181818182
279	9074033	0.181818181818182
280	9074037	0.181818181818182
281	9074750	0.181818181818182
282	9075130	0.0909090909090909
283	9075511	0.0909090909090909
284	9075676	0.0909090909090909
285	9075684	0.0909090909090909
286	9076002	0.0909090909090909
287	9076092	0.0909090909090909
288	9076158	0.0909090909090909
289	9076182	0.0909090909090909
290	9076673	0.0909090909090909
291	9076764	0.0909090909090909
292	9076812	0
293	9076821	0
294	9076835	0
295	9076846	0
296	9076857	0
297	9076902	0
298	9076908	0
299	9076958	0
300	9077225	0
301	9077262	0
302	9077365	0
303	9077504	0
304	9077715	0
305	9077725	0
306	9078016	0
307	9078201	0
308	9078207	0
309	9078254	0
310	9078267	0
311	9078294	0
312	9078307	0
313	9078314	0
314	9078760	0
315	9079172	0
316	9079178	0
317	9079196	0
318	9079218	0.0909090909090909
319	9079312	0.181818181818182
320	9079313	0.272727272727273
321	9079508	0.272727272727273
322	9079509	0.272727272727273
323	9079784	0.272727272727273
324	9080212	0.363636363636364
325	9080216	0.363636363636364
326	9080219	0.363636363636364
327	9080220	0.363636363636364
328	9080303	0.363636363636364
329	9080344	0.272727272727273
330	9080453	0.181818181818182
331	9080484	0.0909090909090909
332	9080539	0.0909090909090909
333	9081156	0.0909090909090909
334	9081540	0.0909090909090909
335	9081732	0
336	9082462	0
337	9082581	0
338	9082712	0
339	9082716	0
340	9082732	0
341	9082740	0
342	9083013	0
343	9083057	0
344	9083137	0
345	9083675	0
346	9084375	0
347	9084629	0
348	9084938	0
349	9085196	0
350	9085578	0.0909090909090909
351	9085618	0.181818181818182
352	9086088	0.181818181818182
353	9086258	0.181818181818182
354	9086297	0.181818181818182
355	9086512	0.181818181818182
356	9086603	0.181818181818182
357	9086707	0.181818181818182
358	9086913	0.181818181818182
359	9087018	0.181818181818182
360	9087957	0.181818181818182
361	9088172	0.181818181818182
362	9088444	0.0909090909090909
363	9088609	0.181818181818182
364	9088684	0.181818181818182
365	9088799	0.272727272727273
366	9088927	0.363636363636364
367	9089022	0.454545454545455
368	9089105	0.545454545454545
369	9089203	0.545454545454545
370	9089232	0.636363636363636
371	9089415	0.727272727272727
372	9090136	0.636363636363636
373	9090764	0.727272727272727
374	9090988	0.636363636363636
375	9091191	0.727272727272727
376	9091307	0.636363636363636
377	9091652	0.545454545454545
378	9091771	0.454545454545455
379	9091923	0.363636363636364
380	9092080	0.363636363636364
381	9092223	0.272727272727273
382	9092909	0.181818181818182
383	9093041	0.272727272727273
384	9093112	0.272727272727273
385	9093187	0.272727272727273
386	9093590	0.272727272727273
387	9093627	0.272727272727273
388	9093630	0.272727272727273
389	9093633	0.363636363636364
390	9093635	0.363636363636364
391	9093641	0.363636363636364
392	9094162	0.454545454545455
393	9094920	0.454545454545455
394	9095328	0.363636363636364
395	9095562	0.363636363636364
396	9095605	0.363636363636364
397	9095719	0.363636363636364
398	9095822	0.363636363636364
399	9096051	0.454545454545455
400	9096278	0.363636363636364
401	9096366	0.363636363636364
402	9096449	0.454545454545455
403	9096503	0.363636363636364
404	9096636	0.454545454545455
405	9097105	0.454545454545455
406	9097982	0.454545454545455
407	9098466	0.545454545454545
408	9098761	0.454545454545455
409	9099002	0.545454545454545
410	9099249	0.545454545454545
411	9099266	0.545454545454545
412	9099550	0.636363636363636
413	9099640	0.545454545454545
414	9100002	0.636363636363636
415	9100006	0.545454545454545
416	9100067	0.636363636363636
417	9100103	0.636363636363636
418	9100185	0.636363636363636
419	9100333	0.636363636363636
420	9100450	0.636363636363636
421	9100716	0.636363636363636
422	9100869	0.727272727272727
423	9101114	0.727272727272727
424	9101296	0.818181818181818
425	9102150	0.818181818181818
426	9102269	0.818181818181818
427	9102282	0.727272727272727
428	9102285	0.727272727272727
429	9102675	0.727272727272727
430	9103023	0.818181818181818
431	9103084	0.818181818181818
432	9103085	0.818181818181818
433	9103207	0.818181818181818
434	9103230	0.727272727272727
435	9103393	0.636363636363636
436	9103559	0.545454545454545
437	9104029	0.636363636363636
438	9104106	0.727272727272727
439	9104152	0.636363636363636
440	9104461	0.545454545454545
441	9104565	0.545454545454545
442	9104842	0.545454545454545
443	9104935	0.454545454545455
444	9105010	0.454545454545455
445	9105019	0.454545454545455
446	9105026	0.454545454545455
447	9105332	0.545454545454545
448	9105405	0.454545454545455
449	9105780	0.454545454545455
450	9106125	0.545454545454545
451	9106133	0.545454545454545
452	9106477	0.454545454545455
453	9106924	0.454545454545455
454	9107300	0.454545454545455
455	9107320	0.454545454545455
456	9107462	0.545454545454545
457	9107744	0.545454545454545
458	9108048	0.545454545454545
459	9108085	0.636363636363636
460	9108126	0.636363636363636
461	9108519	0.636363636363636
462	9108535	0.636363636363636
463	9108685	0.727272727272727
464	9108720	0.727272727272727
465	9108873	0.818181818181818
466	9108950	0.818181818181818
467	9108980	0.818181818181818
468	9109317	0.909090909090909
469	9109371	0.909090909090909
470	9109634	0.909090909090909
471	9109805	0.818181818181818
472	9110262	0.818181818181818
473	9110338	0.909090909090909
474	9110411	0.818181818181818
475	9110488	0.818181818181818
476	9110514	0.818181818181818
477	9110601	0.818181818181818
478	9110604	0.727272727272727
479	9110928	0.727272727272727
480	9111013	0.727272727272727
481	9111170	0.727272727272727
482	9111254	0.727272727272727
483	9111556	0.727272727272727
484	9111695	0.727272727272727
485	9112237	0.818181818181818
486	9113042	0.818181818181818
487	9113206	0.818181818181818
488	9113447	0.727272727272727
489	9113448	0.818181818181818
490	9113458	0.818181818181818
491	9113486	0.727272727272727
492	9113601	0.727272727272727
493	9113608	0.727272727272727
494	9113777	0.727272727272727
495	9113925	0.727272727272727
496	9114091	0.727272727272727
497	9114192	0.727272727272727
498	9114394	0.727272727272727
499	9114401	0.727272727272727
500	9114999	0.727272727272727
501	9115428	0.636363636363636
502	9115456	0.636363636363636
503	9115654	0.545454545454545
504	9115933	0.636363636363636
505	9116460	0.636363636363636
506	9117028	0.636363636363636
507	9117210	0.636363636363636
508	9117252	0.636363636363636
509	9117980	0.636363636363636
510	9117981	0.636363636363636
511	9118004	0.636363636363636
512	9118072	0.727272727272727
513	9118145	0.727272727272727
514	9118226	0.727272727272727
515	9118408	0.727272727272727
516	9118672	0.727272727272727
517	9118674	0.636363636363636
518	9118781	0.636363636363636
519	9118803	0.636363636363636
520	9119002	0.545454545454545
521	9119203	0.636363636363636
522	9119345	0.545454545454545
523	9119362	0.545454545454545
524	9119470	0.545454545454545
525	9119870	0.636363636363636
526	9120006	0.545454545454545
527	9120038	0.545454545454545
528	9120081	0.545454545454545
529	9120109	0.454545454545455
530	9120303	0.363636363636364
531	9120801	0.454545454545455
532	9121069	0.363636363636364
533	9121180	0.454545454545455
534	9121516	0.454545454545455
535	9122021	0.545454545454545
536	9122067	0.545454545454545
537	9122560	0.545454545454545
538	9122818	0.454545454545455
539	9122925	0.545454545454545
540	9123875	0.636363636363636
541	9123928	0.727272727272727
542	9123957	0.727272727272727
543	9124006	0.818181818181818
544	9124042	0.818181818181818
545	9124060	0.727272727272727
546	9124061	0.727272727272727
547	9124281	0.727272727272727
548	9124572	0.818181818181818
549	9124752	0.909090909090909
550	9124828	0.909090909090909
551	9124843	0.909090909090909
552	9124899	0.909090909090909
553	9124901	0.909090909090909
554	9124972	0.909090909090909
555	9124982	0.818181818181818
556	9125096	0.909090909090909
557	9126738	0.909090909090909
558	9127083	0.909090909090909
559	9127129	0.909090909090909
560	9127181	0.909090909090909
561	9127226	0.818181818181818
562	9127250	0.818181818181818
563	9127363	0.818181818181818
564	9127803	0.818181818181818
565	9127952	0.818181818181818
566	9128086	0.909090909090909
567	9128585	0.909090909090909
568	9128938	0.818181818181818
569	9129276	0.727272727272727
570	9129297	0.727272727272727
571	9129460	0.636363636363636
572	9129912	0.636363636363636
573	9129963	0.636363636363636
574	9129964	0.636363636363636
575	9130261	0.545454545454545
576	9130795	0.454545454545455
577	9130813	0.363636363636364
578	9130936	0.363636363636364
579	9130939	0.363636363636364
580	9131645	0.454545454545455
581	9132326	0.363636363636364
582	9132540	0.454545454545455
583	9134968	0.545454545454545
584	9135012	0.545454545454545
585	9135153	0.545454545454545
586	9135492	0.636363636363636
587	9135625	0.727272727272727
588	9136723	0.727272727272727
589	9136768	0.636363636363636
590	9136846	0.727272727272727
591	9136848	0.727272727272727
592	9136969	0.727272727272727
593	9137075	0.636363636363636
594	9137096	0.545454545454545
595	9137144	0.545454545454545
596	9137614	0.454545454545455
597	9138170	0.454545454545455
598	9138203	0.454545454545455
599	9138235	0.545454545454545
600	9139044	0.545454545454545
601	9139062	0.545454545454545
602	9139324	0.545454545454545
603	9139613	0.545454545454545
604	9139644	0.636363636363636
605	9139804	0.727272727272727
606	9139909	0.727272727272727
607	9140077	0.818181818181818
608	9140530	0.818181818181818
609	9140720	0.818181818181818
610	9140804	0.818181818181818
611	9141197	0.818181818181818
612	9141271	0.727272727272727
613	9141396	0.636363636363636
614	9142392	0.636363636363636
615	9142600	0.545454545454545
616	9142635	0.454545454545455
617	9142668	0.363636363636364
618	9142680	0.272727272727273
619	9142841	0.181818181818182
620	9142881	0.0909090909090909
621	9143006	0
622	9143377	0.0909090909090909
623	9143426	0.181818181818182
624	9143525	0.181818181818182
625	9143900	0.272727272727273
626	9144440	0.363636363636364
627	9144446	0.363636363636364
628	9144686	0.363636363636364
629	9145028	0.363636363636364
630	9145032	0.454545454545455
631	9145038	0.545454545454545
632	9145148	0.636363636363636
633	9145161	0.636363636363636
634	9145164	0.545454545454545
635	9145226	0.545454545454545
636	9145643	0.454545454545455
637	9145790	0.454545454545455
638	9145810	0.545454545454545
639	9145957	0.545454545454545
640	9146538	0.636363636363636
641	9146594	0.636363636363636
642	9146977	0.636363636363636
643	9147023	0.545454545454545
644	9147135	0.454545454545455
645	9147162	0.545454545454545
646	9147164	0.545454545454545
647	9147406	0.545454545454545
648	9149465	0.545454545454545
649	9150836	0.454545454545455
650	9153248	0.454545454545455
651	9157090	0.363636363636364
652	9157133	0.363636363636364
653	9158152	0.272727272727273
654	9158201	0.272727272727273
655	9158997	0.363636363636364
656	9159272	0.363636363636364
657	9160165	0.454545454545455
658	9160327	0.454545454545455
659	9160429	0.454545454545455
660	9160757	0.545454545454545
661	9161374	0.636363636363636
662	9161866	0.727272727272727
663	9162302	0.636363636363636
664	9163197	0.636363636363636
665	9163247	0.636363636363636
666	9164020	0.545454545454545
667	9164559	0.454545454545455
668	9164798	0.454545454545455
669	9165080	0.454545454545455
670	9165804	0.363636363636364
671	9166894	0.272727272727273
672	9167364	0.181818181818182
673	9167454	0.0909090909090909
674	9168441	0.181818181818182
675	9168549	0.272727272727273
676	9169426	0.272727272727273
677	9170031	0.272727272727273
678	9170724	0.363636363636364
679	9171159	0.363636363636364
680	9175560	0.454545454545455
681	9175795	0.454545454545455
682	9178631	0.545454545454545
683	9180681	0.545454545454545
684	9180806	0.545454545454545
685	9180948	0.454545454545455
686	9181107	0.454545454545455
687	9181265	0.454545454545455
688	9184306	0.454545454545455
689	9187030	0.454545454545455
690	9187804	0.363636363636364
691	9188964	0.363636363636364
692	9190252	0.454545454545455
693	9190810	0.454545454545455
694	9191746	0.545454545454545
695	9194302	0.545454545454545
696	9195381	0.545454545454545
697	9195814	0.454545454545455
698	9197247	0.454545454545455
699	9200444	0.454545454545455
700	9200919	0.363636363636364
701	9202338	0.363636363636364
702	9202393	0.272727272727273
703	9203008	0.272727272727273
704	9203378	0.272727272727273
705	9204202	0.272727272727273
706	9205805	0.363636363636364
707	9205814	0.454545454545455
708	9208416	0.454545454545455
709	9208559	0.454545454545455
710	9208833	0.454545454545455
711	9210336	0.454545454545455
712	9211793	0.545454545454545
713	9214201	0.636363636363636
714	9218725	0.545454545454545
715	9220104	0.454545454545455
716	9221330	0.363636363636364
717	9222795	0.272727272727273
718	9224068	0.272727272727273
719	9224369	0.363636363636364
720	9225820	0.454545454545455
721	9225982	0.454545454545455
722	9226256	0.545454545454545
723	9226379	0.454545454545455
724	9226462	0.454545454545455
725	9229209	0.454545454545455
726	9231342	0.454545454545455
727	9234080	0.545454545454545
728	9235371	0.636363636363636
729	9235627	0.636363636363636
730	9236536	0.545454545454545
731	9241046	0.454545454545455
732	9241915	0.454545454545455
733	9242810	0.363636363636364
734	9245246	0.363636363636364
735	9245562	0.272727272727273
736	9245594	0.363636363636364
737	9245609	0.454545454545455
738	9246068	0.454545454545455
739	9249971	0.363636363636364
740	9252355	0.363636363636364
741	9255857	0.363636363636364
742	9256832	0.454545454545455
743	9258279	0.454545454545455
744	9260451	0.545454545454545
745	9262984	0.545454545454545
746	9263081	0.545454545454545
747	9263695	0.545454545454545
748	9266238	0.454545454545455
749	9266559	0.454545454545455
750	9268562	0.545454545454545
751	9270413	0.454545454545455
752	9270532	0.545454545454545
753	9271166	0.454545454545455
754	9274164	0.545454545454545
755	9274623	0.454545454545455
756	9274782	0.545454545454545
757	9276305	0.545454545454545
758	9279792	0.545454545454545
759	9279868	0.636363636363636
760	9279890	0.636363636363636
761	9282265	0.636363636363636
762	9286422	0.727272727272727
763	9289479	0.727272727272727
764	9289501	0.818181818181818
765	9289508	0.818181818181818
766	9289522	0.909090909090909
767	9289527	0.909090909090909
768	9289532	1
769	9289540	1
770	9289550	1
771	9289551	1
772	9289563	1
773	9289582	1
774	9289586	1
775	9289594	1
776	9289602	0.909090909090909
777	9289611	0.818181818181818
778	9289613	0.727272727272727
779	9289628	0.727272727272727
780	9289678	0.727272727272727
781	9289765	0.636363636363636
782	9291028	0.636363636363636
783	9292480	0.545454545454545
784	9292702	0.545454545454545
785	9293543	0.454545454545455
786	9294590	0.363636363636364
787	9295280	0.454545454545455
788	9296459	0.454545454545455
789	9297124	0.545454545454545
790	9297705	0.545454545454545
791	9297733	0.454545454545455
792	9297746	0.545454545454545
793	9299280	0.454545454545455
794	9302028	0.545454545454545
795	9303306	0.545454545454545
796	9307062	0.545454545454545
797	9307815	0.636363636363636
798	9310023	0.545454545454545
799	9310572	0.545454545454545
800	9313118	0.545454545454545
801	9313791	0.454545454545455
802	9314189	0.545454545454545
803	9314438	0.454545454545455
804	9315188	0.454545454545455
805	9315208	0.454545454545455
806	9318528	0.454545454545455
807	9320292	0.545454545454545
808	9320305	0.545454545454545
809	9320833	0.545454545454545
810	9322001	0.545454545454545
811	9323951	0.454545454545455
812	9325691	0.545454545454545
813	9326224	0.454545454545455
814	9330049	0.545454545454545
815	9330093	0.636363636363636
816	9338162	0.545454545454545
817	9338671	0.545454545454545
818	9339342	0.454545454545455
819	9340687	0.454545454545455
820	9342346	0.454545454545455
821	9342381	0.545454545454545
822	9344449	0.636363636363636
823	9346223	0.545454545454545
824	9346437	0.636363636363636
825	9347895	0.545454545454545
826	9349792	0.454545454545455
827	9350405	0.454545454545455
828	9351340	0.454545454545455
829	9352037	0.545454545454545
830	9355014	0.545454545454545
831	9356156	0.636363636363636
832	9356483	0.545454545454545
833	9357139	0.454545454545455
834	9357371	0.454545454545455
835	9357778	0.363636363636364
836	9359170	0.363636363636364
837	9359227	0.363636363636364
838	9359764	0.454545454545455
839	9360813	0.363636363636364
840	9361289	0.363636363636364
841	9361760	0.272727272727273
842	9361762	0.181818181818182
843	9362169	0.181818181818182
844	9363389	0.272727272727273
845	9363703	0.363636363636364
846	9363721	0.454545454545455
847	9363727	0.545454545454545
848	9363729	0.636363636363636
849	9364175	0.636363636363636
850	9364724	0.727272727272727
851	9365482	0.727272727272727
852	9365955	0.727272727272727
853	9366573	0.727272727272727
854	9367828	0.727272727272727
855	9367875	0.636363636363636
856	9367881	0.545454545454545
857	9368763	0.454545454545455
858	9370512	0.363636363636364
859	9371129	0.363636363636364
860	9371139	0.363636363636364
861	9371311	0.272727272727273
862	9371383	0.181818181818182
863	9371461	0.272727272727273
864	9372170	0.363636363636364
865	9372185	0.454545454545455
866	9372781	0.545454545454545
867	9374018	0.636363636363636
868	9374197	0.727272727272727
869	9374225	0.818181818181818
870	9374408	0.818181818181818
871	9375292	0.727272727272727
872	9375559	0.818181818181818
873	9376063	0.909090909090909
874	9376620	0.818181818181818
875	9376724	0.818181818181818
876	9377246	0.727272727272727
877	9377362	0.636363636363636
878	9377406	0.636363636363636
879	9378066	0.636363636363636
880	9378352	0.636363636363636
881	9379155	0.636363636363636
882	9379714	0.727272727272727
883	9379904	0.727272727272727
884	9379915	0.727272727272727
885	9381902	0.818181818181818
886	9382377	0.818181818181818
887	9382570	0.818181818181818
888	9382869	0.818181818181818
889	9383106	0.727272727272727
890	9383420	0.727272727272727
891	9383516	0.727272727272727
892	9383681	0.727272727272727
893	9384144	0.727272727272727
894	9384153	0.727272727272727
895	9384469	0.636363636363636
896	9384854	0.545454545454545
897	9384896	0.545454545454545
898	9385165	0.636363636363636
899	9385324	0.727272727272727
900	9385492	0.727272727272727
901	9385817	0.727272727272727
902	9385948	0.727272727272727
903	9386281	0.727272727272727
904	9386287	0.727272727272727
905	9387287	0.727272727272727
906	9387331	0.818181818181818
907	9387708	0.909090909090909
908	9387720	0.909090909090909
909	9387722	0.818181818181818
910	9388020	0.818181818181818
911	9388110	0.909090909090909
912	9388356	0.909090909090909
913	9388423	0.909090909090909
914	9388498	0.909090909090909
915	9388688	0.909090909090909
916	9388702	0.909090909090909
917	9388808	0.818181818181818
918	9388923	0.818181818181818
919	9389027	0.818181818181818
920	9389031	0.818181818181818
921	9389127	0.818181818181818
922	9389456	0.818181818181818
923	9389930	0.727272727272727
924	9390113	0.727272727272727
925	9390141	0.727272727272727
926	9390148	0.727272727272727
927	9390206	0.727272727272727
928	9390620	0.818181818181818
929	9390863	0.727272727272727
930	9390877	0.727272727272727
931	9391347	0.818181818181818
932	9391436	0.818181818181818
933	9391460	0.818181818181818
934	9391949	0.909090909090909
935	9392036	0.909090909090909
936	9392240	0.909090909090909
937	9392571	0.909090909090909
938	9392725	0.909090909090909
939	9392832	0.909090909090909
940	9393098	1
941	9393371	0.909090909090909
942	9393865	0.818181818181818
943	9393906	0.818181818181818
944	9394201	0.818181818181818
945	9394334	0.727272727272727
946	9394397	0.727272727272727
947	9394399	0.727272727272727
948	9394573	0.727272727272727
949	9394893	0.727272727272727
950	9394988	0.727272727272727
951	9395160	0.727272727272727
952	9395301	0.818181818181818
953	9395358	0.909090909090909
954	9397180	0.909090909090909
955	9397221	0.909090909090909
956	9397328	1
957	9397335	1
958	9397356	1
959	9397587	1
960	9397666	1
961	9398030	1
962	9398401	1
963	9398419	1
964	9398455	1
965	9398642	0.909090909090909
966	9398643	0.818181818181818
967	9398660	0.818181818181818
968	9398733	0.818181818181818
969	9399036	0.818181818181818
970	9399350	0.818181818181818
971	9399378	0.818181818181818
972	9399604	0.727272727272727
973	9399605	0.727272727272727
974	9399623	0.727272727272727
975	9399641	0.727272727272727
976	9399673	0.818181818181818
977	9399755	0.909090909090909
978	9399791	0.818181818181818
979	9399927	0.818181818181818
980	9400413	0.818181818181818
981	9400472	0.818181818181818
982	9400654	0.818181818181818
983	9400813	0.909090909090909
984	9400892	0.909090909090909
985	9401088	0.818181818181818
986	9401781	0.818181818181818
987	9401846	0.818181818181818
988	9401855	0.727272727272727
989	9402130	0.727272727272727
990	9402175	0.727272727272727
991	9402275	0.727272727272727
992	9402316	0.727272727272727
993	9402515	0.727272727272727
994	9402517	0.727272727272727
995	9403020	0.727272727272727
996	9403055	0.818181818181818
997	9403414	0.727272727272727
998	9403486	0.727272727272727
999	9403716	0.818181818181818
1000	9403888	0.909090909090909
1001	9403982	0.909090909090909
1002	9404223	0.909090909090909
1003	9404561	0.909090909090909
1004	9404634	0.909090909090909
1005	9404838	0.909090909090909
1006	9404885	0.909090909090909
1007	9405333	0.909090909090909
1008	9405405	1
1009	9405444	1
1010	9405823	1
1011	9405940	1
1012	9406050	1
1013	9406264	1
1014	9406371	0.909090909090909
1015	9406496	0.818181818181818
1016	9406604	0.818181818181818
1017	9406877	0.818181818181818
1018	9406943	0.727272727272727
1019	9407001	0.727272727272727
1020	9407048	0.727272727272727
1021	9407144	0.727272727272727
1022	9407251	0.727272727272727
1023	9407317	0.727272727272727
1024	9407363	0.636363636363636
1025	9407435	0.636363636363636
1026	9407708	0.727272727272727
1027	9408117	0.727272727272727
1028	9408844	0.727272727272727
1029	9409094	0.818181818181818
1030	9409136	0.727272727272727
1031	9409832	0.636363636363636
1032	9412296	0.636363636363636
1033	9412365	0.636363636363636
1034	9412764	0.636363636363636
1035	9413209	0.727272727272727
1036	9414925	0.818181818181818
1037	9414938	0.818181818181818
1038	9414939	0.818181818181818
1039	9414983	0.727272727272727
1040	9415014	0.636363636363636
1041	9415036	0.636363636363636
1042	9415125	0.636363636363636
1043	9415544	0.545454545454545
1044	9416238	0.454545454545455
1045	9416347	0.454545454545455
1046	9416349	0.454545454545455
1047	9416351	0.454545454545455
1048	9416355	0.454545454545455
1049	9417023	0.454545454545455
1050	9417266	0.545454545454545
1051	9417400	0.545454545454545
1052	9417497	0.545454545454545
1053	9418472	0.545454545454545
1054	9418536	0.545454545454545
1055	9419145	0.636363636363636
1056	9419440	0.636363636363636
1057	9420740	0.636363636363636
1058	9422117	0.636363636363636
1059	9422780	0.545454545454545
1060	9423180	0.454545454545455
1061	9423467	0.454545454545455
1062	9423648	0.545454545454545
1063	9423833	0.636363636363636
1064	9423839	0.727272727272727
1065	9423840	0.818181818181818
1066	9425194	0.818181818181818
1067	9425684	0.818181818181818
1068	9425738	0.727272727272727
1069	9425879	0.727272727272727
1070	9425882	0.818181818181818
1071	9425956	0.909090909090909
1072	9426387	0.909090909090909
1073	9426951	0.909090909090909
1074	9427212	0.909090909090909
1075	9427415	0.909090909090909
1076	9427767	0.909090909090909
1077	9428233	0.909090909090909
1078	9428369	0.909090909090909
1079	9428449	1
1080	9428465	1
1081	9428611	1
1082	9428625	1
1083	9428633	1
1084	9428636	1
1085	9428727	1
1086	9428782	1
1087	9428833	1
1088	9428852	1
1089	9428890	1
1090	9428914	1
1091	9428931	1
1092	9429394	1
1093	9429401	1
1094	9429409	1
1095	9429422	1
1096	9429460	1
1097	9429511	1
1098	9429518	1
1099	9429977	1
1100	9430651	1
1101	9431418	1
1102	9431600	1
1103	9431728	1
1104	9431746	1
1105	9431863	1
1106	9431864	1
1107	9431869	1
1108	9432029	1
1109	9432086	1
1110	9432105	1
1111	9432107	1
1112	9432244	1
1113	9432247	1
1114	9432303	1
1115	9432351	1
1116	9432764	1
1117	9432963	1
1118	9433378	1
1119	9433708	1
1120	9433904	1
1121	9434848	1
1122	9435007	1
1123	9435282	0.909090909090909
1124	9435329	0.909090909090909
1125	9435369	0.909090909090909
1126	9435417	0.909090909090909
1127	9435633	0.909090909090909
1128	9435984	0.909090909090909
1129	9436029	0.818181818181818
1130	9436182	0.727272727272727
1131	9436385	0.727272727272727
1132	9436531	0.727272727272727
1133	9437044	0.727272727272727
1134	9437167	0.818181818181818
1135	9437220	0.818181818181818
1136	9438308	0.818181818181818
1137	9438570	0.818181818181818
1138	9438598	0.818181818181818
1139	9439112	0.818181818181818
1140	9439383	0.909090909090909
1141	9439813	1
1142	9439816	0.909090909090909
1143	9439872	0.909090909090909
1144	9440086	0.818181818181818
1145	9440269	0.818181818181818
1146	9440301	0.727272727272727
1147	9440404	0.727272727272727
1148	9441330	0.727272727272727
1149	9441547	0.727272727272727
1150	9441578	0.727272727272727
1151	9441710	0.727272727272727
1152	9441745	0.727272727272727
1153	9441756	0.818181818181818
1154	9442441	0.818181818181818
1155	9442473	0.909090909090909
1156	9442561	0.909090909090909
1157	9442666	1
1158	9442971	1
1159	9443556	0.909090909090909
1160	9443584	0.818181818181818
1161	9443764	0.818181818181818
1162	9443880	0.727272727272727
1163	9444011	0.727272727272727
1164	9444061	0.727272727272727
1165	9444079	0.727272727272727
1166	9444233	0.727272727272727
1167	9444234	0.636363636363636
1168	9444364	0.636363636363636
1169	9444470	0.636363636363636
1170	9445035	0.727272727272727
1171	9445149	0.818181818181818
1172	9445583	0.818181818181818
1173	9445639	0.909090909090909
1174	9445772	0.909090909090909
1175	9445921	0.818181818181818
1176	9445978	0.818181818181818
1177	9445984	0.818181818181818
1178	9446204	0.909090909090909
1179	9446344	0.909090909090909
1180	9446623	0.909090909090909
1181	9447360	0.909090909090909
1182	9448027	0.909090909090909
1183	9448308	0.909090909090909
1184	9448777	0.909090909090909
1185	9448821	0.909090909090909
1186	9448828	1
1187	9449544	1
1188	9449897	1
1189	9449905	1
1190	9450169	1
1191	9450262	1
1192	9450367	1
1193	9450609	1
1194	9450610	1
1195	9450900	1
1196	9451000	1
1197	9451020	1
1198	9451201	1
1199	9451362	1
1200	9451900	1
1201	9452012	0.909090909090909
1202	9452028	0.909090909090909
1203	9452129	0.909090909090909
1204	9452233	0.909090909090909
1205	9452270	0.818181818181818
1206	9452314	0.727272727272727
1207	9452427	0.727272727272727
1208	9452712	0.727272727272727
1209	9452734	0.727272727272727
1210	9453163	0.727272727272727
1211	9453932	0.727272727272727
1212	9454106	0.818181818181818
1213	9454107	0.727272727272727
1214	9454196	0.727272727272727
1215	9454395	0.727272727272727
1216	9454706	0.818181818181818
1217	9454805	0.909090909090909
1218	9455025	0.909090909090909
1219	9455167	0.909090909090909
1220	9455343	0.909090909090909
1221	9455449	0.909090909090909
1222	9455723	0.818181818181818
1223	9455757	0.818181818181818
1224	9455869	0.909090909090909
1225	9455902	0.909090909090909
1226	9456042	0.909090909090909
1227	9456143	0.909090909090909
1228	9456168	0.909090909090909
1229	9456189	0.909090909090909
1230	9456651	0.909090909090909
1231	9456873	0.909090909090909
1232	9456996	0.909090909090909
1233	9457229	1
1234	9457587	1
1235	9457713	1
1236	9457811	0.909090909090909
1237	9457928	0.909090909090909
1238	9457936	0.909090909090909
1239	9458001	0.909090909090909
1240	9458292	0.909090909090909
1241	9458778	0.909090909090909
1242	9458795	0.909090909090909
1243	9459245	0.909090909090909
1244	9459498	0.909090909090909
1245	9459828	0.818181818181818
1246	9459891	0.727272727272727
1247	9460192	0.727272727272727
1248	9461215	0.727272727272727
1249	9461439	0.727272727272727
1250	9462044	0.727272727272727
1251	9462052	0.727272727272727
1252	9462054	0.727272727272727
1253	9462408	0.727272727272727
1254	9462535	0.636363636363636
1255	9462713	0.636363636363636
1256	9462752	0.727272727272727
1257	9462942	0.818181818181818
1258	9463848	0.909090909090909
1259	9463906	0.818181818181818
1260	9463999	0.818181818181818
1261	9464086	0.727272727272727
1262	9464290	0.727272727272727
1263	9464350	0.727272727272727
1264	9464386	0.727272727272727
1265	9465510	0.818181818181818
1266	9465524	0.818181818181818
1267	9465616	0.818181818181818
1268	9465675	0.818181818181818
1269	9466782	0.818181818181818
1270	9466972	0.909090909090909
1271	9467047	0.909090909090909
1272	9467215	1
1273	9467298	1
1274	9467639	1
1275	9467695	0.909090909090909
1276	9467980	0.818181818181818
1277	9468105	0.818181818181818
1278	9468372	0.818181818181818
1279	9468424	0.818181818181818
1280	9468495	0.818181818181818
1281	9468515	0.818181818181818
1282	9468894	0.818181818181818
1283	9468919	0.818181818181818
1284	9469082	0.818181818181818
1285	9469240	0.727272727272727
1286	9469513	0.818181818181818
1287	9469663	0.909090909090909
1288	9469964	0.909090909090909
1289	9470952	0.818181818181818
1290	9471337	0.818181818181818
1291	9471374	0.818181818181818
1292	9471647	0.727272727272727
1293	9471683	0.727272727272727
1294	9471820	0.727272727272727
1295	9471824	0.636363636363636
1296	9471834	0.727272727272727
1297	9471878	0.727272727272727
1298	9472139	0.727272727272727
1299	9472160	0.727272727272727
1300	9472164	0.818181818181818
1301	9472507	0.727272727272727
1302	9472509	0.636363636363636
1303	9472687	0.727272727272727
1304	9472771	0.727272727272727
1305	9472811	0.727272727272727
1306	9472976	0.818181818181818
1307	9473107	0.818181818181818
1308	9473232	0.727272727272727
1309	9473467	0.727272727272727
1310	9473630	0.636363636363636
1311	9473921	0.636363636363636
1312	9474078	0.727272727272727
1313	9474098	0.727272727272727
1314	9474243	0.727272727272727
1315	9474274	0.727272727272727
1316	9474534	0.727272727272727
1317	9475305	0.727272727272727
1318	9475872	0.727272727272727
1319	9475873	0.818181818181818
1320	9477403	0.818181818181818
1321	9477706	0.909090909090909
1322	9480667	0.818181818181818
1323	9481732	0.818181818181818
1324	9484016	0.818181818181818
1325	9484192	0.727272727272727
1326	9484730	0.636363636363636
1327	9485452	0.636363636363636
1328	9485454	0.636363636363636
1329	9485472	0.545454545454545
1330	9486159	0.545454545454545
1331	9486719	0.545454545454545
1332	9487304	0.545454545454545
1333	9488801	0.545454545454545
1334	9489052	0.454545454545455
1335	9489128	0.454545454545455
1336	9489474	0.454545454545455
1337	9490421	0.454545454545455
1338	9492278	0.454545454545455
1339	9492364	0.363636363636364
1340	9492496	0.363636363636364
1341	9492789	0.272727272727273
1342	9492936	0.181818181818182
1343	9493004	0.0909090909090909
1344	9493238	0.0909090909090909
1345	9493368	0.181818181818182
1346	9493572	0.181818181818182
1347	9493903	0.181818181818182
1348	9494588	0.181818181818182
1349	9494885	0.0909090909090909
1350	9494918	0.0909090909090909
1351	9495016	0.0909090909090909
1352	9495288	0.0909090909090909
1353	9495331	0.0909090909090909
1354	9495351	0.181818181818182
1355	9495479	0.181818181818182
1356	9495505	0.0909090909090909
1357	9495512	0.0909090909090909
1358	9495626	0.0909090909090909
1359	9495731	0.0909090909090909
1360	9495755	0.0909090909090909
1361	9495778	0.0909090909090909
1362	9496008	0.0909090909090909
1363	9496100	0.0909090909090909
1364	9496179	0.0909090909090909
1365	9496208	0
1366	9496209	0
1367	9496213	0
1368	9496260	0
1369	9496284	0
1370	9496489	0
1371	9496593	0
1372	9498183	0
1373	9498273	0
1374	9498387	0
1375	9498587	0
1376	9498665	0
1377	9498680	0.0909090909090909
1378	9498726	0.0909090909090909
1379	9498764	0.181818181818182
1380	9498915	0.181818181818182
1381	9499084	0.181818181818182
1382	9499151	0.181818181818182
1383	9499210	0.181818181818182
1384	9499407	0.181818181818182
1385	9499490	0.181818181818182
1386	9499610	0.181818181818182
1387	9499889	0.181818181818182
1388	9499975	0.0909090909090909
1389	9500610	0.0909090909090909
1390	9500809	0
1391	9501246	0
1392	9501285	0
1393	9501415	0
1394	9501431	0
1395	9501440	0
1396	9501715	0
1397	9501902	0
1398	9502402	0
1399	9502449	0
1400	9503233	0
1401	9503303	0
1402	9503721	0
1403	9503885	0
1404	9504296	0
1405	9504525	0
1406	9505005	0
1407	9505226	0
1408	9505395	0
1409	9505549	0
1410	9505860	0
1411	9506135	0
1412	9506136	0
1413	9506513	0.0909090909090909
1414	9506791	0.0909090909090909
1415	9507084	0.181818181818182
1416	9507340	0.181818181818182
1417	9508167	0.181818181818182
1418	9508173	0.181818181818182
1419	9508449	0.181818181818182
1420	9508663	0.181818181818182
1421	9508770	0.181818181818182
1422	9509126	0.181818181818182
1423	9509282	0.181818181818182
1424	9509465	0.0909090909090909
1425	9509494	0.0909090909090909
1426	9510303	0
1427	9510340	0
1428	9510675	0
1429	9511120	0
1430	9511125	0
1431	9511342	0
1432	9511791	0
1433	9512450	0
1434	9512527	0
1435	9512624	0
1436	9512645	0
1437	9513488	0
1438	9513529	0.0909090909090909
1439	9513642	0.0909090909090909
1440	9513673	0.0909090909090909
1441	9513850	0.0909090909090909
1442	9513900	0.0909090909090909
1443	9514092	0.0909090909090909
1444	9514247	0.0909090909090909
1445	9514276	0.0909090909090909
1446	9514391	0.0909090909090909
1447	9515554	0.0909090909090909
1448	9516333	0.0909090909090909
1449	9517458	0
1450	9517894	0
1451	9517899	0
1452	9517904	0
1453	9517909	0
1454	9517914	0
1455	9517928	0
1456	9518095	0
1457	9518139	0
1458	9518438	0
1459	9518562	0
1460	9518567	0.0909090909090909
1461	9518776	0.0909090909090909
1462	9518823	0.0909090909090909
1463	9518931	0.0909090909090909
1464	9518934	0.0909090909090909
1465	9520117	0.0909090909090909
1466	9520496	0.0909090909090909
1467	9520512	0.0909090909090909
1468	9520561	0.0909090909090909
1469	9520834	0.0909090909090909
1470	9520922	0.0909090909090909
1471	9520997	0
1472	9521353	0
1473	9521380	0
1474	9521388	0
1475	9522025	0
1476	9522046	0
1477	9522056	0.0909090909090909
1478	9522057	0.0909090909090909
1479	9522239	0.0909090909090909
1480	9522566	0.0909090909090909
1481	9522631	0.0909090909090909
1482	9522639	0.0909090909090909
1483	9522821	0.0909090909090909
1484	9523058	0.0909090909090909
1485	9523213	0.0909090909090909
1486	9524088	0.0909090909090909
1487	9524160	0.0909090909090909
1488	9524162	0
1489	9524196	0
1490	9525081	0.0909090909090909
1491	9525142	0.0909090909090909
1492	9525692	0.0909090909090909
1493	9525696	0.0909090909090909
1494	9526115	0.0909090909090909
1495	9526276	0.0909090909090909
1496	9526780	0.0909090909090909
1497	9527150	0.181818181818182
1498	9527488	0.181818181818182
1499	9527492	0.181818181818182
1500	9527499	0.181818181818182
1501	9527529	0.0909090909090909
1502	9527537	0.0909090909090909
1503	9527764	0.0909090909090909
1504	9528033	0.0909090909090909
1505	9528160	0.181818181818182
1506	9528182	0.181818181818182
1507	9528207	0.181818181818182
1508	9528208	0.0909090909090909
1509	9528209	0.0909090909090909
1510	9528216	0.0909090909090909
1511	9528253	0.0909090909090909
1512	9528902	0.0909090909090909
1513	9529067	0.0909090909090909
1514	9529360	0.0909090909090909
1515	9529491	0.0909090909090909
1516	9529511	0
1517	9529577	0
1518	9529688	0
1519	9529766	0
1520	9529773	0
1521	9530088	0
1522	9531740	0
1523	9532276	0.0909090909090909
1524	9533095	0.0909090909090909
1525	9533300	0.0909090909090909
1526	9533491	0.0909090909090909
1527	9533685	0.0909090909090909
1528	9533715	0.0909090909090909
1529	9533792	0.0909090909090909
1530	9533874	0.0909090909090909
1531	9534245	0.0909090909090909
1532	9534425	0.0909090909090909
1533	9534450	0.0909090909090909
1534	9534493	0
1535	9534662	0
1536	9534670	0
1537	9534691	0
1538	9534741	0
1539	9534747	0.0909090909090909
1540	9535206	0.0909090909090909
1541	9535650	0.0909090909090909
1542	9535696	0.0909090909090909
1543	9535967	0.0909090909090909
1544	9536027	0.0909090909090909
1545	9536028	0.0909090909090909
1546	9536056	0.181818181818182
1547	9536195	0.272727272727273
1548	9536362	0.272727272727273
1549	9536624	0.272727272727273
1550	9537154	0.181818181818182
1551	9537172	0.181818181818182
1552	9537354	0.272727272727273
1553	9537511	0.272727272727273
1554	9537555	0.363636363636364
1555	9537556	0.363636363636364
1556	9537565	0.363636363636364
1557	9537697	0.272727272727273
1558	9537699	0.181818181818182
1559	9537780	0.181818181818182
1560	9538134	0.181818181818182
1561	9538161	0.181818181818182
1562	9538230	0.181818181818182
1563	9538320	0.0909090909090909
1564	9538380	0.0909090909090909
1565	9538530	0
1566	9538894	0.0909090909090909
1567	9539003	0.0909090909090909
1568	9539029	0.0909090909090909
1569	9539131	0.0909090909090909
1570	9539496	0.0909090909090909
1571	9539650	0.0909090909090909
1572	9539693	0.181818181818182
1573	9539856	0.181818181818182
1574	9539946	0.272727272727273
1575	9540151	0.272727272727273
1576	9540383	0.272727272727273
1577	9540981	0.181818181818182
1578	9542285	0.272727272727273
1579	9542524	0.272727272727273
1580	9542826	0.272727272727273
1581	9543002	0.272727272727273
1582	9543081	0.272727272727273
1583	9543089	0.181818181818182
1584	9543110	0.181818181818182
1585	9543112	0.0909090909090909
1586	9543441	0.0909090909090909
1587	9543447	0.0909090909090909
1588	9543483	0.0909090909090909
1589	9543487	0
1590	9543735	0.0909090909090909
1591	9543860	0.0909090909090909
1592	9544056	0.0909090909090909
1593	9544375	0.0909090909090909
1594	9544725	0.0909090909090909
1595	9544848	0.0909090909090909
1596	9545657	0.181818181818182
1597	9545740	0.181818181818182
1598	9546080	0.181818181818182
1599	9546249	0.272727272727273
1600	9546401	0.272727272727273
1601	9547729	0.181818181818182
1602	9547754	0.181818181818182
1603	9547967	0.272727272727273
1604	9548836	0.272727272727273
1605	9548879	0.272727272727273
1606	9548927	0.272727272727273
1607	9549186	0.181818181818182
1608	9549260	0.181818181818182
1609	9549466	0.181818181818182
1610	9549533	0.0909090909090909
1611	9549617	0.0909090909090909
1612	9550879	0.0909090909090909
1613	9550955	0.181818181818182
1614	9551321	0.181818181818182
1615	9551324	0.181818181818182
1616	9551336	0.181818181818182
1617	9551751	0.181818181818182
1618	9552058	0.181818181818182
1619	9552210	0.181818181818182
1620	9552368	0.272727272727273
1621	9552896	0.363636363636364
1622	9552963	0.363636363636364
1623	9553043	0.454545454545455
1624	9553084	0.363636363636364
1625	9553085	0.272727272727273
1626	9553087	0.363636363636364
1627	9553185	0.363636363636364
1628	9553297	0.363636363636364
1629	9553608	0.363636363636364
1630	9553743	0.454545454545455
1631	9554716	0.363636363636364
1632	9555719	0.272727272727273
1633	9556220	0.272727272727273
1634	9556926	0.272727272727273
1635	9557108	0.363636363636364
1636	9557190	0.363636363636364
1637	9557298	0.272727272727273
1638	9557305	0.272727272727273
1639	9557451	0.272727272727273
1640	9558305	0.272727272727273
1641	9558311	0.272727272727273
1642	9558838	0.272727272727273
1643	9559014	0.272727272727273
1644	9559483	0.272727272727273
1645	9559536	0.181818181818182
1646	9559552	0.0909090909090909
1647	9560695	0.0909090909090909
1648	9560734	0.0909090909090909
1649	9561005	0.0909090909090909
1650	9561271	0.0909090909090909
1651	9561290	0.0909090909090909
1652	9561550	0
1653	9561952	0
1654	9561991	0
1655	9561992	0
1656	9562048	0.0909090909090909
1657	9562139	0.0909090909090909
1658	9562141	0.181818181818182
1659	9562226	0.272727272727273
1660	9562307	0.272727272727273
1661	9562854	0.363636363636364
1662	9562963	0.454545454545455
1663	9563089	0.454545454545455
1664	9563094	0.454545454545455
1665	9563687	0.454545454545455
1666	9563689	0.454545454545455
1667	9563728	0.363636363636364
1668	9563806	0.363636363636364
1669	9563872	0.272727272727273
1670	9563966	0.181818181818182
1671	9564087	0.181818181818182
1672	9564157	0.0909090909090909
1673	9564232	0
1674	9564455	0
1675	9564517	0
1676	9564662	0
1677	9564839	0
1678	9564860	0.0909090909090909
1679	9564863	0.0909090909090909
1680	9564880	0.0909090909090909
1681	9564988	0.0909090909090909
1682	9565137	0.0909090909090909
1683	9565255	0.0909090909090909
1684	9565492	0.0909090909090909
1685	9565976	0.181818181818182
1686	9566010	0.181818181818182
1687	9566172	0.181818181818182
1688	9566326	0.181818181818182
1689	9566408	0.0909090909090909
1690	9566466	0.0909090909090909
1691	9566635	0.0909090909090909
1692	9566638	0.0909090909090909
1693	9566641	0.0909090909090909
1694	9566845	0.0909090909090909
1695	9566980	0.0909090909090909
1696	9567018	0
1697	9567089	0
1698	9567242	0
1699	9567334	0
1700	9567374	0
1701	9567491	0
1702	9567567	0
1703	9567838	0
1704	9568410	0
1705	9568453	0
1706	9568758	0
1707	9568823	0
1708	9568867	0.0909090909090909
1709	9568868	0.0909090909090909
1710	9568876	0.0909090909090909
1711	9568938	0.0909090909090909
1712	9569039	0.0909090909090909
1713	9569139	0.0909090909090909
1714	9569192	0.0909090909090909
1715	9569449	0.0909090909090909
1716	9569456	0.181818181818182
1717	9569549	0.181818181818182
1718	9569567	0.181818181818182
1719	9569730	0.0909090909090909
1720	9569792	0.0909090909090909
1721	9569865	0.0909090909090909
1722	9569873	0.0909090909090909
1723	9569932	0.0909090909090909
1724	9569936	0.0909090909090909
1725	9570043	0.0909090909090909
1726	9570739	0.0909090909090909
1727	9570895	0
1728	9571027	0
1729	9571090	0
1730	9571210	0
1731	9571231	0
1732	9571414	0
1733	9571507	0
1734	9571879	0
1735	9572284	0
1736	9572372	0
1737	9574033	0
1738	9574255	0
1739	9574382	0
1740	9574497	0
1741	9574508	0
1742	9574595	0
1743	9574685	0.0909090909090909
1744	9574911	0.0909090909090909
1745	9575111	0.0909090909090909
1746	9575539	0.0909090909090909
1747	9575563	0.0909090909090909
1748	9575754	0.0909090909090909
1749	9575783	0.0909090909090909
1750	9576019	0.0909090909090909
1751	9576029	0.0909090909090909
1752	9576357	0.0909090909090909
1753	9576358	0.181818181818182
1754	9576589	0.181818181818182
1755	9576677	0.181818181818182
1756	9577179	0.181818181818182
1757	9577329	0.181818181818182
1758	9577593	0.181818181818182
1759	9577819	0.181818181818182
1760	9577997	0.181818181818182
1761	9578021	0.181818181818182
1762	9578022	0.181818181818182
1763	9578024	0.181818181818182
1764	9578050	0.0909090909090909
1765	9578247	0
1766	9578336	0
1767	9578932	0.0909090909090909
1768	9579011	0.0909090909090909
1769	9579015	0.0909090909090909
1770	9579016	0.0909090909090909
1771	9579207	0.0909090909090909
1772	9579410	0.0909090909090909
1773	9579440	0.0909090909090909
1774	9579871	0.0909090909090909
1775	9580107	0.0909090909090909
1776	9580128	0.0909090909090909
1777	9580216	0.0909090909090909
1778	9580396	0.0909090909090909
1779	9580457	0.0909090909090909
1780	9580922	0.0909090909090909
1781	9580931	0.181818181818182
1782	9581200	0.181818181818182
1783	9581214	0.181818181818182
1784	9581215	0.181818181818182
1785	9581374	0.181818181818182
1786	9581495	0.181818181818182
1787	9581533	0.181818181818182
1788	9581568	0.181818181818182
1789	9581640	0.0909090909090909
1790	9581651	0.0909090909090909
1791	9581821	0.0909090909090909
1792	9581918	0
1793	9582135	0
1794	9582608	0
1795	9582966	0
1796	9582975	0
1797	9582976	0
1798	9582986	0
1799	9583014	0.0909090909090909
1800	9583915	0.0909090909090909
1801	9584159	0.0909090909090909
1802	9584161	0.0909090909090909
1803	9584202	0.0909090909090909
1804	9584260	0.0909090909090909
1805	9584262	0.0909090909090909
1806	9585083	0.181818181818182
1807	9585095	0.181818181818182
1808	9585230	0.181818181818182
1809	9585360	0.181818181818182
1810	9586291	0.0909090909090909
1811	9586670	0.0909090909090909
1812	9587213	0.0909090909090909
1813	9587279	0.0909090909090909
1814	9587607	0.0909090909090909
1815	9587634	0.0909090909090909
1816	9587706	0.0909090909090909
1817	9588002	0
1818	9588003	0
1819	9589333	0
1820	9590225	0
1821	9590592	0
1822	9590966	0
1823	9591226	0
1824	9591411	0
1825	9591551	0
1826	9591697	0
1827	9591720	0
1828	9591912	0
1829	9591913	0
1830	9592007	0
1831	9592121	0.0909090909090909
1832	9592682	0.0909090909090909
1833	9593230	0.0909090909090909
1834	9593310	0.181818181818182
1835	9593919	0.181818181818182
1836	9593973	0.181818181818182
1837	9594038	0.181818181818182
1838	9595125	0.272727272727273
1839	9595450	0.272727272727273
1840	9595656	0.272727272727273
1841	9596638	0.272727272727273
1842	9596694	0.272727272727273
1843	9597063	0.272727272727273
1844	9599398	0.272727272727273
1845	9599515	0.181818181818182
1846	9599719	0.181818181818182
1847	9599929	0.181818181818182
1848	9599962	0.272727272727273
1849	9600142	0.181818181818182
1850	9600972	0.181818181818182
1851	9601336	0.181818181818182
1852	9601346	0.181818181818182
1853	9601688	0.0909090909090909
1854	9601819	0.0909090909090909
1855	9602071	0.0909090909090909
1856	9602515	0.0909090909090909
1857	9602556	0.0909090909090909
1858	9602709	0.0909090909090909
1859	9602781	0
1860	9603071	0
1861	9603595	0
1862	9603705	0
1863	9603737	0
1864	9603866	0
1865	9604113	0
1866	9604502	0
1867	9604526	0
1868	9604595	0.0909090909090909
1869	9604900	0.181818181818182
1870	9604964	0.181818181818182
1871	9605189	0.181818181818182
1872	9605274	0.181818181818182
1873	9605900	0.181818181818182
1874	9606015	0.181818181818182
1875	9606378	0.181818181818182
1876	9607071	0.181818181818182
1877	9607195	0.181818181818182
1878	9607695	0.181818181818182
1879	9608901	0.0909090909090909
1880	9609333	0
1881	9609384	0
1882	9609453	0
1883	9609874	0
1884	9609894	0
1885	9609925	0
1886	9610424	0
1887	9610717	0
1888	9610718	0
1889	9610948	0
1890	9611116	0
1891	9612034	0
1892	9612691	0
1893	9612988	0
1894	9613566	0
1895	9614922	0
1896	9615103	0
1897	9615195	0
1898	9615206	0
1899	9615427	0
1900	9615564	0
1901	9616775	0
1902	9616846	0
1903	9616922	0
1904	9616934	0
1905	9617161	0
1906	9617887	0
1907	9618073	0
1908	9619536	0.0909090909090909
1909	9620179	0.181818181818182
1910	9620202	0.181818181818182
1911	9620729	0.272727272727273
1912	9620950	0.272727272727273
1913	9621608	0.272727272727273
1914	9622738	0.272727272727273
1915	9623784	0.272727272727273
1916	9623870	0.363636363636364
1917	9624327	0.454545454545455
1918	9624715	0.545454545454545
1919	9625347	0.454545454545455
1920	9625621	0.363636363636364
1921	9626145	0.363636363636364
1922	9626211	0.272727272727273
1923	9627016	0.272727272727273
1924	9627355	0.272727272727273
1925	9628345	0.363636363636364
1926	9629034	0.363636363636364
1927	9630247	0.272727272727273
1928	9630576	0.272727272727273
1929	9630904	0.181818181818182
1930	9630930	0.181818181818182
1931	9630936	0.181818181818182
1932	9631549	0.181818181818182
1933	9632064	0.272727272727273
1934	9632137	0.363636363636364
1935	9632654	0.363636363636364
1936	9632733	0.272727272727273
1937	9632756	0.272727272727273
1938	9632783	0.272727272727273
1939	9632961	0.181818181818182
1940	9633726	0.181818181818182
1941	9633821	0.181818181818182
1942	9634589	0.272727272727273
1943	9634607	0.363636363636364
1944	9634619	0.363636363636364
1945	9634690	0.272727272727273
1946	9634767	0.272727272727273
1947	9635248	0.272727272727273
1948	9635437	0.363636363636364
1949	9635479	0.363636363636364
1950	9635722	0.363636363636364
1951	9637485	0.363636363636364
1952	9637689	0.363636363636364
1953	9638048	0.272727272727273
1954	9638178	0.181818181818182
1955	9638628	0.0909090909090909
1956	9638765	0.0909090909090909
1957	9638891	0.181818181818182
1958	9638897	0.181818181818182
1959	9638903	0.0909090909090909
1960	9638904	0.181818181818182
1961	9639007	0.181818181818182
1962	9639582	0.181818181818182
1963	9640520	0.181818181818182
1964	9640812	0.181818181818182
1965	9640917	0.181818181818182
1966	9641210	0.181818181818182
1967	9641320	0.181818181818182
1968	9641432	0.0909090909090909
1969	9641446	0.0909090909090909
1970	9641936	0.0909090909090909
1971	9642104	0
1972	9642174	0
1973	9643130	0
1974	9646093	0.0909090909090909
1975	9646782	0.0909090909090909
1976	9647574	0.181818181818182
1977	9647680	0.272727272727273
1978	9647845	0.272727272727273
1979	9648320	0.272727272727273
1980	9648412	0.272727272727273
1981	9648490	0.272727272727273
1982	9648986	0.272727272727273
1983	9649214	0.363636363636364
1984	9649446	0.363636363636364
1985	9649505	0.272727272727273
1986	9650323	0.272727272727273
1987	9650634	0.181818181818182
1988	9650639	0.0909090909090909
1989	9651038	0.0909090909090909
1990	9651083	0.0909090909090909
1991	9651369	0.0909090909090909
1992	9651668	0.0909090909090909
1993	9651680	0.0909090909090909
1994	9652019	0
1995	9652056	0
1996	9652957	0
1997	9653028	0
1998	9653703	0
[truncated: 10,995 more rows]
