# Supplementary material for: Genome-Wide Analyses Suggest Mechanisms Involving Early B-Cell Development in Canine IgA Deficiency
Source: PLoS One. 2015 Jul 30;10(7):e0133844. doi: 10.1371/journal.pone.0133844 (PMC4520476; doi:10.1371/journal.pone.0133844)
Supplement: S7 Table — (XLSX) [file pone.0133844.s017.xlsx]

## Sheet: LR_11SNPwindow.txt (3)
Table S7. Fixation using 11 variants per windows (1 variant overlap) in 20 Labradors across CFA28: 9000091-11999424
no	position	prop fixed
1	9000789	0.0909090909090909
2	9000939	0
3	9001032	0
4	9001109	0
5	9001229	0
6	9001674	0
7	9001787	0
8	9001833	0
9	9001982	0
10	9002236	0
11	9002267	0
12	9002509	0
13	9002784	0
14	9002831	0
15	9003437	0
16	9003632	0
17	9003633	0
18	9003904	0
19	9004320	0
20	9004520	0
21	9004564	0
22	9004919	0
23	9005309	0
24	9005338	0
25	9005502	0
26	9005638	0
27	9005688	0
28	9006019	0
29	9006568	0
30	9007042	0
31	9007529	0
32	9008103	0
33	9008419	0
34	9008506	0
35	9008594	0
36	9008801	0
37	9008900	0
38	9009257	0
39	9009318	0
40	9009369	0
41	9009943	0
42	9010058	0
43	9010471	0
44	9011133	0
45	9011297	0
46	9011572	0
47	9011586	0
48	9012020	0
49	9012155	0
50	9012207	0
51	9012229	0
52	9012232	0
53	9012244	0
54	9012364	0
55	9012499	0
56	9012965	0
57	9013095	0
58	9013098	0
59	9013127	0
60	9013382	0
61	9013443	0
62	9013453	0
63	9013626	0
64	9013745	0
65	9013848	0
66	9013894	0
67	9013951	0
68	9014048	0
69	9014089	0
70	9014093	0
71	9014112	0
72	9014138	0
73	9014282	0
74	9014788	0
75	9014789	0
76	9014793	0
77	9014795	0
78	9014797	0
79	9014841	0
80	9014988	0
81	9015209	0.0909090909090909
82	9015491	0.0909090909090909
83	9015823	0.0909090909090909
84	9016088	0.0909090909090909
85	9016103	0.181818181818182
86	9016322	0.181818181818182
87	9016326	0.181818181818182
88	9016330	0.181818181818182
89	9016360	0.181818181818182
90	9016682	0.181818181818182
91	9016800	0.181818181818182
92	9016982	0.0909090909090909
93	9017130	0.0909090909090909
94	9017172	0.0909090909090909
95	9017284	0.0909090909090909
96	9017304	0
97	9017446	0
98	9017524	0
99	9017528	0
100	9017953	0.0909090909090909
101	9018548	0.0909090909090909
102	9018662	0.0909090909090909
103	9018674	0.0909090909090909
104	9018856	0.0909090909090909
105	9018860	0.0909090909090909
106	9018864	0.0909090909090909
107	9019603	0.181818181818182
108	9019751	0.181818181818182
109	9020694	0.181818181818182
110	9020794	0.181818181818182
111	9020798	0.0909090909090909
112	9021002	0.0909090909090909
113	9022289	0.0909090909090909
114	9022290	0.0909090909090909
115	9022351	0.0909090909090909
116	9022352	0.0909090909090909
117	9022420	0.0909090909090909
118	9022668	0
119	9022984	0
120	9023016	0
121	9023157	0
122	9023159	0
123	9023202	0
124	9023408	0
125	9023450	0
126	9023552	0
127	9024684	0
128	9024720	0
129	9024730	0
130	9024778	0
131	9025290	0
132	9025339	0
133	9025345	0
134	9025361	0
135	9025362	0
136	9025730	0
137	9025731	0
138	9025899	0
139	9026013	0
140	9026014	0
141	9026018	0
142	9026023	0
143	9026048	0
144	9026069	0
145	9026275	0
146	9026405	0
147	9026635	0
148	9026679	0
149	9026960	0
150	9027069	0
151	9028226	0
152	9028471	0
153	9029031	0
154	9029032	0
155	9029064	0
156	9029759	0
157	9029808	0
158	9029810	0
159	9029956	0
160	9030144	0
161	9030185	0.0909090909090909
162	9030186	0.0909090909090909
163	9030657	0.0909090909090909
164	9030699	0.181818181818182
165	9031234	0.181818181818182
166	9031701	0.181818181818182
167	9031738	0.181818181818182
168	9031741	0.181818181818182
169	9032465	0.181818181818182
170	9033585	0.181818181818182
171	9033586	0.181818181818182
172	9033837	0.0909090909090909
173	9034448	0.0909090909090909
174	9035127	0.181818181818182
175	9035331	0.0909090909090909
176	9036932	0.0909090909090909
177	9037083	0.0909090909090909
178	9037089	0.0909090909090909
179	9037329	0.181818181818182
180	9037585	0.181818181818182
181	9037594	0.181818181818182
182	9037846	0.181818181818182
183	9038349	0.272727272727273
184	9038962	0.363636363636364
185	9039044	0.272727272727273
186	9039059	0.363636363636364
187	9039125	0.454545454545455
188	9039672	0.545454545454545
189	9039766	0.636363636363636
190	9040250	0.636363636363636
191	9040258	0.727272727272727
192	9040648	0.818181818181818
193	9040777	0.909090909090909
194	9040794	0.909090909090909
195	9040979	0.909090909090909
196	9040991	1
197	9041256	1
198	9041508	1
199	9041559	1
200	9041584	1
201	9042088	1
202	9042090	1
203	9042656	1
204	9042713	1
205	9043052	1
206	9046466	1
207	9046907	1
208	9047244	1
209	9047405	1
210	9047791	1
211	9048050	0.909090909090909
212	9048208	0.909090909090909
213	9048224	0.909090909090909
214	9048896	0.909090909090909
215	9049363	0.909090909090909
216	9049366	0.909090909090909
217	9049429	0.909090909090909
218	9050173	0.909090909090909
219	9050240	0.909090909090909
220	9051784	0.818181818181818
221	9051823	0.818181818181818
222	9051826	0.818181818181818
223	9052674	0.818181818181818
224	9052923	0.727272727272727
225	9052947	0.636363636363636
226	9053125	0.636363636363636
227	9053140	0.636363636363636
228	9053532	0.636363636363636
229	9055264	0.636363636363636
230	9056134	0.636363636363636
231	9056143	0.727272727272727
232	9056457	0.636363636363636
233	9057481	0.636363636363636
234	9058292	0.636363636363636
235	9059203	0.727272727272727
236	9059843	0.818181818181818
237	9060075	0.818181818181818
238	9060852	0.818181818181818
239	9061609	0.727272727272727
240	9061679	0.636363636363636
241	9061900	0.545454545454545
242	9062033	0.454545454545455
243	9062147	0.545454545454545
244	9062361	0.636363636363636
245	9063282	0.636363636363636
246	9063400	0.545454545454545
247	9064386	0.454545454545455
248	9064472	0.454545454545455
249	9064477	0.454545454545455
250	9064668	0.454545454545455
251	9065709	0.545454545454545
252	9066664	0.636363636363636
253	9066770	0.727272727272727
254	9067055	0.636363636363636
255	9068116	0.636363636363636
256	9068122	0.636363636363636
257	9068140	0.727272727272727
258	9068147	0.818181818181818
259	9068158	0.818181818181818
260	9068456	0.727272727272727
261	9068849	0.818181818181818
262	9068872	0.818181818181818
263	9069173	0.727272727272727
264	9069266	0.727272727272727
265	9069399	0.818181818181818
266	9069746	0.818181818181818
267	9070332	0.818181818181818
268	9071571	0.727272727272727
269	9071574	0.636363636363636
270	9071694	0.636363636363636
271	9071730	0.727272727272727
272	9072256	0.636363636363636
273	9073177	0.545454545454545
274	9073184	0.545454545454545
275	9073654	0.454545454545455
276	9073869	0.363636363636364
277	9073993	0.272727272727273
278	9073995	0.181818181818182
279	9074033	0.181818181818182
280	9074037	0.181818181818182
281	9074750	0.0909090909090909
282	9075130	0
283	9075511	0
284	9075676	0
285	9075684	0
286	9076002	0
287	9076092	0
288	9076158	0
289	9076182	0
290	9076673	0
291	9076764	0
292	9076812	0
293	9076821	0
294	9076835	0
295	9076846	0
296	9076857	0
297	9076902	0
298	9076908	0
299	9076958	0
300	9077225	0
301	9077262	0
302	9077365	0
303	9077504	0
304	9077715	0
305	9077725	0
306	9078016	0
307	9078201	0
308	9078207	0
309	9078254	0
310	9078267	0
311	9078294	0
312	9078307	0
313	9078314	0
314	9078760	0
315	9079172	0
316	9079178	0
317	9079196	0
318	9079218	0.0909090909090909
319	9079312	0.181818181818182
320	9079313	0.272727272727273
321	9079508	0.272727272727273
322	9079509	0.272727272727273
323	9079784	0.272727272727273
324	9080212	0.363636363636364
325	9080216	0.363636363636364
326	9080219	0.363636363636364
327	9080220	0.363636363636364
328	9080303	0.363636363636364
329	9080344	0.272727272727273
330	9080453	0.181818181818182
331	9080484	0.0909090909090909
332	9080539	0.0909090909090909
333	9081156	0.0909090909090909
334	9081540	0.0909090909090909
335	9081732	0
336	9082462	0
337	9082581	0
338	9082712	0
339	9082716	0
340	9082732	0
341	9082740	0
342	9083013	0
343	9083057	0
344	9083137	0
345	9083675	0
346	9084375	0
347	9084629	0
348	9084938	0
349	9085196	0
350	9085578	0.0909090909090909
351	9085618	0.0909090909090909
352	9086088	0.0909090909090909
353	9086258	0.0909090909090909
354	9086297	0.0909090909090909
355	9086512	0.0909090909090909
356	9086603	0.0909090909090909
357	9086707	0.0909090909090909
358	9086913	0.0909090909090909
359	9087018	0.0909090909090909
360	9087957	0.0909090909090909
361	9088172	0
362	9088444	0
363	9088609	0
364	9088684	0
365	9088799	0
366	9088927	0
367	9089022	0
368	9089105	0
369	9089203	0
370	9089232	0
371	9089415	0
372	9090136	0
373	9090764	0
374	9090988	0
375	9091191	0
376	9091307	0
377	9091652	0
378	9091771	0
379	9091923	0
380	9092080	0
381	9092223	0
382	9092909	0
383	9093041	0
384	9093112	0
385	9093187	0
386	9093590	0
387	9093627	0
388	9093630	0
389	9093633	0
390	9093635	0
391	9093641	0
392	9094162	0.0909090909090909
393	9094920	0.0909090909090909
394	9095328	0.0909090909090909
395	9095562	0.181818181818182
396	9095605	0.181818181818182
397	9095719	0.272727272727273
398	9095822	0.272727272727273
399	9096051	0.272727272727273
400	9096278	0.272727272727273
401	9096366	0.272727272727273
402	9096449	0.272727272727273
403	9096503	0.181818181818182
404	9096636	0.181818181818182
405	9097105	0.181818181818182
406	9097982	0.0909090909090909
407	9098466	0.0909090909090909
408	9098761	0
409	9099002	0
410	9099249	0.0909090909090909
411	9099266	0.0909090909090909
412	9099550	0.0909090909090909
413	9099640	0.0909090909090909
414	9100002	0.0909090909090909
415	9100006	0.0909090909090909
416	9100067	0.0909090909090909
417	9100103	0.0909090909090909
418	9100185	0.0909090909090909
419	9100333	0.0909090909090909
420	9100450	0.0909090909090909
421	9100716	0
422	9100869	0
423	9101114	0
424	9101296	0
425	9102150	0
426	9102269	0
427	9102282	0
428	9102285	0
429	9102675	0.0909090909090909
430	9103023	0.0909090909090909
431	9103084	0.0909090909090909
432	9103085	0.0909090909090909
433	9103207	0.0909090909090909
434	9103230	0.0909090909090909
435	9103393	0.0909090909090909
436	9103559	0.0909090909090909
437	9104029	0.0909090909090909
438	9104106	0.0909090909090909
439	9104152	0.0909090909090909
440	9104461	0
441	9104565	0
442	9104842	0
443	9104935	0
444	9105010	0.0909090909090909
445	9105019	0.0909090909090909
446	9105026	0.0909090909090909
447	9105332	0.0909090909090909
448	9105405	0.0909090909090909
449	9105780	0.0909090909090909
450	9106125	0.0909090909090909
451	9106133	0.0909090909090909
452	9106477	0.0909090909090909
453	9106924	0.0909090909090909
454	9107300	0.0909090909090909
455	9107320	0
456	9107462	0
457	9107744	0
458	9108048	0
459	9108085	0
460	9108126	0
461	9108519	0
462	9108535	0
463	9108685	0.0909090909090909
464	9108720	0.0909090909090909
465	9108873	0.0909090909090909
466	9108950	0.0909090909090909
467	9108980	0.0909090909090909
468	9109317	0.0909090909090909
469	9109371	0.181818181818182
470	9109634	0.181818181818182
471	9109805	0.181818181818182
472	9110262	0.272727272727273
473	9110338	0.363636363636364
474	9110411	0.272727272727273
475	9110488	0.272727272727273
476	9110514	0.272727272727273
477	9110601	0.272727272727273
478	9110604	0.272727272727273
479	9110928	0.272727272727273
480	9111013	0.181818181818182
481	9111170	0.181818181818182
482	9111254	0.181818181818182
483	9111556	0.0909090909090909
484	9111695	0
485	9112237	0
486	9113042	0
487	9113206	0
488	9113447	0
489	9113448	0
490	9113458	0
491	9113486	0
492	9113601	0
493	9113608	0
494	9113777	0
495	9113925	0
496	9114091	0
497	9114192	0
498	9114394	0
499	9114401	0
500	9114999	0
501	9115428	0
502	9115456	0
503	9115654	0
504	9115933	0
505	9116460	0
506	9117028	0
507	9117210	0
508	9117252	0
509	9117980	0
510	9117981	0
511	9118004	0
512	9118072	0
513	9118145	0
514	9118226	0
515	9118408	0.0909090909090909
516	9118672	0.0909090909090909
517	9118674	0.0909090909090909
518	9118781	0.0909090909090909
519	9118803	0.0909090909090909
520	9119002	0.0909090909090909
521	9119203	0.0909090909090909
522	9119345	0.0909090909090909
523	9119362	0.0909090909090909
524	9119470	0.0909090909090909
525	9119870	0.0909090909090909
526	9120006	0
527	9120038	0
528	9120081	0
529	9120109	0
530	9120303	0
531	9120801	0
532	9121069	0
533	9121180	0
534	9121516	0
535	9122021	0
536	9122067	0
537	9122560	0
538	9122818	0
539	9122925	0
540	9123875	0
541	9123928	0.0909090909090909
542	9123957	0.0909090909090909
543	9124006	0.0909090909090909
544	9124042	0.0909090909090909
545	9124060	0.0909090909090909
546	9124061	0.0909090909090909
547	9124281	0.0909090909090909
548	9124572	0.0909090909090909
549	9124752	0.0909090909090909
550	9124828	0.0909090909090909
551	9124843	0.0909090909090909
552	9124899	0
553	9124901	0
554	9124972	0.0909090909090909
555	9124982	0.0909090909090909
556	9125096	0.0909090909090909
557	9126738	0.0909090909090909
558	9127083	0.0909090909090909
559	9127129	0.0909090909090909
560	9127181	0.0909090909090909
561	9127226	0.0909090909090909
562	9127250	0.0909090909090909
563	9127363	0.0909090909090909
564	9127803	0.0909090909090909
565	9127952	0
566	9128086	0
567	9128585	0
568	9128938	0
569	9129276	0
570	9129297	0
571	9129460	0
572	9129912	0
573	9129963	0
574	9129964	0
575	9130261	0
576	9130795	0
577	9130813	0
578	9130936	0
579	9130939	0
580	9131645	0
581	9132326	0
582	9132540	0
583	9134968	0.0909090909090909
584	9135012	0.0909090909090909
585	9135153	0.0909090909090909
586	9135492	0.0909090909090909
587	9135625	0.0909090909090909
588	9136723	0.0909090909090909
589	9136768	0.0909090909090909
590	9136846	0.0909090909090909
591	9136848	0.181818181818182
592	9136969	0.181818181818182
593	9137075	0.181818181818182
594	9137096	0.0909090909090909
595	9137144	0.0909090909090909
596	9137614	0.0909090909090909
597	9138170	0.0909090909090909
598	9138203	0.181818181818182
599	9138235	0.272727272727273
600	9139044	0.272727272727273
601	9139062	0.272727272727273
602	9139324	0.272727272727273
603	9139613	0.272727272727273
604	9139644	0.272727272727273
605	9139804	0.272727272727273
606	9139909	0.272727272727273
607	9140077	0.272727272727273
608	9140530	0.272727272727273
609	9140720	0.181818181818182
610	9140804	0.0909090909090909
611	9141197	0.0909090909090909
612	9141271	0.0909090909090909
613	9141396	0
614	9142392	0
615	9142600	0
616	9142635	0
617	9142668	0
618	9142680	0
619	9142841	0
620	9142881	0
621	9143006	0
622	9143377	0
623	9143426	0
624	9143525	0
625	9143900	0
626	9144440	0
627	9144446	0
628	9144686	0
629	9145028	0
630	9145032	0
631	9145038	0
632	9145148	0
633	9145161	0
634	9145164	0
635	9145226	0
636	9145643	0
637	9145790	0
638	9145810	0.0909090909090909
639	9145957	0.0909090909090909
640	9146538	0.0909090909090909
641	9146594	0.0909090909090909
642	9146977	0.0909090909090909
643	9147023	0.0909090909090909
644	9147135	0.0909090909090909
645	9147162	0.181818181818182
646	9147164	0.181818181818182
647	9147406	0.272727272727273
648	9149465	0.363636363636364
649	9150836	0.272727272727273
650	9153248	0.272727272727273
651	9157090	0.272727272727273
652	9157133	0.272727272727273
653	9158152	0.272727272727273
654	9158201	0.272727272727273
655	9158997	0.363636363636364
656	9159272	0.363636363636364
657	9160165	0.454545454545455
658	9160327	0.363636363636364
659	9160429	0.272727272727273
660	9160757	0.272727272727273
661	9161374	0.363636363636364
662	9161866	0.454545454545455
663	9162302	0.454545454545455
664	9163197	0.454545454545455
665	9163247	0.454545454545455
666	9164020	0.363636363636364
667	9164559	0.272727272727273
668	9164798	0.272727272727273
669	9165080	0.272727272727273
670	9165804	0.272727272727273
671	9166894	0.363636363636364
672	9167364	0.272727272727273
673	9167454	0.181818181818182
674	9168441	0.181818181818182
675	9168549	0.181818181818182
676	9169426	0.181818181818182
677	9170031	0.272727272727273
678	9170724	0.363636363636364
679	9171159	0.272727272727273
680	9175560	0.363636363636364
681	9175795	0.454545454545455
682	9178631	0.454545454545455
683	9180681	0.454545454545455
684	9180806	0.454545454545455
685	9180948	0.454545454545455
686	9181107	0.454545454545455
687	9181265	0.454545454545455
688	9184306	0.454545454545455
689	9187030	0.454545454545455
690	9187804	0.545454545454545
691	9188964	0.545454545454545
692	9190252	0.545454545454545
693	9190810	0.545454545454545
694	9191746	0.545454545454545
695	9194302	0.545454545454545
696	9195381	0.545454545454545
697	9195814	0.545454545454545
698	9197247	0.545454545454545
699	9200444	0.454545454545455
700	9200919	0.363636363636364
701	9202338	0.272727272727273
702	9202393	0.272727272727273
703	9203008	0.272727272727273
704	9203378	0.272727272727273
705	9204202	0.272727272727273
706	9205805	0.363636363636364
707	9205814	0.454545454545455
708	9208416	0.545454545454545
709	9208559	0.636363636363636
710	9208833	0.636363636363636
711	9210336	0.636363636363636
712	9211793	0.727272727272727
713	9214201	0.636363636363636
714	9218725	0.545454545454545
715	9220104	0.454545454545455
716	9221330	0.545454545454545
717	9222795	0.454545454545455
718	9224068	0.363636363636364
719	9224369	0.363636363636364
720	9225820	0.363636363636364
721	9225982	0.363636363636364
722	9226256	0.454545454545455
723	9226379	0.363636363636364
724	9226462	0.454545454545455
725	9229209	0.454545454545455
726	9231342	0.454545454545455
727	9234080	0.363636363636364
728	9235371	0.454545454545455
729	9235627	0.545454545454545
730	9236536	0.545454545454545
731	9241046	0.454545454545455
732	9241915	0.454545454545455
733	9242810	0.363636363636364
734	9245246	0.363636363636364
735	9245562	0.272727272727273
736	9245594	0.272727272727273
737	9245609	0.272727272727273
738	9246068	0.363636363636364
739	9249971	0.272727272727273
740	9252355	0.272727272727273
741	9255857	0.272727272727273
742	9256832	0.363636363636364
743	9258279	0.363636363636364
744	9260451	0.454545454545455
745	9262984	0.454545454545455
746	9263081	0.454545454545455
747	9263695	0.454545454545455
748	9266238	0.454545454545455
749	9266559	0.363636363636364
750	9268562	0.454545454545455
751	9270413	0.363636363636364
752	9270532	0.363636363636364
753	9271166	0.272727272727273
754	9274164	0.272727272727273
755	9274623	0.181818181818182
756	9274782	0.272727272727273
757	9276305	0.272727272727273
758	9279792	0.363636363636364
759	9279868	0.454545454545455
760	9279890	0.545454545454545
761	9282265	0.545454545454545
762	9286422	0.636363636363636
763	9289479	0.636363636363636
764	9289501	0.727272727272727
765	9289508	0.818181818181818
766	9289522	0.909090909090909
767	9289527	0.909090909090909
768	9289532	1
769	9289540	1
770	9289550	1
771	9289551	1
772	9289563	1
773	9289582	1
774	9289586	1
775	9289594	1
776	9289602	0.909090909090909
777	9289611	0.818181818181818
778	9289613	0.818181818181818
779	9289628	0.727272727272727
780	9289678	0.727272727272727
781	9289765	0.636363636363636
782	9291028	0.545454545454545
783	9292480	0.454545454545455
784	9292702	0.454545454545455
785	9293543	0.363636363636364
786	9294590	0.272727272727273
787	9295280	0.272727272727273
788	9296459	0.272727272727273
789	9297124	0.272727272727273
790	9297705	0.363636363636364
791	9297733	0.272727272727273
792	9297746	0.363636363636364
793	9299280	0.363636363636364
794	9302028	0.363636363636364
795	9303306	0.363636363636364
796	9307062	0.363636363636364
797	9307815	0.454545454545455
798	9310023	0.454545454545455
799	9310572	0.454545454545455
800	9313118	0.454545454545455
801	9313791	0.363636363636364
802	9314189	0.454545454545455
803	9314438	0.454545454545455
804	9315188	0.545454545454545
805	9315208	0.636363636363636
806	9318528	0.636363636363636
807	9320292	0.727272727272727
808	9320305	0.636363636363636
809	9320833	0.727272727272727
810	9322001	0.727272727272727
811	9323951	0.636363636363636
812	9325691	0.636363636363636
813	9326224	0.636363636363636
814	9330049	0.545454545454545
815	9330093	0.545454545454545
816	9338162	0.545454545454545
817	9338671	0.454545454545455
818	9339342	0.454545454545455
819	9340687	0.454545454545455
820	9342346	0.363636363636364
821	9342381	0.454545454545455
822	9344449	0.545454545454545
823	9346223	0.545454545454545
824	9346437	0.454545454545455
825	9347895	0.454545454545455
826	9349792	0.363636363636364
827	9350405	0.272727272727273
828	9351340	0.272727272727273
829	9352037	0.272727272727273
830	9355014	0.363636363636364
831	9356156	0.454545454545455
832	9356483	0.363636363636364
833	9357139	0.272727272727273
834	9357371	0.363636363636364
835	9357778	0.454545454545455
836	9359170	0.454545454545455
837	9359227	0.454545454545455
838	9359764	0.545454545454545
839	9360813	0.636363636363636
840	9361289	0.545454545454545
841	9361760	0.454545454545455
842	9361762	0.454545454545455
843	9362169	0.454545454545455
844	9363389	0.454545454545455
845	9363703	0.454545454545455
846	9363721	0.454545454545455
847	9363727	0.545454545454545
848	9363729	0.636363636363636
849	9364175	0.636363636363636
850	9364724	0.545454545454545
851	9365482	0.545454545454545
852	9365955	0.545454545454545
853	9366573	0.454545454545455
854	9367828	0.454545454545455
855	9367875	0.454545454545455
856	9367881	0.363636363636364
857	9368763	0.272727272727273
858	9370512	0.181818181818182
859	9371129	0.181818181818182
860	9371139	0.181818181818182
861	9371311	0.181818181818182
862	9371383	0.181818181818182
863	9371461	0.272727272727273
864	9372170	0.272727272727273
865	9372185	0.363636363636364
866	9372781	0.454545454545455
867	9374018	0.545454545454545
868	9374197	0.545454545454545
869	9374225	0.545454545454545
870	9374408	0.454545454545455
871	9375292	0.454545454545455
872	9375559	0.454545454545455
873	9376063	0.454545454545455
874	9376620	0.363636363636364
875	9376724	0.363636363636364
876	9377246	0.272727272727273
877	9377362	0.181818181818182
878	9377406	0.0909090909090909
879	9378066	0.0909090909090909
880	9378352	0.0909090909090909
881	9379155	0.0909090909090909
882	9379714	0
883	9379904	0
884	9379915	0
885	9381902	0
886	9382377	0
887	9382570	0
888	9382869	0
889	9383106	0
890	9383420	0
891	9383516	0
892	9383681	0
893	9384144	0
894	9384153	0
895	9384469	0
896	9384854	0
897	9384896	0
898	9385165	0
899	9385324	0
900	9385492	0
901	9385817	0
902	9385948	0
903	9386281	0
904	9386287	0
905	9387287	0
906	9387331	0
907	9387708	0
908	9387720	0
909	9387722	0
910	9388020	0
911	9388110	0
912	9388356	0
913	9388423	0.0909090909090909
914	9388498	0.0909090909090909
915	9388688	0.0909090909090909
916	9388702	0.181818181818182
917	9388808	0.181818181818182
918	9388923	0.181818181818182
919	9389027	0.181818181818182
920	9389031	0.181818181818182
921	9389127	0.181818181818182
922	9389456	0.181818181818182
923	9389930	0.181818181818182
924	9390113	0.181818181818182
925	9390141	0.181818181818182
926	9390148	0.181818181818182
927	9390206	0.0909090909090909
928	9390620	0.181818181818182
929	9390863	0.181818181818182
930	9390877	0.181818181818182
931	9391347	0.181818181818182
932	9391436	0.181818181818182
933	9391460	0.181818181818182
934	9391949	0.181818181818182
935	9392036	0.0909090909090909
936	9392240	0.0909090909090909
937	9392571	0.0909090909090909
938	9392725	0.0909090909090909
939	9392832	0
940	9393098	0
941	9393371	0
942	9393865	0
943	9393906	0.0909090909090909
944	9394201	0.0909090909090909
945	9394334	0.0909090909090909
946	9394397	0.0909090909090909
947	9394399	0.0909090909090909
948	9394573	0.0909090909090909
949	9394893	0.0909090909090909
950	9394988	0.0909090909090909
951	9395160	0.0909090909090909
952	9395301	0.0909090909090909
953	9395358	0.0909090909090909
954	9397180	0
955	9397221	0.0909090909090909
956	9397328	0.0909090909090909
957	9397335	0.0909090909090909
958	9397356	0.0909090909090909
959	9397587	0.0909090909090909
960	9397666	0.0909090909090909
961	9398030	0.0909090909090909
962	9398401	0.0909090909090909
963	9398419	0.0909090909090909
964	9398455	0.0909090909090909
965	9398642	0.0909090909090909
966	9398643	0.0909090909090909
967	9398660	0.0909090909090909
968	9398733	0.0909090909090909
969	9399036	0.0909090909090909
970	9399350	0.0909090909090909
971	9399378	0.0909090909090909
972	9399604	0.0909090909090909
973	9399605	0.0909090909090909
974	9399623	0.0909090909090909
975	9399641	0.0909090909090909
976	9399673	0.0909090909090909
977	9399755	0
978	9399791	0
979	9399927	0
980	9400413	0
981	9400472	0
982	9400654	0
983	9400813	0
984	9400892	0
985	9401088	0
986	9401781	0
987	9401846	0
988	9401855	0
989	9402130	0.0909090909090909
990	9402175	0.0909090909090909
991	9402275	0.0909090909090909
992	9402316	0.0909090909090909
993	9402515	0.0909090909090909
994	9402517	0.0909090909090909
995	9403020	0.0909090909090909
996	9403055	0.0909090909090909
997	9403414	0.0909090909090909
998	9403486	0.0909090909090909
999	9403716	0.0909090909090909
1000	9403888	0
1001	9403982	0
1002	9404223	0
1003	9404561	0
1004	9404634	0
1005	9404838	0
1006	9404885	0
1007	9405333	0
1008	9405405	0
1009	9405444	0
1010	9405823	0
1011	9405940	0
1012	9406050	0
1013	9406264	0
1014	9406371	0
1015	9406496	0
1016	9406604	0
1017	9406877	0
1018	9406943	0
1019	9407001	0
1020	9407048	0
1021	9407144	0
1022	9407251	0
1023	9407317	0
1024	9407363	0
1025	9407435	0
1026	9407708	0
1027	9408117	0
1028	9408844	0
1029	9409094	0
1030	9409136	0
1031	9409832	0
1032	9412296	0
1033	9412365	0
1034	9412764	0.0909090909090909
1035	9413209	0.181818181818182
1036	9414925	0.272727272727273
1037	9414938	0.363636363636364
1038	9414939	0.363636363636364
1039	9414983	0.363636363636364
1040	9415014	0.363636363636364
1041	9415036	0.363636363636364
1042	9415125	0.363636363636364
1043	9415544	0.363636363636364
1044	9416238	0.454545454545455
1045	9416347	0.363636363636364
1046	9416349	0.272727272727273
1047	9416351	0.181818181818182
1048	9416355	0.0909090909090909
1049	9417023	0.0909090909090909
1050	9417266	0.0909090909090909
1051	9417400	0.0909090909090909
1052	9417497	0.0909090909090909
1053	9418472	0.0909090909090909
1054	9418536	0.0909090909090909
1055	9419145	0
1056	9419440	0
1057	9420740	0
1058	9422117	0.0909090909090909
1059	9422780	0.181818181818182
1060	9423180	0.181818181818182
1061	9423467	0.181818181818182
1062	9423648	0.181818181818182
1063	9423833	0.181818181818182
1064	9423839	0.181818181818182
1065	9423840	0.181818181818182
1066	9425194	0.181818181818182
1067	9425684	0.181818181818182
1068	9425738	0.272727272727273
1069	9425879	0.181818181818182
1070	9425882	0.0909090909090909
1071	9425956	0.0909090909090909
1072	9426387	0.0909090909090909
1073	9426951	0.0909090909090909
1074	9427212	0.0909090909090909
1075	9427415	0.0909090909090909
1076	9427767	0.181818181818182
1077	9428233	0.272727272727273
1078	9428369	0.363636363636364
1079	9428449	0.363636363636364
1080	9428465	0.454545454545455
1081	9428611	0.545454545454545
1082	9428625	0.545454545454545
1083	9428633	0.636363636363636
1084	9428636	0.636363636363636
1085	9428727	0.636363636363636
1086	9428782	0.727272727272727
1087	9428833	0.636363636363636
1088	9428852	0.545454545454545
1089	9428890	0.454545454545455
1090	9428914	0.363636363636364
1091	9428931	0.272727272727273
1092	9429394	0.181818181818182
1093	9429401	0.272727272727273
1094	9429409	0.181818181818182
1095	9429422	0.181818181818182
1096	9429460	0.181818181818182
1097	9429511	0.0909090909090909
1098	9429518	0.0909090909090909
1099	9429977	0.0909090909090909
1100	9430651	0.0909090909090909
1101	9431418	0.0909090909090909
1102	9431600	0.0909090909090909
1103	9431728	0.0909090909090909
1104	9431746	0
1105	9431863	0
1106	9431864	0
1107	9431869	0.0909090909090909
1108	9432029	0.181818181818182
1109	9432086	0.181818181818182
1110	9432105	0.181818181818182
1111	9432107	0.181818181818182
1112	9432244	0.272727272727273
1113	9432247	0.272727272727273
1114	9432303	0.272727272727273
1115	9432351	0.272727272727273
1116	9432764	0.272727272727273
1117	9432963	0.272727272727273
1118	9433378	0.181818181818182
1119	9433708	0.0909090909090909
1120	9433904	0.0909090909090909
1121	9434848	0.0909090909090909
1122	9435007	0.0909090909090909
1123	9435282	0
1124	9435329	0
1125	9435369	0
1126	9435417	0
1127	9435633	0
1128	9435984	0
1129	9436029	0
1130	9436182	0
1131	9436385	0
1132	9436531	0
1133	9437044	0
1134	9437167	0
1135	9437220	0
1136	9438308	0
1137	9438570	0
1138	9438598	0
1139	9439112	0
1140	9439383	0
1141	9439813	0
1142	9439816	0
1143	9439872	0
1144	9440086	0
1145	9440269	0
1146	9440301	0
1147	9440404	0
1148	9441330	0
1149	9441547	0.0909090909090909
1150	9441578	0.181818181818182
1151	9441710	0.272727272727273
1152	9441745	0.363636363636364
1153	9441756	0.363636363636364
1154	9442441	0.363636363636364
1155	9442473	0.363636363636364
1156	9442561	0.363636363636364
1157	9442666	0.363636363636364
1158	9442971	0.363636363636364
1159	9443556	0.363636363636364
1160	9443584	0.272727272727273
1161	9443764	0.272727272727273
1162	9443880	0.181818181818182
1163	9444011	0.0909090909090909
1164	9444061	0.0909090909090909
1165	9444079	0.0909090909090909
1166	9444233	0.0909090909090909
1167	9444234	0.181818181818182
1168	9444364	0.272727272727273
1169	9444470	0.272727272727273
1170	9445035	0.272727272727273
1171	9445149	0.272727272727273
1172	9445583	0.181818181818182
1173	9445639	0.181818181818182
1174	9445772	0.272727272727273
1175	9445921	0.272727272727273
1176	9445978	0.272727272727273
1177	9445984	0.363636363636364
1178	9446204	0.272727272727273
1179	9446344	0.181818181818182
1180	9446623	0.181818181818182
1181	9447360	0.181818181818182
1182	9448027	0.181818181818182
1183	9448308	0.181818181818182
1184	9448777	0.181818181818182
1185	9448821	0.0909090909090909
1186	9448828	0.0909090909090909
1187	9449544	0.0909090909090909
1188	9449897	0
1189	9449905	0
1190	9450169	0
1191	9450262	0
1192	9450367	0
1193	9450609	0
1194	9450610	0
1195	9450900	0.0909090909090909
1196	9451000	0.0909090909090909
1197	9451020	0.181818181818182
1198	9451201	0.181818181818182
1199	9451362	0.181818181818182
1200	9451900	0.272727272727273
1201	9452012	0.272727272727273
1202	9452028	0.272727272727273
1203	9452129	0.272727272727273
1204	9452233	0.272727272727273
1205	9452270	0.272727272727273
1206	9452314	0.181818181818182
1207	9452427	0.181818181818182
1208	9452712	0.0909090909090909
1209	9452734	0.0909090909090909
1210	9453163	0.0909090909090909
1211	9453932	0
1212	9454106	0
1213	9454107	0
1214	9454196	0
1215	9454395	0
1216	9454706	0
1217	9454805	0.0909090909090909
1218	9455025	0.0909090909090909
1219	9455167	0.181818181818182
1220	9455343	0.272727272727273
1221	9455449	0.272727272727273
1222	9455723	0.272727272727273
1223	9455757	0.272727272727273
1224	9455869	0.272727272727273
1225	9455902	0.272727272727273
1226	9456042	0.272727272727273
1227	9456143	0.272727272727273
1228	9456168	0.181818181818182
1229	9456189	0.181818181818182
1230	9456651	0.0909090909090909
1231	9456873	0
1232	9456996	0
1233	9457229	0
1234	9457587	0
1235	9457713	0
1236	9457811	0
1237	9457928	0
1238	9457936	0
1239	9458001	0
1240	9458292	0
1241	9458778	0
1242	9458795	0
1243	9459245	0
1244	9459498	0
1245	9459828	0.0909090909090909
1246	9459891	0.0909090909090909
1247	9460192	0.0909090909090909
1248	9461215	0.0909090909090909
1249	9461439	0.0909090909090909
1250	9462044	0.0909090909090909
1251	9462052	0.0909090909090909
1252	9462054	0.0909090909090909
1253	9462408	0.0909090909090909
1254	9462535	0.0909090909090909
1255	9462713	0.0909090909090909
1256	9462752	0
1257	9462942	0
1258	9463848	0
1259	9463906	0
1260	9463999	0
1261	9464086	0
1262	9464290	0.0909090909090909
1263	9464350	0.181818181818182
1264	9464386	0.181818181818182
1265	9465510	0.181818181818182
1266	9465524	0.181818181818182
1267	9465616	0.181818181818182
1268	9465675	0.181818181818182
1269	9466782	0.181818181818182
1270	9466972	0.181818181818182
1271	9467047	0.181818181818182
1272	9467215	0.272727272727273
1273	9467298	0.272727272727273
1274	9467639	0.272727272727273
1275	9467695	0.272727272727273
1276	9467980	0.272727272727273
1277	9468105	0.272727272727273
1278	9468372	0.272727272727273
1279	9468424	0.363636363636364
1280	9468495	0.363636363636364
1281	9468515	0.363636363636364
1282	9468894	0.363636363636364
1283	9468919	0.272727272727273
1284	9469082	0.181818181818182
1285	9469240	0.181818181818182
1286	9469513	0.181818181818182
1287	9469663	0.181818181818182
1288	9469964	0.272727272727273
1289	9470952	0.272727272727273
1290	9471337	0.181818181818182
1291	9471374	0.181818181818182
1292	9471647	0.181818181818182
1293	9471683	0.181818181818182
1294	9471820	0.181818181818182
1295	9471824	0.181818181818182
1296	9471834	0.0909090909090909
1297	9471878	0.0909090909090909
1298	9472139	0.0909090909090909
1299	9472160	0
1300	9472164	0
1301	9472507	0
1302	9472509	0
1303	9472687	0
1304	9472771	0
1305	9472811	0
1306	9472976	0
1307	9473107	0
1308	9473232	0
1309	9473467	0
1310	9473630	0
1311	9473921	0
1312	9474078	0
1313	9474098	0.0909090909090909
1314	9474243	0.0909090909090909
1315	9474274	0.181818181818182
1316	9474534	0.181818181818182
1317	9475305	0.181818181818182
1318	9475872	0.272727272727273
1319	9475873	0.272727272727273
1320	9477403	0.272727272727273
1321	9477706	0.272727272727273
1322	9480667	0.272727272727273
1323	9481732	0.272727272727273
1324	9484016	0.181818181818182
1325	9484192	0.181818181818182
1326	9484730	0.0909090909090909
1327	9485452	0.181818181818182
1328	9485454	0.272727272727273
1329	9485472	0.181818181818182
1330	9486159	0.272727272727273
1331	9486719	0.363636363636364
1332	9487304	0.363636363636364
1333	9488801	0.363636363636364
1334	9489052	0.454545454545455
1335	9489128	0.454545454545455
1336	9489474	0.454545454545455
1337	9490421	0.545454545454545
1338	9492278	0.454545454545455
1339	9492364	0.363636363636364
1340	9492496	0.363636363636364
1341	9492789	0.272727272727273
1342	9492936	0.181818181818182
1343	9493004	0.272727272727273
1344	9493238	0.272727272727273
1345	9493368	0.181818181818182
1346	9493572	0.272727272727273
1347	9493903	0.272727272727273
1348	9494588	0.181818181818182
1349	9494885	0.181818181818182
1350	9494918	0.181818181818182
1351	9495016	0.181818181818182
1352	9495288	0.181818181818182
1353	9495331	0.181818181818182
1354	9495351	0.181818181818182
1355	9495479	0.181818181818182
1356	9495505	0.181818181818182
1357	9495512	0.0909090909090909
1358	9495626	0.0909090909090909
1359	9495731	0.181818181818182
1360	9495755	0.181818181818182
1361	9495778	0.181818181818182
1362	9496008	0.181818181818182
1363	9496100	0.181818181818182
1364	9496179	0.181818181818182
1365	9496208	0.0909090909090909
1366	9496209	0.0909090909090909
1367	9496213	0.0909090909090909
1368	9496260	0.0909090909090909
1369	9496284	0.0909090909090909
1370	9496489	0
1371	9496593	0
1372	9498183	0
1373	9498273	0
1374	9498387	0
1375	9498587	0
1376	9498665	0
1377	9498680	0
1378	9498726	0
1379	9498764	0.0909090909090909
1380	9498915	0.0909090909090909
1381	9499084	0.0909090909090909
1382	9499151	0.0909090909090909
1383	9499210	0.0909090909090909
1384	9499407	0.0909090909090909
1385	9499490	0.0909090909090909
1386	9499610	0.0909090909090909
1387	9499889	0.0909090909090909
1388	9499975	0.0909090909090909
1389	9500610	0.0909090909090909
1390	9500809	0
1391	9501246	0
1392	9501285	0
1393	9501415	0
1394	9501431	0.0909090909090909
1395	9501440	0.0909090909090909
1396	9501715	0.181818181818182
1397	9501902	0.272727272727273
1398	9502402	0.272727272727273
1399	9502449	0.272727272727273
1400	9503233	0.272727272727273
1401	9503303	0.272727272727273
1402	9503721	0.272727272727273
1403	9503885	0.272727272727273
1404	9504296	0.272727272727273
1405	9504525	0.181818181818182
1406	9505005	0.181818181818182
1407	9505226	0.0909090909090909
1408	9505395	0
1409	9505549	0
1410	9505860	0
1411	9506135	0
1412	9506136	0
1413	9506513	0.0909090909090909
1414	9506791	0.0909090909090909
1415	9507084	0.0909090909090909
1416	9507340	0.0909090909090909
1417	9508167	0.0909090909090909
1418	9508173	0.0909090909090909
1419	9508449	0.0909090909090909
1420	9508663	0.0909090909090909
1421	9508770	0.0909090909090909
1422	9509126	0.0909090909090909
1423	9509282	0.0909090909090909
1424	9509465	0.0909090909090909
1425	9509494	0.0909090909090909
1426	9510303	0.0909090909090909
1427	9510340	0.181818181818182
1428	9510675	0.181818181818182
1429	9511120	0.181818181818182
1430	9511125	0.181818181818182
1431	9511342	0.181818181818182
1432	9511791	0.181818181818182
1433	9512450	0.272727272727273
1434	9512527	0.272727272727273
1435	9512624	0.181818181818182
1436	9512645	0.181818181818182
1437	9513488	0.181818181818182
1438	9513529	0.0909090909090909
1439	9513642	0.181818181818182
1440	9513673	0.181818181818182
1441	9513850	0.181818181818182
1442	9513900	0.181818181818182
1443	9514092	0.181818181818182
1444	9514247	0.0909090909090909
1445	9514276	0.181818181818182
1446	9514391	0.181818181818182
1447	9515554	0.181818181818182
1448	9516333	0.181818181818182
1449	9517458	0.181818181818182
1450	9517894	0.0909090909090909
1451	9517899	0.0909090909090909
1452	9517904	0.0909090909090909
1453	9517909	0.0909090909090909
1454	9517914	0.0909090909090909
1455	9517928	0.0909090909090909
1456	9518095	0
1457	9518139	0
1458	9518438	0
1459	9518562	0
1460	9518567	0
1461	9518776	0
1462	9518823	0
1463	9518931	0
1464	9518934	0
1465	9520117	0
1466	9520496	0
1467	9520512	0
1468	9520561	0
1469	9520834	0
1470	9520922	0
1471	9520997	0
1472	9521353	0
1473	9521380	0
1474	9521388	0
1475	9522025	0
1476	9522046	0
1477	9522056	0
1478	9522057	0
1479	9522239	0
1480	9522566	0
1481	9522631	0
1482	9522639	0
1483	9522821	0
1484	9523058	0
1485	9523213	0
1486	9524088	0
1487	9524160	0
1488	9524162	0
1489	9524196	0
1490	9525081	0
1491	9525142	0
1492	9525692	0
1493	9525696	0
1494	9526115	0
1495	9526276	0
1496	9526780	0
1497	9527150	0.0909090909090909
1498	9527488	0.0909090909090909
1499	9527492	0.0909090909090909
1500	9527499	0.0909090909090909
1501	9527529	0.0909090909090909
1502	9527537	0.0909090909090909
1503	9527764	0.0909090909090909
1504	9528033	0.0909090909090909
1505	9528160	0.181818181818182
1506	9528182	0.181818181818182
1507	9528207	0.181818181818182
1508	9528208	0.0909090909090909
1509	9528209	0.0909090909090909
1510	9528216	0.0909090909090909
1511	9528253	0.0909090909090909
1512	9528902	0.0909090909090909
1513	9529067	0.0909090909090909
1514	9529360	0.0909090909090909
1515	9529491	0.0909090909090909
1516	9529511	0
1517	9529577	0
1518	9529688	0
1519	9529766	0
1520	9529773	0
1521	9530088	0
1522	9531740	0
1523	9532276	0
1524	9533095	0
1525	9533300	0
1526	9533491	0
1527	9533685	0
1528	9533715	0
1529	9533792	0
1530	9533874	0
1531	9534245	0
1532	9534425	0
1533	9534450	0
1534	9534493	0
1535	9534662	0
1536	9534670	0
1537	9534691	0
1538	9534741	0
1539	9534747	0
1540	9535206	0
1541	9535650	0
1542	9535696	0
1543	9535967	0
1544	9536027	0
1545	9536028	0
1546	9536056	0
1547	9536195	0.0909090909090909
1548	9536362	0.0909090909090909
1549	9536624	0.0909090909090909
1550	9537154	0.0909090909090909
1551	9537172	0.0909090909090909
1552	9537354	0.0909090909090909
1553	9537511	0.0909090909090909
1554	9537555	0.0909090909090909
1555	9537556	0.0909090909090909
1556	9537565	0.0909090909090909
1557	9537697	0.0909090909090909
1558	9537699	0
1559	9537780	0
1560	9538134	0
1561	9538161	0
1562	9538230	0
1563	9538320	0
1564	9538380	0
1565	9538530	0
1566	9538894	0
1567	9539003	0
1568	9539029	0
1569	9539131	0
1570	9539496	0
1571	9539650	0
1572	9539693	0.0909090909090909
1573	9539856	0.0909090909090909
1574	9539946	0.181818181818182
1575	9540151	0.181818181818182
1576	9540383	0.181818181818182
1577	9540981	0.181818181818182
1578	9542285	0.181818181818182
1579	9542524	0.181818181818182
1580	9542826	0.181818181818182
1581	9543002	0.181818181818182
1582	9543081	0.181818181818182
1583	9543089	0.0909090909090909
1584	9543110	0.0909090909090909
1585	9543112	0
1586	9543441	0
1587	9543447	0
1588	9543483	0
1589	9543487	0
1590	9543735	0
1591	9543860	0
1592	9544056	0
1593	9544375	0
1594	9544725	0
1595	9544848	0
1596	9545657	0.0909090909090909
1597	9545740	0.0909090909090909
1598	9546080	0.0909090909090909
1599	9546249	0.181818181818182
1600	9546401	0.272727272727273
1601	9547729	0.272727272727273
1602	9547754	0.272727272727273
1603	9547967	0.363636363636364
1604	9548836	0.363636363636364
1605	9548879	0.363636363636364
1606	9548927	0.363636363636364
1607	9549186	0.272727272727273
1608	9549260	0.272727272727273
1609	9549466	0.272727272727273
1610	9549533	0.181818181818182
1611	9549617	0.0909090909090909
1612	9550879	0.0909090909090909
1613	9550955	0.181818181818182
1614	9551321	0.181818181818182
1615	9551324	0.181818181818182
1616	9551336	0.181818181818182
1617	9551751	0.181818181818182
1618	9552058	0.181818181818182
1619	9552210	0.181818181818182
1620	9552368	0.272727272727273
1621	9552896	0.363636363636364
1622	9552963	0.363636363636364
1623	9553043	0.363636363636364
1624	9553084	0.272727272727273
1625	9553085	0.181818181818182
1626	9553087	0.181818181818182
1627	9553185	0.181818181818182
1628	9553297	0.181818181818182
1629	9553608	0.181818181818182
1630	9553743	0.272727272727273
1631	9554716	0.181818181818182
1632	9555719	0.0909090909090909
1633	9556220	0.0909090909090909
1634	9556926	0.181818181818182
1635	9557108	0.181818181818182
1636	9557190	0.181818181818182
1637	9557298	0.181818181818182
1638	9557305	0.181818181818182
1639	9557451	0.181818181818182
1640	9558305	0.181818181818182
1641	9558311	0.181818181818182
1642	9558838	0.181818181818182
1643	9559014	0.181818181818182
1644	9559483	0.181818181818182
1645	9559536	0.0909090909090909
1646	9559552	0.0909090909090909
1647	9560695	0.0909090909090909
1648	9560734	0.0909090909090909
1649	9561005	0.0909090909090909
1650	9561271	0.0909090909090909
1651	9561290	0.0909090909090909
1652	9561550	0
1653	9561952	0
1654	9561991	0
1655	9561992	0
1656	9562048	0
1657	9562139	0
1658	9562141	0.0909090909090909
1659	9562226	0.181818181818182
1660	9562307	0.181818181818182
1661	9562854	0.272727272727273
1662	9562963	0.363636363636364
1663	9563089	0.363636363636364
1664	9563094	0.363636363636364
1665	9563687	0.363636363636364
1666	9563689	0.363636363636364
1667	9563728	0.363636363636364
1668	9563806	0.363636363636364
1669	9563872	0.272727272727273
1670	9563966	0.181818181818182
1671	9564087	0.181818181818182
1672	9564157	0.0909090909090909
1673	9564232	0
1674	9564455	0
1675	9564517	0.0909090909090909
1676	9564662	0.0909090909090909
1677	9564839	0.0909090909090909
1678	9564860	0.181818181818182
1679	9564863	0.181818181818182
1680	9564880	0.272727272727273
1681	9564988	0.272727272727273
1682	9565137	0.272727272727273
1683	9565255	0.363636363636364
1684	9565492	0.363636363636364
1685	9565976	0.454545454545455
1686	9566010	0.363636363636364
1687	9566172	0.363636363636364
1688	9566326	0.454545454545455
1689	9566408	0.363636363636364
1690	9566466	0.363636363636364
1691	9566635	0.272727272727273
1692	9566638	0.272727272727273
1693	9566641	0.272727272727273
1694	9566845	0.181818181818182
1695	9566980	0.181818181818182
1696	9567018	0.0909090909090909
1697	9567089	0.0909090909090909
1698	9567242	0.181818181818182
1699	9567334	0.181818181818182
1700	9567374	0.181818181818182
1701	9567491	0.272727272727273
1702	9567567	0.272727272727273
1703	9567838	0.363636363636364
1704	9568410	0.454545454545455
1705	9568453	0.545454545454545
1706	9568758	0.636363636363636
1707	9568823	0.727272727272727
1708	9568867	0.727272727272727
1709	9568868	0.727272727272727
1710	9568876	0.727272727272727
1711	9568938	0.818181818181818
1712	9569039	0.818181818181818
1713	9569139	0.818181818181818
1714	9569192	0.818181818181818
1715	9569449	0.818181818181818
1716	9569456	0.727272727272727
1717	9569549	0.636363636363636
1718	9569567	0.636363636363636
1719	9569730	0.727272727272727
1720	9569792	0.727272727272727
1721	9569865	0.636363636363636
1722	9569873	0.636363636363636
1723	9569932	0.636363636363636
1724	9569936	0.727272727272727
1725	9570043	0.727272727272727
1726	9570739	0.636363636363636
1727	9570895	0.636363636363636
1728	9571027	0.636363636363636
1729	9571090	0.545454545454545
1730	9571210	0.454545454545455
1731	9571231	0.363636363636364
1732	9571414	0.454545454545455
1733	9571507	0.363636363636364
1734	9571879	0.363636363636364
1735	9572284	0.272727272727273
1736	9572372	0.272727272727273
1737	9574033	0.363636363636364
1738	9574255	0.454545454545455
1739	9574382	0.545454545454545
1740	9574497	0.545454545454545
1741	9574508	0.636363636363636
1742	9574595	0.727272727272727
1743	9574685	0.727272727272727
1744	9574911	0.818181818181818
1745	9575111	0.818181818181818
1746	9575539	0.909090909090909
1747	9575563	0.909090909090909
1748	9575754	0.909090909090909
1749	9575783	0.909090909090909
1750	9576019	0.818181818181818
1751	9576029	0.909090909090909
1752	9576357	0.909090909090909
1753	9576358	0.818181818181818
1754	9576589	0.818181818181818
1755	9576677	0.818181818181818
1756	9577179	0.727272727272727
1757	9577329	0.636363636363636
1758	9577593	0.545454545454545
1759	9577819	0.454545454545455
1760	9577997	0.454545454545455
1761	9578021	0.545454545454545
1762	9578022	0.545454545454545
1763	9578024	0.545454545454545
1764	9578050	0.636363636363636
1765	9578247	0.636363636363636
1766	9578336	0.636363636363636
1767	9578932	0.727272727272727
1768	9579011	0.818181818181818
1769	9579015	0.909090909090909
1770	9579016	0.909090909090909
1771	9579207	0.818181818181818
1772	9579410	0.727272727272727
1773	9579440	0.727272727272727
1774	9579871	0.727272727272727
1775	9580107	0.727272727272727
1776	9580128	0.727272727272727
1777	9580216	0.636363636363636
1778	9580396	0.545454545454545
1779	9580457	0.454545454545455
1780	9580922	0.454545454545455
1781	9580931	0.545454545454545
1782	9581200	0.636363636363636
1783	9581214	0.727272727272727
1784	9581215	0.727272727272727
1785	9581374	0.636363636363636
1786	9581495	0.636363636363636
1787	9581533	0.636363636363636
1788	9581568	0.727272727272727
1789	9581640	0.818181818181818
1790	9581651	0.909090909090909
1791	9581821	0.909090909090909
1792	9581918	0.818181818181818
1793	9582135	0.818181818181818
1794	9582608	0.727272727272727
1795	9582966	0.727272727272727
1796	9582975	0.818181818181818
1797	9582976	0.818181818181818
1798	9582986	0.727272727272727
1799	9583014	0.727272727272727
1800	9583915	0.727272727272727
1801	9584159	0.727272727272727
1802	9584161	0.727272727272727
1803	9584202	0.727272727272727
1804	9584260	0.636363636363636
1805	9584262	0.727272727272727
1806	9585083	0.727272727272727
1807	9585095	0.727272727272727
1808	9585230	0.727272727272727
1809	9585360	0.818181818181818
1810	9586291	0.818181818181818
1811	9586670	0.818181818181818
1812	9587213	0.818181818181818
1813	9587279	0.818181818181818
1814	9587607	0.909090909090909
1815	9587634	0.909090909090909
1816	9587706	0.909090909090909
1817	9588002	0.818181818181818
1818	9588003	0.727272727272727
1819	9589333	0.636363636363636
1820	9590225	0.636363636363636
1821	9590592	0.636363636363636
1822	9590966	0.636363636363636
1823	9591226	0.636363636363636
1824	9591411	0.545454545454545
1825	9591551	0.545454545454545
1826	9591697	0.636363636363636
1827	9591720	0.545454545454545
1828	9591912	0.545454545454545
1829	9591913	0.636363636363636
1830	9592007	0.727272727272727
1831	9592121	0.727272727272727
1832	9592682	0.727272727272727
1833	9593230	0.727272727272727
1834	9593310	0.636363636363636
1835	9593919	0.727272727272727
1836	9593973	0.636363636363636
1837	9594038	0.636363636363636
1838	9595125	0.727272727272727
1839	9595450	0.818181818181818
1840	9595656	0.727272727272727
1841	9596638	0.727272727272727
1842	9596694	0.727272727272727
1843	9597063	0.636363636363636
1844	9599398	0.545454545454545
1845	9599515	0.545454545454545
1846	9599719	0.545454545454545
1847	9599929	0.545454545454545
1848	9599962	0.454545454545455
1849	9600142	0.363636363636364
1850	9600972	0.363636363636364
1851	9601336	0.363636363636364
1852	9601346	0.272727272727273
1853	9601688	0.272727272727273
1854	9601819	0.272727272727273
1855	9602071	0.363636363636364
1856	9602515	0.454545454545455
1857	9602556	0.454545454545455
1858	9602709	0.454545454545455
1859	9602781	0.454545454545455
1860	9603071	0.545454545454545
1861	9603595	0.545454545454545
1862	9603705	0.545454545454545
1863	9603737	0.636363636363636
1864	9603866	0.545454545454545
1865	9604113	0.545454545454545
1866	9604502	0.545454545454545
1867	9604526	0.545454545454545
1868	9604595	0.545454545454545
1869	9604900	0.636363636363636
1870	9604964	0.727272727272727
1871	9605189	0.636363636363636
1872	9605274	0.636363636363636
1873	9605900	0.636363636363636
1874	9606015	0.545454545454545
1875	9606378	0.545454545454545
1876	9607071	0.636363636363636
1877	9607195	0.636363636363636
1878	9607695	0.636363636363636
1879	9608901	0.636363636363636
1880	9609333	0.545454545454545
1881	9609384	0.545454545454545
1882	9609453	0.545454545454545
1883	9609874	0.454545454545455
1884	9609894	0.454545454545455
1885	9609925	0.454545454545455
1886	9610424	0.545454545454545
1887	9610717	0.545454545454545
1888	9610718	0.545454545454545
1889	9610948	0.454545454545455
1890	9611116	0.363636363636364
1891	9612034	0.454545454545455
1892	9612691	0.363636363636364
1893	9612988	0.454545454545455
1894	9613566	0.545454545454545
1895	9614922	0.545454545454545
1896	9615103	0.545454545454545
1897	9615195	0.545454545454545
1898	9615206	0.454545454545455
1899	9615427	0.363636363636364
1900	9615564	0.454545454545455
1901	9616775	0.545454545454545
1902	9616846	0.545454545454545
1903	9616922	0.636363636363636
1904	9616934	0.545454545454545
1905	9617161	0.545454545454545
1906	9617887	0.545454545454545
1907	9618073	0.545454545454545
1908	9619536	0.545454545454545
1909	9620179	0.545454545454545
1910	9620202	0.545454545454545
1911	9620729	0.454545454545455
1912	9620950	0.363636363636364
1913	9621608	0.272727272727273
1914	9622738	0.181818181818182
1915	9623784	0.272727272727273
1916	9623870	0.272727272727273
1917	9624327	0.363636363636364
1918	9624715	0.454545454545455
1919	9625347	0.363636363636364
1920	9625621	0.363636363636364
1921	9626145	0.363636363636364
1922	9626211	0.363636363636364
1923	9627016	0.363636363636364
1924	9627355	0.363636363636364
1925	9628345	0.454545454545455
1926	9629034	0.363636363636364
1927	9630247	0.272727272727273
1928	9630576	0.272727272727273
1929	9630904	0.181818181818182
1930	9630930	0.181818181818182
1931	9630936	0.181818181818182
1932	9631549	0.181818181818182
1933	9632064	0.181818181818182
1934	9632137	0.272727272727273
1935	9632654	0.272727272727273
1936	9632733	0.181818181818182
1937	9632756	0.181818181818182
1938	9632783	0.181818181818182
1939	9632961	0.0909090909090909
1940	9633726	0.181818181818182
1941	9633821	0.181818181818182
1942	9634589	0.181818181818182
1943	9634607	0.272727272727273
1944	9634619	0.272727272727273
1945	9634690	0.181818181818182
1946	9634767	0.181818181818182
1947	9635248	0.181818181818182
1948	9635437	0.272727272727273
1949	9635479	0.272727272727273
1950	9635722	0.272727272727273
1951	9637485	0.181818181818182
1952	9637689	0.181818181818182
1953	9638048	0.181818181818182
1954	9638178	0.0909090909090909
1955	9638628	0.0909090909090909
1956	9638765	0.0909090909090909
1957	9638891	0.181818181818182
1958	9638897	0.272727272727273
1959	9638903	0.181818181818182
1960	9638904	0.272727272727273
1961	9639007	0.363636363636364
1962	9639582	0.363636363636364
1963	9640520	0.363636363636364
1964	9640812	0.363636363636364
1965	9640917	0.454545454545455
1966	9641210	0.454545454545455
1967	9641320	0.454545454545455
1968	9641432	0.454545454545455
1969	9641446	0.363636363636364
1970	9641936	0.363636363636364
1971	9642104	0.272727272727273
1972	9642174	0.181818181818182
1973	9643130	0.181818181818182
1974	9646093	0.272727272727273
1975	9646782	0.272727272727273
1976	9647574	0.272727272727273
1977	9647680	0.272727272727273
1978	9647845	0.272727272727273
1979	9648320	0.181818181818182
1980	9648412	0.181818181818182
1981	9648490	0.181818181818182
1982	9648986	0.181818181818182
1983	9649214	0.272727272727273
1984	9649446	0.272727272727273
1985	9649505	0.181818181818182
1986	9650323	0.272727272727273
1987	9650634	0.272727272727273
1988	9650639	0.272727272727273
1989	9651038	0.272727272727273
1990	9651083	0.363636363636364
1991	9651369	0.363636363636364
1992	9651668	0.363636363636364
1993	9651680	0.454545454545455
1994	9652019	0.454545454545455
1995	9652056	0.454545454545455
1996	9652957	0.454545454545455
1997	9653028	0.363636363636364
1998	9653703	0.272727272727273
[truncated: 10,995 more rows]
